# Supplementary material
Source: PubMed Central journal article supplement (PMC5013305)

Raw file 18\_25 Scan 10783 Method FTMS; HCD Score 216 m/z 683.31

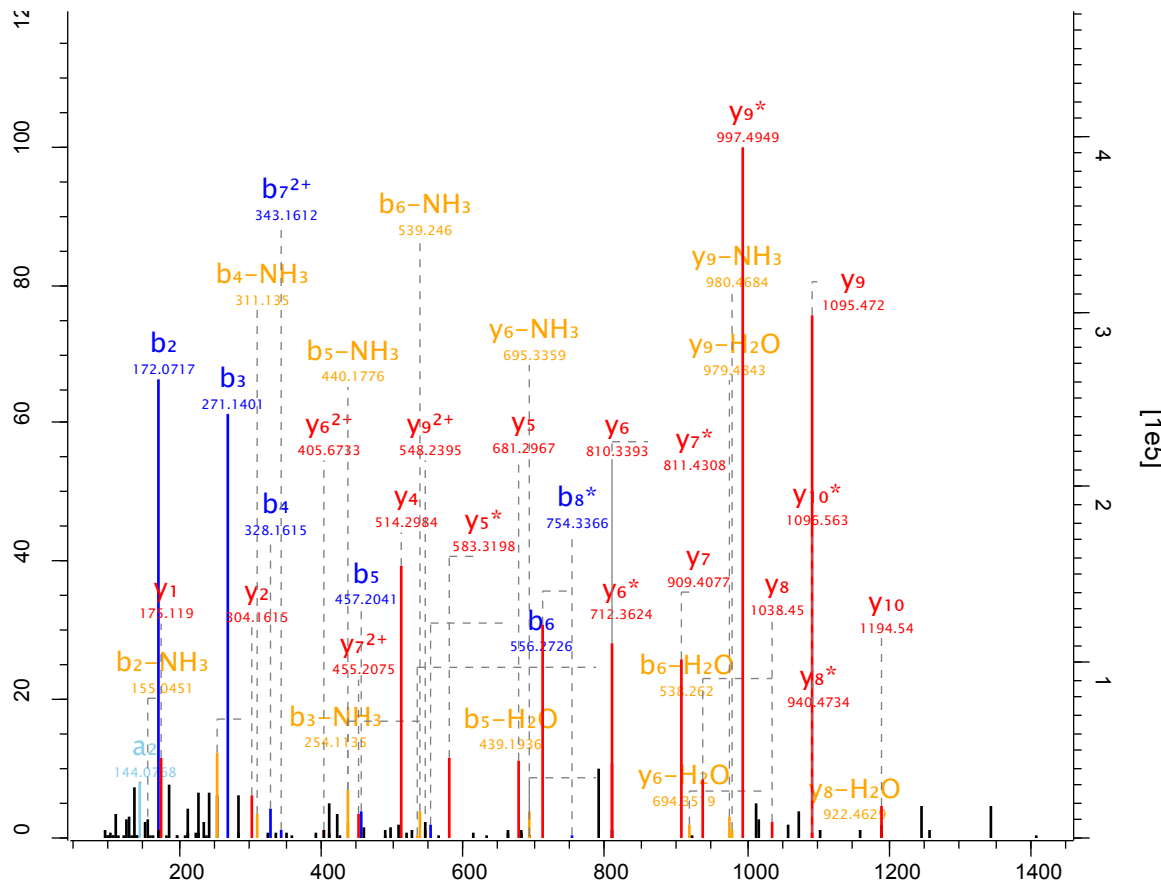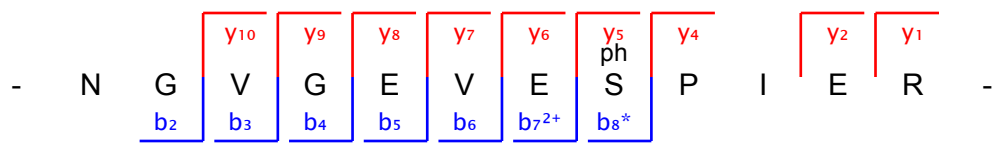



Raw file Scan Method Score m/z  
 18\_25 10946 FTMS; HCD 94.53 719.76

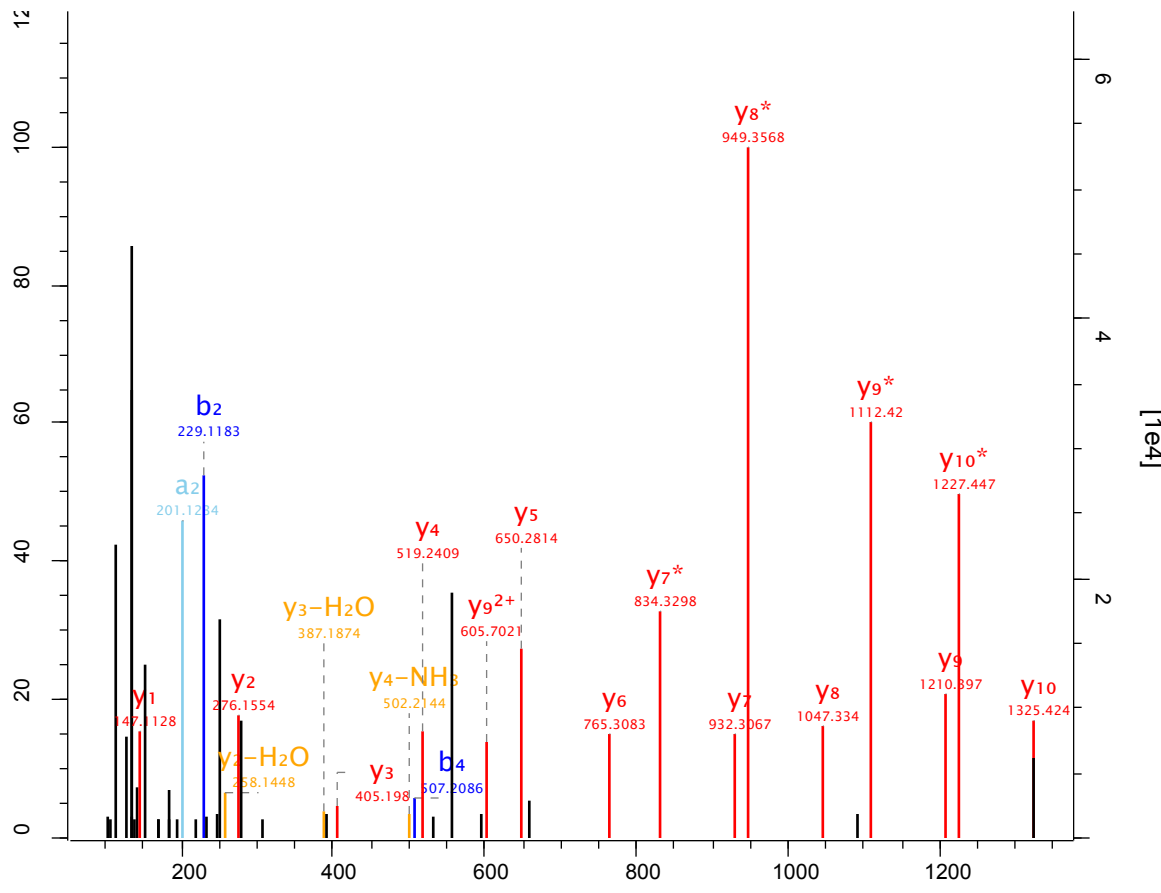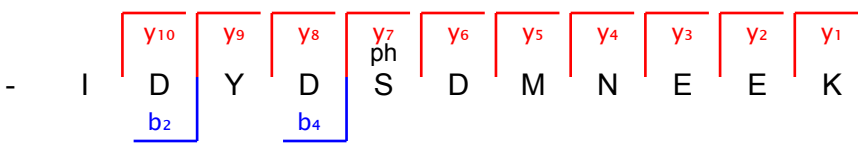



Raw file Scan Method Score m/z

18\_25 12178 FTMS; HCD 59.37 574.27

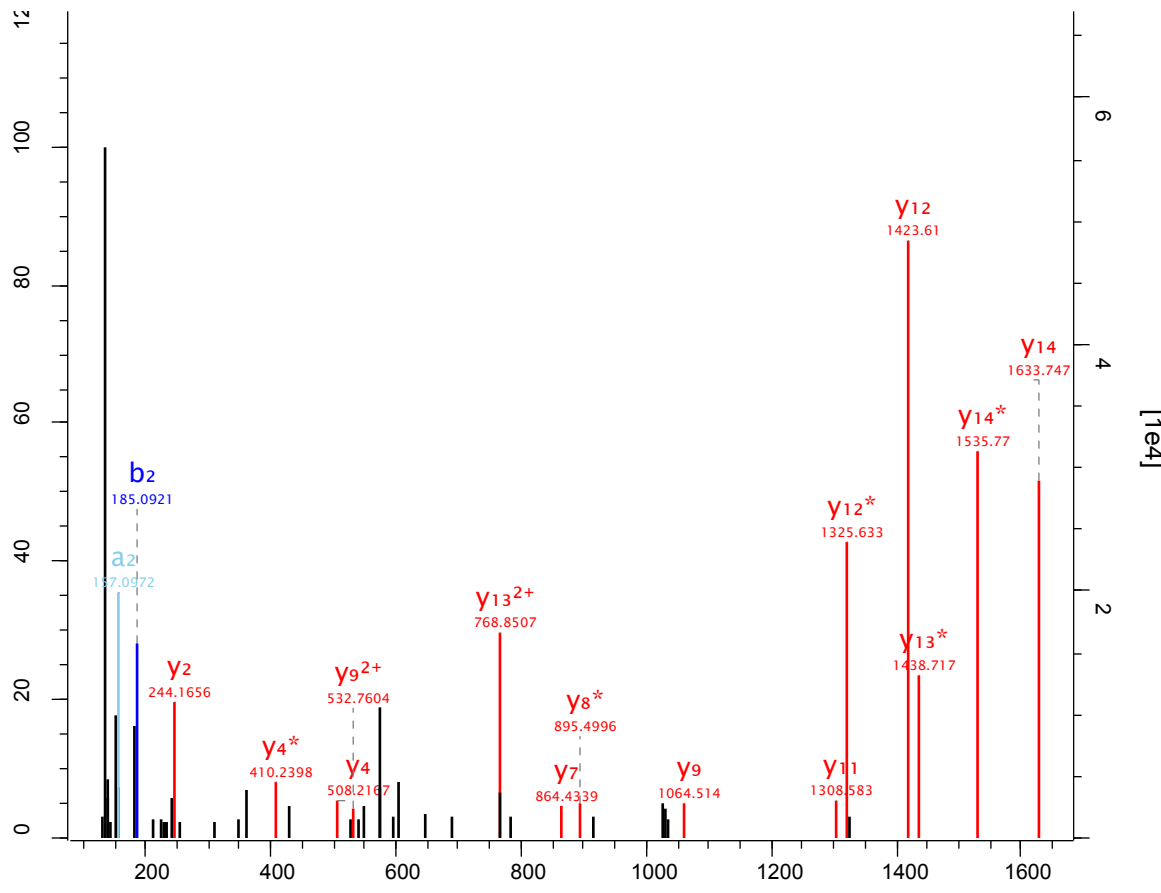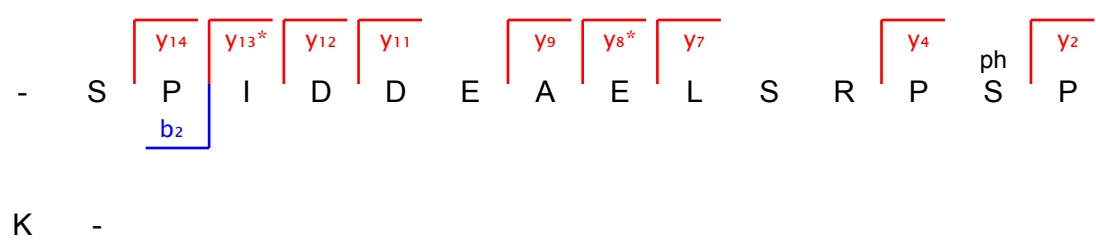

K -

Raw file Scan Method Score m/z  
 18\_25 1220 FTMS; HCD 109.53 676.63

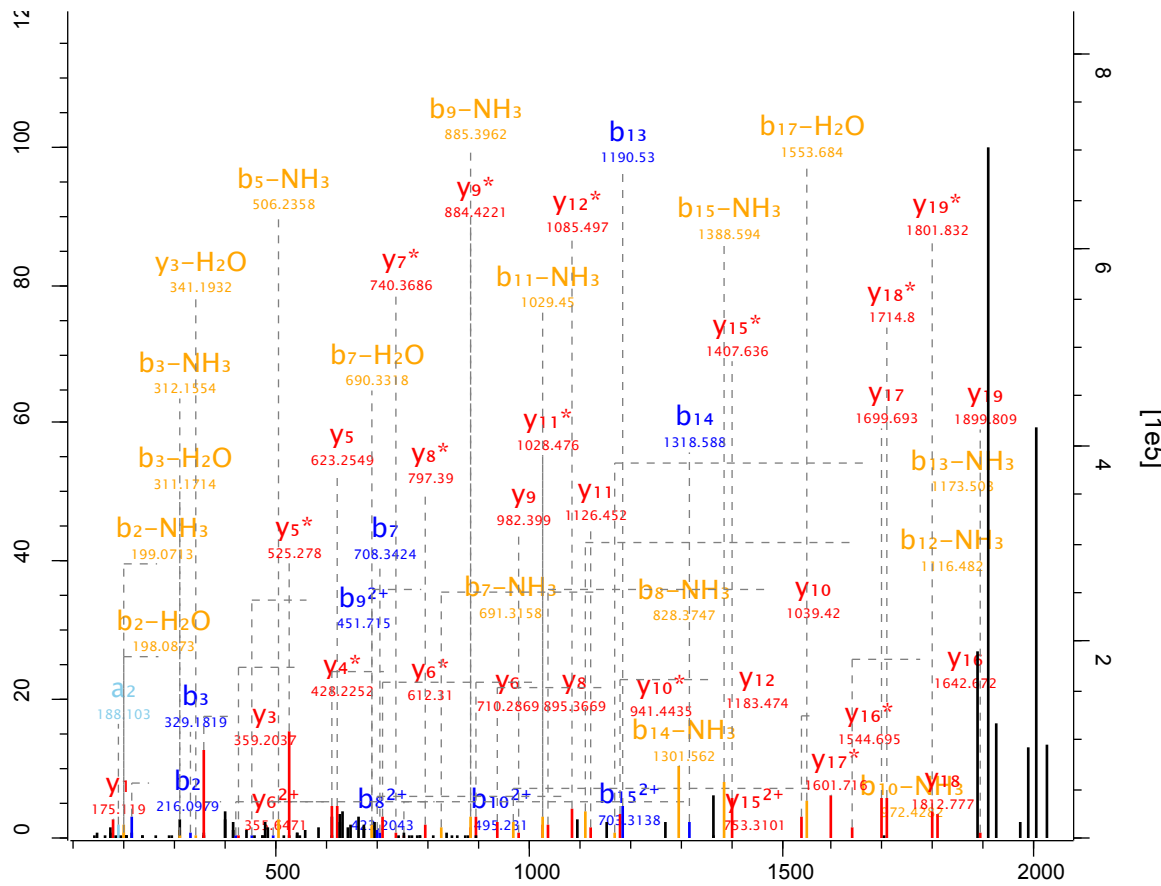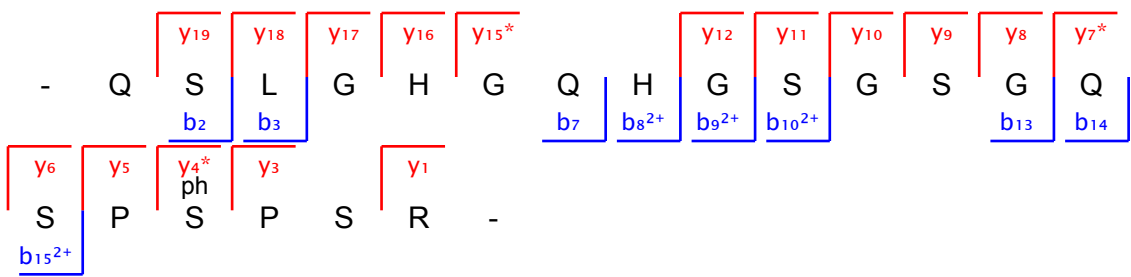

Raw file Scan Method Score m/z  
 18\_25 1224 FTMS; HCD 99.75 427.53

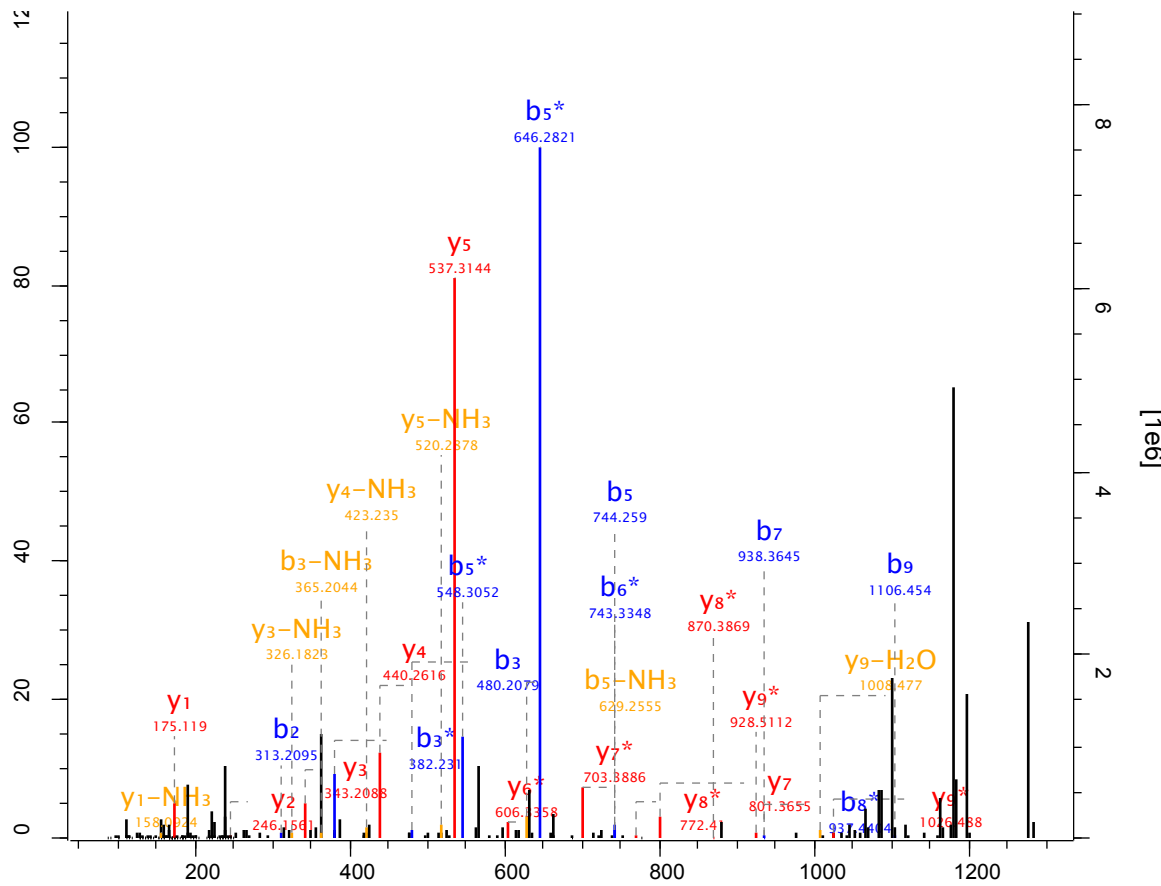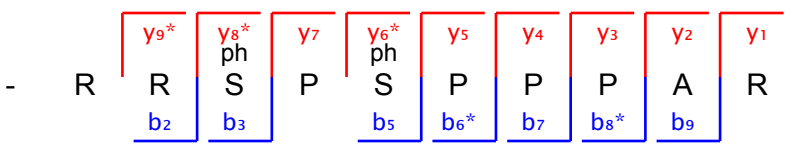

Raw file 18\_25 Scan 1238 Method FTMS; HCD Score 78.53 m/z 440.2

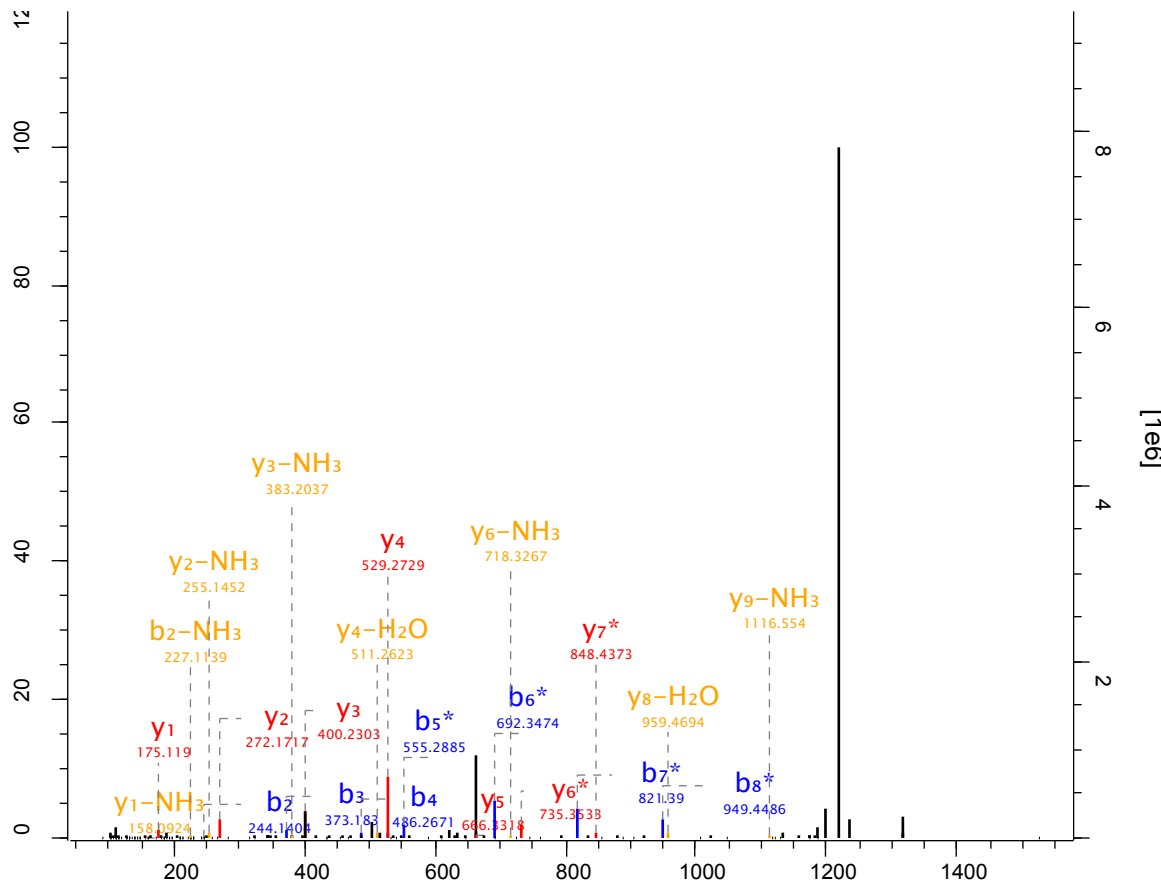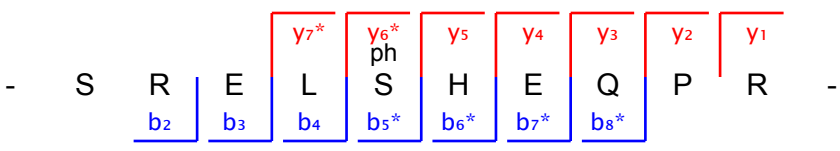

Raw file Scan Method Score m/z  
 18\_25 1249 FTMS; HCD 56.02 516.71

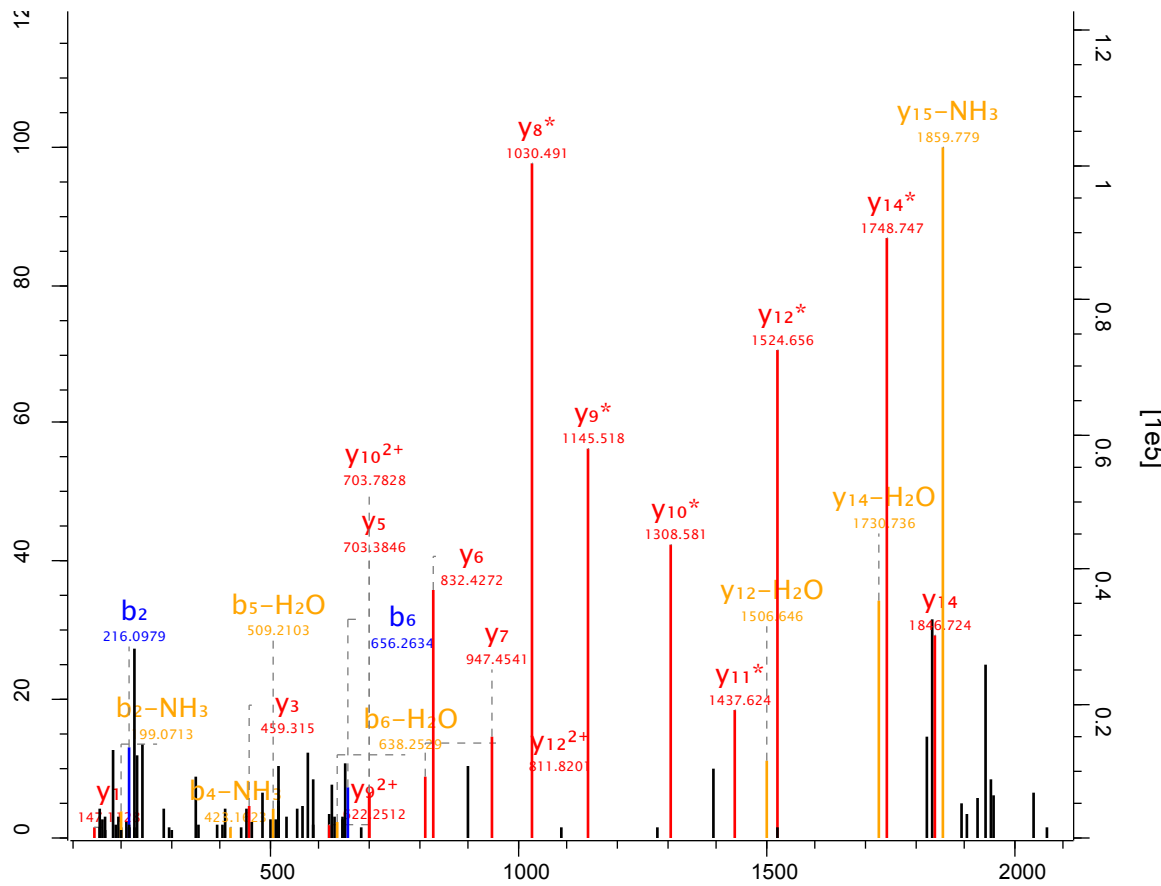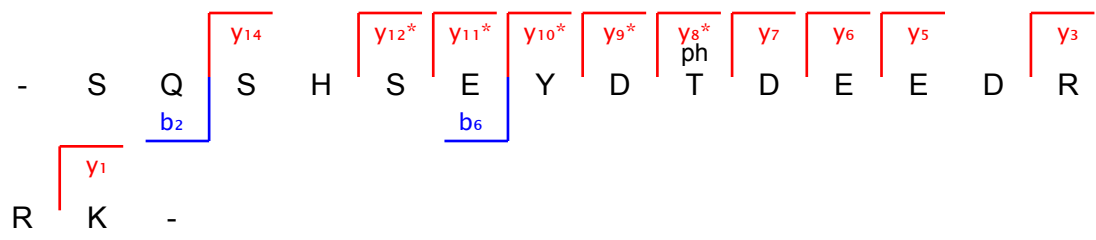

Raw file Scan Method Score m/z  
 18\_25 1251 FTMS; HCD 66.02 395.18

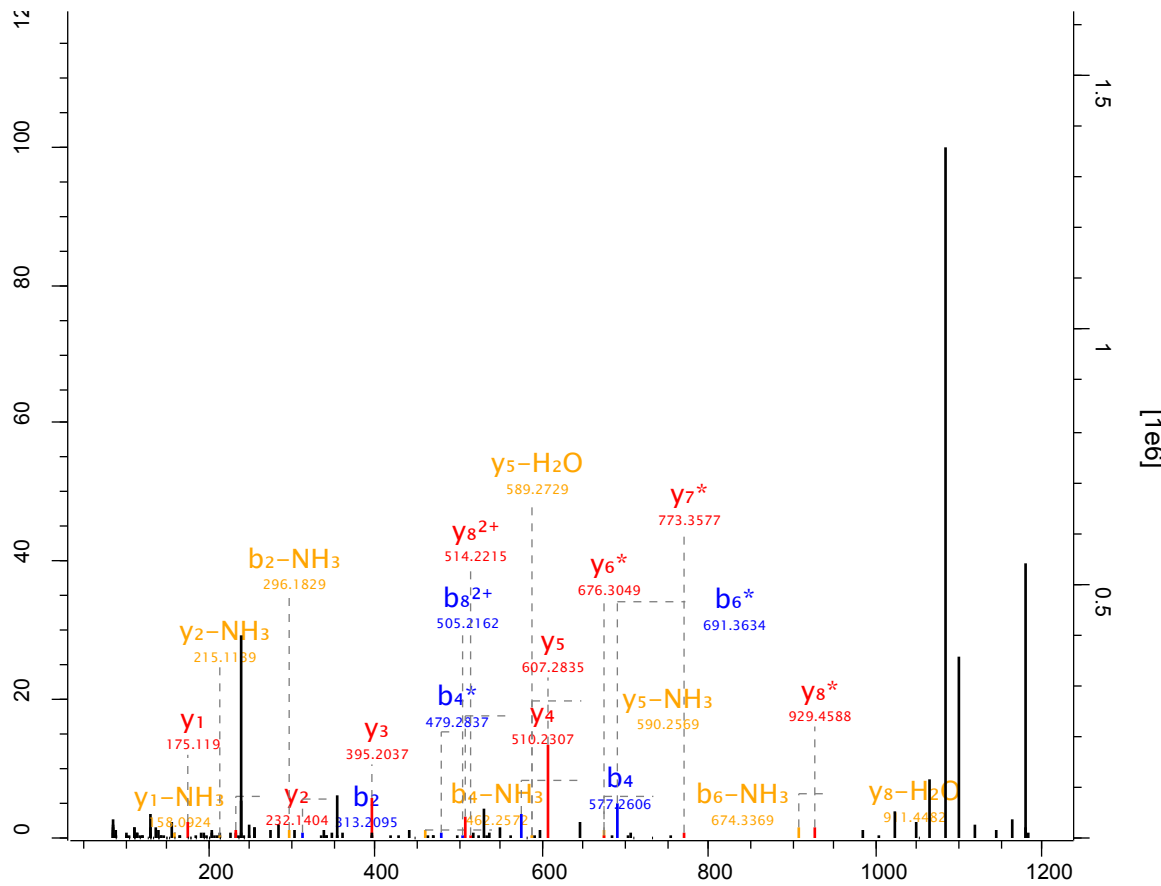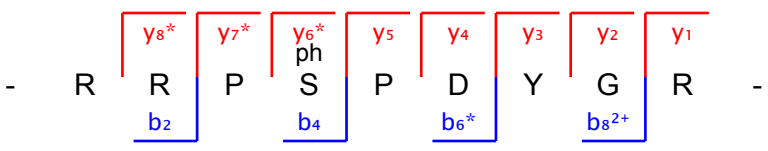



Raw file: 18\_25 Scan: 12615 Method: FTMS; HCD Score: 53.48 m/z: 718.67

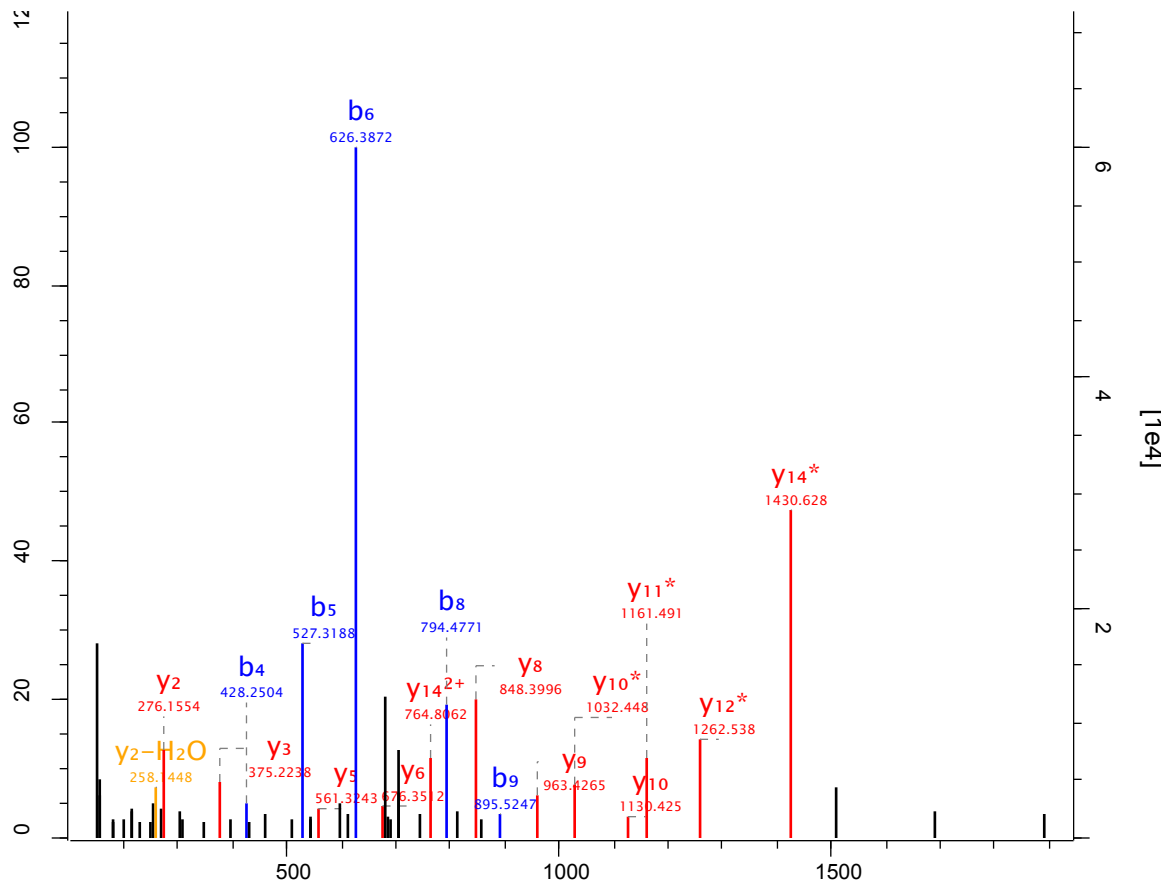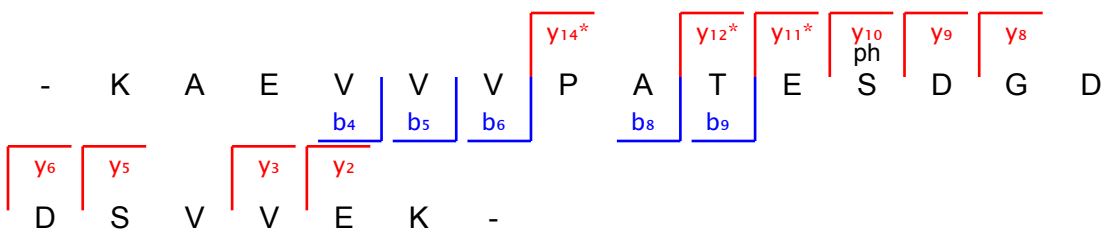

Raw file Scan Method Score m/z  
 18\_25 1300 FTMS; HCD 48.04 498.75

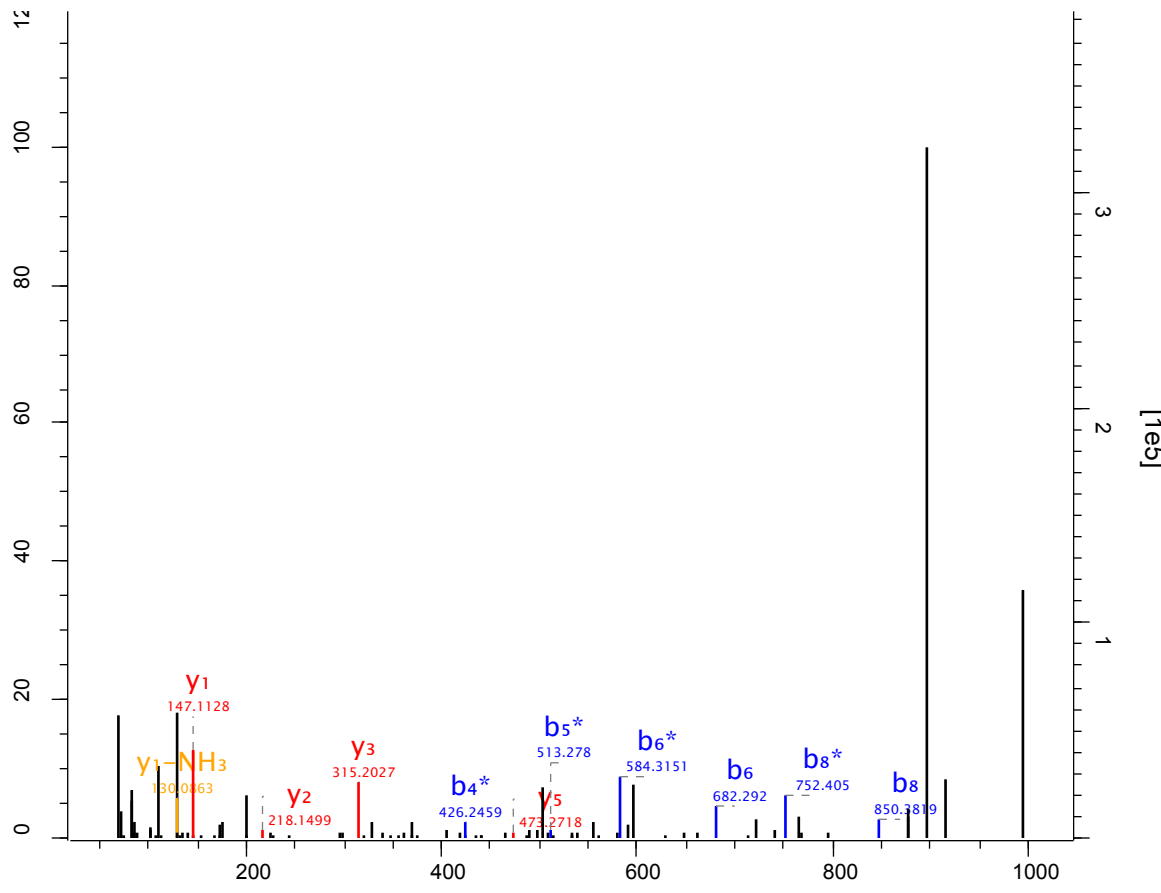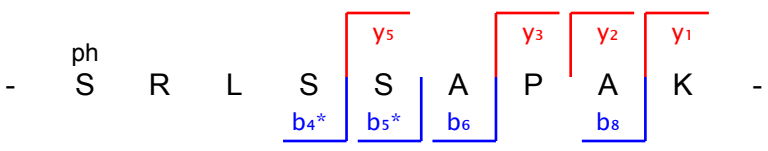

Raw file 18\_25 Scan 13036 Method FTMS; HCD Score 50.75 m/z 1002.36

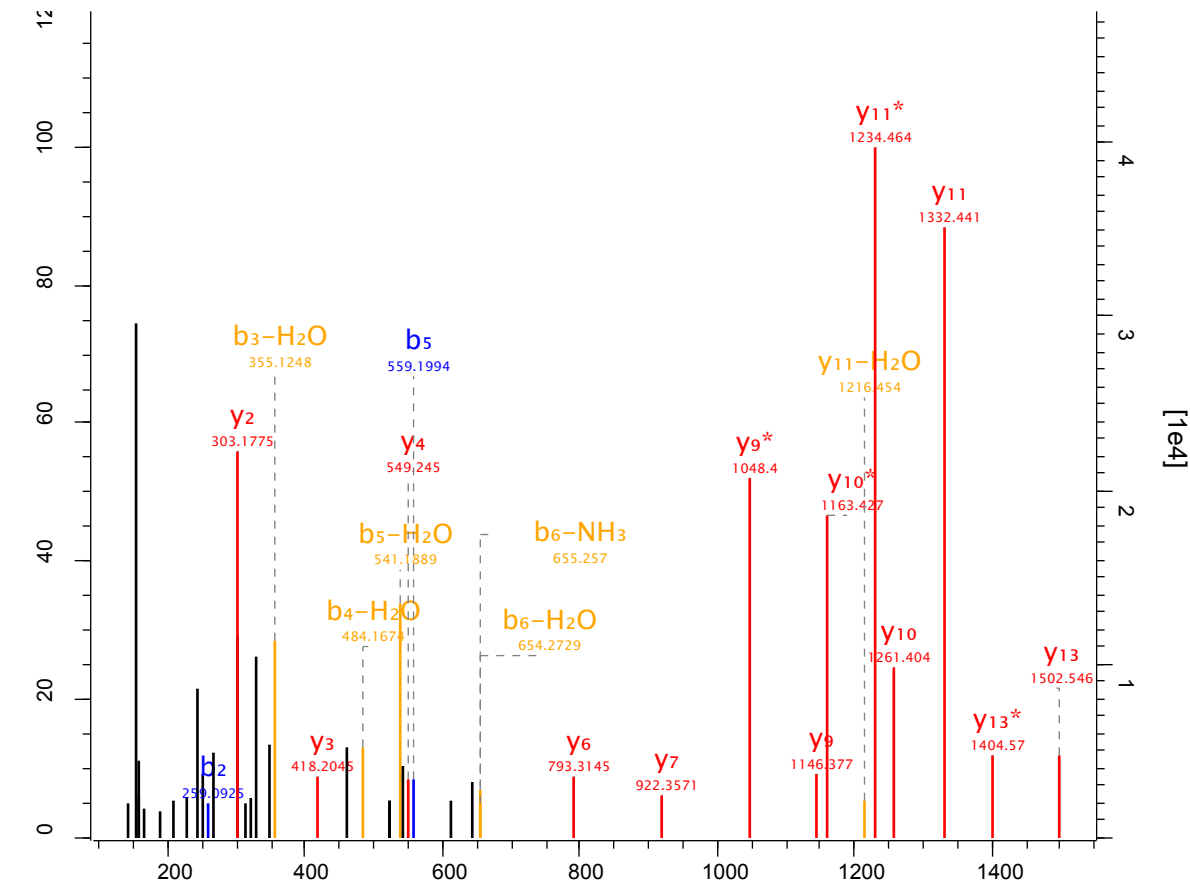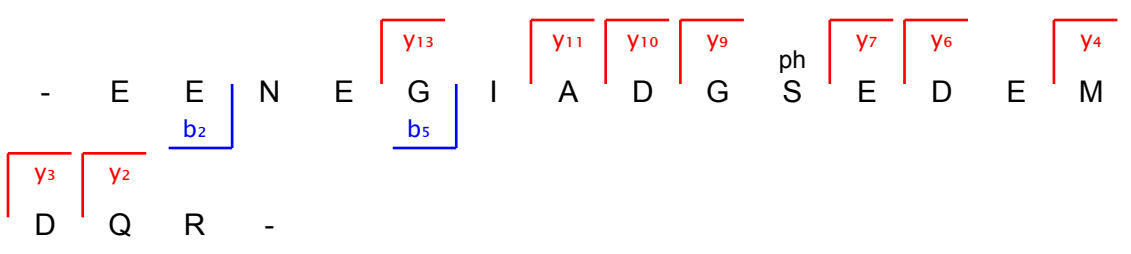

| Raw file | Scan | Method    | Score | m/z    |
|----------|------|-----------|-------|--------|
| 18_25    | 1322 | FTMS; HCD | 49.3  | 409.86 |

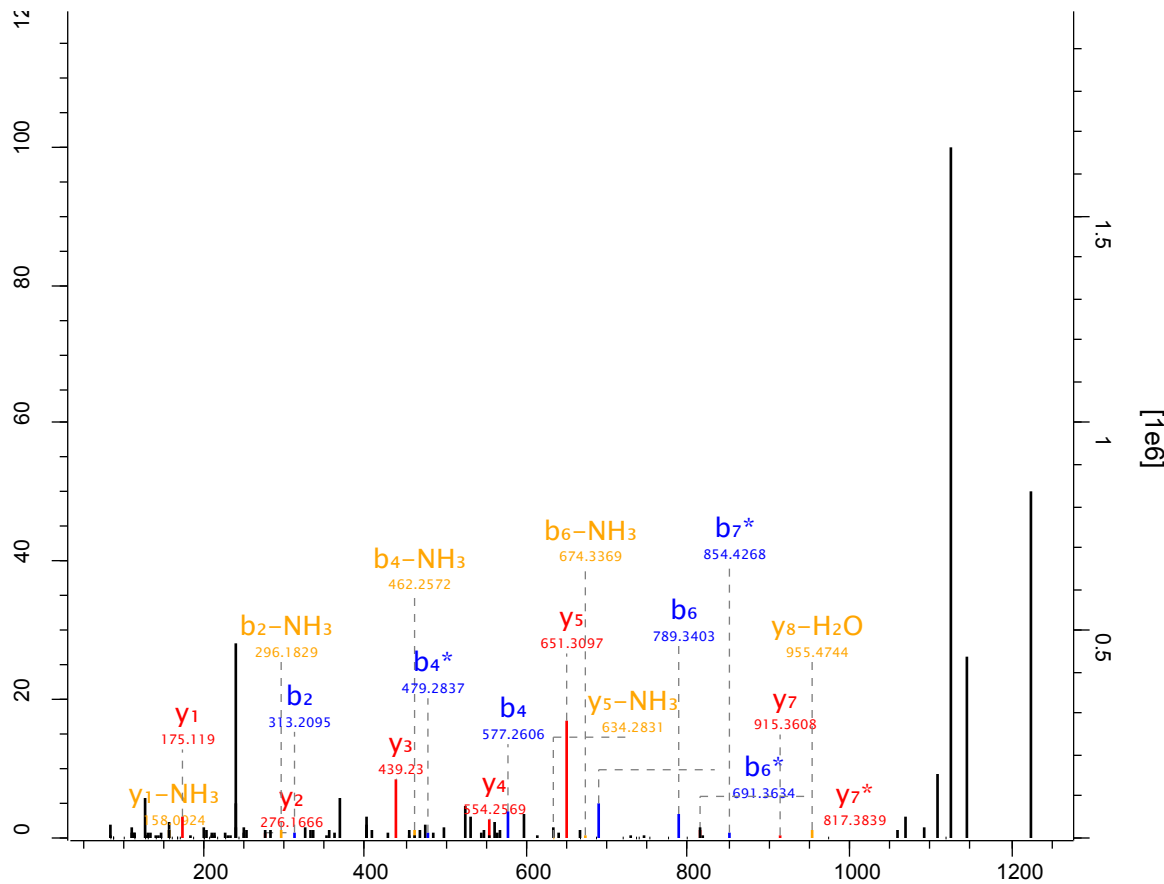

- R R P ph S P D Y T R -

y7
y5
y4
y3
y2
y1

b2
b4
b6
b7\*

Raw file Scan Method Score m/z  
 18\_25 13749 FTMS; HCD 97.63 890.41

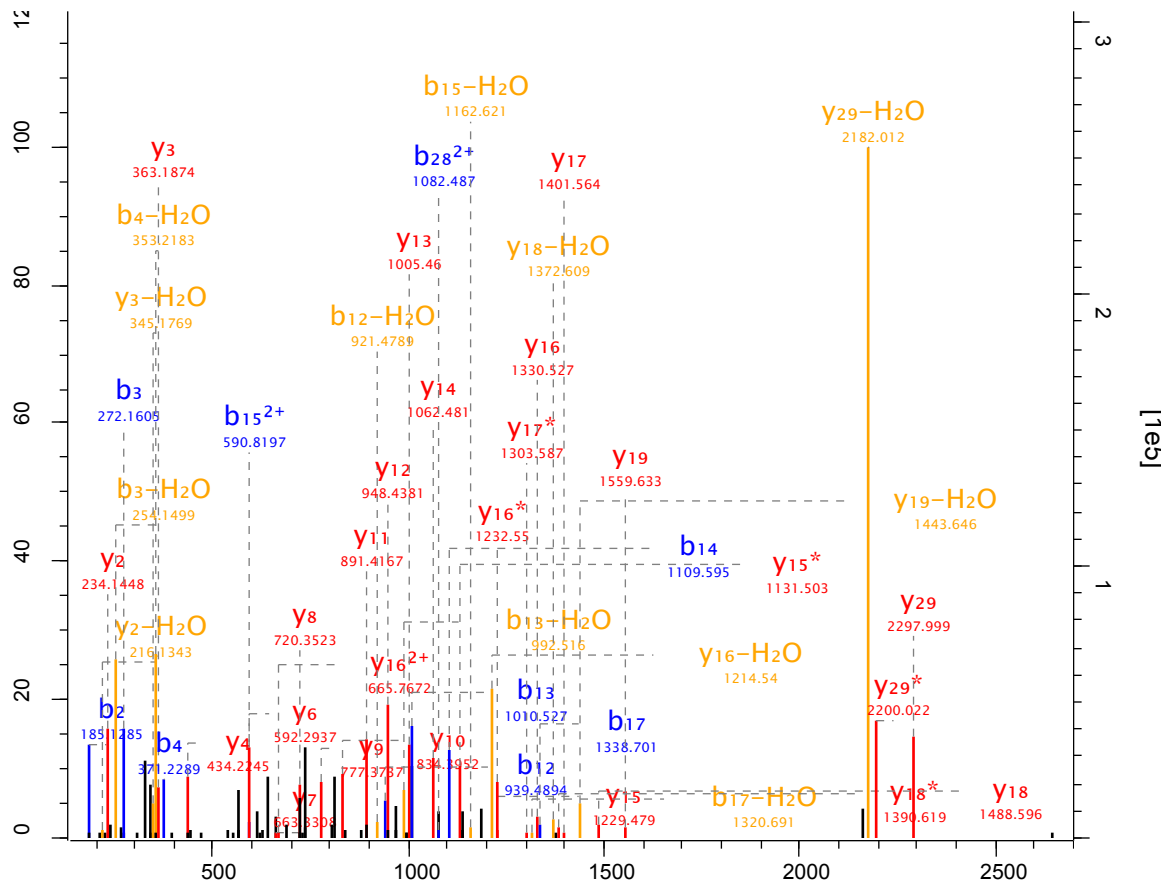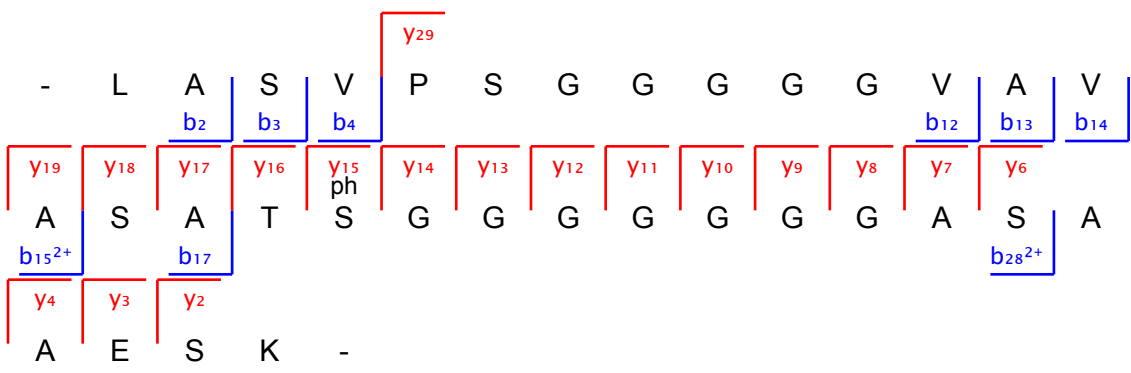

Raw file Scan Method Score m/z  
 18\_25 14341 FTMS; HCD 54.58 893.75

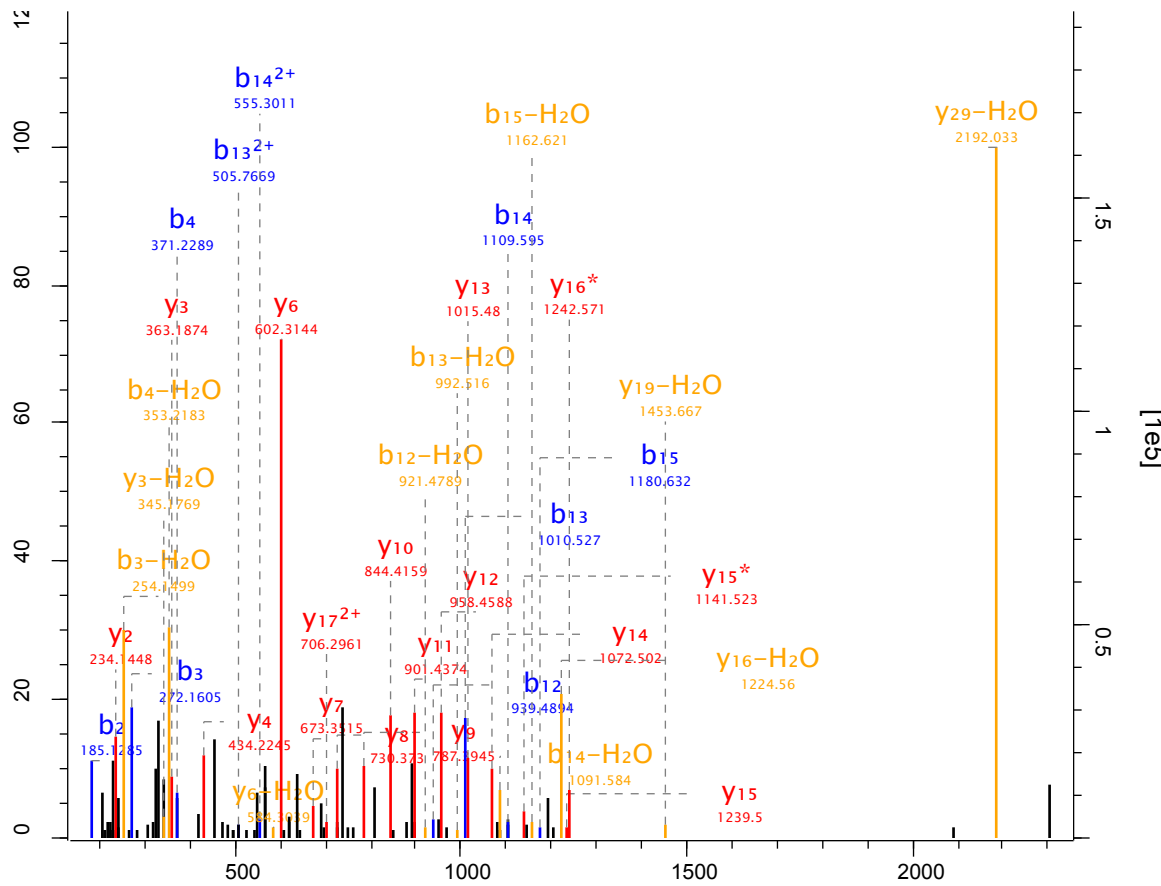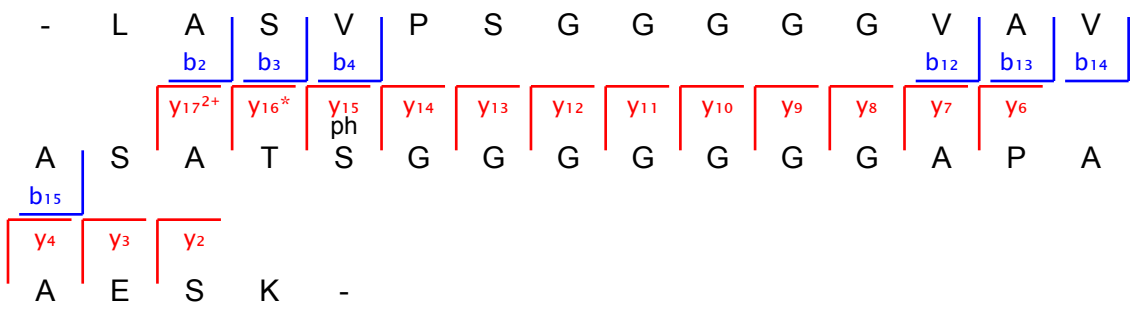

Raw file Scan Method Score m/z  
 18\_25 16340 FTMS; HCD 55.72 456.23

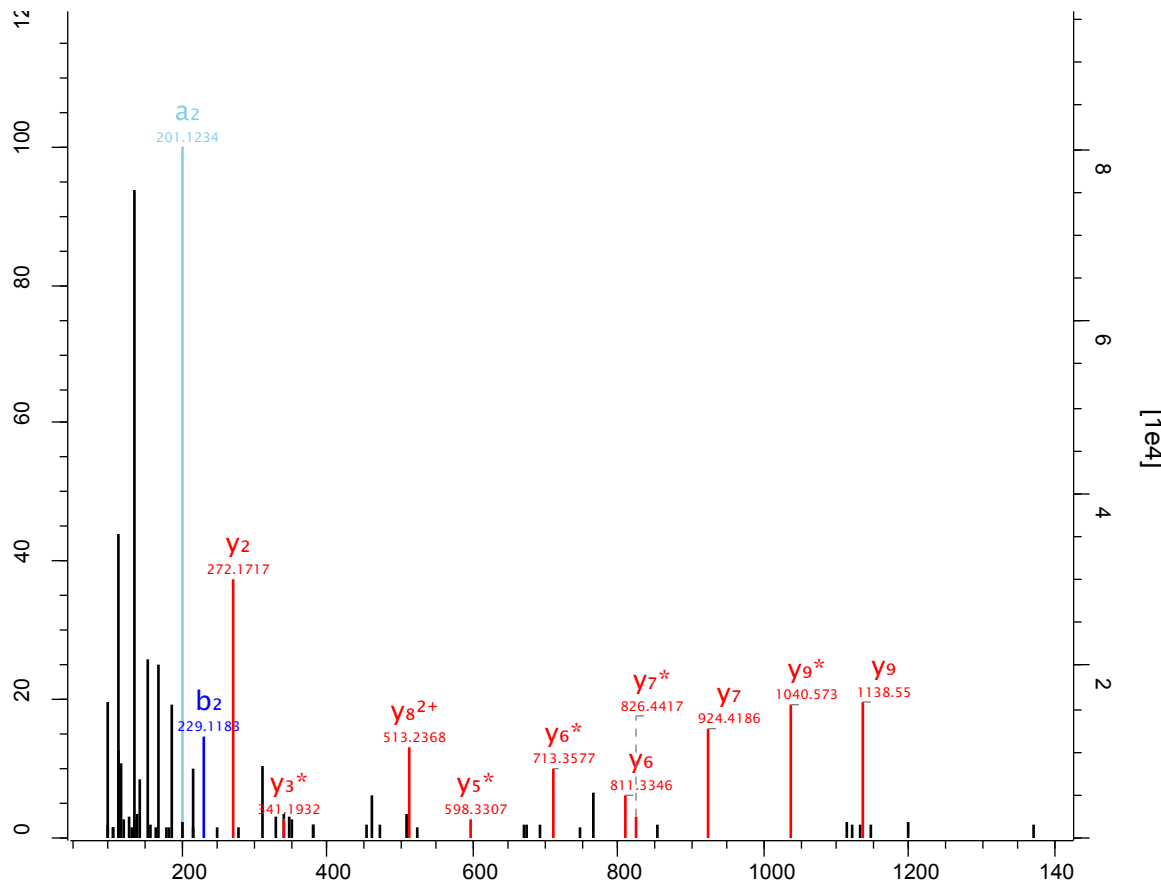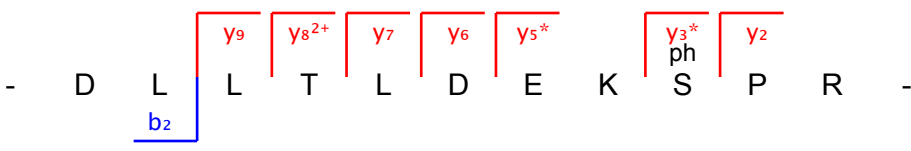

Raw file Scan Method Score m/z  
 18\_25 17162 FTMS; HCD 83.5 537.7

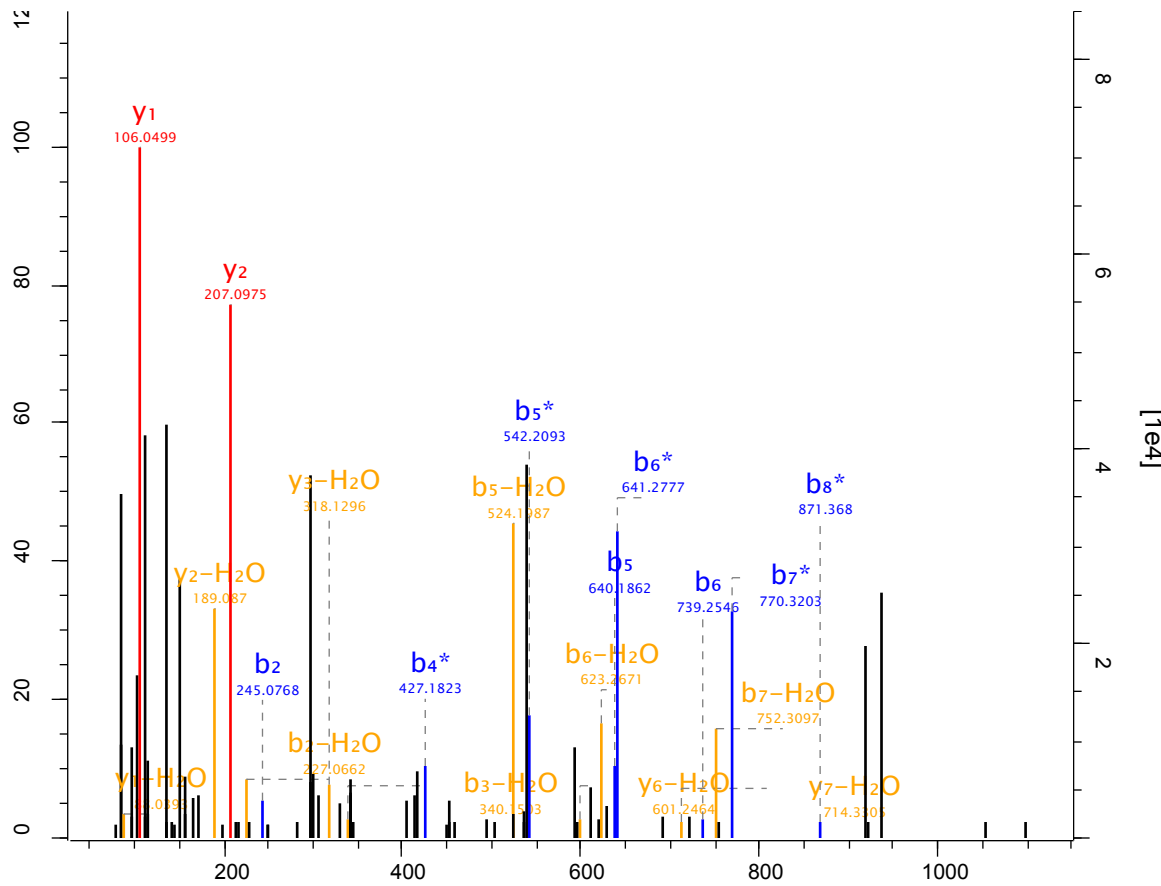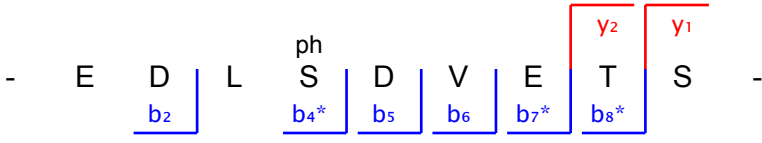





Raw file Scan Method Score m/z  
 18\_25 17661 FTMS; HCD 67.5 775.35

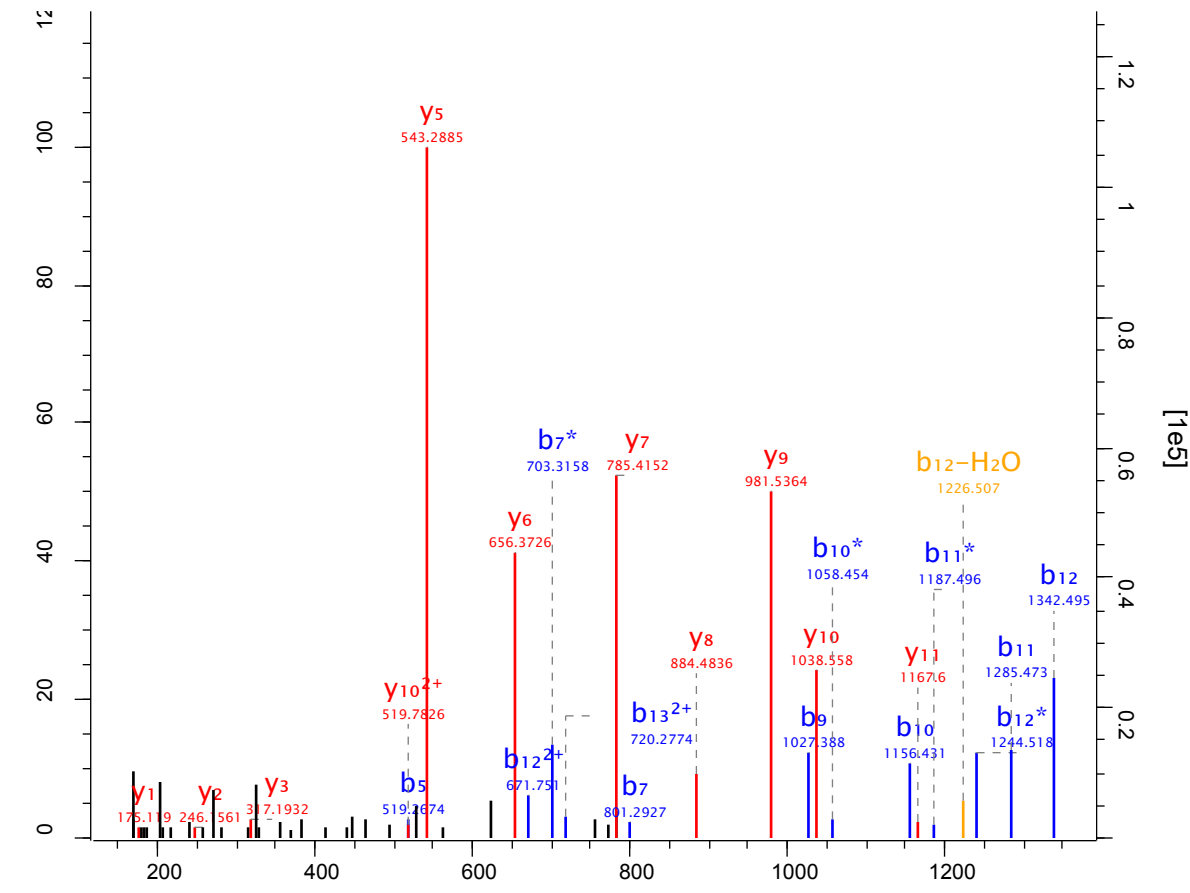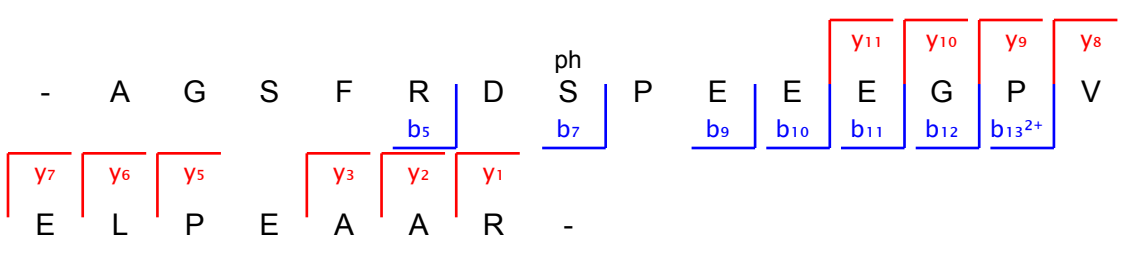

Raw file: 18\_25 Scan: 18155 Method: FTMS; HCD Score: 90.69 m/z: 809.31

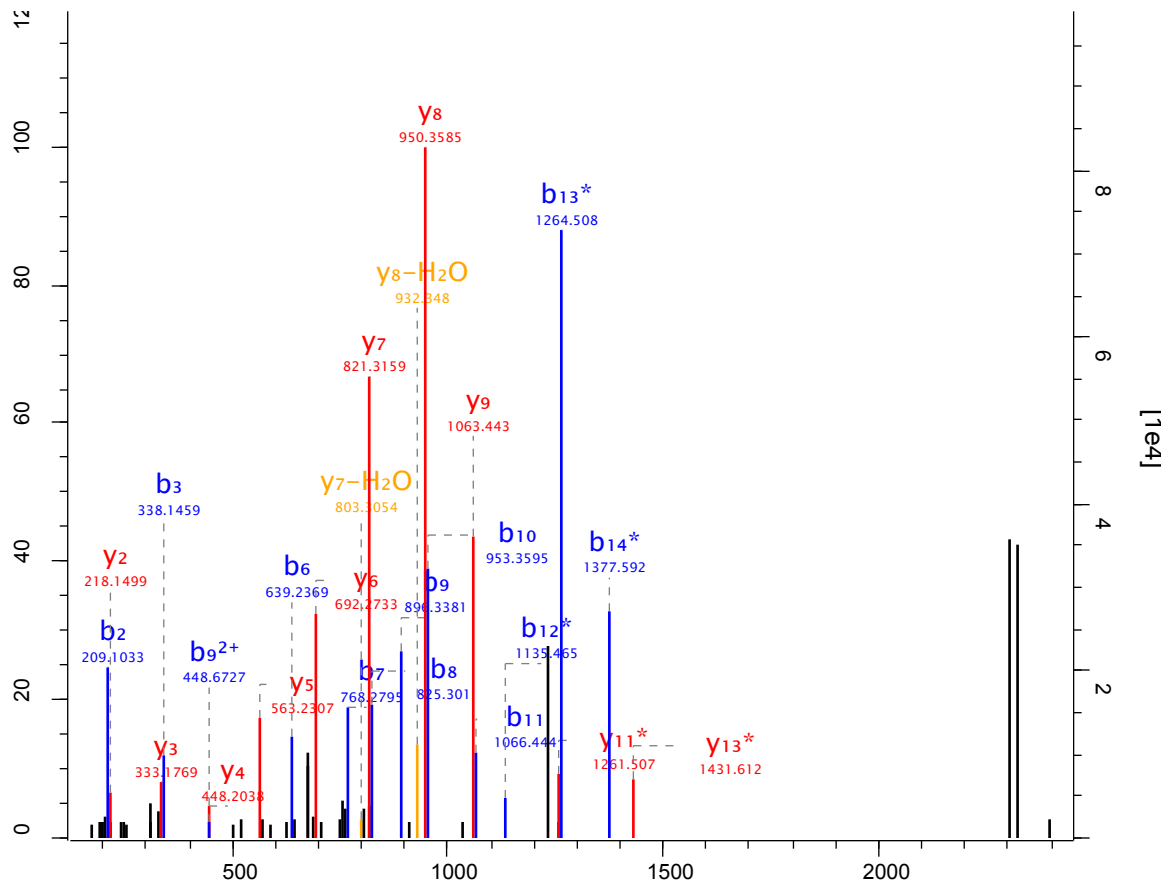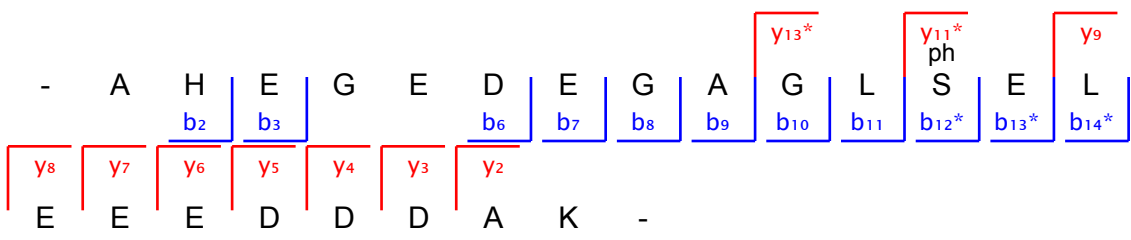

Raw file Scan Method Score m/z  
 18\_25 19379 FTMS; HCD 73.17 737.34

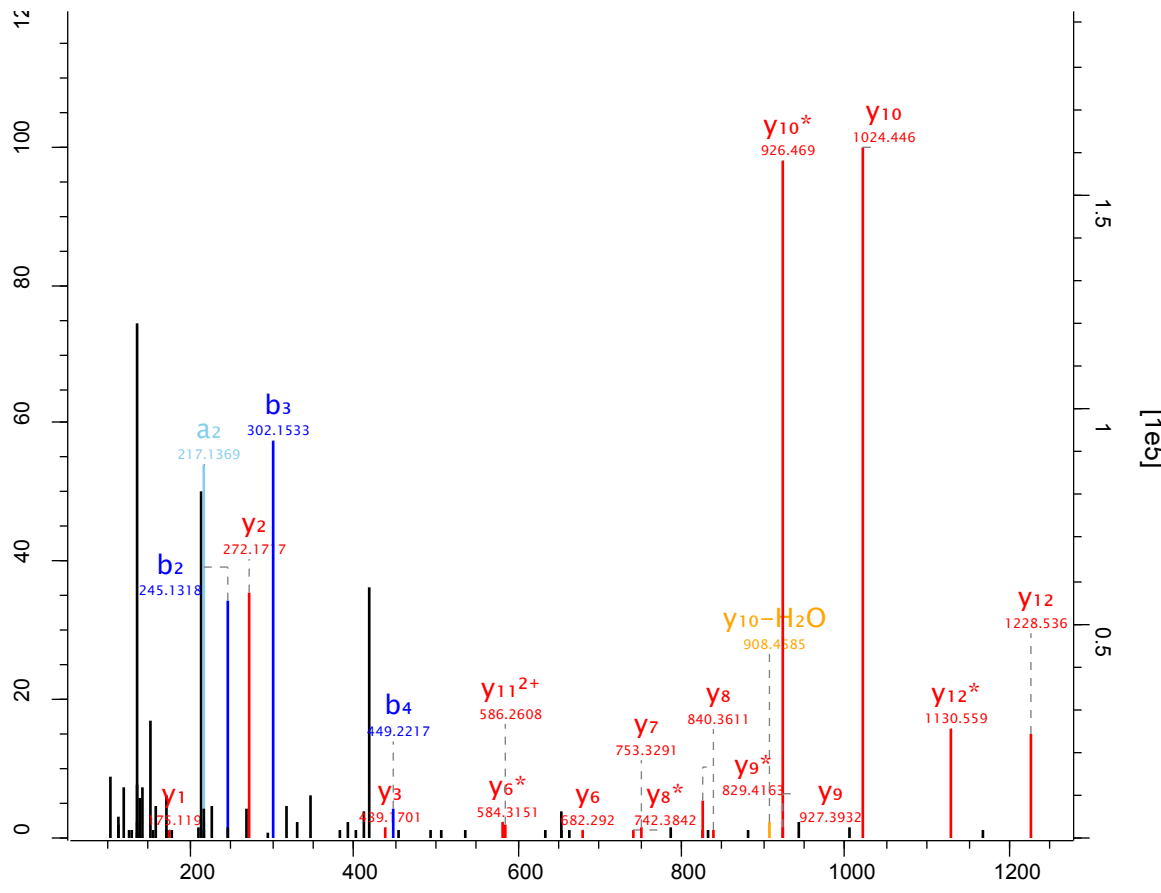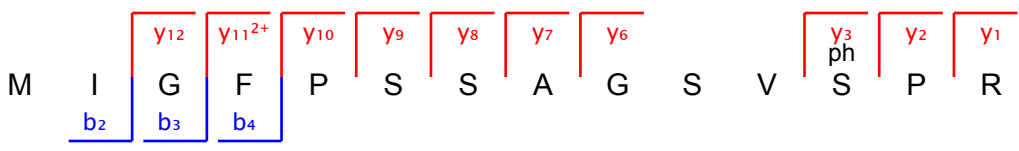

Raw file 18\_25 Scan 20335 Method FTMS; HCD Score 63.3 m/z 807.4

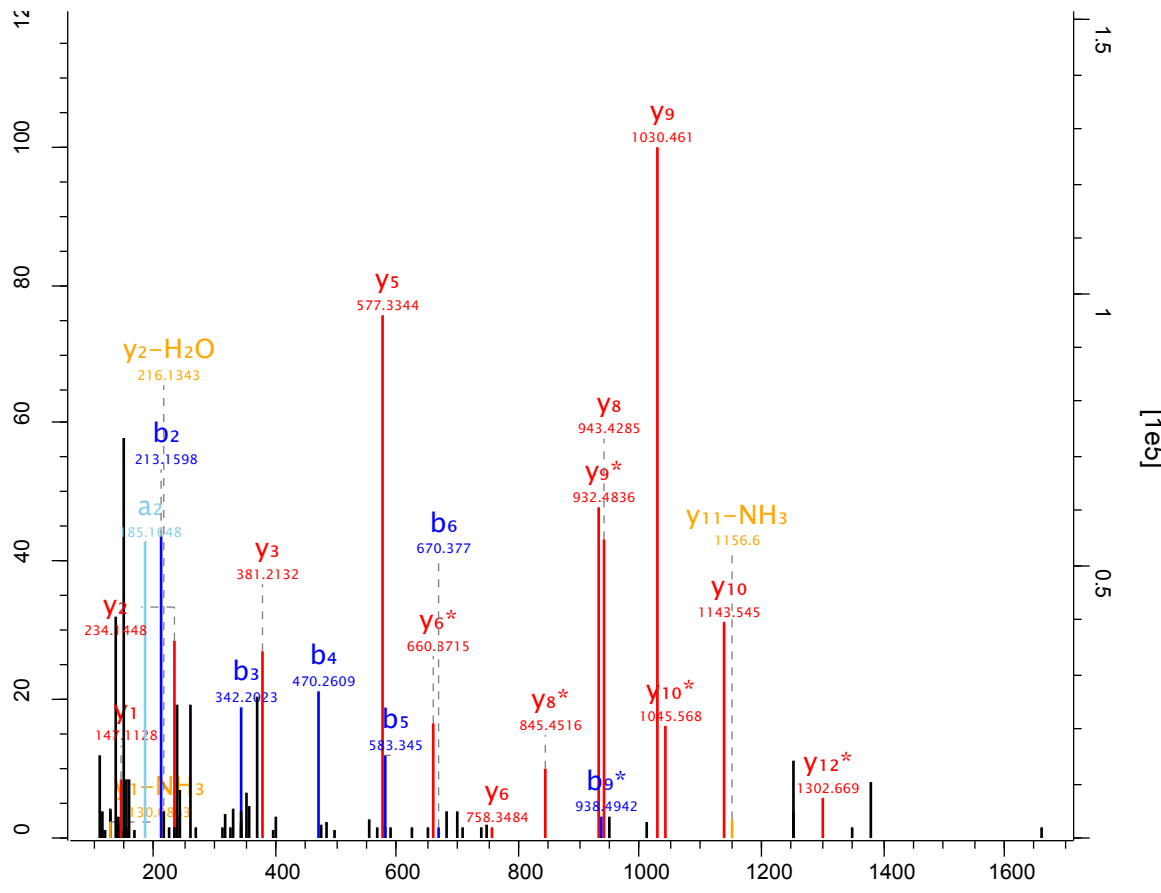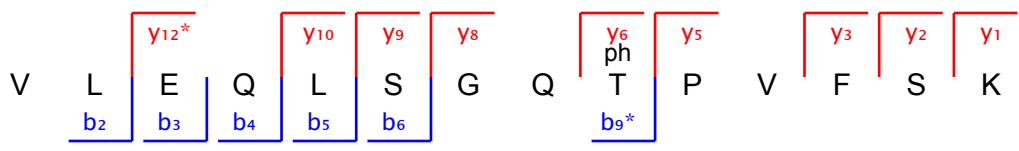

Raw file Scan Method Score m/z  
 18\_25 2037 FTMS; HCD 124.21 440.87

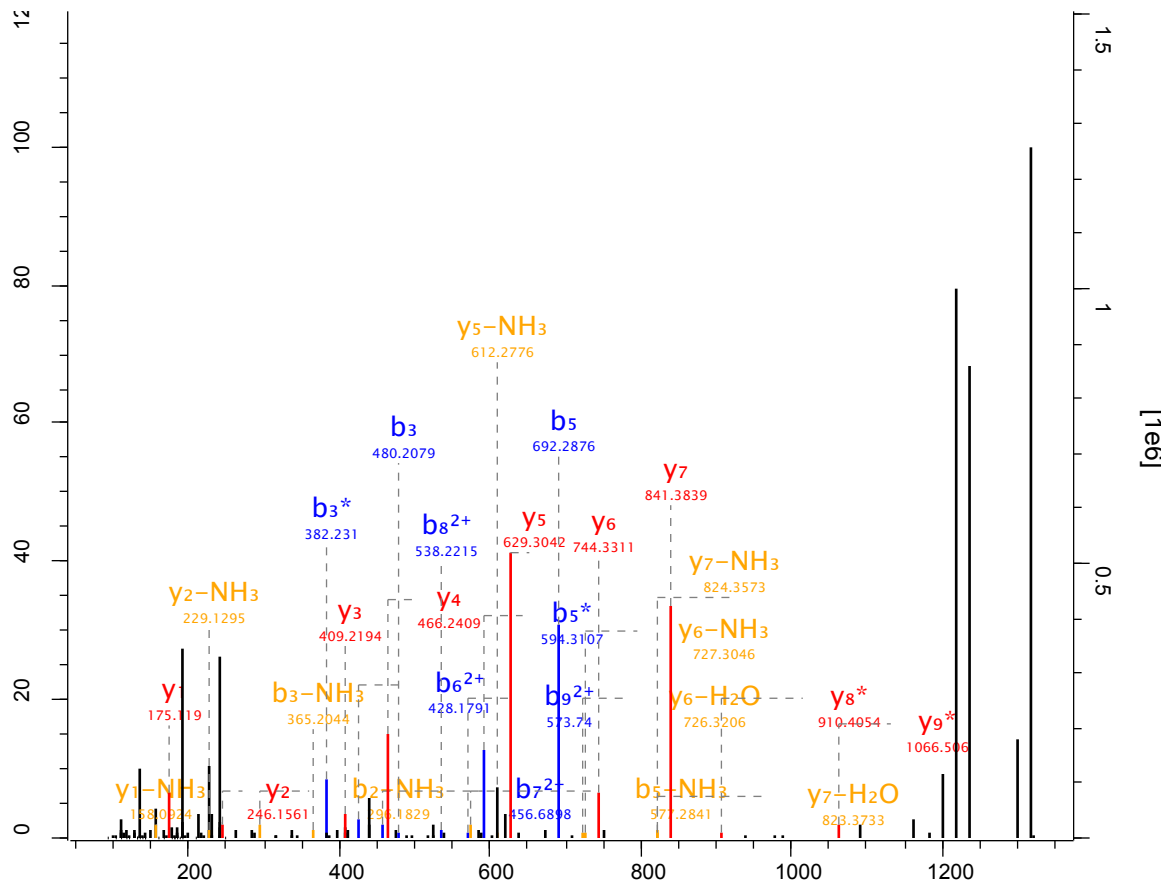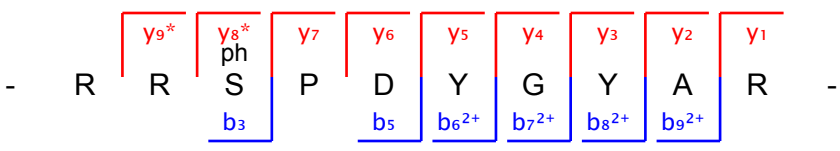

| Raw file | Scan | Method    | Score | m/z    |
|----------|------|-----------|-------|--------|
| 18_25    | 2051 | FTMS; HCD | 48.53 | 466.86 |

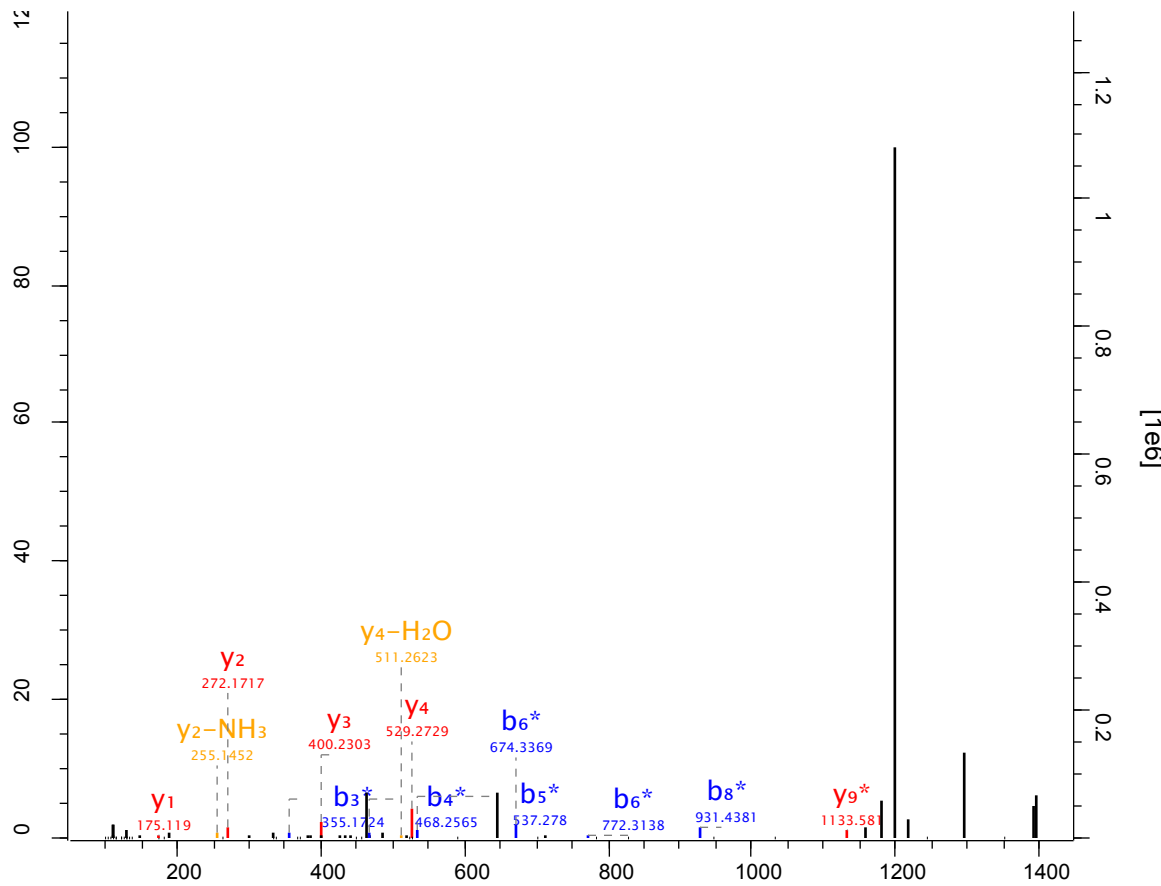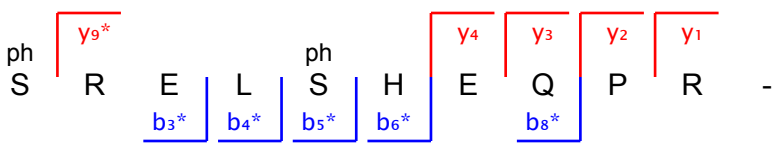

Raw file Scan Method Score m/z  
 18\_25 2302 FTMS; HCD 89.47 448.19

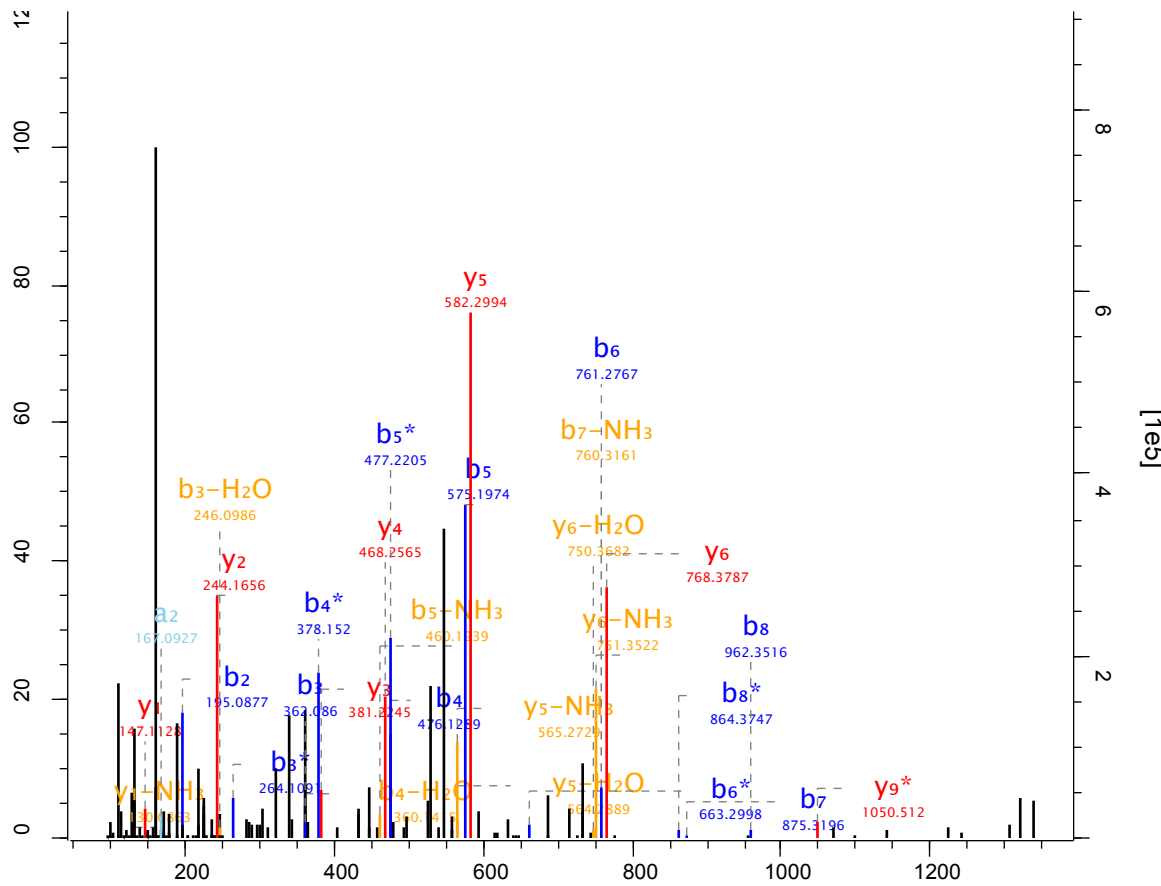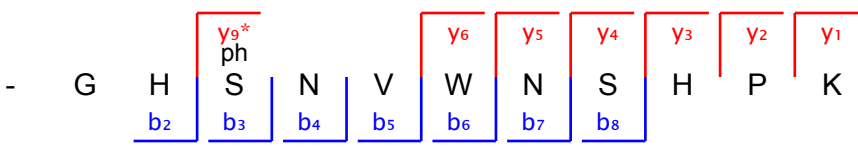



Raw file Scan Method Score m/z  
 18\_25 23583 FTMS; HCD 135.94 682.76

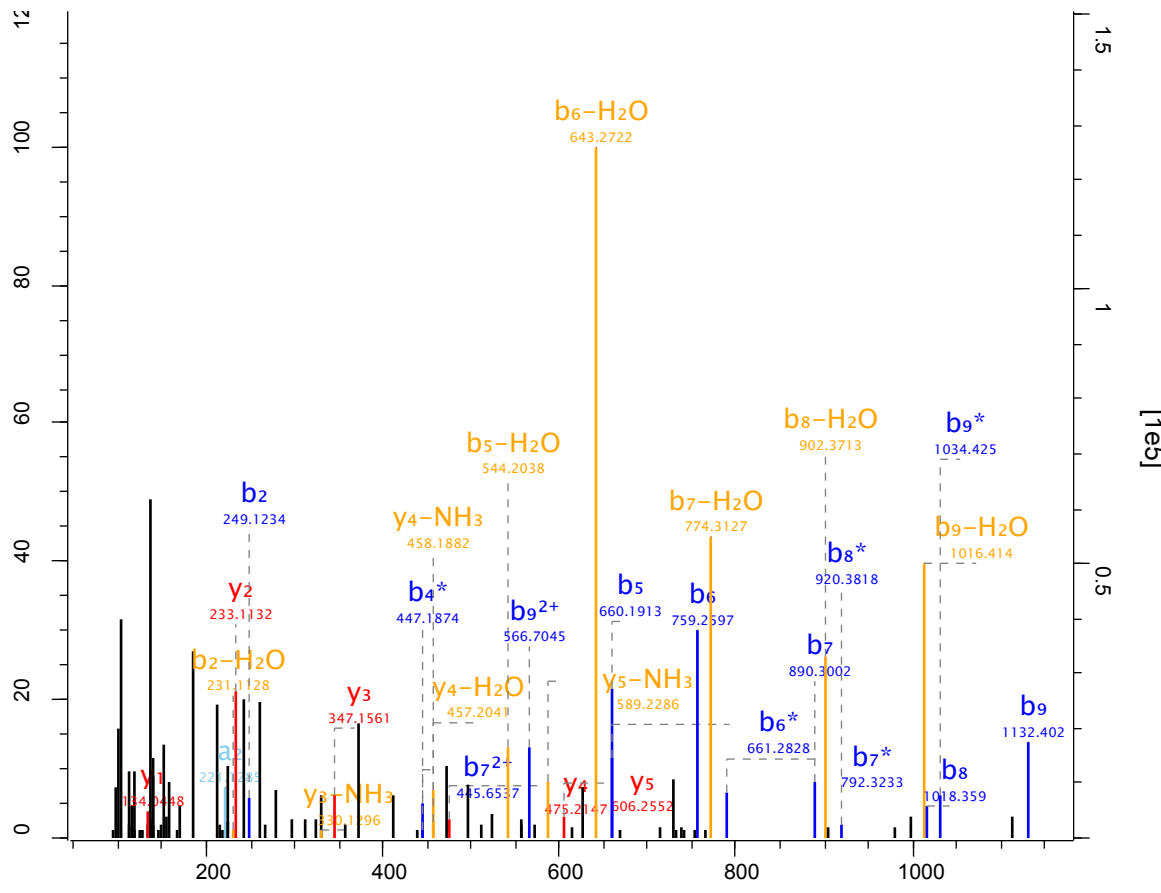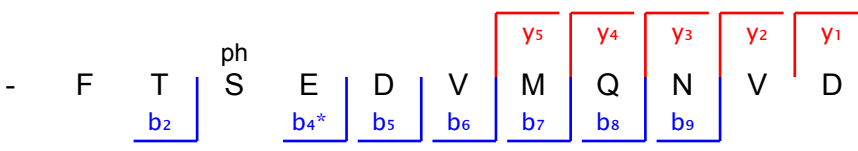

Raw file Scan Method Score m/z  
 18\_25 24219 FTMS; HCD 85.38 800.66

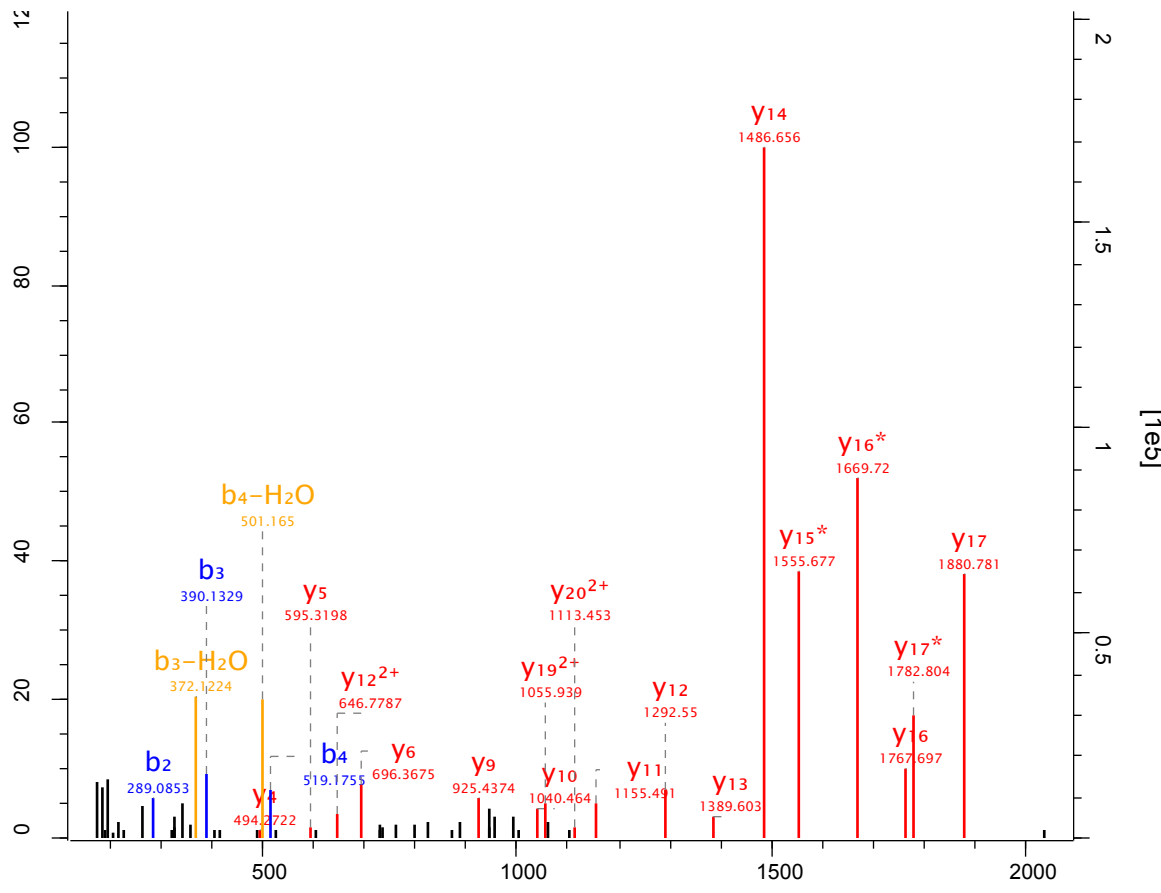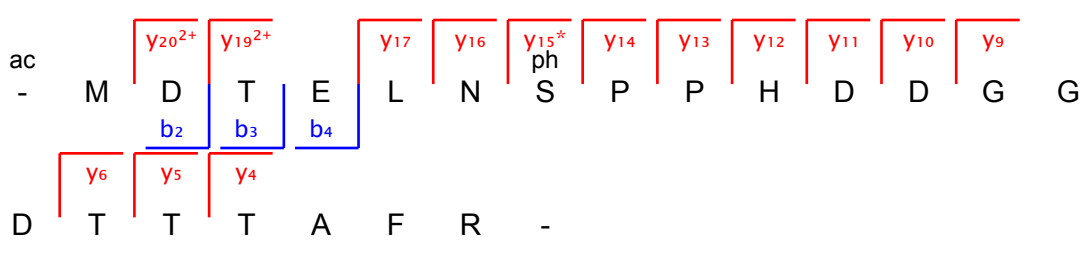

Raw file Scan Method Score m/z  
 18\_25 24314 FTMS; HCD 102.03 930.42

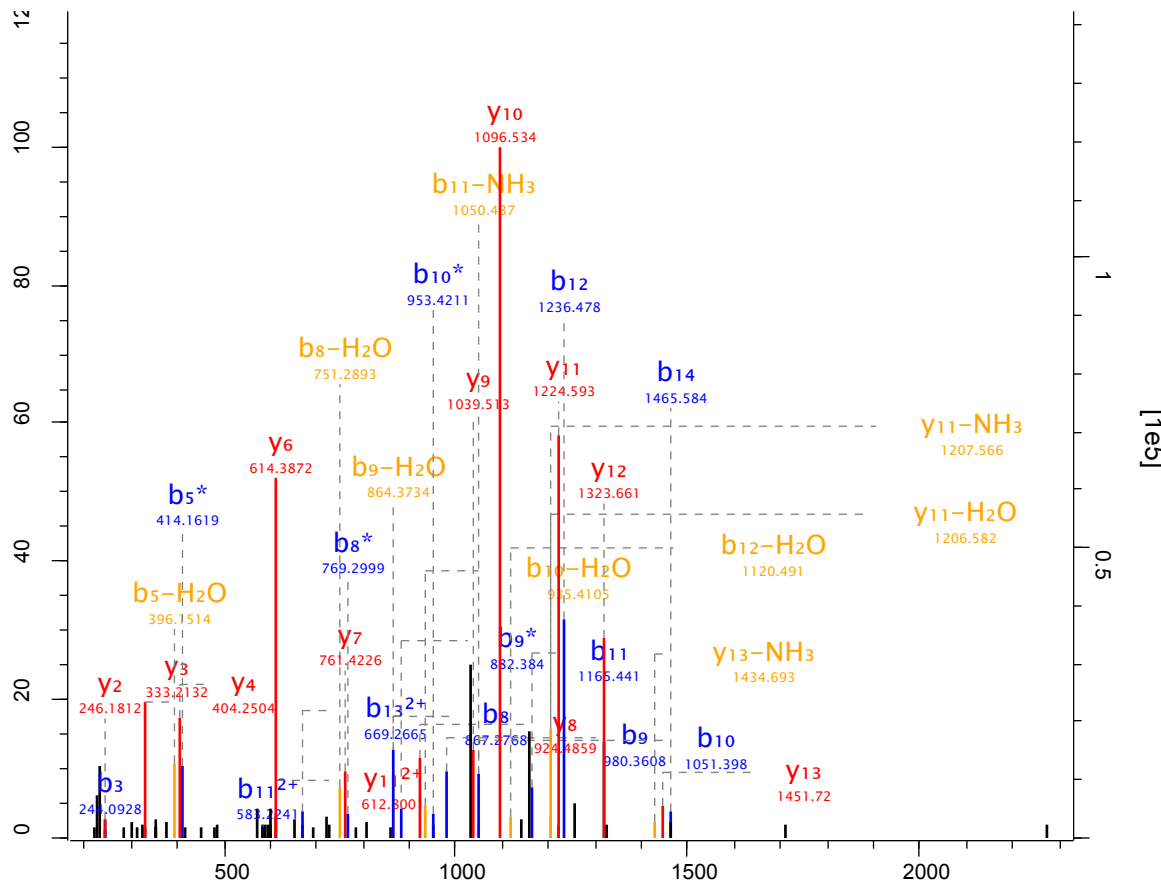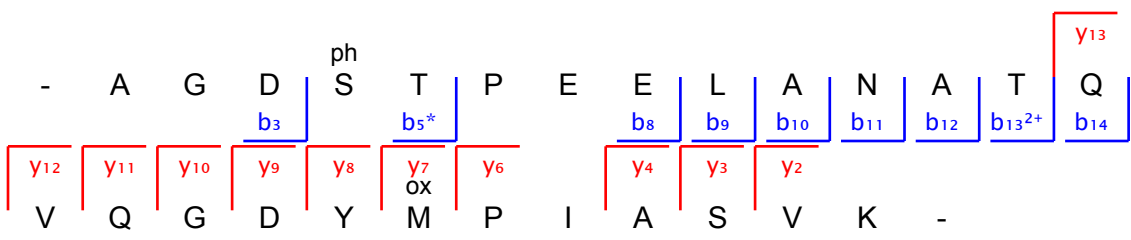

| Raw file | Scan | Method    | Score | m/z    |
|----------|------|-----------|-------|--------|
| 18_25    | 2474 | FTMS; HCD | 53.56 | 395.86 |

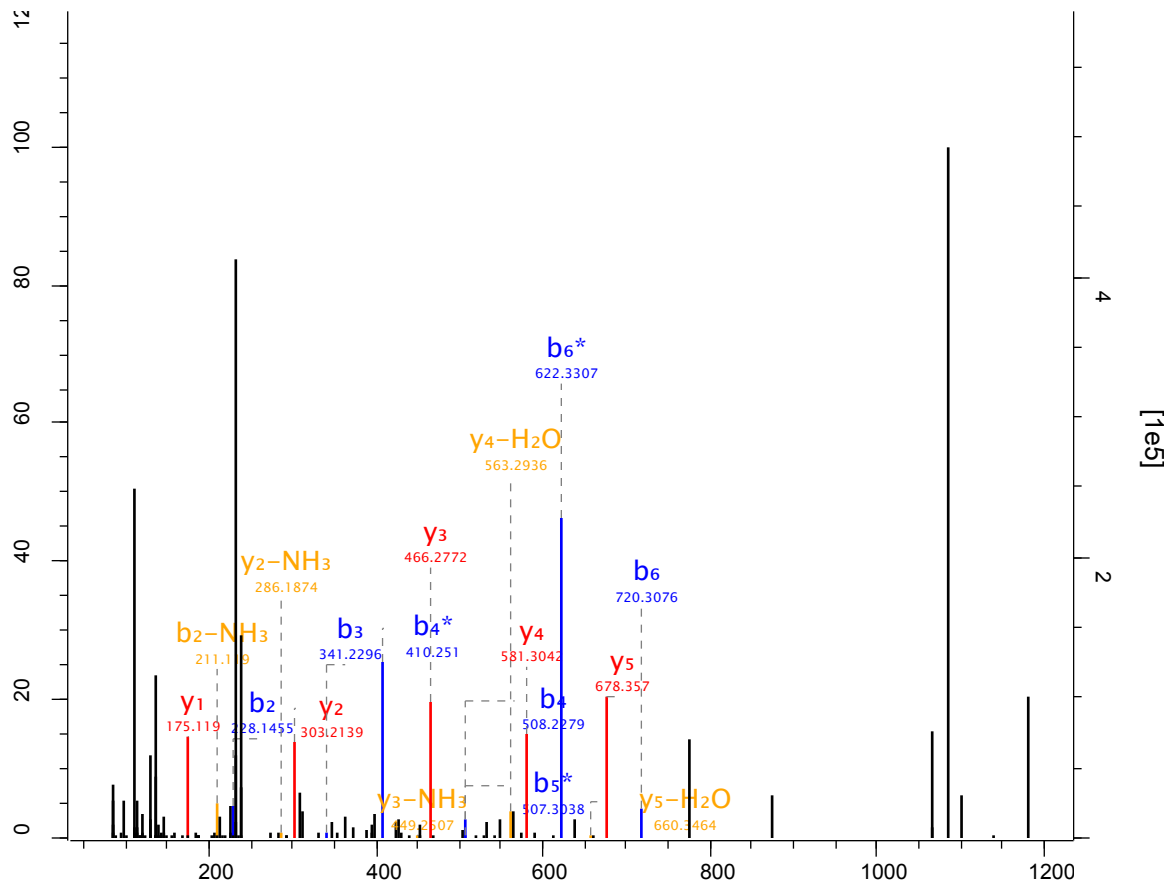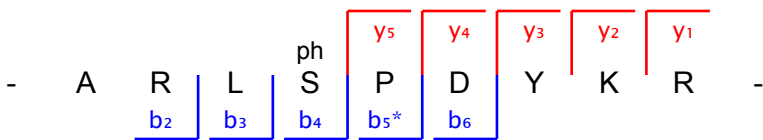

Raw file Scan Method Score m/z  
 18\_25 2544 FTMS; HCD 47.64 458.91

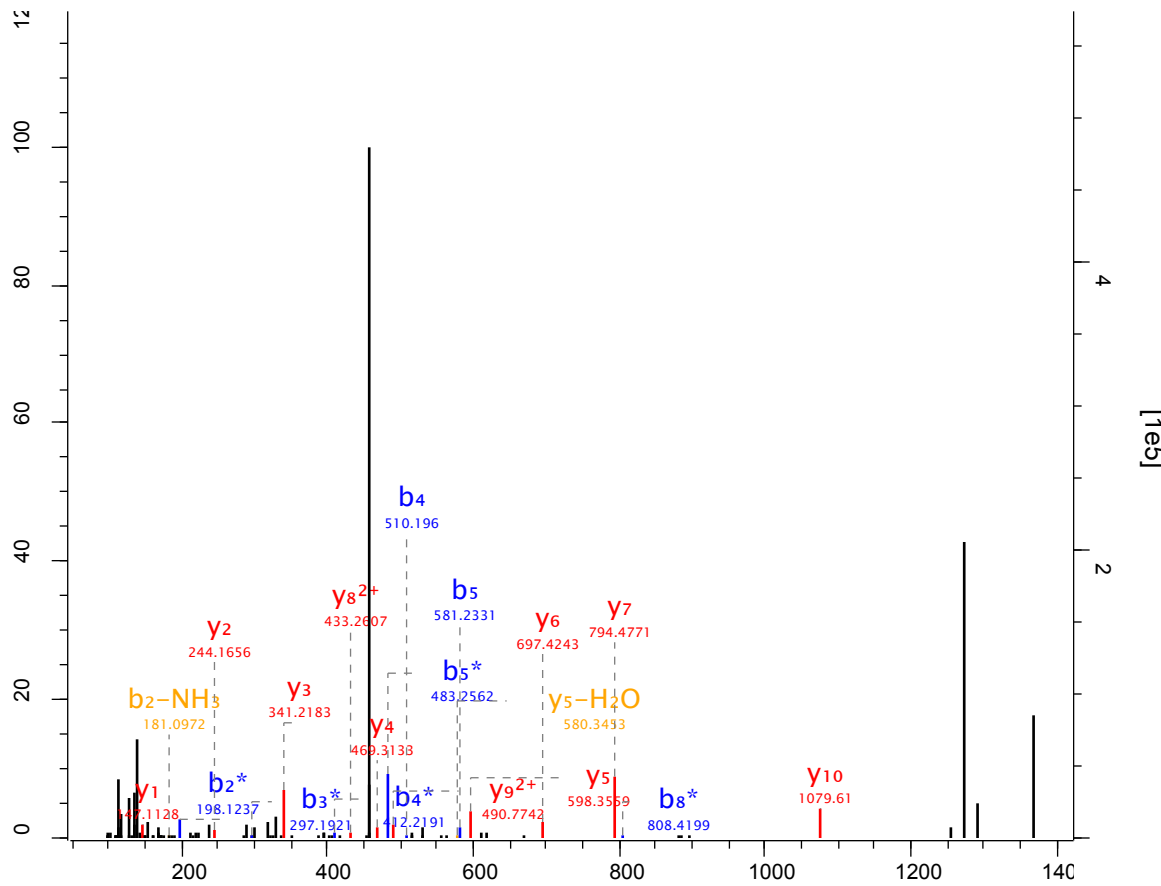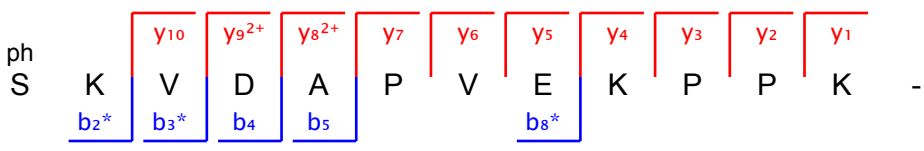

Raw file 18\_25 Scan 26030 Method FTMS; HCD Score 43.56 m/z 796.36

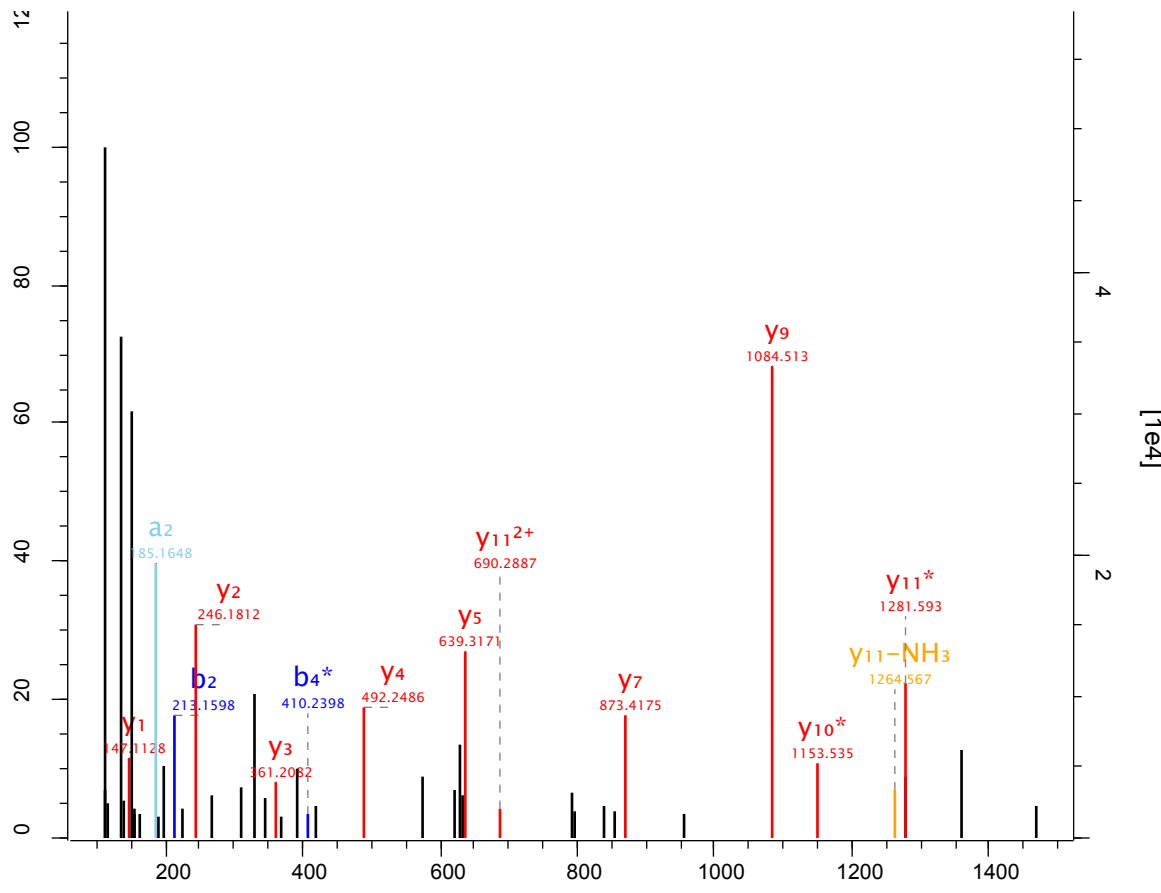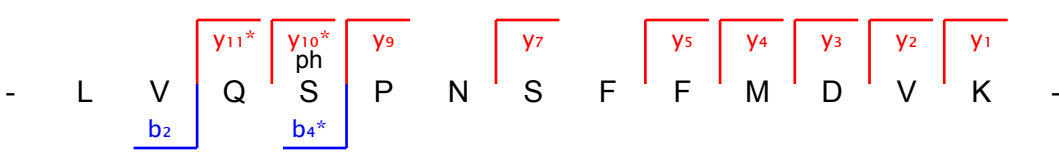

Raw file 18\_25 Scan 27531 Method FTMS; HCD Score 184.3 m/z 925.09

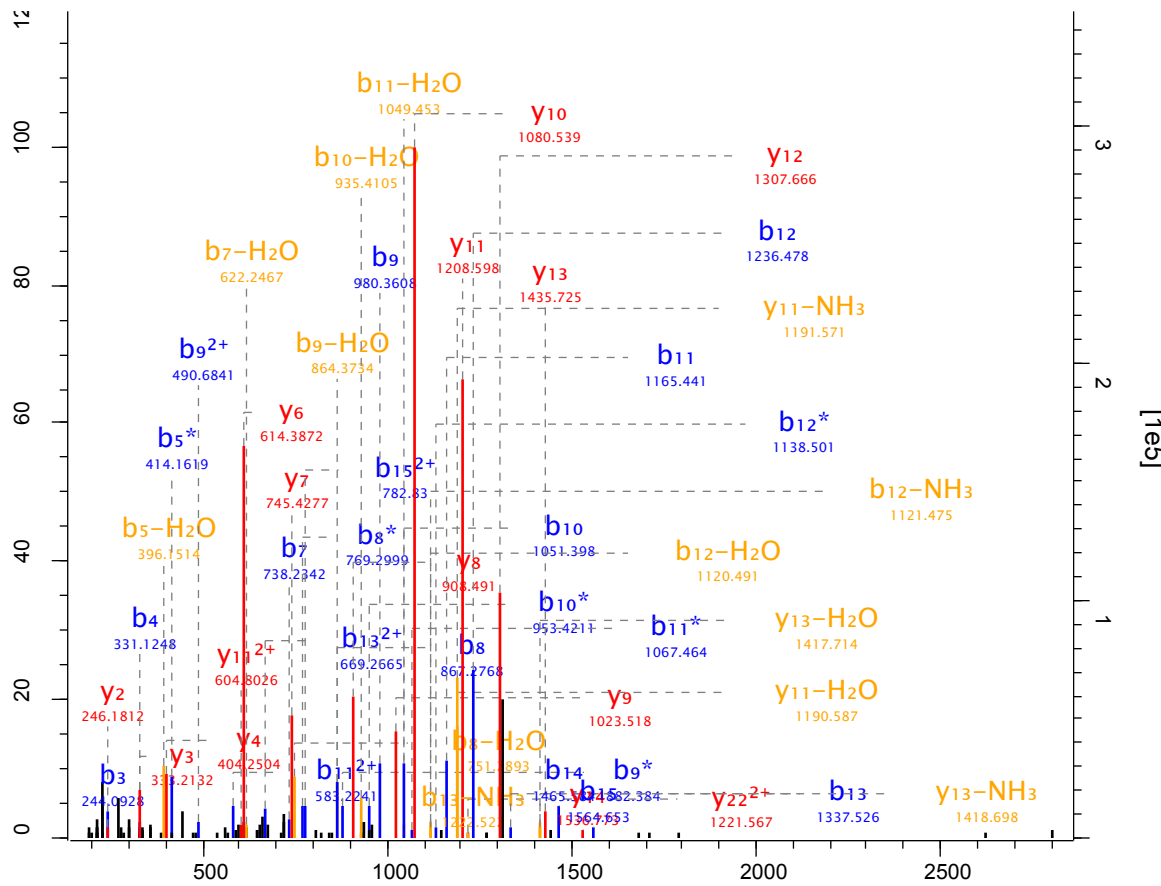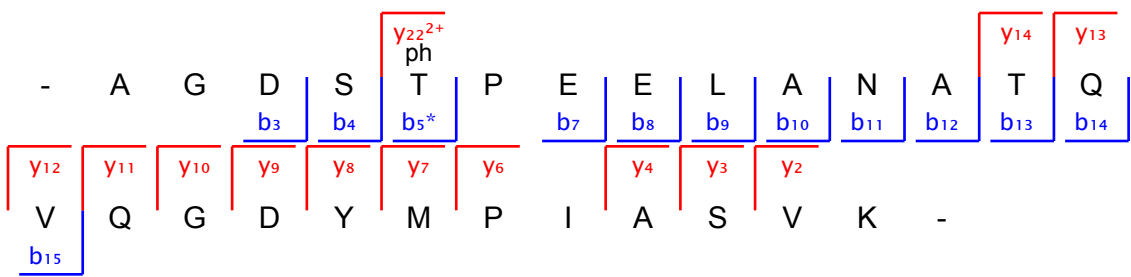

Raw file: 18\_25  
 Method: FTMS; HCD  
 Score: 181.87  
 m/z: 705.94

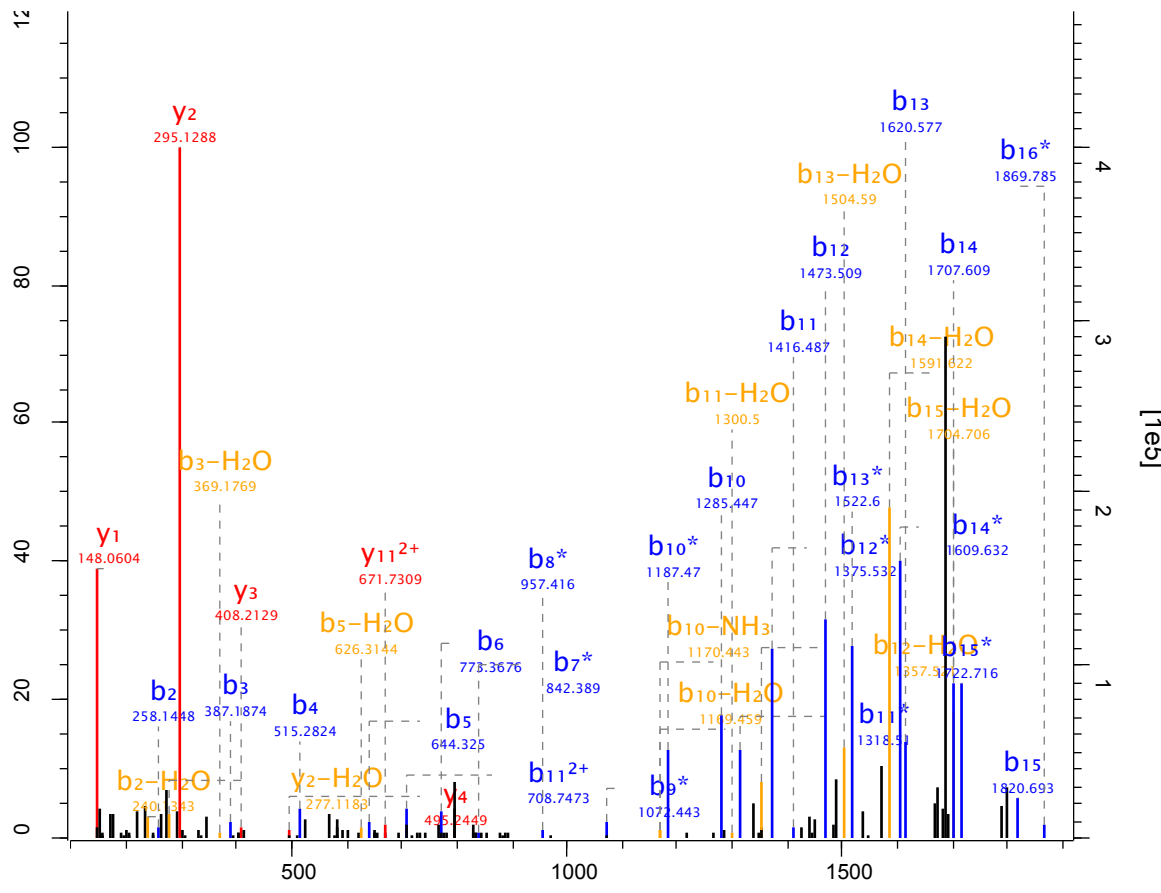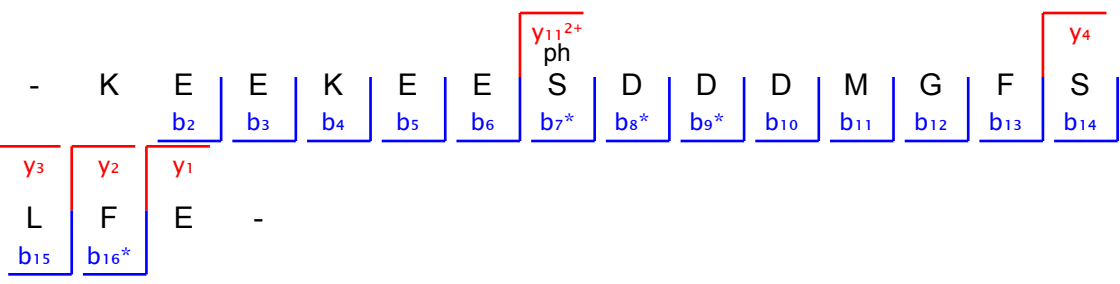



| Raw file | Scan | Method    | Score | m/z    |
|----------|------|-----------|-------|--------|
| 18_25    | 2822 | FTMS; HCD | 49.45 | 550.27 |

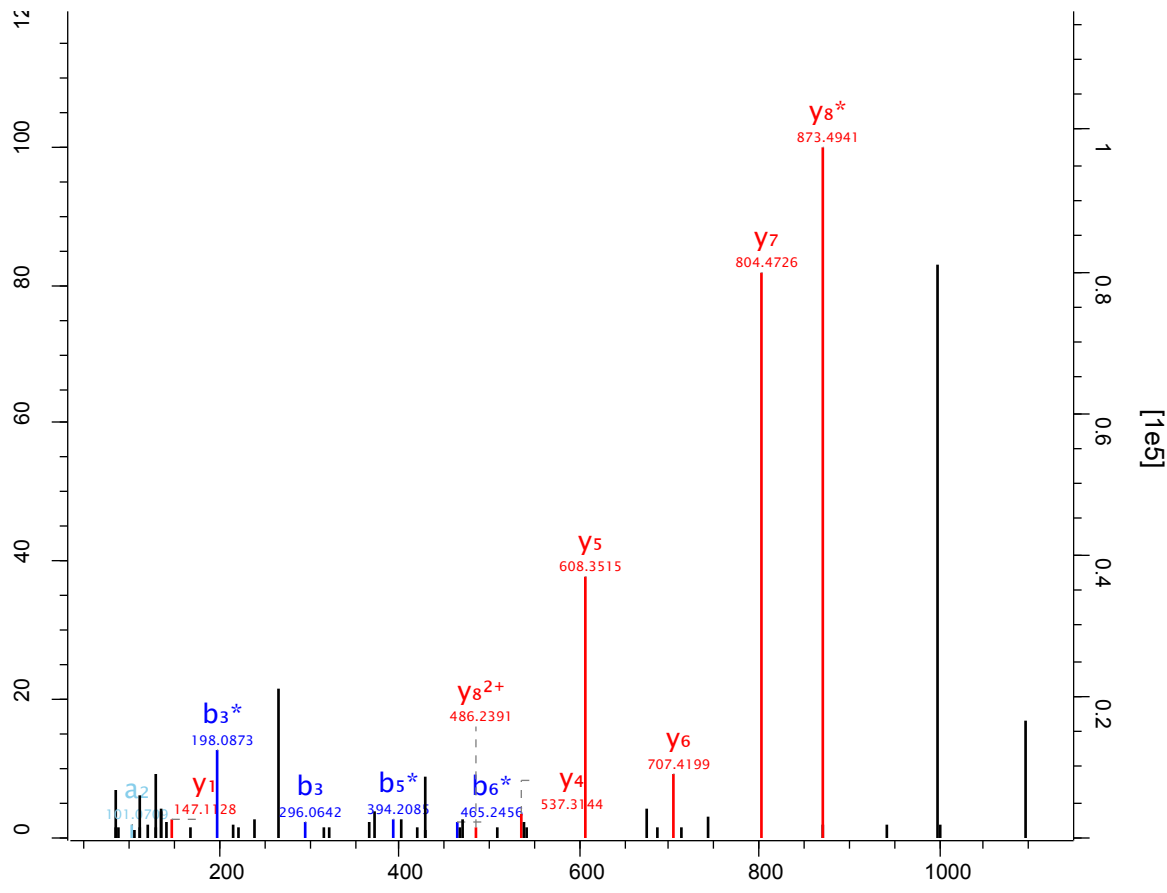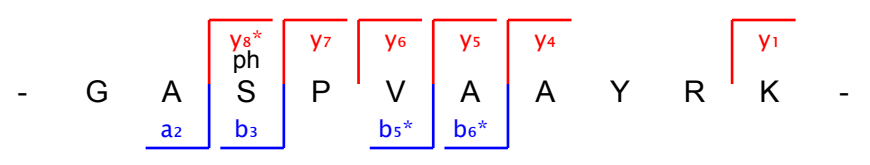



Raw file Scan Method Score m/z  
 18\_25 3055 FTMS; HCD 115.8 682.82

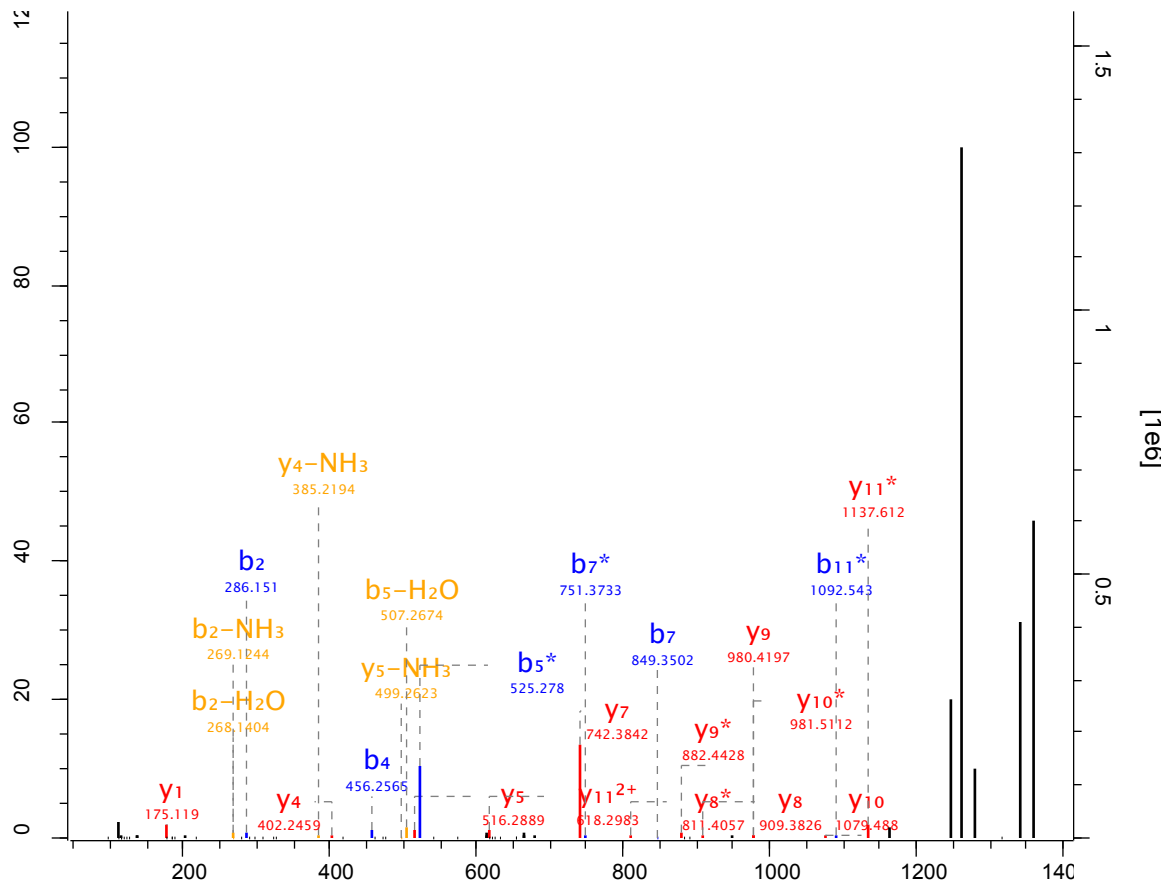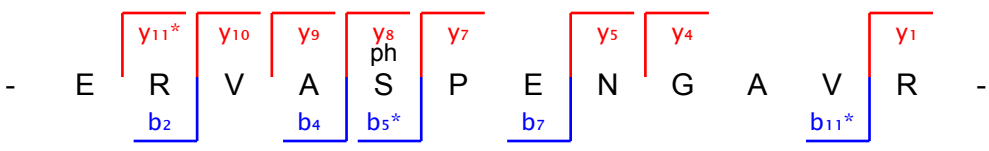

Raw file 18\_25 Scan 3170 Method FTMS; HCD Score 185.96 m/z 575.22

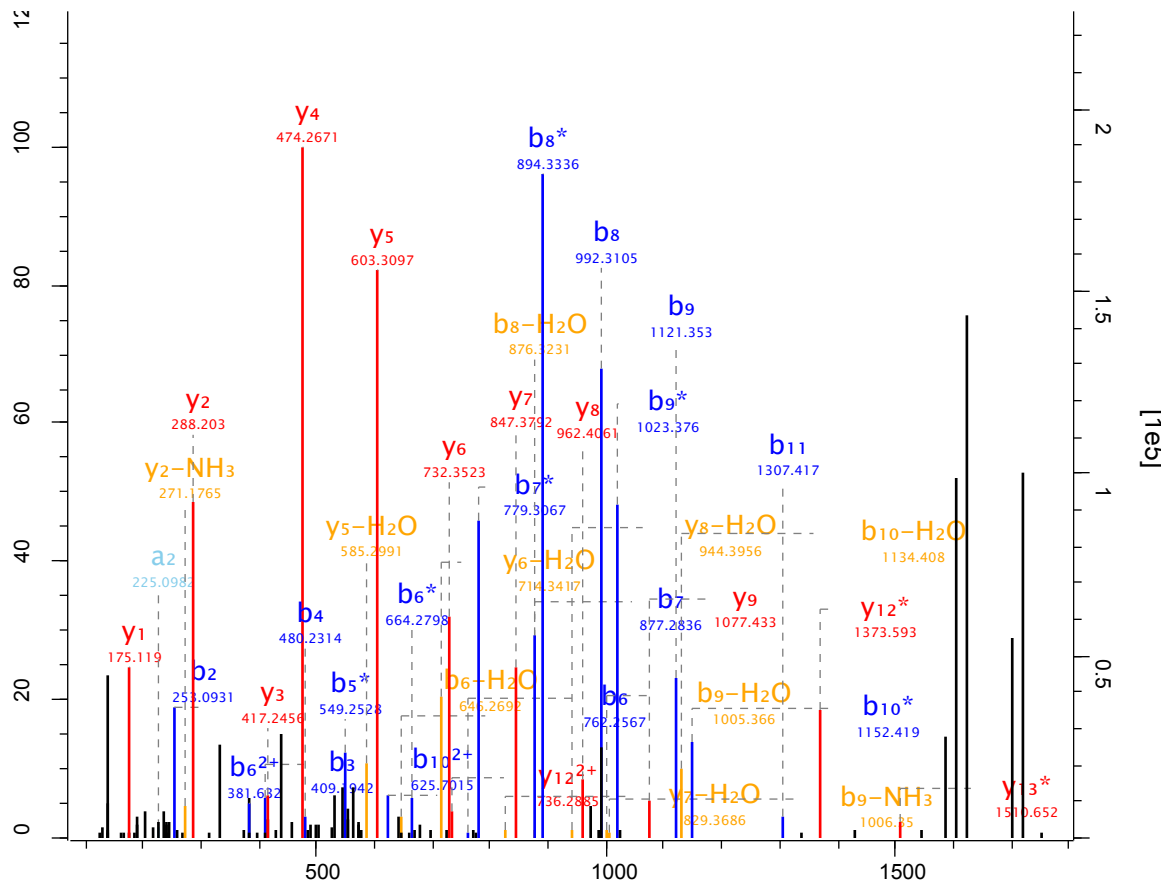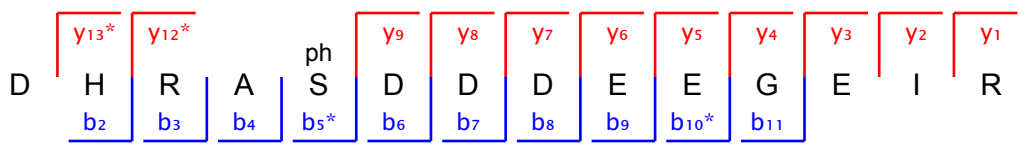

Raw file Scan Method Score m/z  
 18\_25 33180 FTMS; HCD 219.96 1001.86

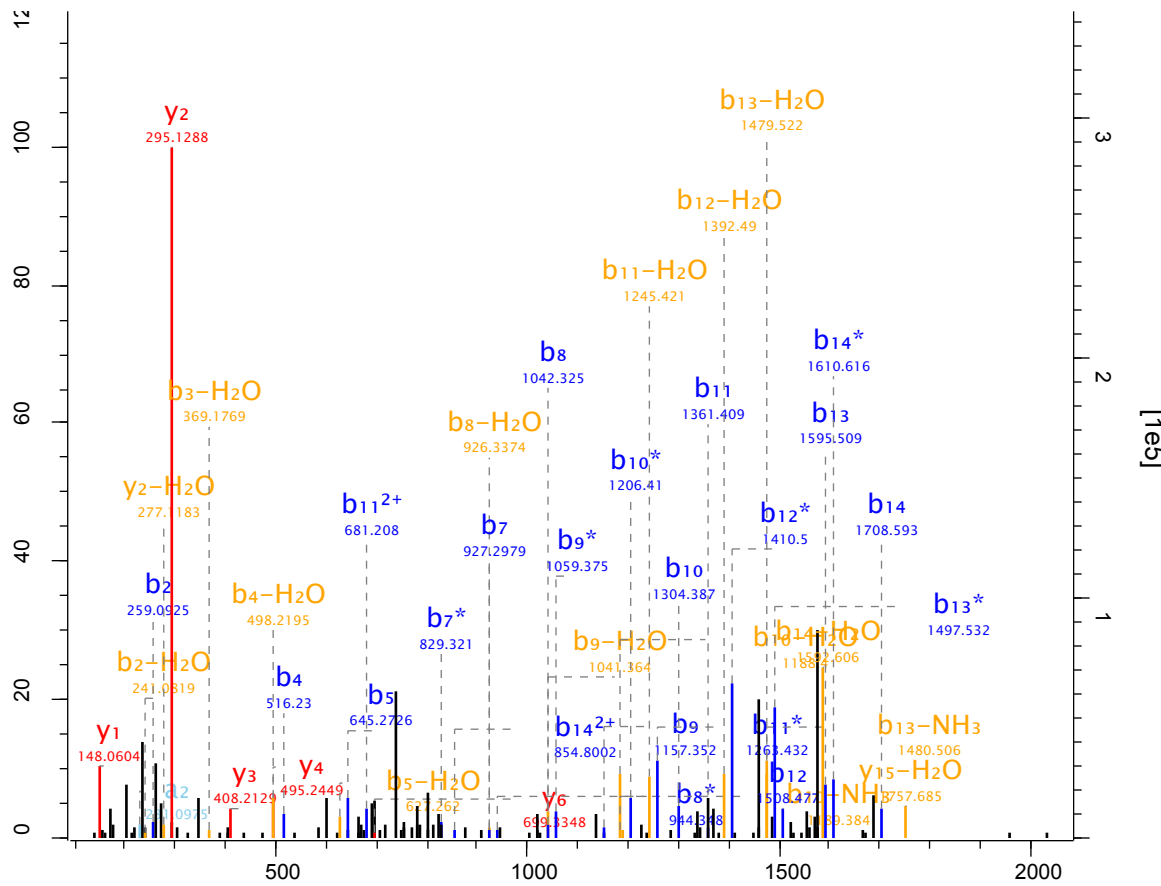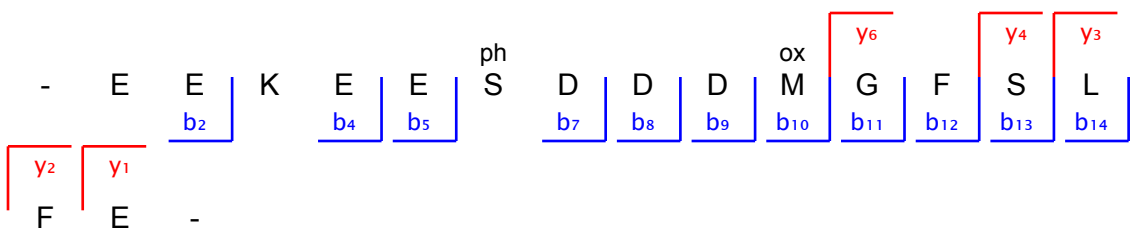

Raw file Scan Method Score m/z  
 18\_25 37044 FTMS; HCD 246.98 1011.41

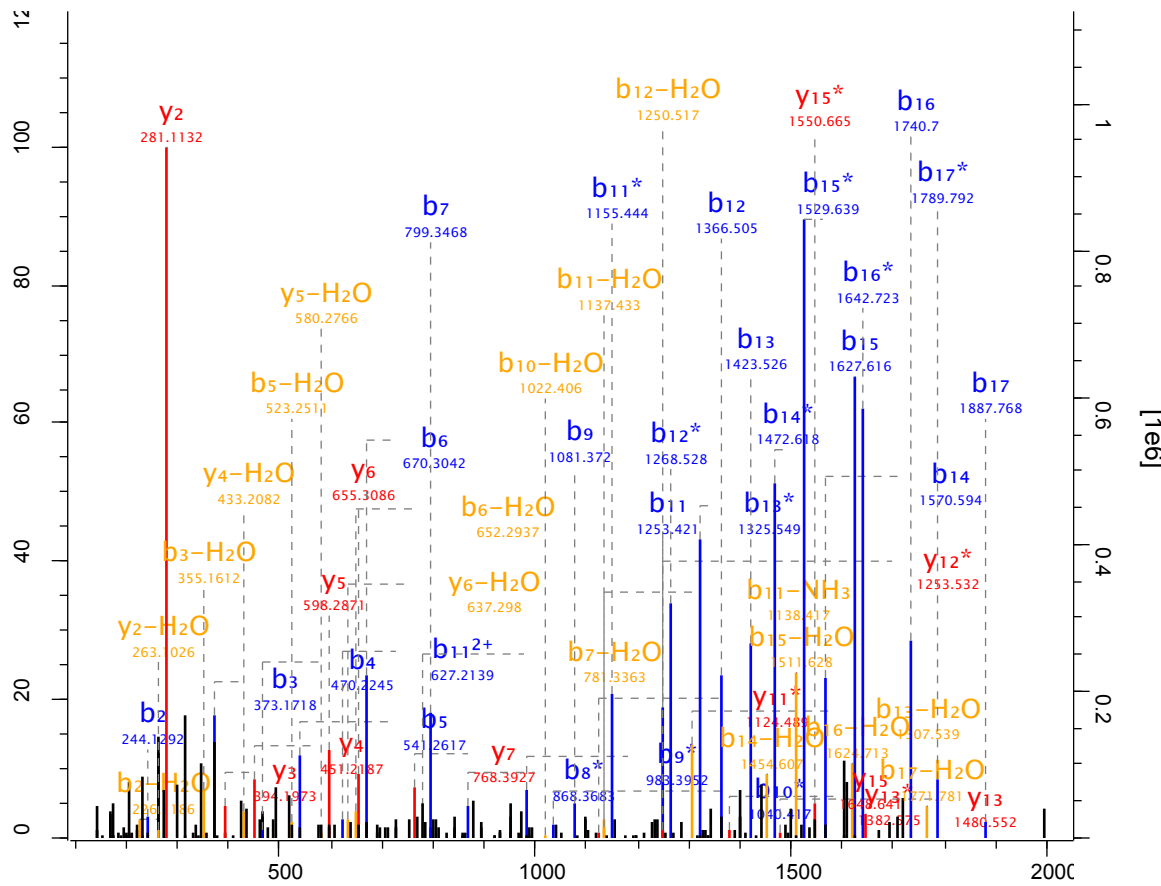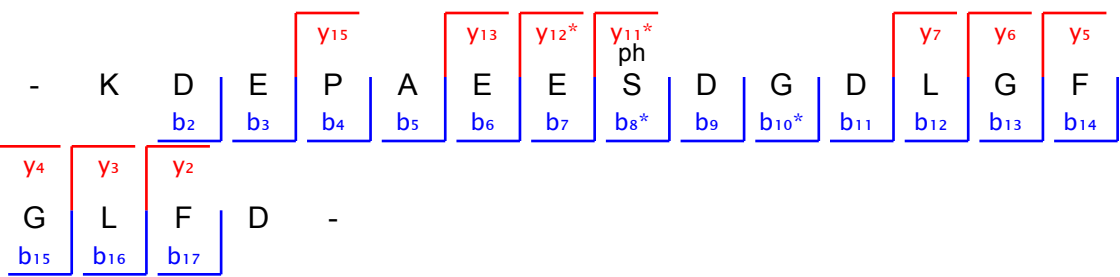

Raw file Scan Method Score m/z  
 18\_25 37188 FTMS; HCD 210.12 994.37

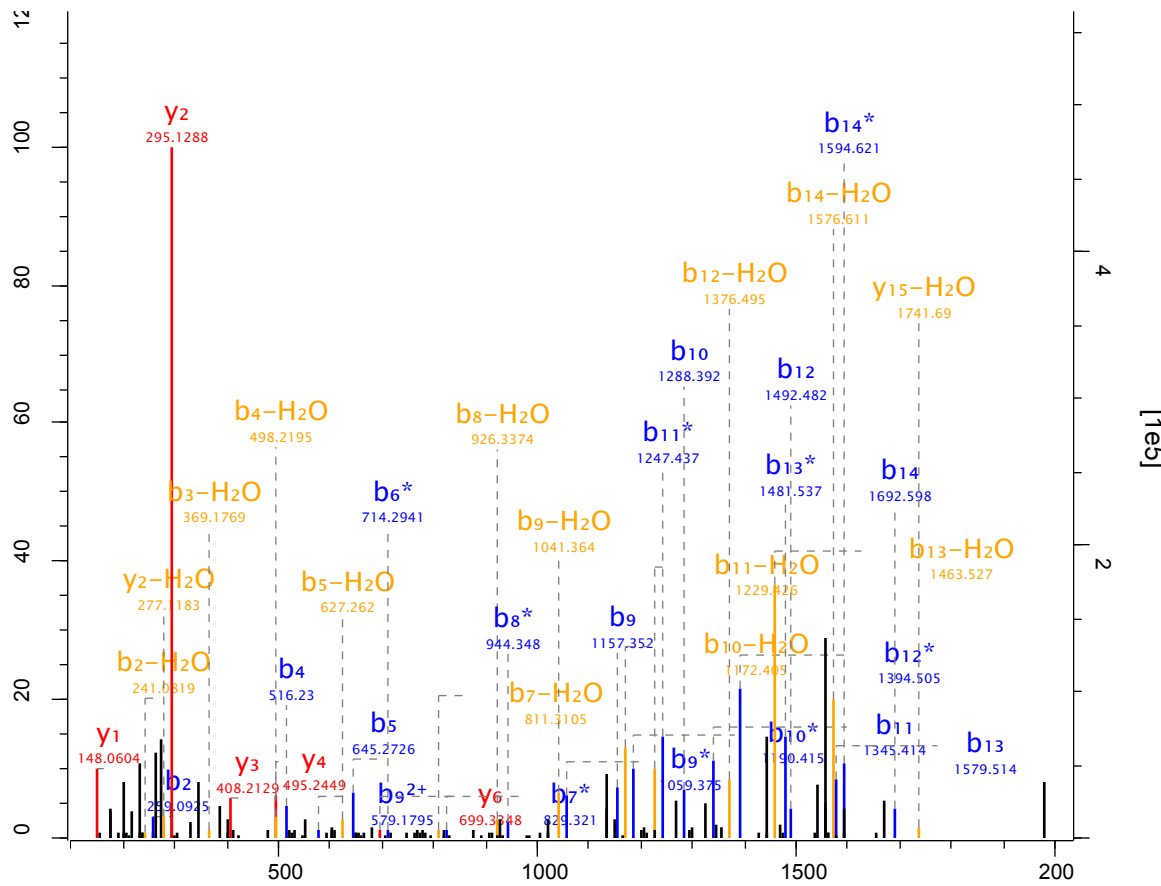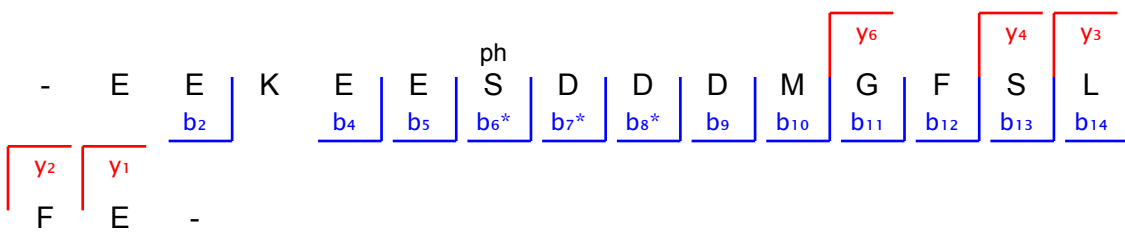

Raw file 18\_25 Scan 3815 Method FTMS; HCD Score 67.52 m/z 523.23

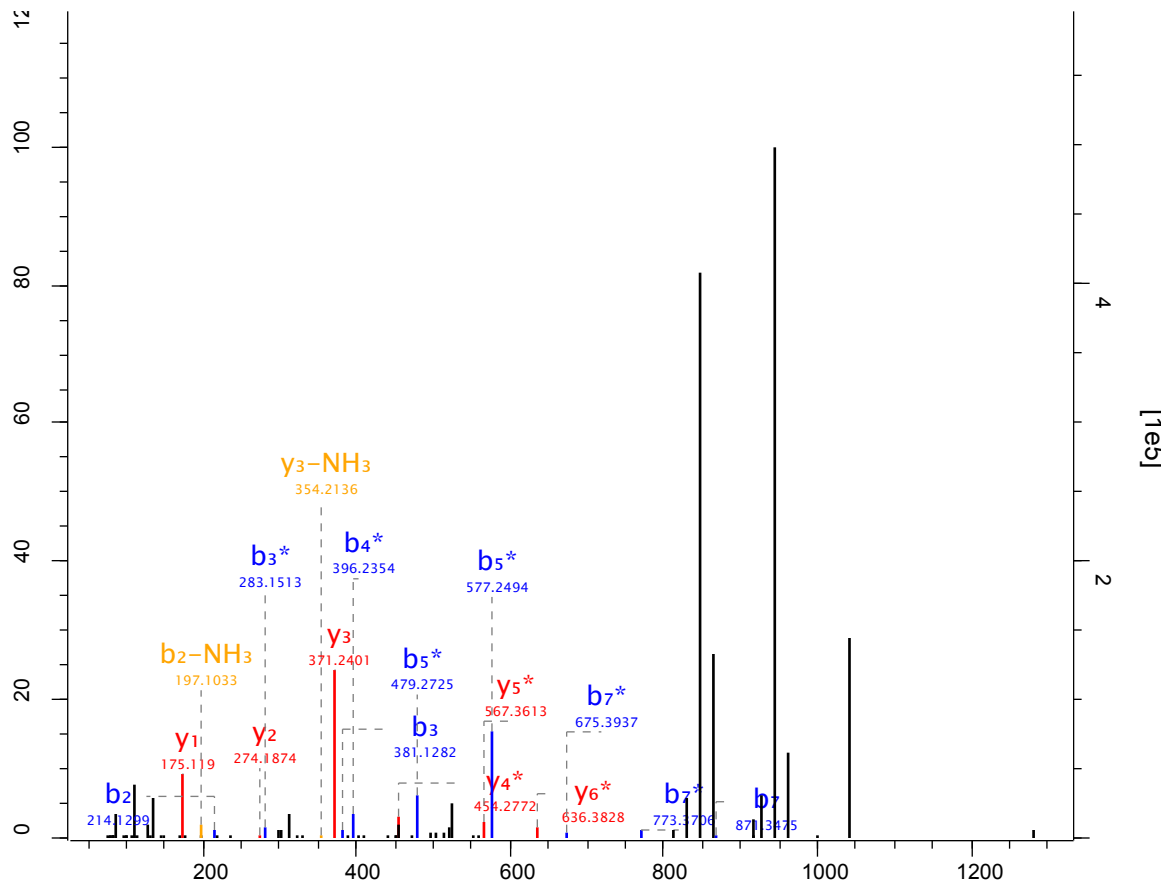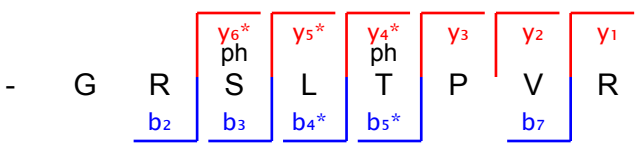



| Raw file | Scan | Method    | Score  | m/z   |
|----------|------|-----------|--------|-------|
| 18_25    | 4242 | FTMS; HCD | 159.41 | 620.8 |

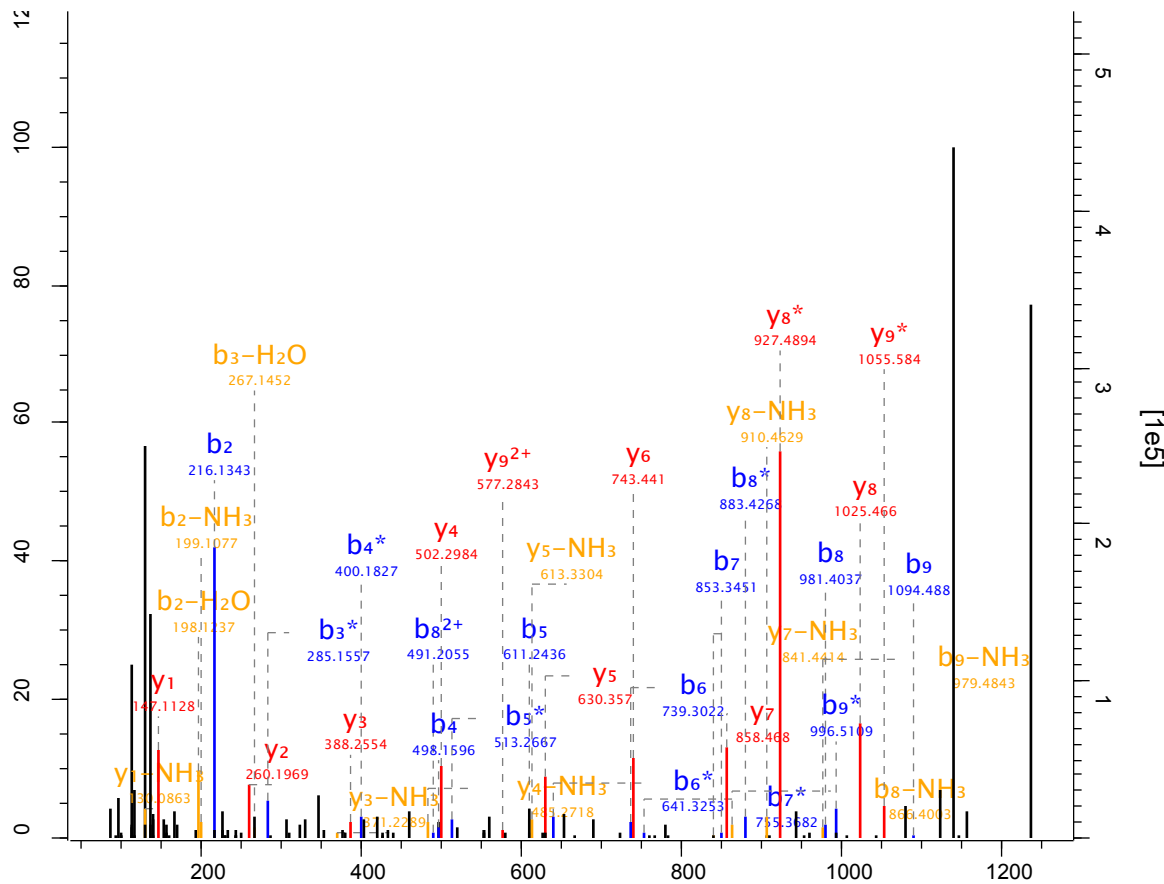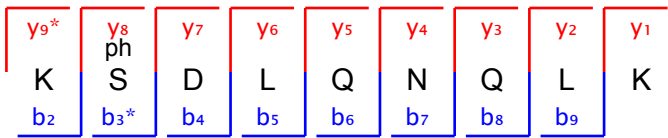

Raw file Scan Method Score m/z  
 18\_25 4612 FTMS; HCD 101.92 667.85

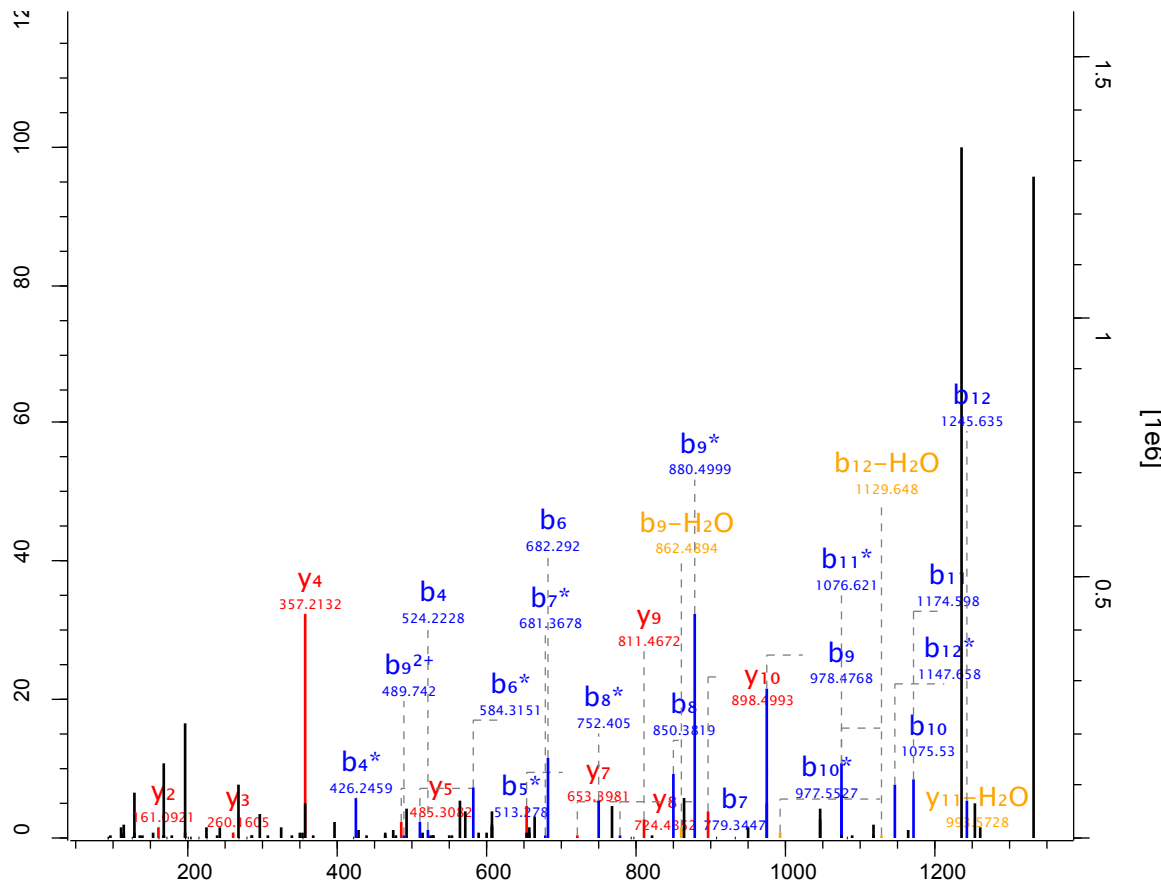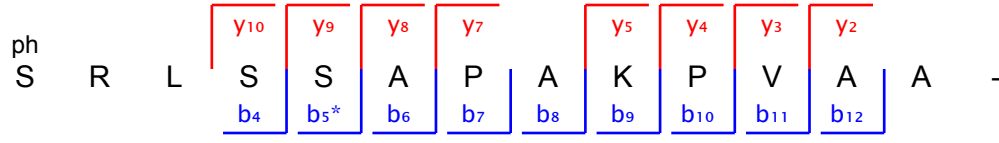

Raw file 18\_25 Scan 5803 Method FTMS; HCD Score 109.65 m/z 614.56

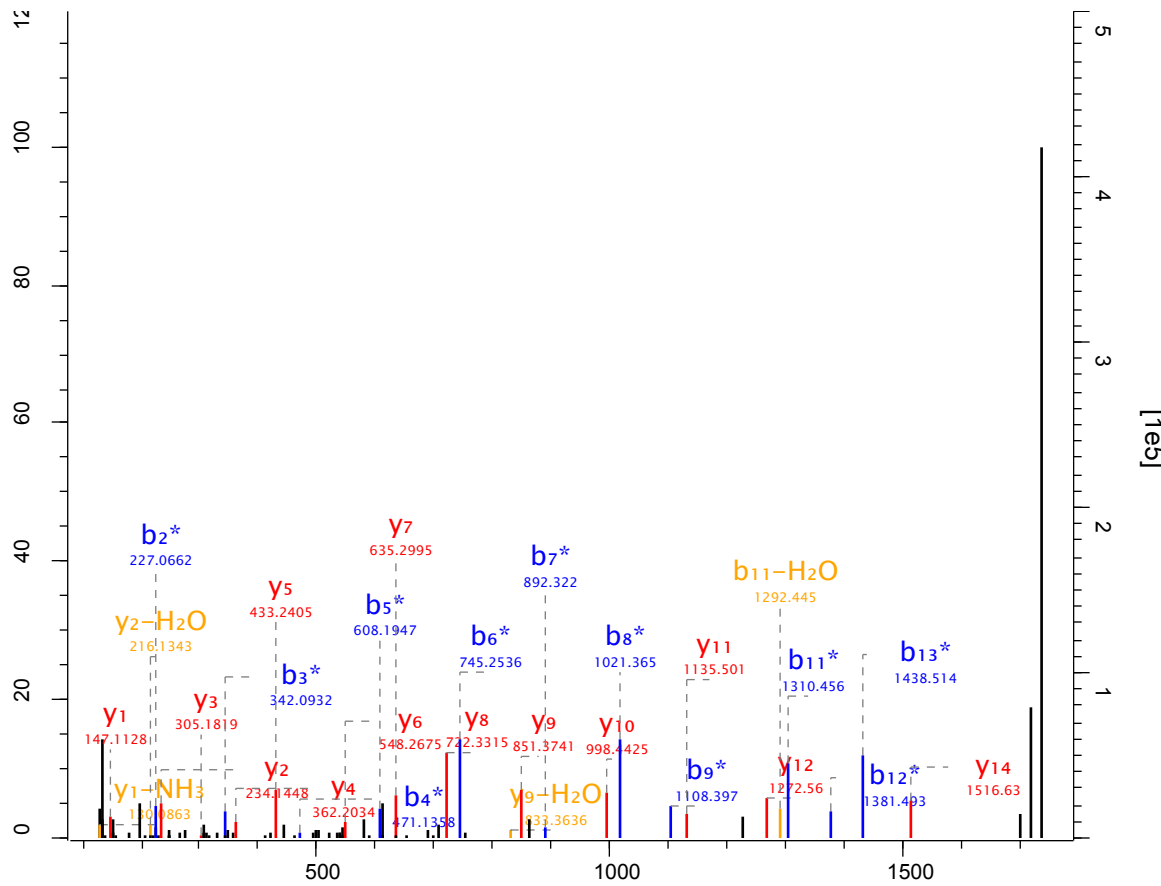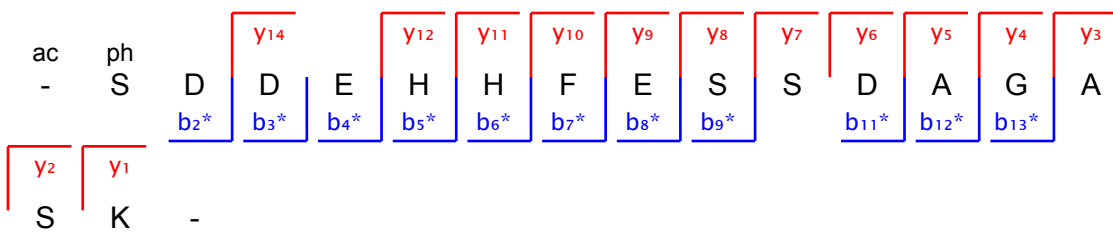

Raw file Scan Method Score m/z  
 18\_25 6251 FTMS; HCD 99.99 546.28

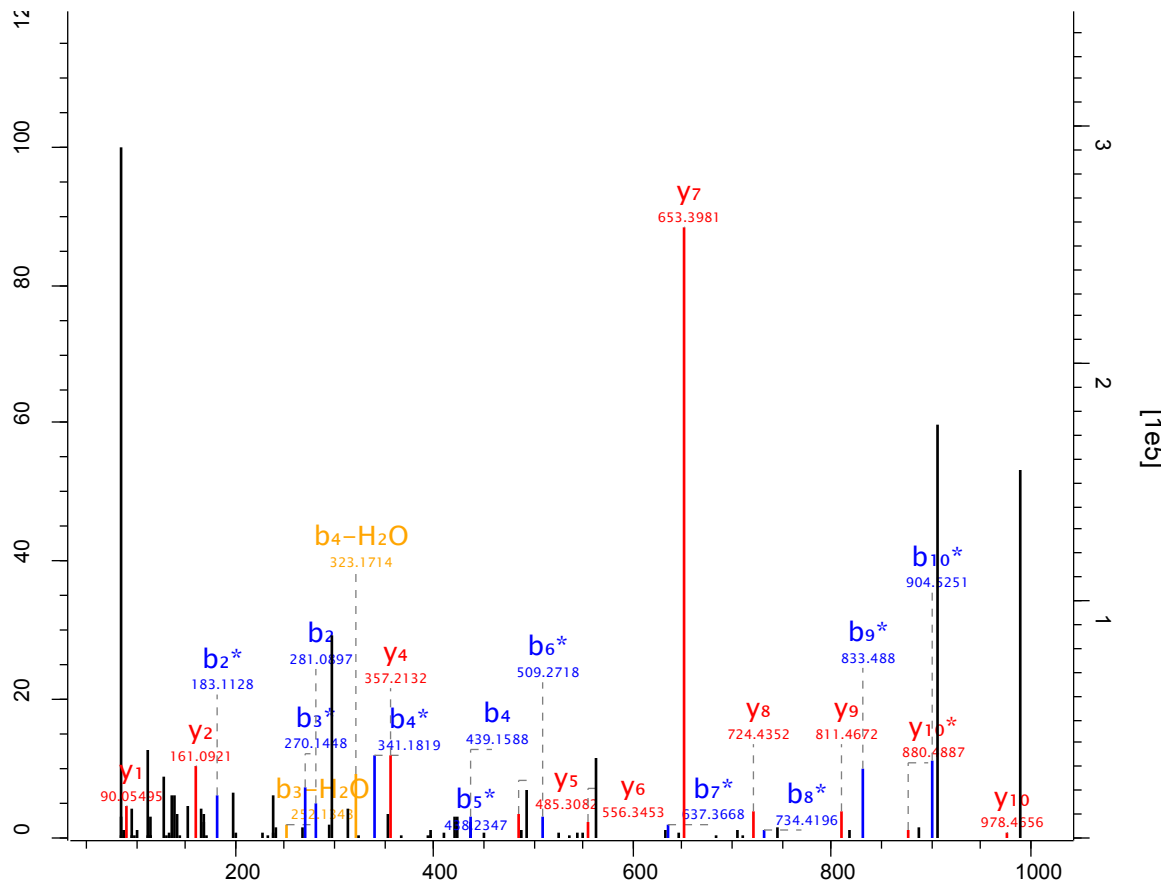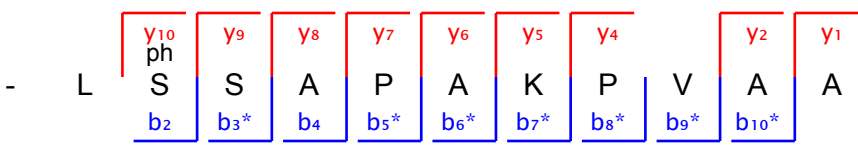

| Raw file | Scan | Method    | Score | m/z    |
|----------|------|-----------|-------|--------|
| 18_25    | 6355 | FTMS; HCD | 55.98 | 466.19 |

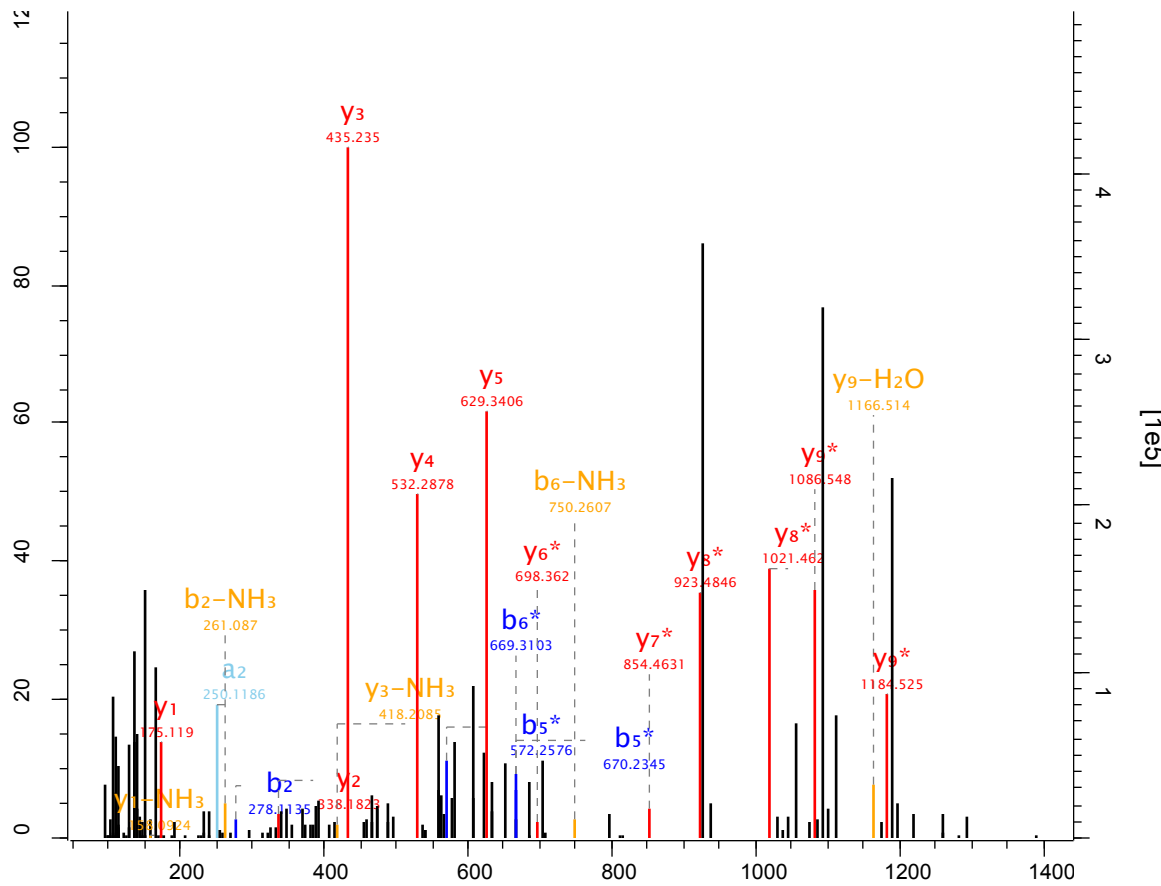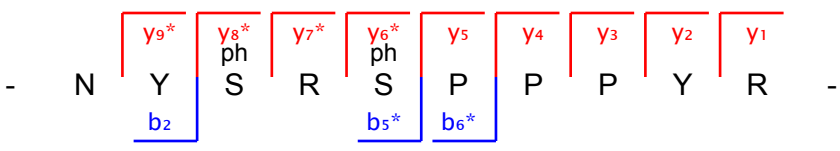

Raw file Scan Method Score m/z  
 18\_25 6562 FTMS; HCD 76.93 520.75

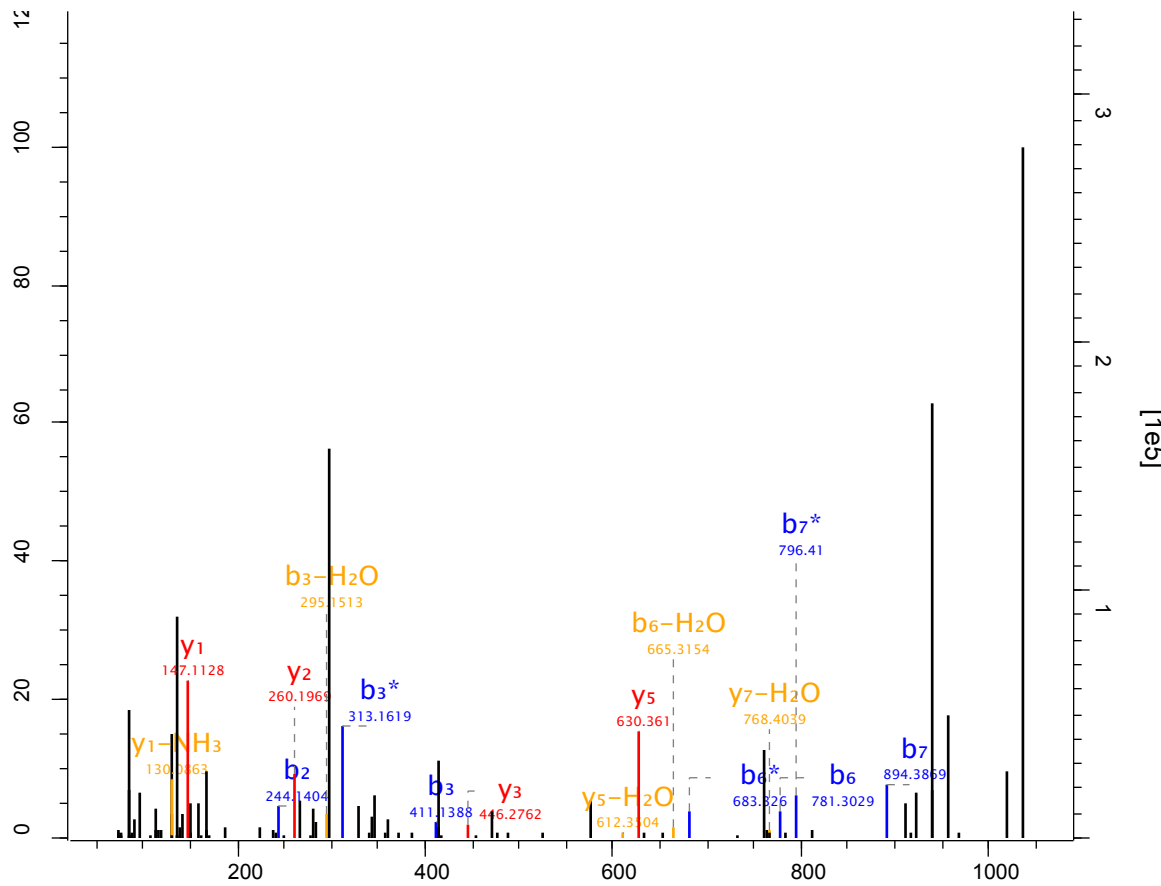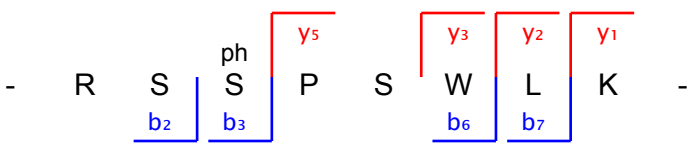

Raw file 18\_25 Scan 6790 Method FTMS; HCD Score 72.82 m/z 602.72

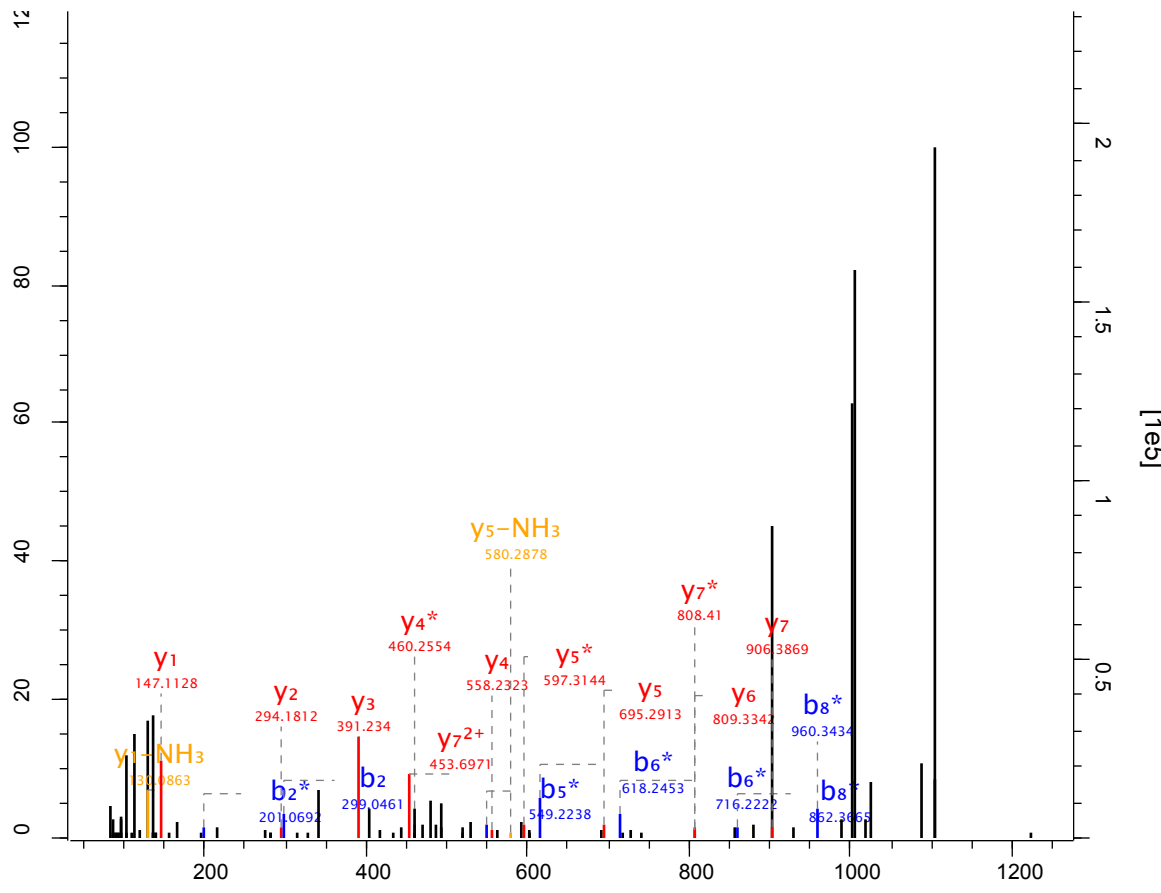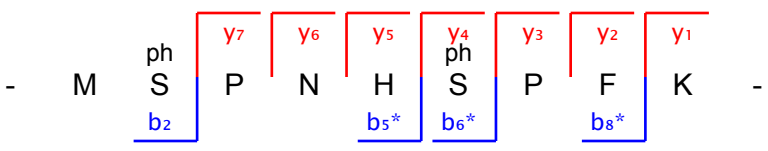

Raw file Scan Method Score m/z  
 18\_25 7744 FTMS; HCD 71.68 770.3

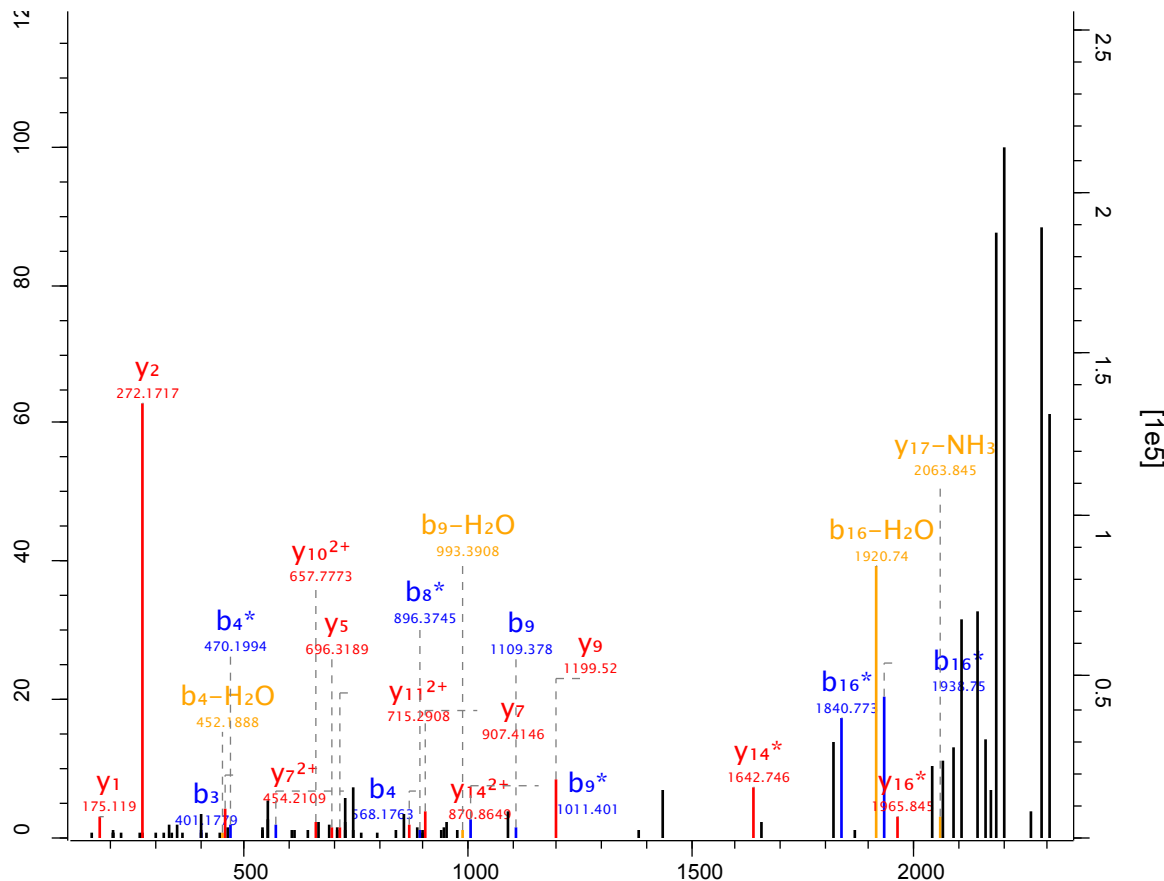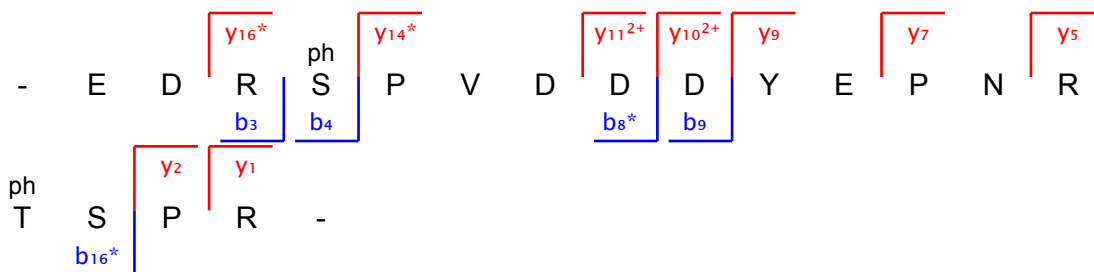



| Raw file | Scan | Method    | Score | m/z    |
|----------|------|-----------|-------|--------|
| 18_25    | 7874 | FTMS; HCD | 51.03 | 507.91 |

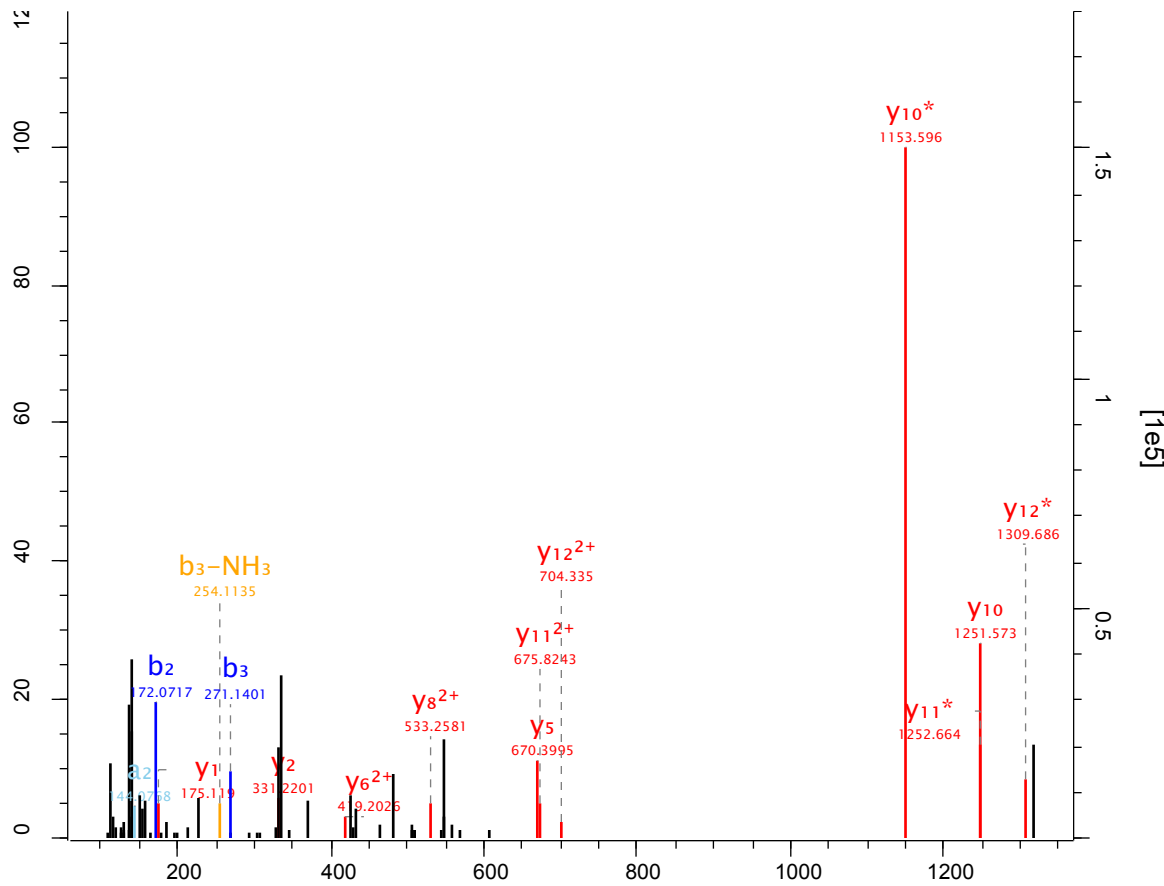

- N  $y_{12}^*$   $y_{11}^*$   $y_{10}$  E  $y_8^{2+}$  E  $y_6^{2+}$  ph  $y_5$  I E  $y_2$   $y_1$  -

$b_2$   $b_3$

| Raw file | Scan | Method    | Score  | m/z    |
|----------|------|-----------|--------|--------|
| 18_25    | 8272 | FTMS; HCD | 110.31 | 569.25 |

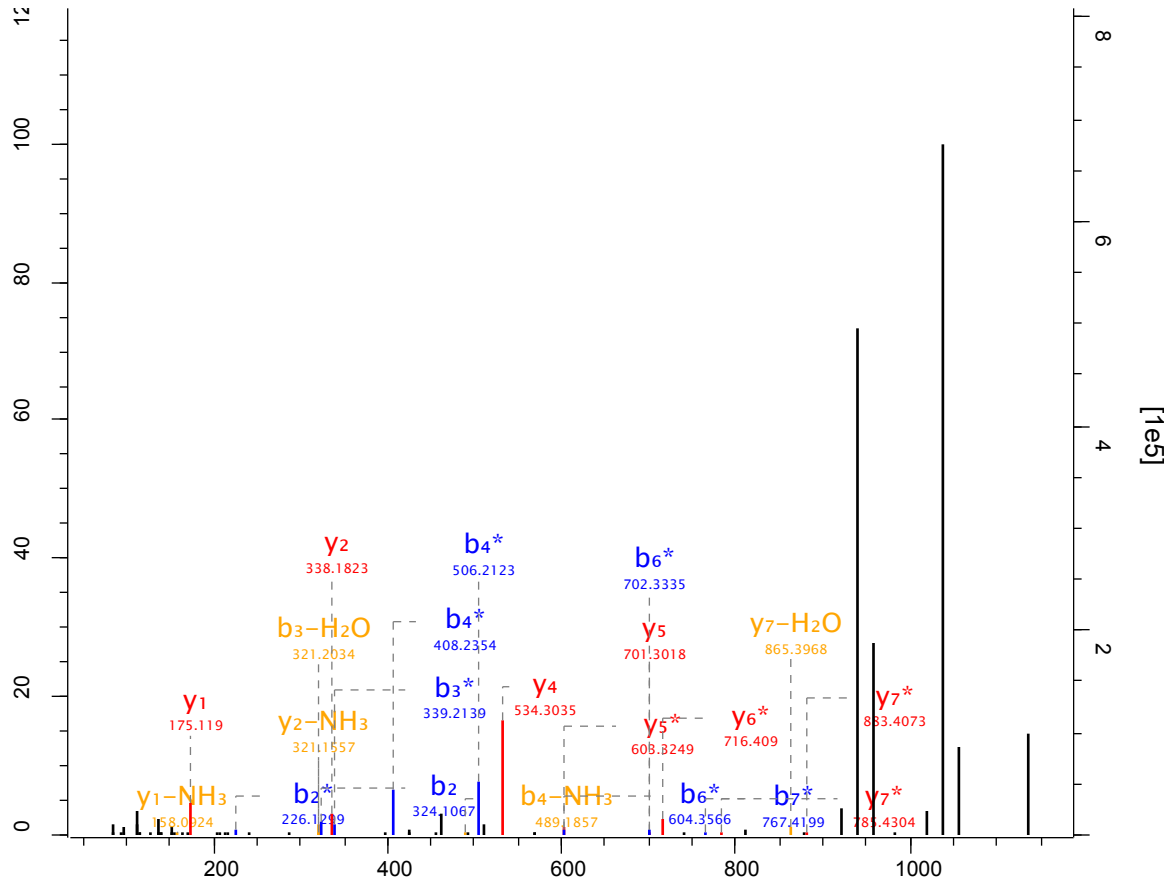

- R y<sub>7</sub>\* y<sub>6</sub>\* y<sub>5</sub> y<sub>4</sub> y<sub>2</sub> y<sub>1</sub>  
 - R S L S P V Y R -  
b<sub>2</sub> b<sub>3</sub>\* b<sub>4</sub>\* b<sub>6</sub>\* b<sub>7</sub>\*

Raw file Scan Method Score m/z  
 18\_25 8577 FTMS; HCD 229.55 787.81

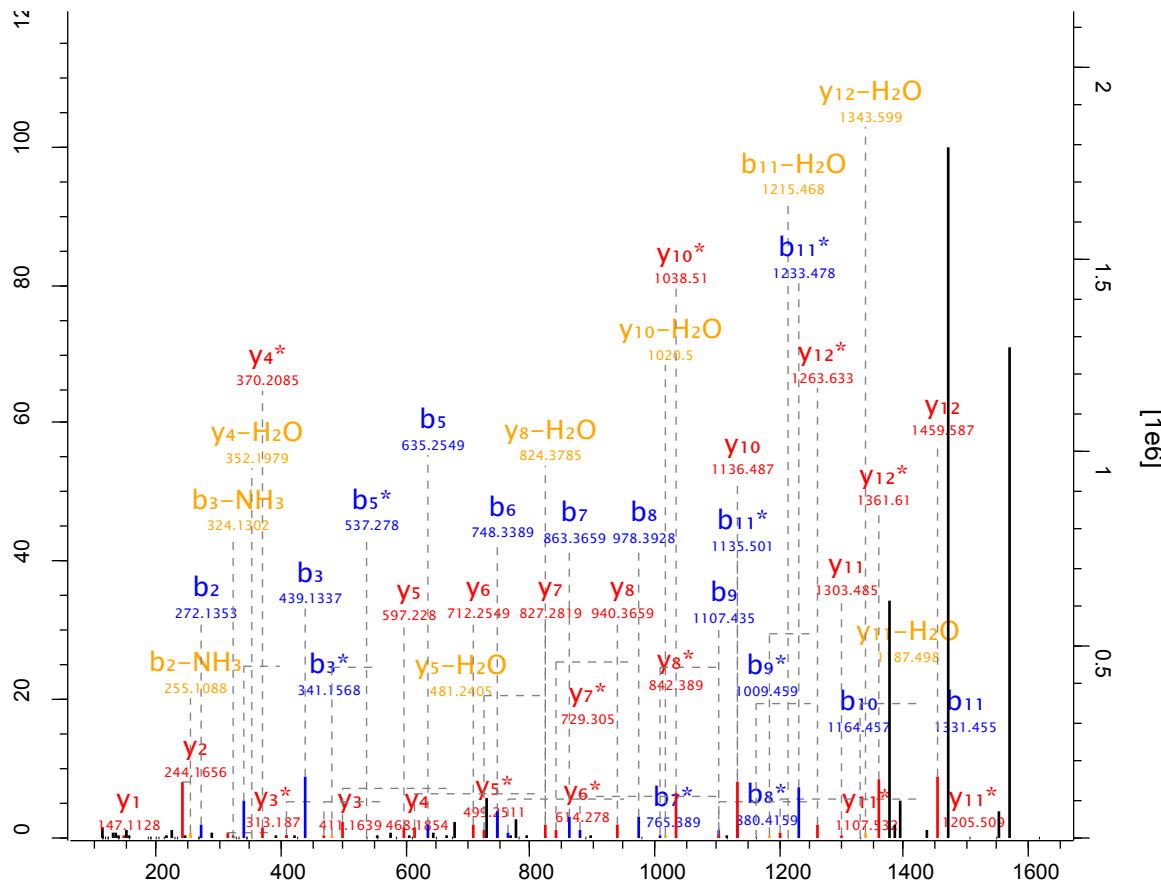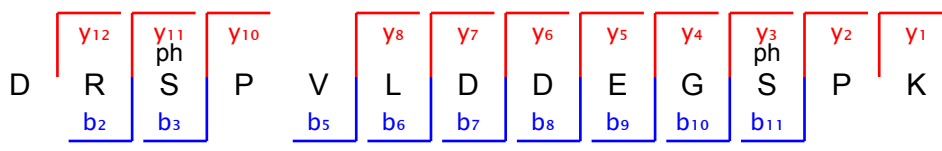

| Raw file | Scan | Method    | Score | m/z    |
|----------|------|-----------|-------|--------|
| 18_25    | 8947 | FTMS; HCD | 48.9  | 628.28 |

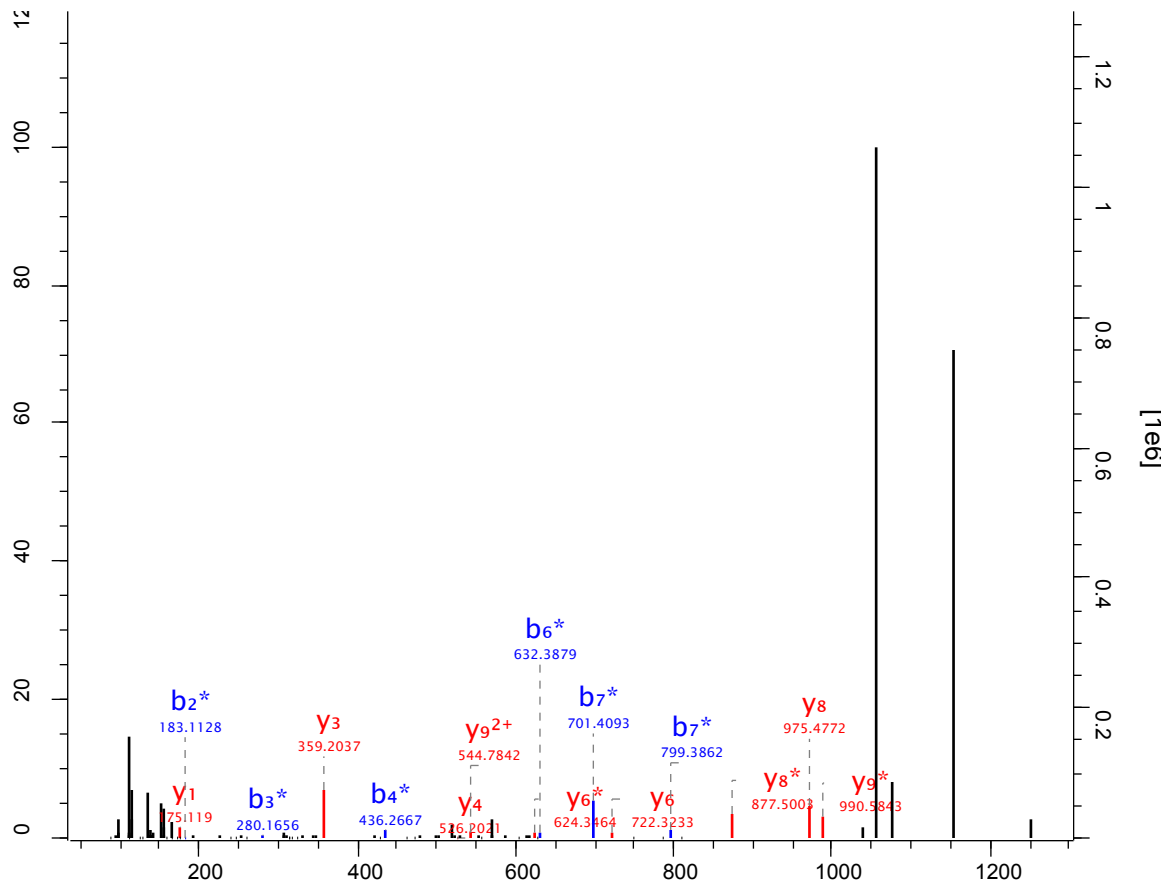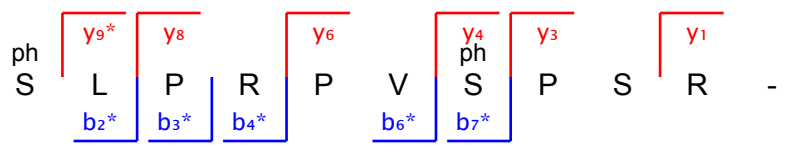

Raw file 18\_25 Scan 9518 Method FTMS; HCD Score 139.11 m/z 818.8

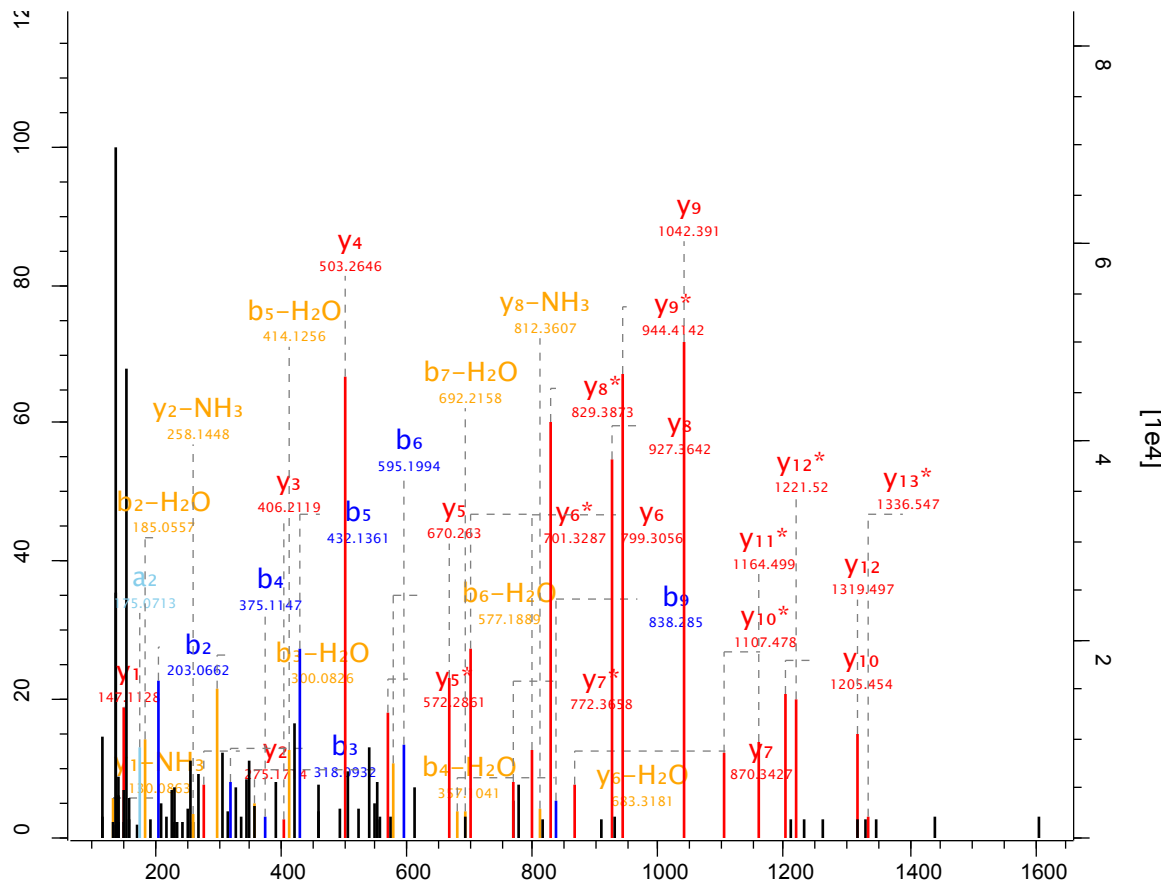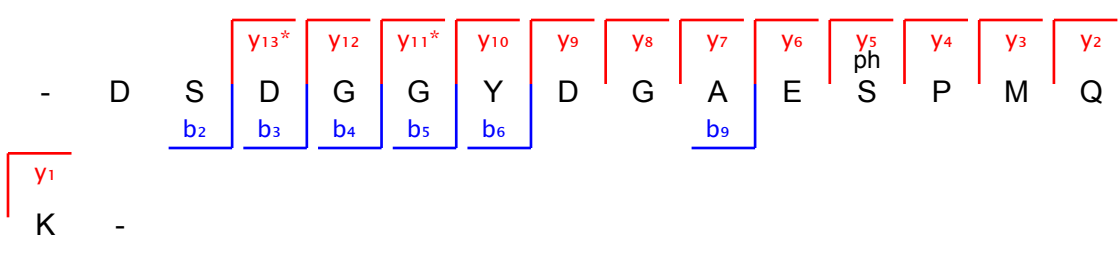

Raw file Scan Method Score m/z  
 2013\_COL15\_18\_25 1578 FTMS; HCD 50.09 379.86

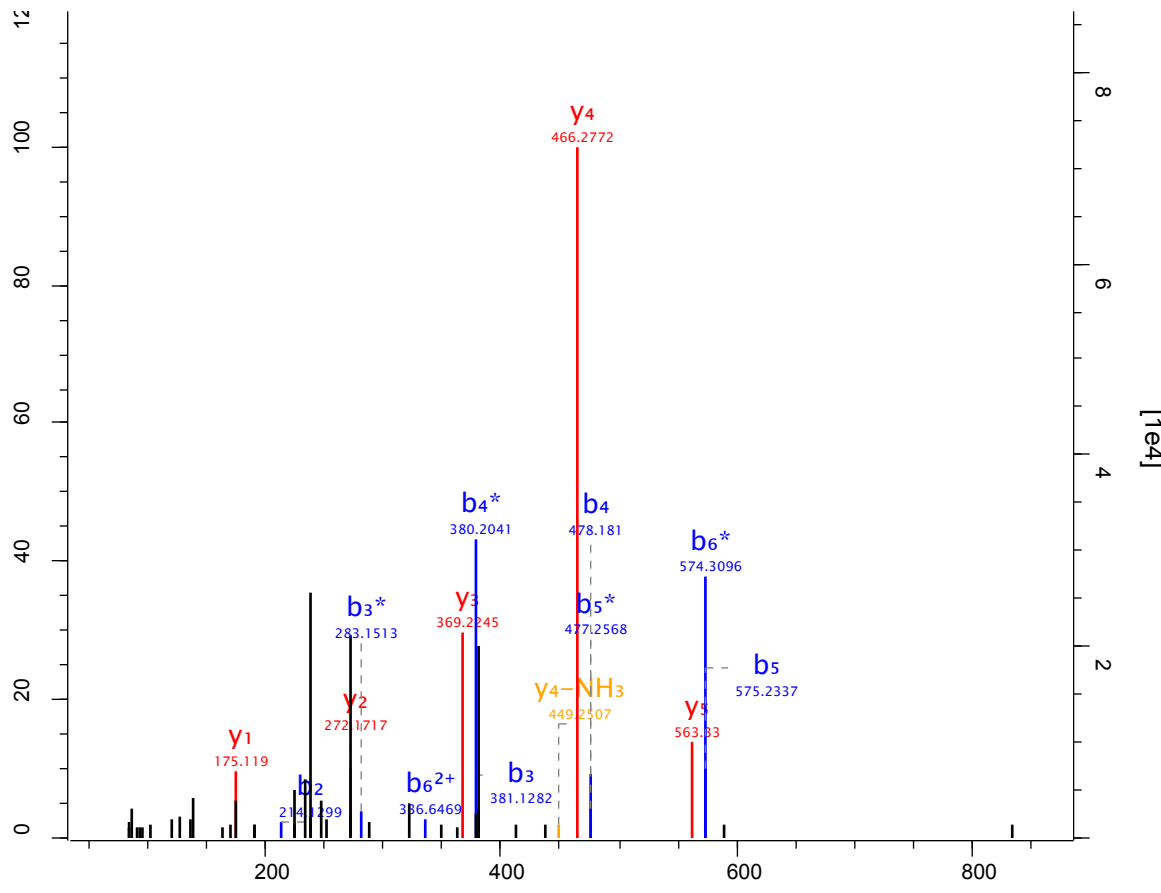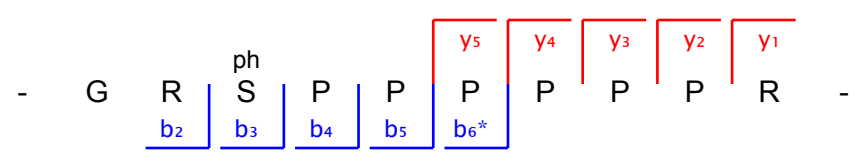

Raw file Scan Method Score m/z  
 2013\_COL15\_25\_30 14600 FTMS; HCD 60.4 517.71

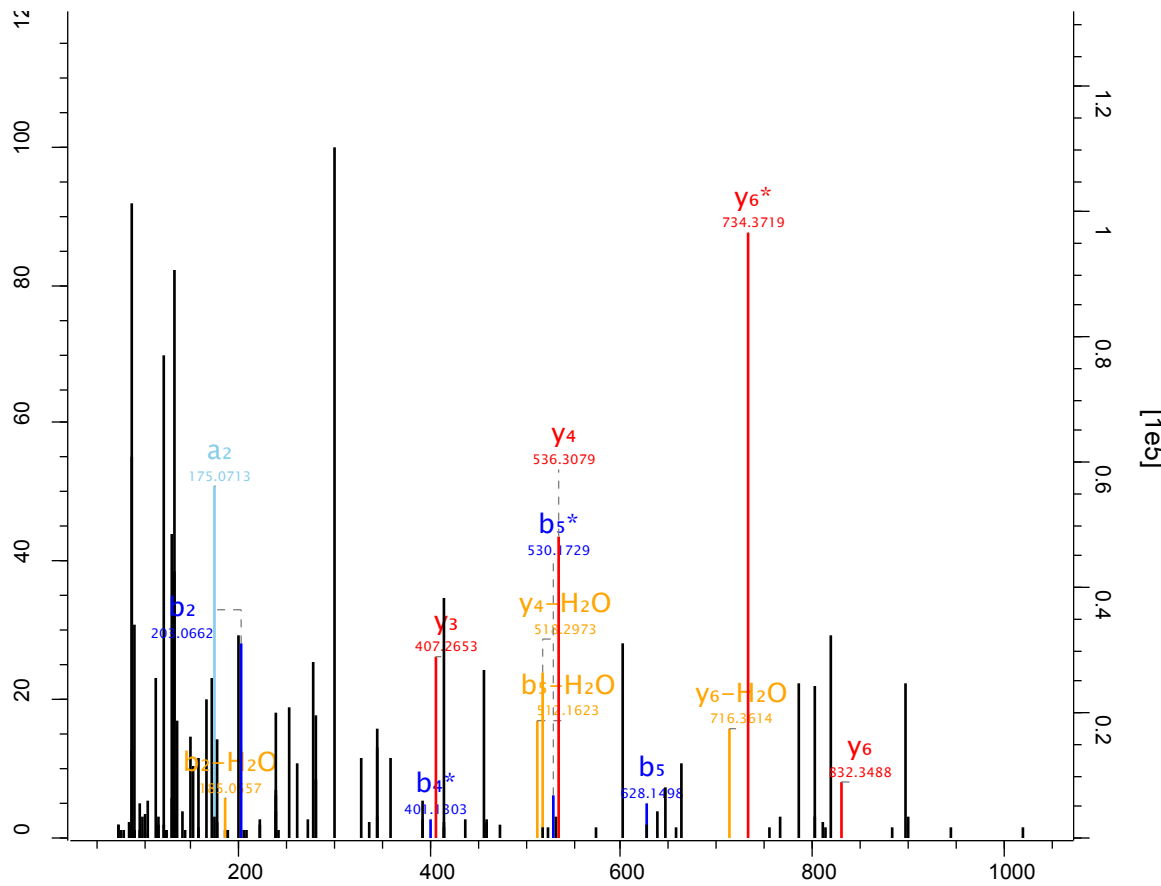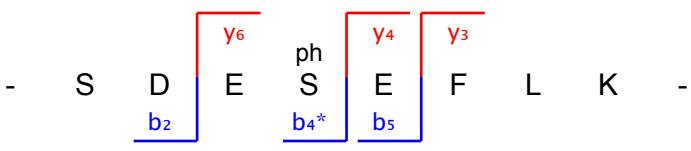

Raw file Scan Method Score m/z  
 2013\_COL15\_25\_30 2024 FTMS; HCD 40.28 461.21

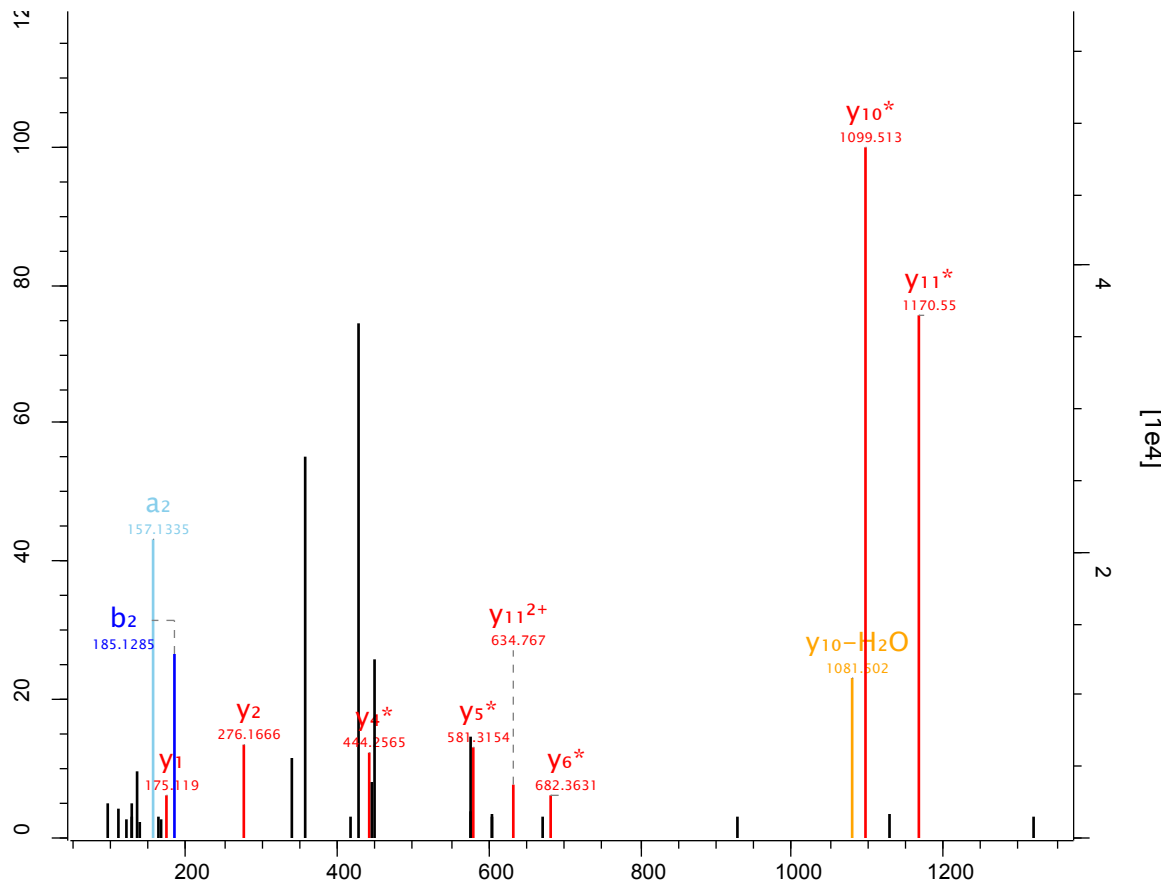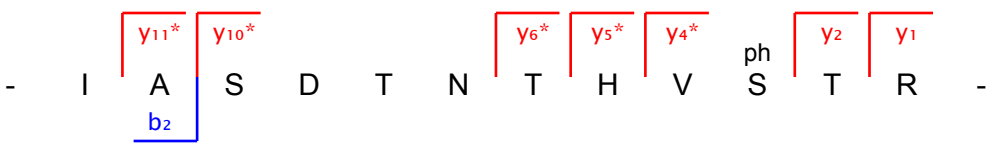



| Raw file         | Scan | Method    | Score | m/z    |
|------------------|------|-----------|-------|--------|
| 2013_COL15_25_30 | 2964 | FTMS; HCD | 40.35 | 458.73 |

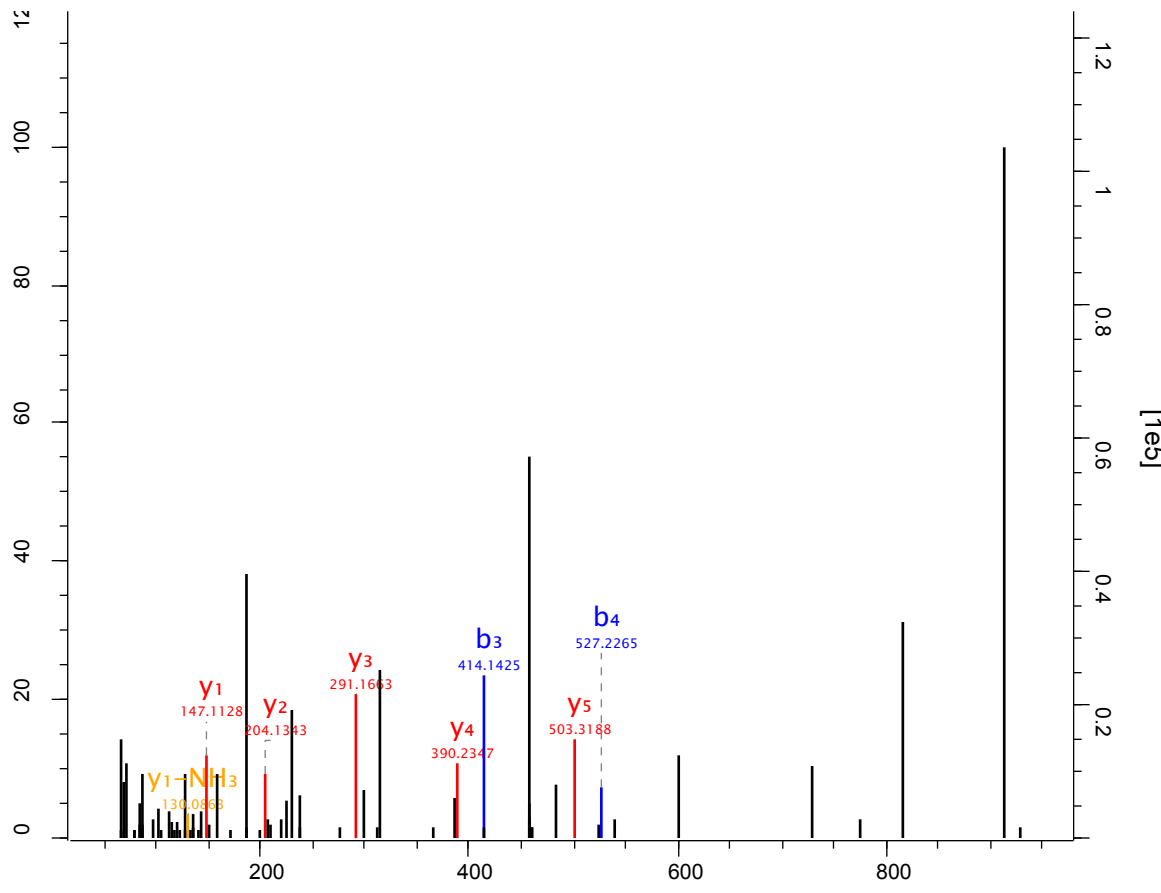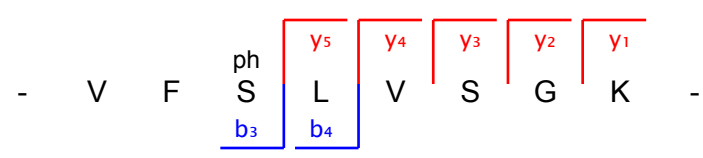

Raw file Scan Method Score m/z  
 2013\_COL15\_25\_30 3521 FTMS; HCD 50.08 699.31

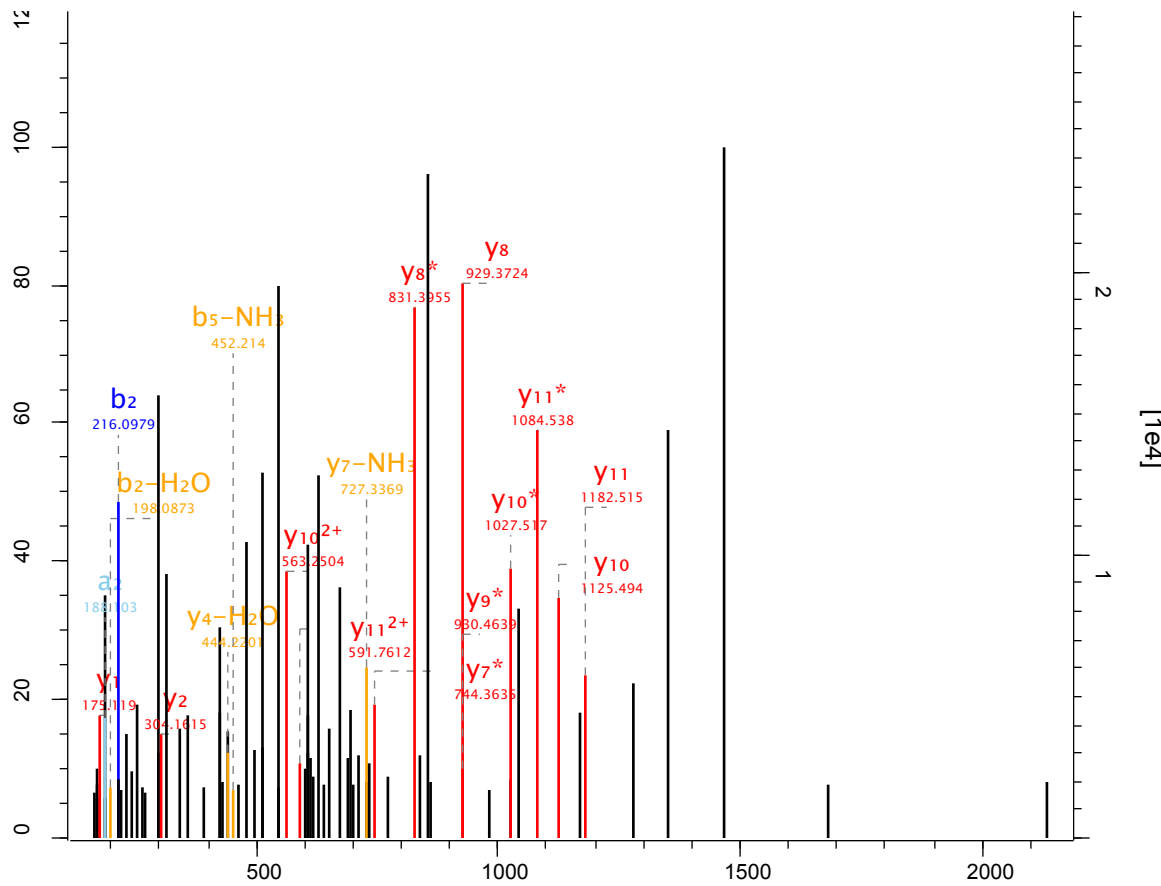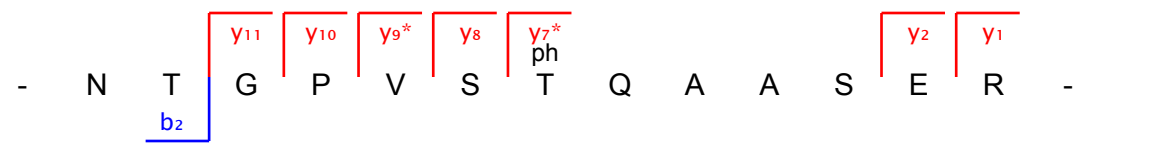

Raw file Scan Method Score m/z  
 2013\_COL15\_25\_30 4493 FTMS; HCD 60.16 529.75

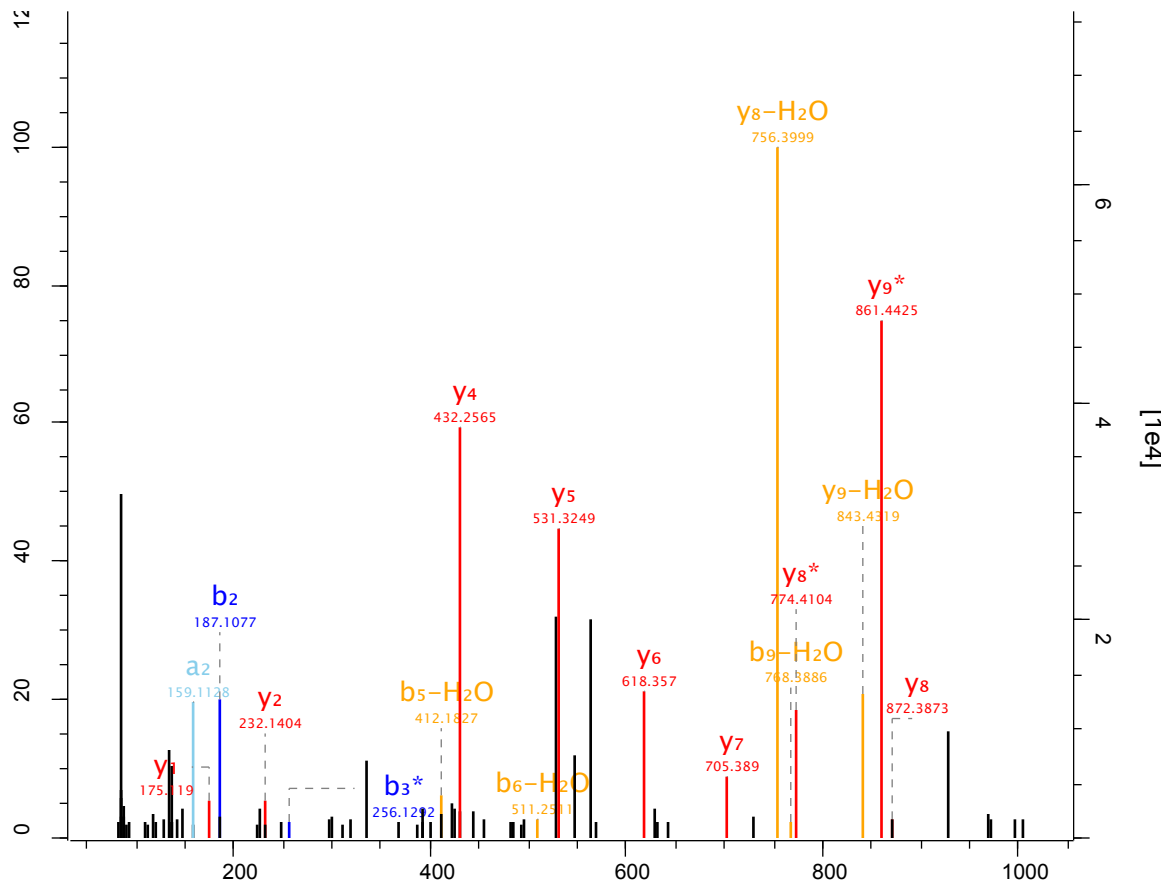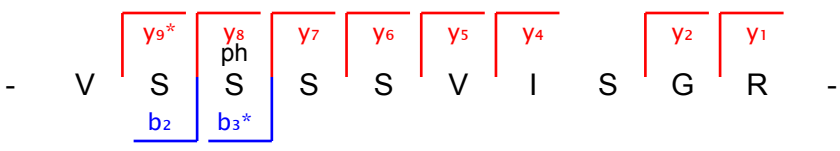

Raw file Scan Method Score m/z  
 2013\_COL15\_25\_30 6497 FTMS; HCD 43.59 472.88

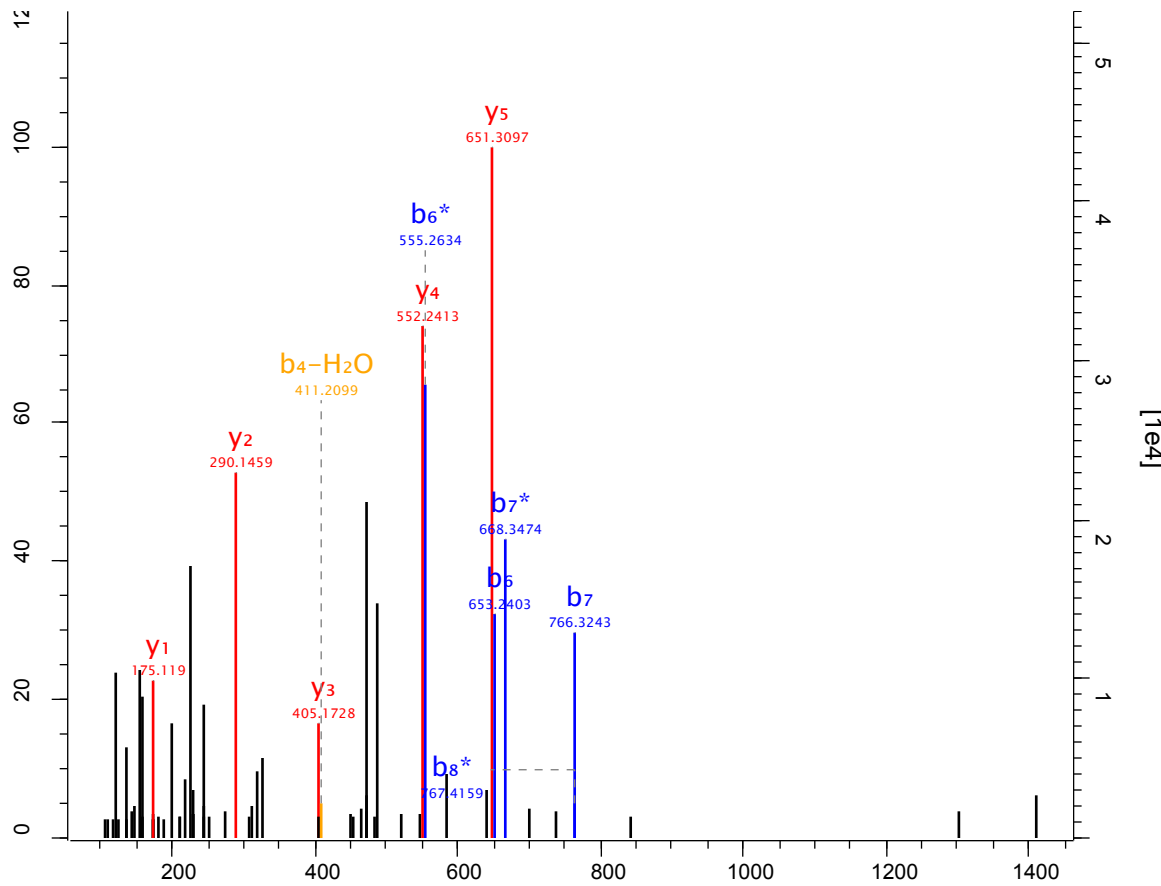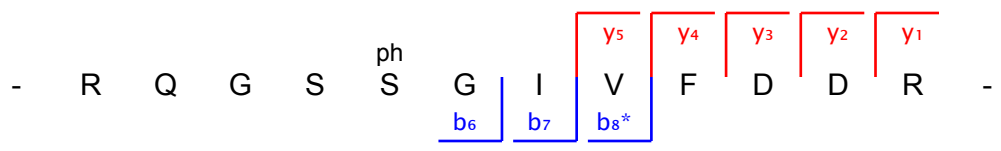

| Raw file         | Scan | Method    | Score | m/z    |
|------------------|------|-----------|-------|--------|
| 2013_COL15_25_30 | 8273 | FTMS; HCD | 66.19 | 469.23 |

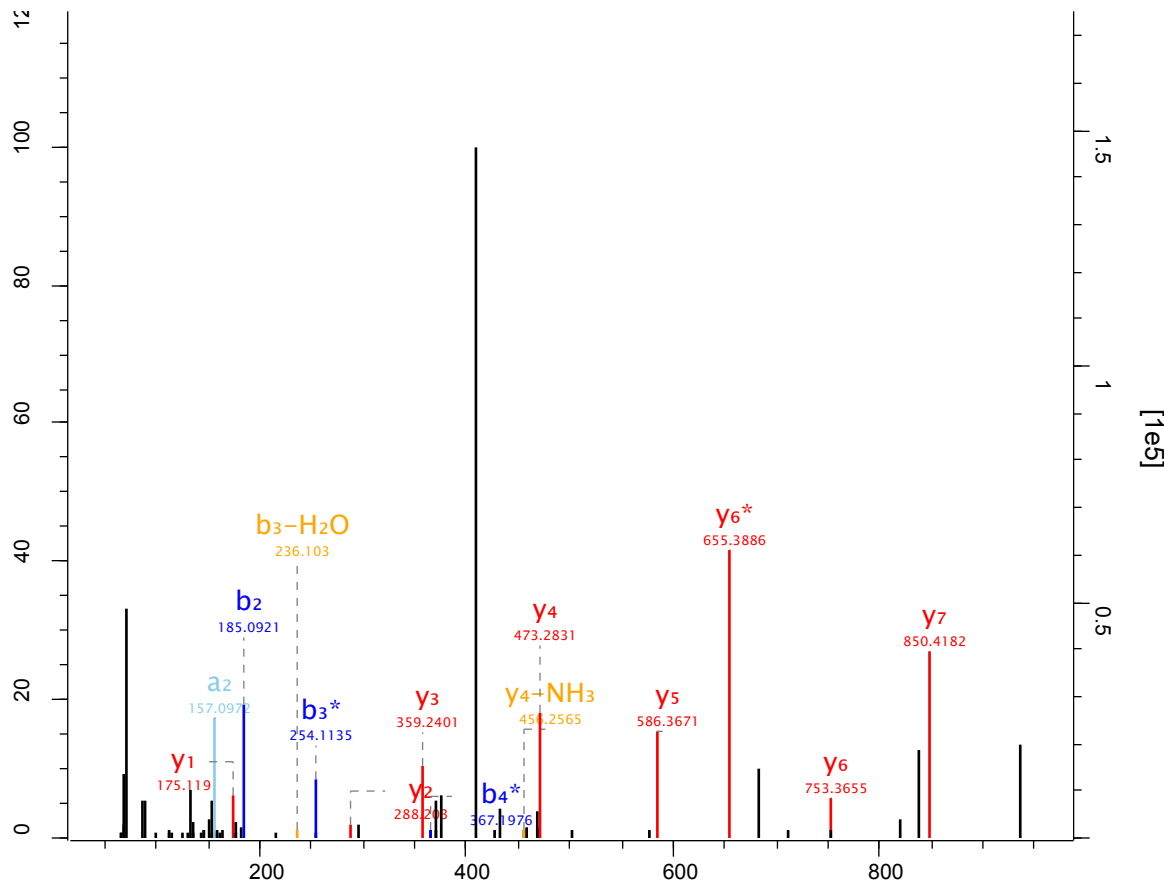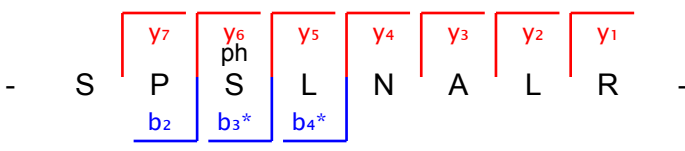

Raw file Scan Method Score m/z  
 2013\_COL15\_25\_30 9020 FTMS; HCD 42.52 695.79

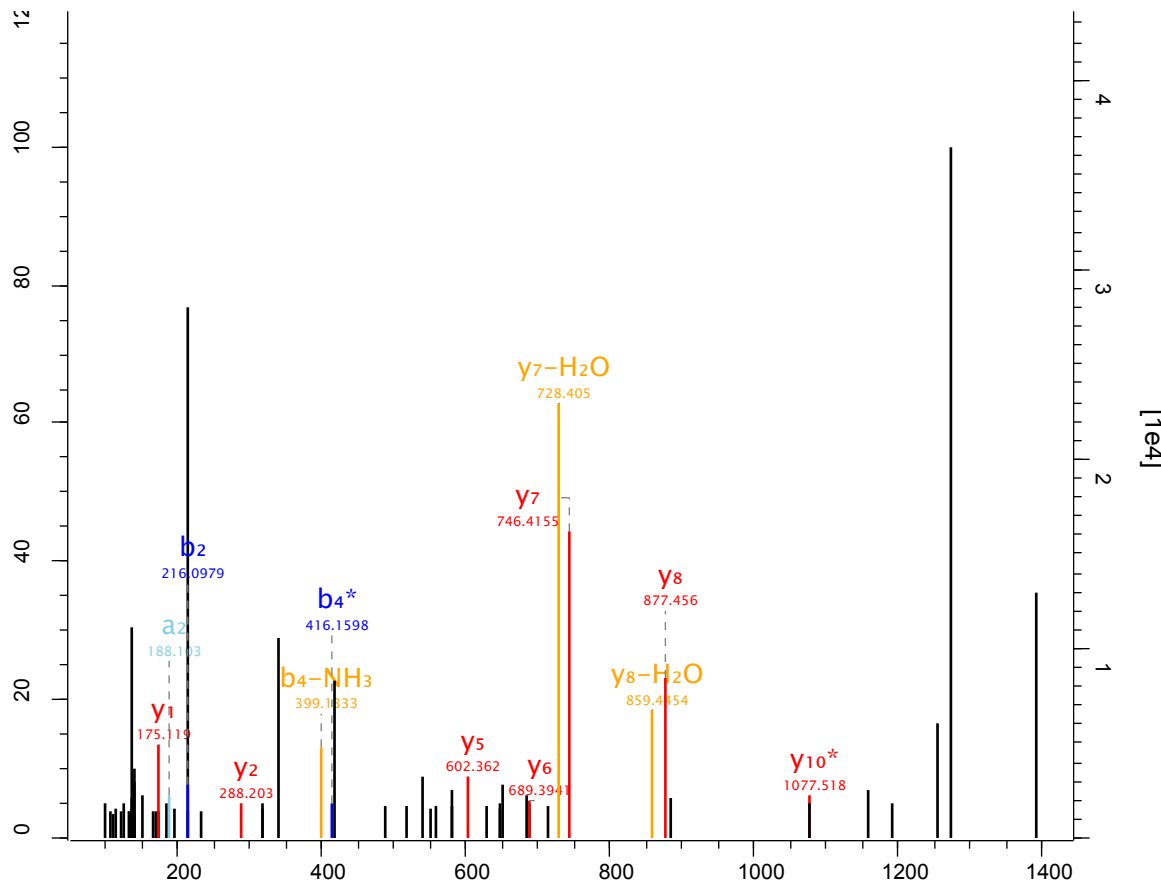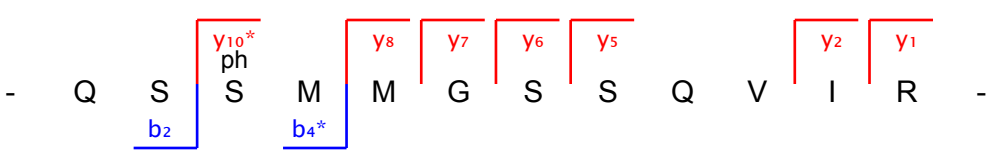

Raw file Scan Method Score m/z  
 2013\_COL15\_30\_34 10100 FTMS; HCD 53.55 803.7

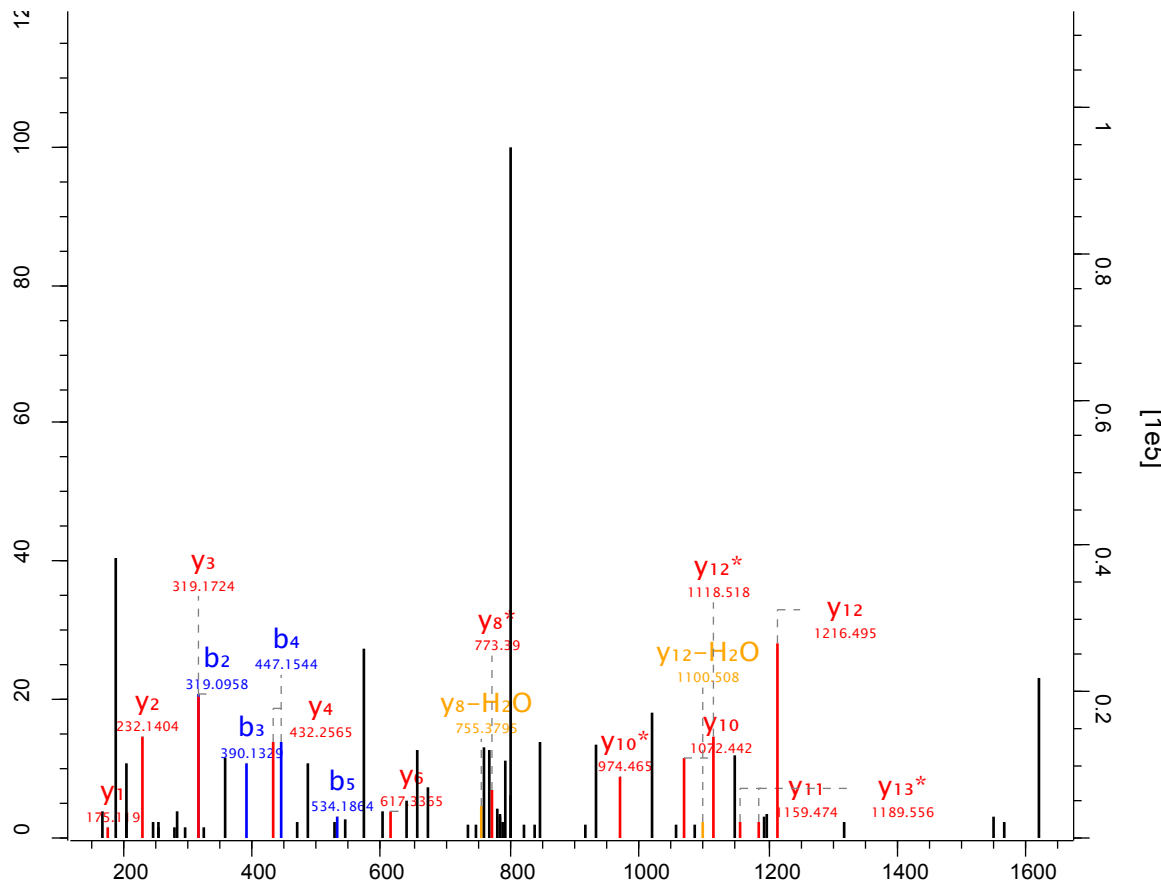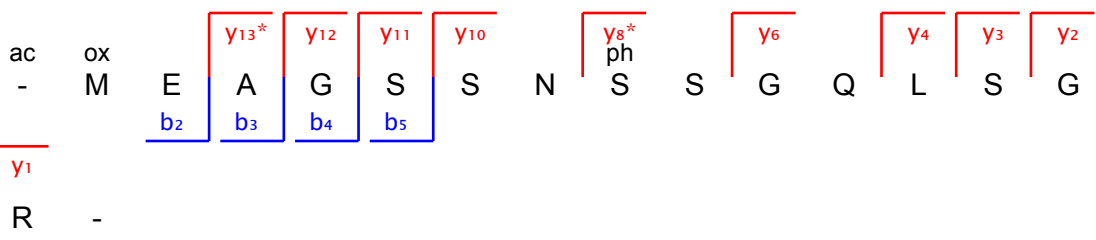

Raw file Scan Method Score m/z  
 2013\_COL15\_30\_34 10168 FTMS; HCD 84.12 698.3

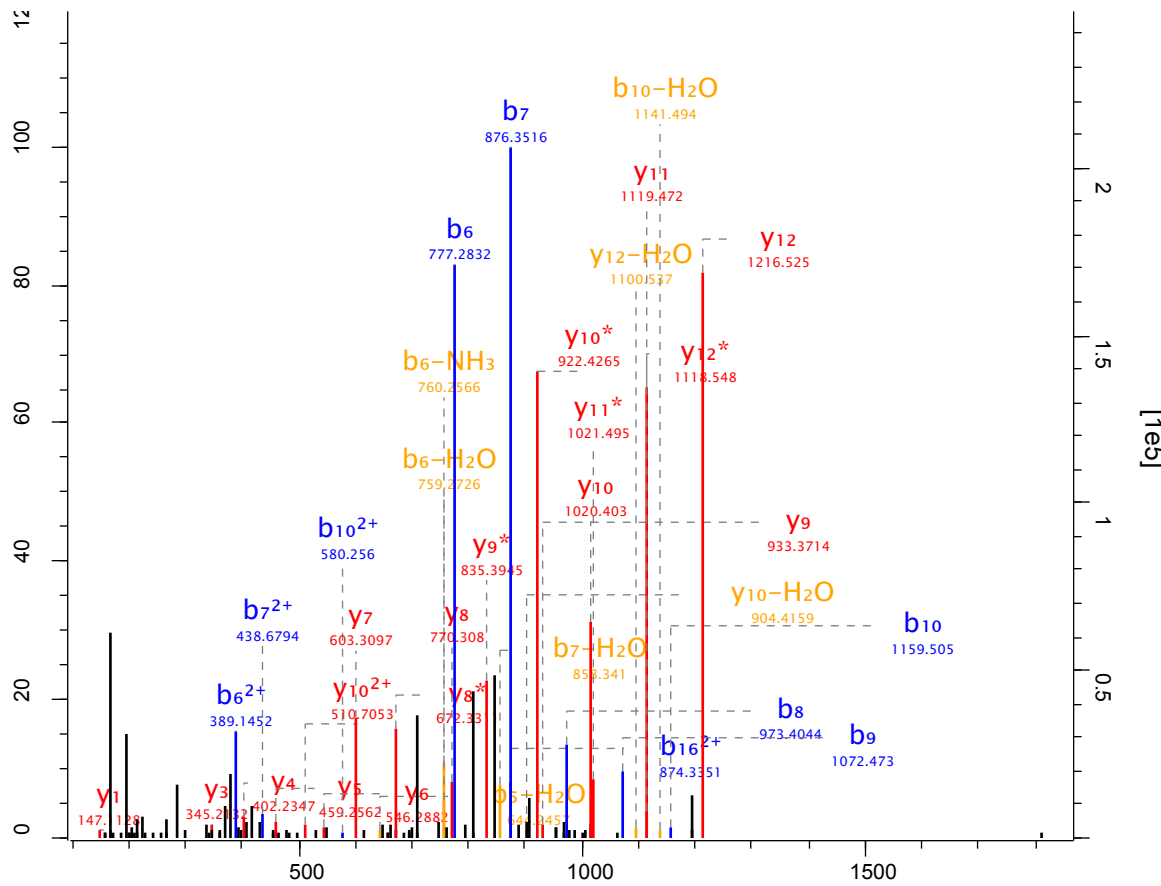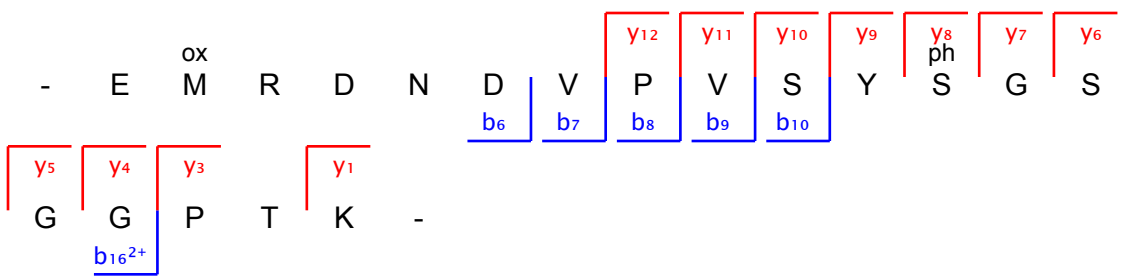



Raw file Scan Method Score m/z  
 2013\_COL15\_30\_34 10188 FTMS; HCD 184.59 636.29

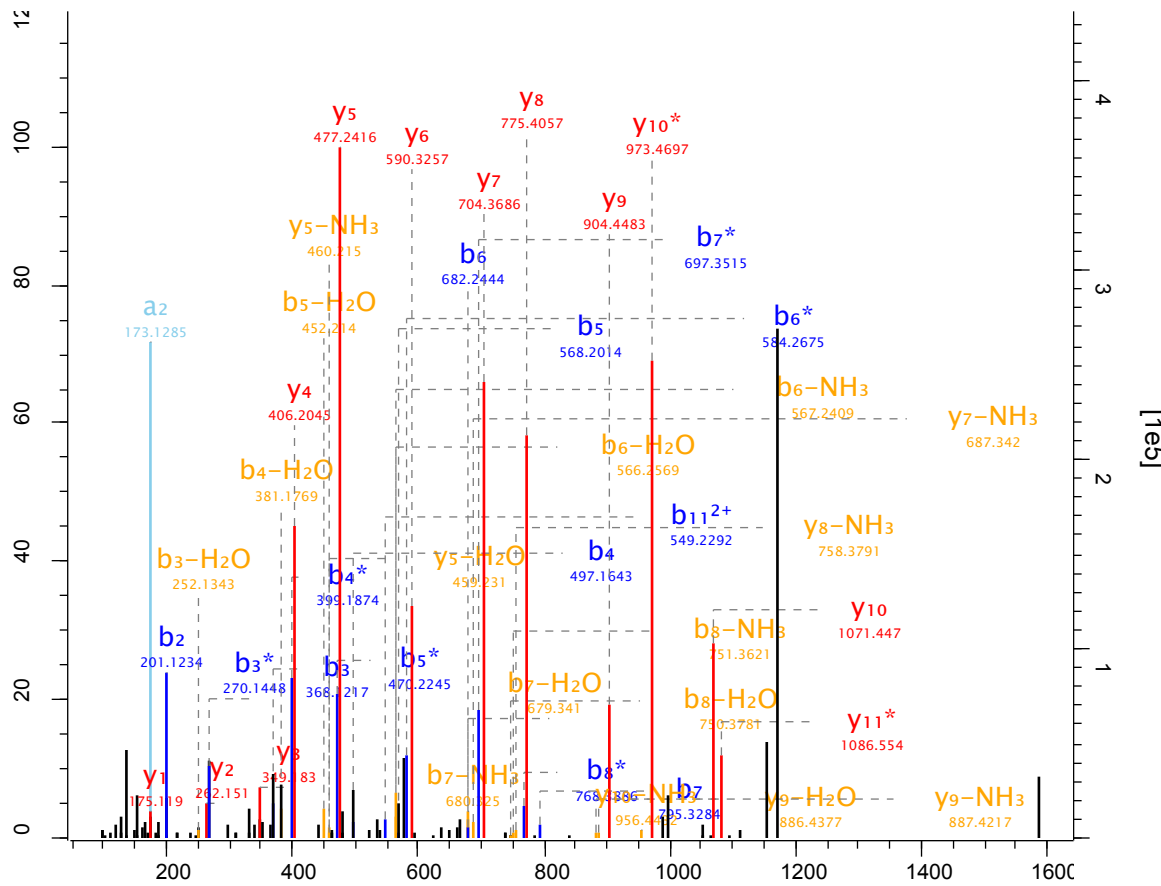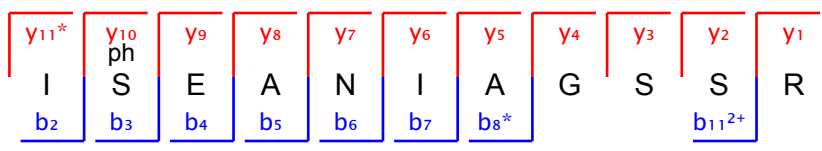

Raw file Scan Method Score m/z  
 2013\_COL15\_30\_34 10216 FTMS; HCD 40.94 594.24

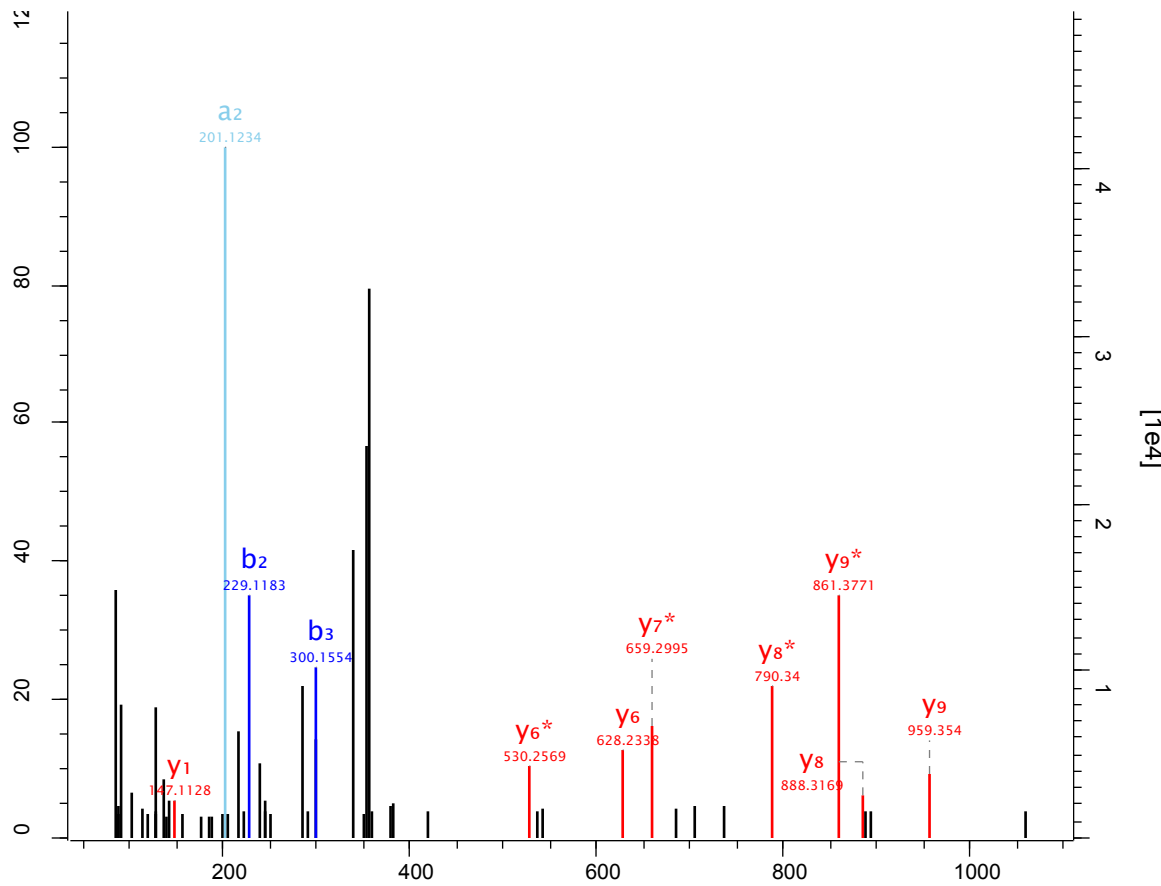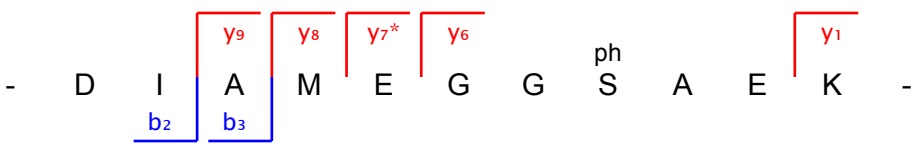

Raw file Scan Method Score m/z  
 2013\_COL15\_30\_34 10235 FTMS; HCD 58.63 499.24

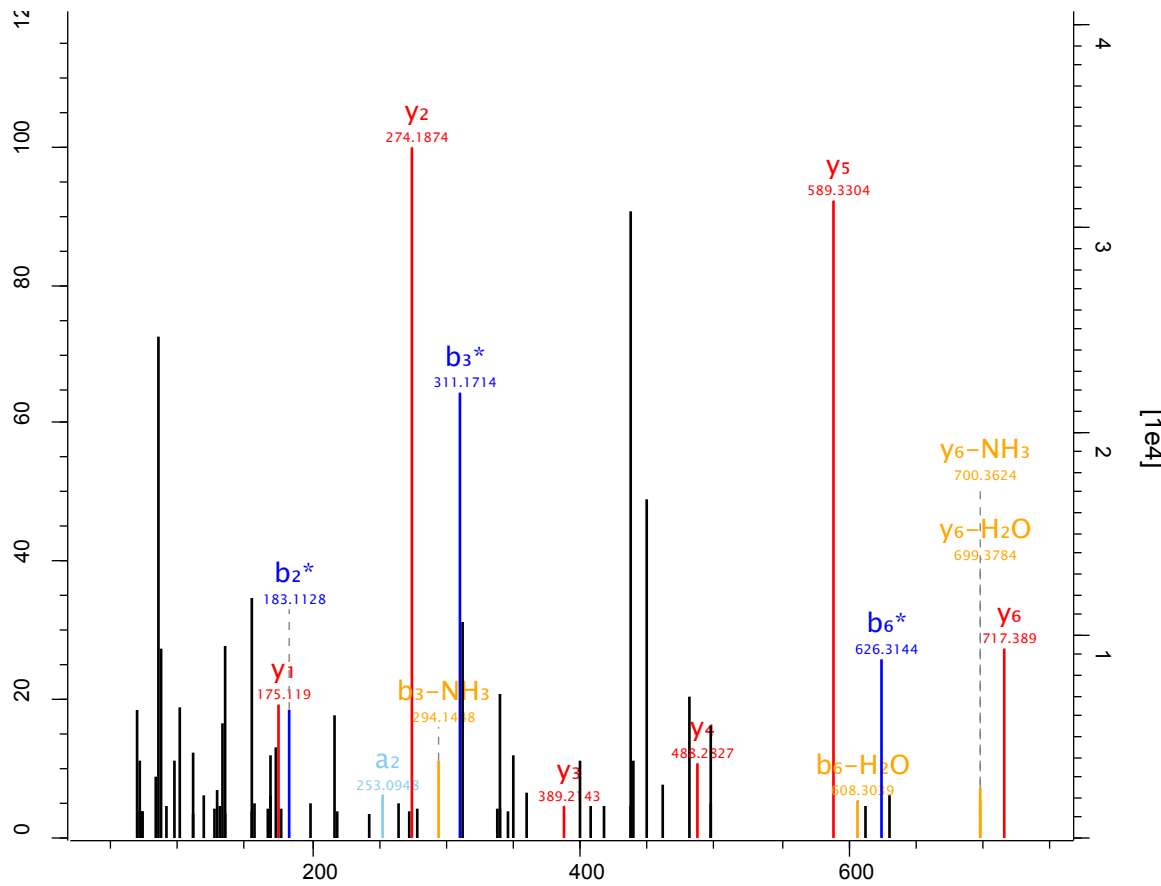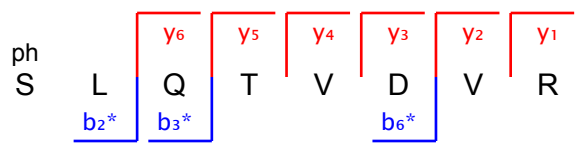



Raw file Scan Method Score m/z  
 2013\_COL15\_30\_34 10299 FTMS; HCD 55.59 733.32

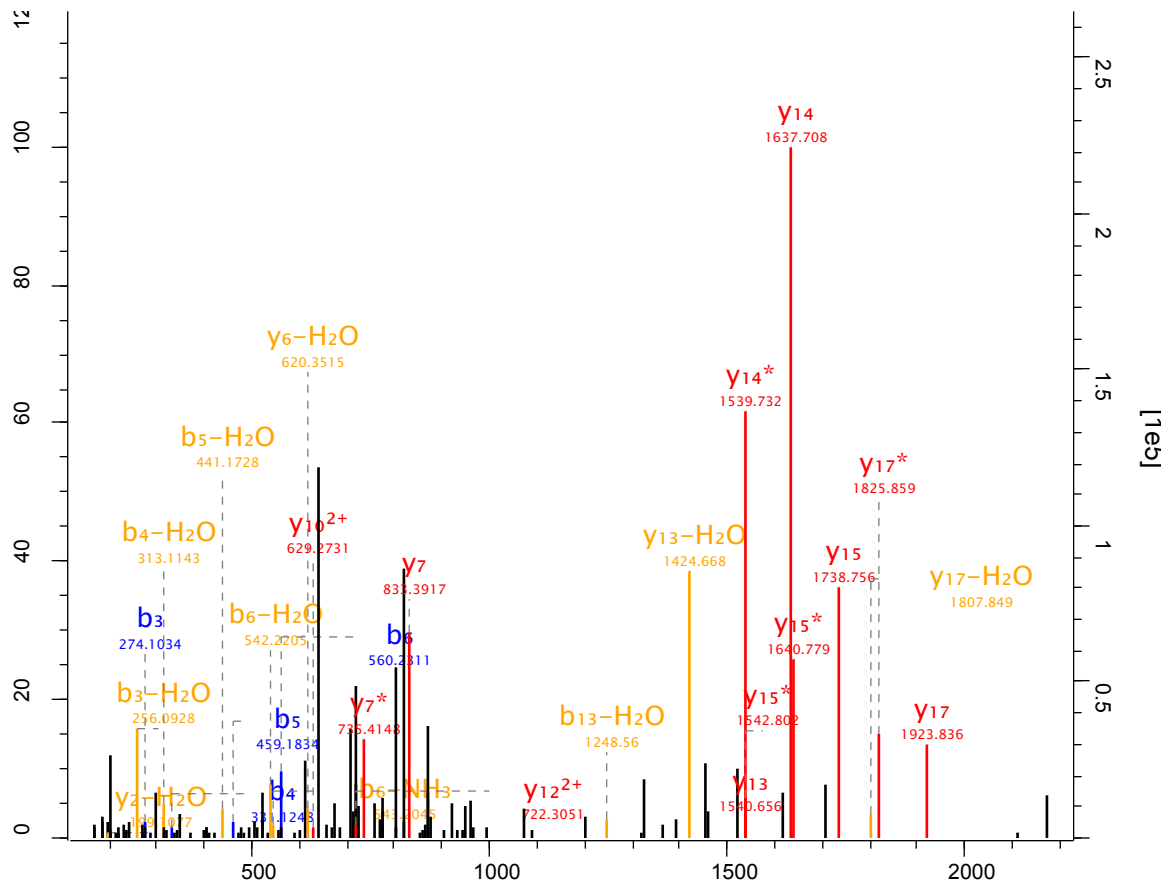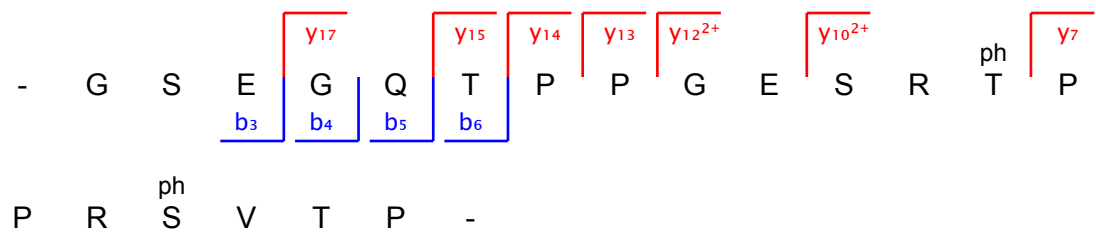

Raw file 2013\_COL15\_30\_34 Scan 10375 Method FTMS; HCD Score 104.76 m/z 527.24

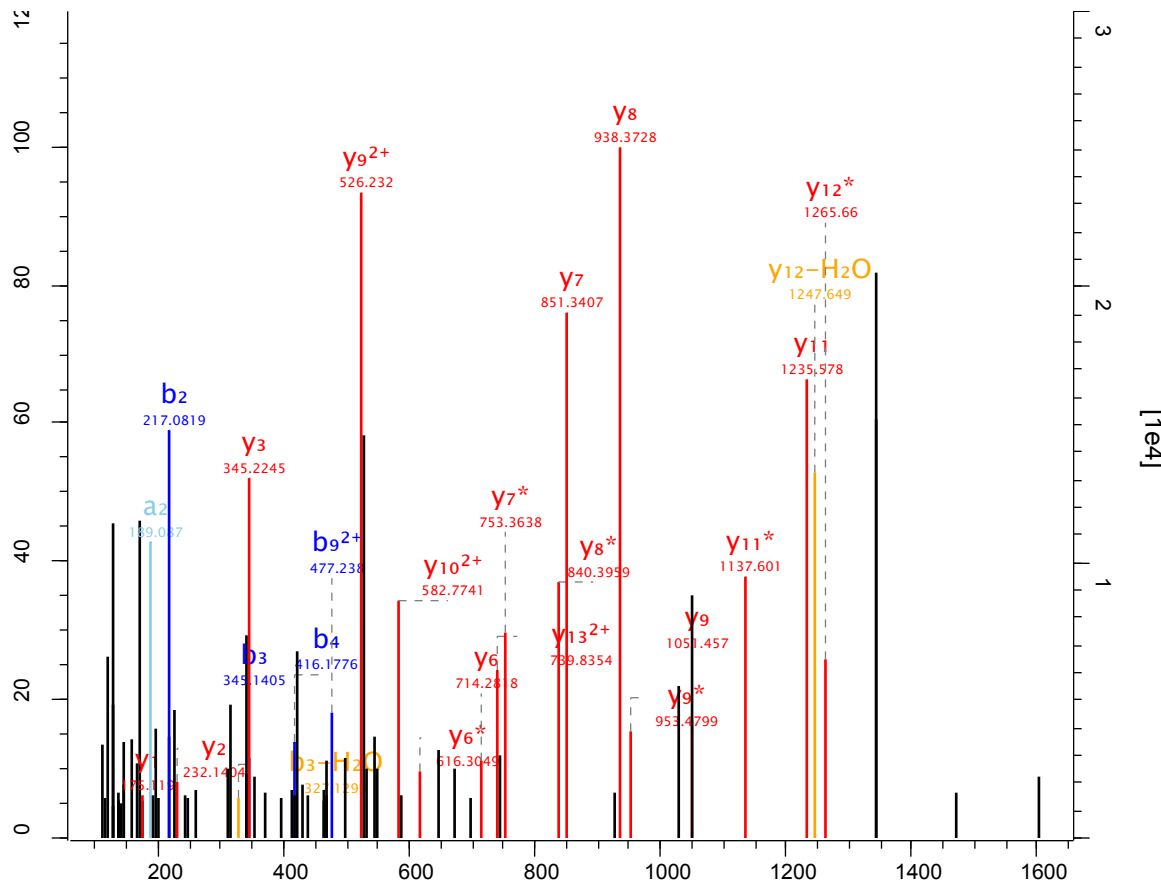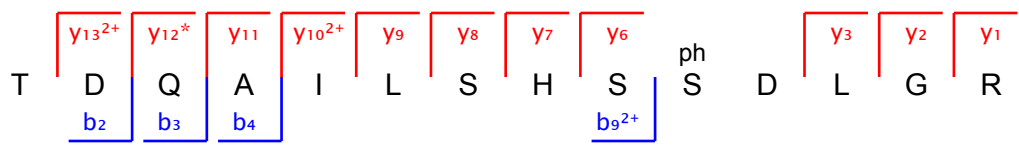

Raw file Scan Method Score m/z  
 2013\_COL15\_30\_34 10394 FTMS; HCD 50.9 486.89

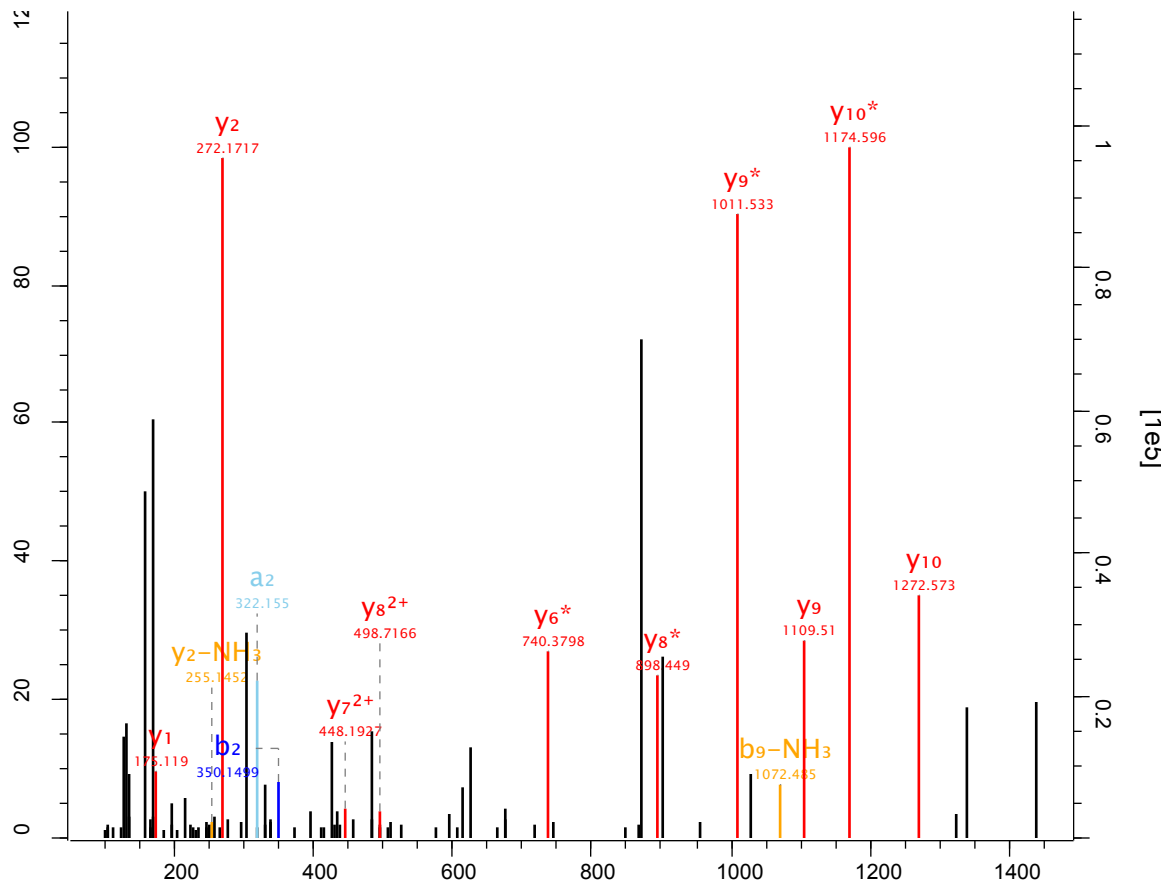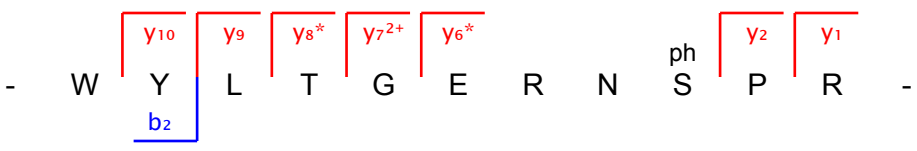

Raw file Scan Method Score m/z  
 2013\_COL15\_30\_34 10473 FTMS; HCD 100.62 666.92

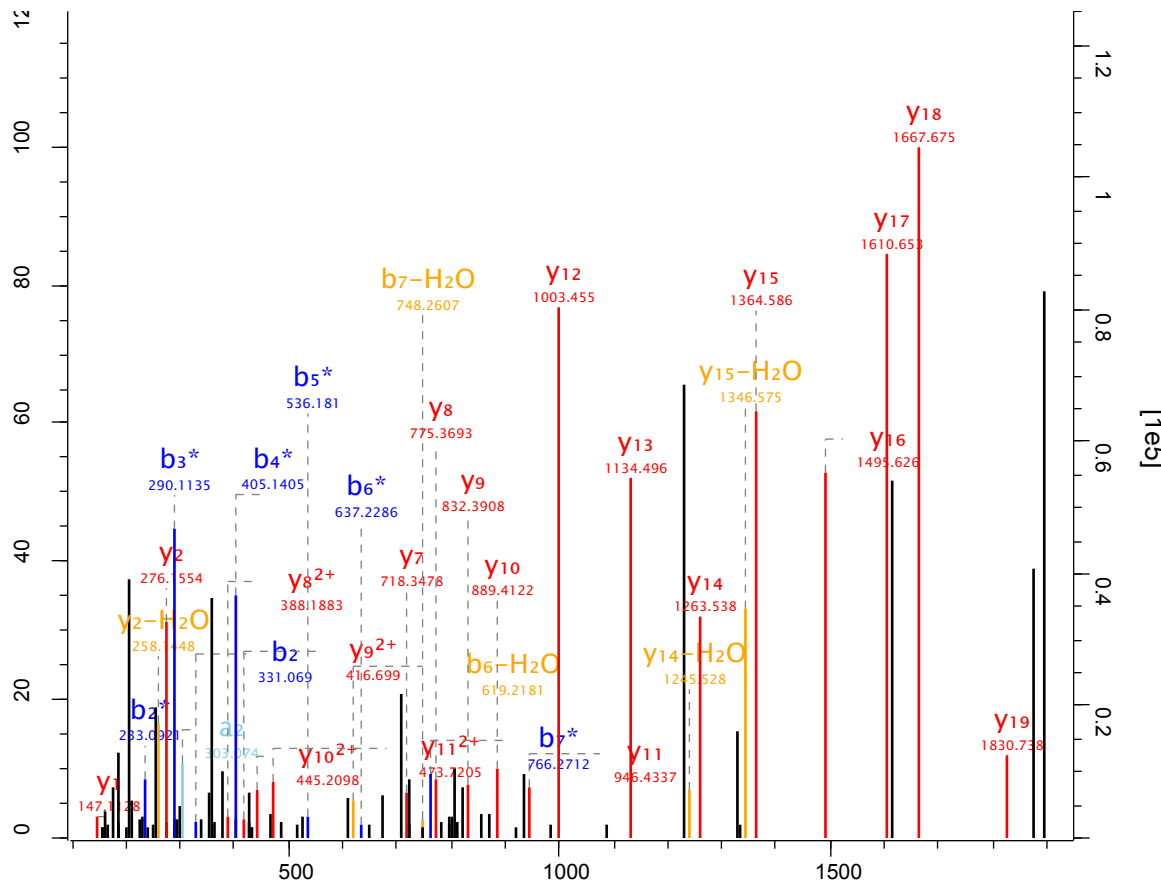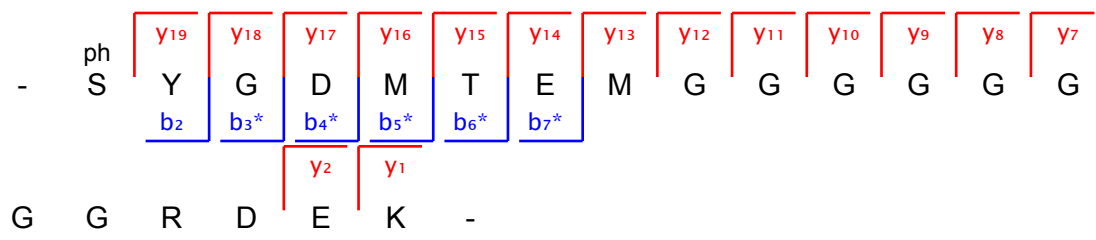



Raw file Scan Method Score m/z  
 2013\_COL15\_30\_34 10543 FTMS; HCD 57.59 438.19

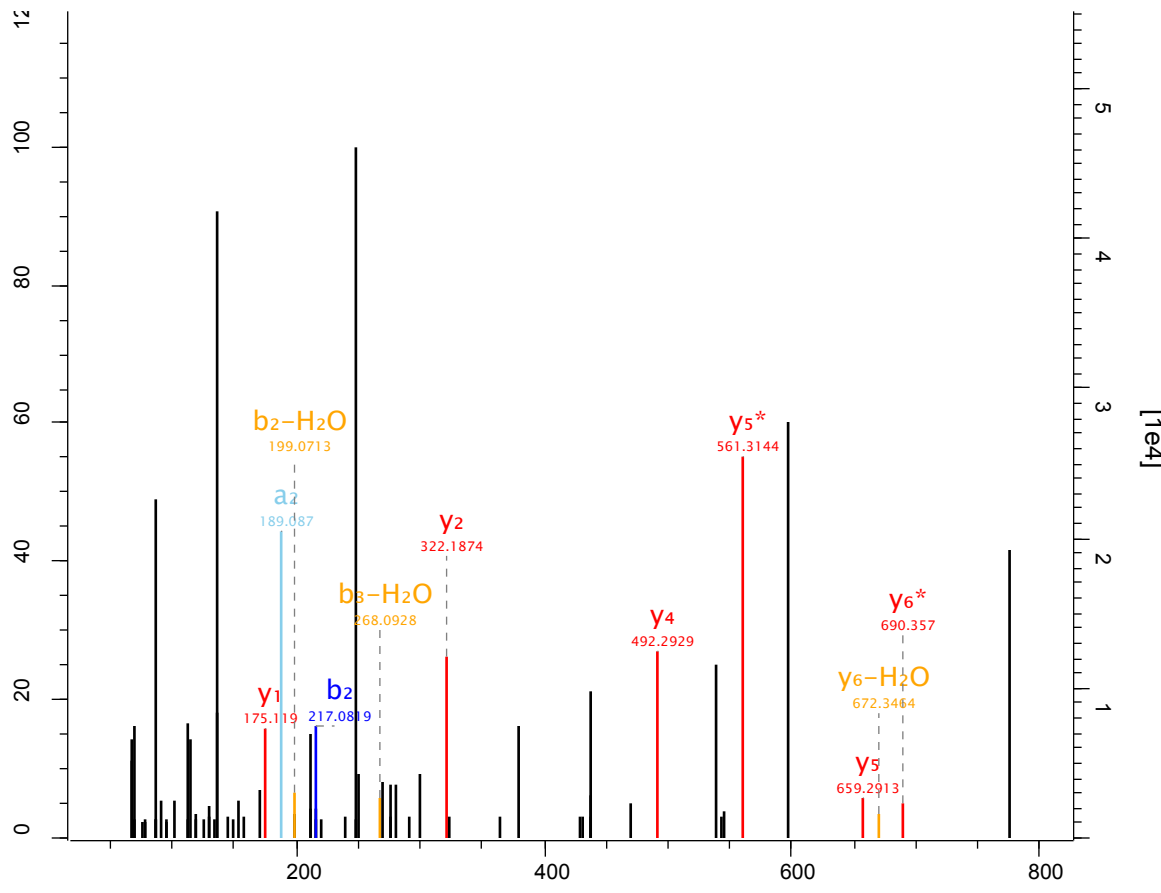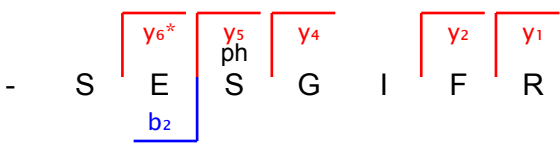

Raw file Scan Method Score m/z  
 2013\_COL15\_30\_34 10648 FTMS; HCD 139.9 781.31

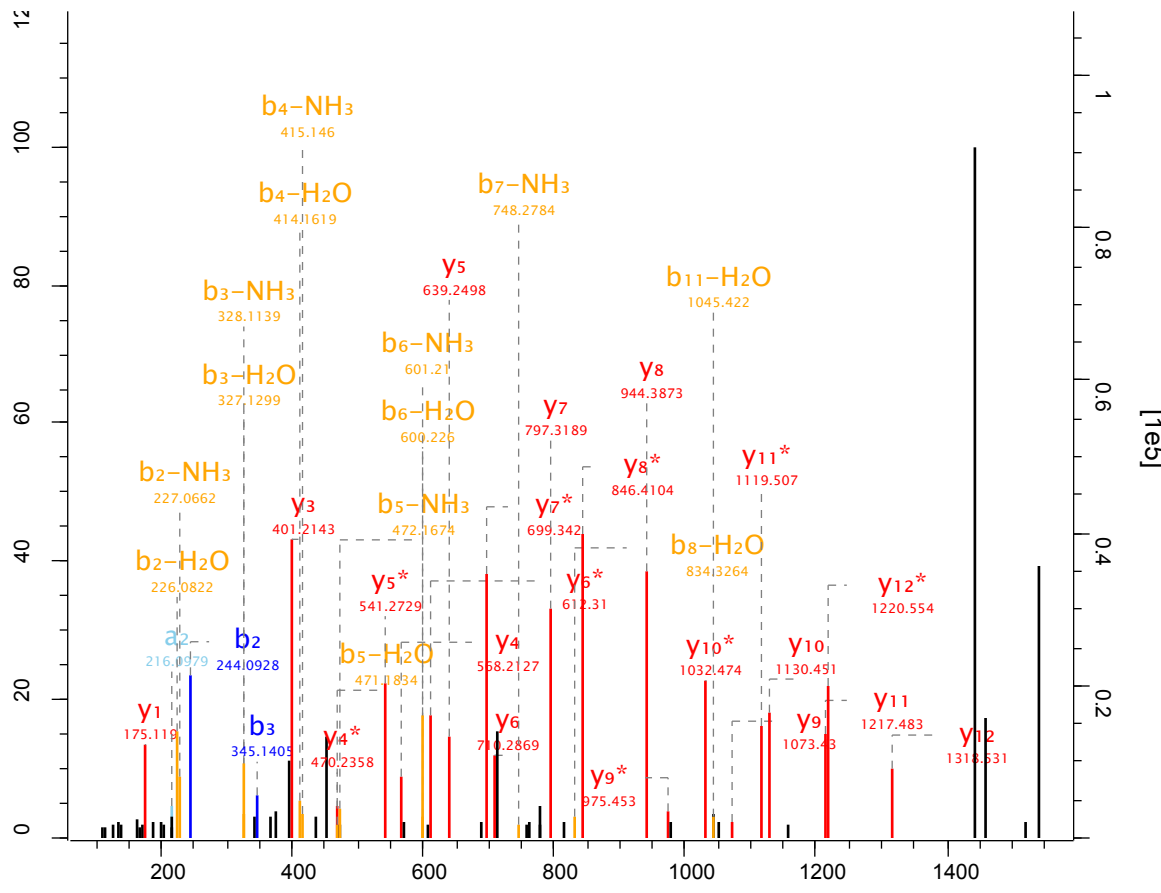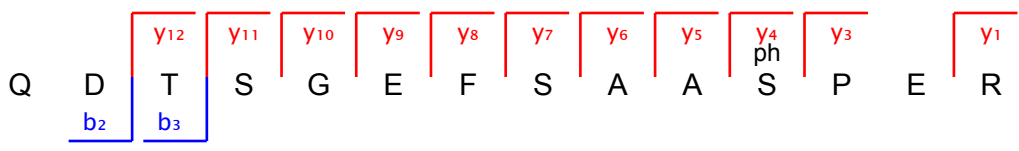

| Raw file         | Scan  | Method    | Score | m/z    |
|------------------|-------|-----------|-------|--------|
| 2013_COL15_30_34 | 10731 | FTMS; HCD | 55.45 | 653.92 |

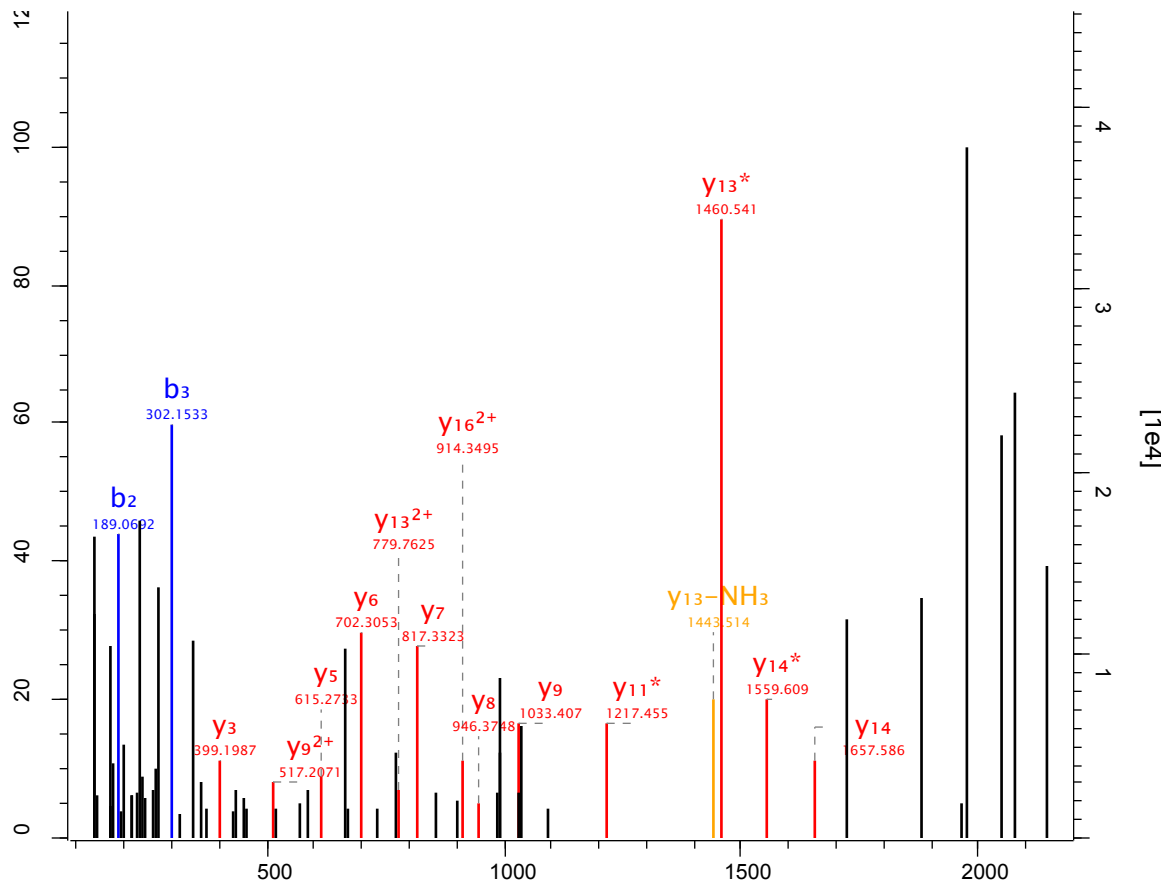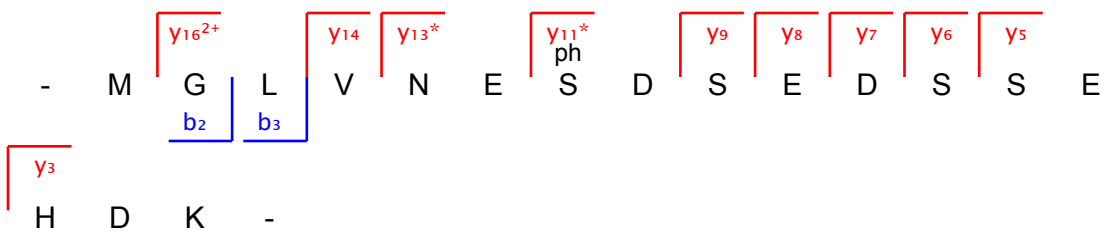

Raw file Scan Method Score m/z  
 2013\_COL15\_30\_34 10779 FTMS; HCD 54.76 596.93

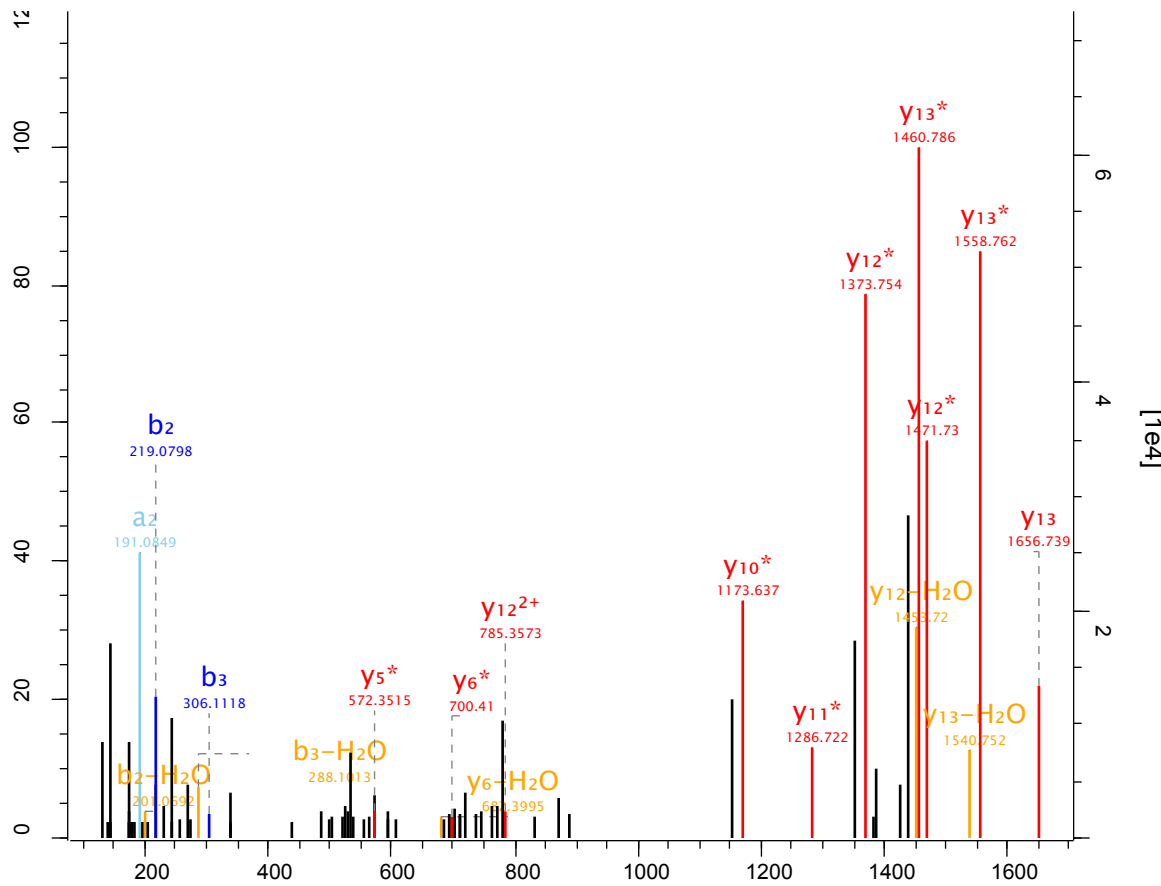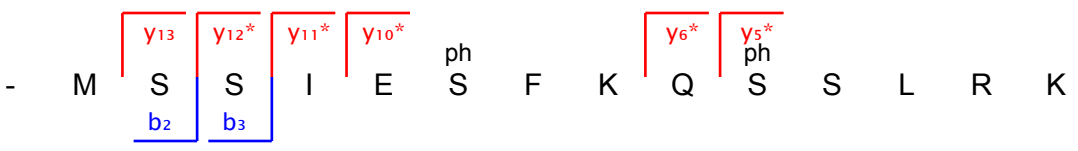

| Raw file         | Scan  | Method    | Score | m/z    |
|------------------|-------|-----------|-------|--------|
| 2013_COL15_30_34 | 10828 | FTMS; HCD | 85.67 | 445.19 |

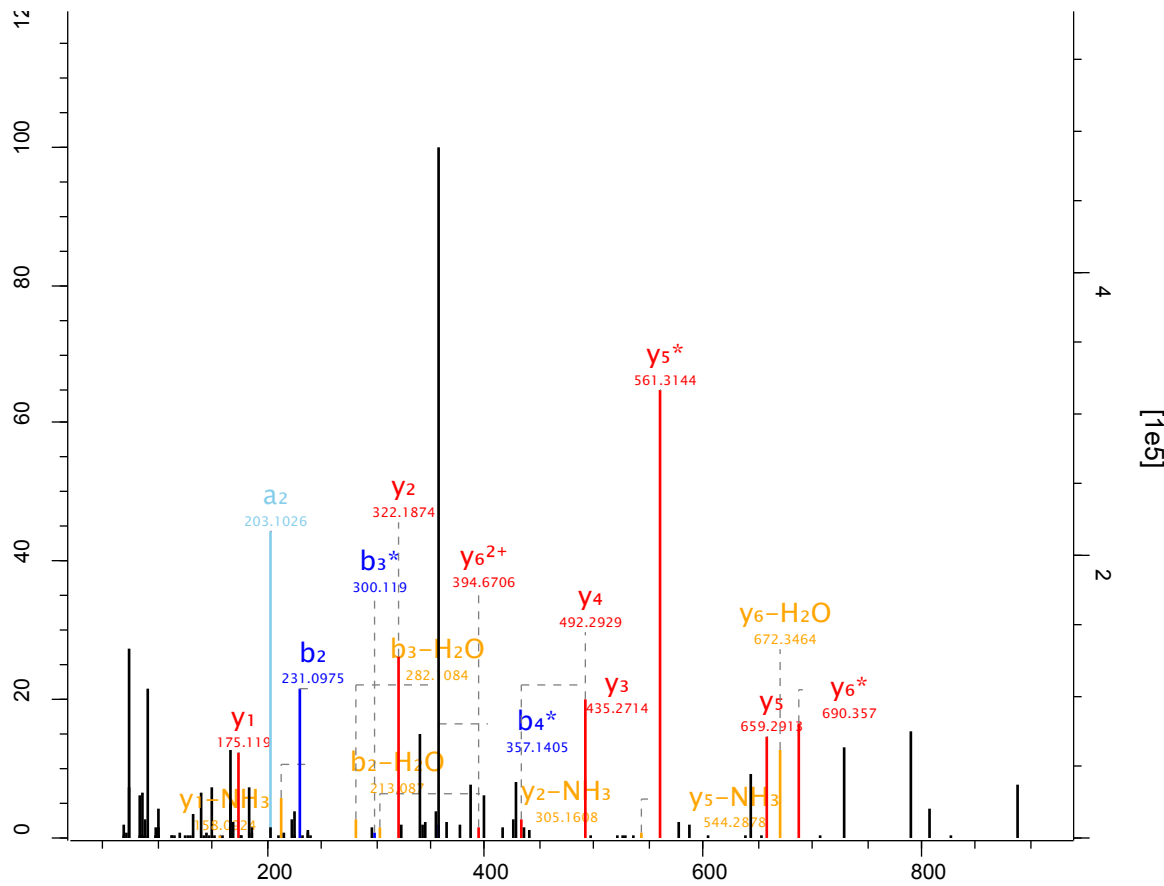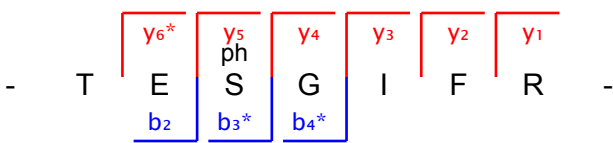

Raw file Scan Method Score m/z  
 2013\_COL15\_30\_34 1096 FTMS; HCD 56.42 590.25

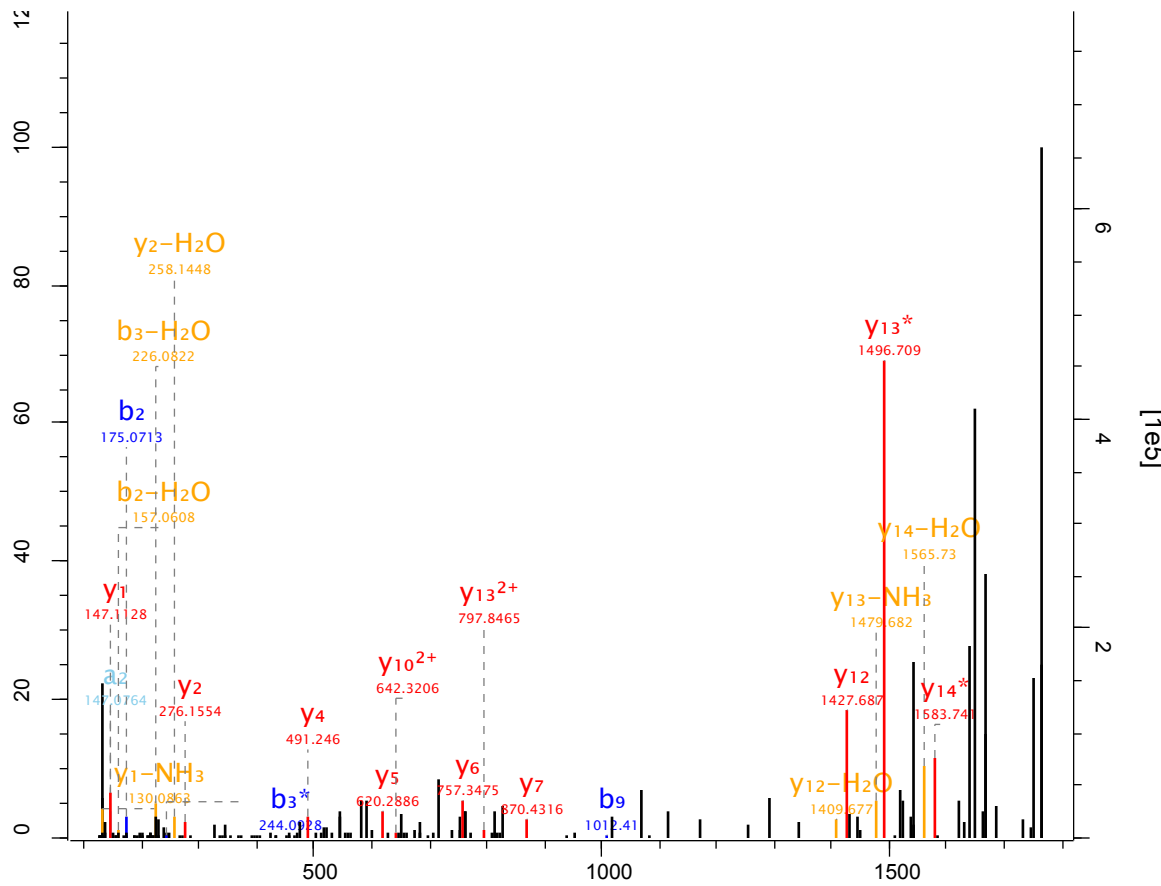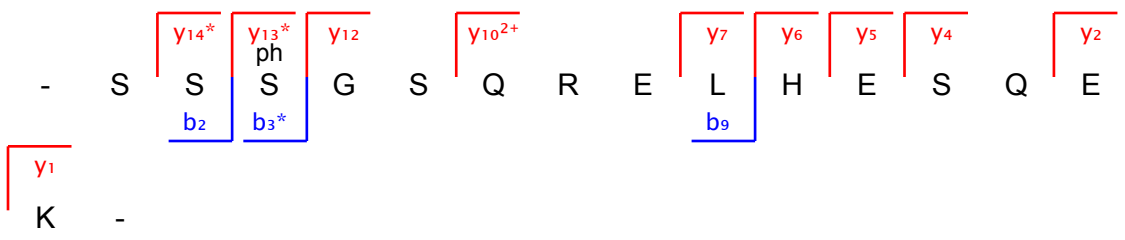

| Raw file         | Scan  | Method    | Score | m/z    |
|------------------|-------|-----------|-------|--------|
| 2013_COL15_30_34 | 11006 | FTMS; HCD | 43.08 | 461.19 |

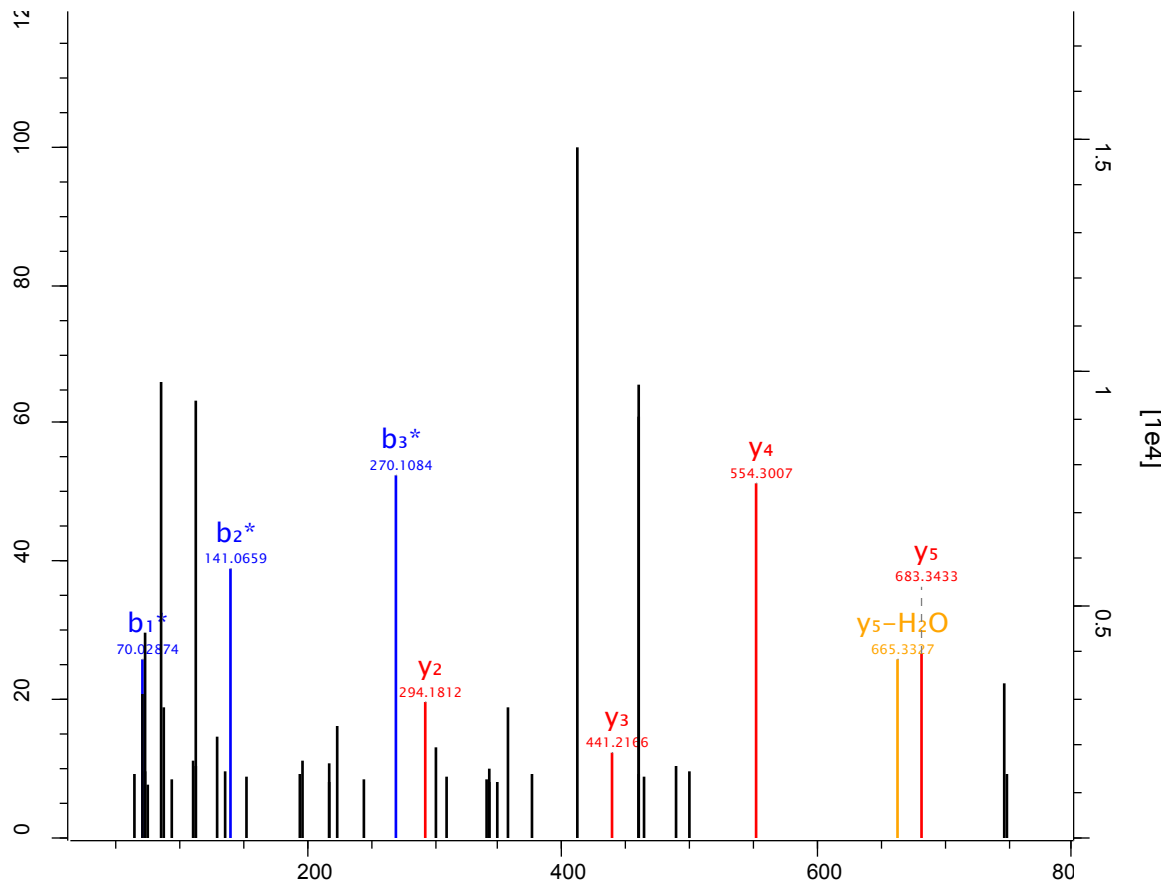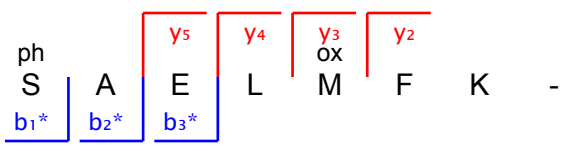

| Raw file         | Scan | Method    | Score | m/z    |
|------------------|------|-----------|-------|--------|
| 2013_COL15_30_34 | 1109 | FTMS; HCD | 40.97 | 510.56 |

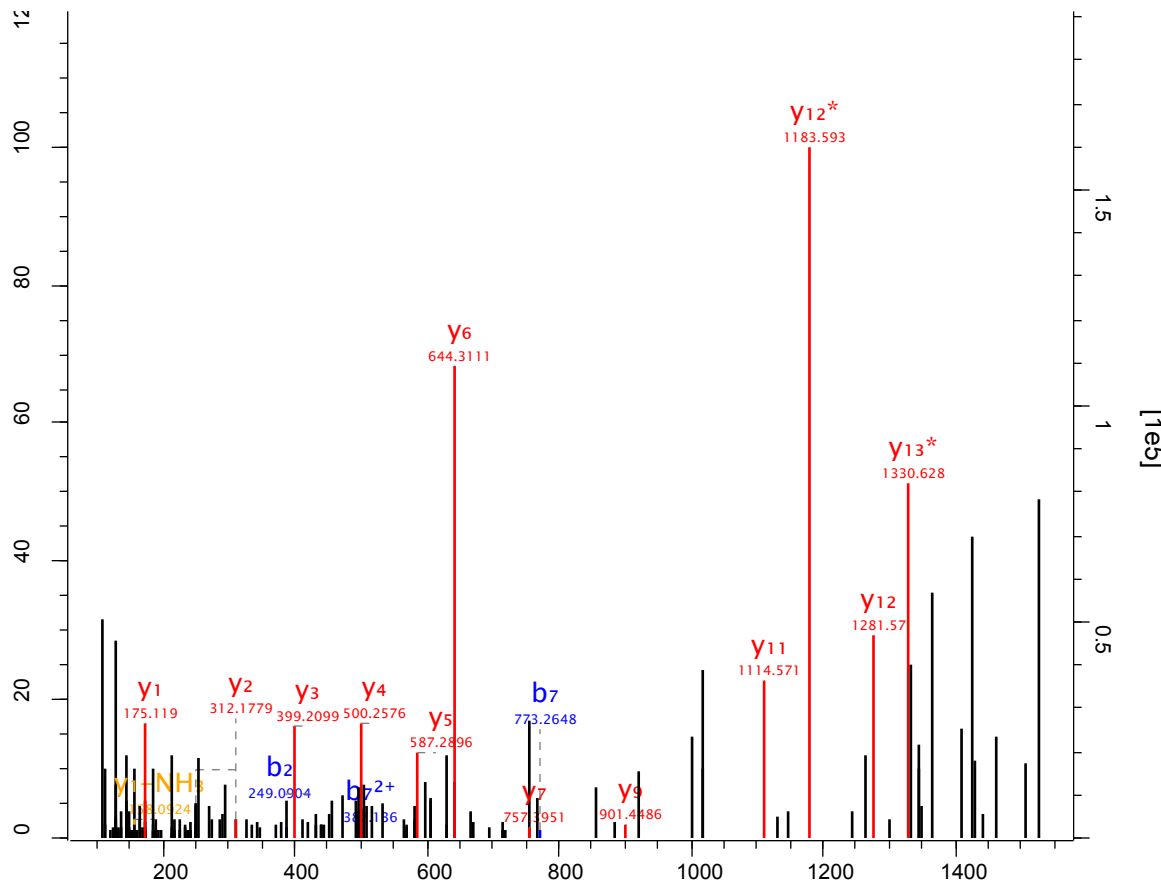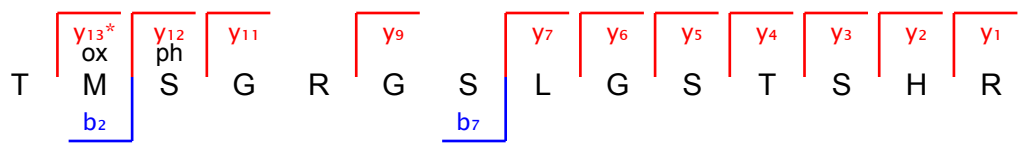



Raw file Scan Method Score m/z  
 2013\_COL15\_30\_34 11191 FTMS; HCD 50.35 580.74

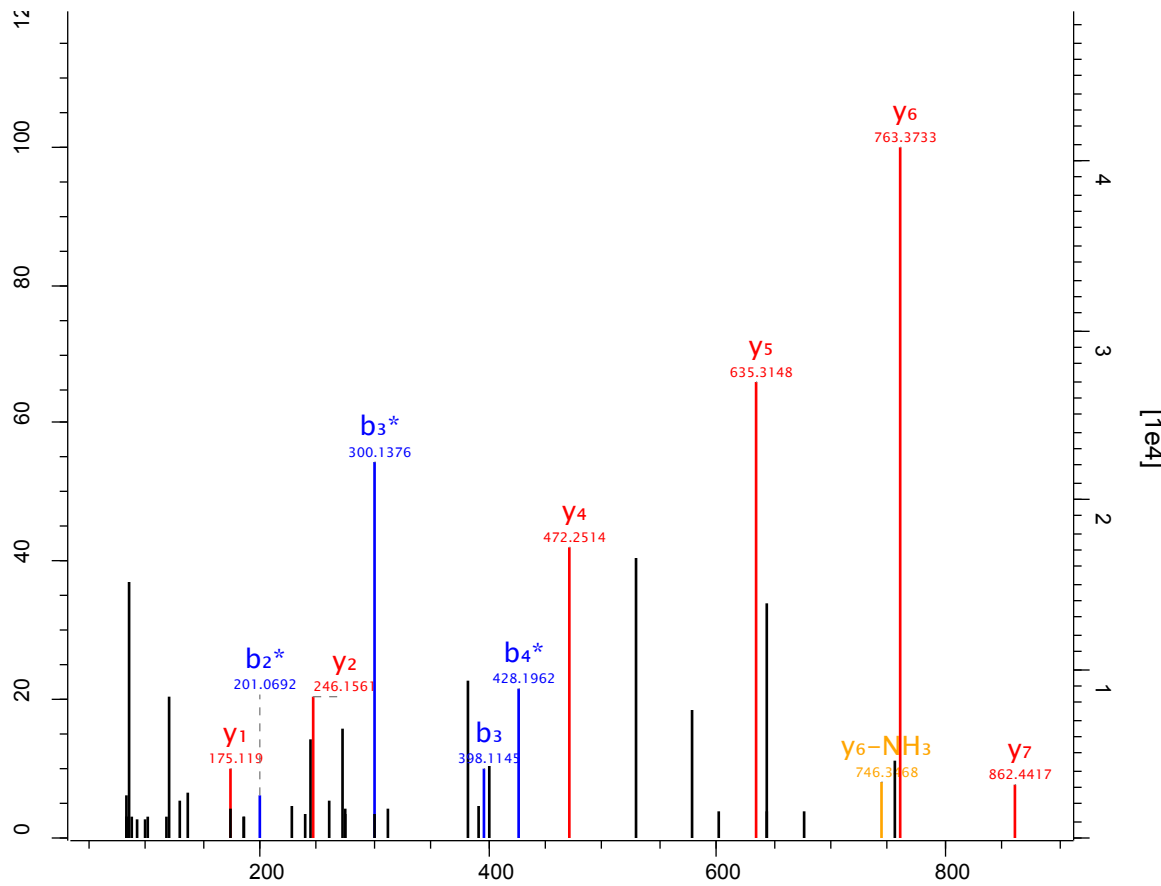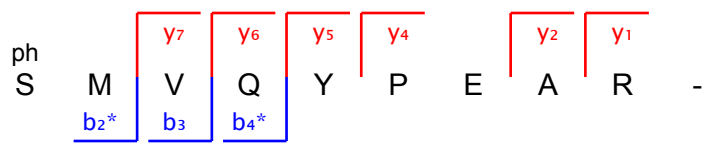

Raw file 2013\_COL15\_30\_34 Scan 11413 Method FTMS; HCD Score 61.17 m/z 646.32

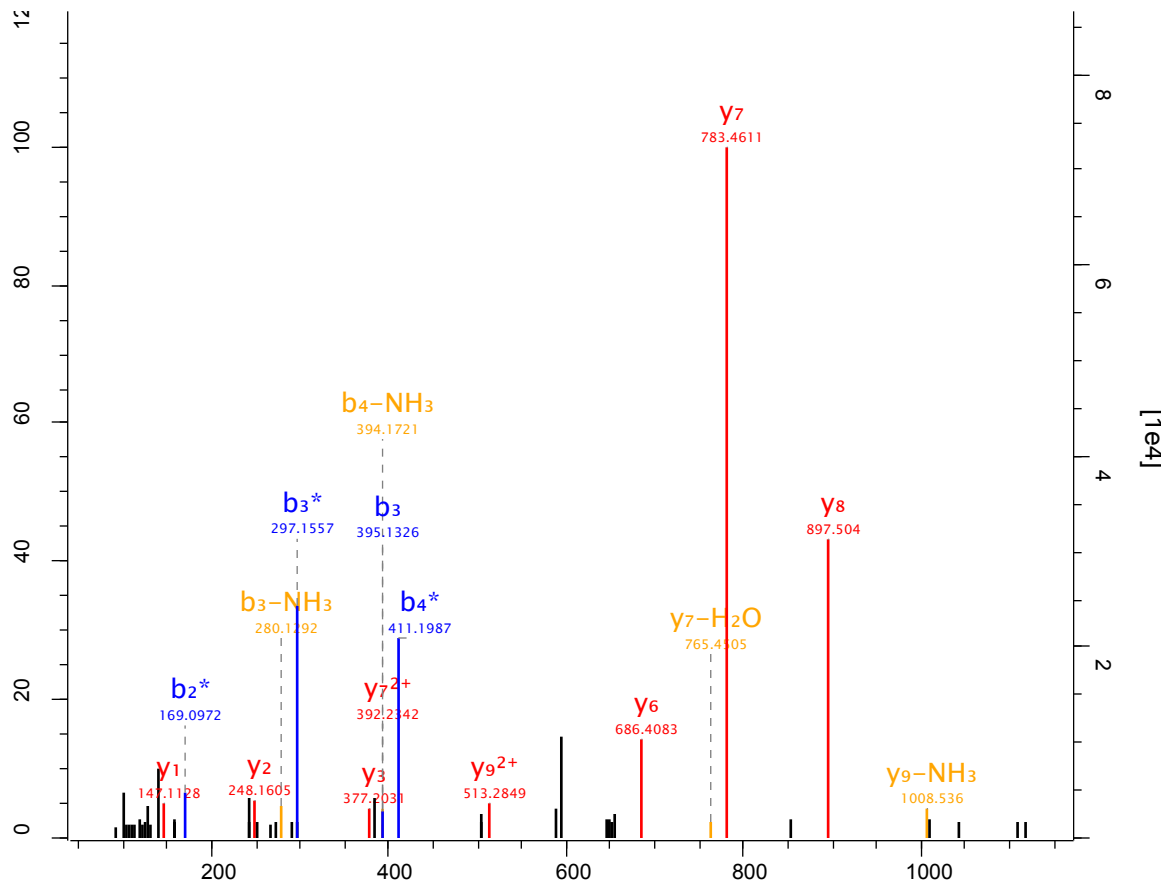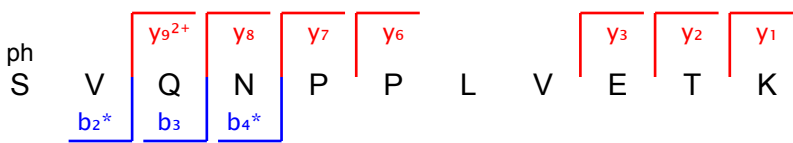

| Raw file         | Scan | Method    | Score | m/z    |
|------------------|------|-----------|-------|--------|
| 2013_COL15_30_34 | 1159 | FTMS; HCD | 42.03 | 572.92 |

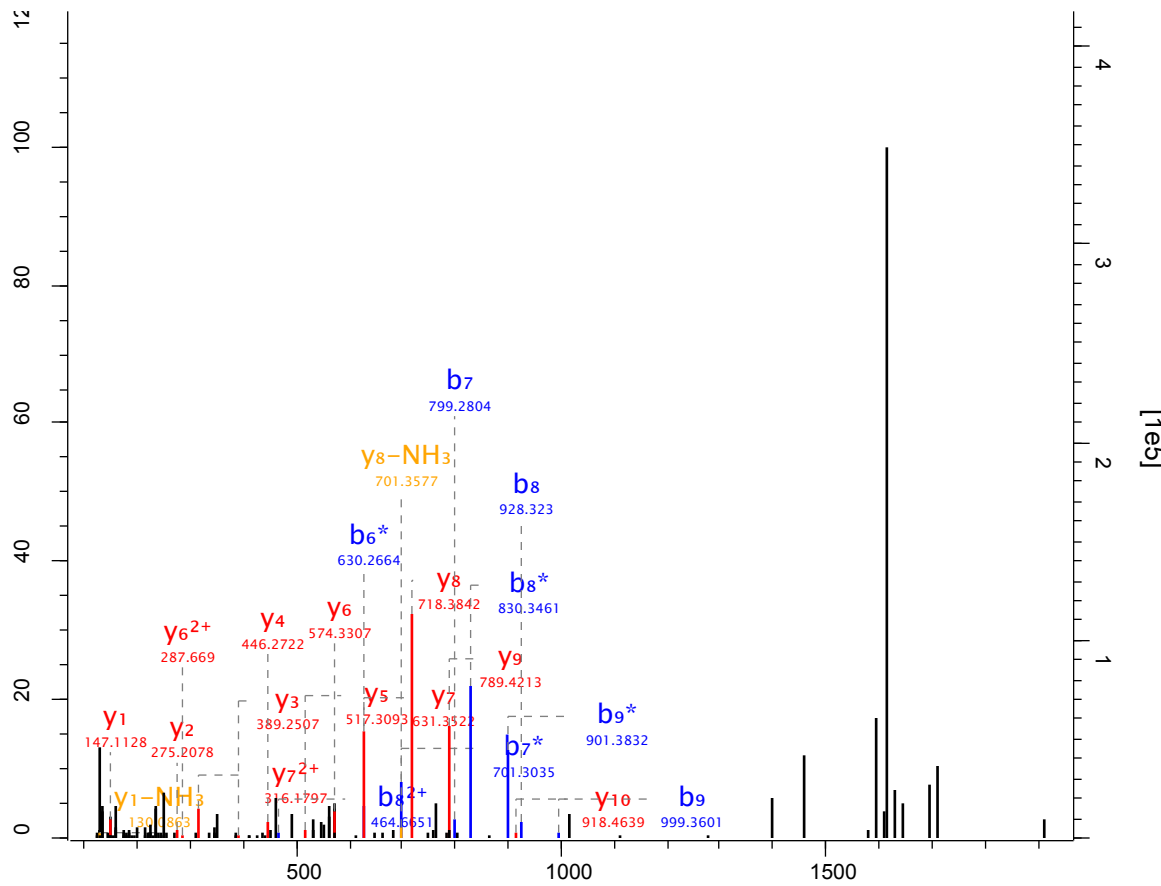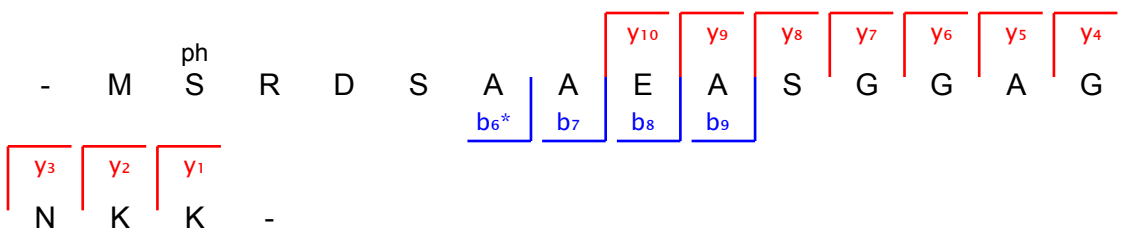

Raw file Scan Method Score m/z  
 2013\_COL15\_30\_34 11810 FTMS; HCD 56.51 497.89

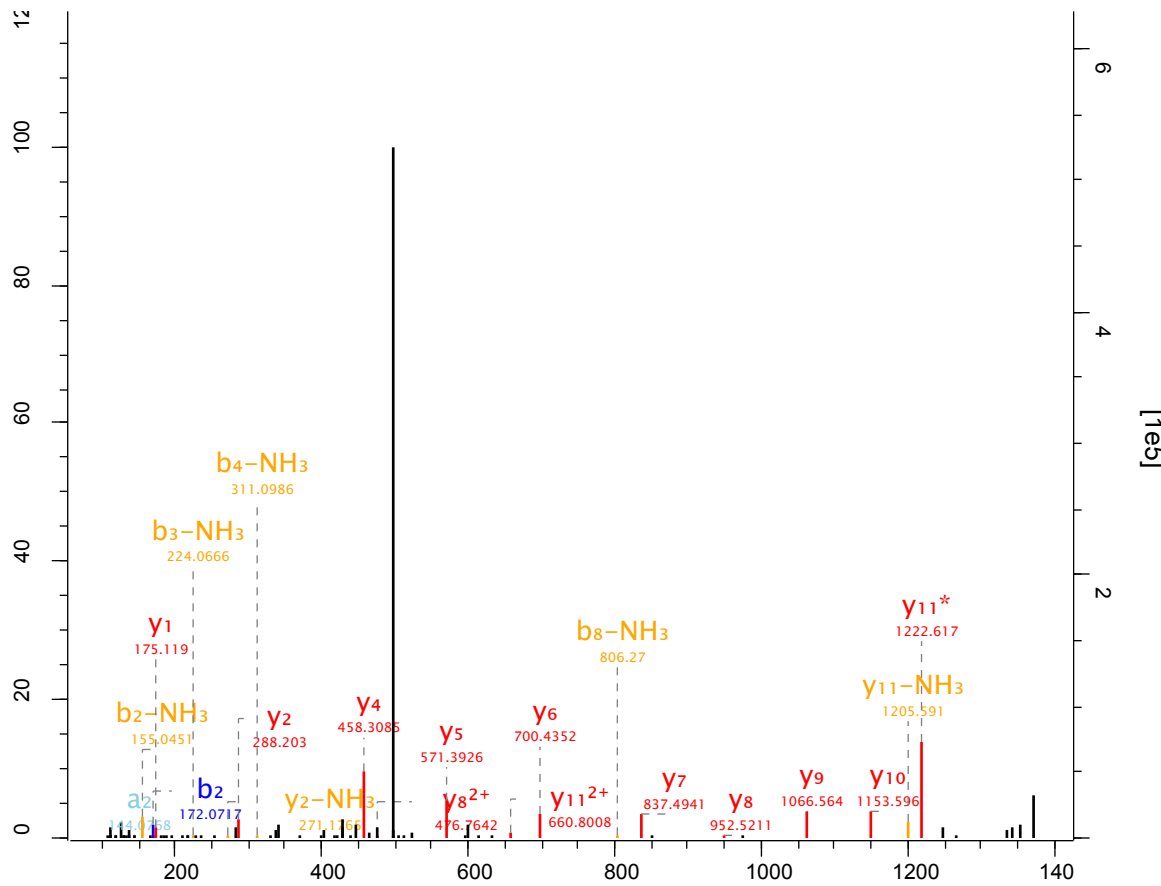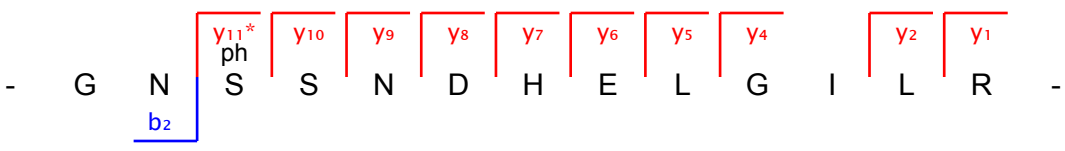

| Raw file         | Scan | Method    | Score | m/z    |
|------------------|------|-----------|-------|--------|
| 2013_COL15_30_34 | 1193 | FTMS; HCD | 48.5  | 591.59 |

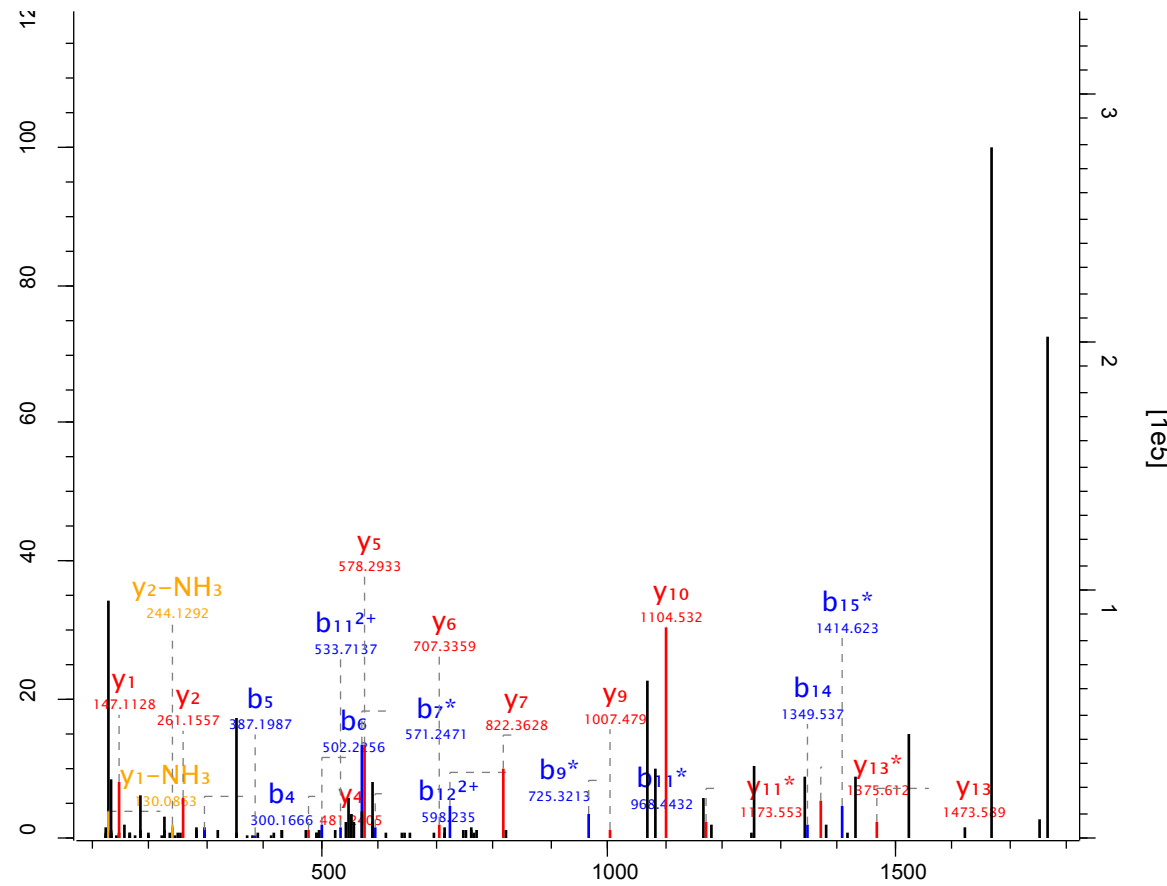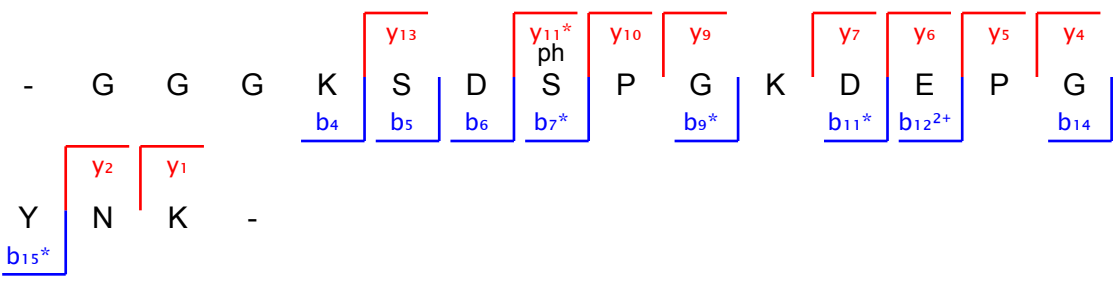

Raw file 2013\_COL15\_30\_34 Scan 12067 Method FTMS; HCD Score 70.32 m/z 692.96

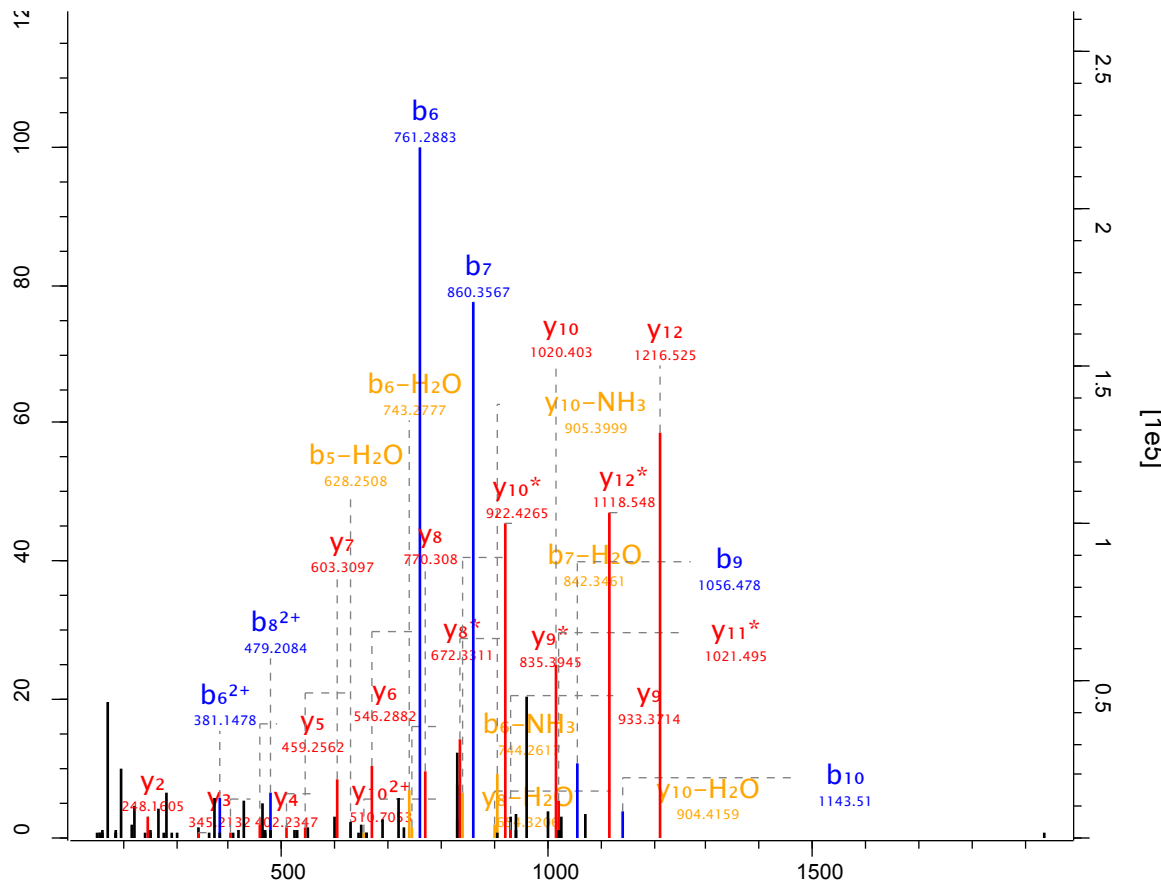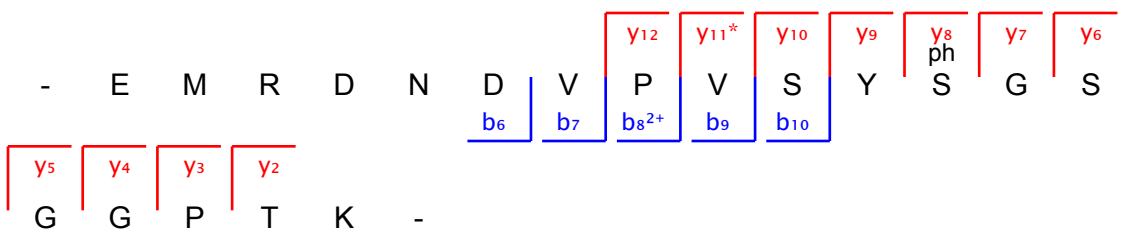

Raw file Scan Method Score m/z  
 2013\_COL15\_30\_34 12070 FTMS; HCD 85.94 620.6

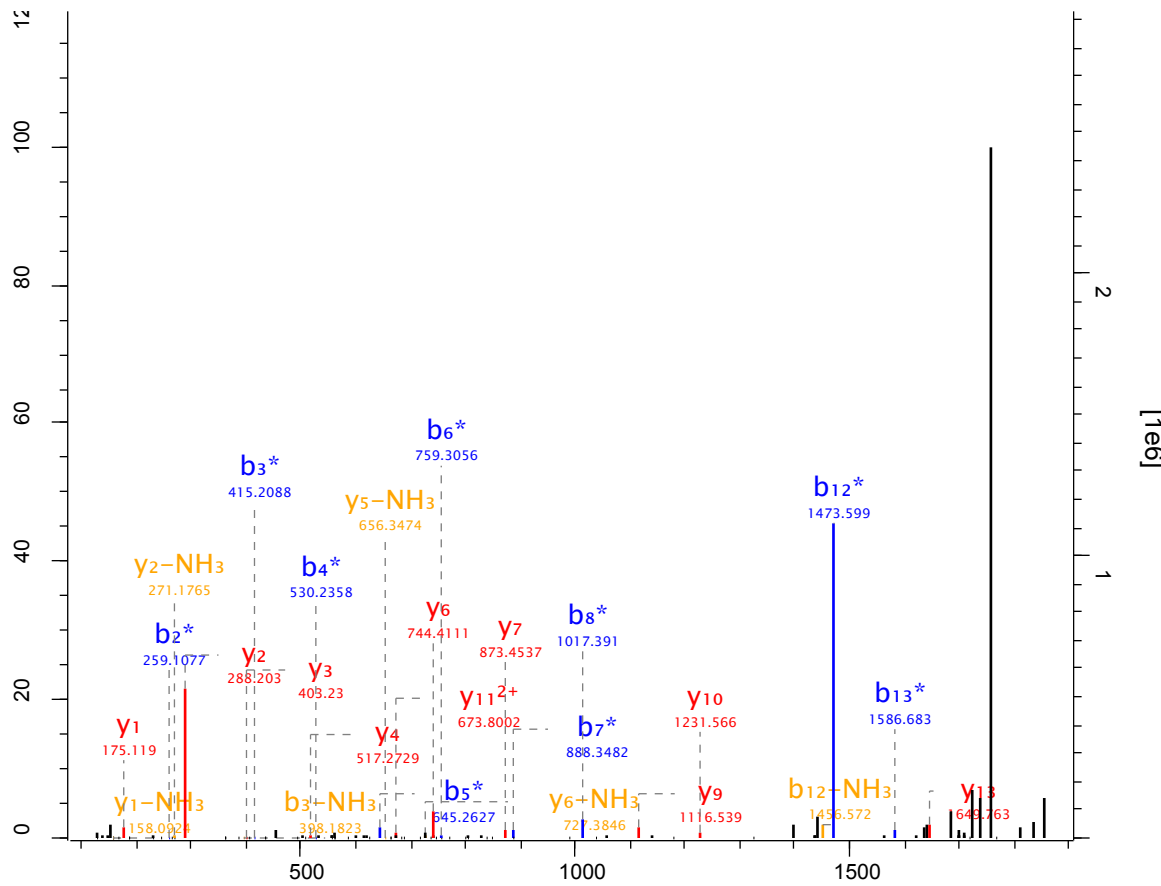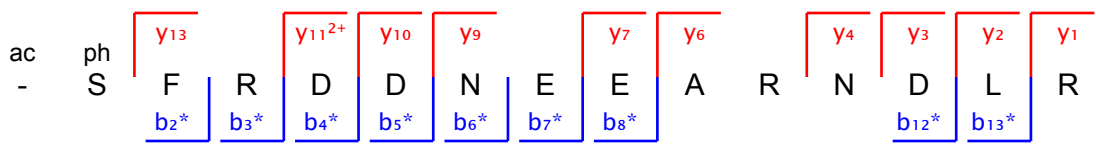

Raw file Scan Method Score m/z  
 2013\_COL15\_30\_34 12084 FTMS; HCD 188.08 953.77

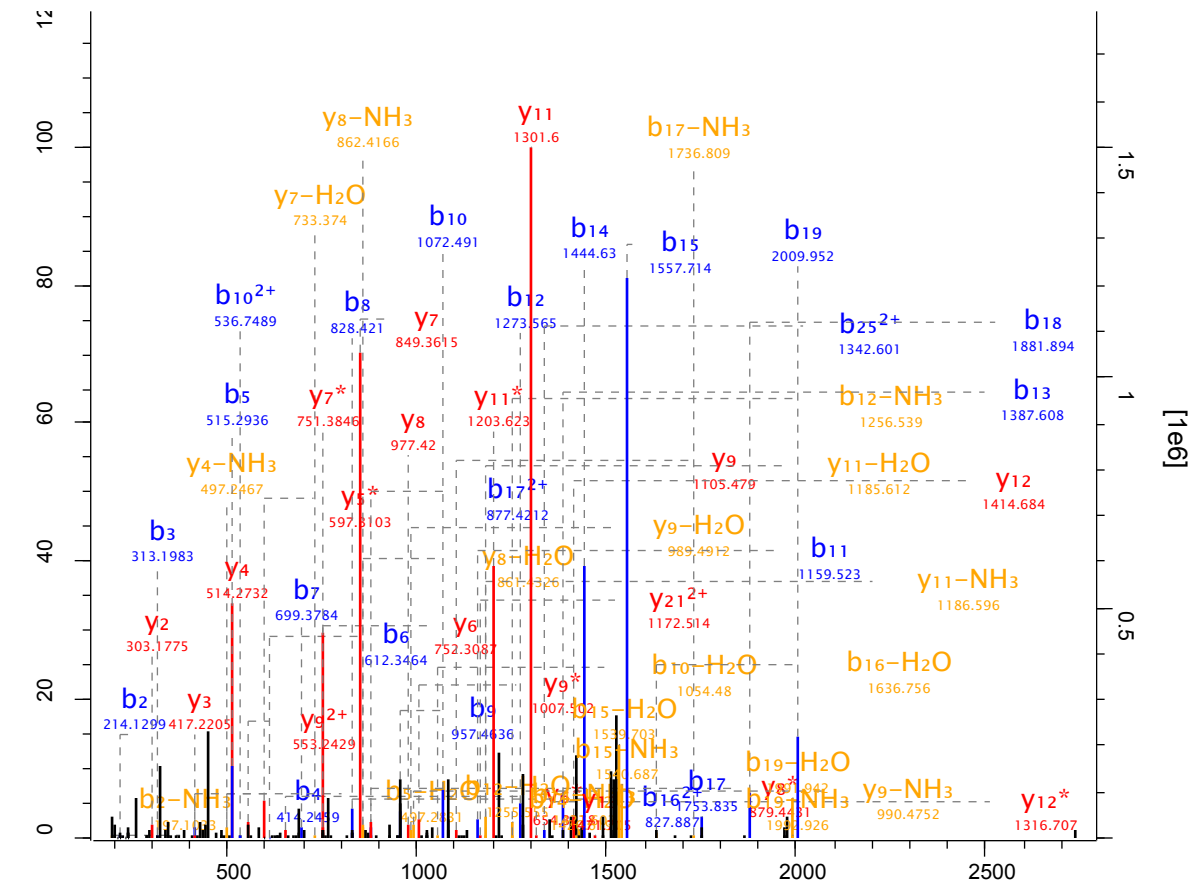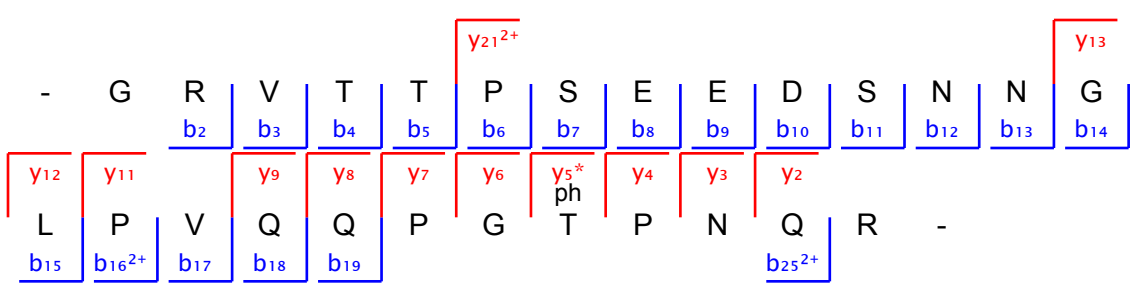



Raw file Scan Method Score m/z  
 2013\_COL15\_30\_34 12157 FTMS; HCD 103.9 632.28

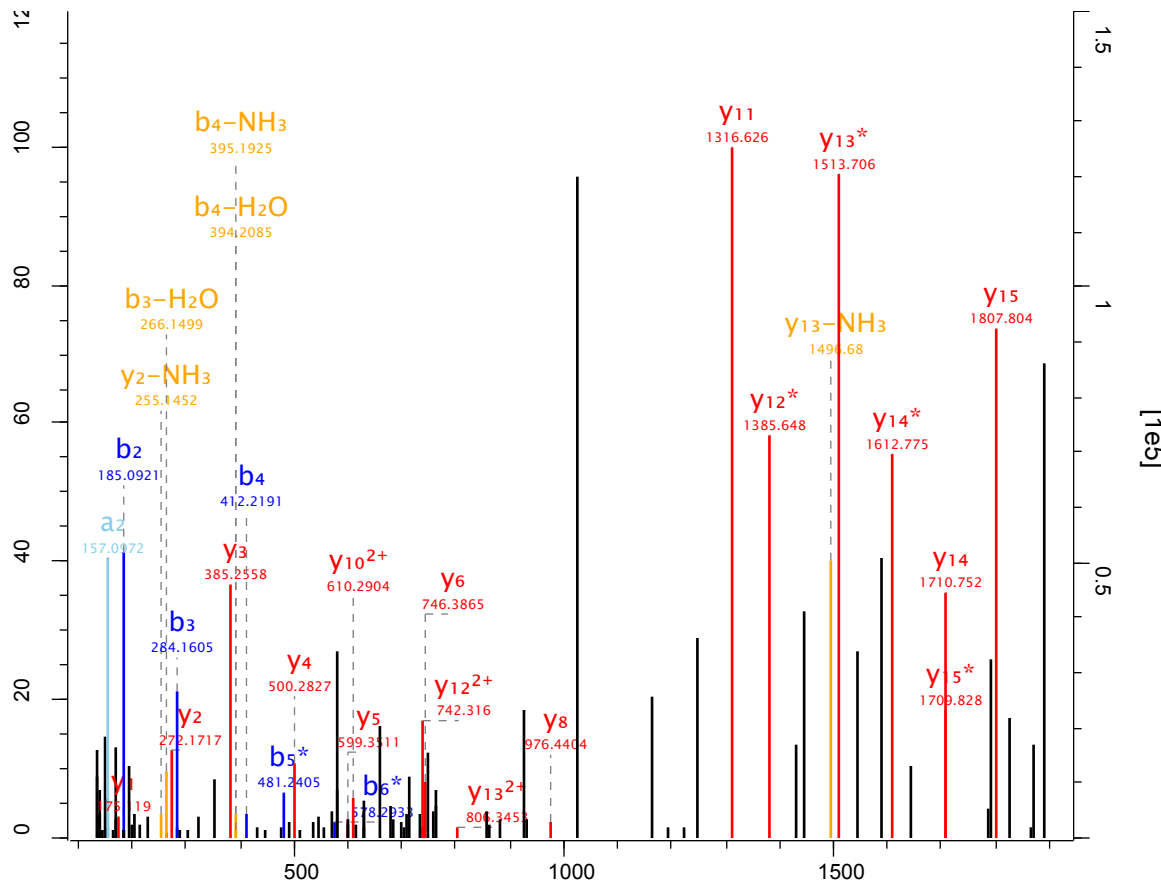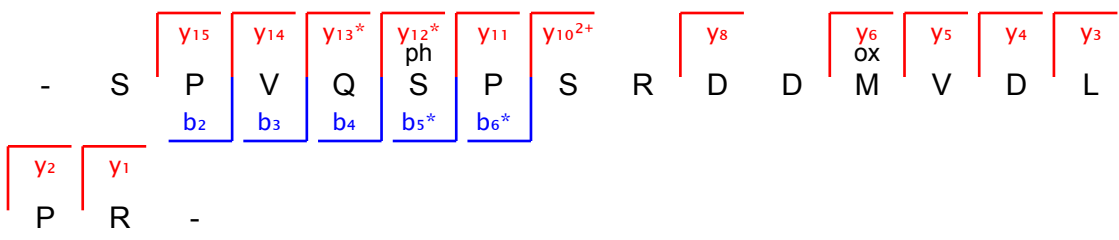

Raw file Scan Method Score m/z  
 2013\_COL15\_30\_34 12243 FTMS; HCD 120.33 664.97

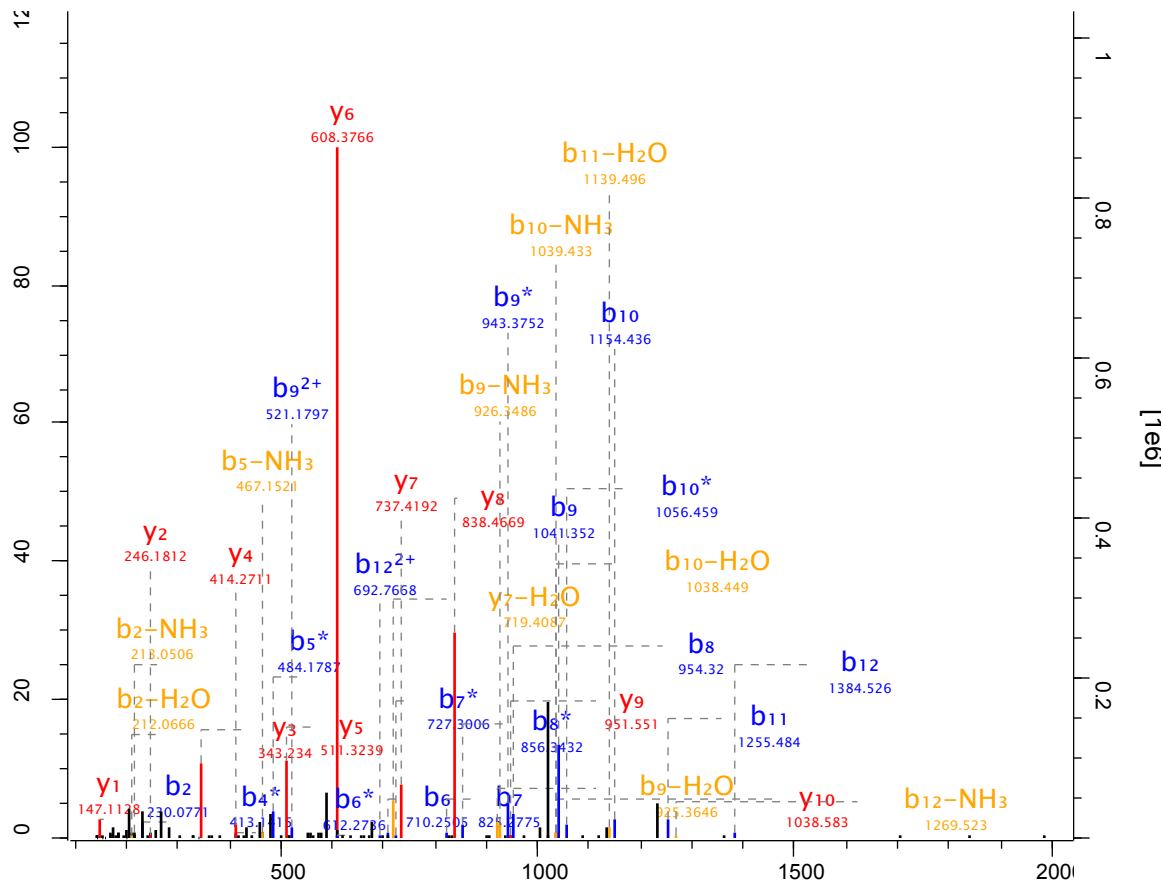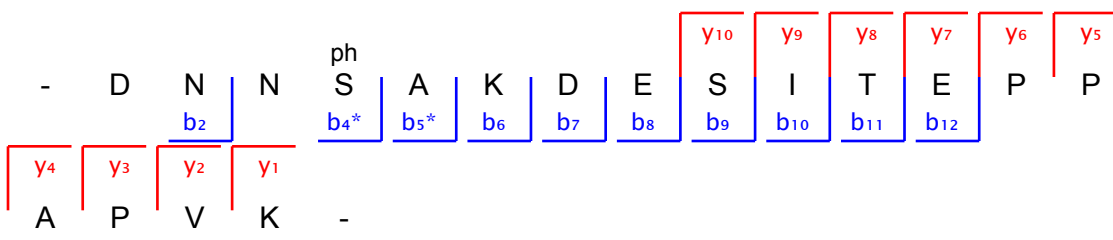

Raw file Scan Method Score m/z  
 2013\_COL15\_30\_34 12265 FTMS; HCD 48.9 689.78

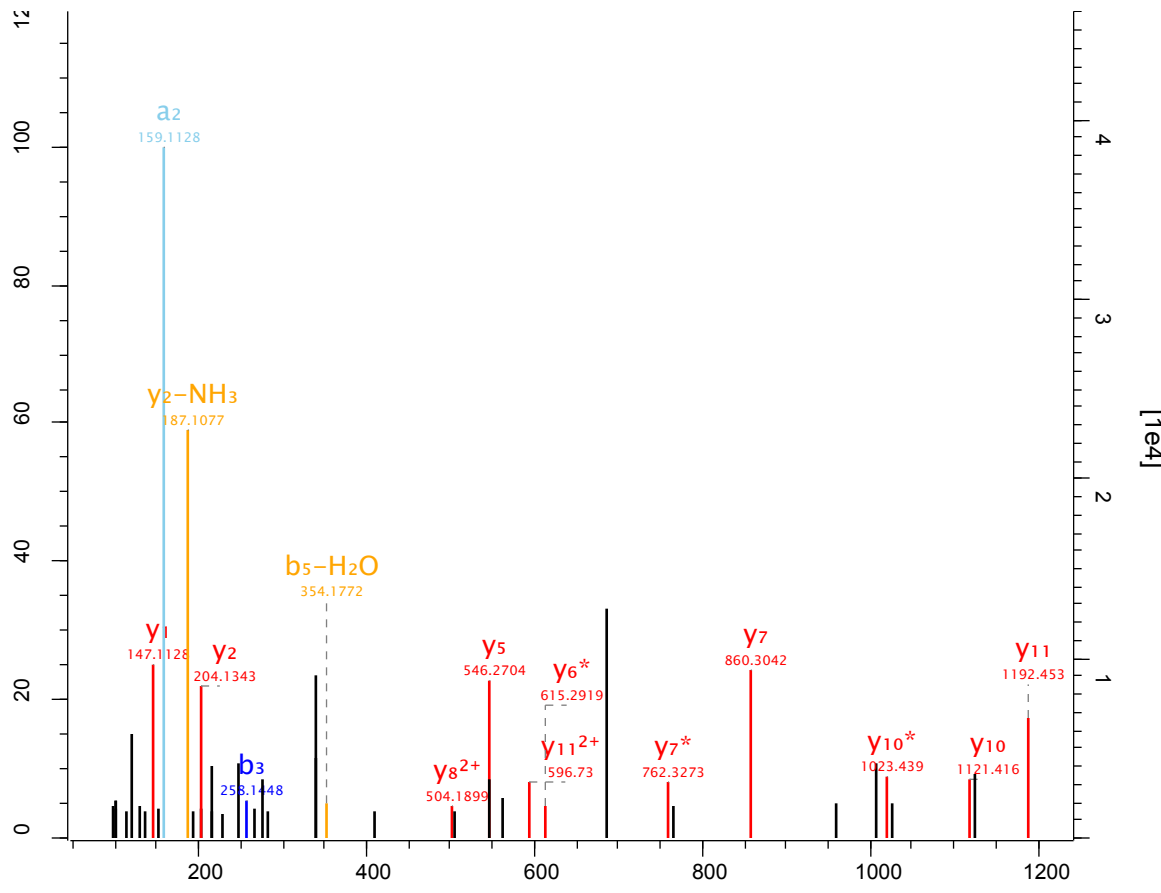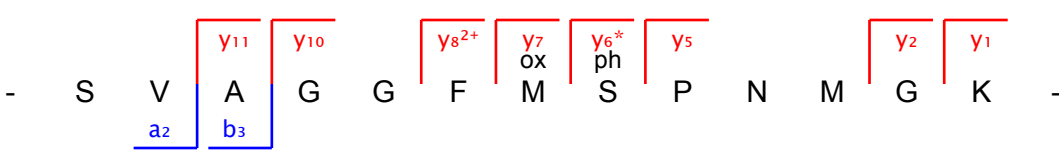

Raw file Scan Method Score m/z  
 2013\_COL15\_30\_34 12556 FTMS; HCD 148.52 634.6

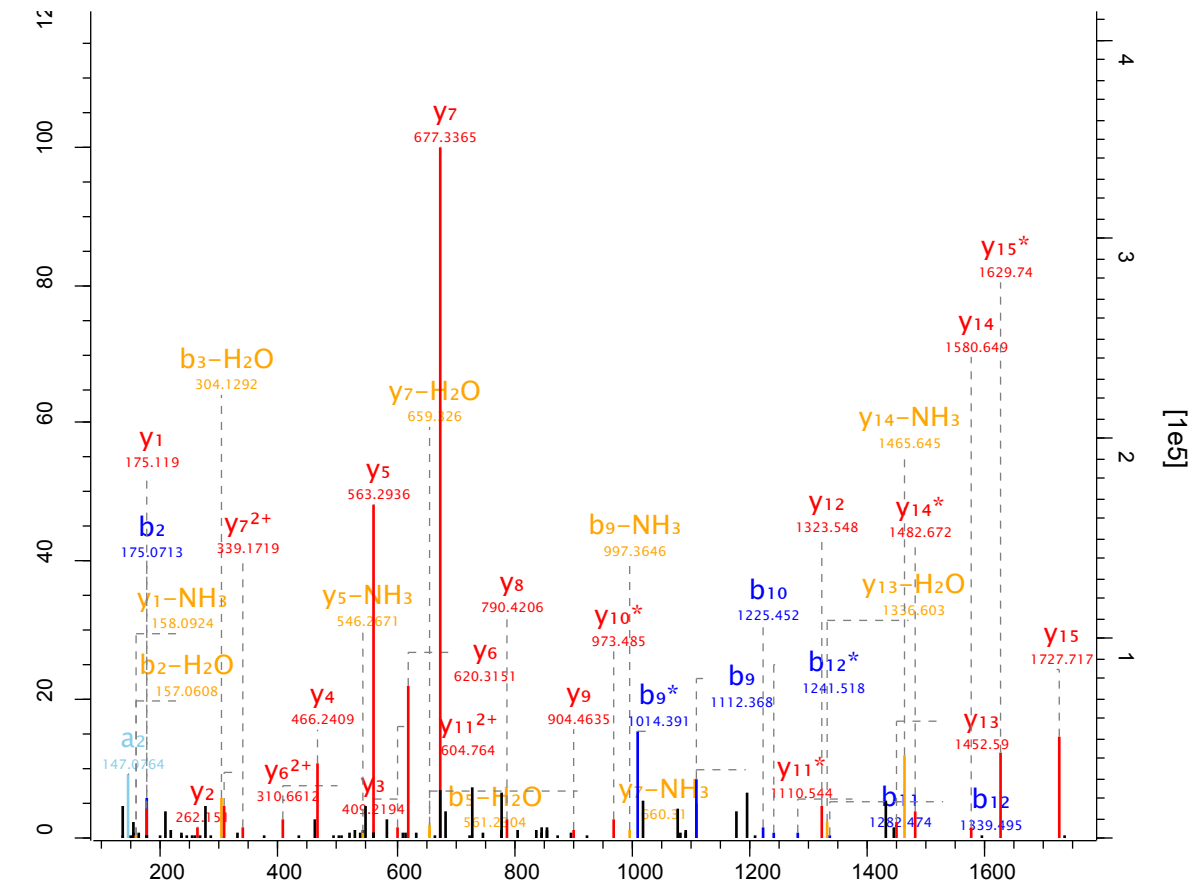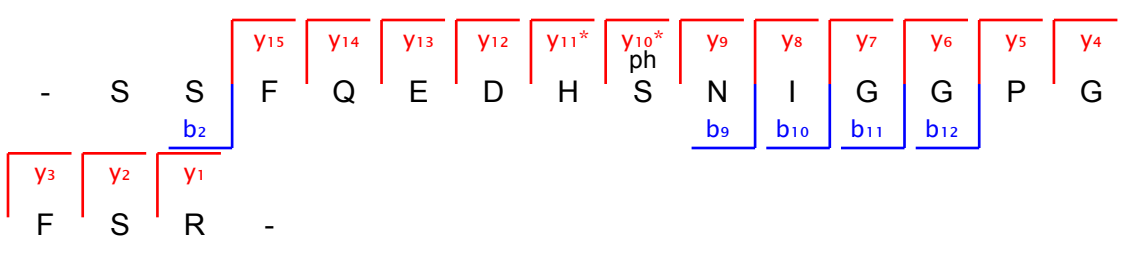

Raw file Scan Method Score m/z  
 2013\_COL15\_30\_34 12779 FTMS; HCD 50.2 680.29

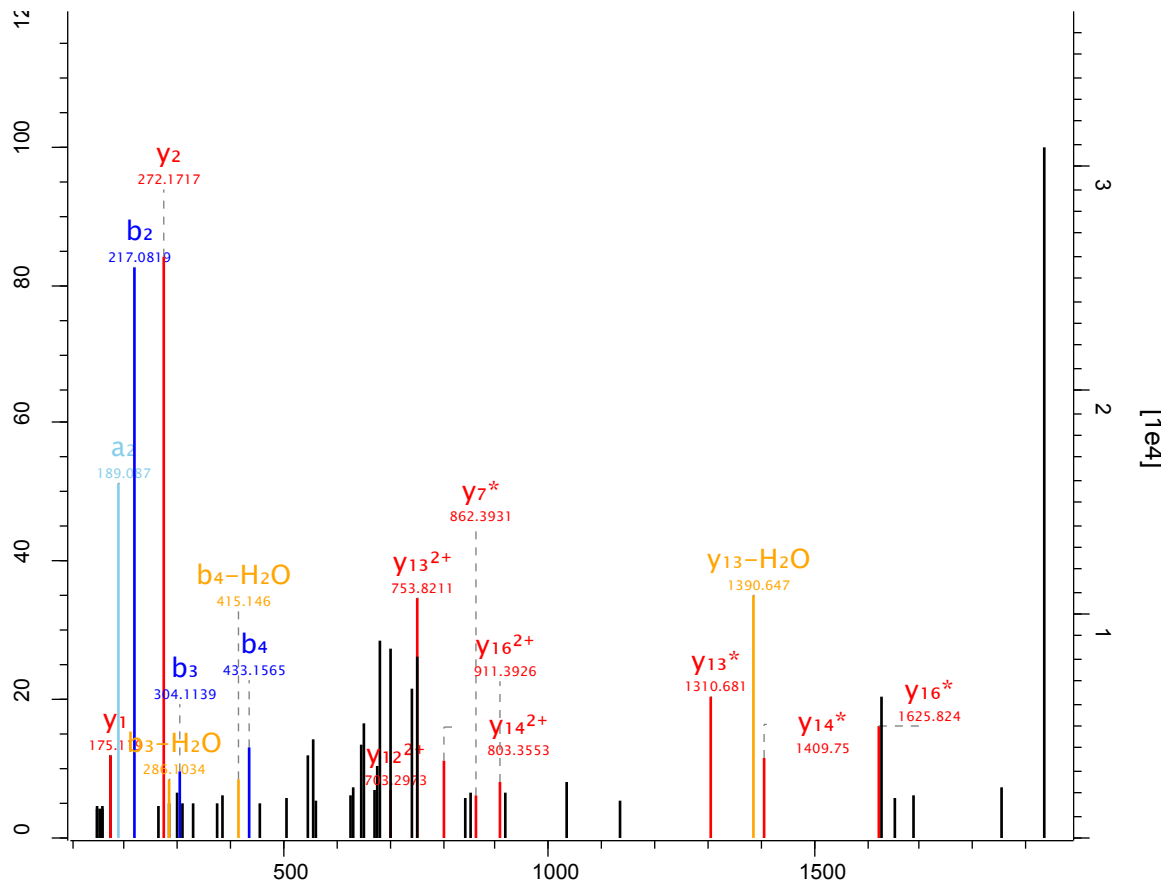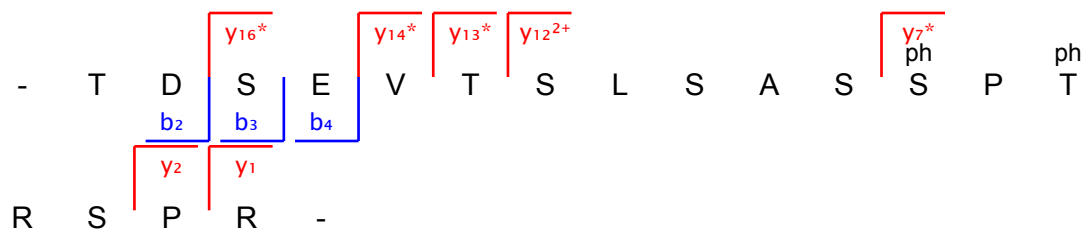

Raw file 2013\_COL15\_30\_34 Scan 12816 Method FTMS; HCD Score 48.9 m/z 779.36

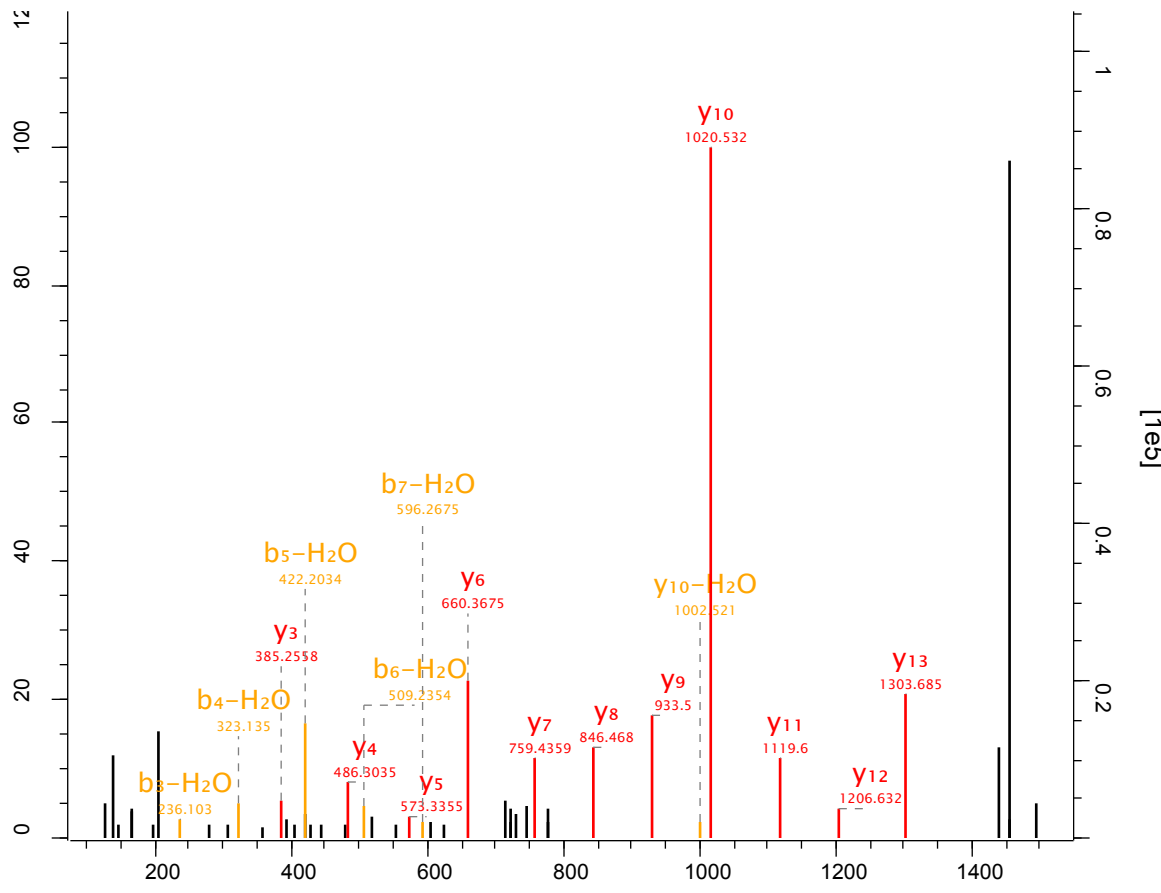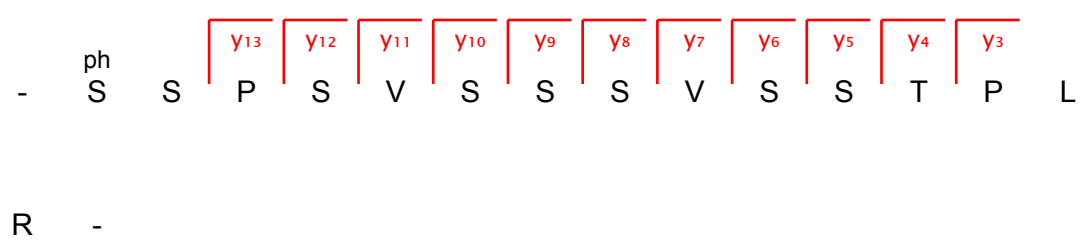

|                  |       |           |       |        |
|------------------|-------|-----------|-------|--------|
| Raw file         | Scan  | Method    | Score | m/z    |
| 2013_COL15_30_34 | 13192 | FTMS; HCD | 41.3  | 419.21 |

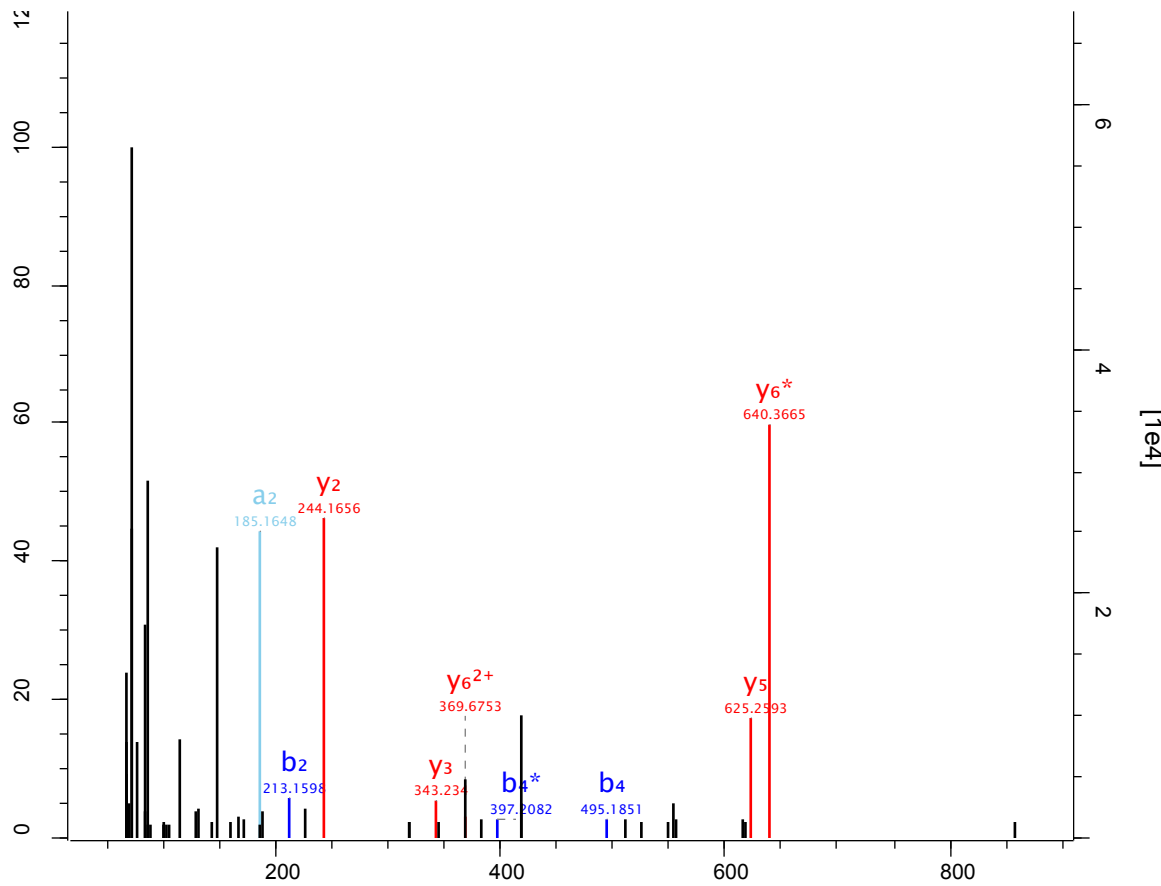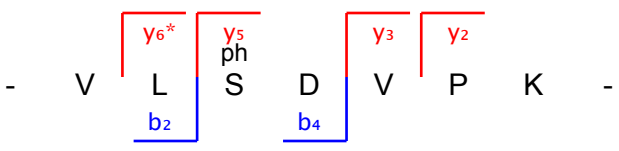

Raw file Scan Method Score m/z  
 2013\_COL15\_30\_34 1332 FTMS; HCD 105.79 594.93

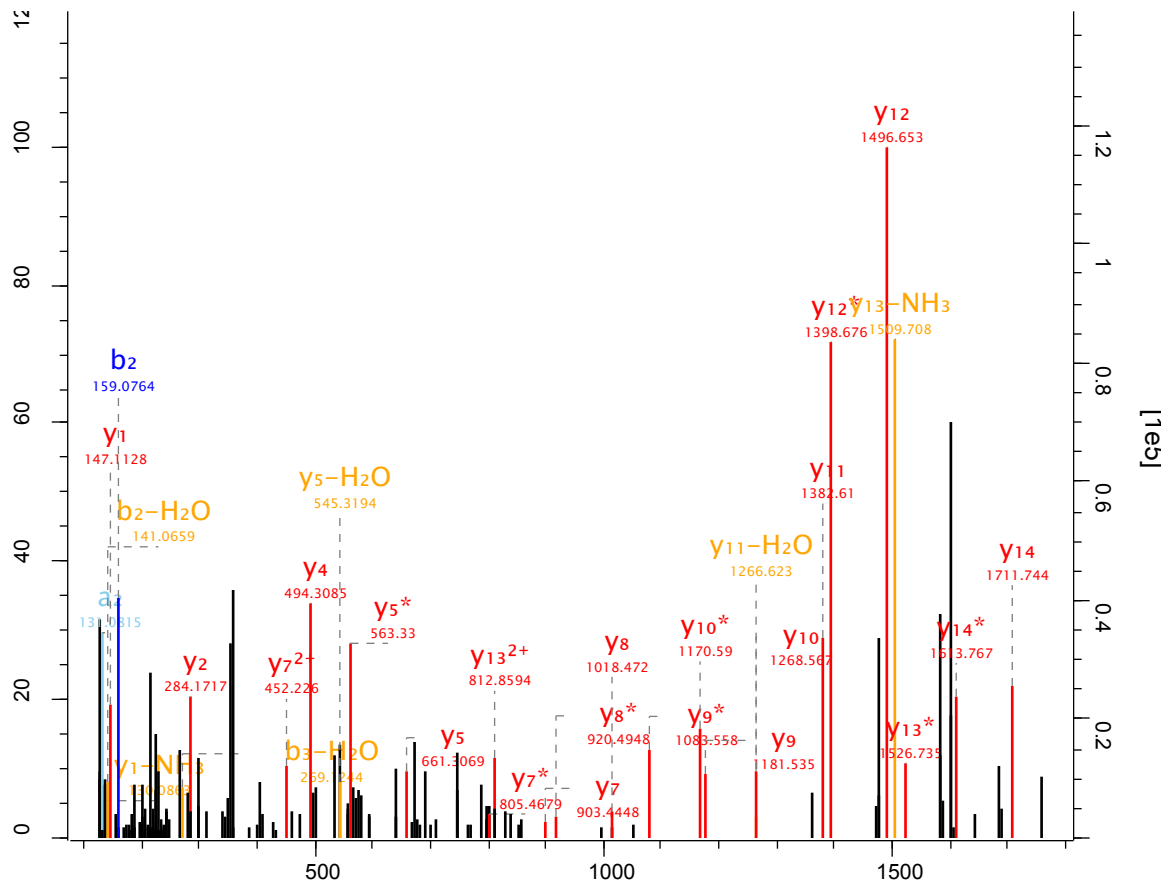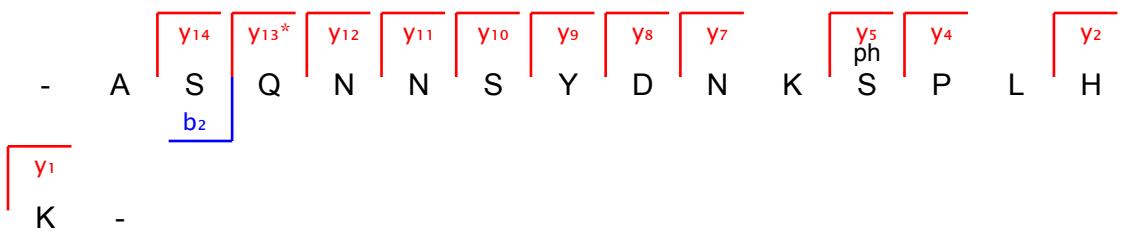



Raw file Scan Method Score m/z  
 2013\_COL15\_30\_34 13378 FTMS; HCD 131.83 504.71

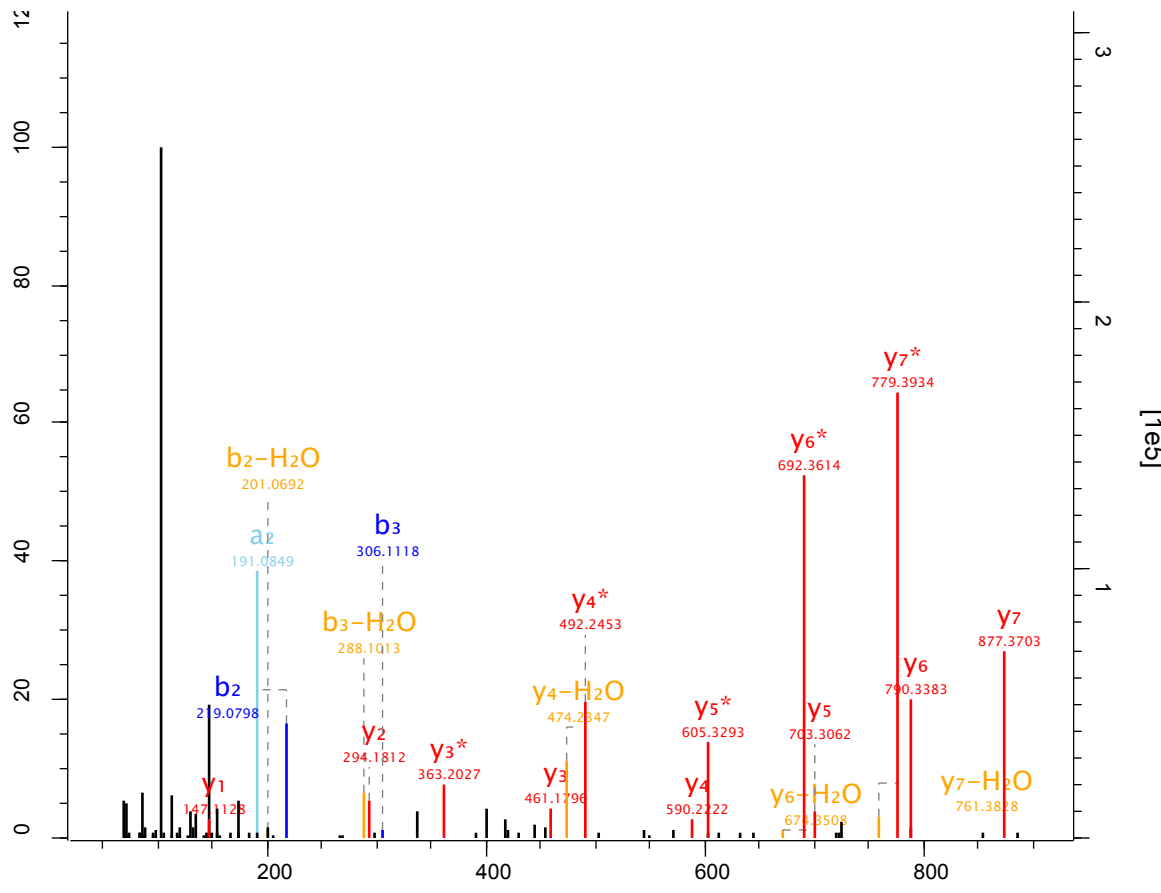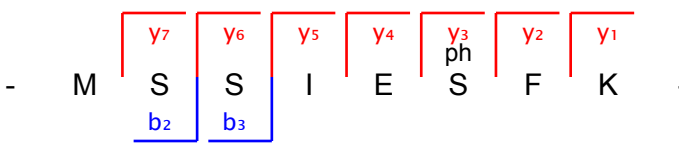

Raw file 2013\_COL15\_30\_34 Scan 13395 Method FTMS; HCD Score 121.21 m/z 721.3

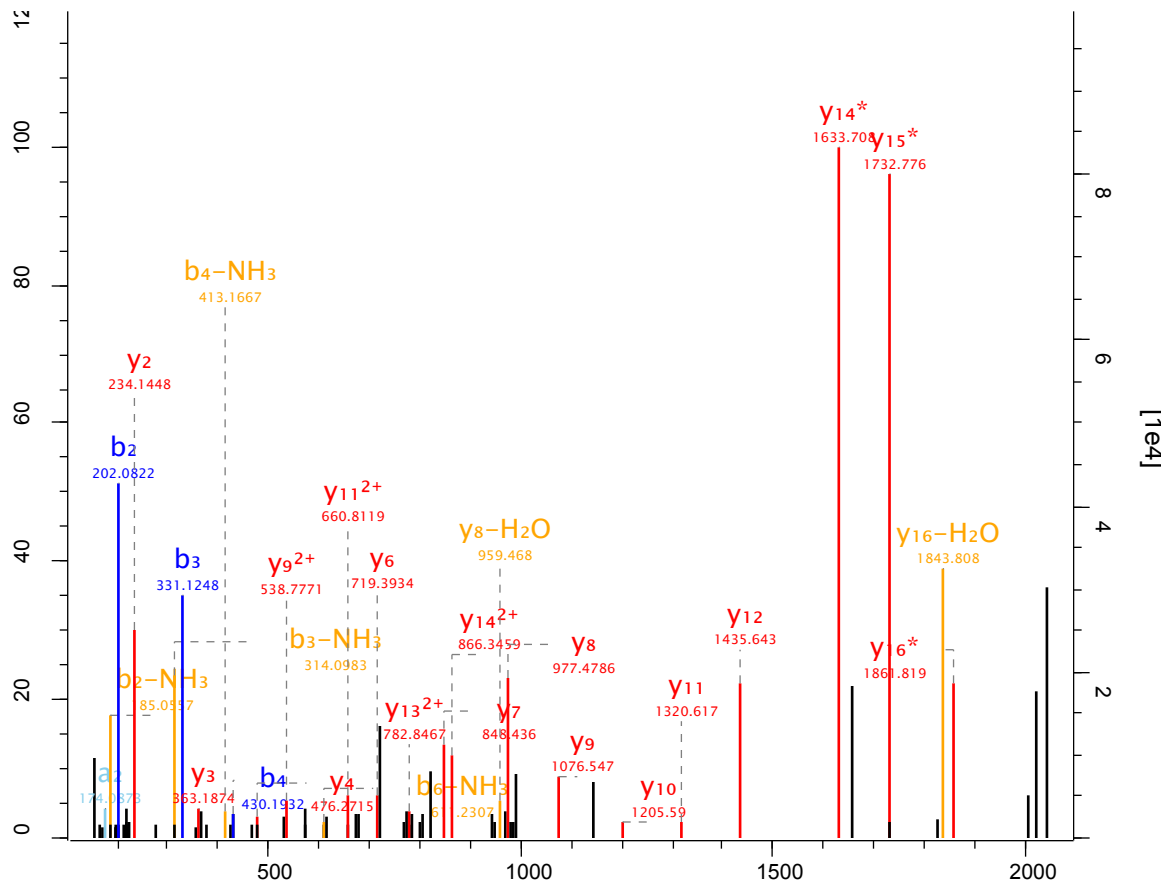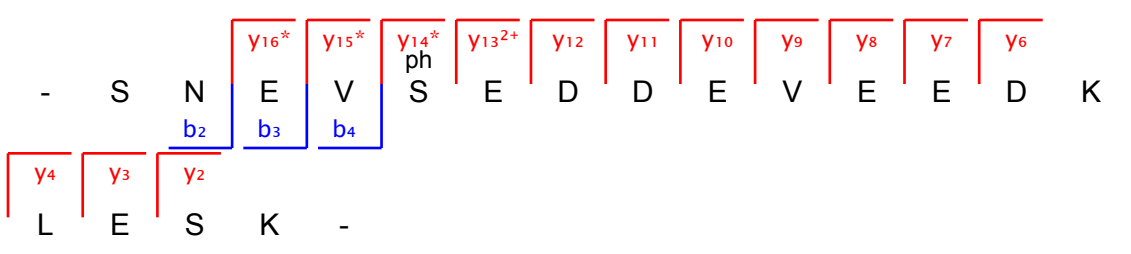

Raw file Scan Method Score m/z  
 2013\_COL15\_30\_34 13403 FTMS; HCD 128.94 755.35

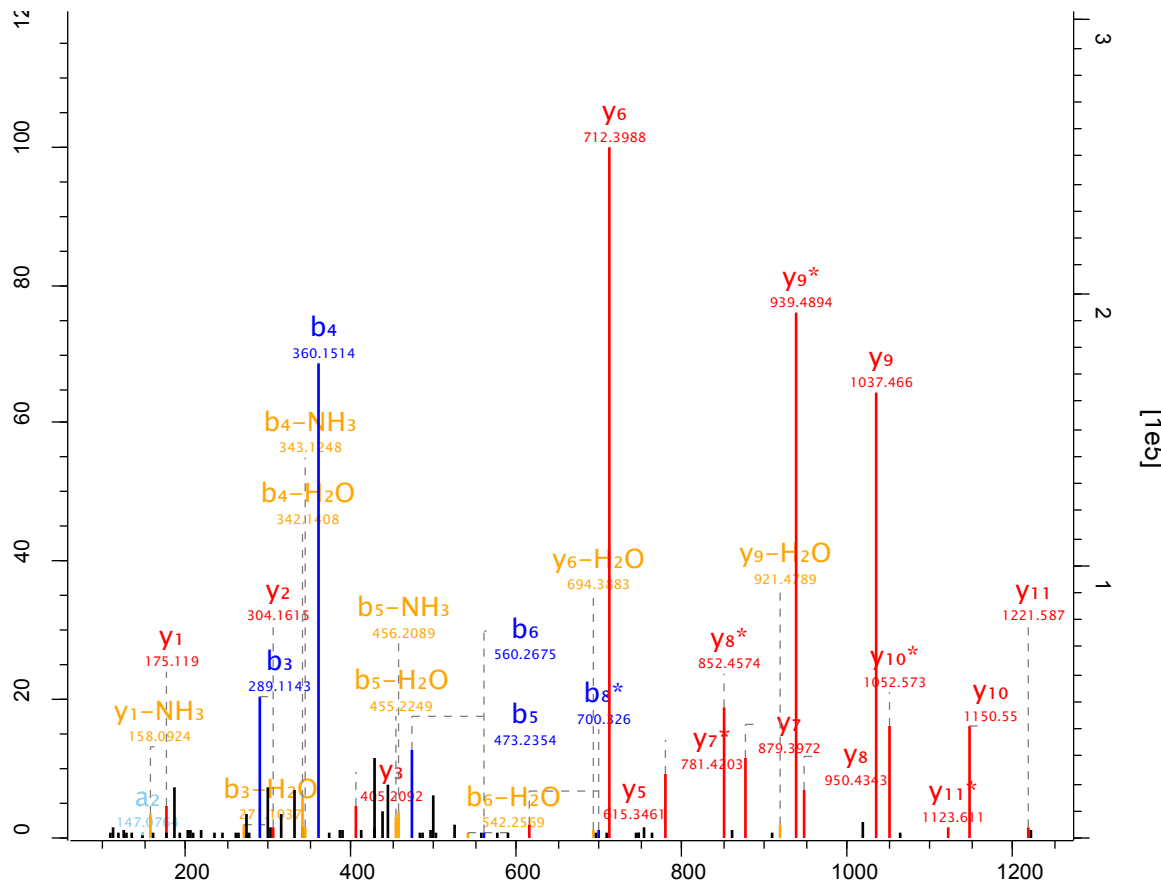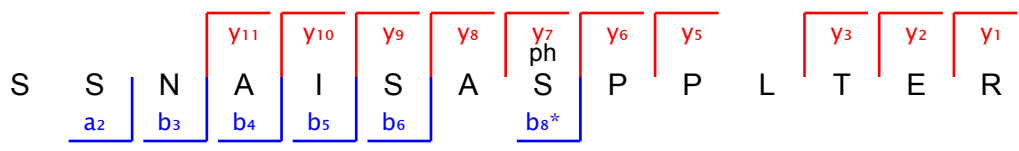

Raw file 2013\_COL15\_30\_34 Scan 13516 Method FTMS; HCD Score 94.84 m/z 800.85

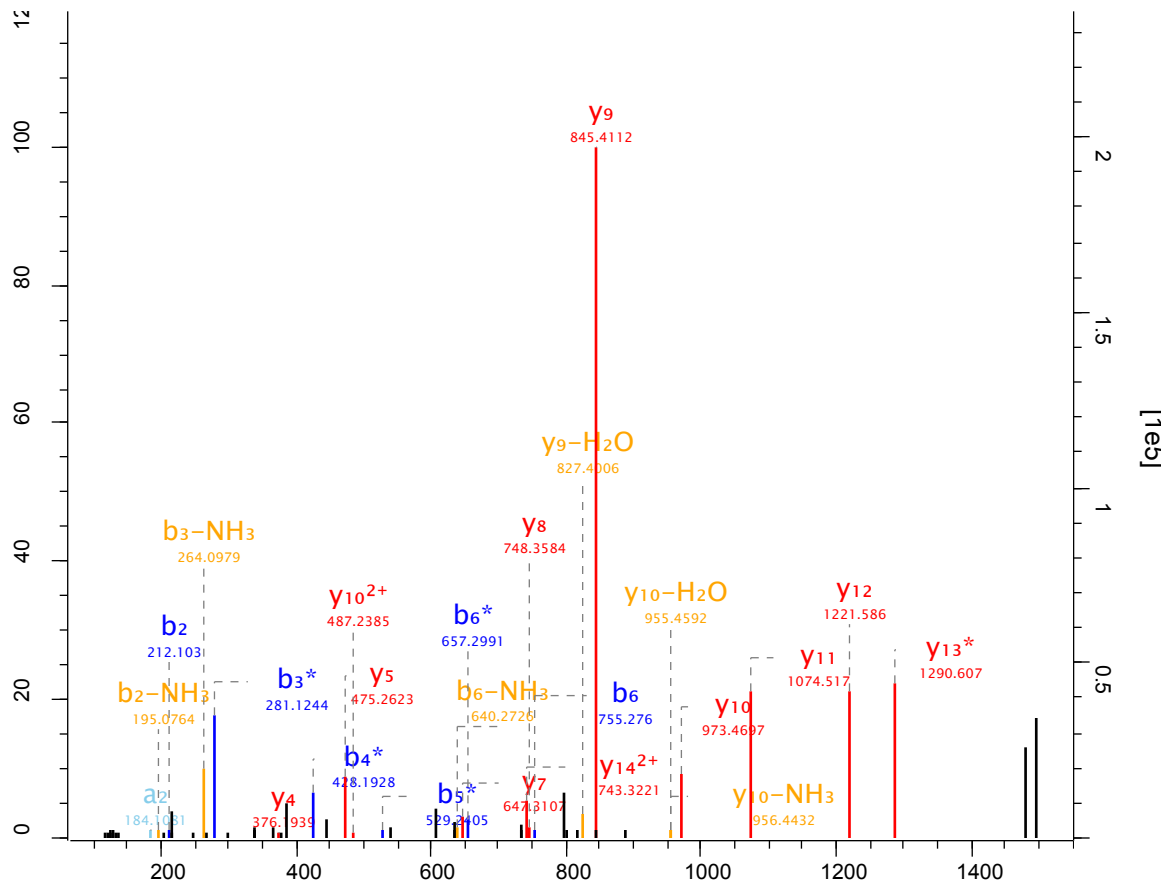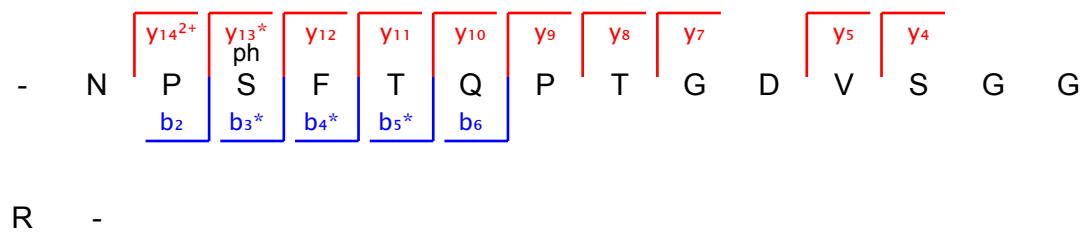

R -

Raw file Scan Method Score m/z  
 2013\_COL15\_30\_34 13528 FTMS; HCD 56.17 823.33

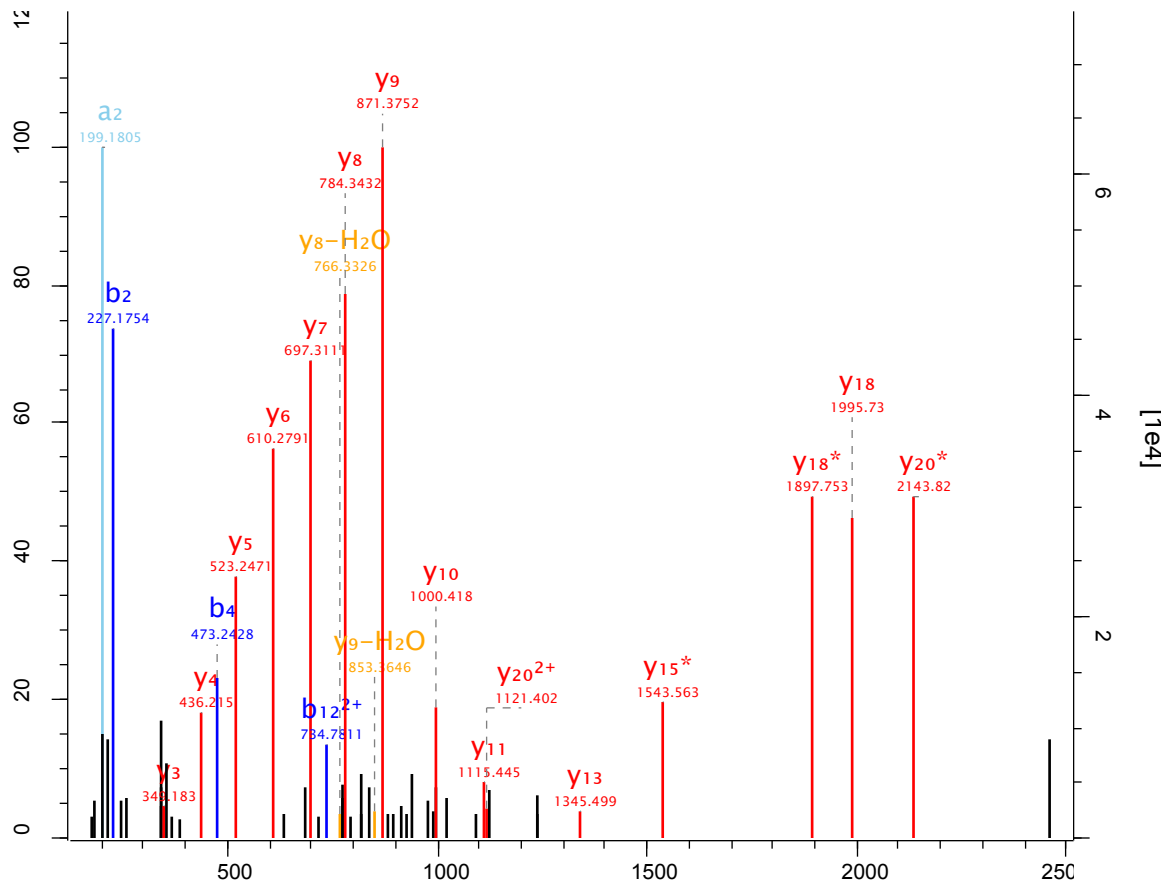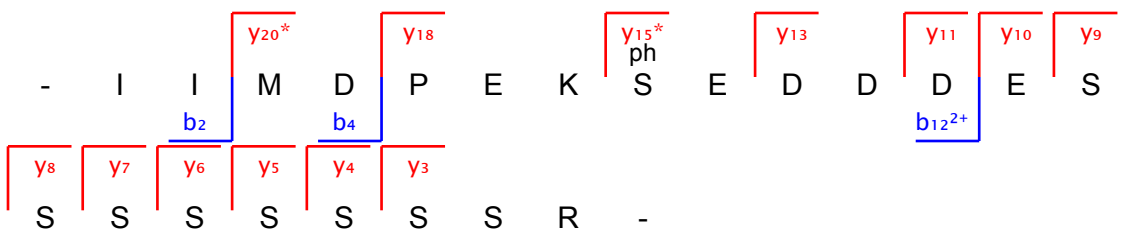

Raw file Scan Method Score m/z  
 2013\_COL15\_30\_34 1364 FTMS; HCD 54.9 459.2

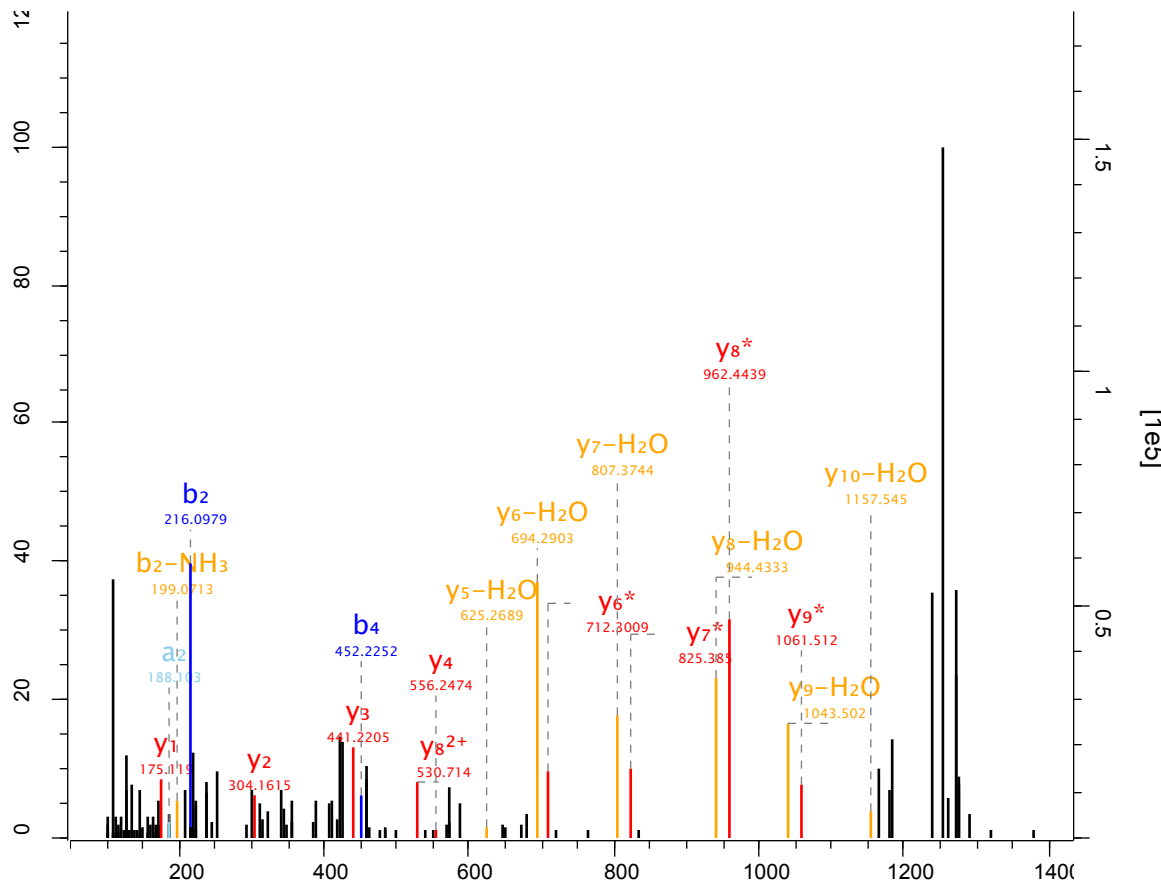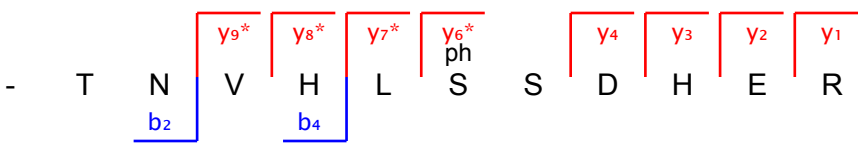

Raw file Scan Method Score m/z  
 2013\_COL15\_30\_34 13970 FTMS; HCD 142.54 718.79

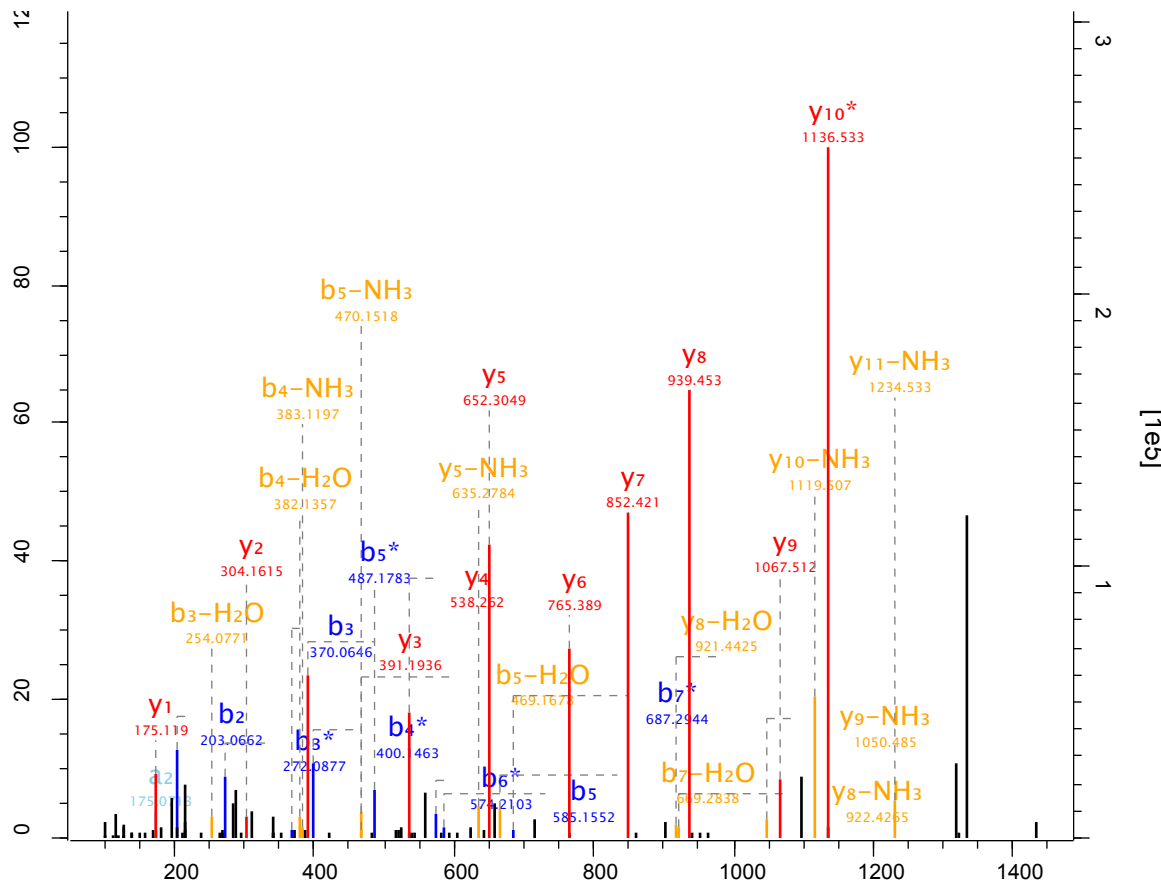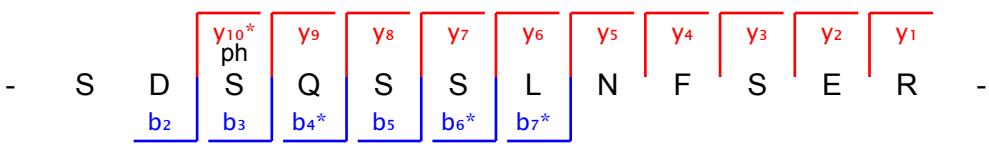

Raw file Scan Method Score m/z  
 2013\_COL15\_30\_34 14052 FTMS; HCD 262.55 664.96

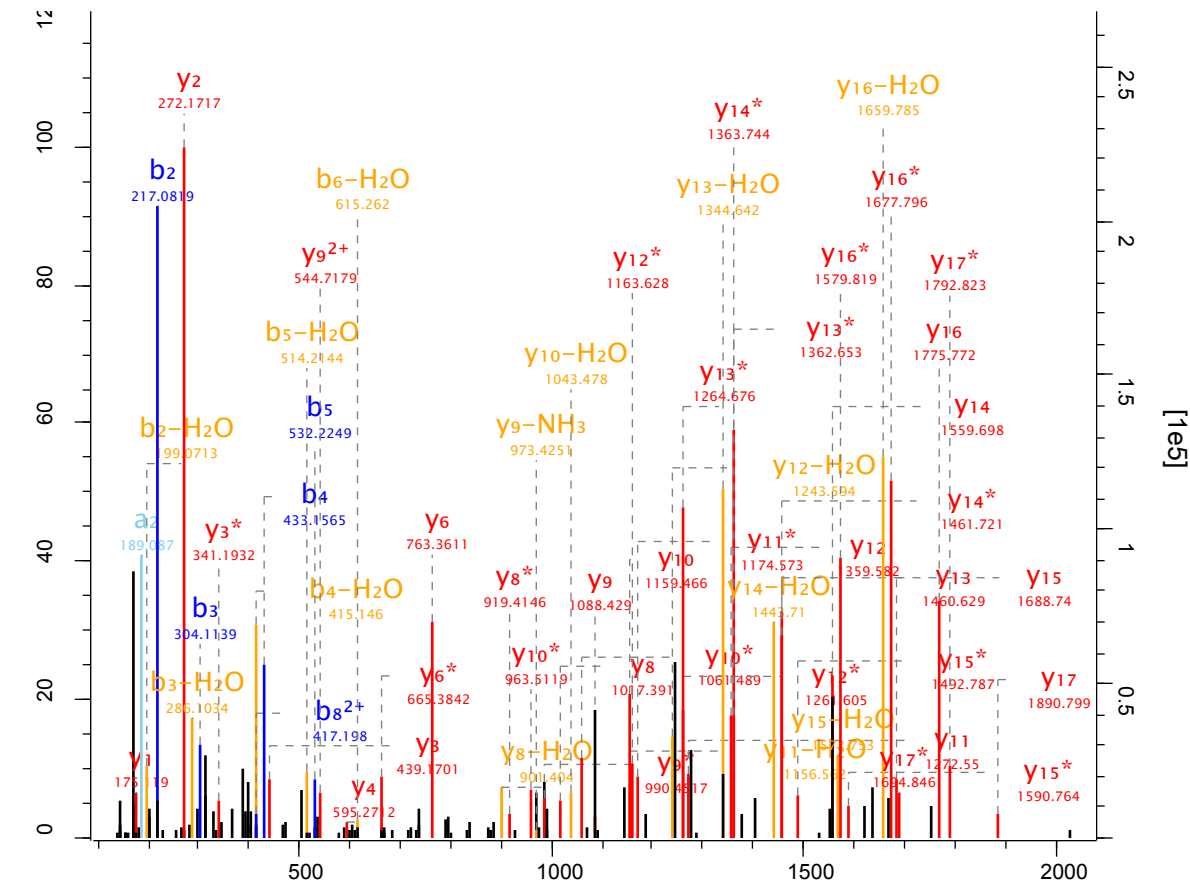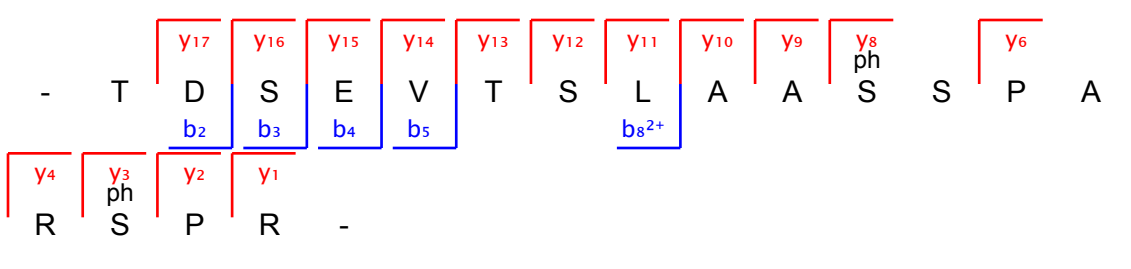



Raw file: 2013\_COL15\_30\_34  
 Scan: 14083  
 Method: FTMS; HCD  
 Score: 122.49  
 m/z: 613.59

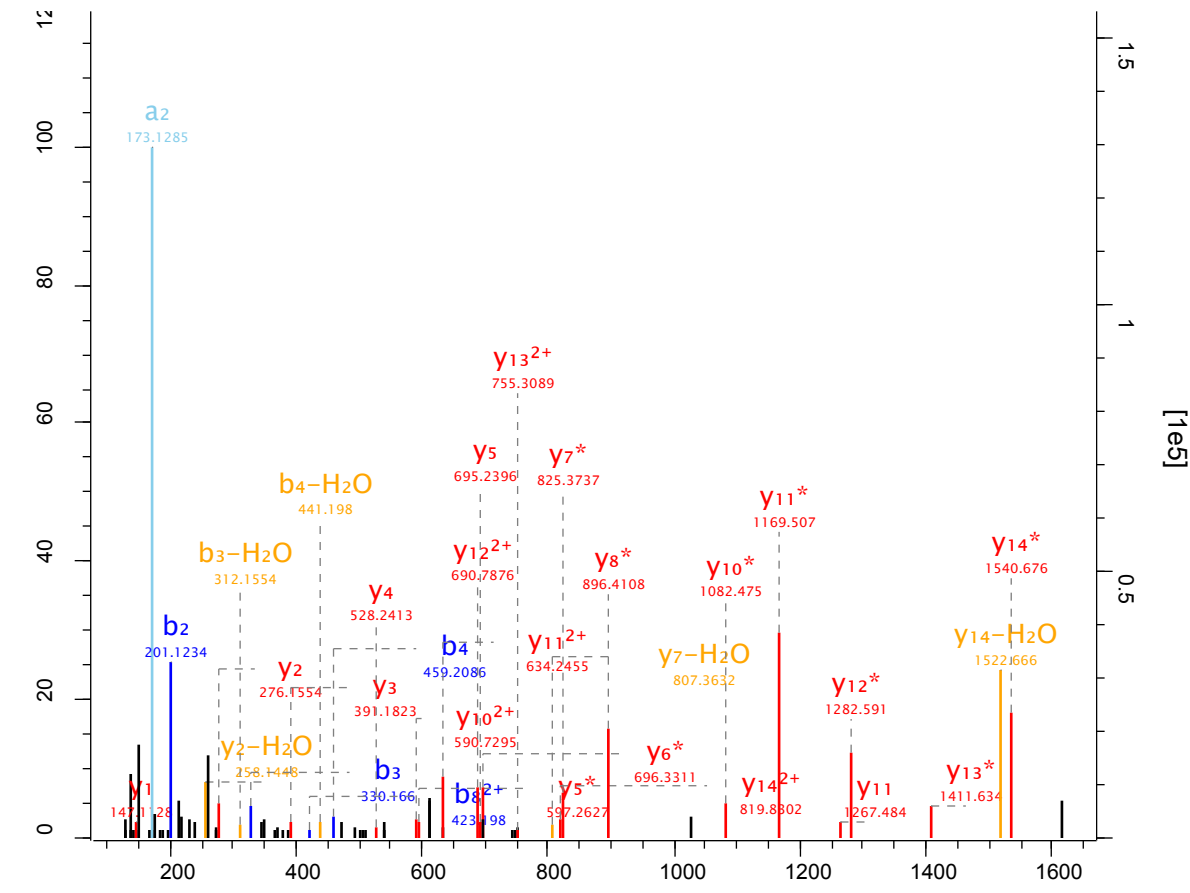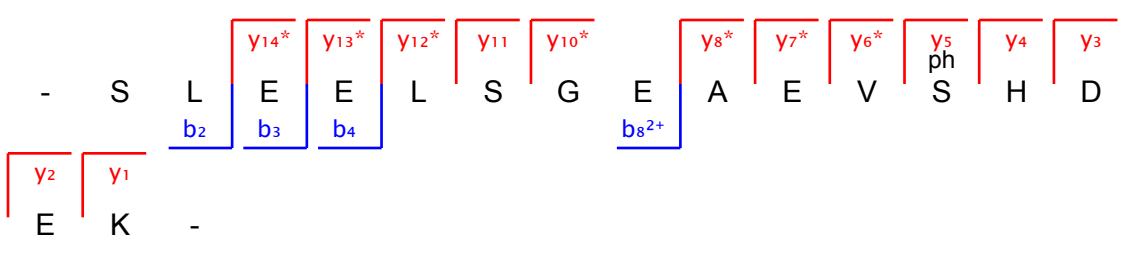

| Raw file         | Scan  | Method    | Score | m/z    |
|------------------|-------|-----------|-------|--------|
| 2013_COL15_30_34 | 14281 | FTMS; HCD | 49.45 | 553.24 |

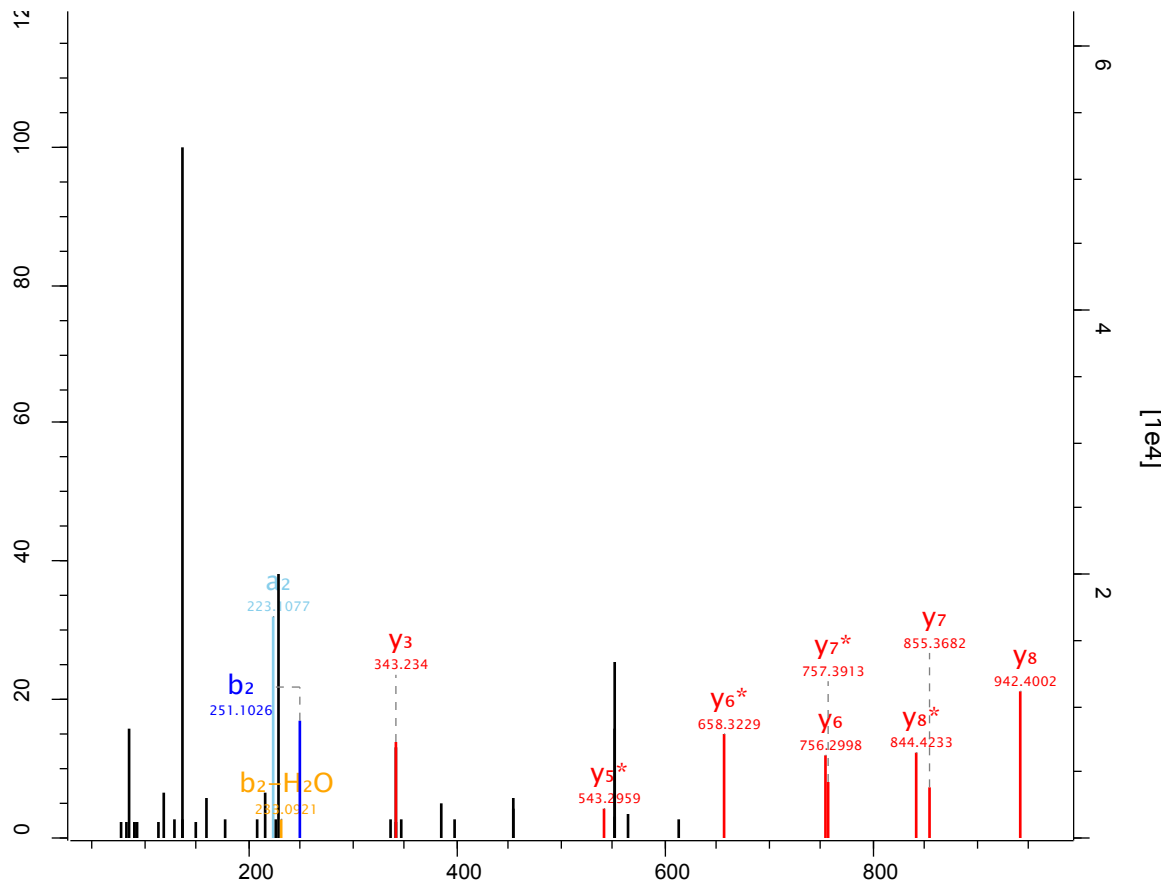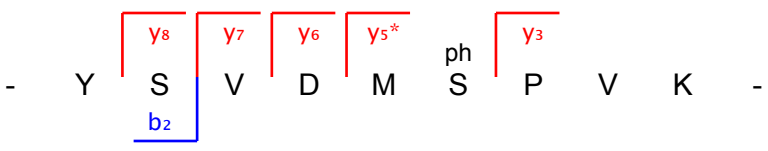

Raw file 2013\_COL15\_30\_34 Scan 14307 Method FTMS; HCD Score 101.08 m/z 732.34

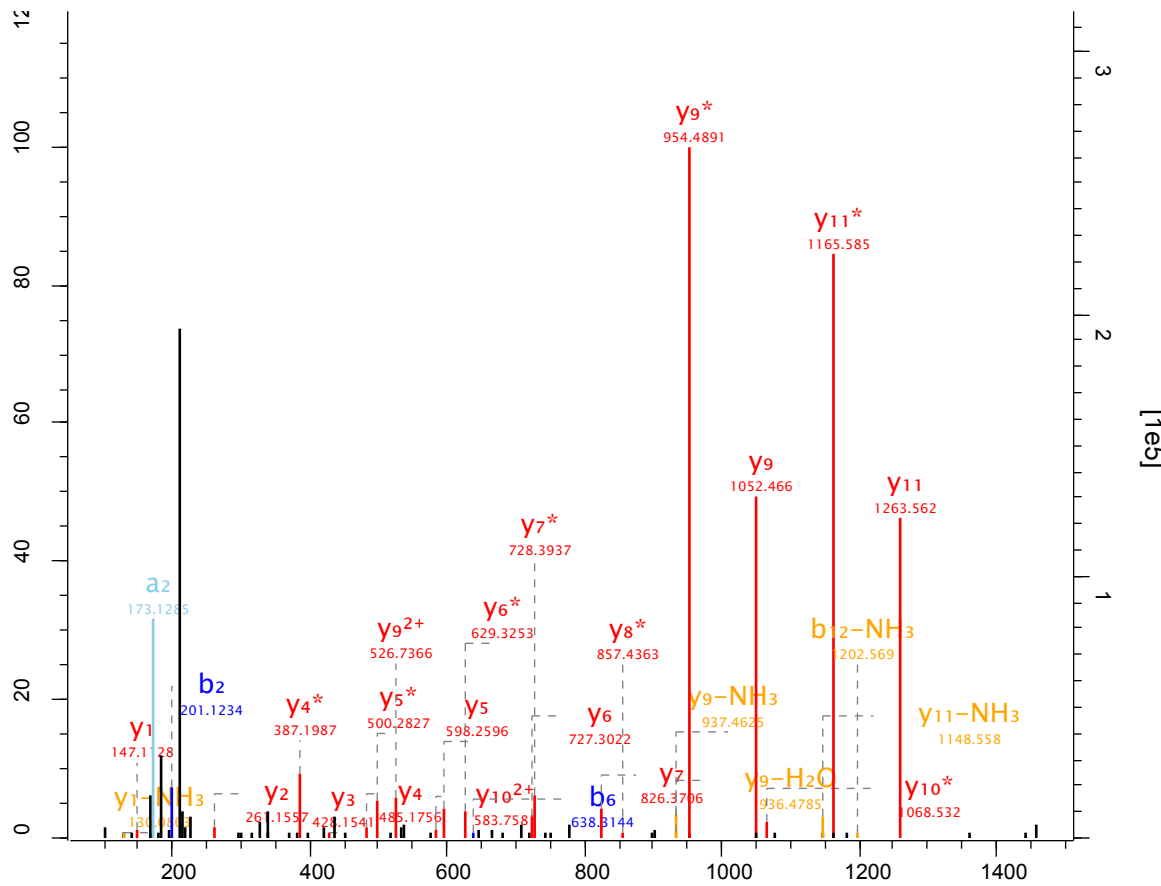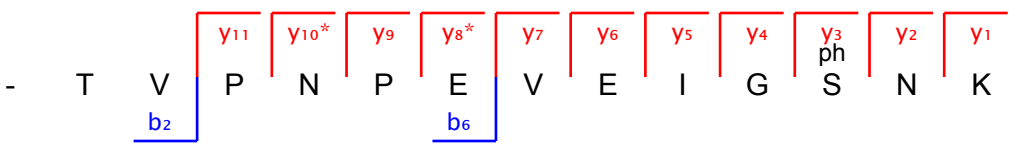

Raw file 2013\_COL15\_30\_34 Scan 14363 Method FTMS; HCD Score 63.98 m/z 719.35

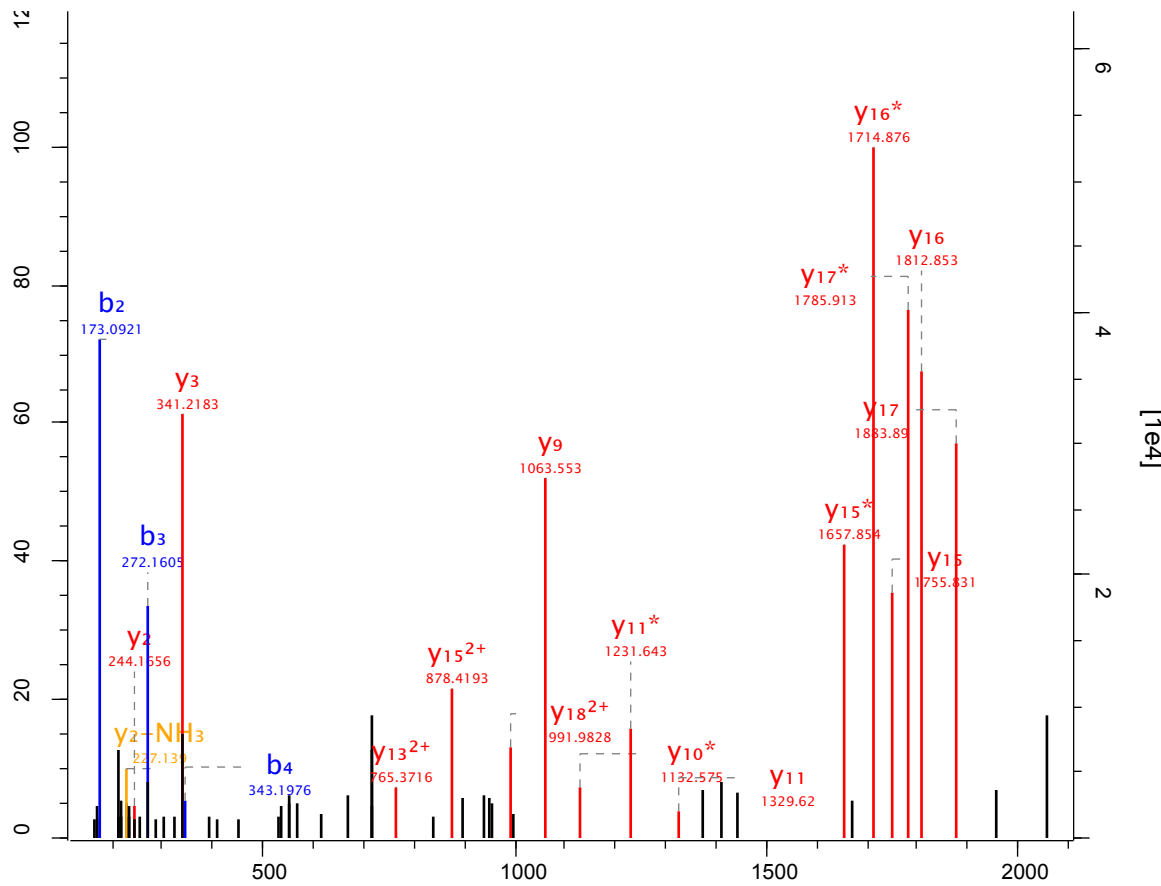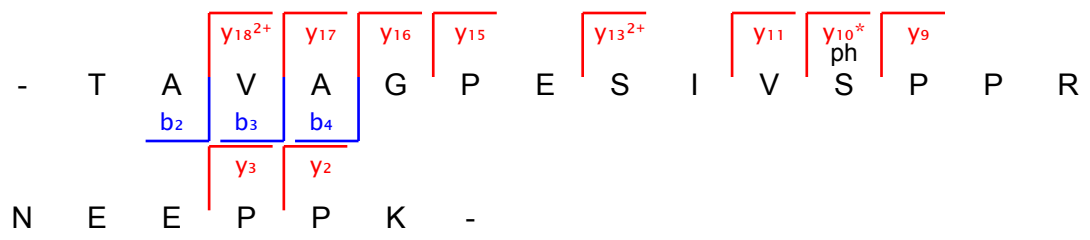

Raw file Scan Method Score m/z  
 2013\_COL15\_30\_34 14401 FTMS; HCD 45.89 678.3

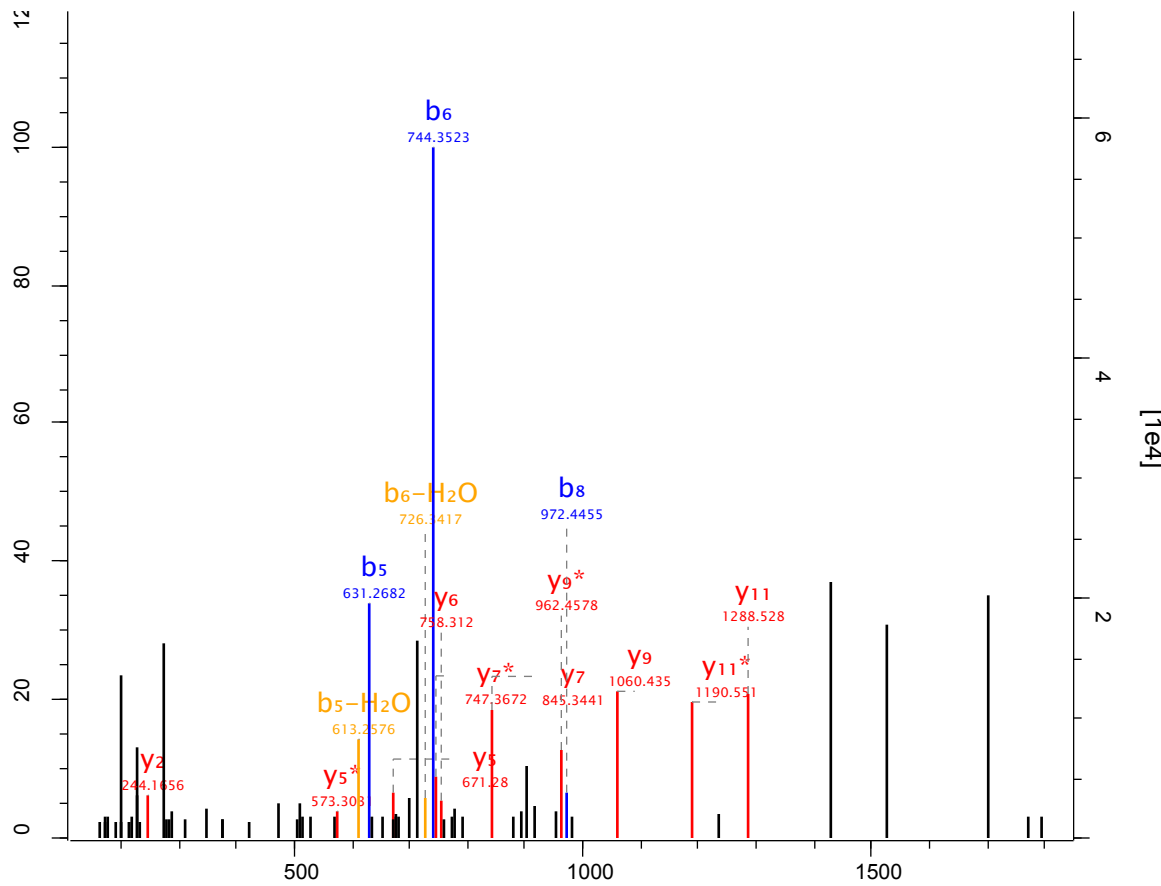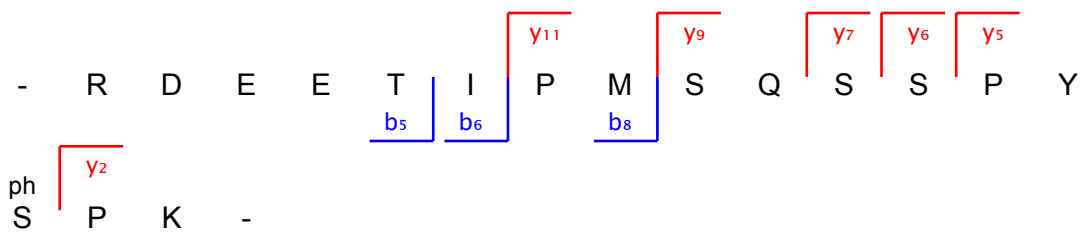

Raw file Scan Method Score m/z  
 2013\_COL15\_30\_34 14501 FTMS; HCD 172.5 835.3

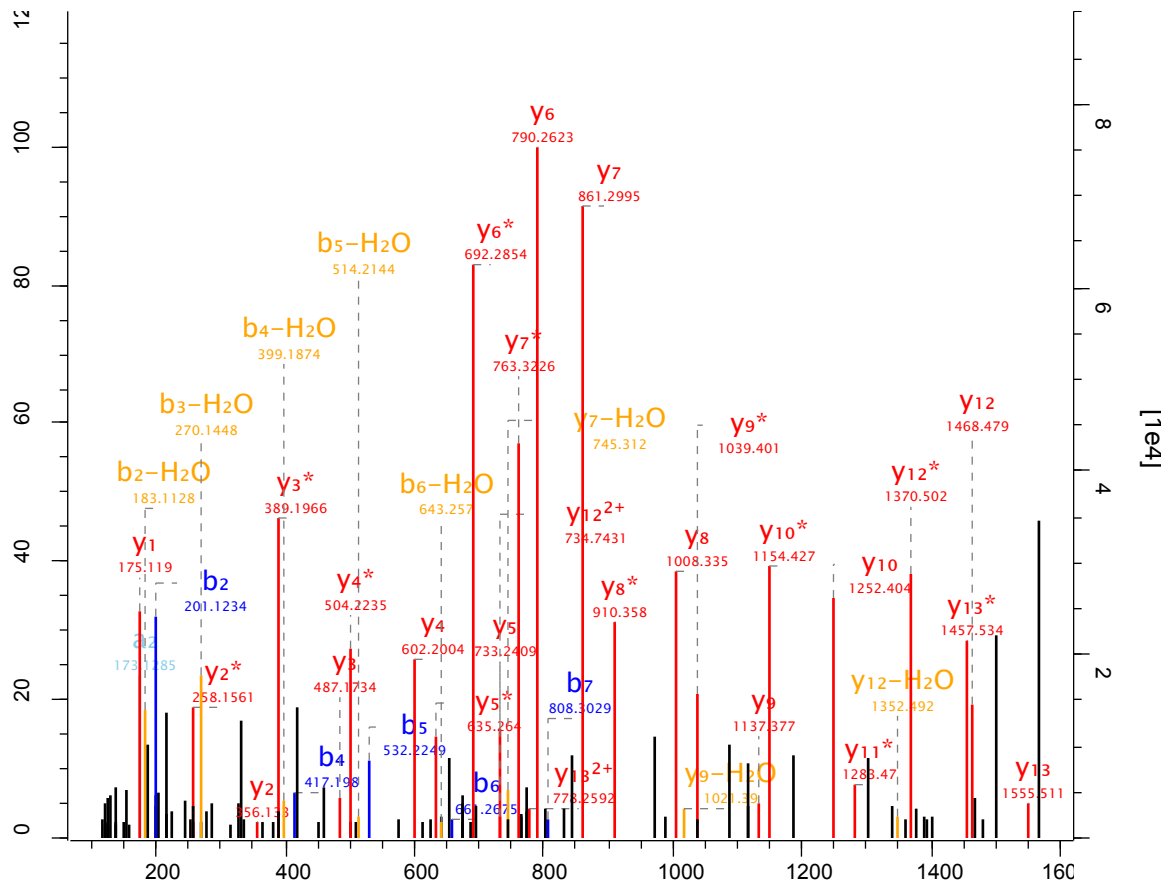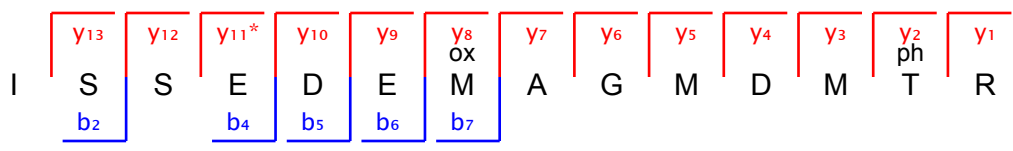

Raw file Scan Method Score m/z  
 2013\_COL15\_30\_34 14782 FTMS; HCD 96 717.98

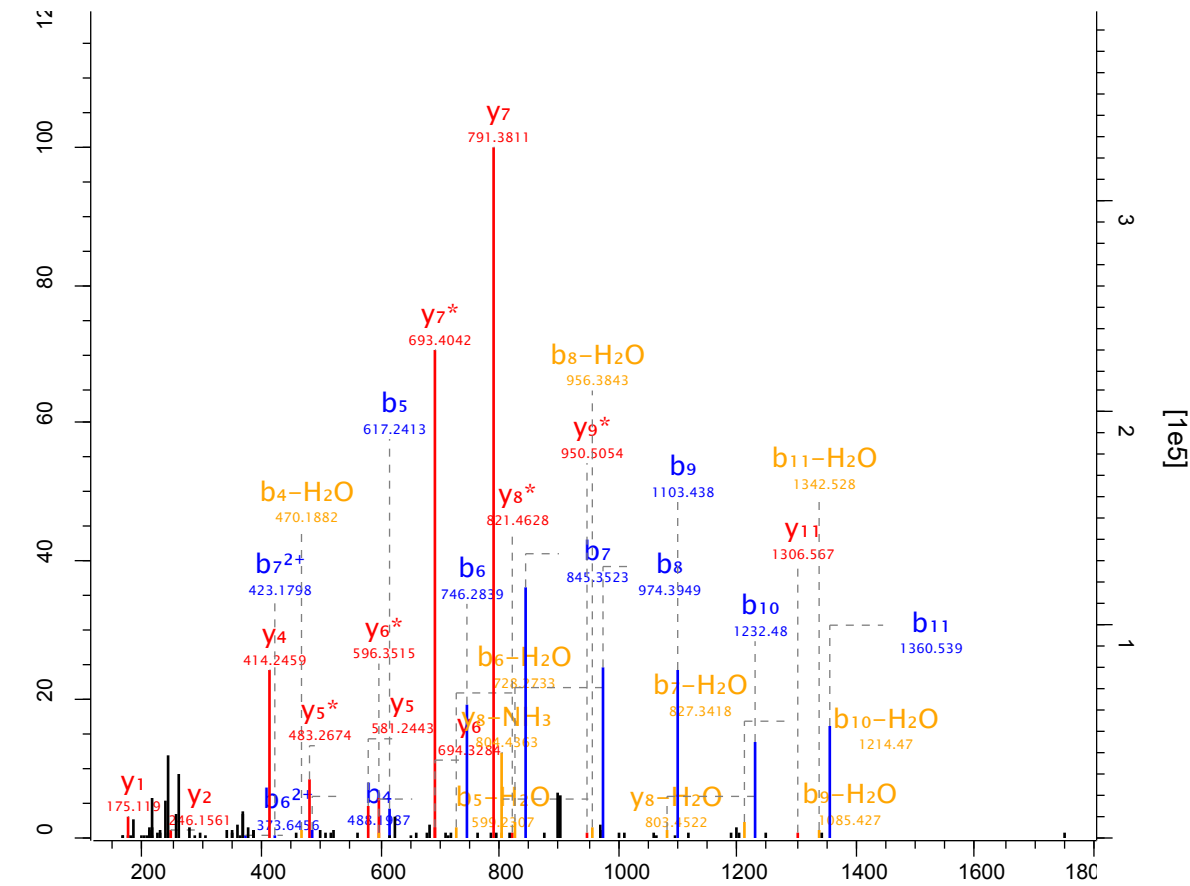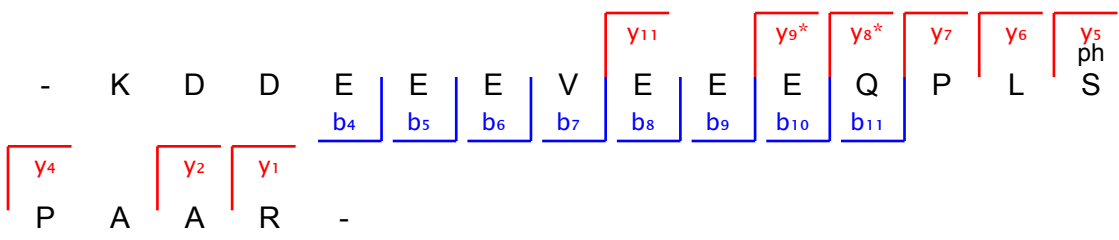

Raw file Scan Method Score m/z  
 2013\_COL15\_30\_34 14806 FTMS; HCD 55.45 677.6

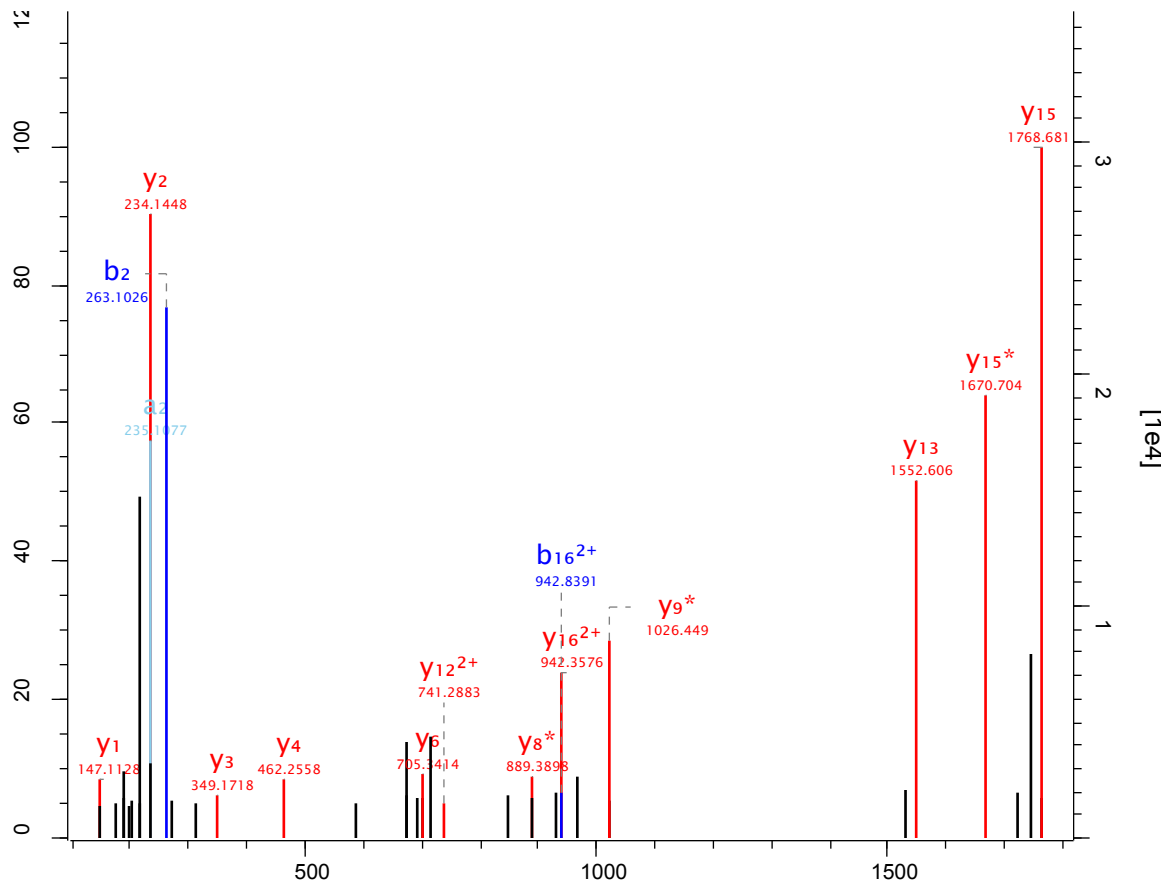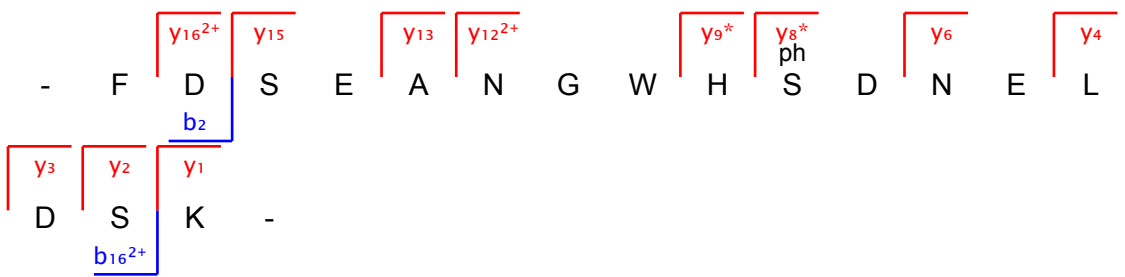



Raw file Scan Method Score m/z  
 2013\_COL15\_30\_34 15076 FTMS; HCD 64.8 633.29

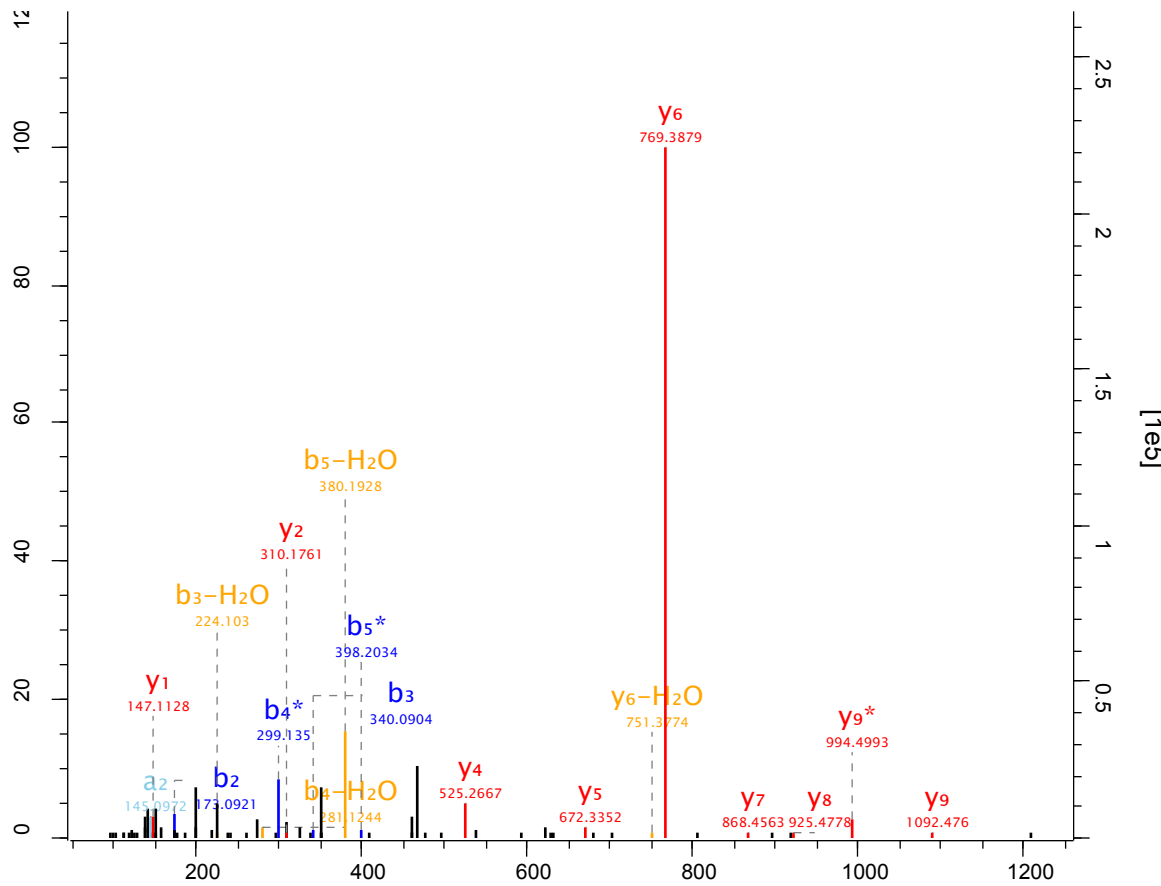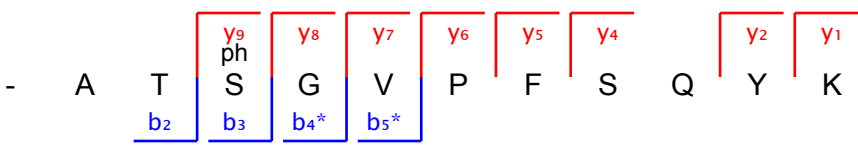

Raw file Scan Method Score m/z  
 2013\_COL15\_30\_34 15224 FTMS; HCD 110.77 576.58

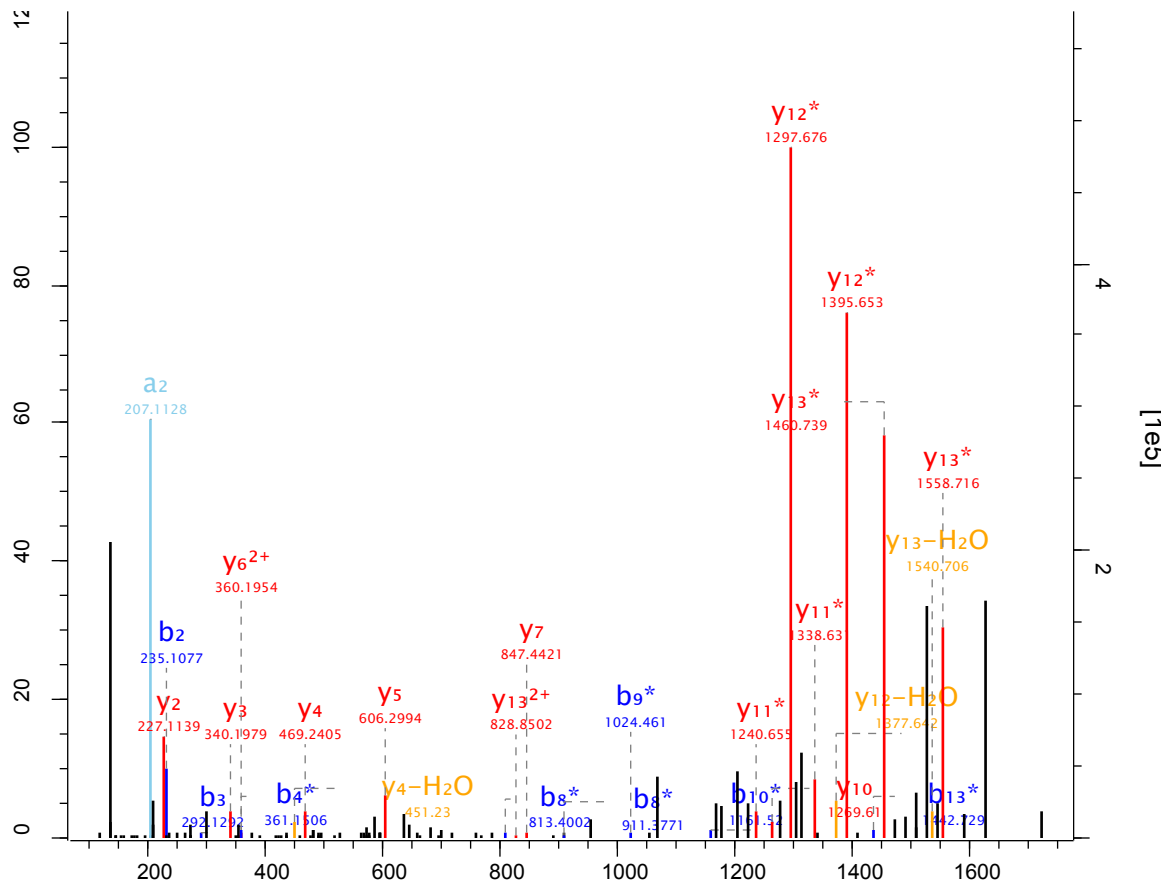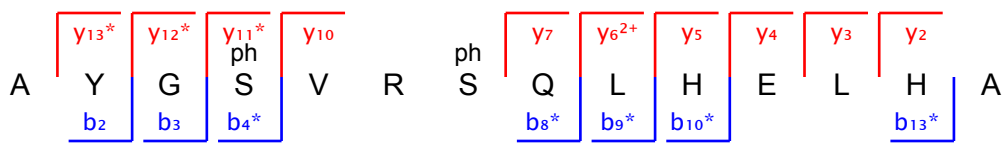

Raw file Scan Method Score m/z  
 2013\_COL15\_30\_34 15444 FTMS; HCD 51.73 634.71

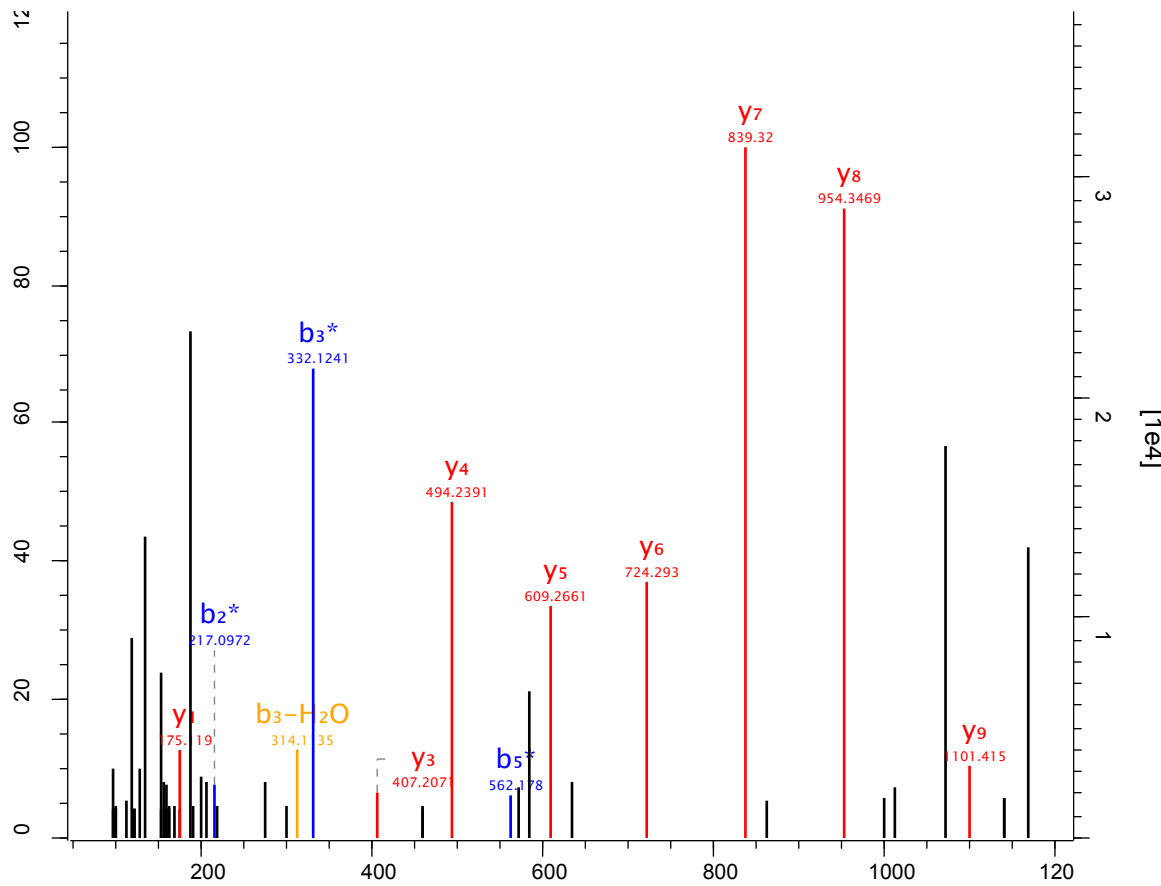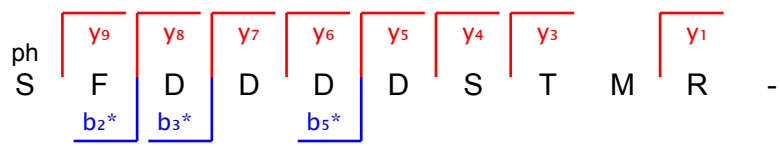

Raw file Scan Method Score m/z  
 2013\_COL15\_30\_34 15466 FTMS; HCD 62.47 550.77

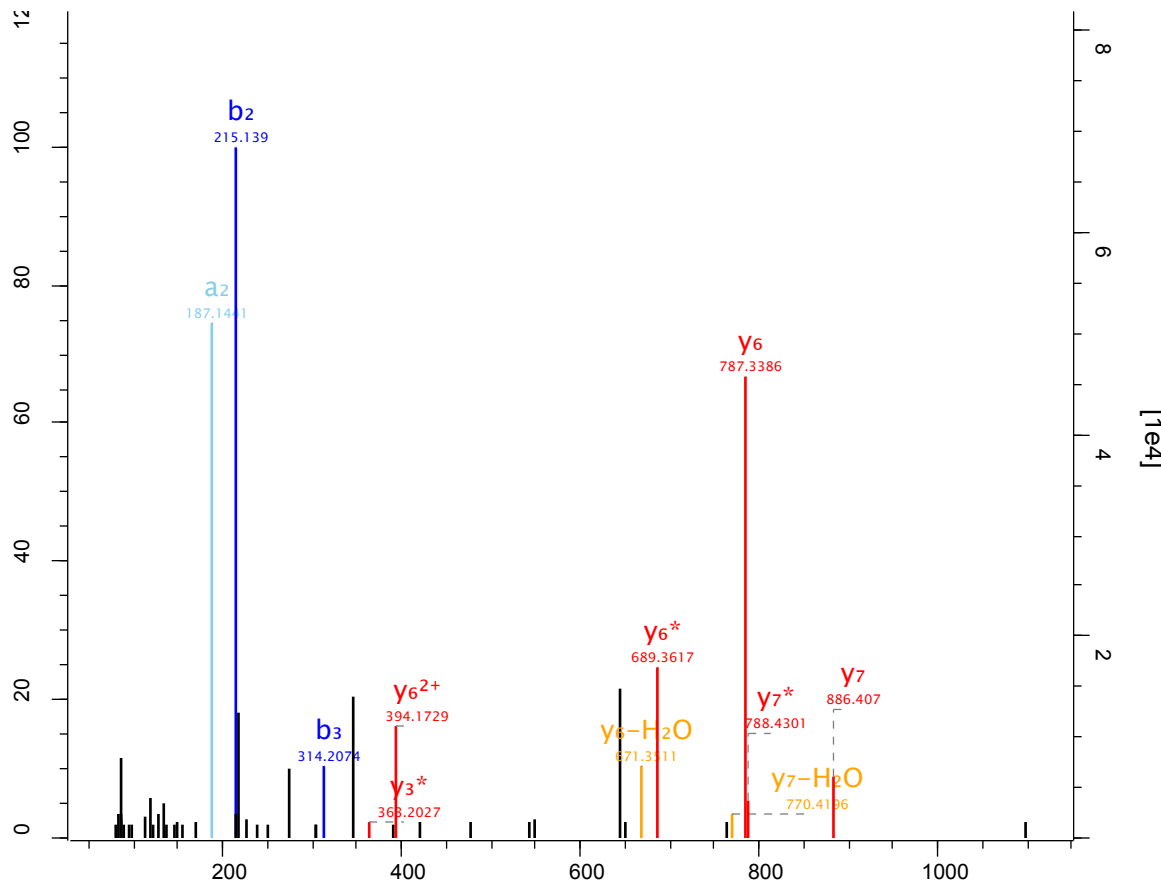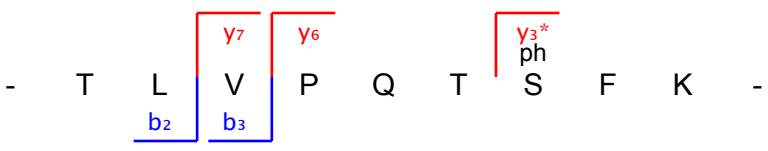

Raw file: 2013\_COL15\_30\_34  
 Scan: 15702  
 Method: FTMS; HCD  
 Score: 141.53  
 m/z: 672.58

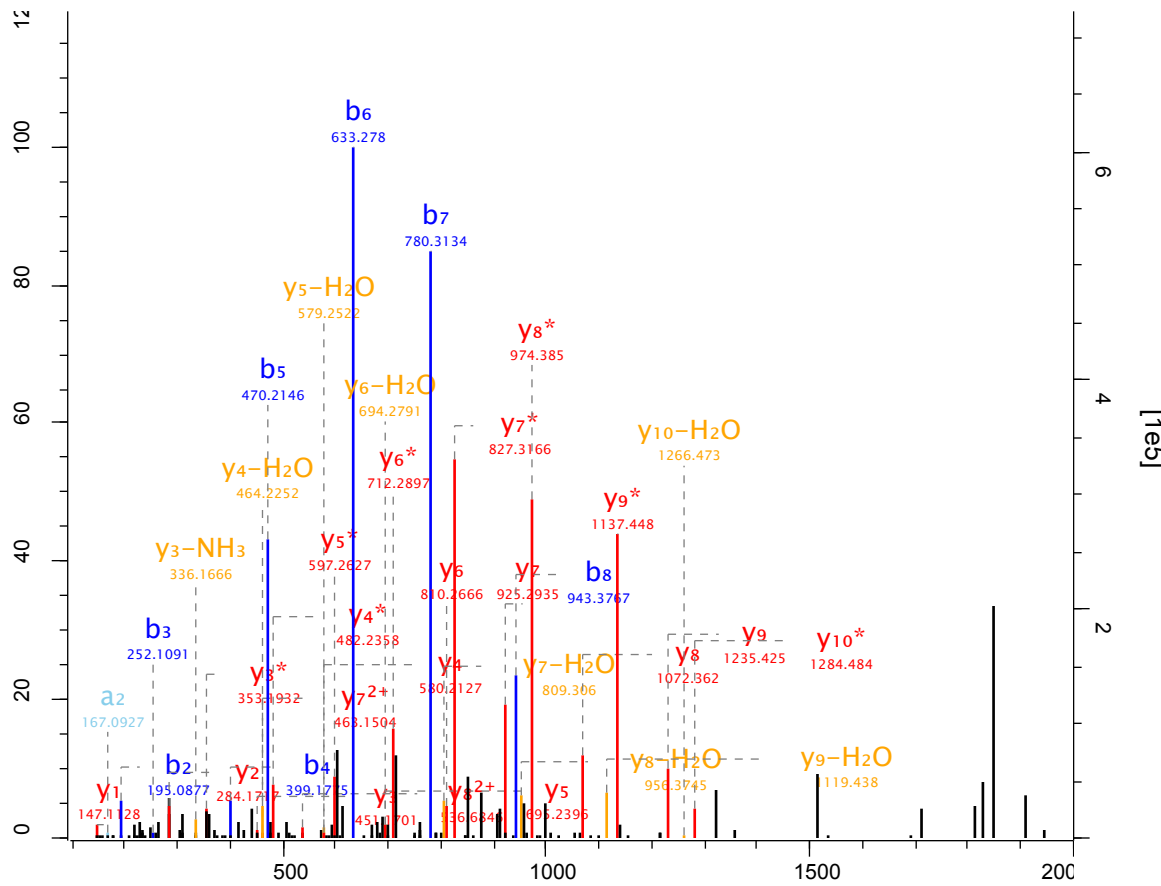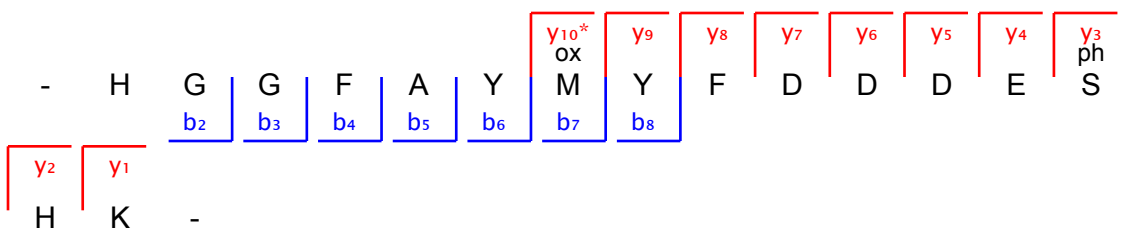

Raw file Scan Method Score m/z  
 2013\_COL15\_30\_34 15748 FTMS; HCD 113.36 917.46

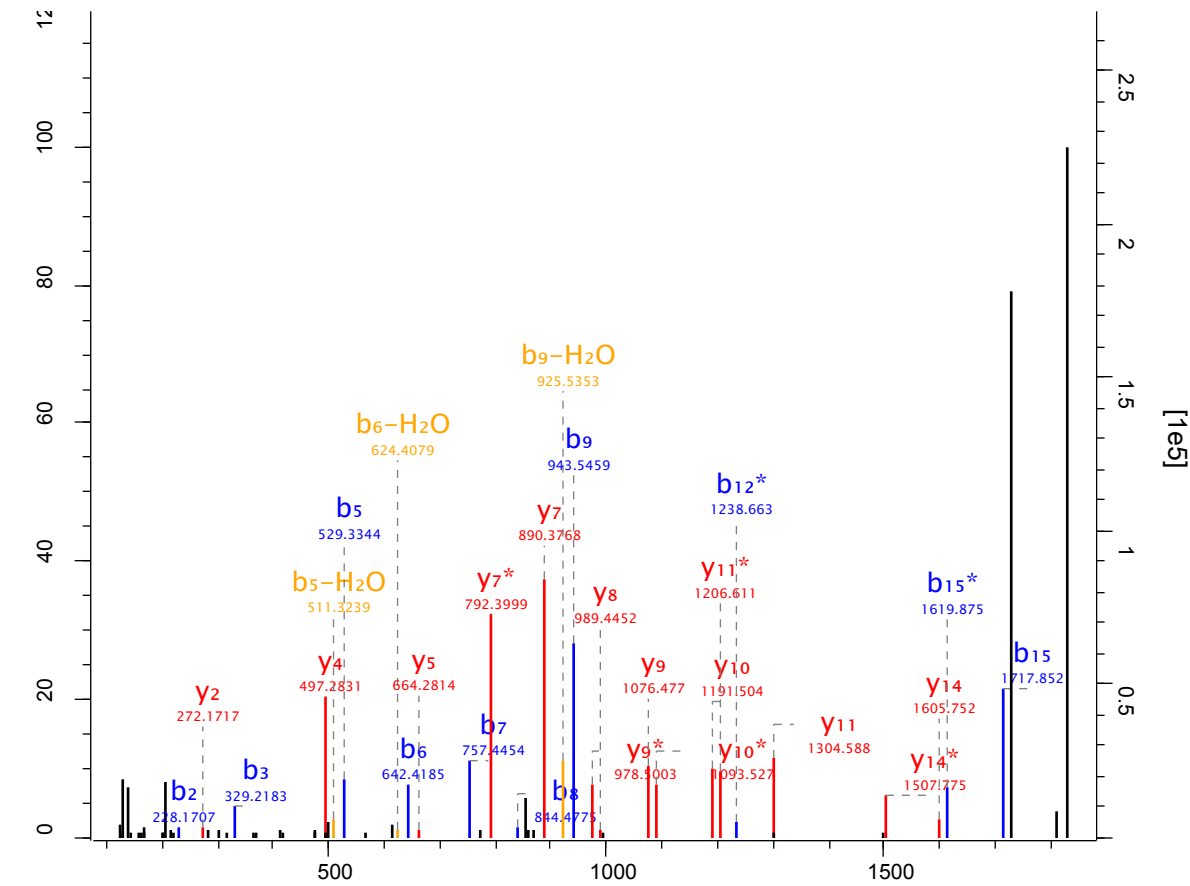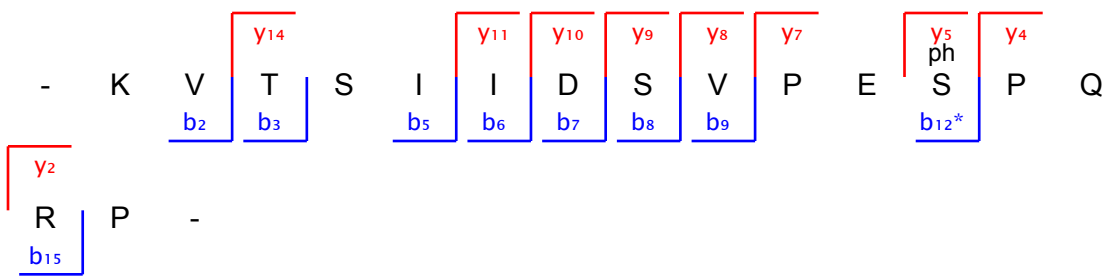

| Raw file         | Scan  | Method    | Score | m/z    |
|------------------|-------|-----------|-------|--------|
| 2013_COL15_30_34 | 15762 | FTMS; HCD | 40.86 | 980.43 |

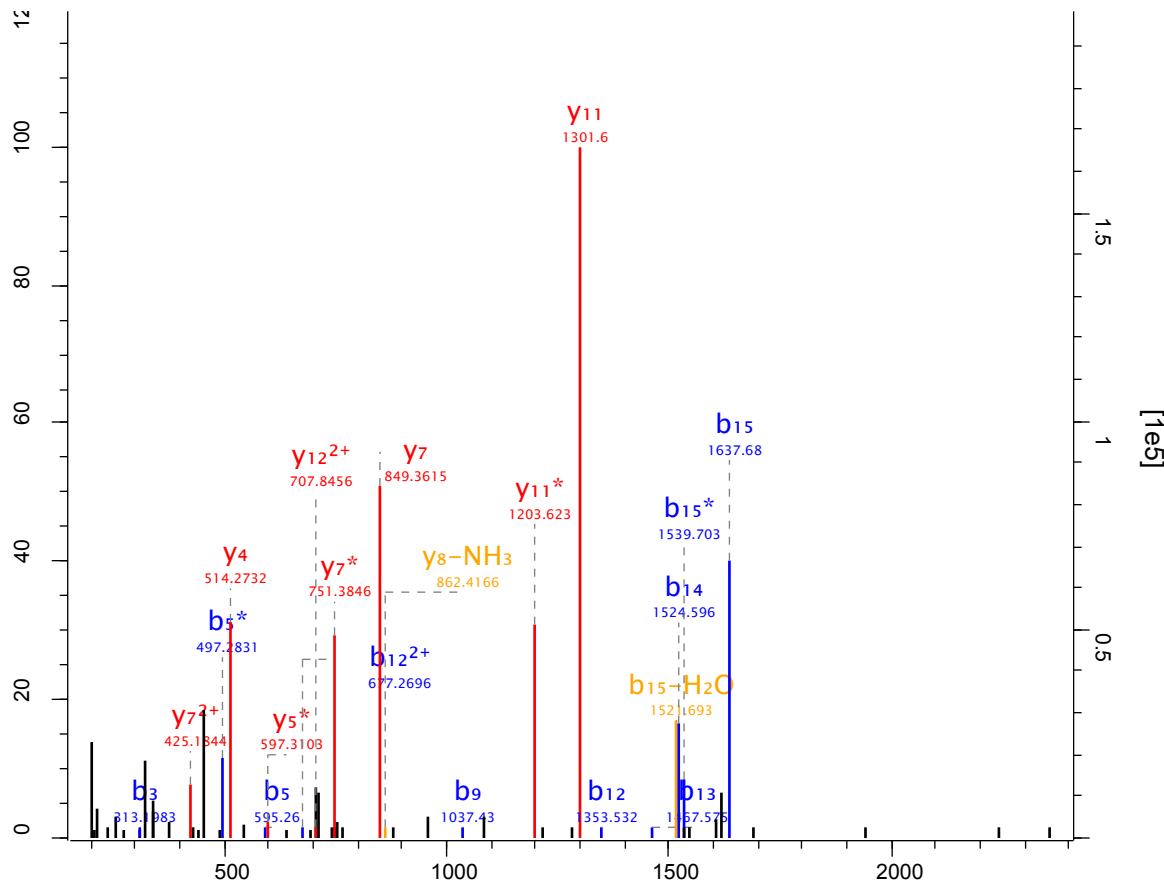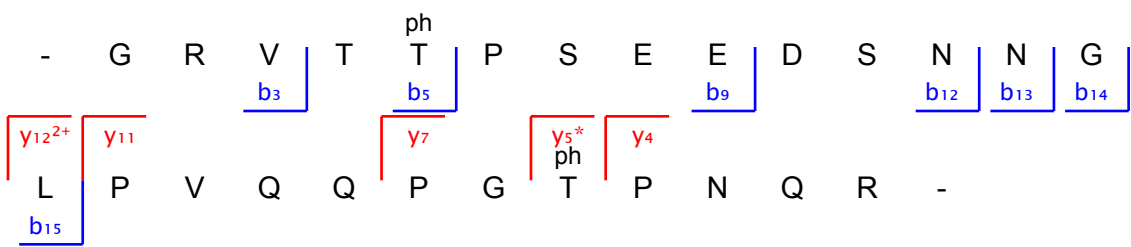

Raw file 2013\_COL15\_30\_34 Scan 15886 Method FTMS; HCD Score 102.07 m/z 627.29

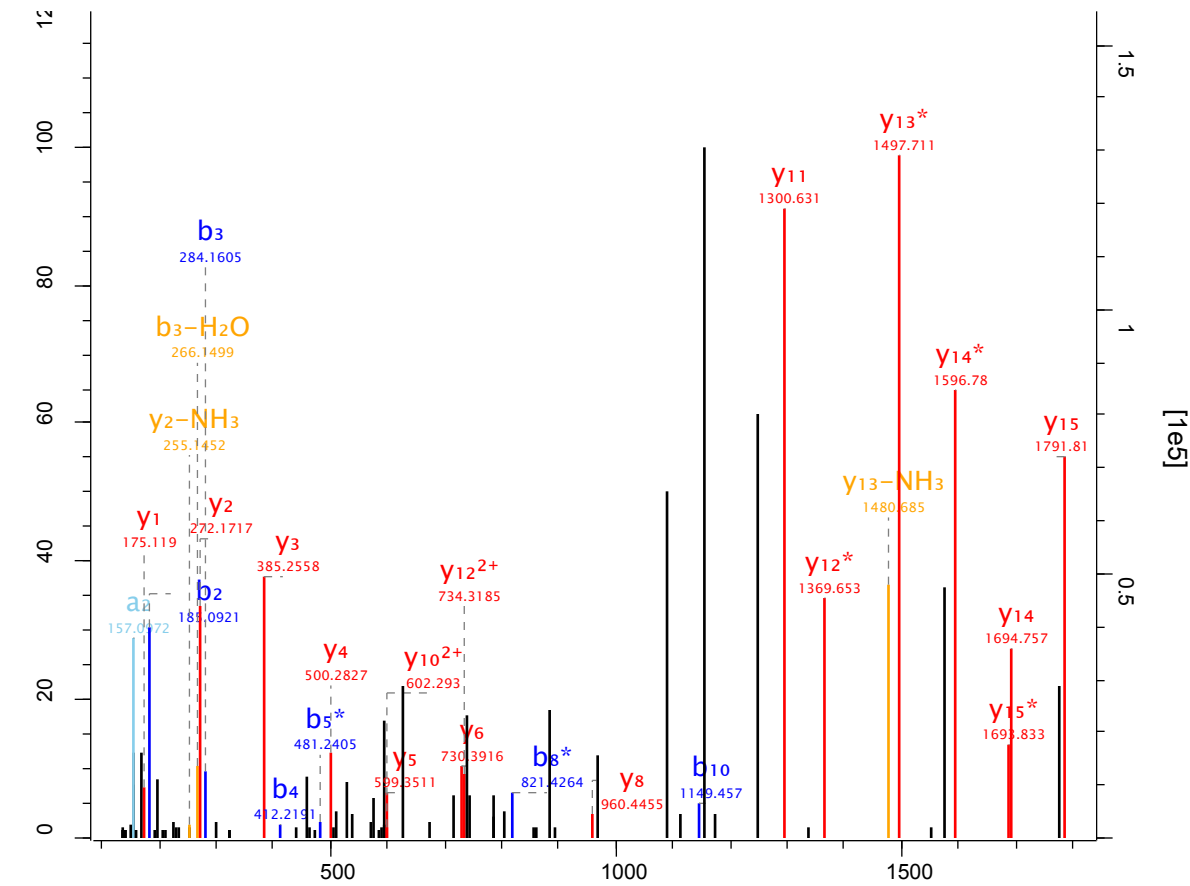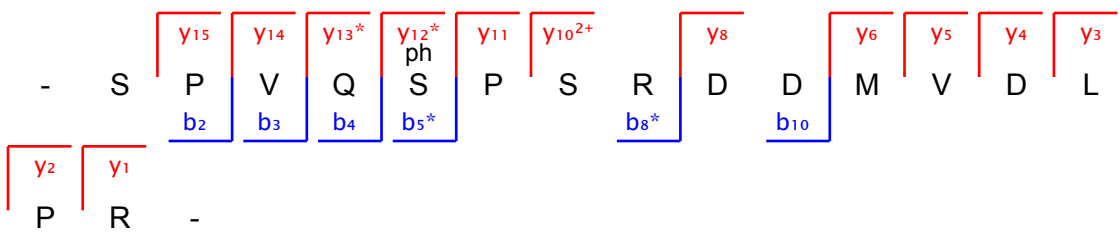



| Raw file         | Scan  | Method    | Score | m/z    |
|------------------|-------|-----------|-------|--------|
| 2013_COL15_30_34 | 16018 | FTMS; HCD | 73.72 | 453.53 |

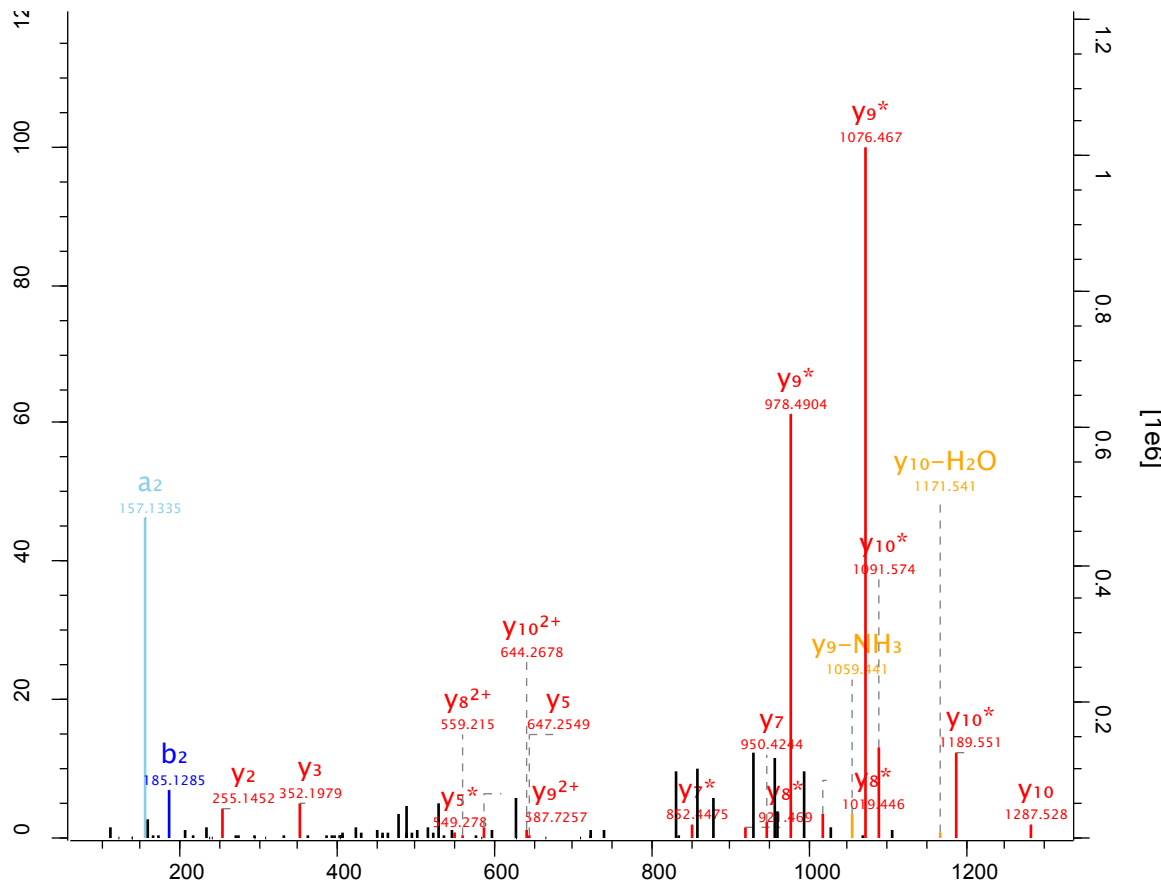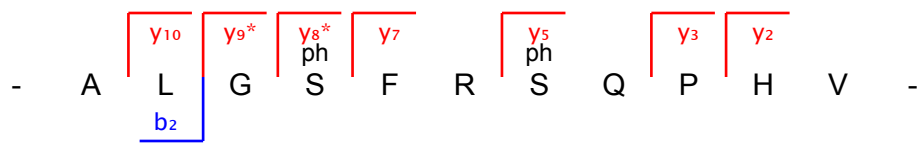

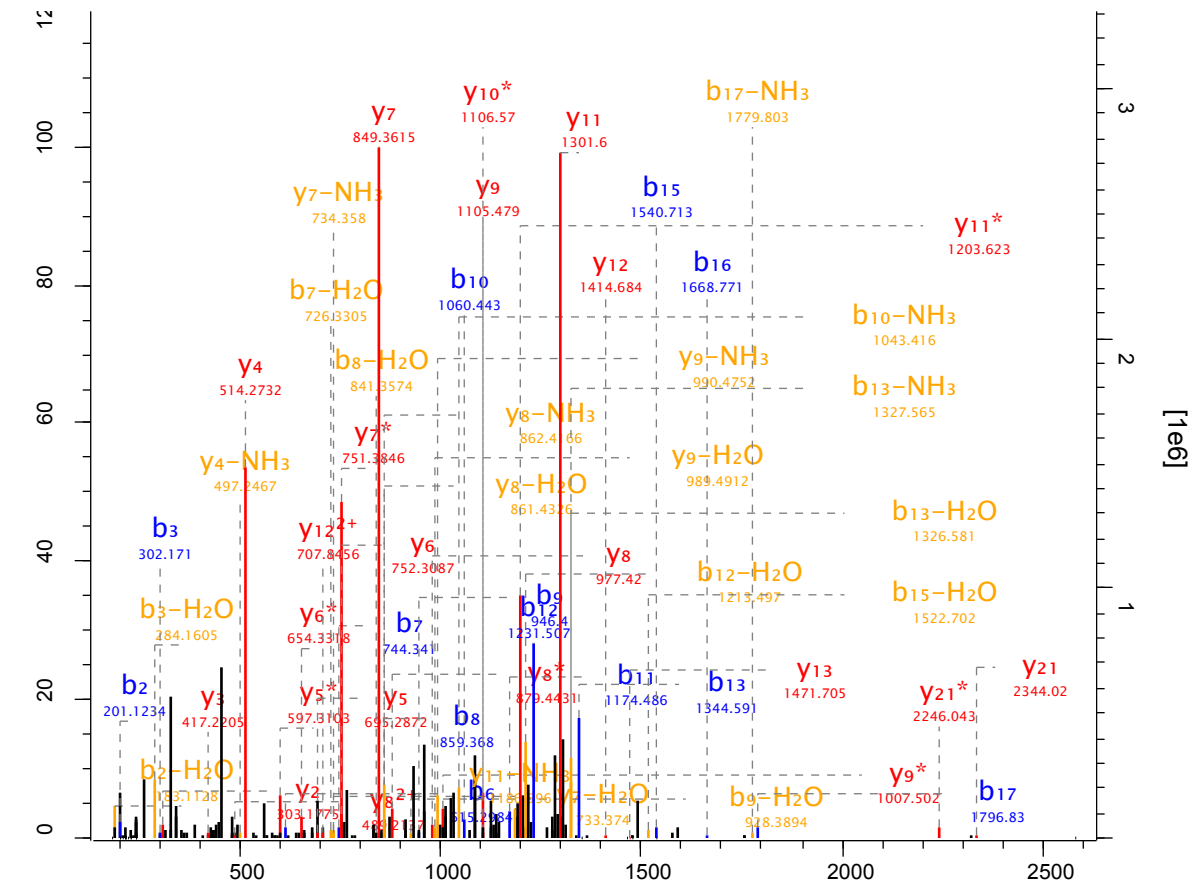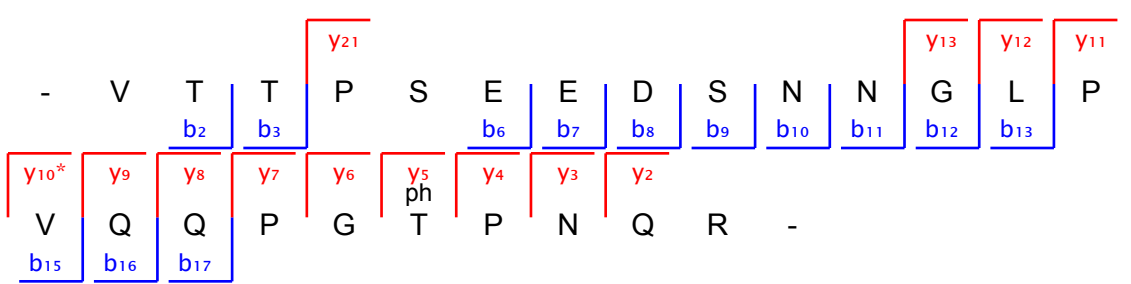

| Raw file         | Scan  | Method    | Score | m/z    |
|------------------|-------|-----------|-------|--------|
| 2013_COL15_30_34 | 16642 | FTMS; HCD | 43.59 | 728.33 |

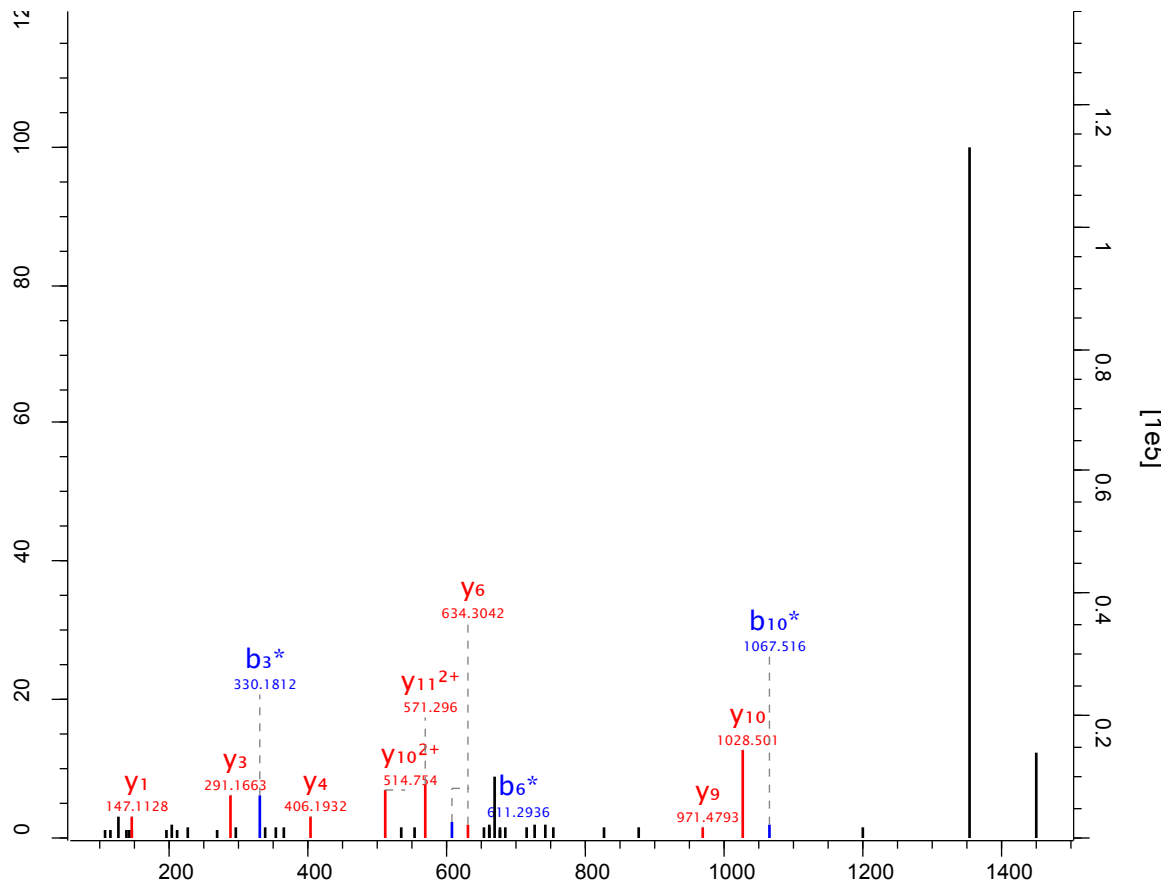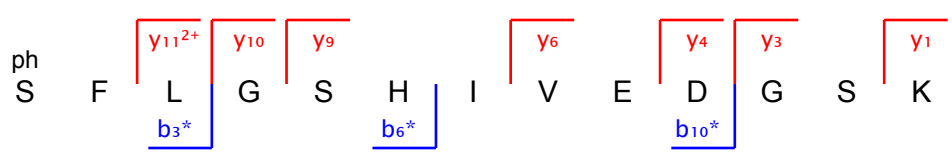

Raw file: 2013\_COL15\_30\_34 Scan: 16798 Method: FTMS; HCD Score: 133.75 m/z: 536.25

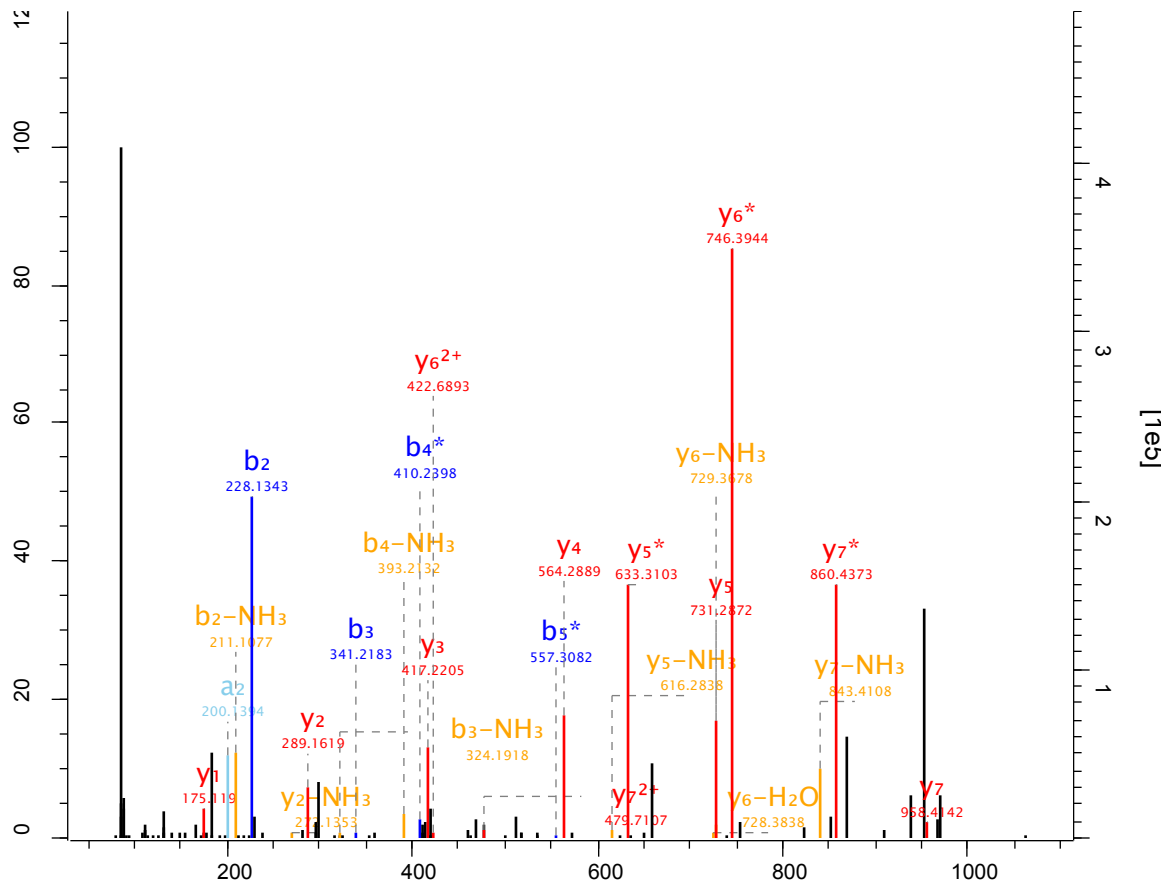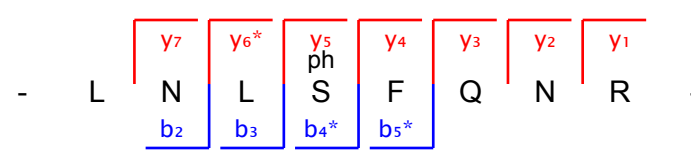

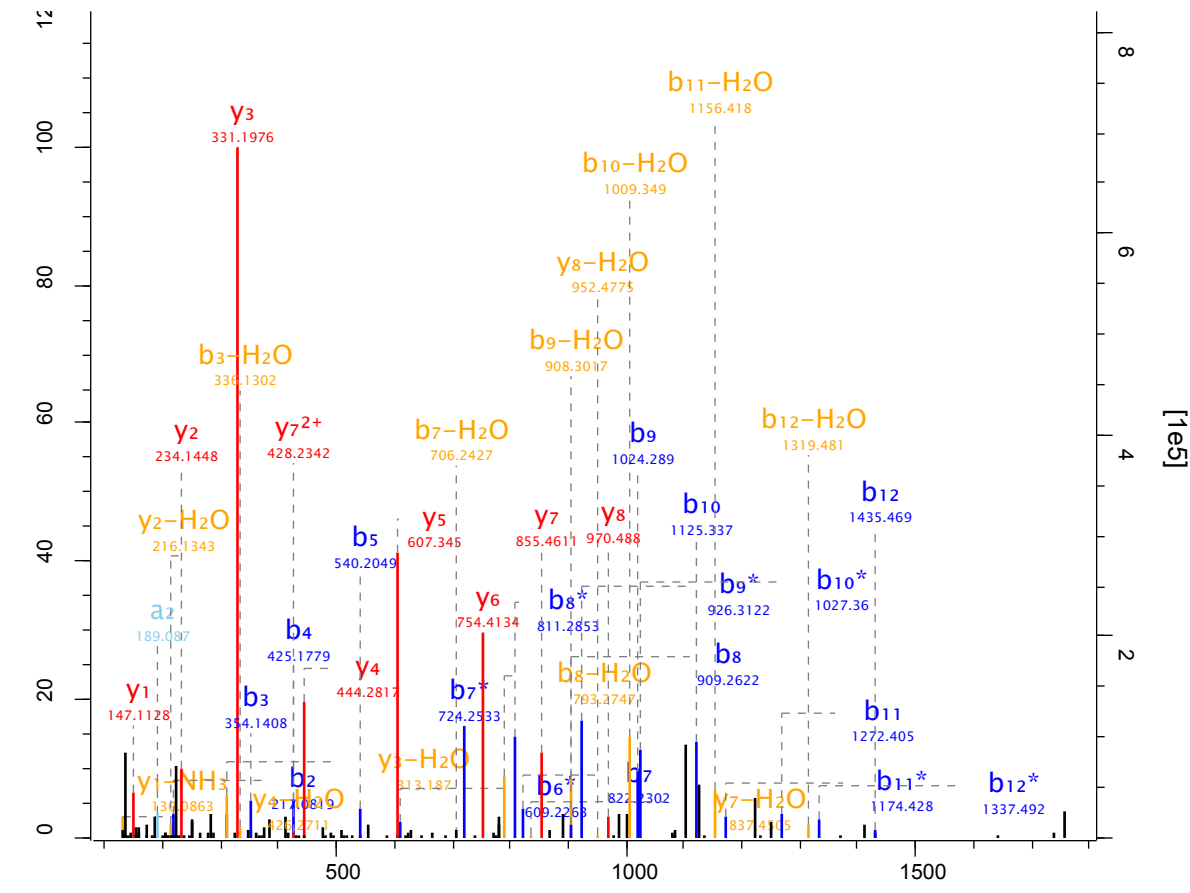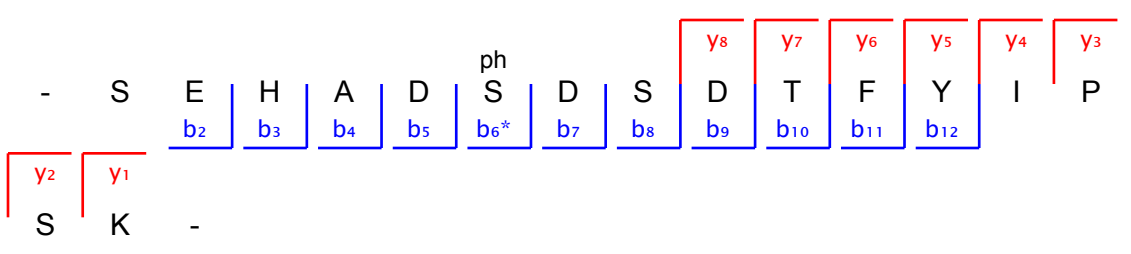

Raw file 2013\_COL15\_30\_34 Scan 16974 Method FTMS; HCD Score 100.44 m/z 714.34

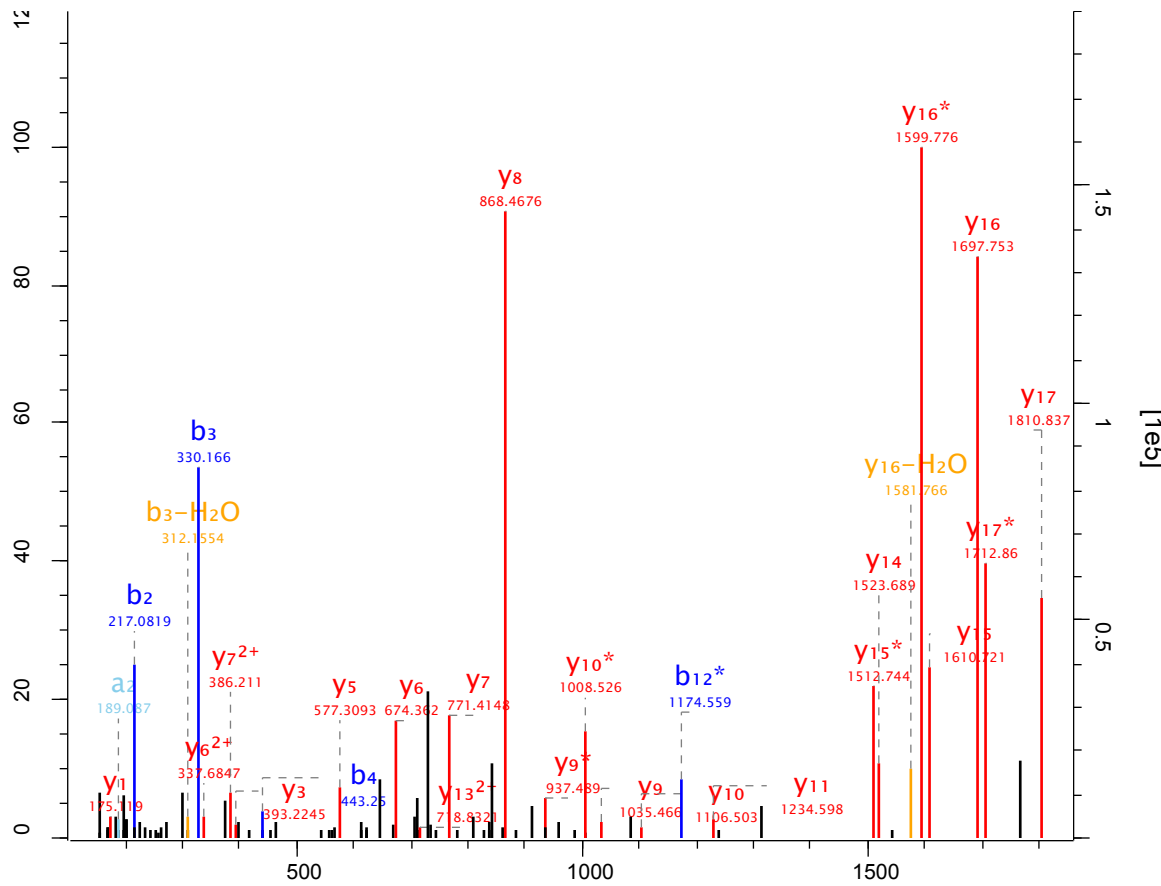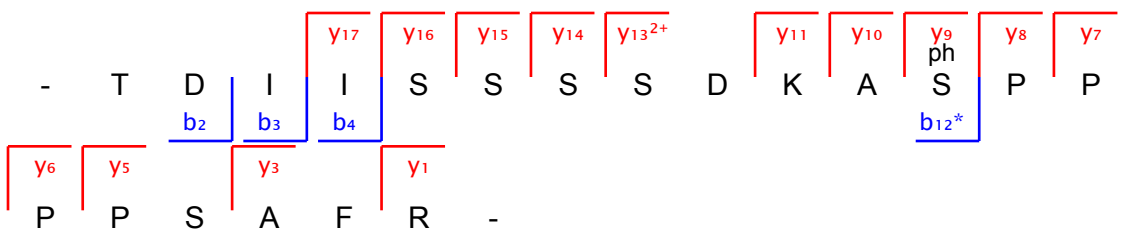

Raw file Scan Method Score m/z  
 2013\_COL15\_30\_34 17121 FTMS; HCD 96.79 872.71

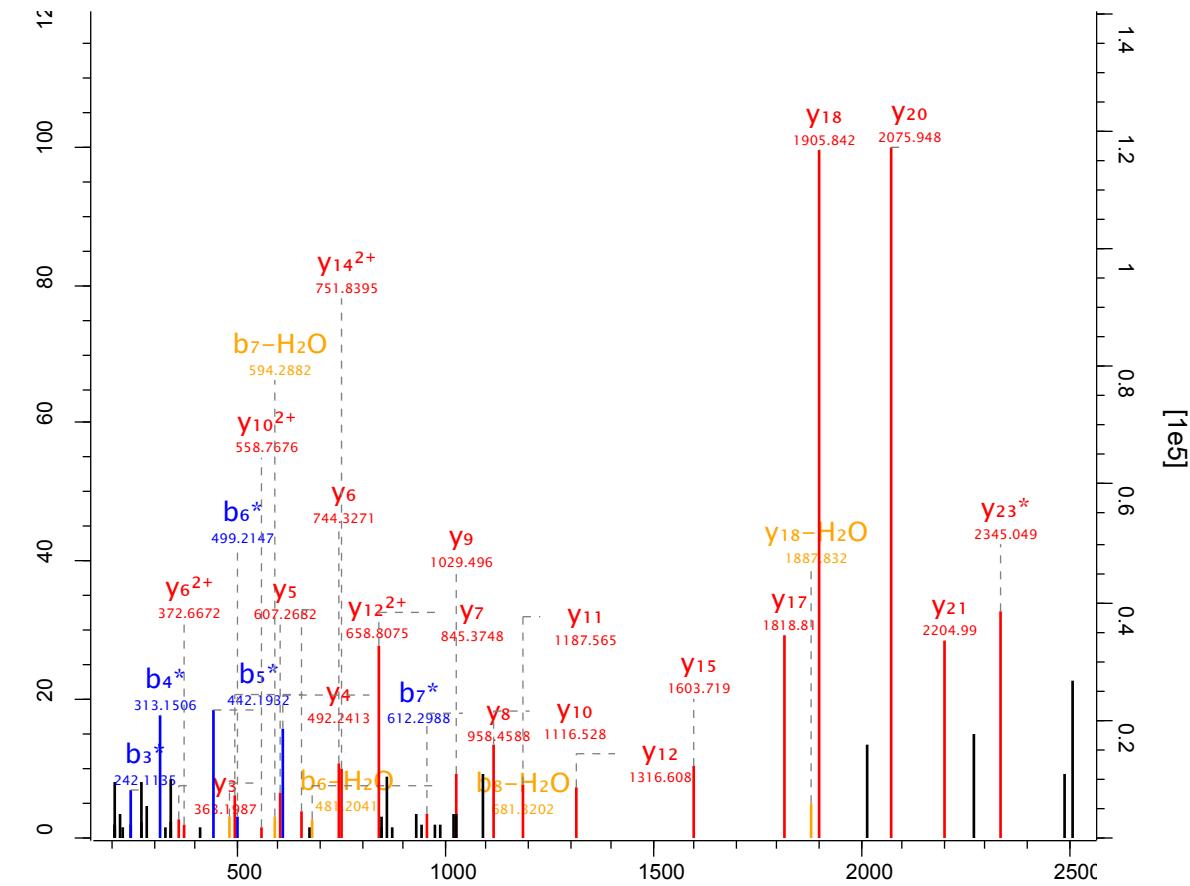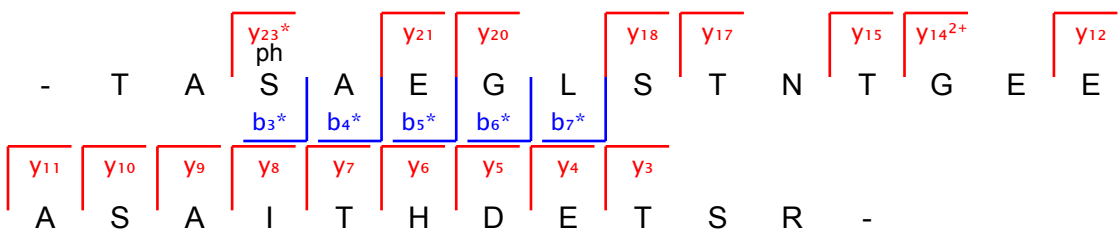

| Raw file         | Scan  | Method    | Score | m/z    |
|------------------|-------|-----------|-------|--------|
| 2013_COL15_30_34 | 17482 | FTMS; HCD | 52.25 | 600.75 |

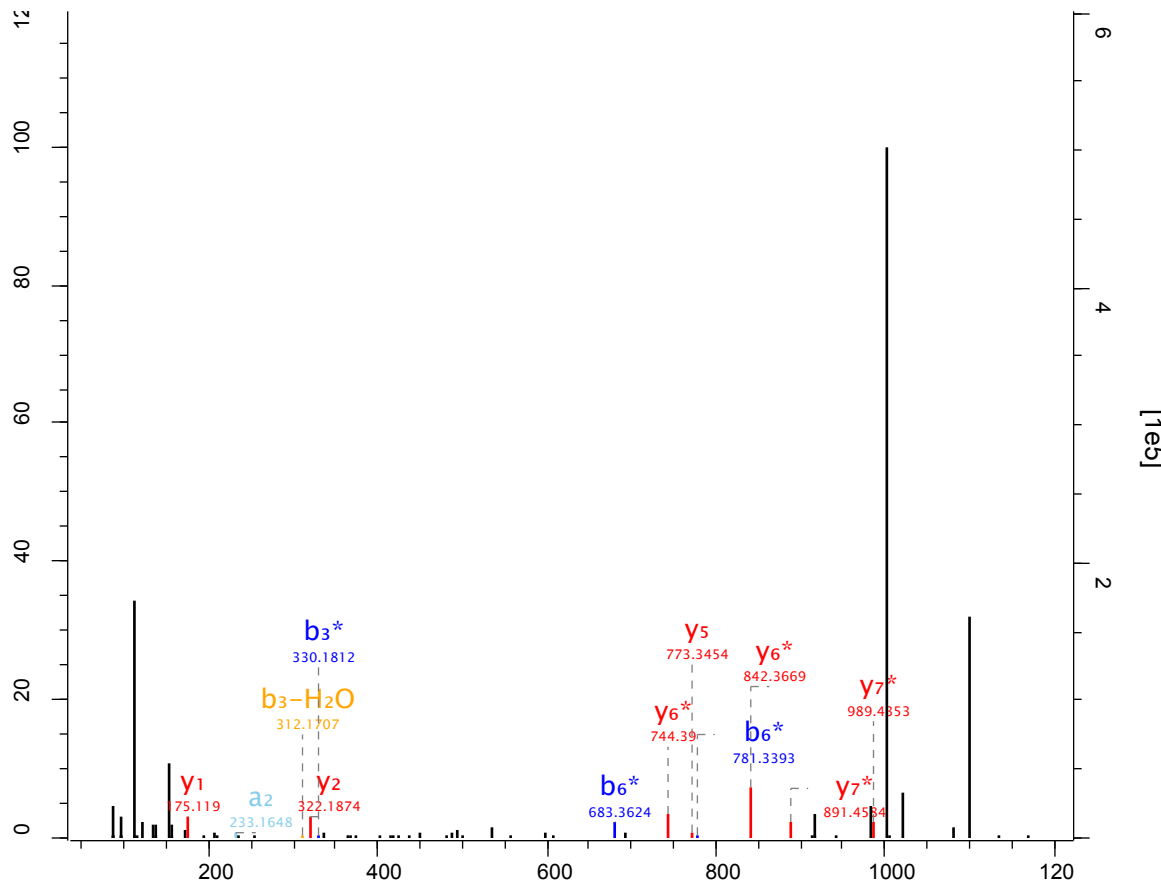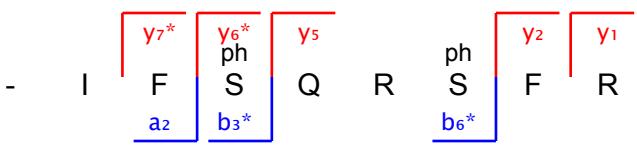



Raw file Scan Method Score m/z  
 2013\_COL15\_30\_34 17514 FTMS; HCD 106.12 713.34

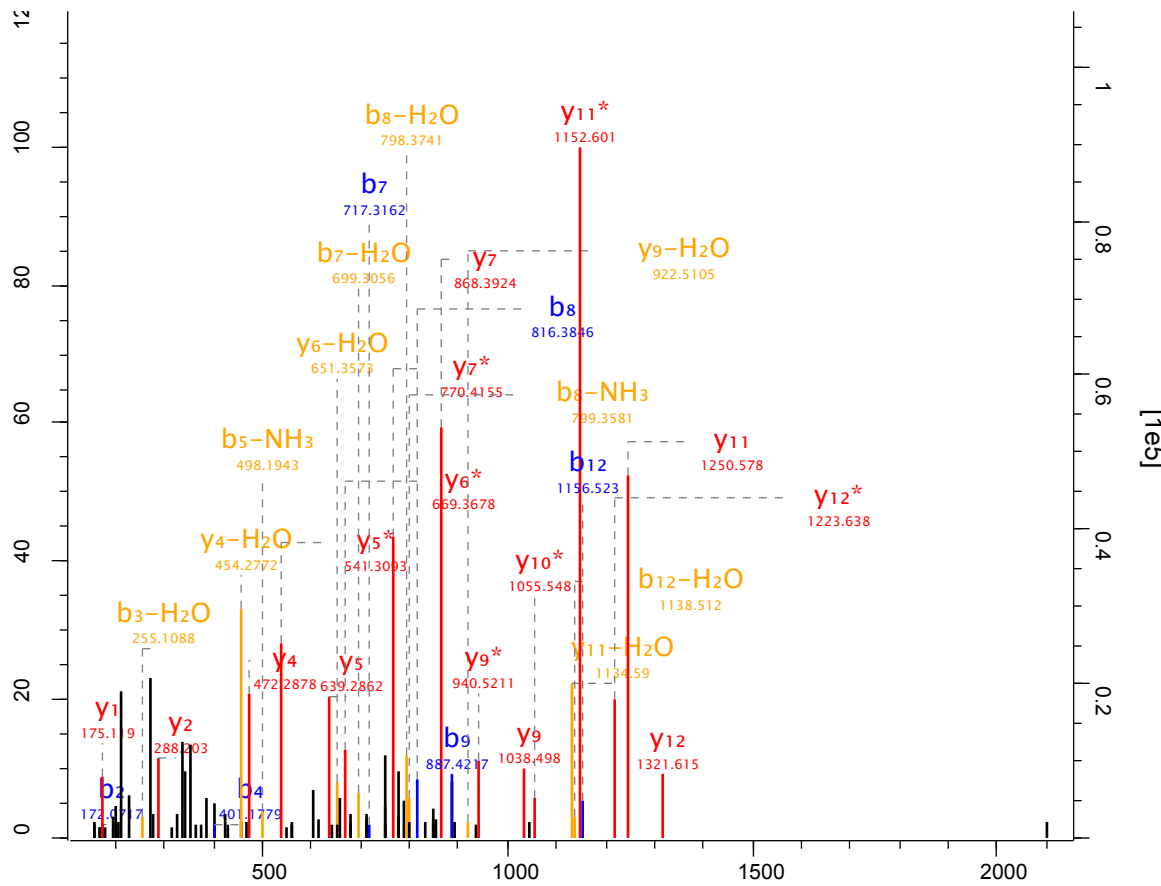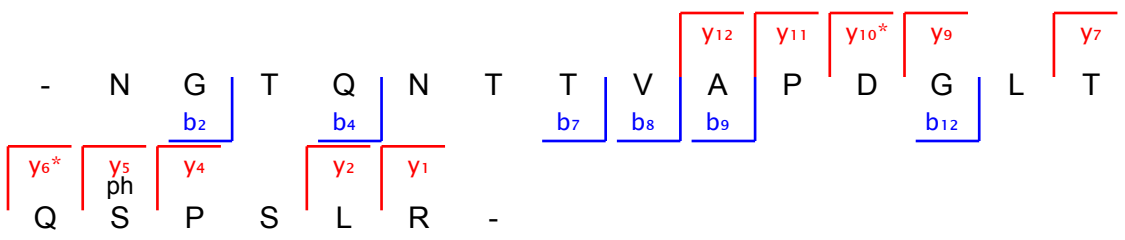

Raw file Scan Method Score m/z  
 2013\_COL15\_30\_34 17541 FTMS; HCD 67.22 774

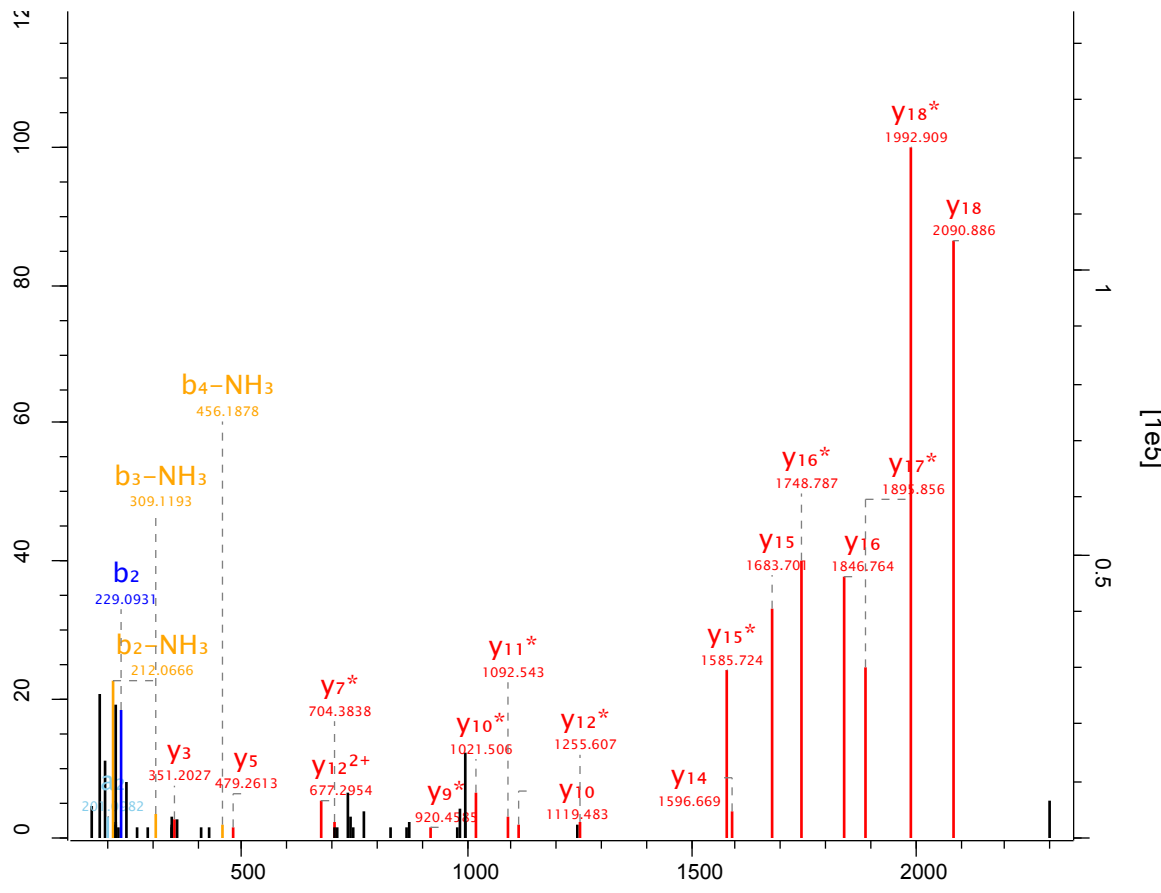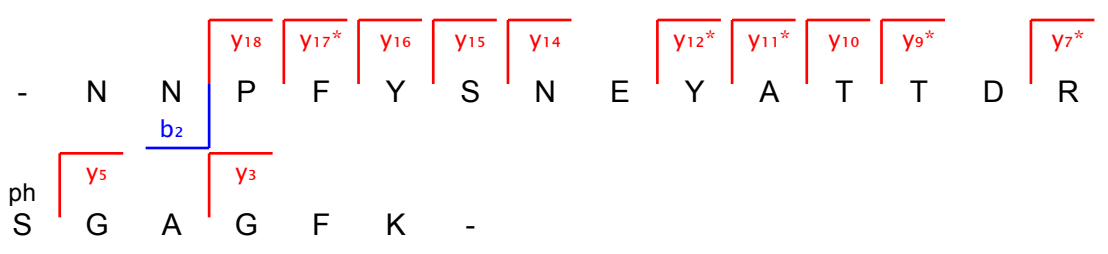

Raw file Scan Method Score m/z  
 2013\_COL15\_30\_34 17549 FTMS; HCD 46.56 842.05

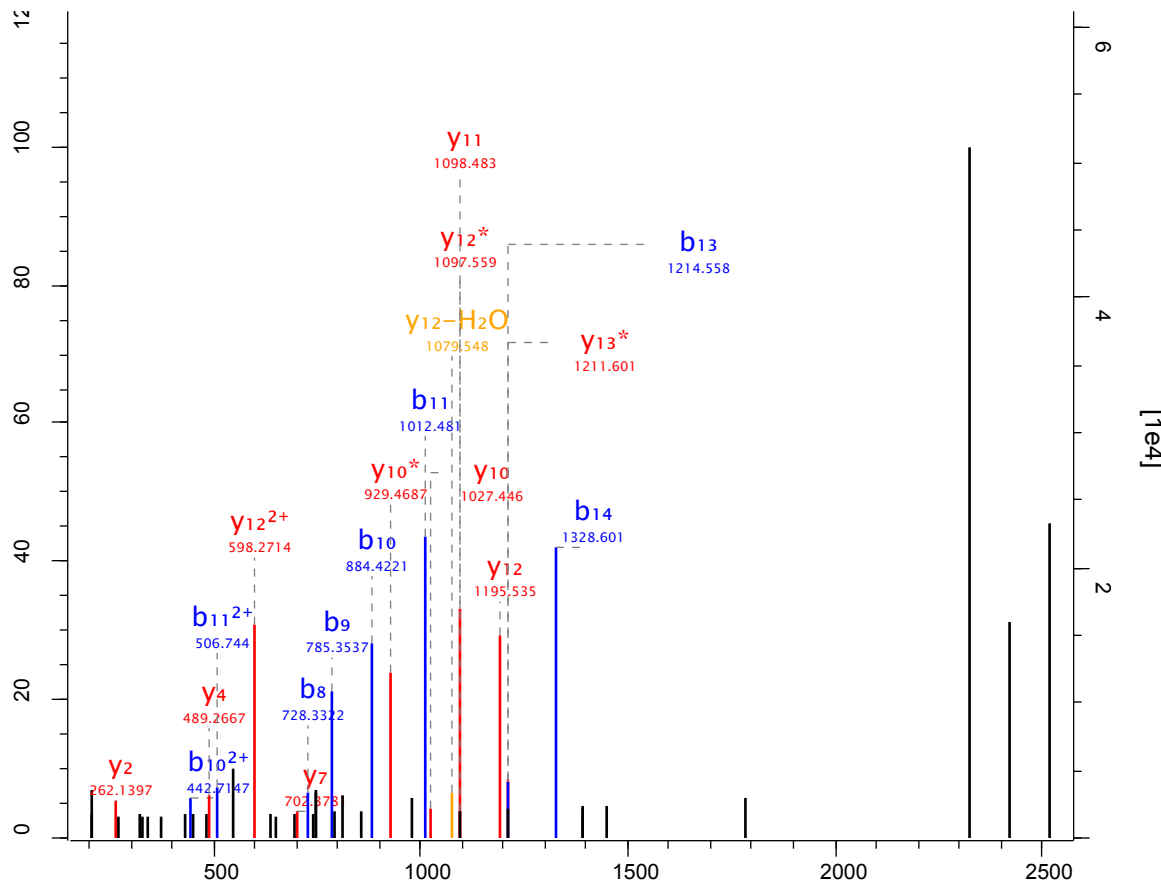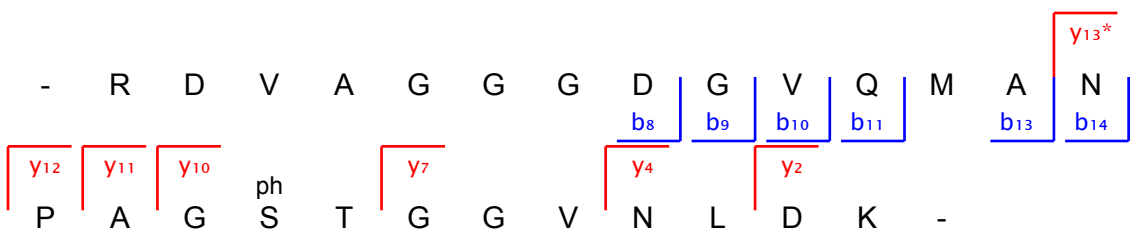

Raw file Scan Method Score m/z  
 2013\_COL15\_30\_34 17628 FTMS; HCD 66.06 512.73

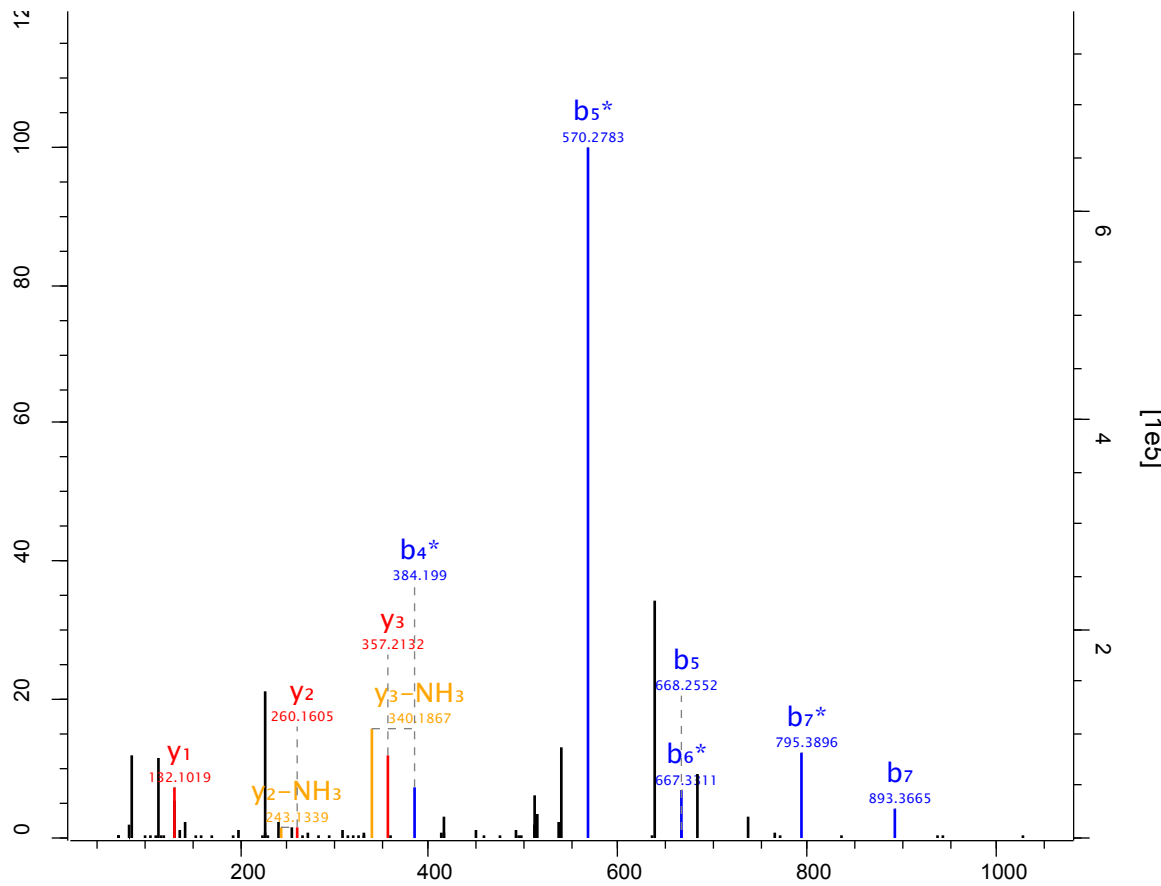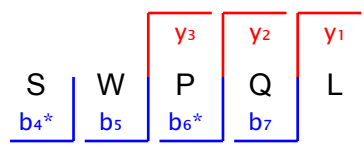

Raw file Scan Method Score m/z  
 2013\_COL15\_30\_34 17669 FTMS; HCD 71.78 554.23

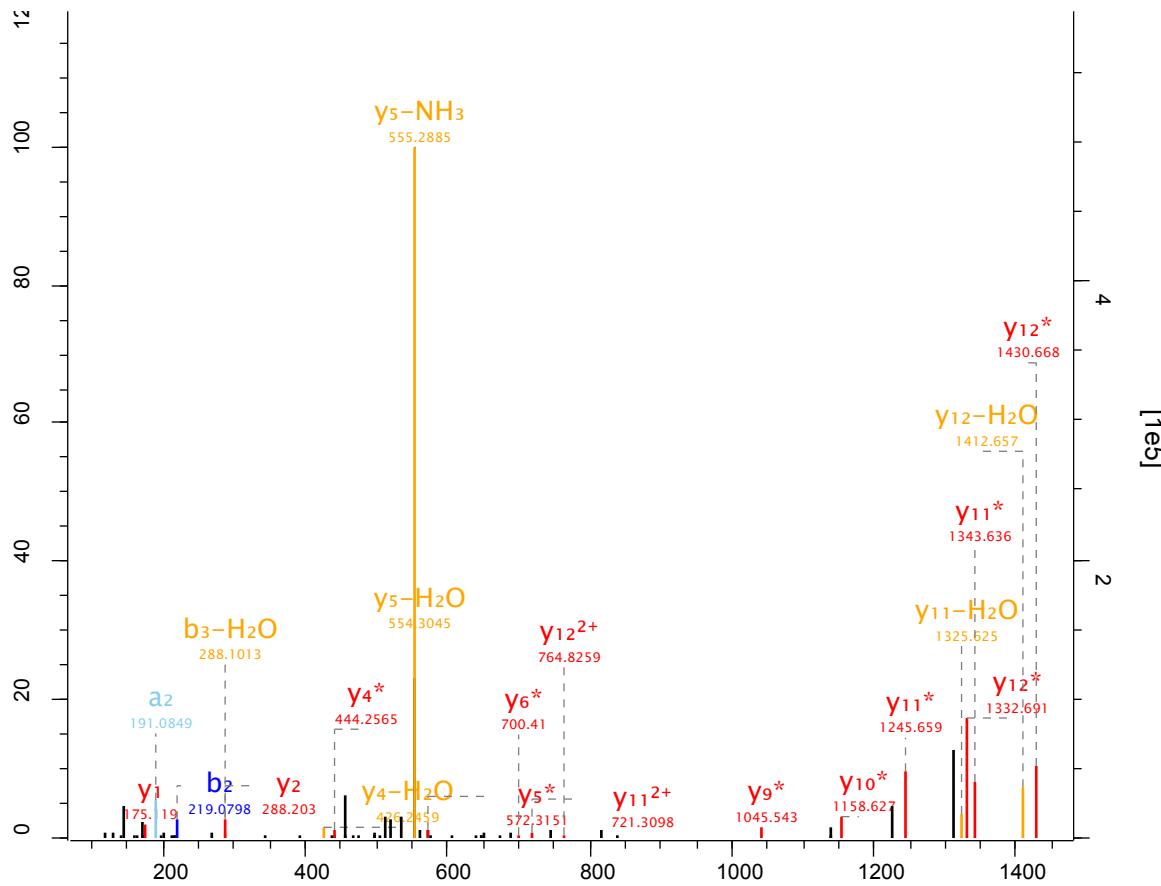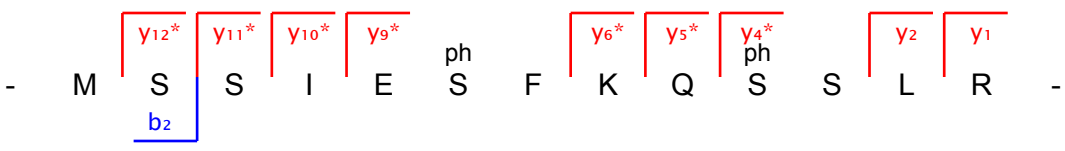

Raw file

Scan Method

Score m/z

2013\_COL15\_30\_34

17891

FTMS; HCD

43.35

728

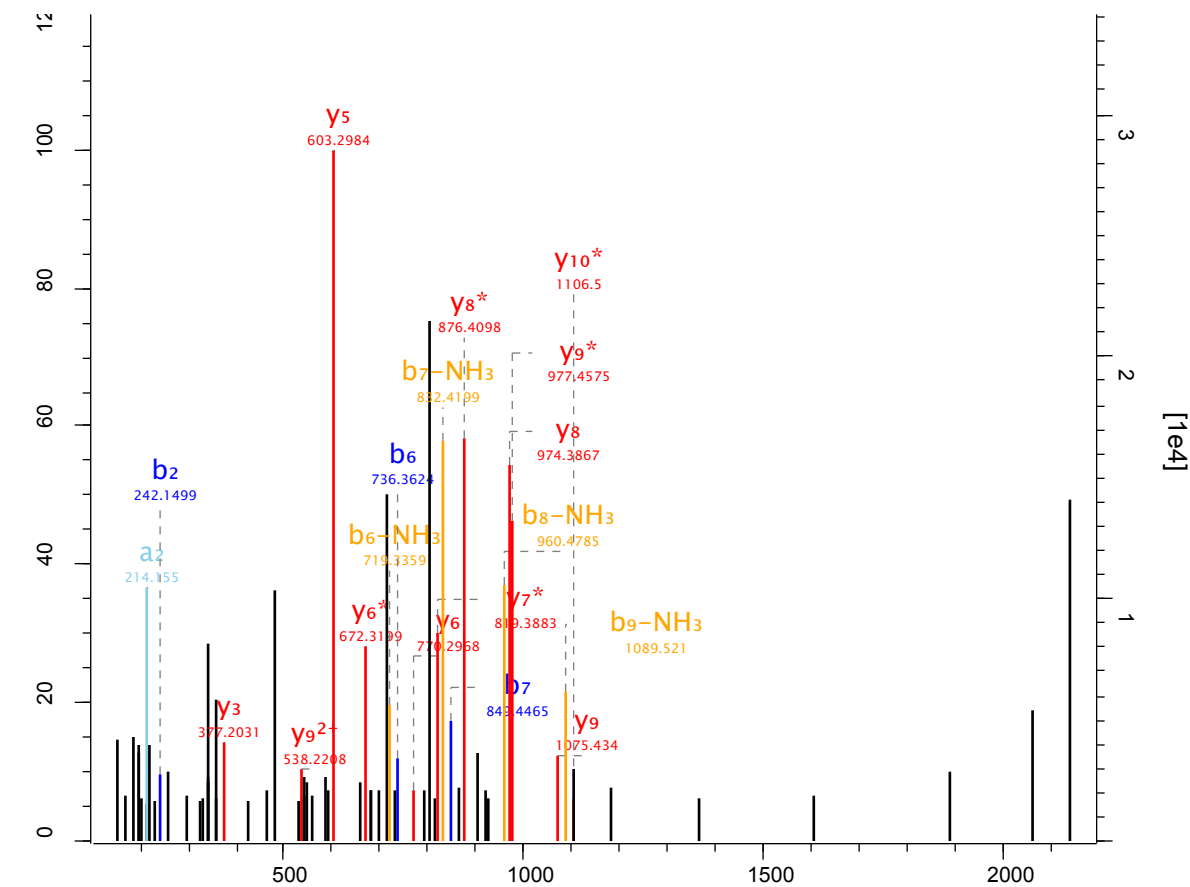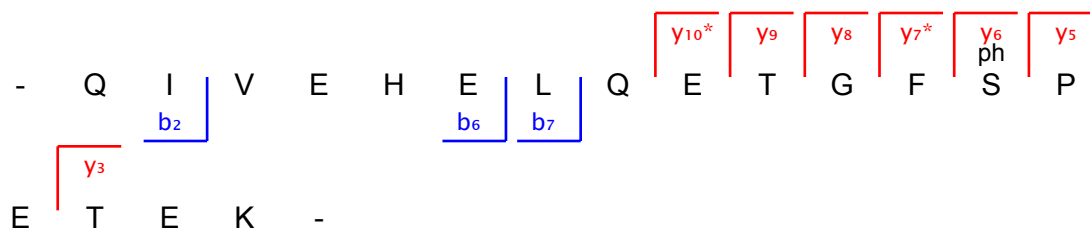



Raw file Scan Method Score m/z  
 2013\_COL15\_30\_34 18124 FTMS; HCD 105.38 621.29

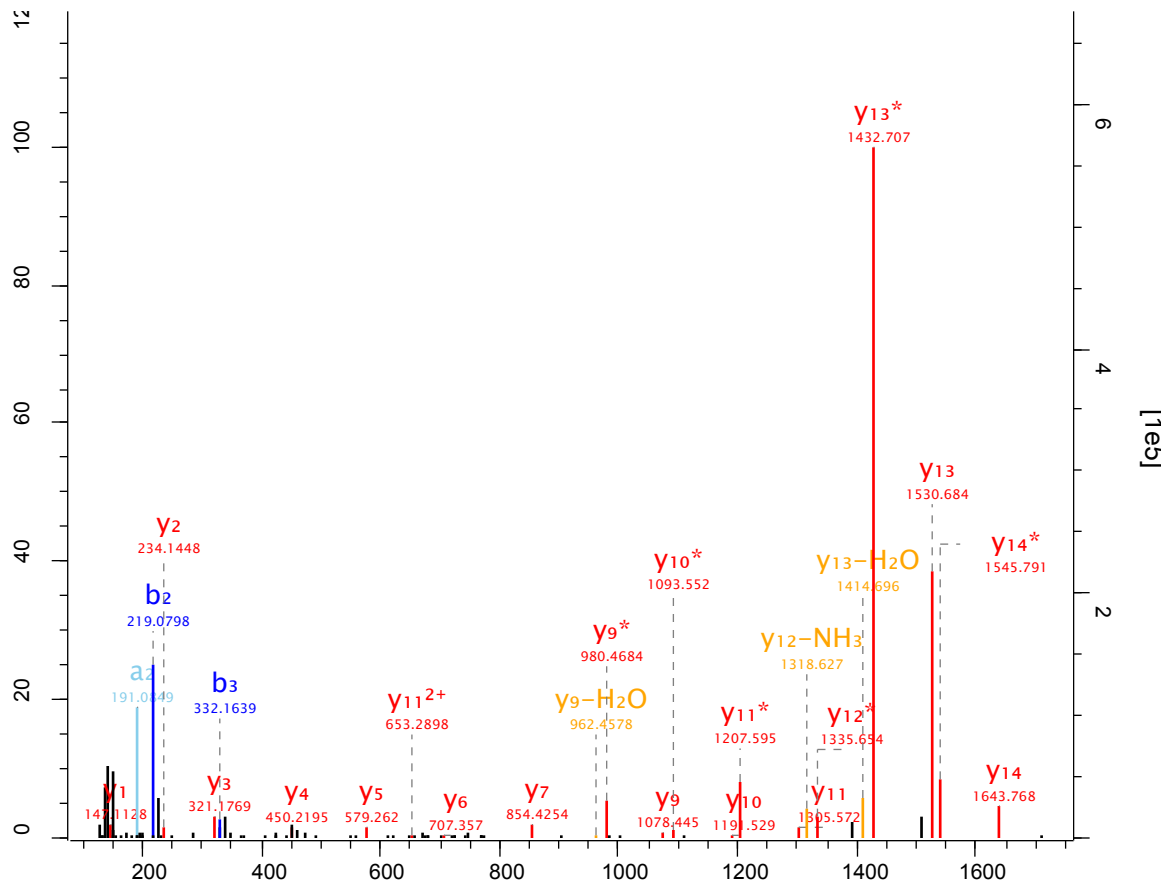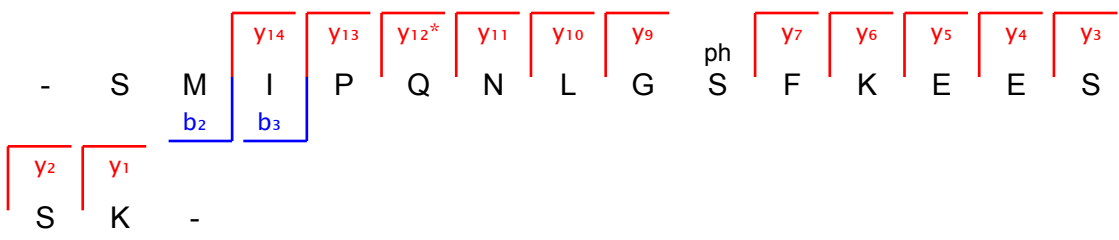



Raw file Scan Method Score m/z  
 2013\_COL15\_30\_34 18147 FTMS; HCD 66.02 557.93

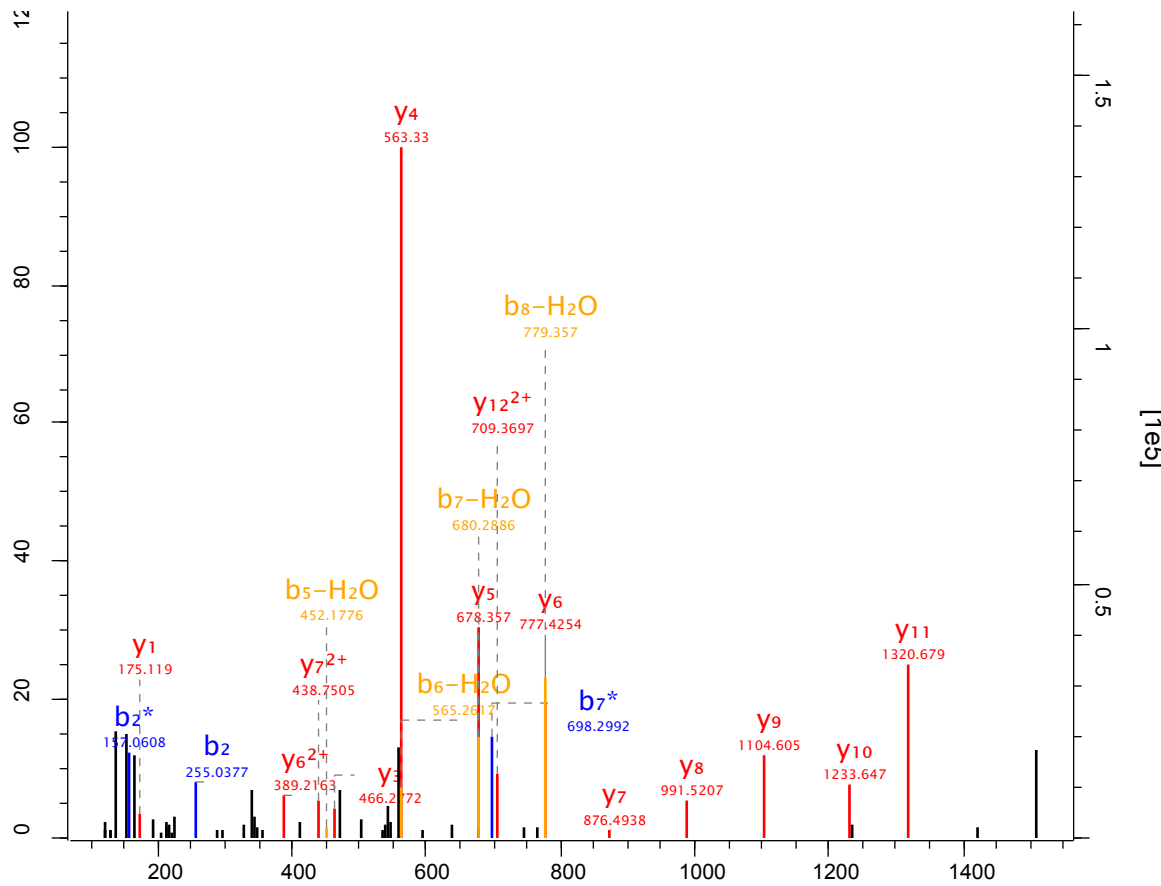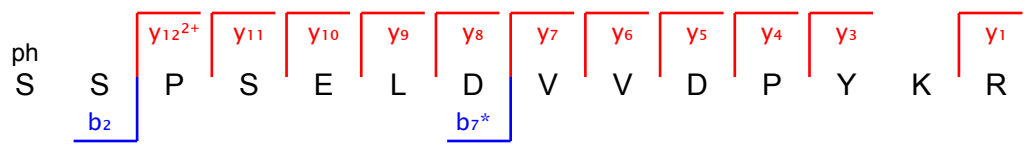

Raw file Scan Method Score m/z  
 2013\_COL15\_30\_34 18678 FTMS; HCD 133.47 487.56

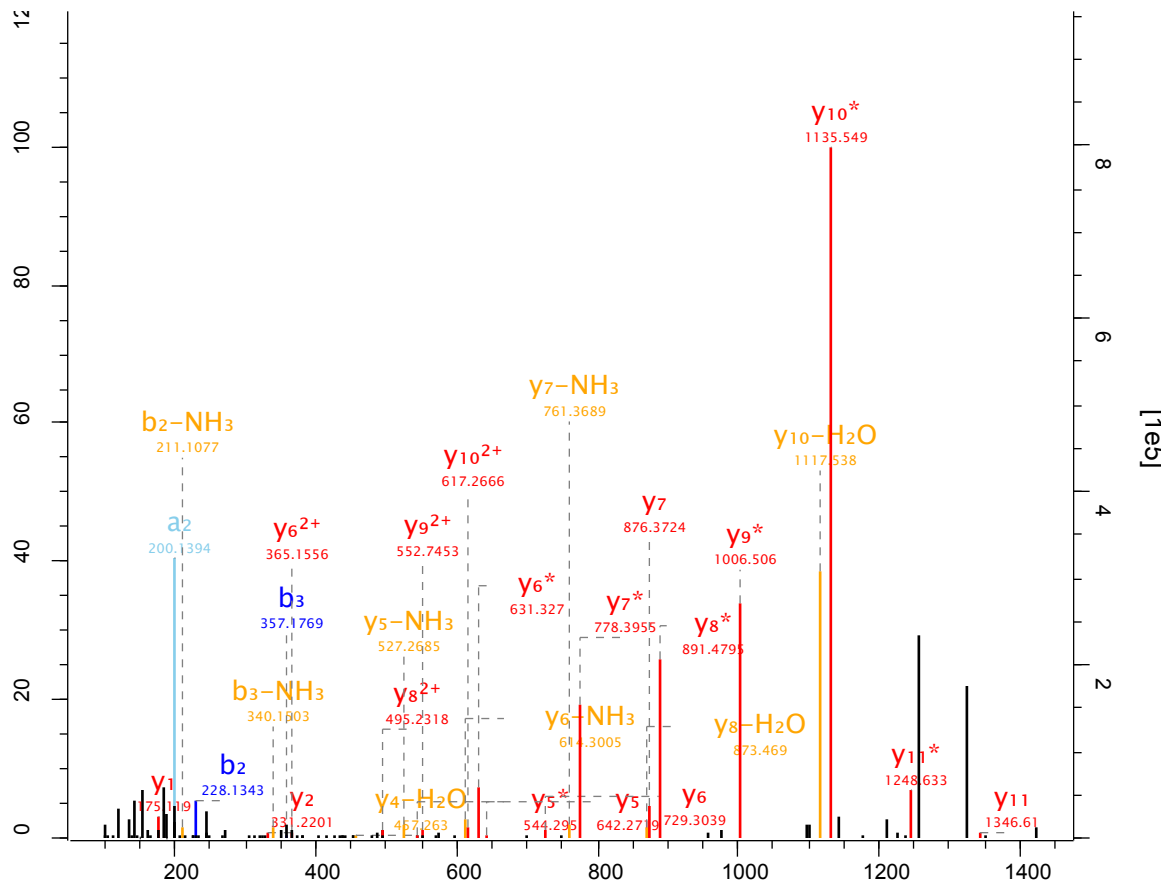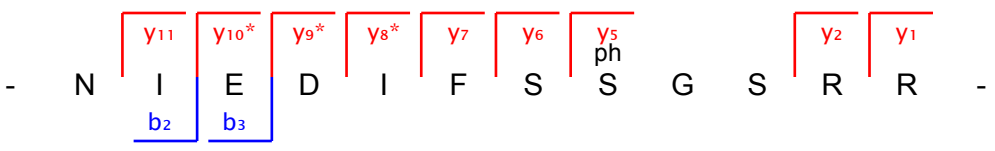

Raw file Scan Method Score m/z  
 2013\_COL15\_30\_34 19247 FTMS; HCD 69.7 872.38

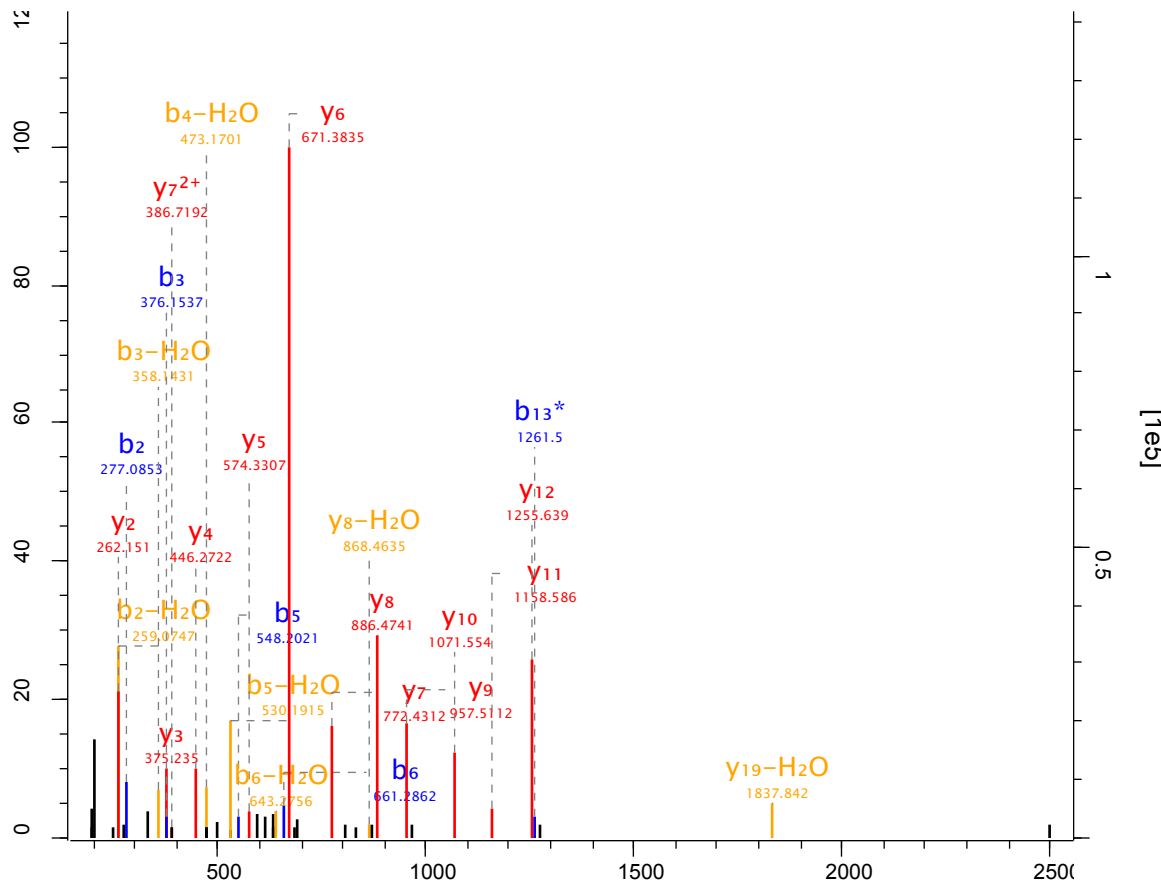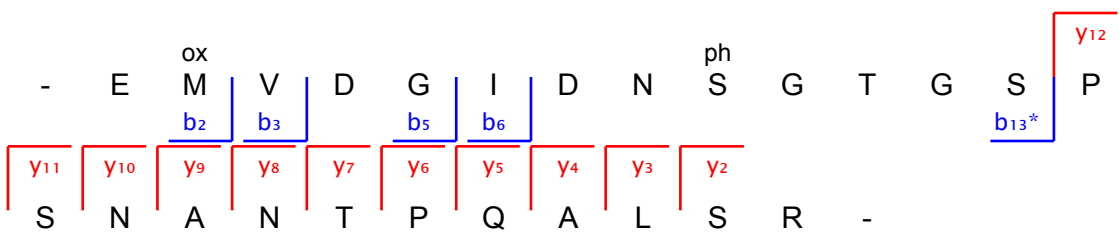

Raw file 2013\_COL15\_30\_34 Scan 19336 Method FTMS; HCD Score 48.6 m/z 828.08

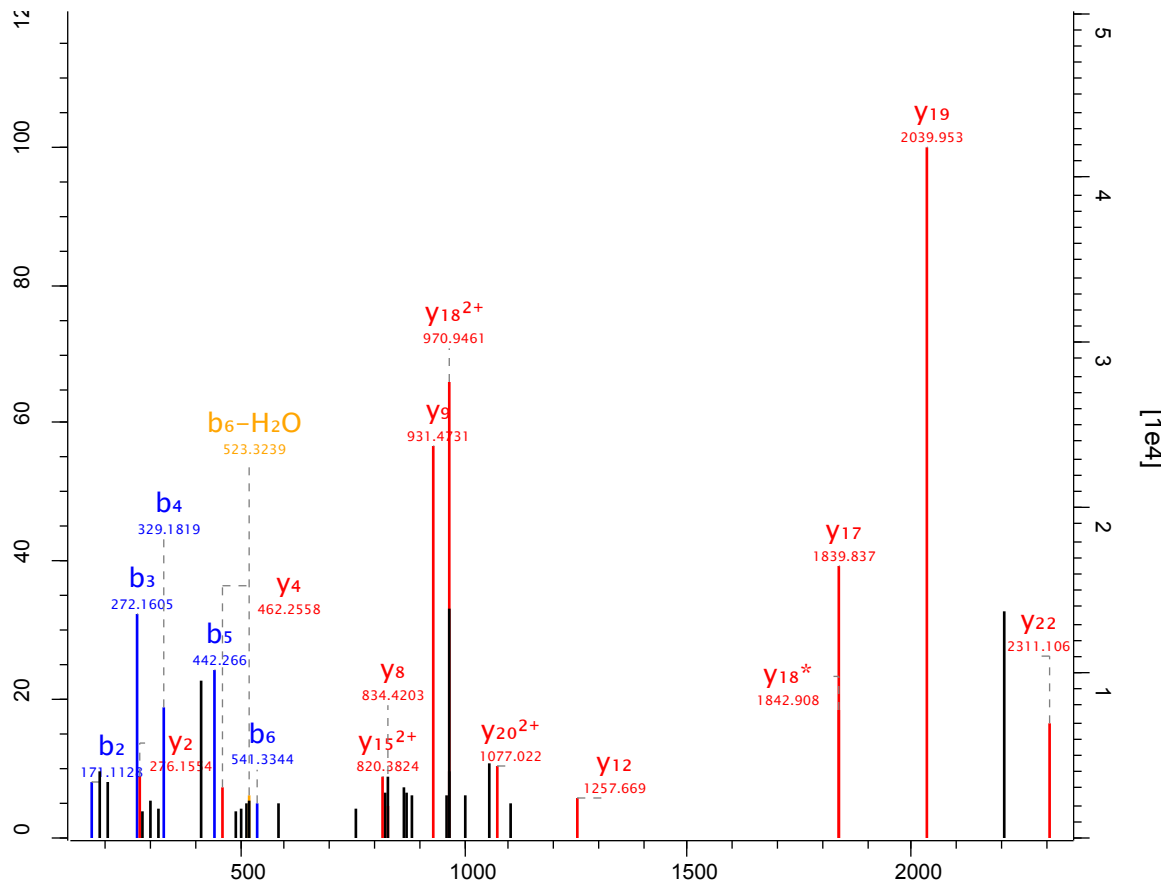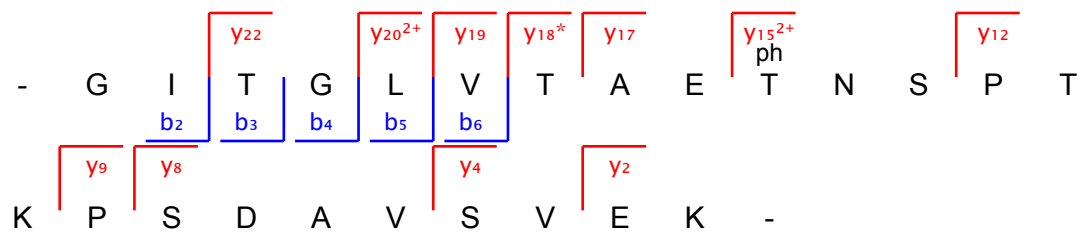

Raw file Scan Method Score m/z  
 2013\_COL15\_30\_34 19394 FTMS; HCD 82.63 642.96

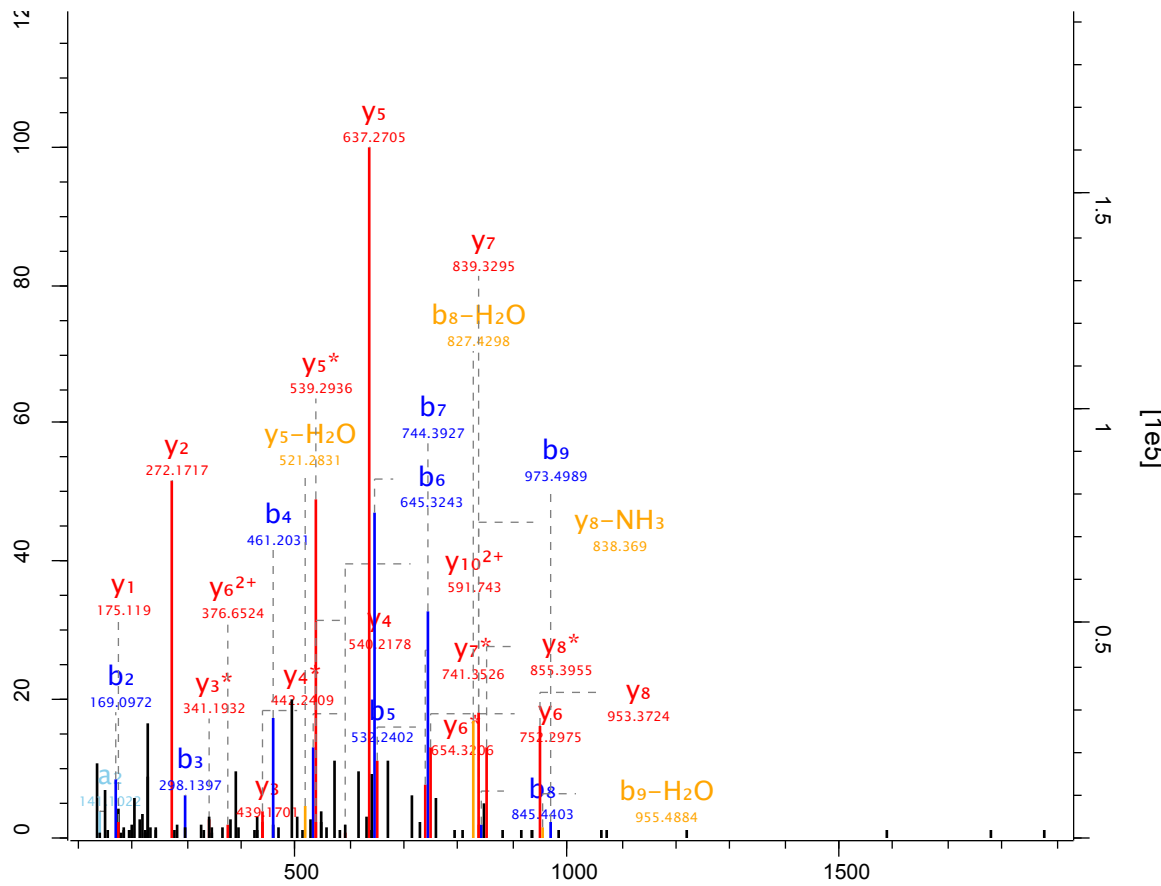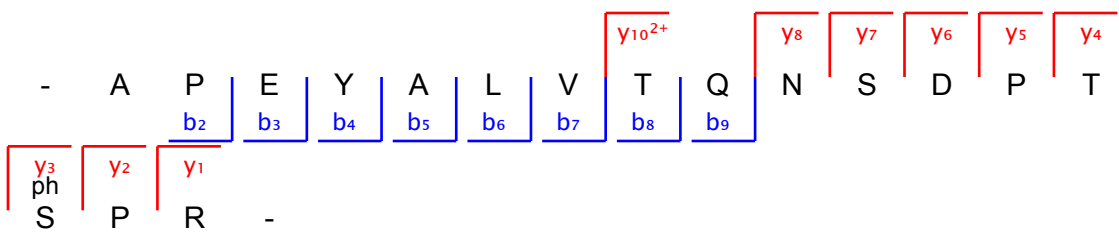



Raw file Scan Method Score m/z  
 2013\_COL15\_30\_34 19529 FTMS; HCD 48.91 715.8

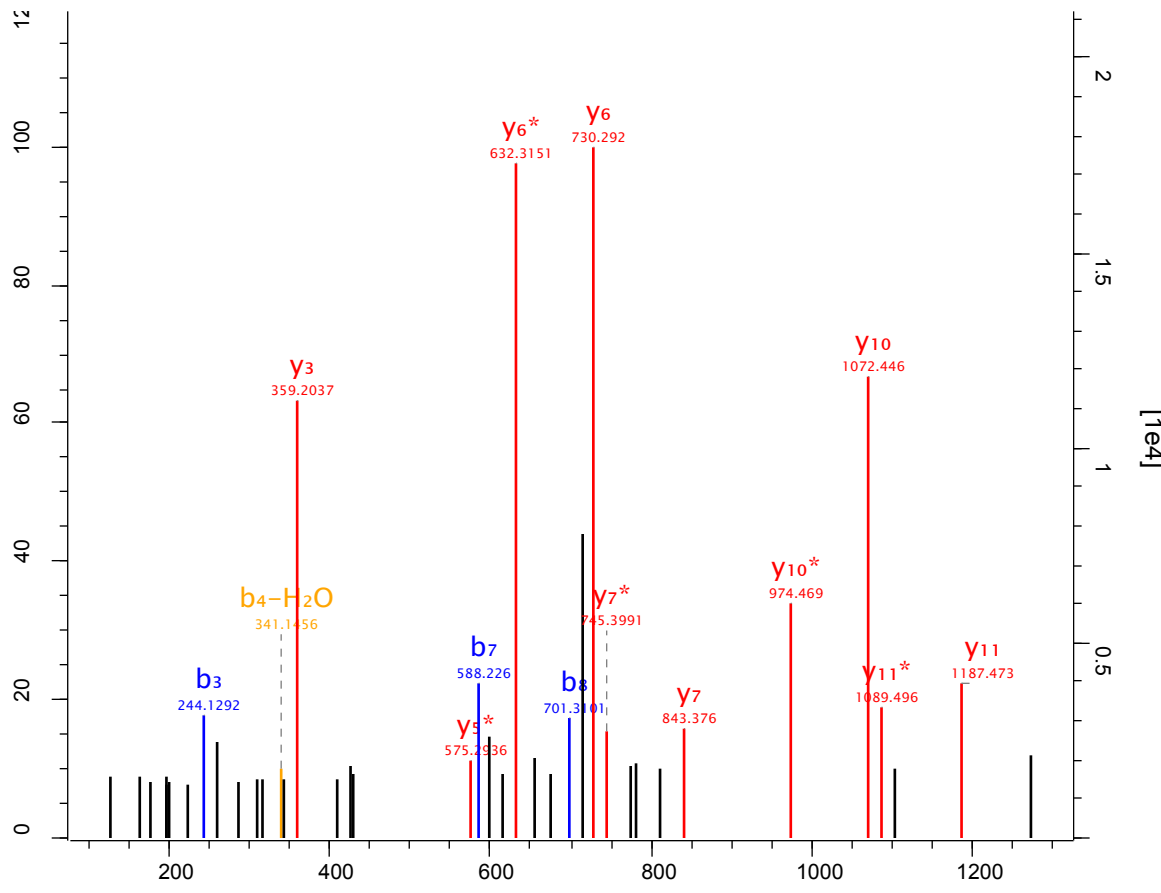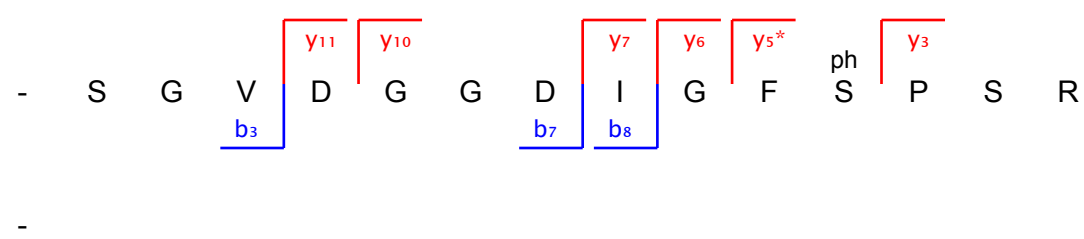

Raw file Scan Method Score m/z  
 2013\_COL15\_30\_34 19636 FTMS; HCD 68.46 833.06

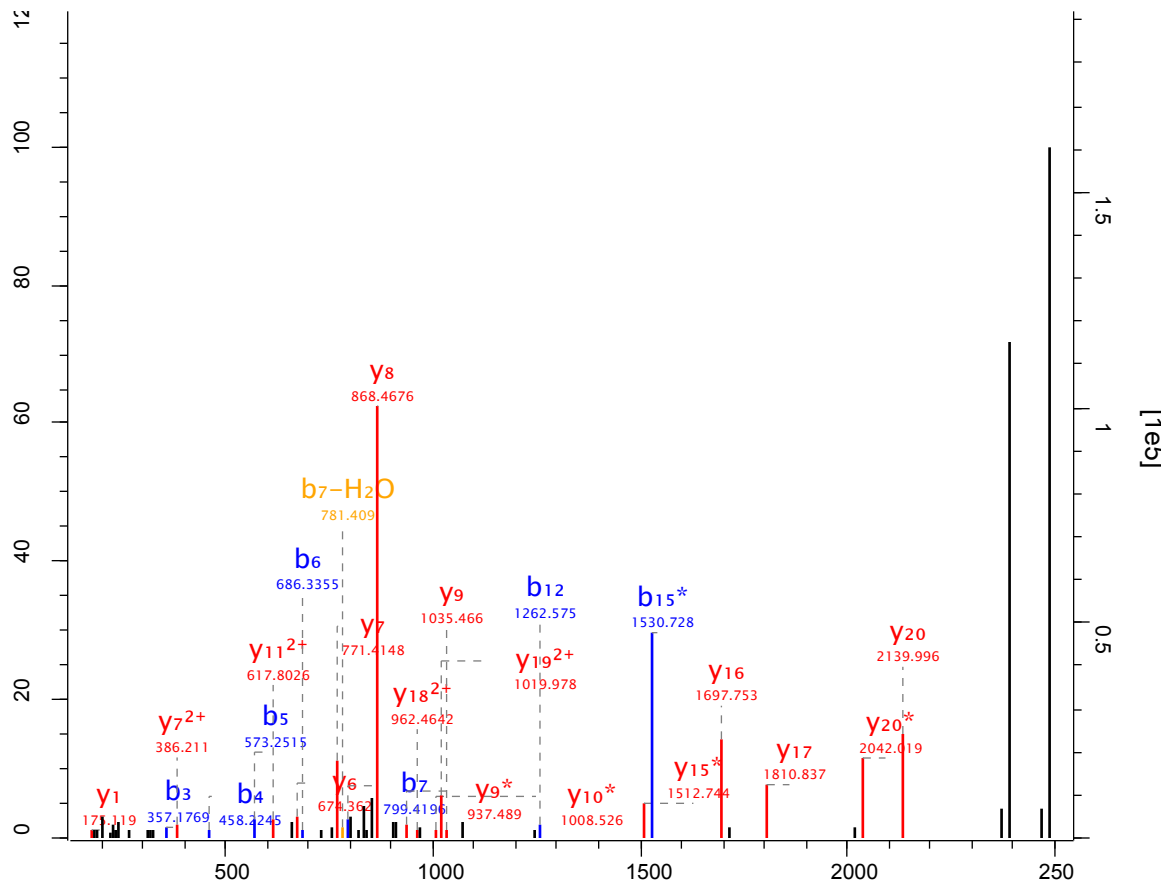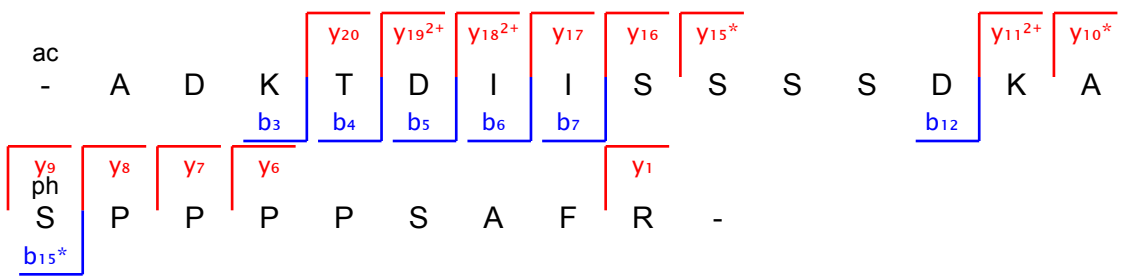



Raw file 2013\_COL15\_30\_34 Scan 19843 Method FTMS; HCD Score 68.04 m/z 658.79

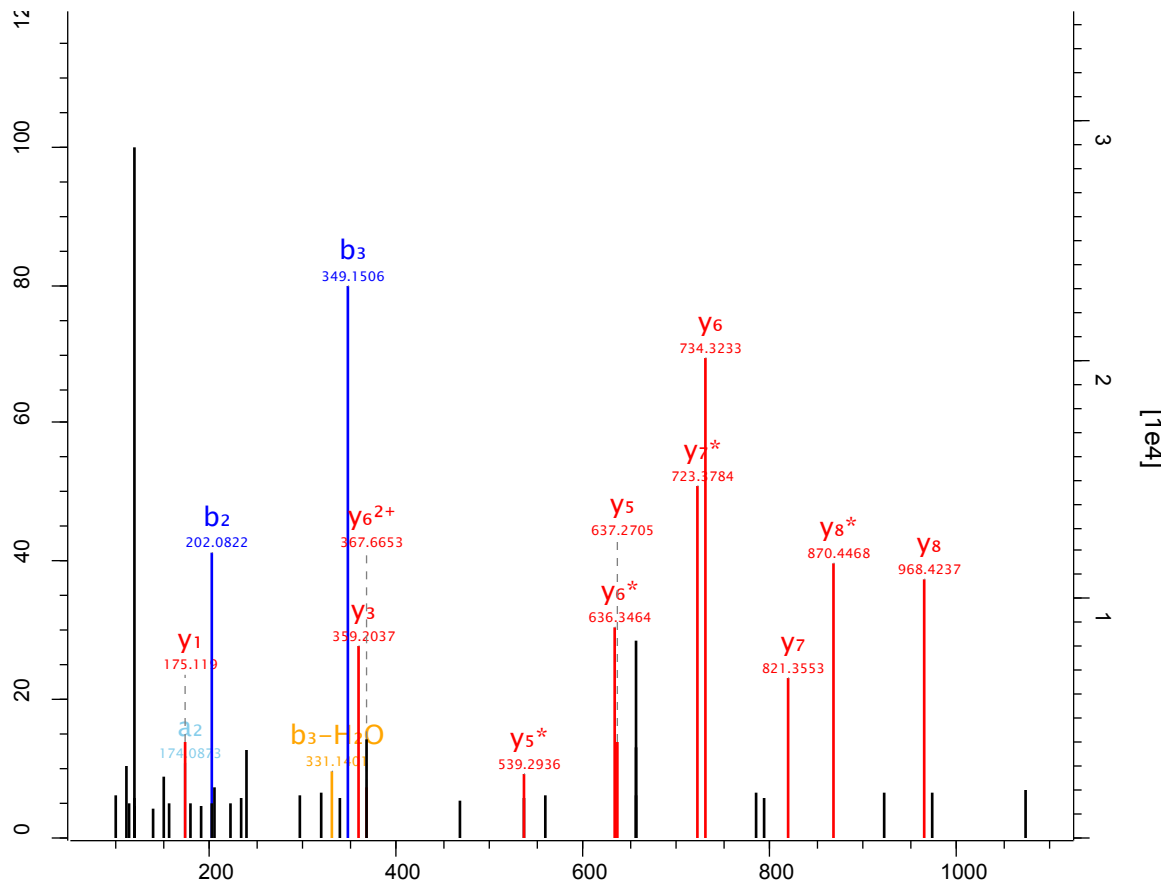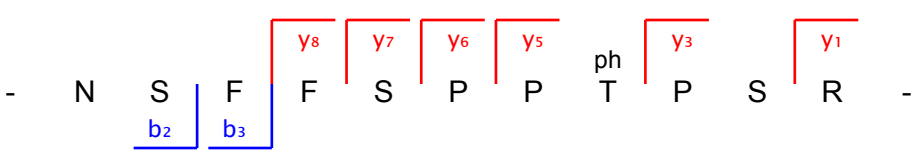

Raw file Scan Method Score m/z  
 2013\_COL15\_30\_34 19847 FTMS; HCD 51.64 763.36

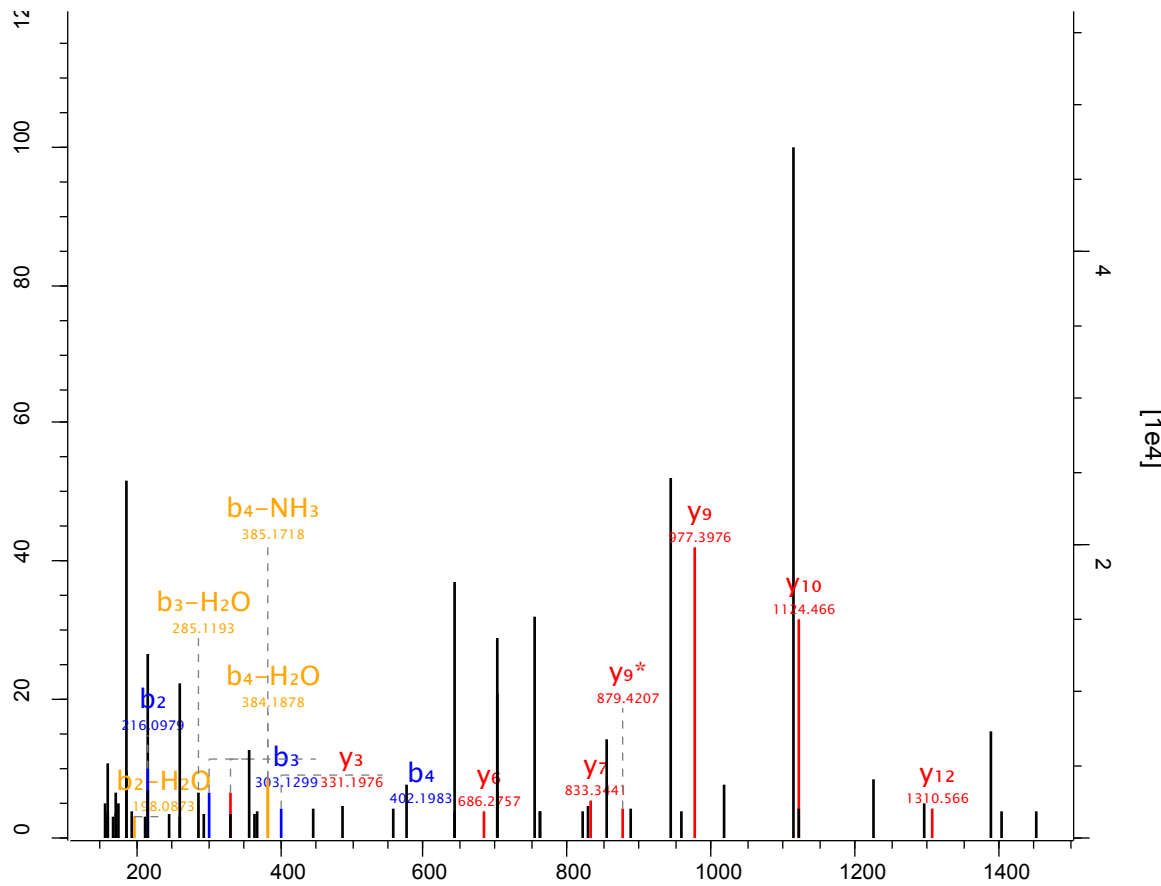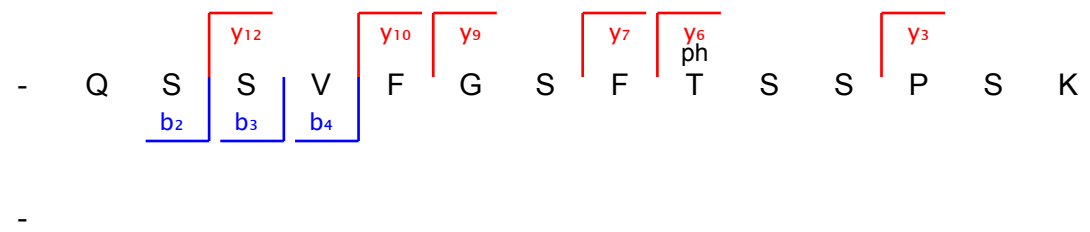

Raw file 2013\_COL15\_30\_34 Scan 2039 Method FTMS; HCD Score 83.89 m/z 529.91

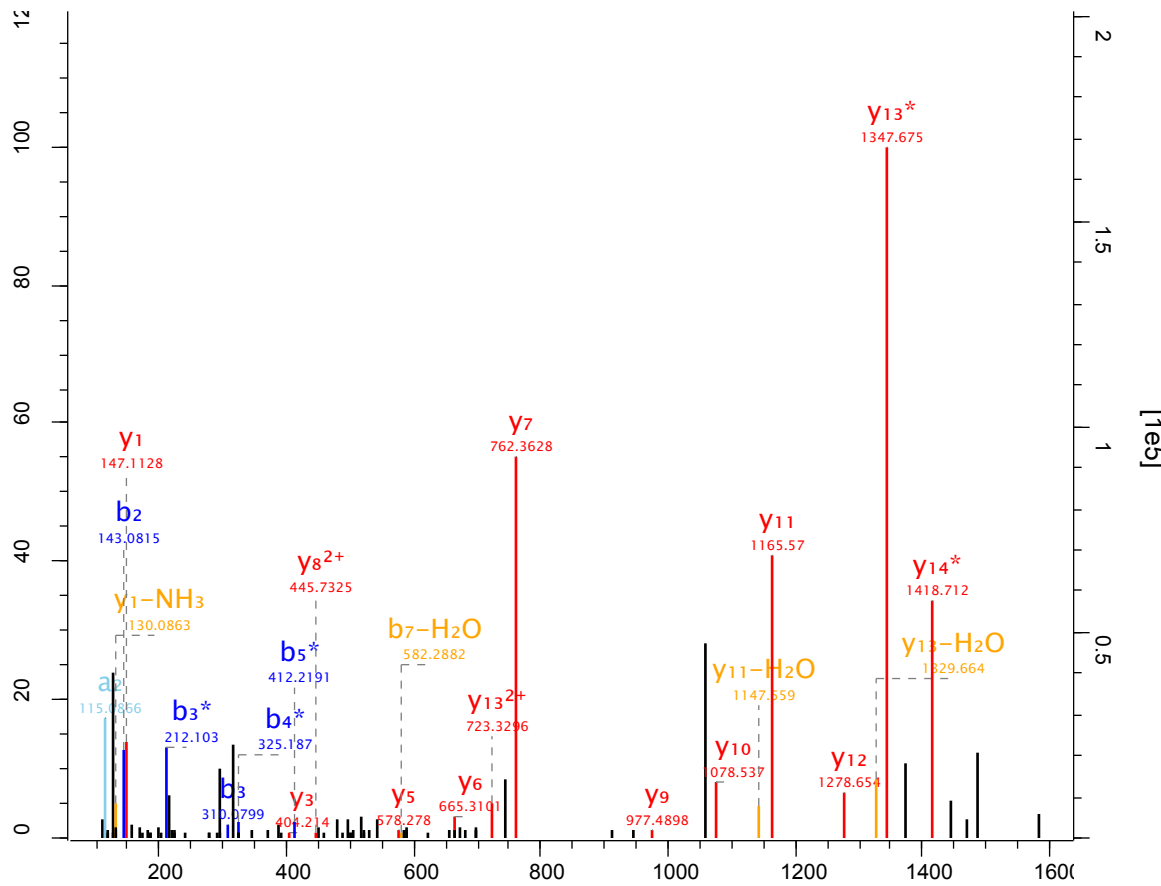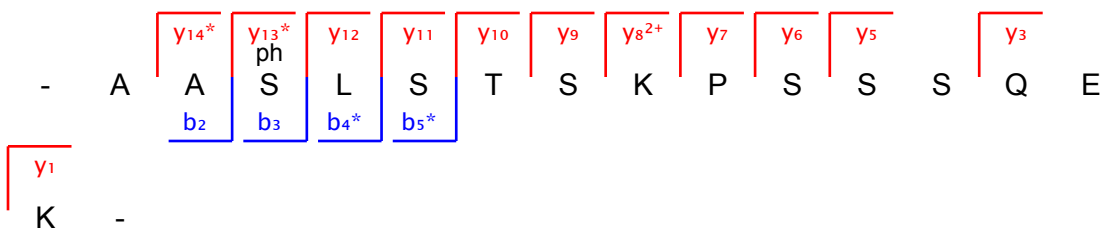

Raw file 2013\_COL15\_30\_34 Scan 20474 Method FTMS; HCD Score 96.46 m/z 871.39

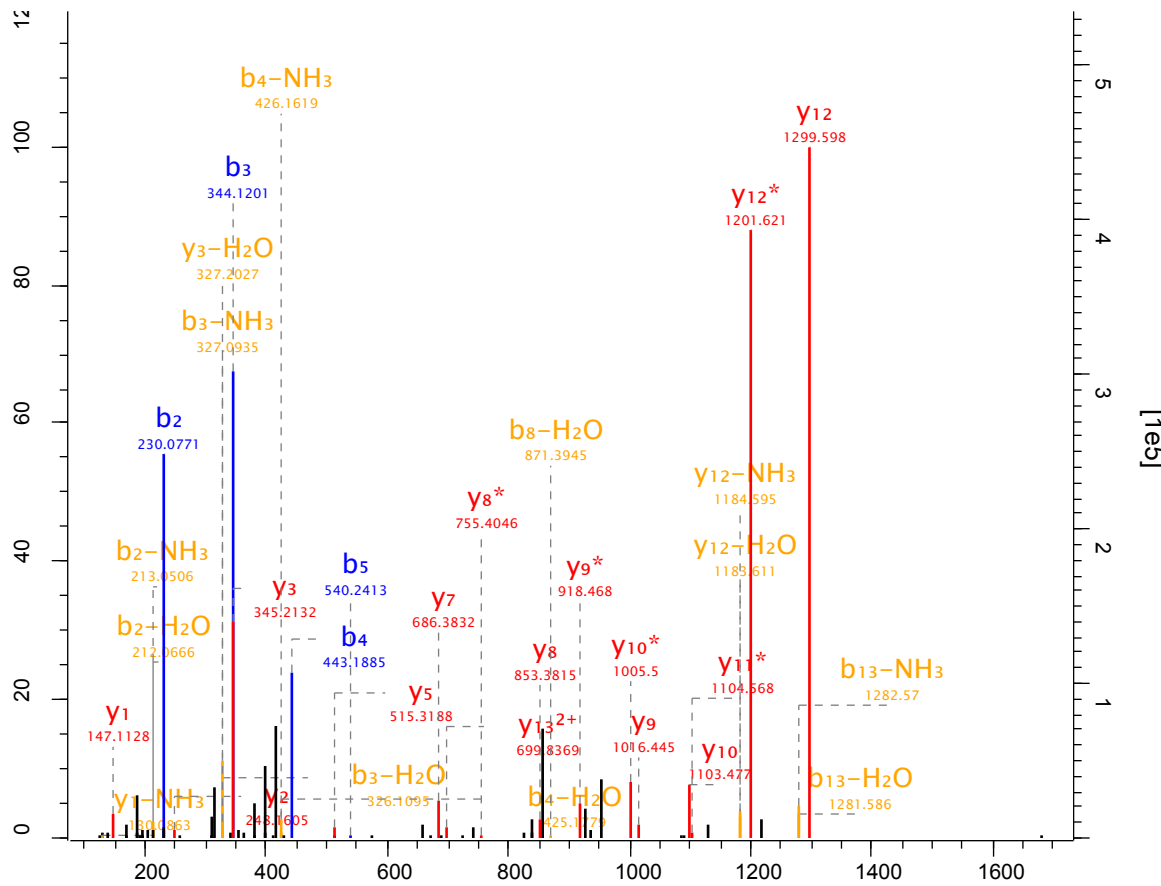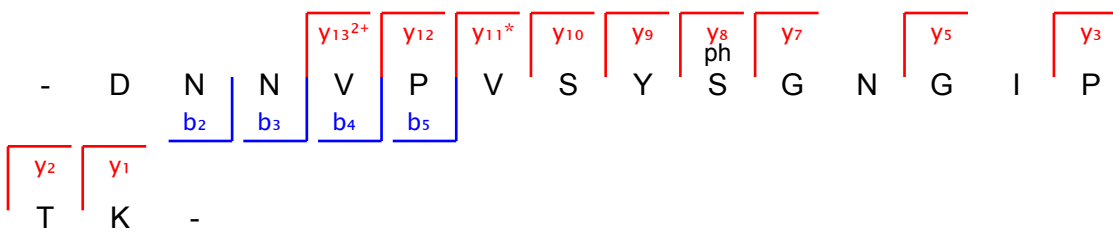

Raw file Scan Method Score m/z  
2013\_COL15\_30\_34 20477 FTMS; HCD 186.39 1016.78

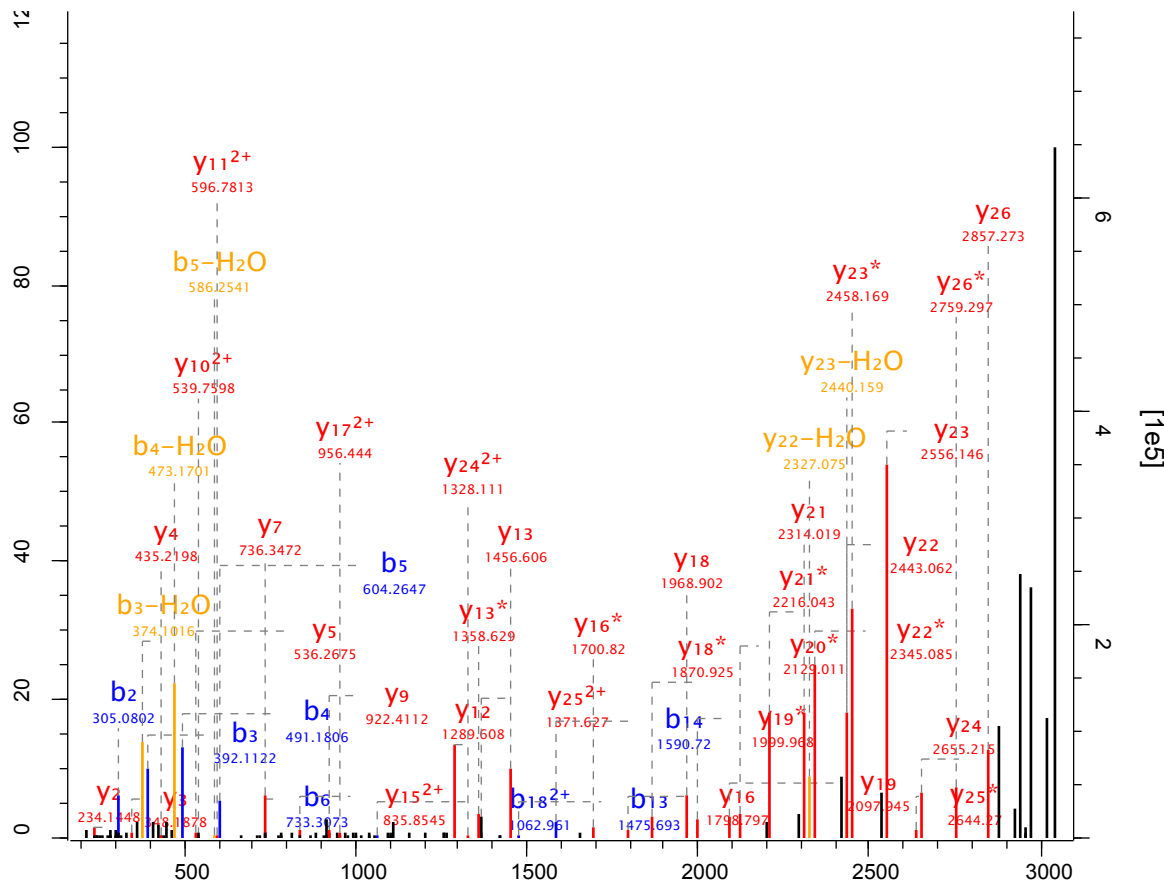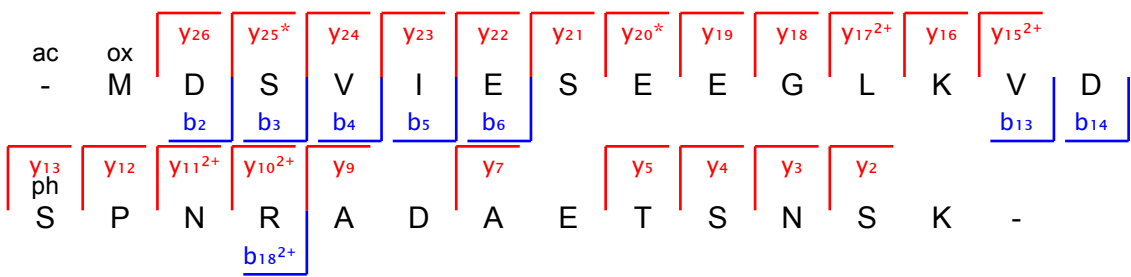

Raw file Scan Method Score m/z  
 2013\_COL15\_30\_34 20494 FTMS; HCD 94.49 648.81

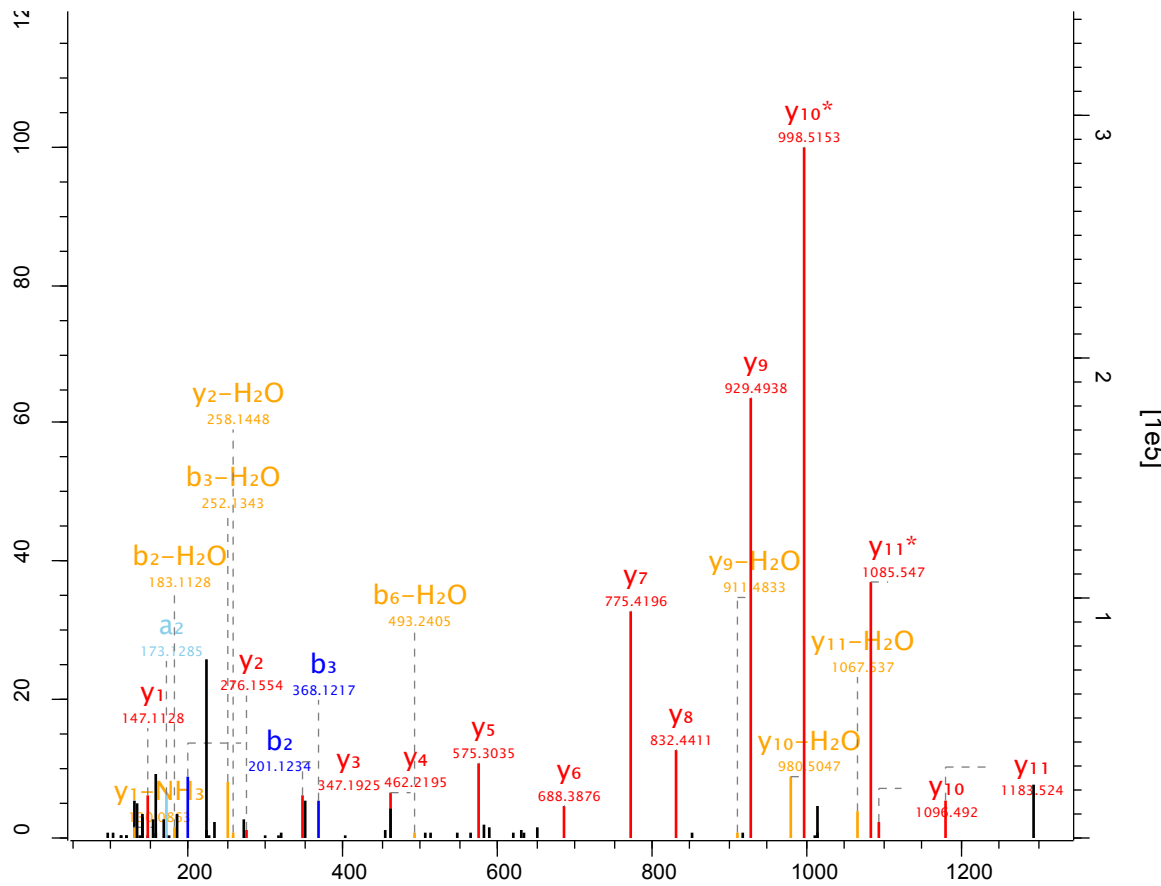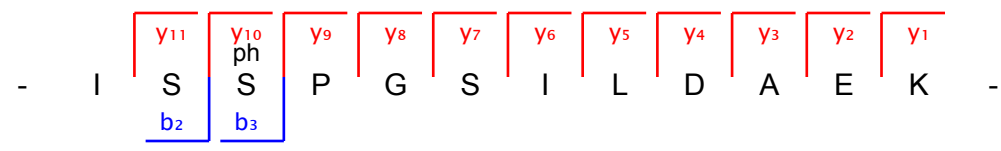

| Raw file         | Scan | Method    | Score | m/z   |
|------------------|------|-----------|-------|-------|
| 2013_COL15_30_34 | 2073 | FTMS; HCD | 89.46 | 621.3 |

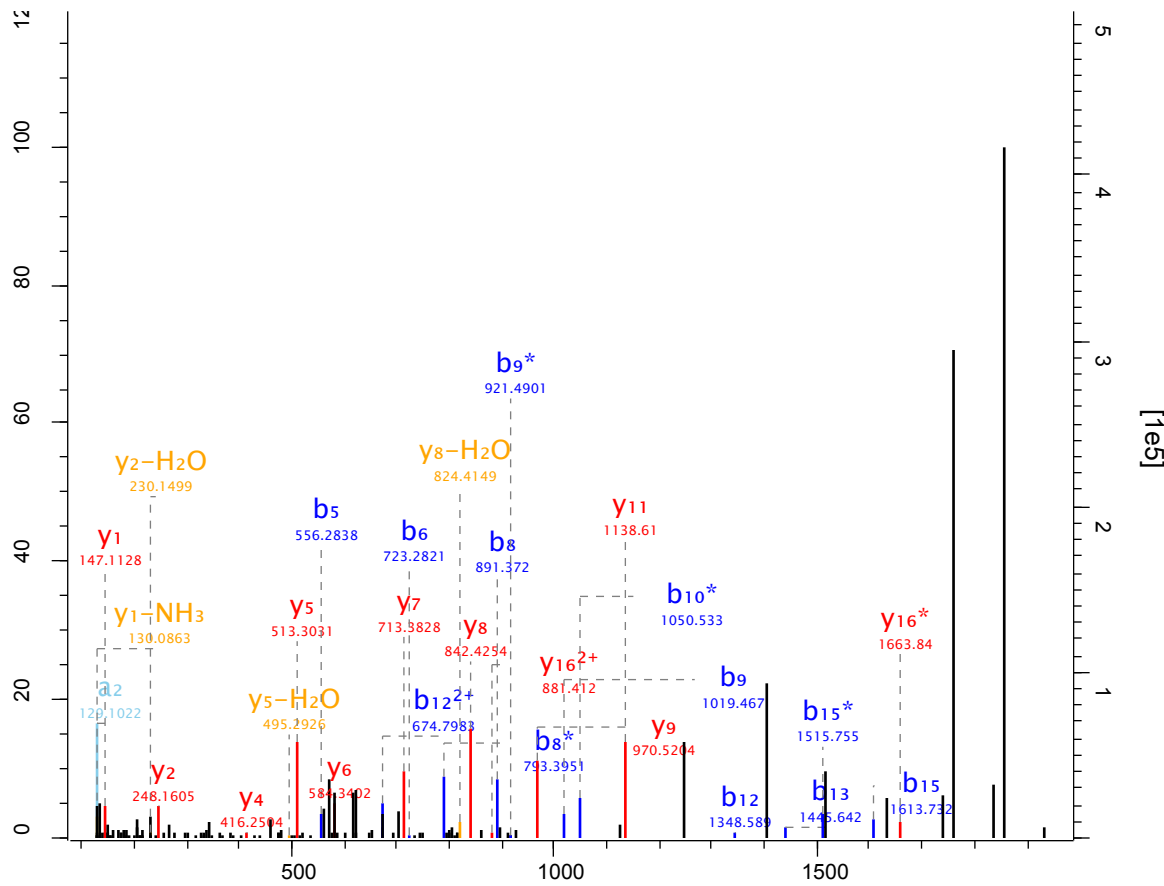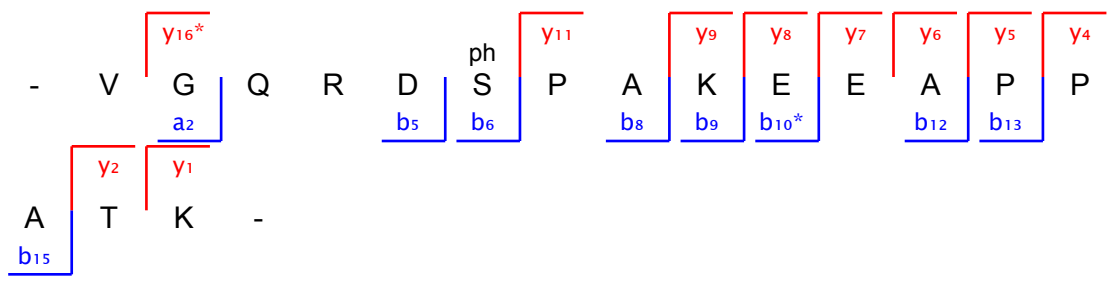

Raw file Scan Method Score m/z  
 2013\_COL15\_30\_34 21063 FTMS; HCD 84.86 727.36

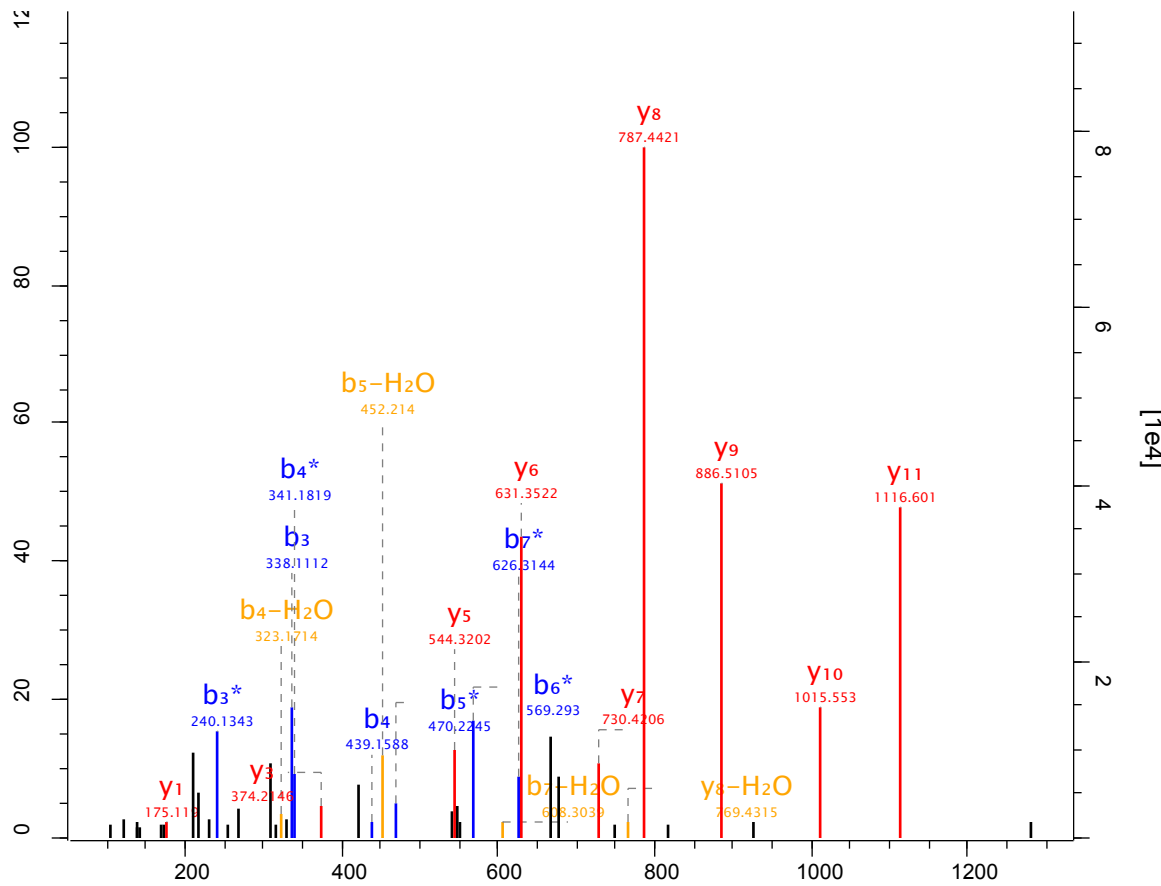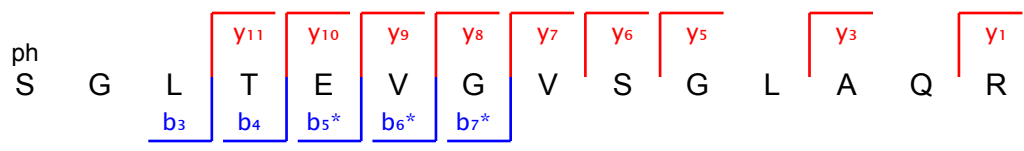



Raw file Scan Method Score m/z  
 2013\_COL15\_30\_34 2147 FTMS; HCD 40.98 460.21

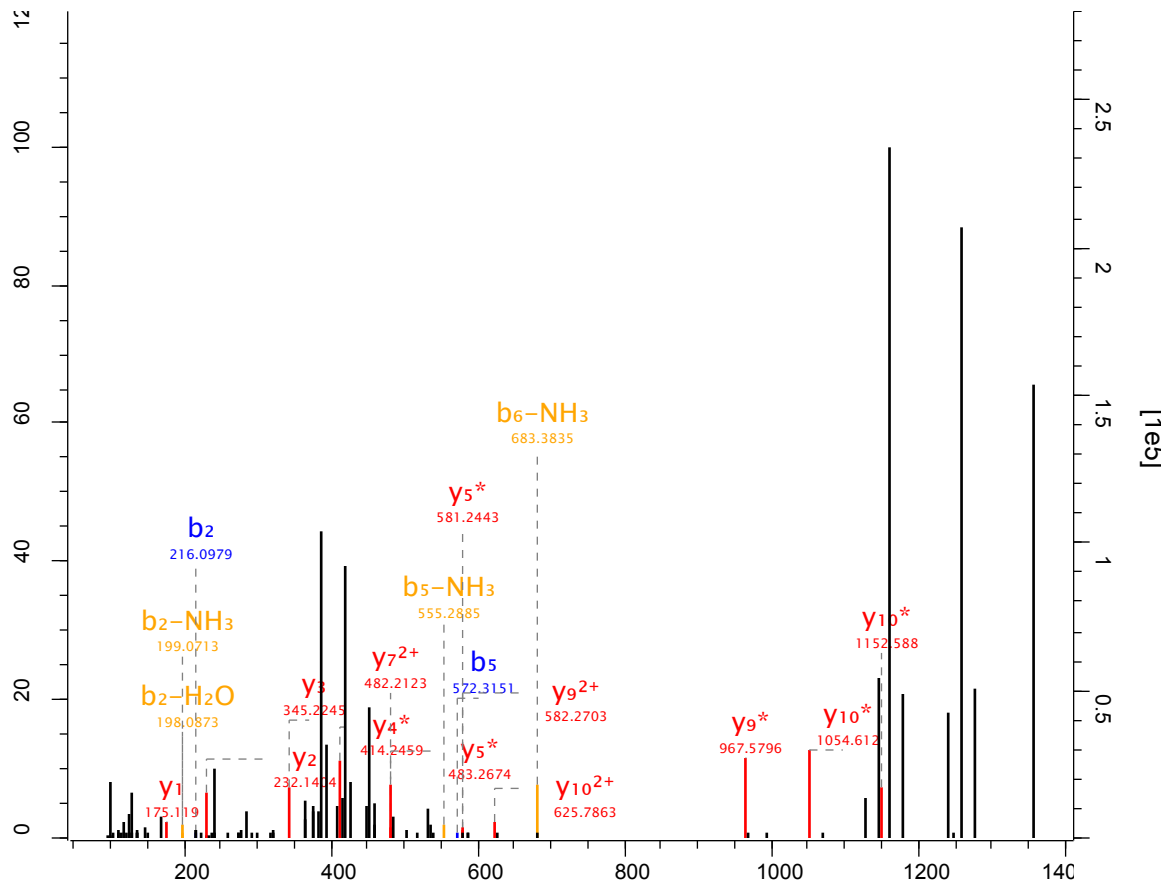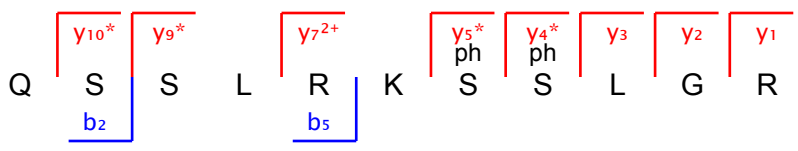

| Raw file         | Scan  | Method    | Score | m/z    |
|------------------|-------|-----------|-------|--------|
| 2013_COL15_30_34 | 21562 | FTMS; HCD | 50.8  | 395.17 |

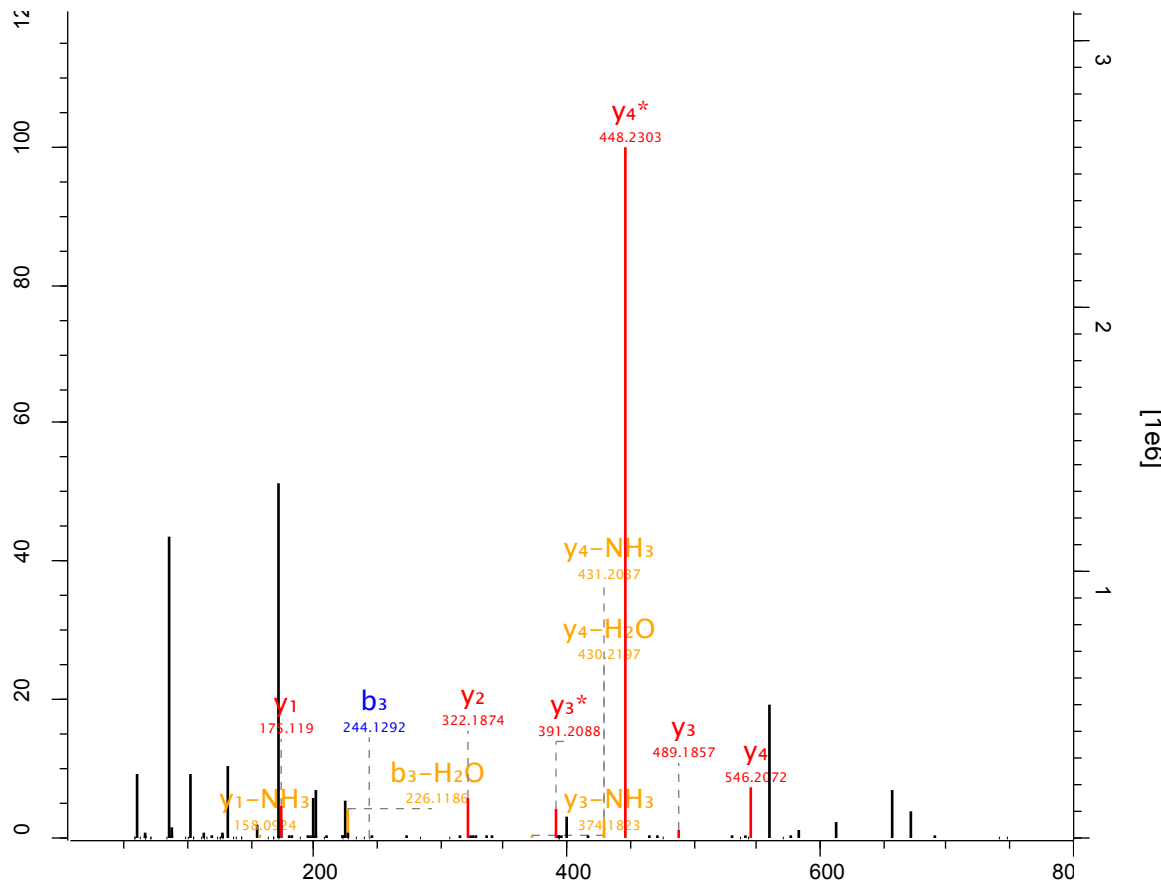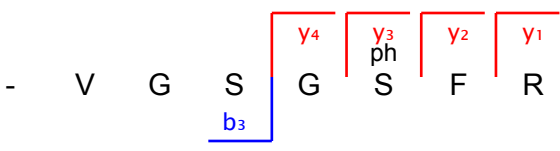

Raw file Scan Method Score m/z  
 2013\_COL15\_30\_34 21569 FTMS; HCD 224.4 826.8

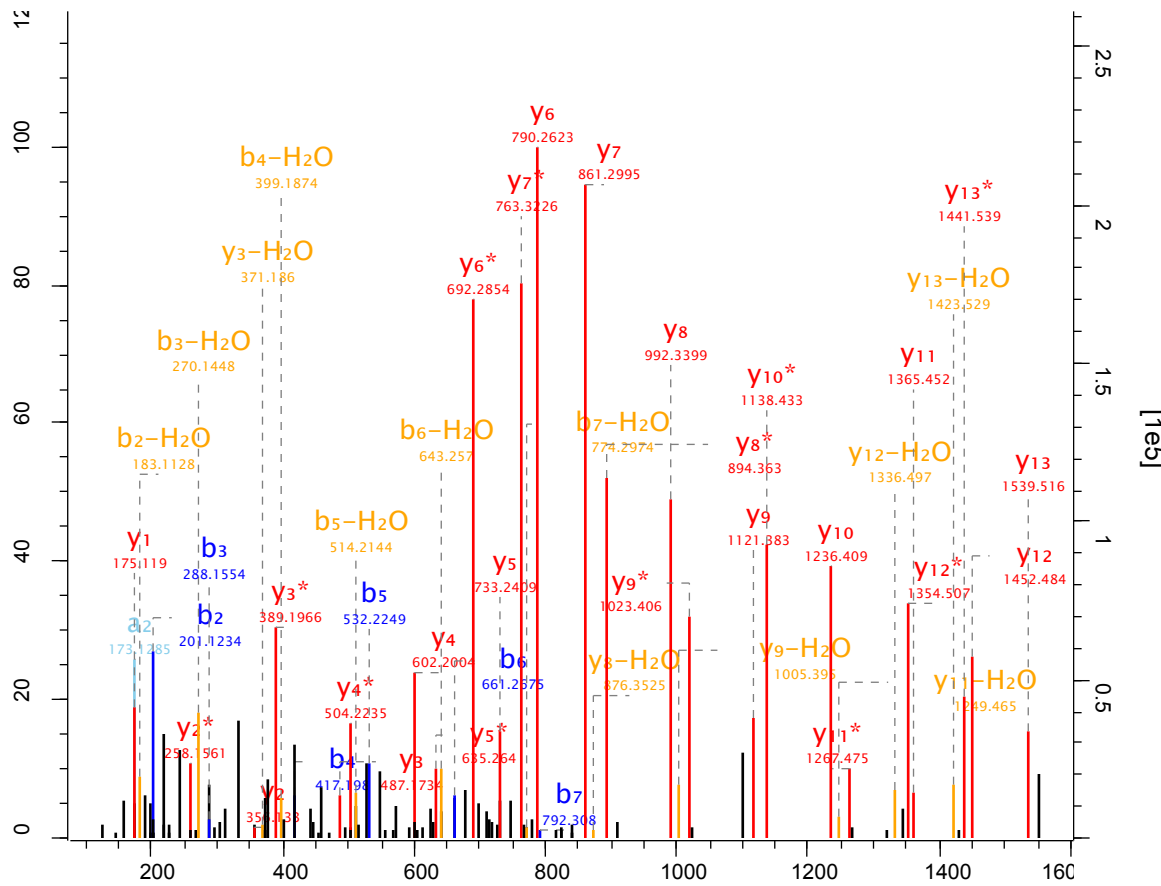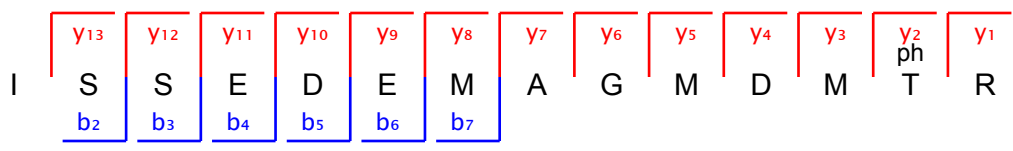

Raw file Scan Method Score m/z  
 2013\_COL15\_30\_34 21916 FTMS; HCD 156.08 855.36

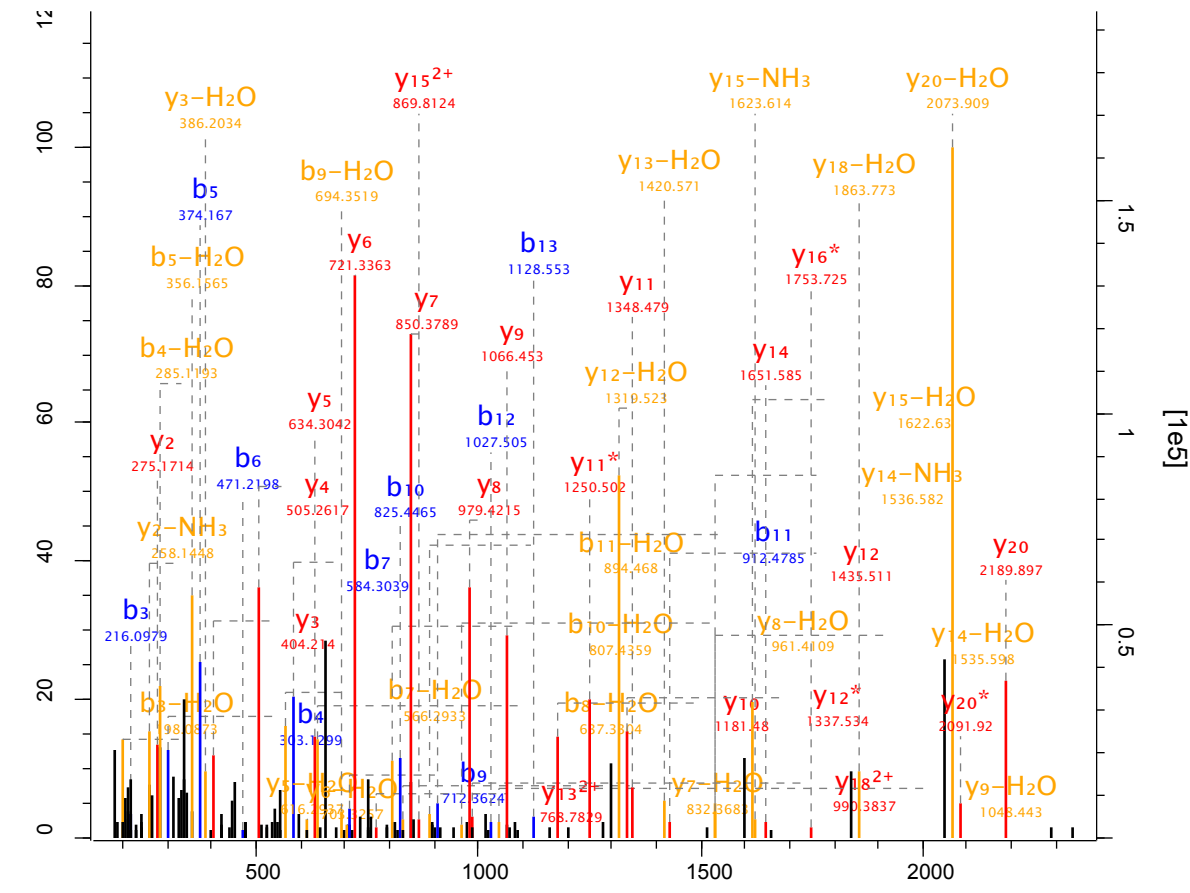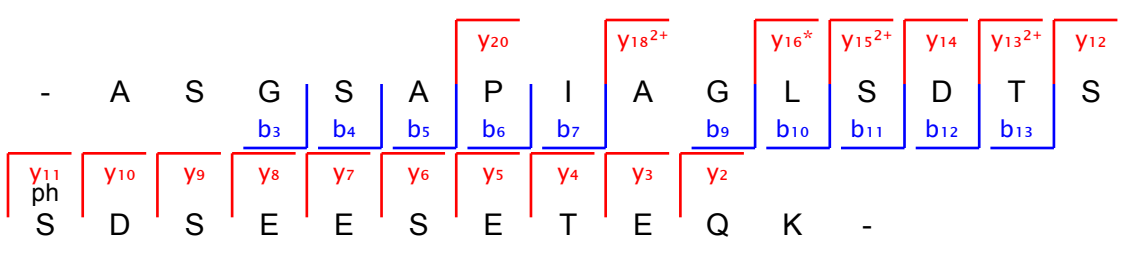

Raw file Scan Method Score m/z  
 2013\_COL15\_30\_34 21943 FTMS; HCD 89.99 696.29

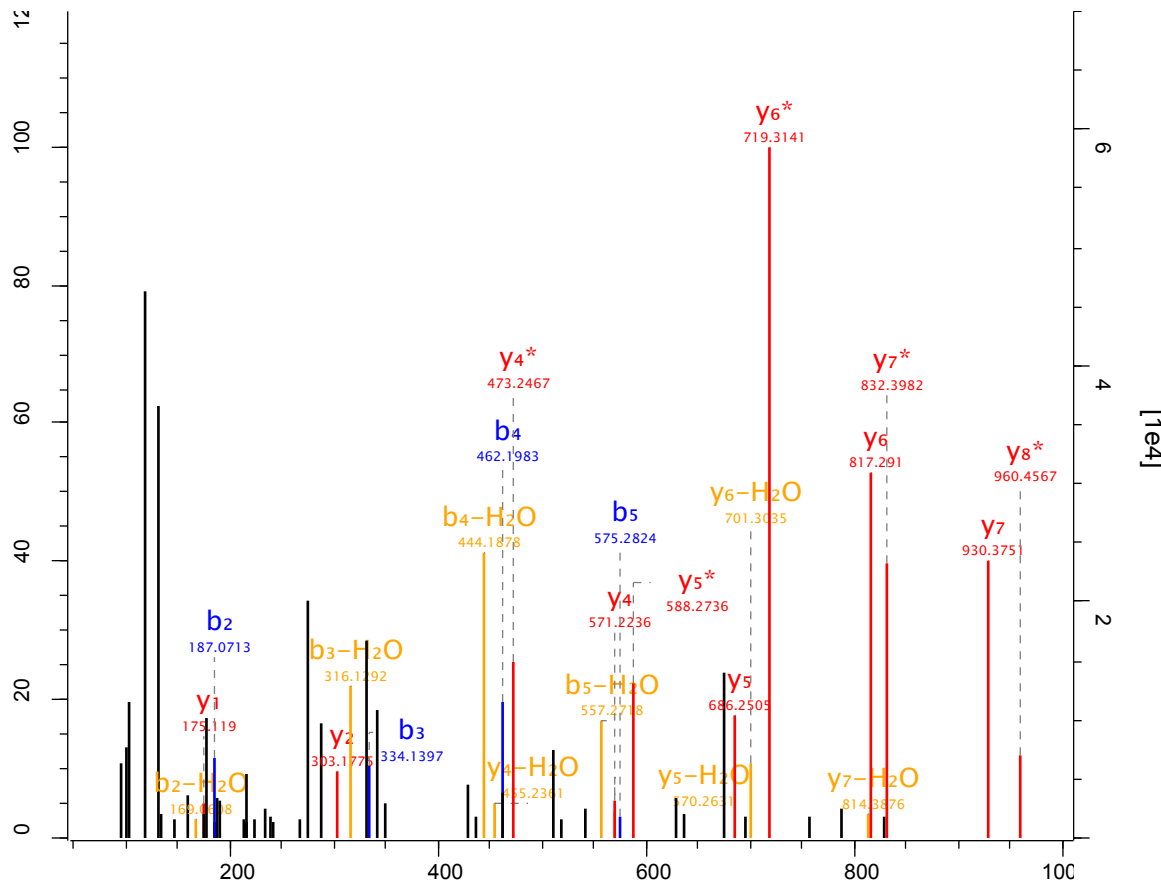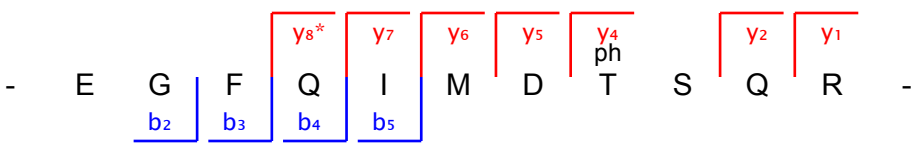

Raw file Scan Method Score m/z  
 2013\_COL15\_30\_34 21958 FTMS; HCD 106.75 857.38

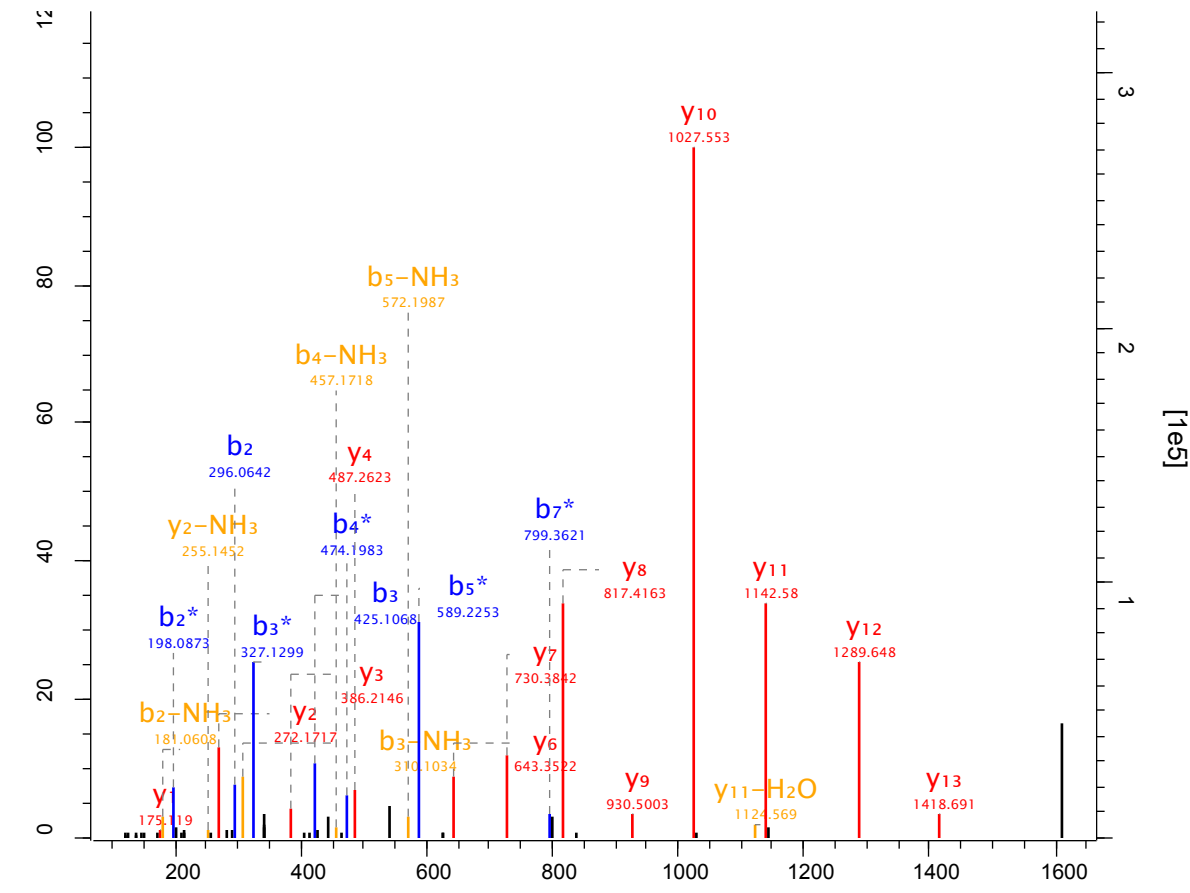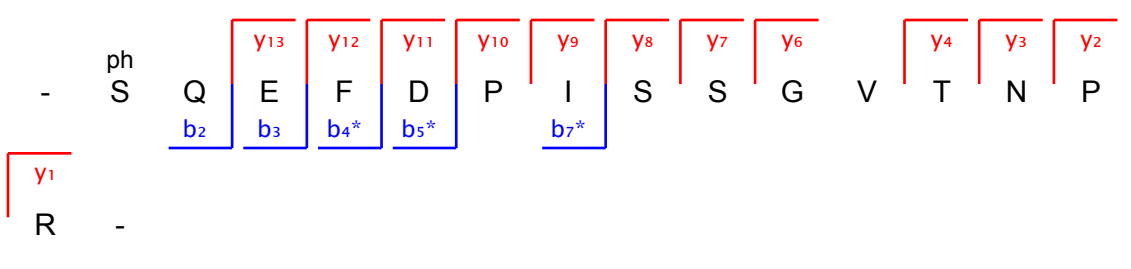

Raw file Scan Method Score m/z  
 2013\_COL15\_30\_34 22029 FTMS; HCD 42.38 692.68

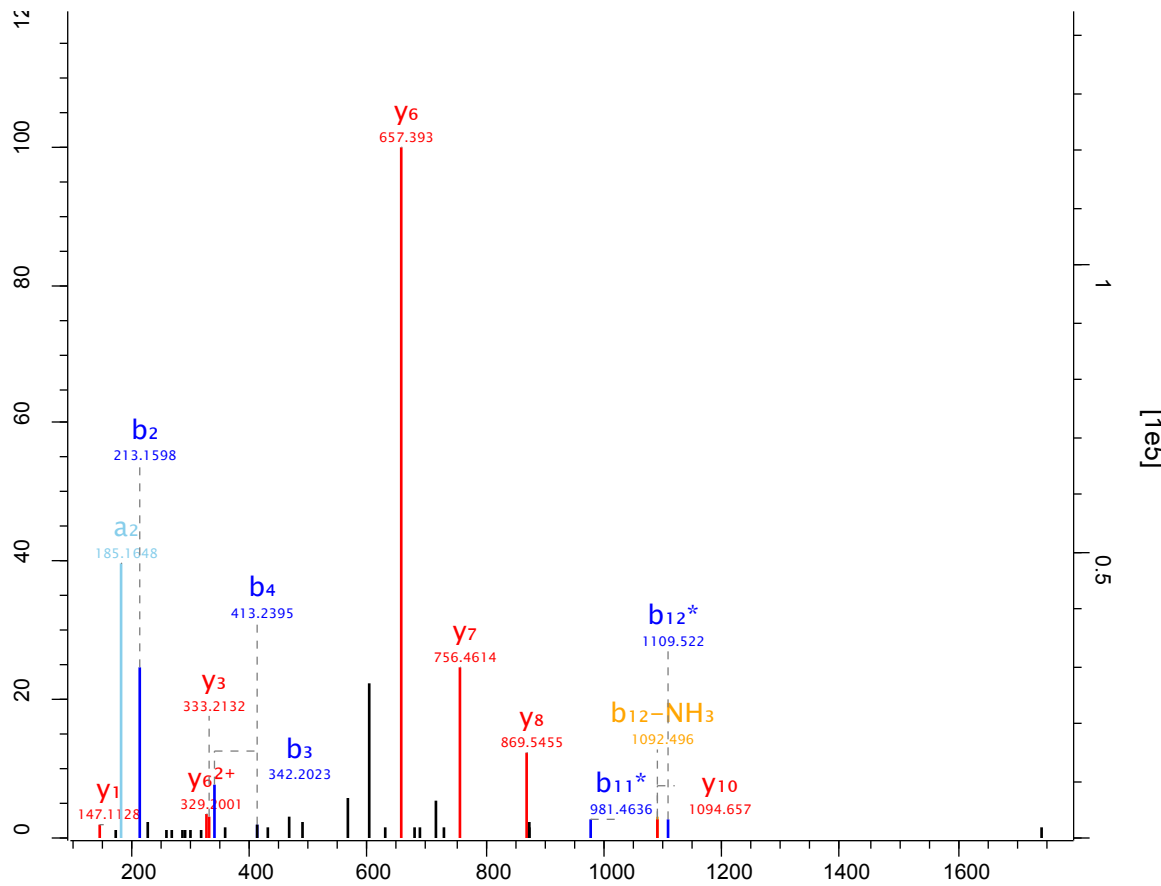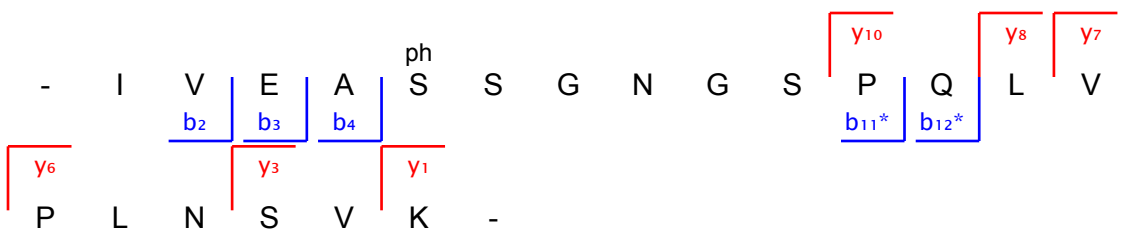

Raw file 2013\_COL15\_30\_34 Scan 22057 Method FTMS; HCD Score 55.59 m/z 866.38

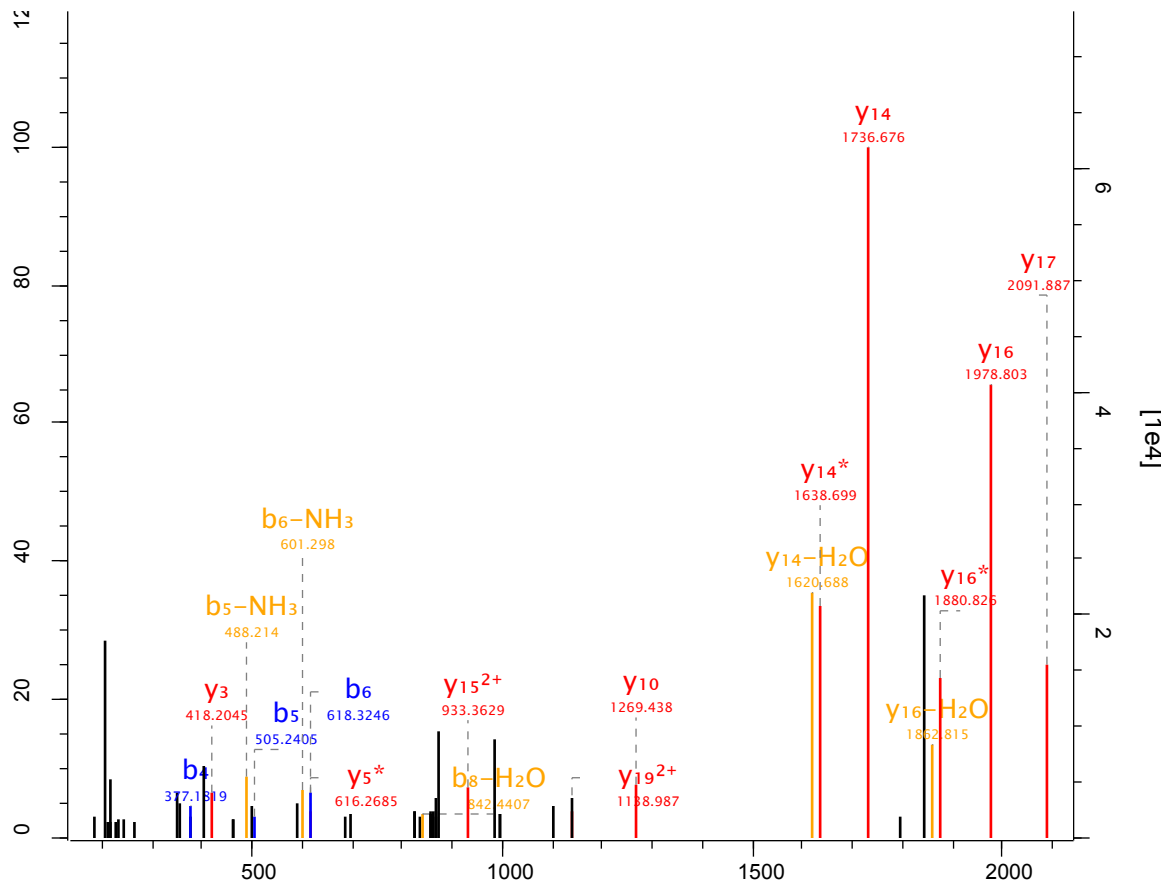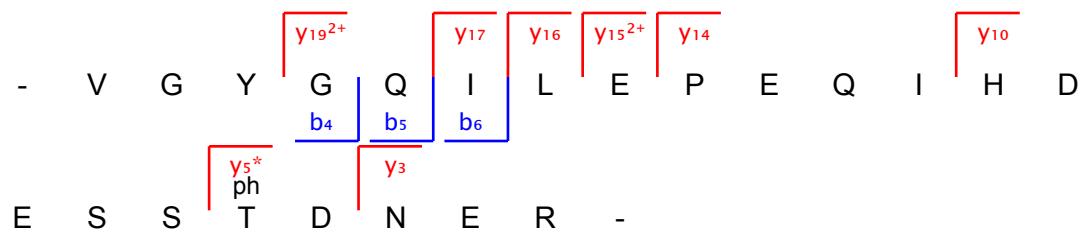





Raw file: 2013\_COL15\_30\_34 Scan: 22190 Method: FTMS; HCD Score: 229.39 m/z: 725.65

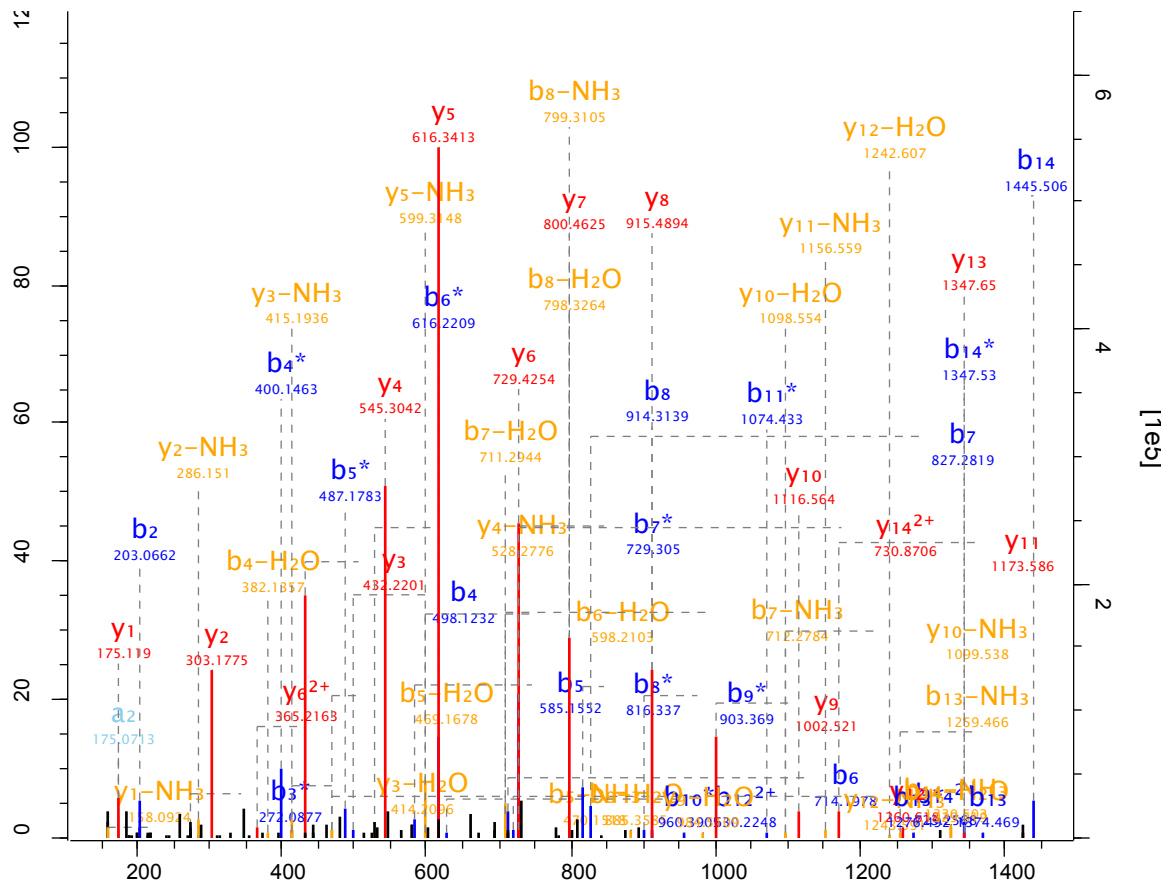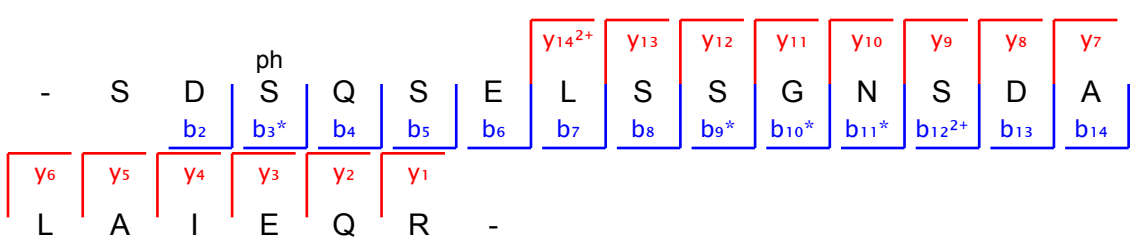

Raw file Scan Method Score m/z  
 2013\_COL15\_30\_34 22544 FTMS; HCD 105.71 908.43

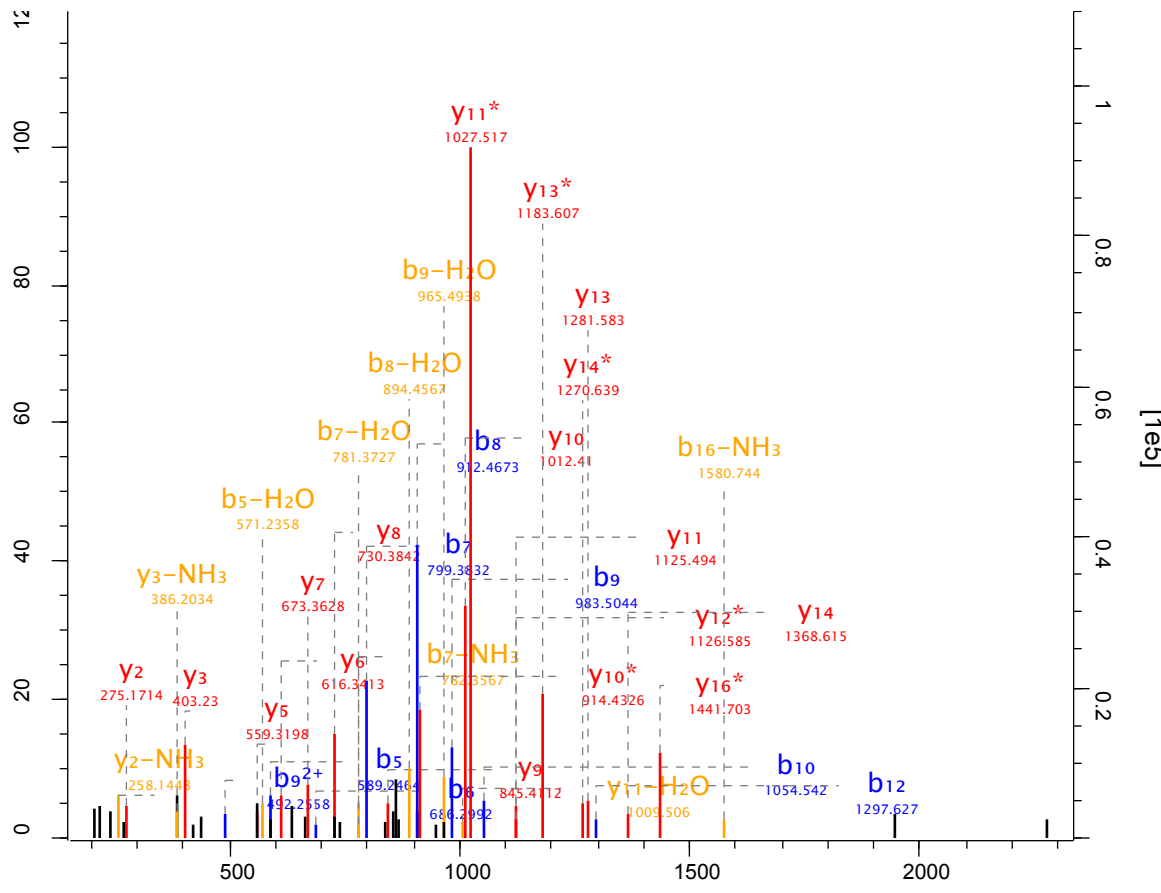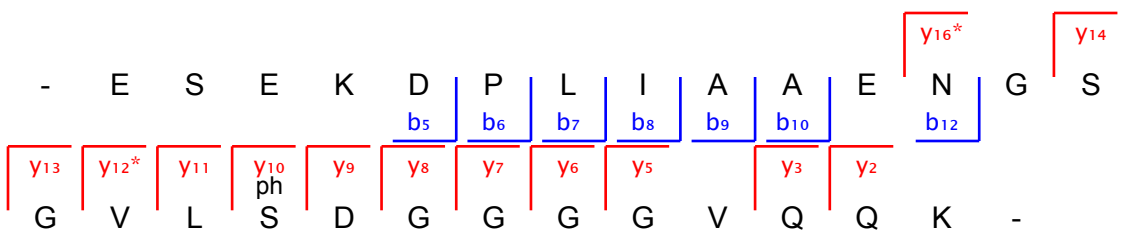

Raw file Scan Method Score m/z  
 2013\_COL15\_30\_34 22547 FTMS; HCD 101.75 867.04

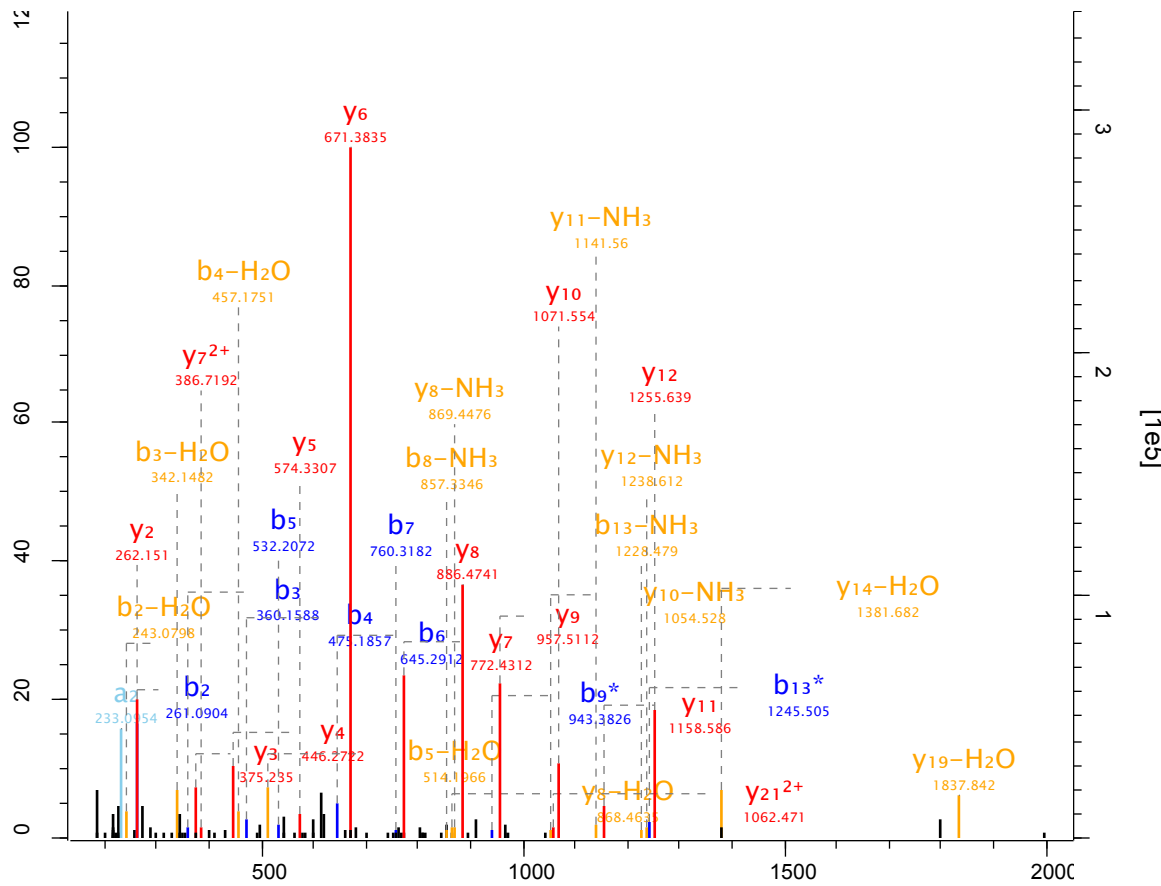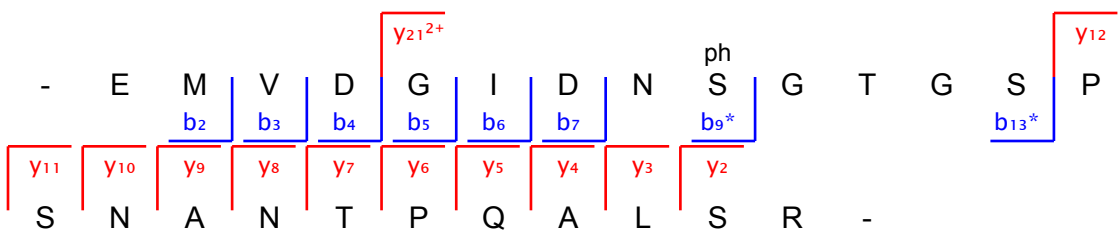

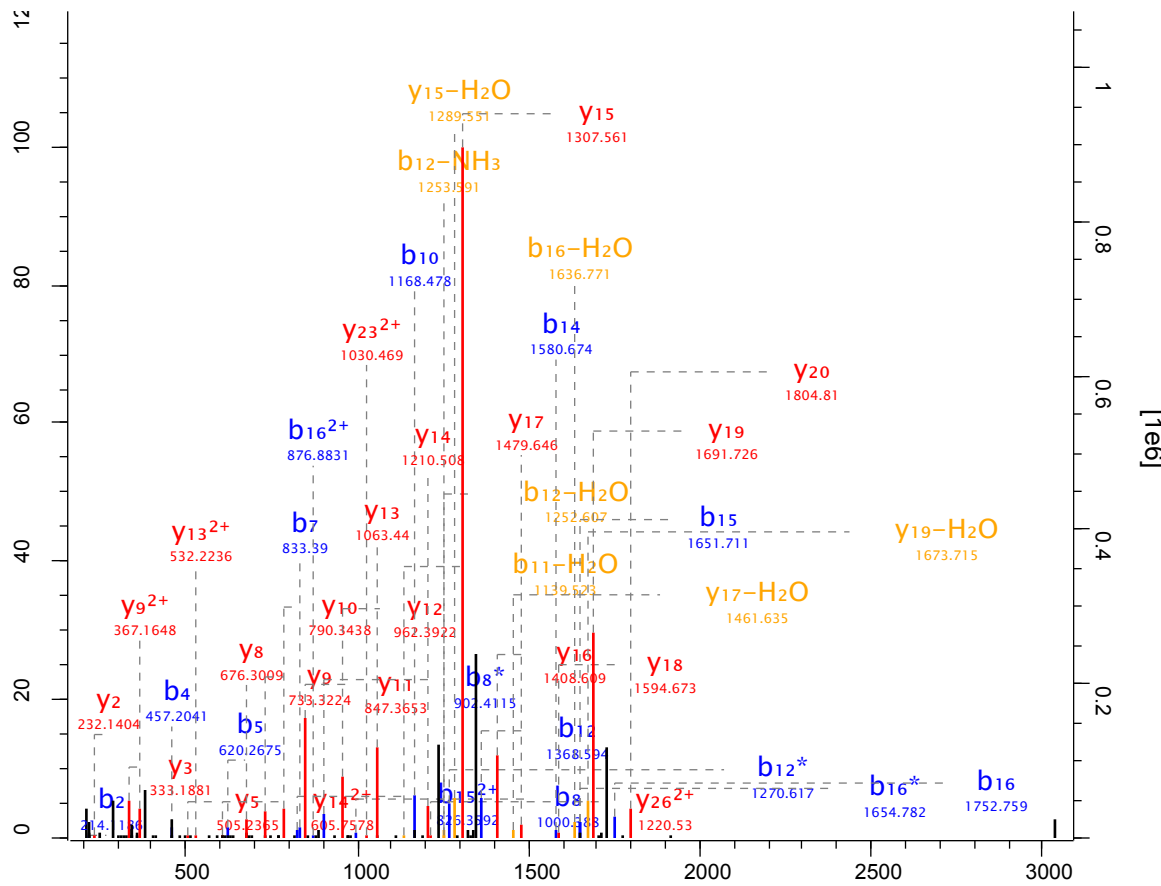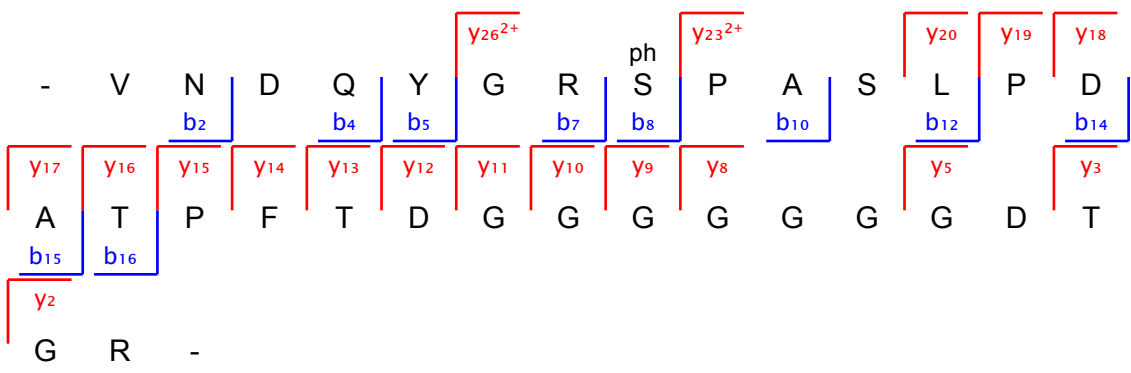

Raw file 2013\_COL15\_30\_34 Scan 22917 Method FTMS; HCD Score 135.47 m/z 745.33

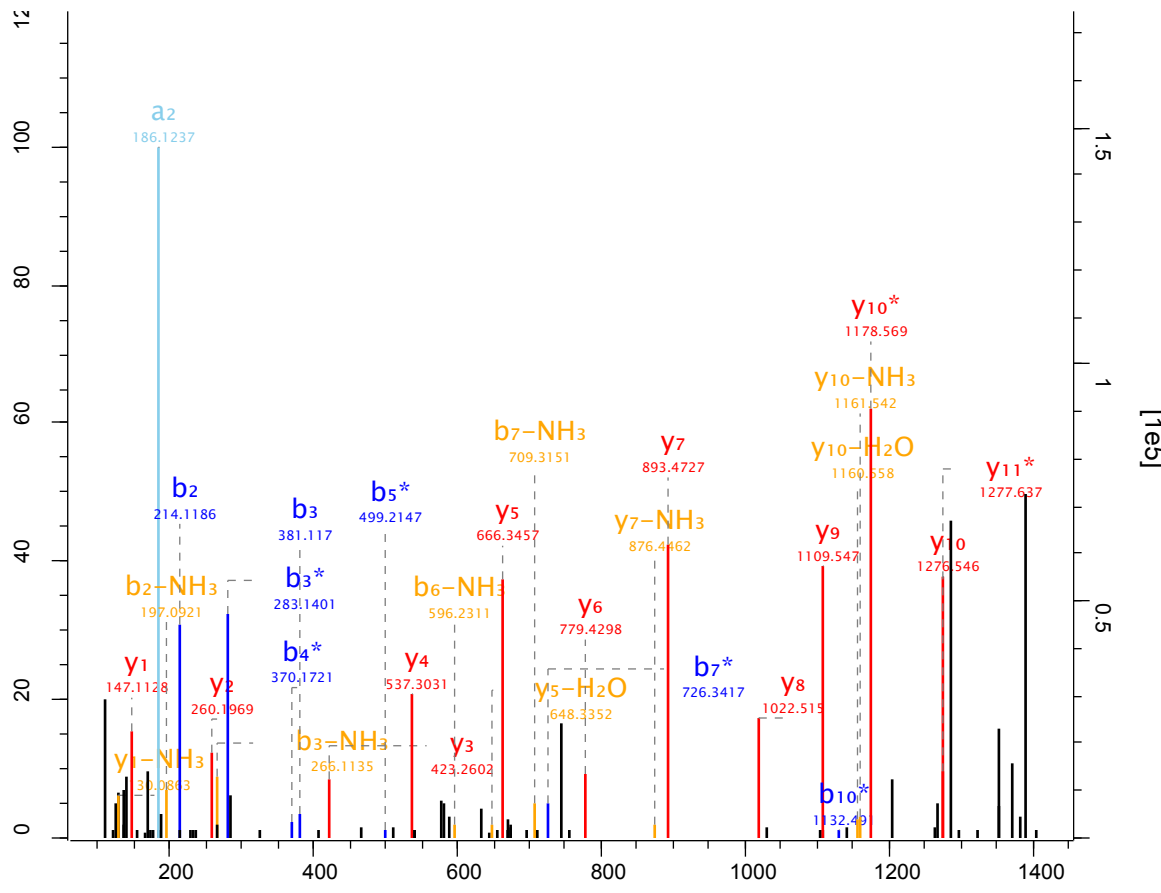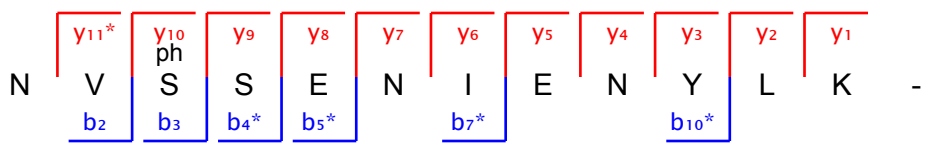

Raw file Scan Method Score m/z  
 2013\_COL15\_30\_34 23213 FTMS; HCD 104.53 1054.44

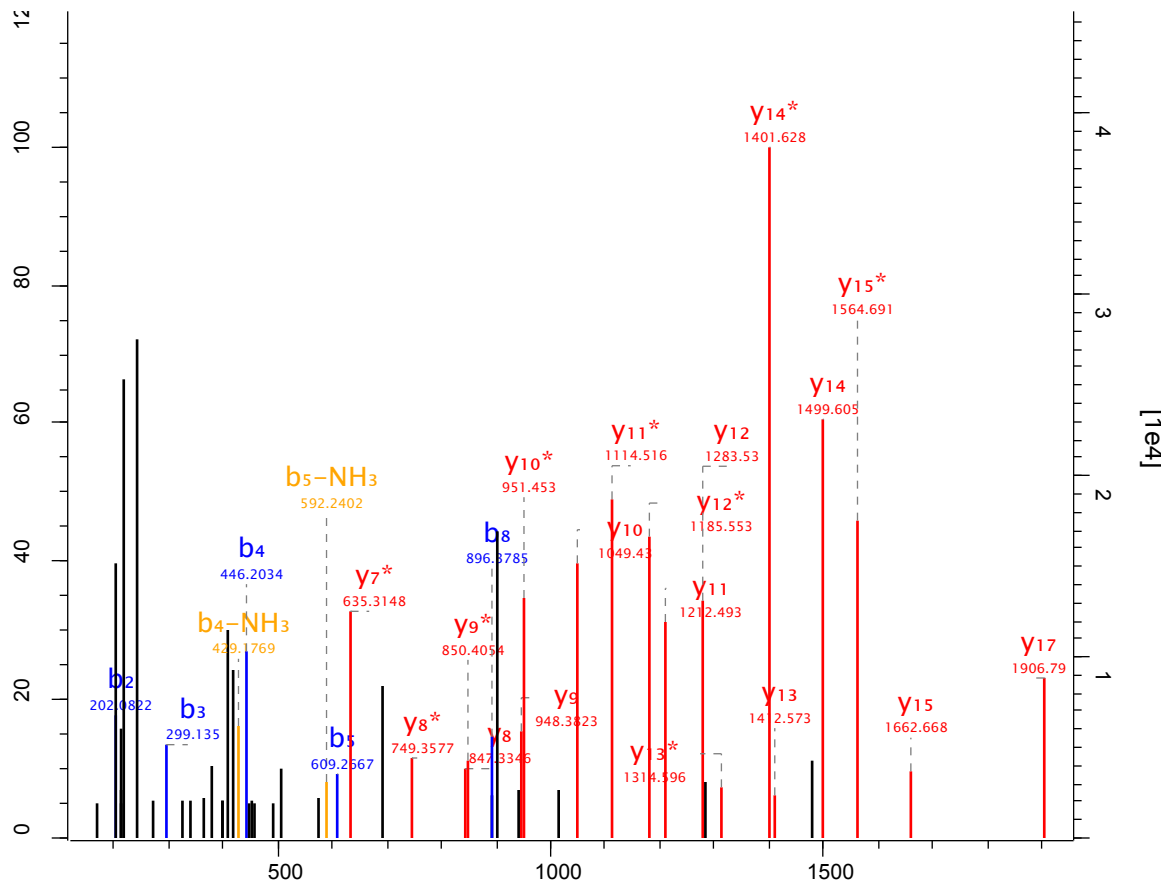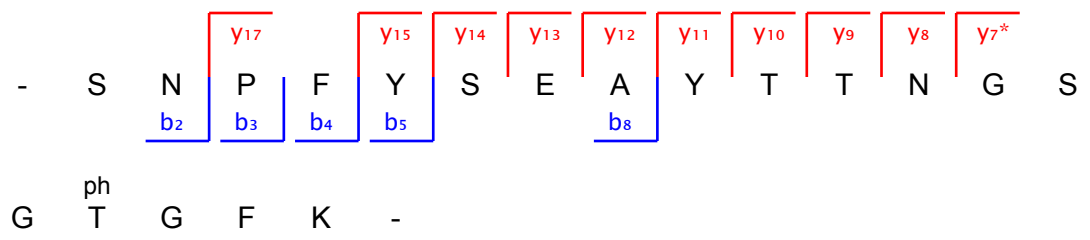

Raw file

Scan

Method

Score

m/z

2013\_COL15\_30\_34

2327

FTMS; HCD

72.66

515.2

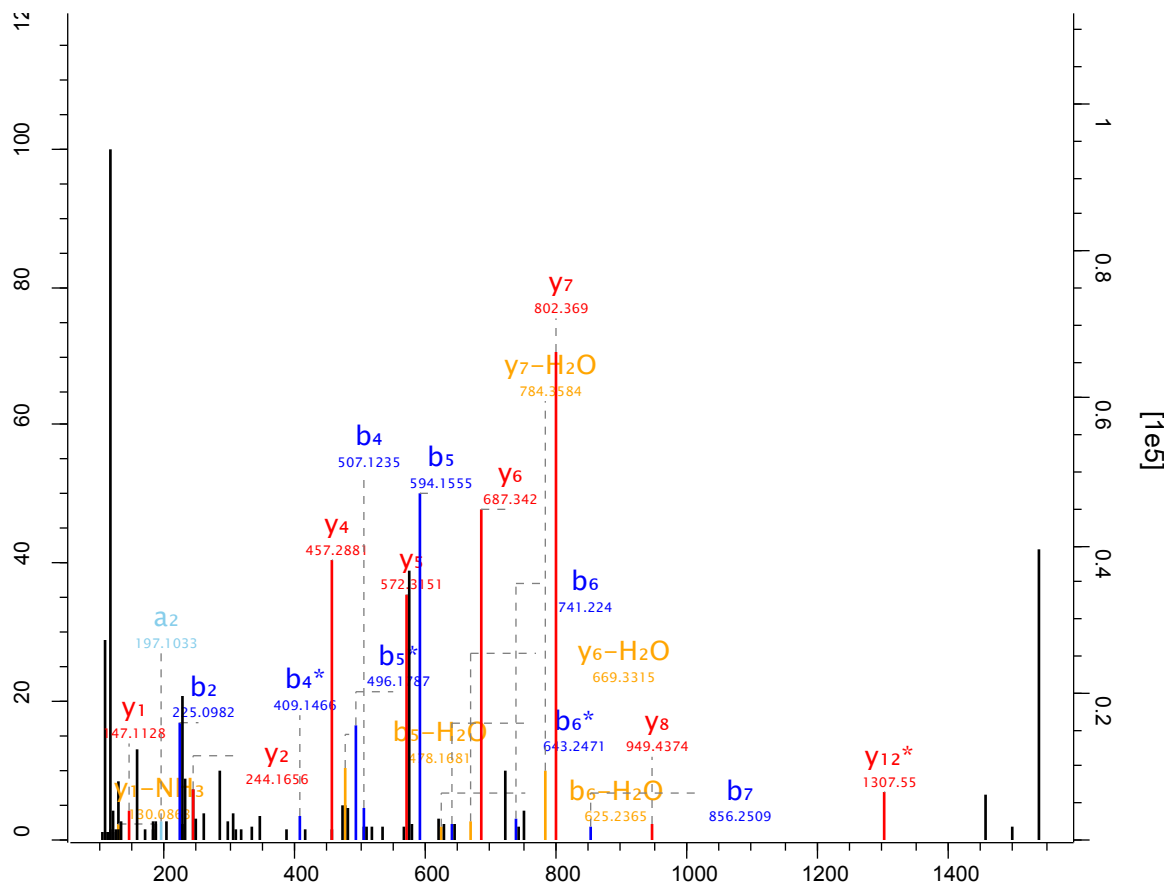

- H S S D S F D D D G R P K -

ph

y<sub>12</sub>\* b<sub>2</sub> b<sub>4</sub> b<sub>5</sub> b<sub>6</sub> b<sub>7</sub> y<sub>8</sub> y<sub>7</sub> y<sub>6</sub> y<sub>5</sub> y<sub>4</sub> y<sub>2</sub> y<sub>1</sub>



Raw file Scan Method Score m/z  
 2013\_COL15\_30\_34 23271 FTMS; HCD 101.41 729.03

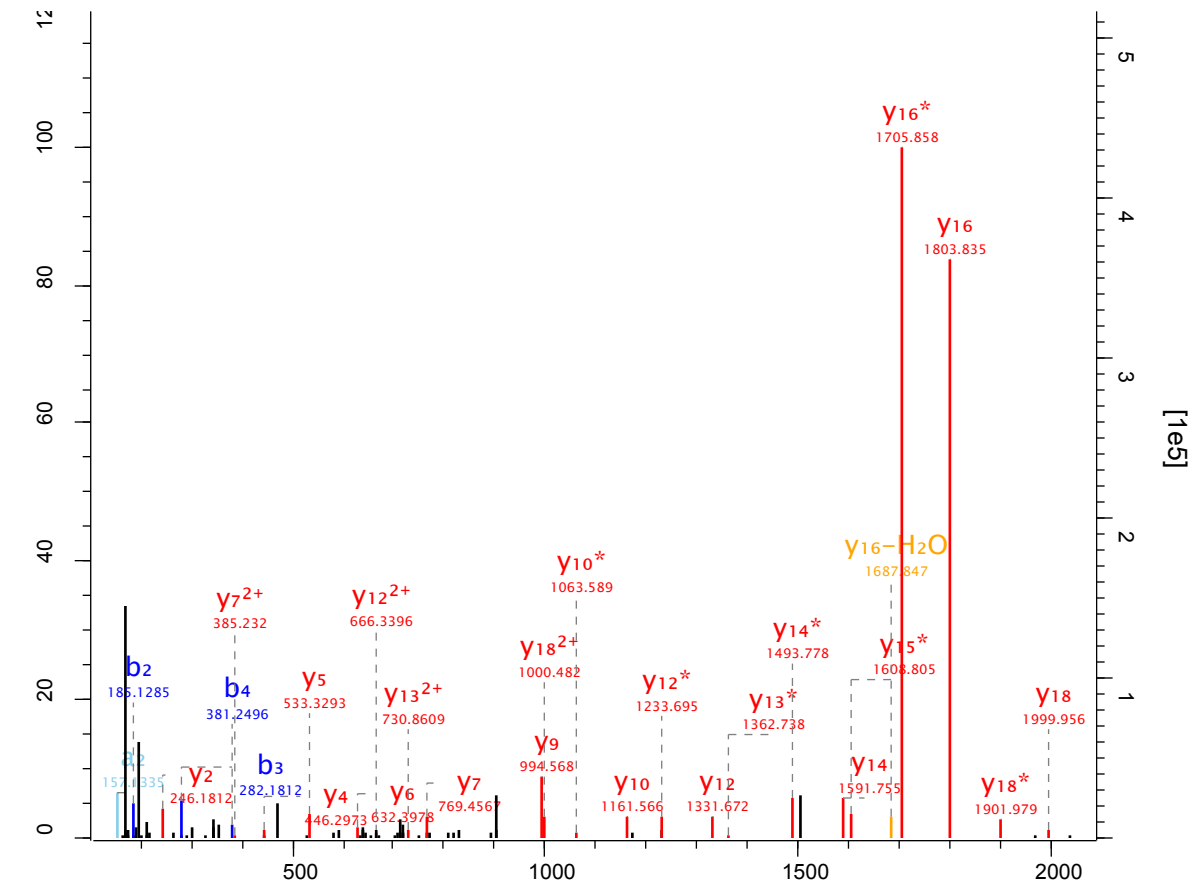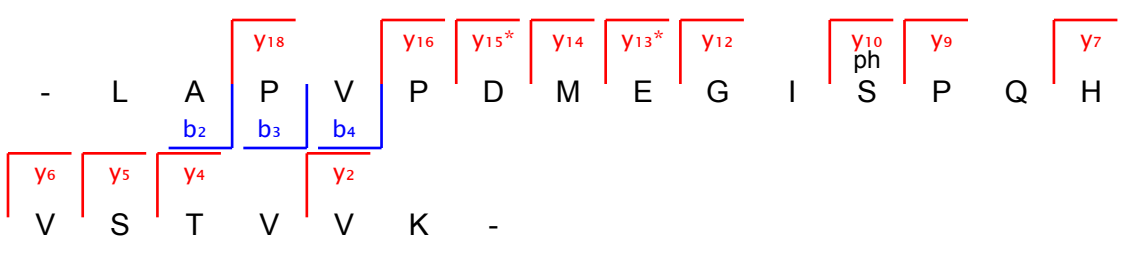

Raw file Scan Method Score m/z  
 2013\_COL15\_30\_34 23839 FTMS; HCD 179.8 706.31

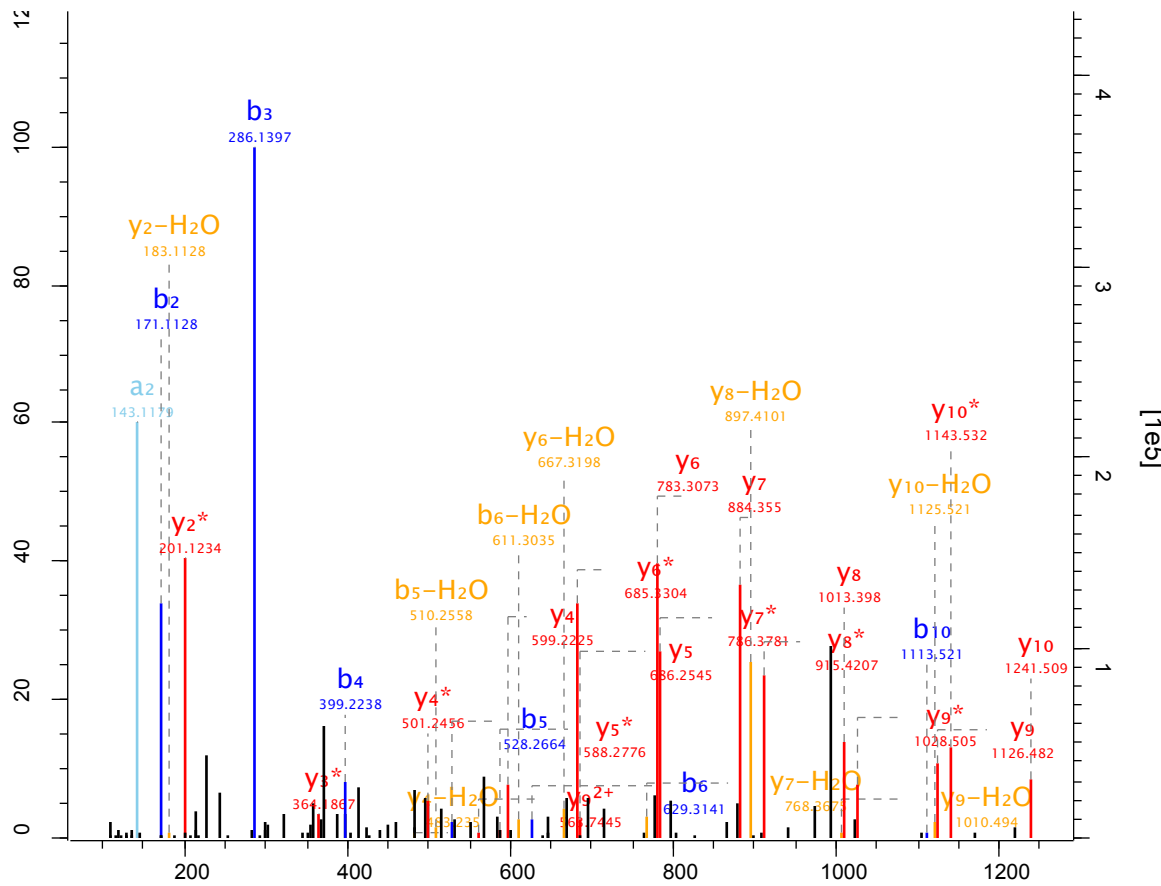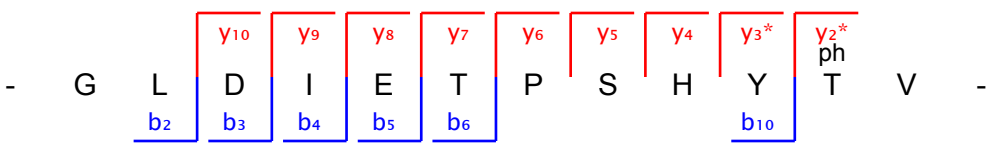

| Raw file         | Scan  | Method    | Score | m/z    |
|------------------|-------|-----------|-------|--------|
| 2013_COL15_30_34 | 23954 | FTMS; HCD | 92.86 | 578.23 |

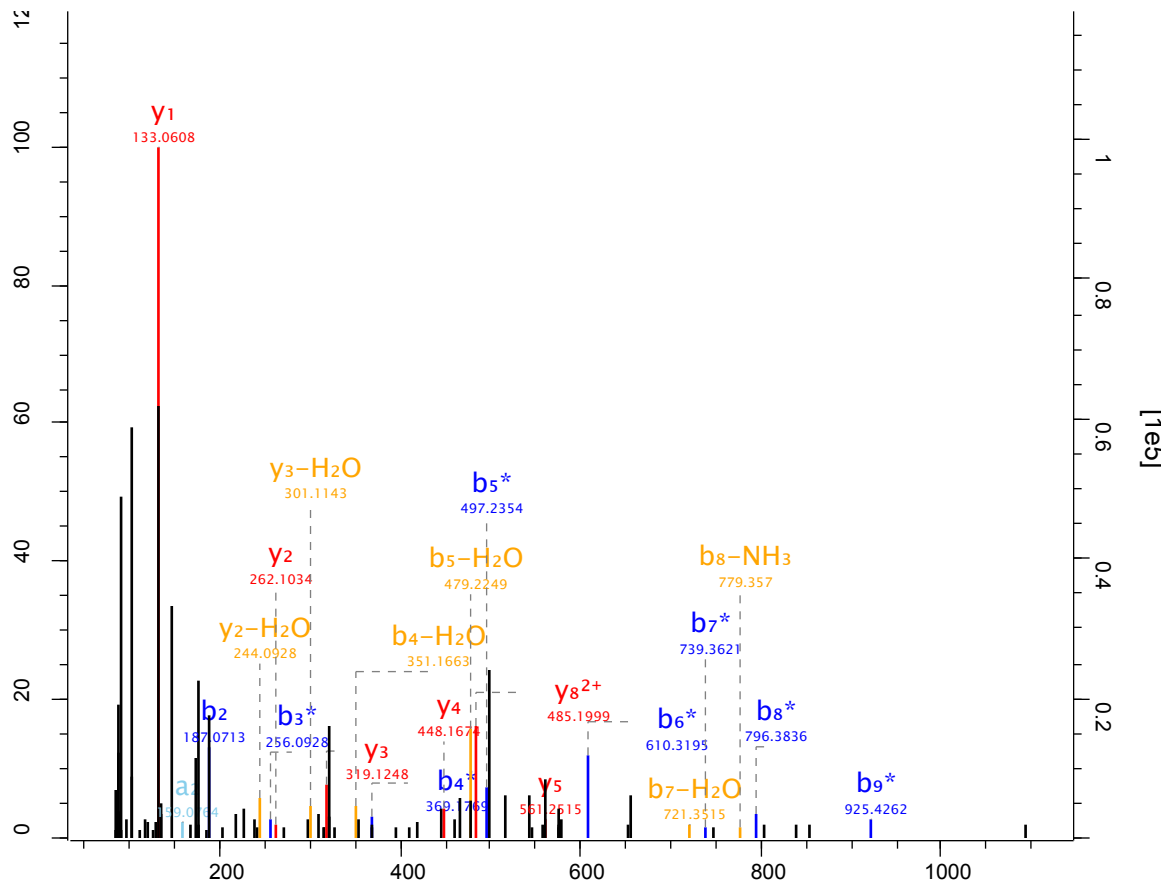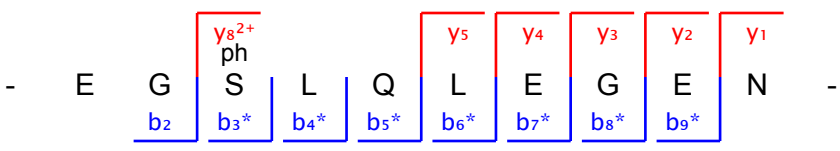

| Raw file         | Scan  | Method    | Score | m/z    |
|------------------|-------|-----------|-------|--------|
| 2013_COL15_30_34 | 24509 | FTMS; HCD | 50.09 | 758.33 |

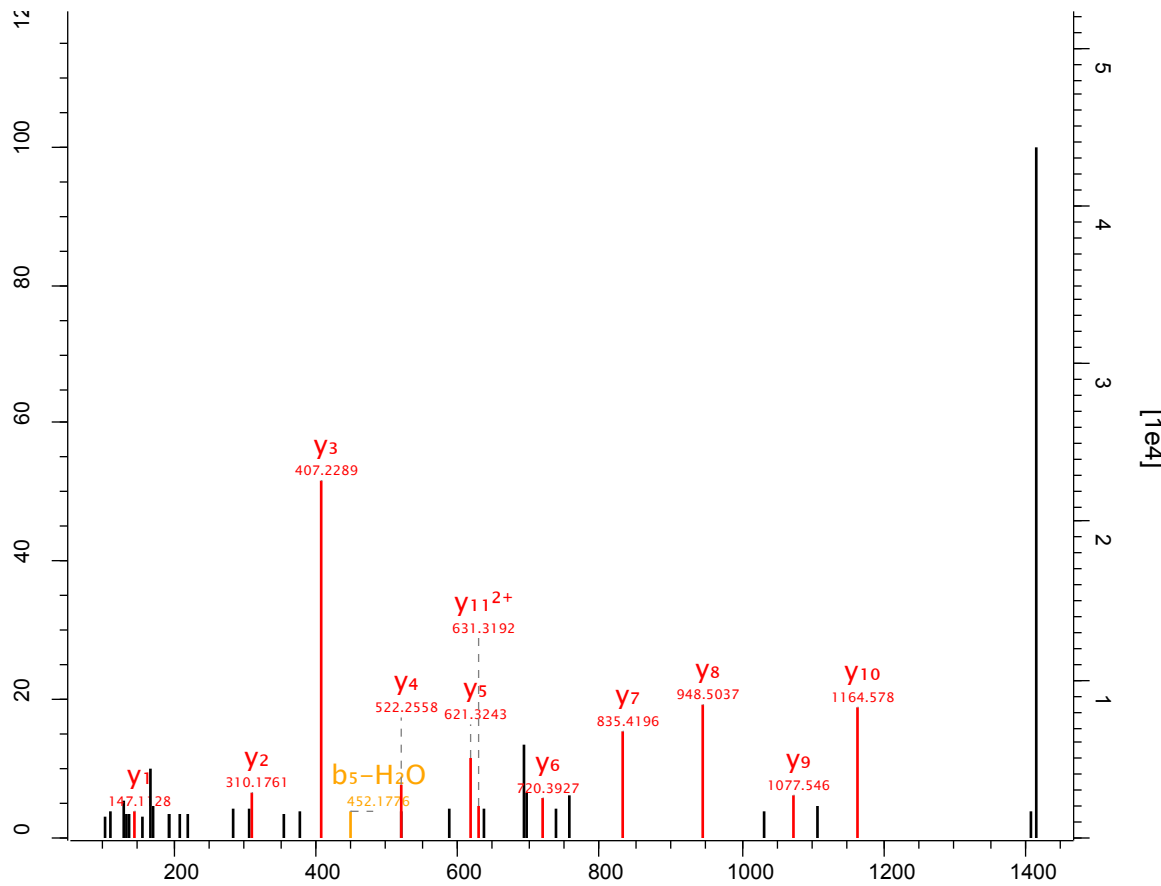

ph  
 - S S P S E L D V V D P Y K -

$y_{11}^{2+}$   $y_{10}$   $y_9$   $y_8$   $y_7$   $y_6$   $y_5$   $y_4$   $y_3$   $y_2$   $y_1$

Raw file Scan Method Score m/z  
 2013\_COL15\_30\_34 24565 FTMS; HCD 115.57 818.81

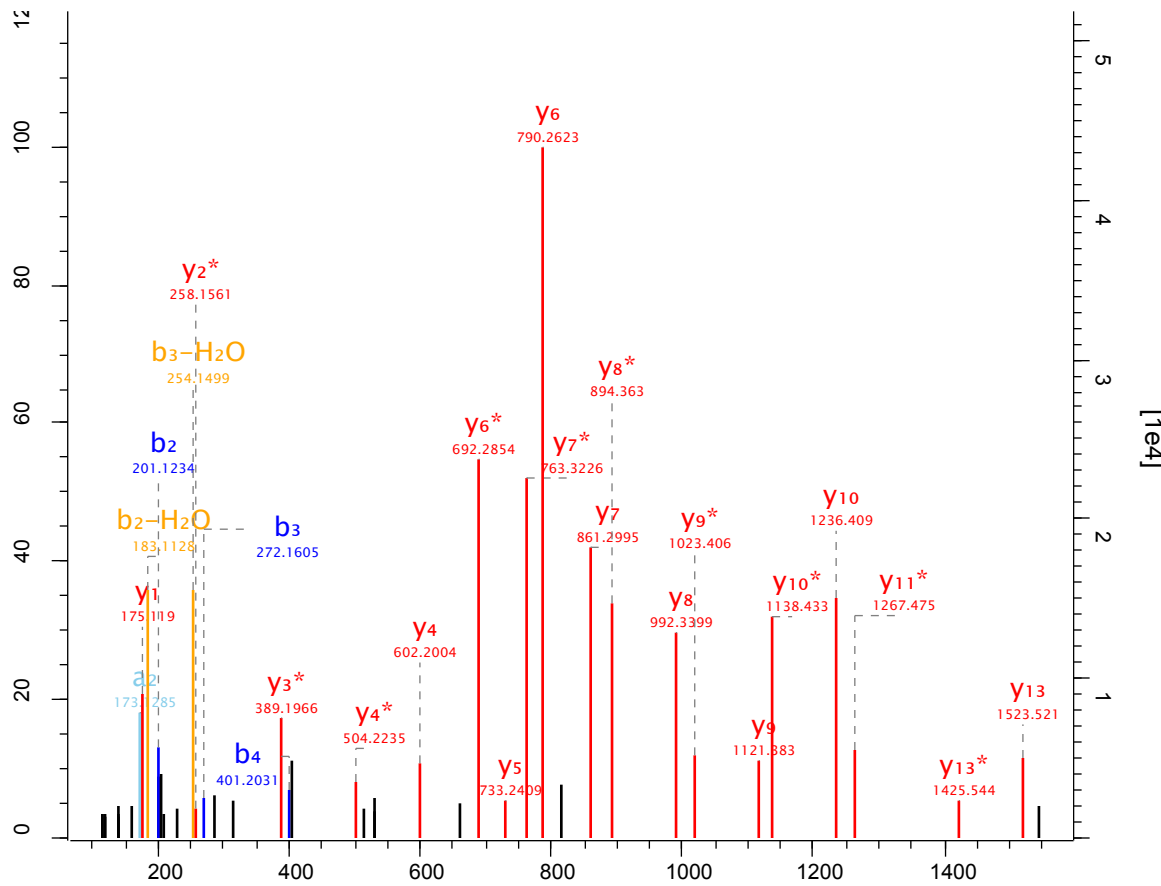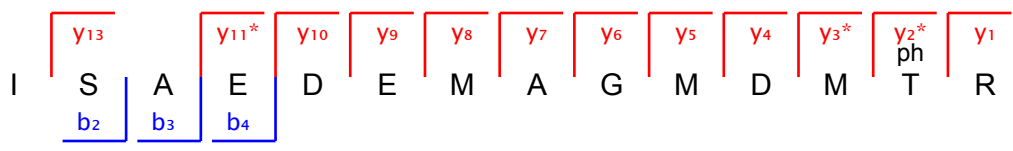

Raw file 2013\_COL15\_30\_34 Scan 24618 Method FTMS; HCD Score 137.12 m/z 826.34

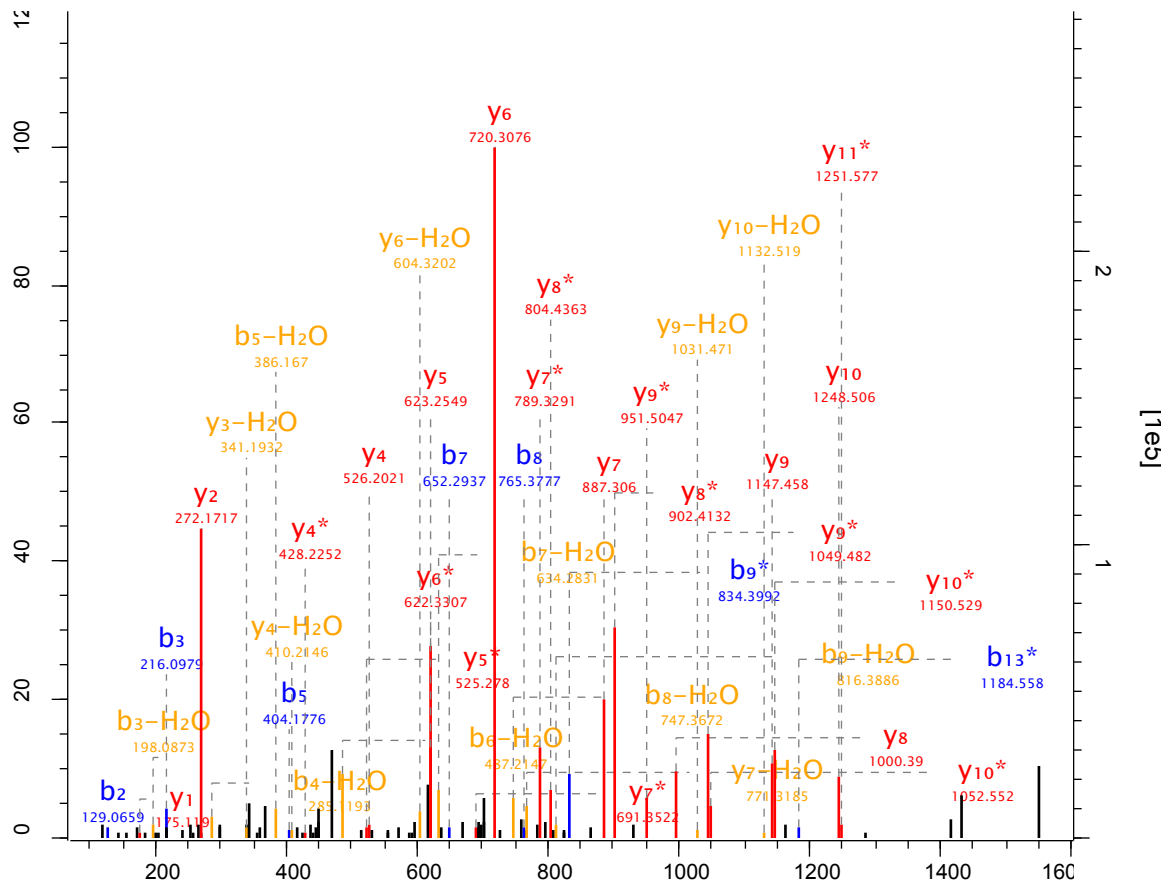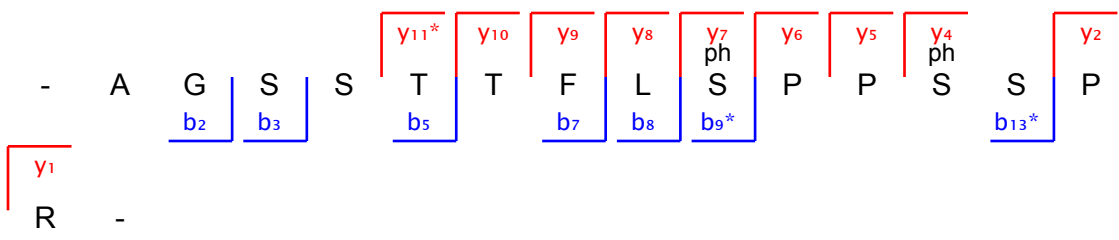

Raw file Scan Method Score m/z  
 2013\_COL15\_30\_34 24672 FTMS; HCD 44.44 630.3

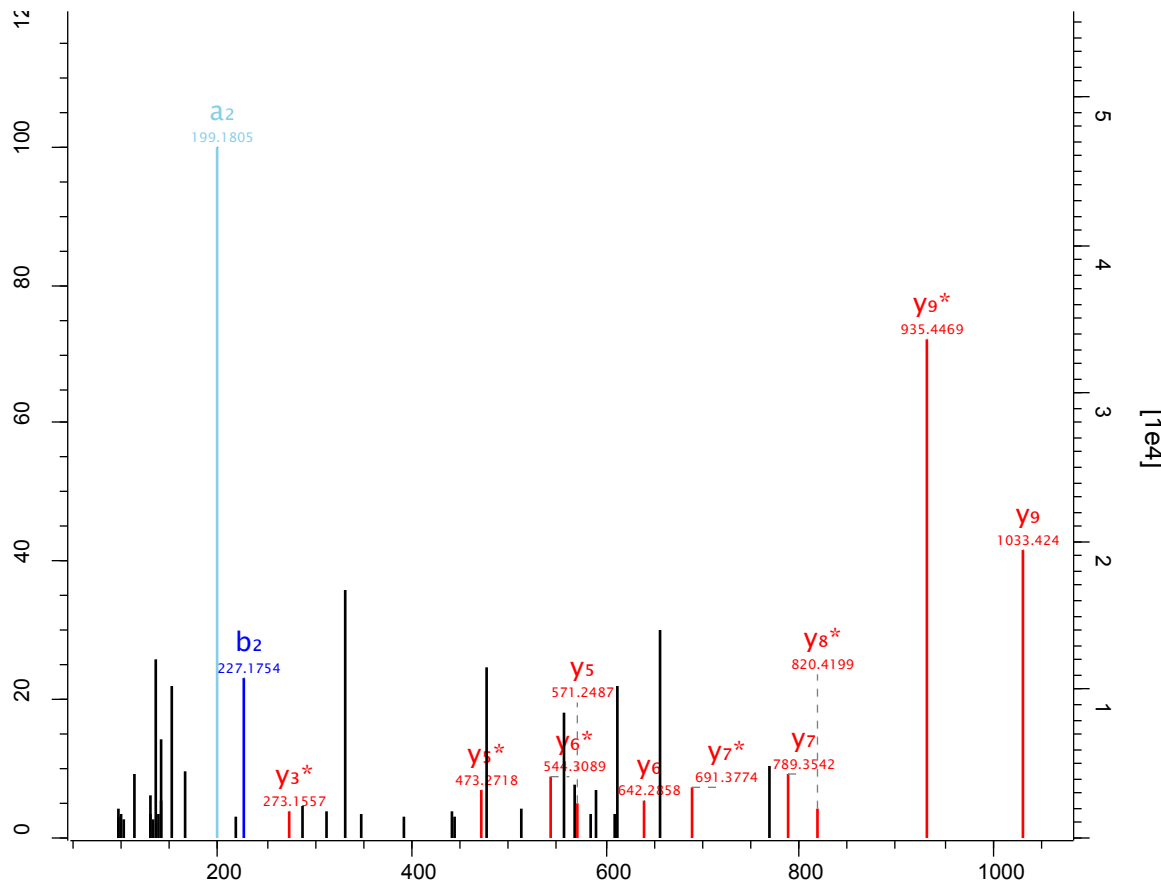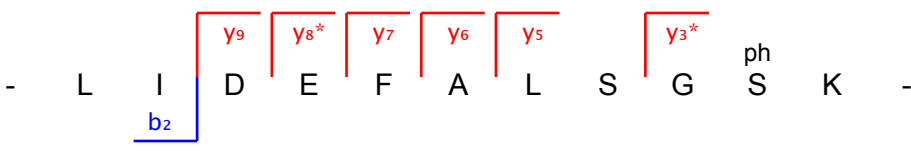

Raw file

Scan

Method

Score

m/z

2013\_COL15\_30\_34

24692

FTMS; HCD

47.75

706

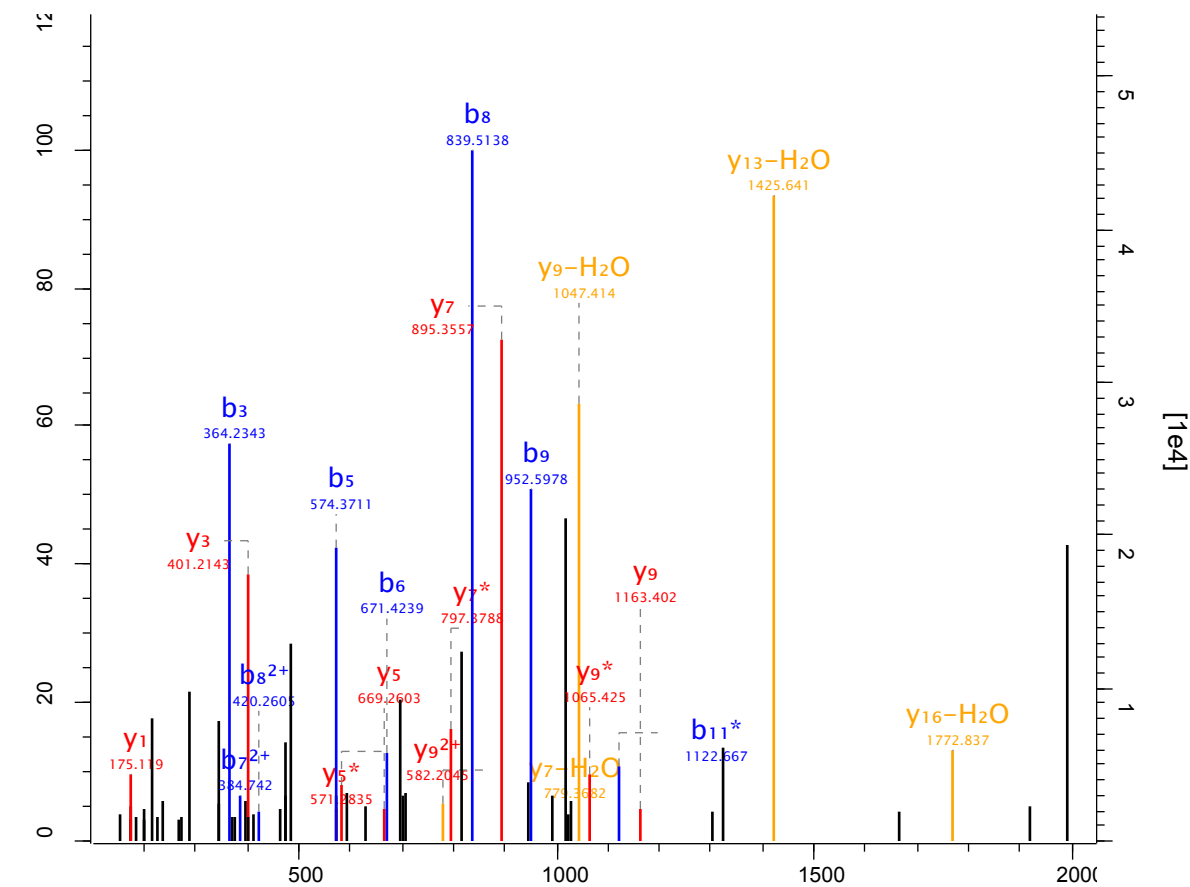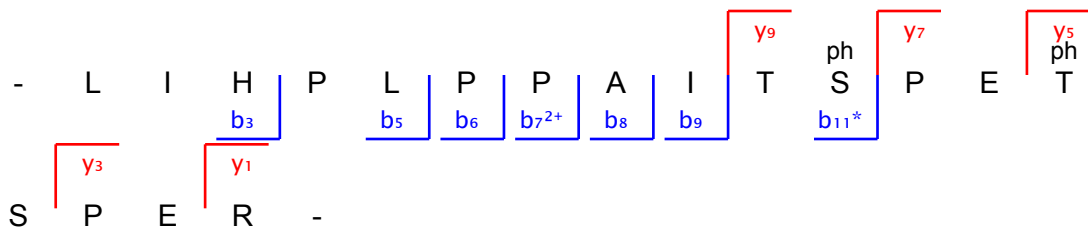



Raw file Scan Method Score m/z  
 2013\_COL15\_30\_34 25024 FTMS; HCD 200.2 928.42

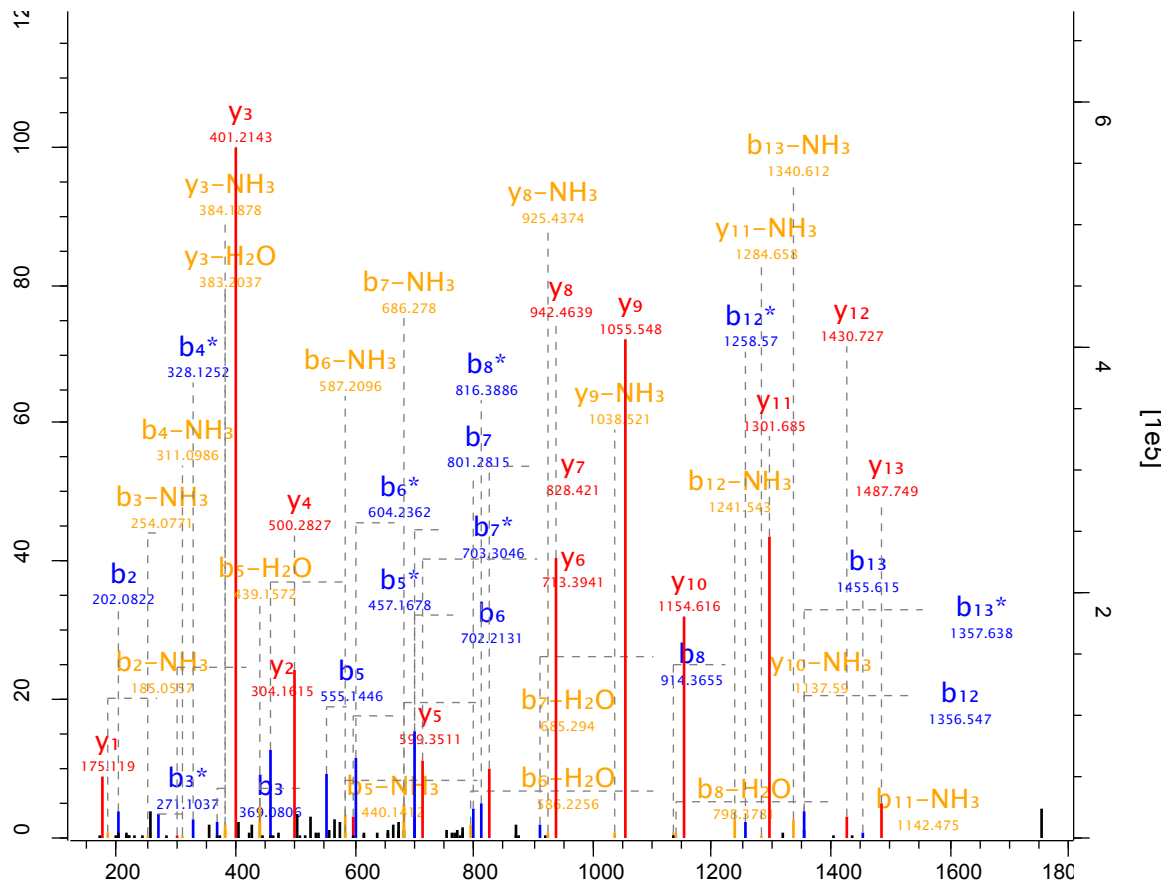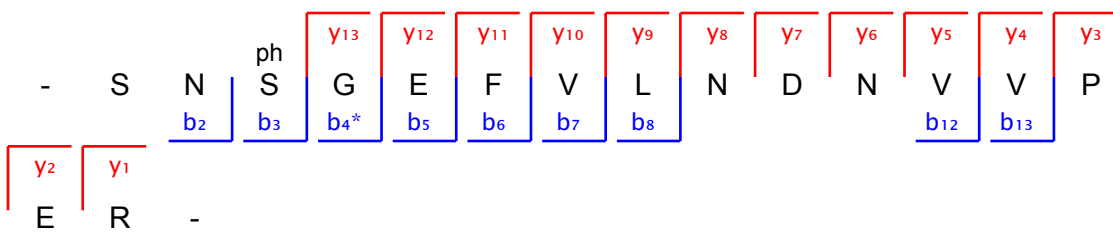

Raw file Scan Method Score m/z  
 2013\_COL15\_30\_34 25080 FTMS; HCD 148.52 805.36

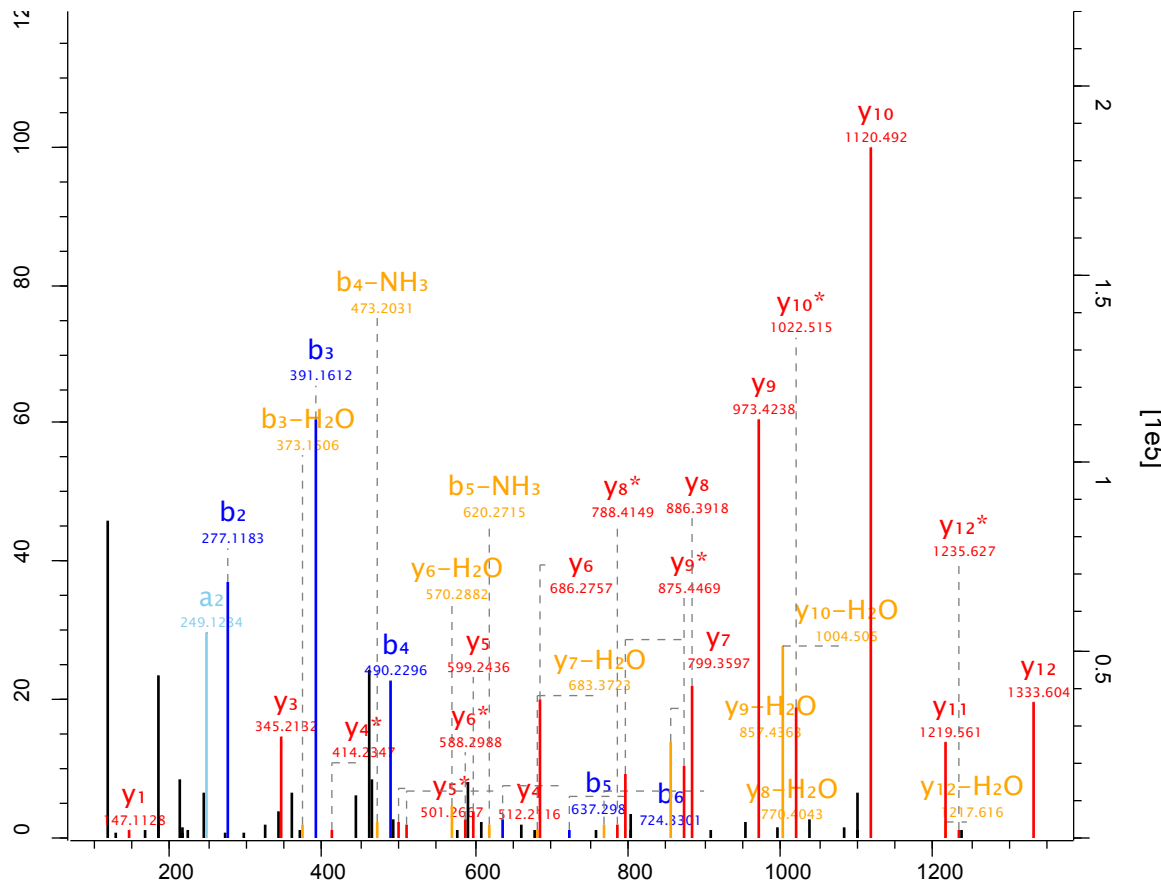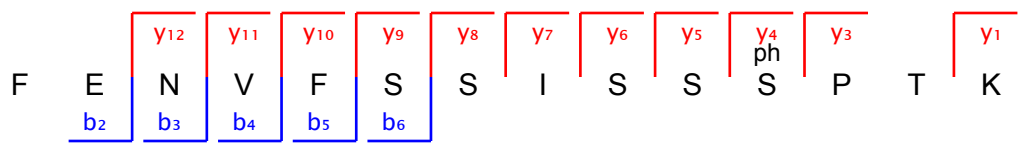

Raw file Scan Method Score m/z  
 2013\_COL15\_30\_34 25111 FTMS; HCD 94.63 900.92

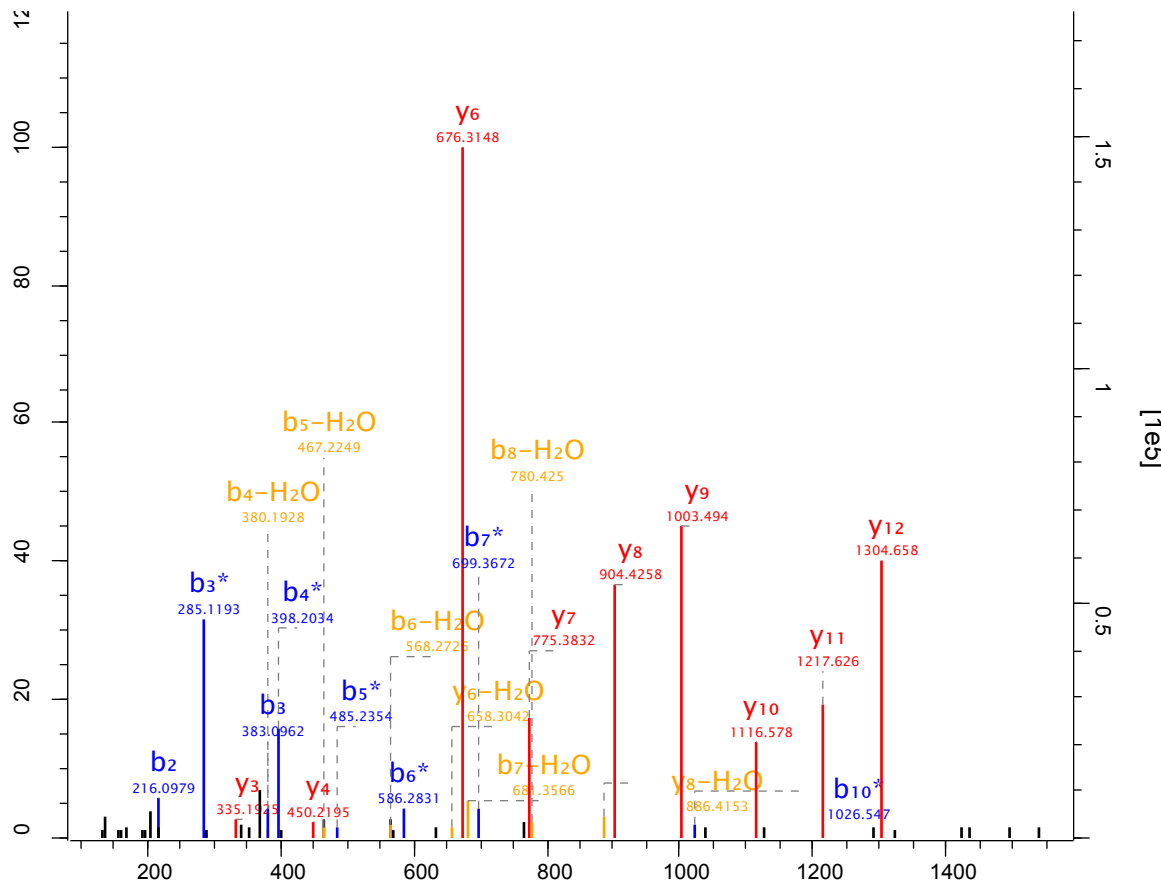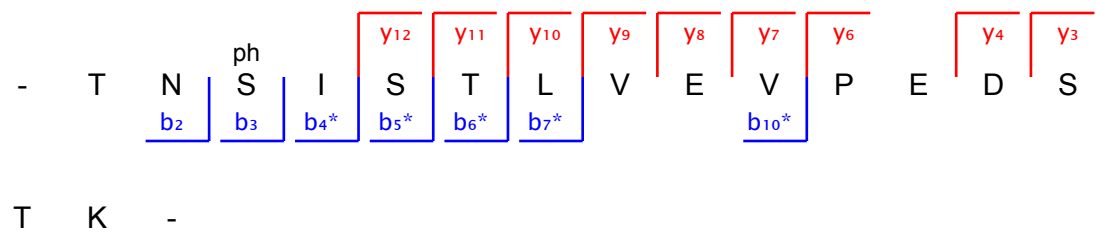

Raw file: 2013\_COL15\_30\_34  
 Scan: 25577  
 Method: FTMS; HCD  
 Score: 65.43  
 m/z: 745.71

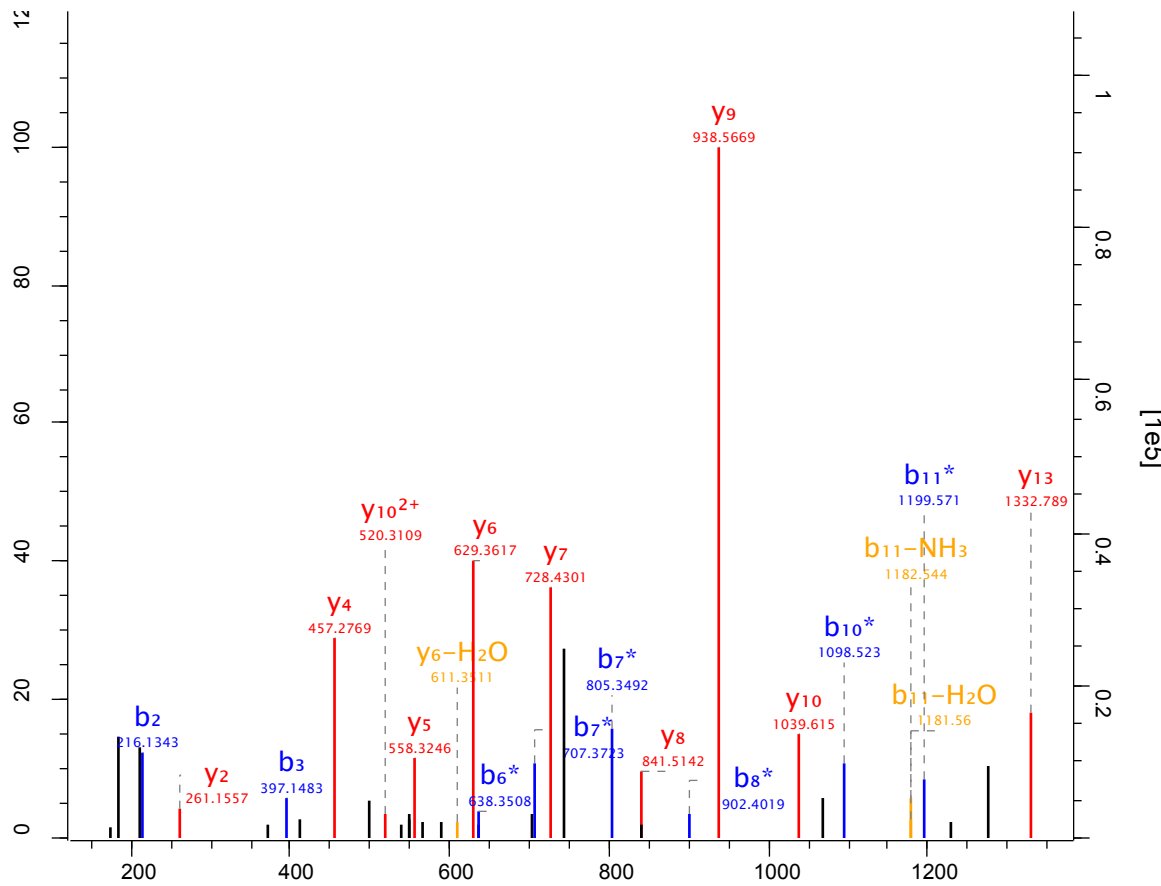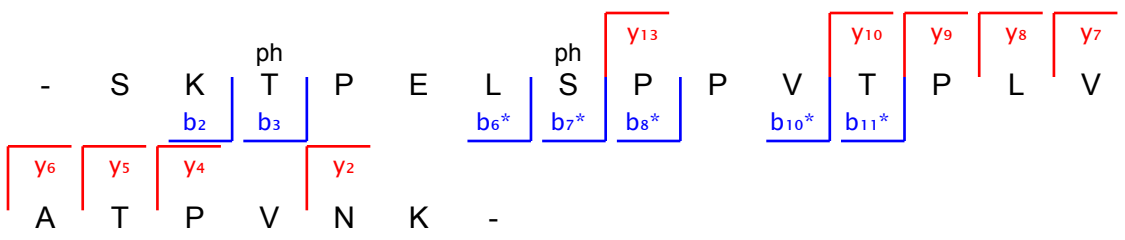

Raw file Scan Method Score m/z  
 2013\_COL15\_30\_34 2577 FTMS; HCD 64.24 484.89

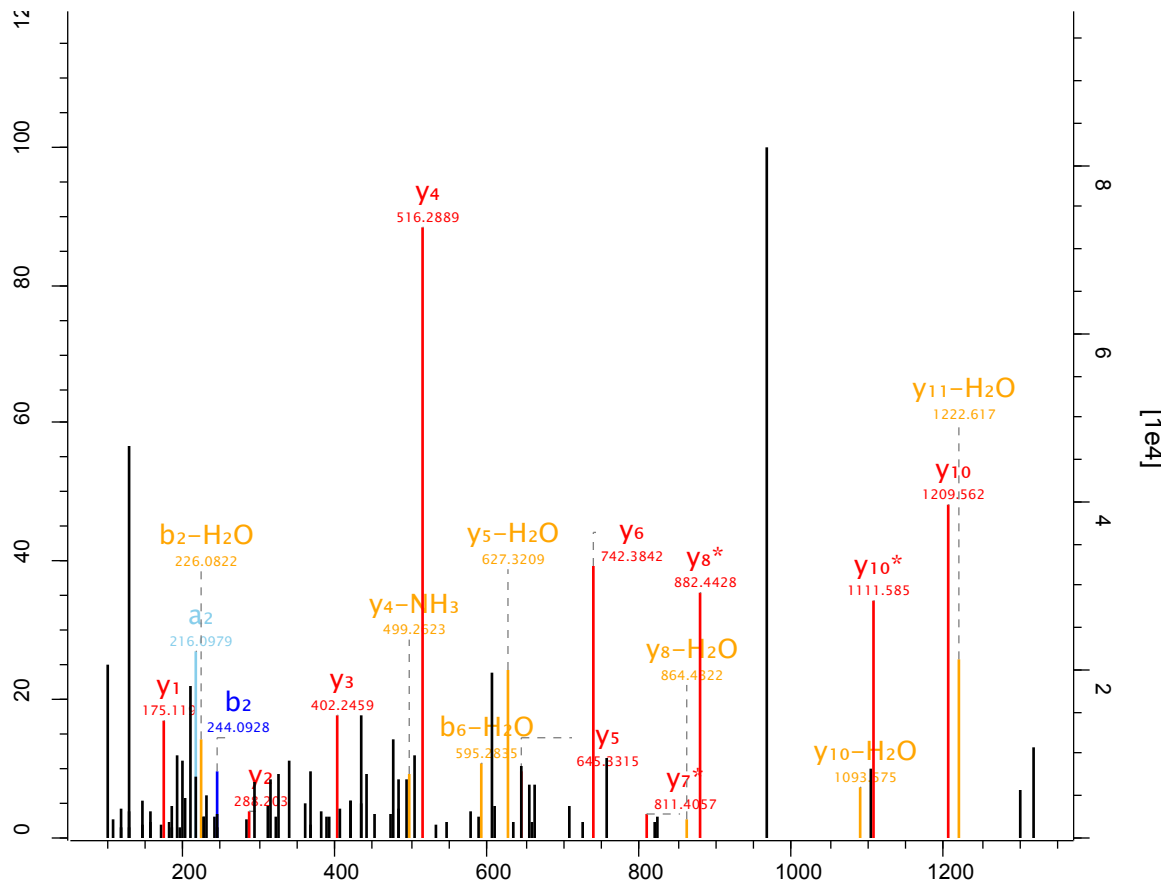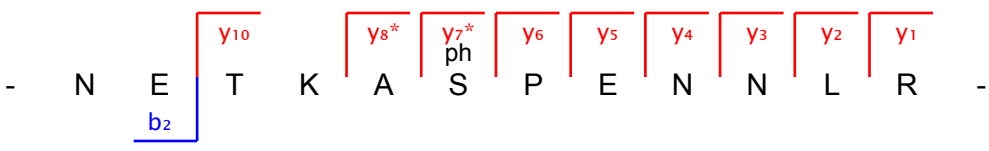

Raw file Scan Method Score m/z  
 2013\_COL15\_30\_34 25881 FTMS; HCD 51.73 631.76

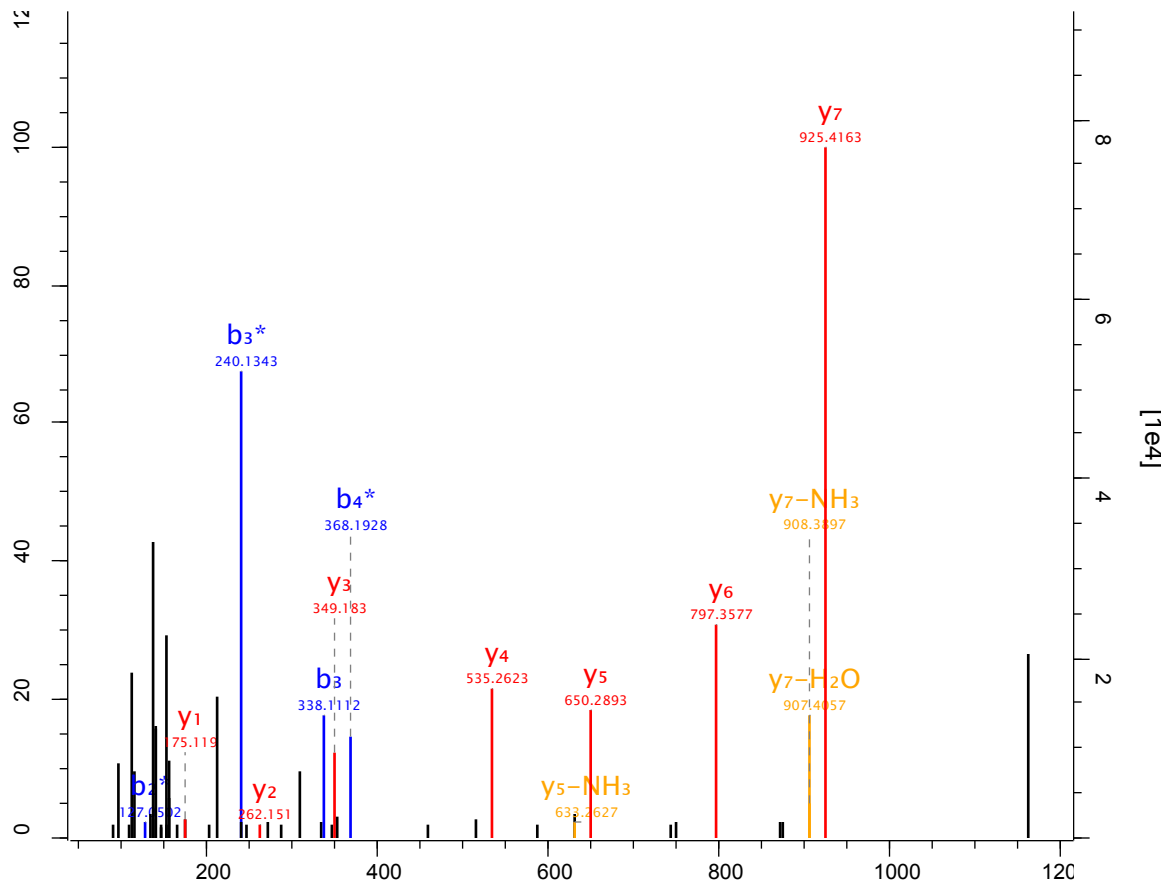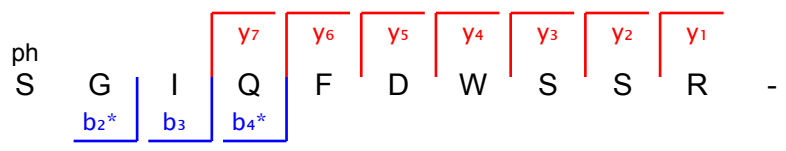

Raw file Scan Method Score m/z  
 2013\_COL15\_30\_34 26304 FTMS; HCD 87.32 951.93

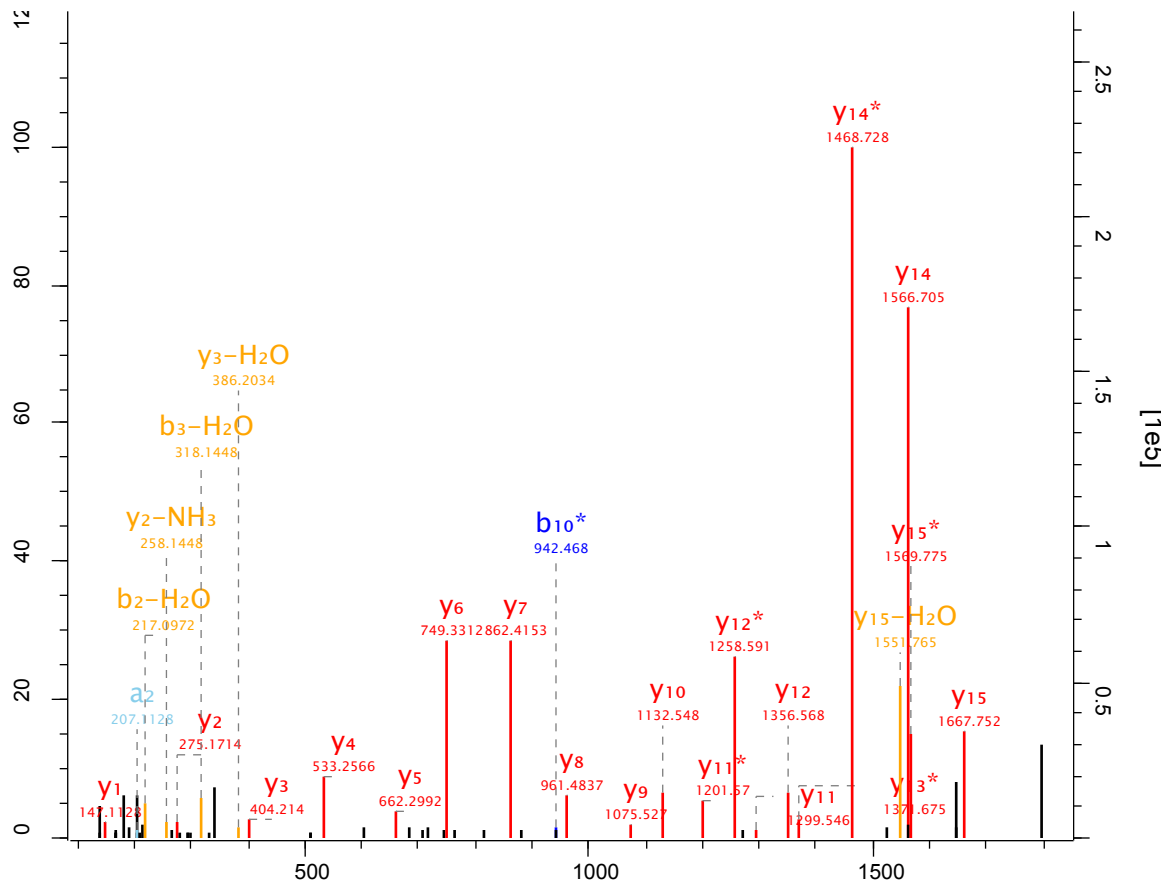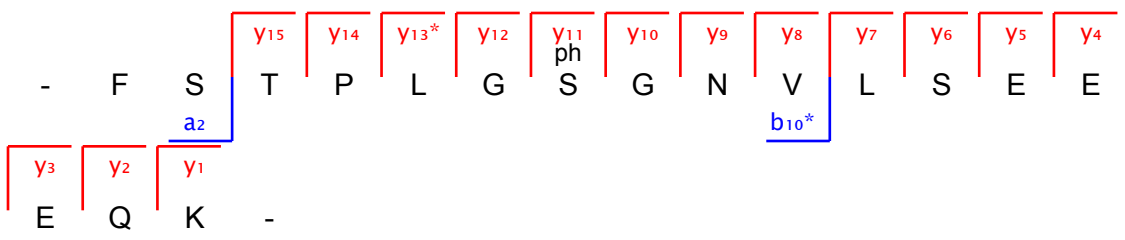

Raw file Scan Method Score m/z  
 2013\_COL15\_30\_34 26339 FTMS; HCD 63.38 765.04

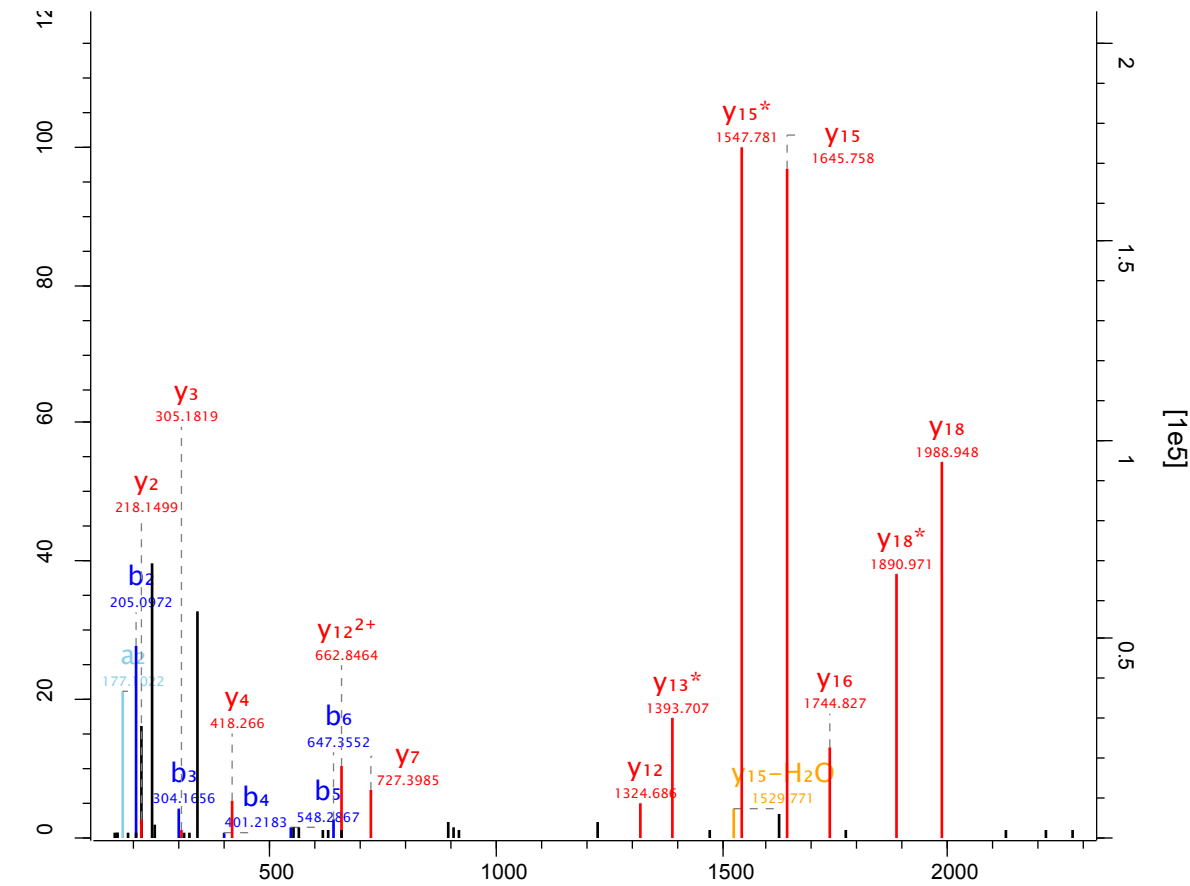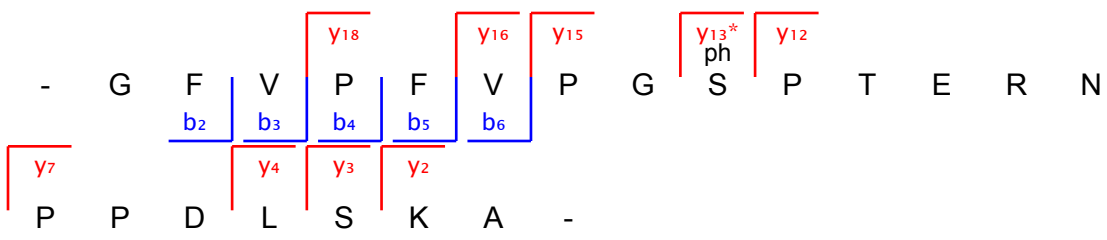



Raw file 2013\_COL15\_30\_34 Scan 26505 Method FTMS; HCD Score 125.71 m/z 1011.11

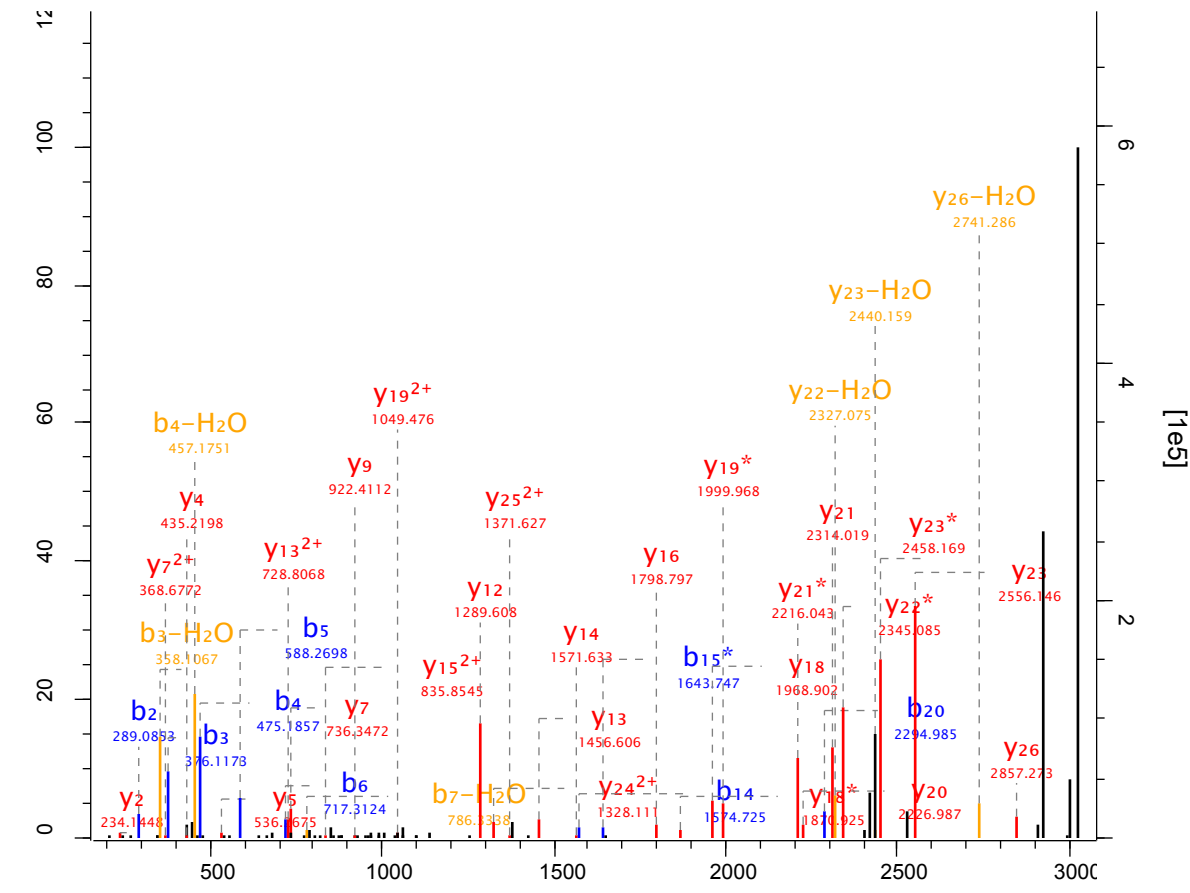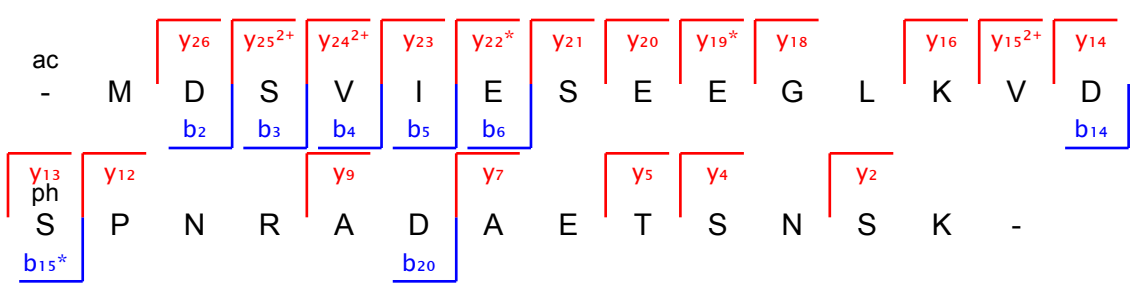

Raw file Scan Method Score m/z  
 2013\_COL15\_30\_34 26509 FTMS; HCD 43.84 802.67

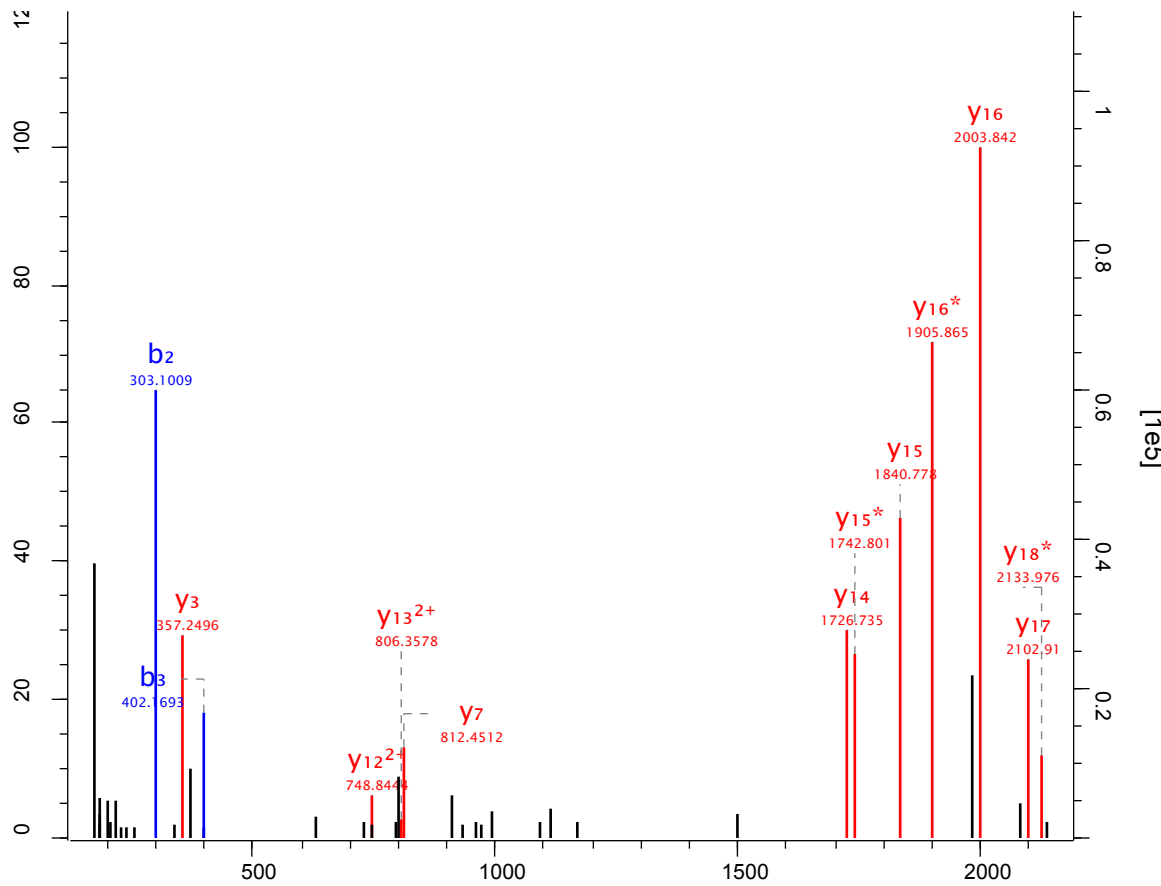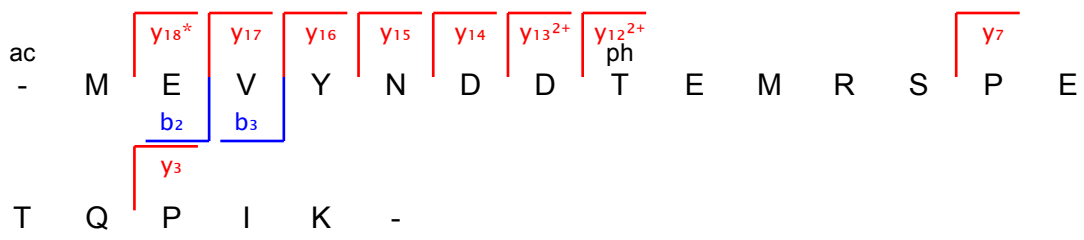

Raw file Scan Method Score m/z  
 2013\_COL15\_30\_34 2657 FTMS; HCD 124.38 439.2

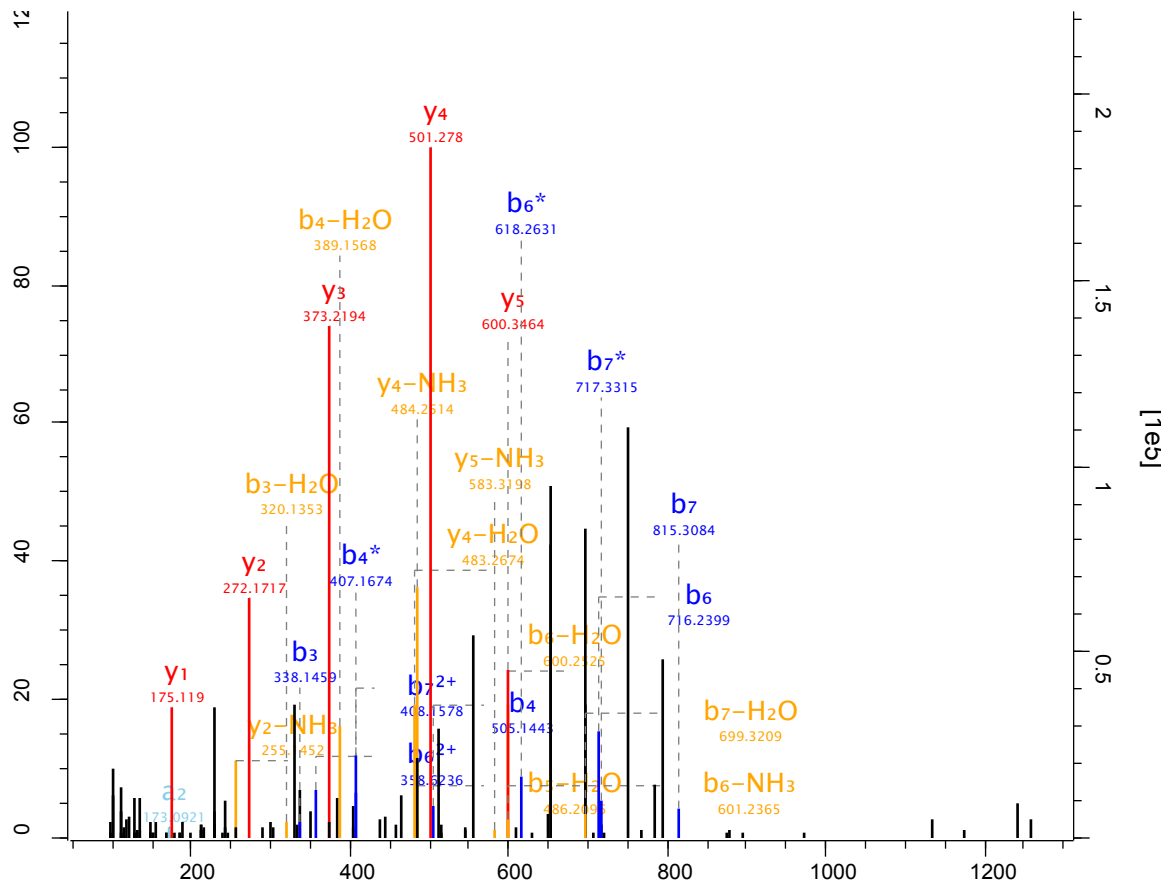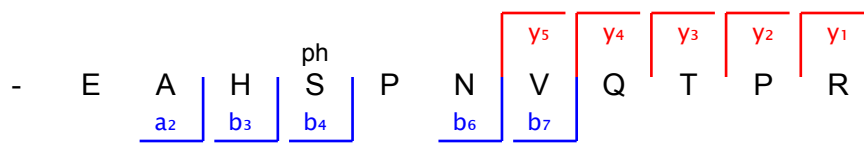

Raw file: 2013\_COL15\_30\_34  
 Scan: 26933  
 Method: FTMS; HCD  
 Score: 141.43  
 m/z: 811.69

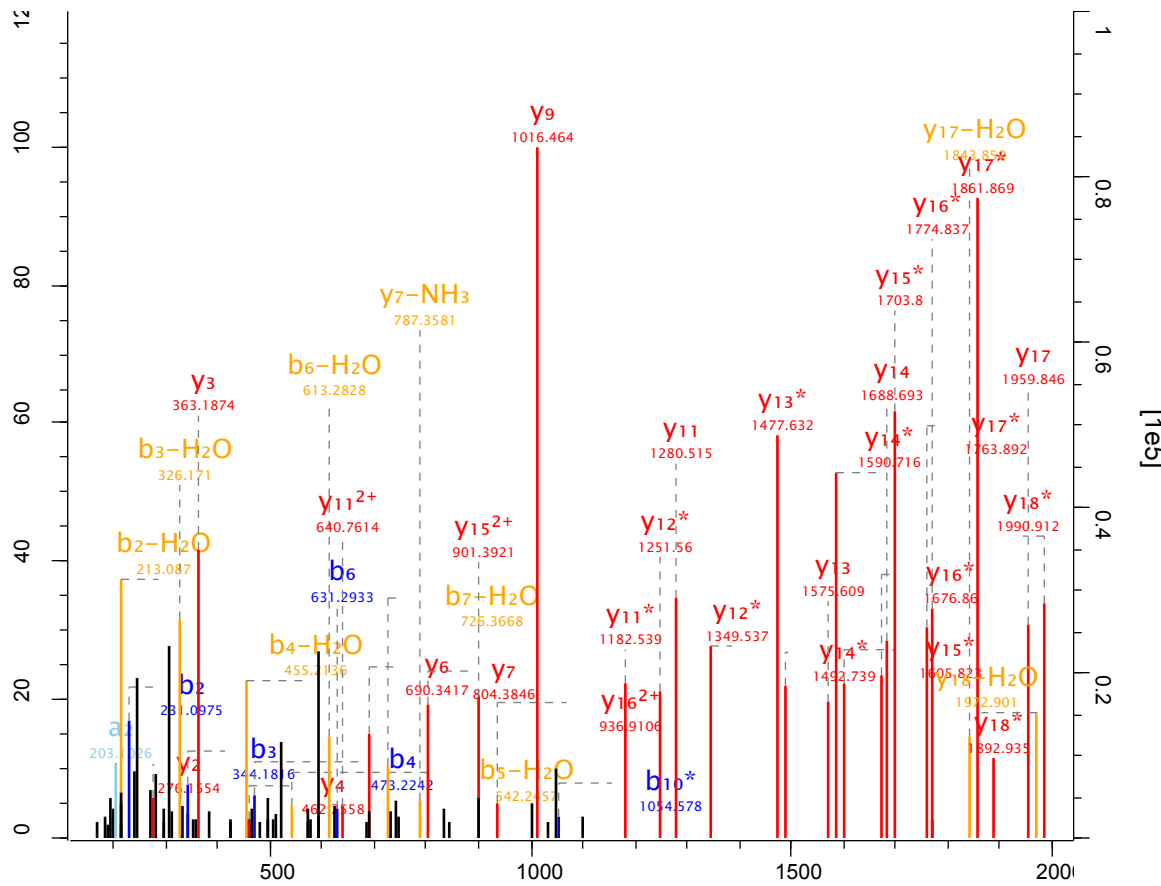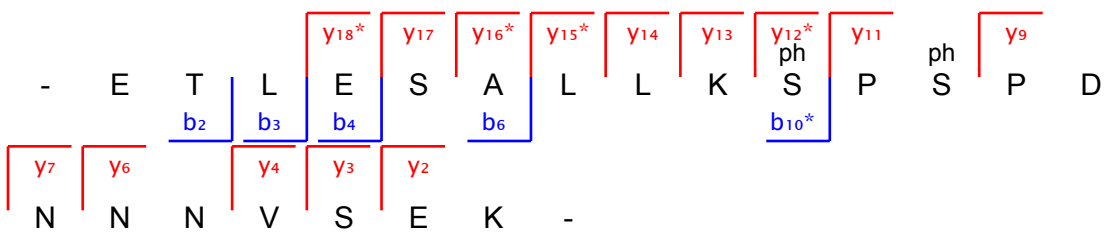

Raw file Scan Method Score m/z  
 2013\_COL15\_30\_34 26978 FTMS; HCD 62.03 1002.43

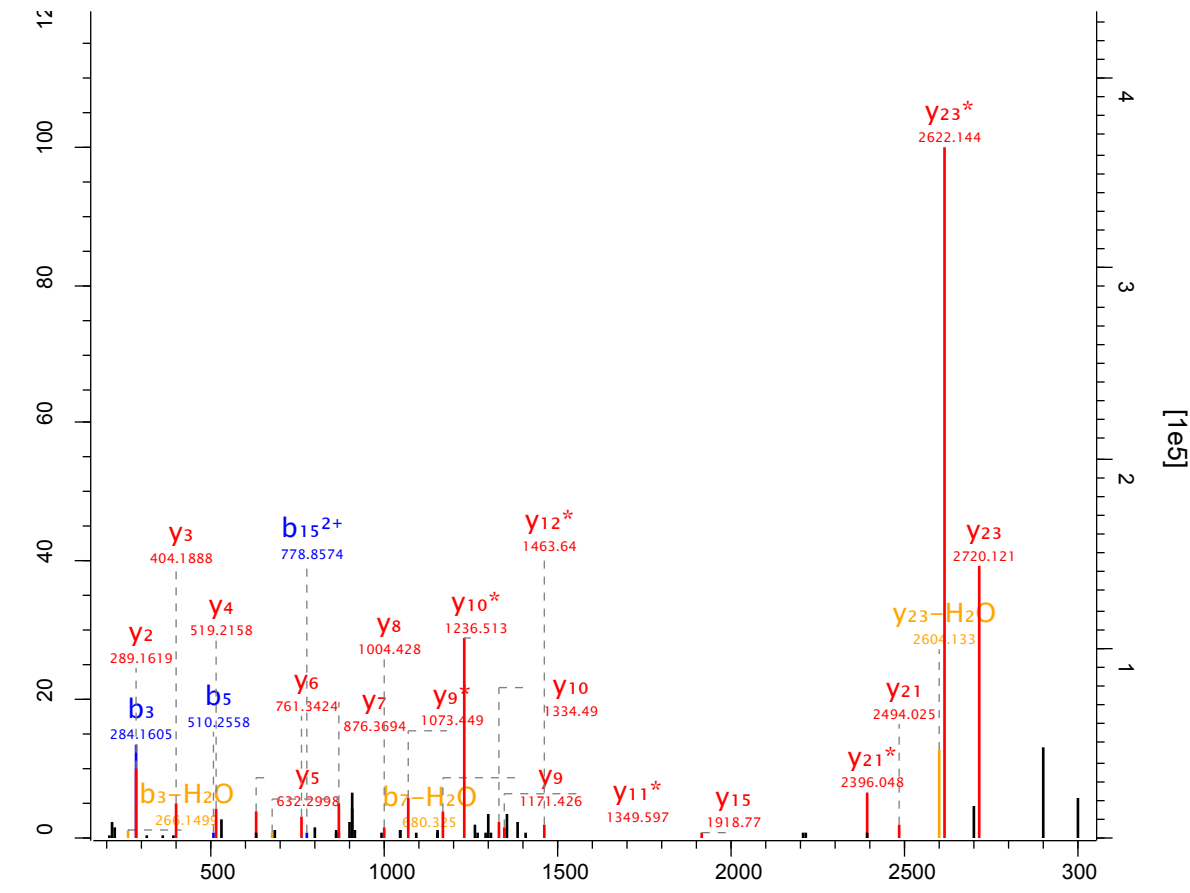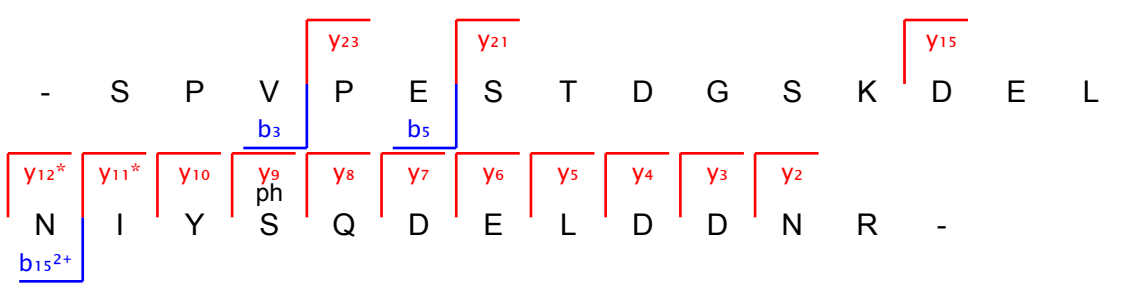

Raw file Scan Method Score m/z  
 2013\_COL15\_30\_34 27297 FTMS; HCD 72.93 778.68

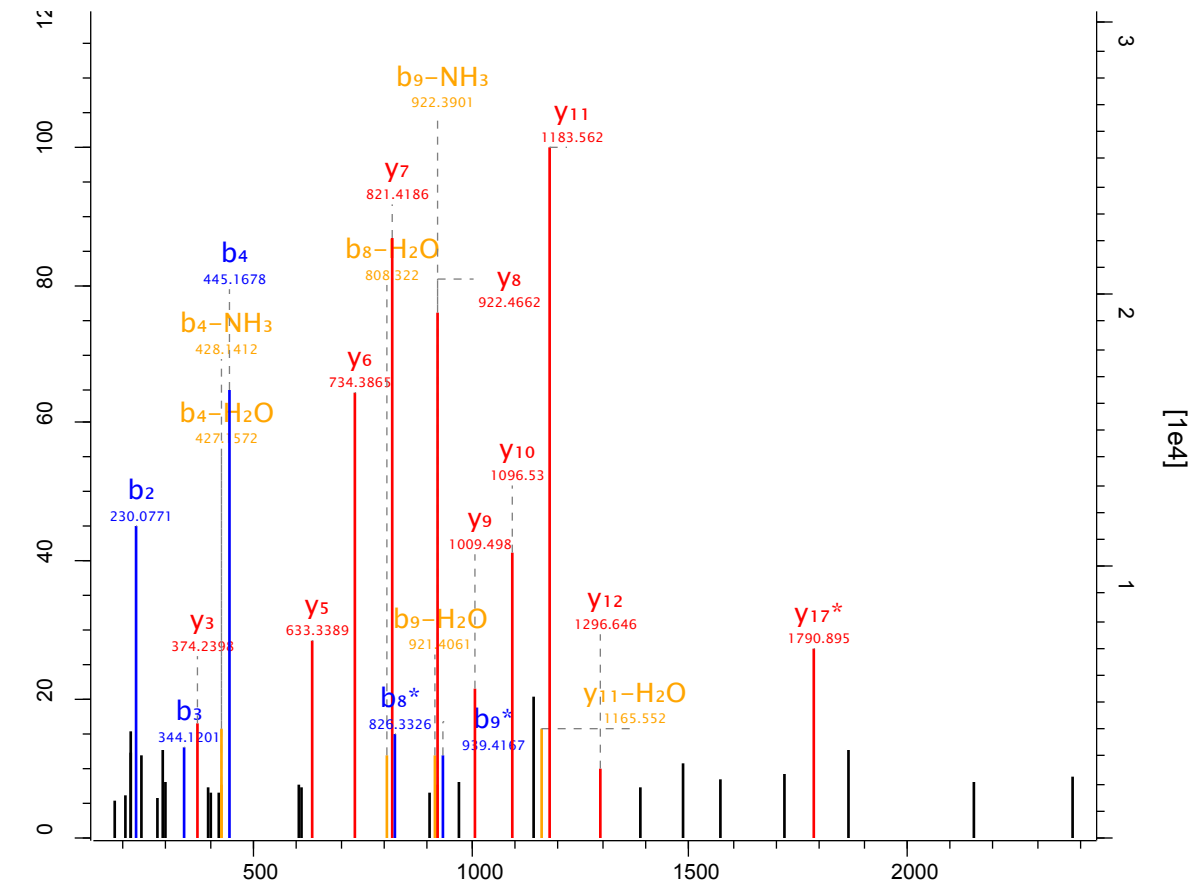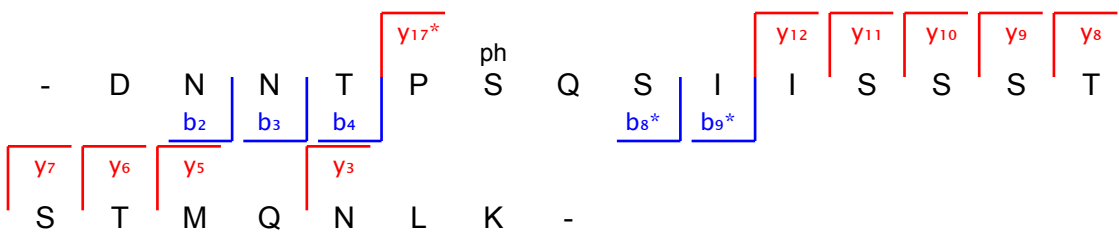

Raw file 2013\_COL15\_30\_34 Scan 27550 Method FTMS; HCD Score 88.54 m/z 750.69

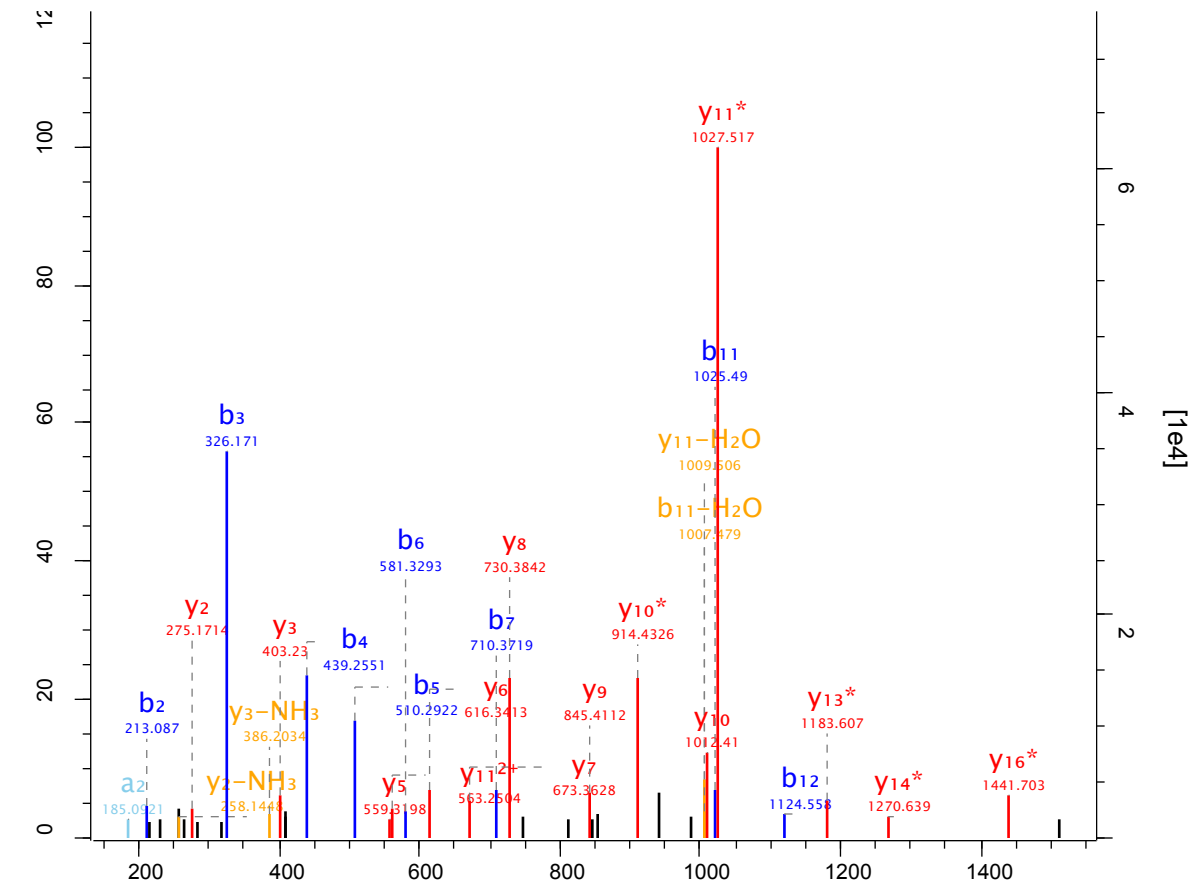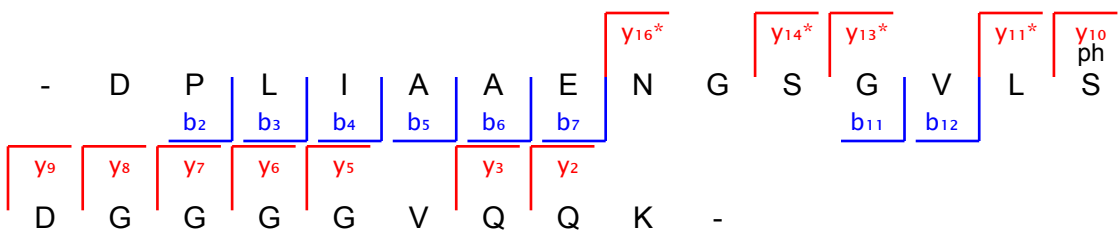

Raw file Scan Method Score m/z  
 2013\_COL15\_30\_34 27595 FTMS; HCD 55.13 723.66

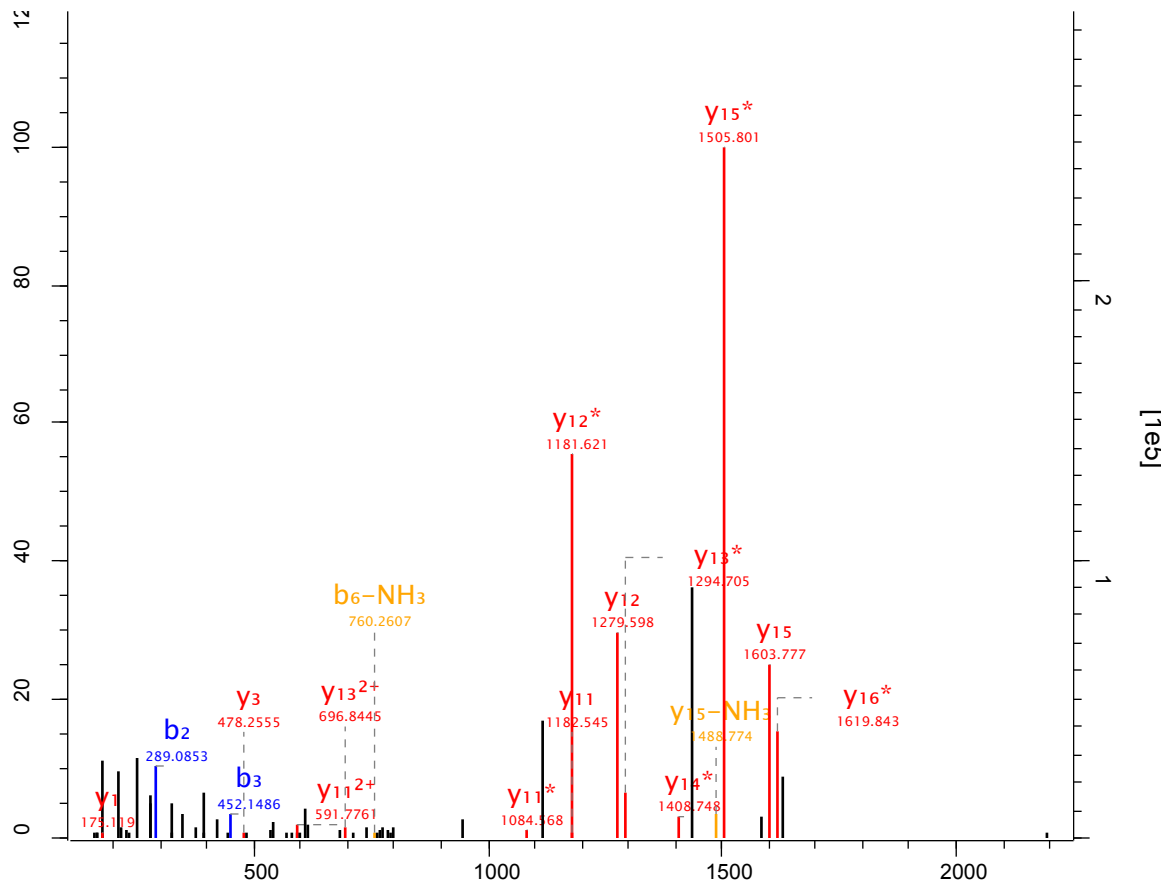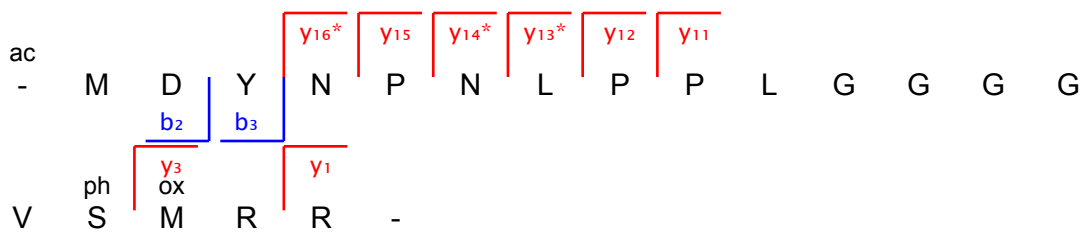



Raw file Scan Method Score m/z  
 2013\_COL15\_30\_34 27850 FTMS; HCD 131.86 652.78

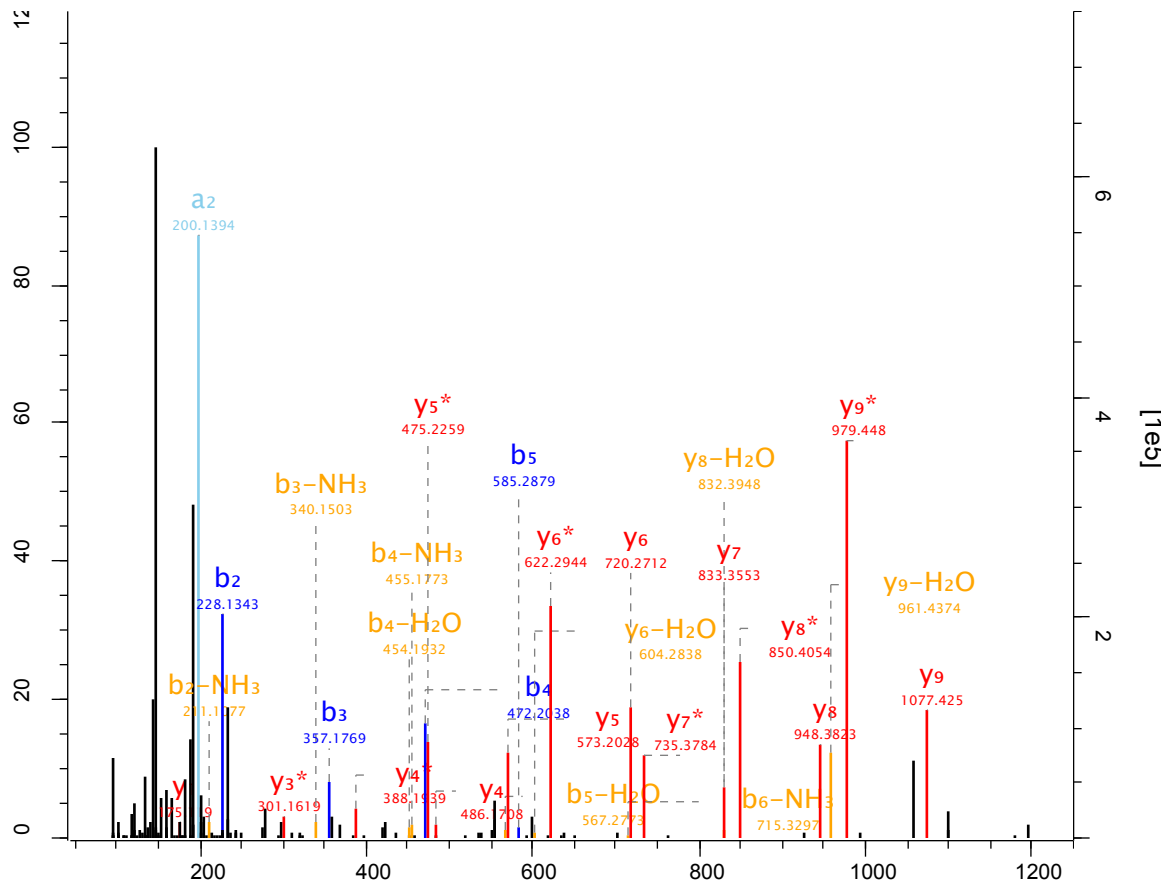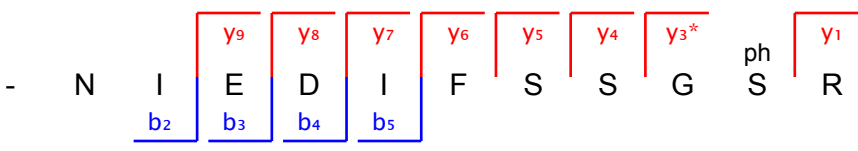

Raw file 2013\_COL15\_30\_34 Scan 28075 Method FTMS; HCD Score 83.4 m/z 774.02

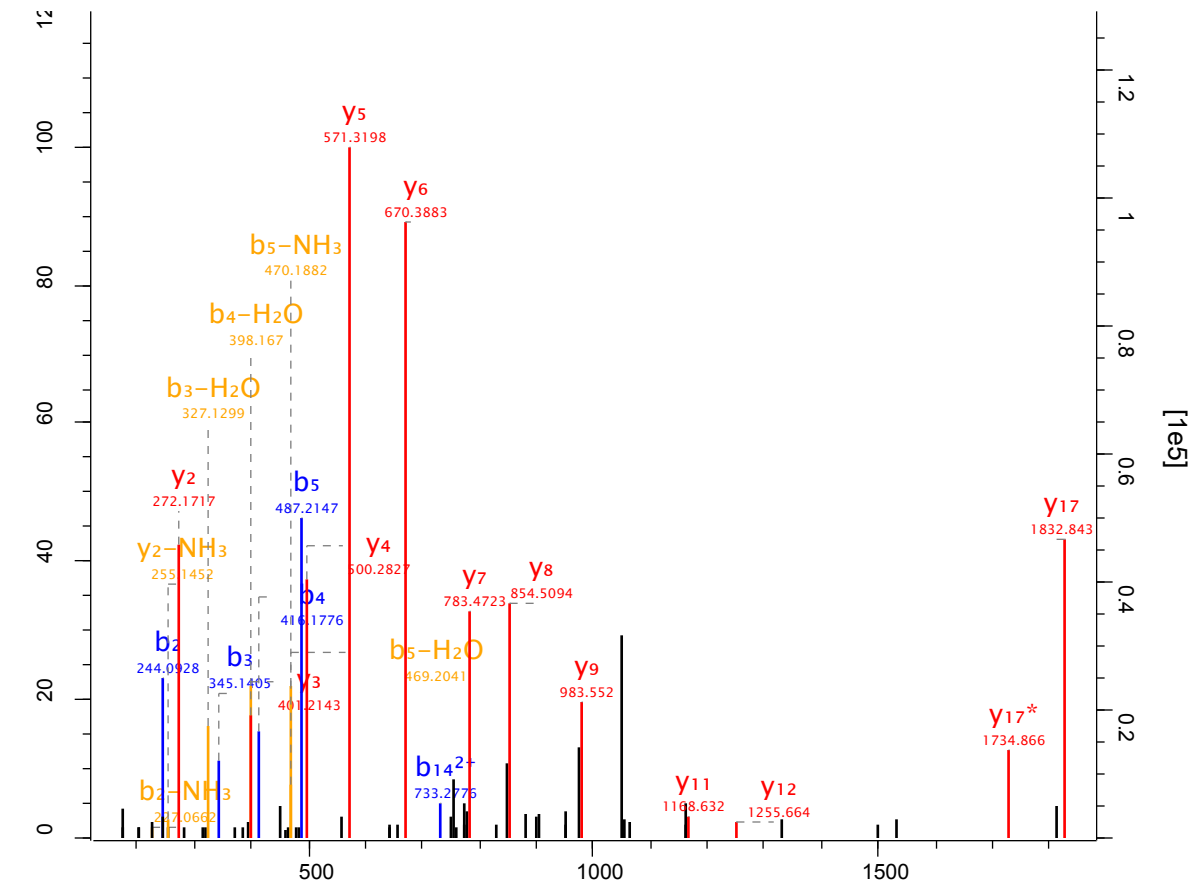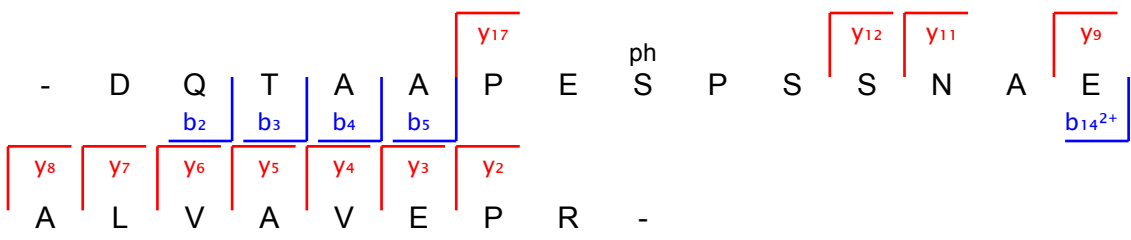

Raw file Scan Method Score m/z  
 2013\_COL15\_30\_34 28404 FTMS; HCD 99.41 800.37

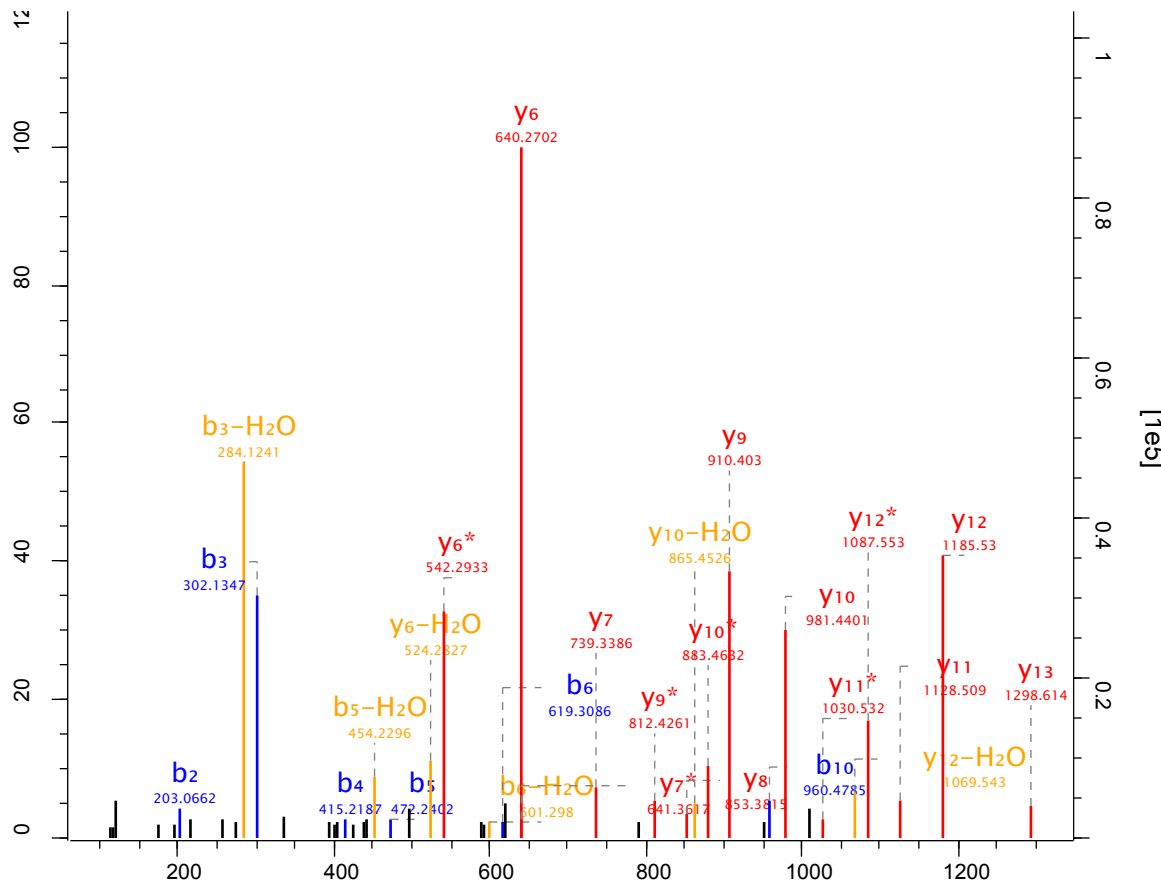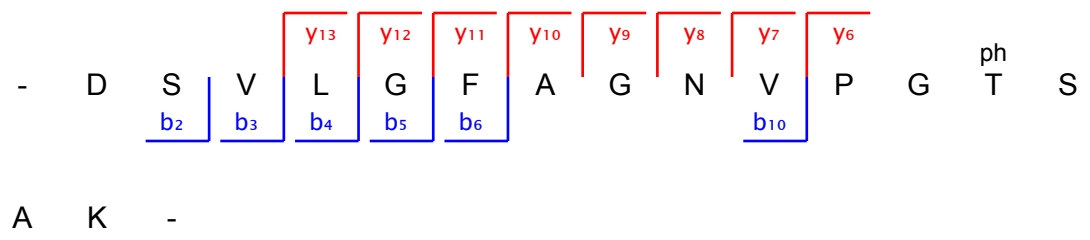

A K -

Raw file Scan Method Score m/z  
 2013\_COL15\_30\_34 28460 FTMS; HCD 132.14 913.9

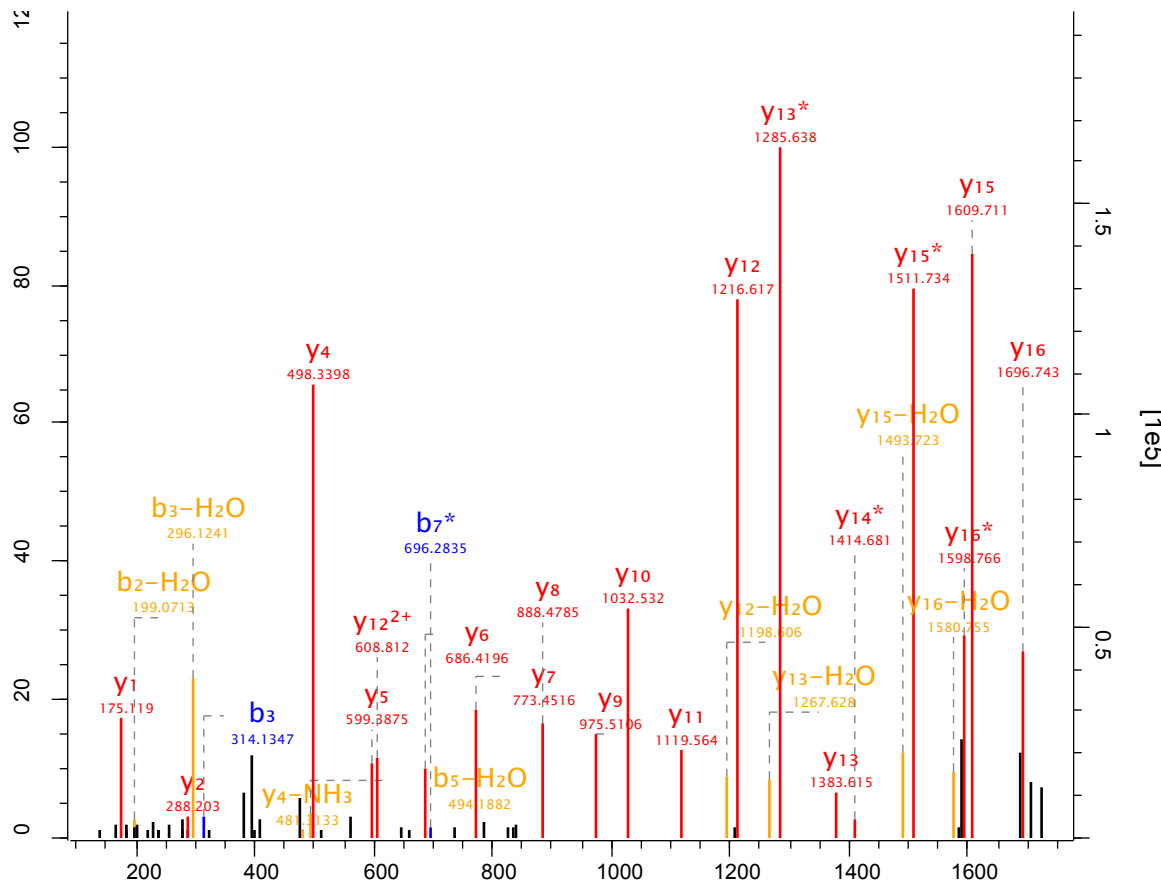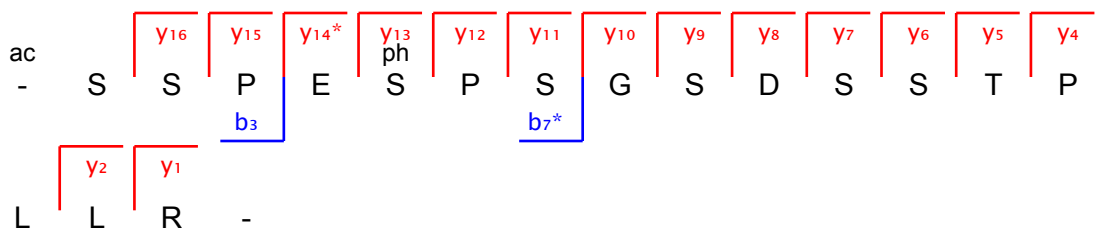

| Raw file         | Scan  | Method    | Score | m/z   |
|------------------|-------|-----------|-------|-------|
| 2013_COL15_30_34 | 28652 | FTMS; HCD | 77.42 | 688.8 |

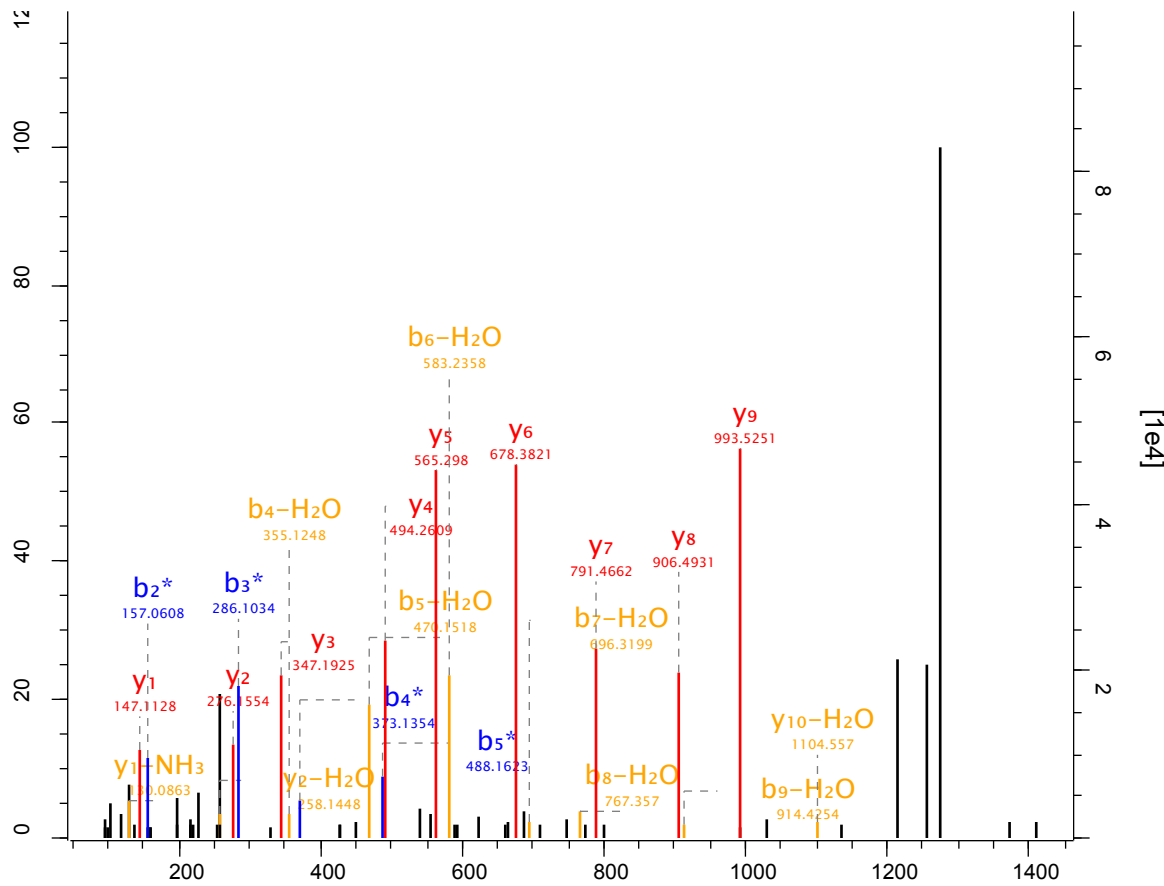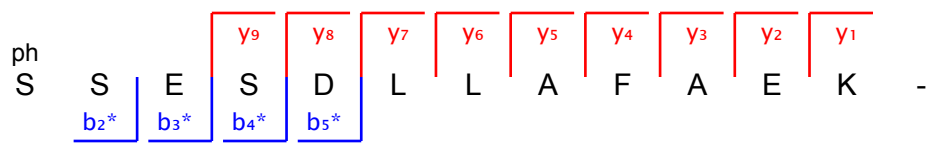

Raw file Scan Method Score m/z  
 2013\_COL15\_30\_34 28653 FTMS; HCD 48.22 835.34

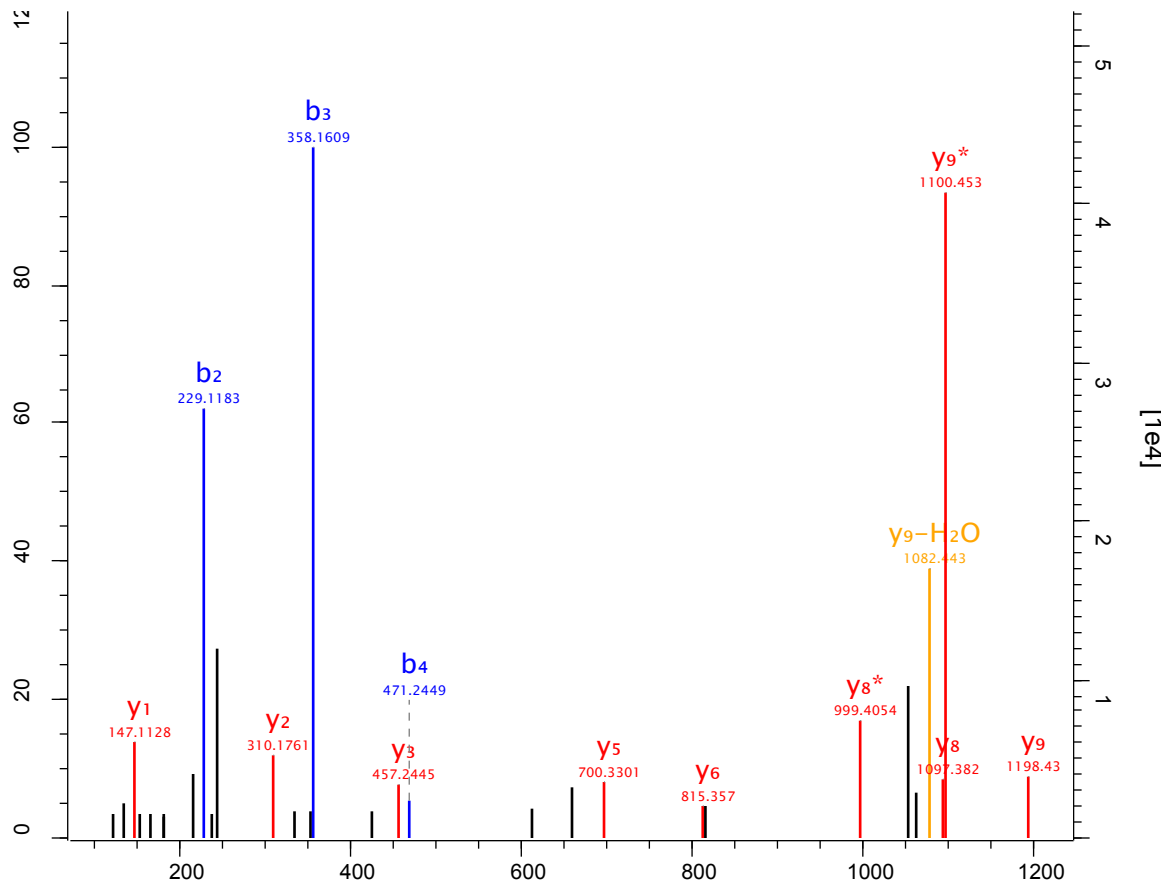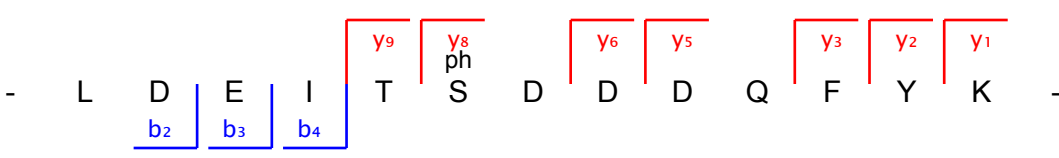



Raw file Scan Method Score m/z  
 2013\_COL15\_30\_34 2941 FTMS; HCD 118.19 512.2

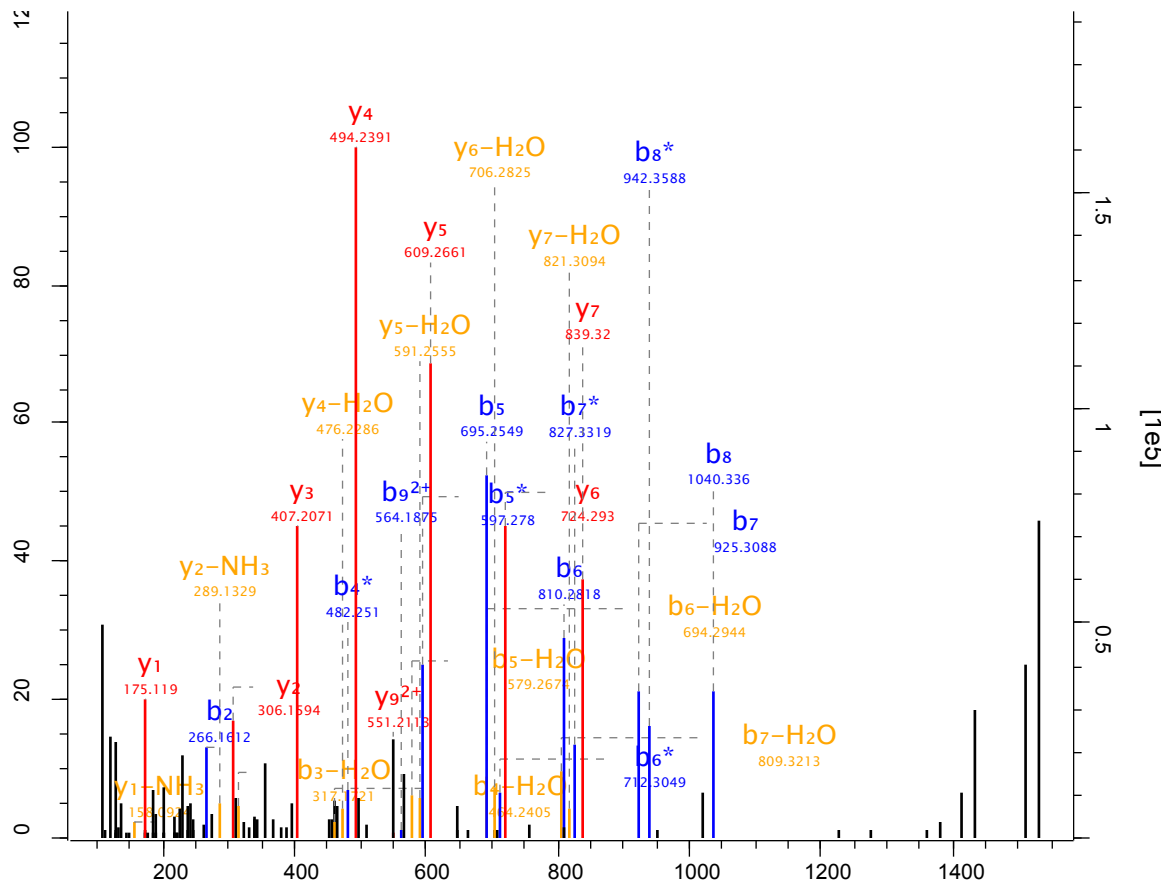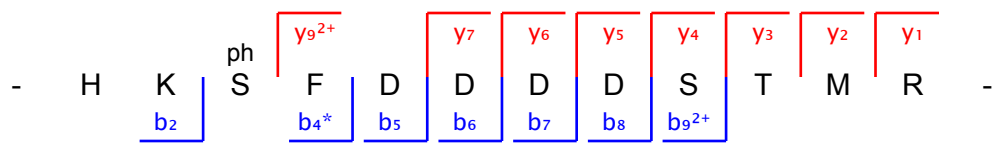



| Raw file         | Scan  | Method    | Score  | m/z    |
|------------------|-------|-----------|--------|--------|
| 2013_COL15_30_34 | 30145 | FTMS; HCD | 104.88 | 906.42 |

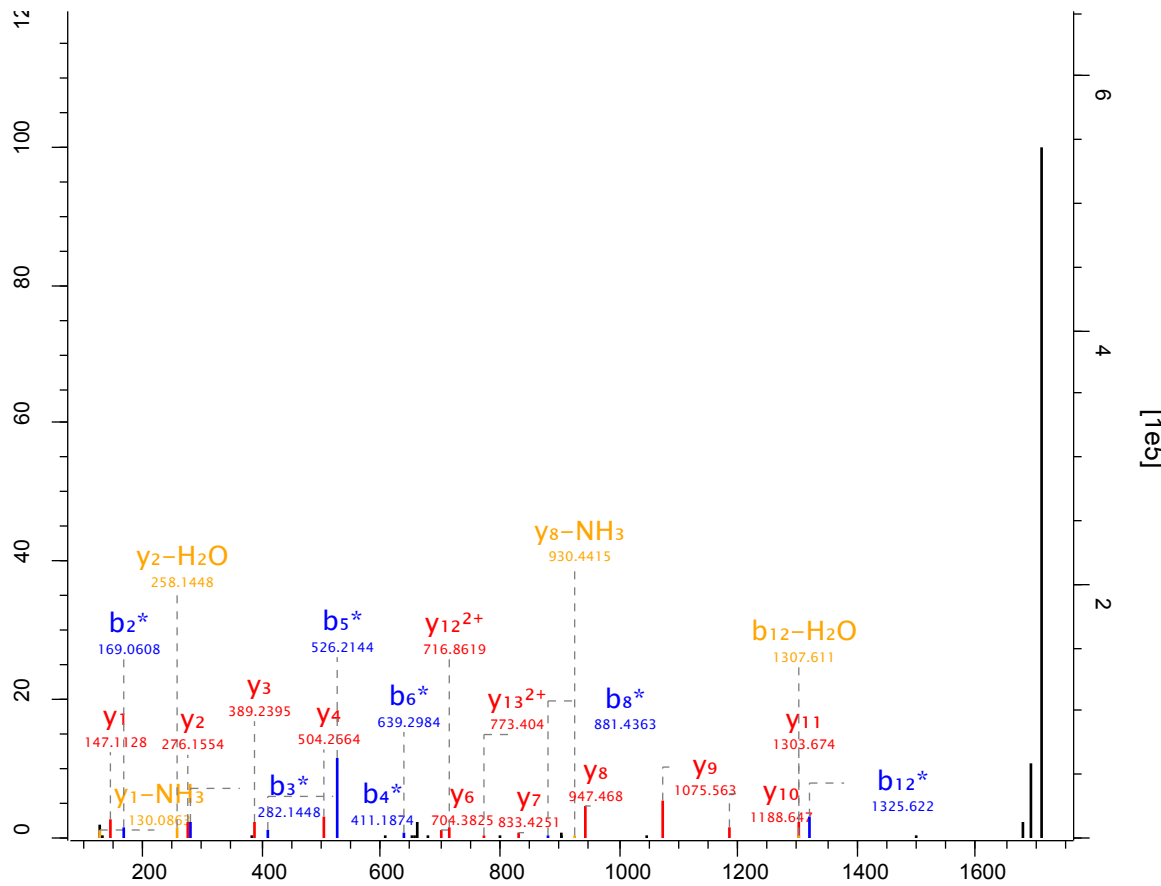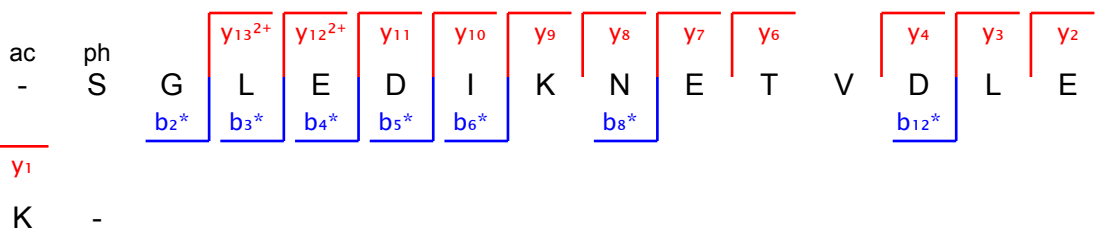

Raw file Scan Method Score m/z  
 2013\_COL15\_30\_34 3043 FTMS; HCD 159 473.21

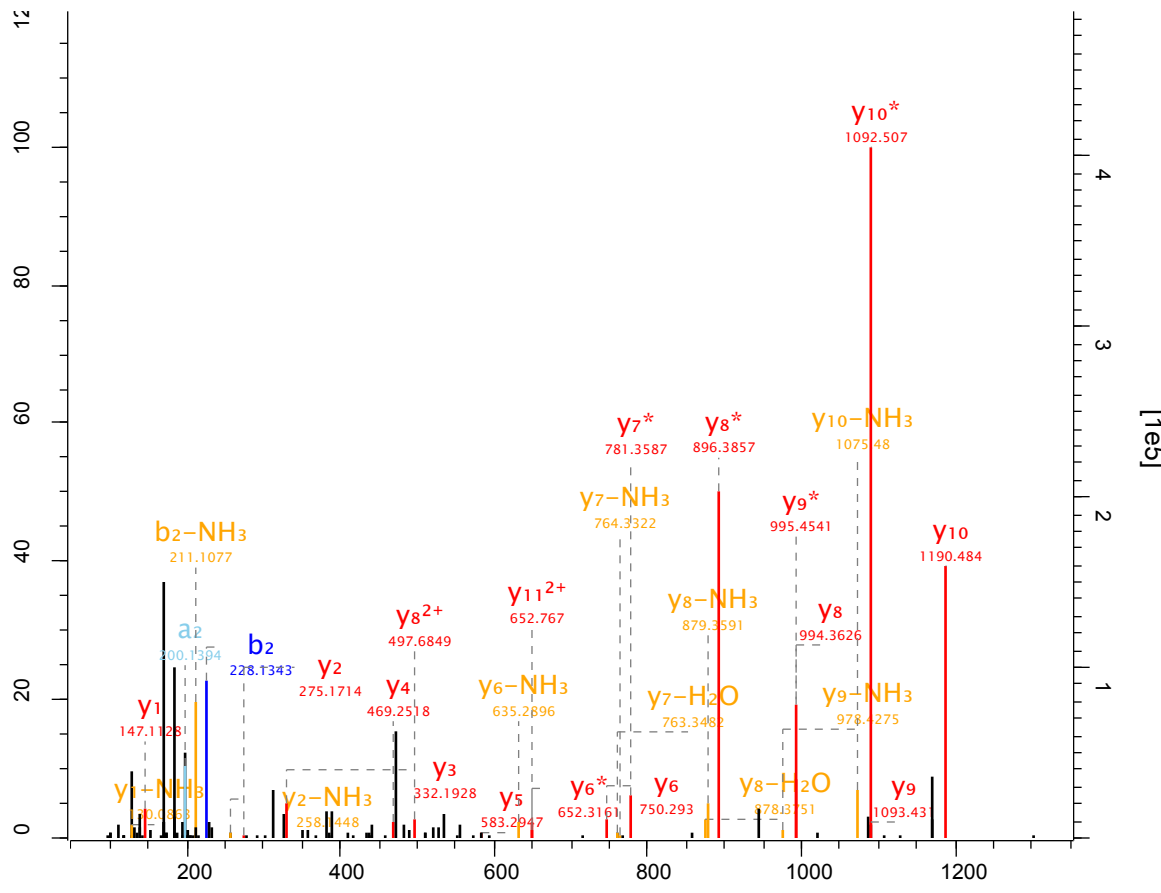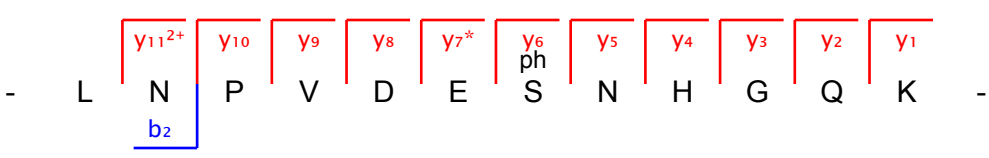

Raw file Scan Method Score m/z  
 2013\_COL15\_30\_34 3052 FTMS; HCD 122.44 613.28

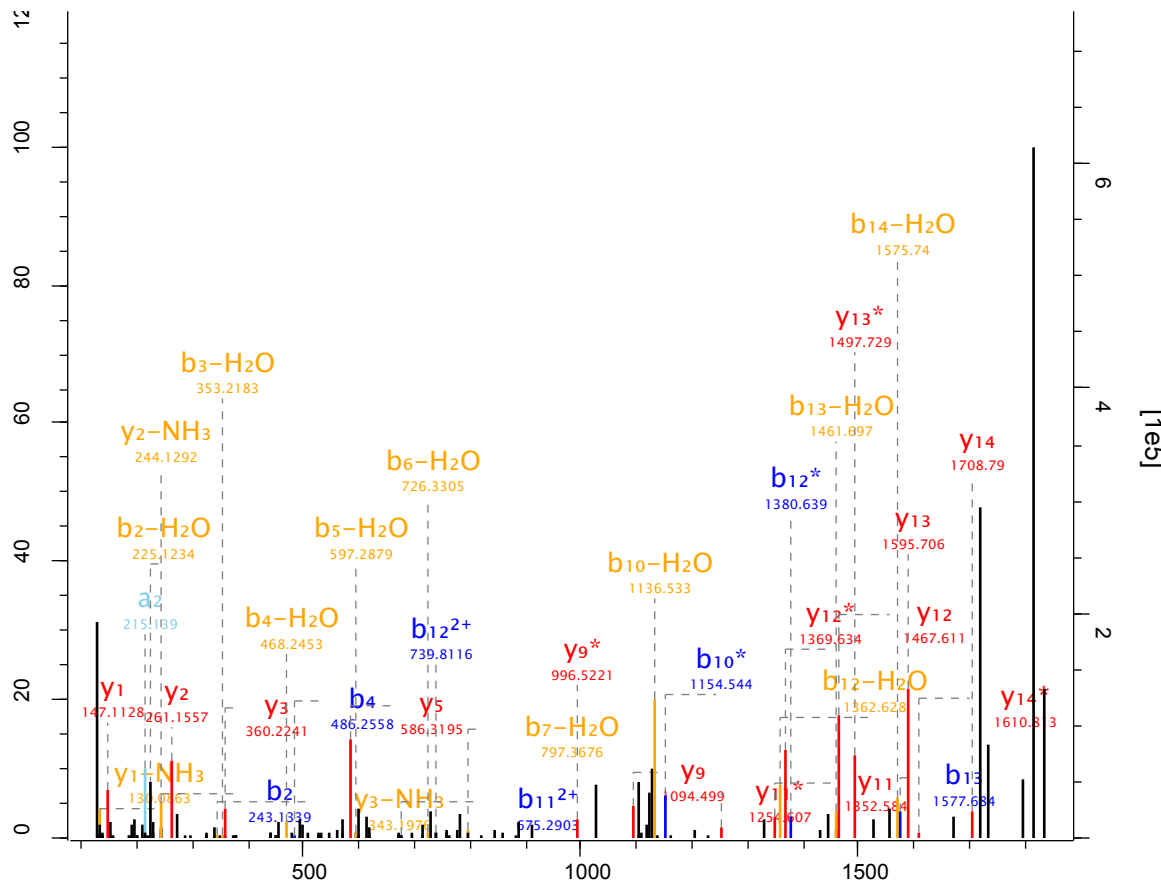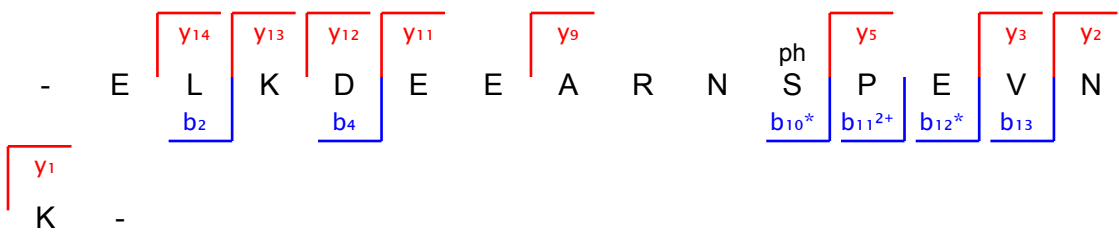

Raw file 2013\_COL15\_30\_34 Scan 30544 Method FTMS; HCD Score 144.8 m/z 625.26

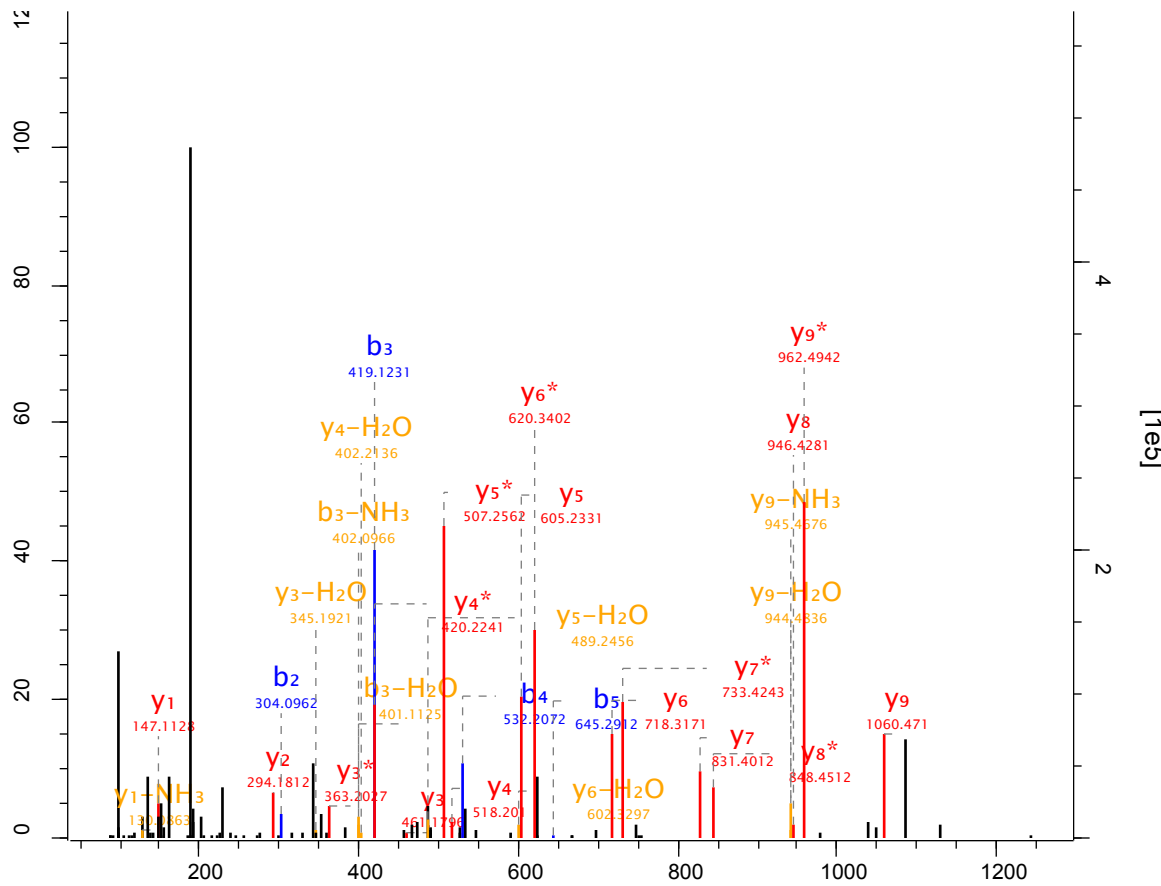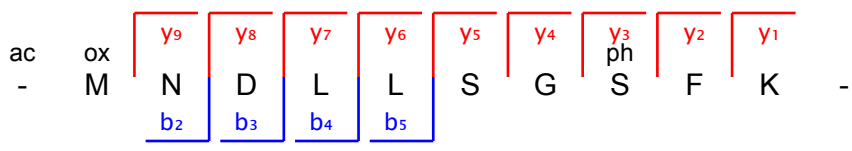

Raw file Scan Method Score m/z  
 2013\_COL15\_30\_34 31156 FTMS; HCD 62.57 901.72

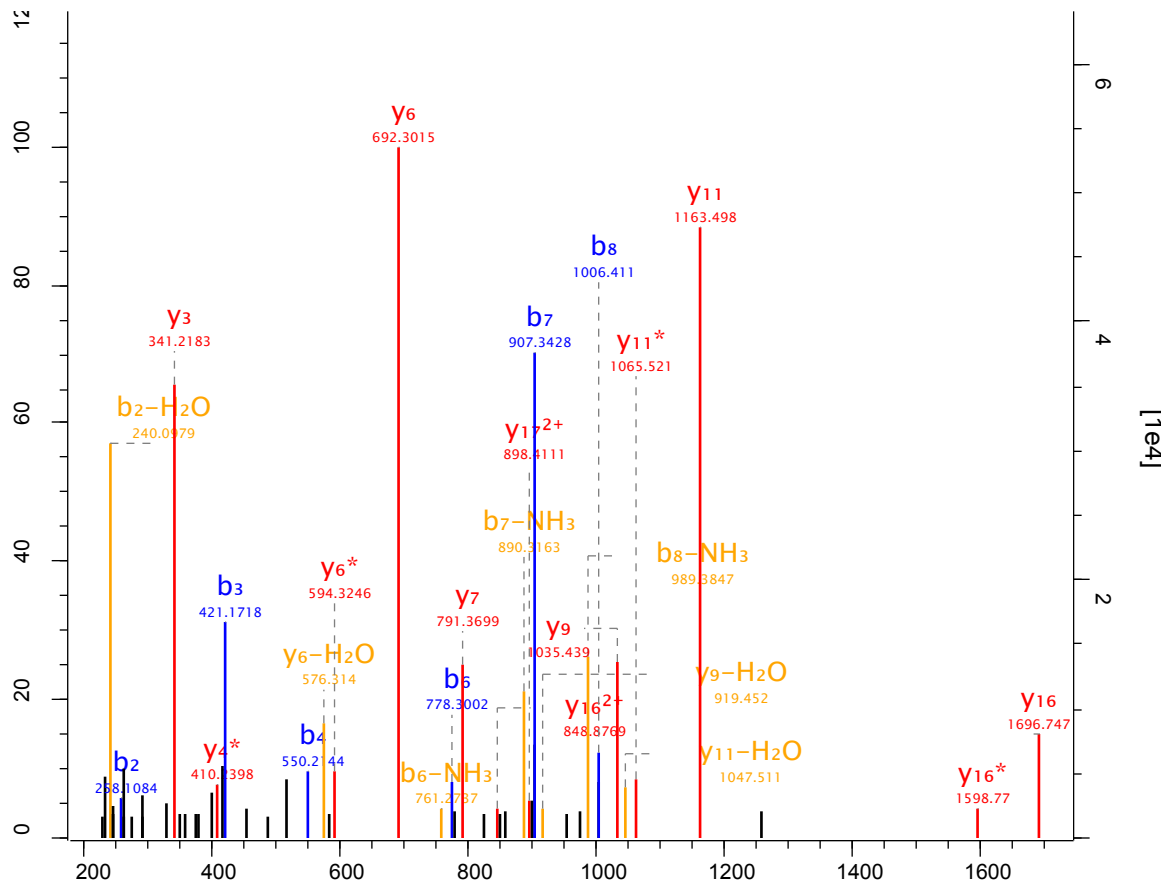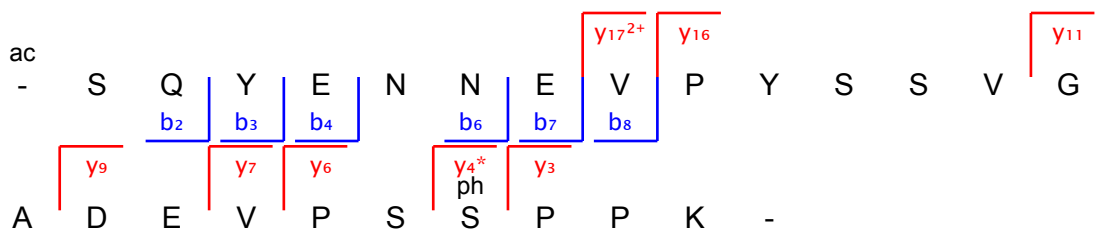

Raw file Scan Method Score m/z  
 2013\_COL15\_30\_34 3141 FTMS; HCD 56.42 547.91

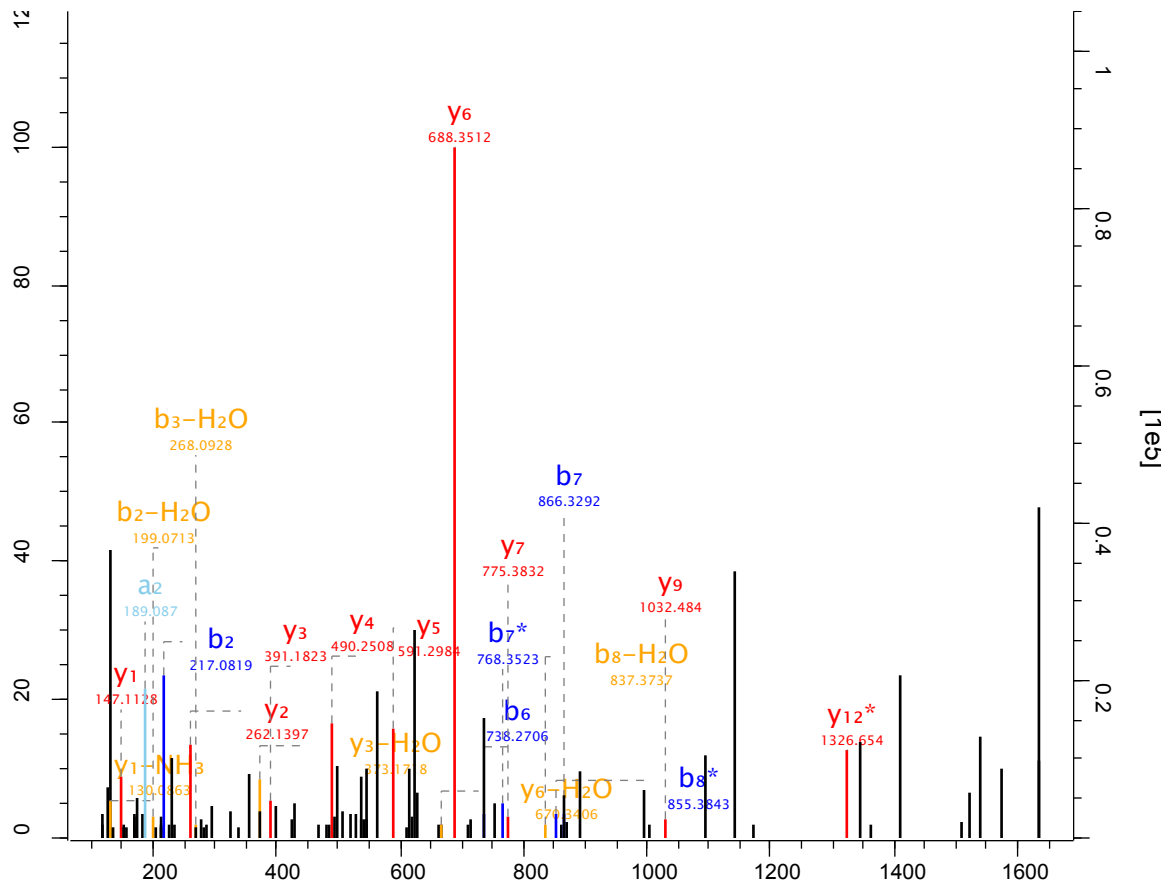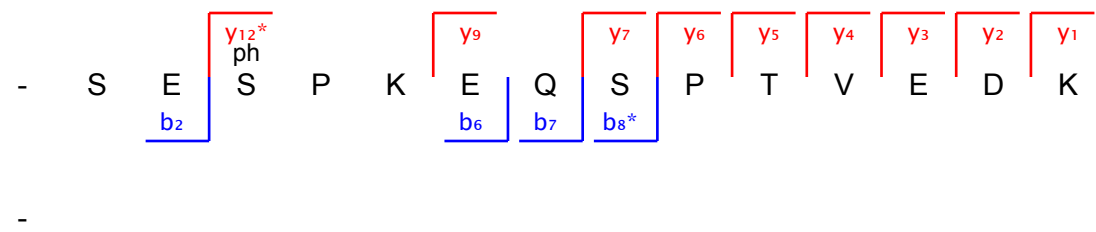

Raw file Scan Method Score m/z  
 2013\_COL15\_30\_34 3154 FTMS; HCD 55.82 479.55

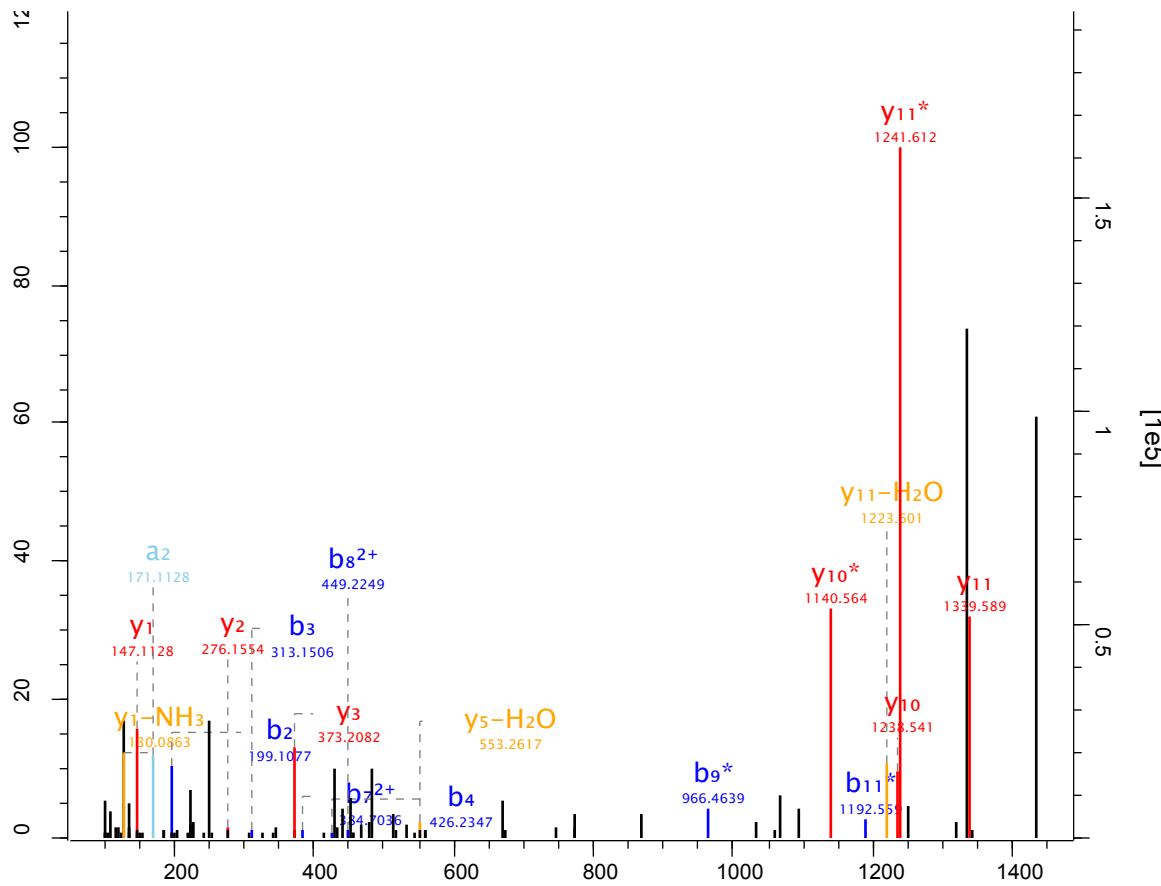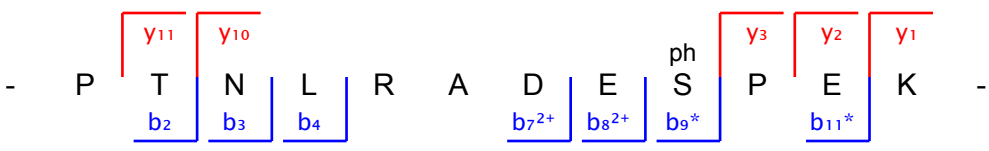

Raw file Scan Method Score m/z  
 2013\_COL15\_30\_34 31543 FTMS; HCD 197.68 1067.48

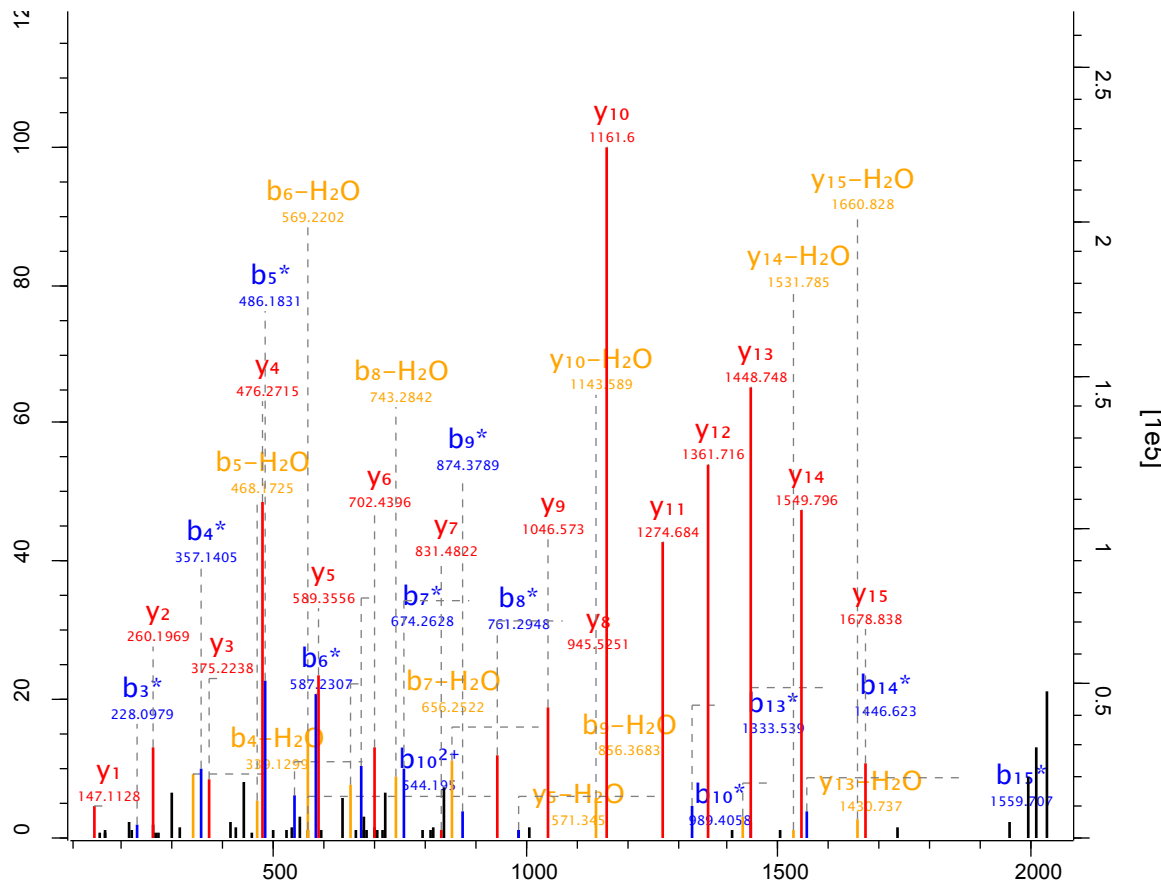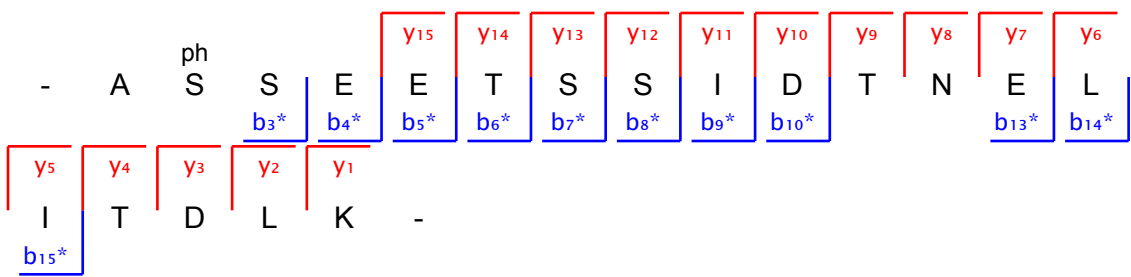





Raw file Scan Method Score m/z  
 2013\_COL15\_30\_34 32005 FTMS; HCD 52.81 771.32

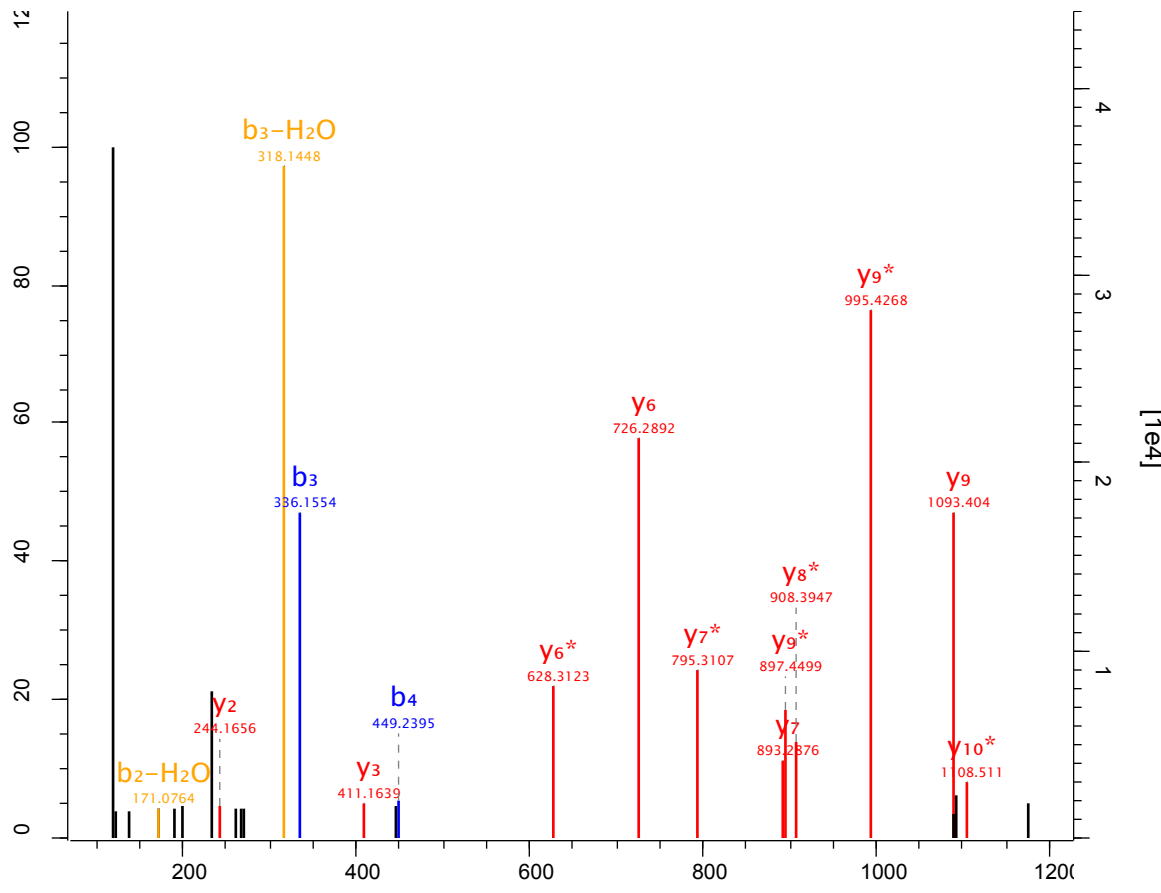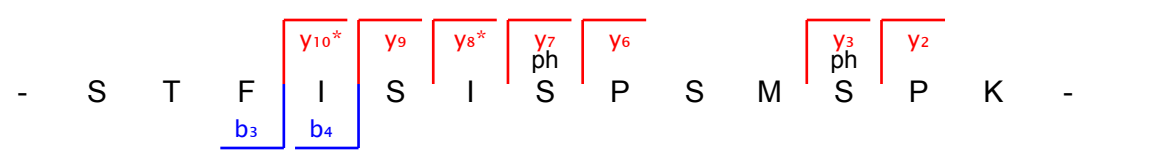

Raw file 2013\_COL15\_30\_34 Scan 3250 Method FTMS; HCD Score 73.92 m/z 578.26

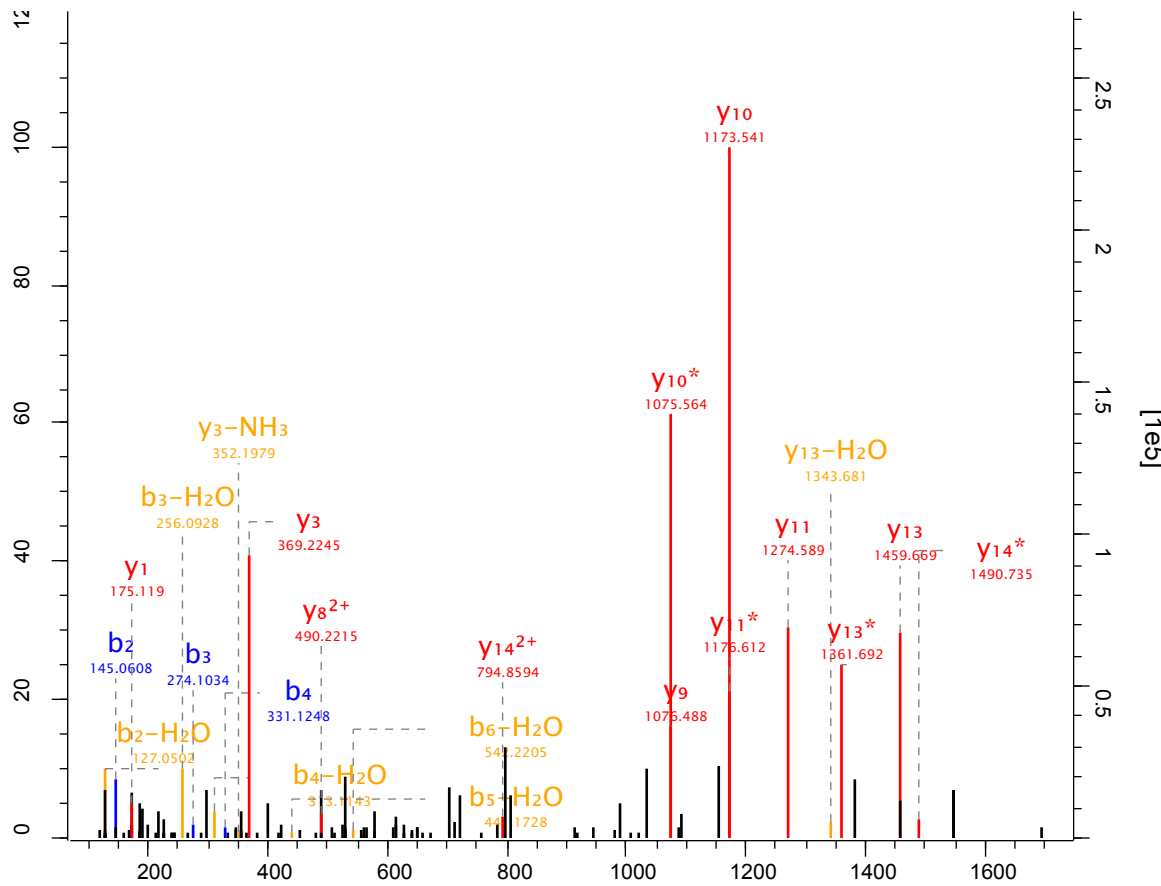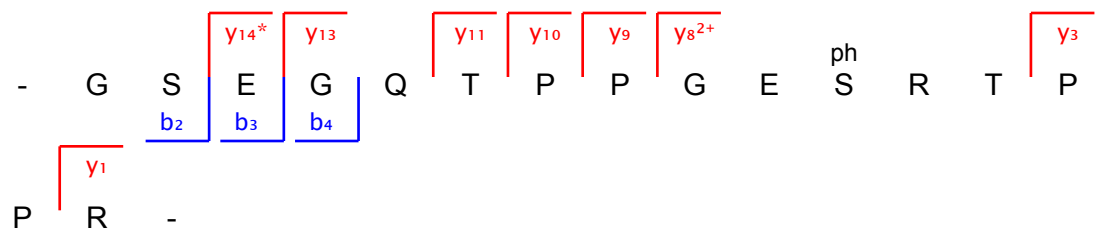

Raw file Scan Method Score m/z  
 2013\_COL15\_30\_34 32557 FTMS; HCD 114.57 818.37

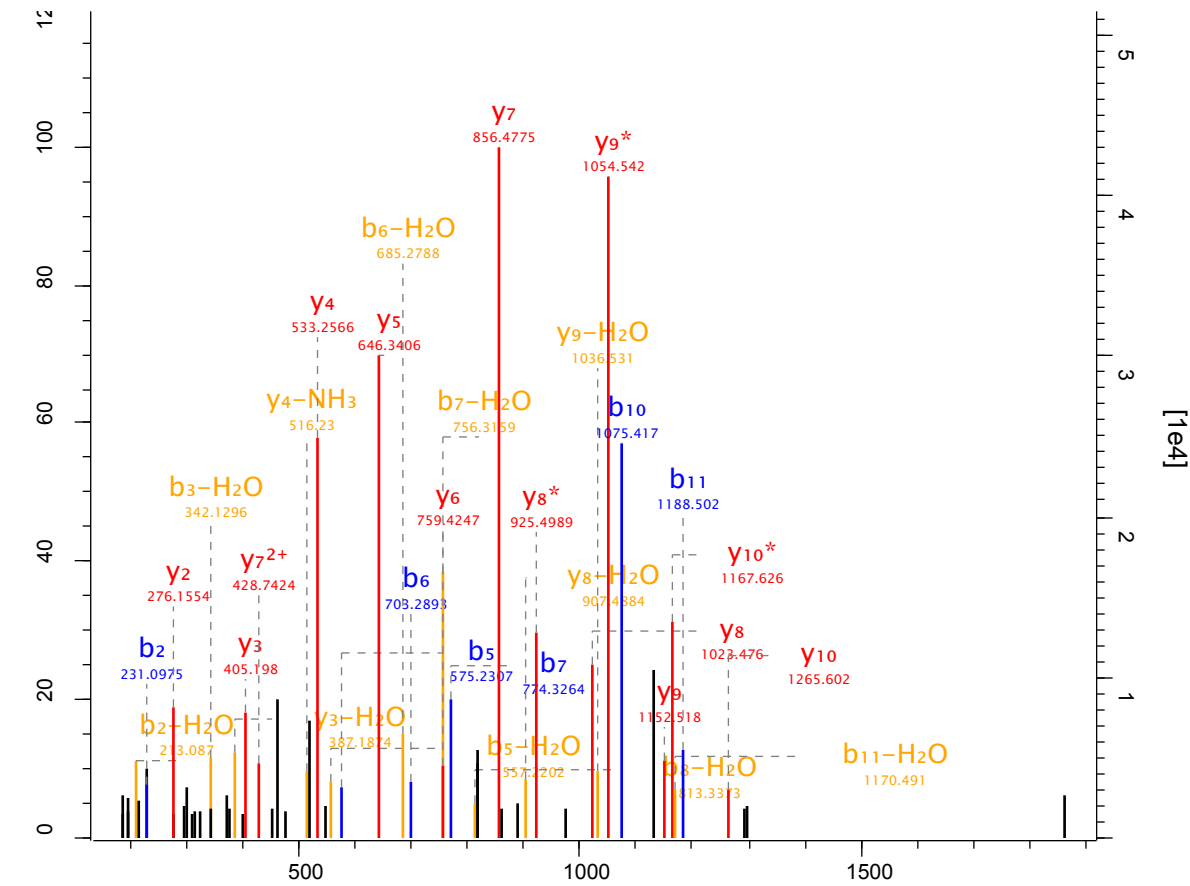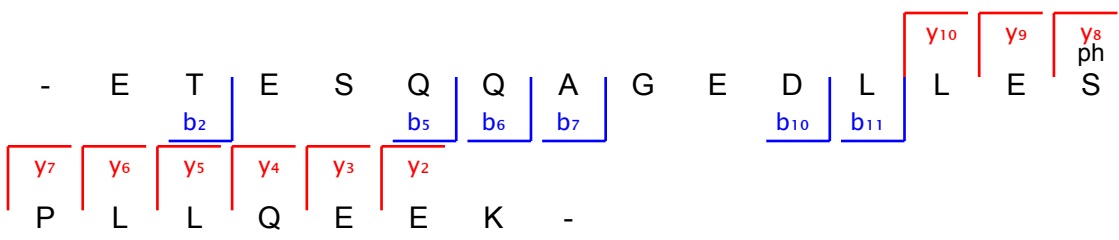

Raw file Scan Method Score m/z  
 2013\_COL15\_30\_34 3277 FTMS; HCD 166.6 693.3

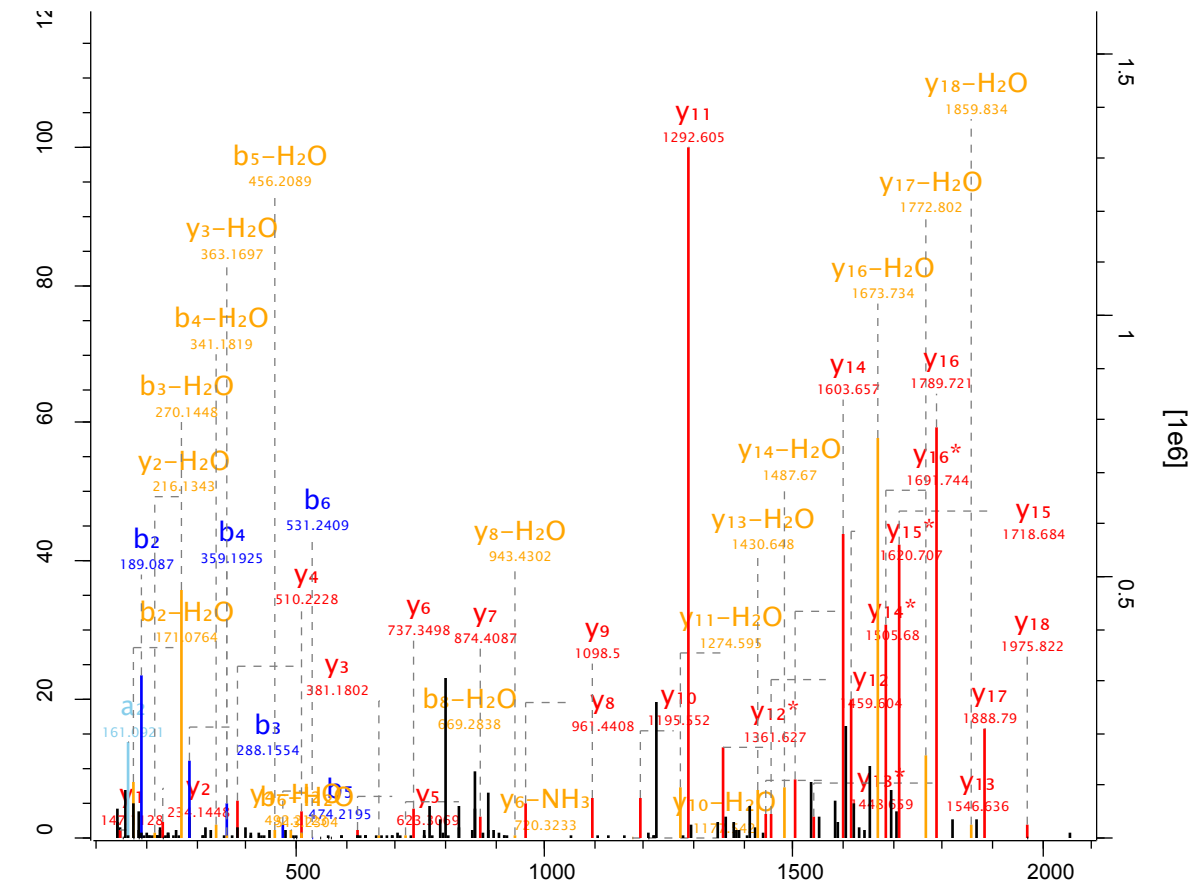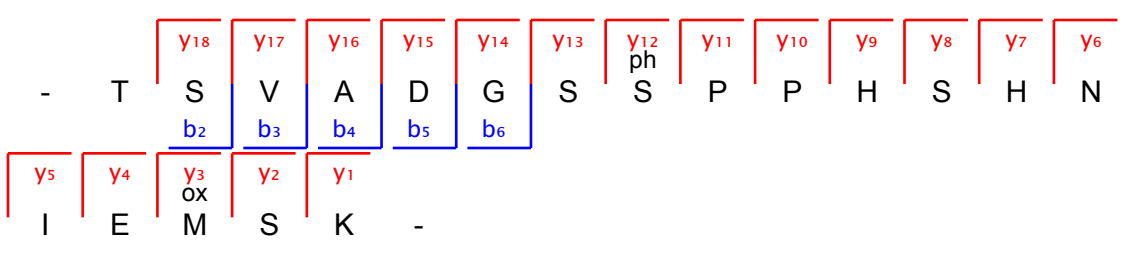

Raw file

Scan

Method

Score

m/z

2013\_COL15\_30\_34

3339

FTMS; HCD

55.26

450.2

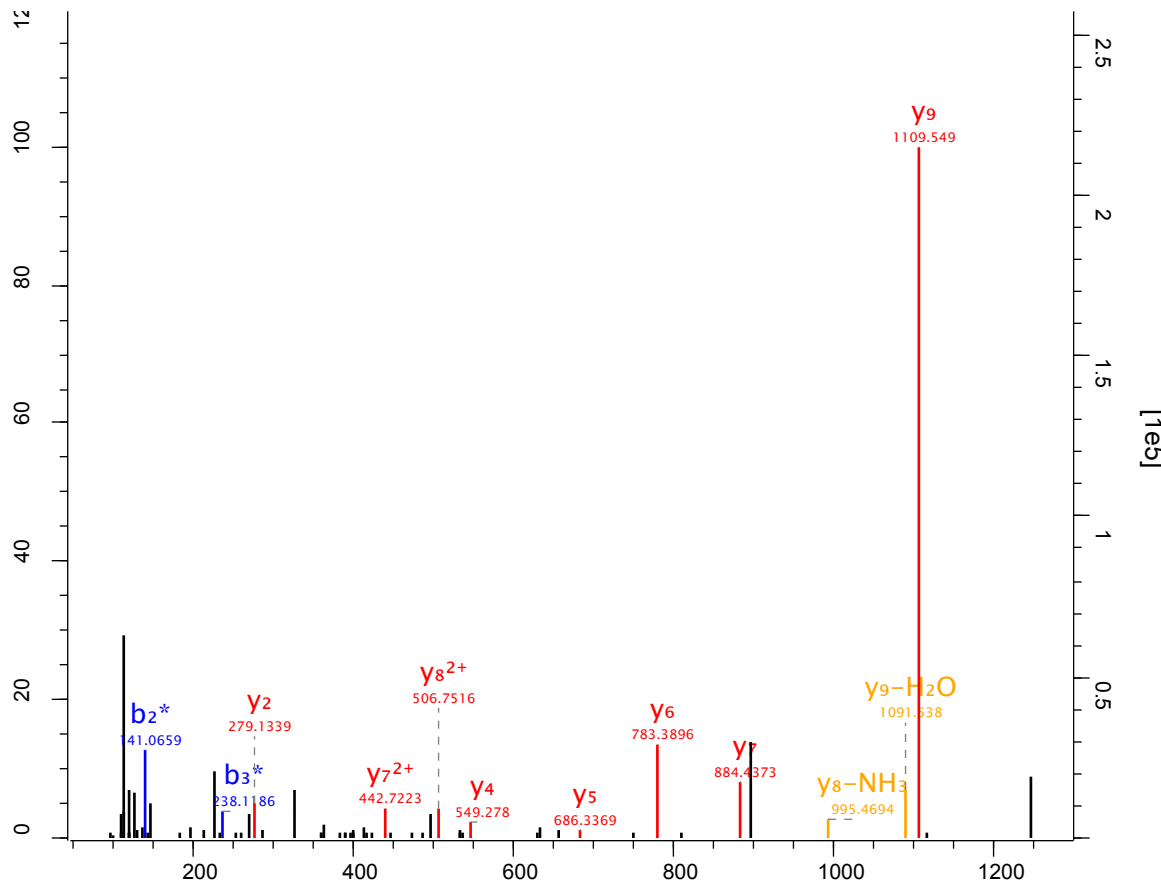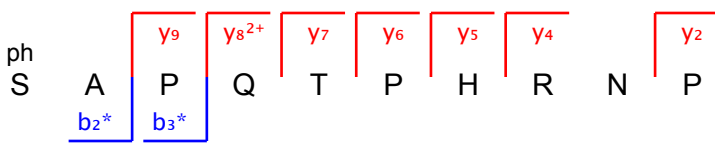

Raw file Scan Method Score m/z  
 2013\_COL15\_30\_34 3484 FTMS; HCD 77.87 618.9

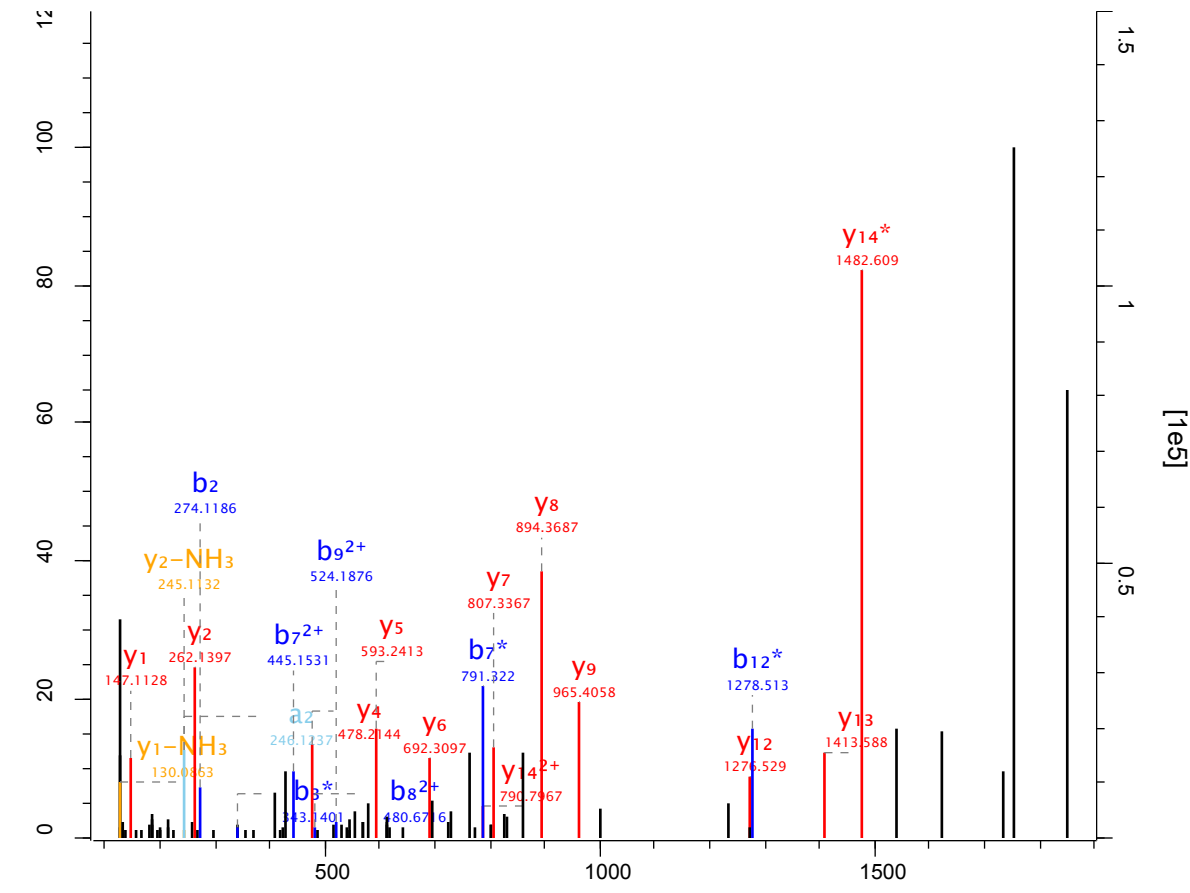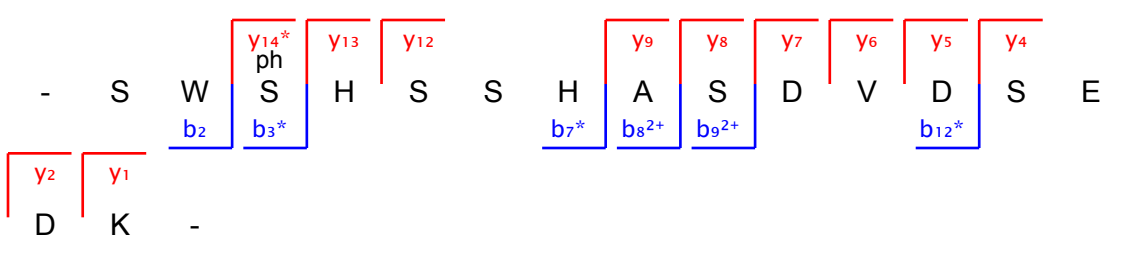

Raw file Scan Method Score m/z  
 2013\_COL15\_30\_34 35339 FTMS; HCD 53.3 671.3

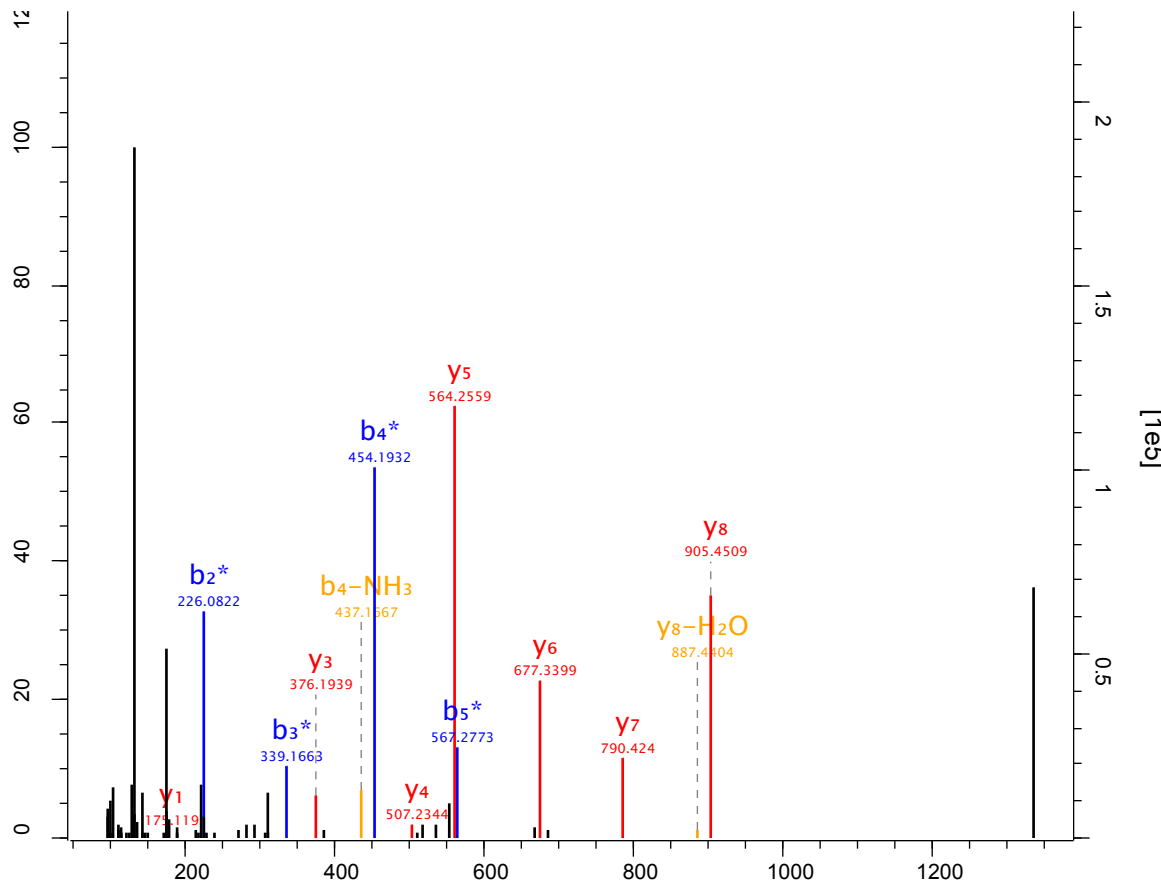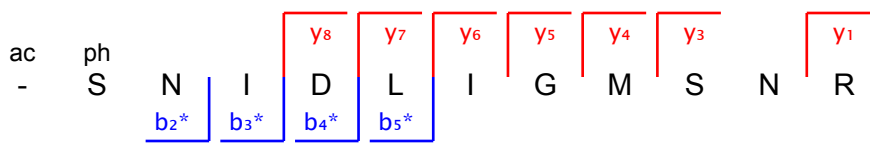



| Raw file         | Scan | Method    | Score | m/z    |
|------------------|------|-----------|-------|--------|
| 2013_COL15_30_34 | 3588 | FTMS; HCD | 68.68 | 506.73 |

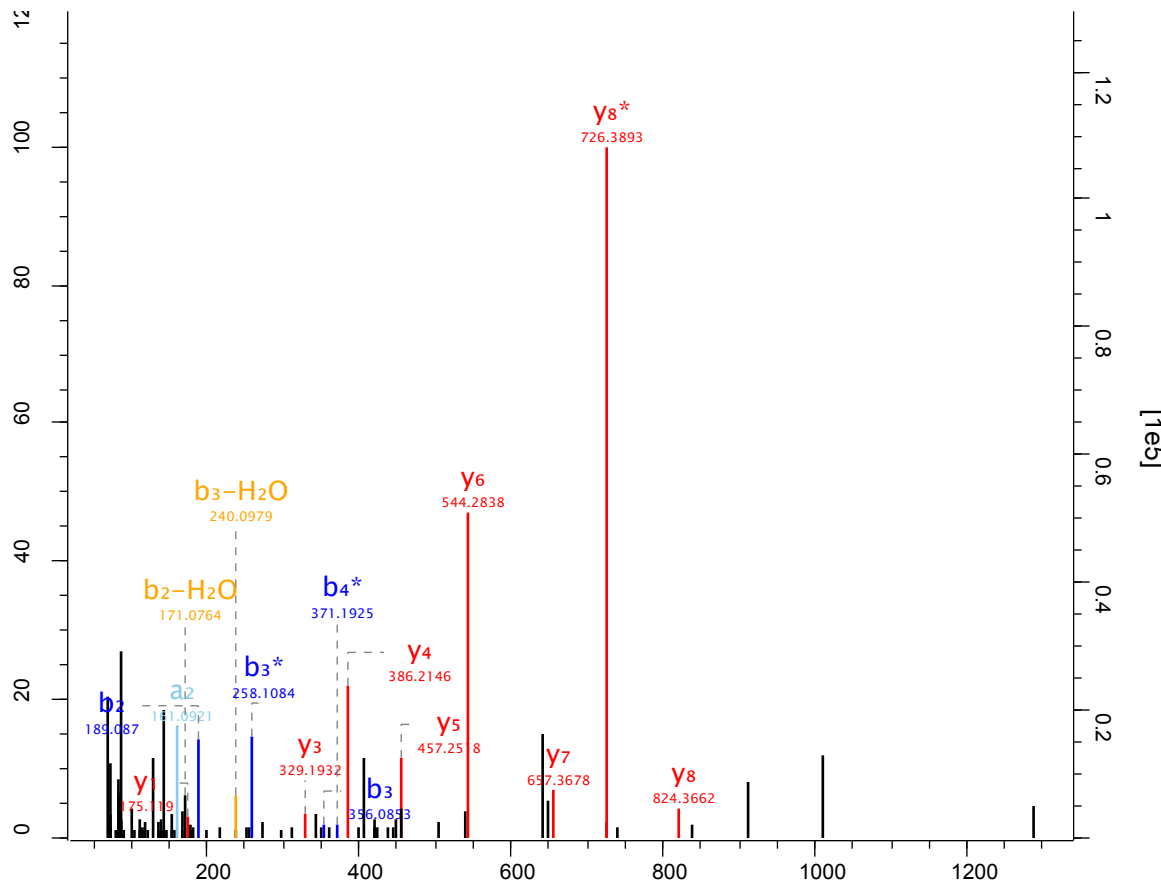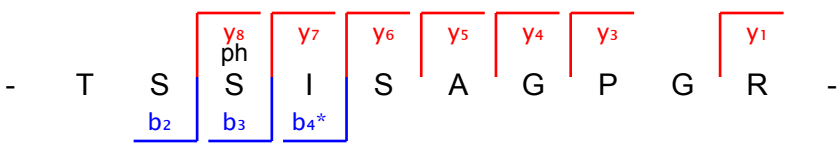

Raw file Scan Method Score m/z  
 2013\_COL15\_30\_34 3597 FTMS; HCD 48.22 587.91

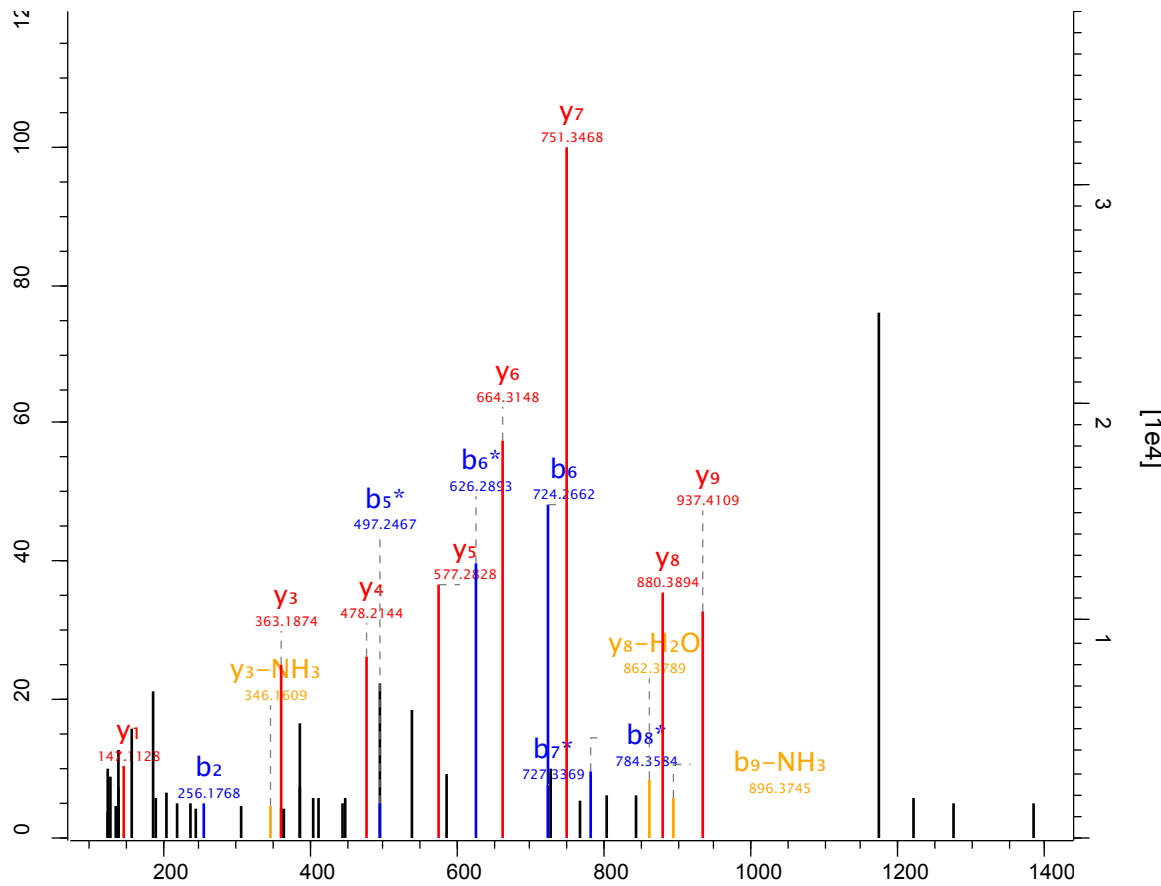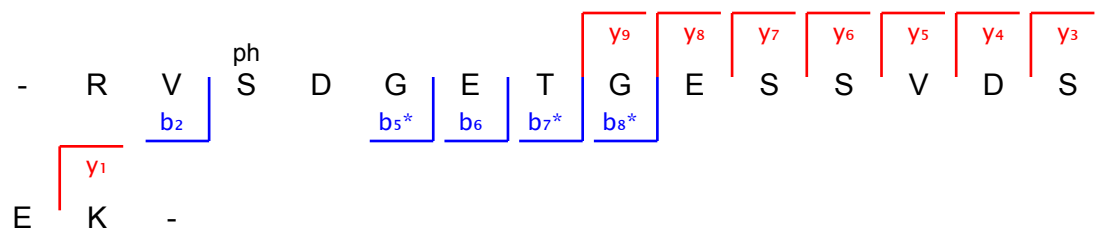

Raw file Scan Method Score m/z  
 2013\_COL15\_30\_34 38168 FTMS; HCD 153.23 810.03

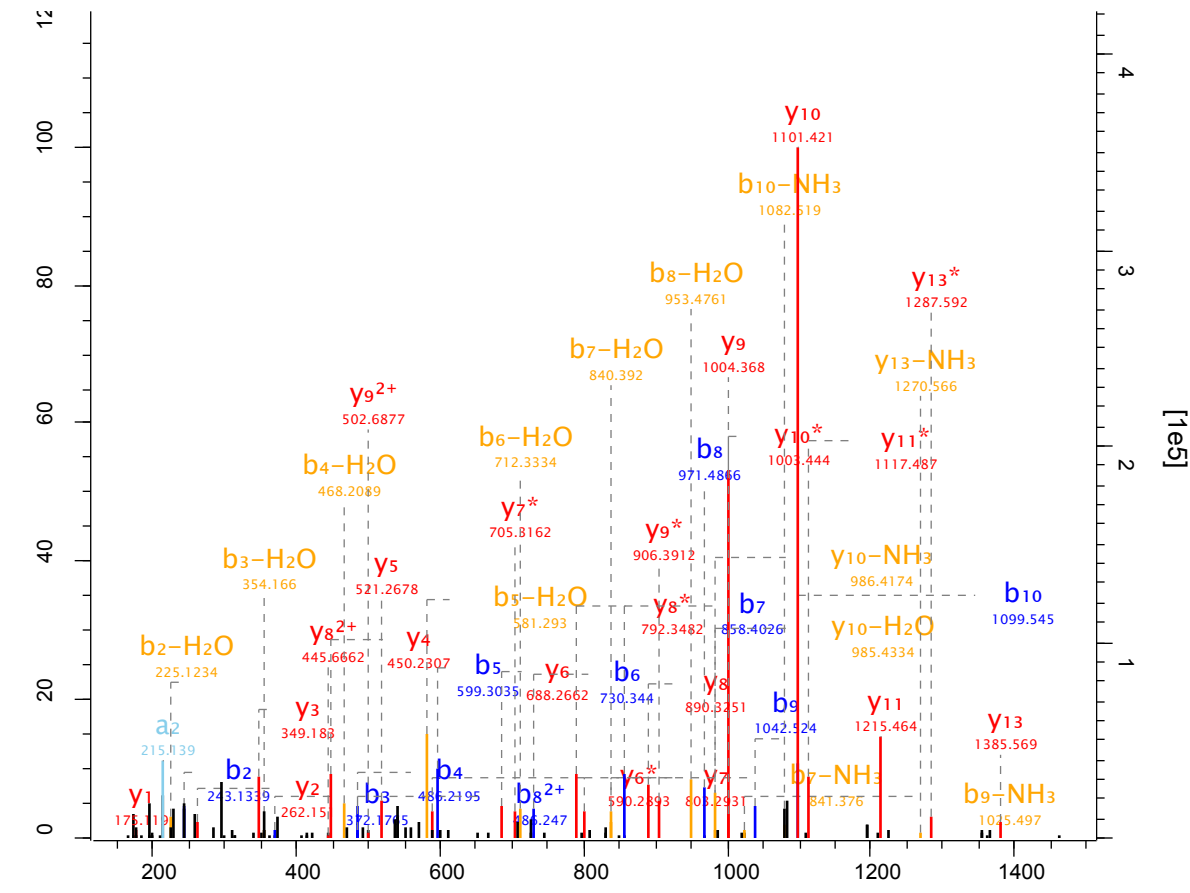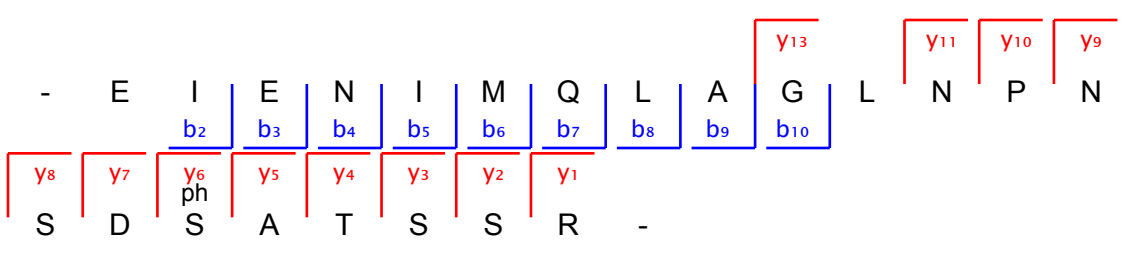

Raw file Scan Method Score m/z  
 2013\_COL15\_30\_34 4088 FTMS; HCD 112.44 562.25

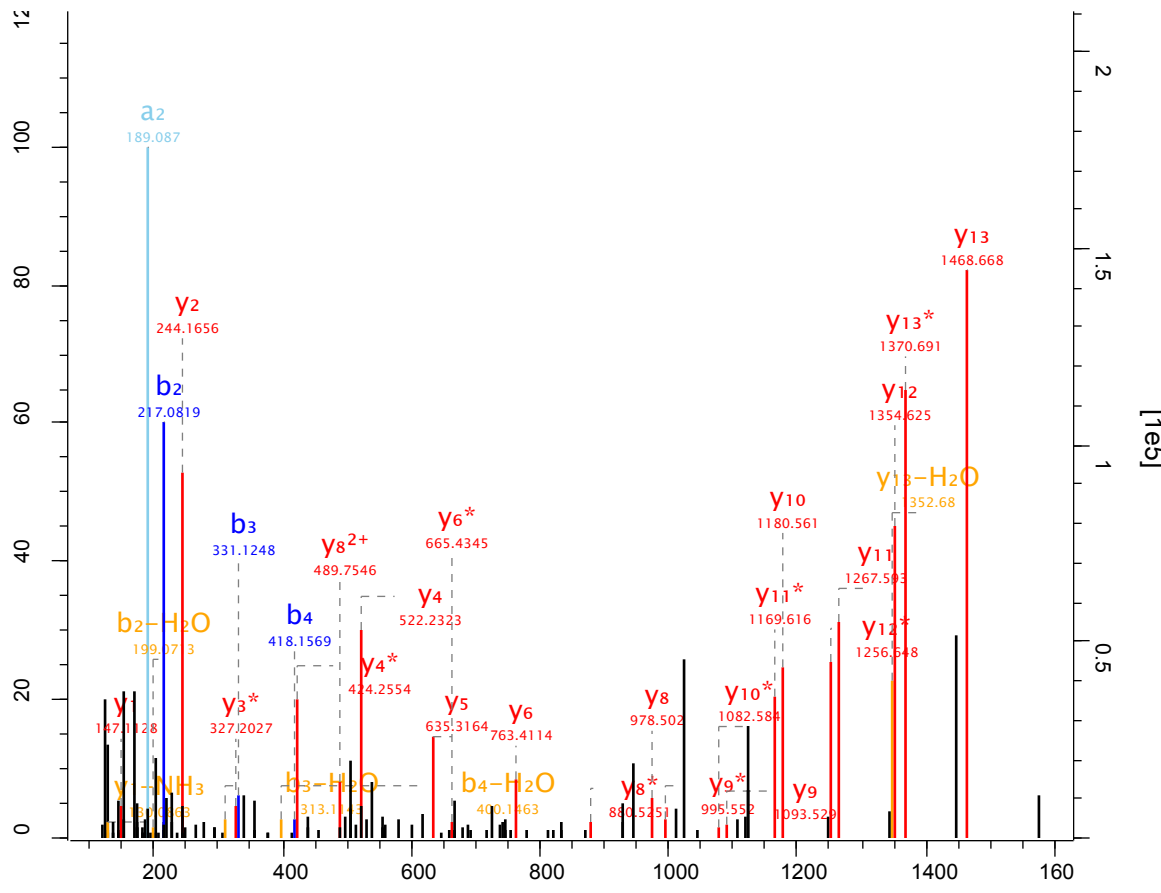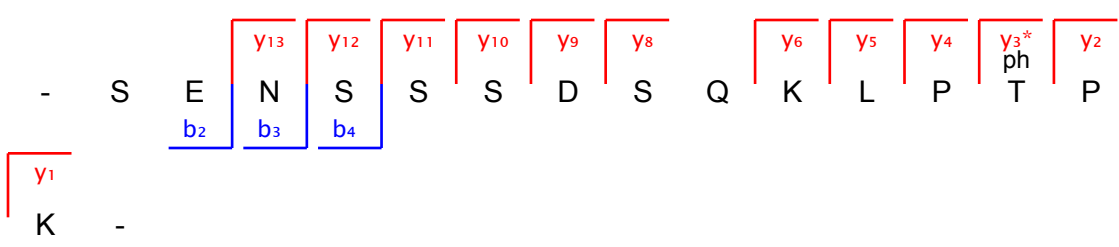

Raw file Scan Method Score m/z  
 2013\_COL15\_30\_34 4090 FTMS; HCD 68.41 532.92

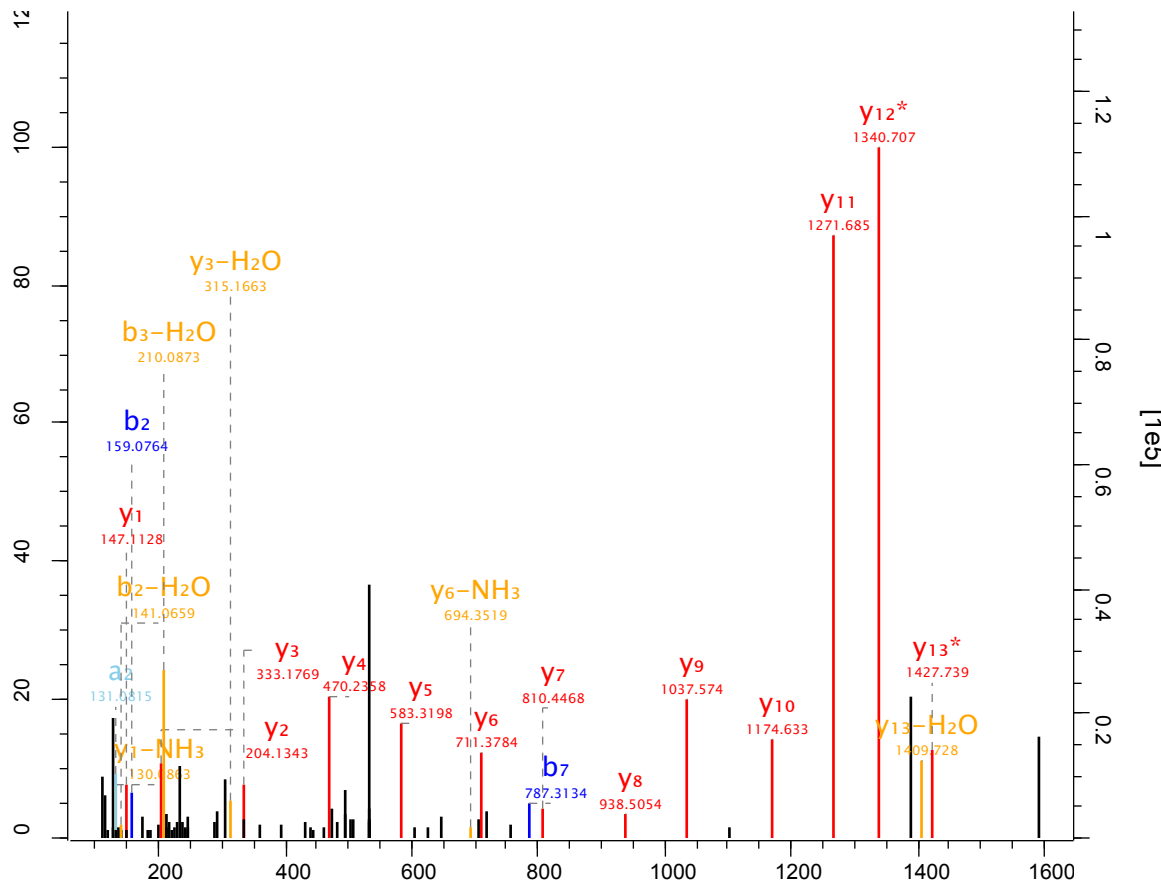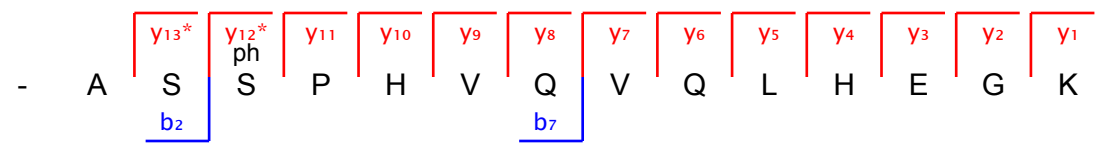

| Raw file         | Scan | Method    | Score | m/z    |
|------------------|------|-----------|-------|--------|
| 2013_COL15_30_34 | 4106 | FTMS; HCD | 51.77 | 475.21 |

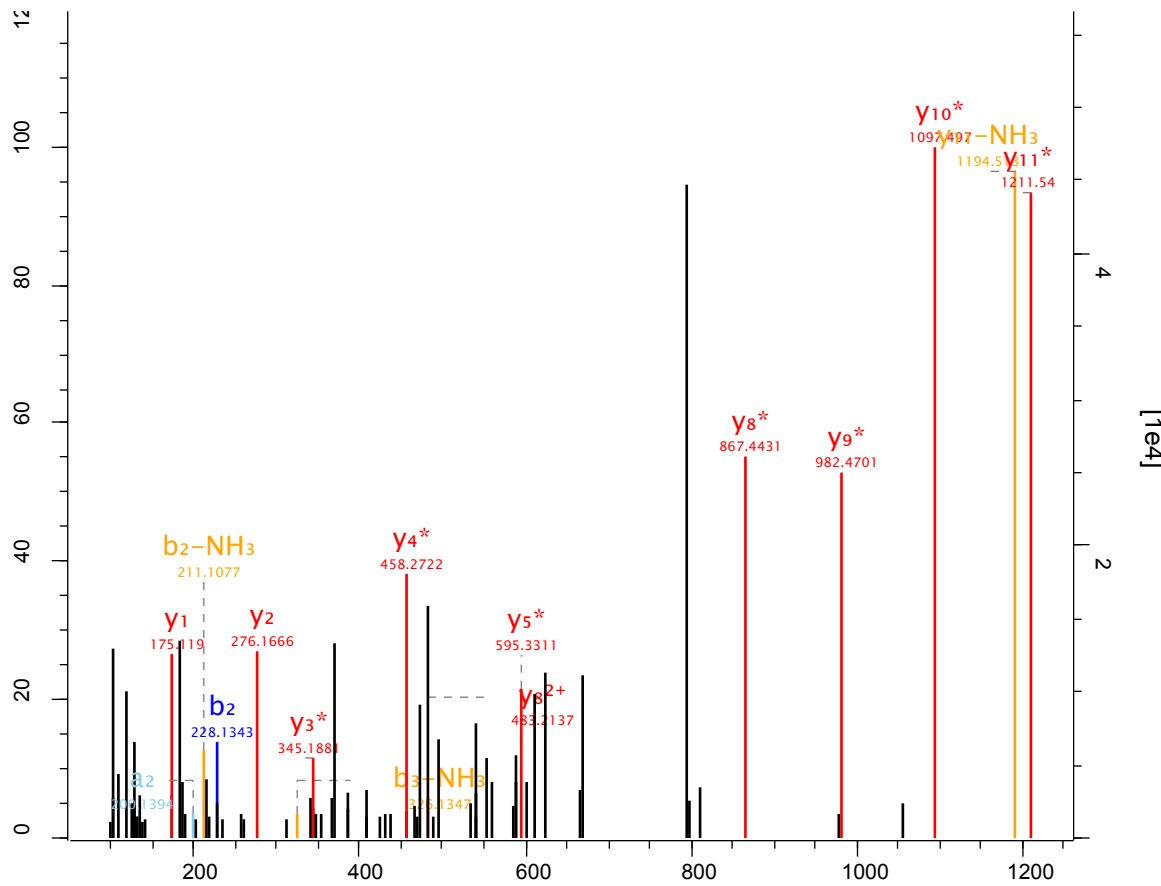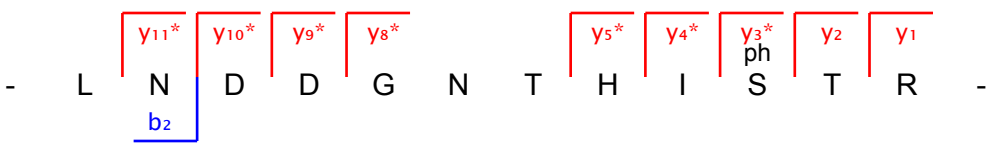

| Raw file         | Scan | Method    | Score | m/z    |
|------------------|------|-----------|-------|--------|
| 2013_COL15_30_34 | 4314 | FTMS; HCD | 45.21 | 458.49 |

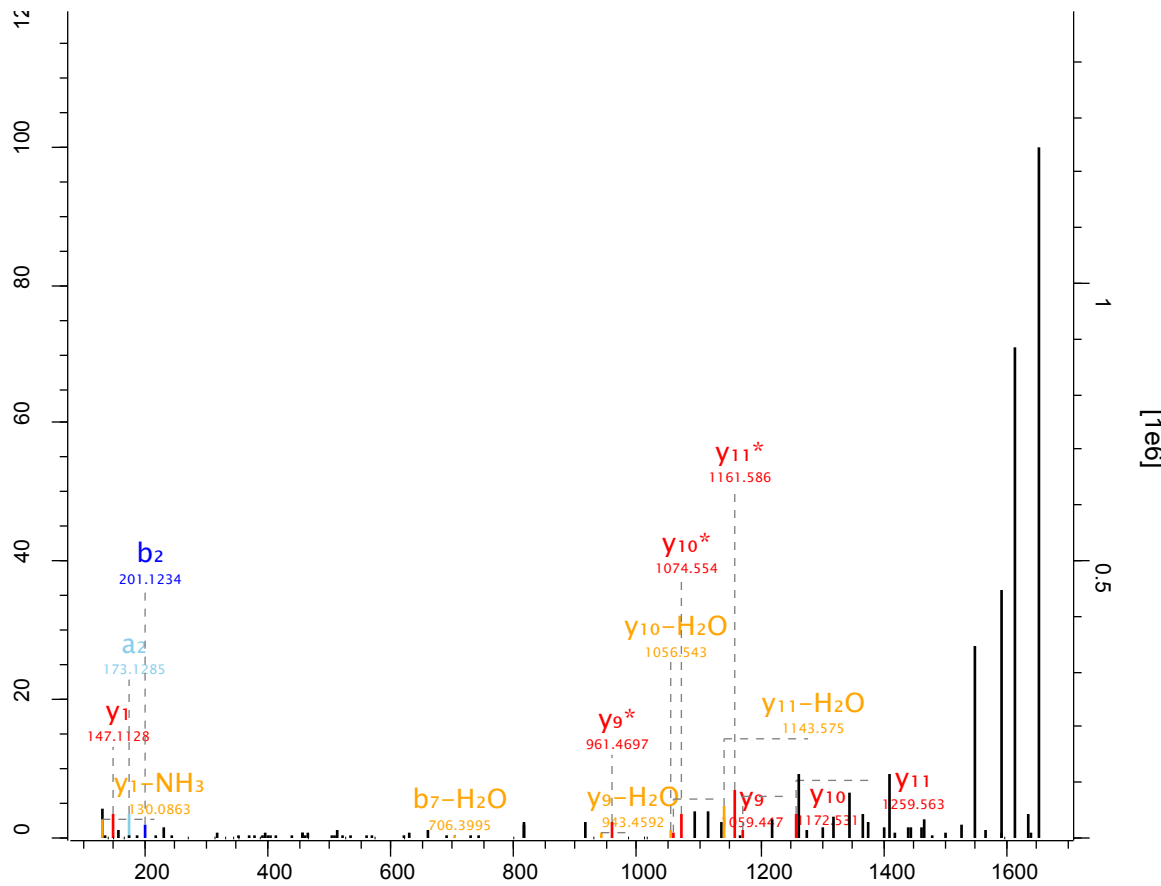

- I S L S A N R T S T D K -

Annotations:   
 - Red boxes above S, L, S, D, K: y11, y10, y9 ph, y1   
 - Blue box below S, L: b2

Raw file Scan Method Score m/z  
 2013\_COL15\_30\_34 4397 FTMS; HCD 145.23 539.77

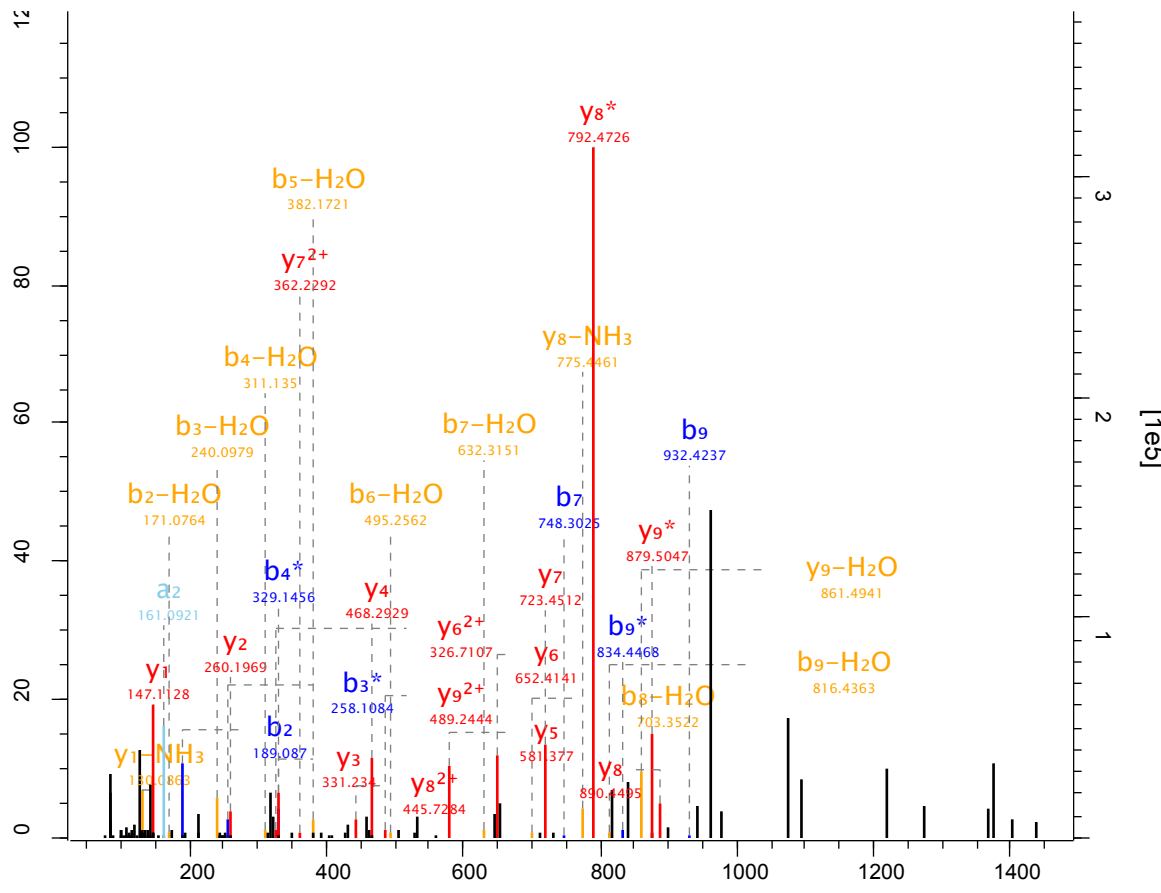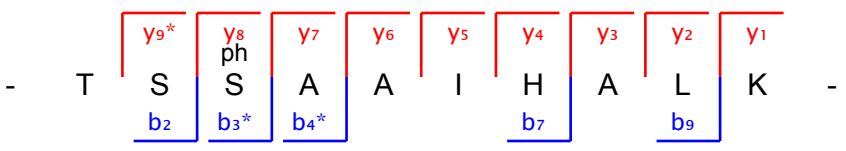



| Raw file         | Scan | Method    | Score | m/z    |
|------------------|------|-----------|-------|--------|
| 2013_COL15_30_34 | 4697 | FTMS; HCD | 85.52 | 574.73 |

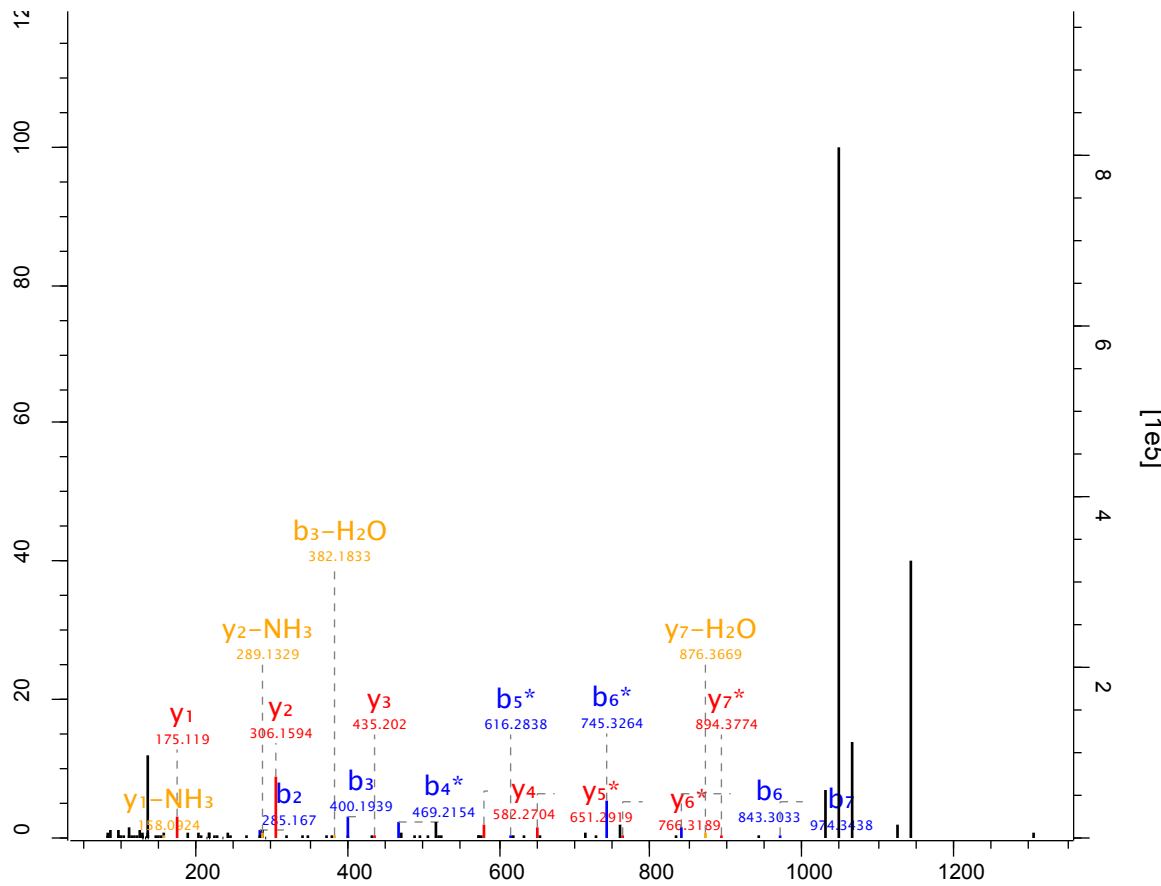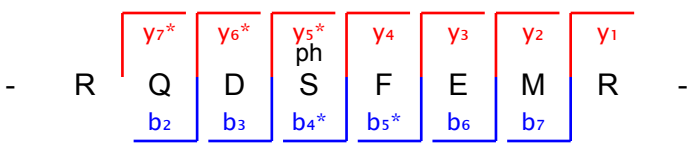

Raw file Scan Method Score m/z  
 2013\_COL15\_30\_34 4710 FTMS; HCD 136.81 498.88

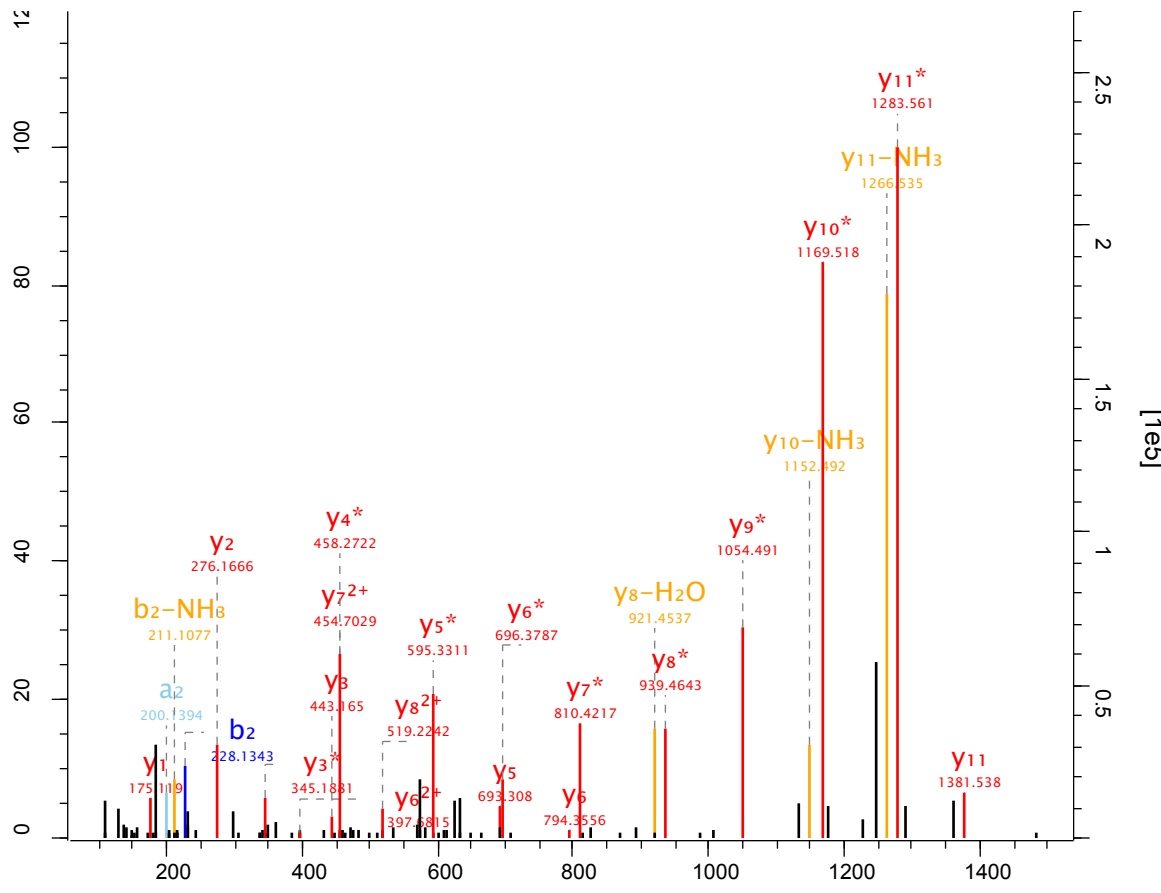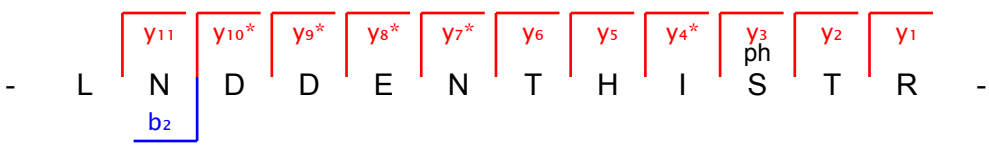

Raw file

Scan

Method

Score

m/z

2013\_COL15\_30\_34

4740

FTMS; HCD

92.8

528.9

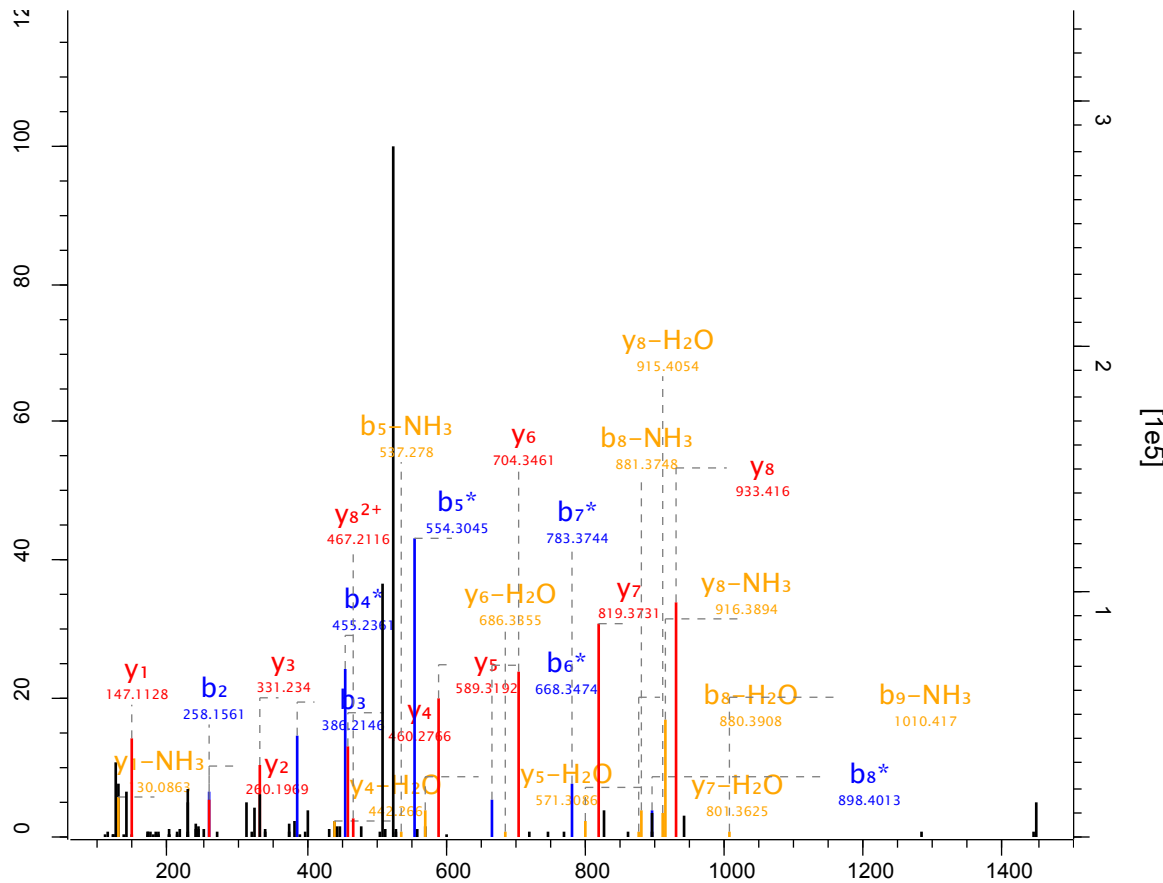

- R T Q S V N D D E E A L K -

ph

b<sub>2</sub> b<sub>3</sub> b<sub>4</sub><sup>\*</sup> b<sub>5</sub><sup>\*</sup> b<sub>6</sub><sup>\*</sup> b<sub>7</sub><sup>\*</sup> b<sub>8</sub><sup>\*</sup> y<sub>8</sub> y<sub>7</sub> y<sub>6</sub> y<sub>5</sub> y<sub>4</sub> y<sub>3</sub> y<sub>2</sub> y<sub>1</sub>

Raw file Scan Method Score m/z  
 2013\_COL15\_30\_34 4948 FTMS; HCD 131.42 507.72

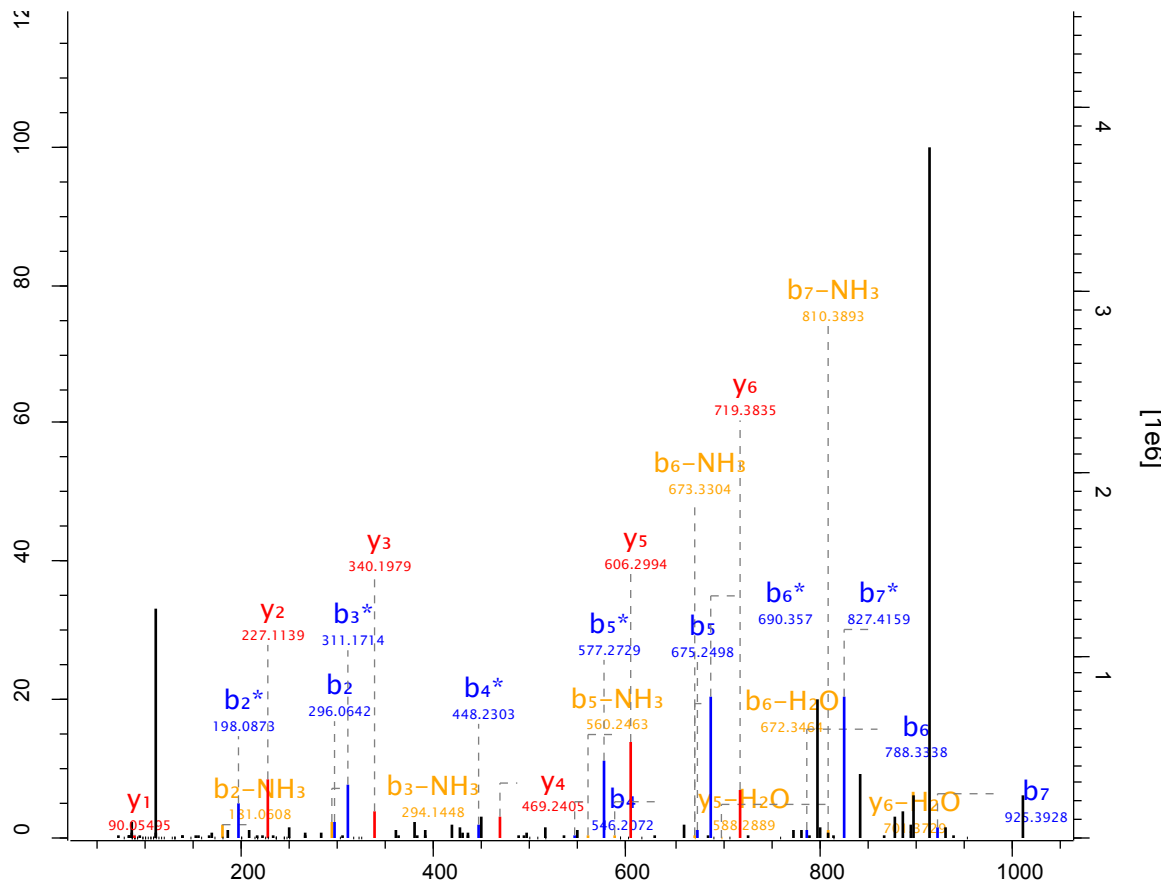

ph  
S

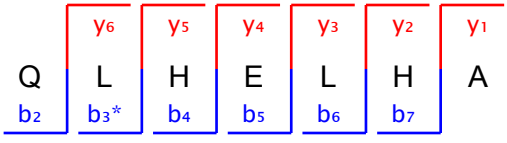



Raw file Scan Method Score m/z  
 2013\_COL15\_30\_34 5367 FTMS; HCD 71.03 577.89

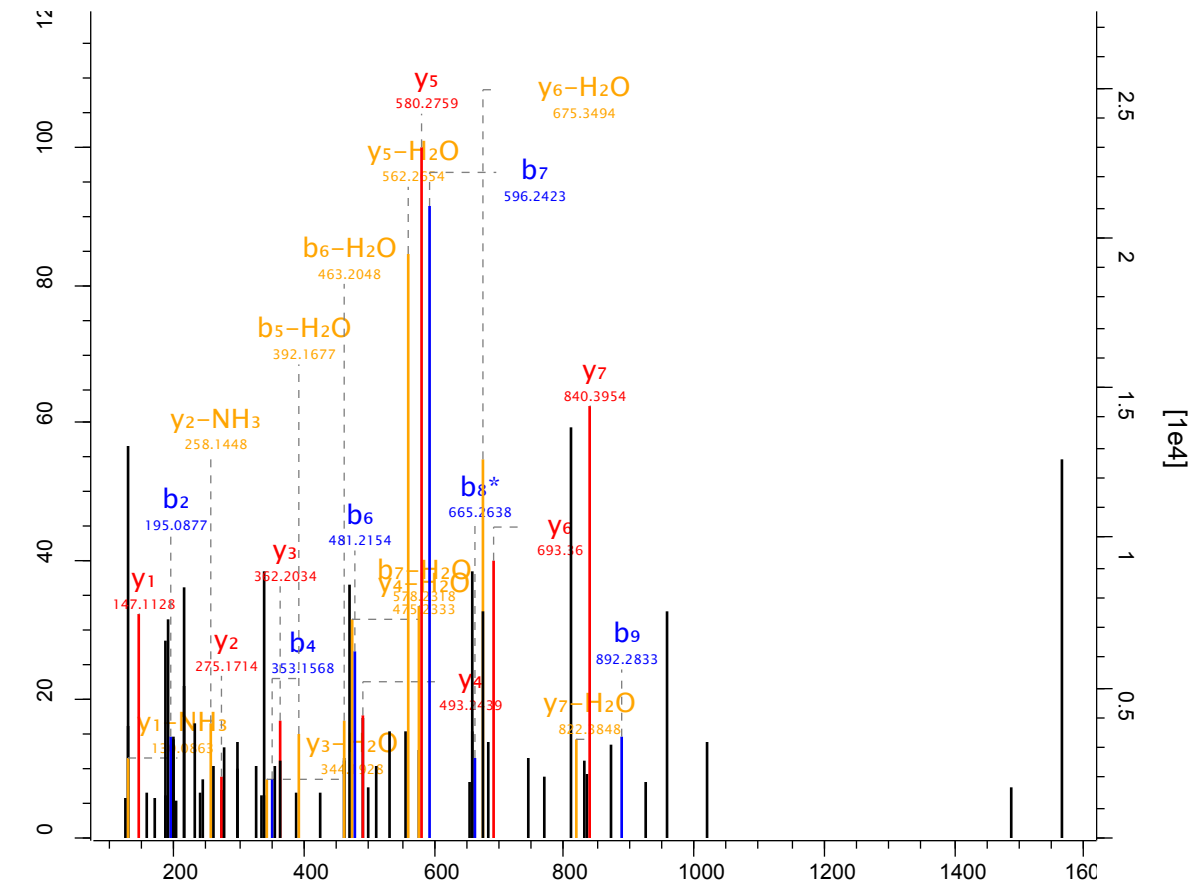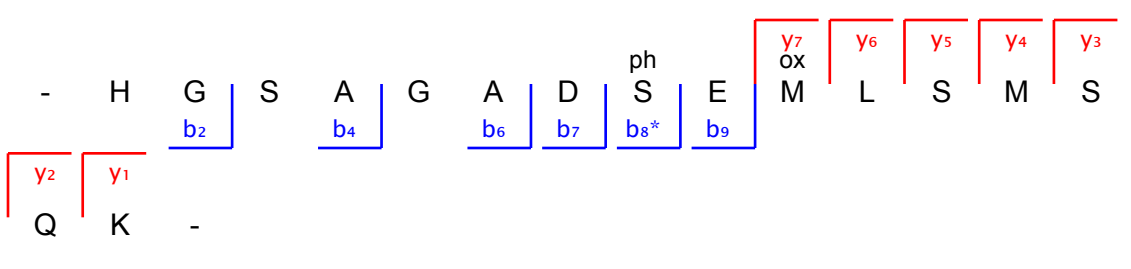

Raw file 2013\_COL15\_30\_34 Scan 5457 Method FTMS; HCD Score 98.21 m/z 671.92

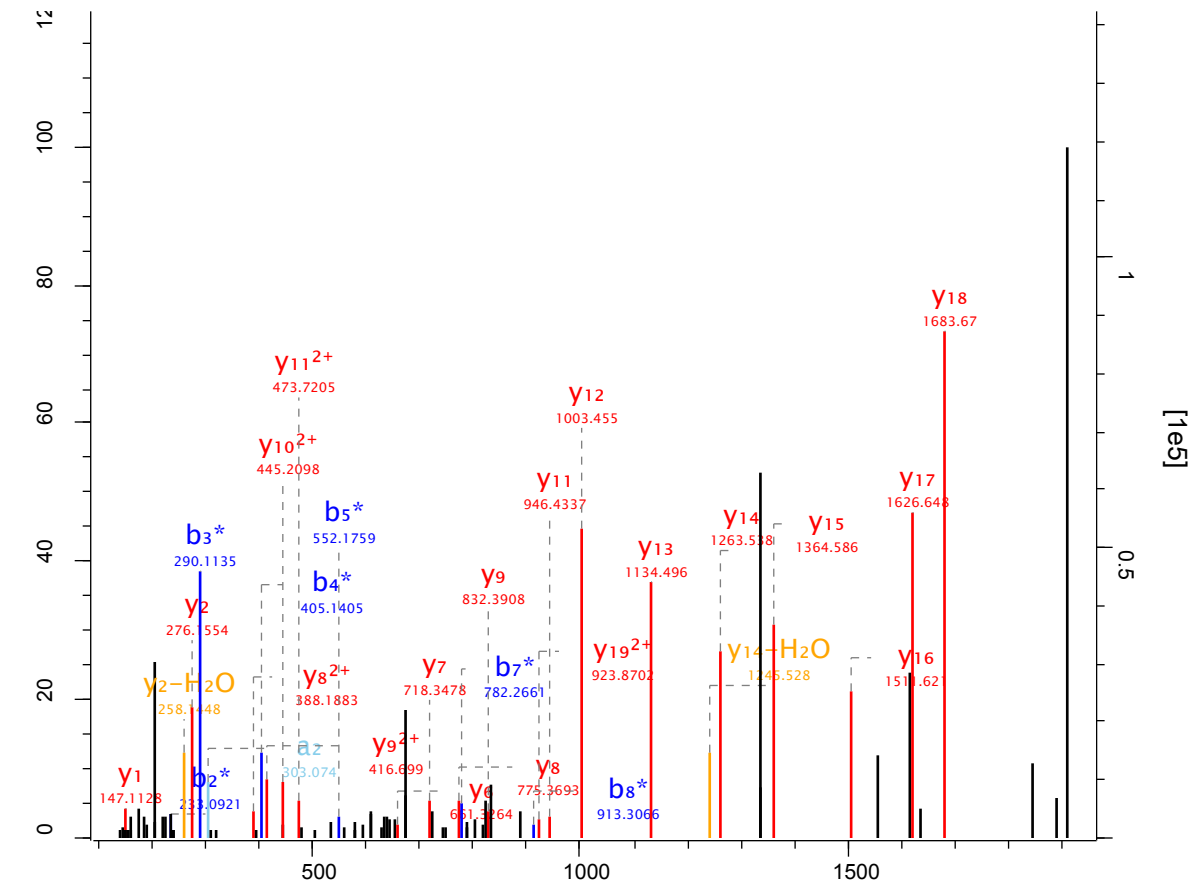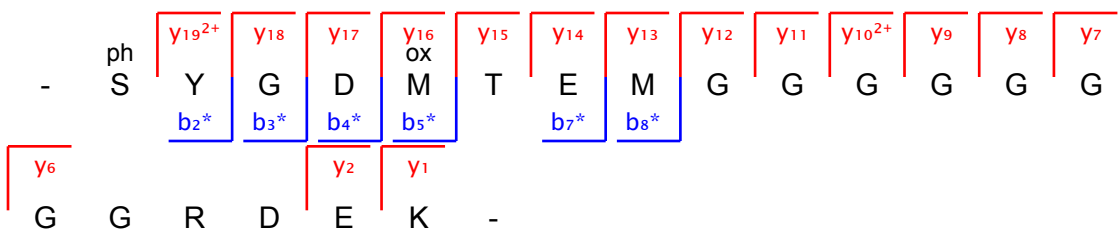





Raw file Scan Method Score m/z  
 2013\_COL15\_30\_34 5643 FTMS; HCD 139.11 910.85

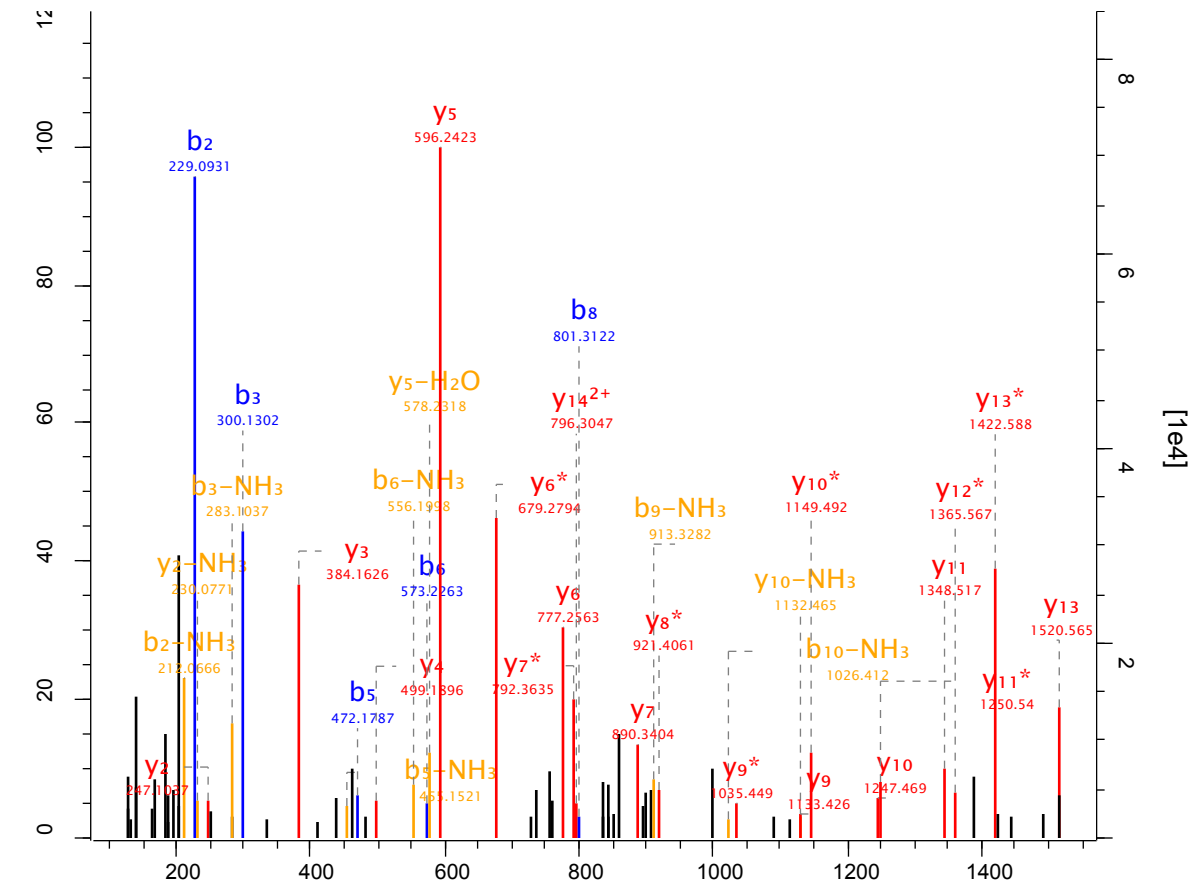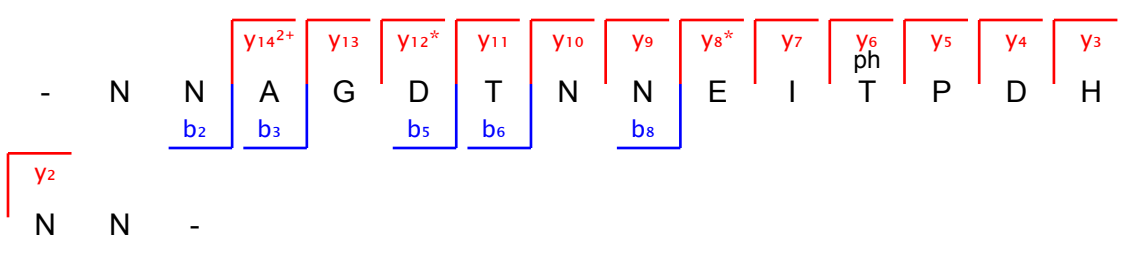

| Raw file         | Scan | Method    | Score | m/z    |
|------------------|------|-----------|-------|--------|
| 2013_COL15_30_34 | 5813 | FTMS; HCD | 53.36 | 657.63 |

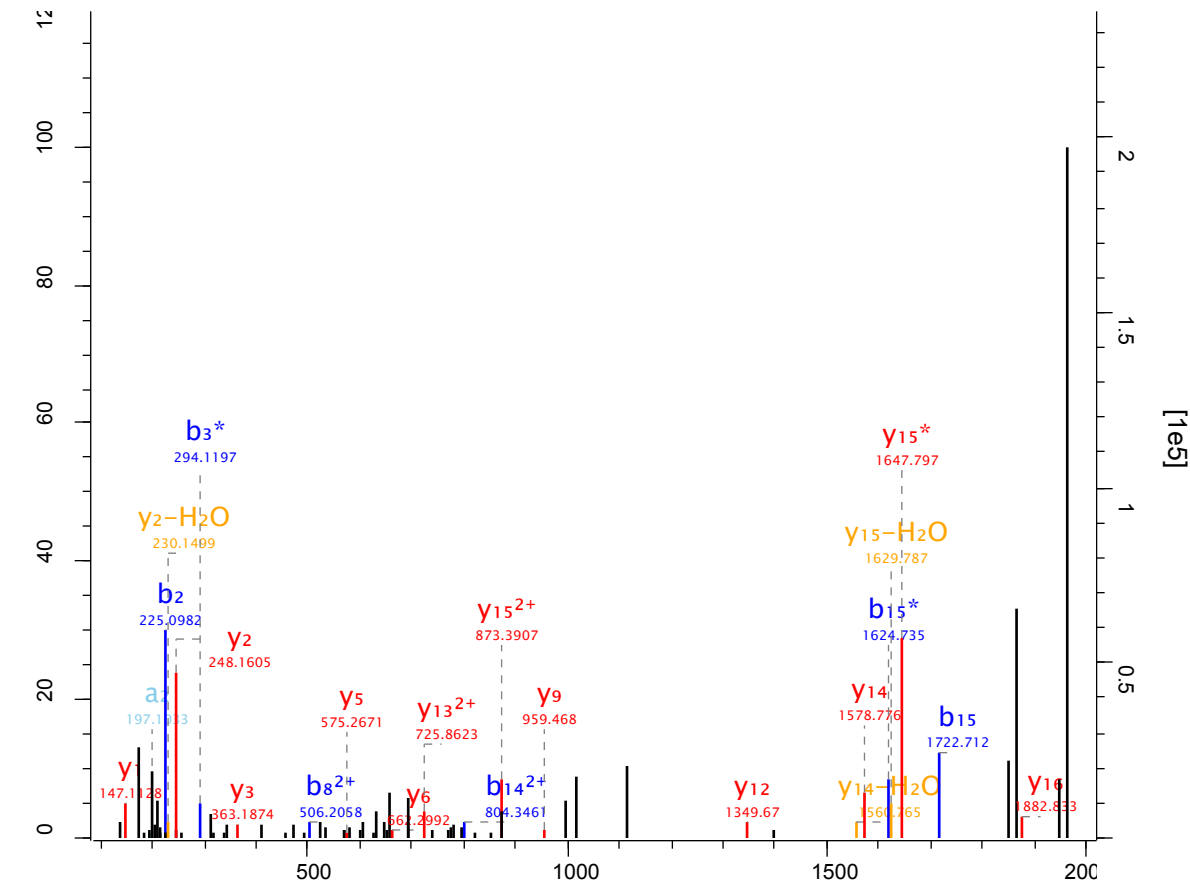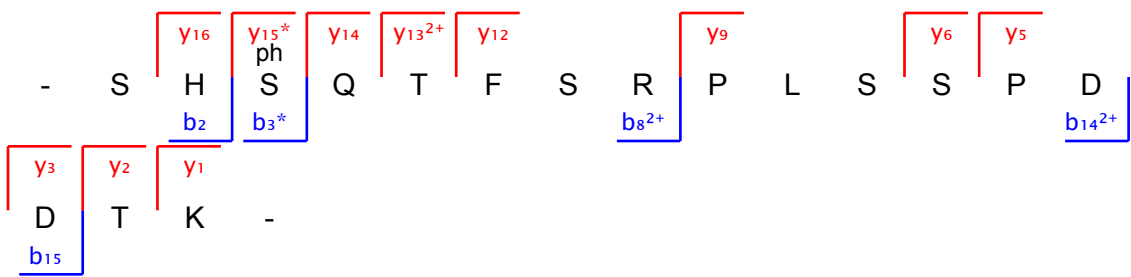

Raw file Scan Method Score m/z  
 2013\_COL15\_30\_34 5946 FTMS; HCD 64.37 485.71

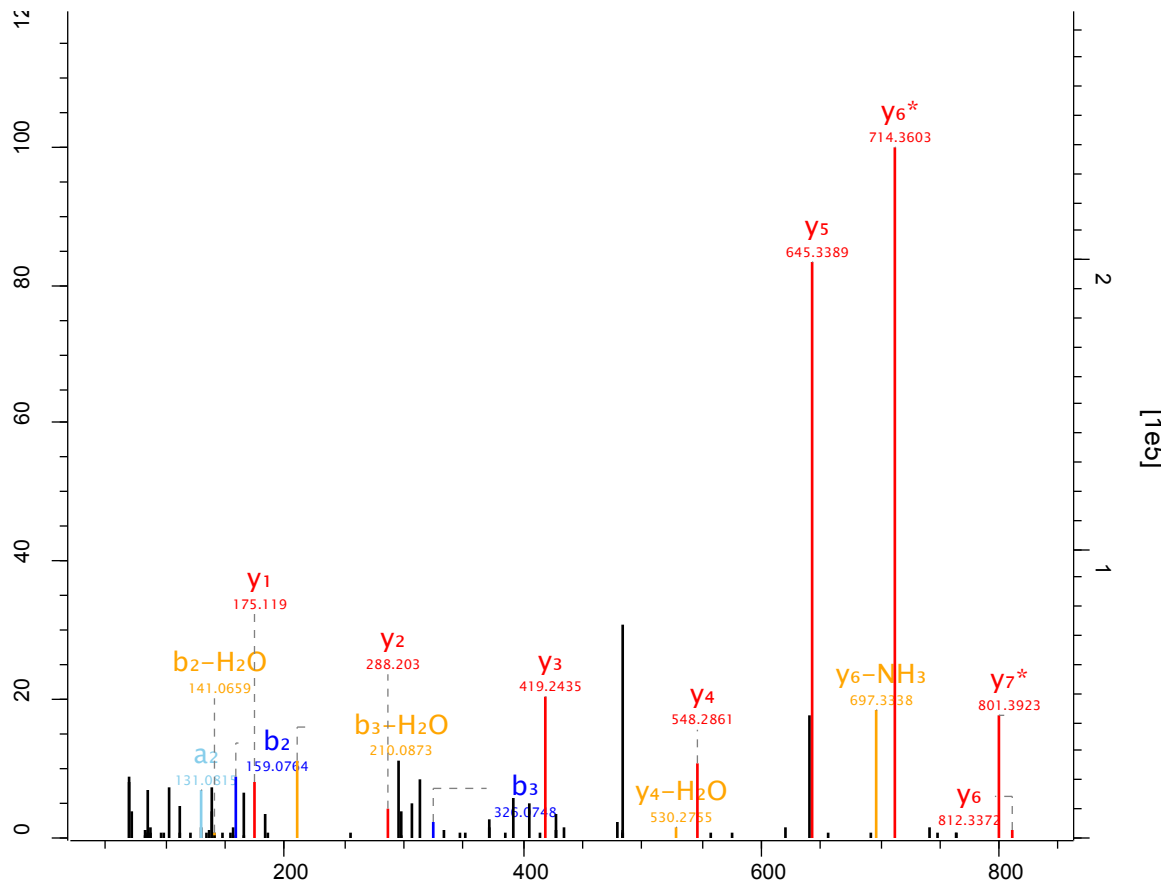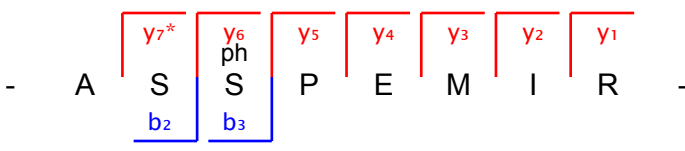

Raw file: 2013\_COL15\_30\_34  
 Scan: 5998  
 Method: FTMS; HCD  
 Score: 64.25  
 m/z: 653.95

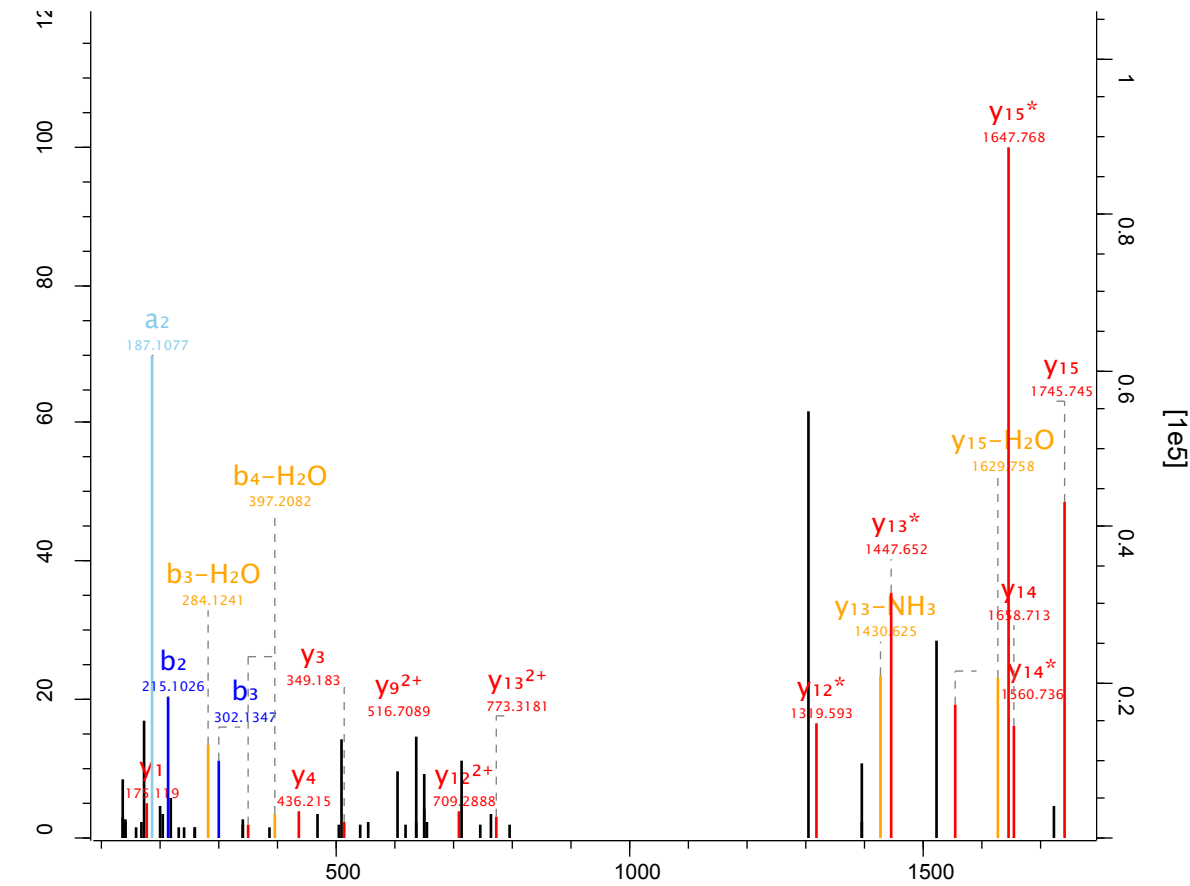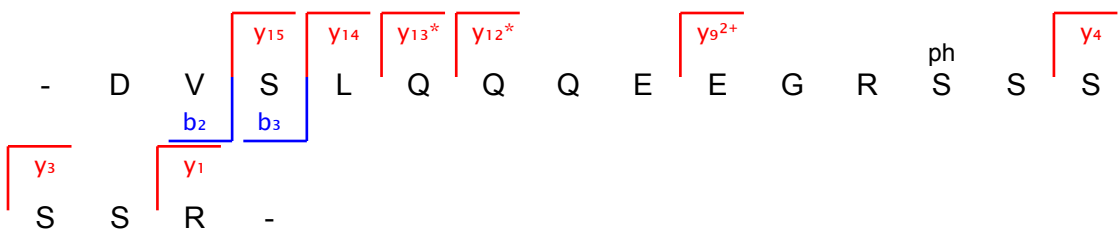

| Raw file         | Scan | Method    | Score | m/z    |
|------------------|------|-----------|-------|--------|
| 2013_COL15_30_34 | 6021 | FTMS; HCD | 58.89 | 650.28 |

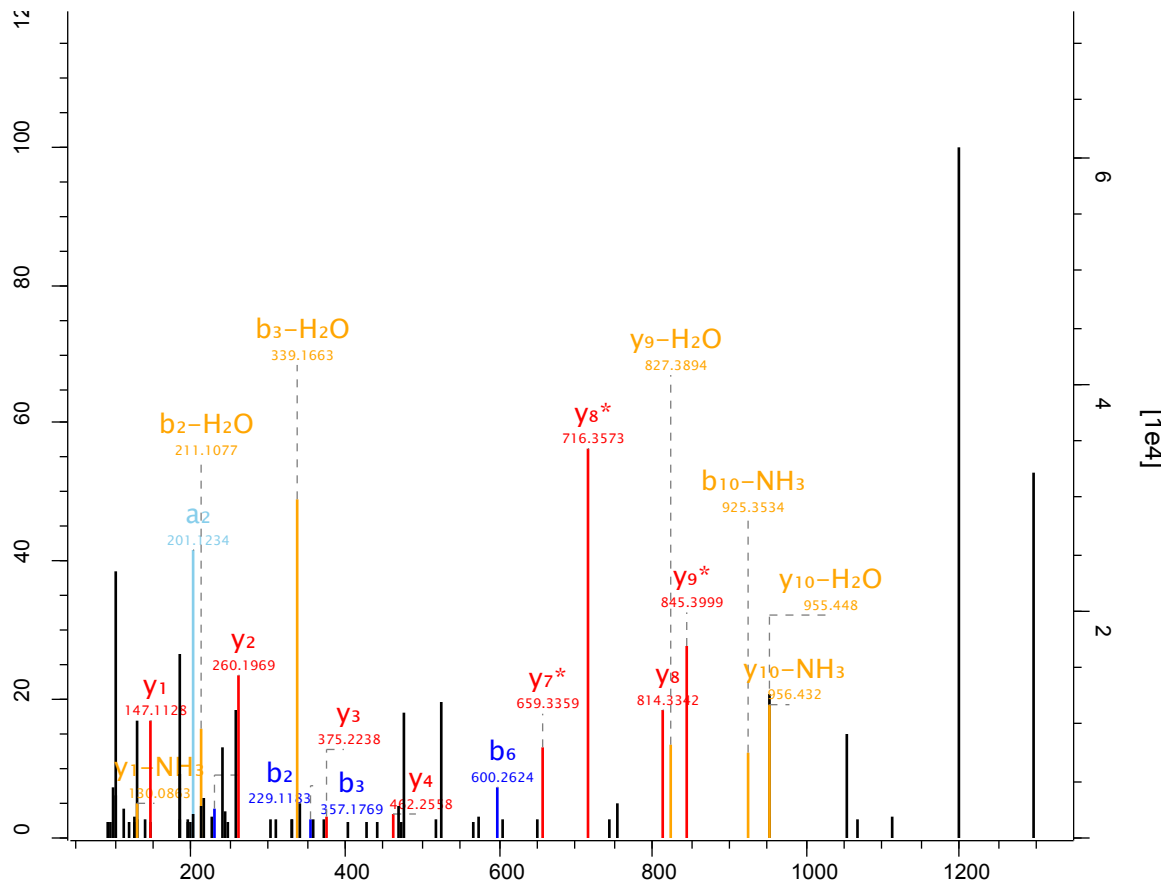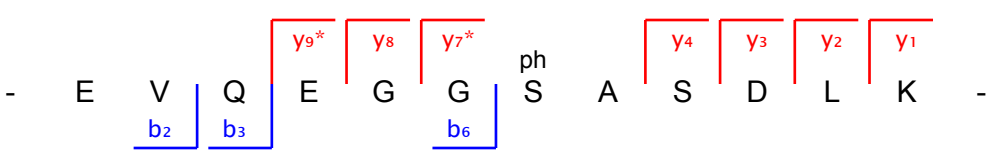

Raw file Scan Method Score m/z  
 2013\_COL15\_30\_34 6055 FTMS; HCD 106.38 508.55

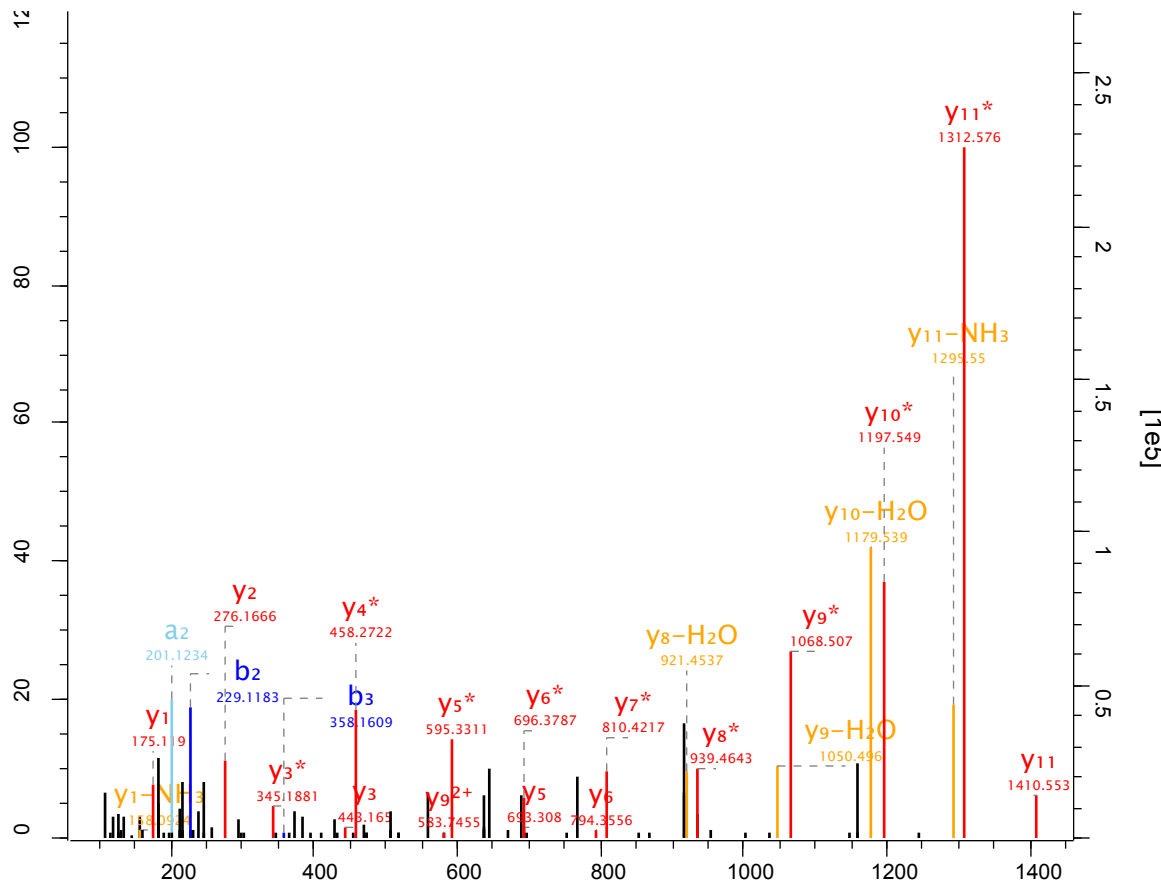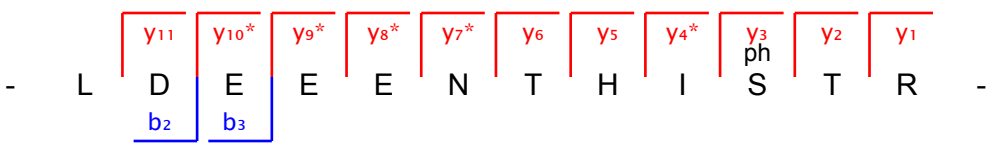

Raw file Scan Method Score m/z  
 2013\_COL15\_30\_34 6059 FTMS; HCD 51.5 516.22

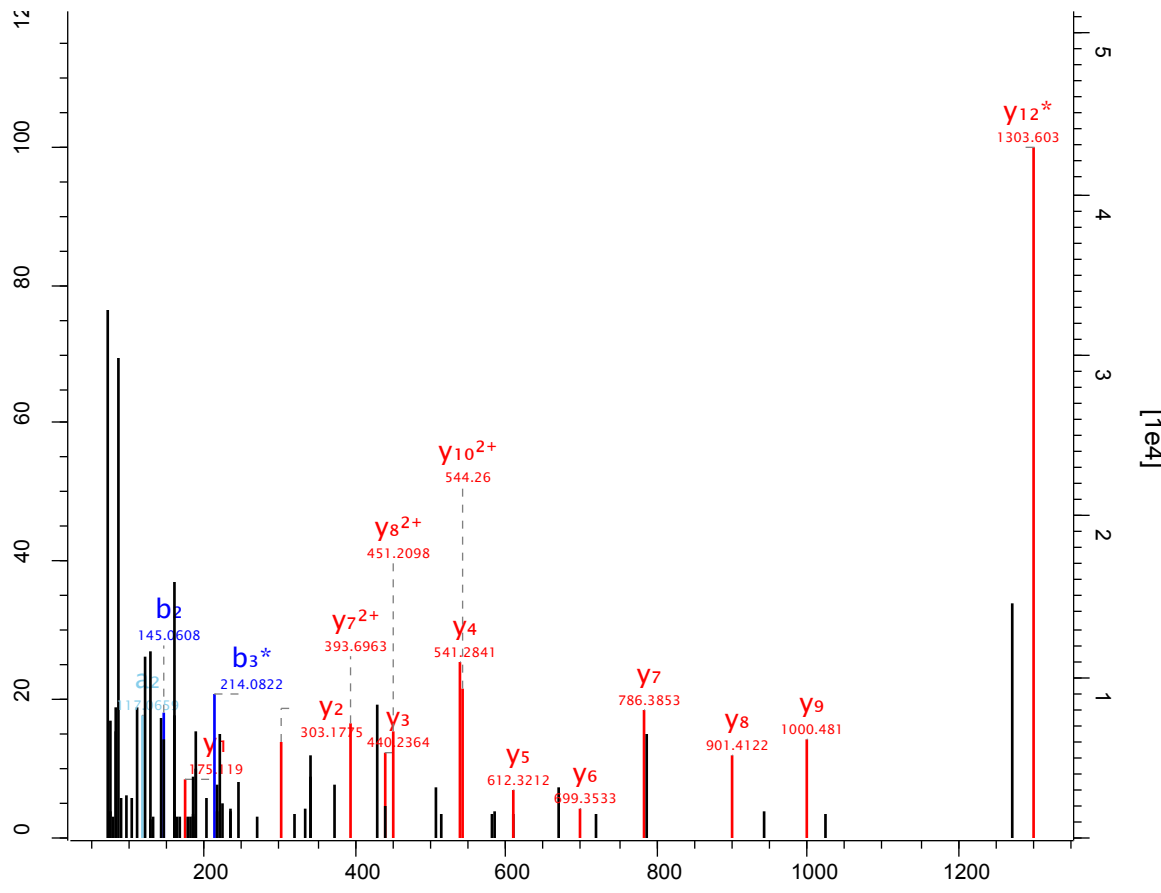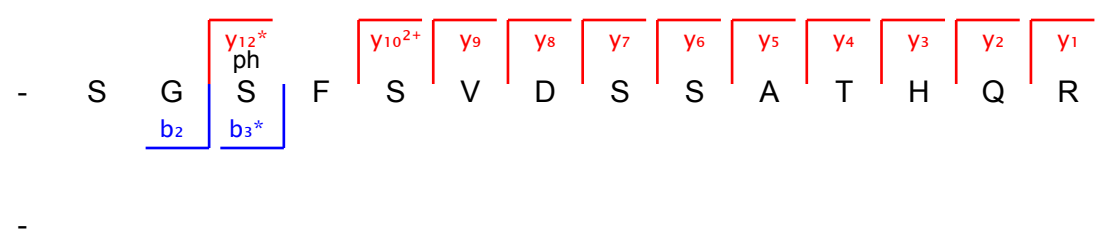

Raw file Scan Method Score m/z  
 2013\_COL15\_30\_34 6150 FTMS; HCD 51.73 454.49

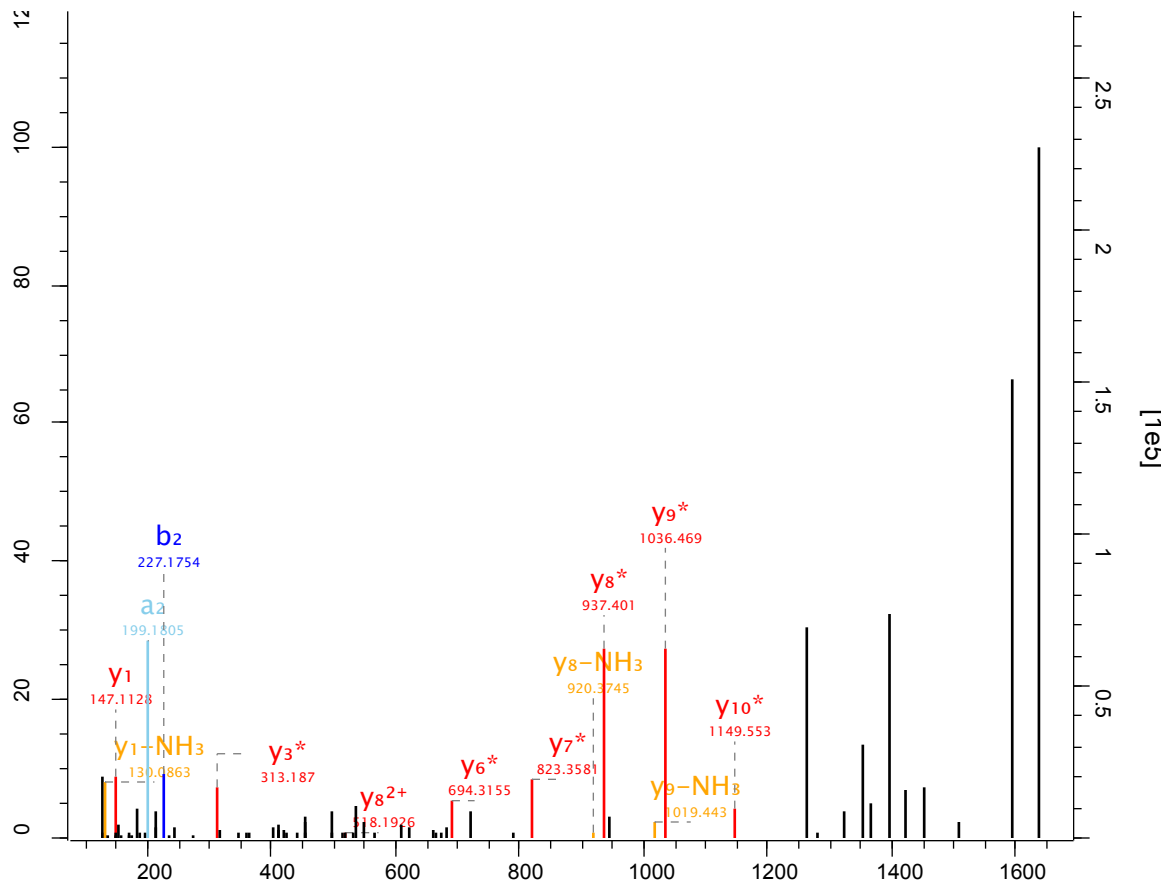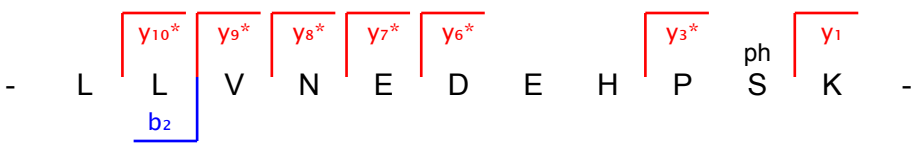



Raw file Scan Method Score m/z  
 2013\_COL15\_30\_34 6178 FTMS; HCD 47.22 664.29

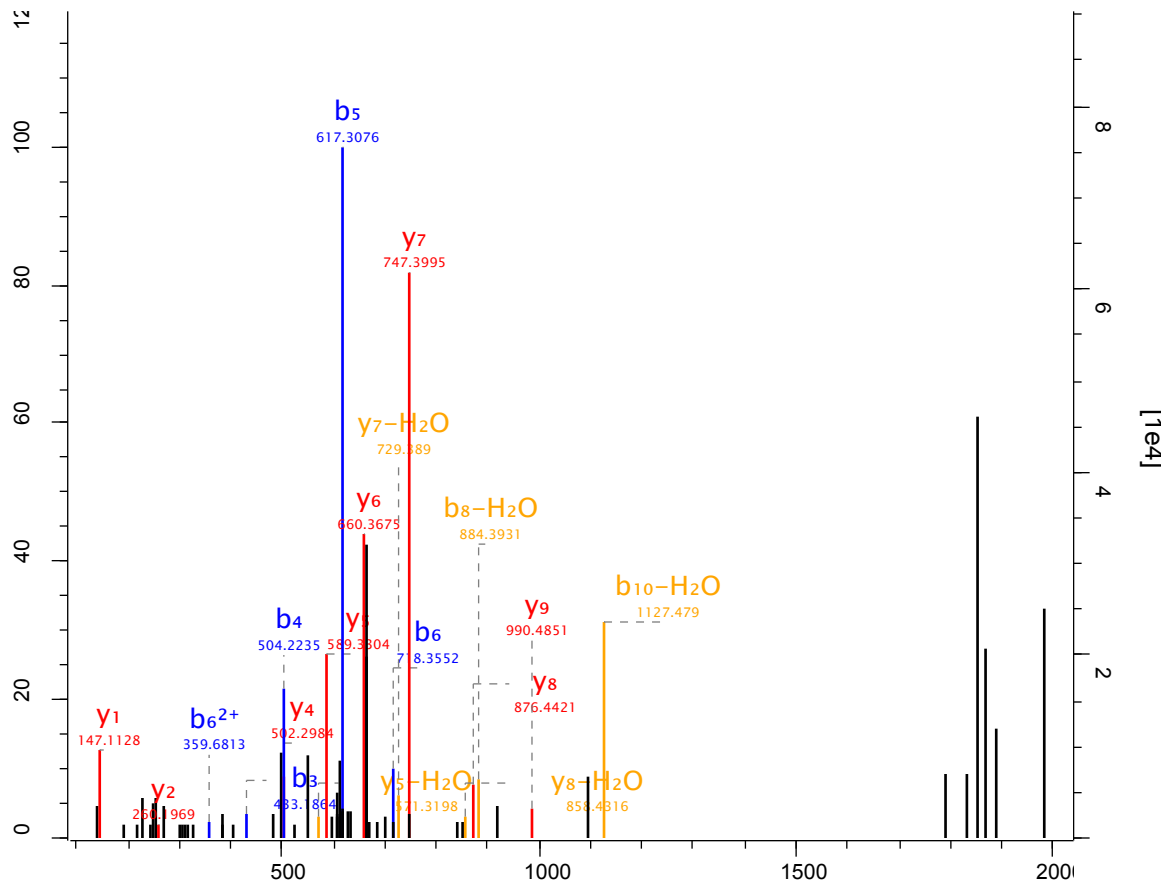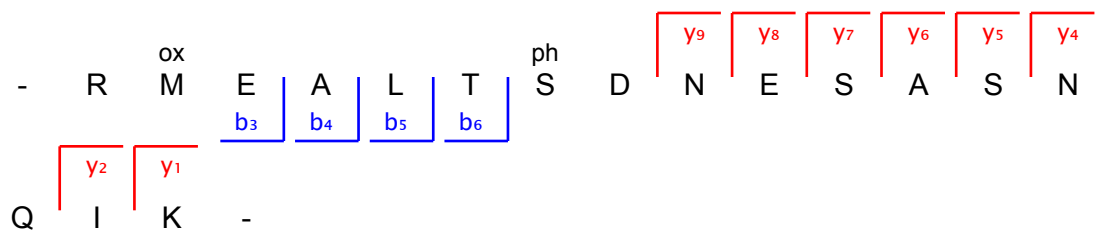

Raw file Scan Method Score m/z  
 2013\_COL15\_30\_34 6201 FTMS; HCD 116.58 603.79

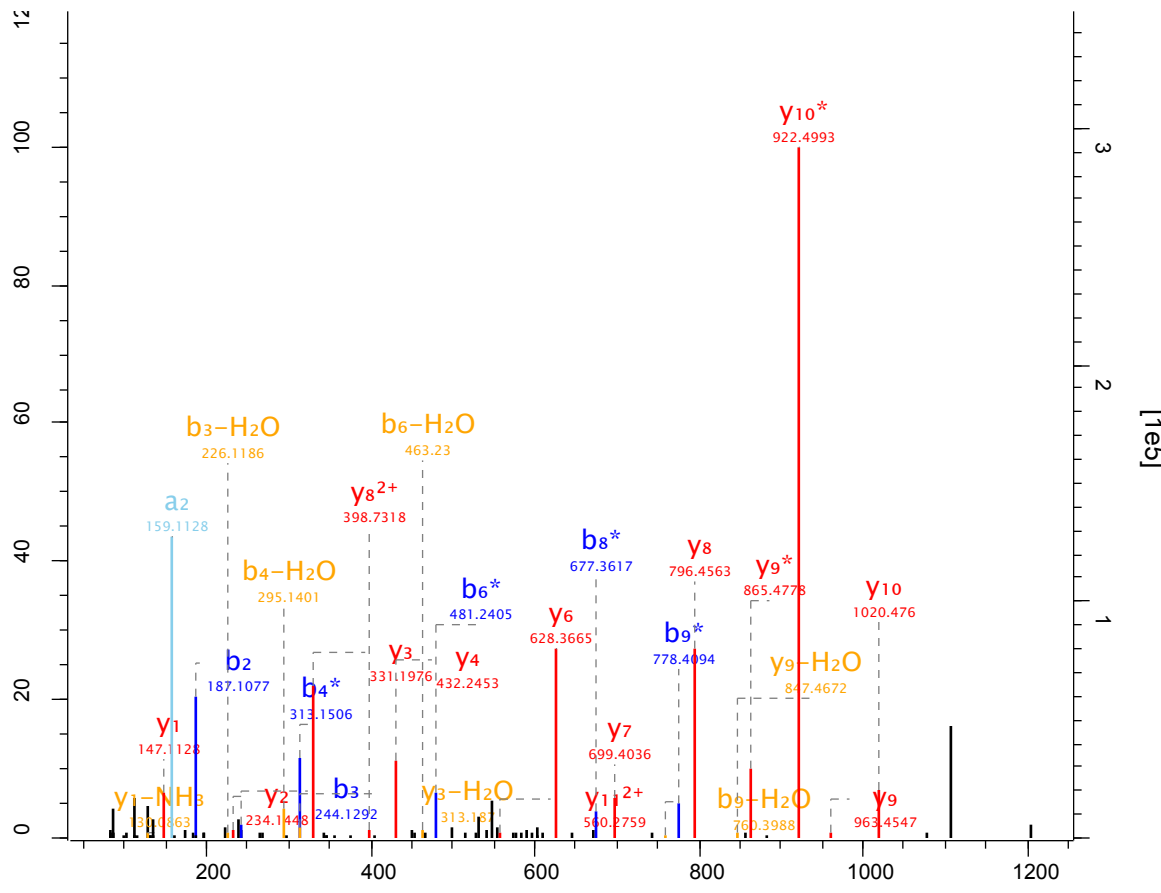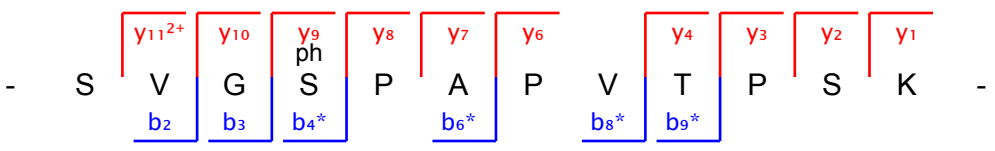

Raw file Scan Method Score m/z  
 2013\_COL15\_30\_34 6392 FTMS; HCD 311.03 779.32

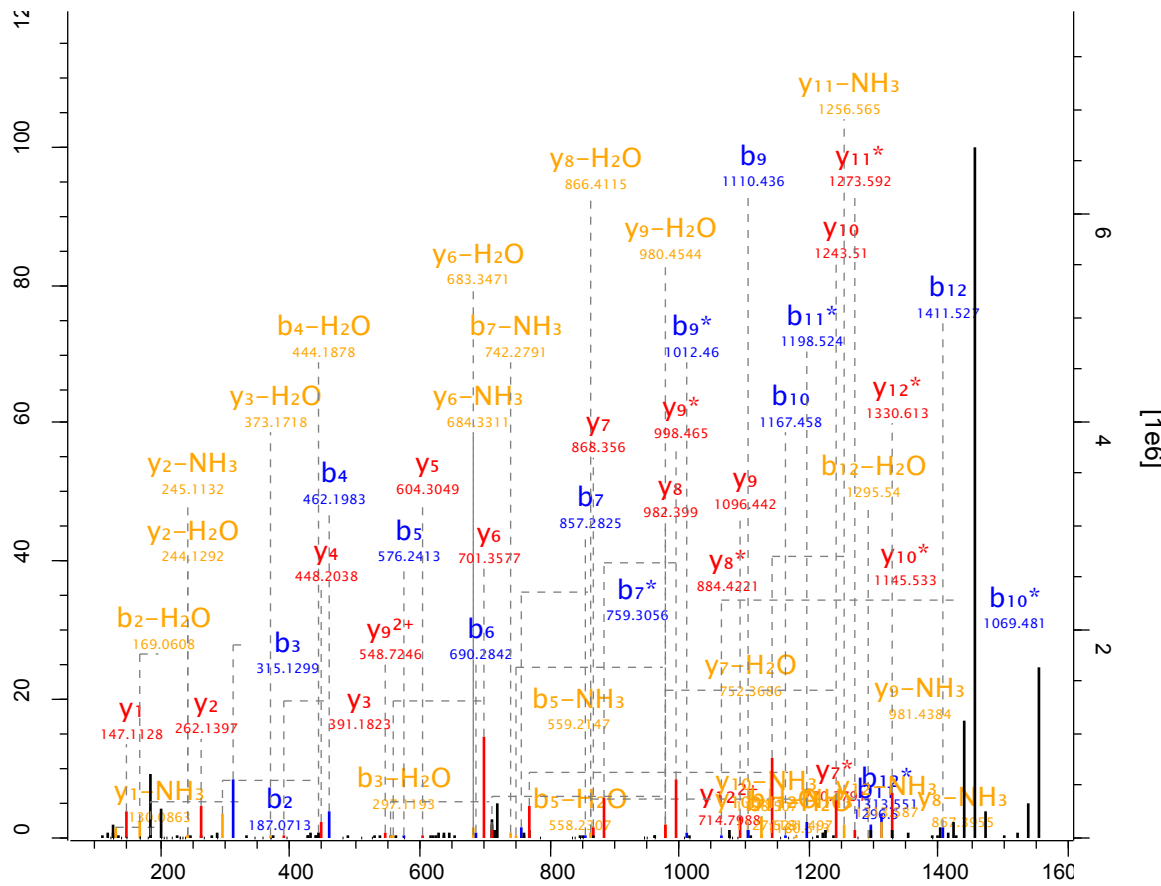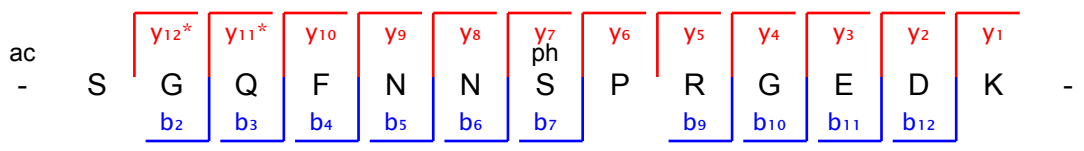

Raw file 2013\_COL15\_30\_34 Scan 6394 Method FTMS; HCD Score 99.39 m/z 689.81

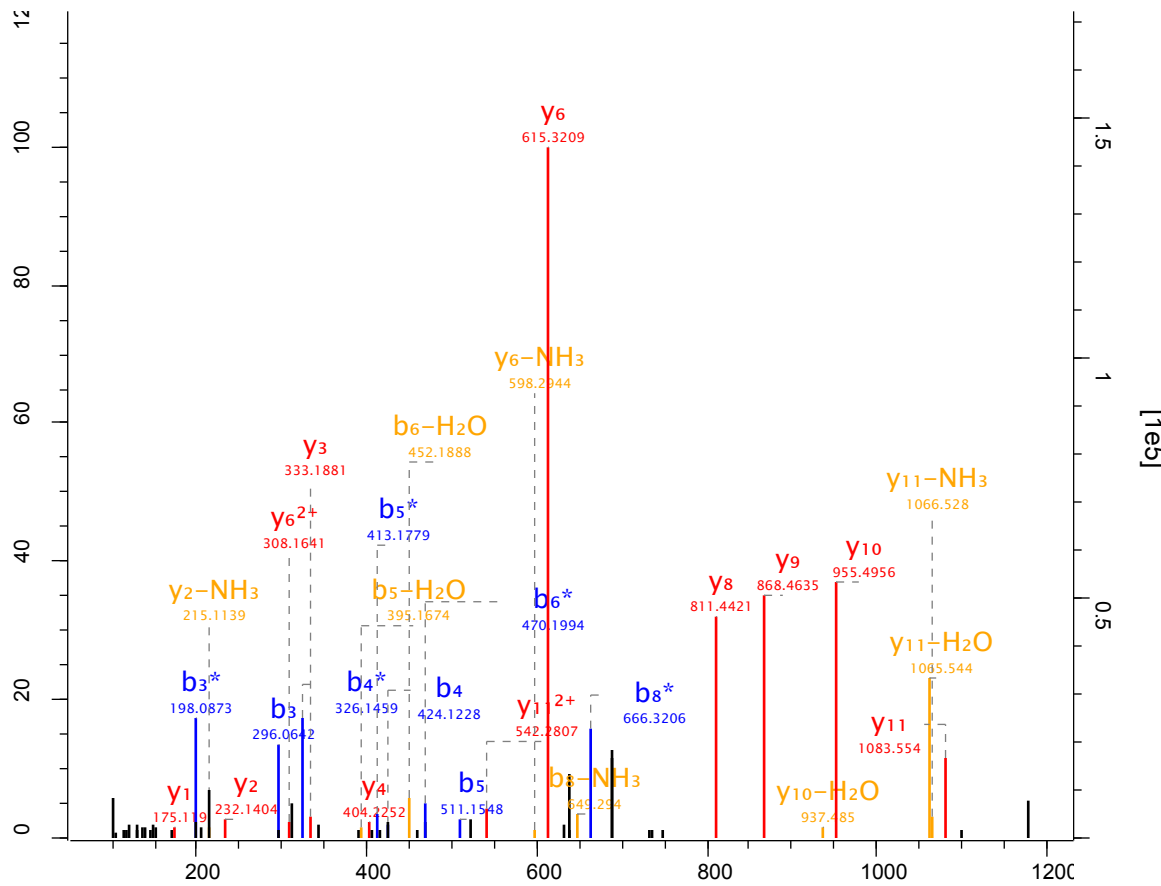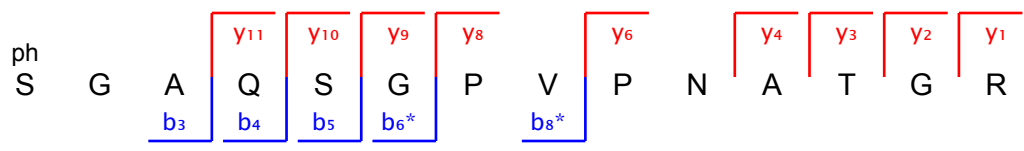

Raw file Scan Method Score m/z  
 2013\_COL15\_30\_34 6681 FTMS; HCD 94.09 517.26

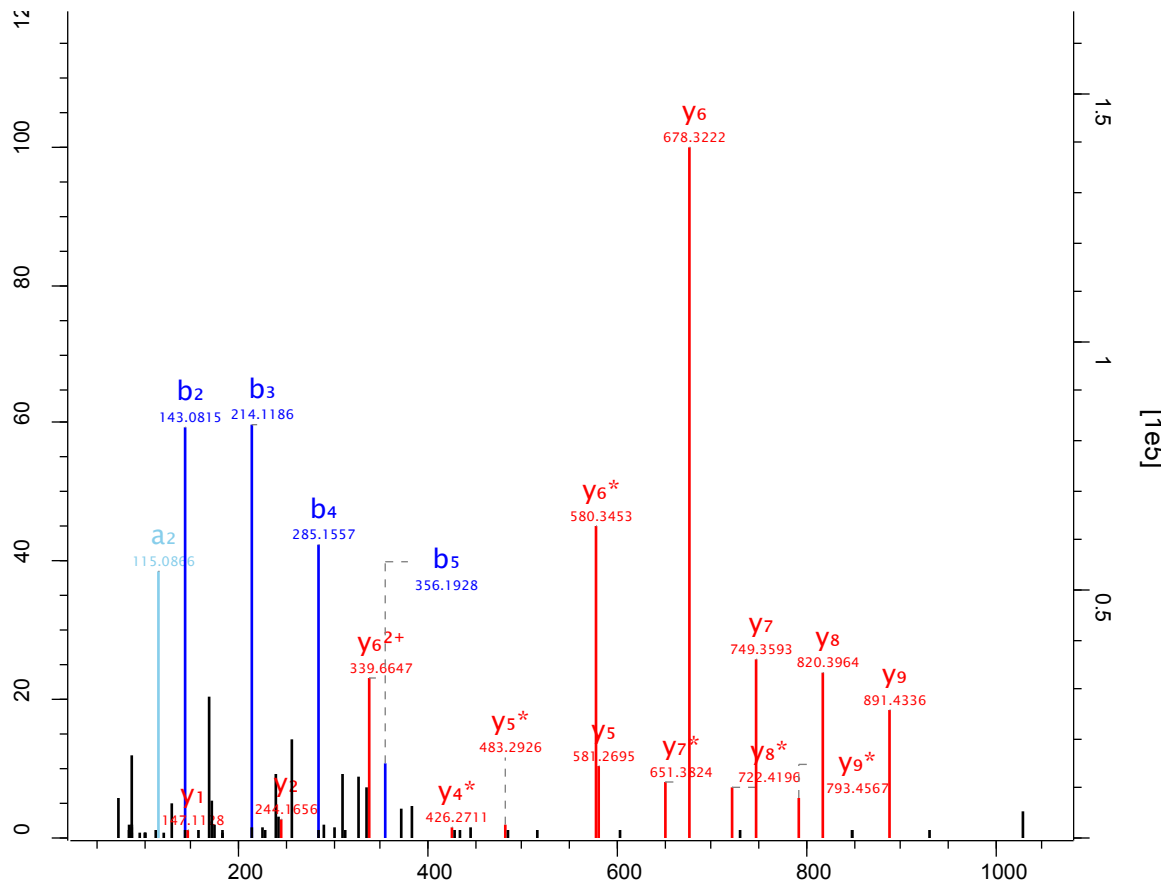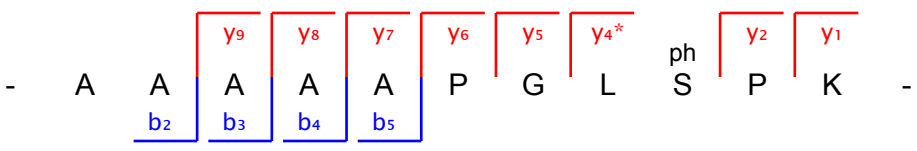

Raw file

Scan

Method

Score

m/z

2013\_COL15\_30\_34

6843

FTMS; HCD

50.83

554.9

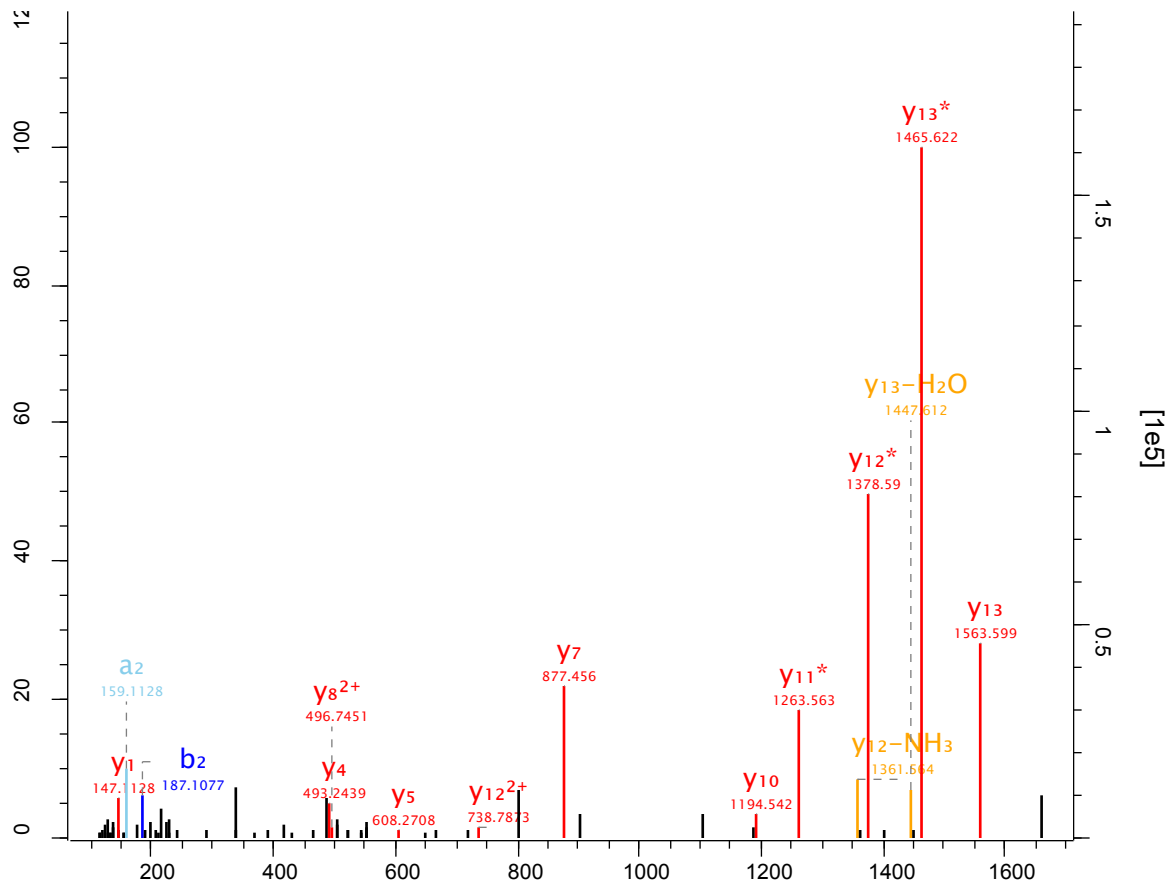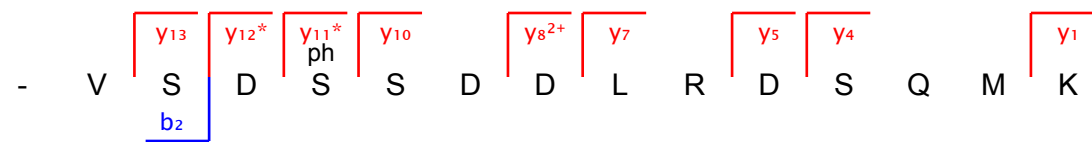

Raw file Scan Method Score m/z  
 2013\_COL15\_30\_34 7065 FTMS; HCD 56.12 596.95

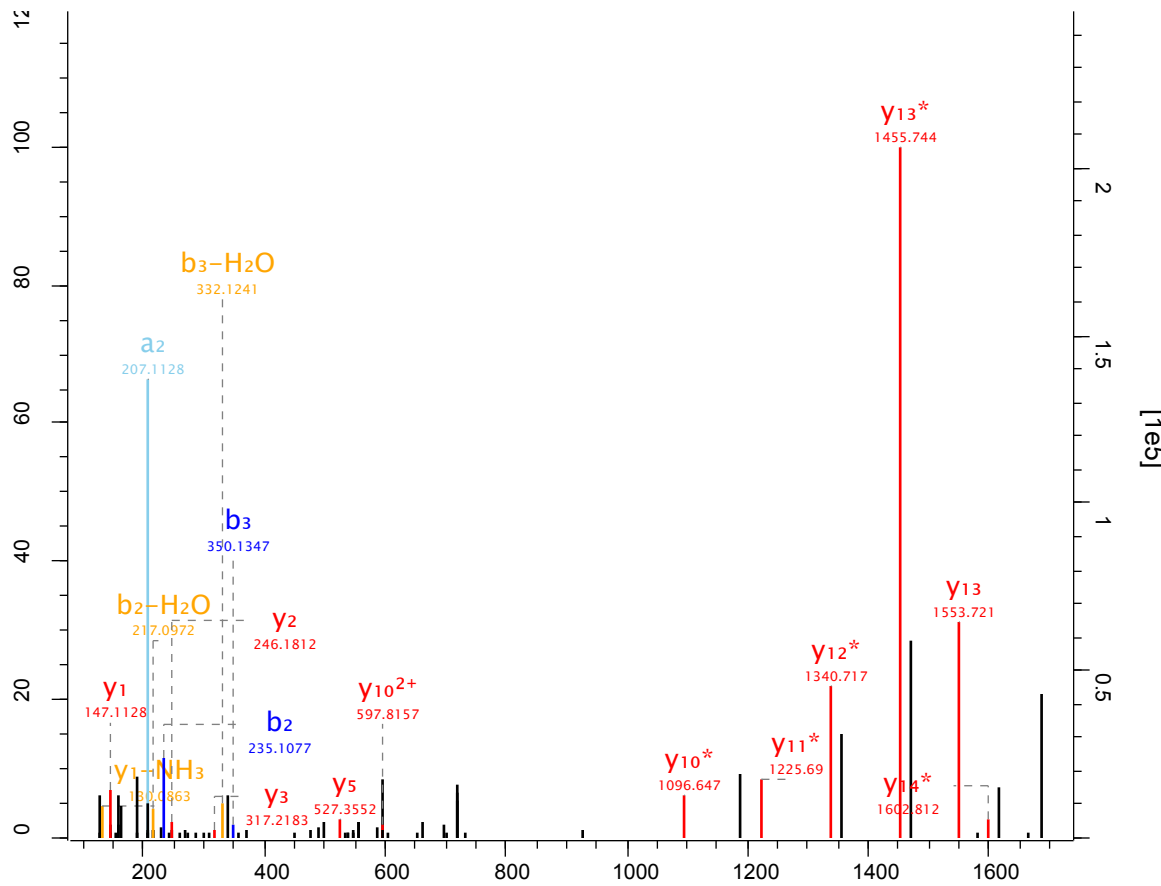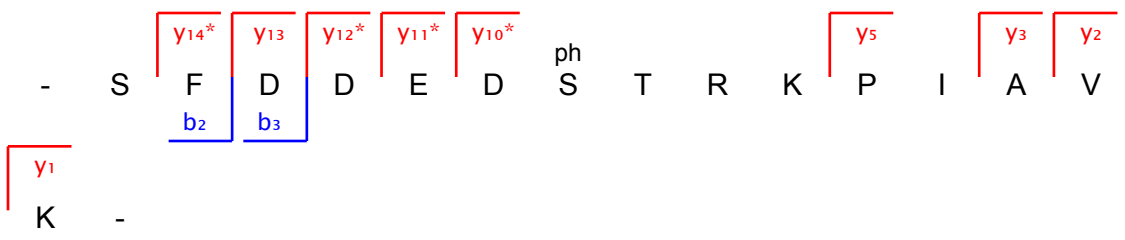

Raw file Scan Method Score m/z  
 2013\_COL15\_30\_34 7579 FTMS; HCD 46.07 703.79

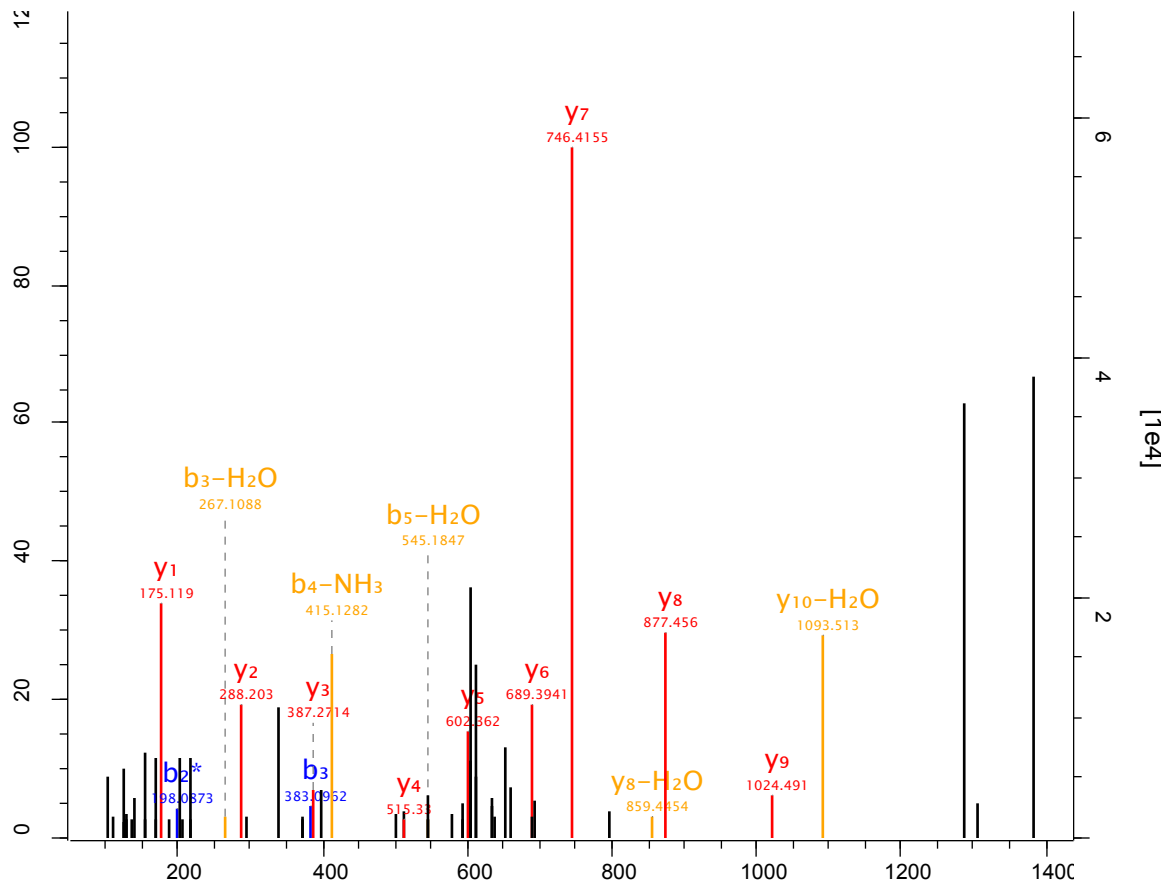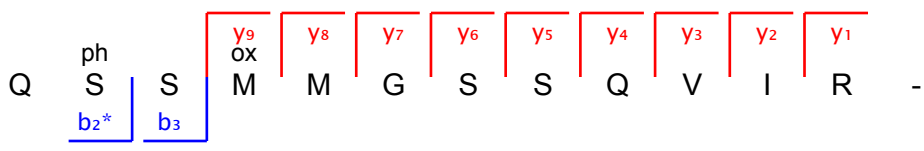



Raw file

Scan

Method

Score

m/z

2013\_COL15\_30\_34

7721

FTMS; HCD

44.39

581.3

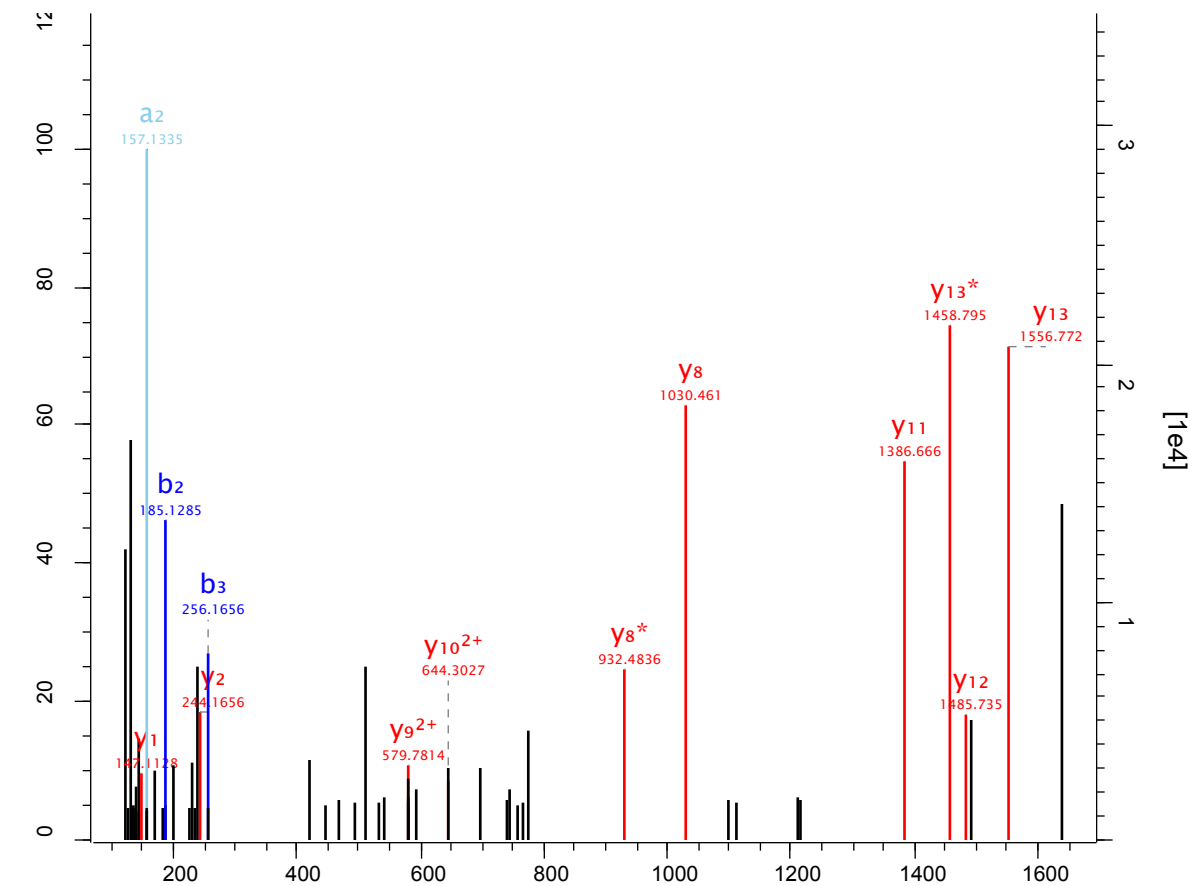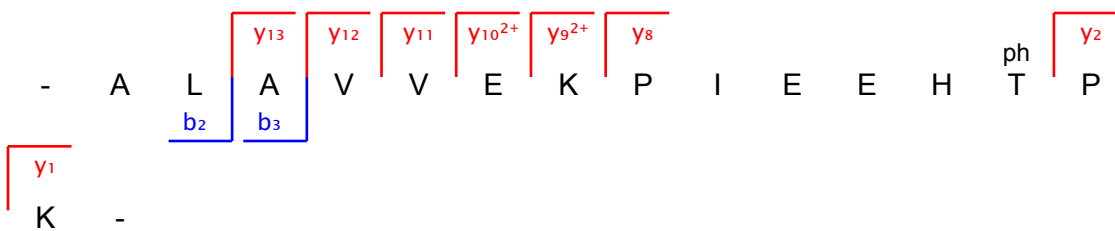

Raw file Scan Method Score m/z  
 2013\_COL15\_30\_34 7726 FTMS; HCD 64.54 693.31

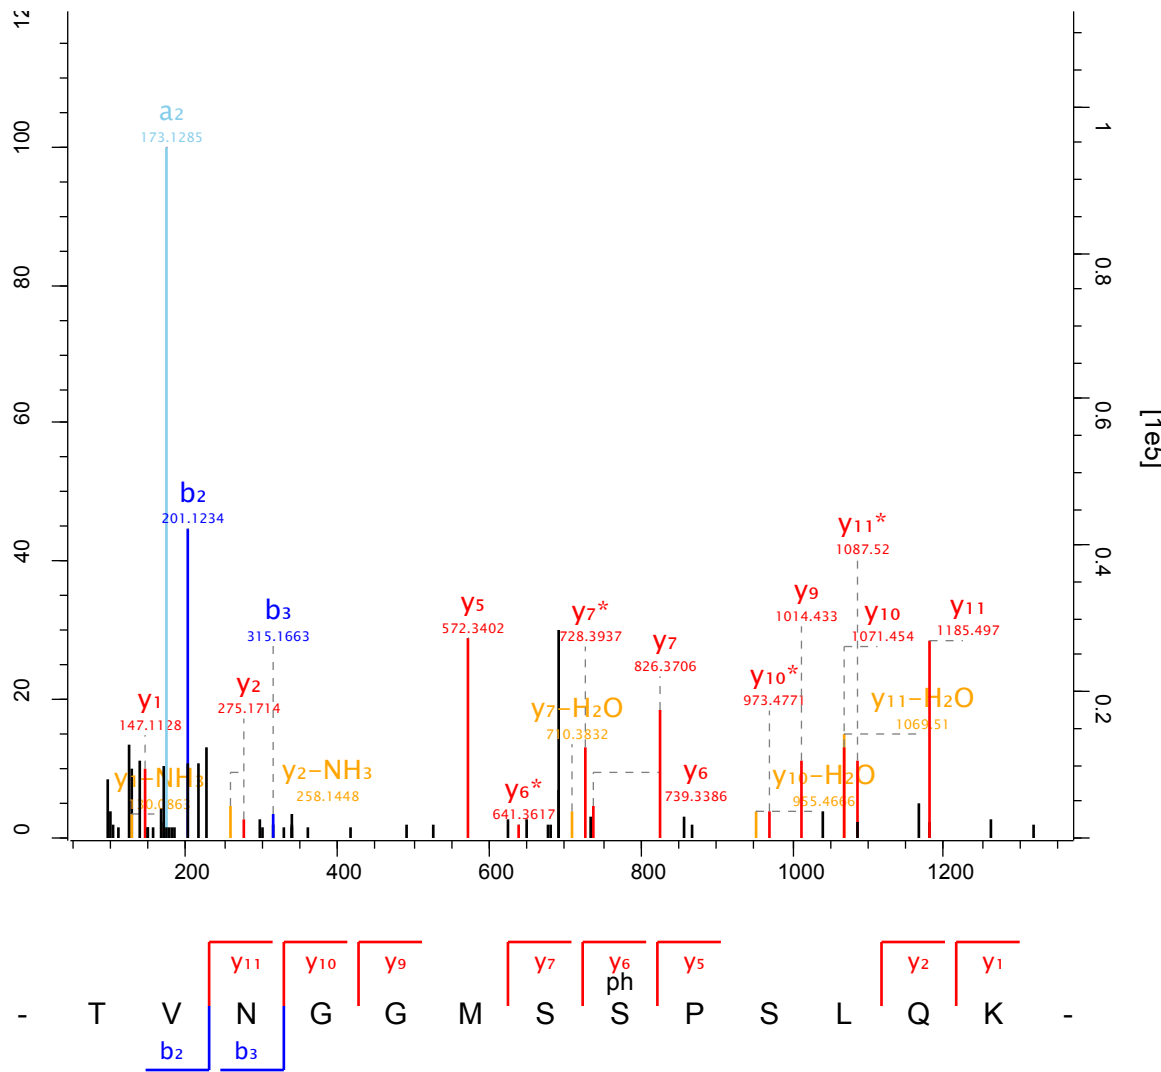

Raw file Scan Method Score m/z  
 2013\_COL15\_30\_34 7805 FTMS; HCD 53.49 613.77

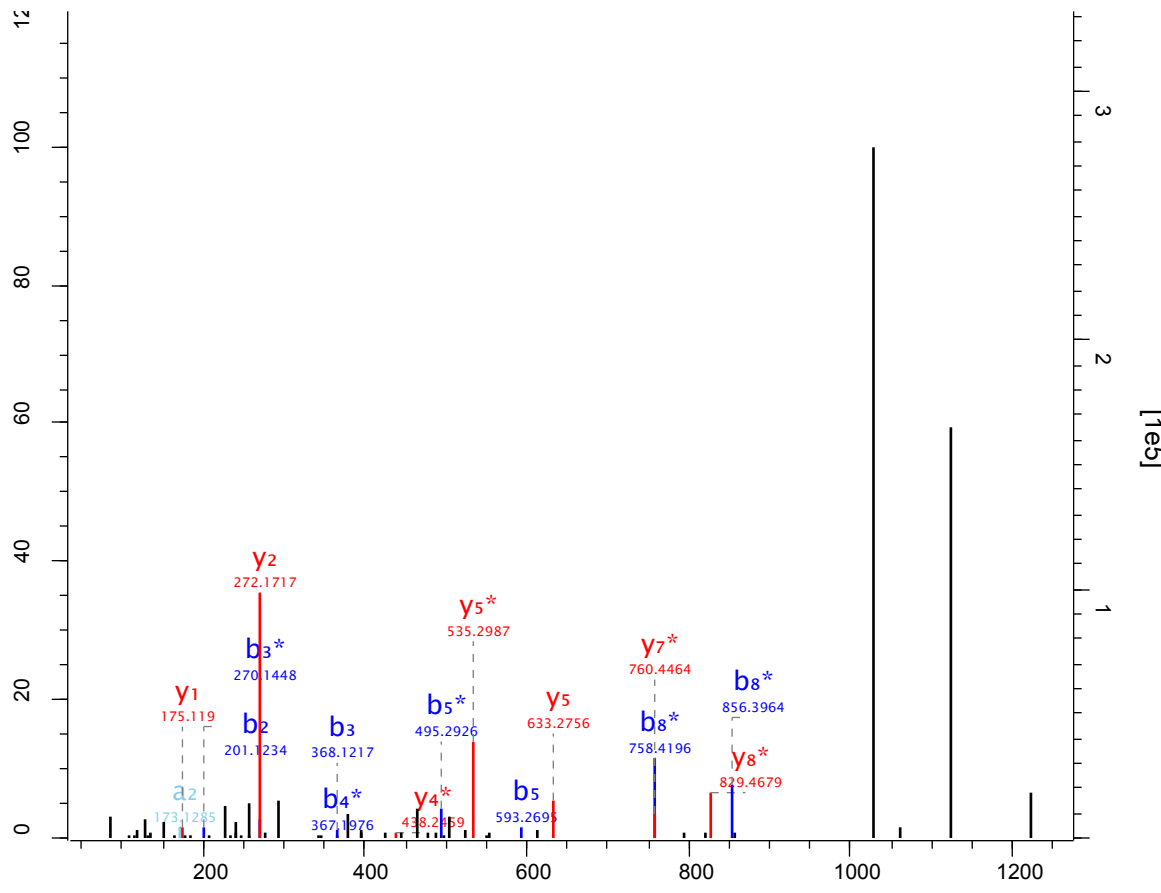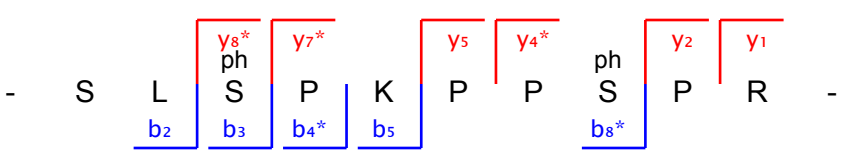

Raw file Scan Method Score m/z  
 2013\_COL15\_30\_34 7913 FTMS; HCD 47.5 678.28

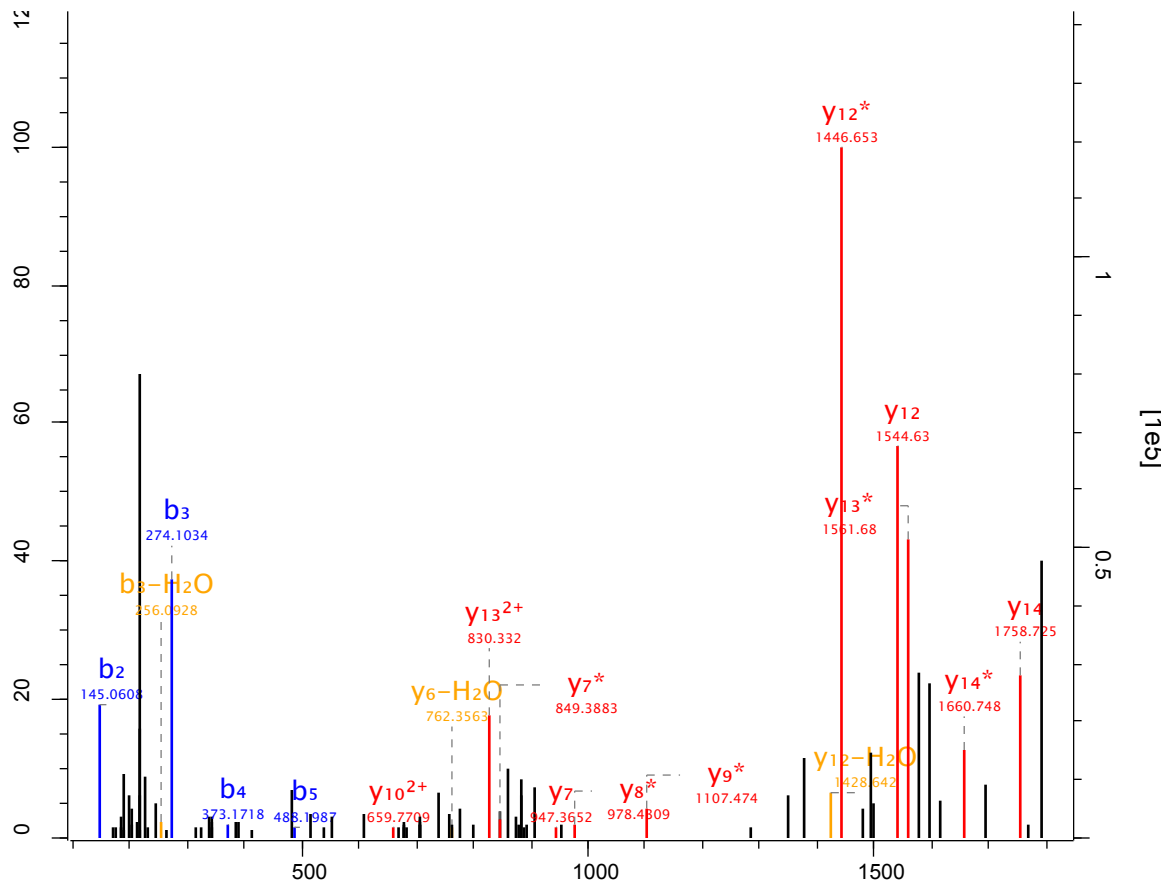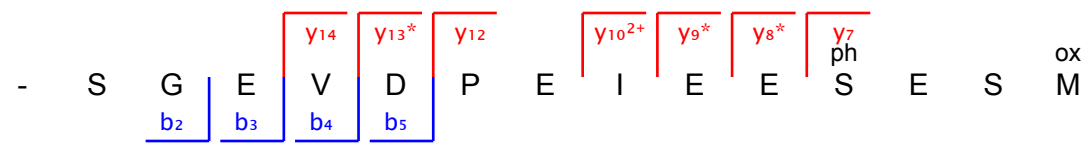

N R K -

| Raw file         | Scan | Method    | Score | m/z    |
|------------------|------|-----------|-------|--------|
| 2013_COL15_30_34 | 8031 | FTMS; HCD | 59.71 | 620.28 |

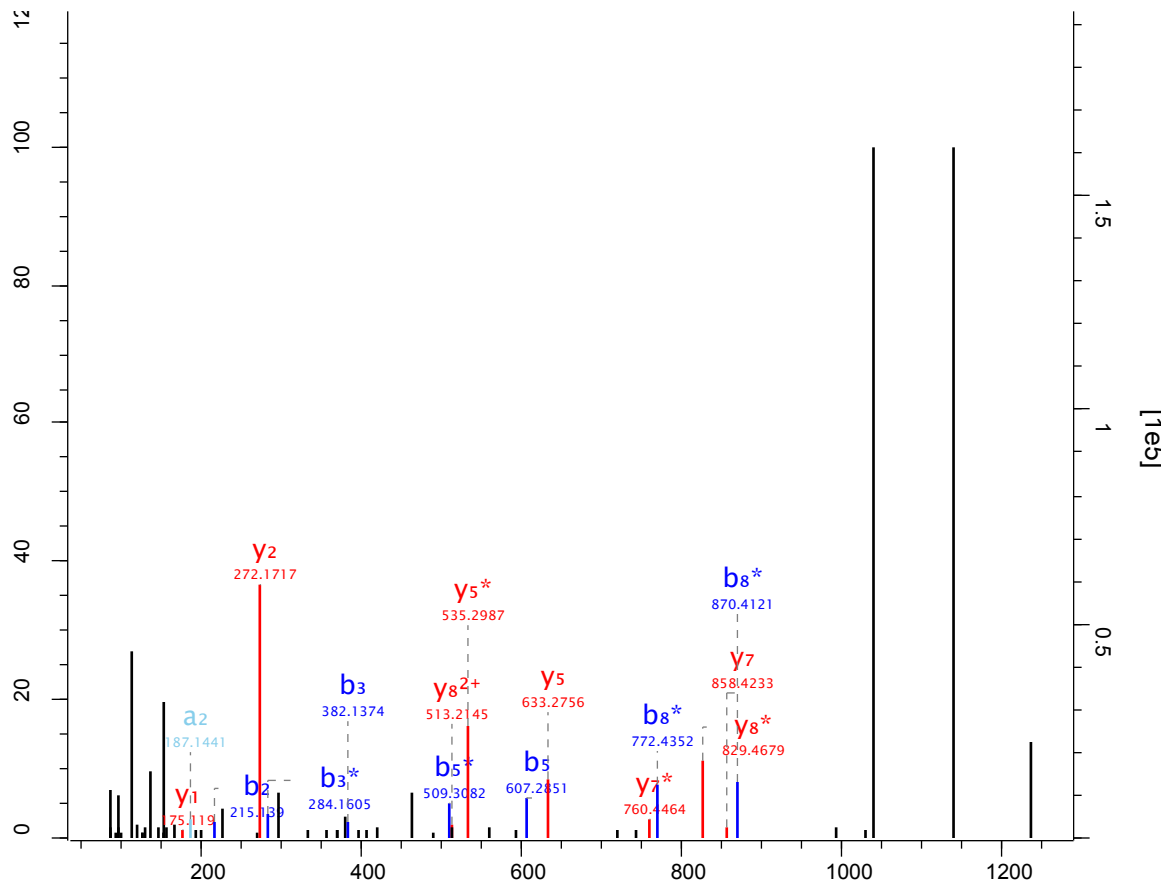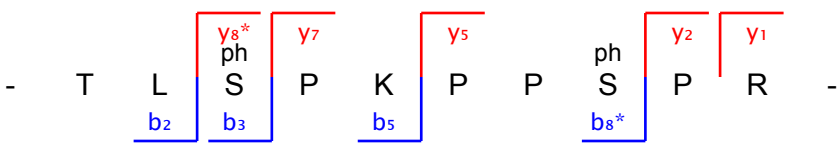

Raw file Scan Method Score m/z  
 2013\_COL15\_30\_34 8074 FTMS; HCD 45.58 729.81

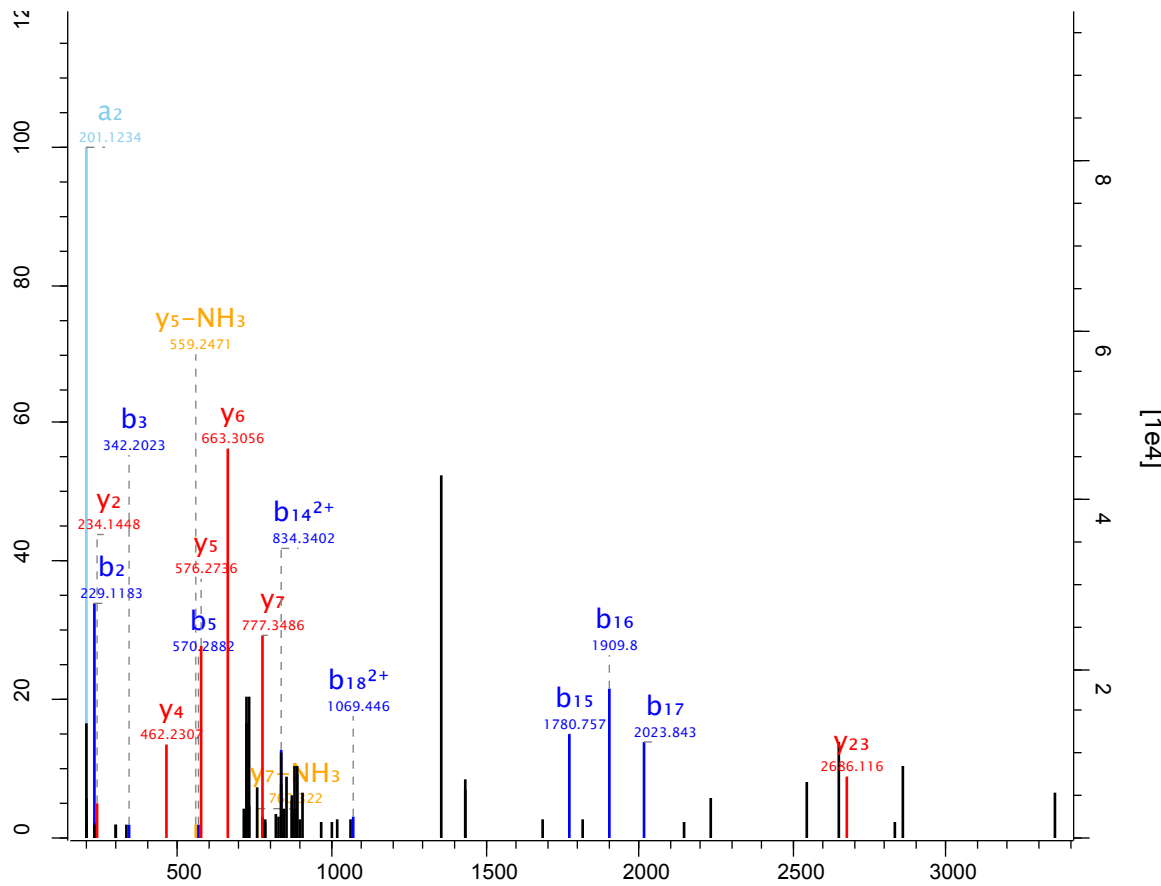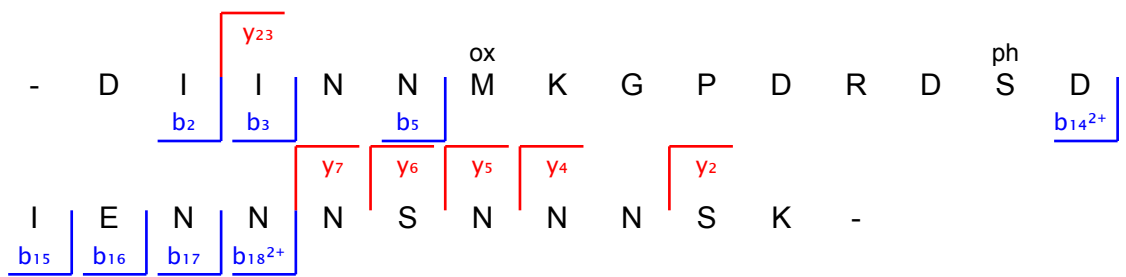

Raw file Scan Method Score m/z  
 2013\_COL15\_30\_34 8276 FTMS; HCD 110.12 750.8

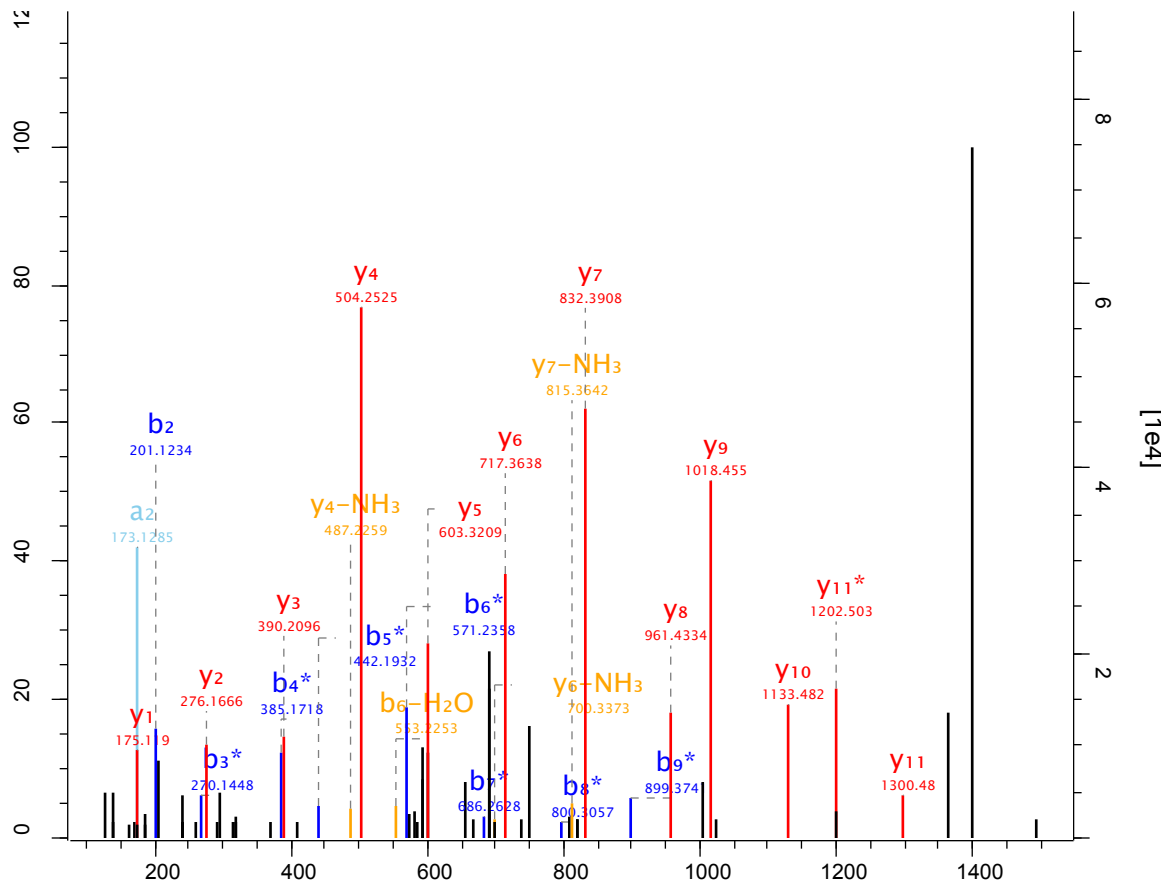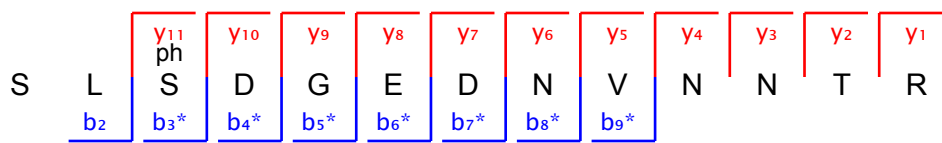

| Raw file         | Scan | Method    | Score | m/z    |
|------------------|------|-----------|-------|--------|
| 2013_COL15_30_34 | 8487 | FTMS; HCD | 58.08 | 649.29 |

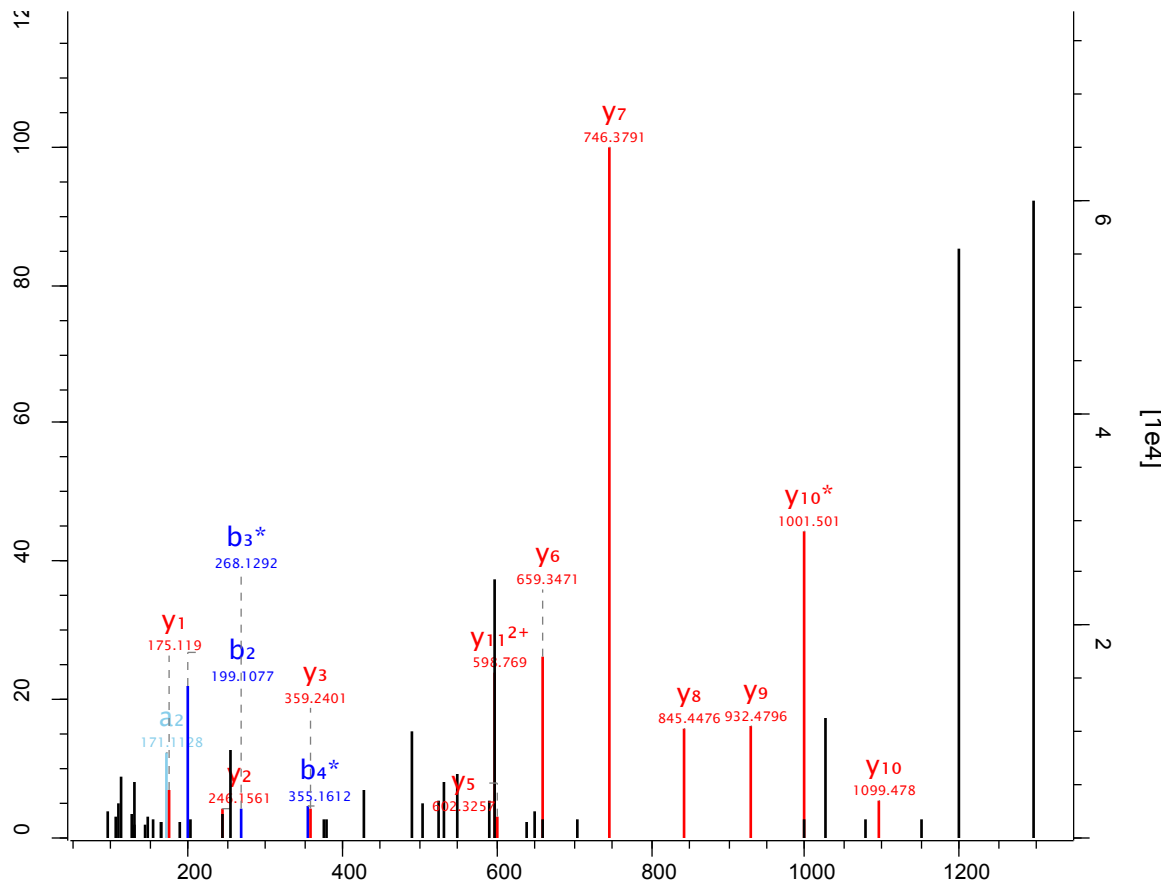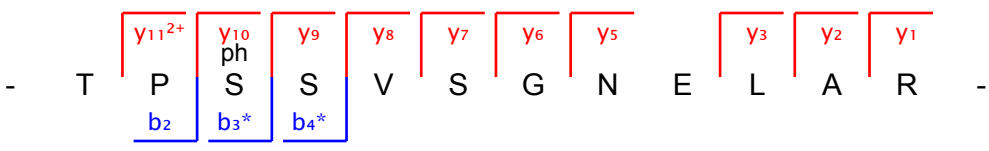



Raw file Scan Method Score m/z  
 2013\_COL15\_30\_34 8806 FTMS; HCD 118.03 441.22

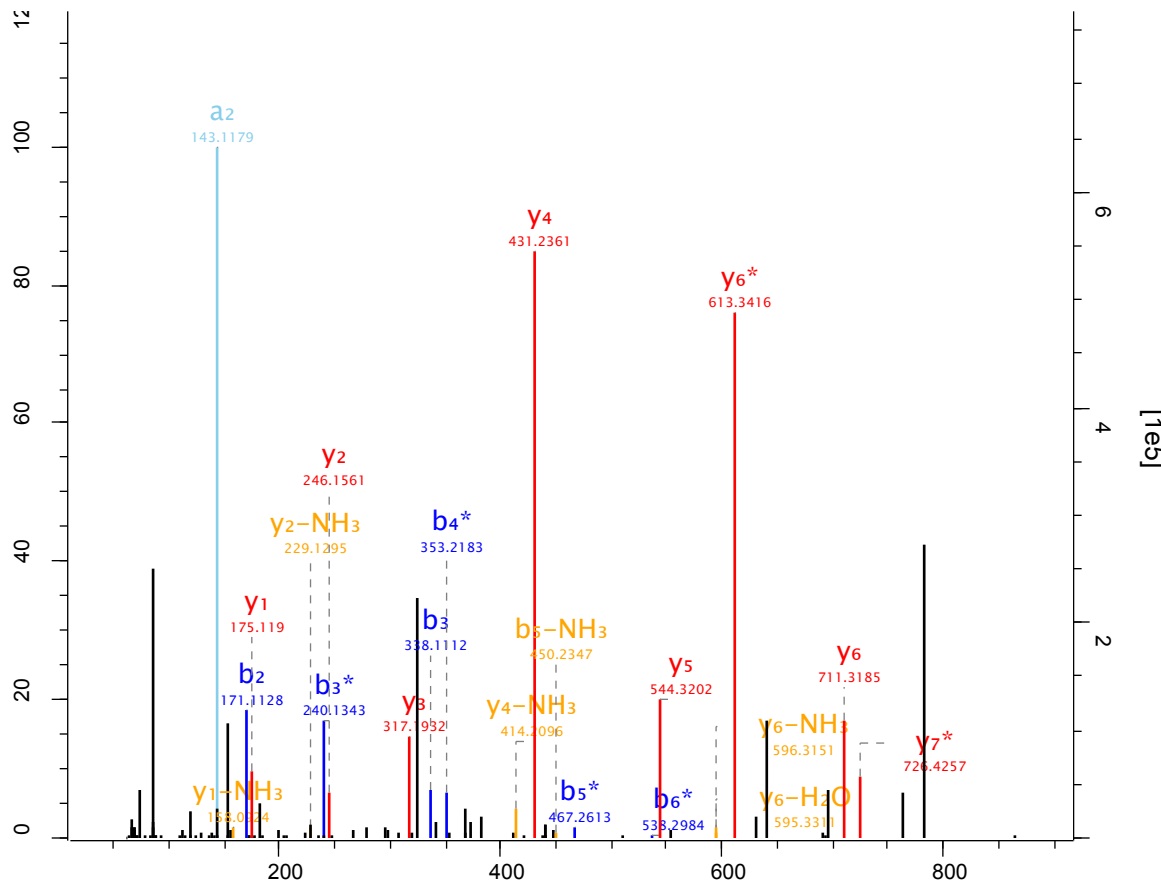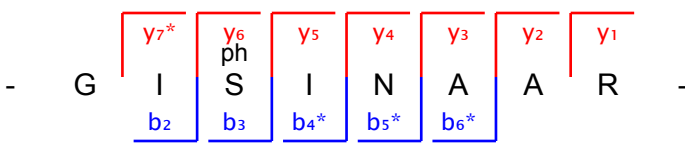

Raw file Scan Method Score m/z  
 2013\_COL15\_30\_34 8894 FTMS; HCD 104.67 642.63

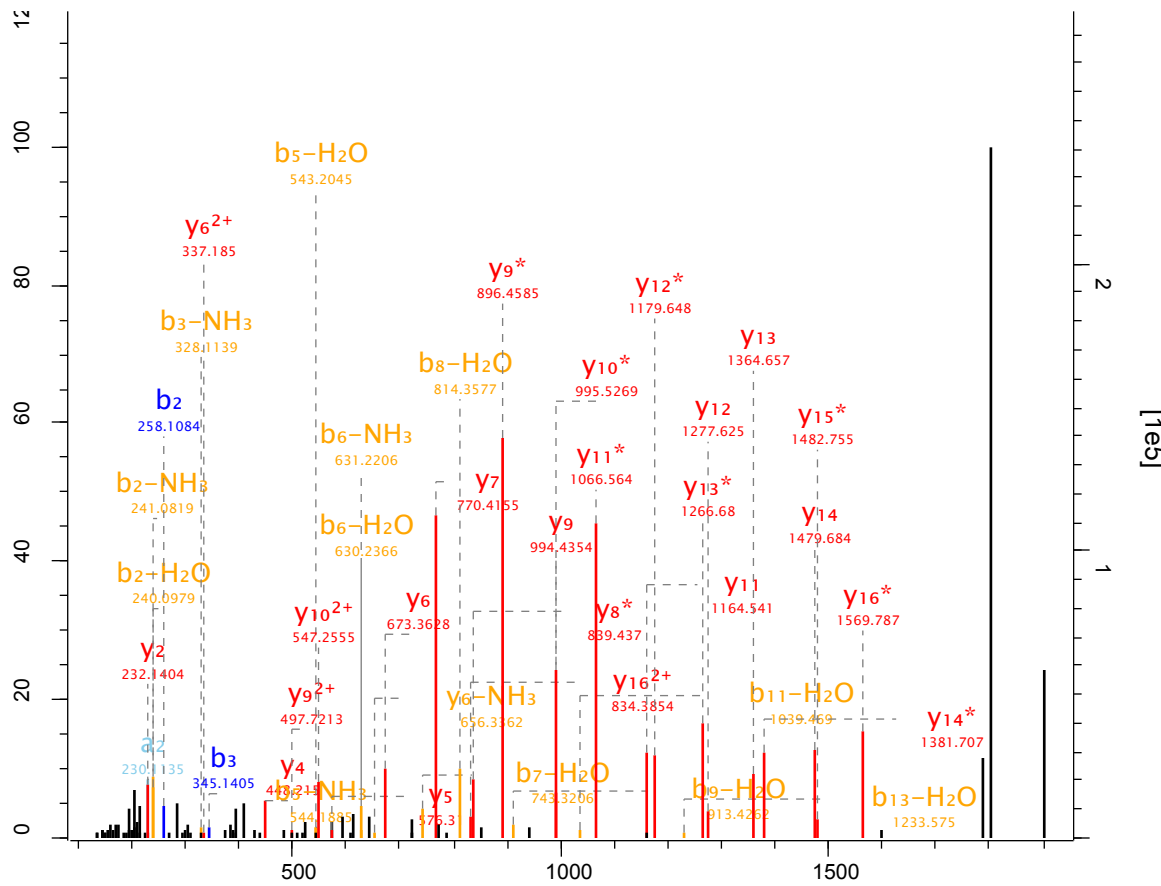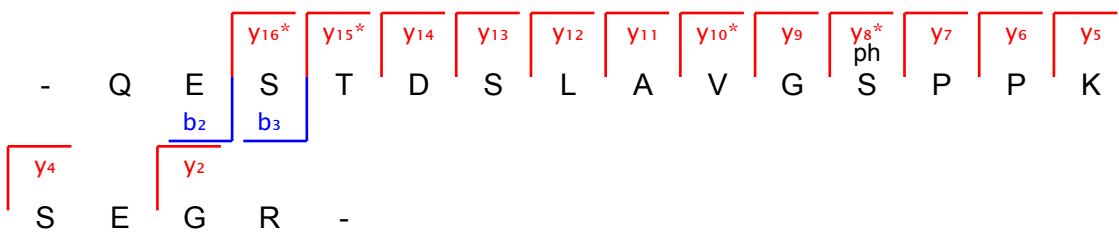

| Raw file         | Scan | Method    | Score | m/z    |
|------------------|------|-----------|-------|--------|
| 2013_COL15_30_34 | 8917 | FTMS; HCD | 69.98 | 553.58 |

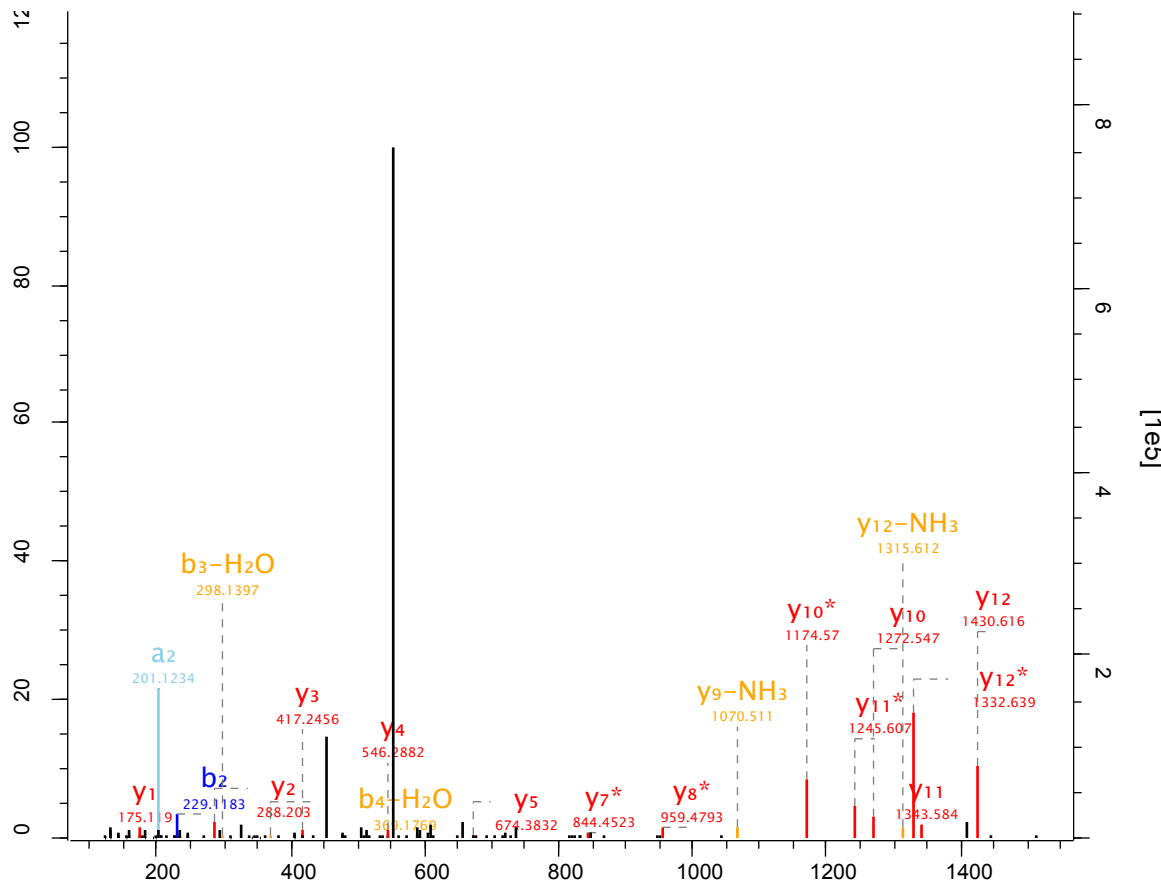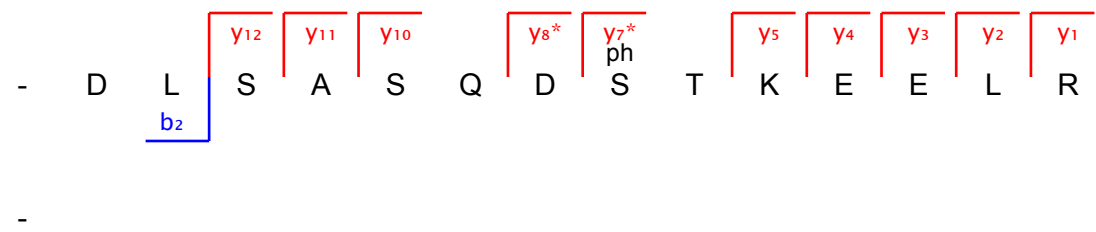

Raw file 2013\_COL15\_30\_34 Scan 9069 Method FTMS; HCD Score 318.69 m/z 823.36

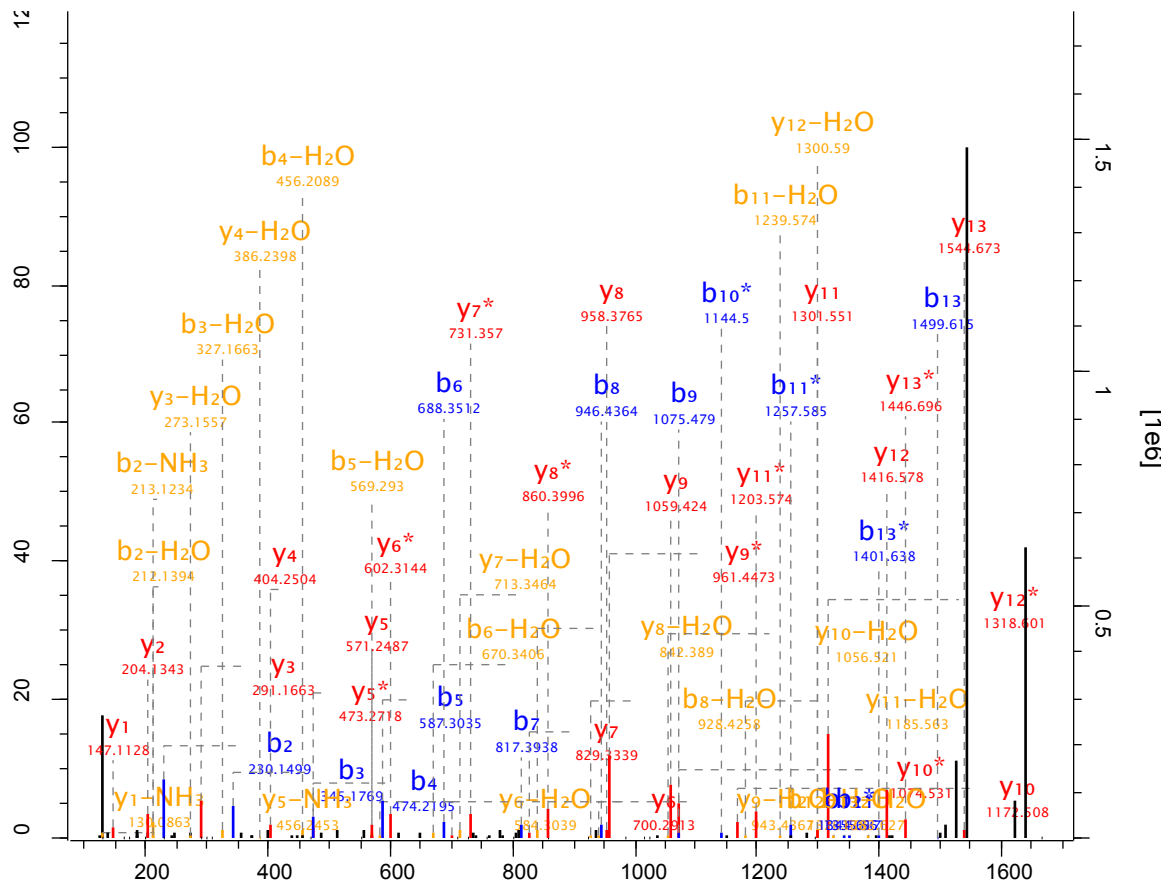

|   |                 |                 |                 |                 |                |                |                |                |                      |                 |                   |                 |                |
|---|-----------------|-----------------|-----------------|-----------------|----------------|----------------|----------------|----------------|----------------------|-----------------|-------------------|-----------------|----------------|
|   | y <sub>13</sub> | y <sub>12</sub> | y <sub>11</sub> | y <sub>10</sub> | y <sub>9</sub> | y <sub>8</sub> | y <sub>7</sub> | y <sub>6</sub> | y <sub>5</sub><br>ph | y <sub>4</sub>  | y <sub>3</sub>    | y <sub>2</sub>  | y <sub>1</sub> |
| T | K               | D               | E               | L               | T              | E              | E              | E              | S                    | L               | S                 | G               | K              |
|   | b <sub>2</sub>  | b <sub>3</sub>  | b <sub>4</sub>  | b <sub>5</sub>  | b <sub>6</sub> | b <sub>7</sub> | b <sub>8</sub> | b <sub>9</sub> | b <sub>10</sub> *    | b <sub>11</sub> | b <sub>12</sub> * | b <sub>13</sub> |                |

Raw file Scan Method Score m/z  
 2013\_COL15\_30\_34 9151 FTMS; HCD 60.02 417.18

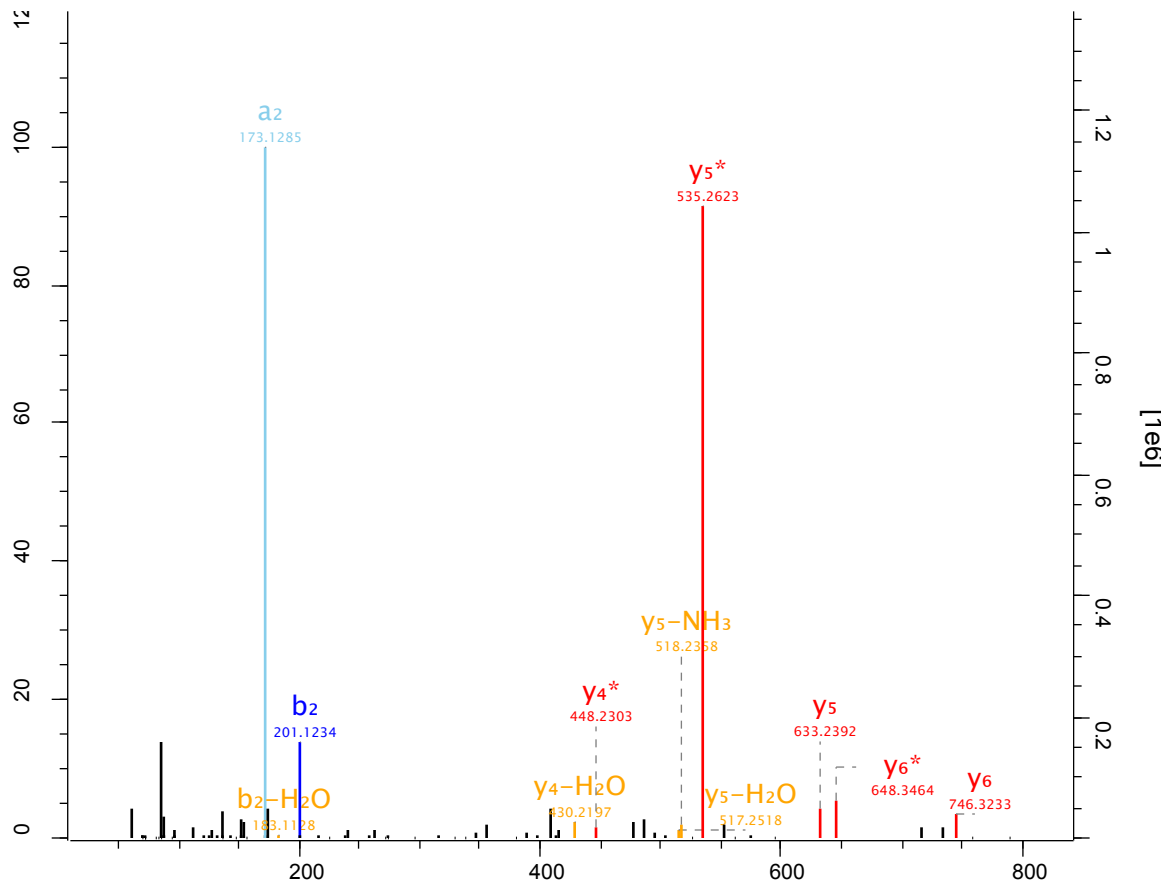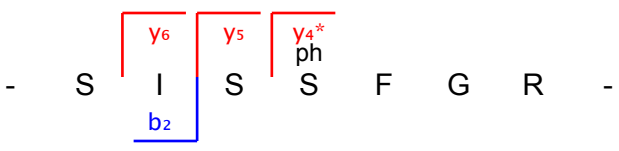

Raw file Scan Method Score m/z  
 2013\_COL15\_30\_34 9223 FTMS; HCD 216.13 714.8

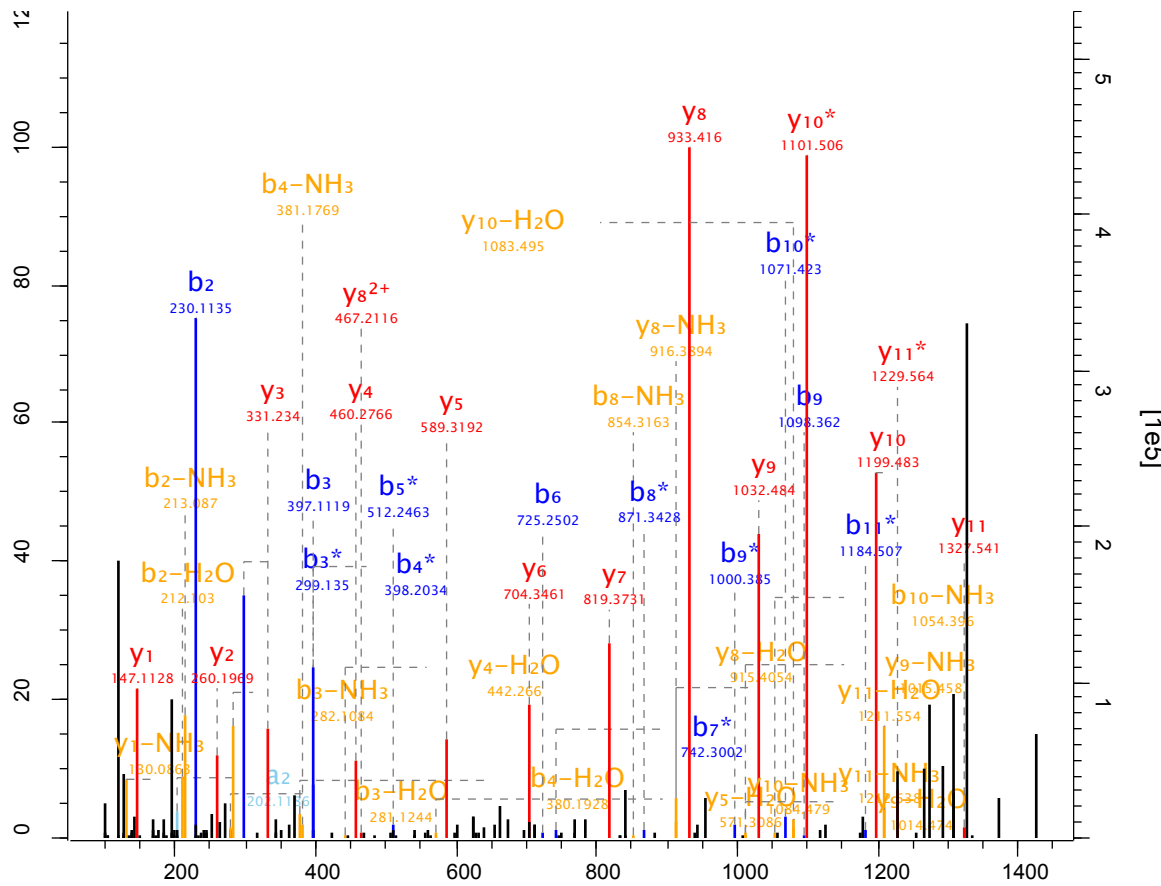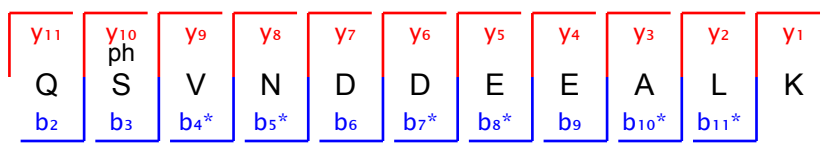

Raw file 2013\_COL15\_30\_34 Scan 9390 Method FTMS; HCD Score 113.31 m/z 736.32

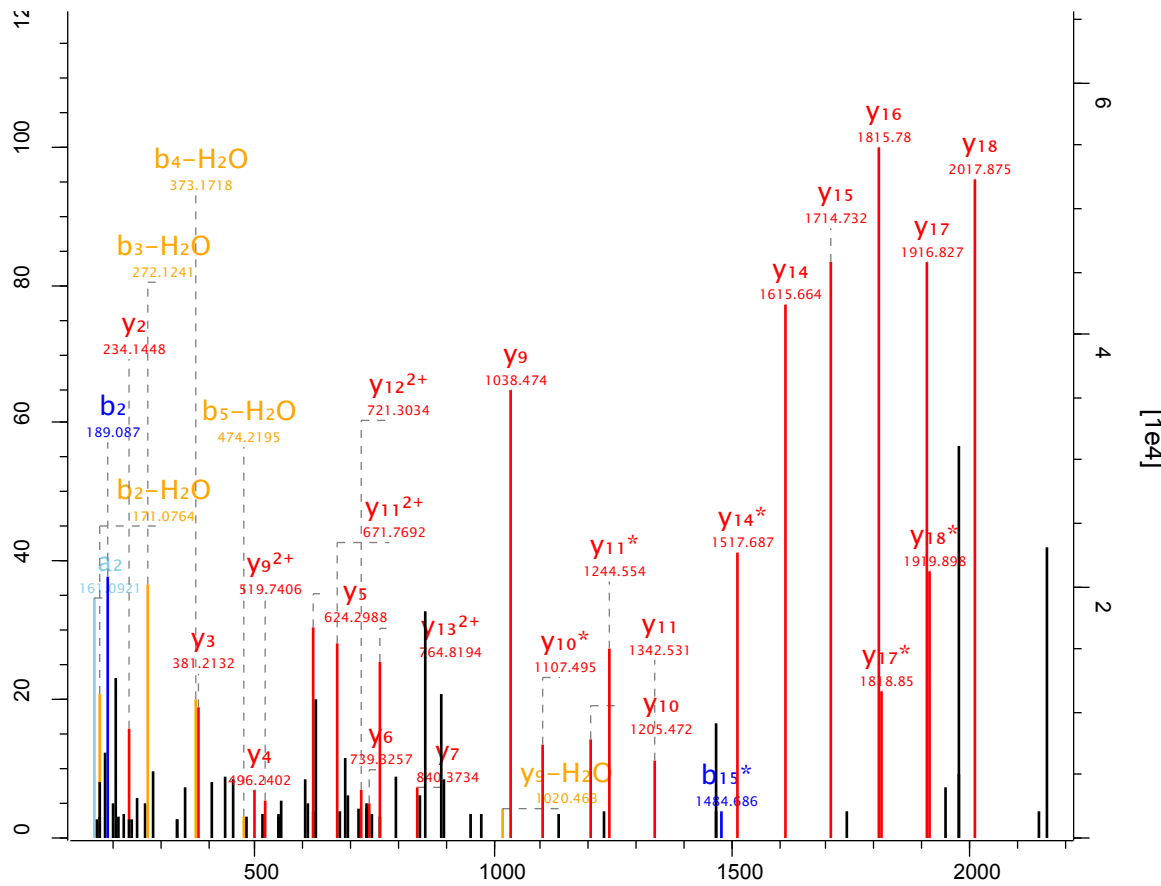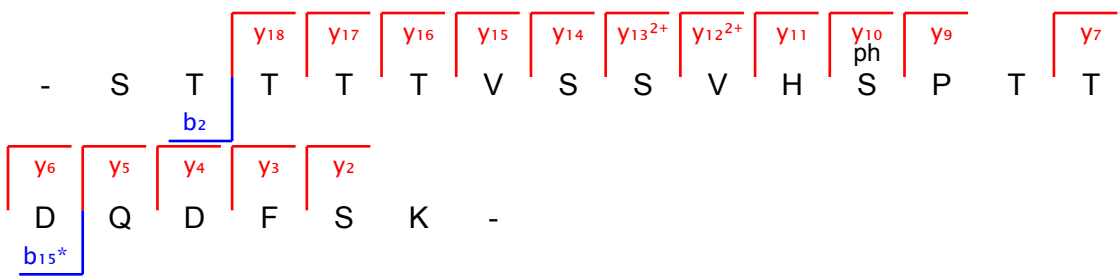

Raw file Scan Method Score m/z  
2013\_COL15\_30\_34 9659 FTMS; HCD 113.69 586.26

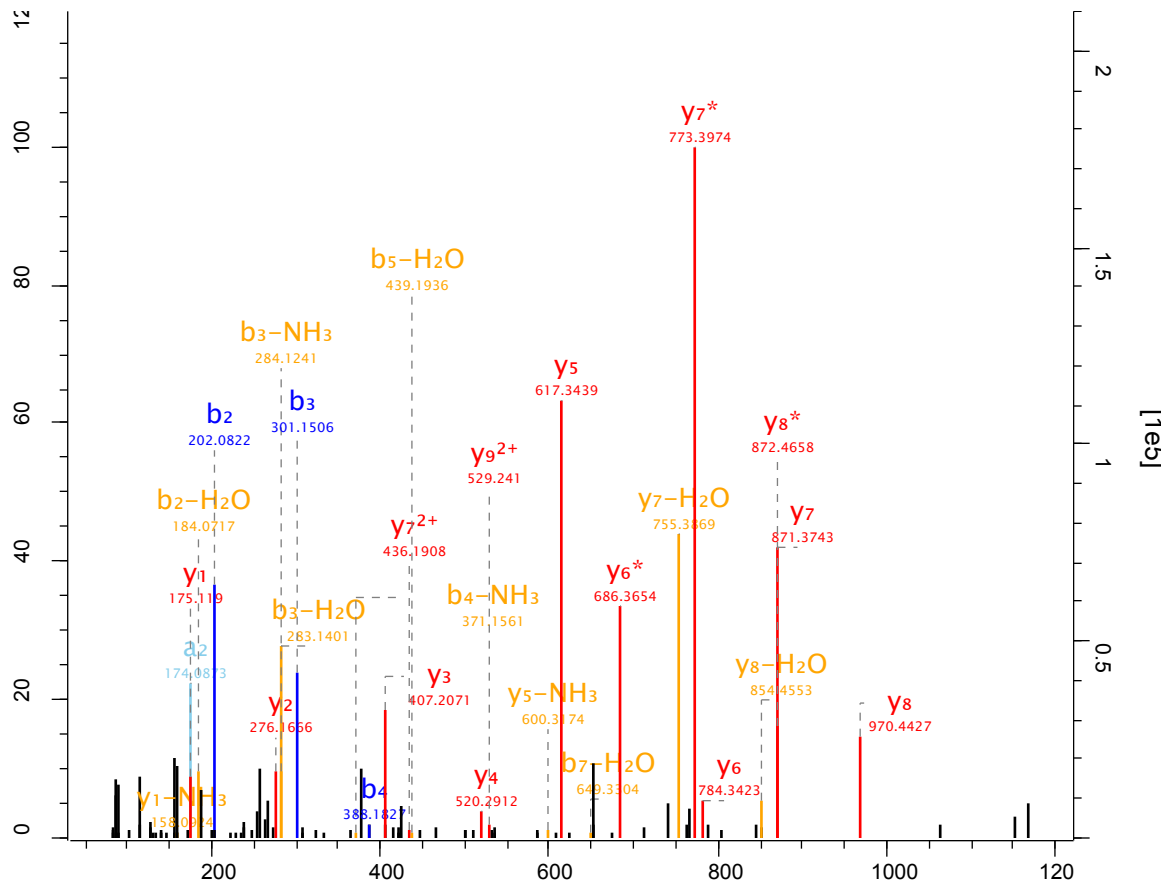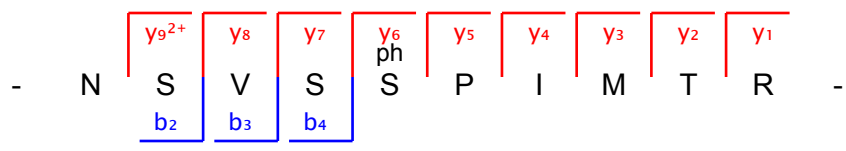



| Raw file         | Scan | Method    | Score | m/z    |
|------------------|------|-----------|-------|--------|
| 2013_COL15_30_34 | 9720 | FTMS; HCD | 120.7 | 523.94 |

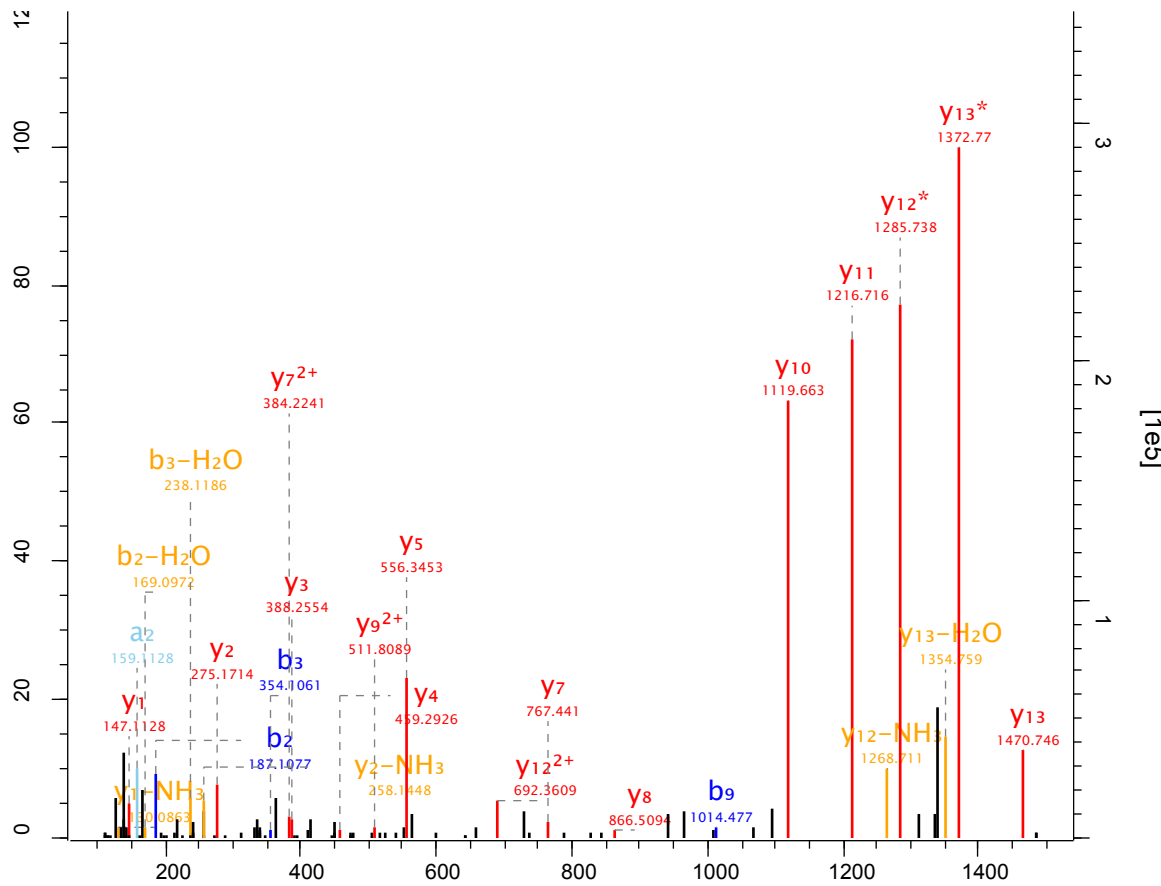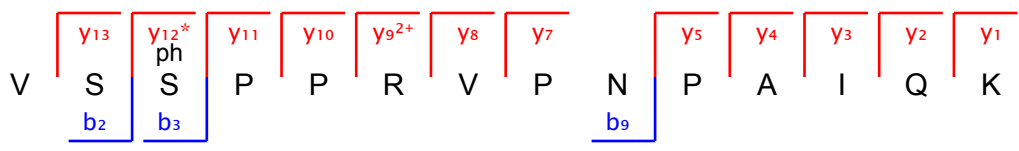

Raw file Scan Method Score m/z  
 2013\_COL15\_30\_34 9819 FTMS; HCD 77.22 786.85

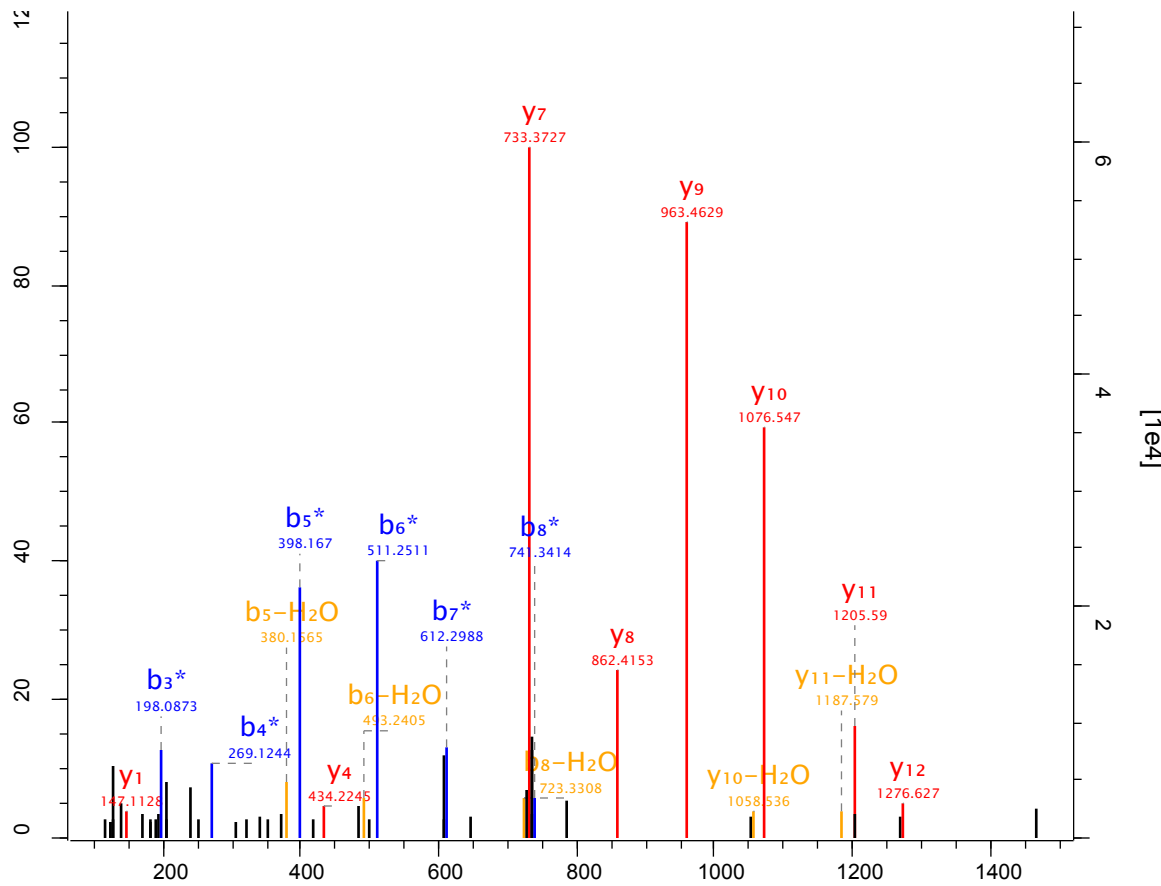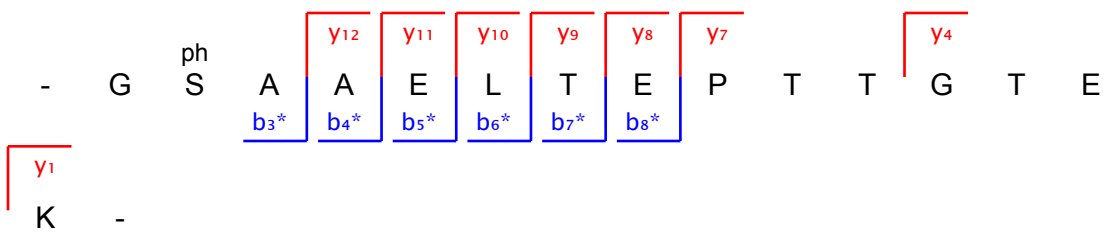

Raw file Scan Method Score m/z  
 2013\_COL15\_30\_34 9834 FTMS; HCD 161.47 638.3

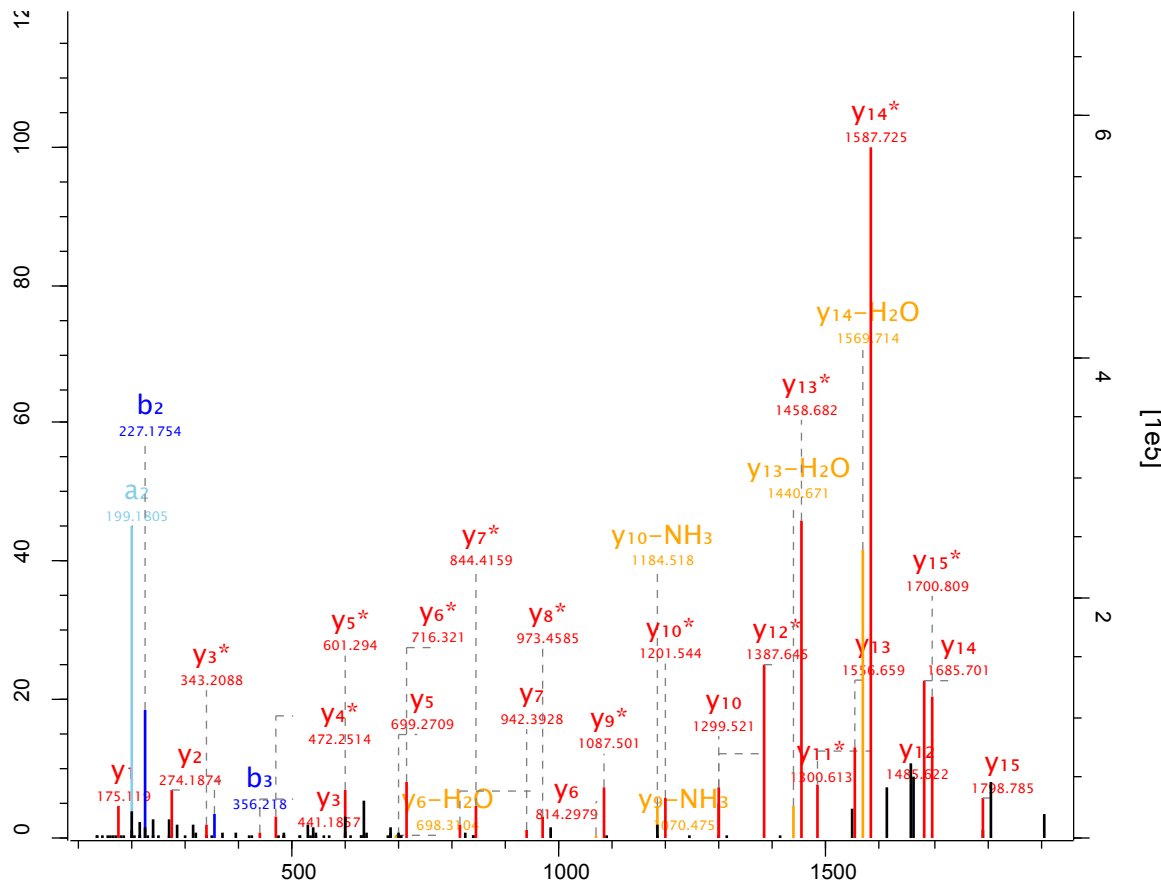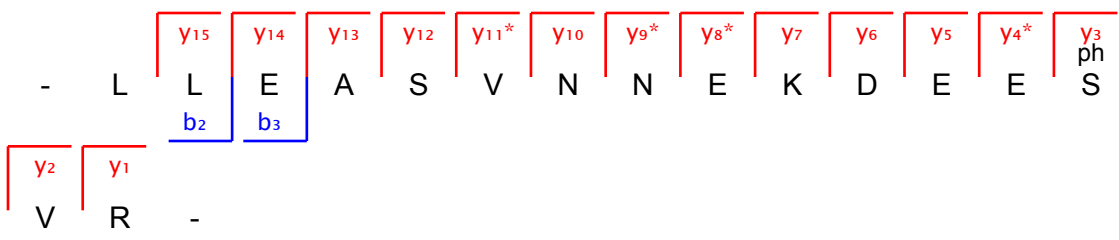

| Raw file         | Scan | Method    | Score | m/z    |
|------------------|------|-----------|-------|--------|
| 2013_COL15_30_34 | 9866 | FTMS; HCD | 40.99 | 897.38 |

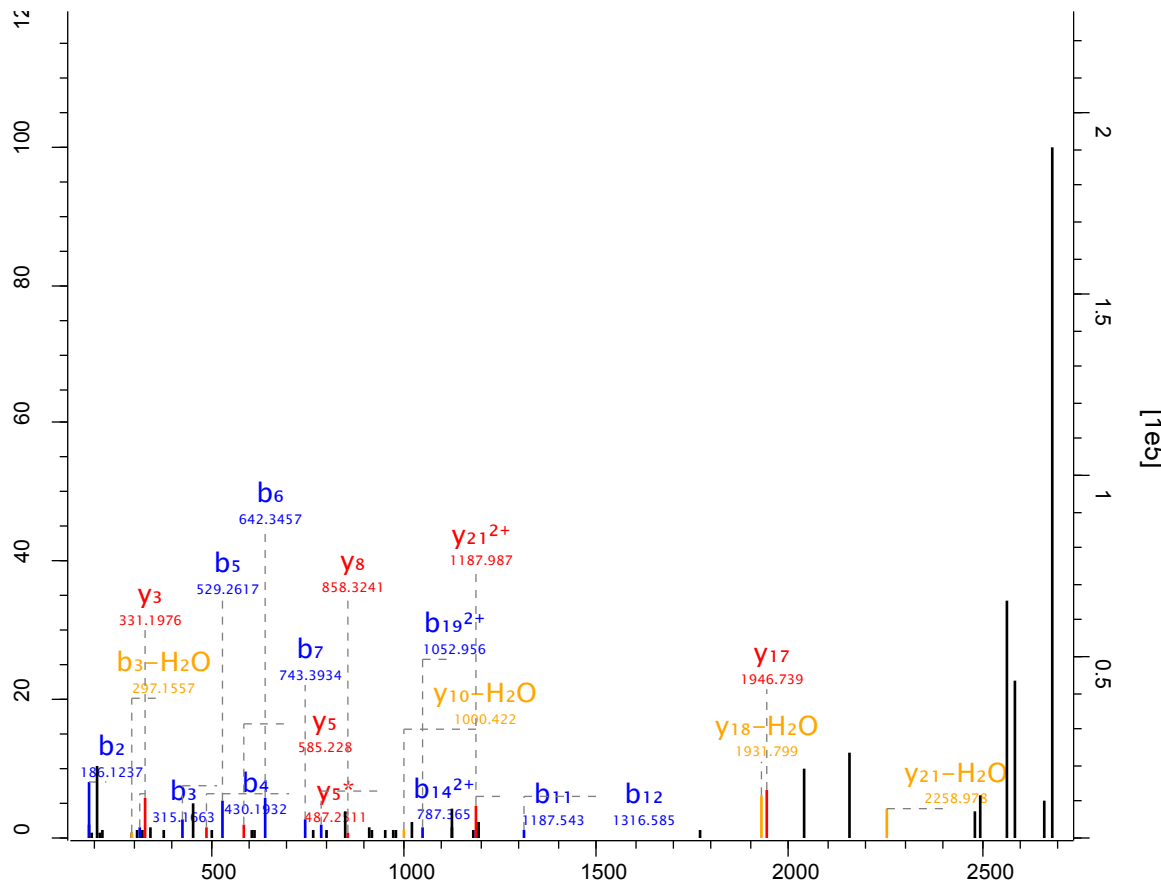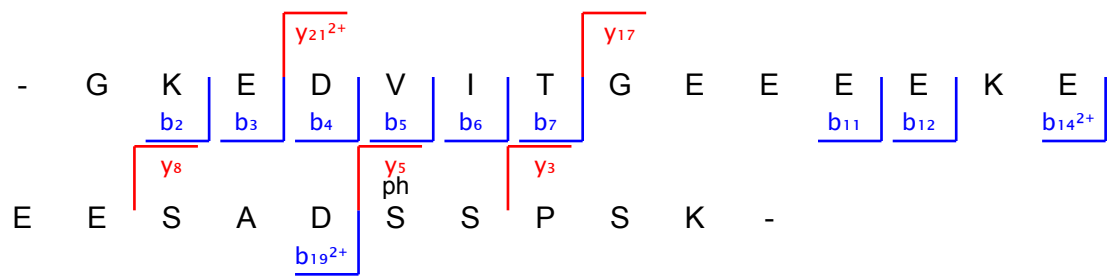

| Raw file         | Scan | Method    | Score | m/z    |
|------------------|------|-----------|-------|--------|
| 2013_COL15_30_34 | 9895 | FTMS; HCD | 46.16 | 509.74 |

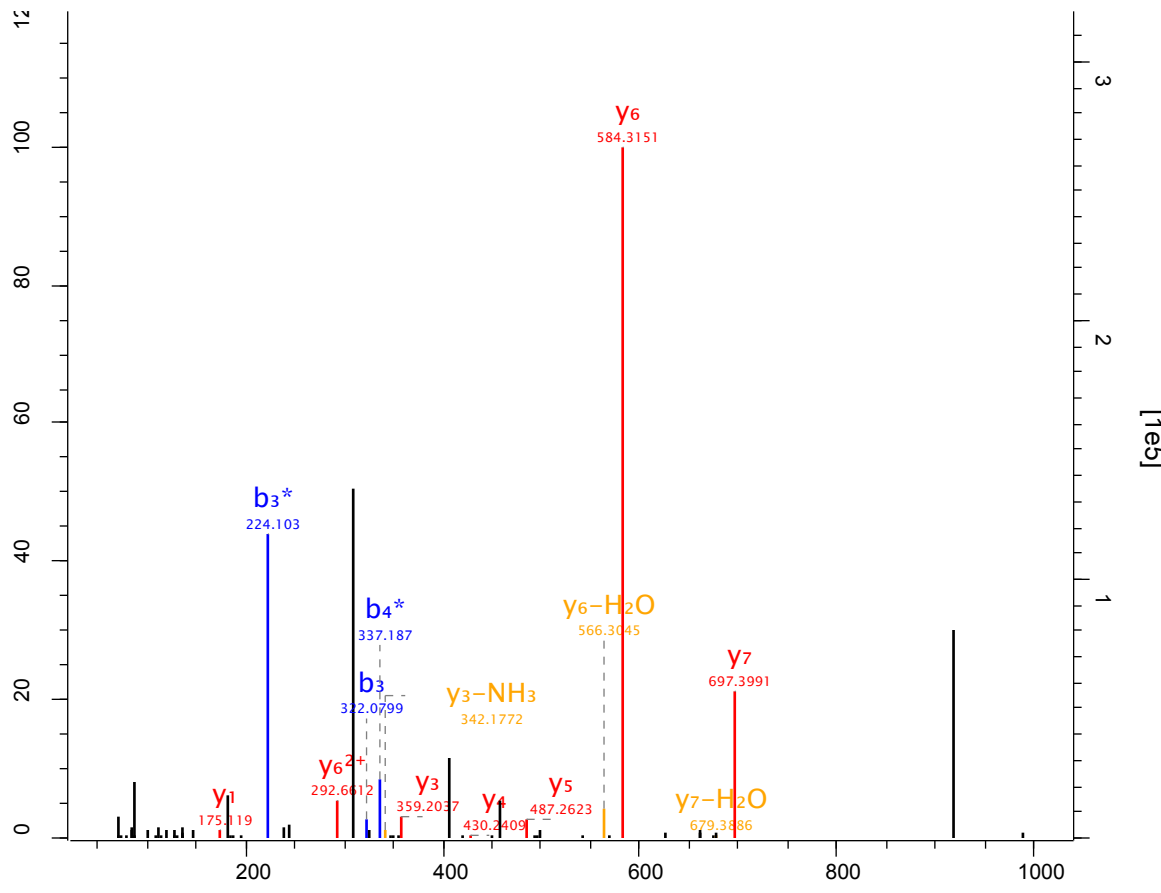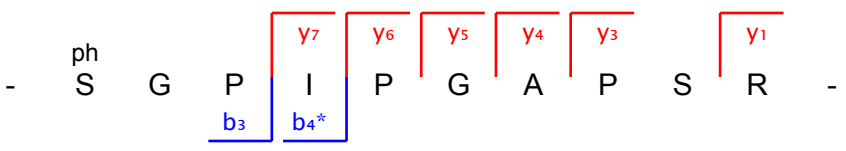

| Raw file         | Scan | Method    | Score | m/z    |
|------------------|------|-----------|-------|--------|
| 2013_COL15_30_34 | 9982 | FTMS; HCD | 46    | 580.28 |

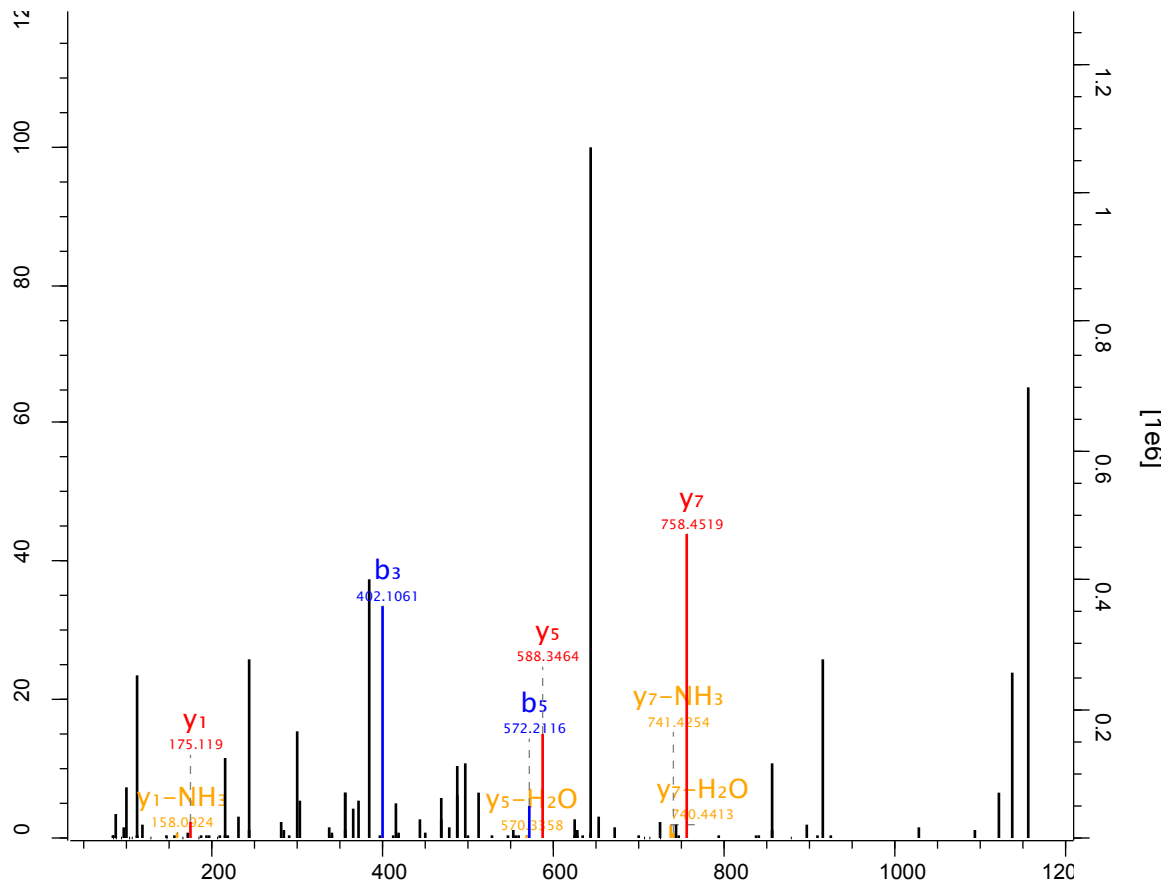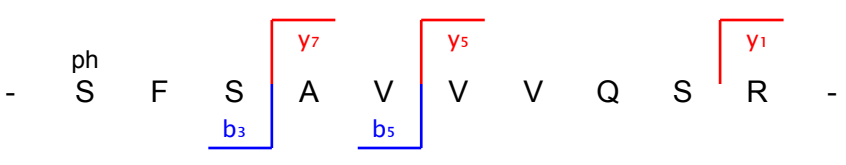

Raw file Scan Method Score m/z

2013\_COL15\_34\_38\_151128201608

10040

FTMS; HCD

46.42

645.61

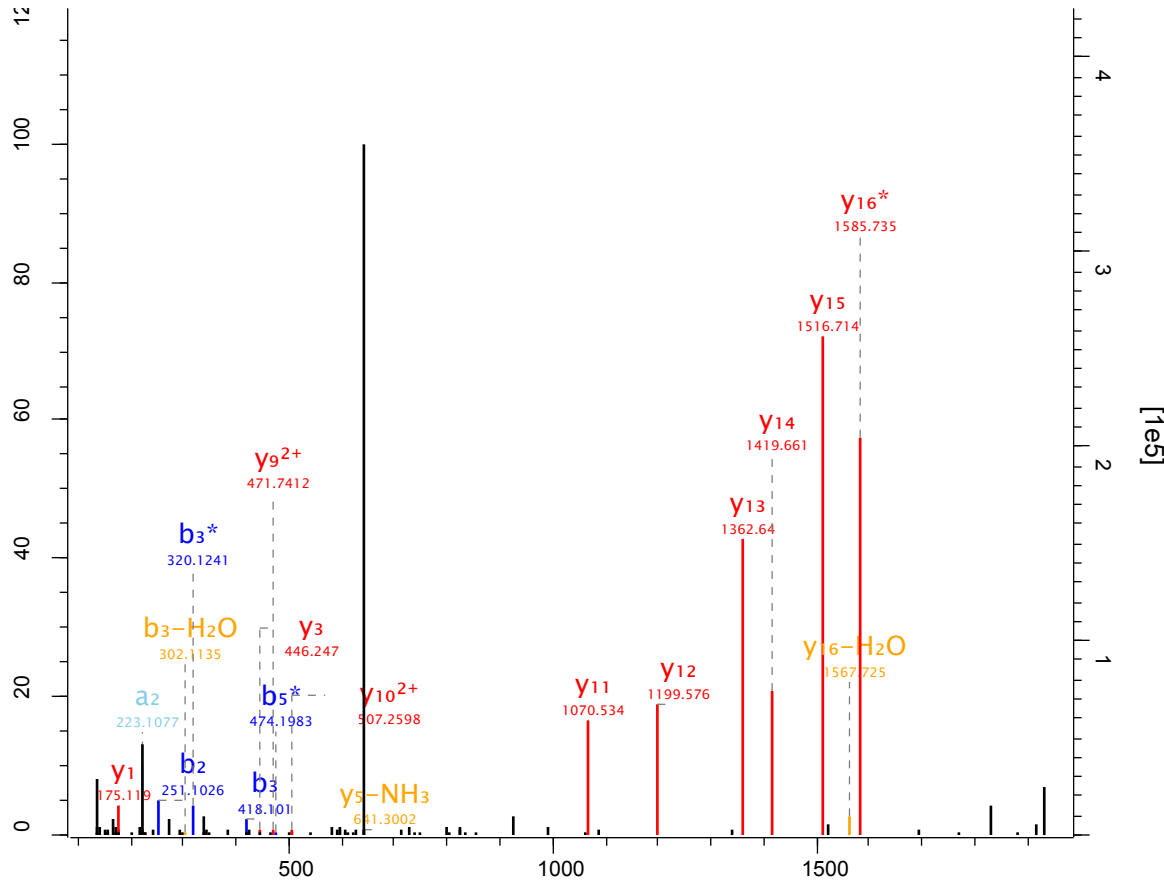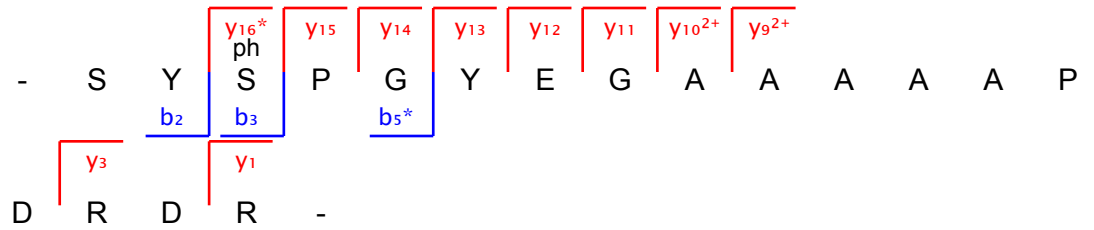

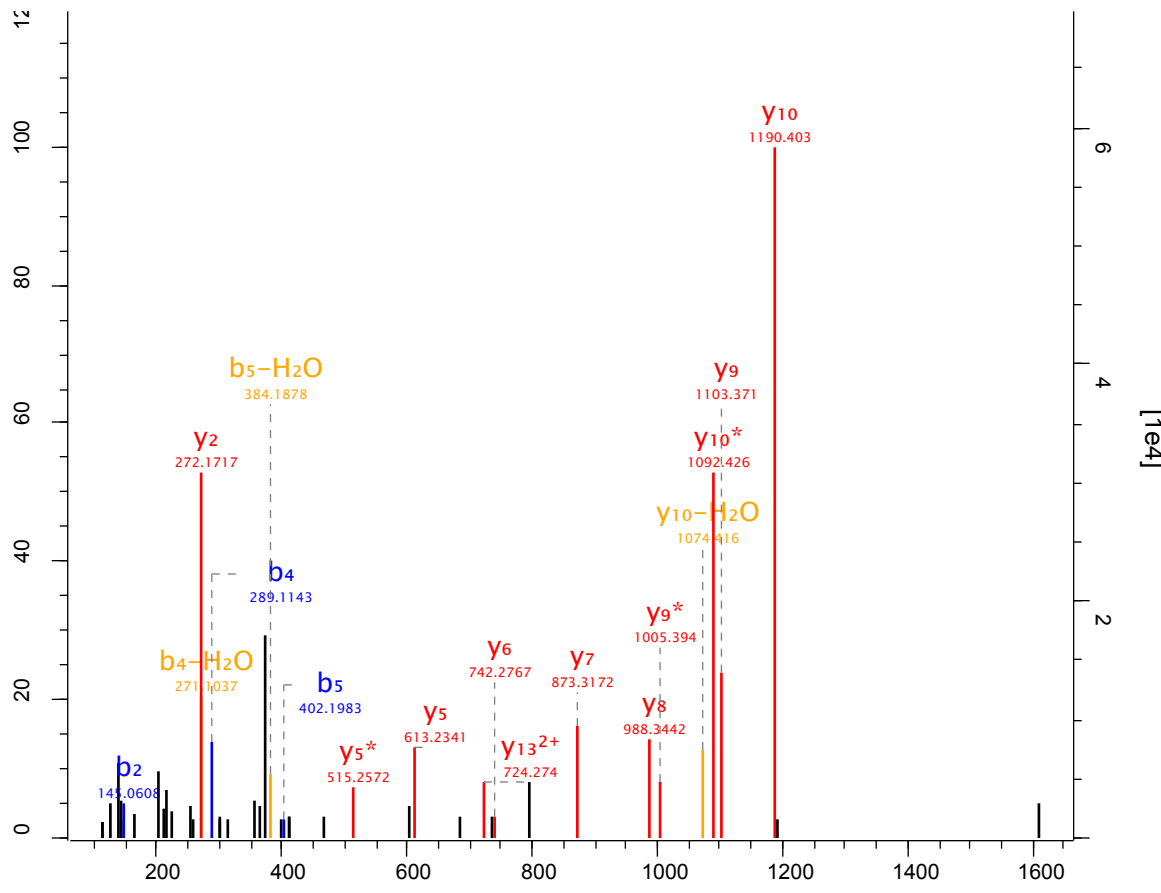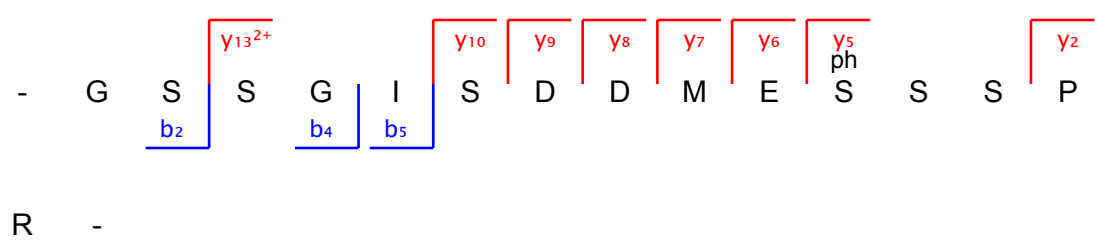



Raw file Scan Method Score m/z  
 2013\_COL15\_34\_38\_151128201608 10221 FTMS; HCD 69.72 435.7

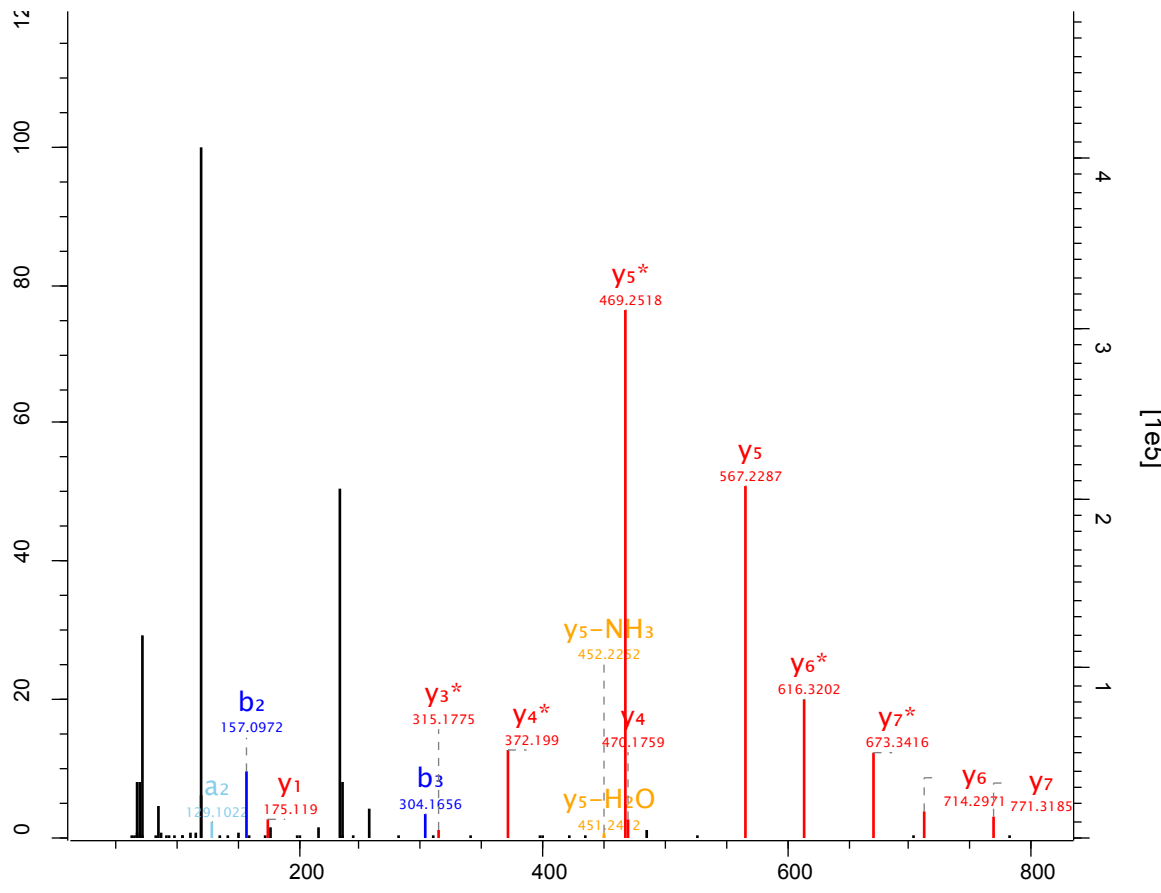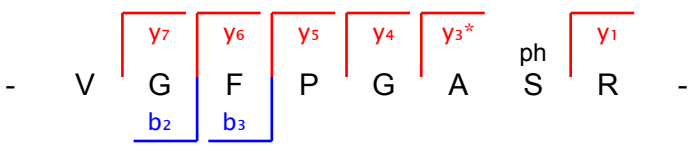

Raw file Scan Method Score m/z  
 2013\_COL15\_34\_38\_151128201608 10246 FTMS; HCD 77.75 647.81

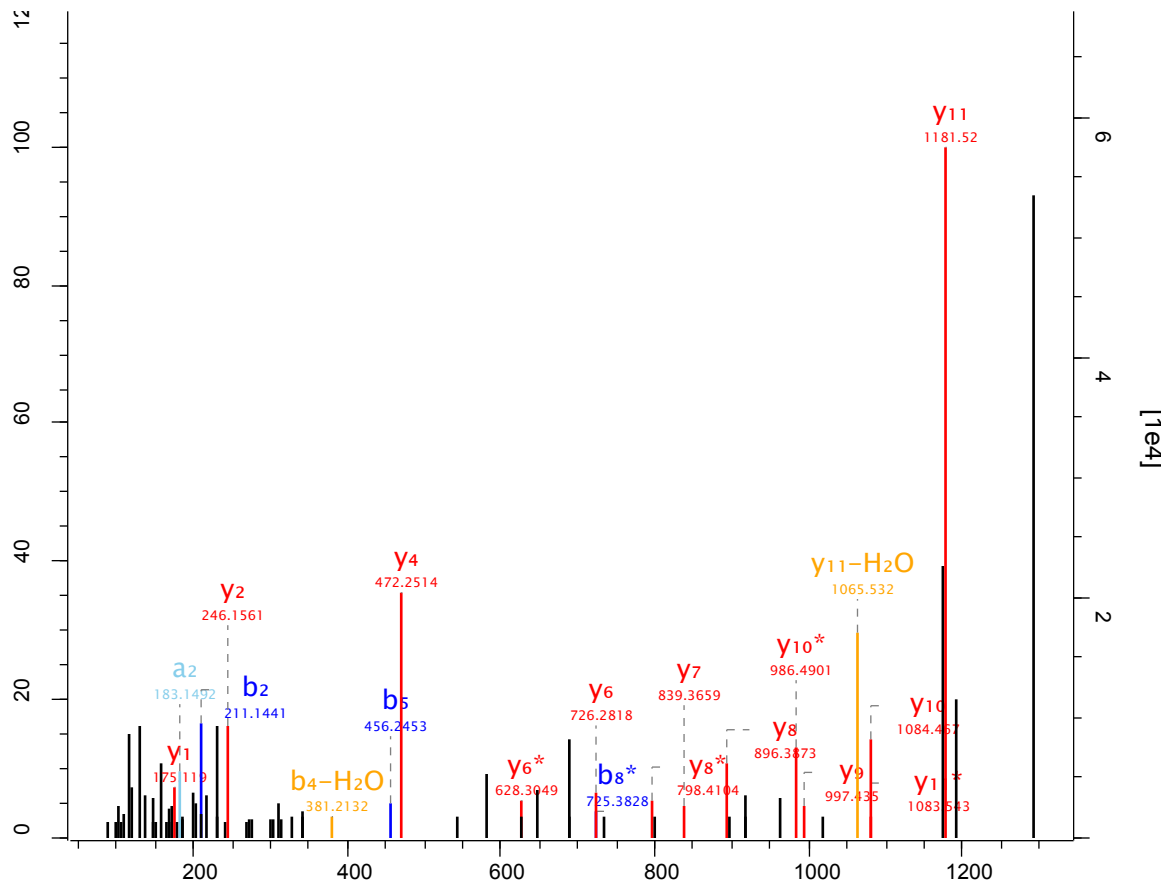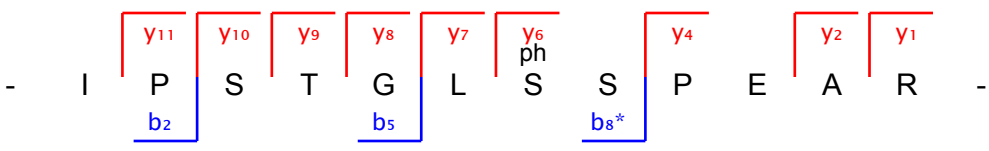

2013\_COL15\_34\_38\_151128201608

10369

FTMS; HCD

101.01

717.34

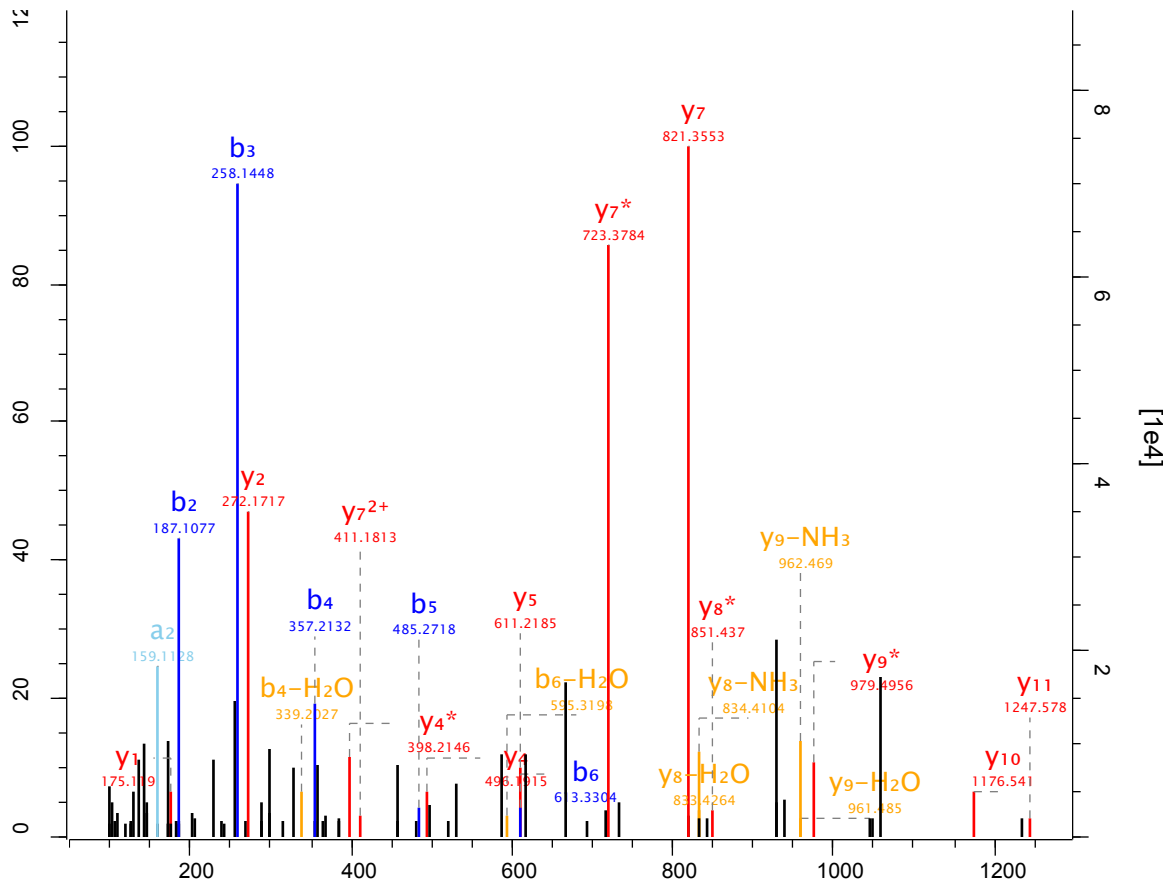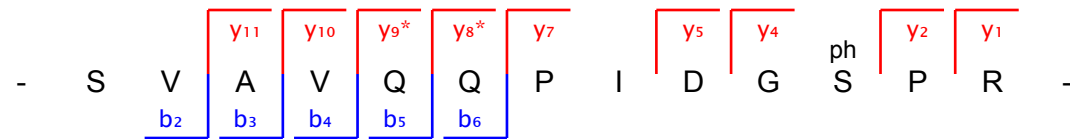

Raw file  
 2013\_COL15\_34\_38\_151128201608

Scan  
 10371

Method  
 FTMS; HCD

Score  
 122.33

m/z  
 710.84

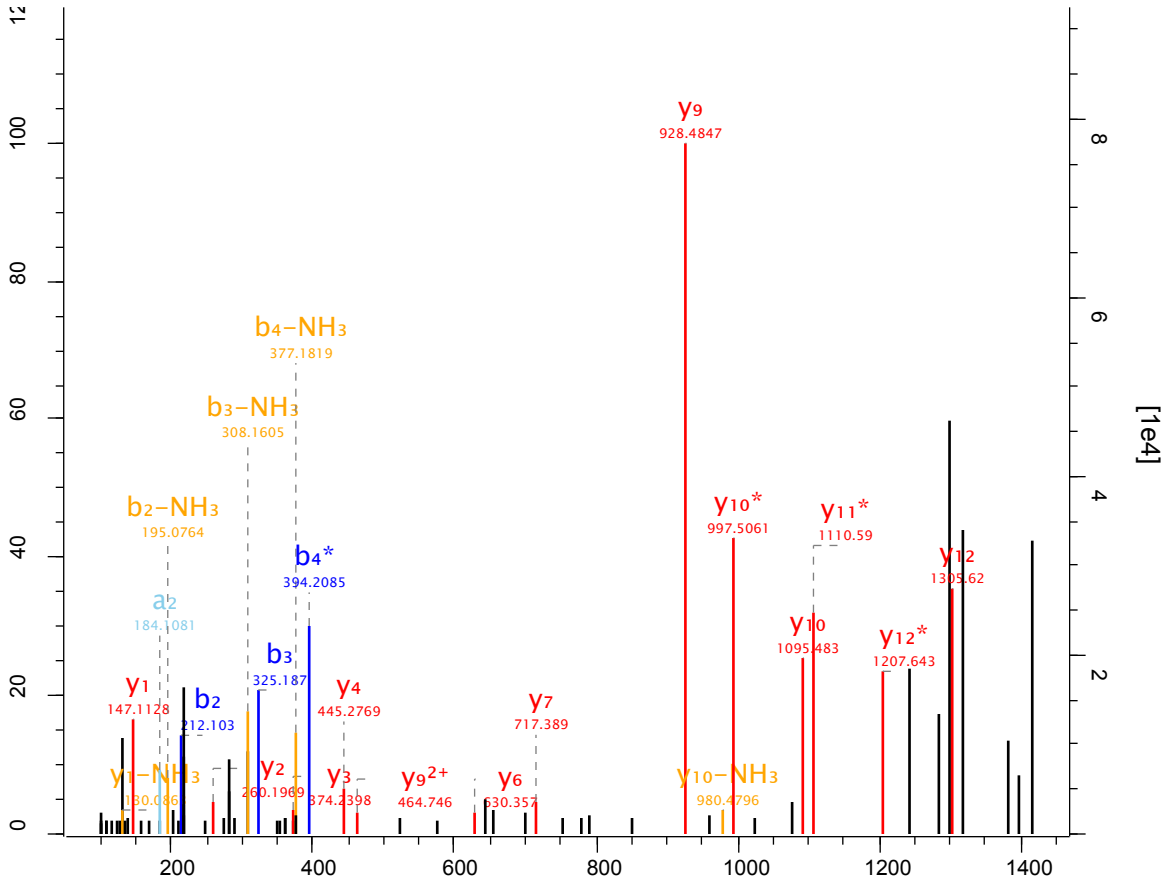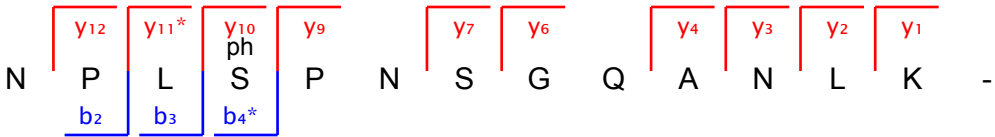

2013\_COL15\_34\_38\_151128201608

10397

FTMS; HCD

92.26

767.38

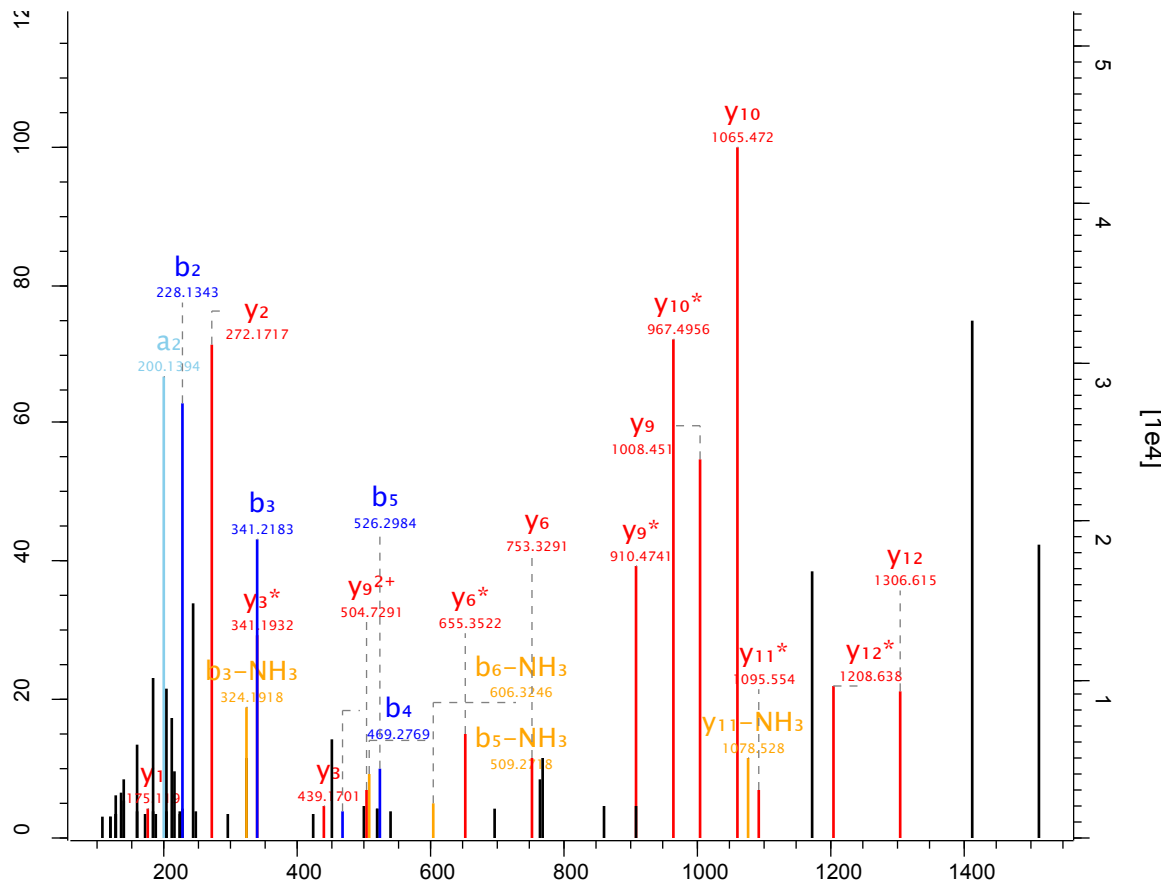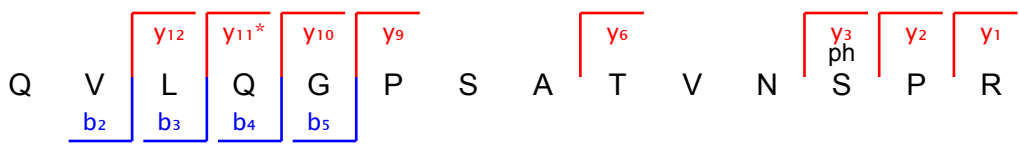

Raw file 2013\_COL15\_34\_38\_151128201608 Scan 10443 Method FTMS; HCD Score 95.2 m/z 637.96

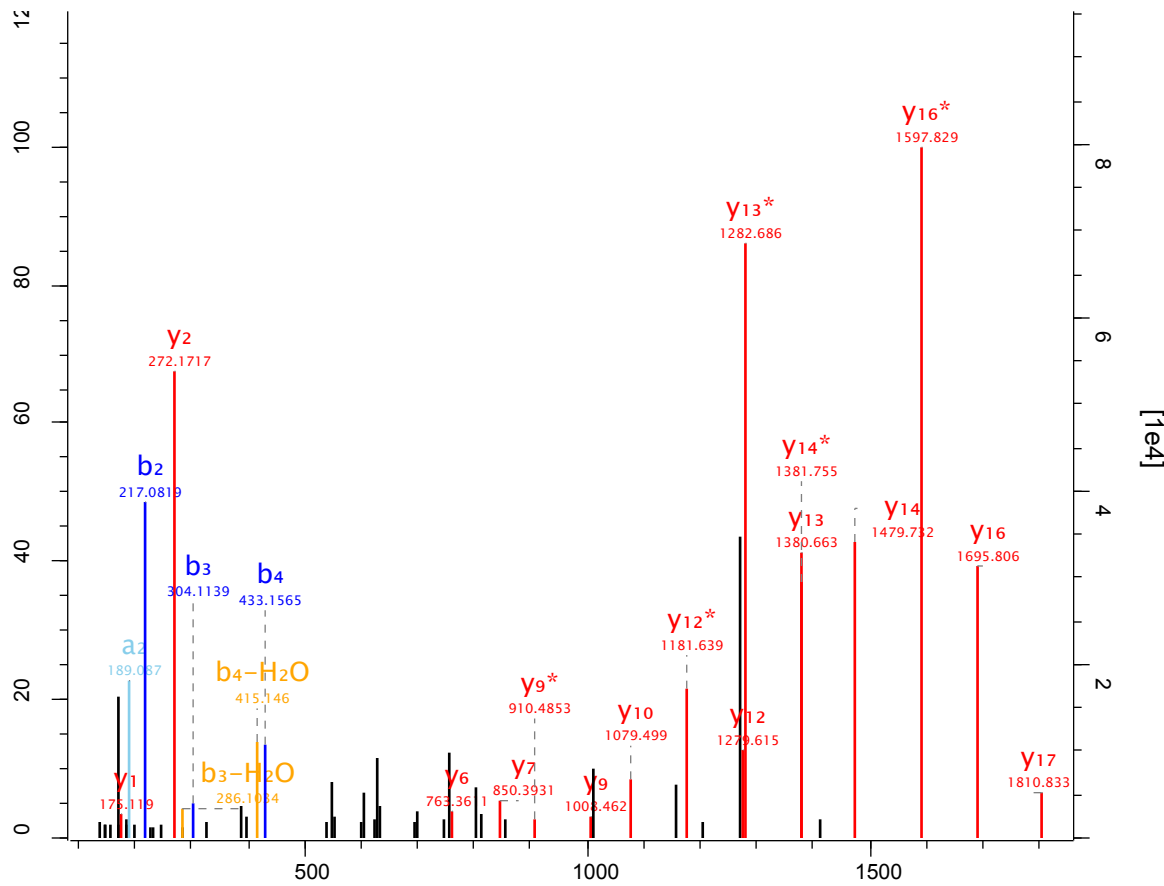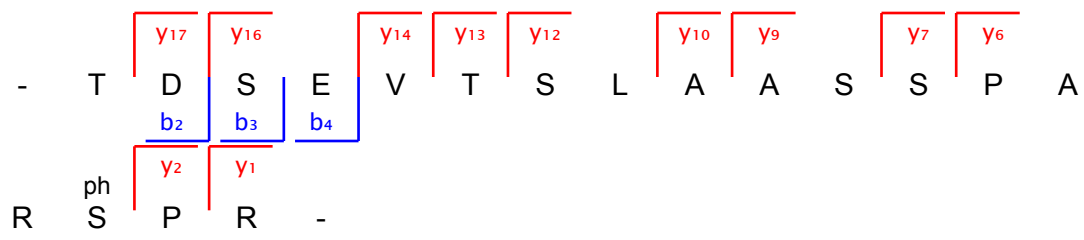

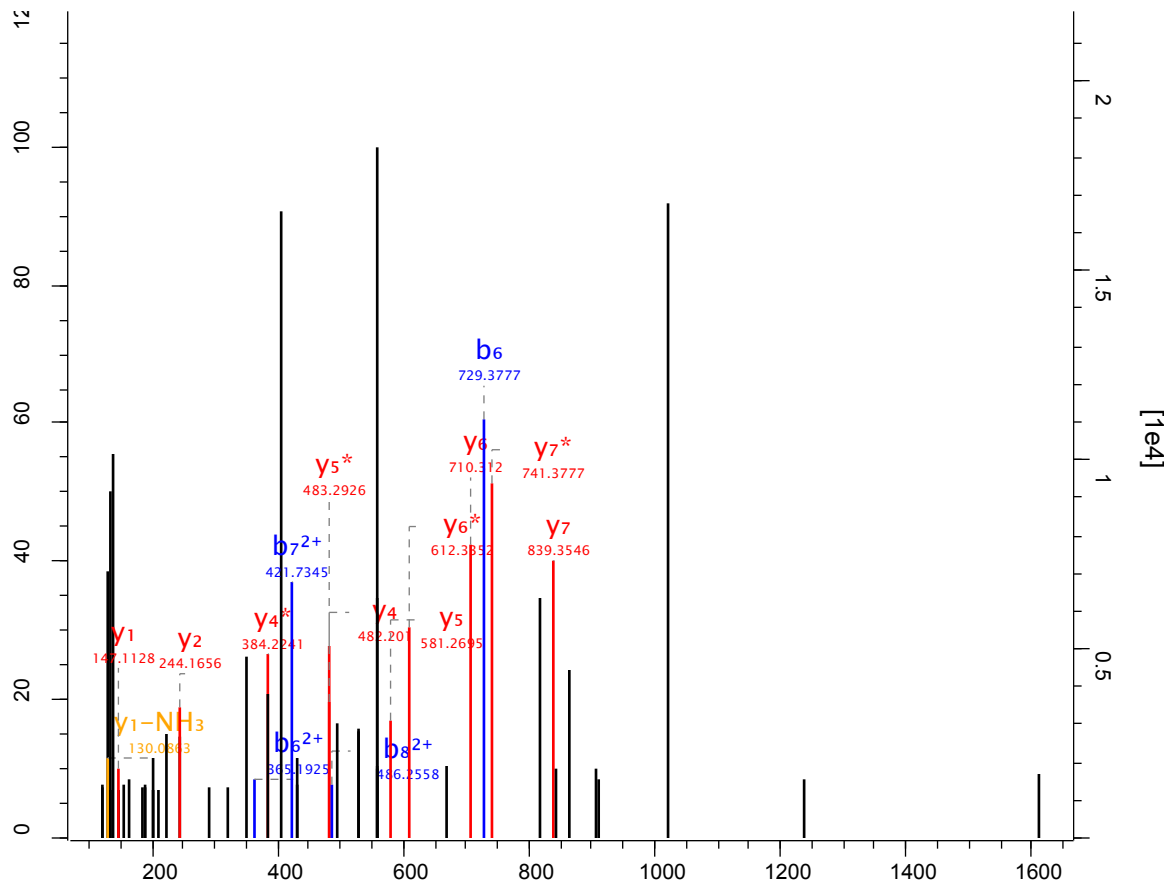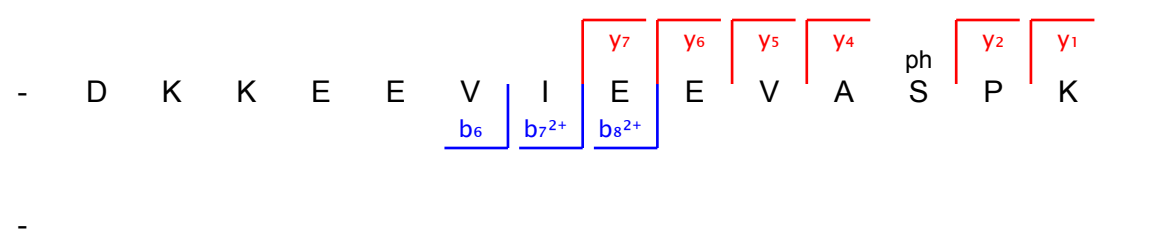

2013\_COL15\_34\_38\_151128201608

10461

FTMS; HCD

74.03

969.9

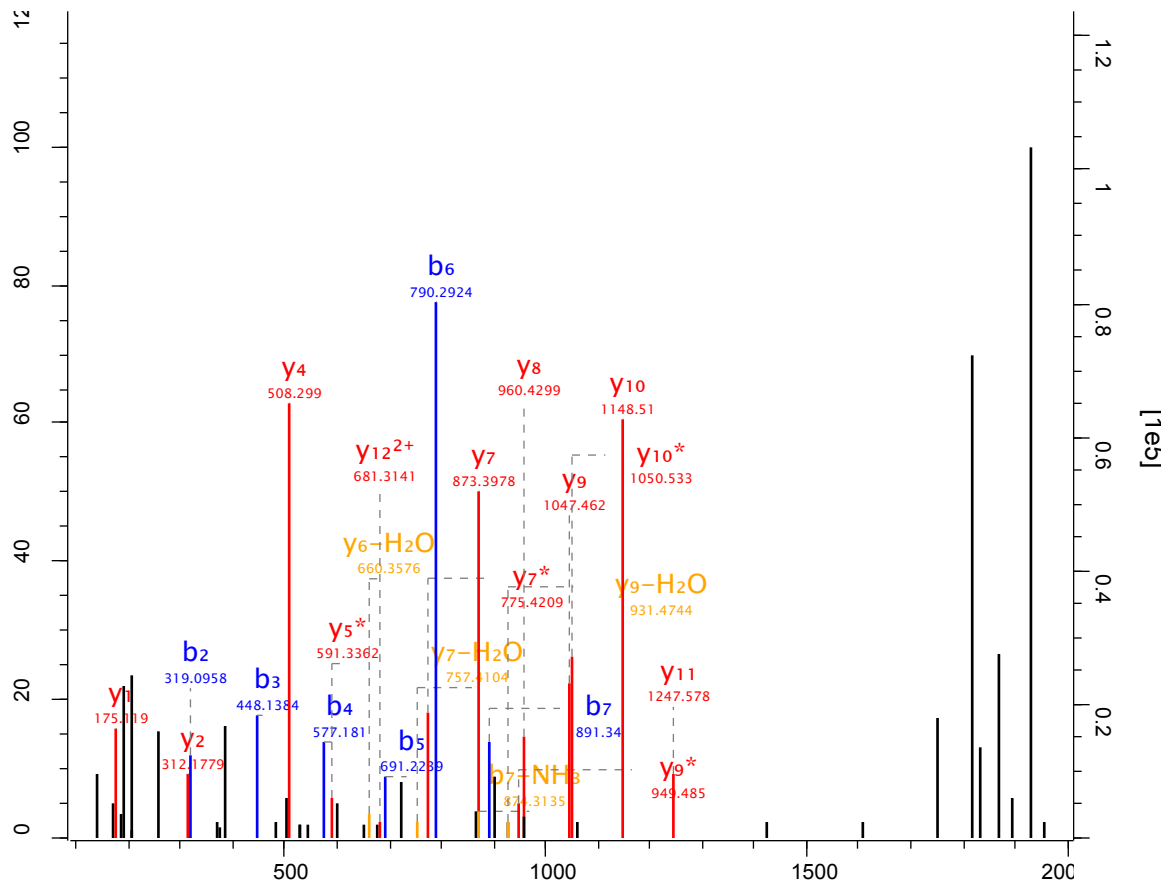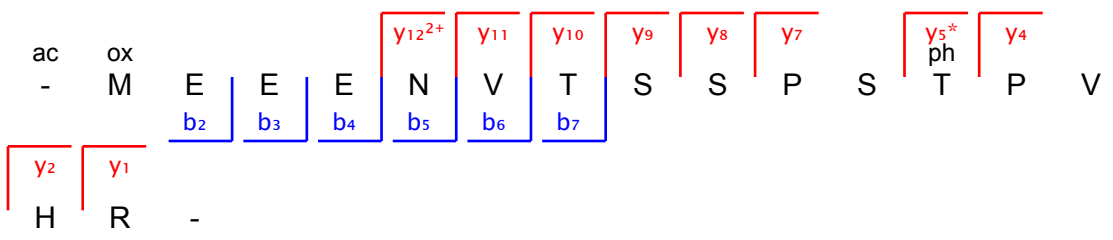



2013\_COL15\_34\_38\_151128201608

10475

FTMS; HCD

40.8

684.79

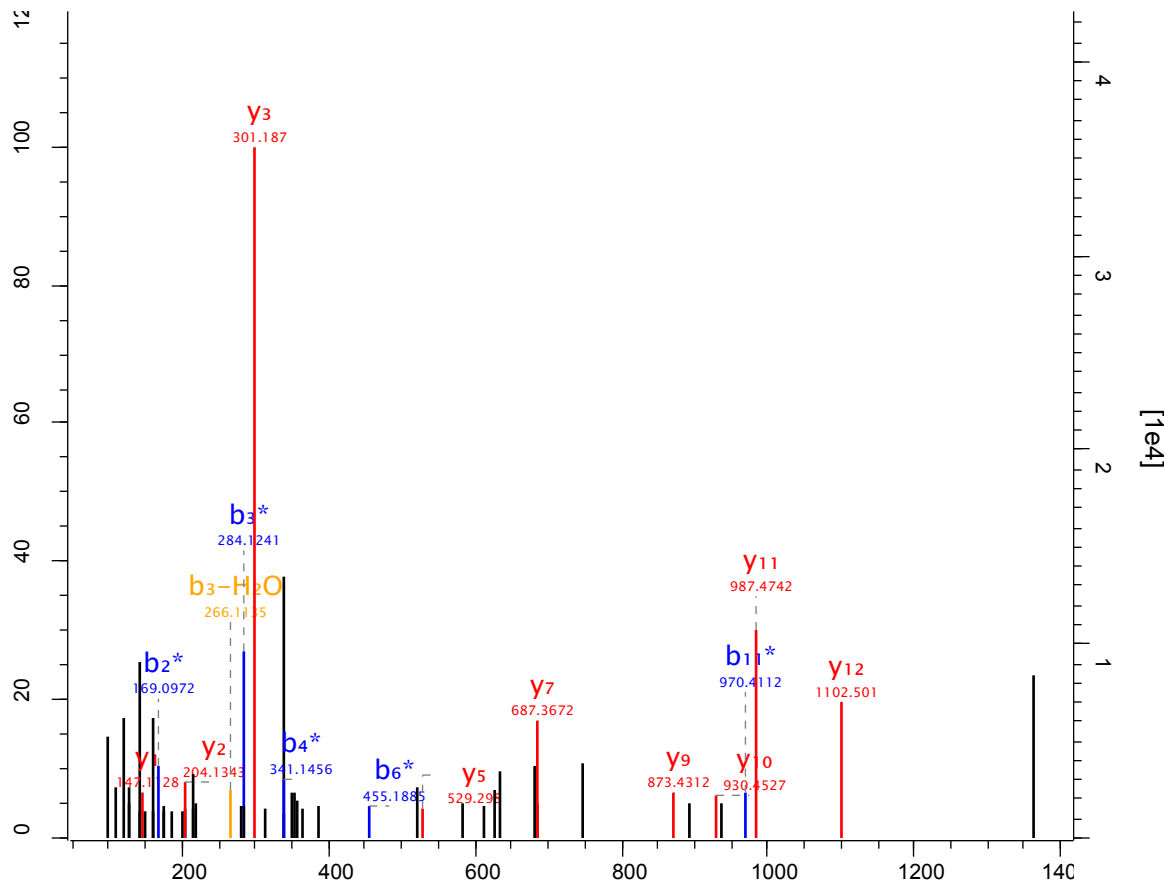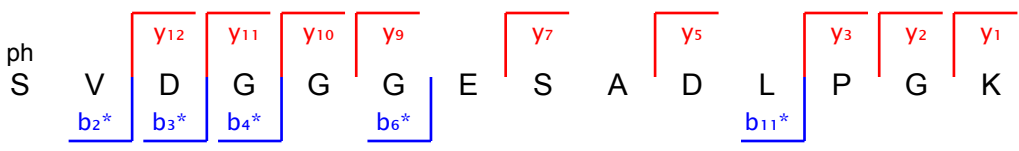

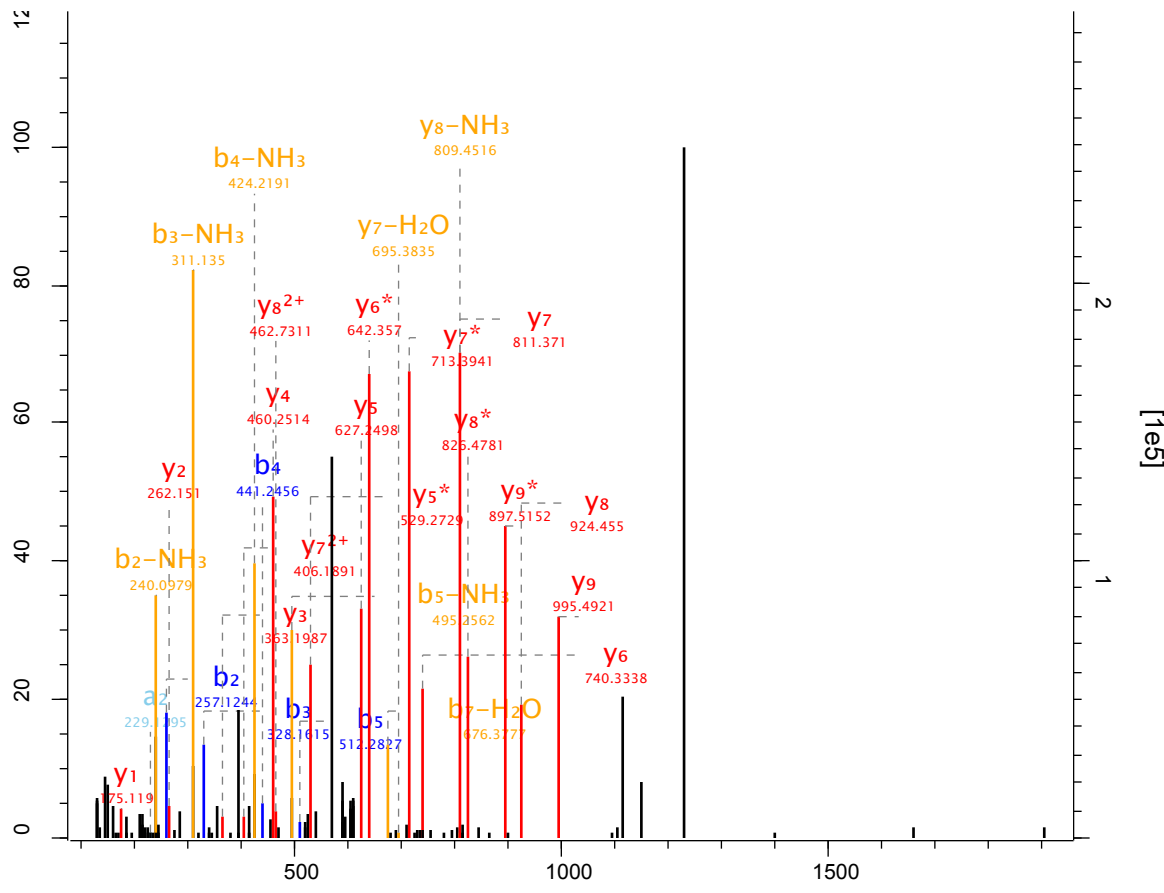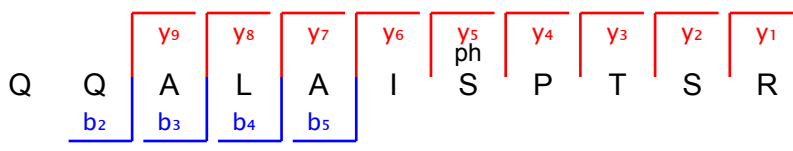

Raw file Scan Method Score m/z  
 2013\_COL15\_34\_38\_151128201608 10587 FTMS; HCD 64.52 692.82

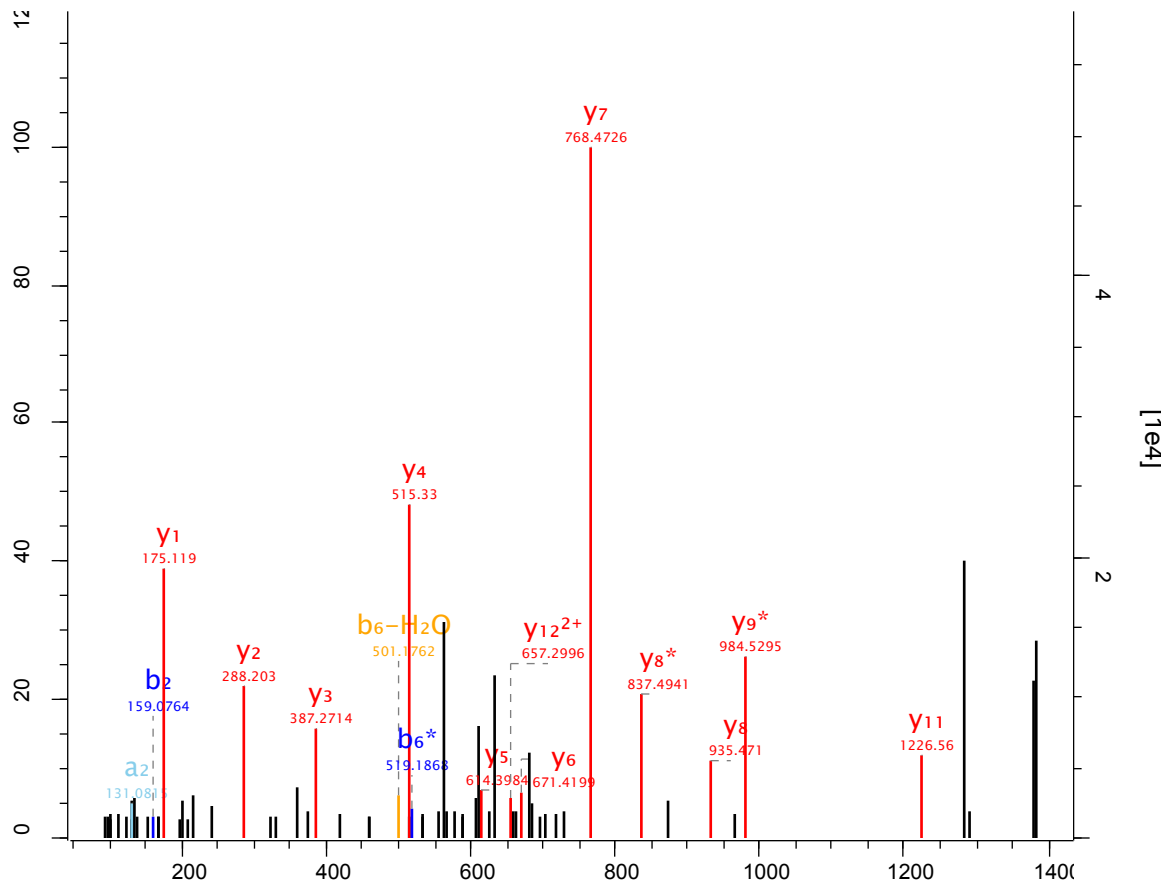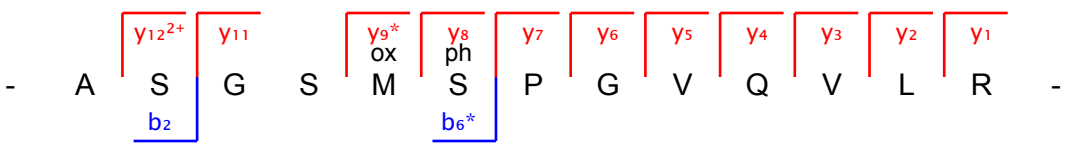

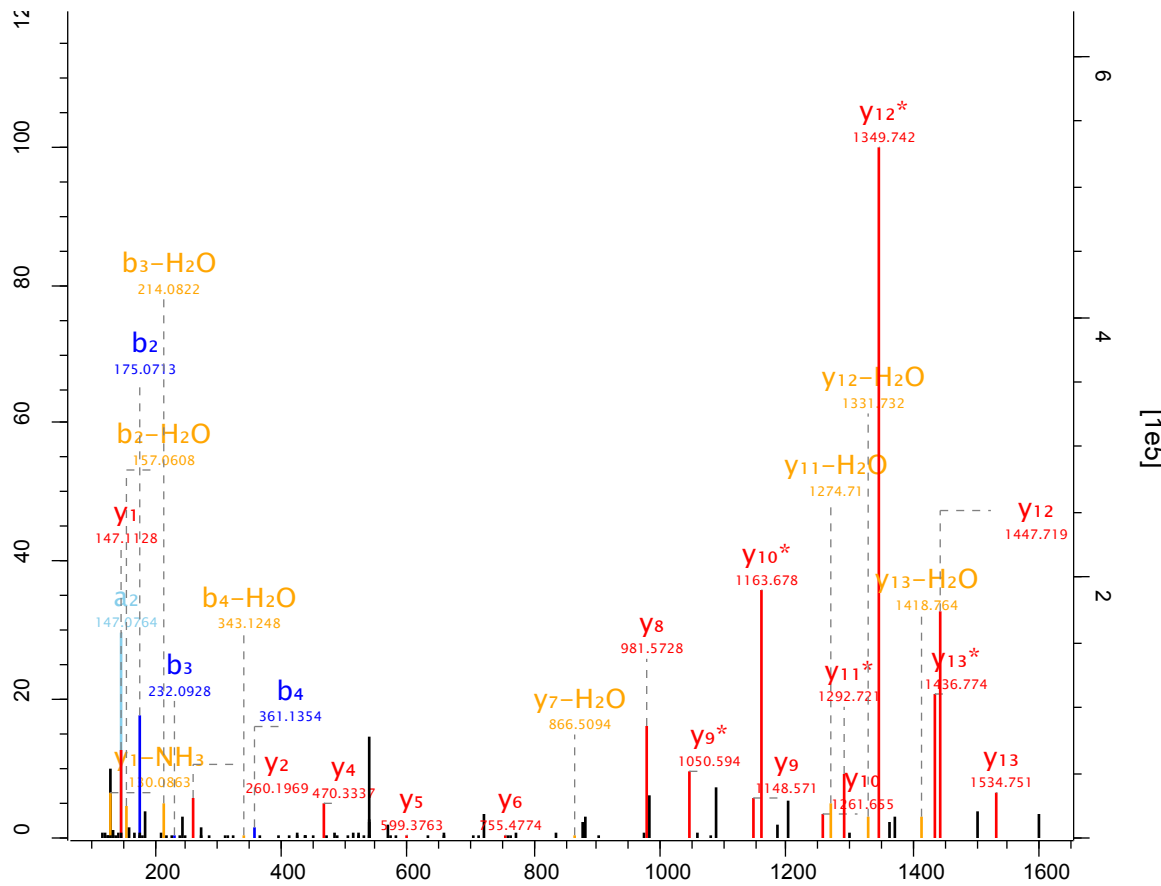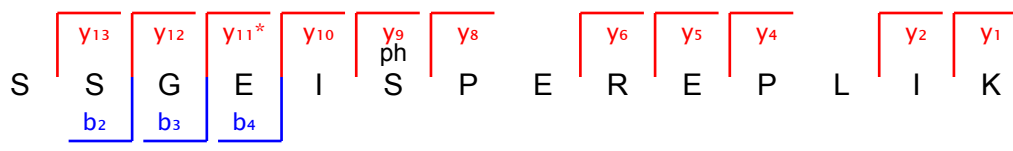

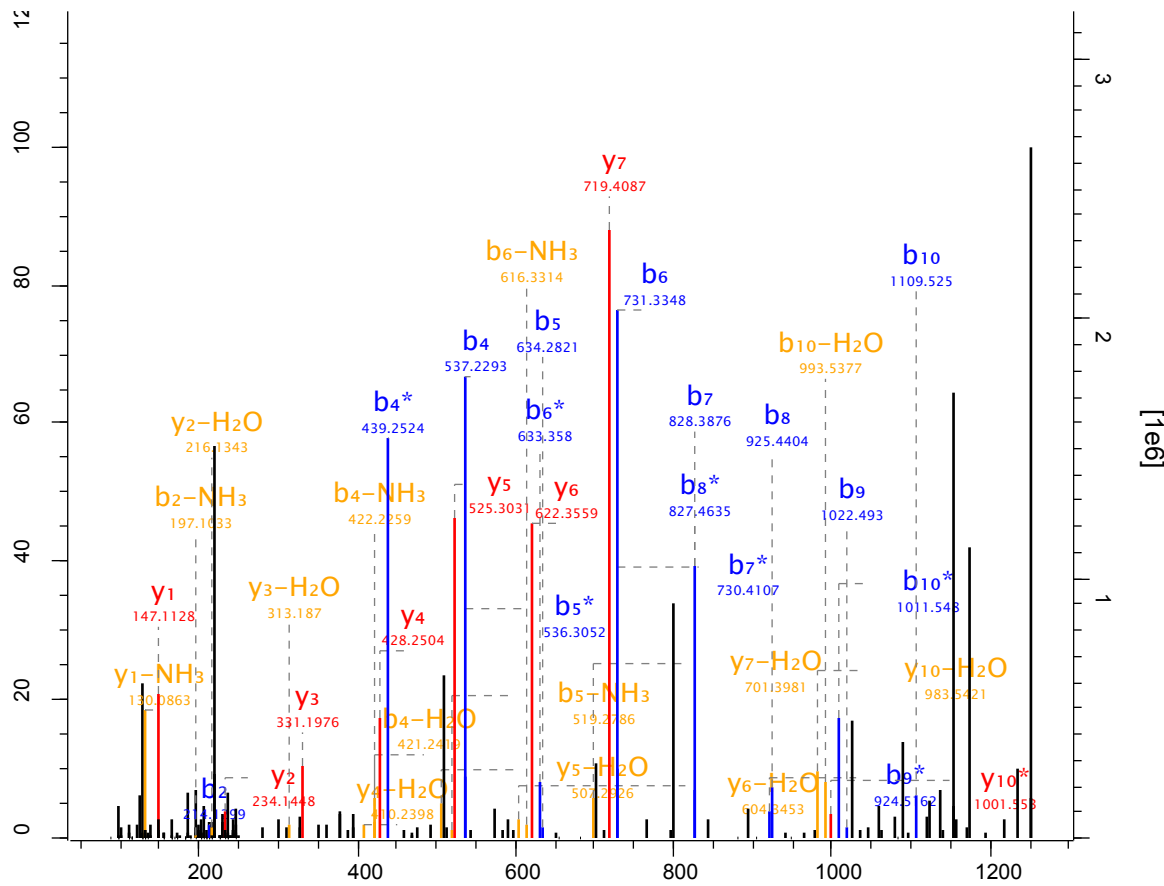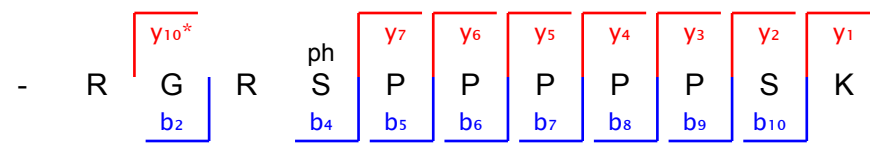

2013\_COL15\_34\_38\_151128201608

1082

FTMS; HCD

129.2

495.7

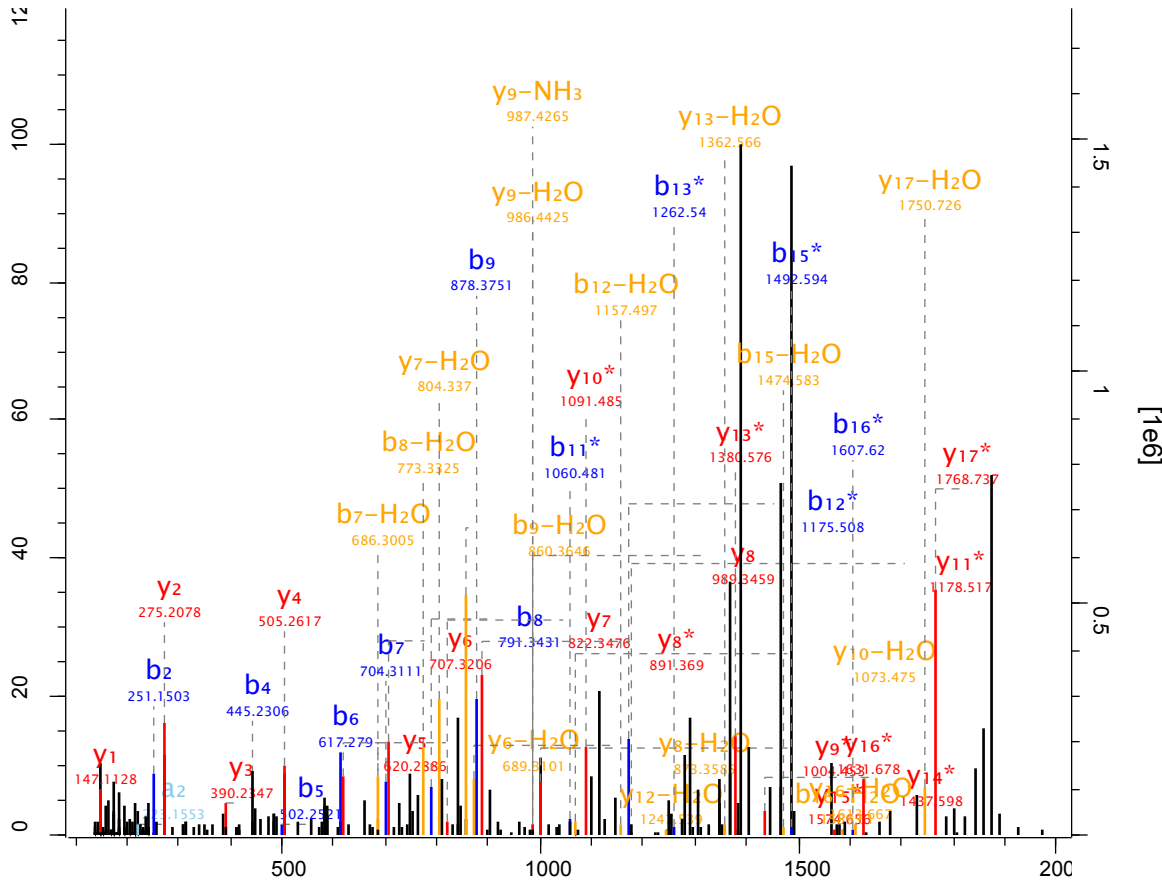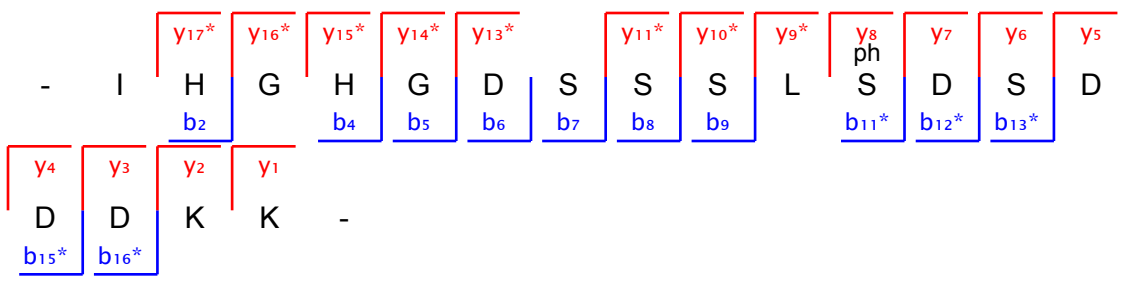

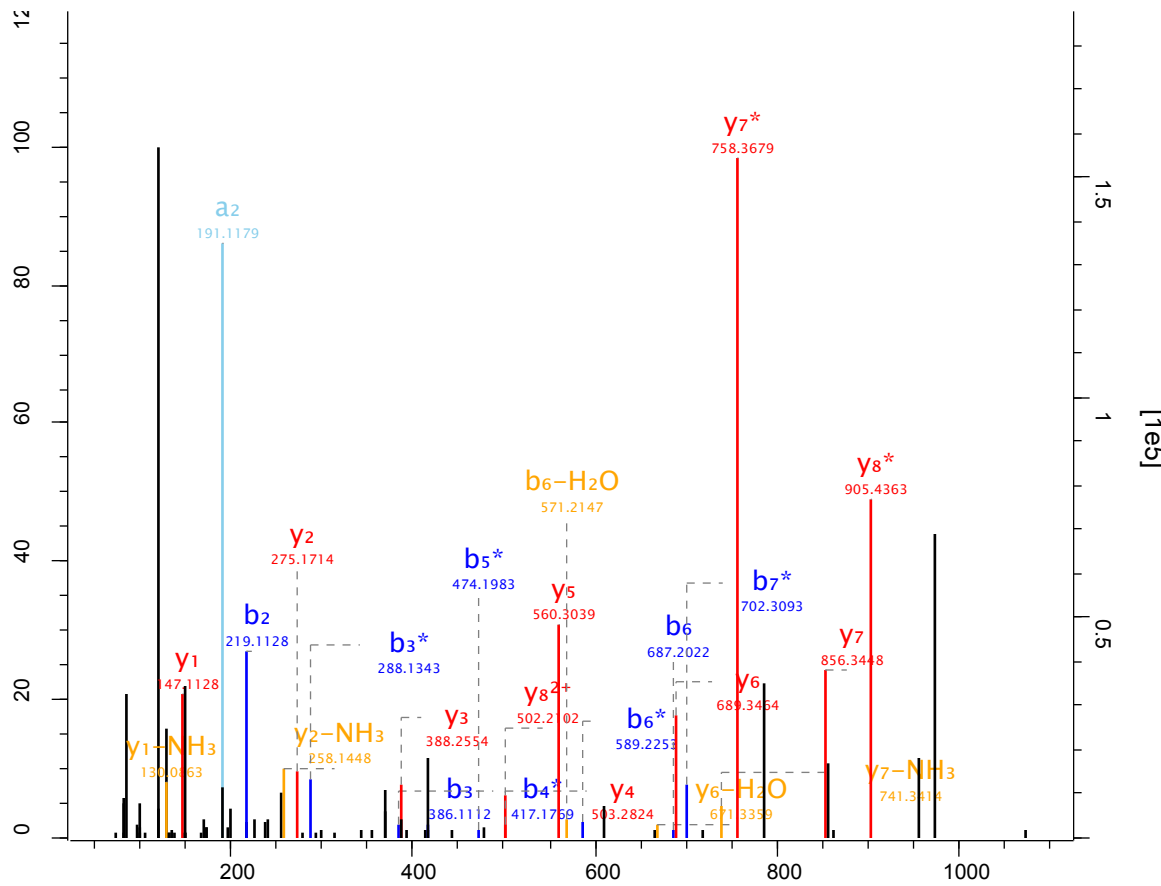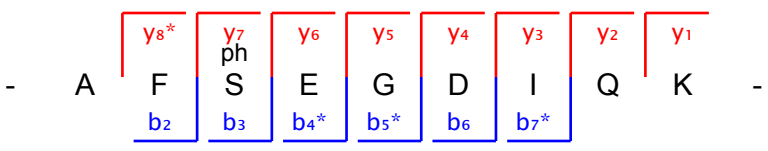

2013\_COL15\_34\_38\_151128201608

10937

FTMS; HCD

62.29

712.28

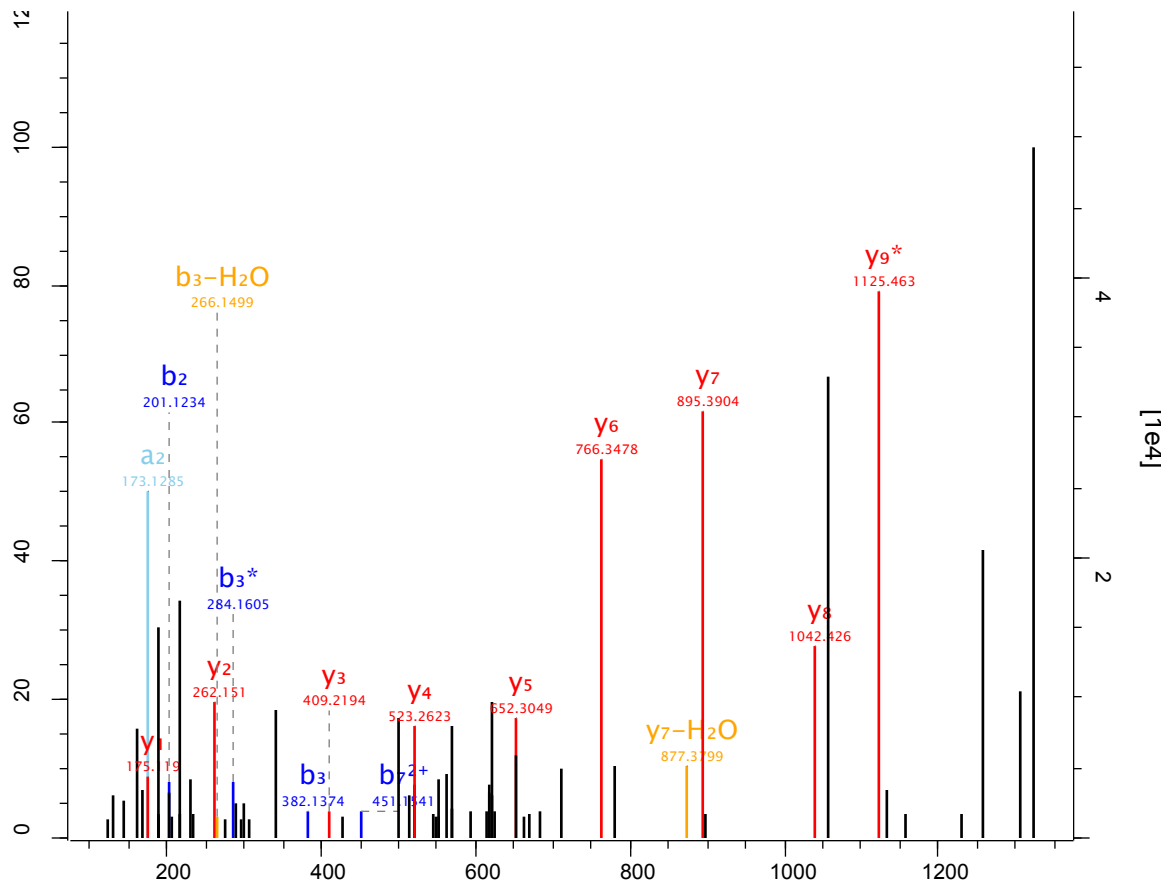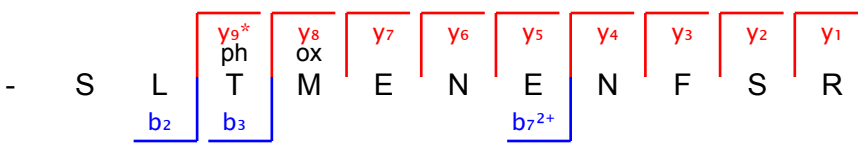





2013\_COL15\_34\_38\_151128201608

10960

FTMS; HCD

61.26

700.29

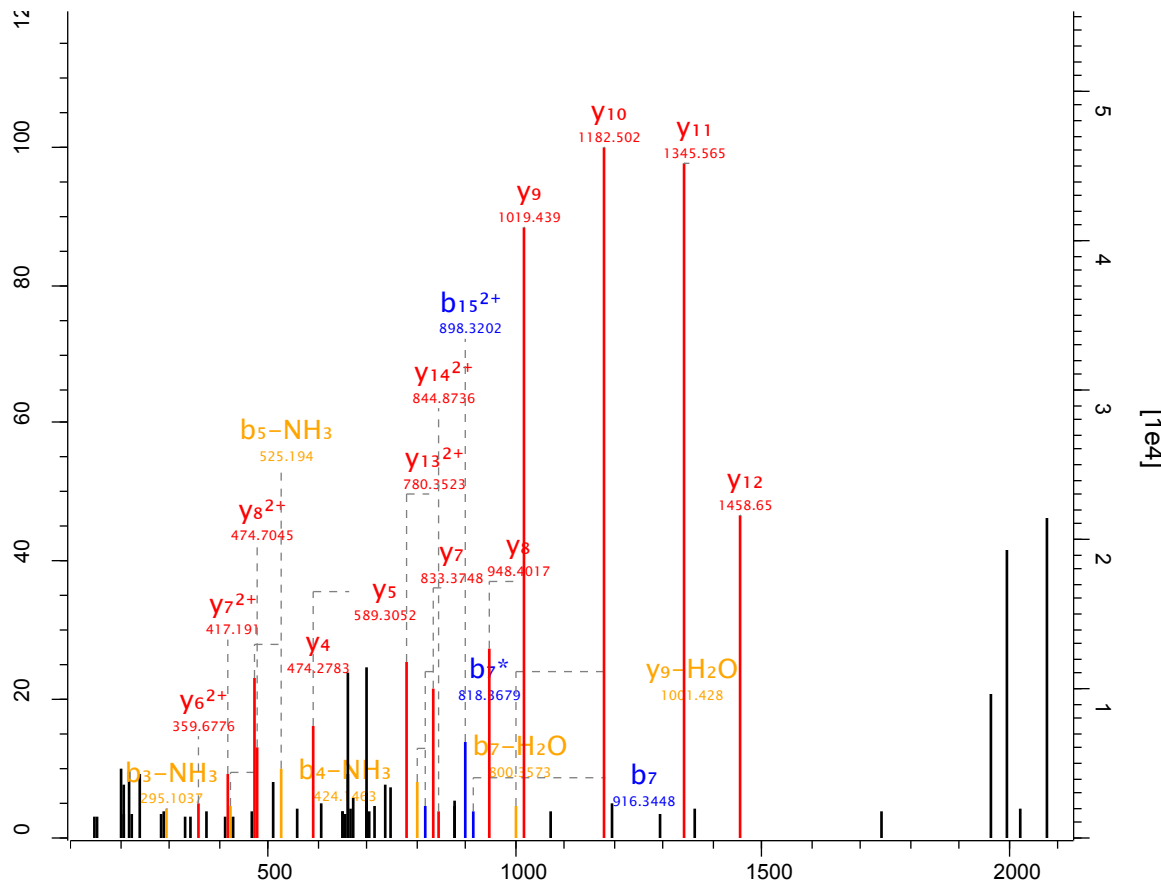

- Q N S E T L Y Y A D D E D G

y<sub>14</sub><sup>2+</sup>
y<sub>13</sub><sup>2+</sup>
y<sub>12</sub>
y<sub>11</sub>
y<sub>10</sub>
y<sub>9</sub>
y<sub>8</sub>
y<sub>7</sub>
y<sub>6</sub><sup>2+</sup>
y<sub>5</sub>
y<sub>4</sub>

b<sub>7</sub>

N R K -

b<sub>15</sub><sup>2+</sup>

2013\_COL15\_34\_38\_151128201608

1097

FTMS; HCD

132.51

530.57

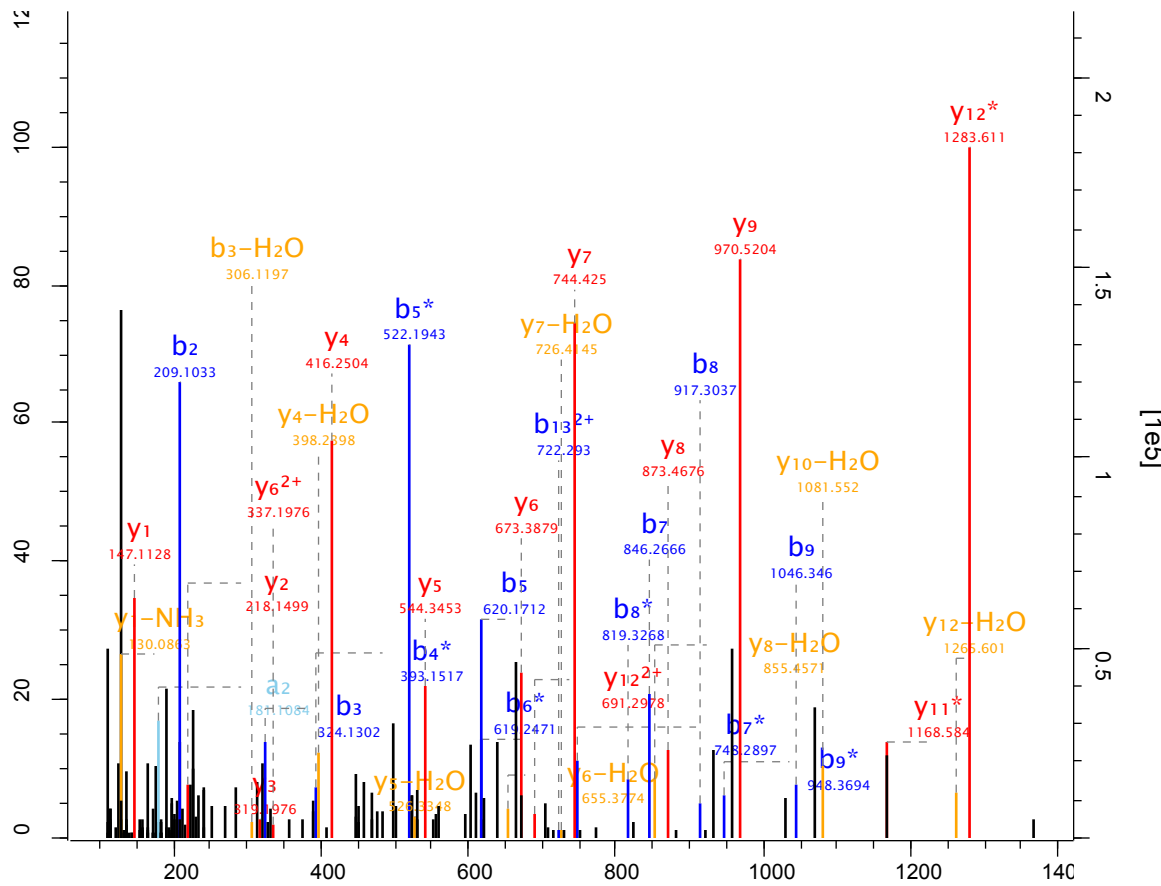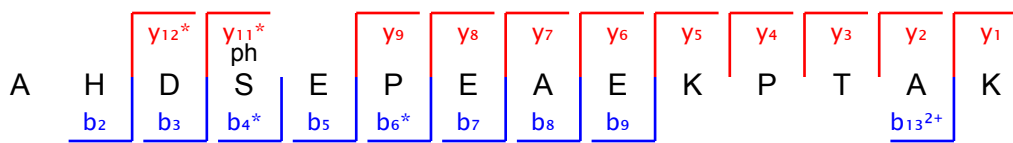

2013\_COL15\_34\_38\_151128201608

10979

FTMS; HCD

144.1

553.77

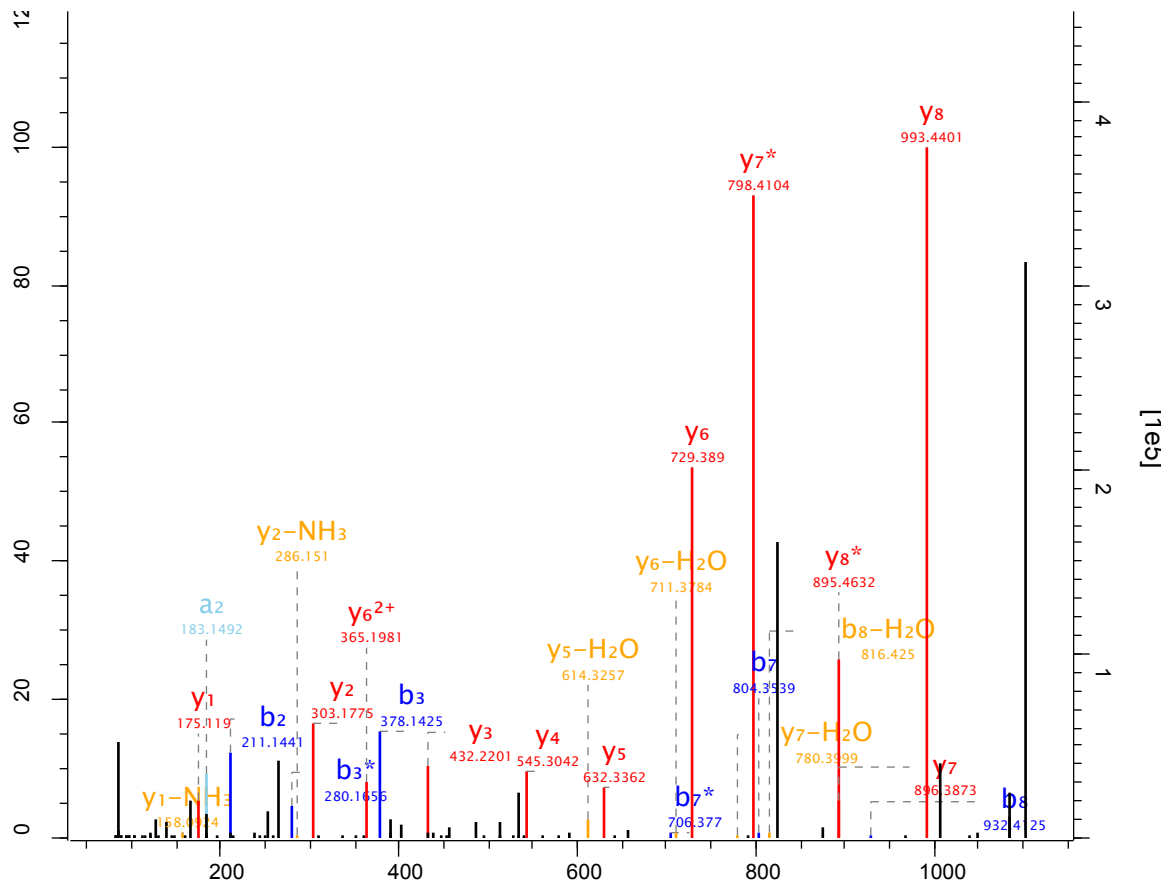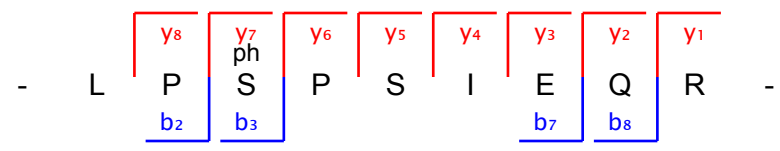

2013\_COL15\_34\_38\_151128201608

11053

FTMS; HCD

121.82

641.95

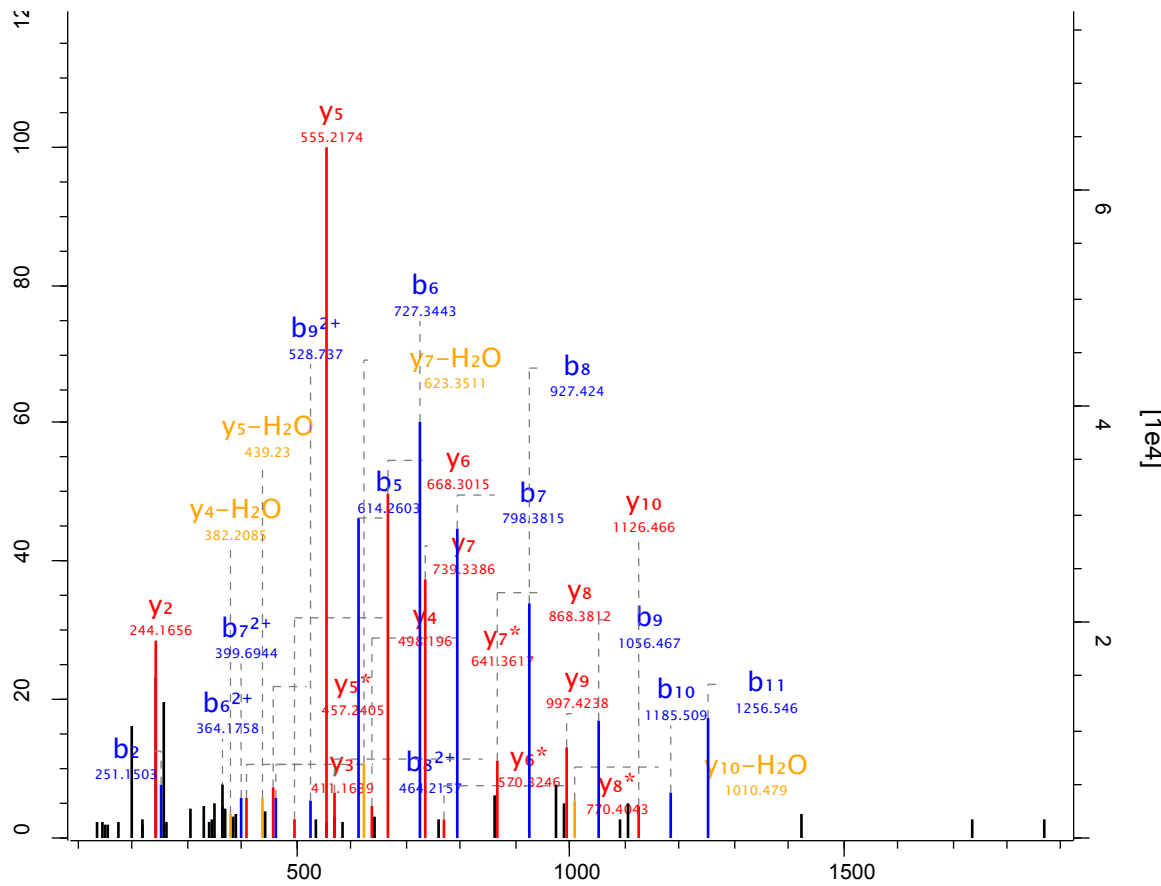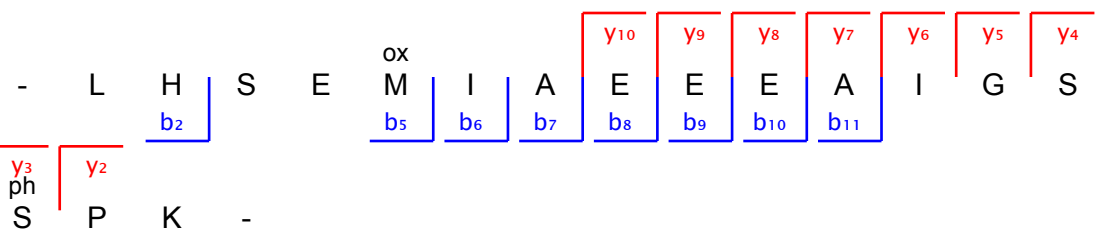

| Raw file                      | Scan  | Method    | Score | m/z   |
|-------------------------------|-------|-----------|-------|-------|
| 2013_COL15_34_38_151128201608 | 11065 | FTMS; HCD | 54.9  | 655.8 |

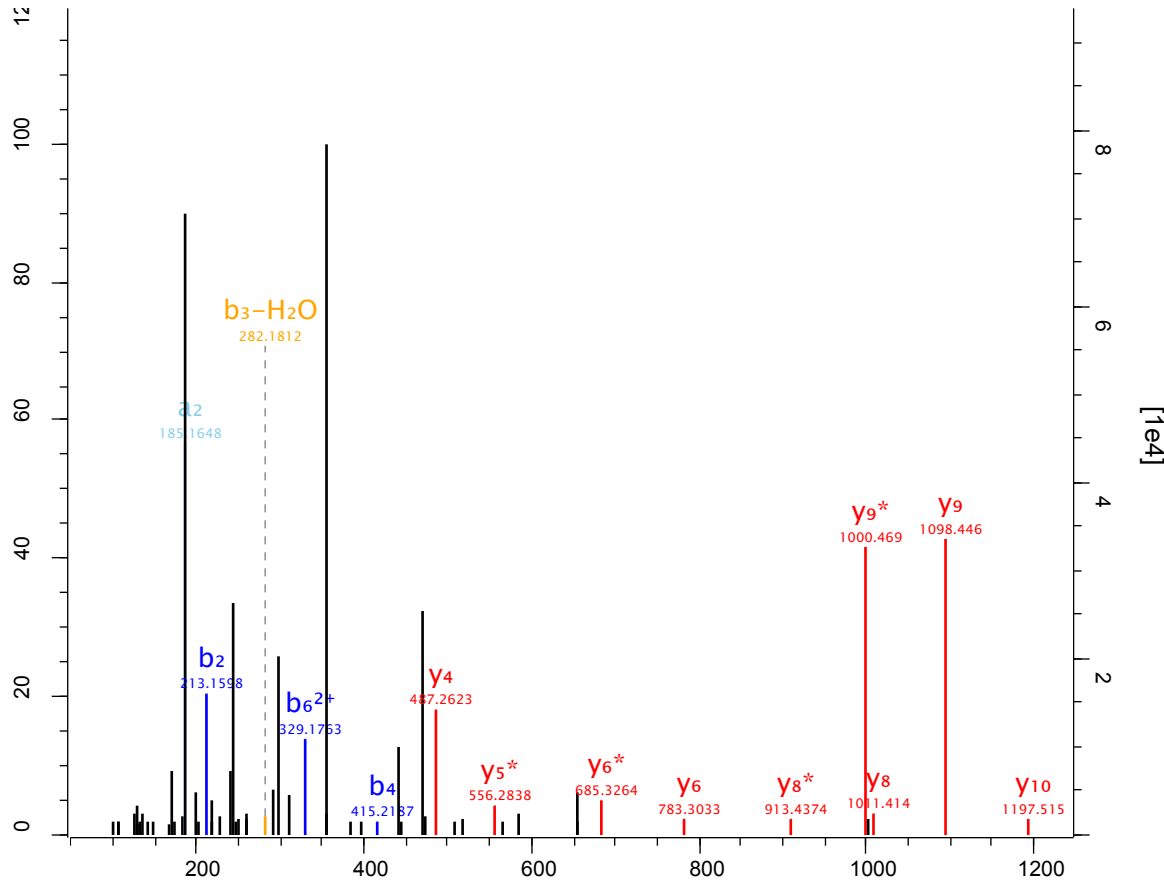

- I V S D L E S P T N R -

Annotations below the sequence:

- y<sub>10</sub>** (red box) above V
- y<sub>9</sub>** (red box) above S
- y<sub>8</sub>** (red box) above D
- y<sub>6</sub>** (red box) above E
- y<sub>5</sub><sup>\*</sup>** (red box) above S
- y<sub>4</sub>** (red box) above P
- b<sub>2</sub>** (blue box) below V
- b<sub>4</sub>** (blue box) below D
- b<sub>6</sub><sup>2+</sup>** (blue box) below E

2013\_COL15\_34\_38\_151128201608

11080

FTMS; HCD

77.73

654.06

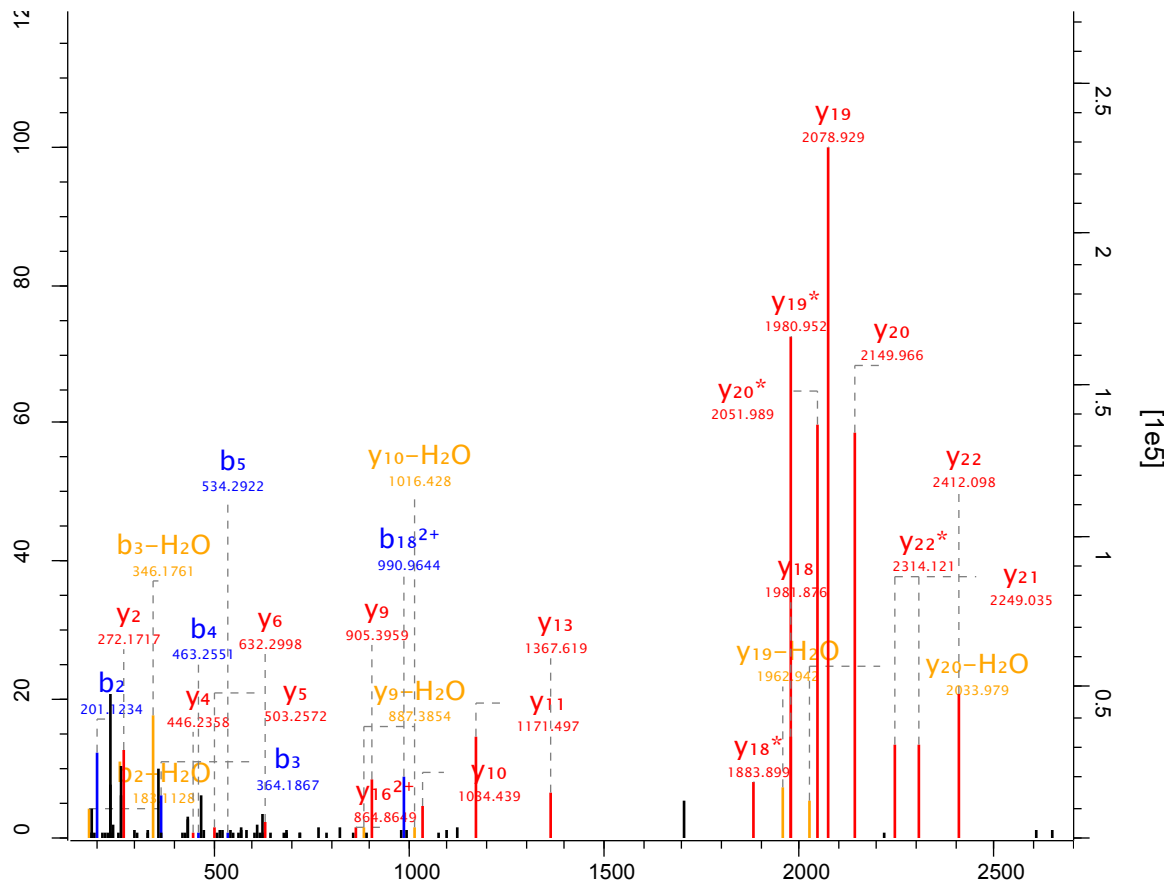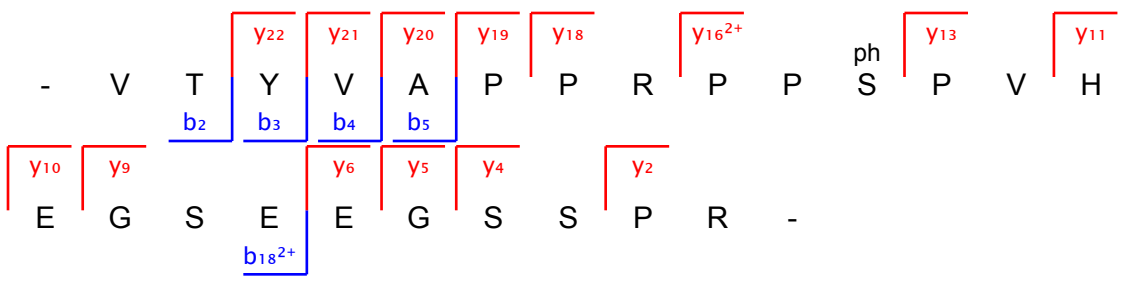

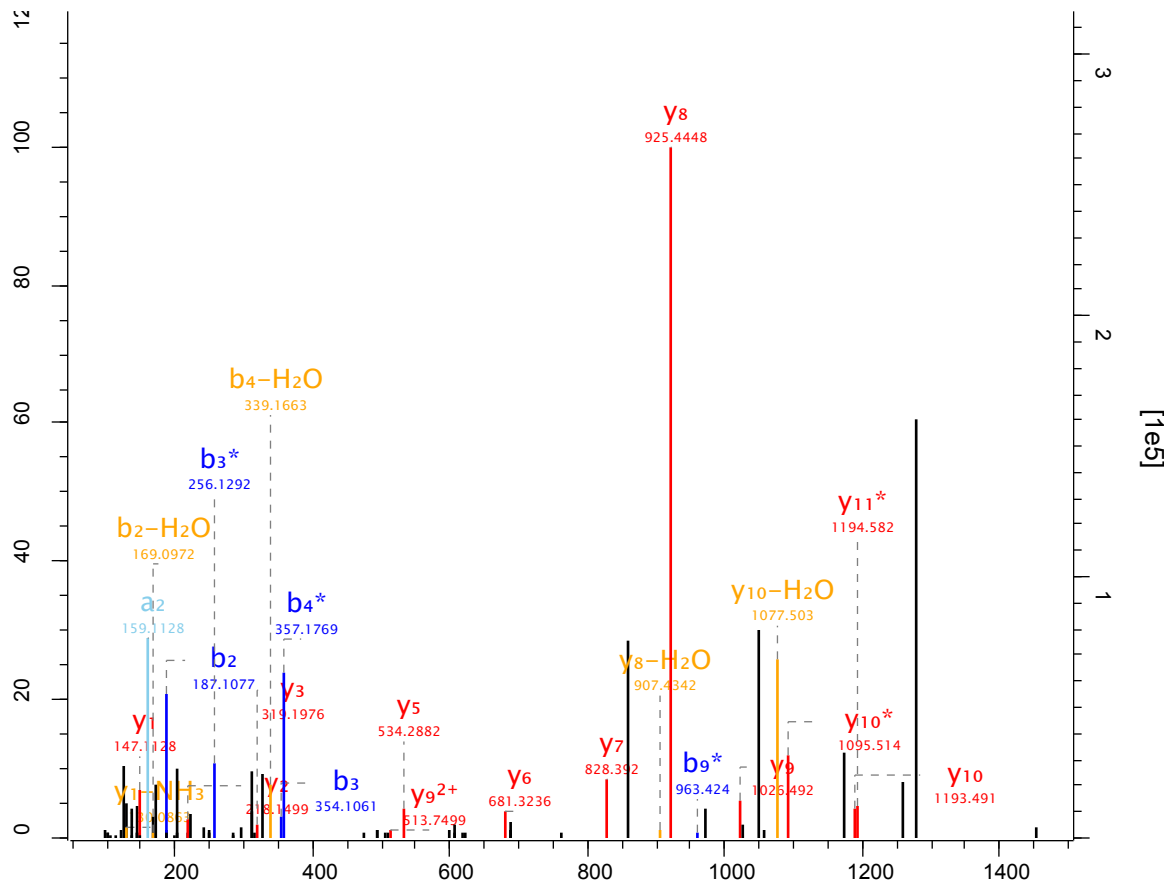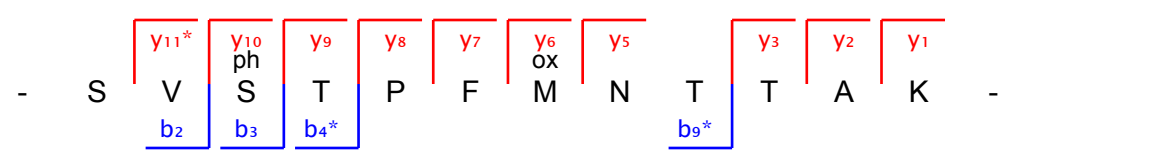



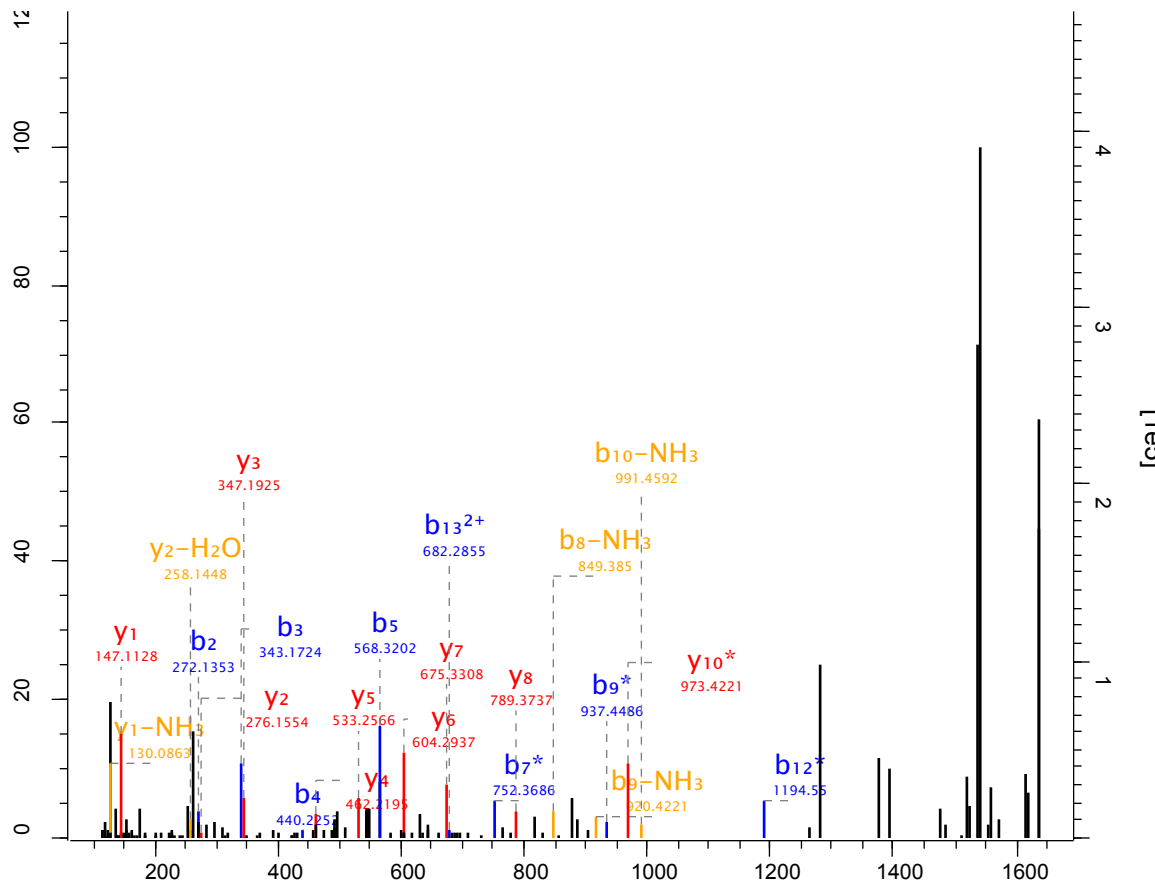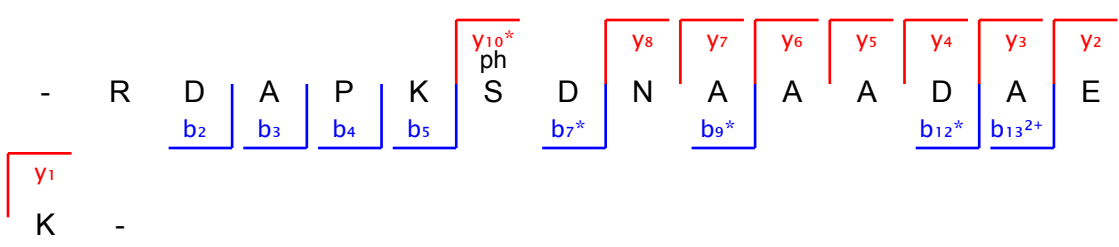

2013\_COL15\_34\_38\_151128201608

11189

FTMS; HCD

112.24

657.78

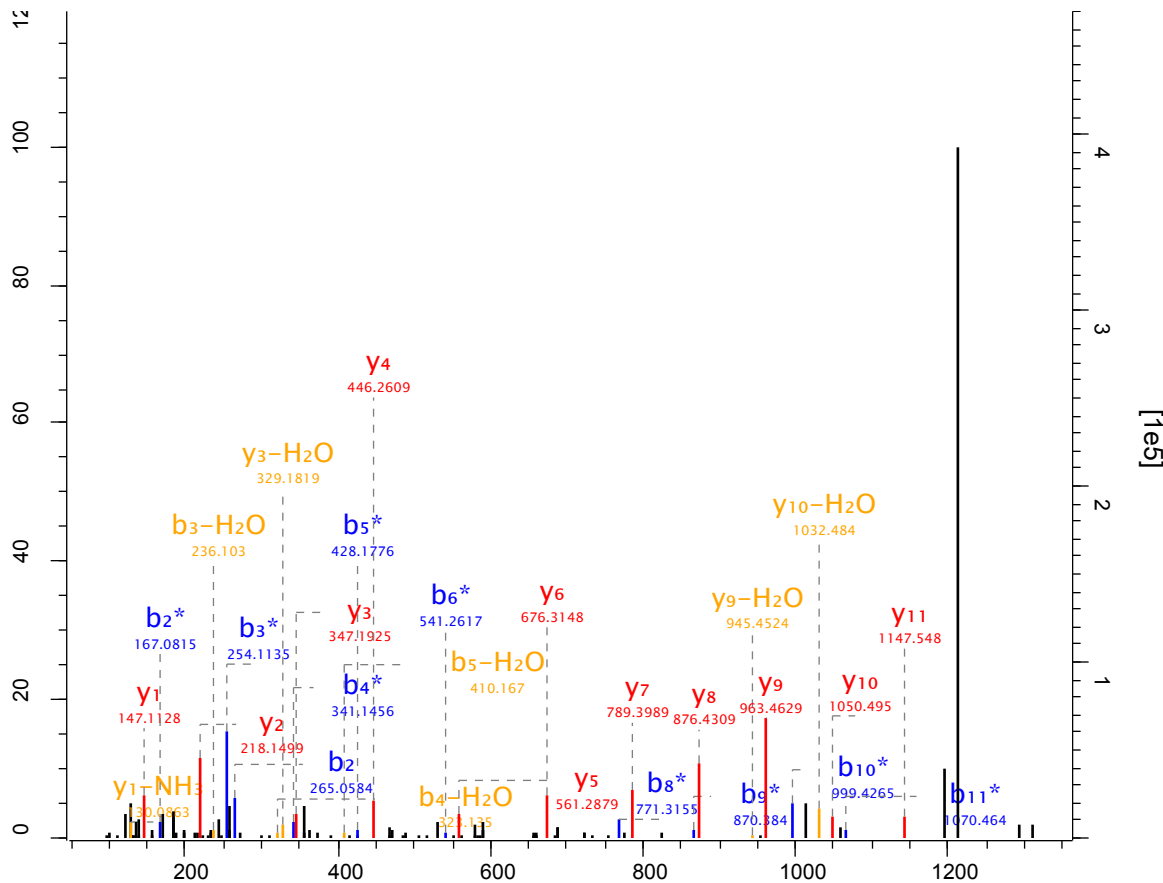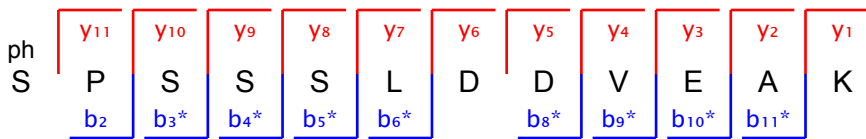

| Raw file                      | Scan  | Method    | Score | m/z    |
|-------------------------------|-------|-----------|-------|--------|
| 2013_COL15_34_38_151128201608 | 11213 | FTMS; HCD | 41.68 | 555.01 |

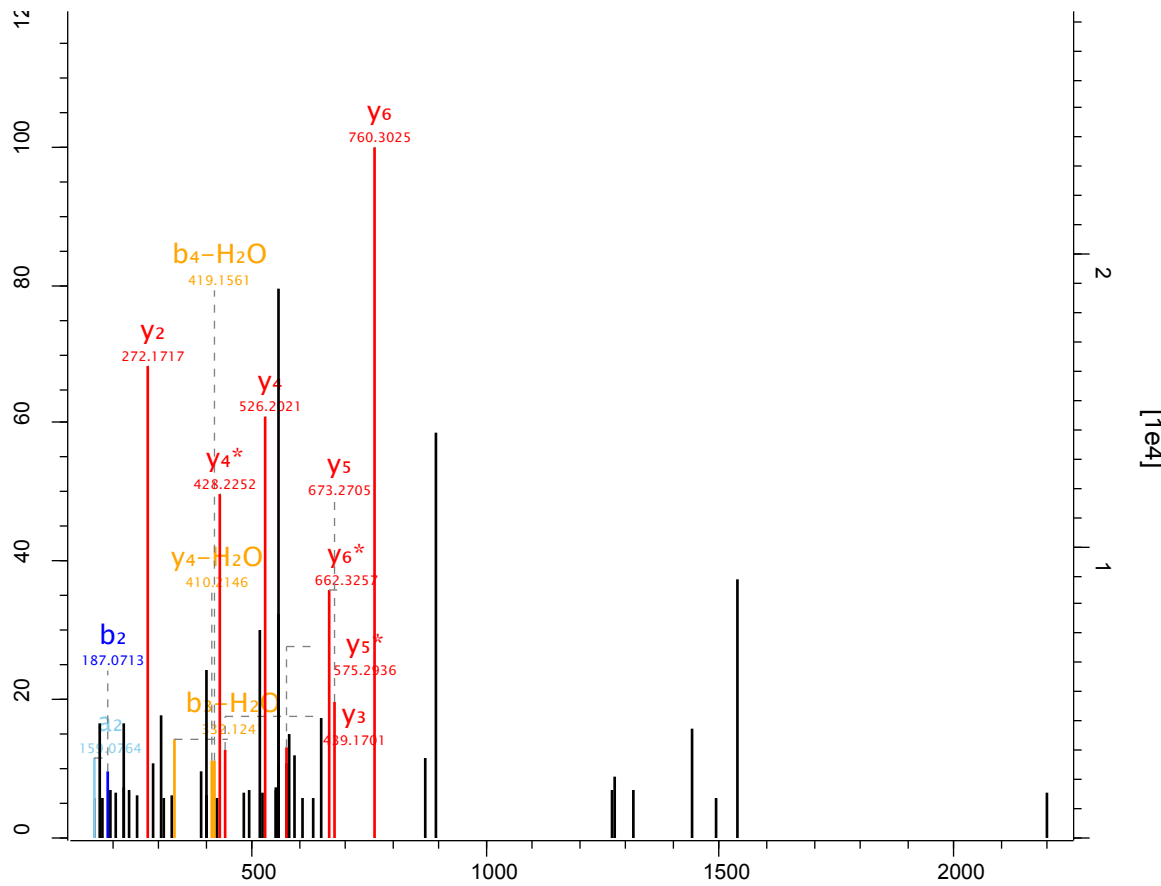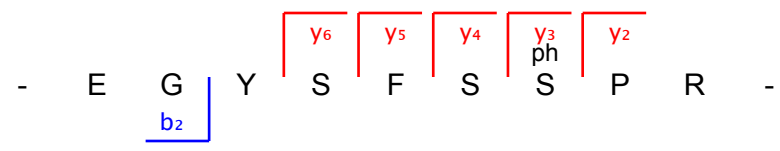

2013\_COL15\_34\_38\_151128201608

11264

FTMS; HCD

50.36

841.35

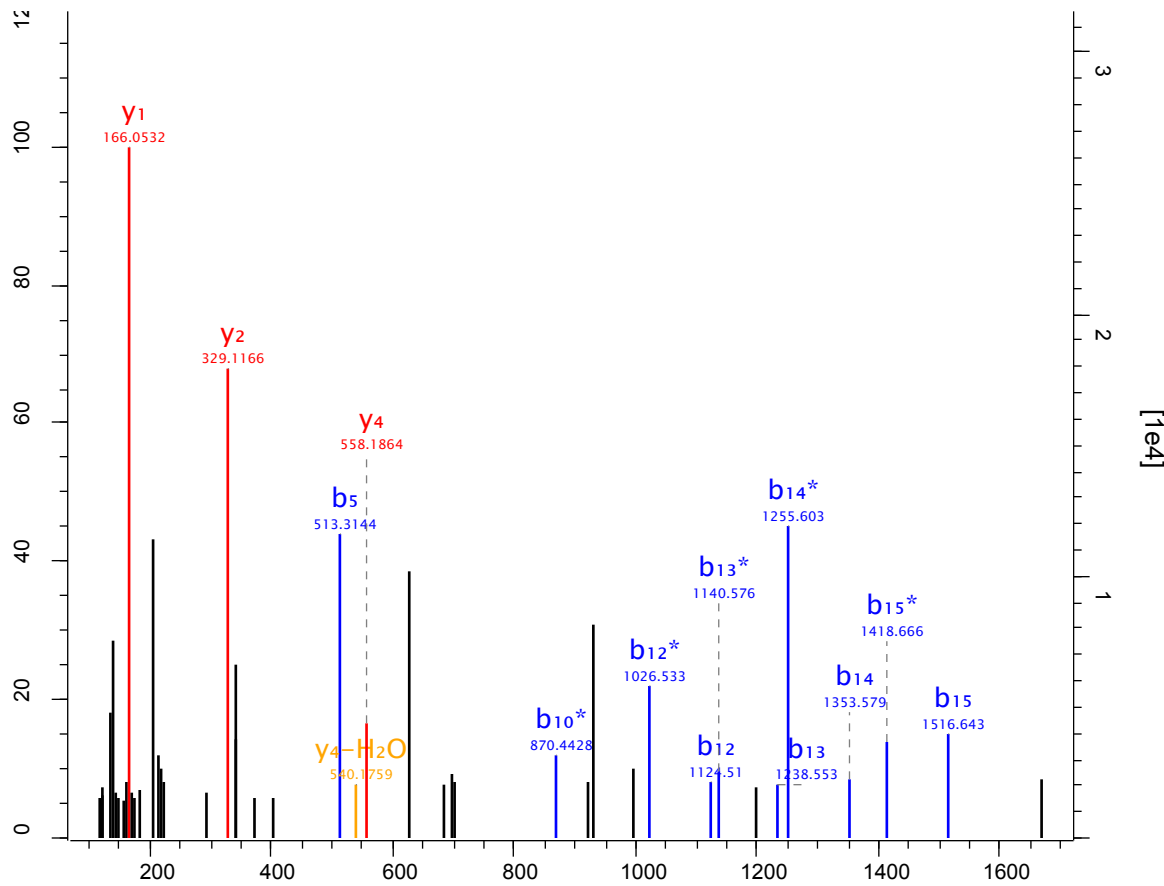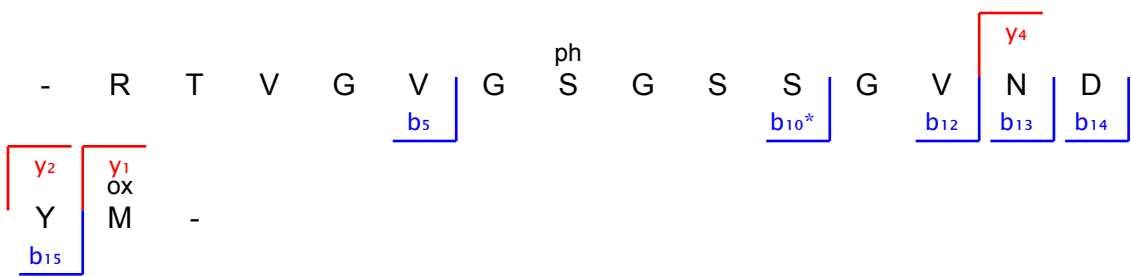

2013\_COL15\_34\_38\_151128201608

11267

FTMS; HCD

72.49

514.59

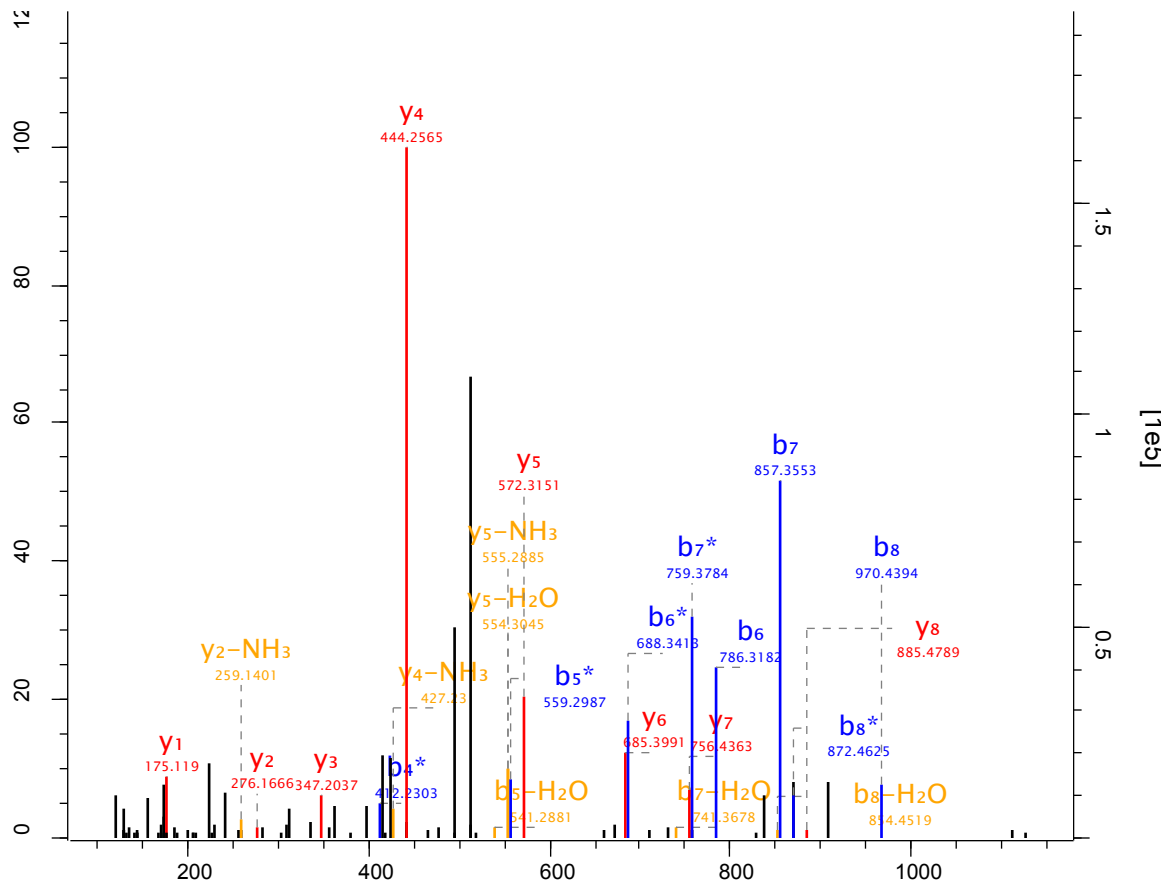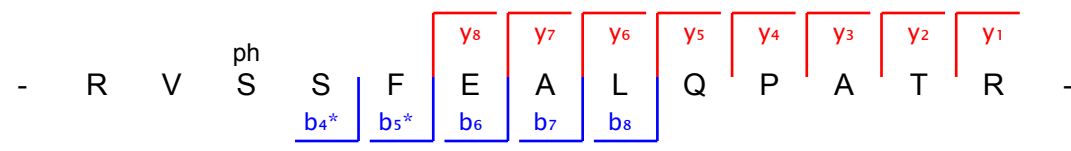

2013\_COL15\_34\_38\_151128201608

11308

FTMS; HCD

84.38

702.29

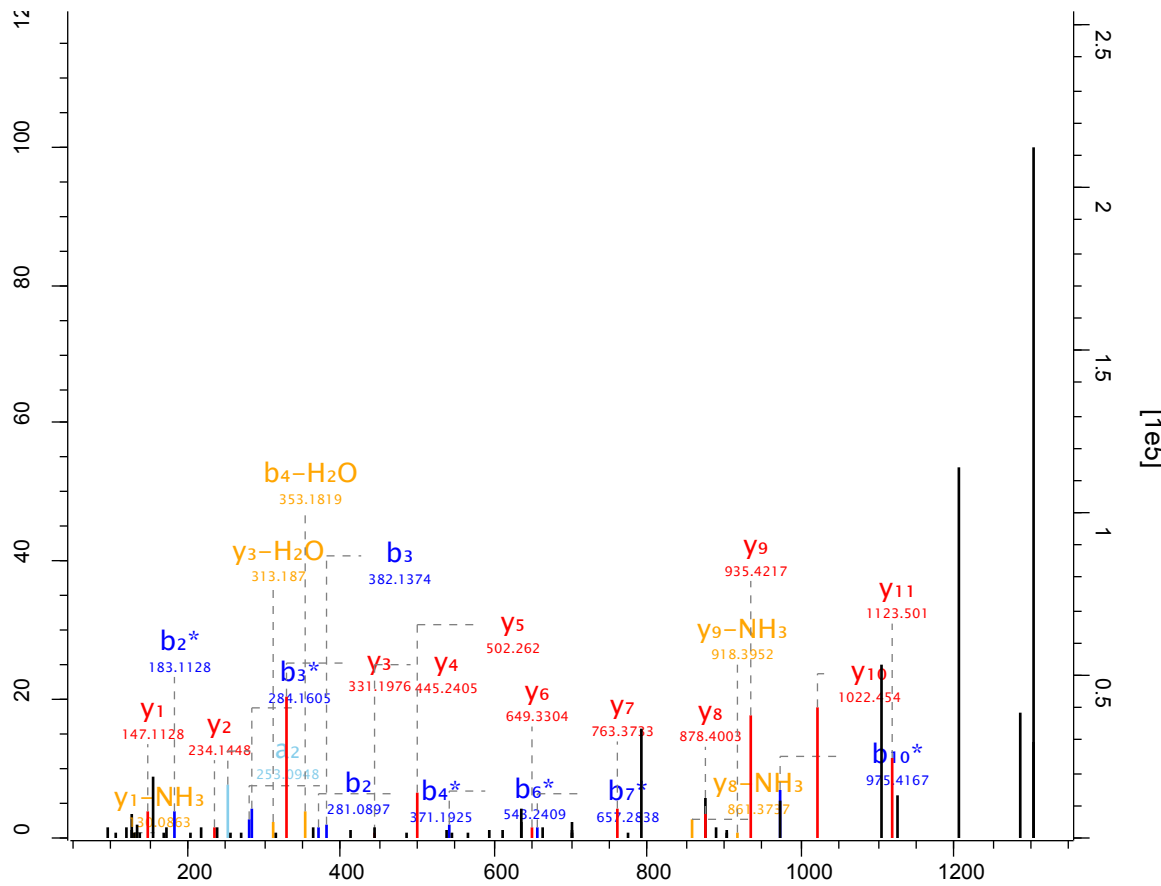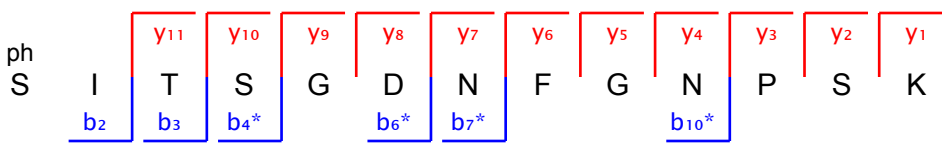

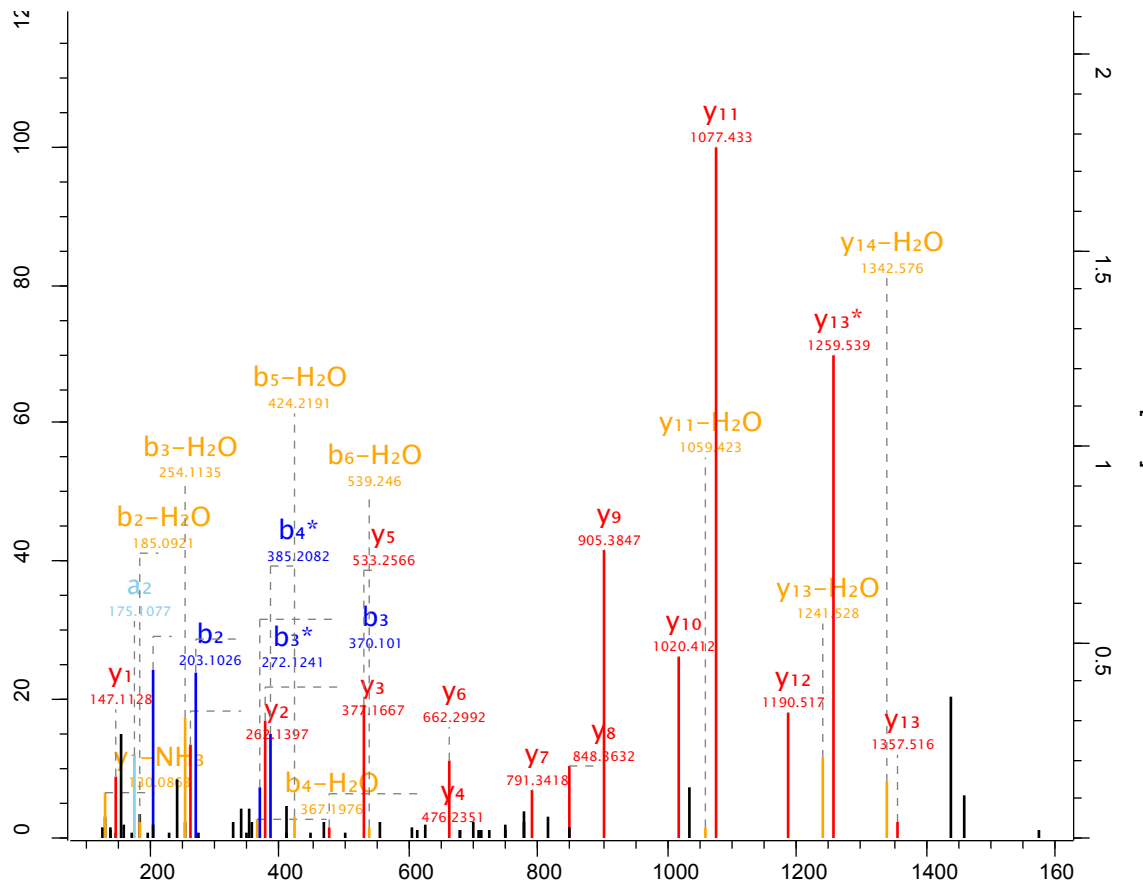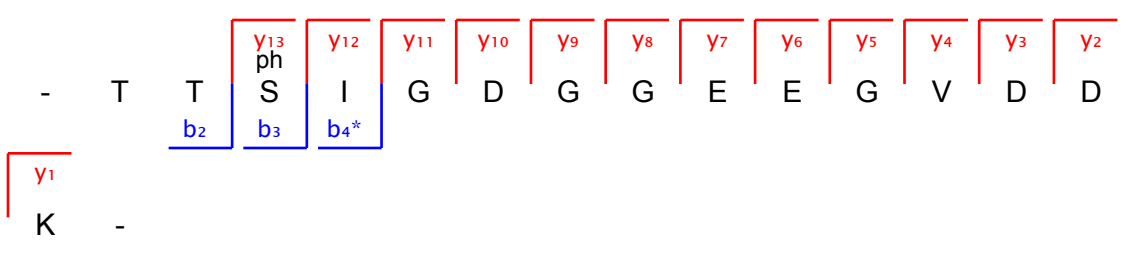

2013\_COL15\_34\_38\_151128201608

11425

FTMS; HCD

85.54

561.79

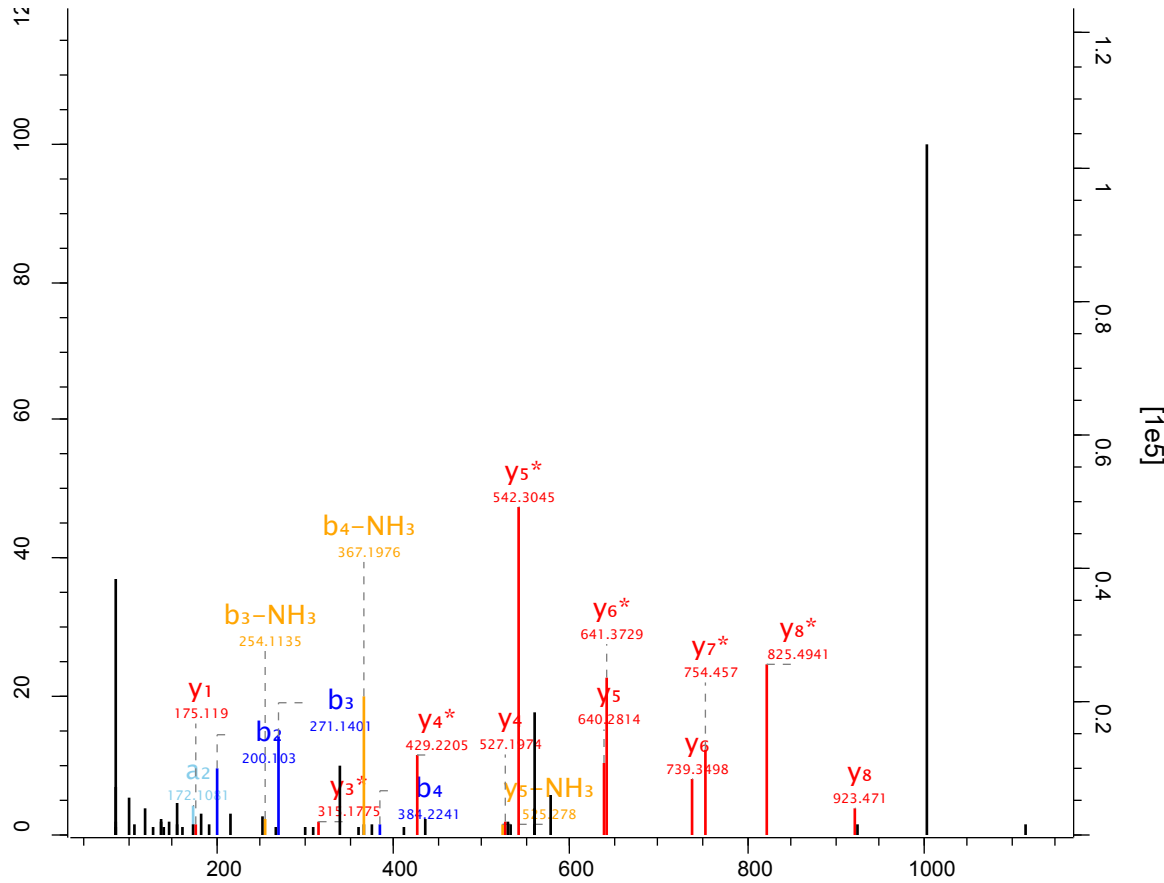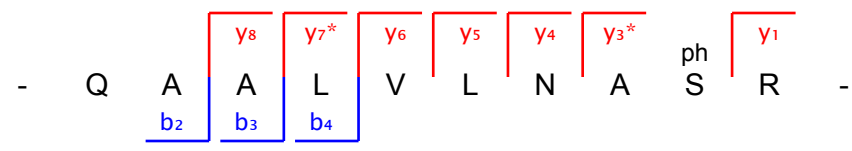



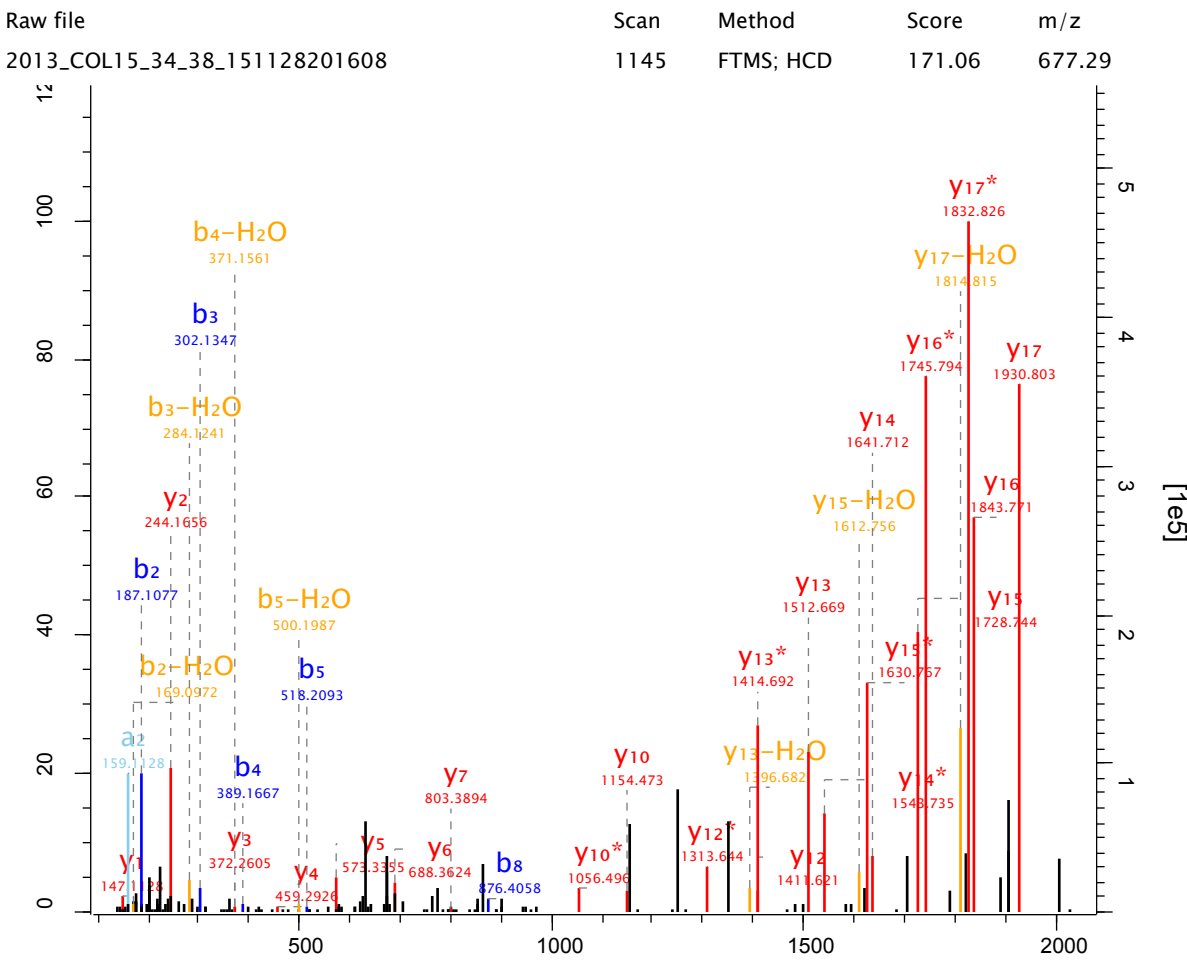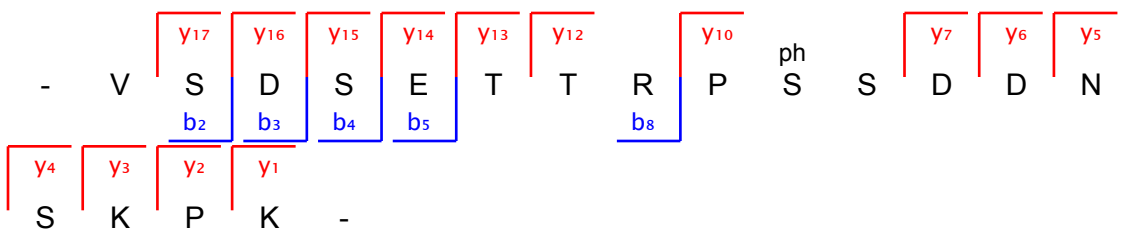

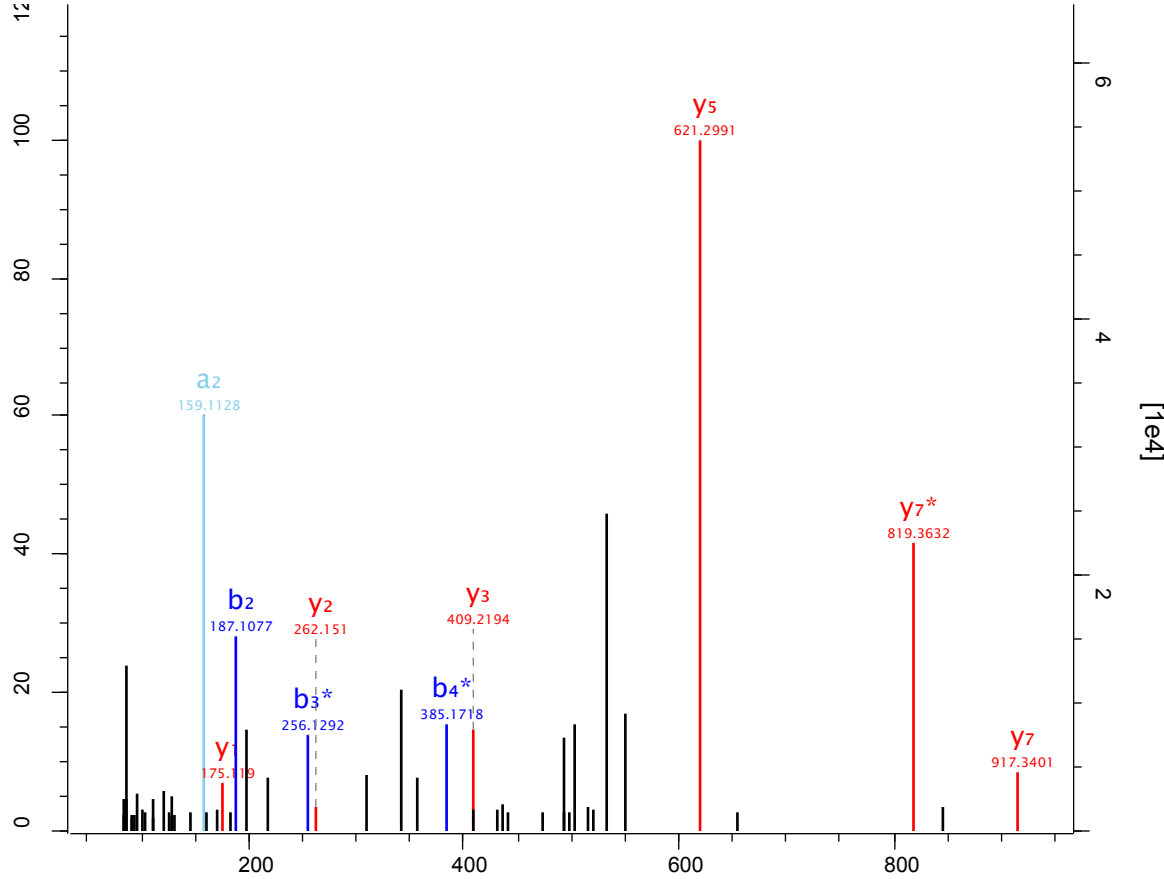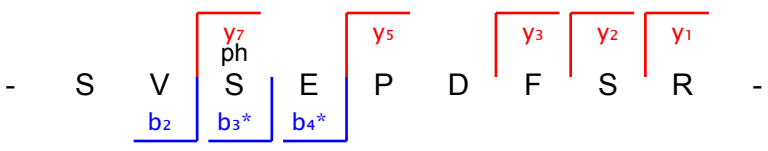

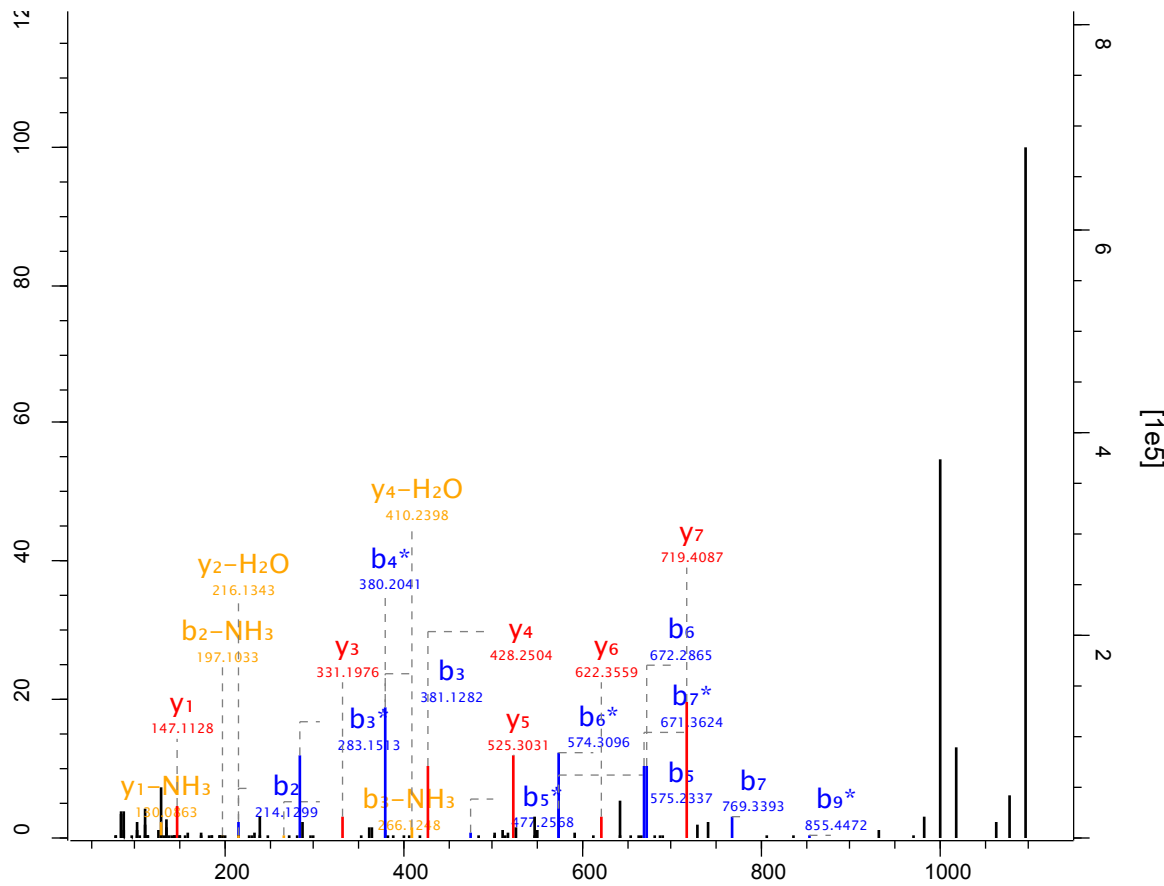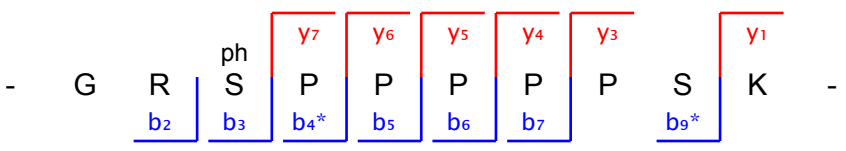

2013\_COL15\_34\_38\_151128201608

11601

FTMS; HCD

62.86

471.9

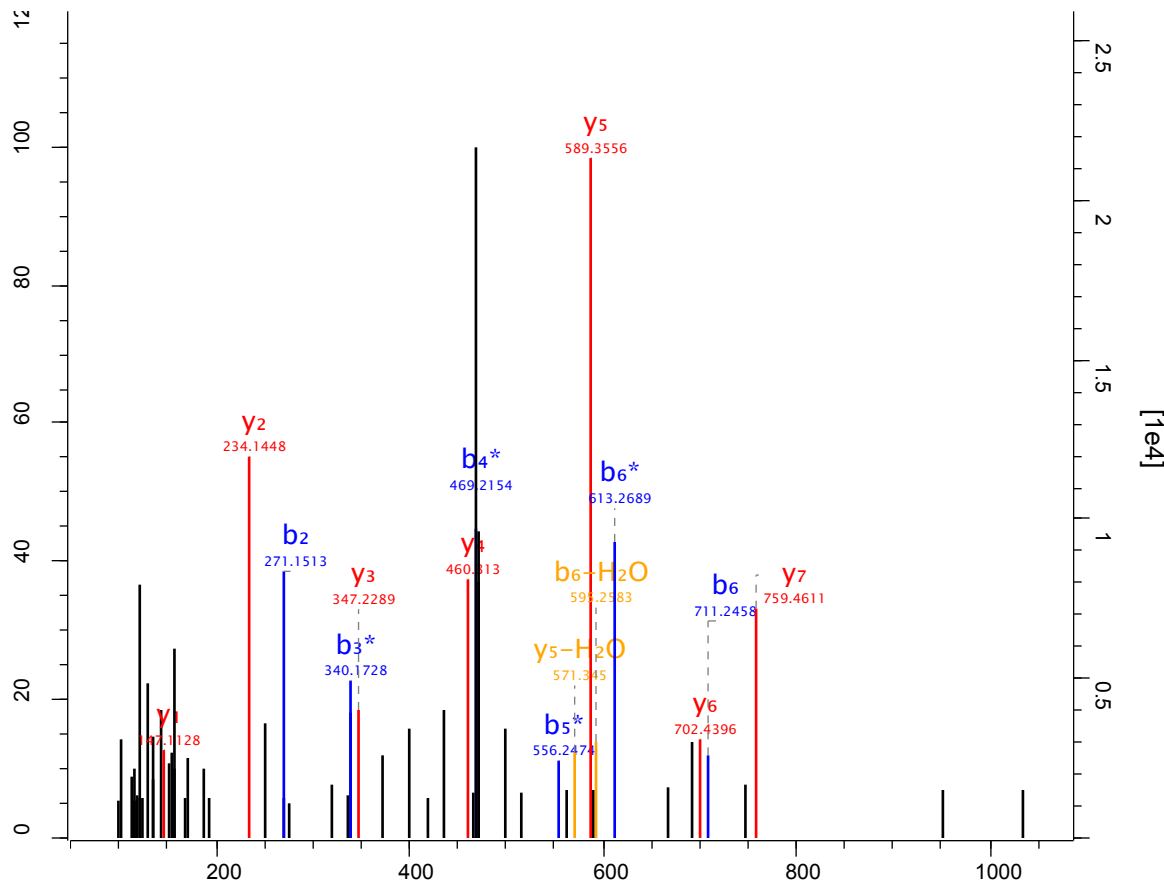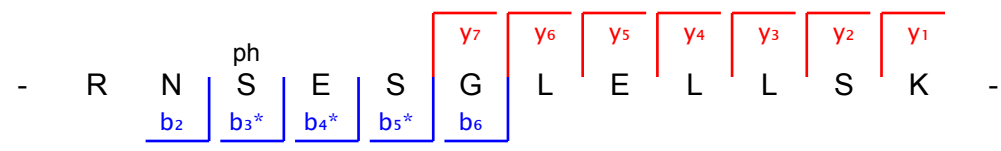

Raw file Scan Method Score m/z

2013\_COL15\_34\_38\_151128201608

1161

FTMS; HCD

110.6

652.62

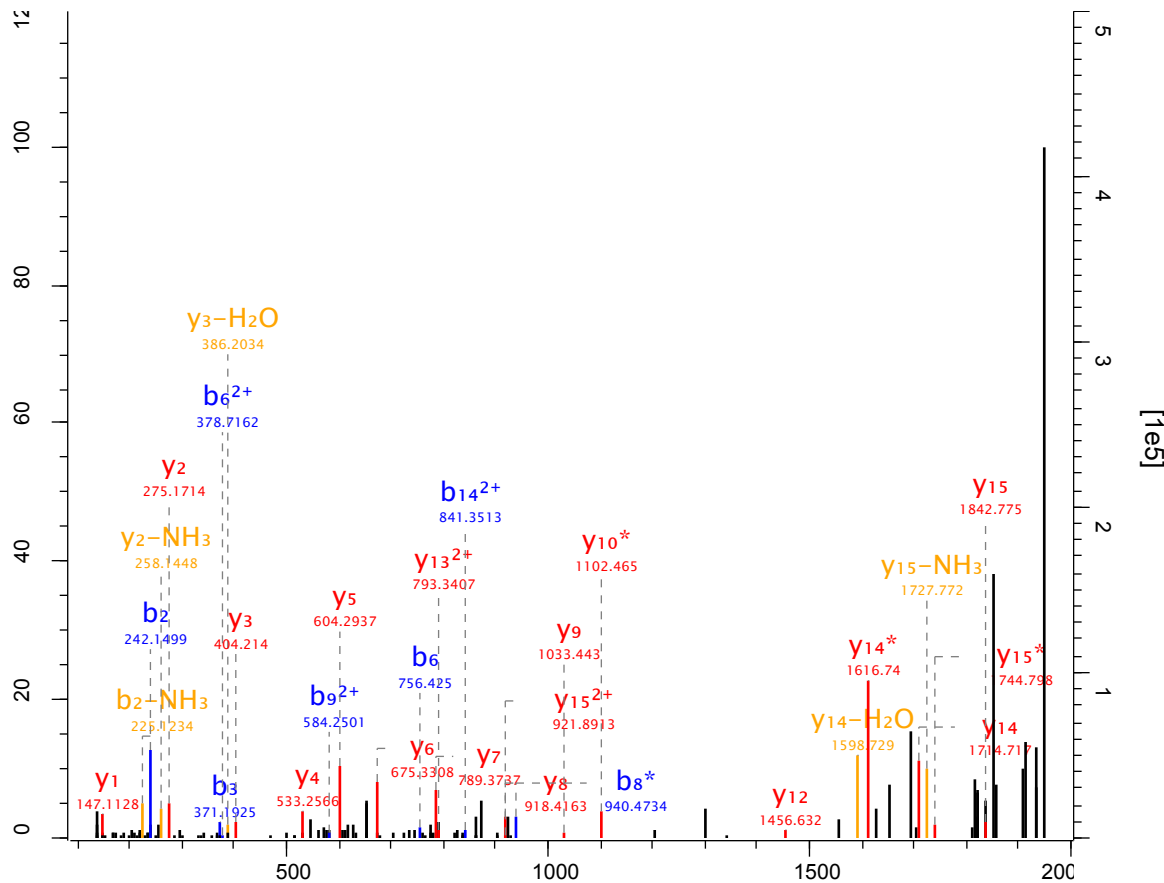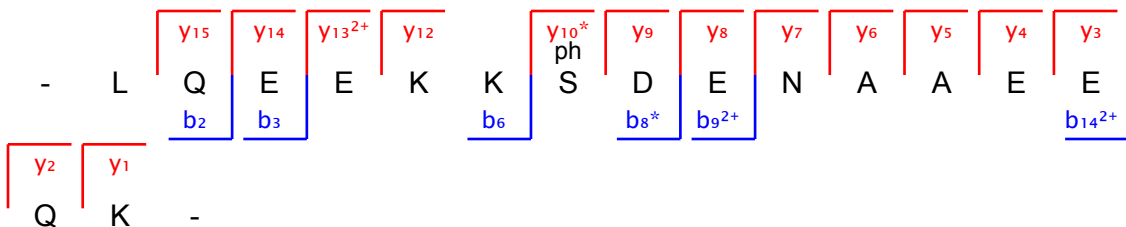

Q - L - Q - E - E - K - K - S - D - E - N - A - A - E - E

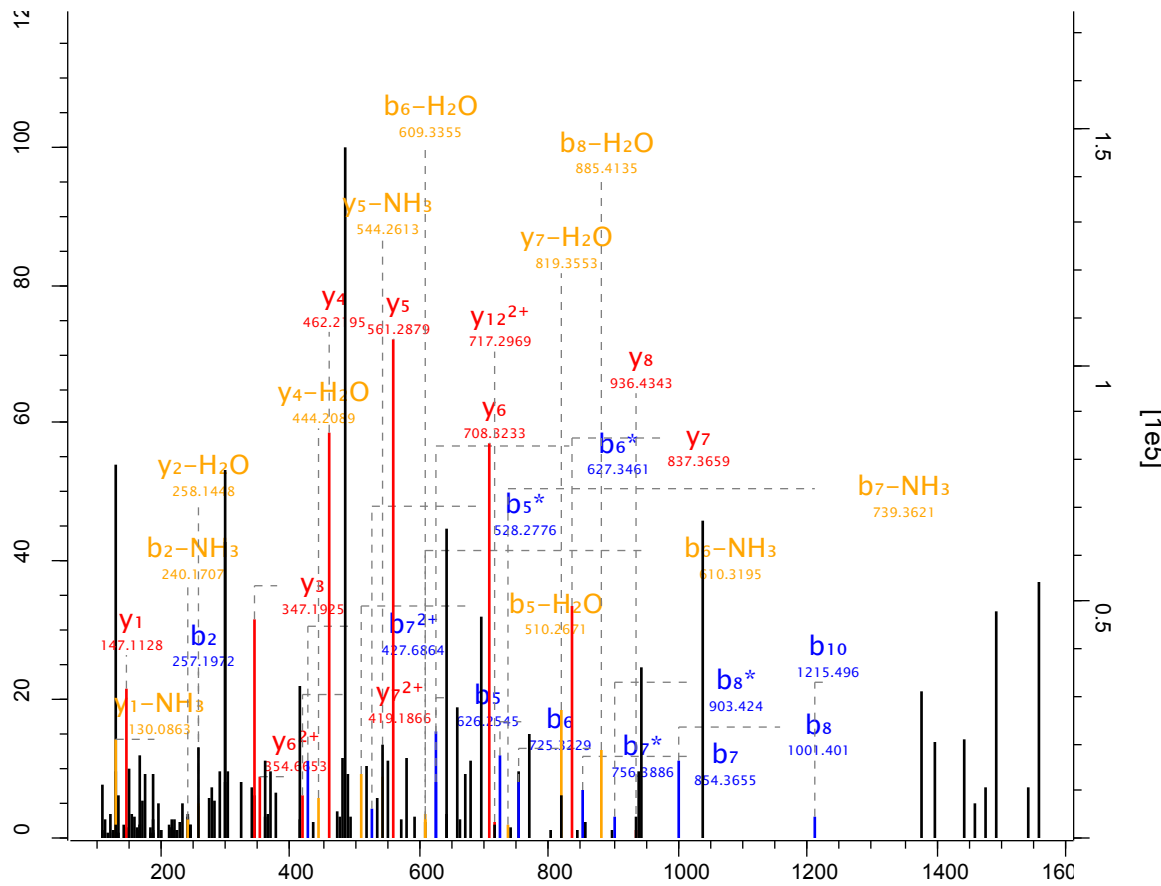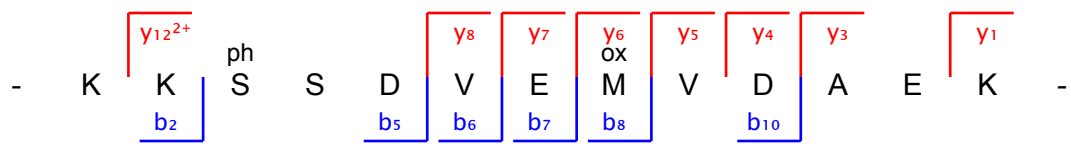

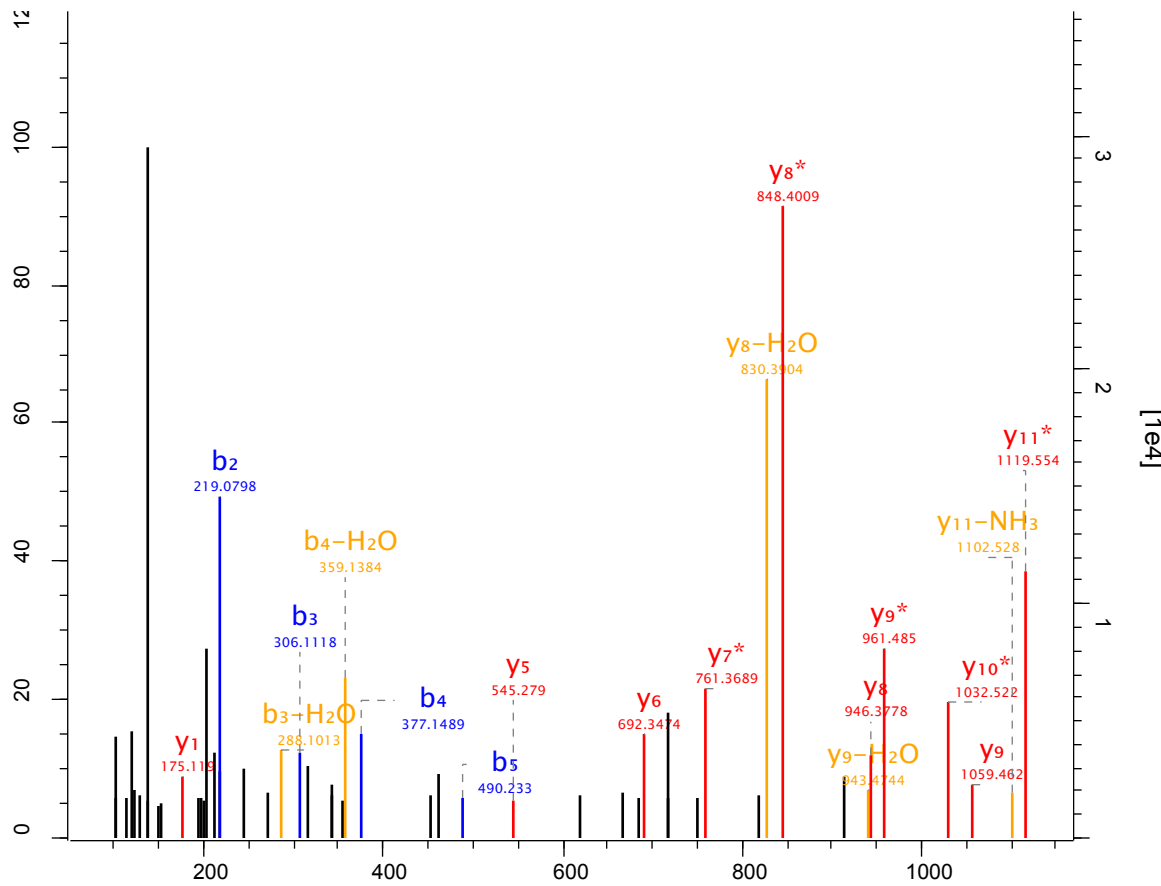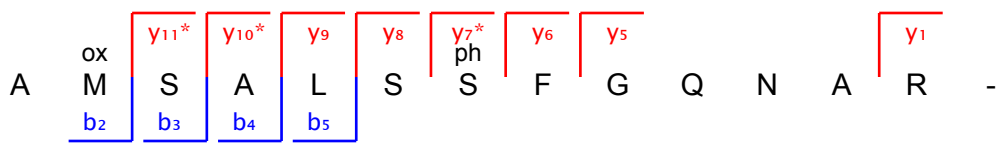

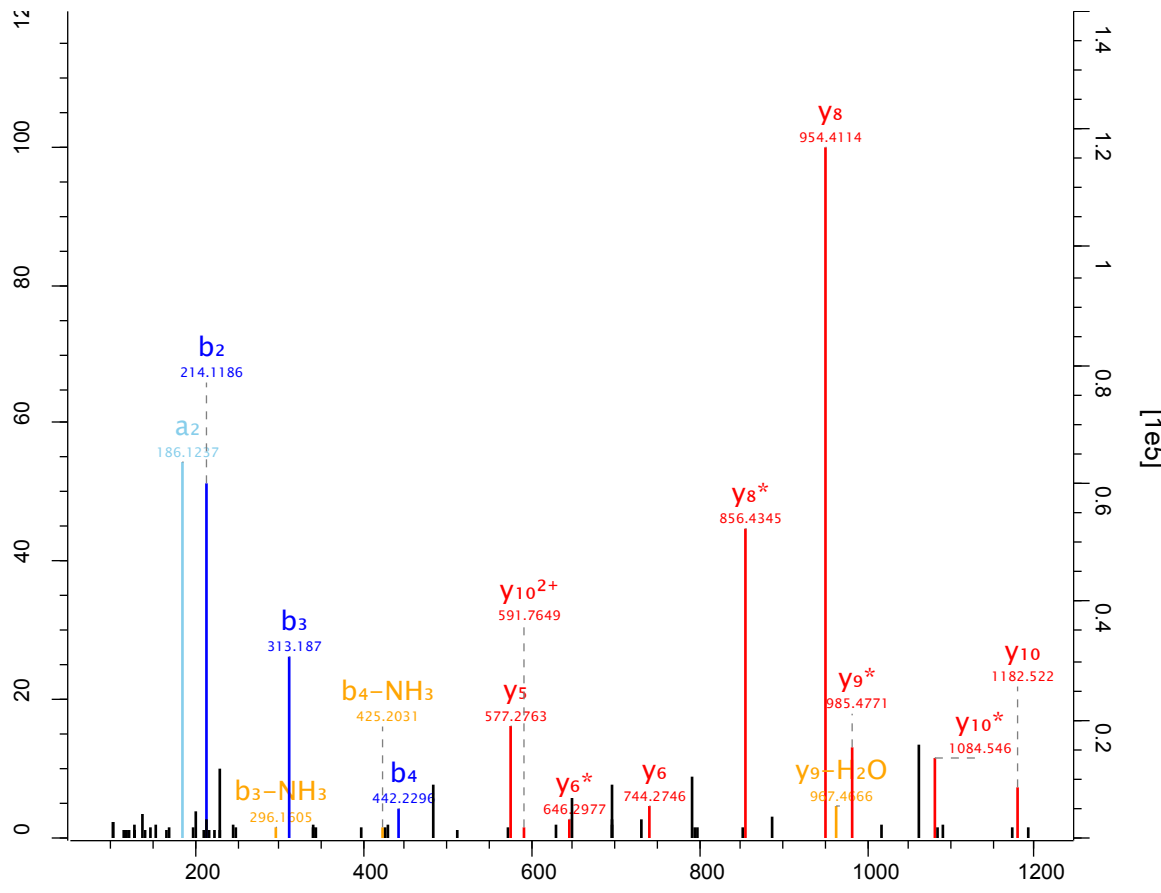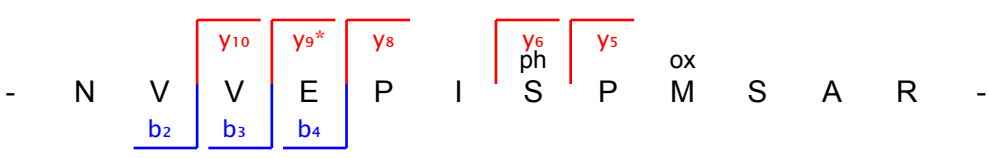



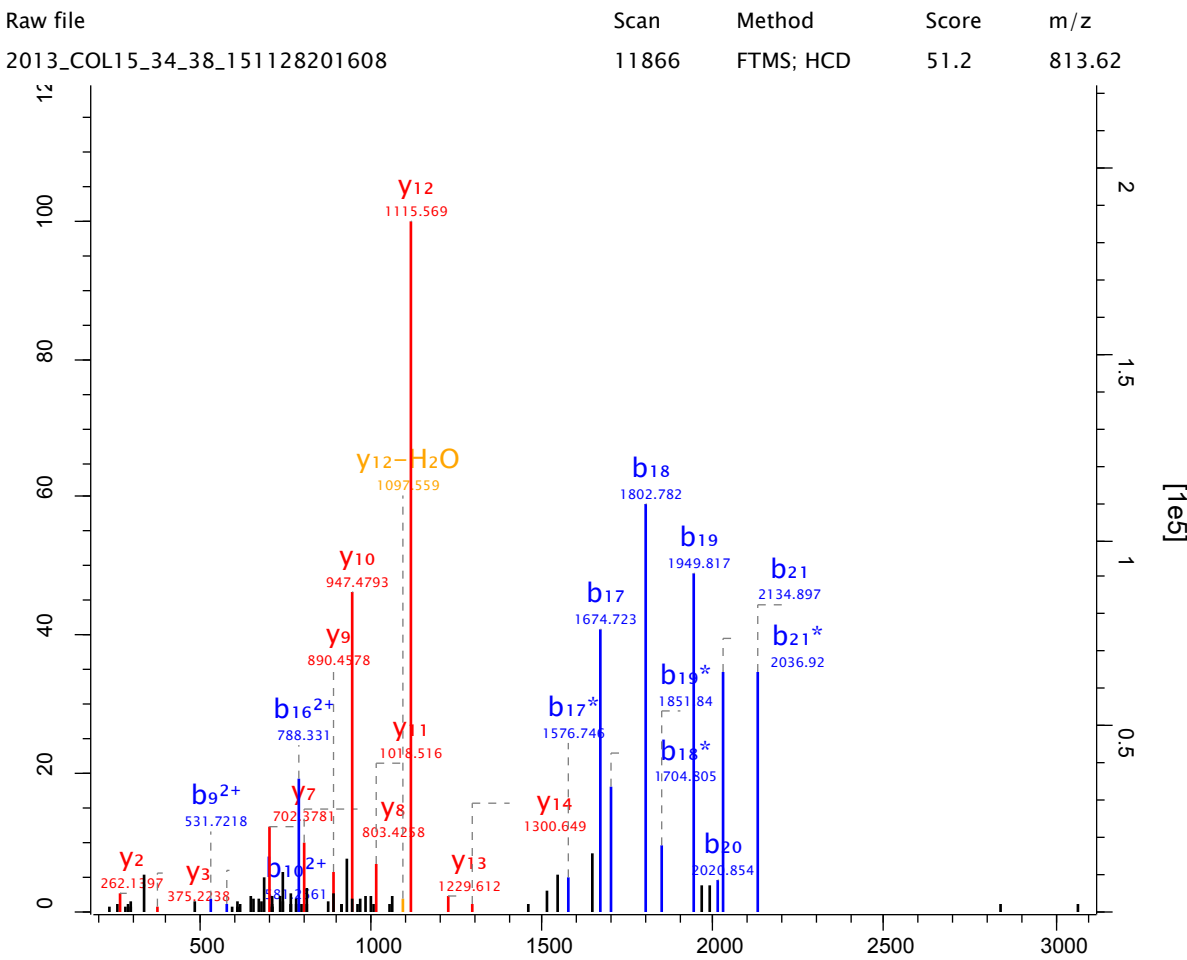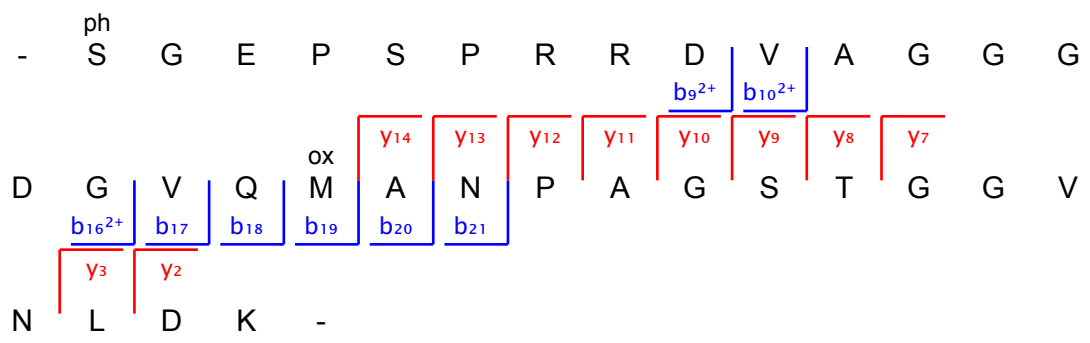

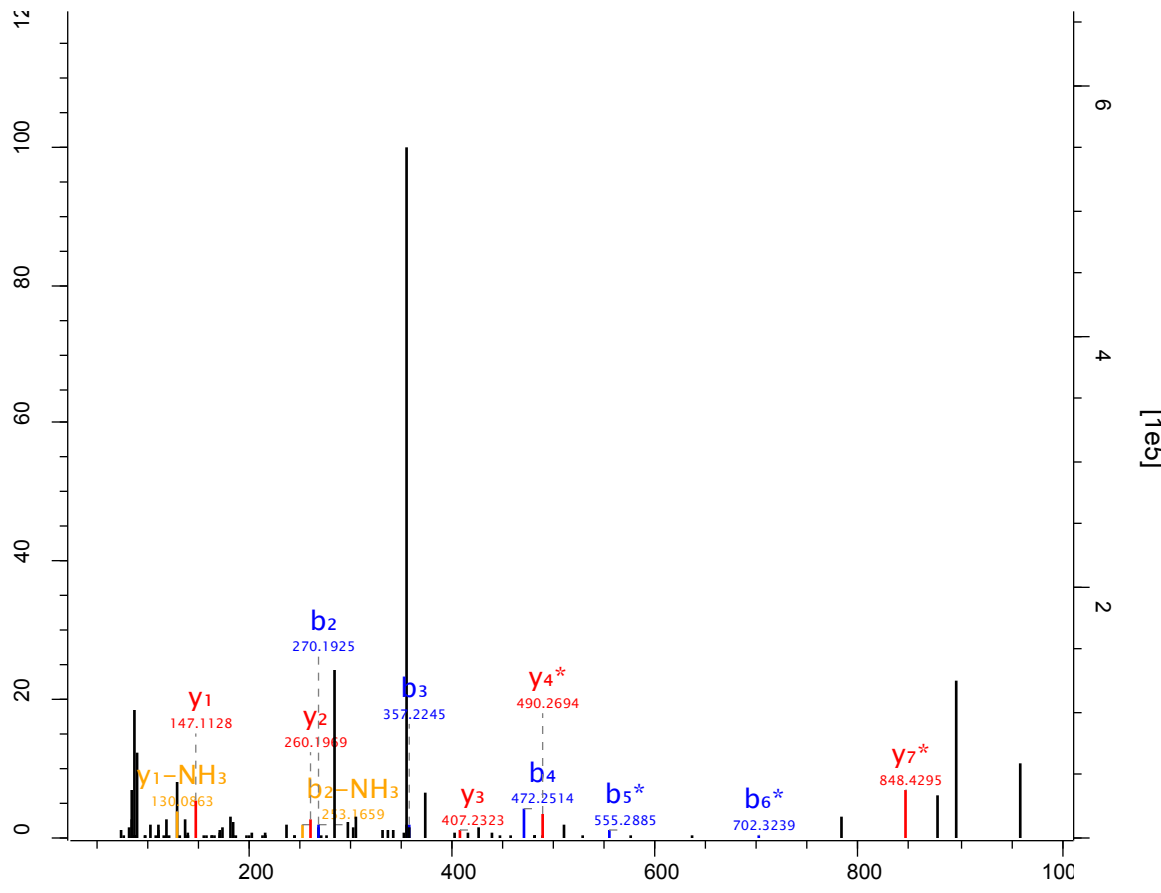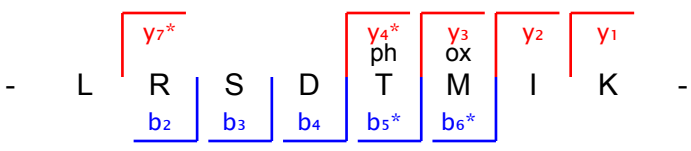

2013\_COL15\_34\_38\_151128201608

1192

FTMS; HCD

154.65

410.19

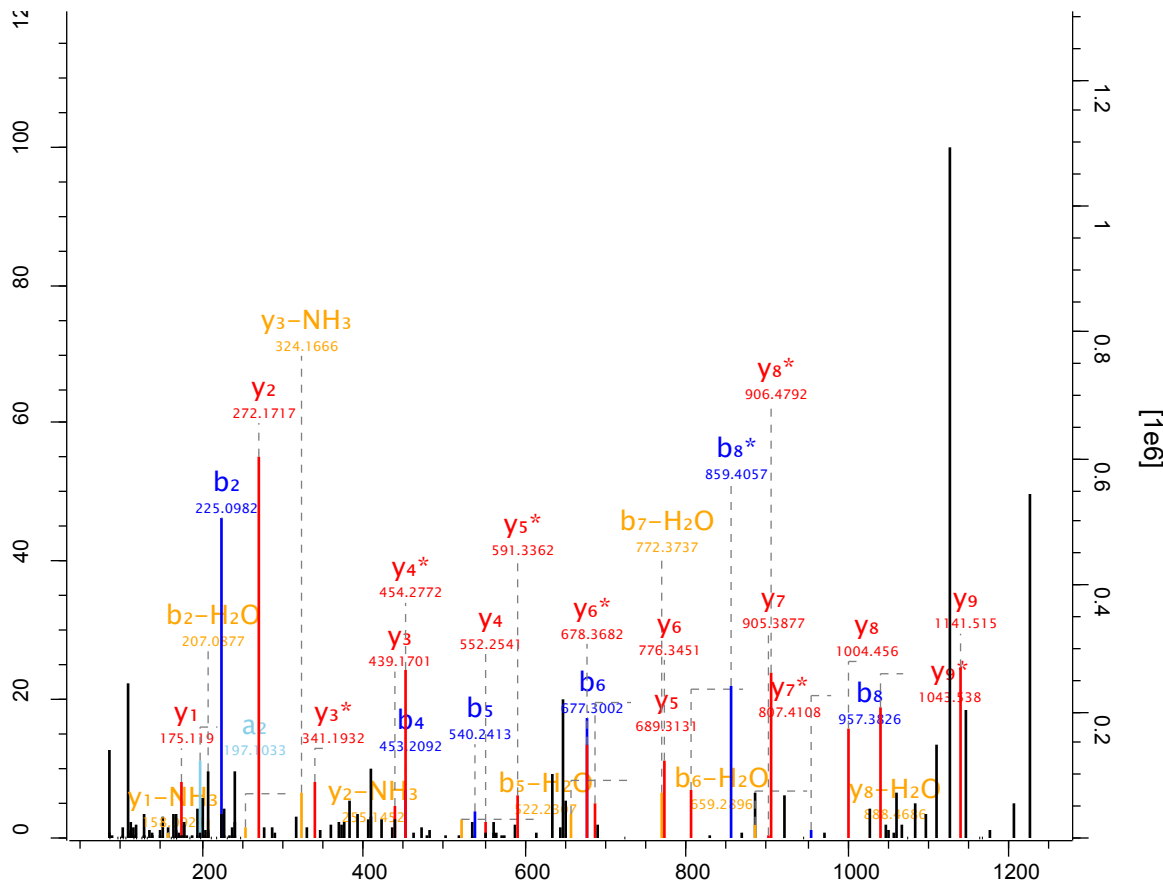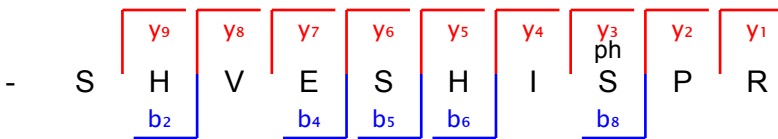

2013\_COL15\_34\_38\_151128201608

1193

FTMS; HCD

90.72

513.9

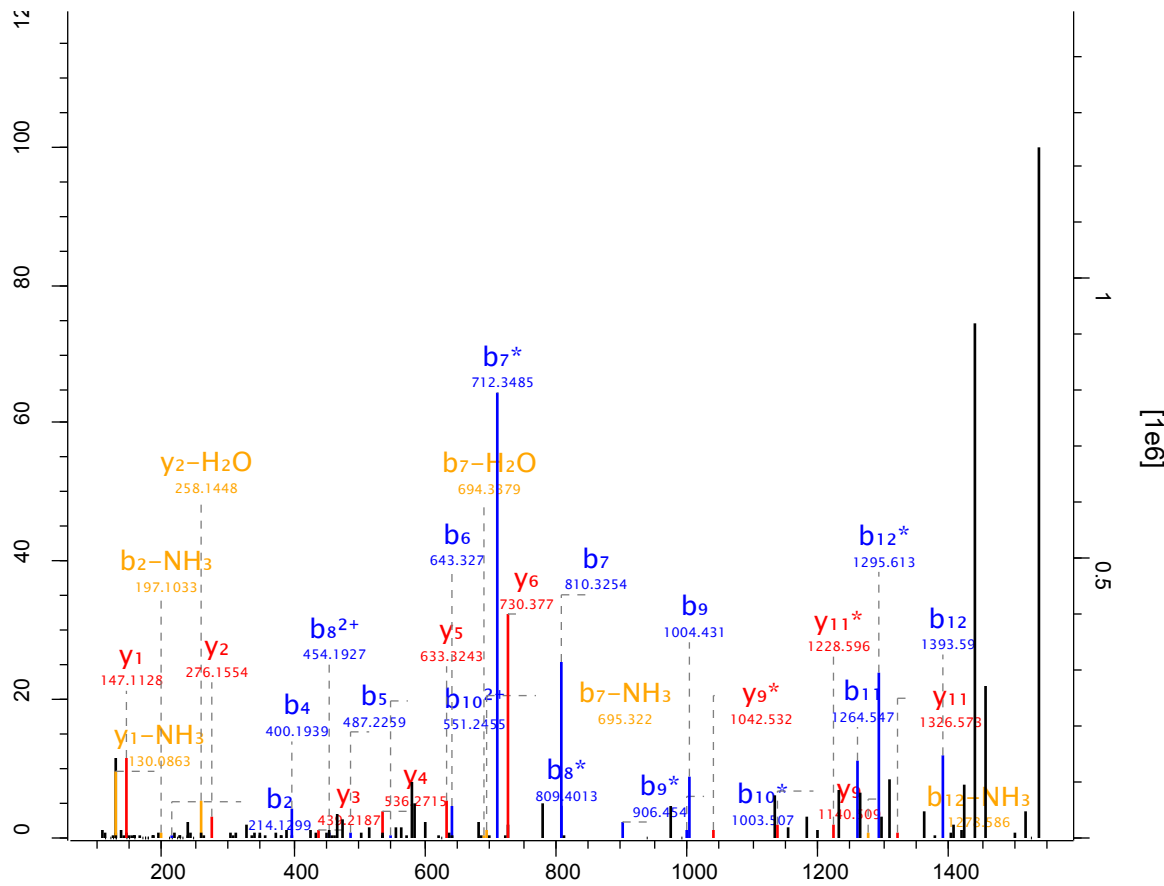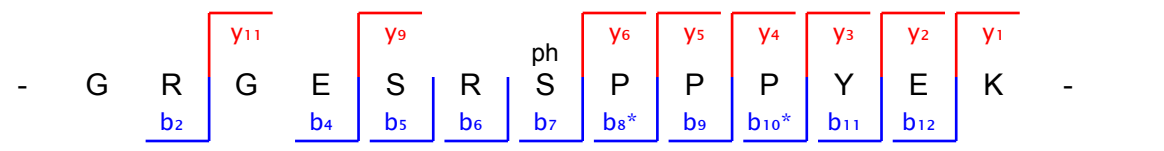

2013\_COL15\_34\_38\_151128201608

11949

FTMS; HCD

49.3

631.8

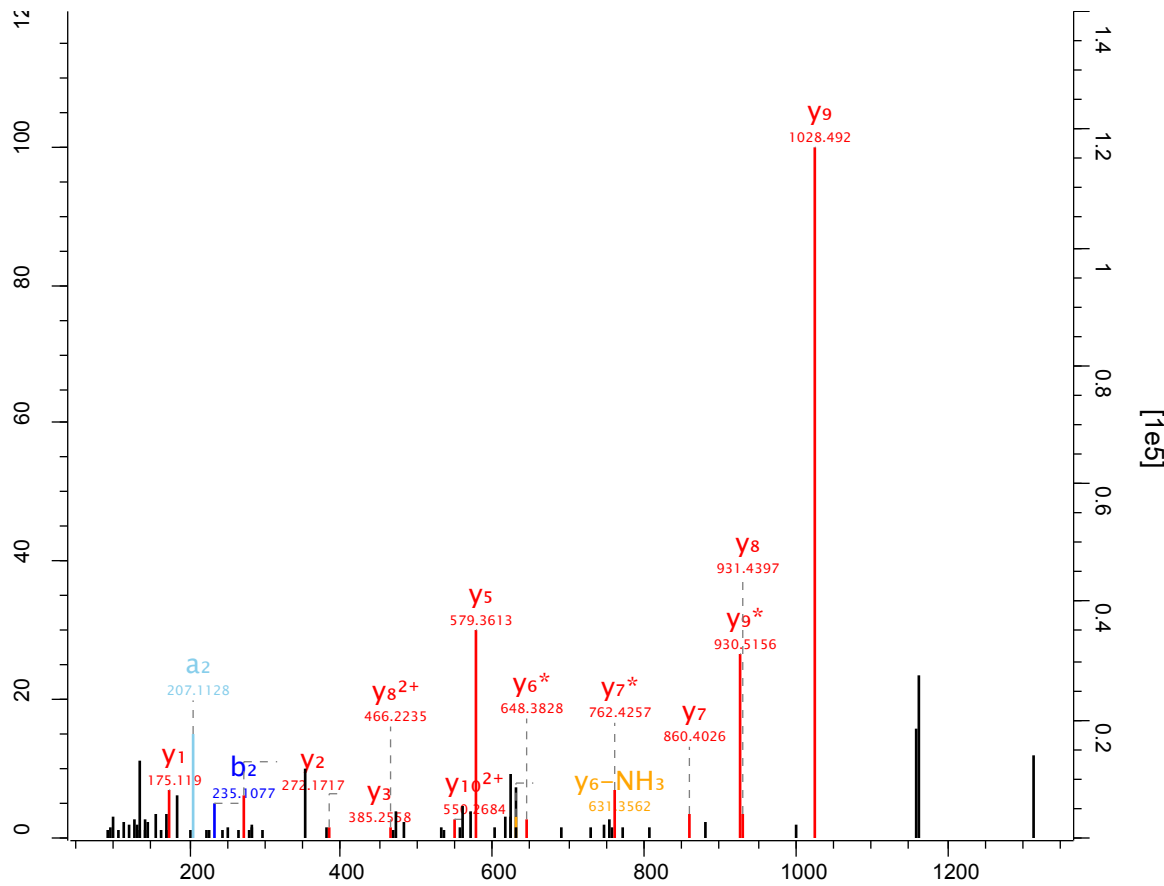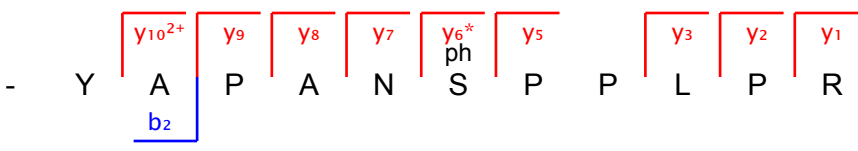

2013\_COL15\_34\_38\_151128201608

12000

FTMS; HCD

43.31

523.23

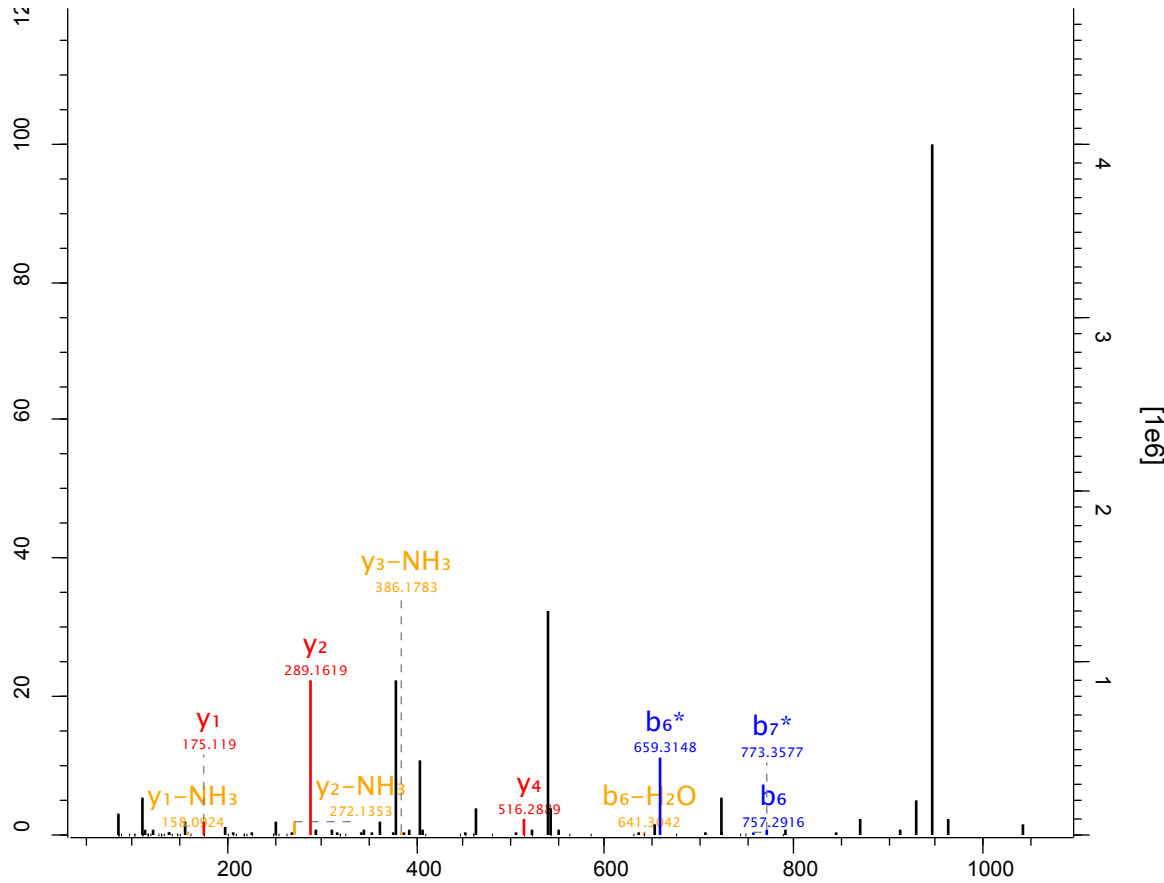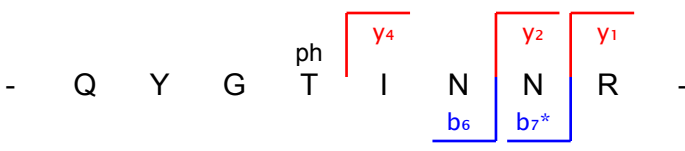

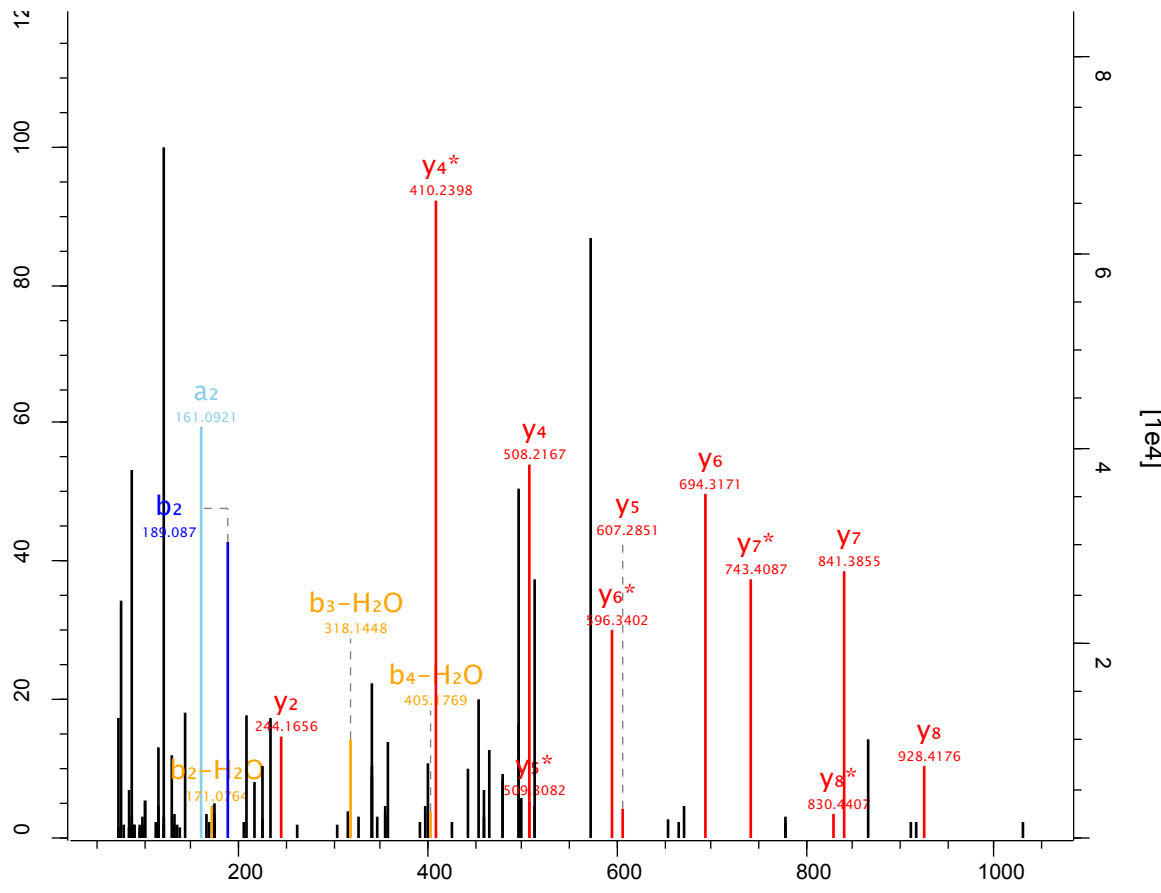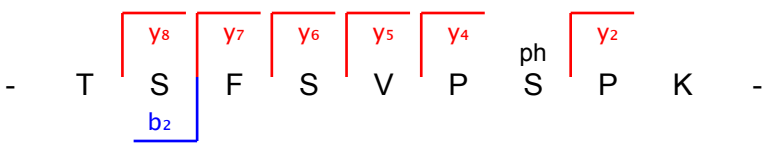

2013\_COL15\_34\_38\_151128201608

12062

FTMS; HCD

102.64

504.92

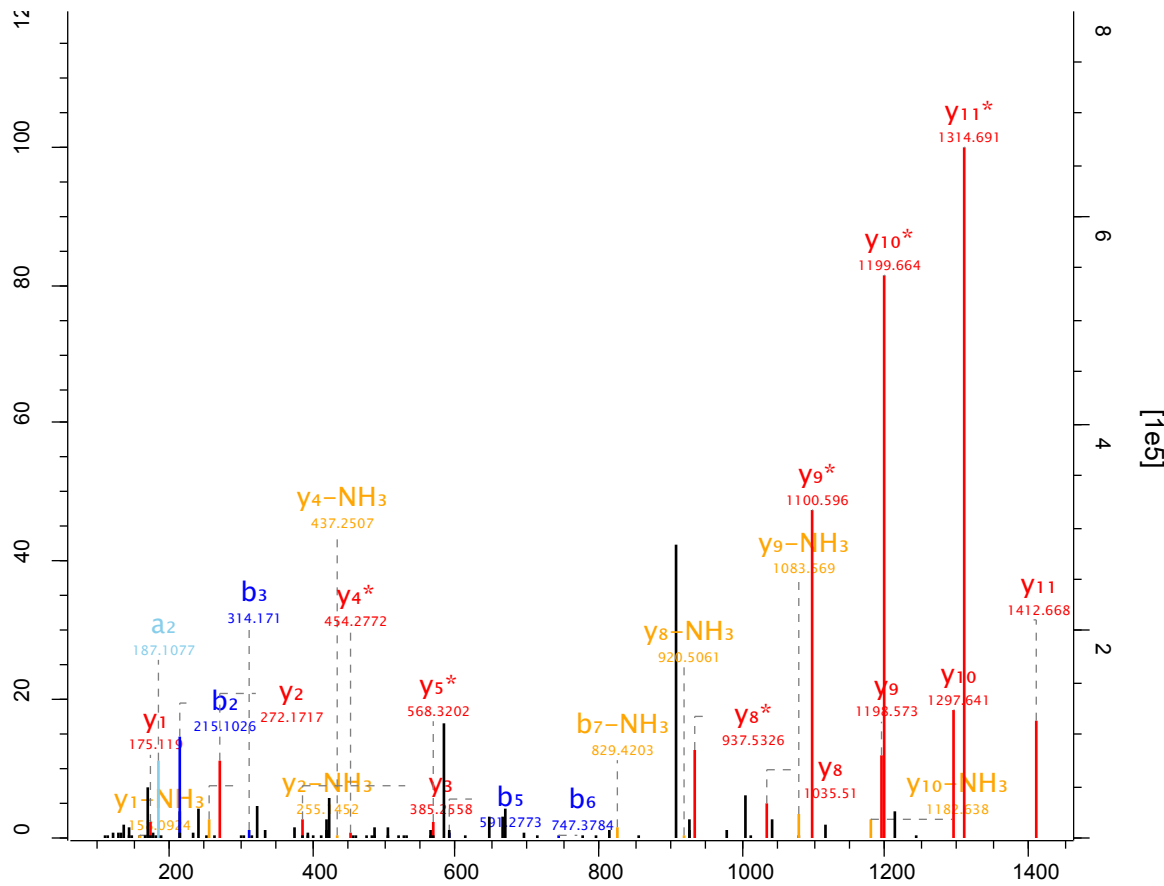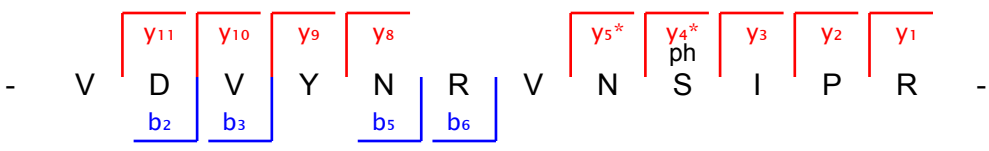



2013\_COL15\_34\_38\_151128201608

12112

FTMS; HCD

43.21

826.37

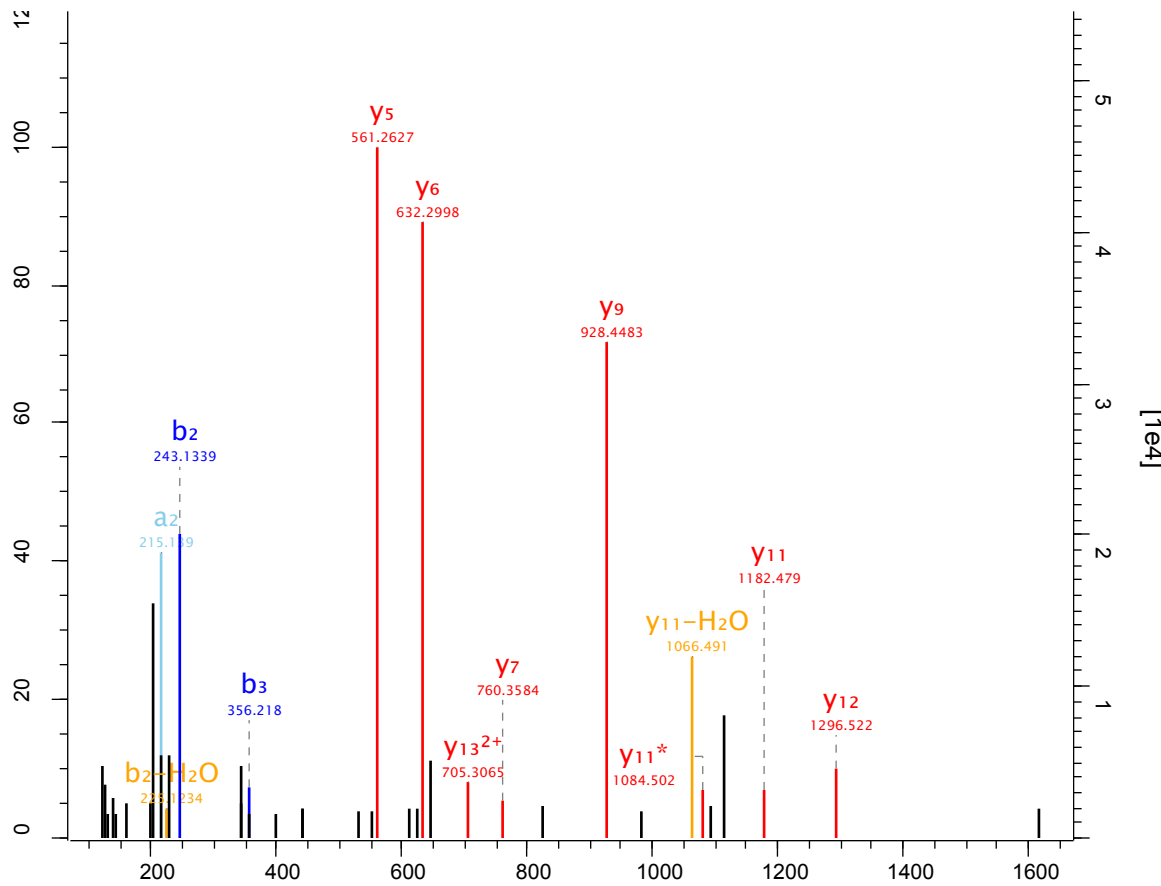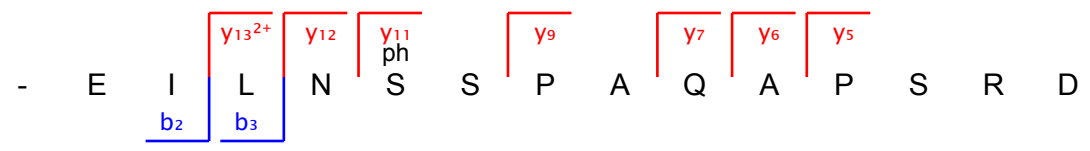

S -

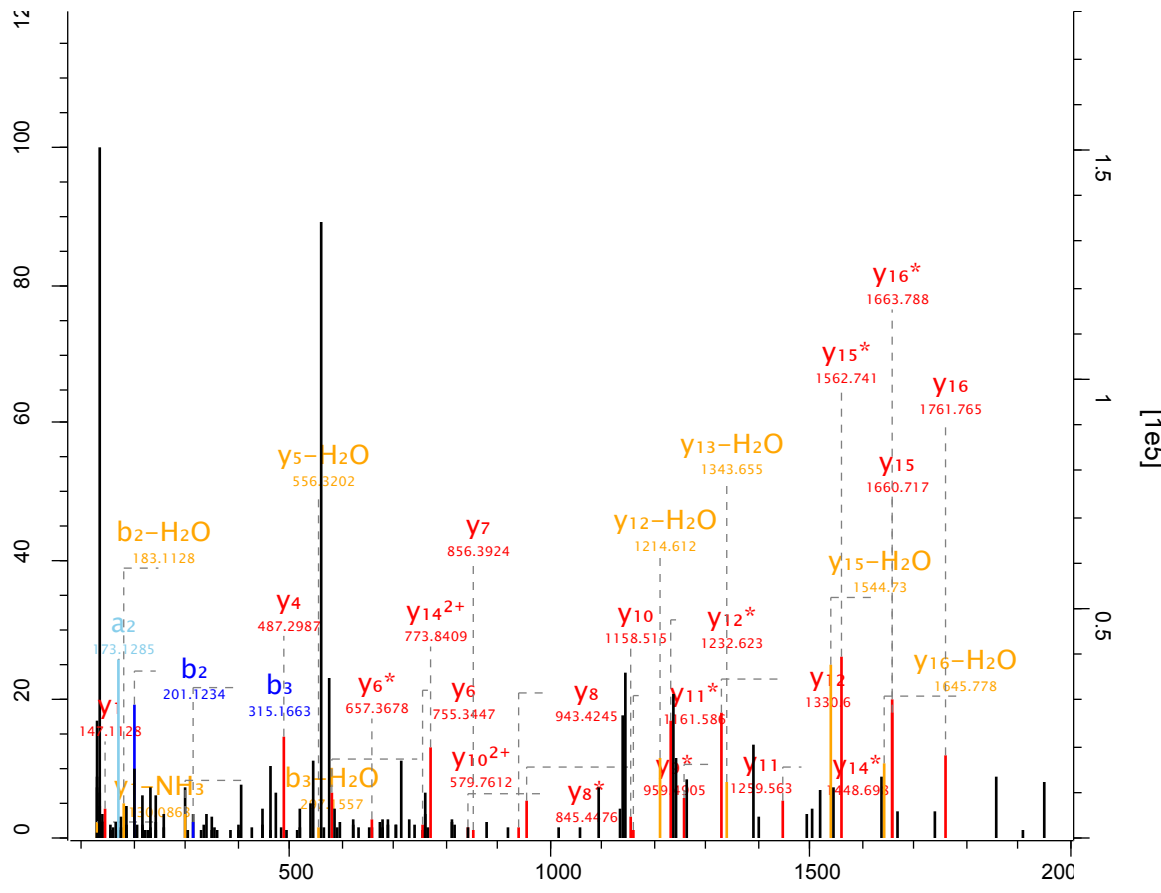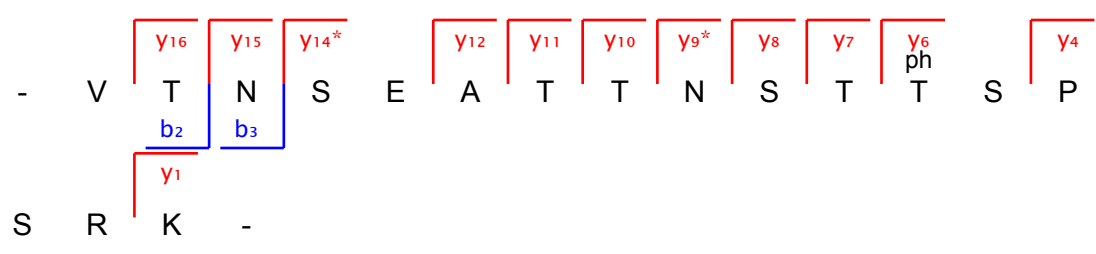

2013\_COL15\_34\_38\_151128201608

12194

FTMS; HCD

88.09

622.77

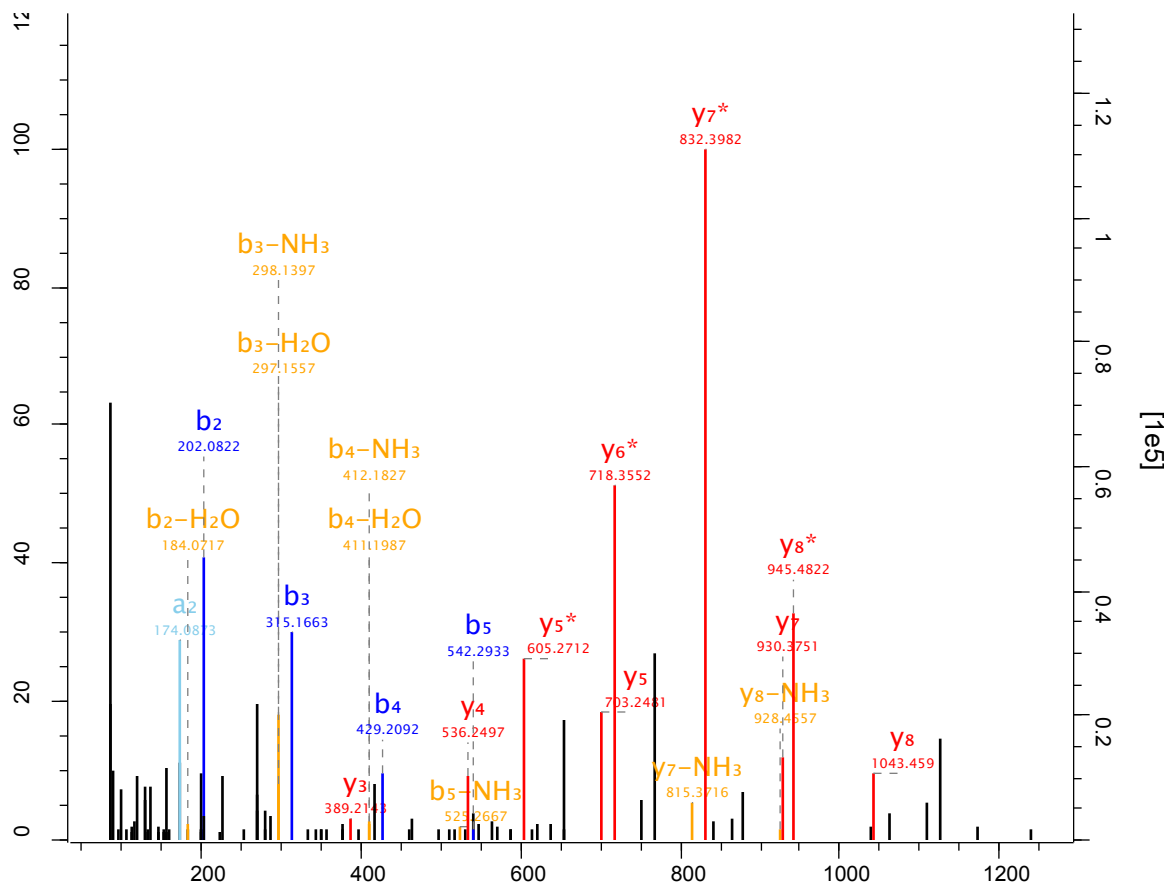

- N S L N I S M R D V -

b<sub>2</sub>
b<sub>3</sub>
b<sub>4</sub>
b<sub>5</sub>
y<sub>8</sub>
y<sub>7</sub>
y<sub>6</sub>\*
y<sub>5</sub>
y<sub>4</sub>
y<sub>3</sub>

2013\_COL15\_34\_38\_151128201608

12226

FTMS; HCD

131.69

592.79

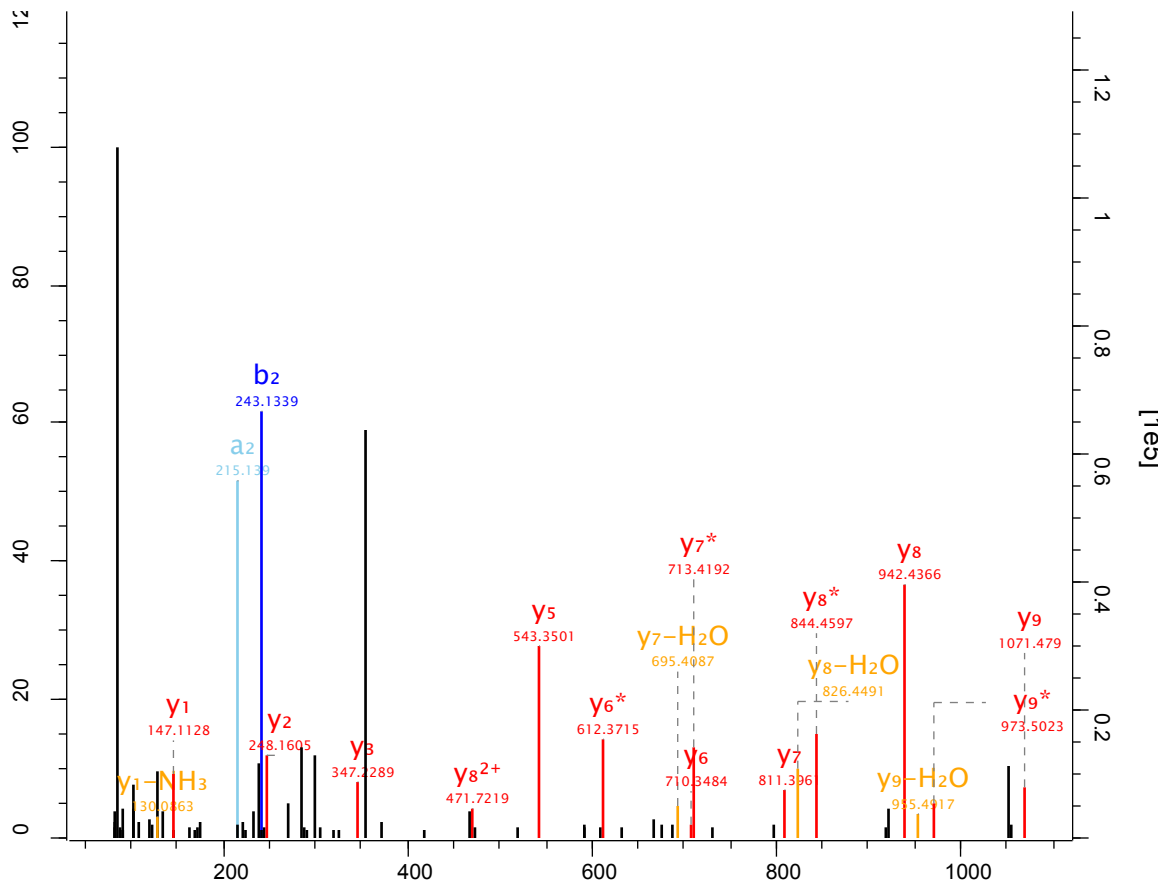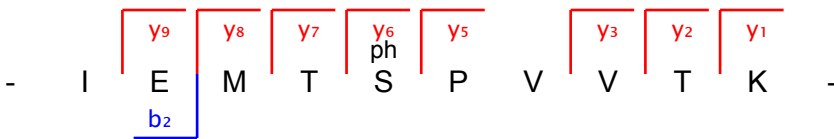

2013\_COL15\_34\_38\_151128201608

12259

FTMS; HCD

83.95

422.2

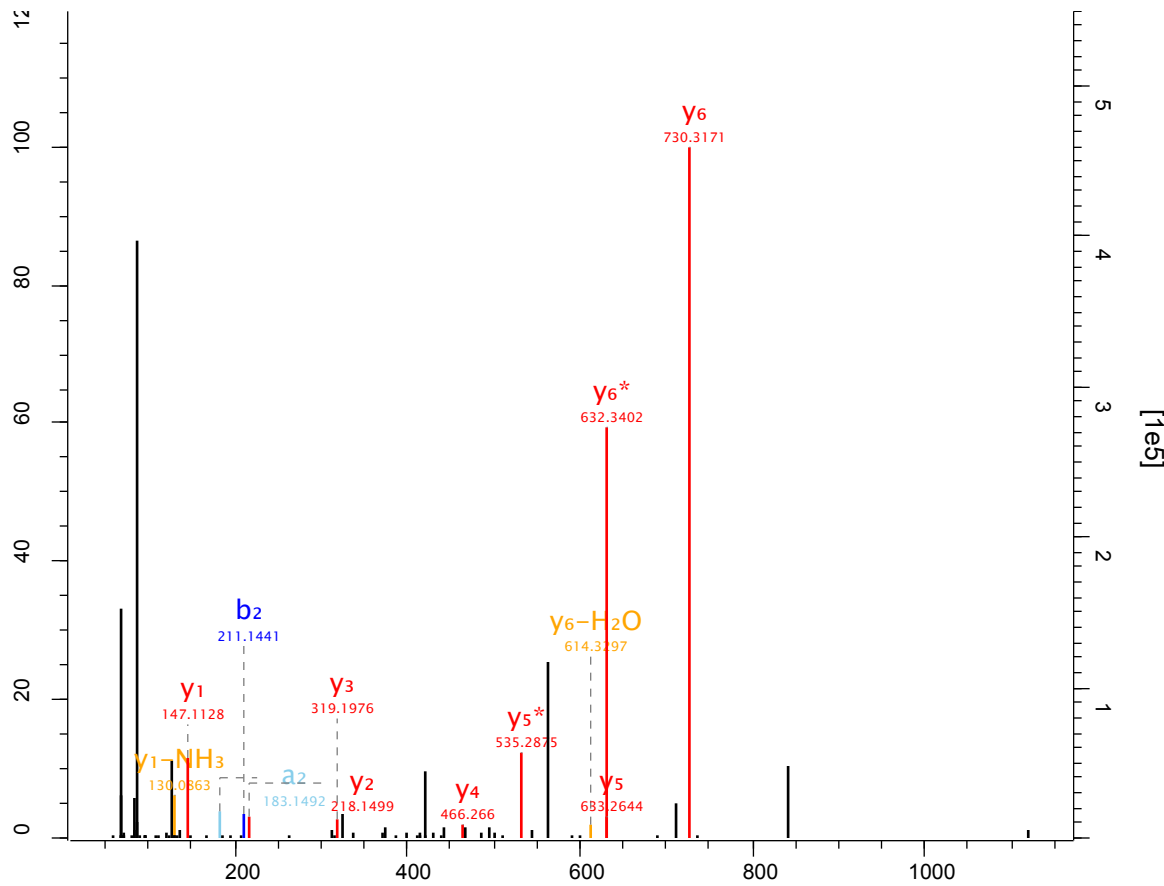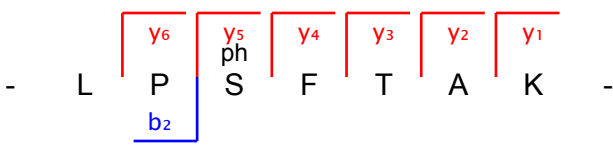

2013\_COL15\_34\_38\_151128201608

12303

FTMS; HCD

88.28

657.24

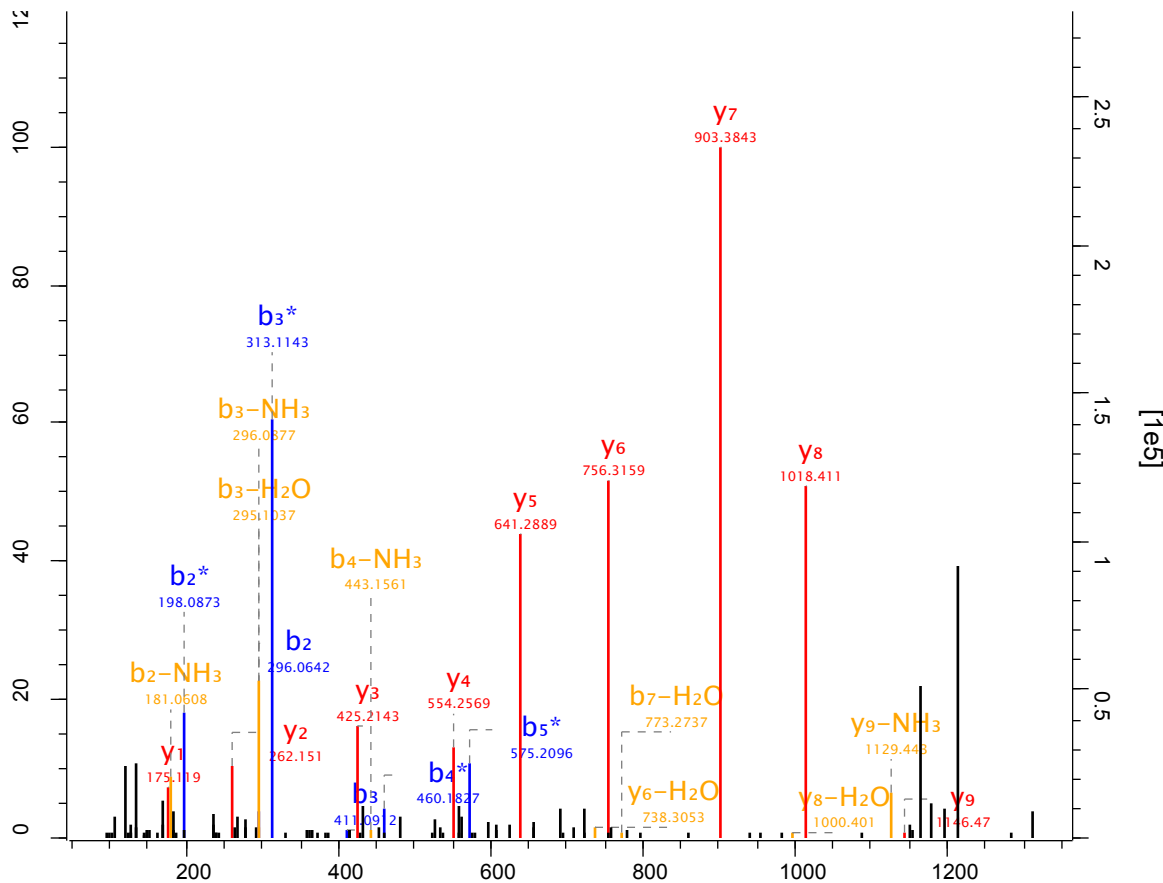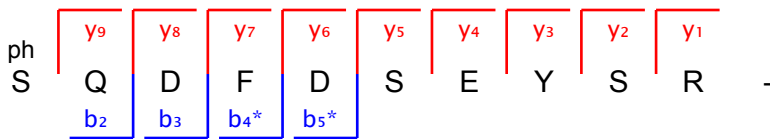



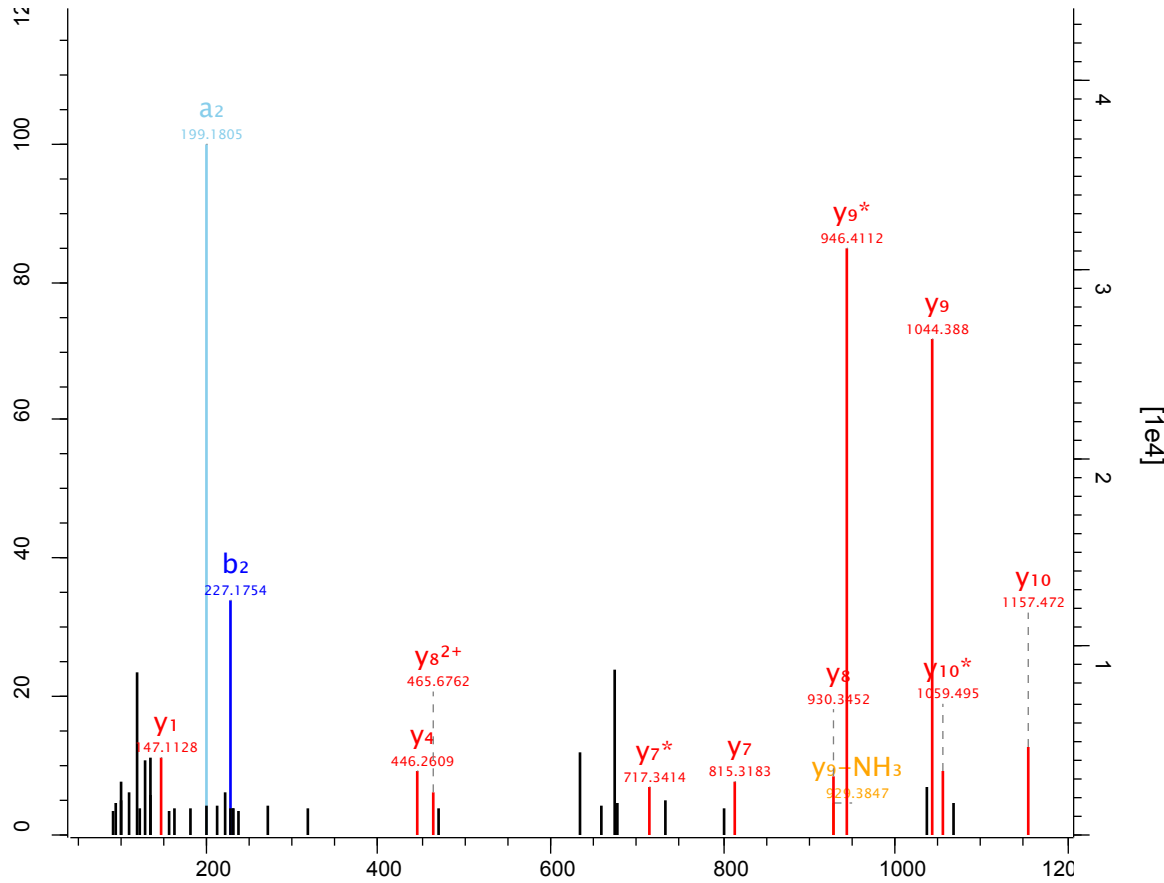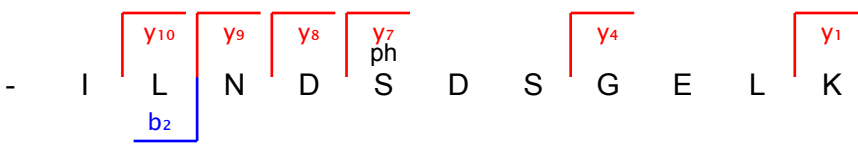



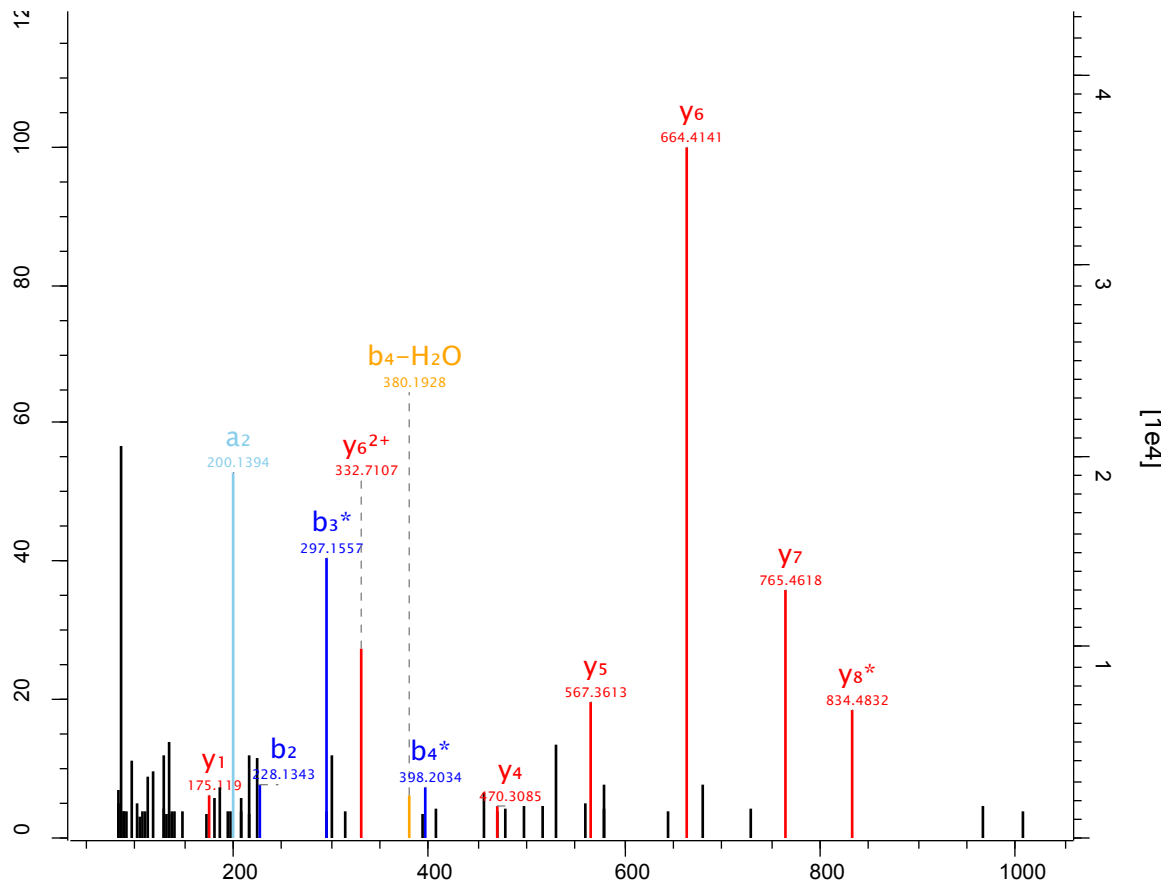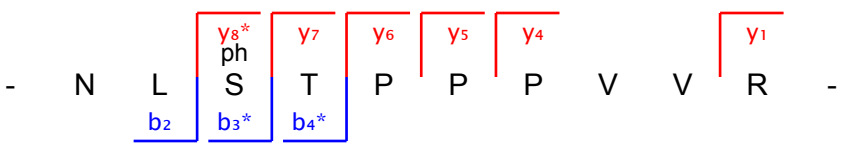

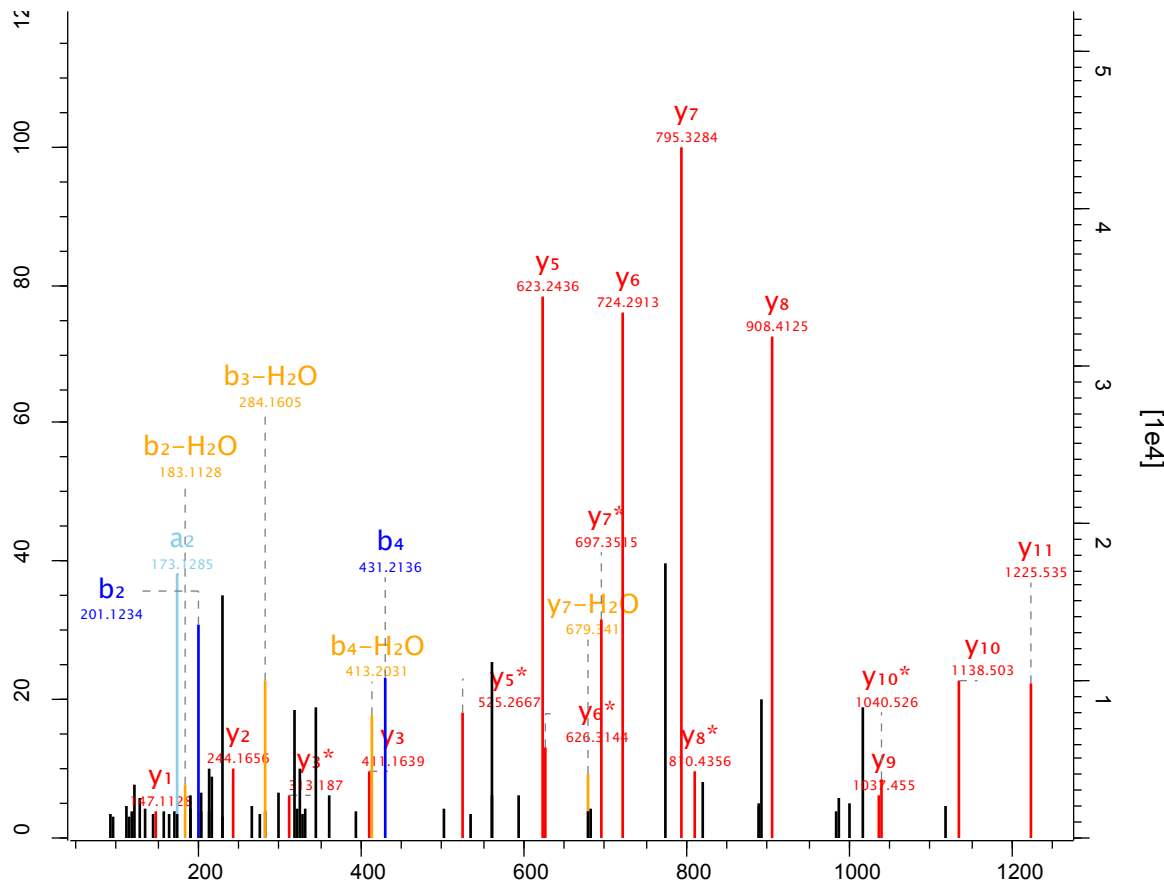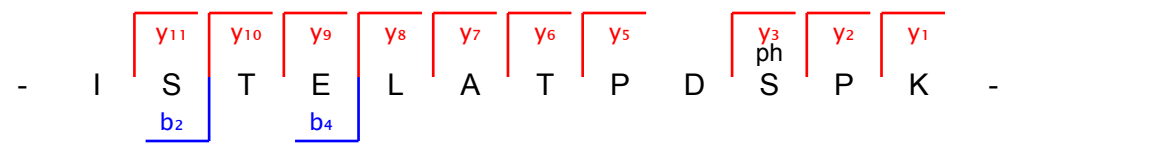

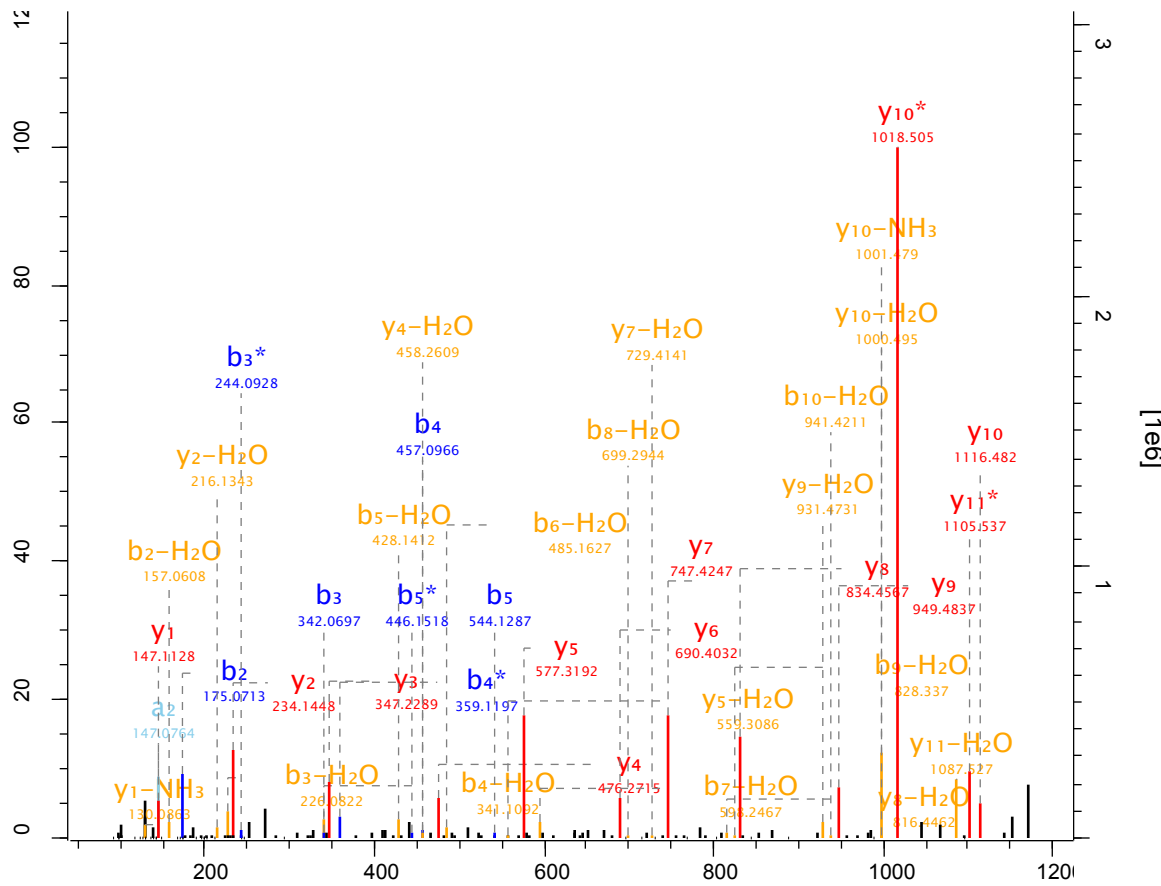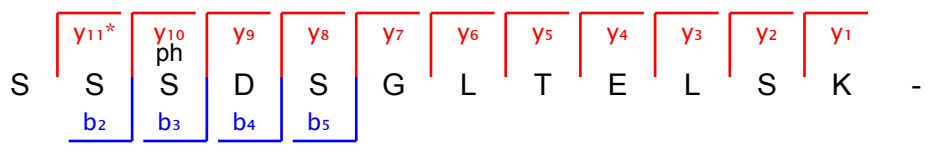

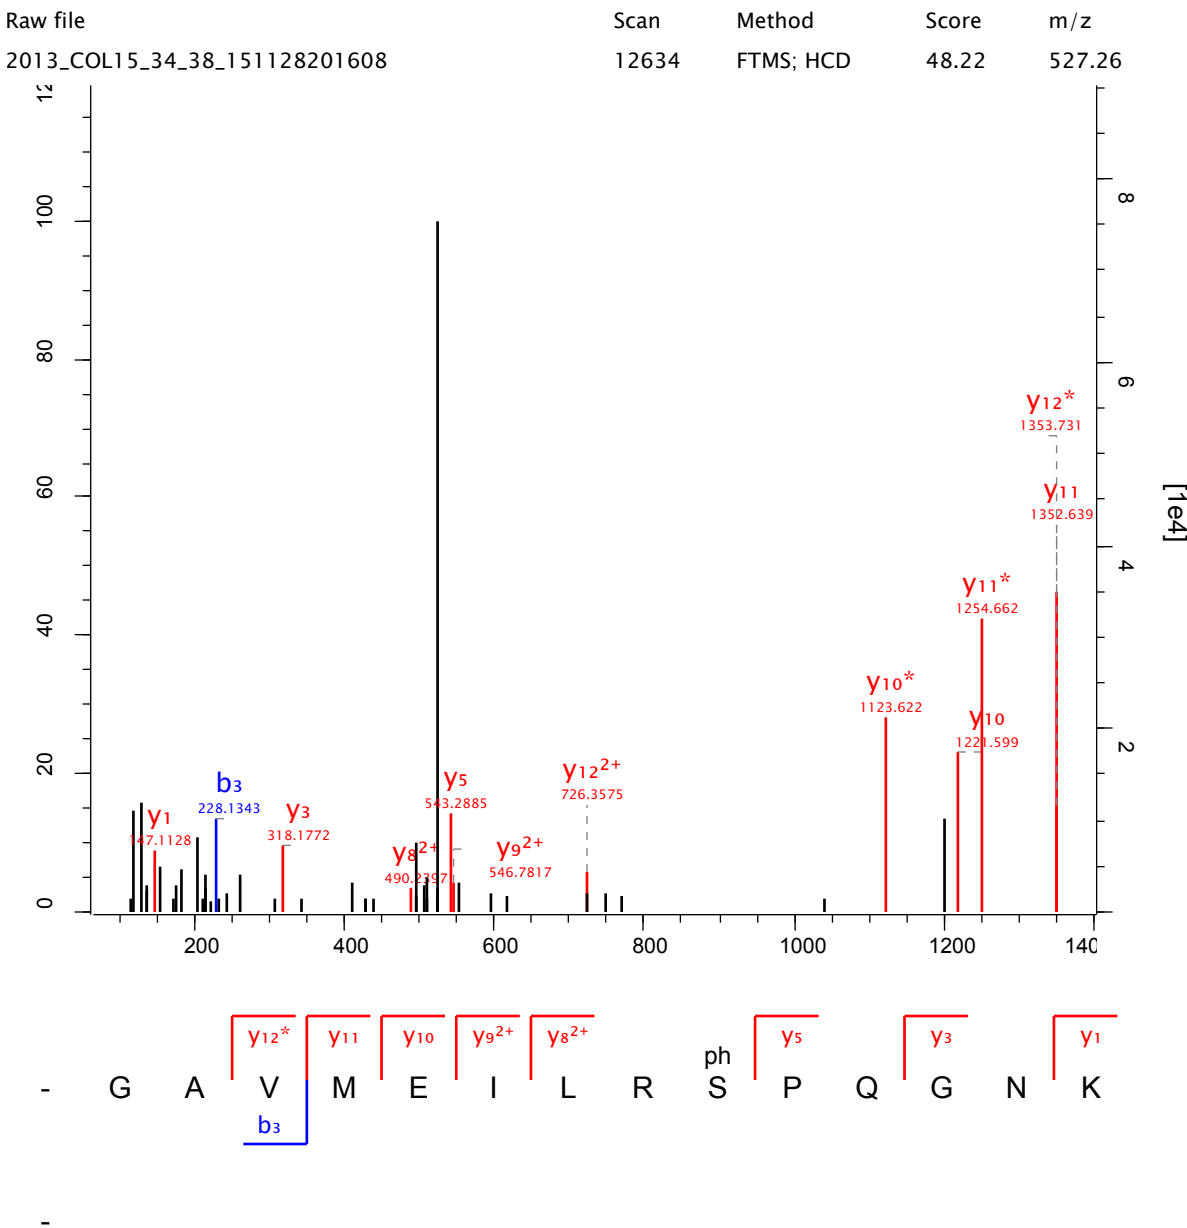

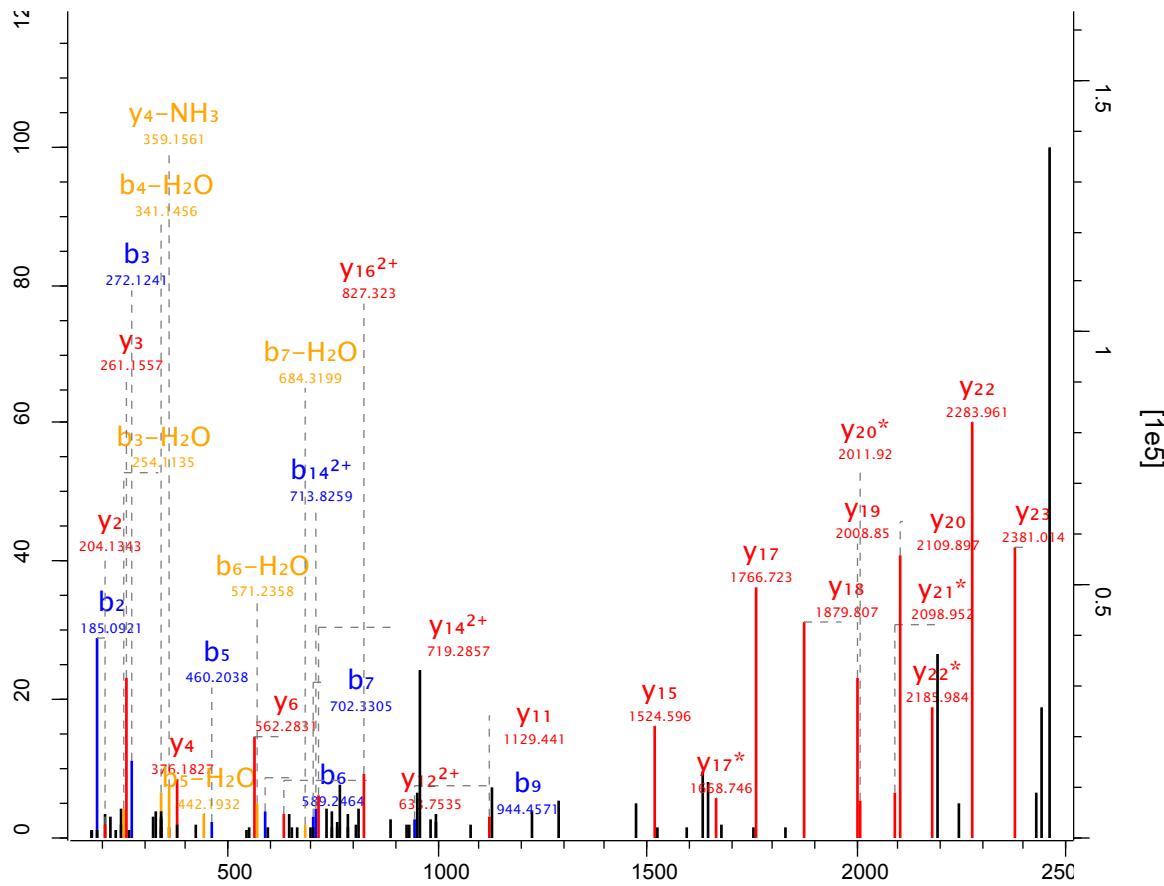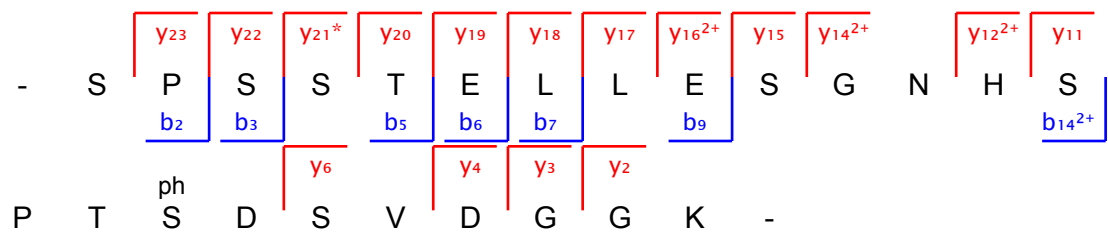

Raw file Scan Method Score m/z  
 2013\_COL15\_34\_38\_151128201608 12777 FTMS; HCD 58.85 602.58

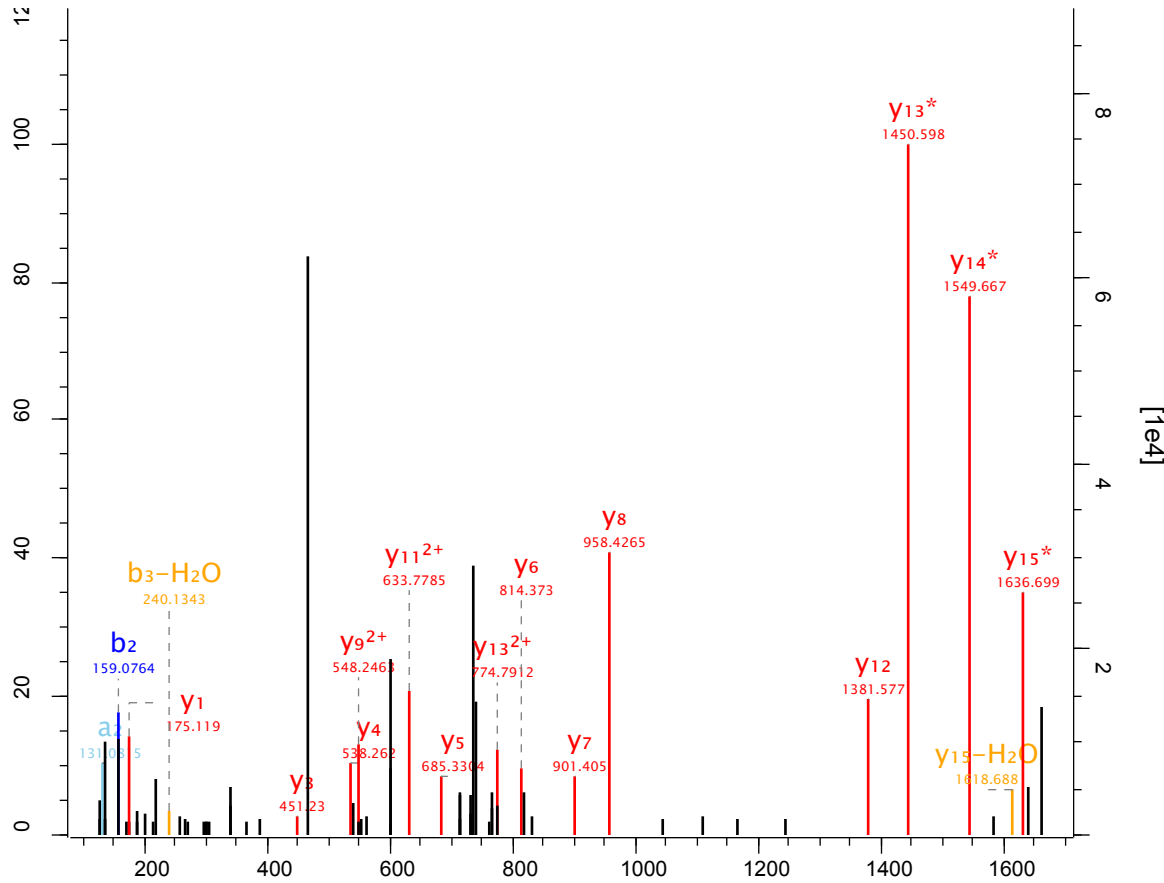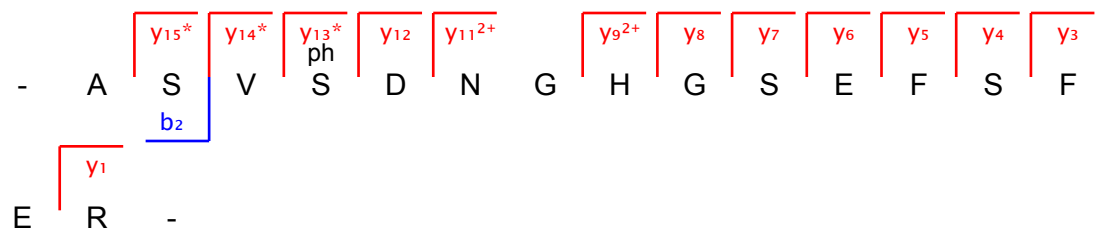

Raw file 2013\_COL15\_34\_38\_151128201608 Scan 12931 Method FTMS; HCD Score 40.38 m/z 587.23

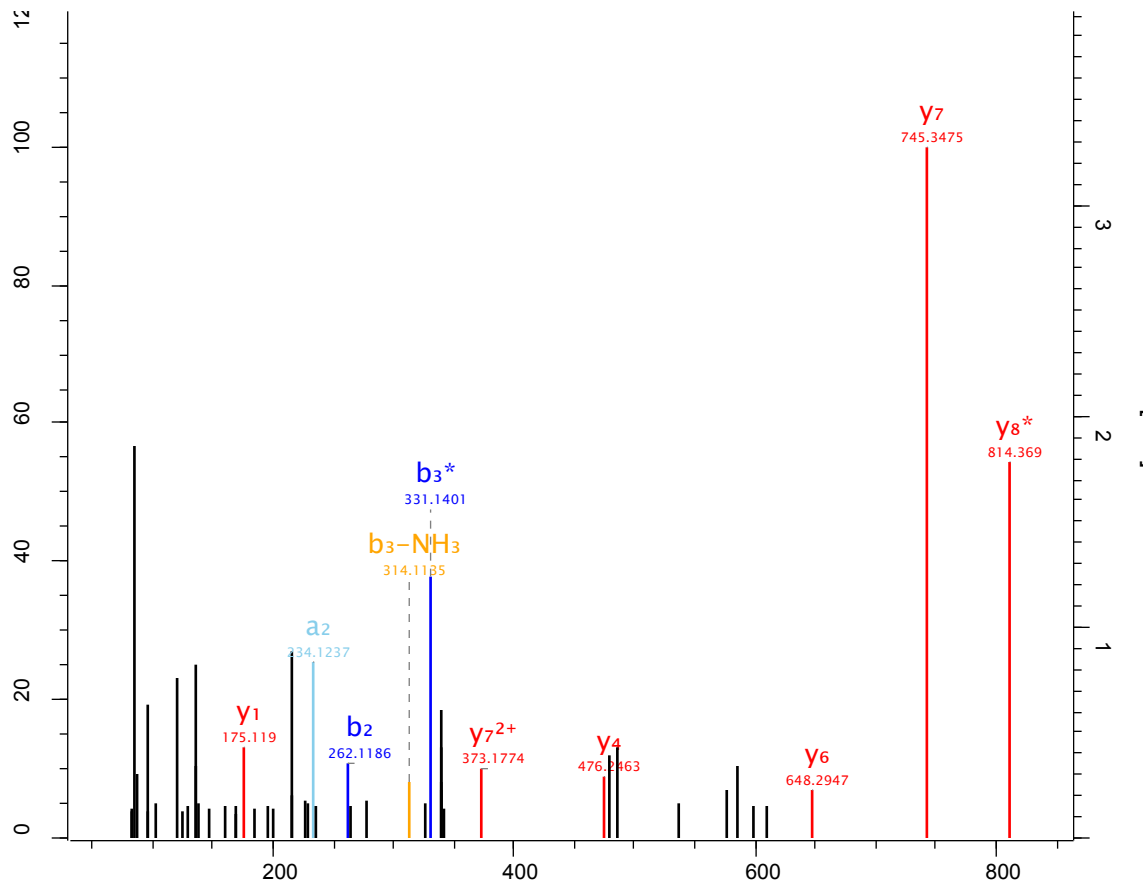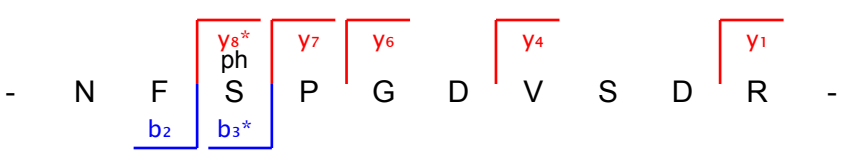

Raw file  
 2013\_COL15\_34\_38\_151128201608

Scan 1294 Method FTMS; HCD Score 63.19 m/z 452.87

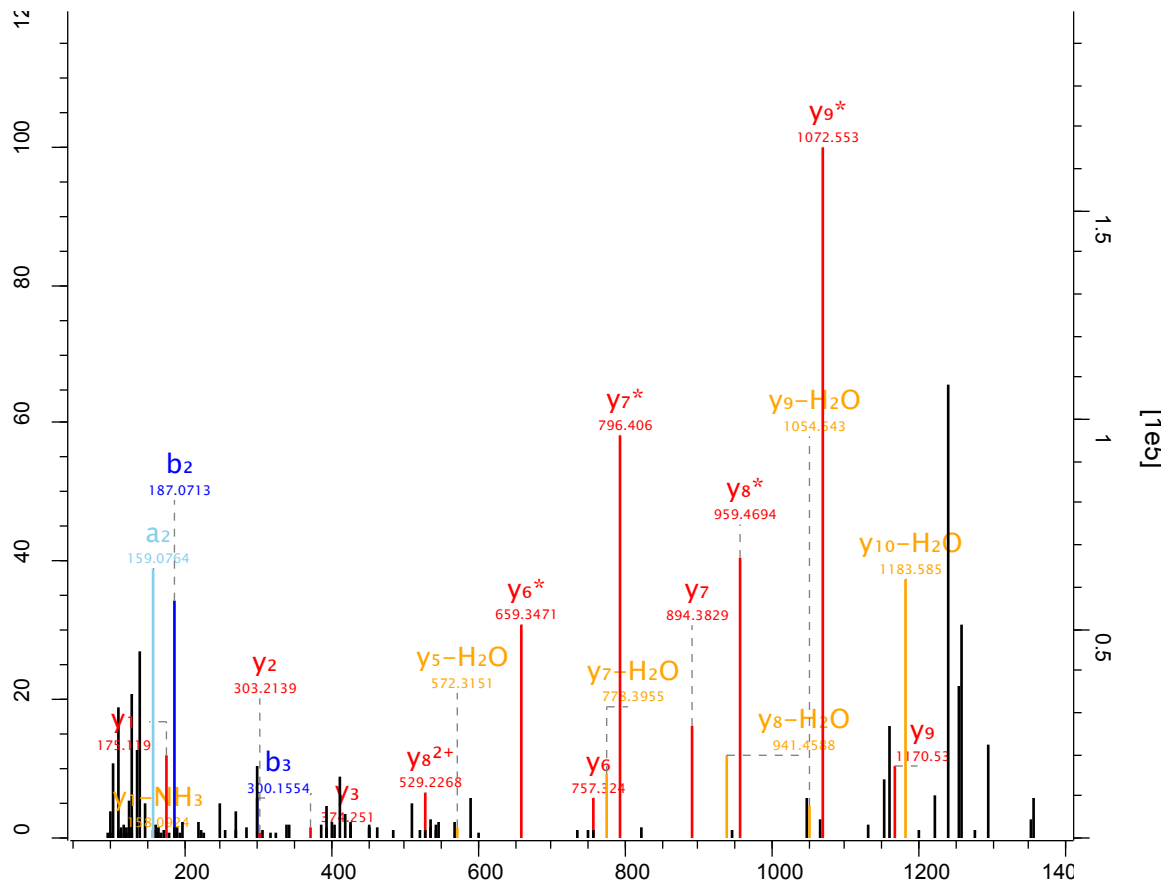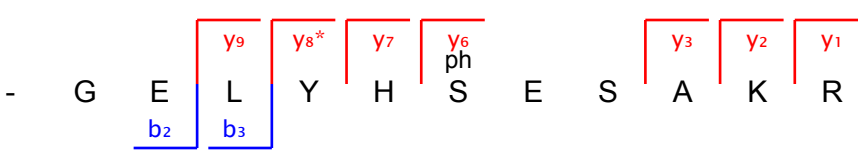



2013\_COL15\_34\_38\_151128201608

12969

FTMS; HCD

68.48

537.27

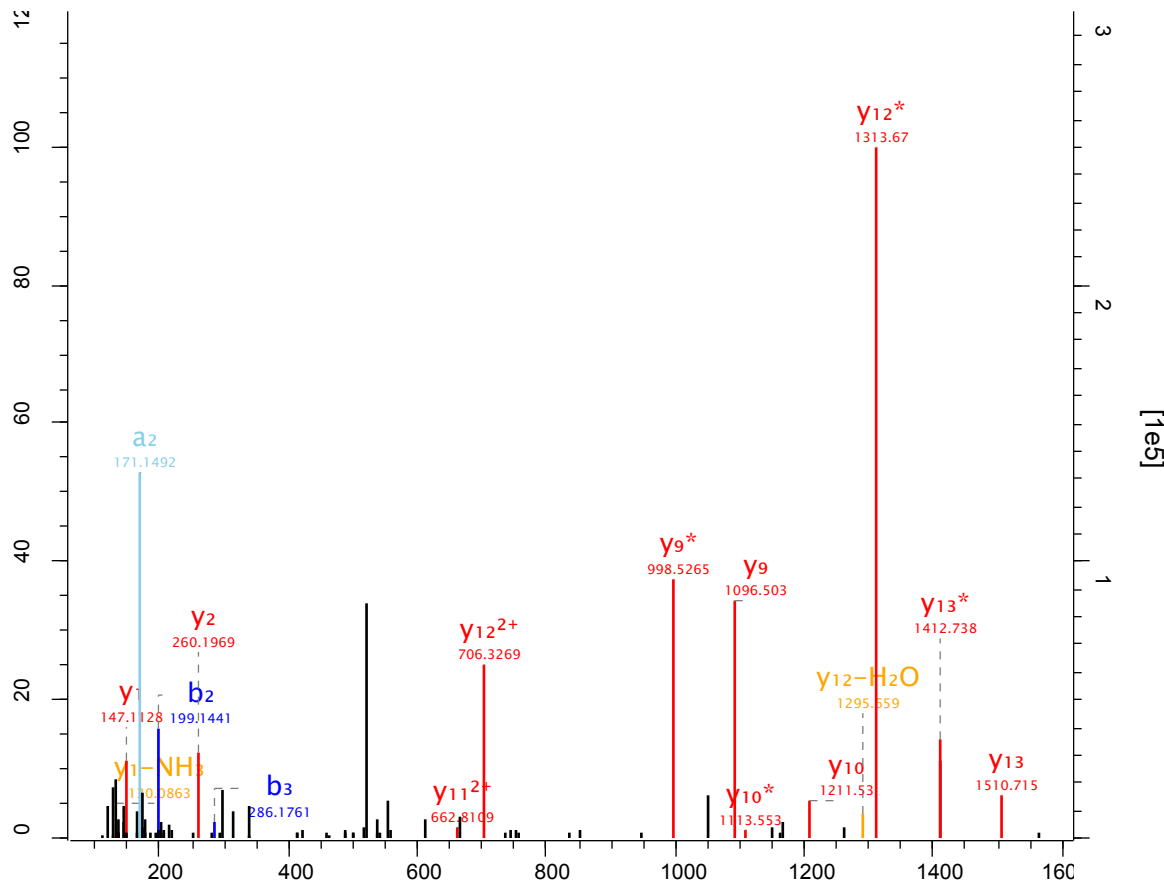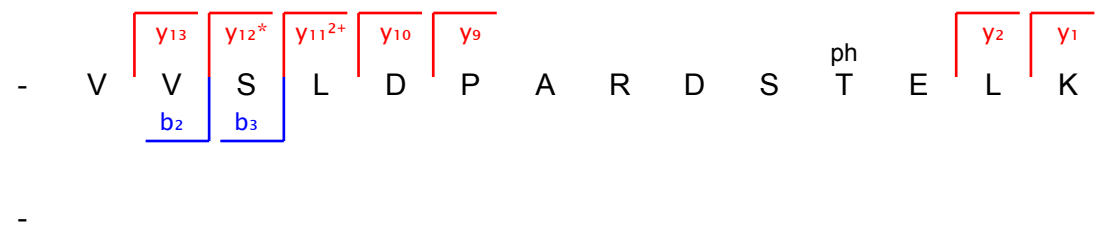

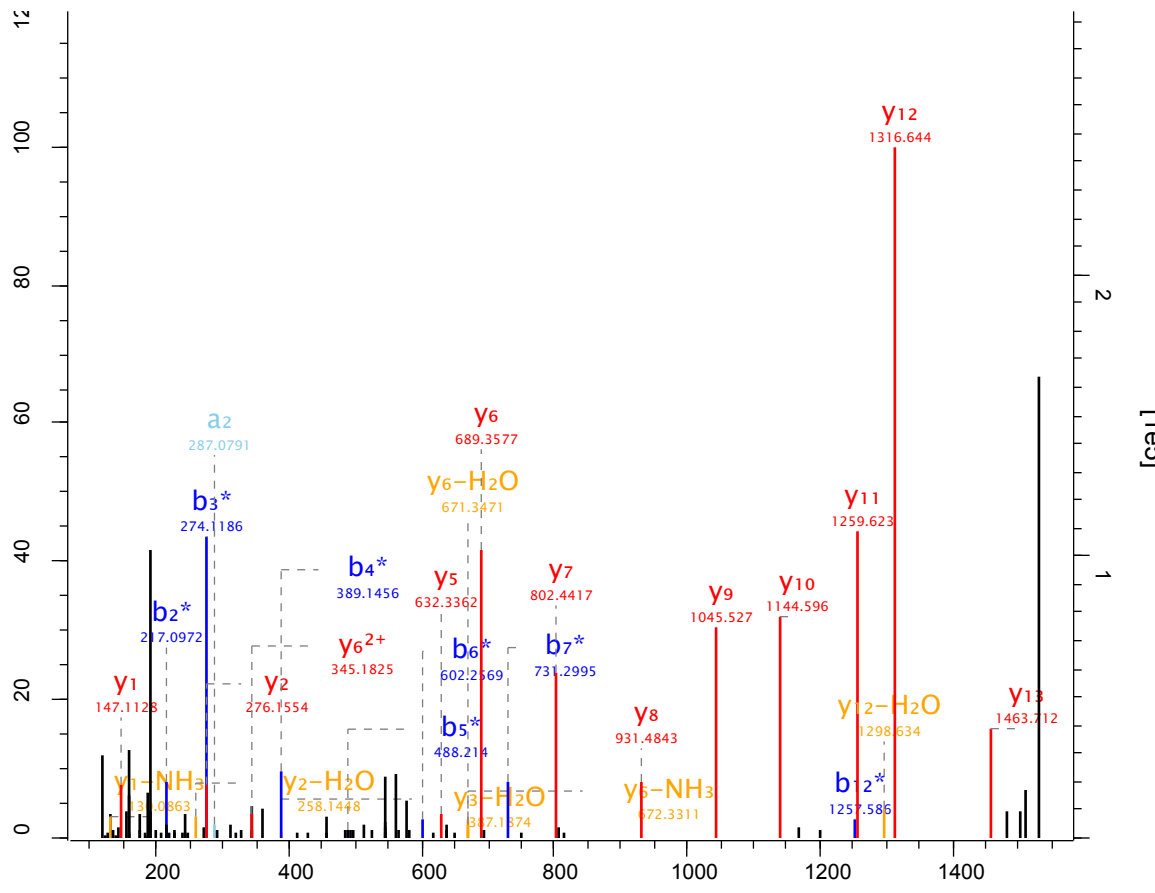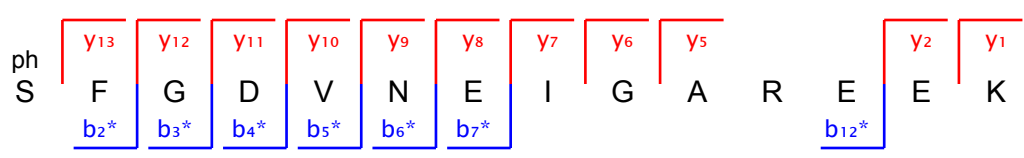

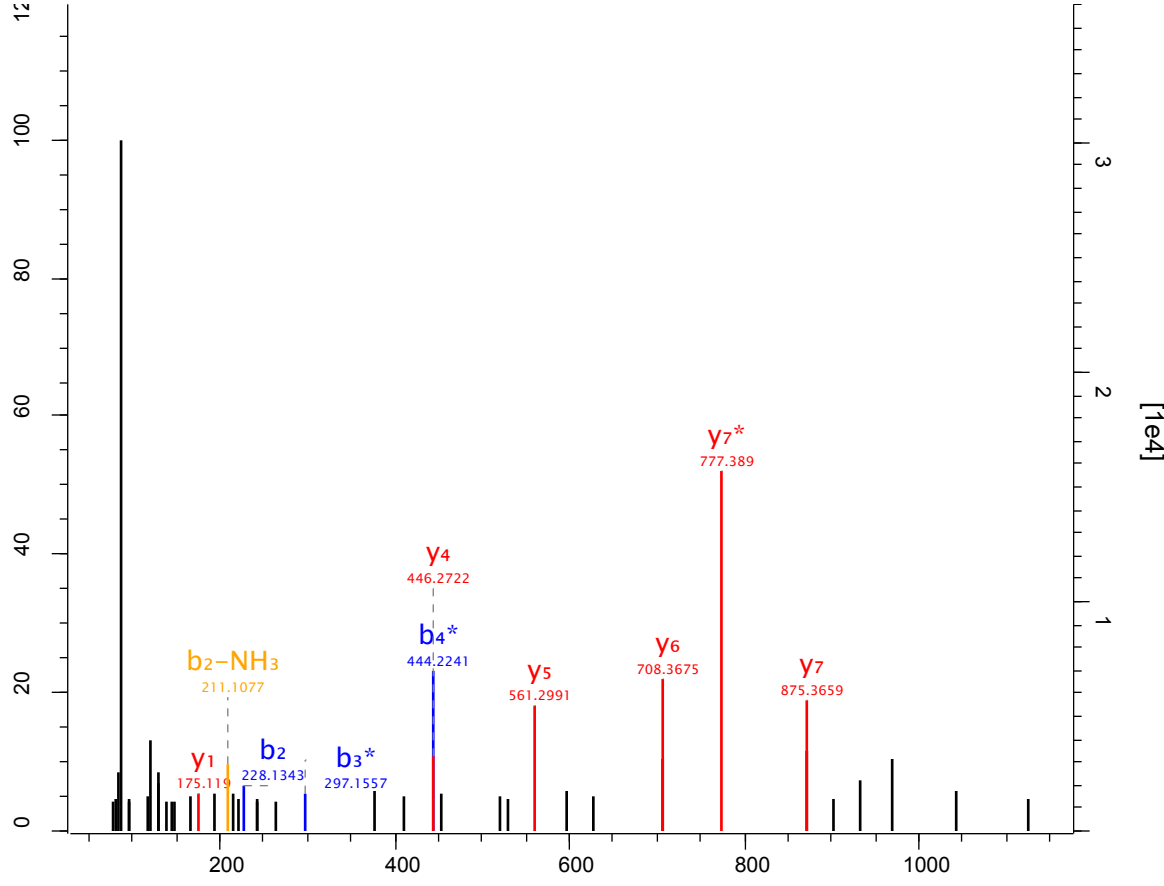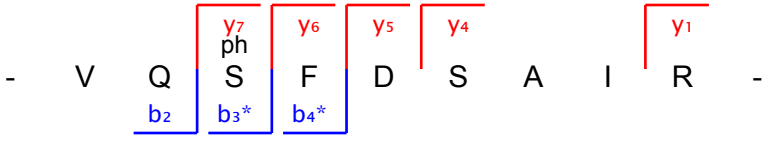

2013\_COL15\_34\_38\_151128201608

13146

FTMS; HCD

47.55

786.34

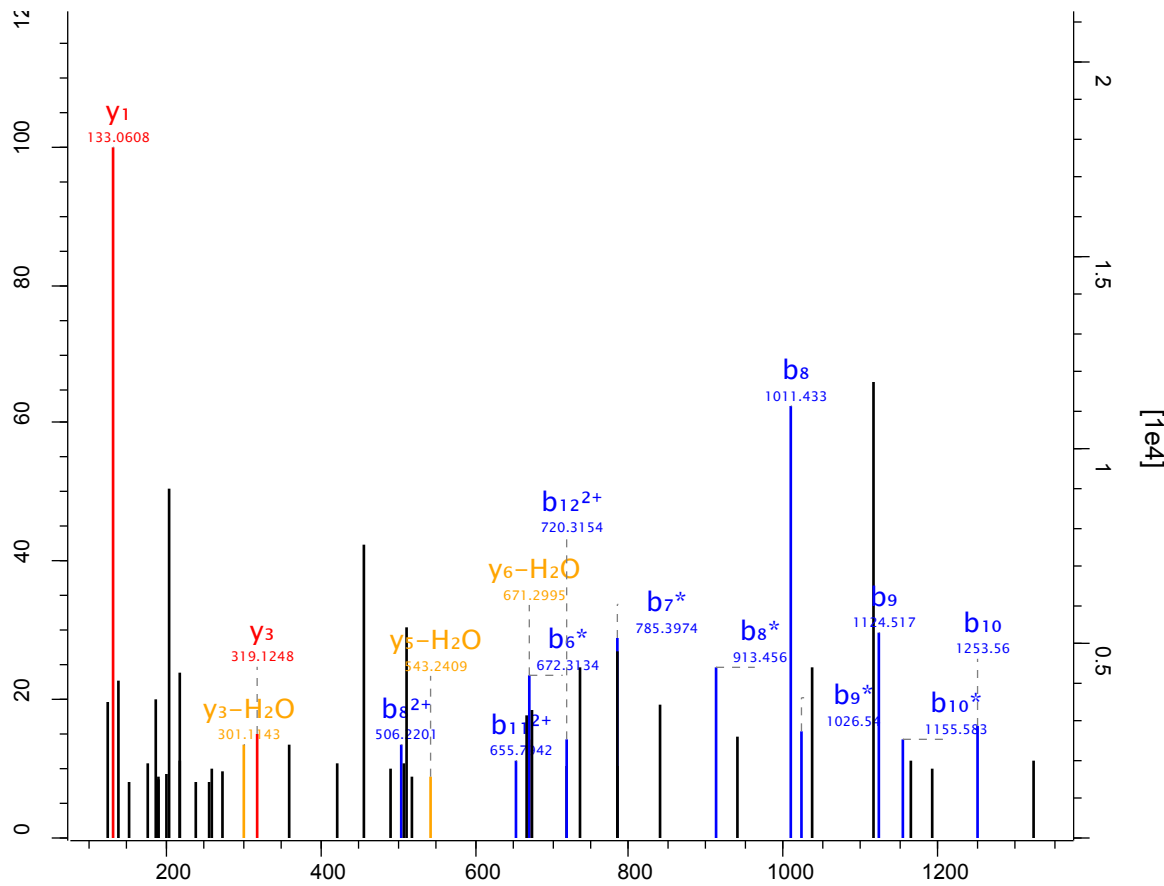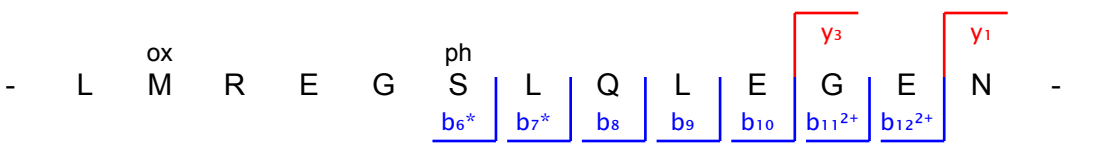

2013\_COL15\_34\_38\_151128201608

13303

FTMS; HCD

85.35

548.23

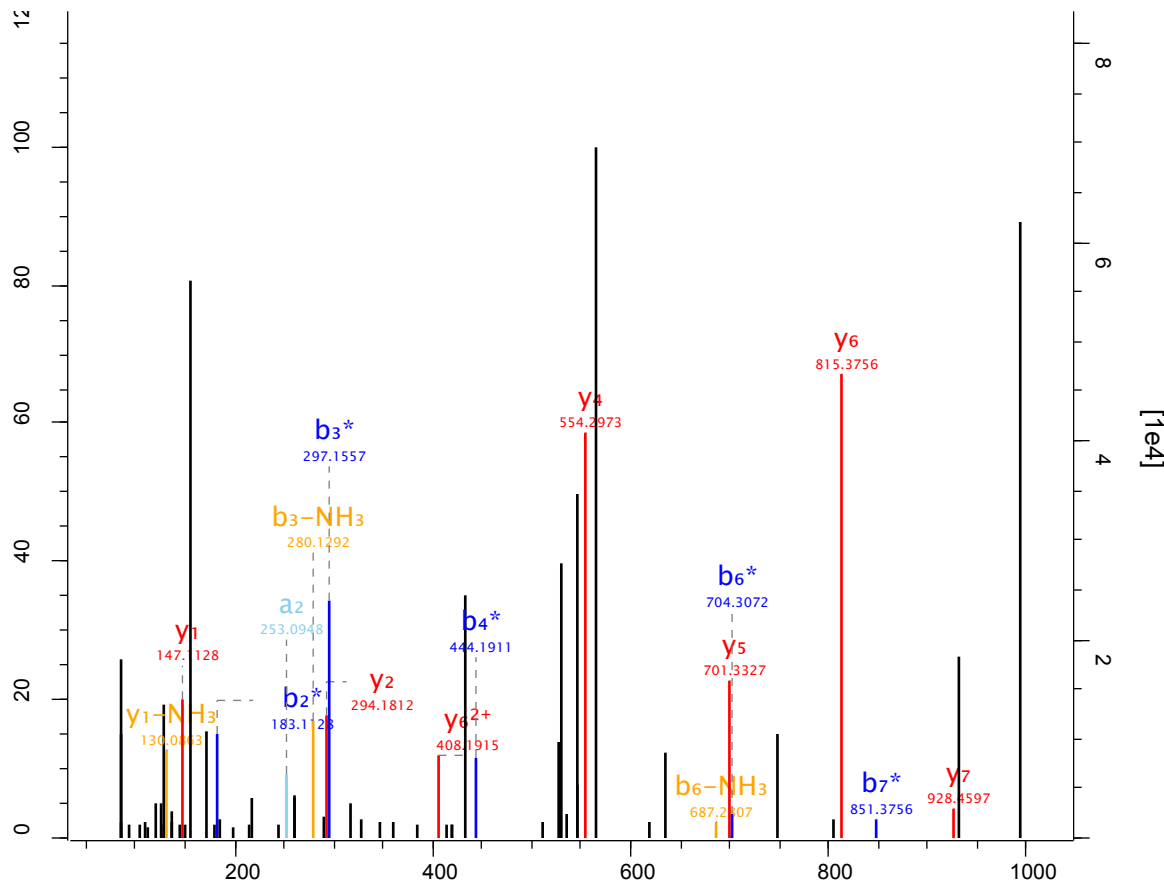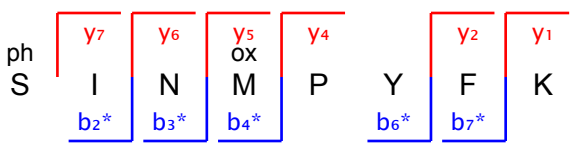

| Raw file                      | Scan  | Method    | Score | m/z    |
|-------------------------------|-------|-----------|-------|--------|
| 2013_COL15_34_38_151128201608 | 13360 | FTMS; HCD | 52.25 | 554.76 |

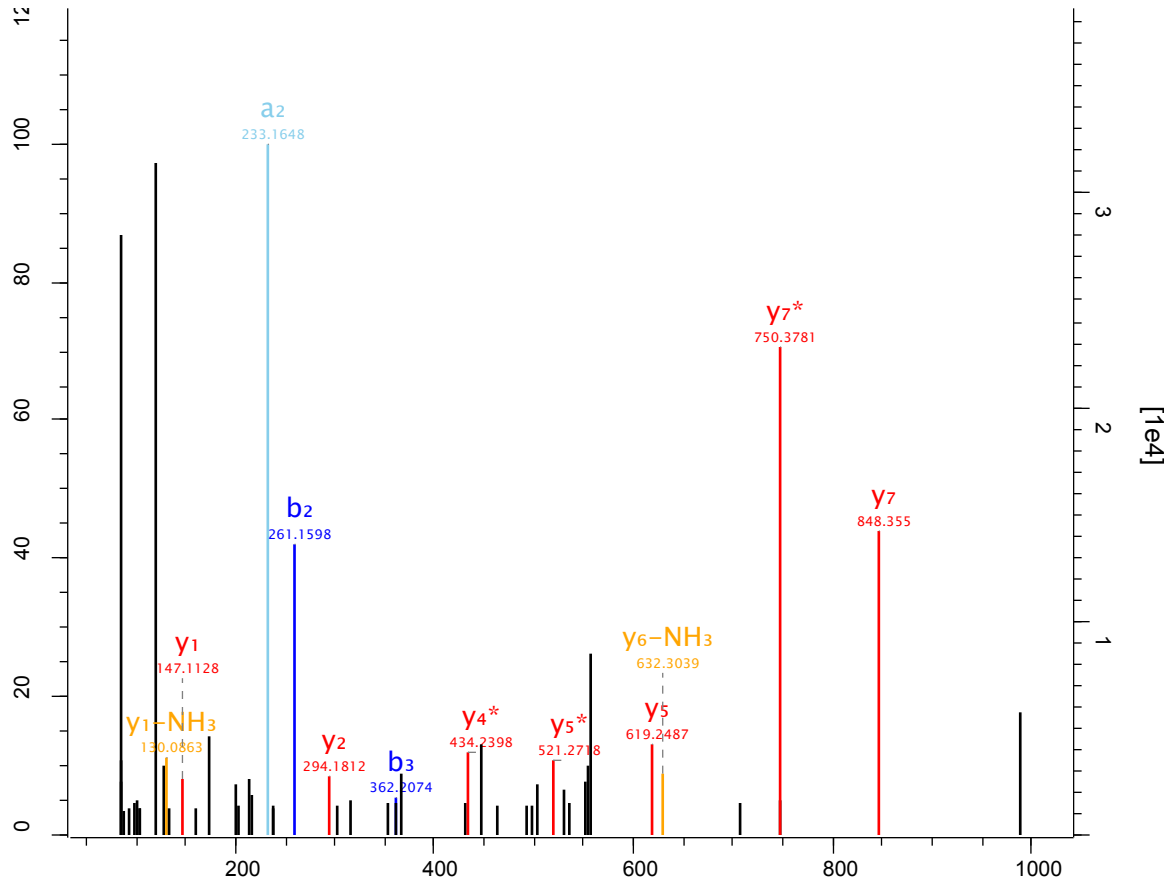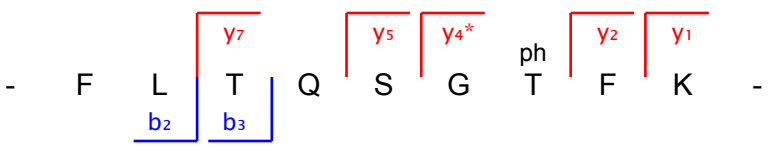

2013\_COL15\_34\_38\_151128201608

13515

FTMS; HCD

64.26

590.26

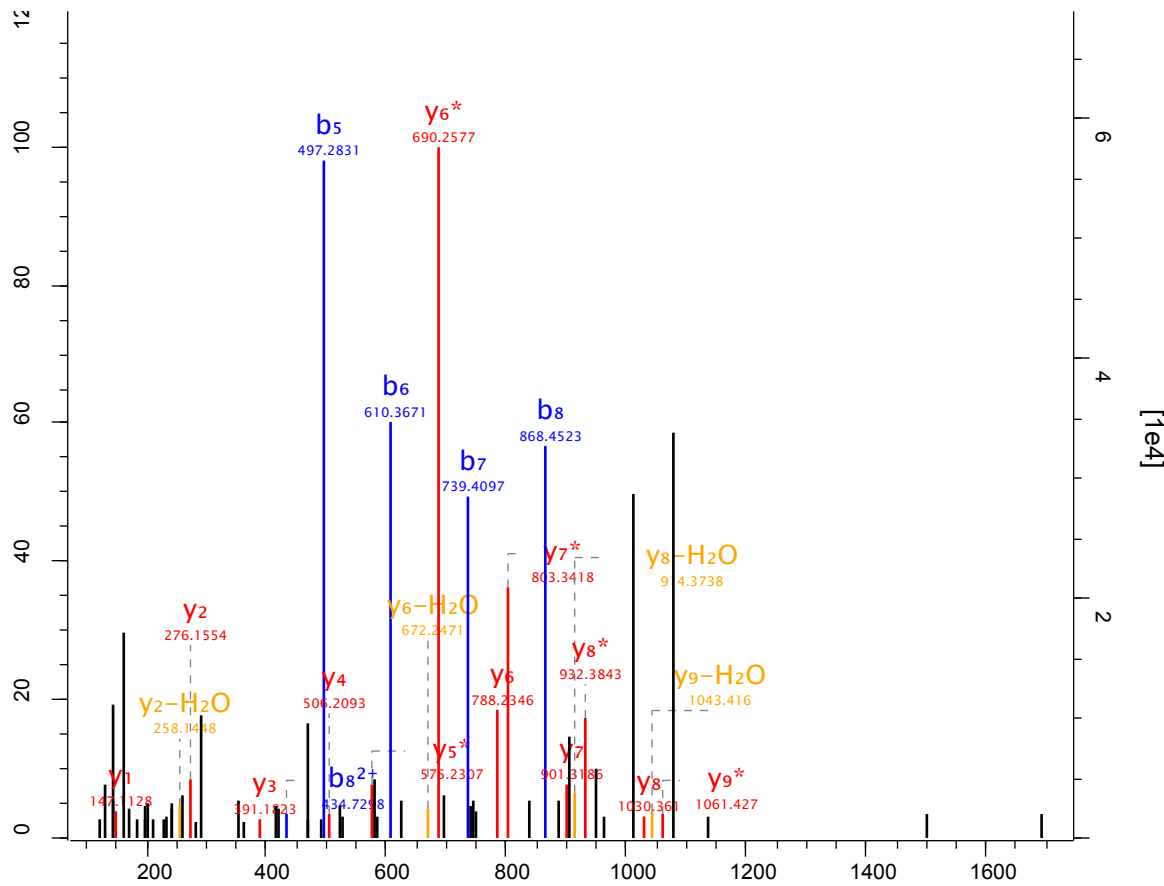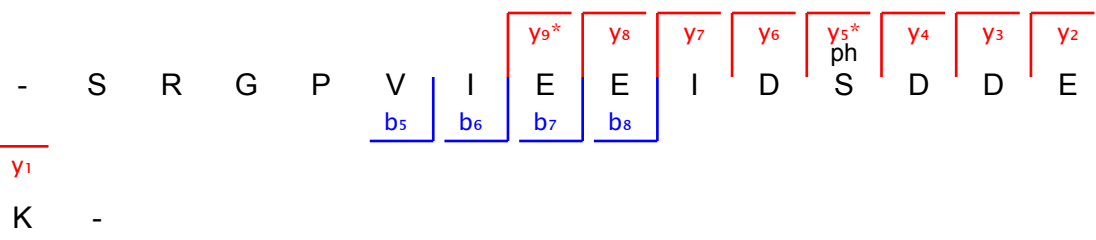

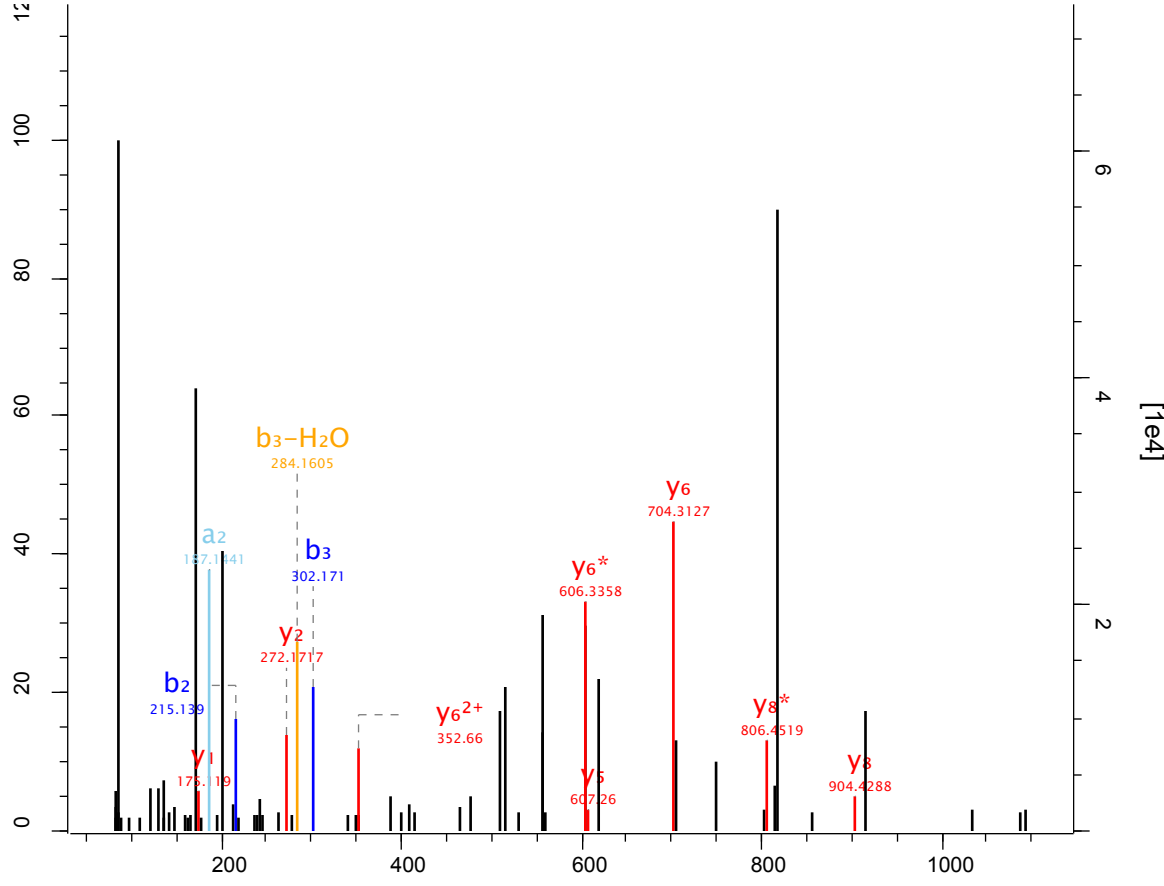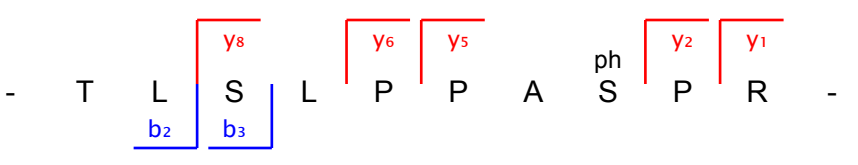



2013\_COL15\_34\_38\_151128201608

13545

FTMS; HCD

55.71

838.4

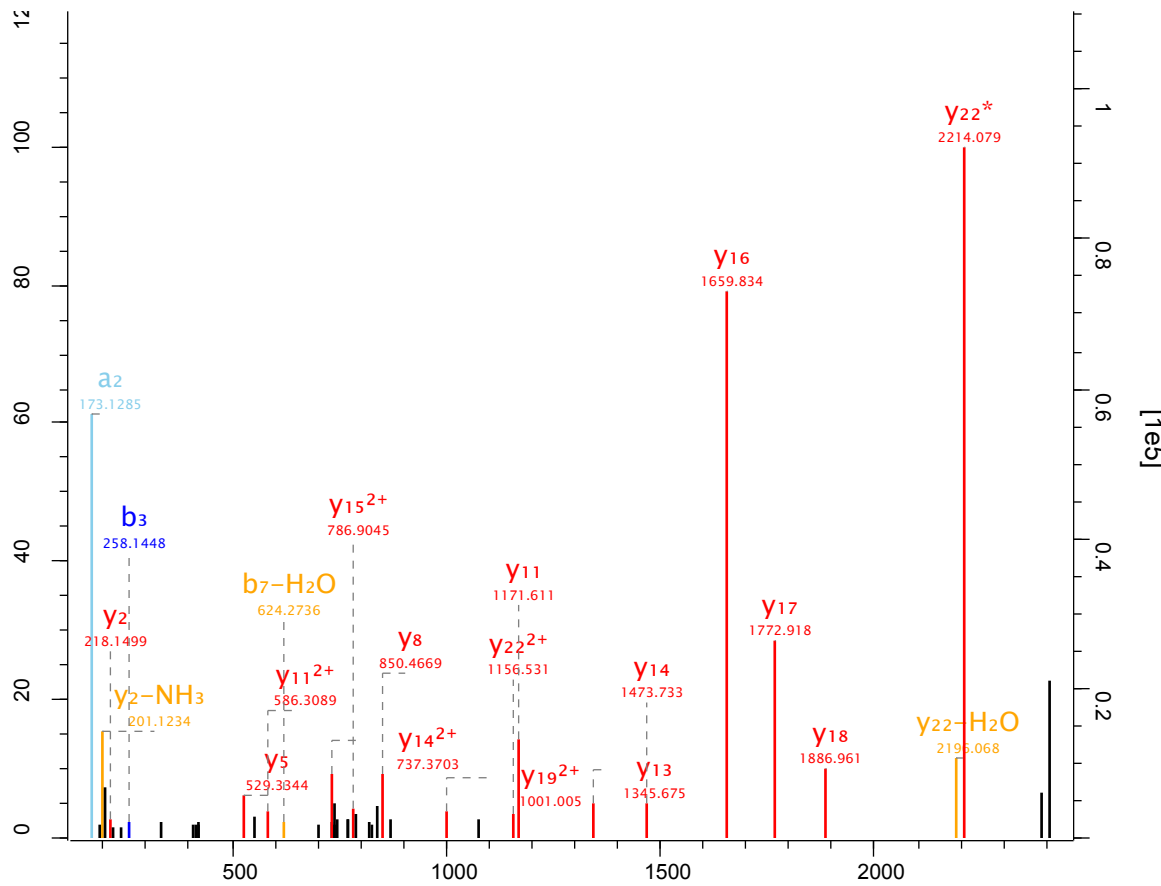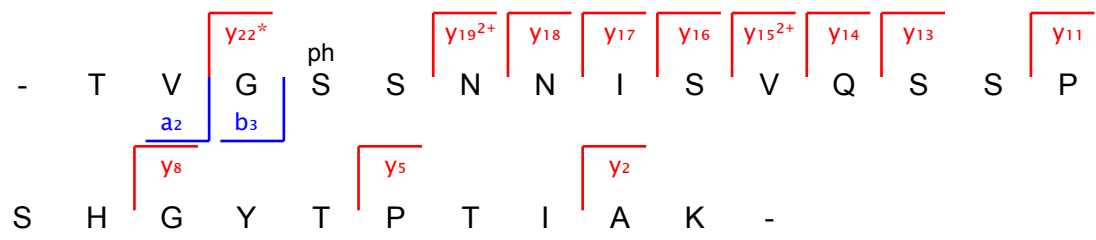

2013\_COL15\_34\_38\_151128201608

13864

FTMS; HCD

52.81

746.27

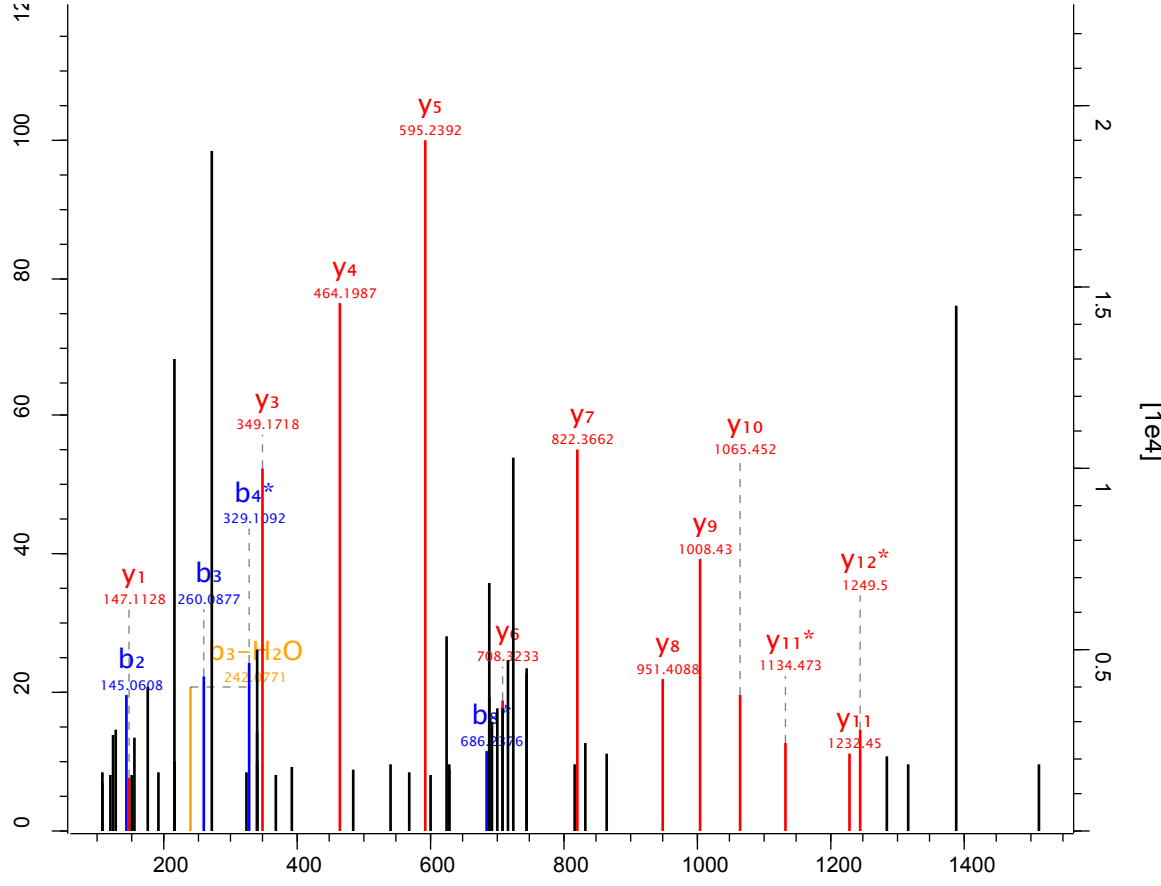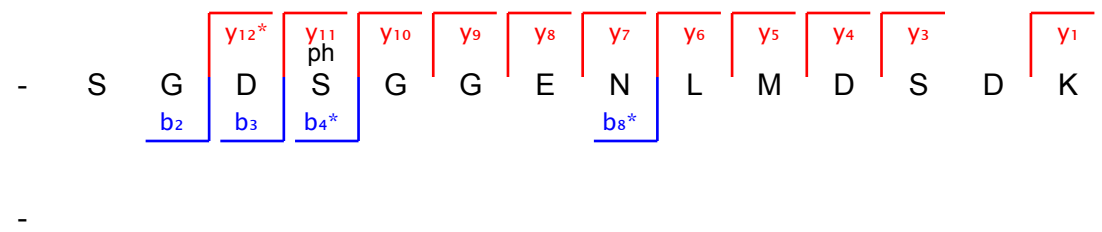

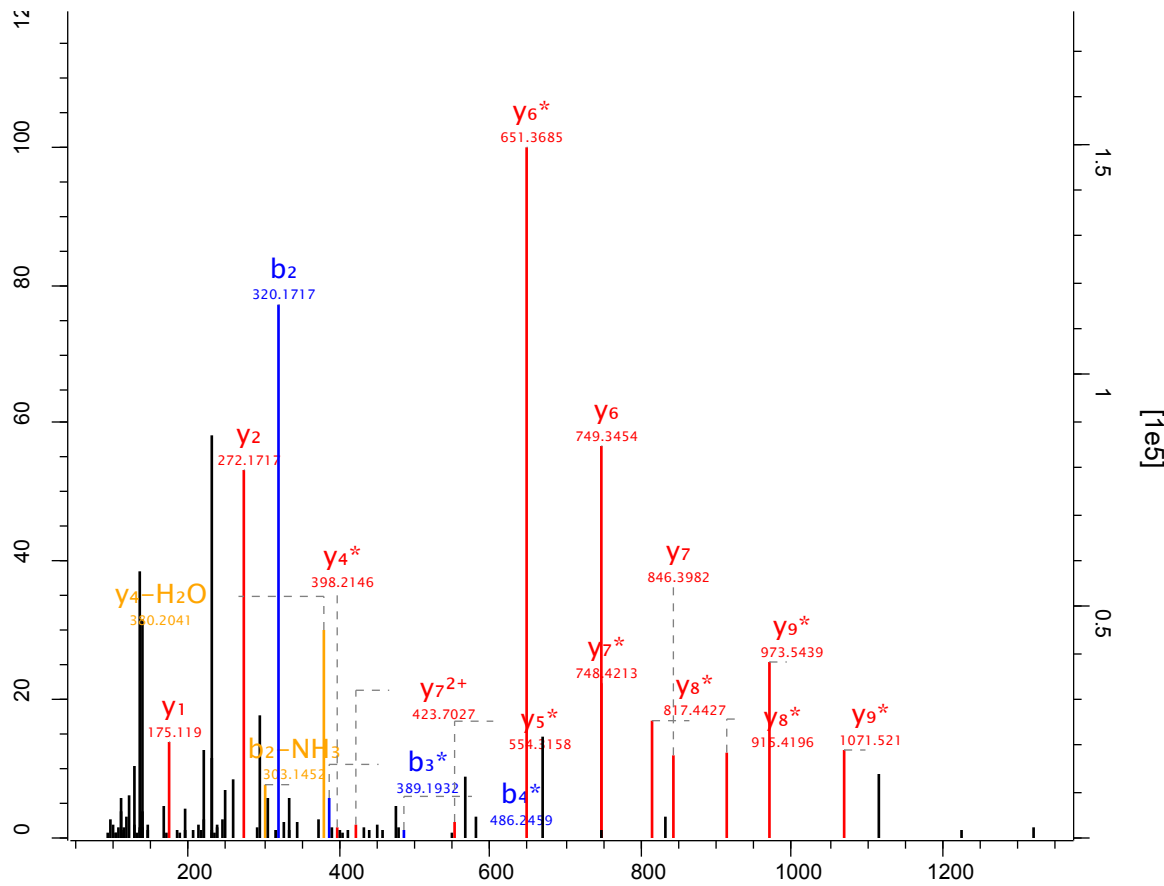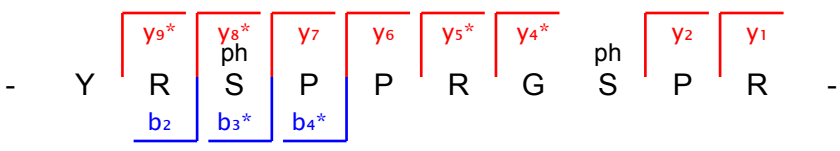

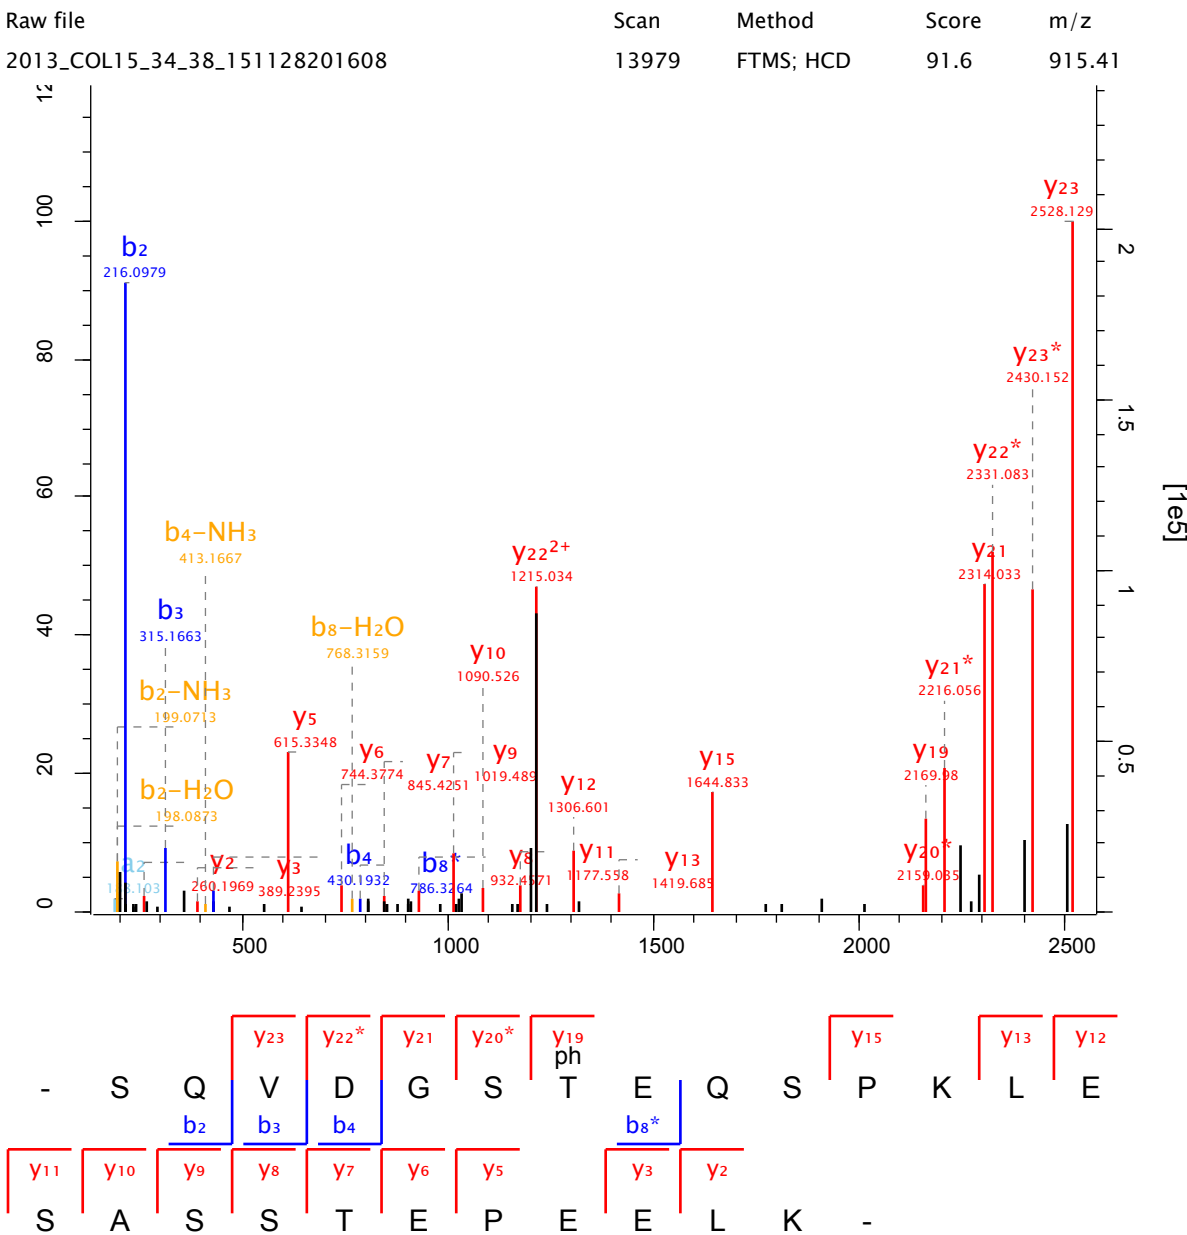

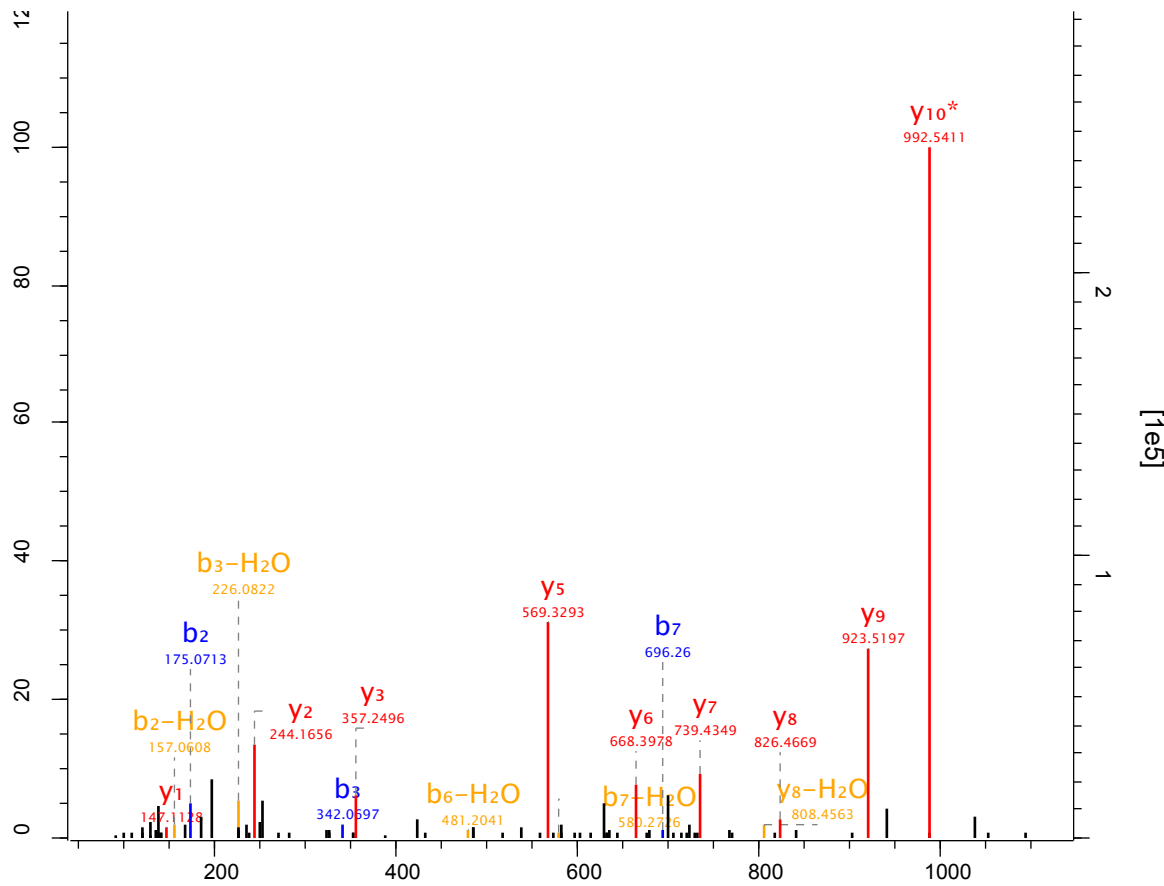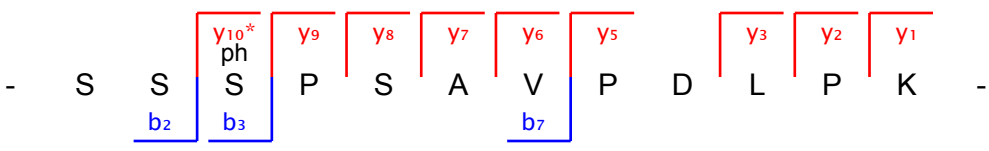

2013\_COL15\_34\_38\_151128201608

1411

FTMS; HCD

150.91

527.89

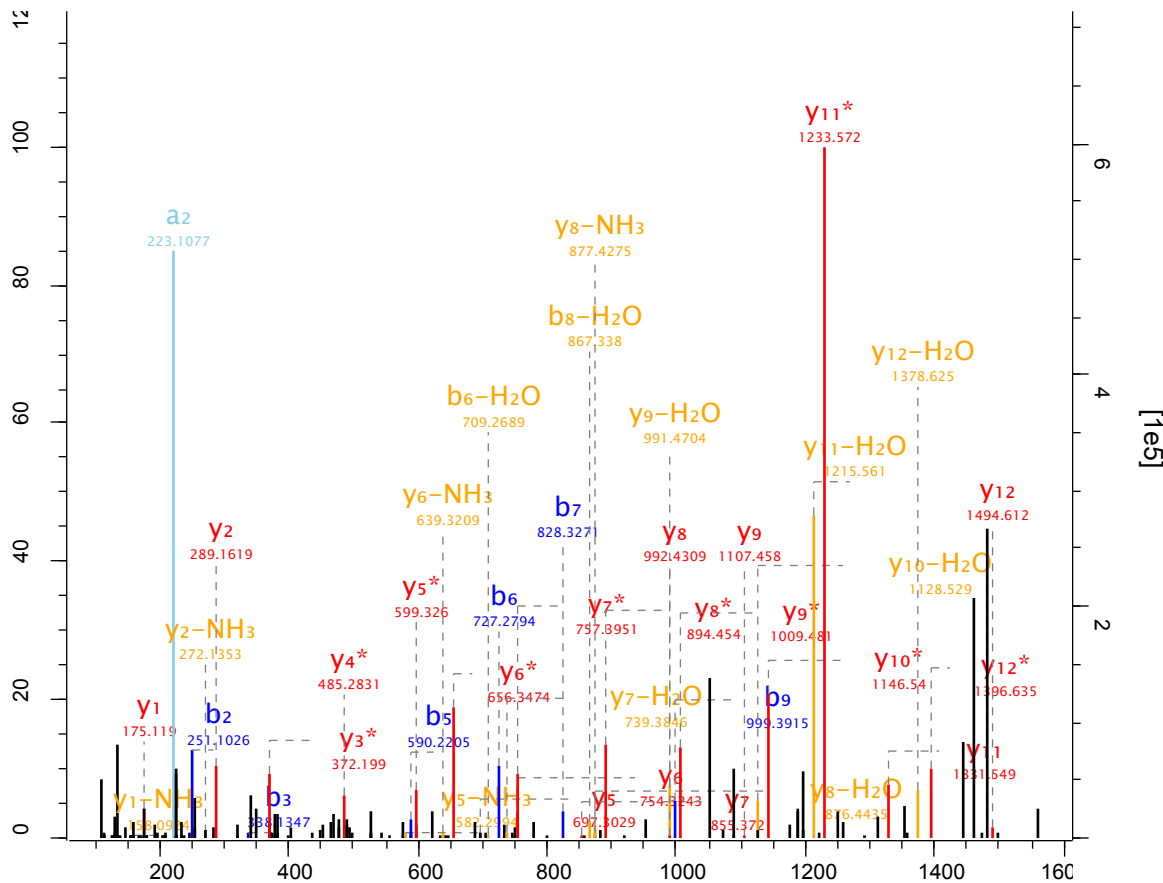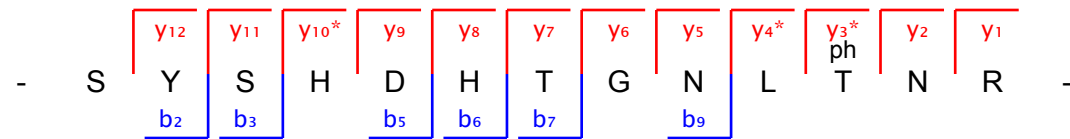

Raw file 2013\_COL15\_34\_38\_151128201608 Scan 14202 Method FTMS; HCD Score 73.29 m/z 655.81

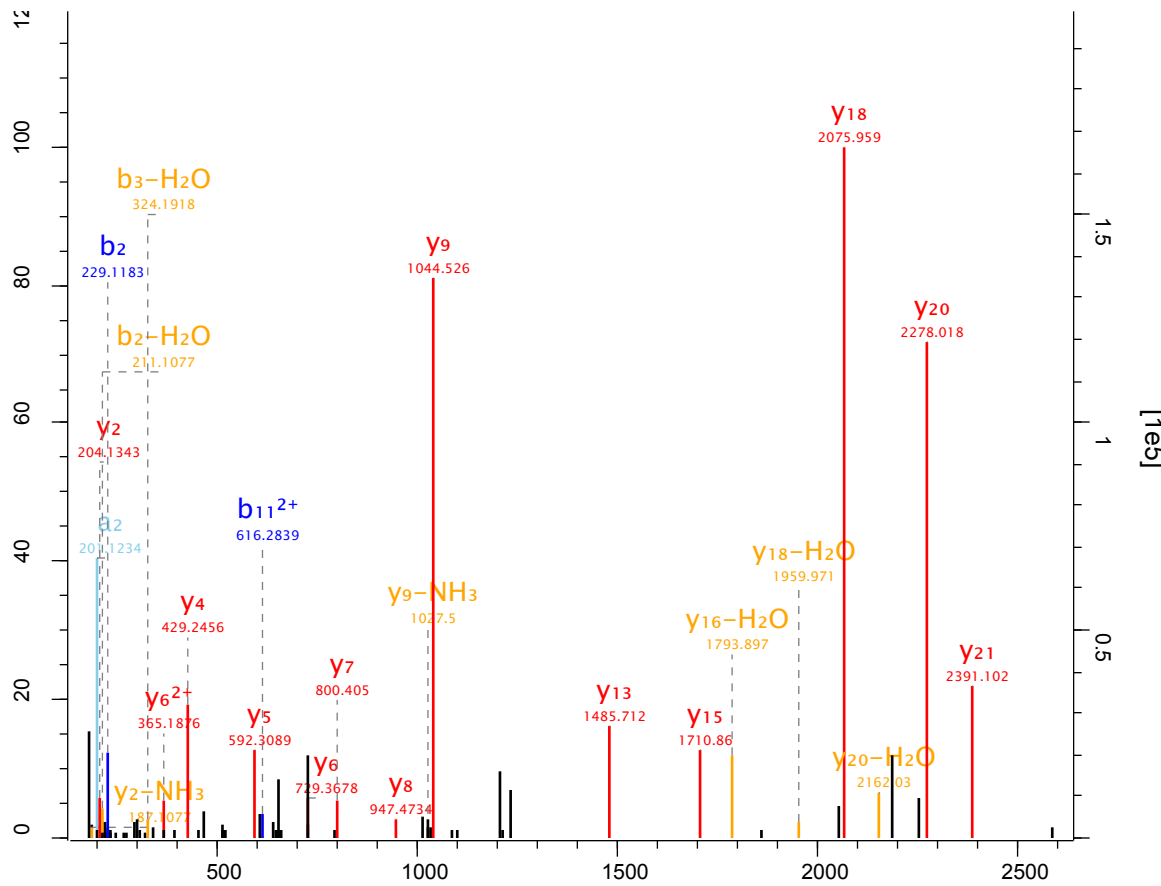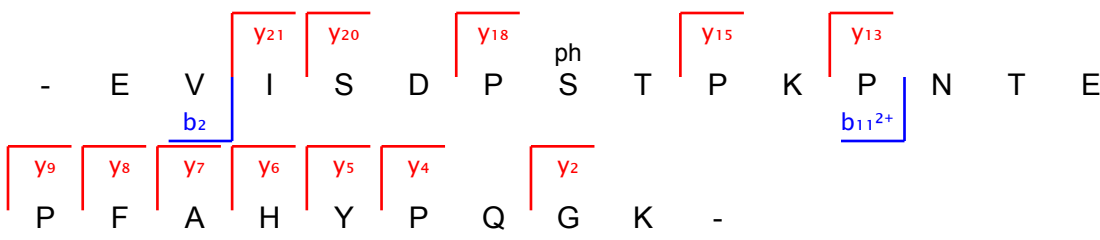

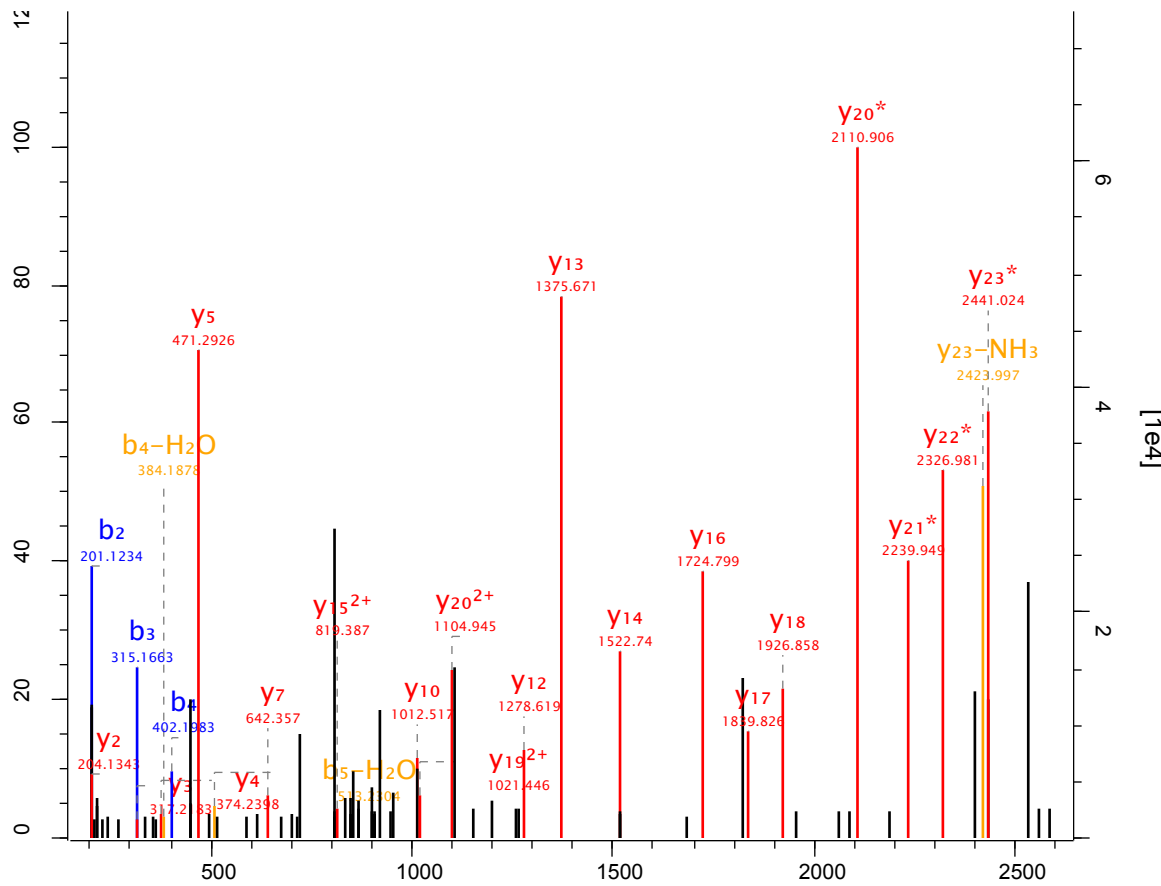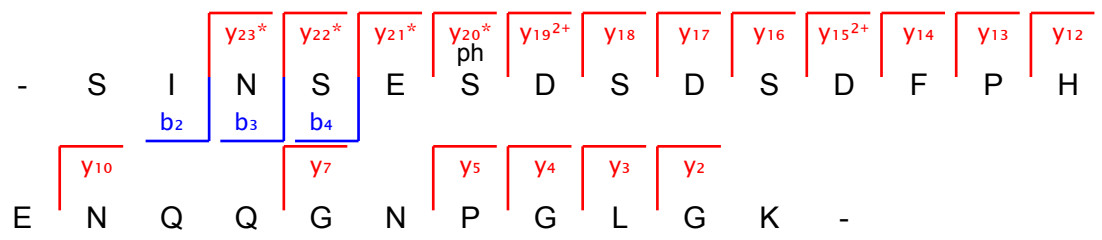



Raw file Scan Method Score m/z

2013\_COL15\_34\_38\_151128201608

14253

FTMS; HCD

64.52

682.28

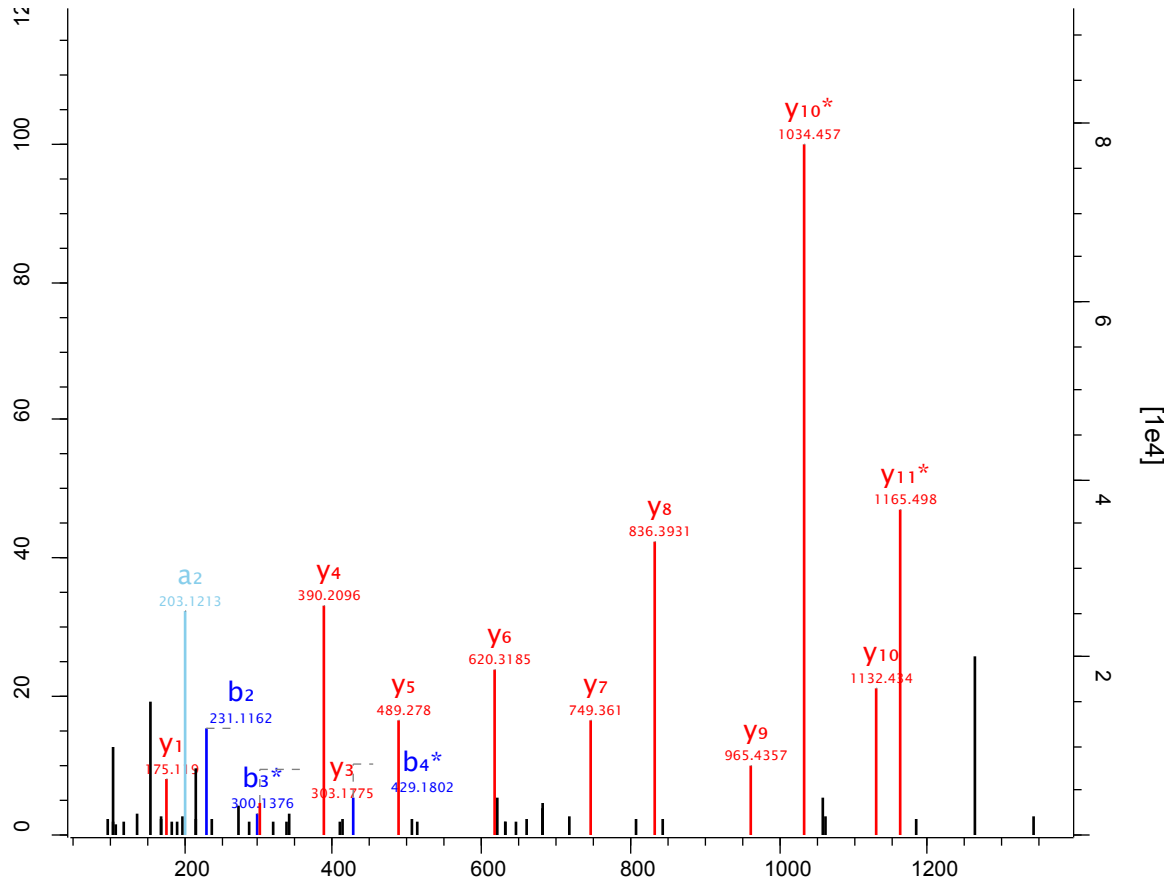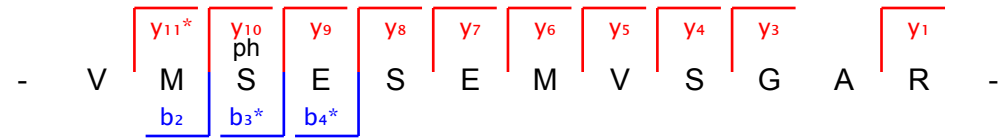

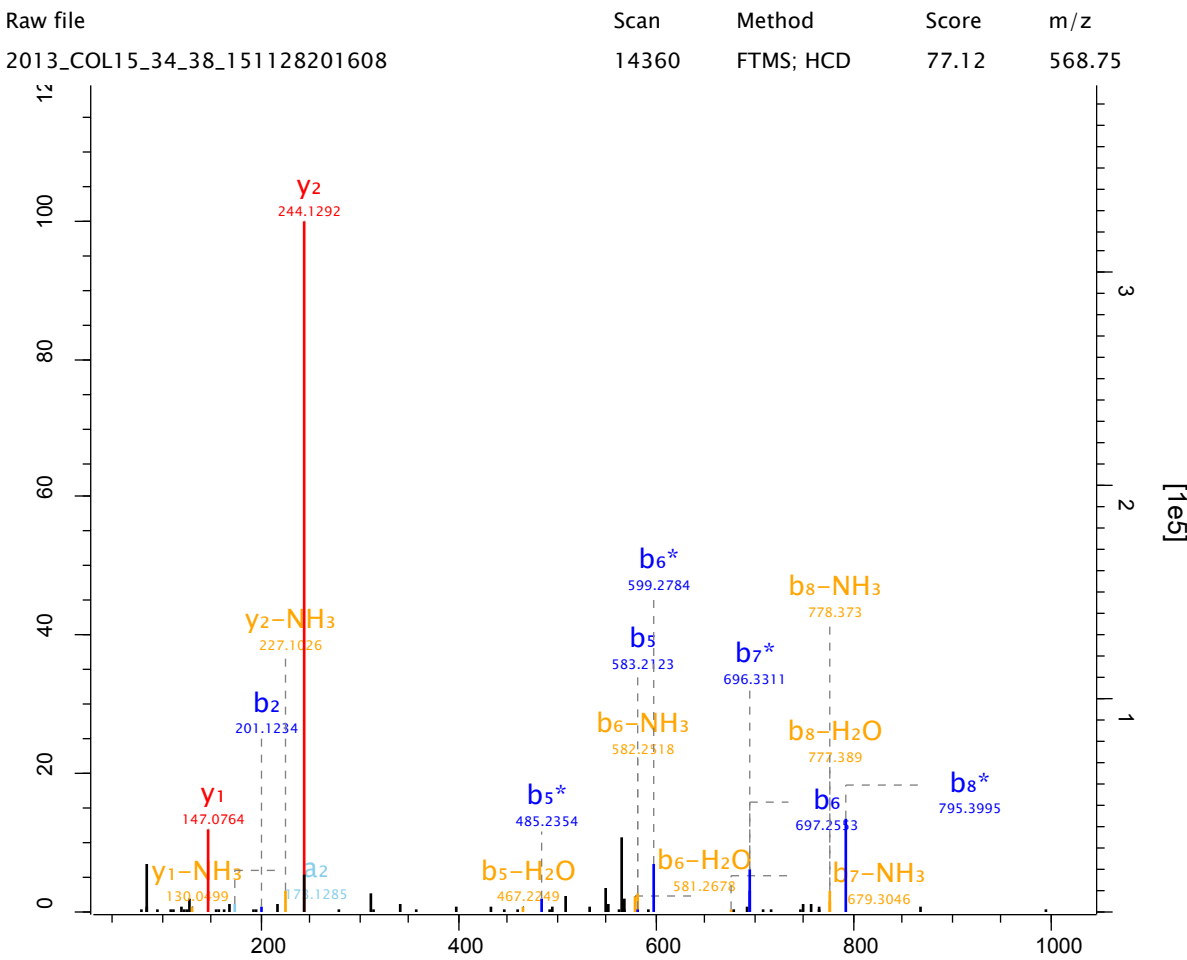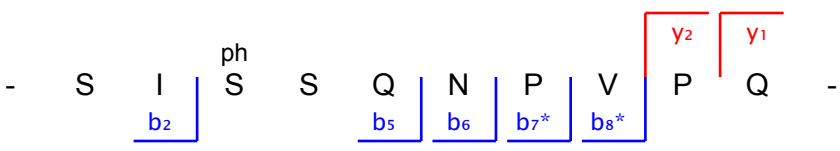

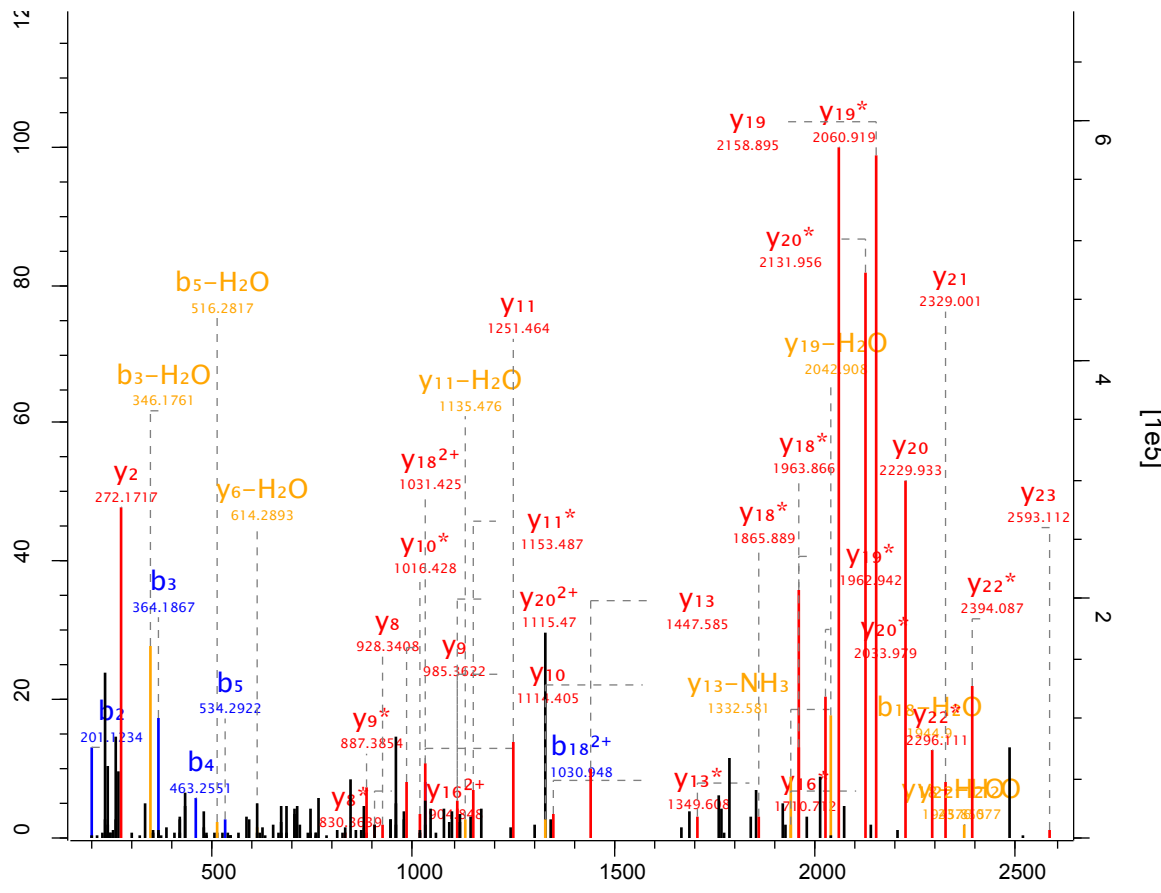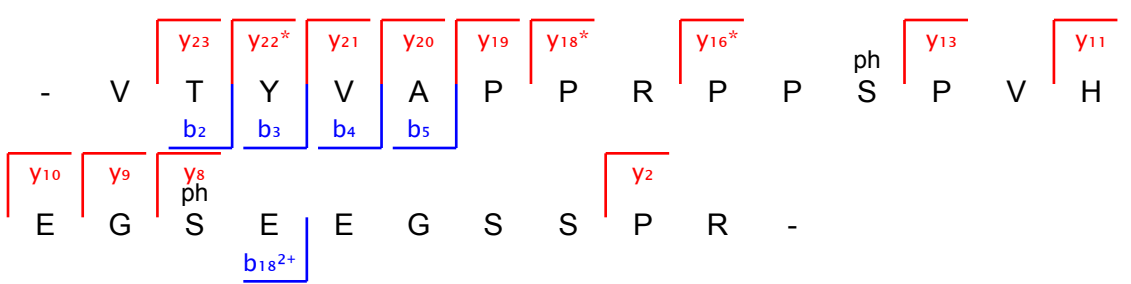

2013\_COL15\_34\_38\_151128201608

14446

FTMS; HCD

140.28

822.34

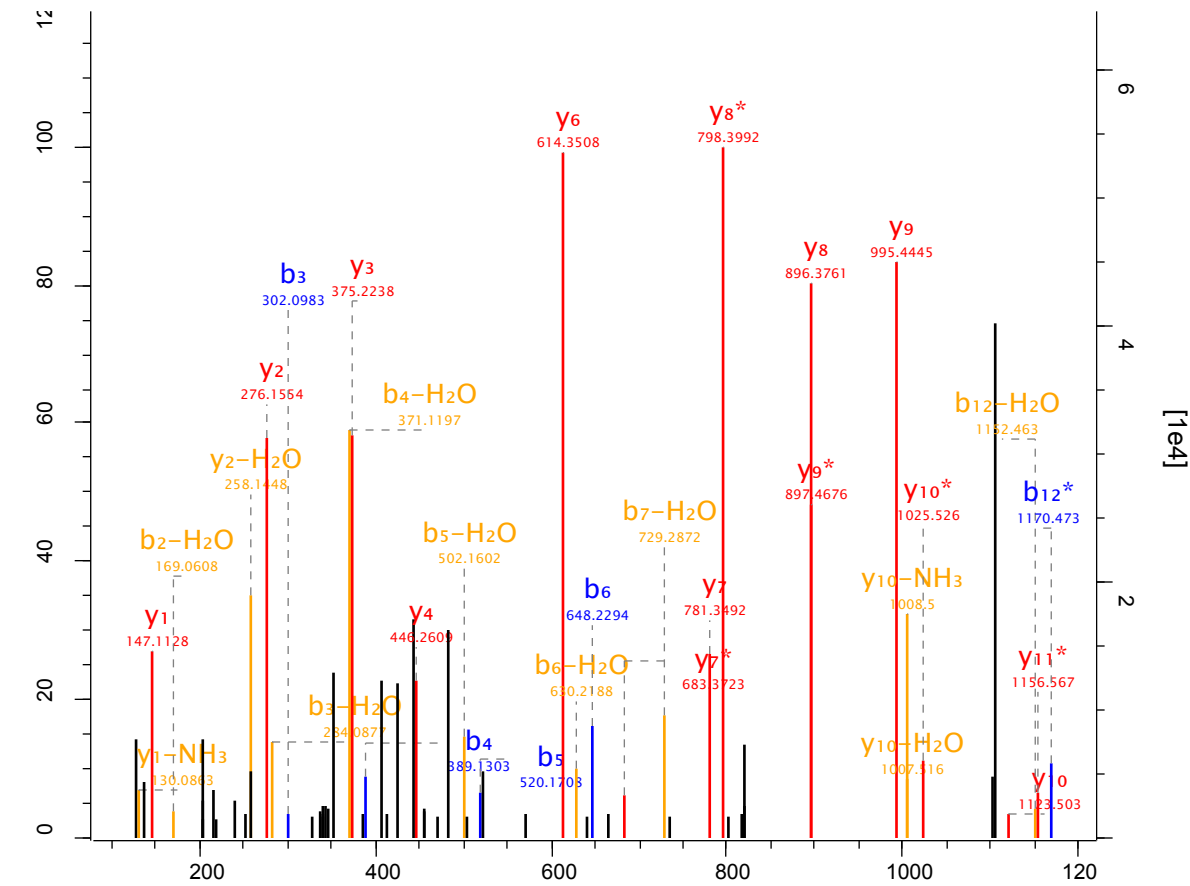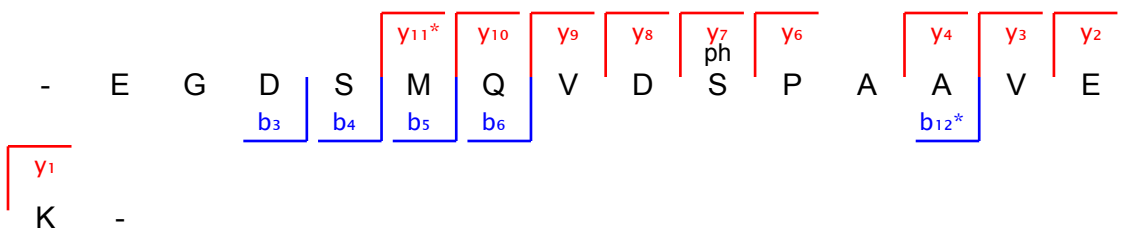

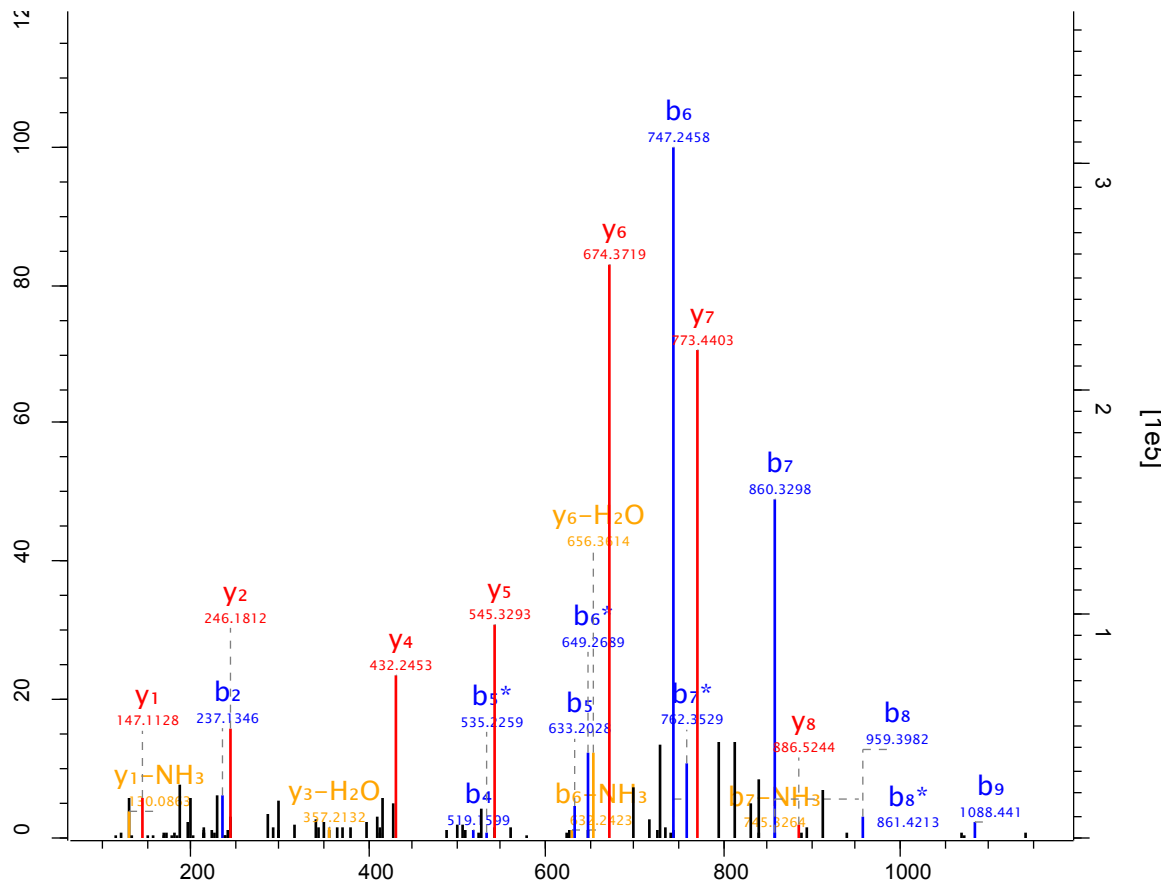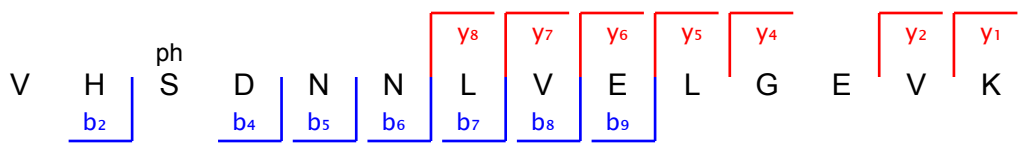

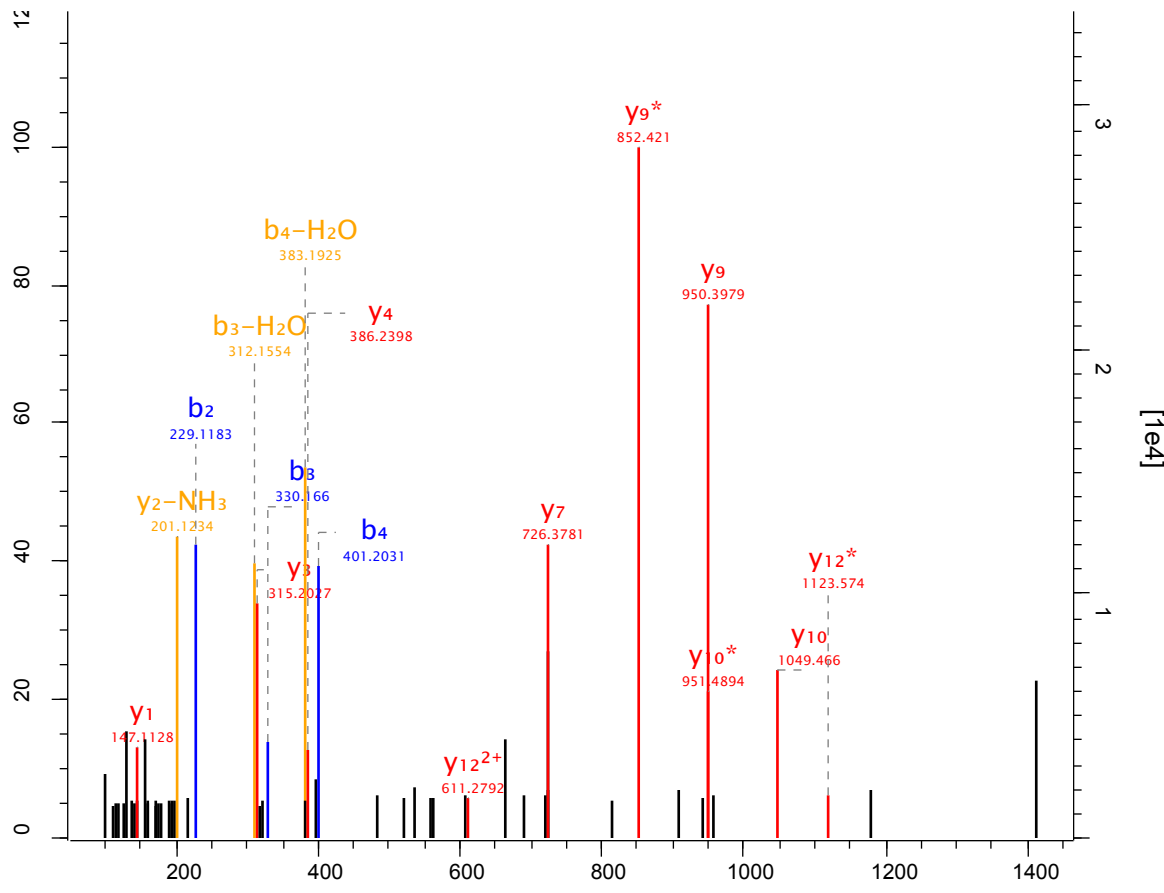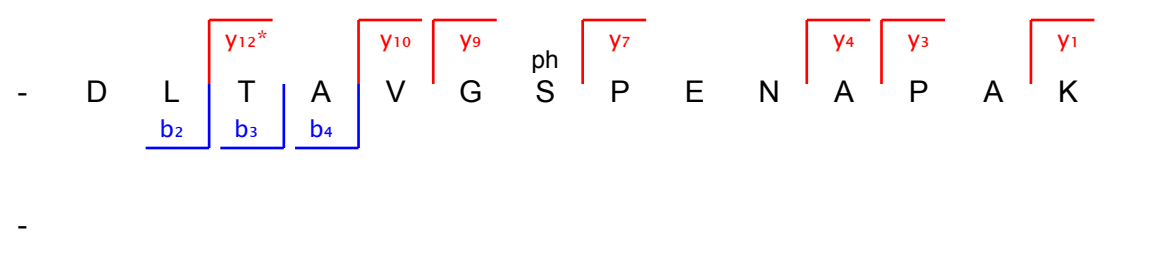

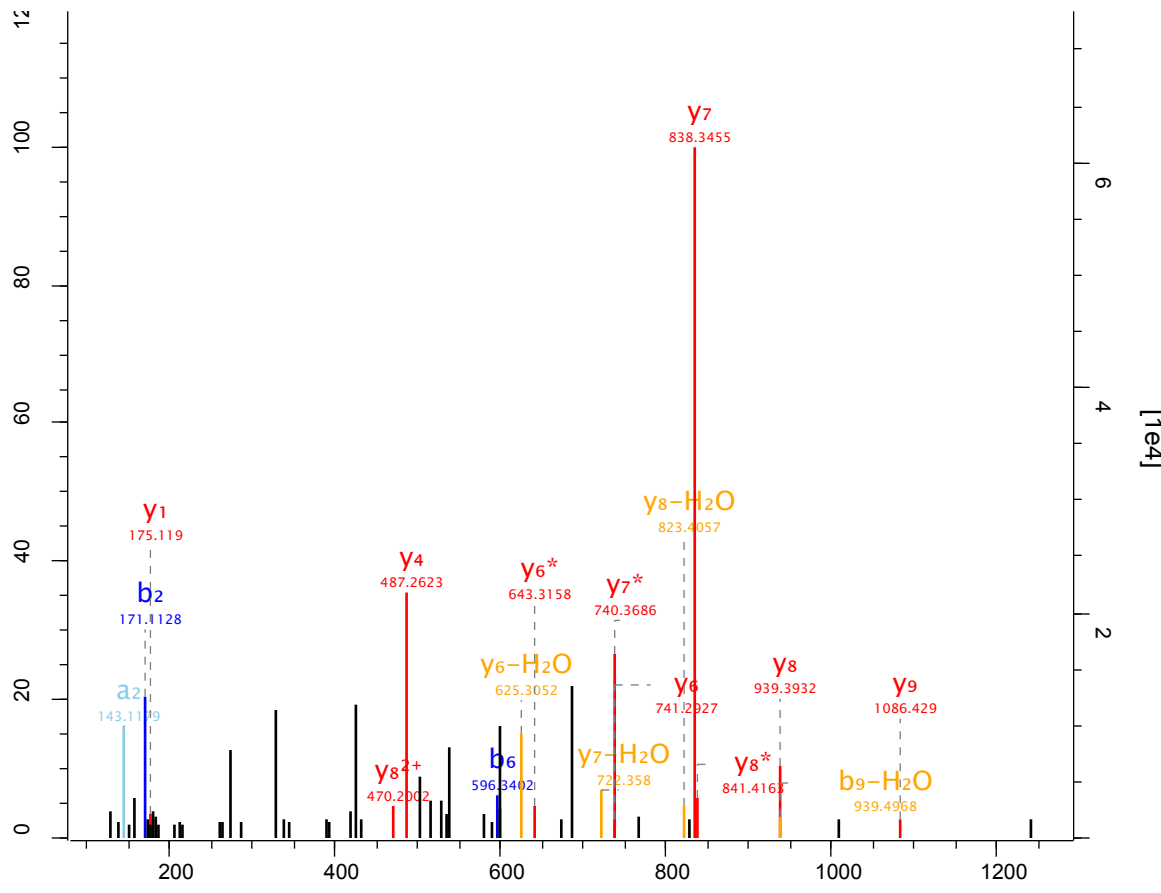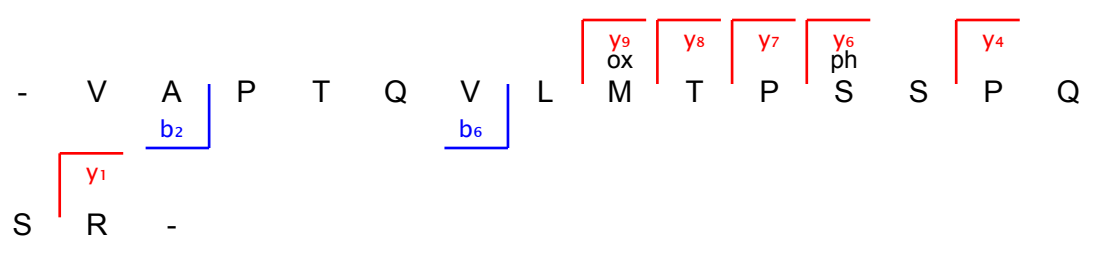

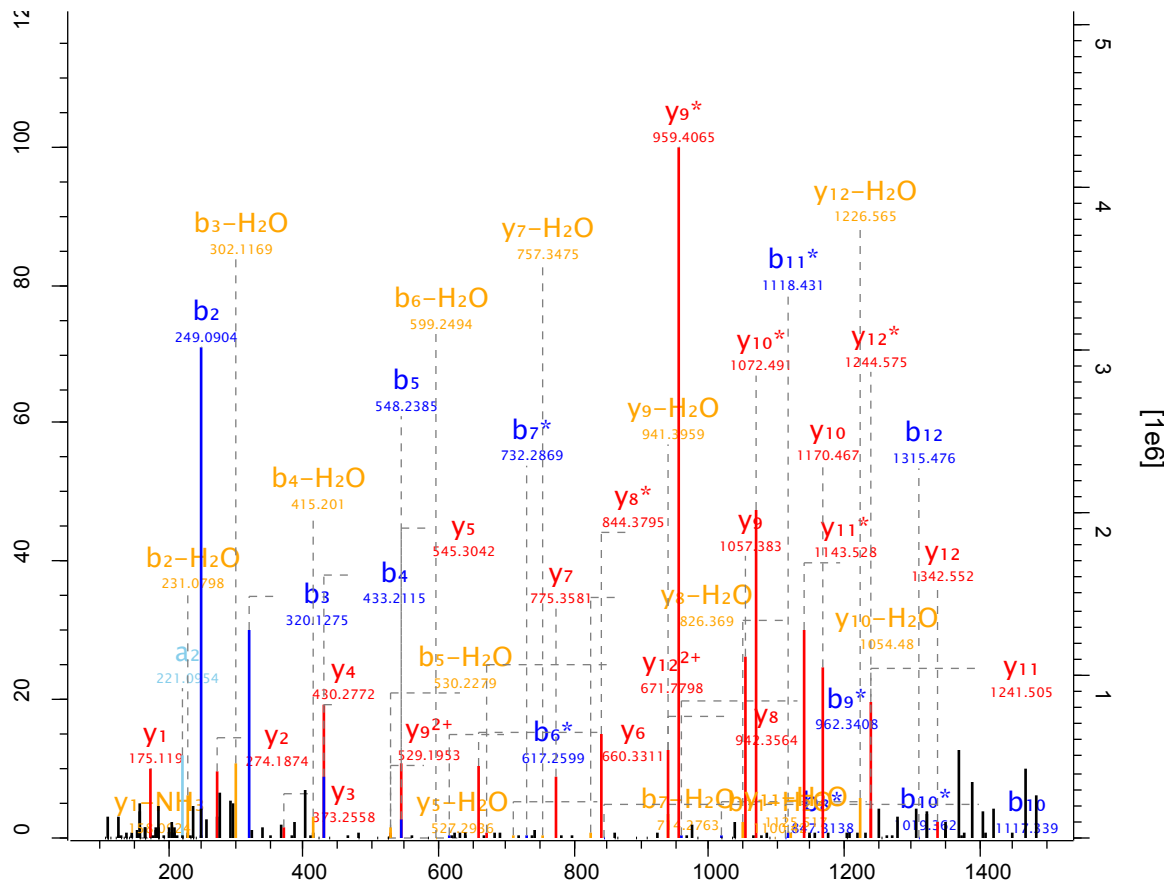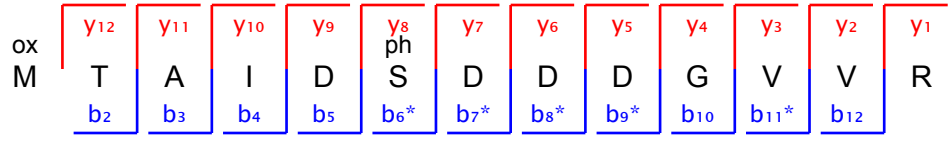



2013\_COL15\_34\_38\_151128201608

14781

FTMS; HCD

75.77

644.65

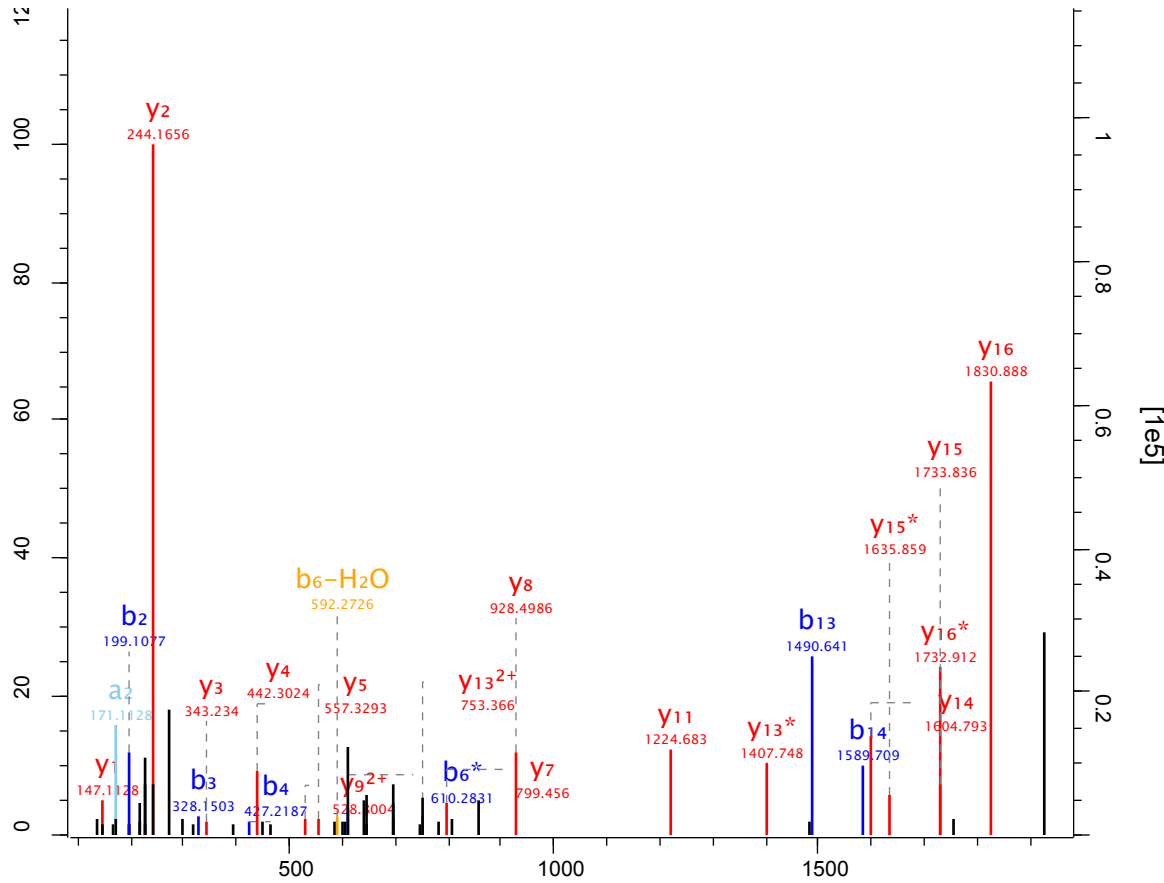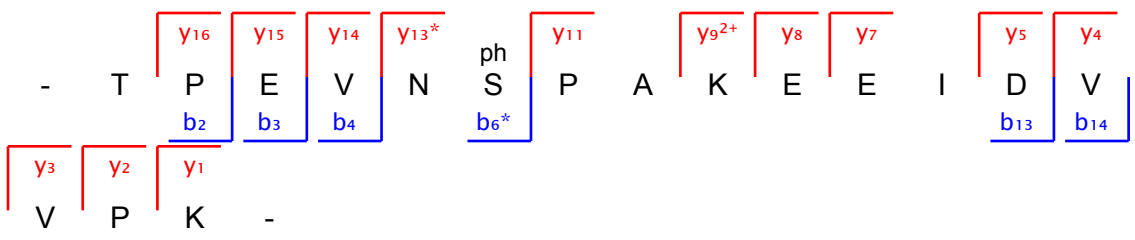

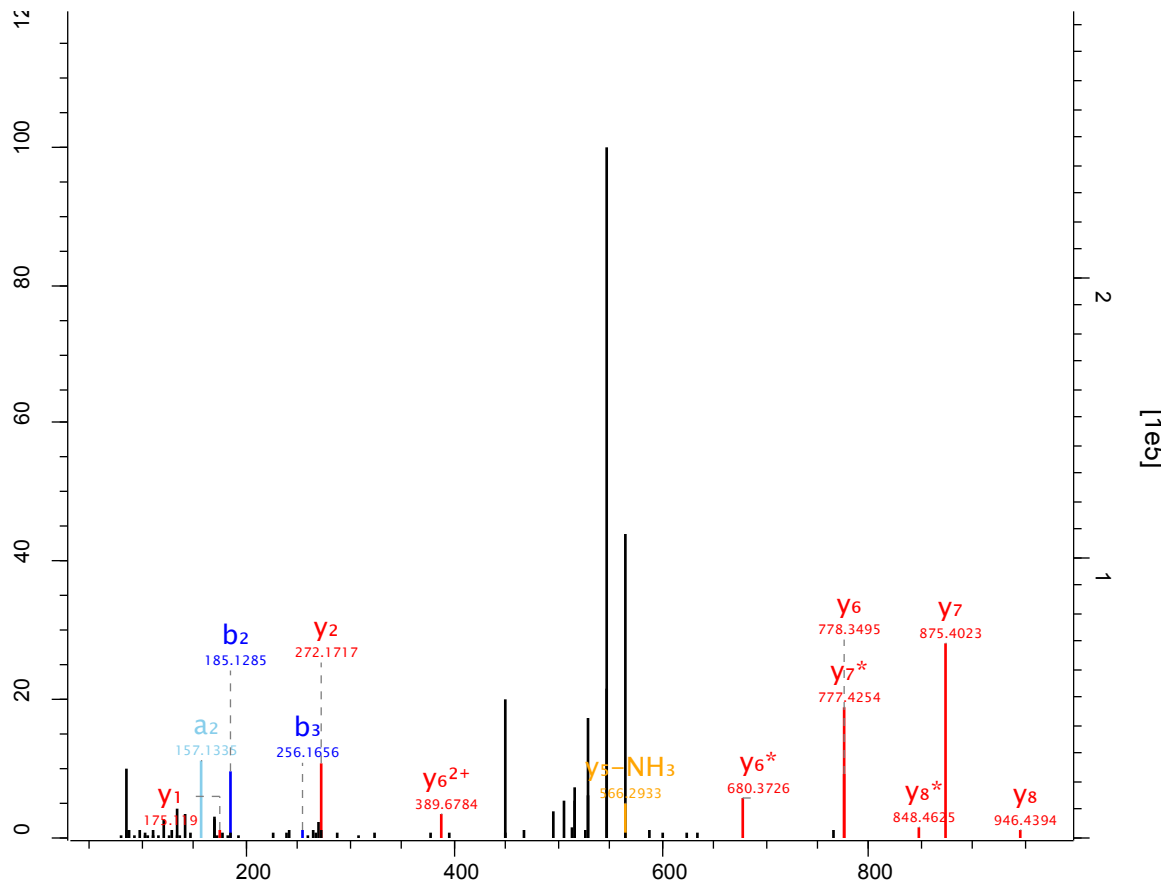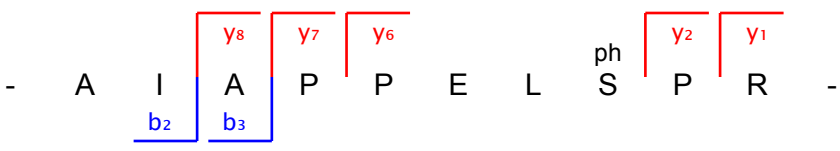

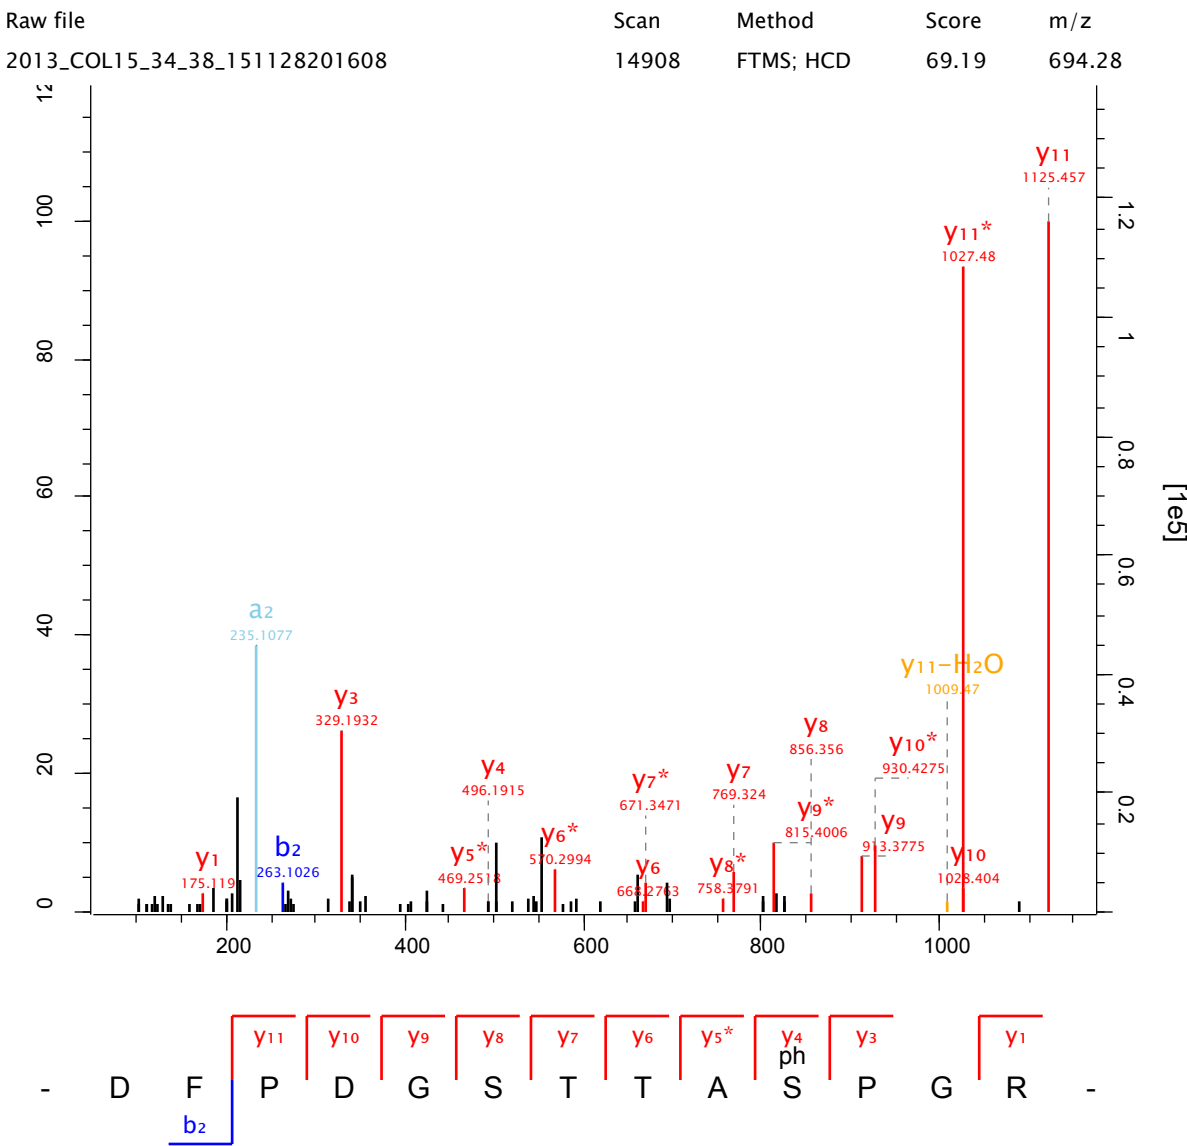

Raw file  
2013\_COL15\_34\_38\_151128201608

Scan 1496 Method FTMS; HCD Score 52.19 m/z 522.9

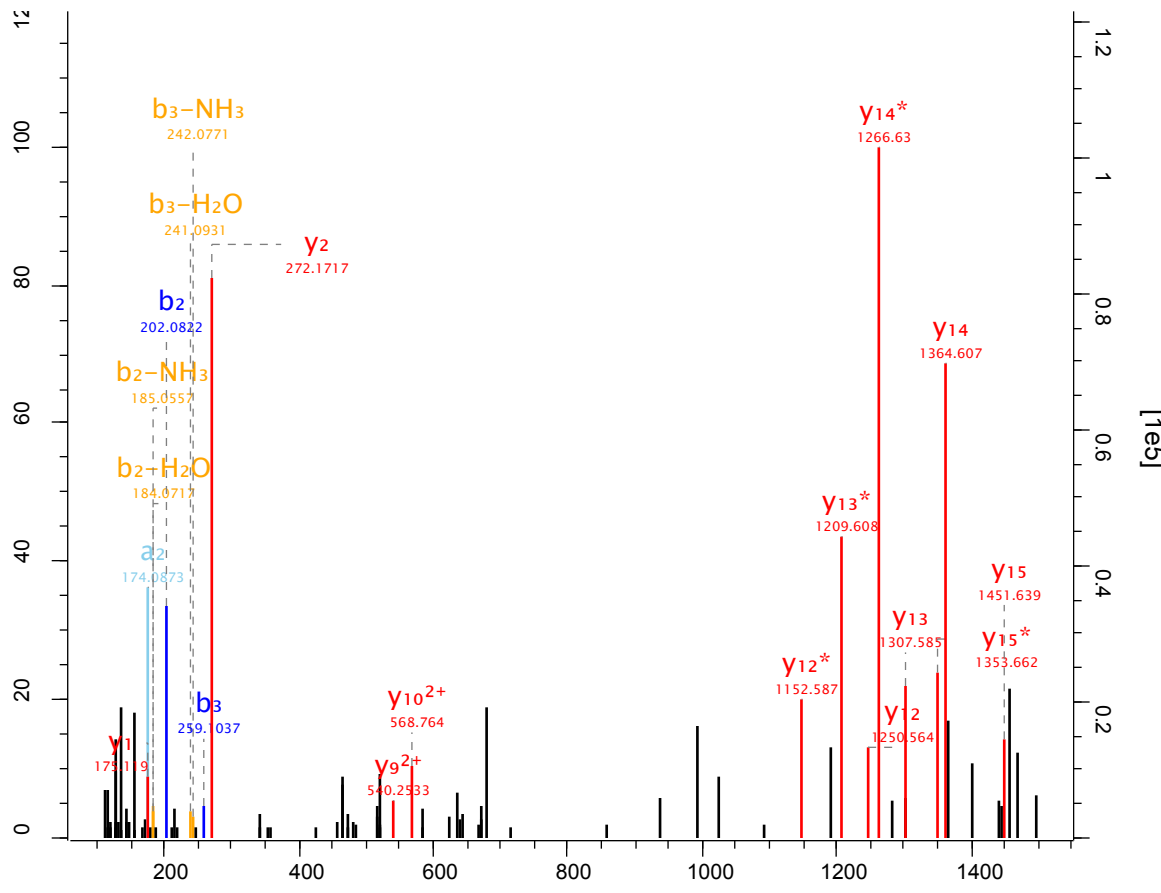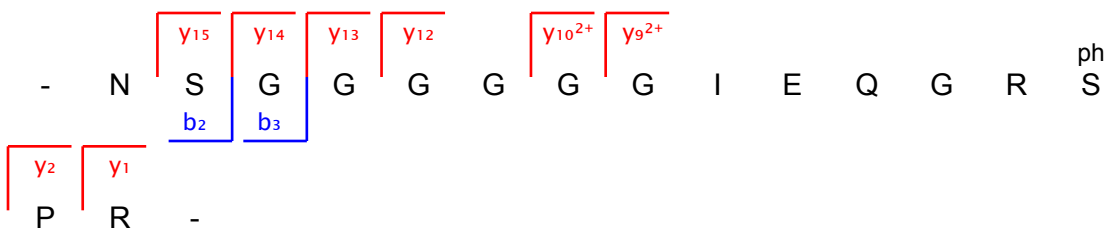

2013\_COL15\_34\_38\_151128201608

14994

FTMS; HCD

121.45

632.28

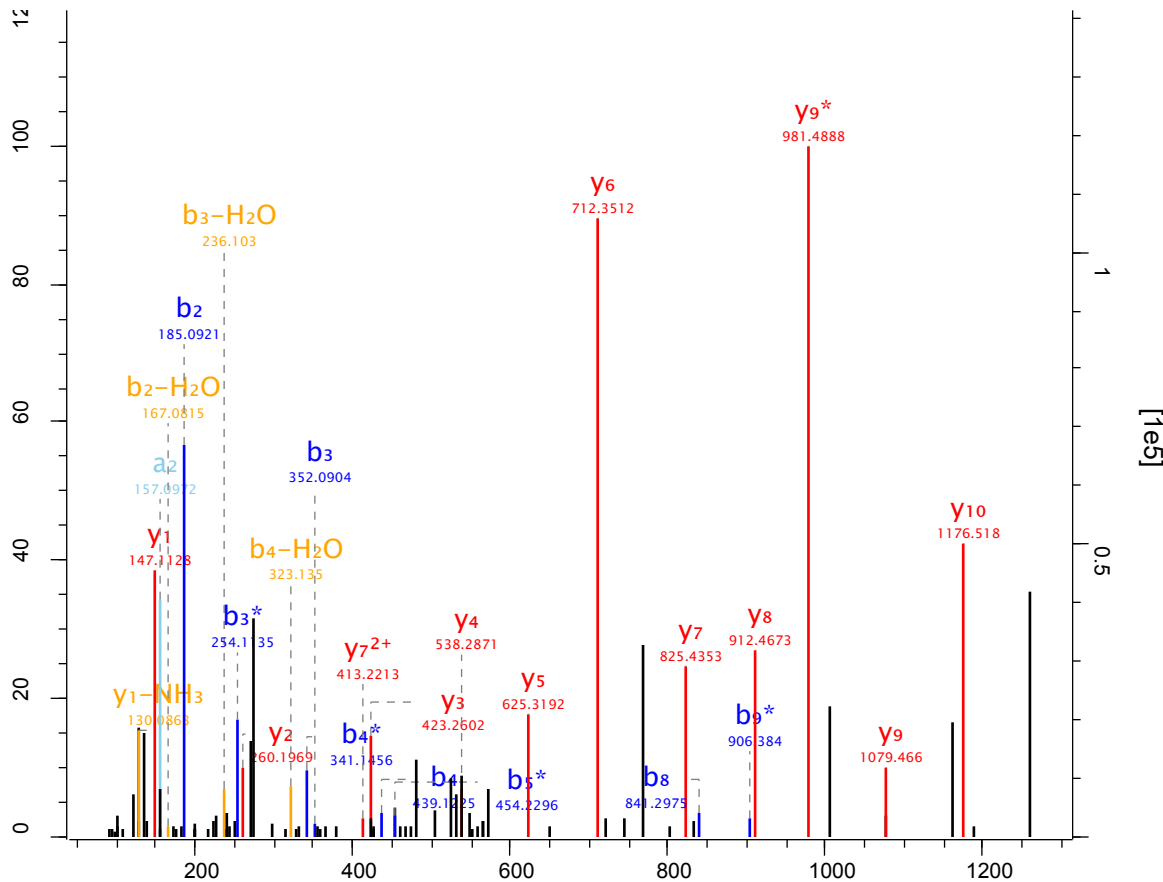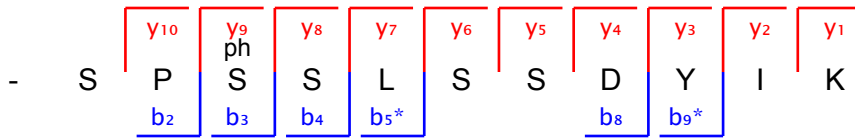

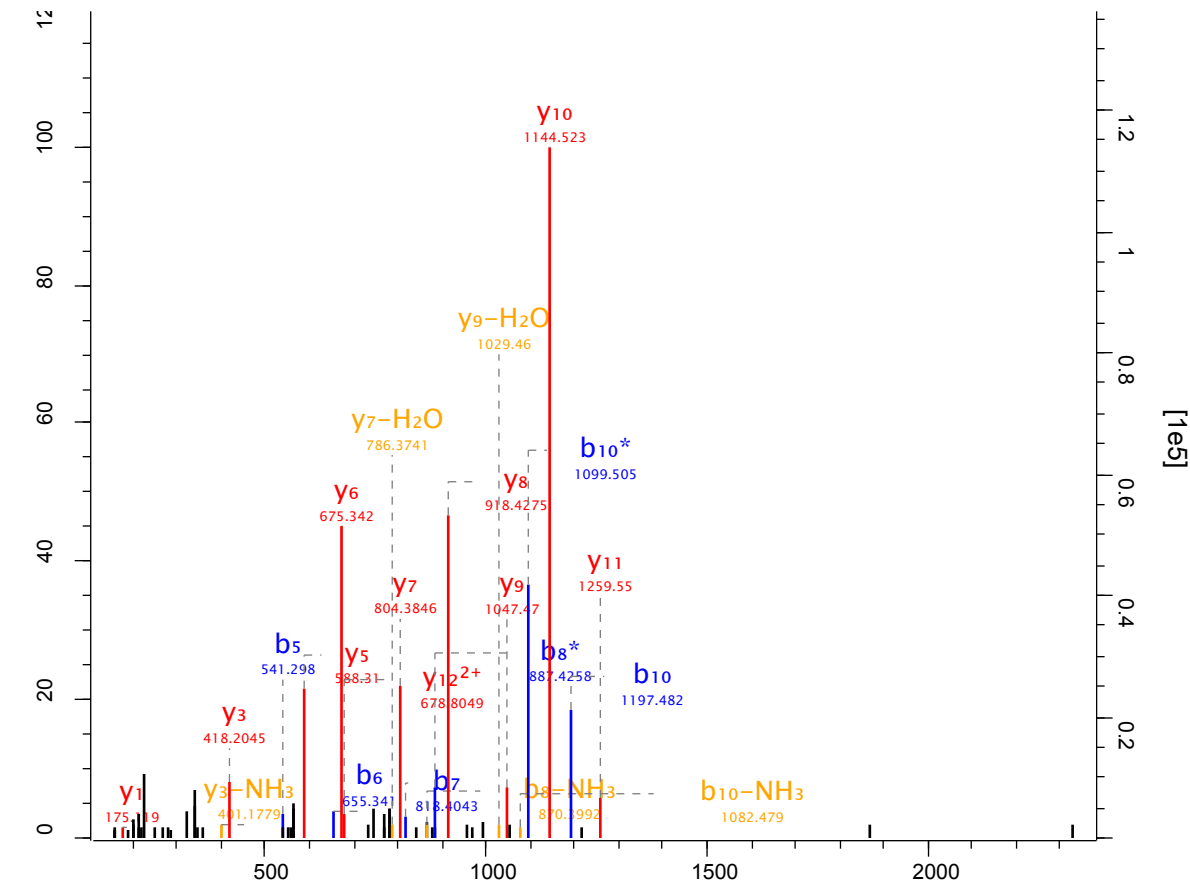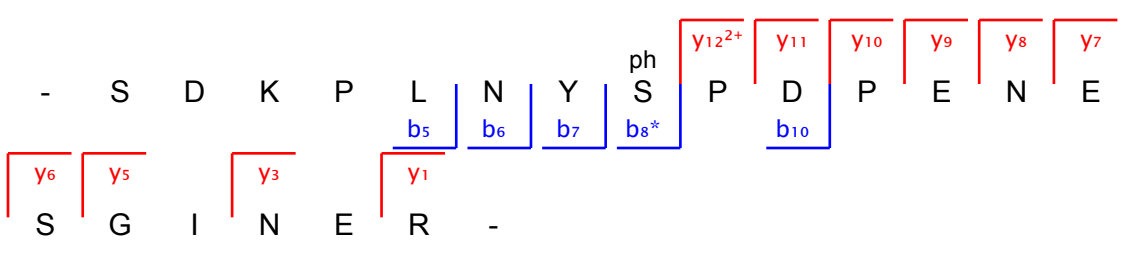

2013\_COL15\_34\_38\_151128201608

15145

FTMS; HCD

132.23

594.77

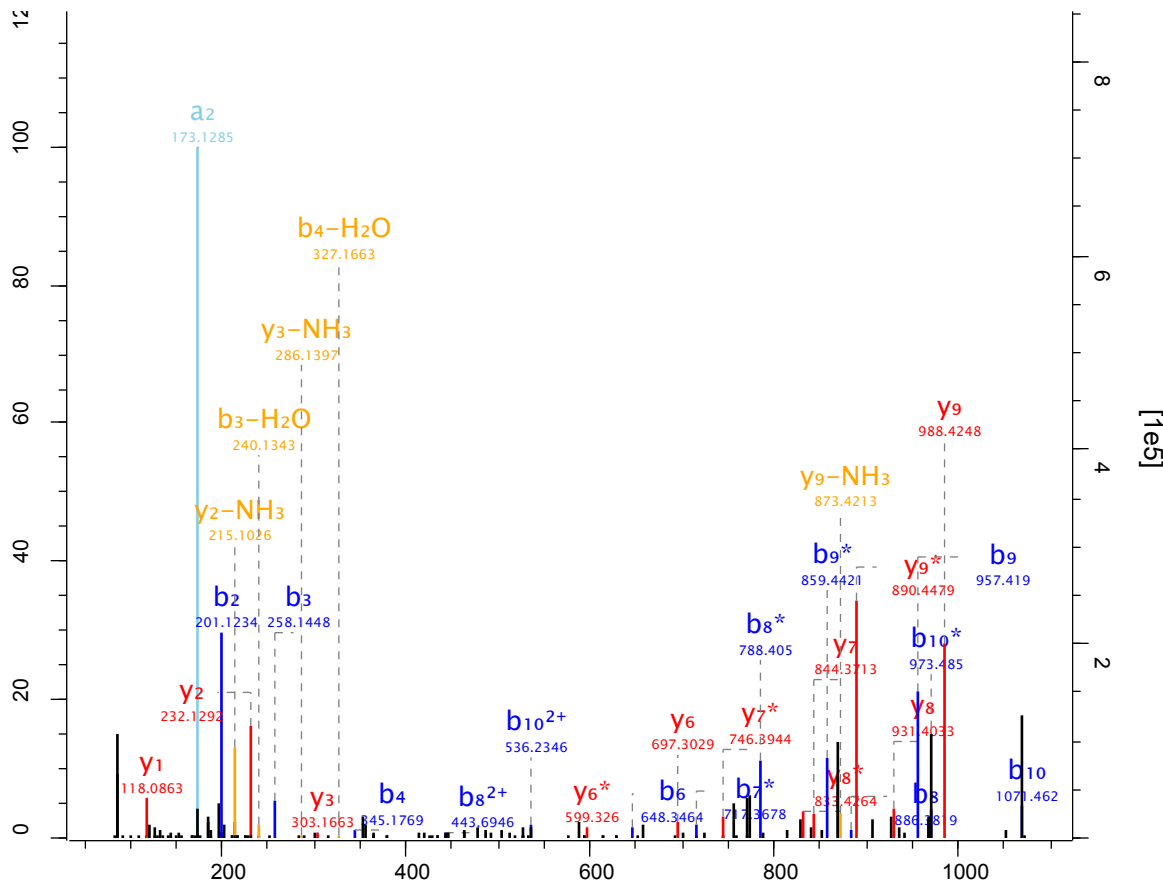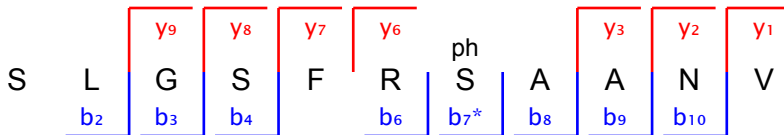

Raw file Scan Method Score m/z  
 2013\_COL15\_34\_38\_151128201608 15165 FTMS; HCD 104.88 642.3

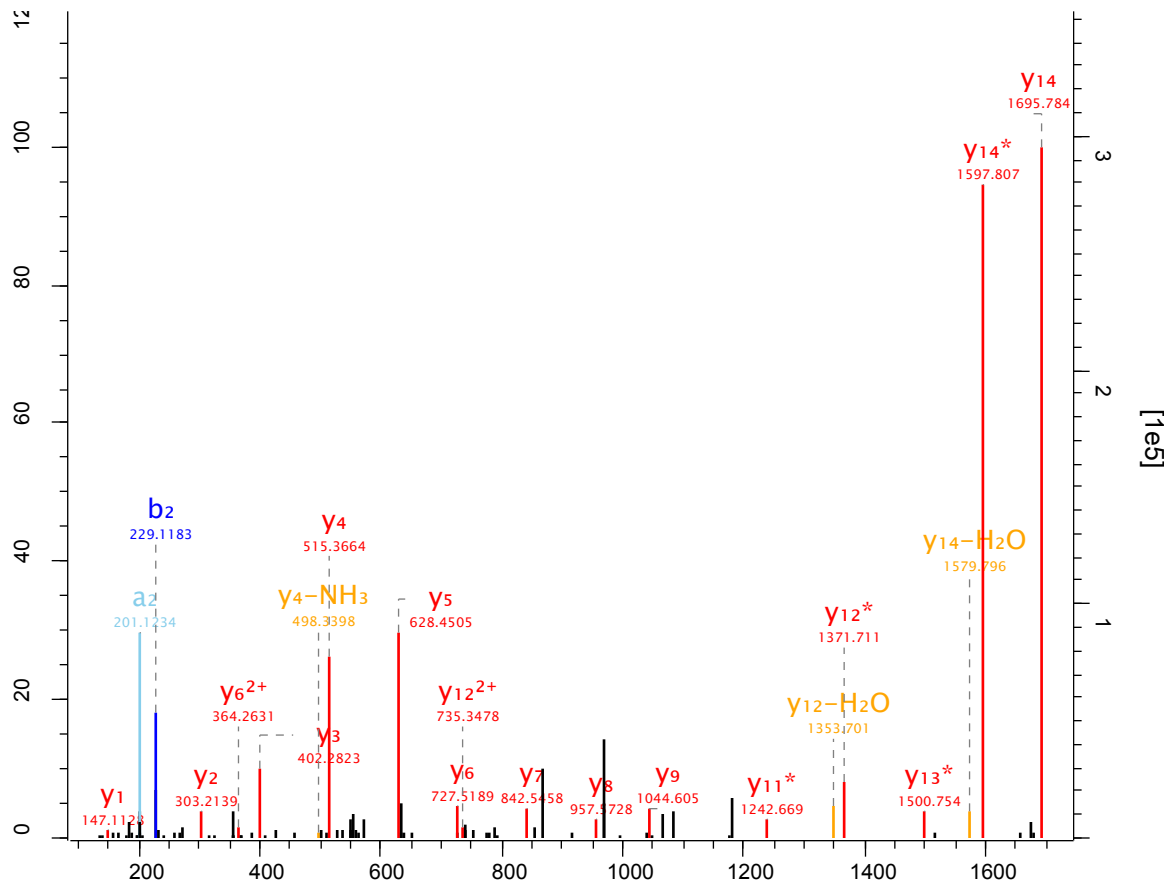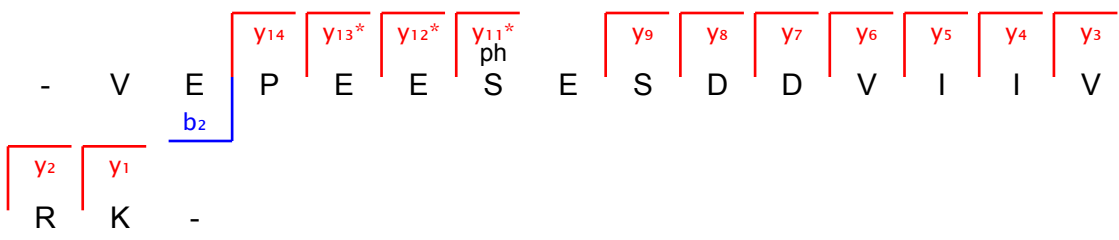



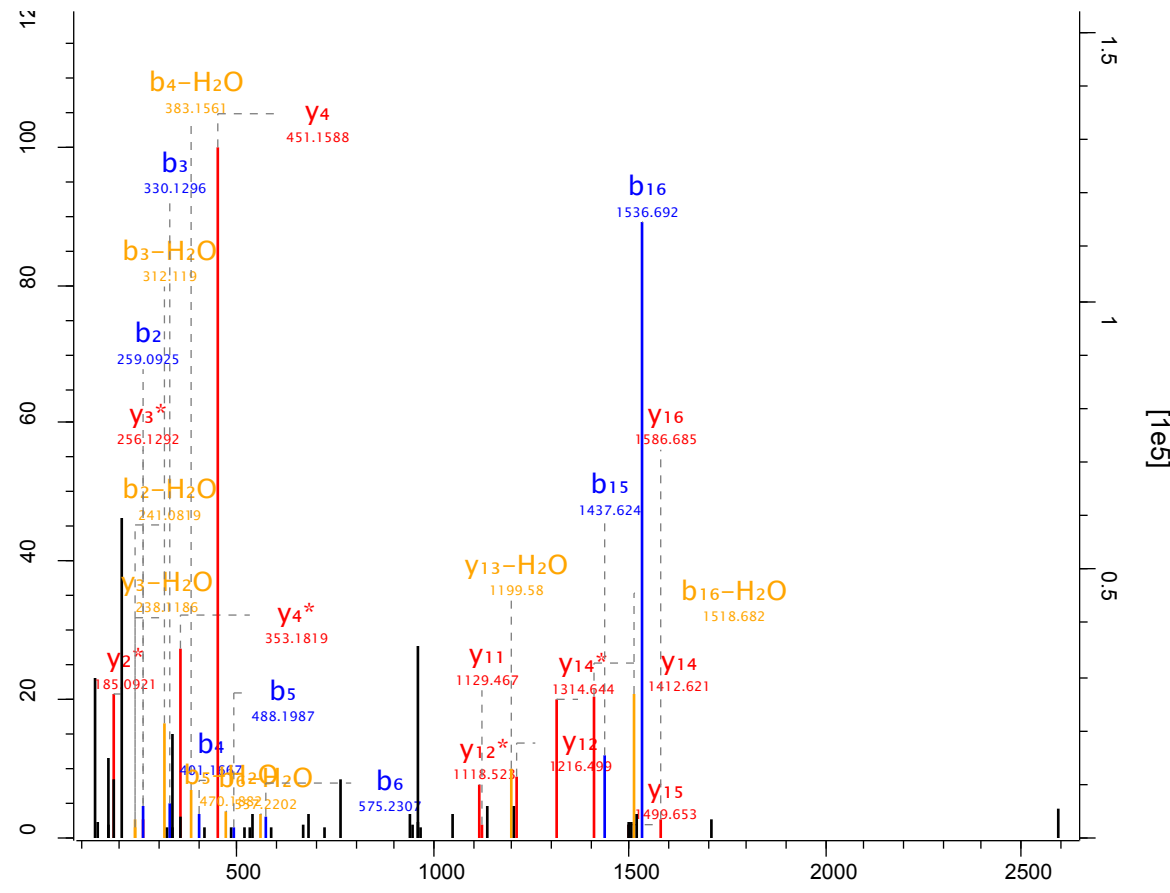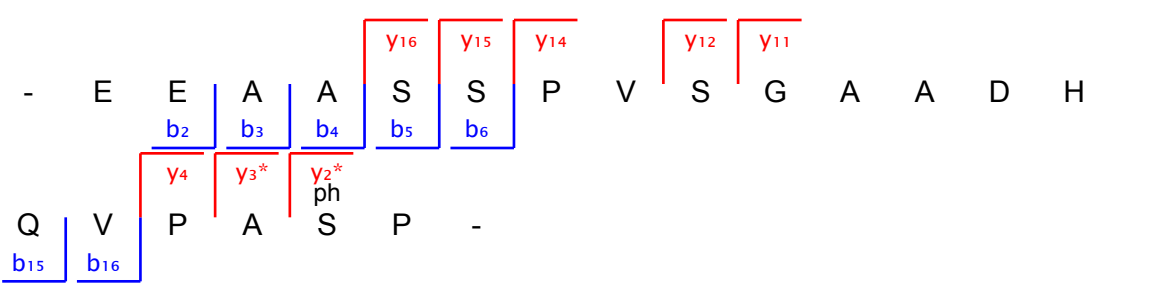

Raw file Scan Method Score m/z  
 2013\_COL15\_34\_38\_151128201608 15455 FTMS; HCD 45.66 508.22

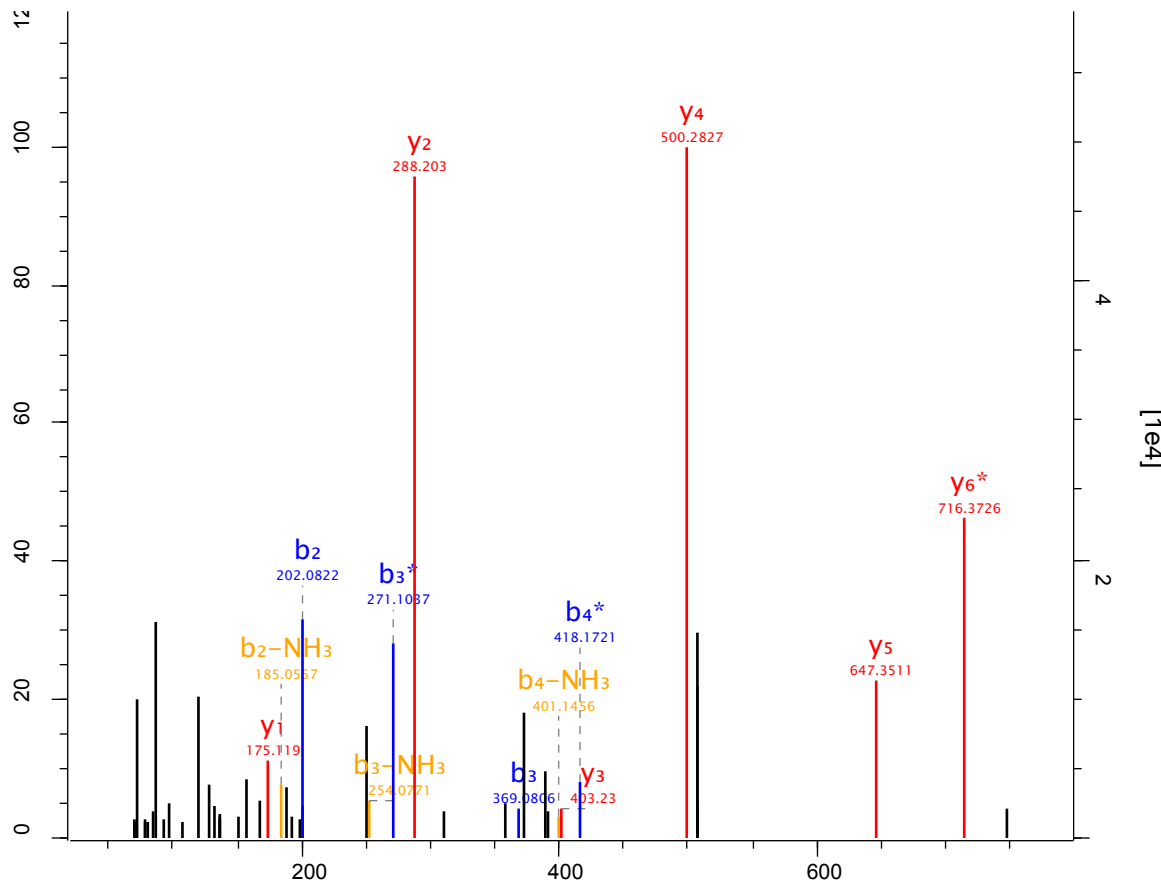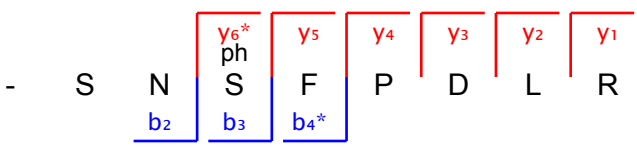

2013\_COL15\_34\_38\_151128201608

15667

FTMS; HCD

83.54

776.82

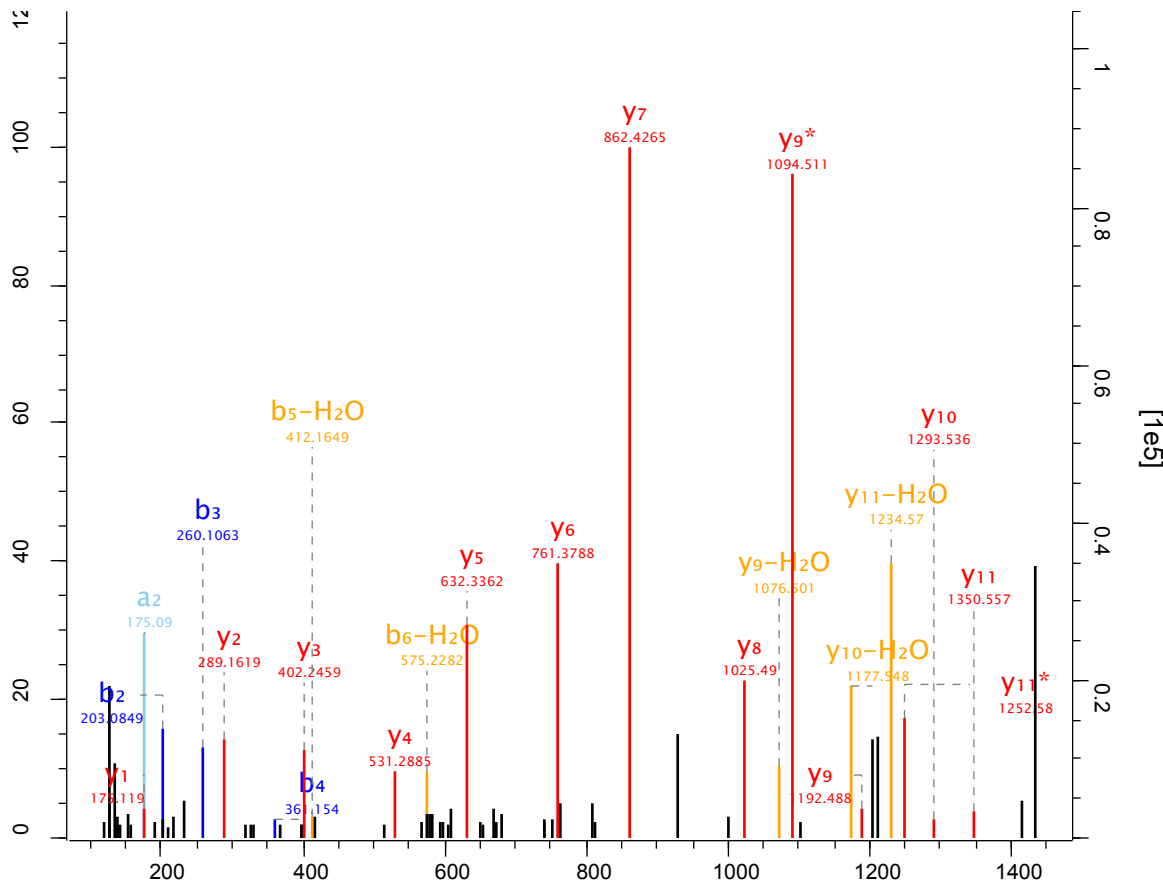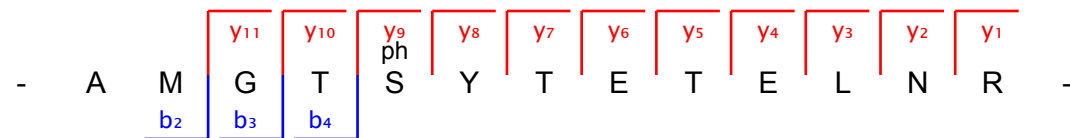

2013\_COL15\_34\_38\_151128201608

15677

FTMS; HCD

54.9

656.29

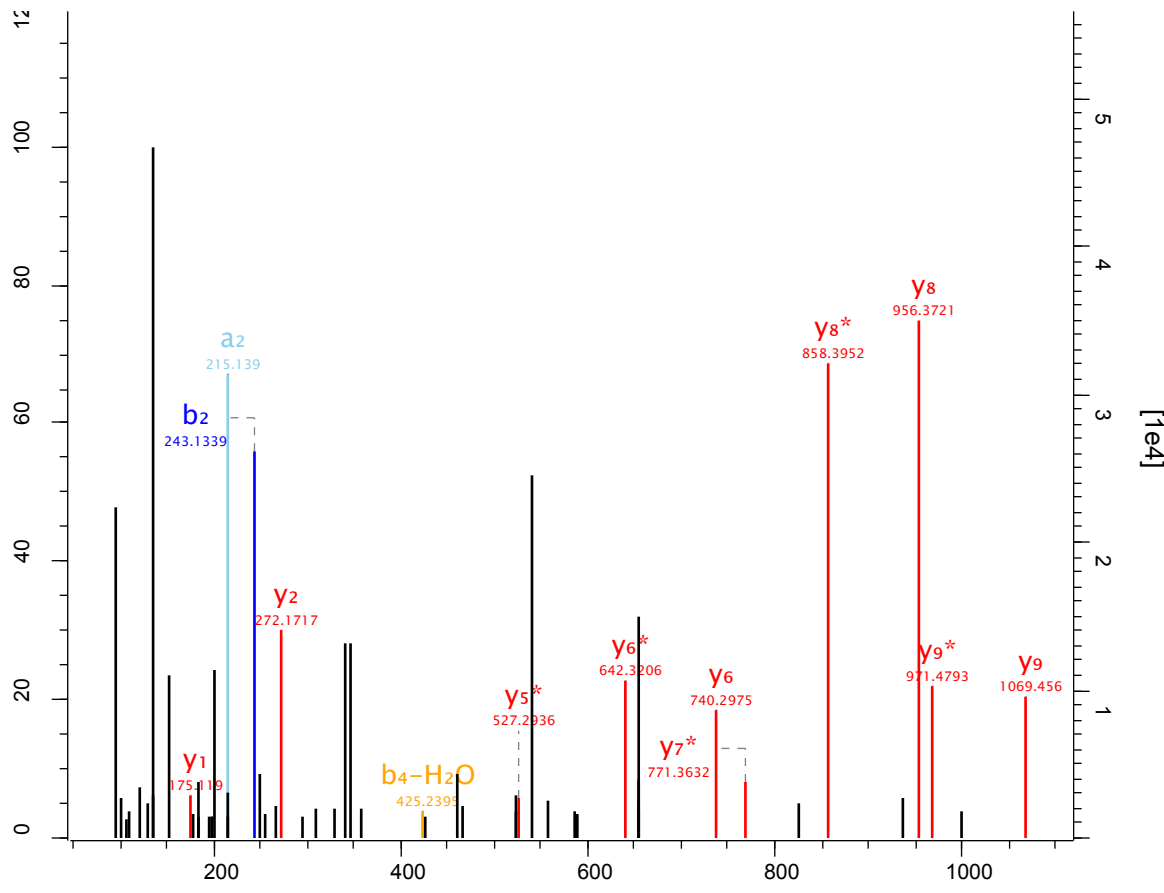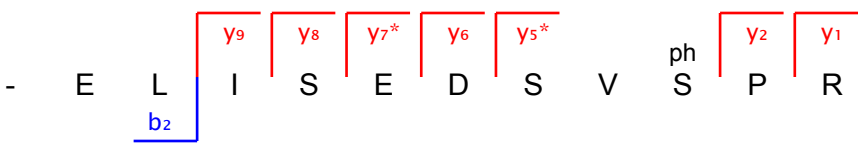

2013\_COL15\_34\_38\_151128201608

15684

FTMS; HCD

59.71

682.3

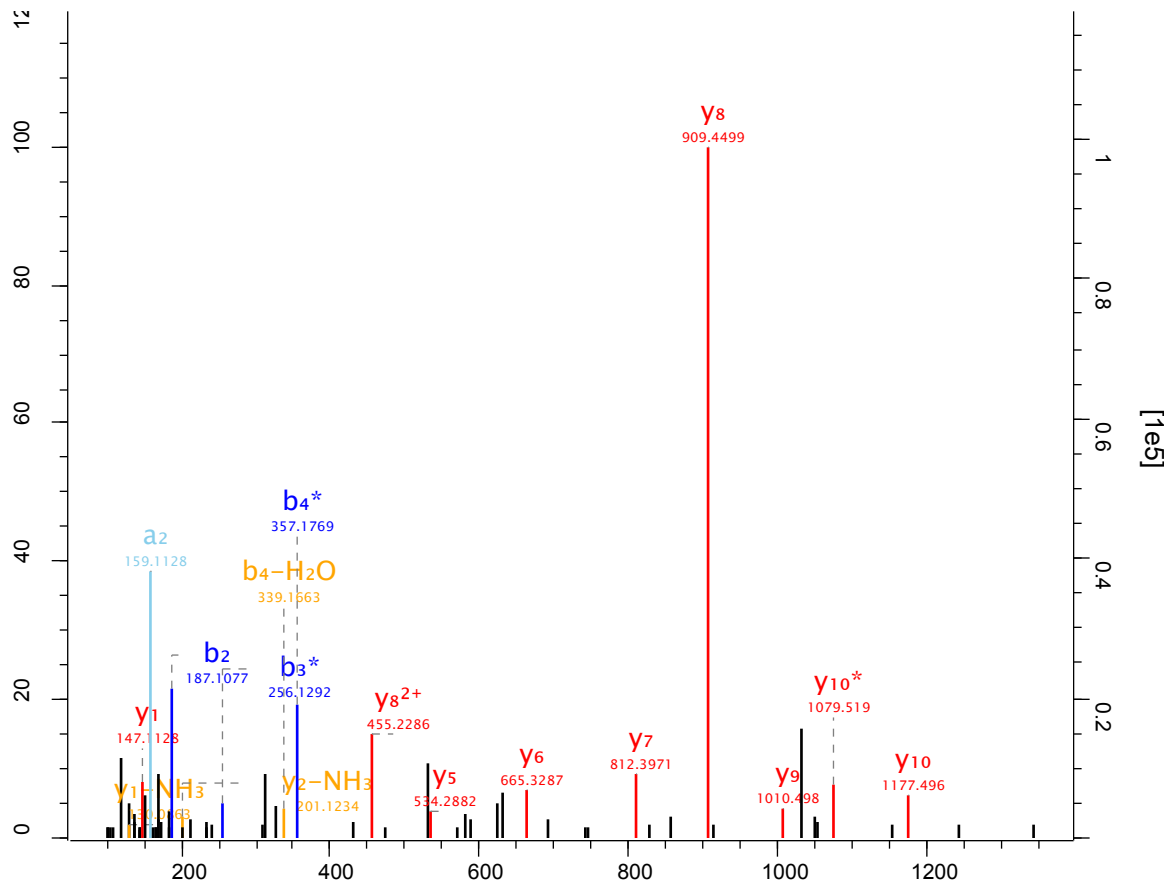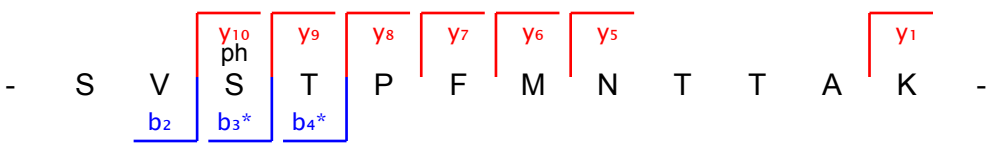

Raw file Scan Method Score m/z  
 2013\_COL15\_34\_38\_151128201608 16042 FTMS; HCD 66.06 461.71

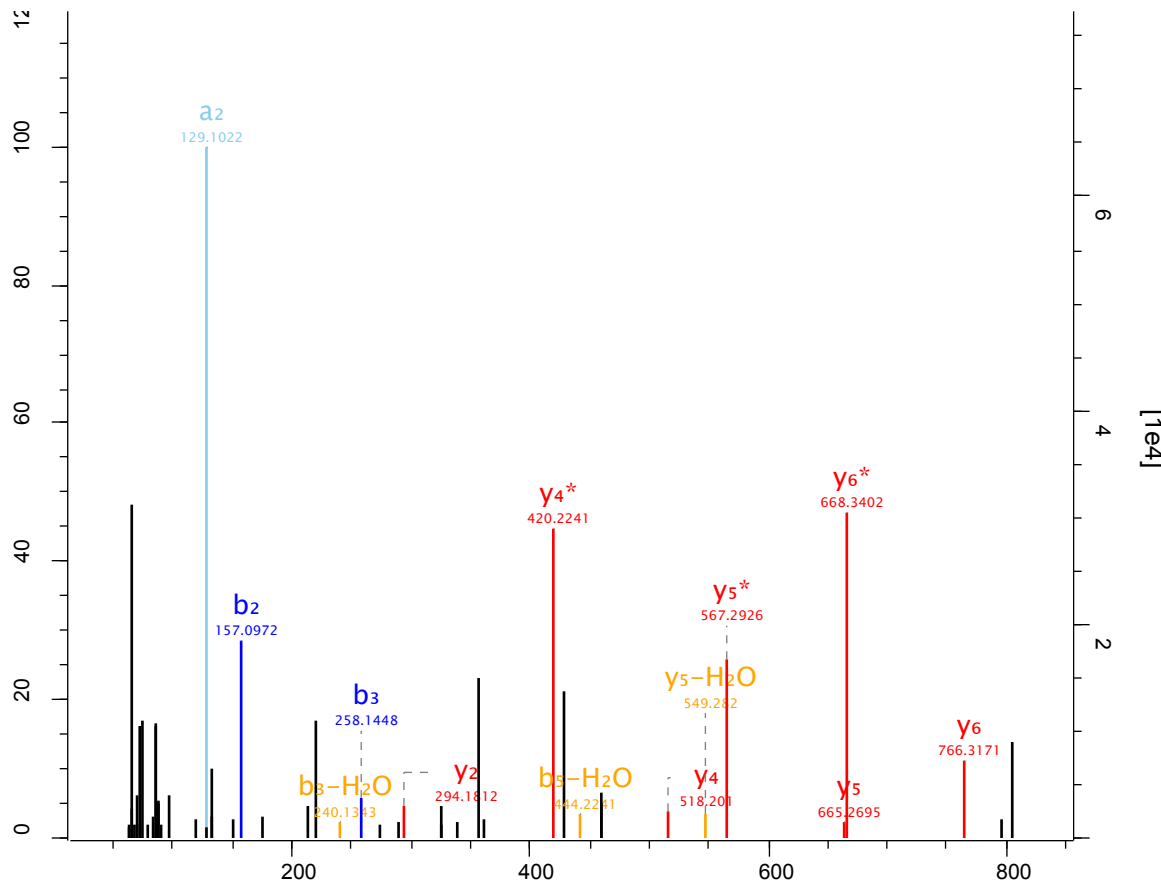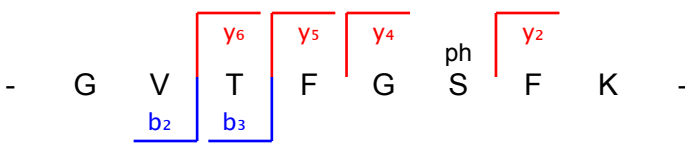

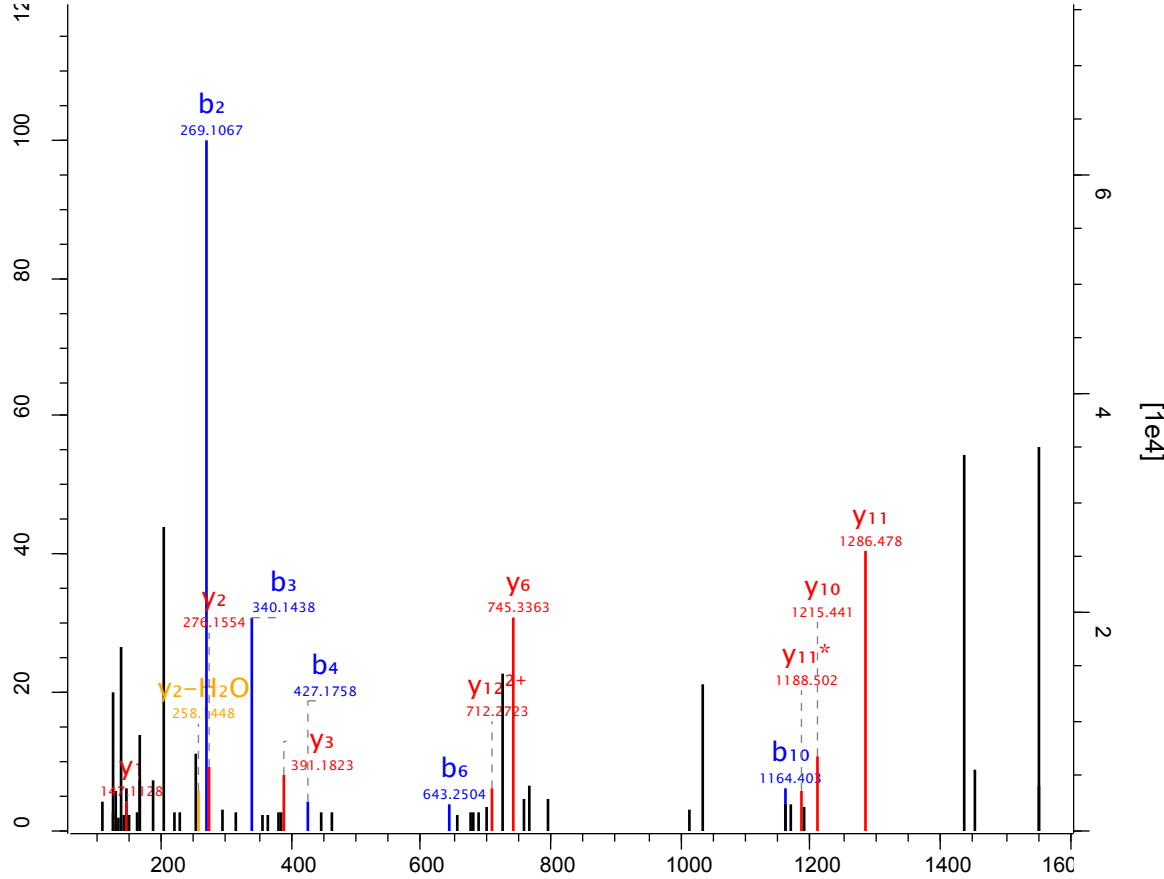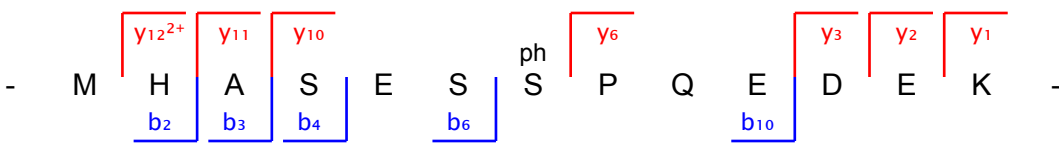

Raw file Scan Method Score m/z  
 2013\_COL15\_34\_38\_151128201608 16248 FTMS; HCD 55.21 591.23

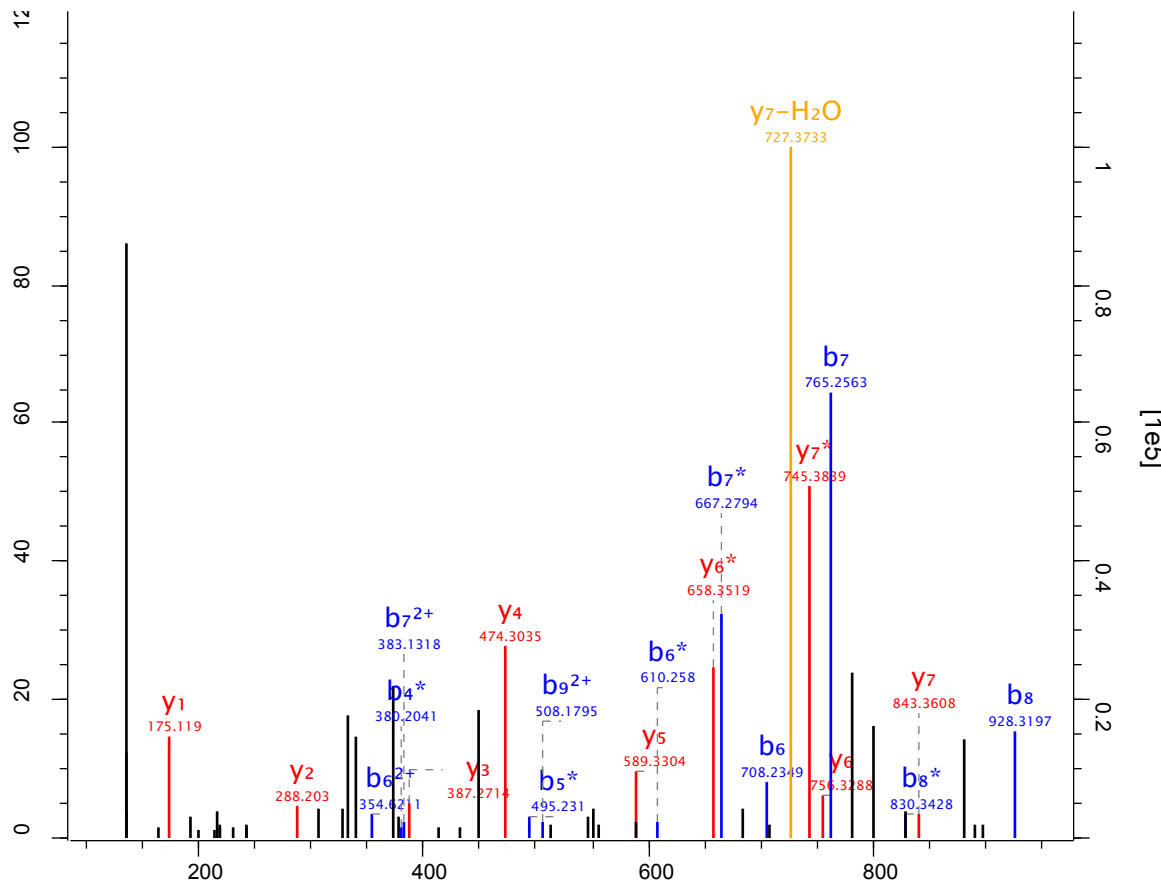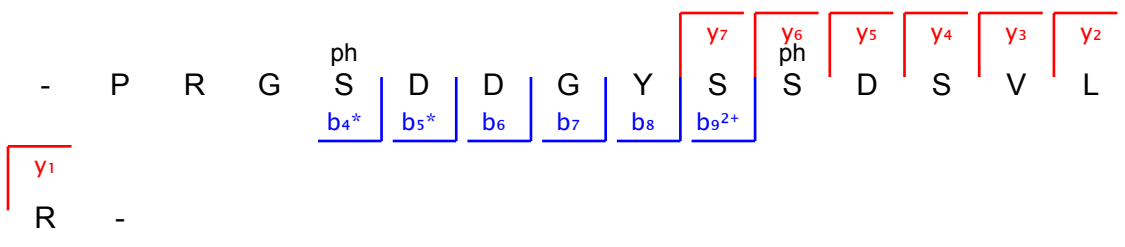



2013\_COL15\_34\_38\_151128201608

16299

FTMS; HCD

55.06

414.22

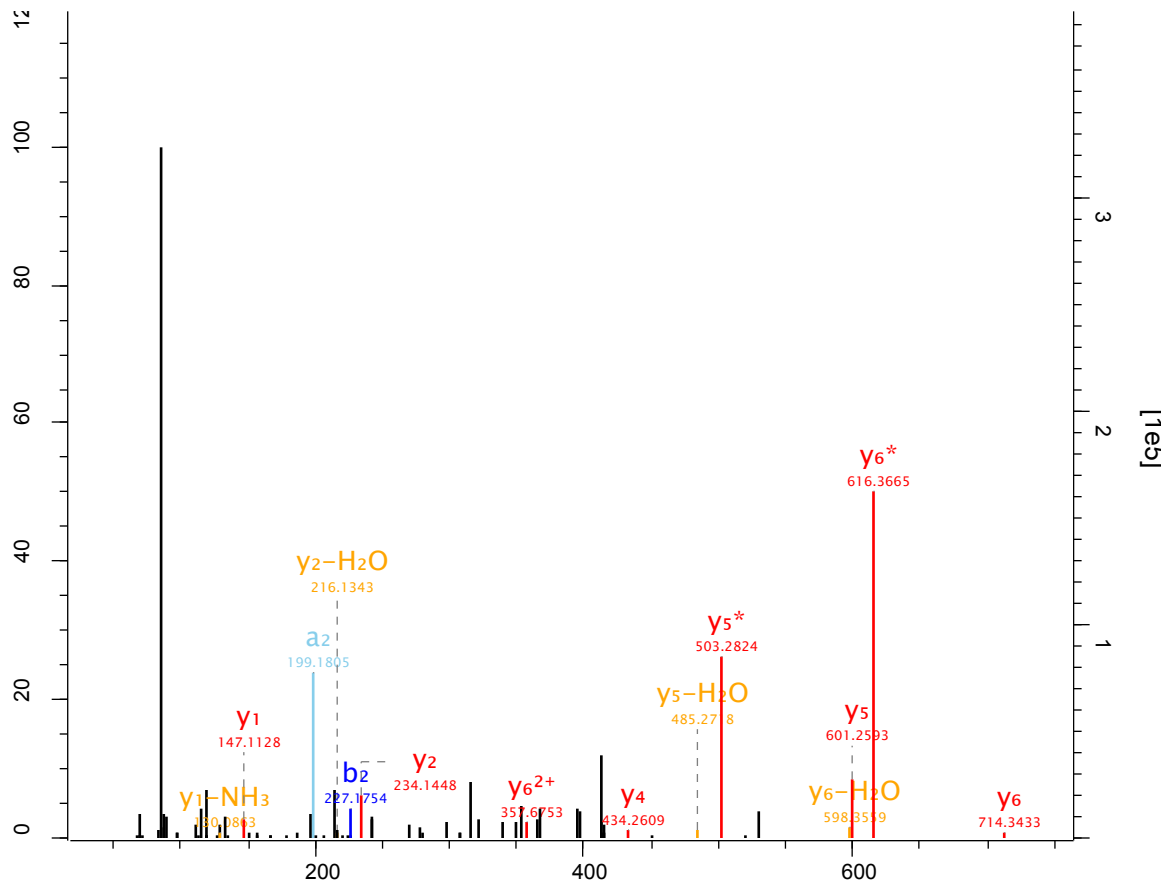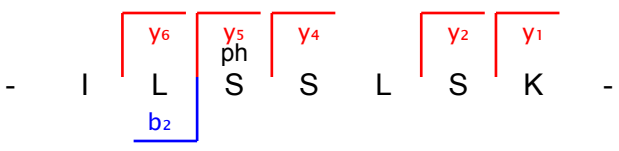

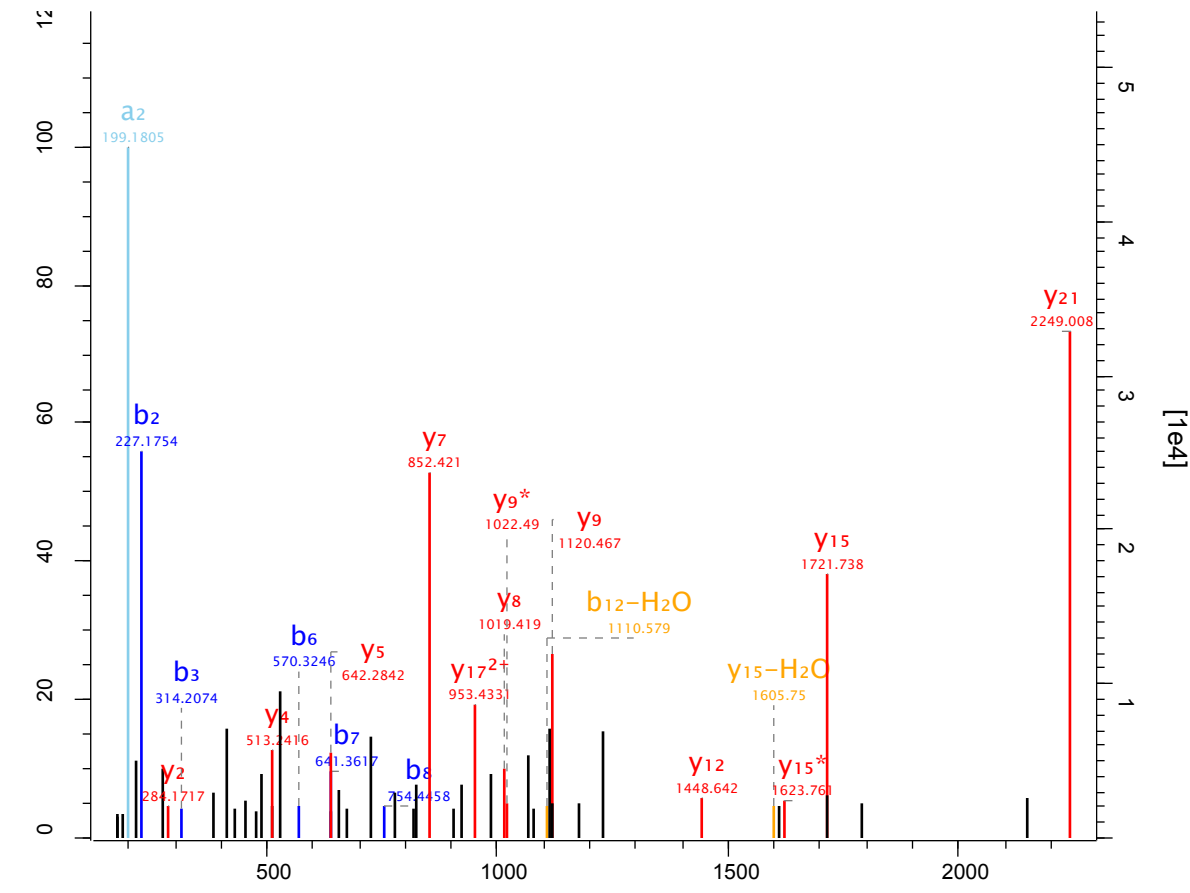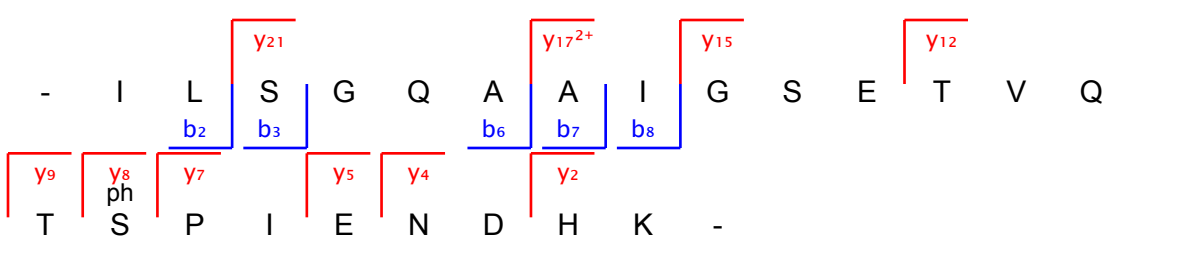

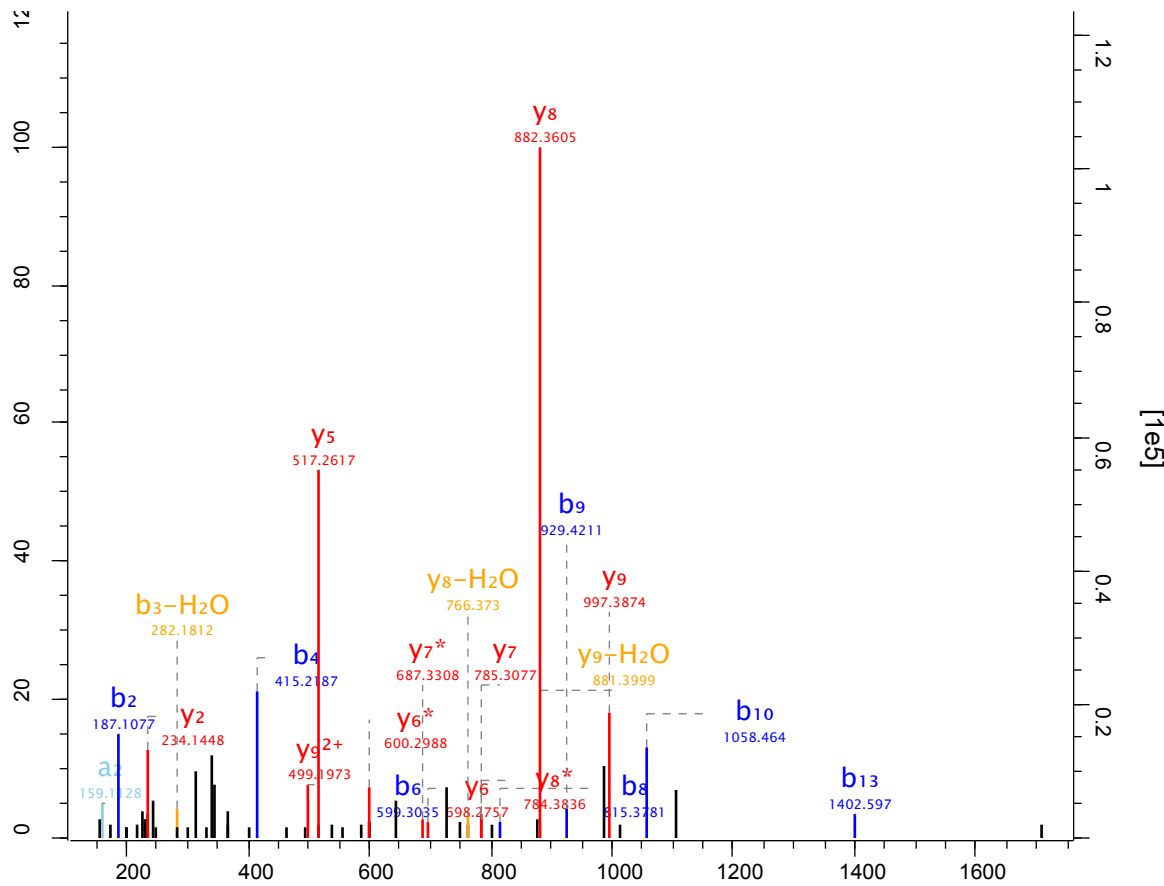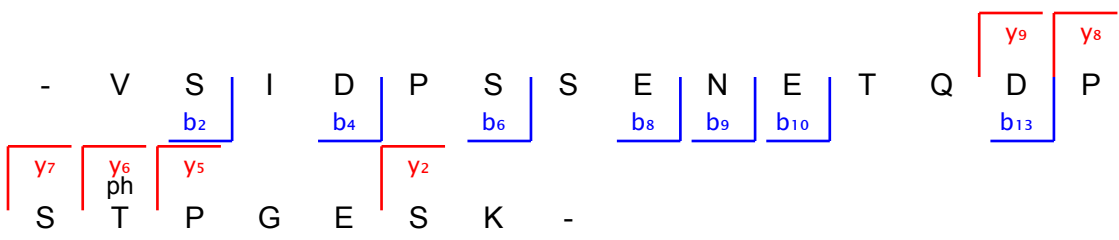

Raw file Scan Method Score m/z  
 2013\_COL15\_34\_38\_151128201608 1680 FTMS; HCD 60.33 605.59

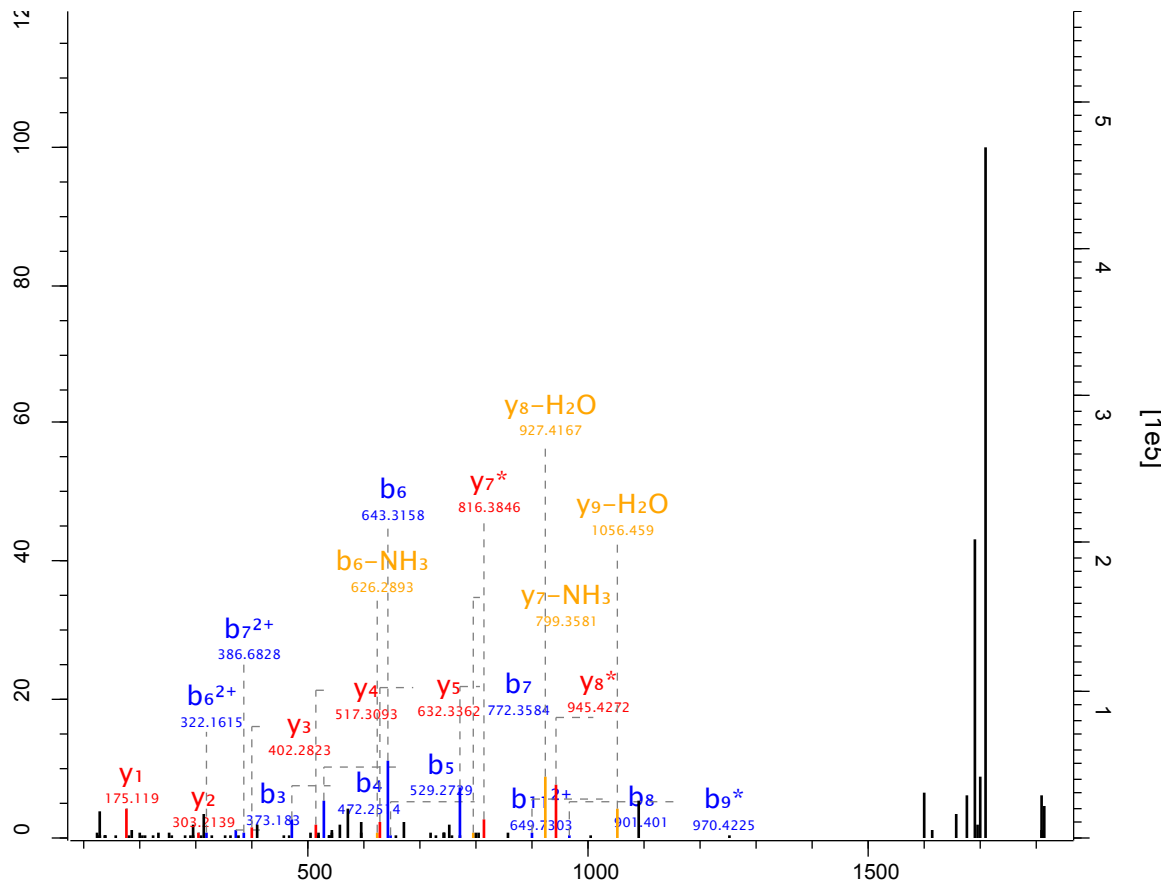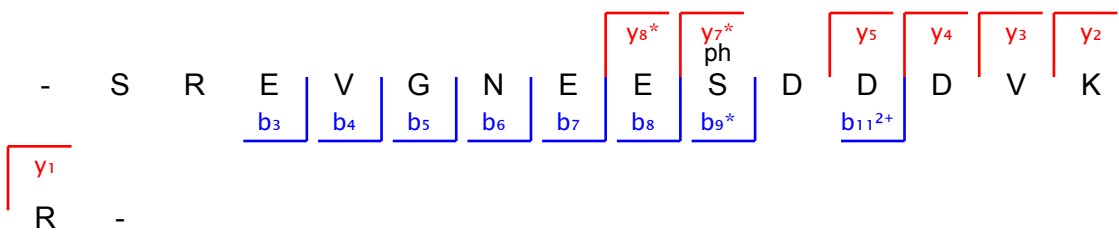

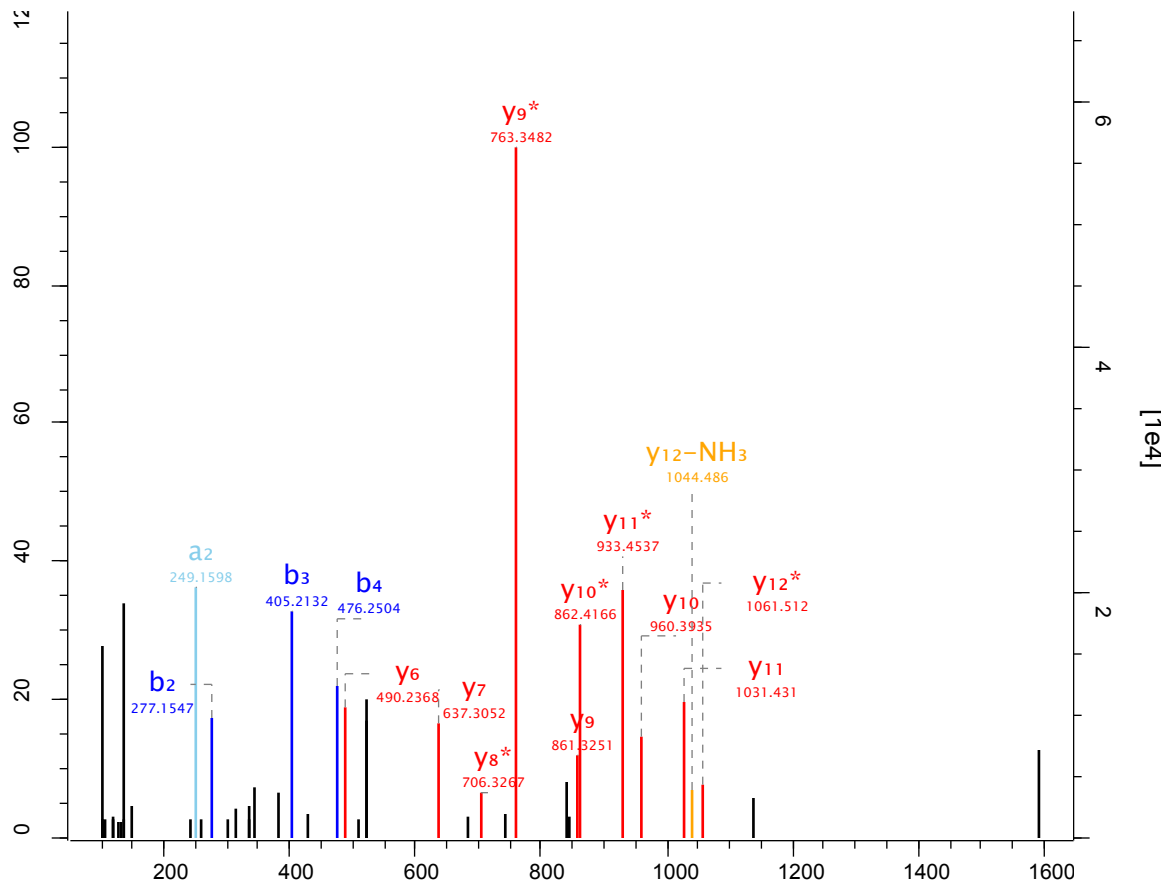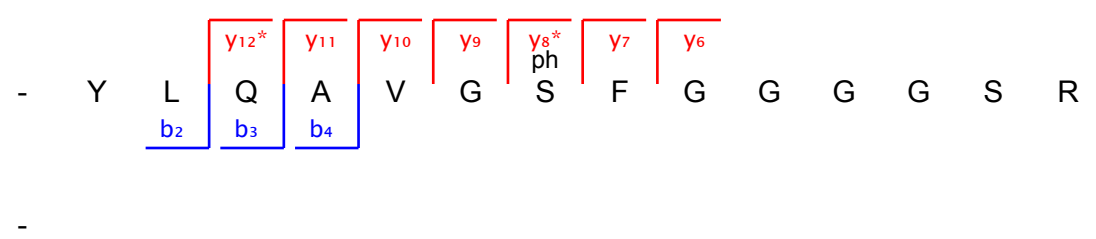

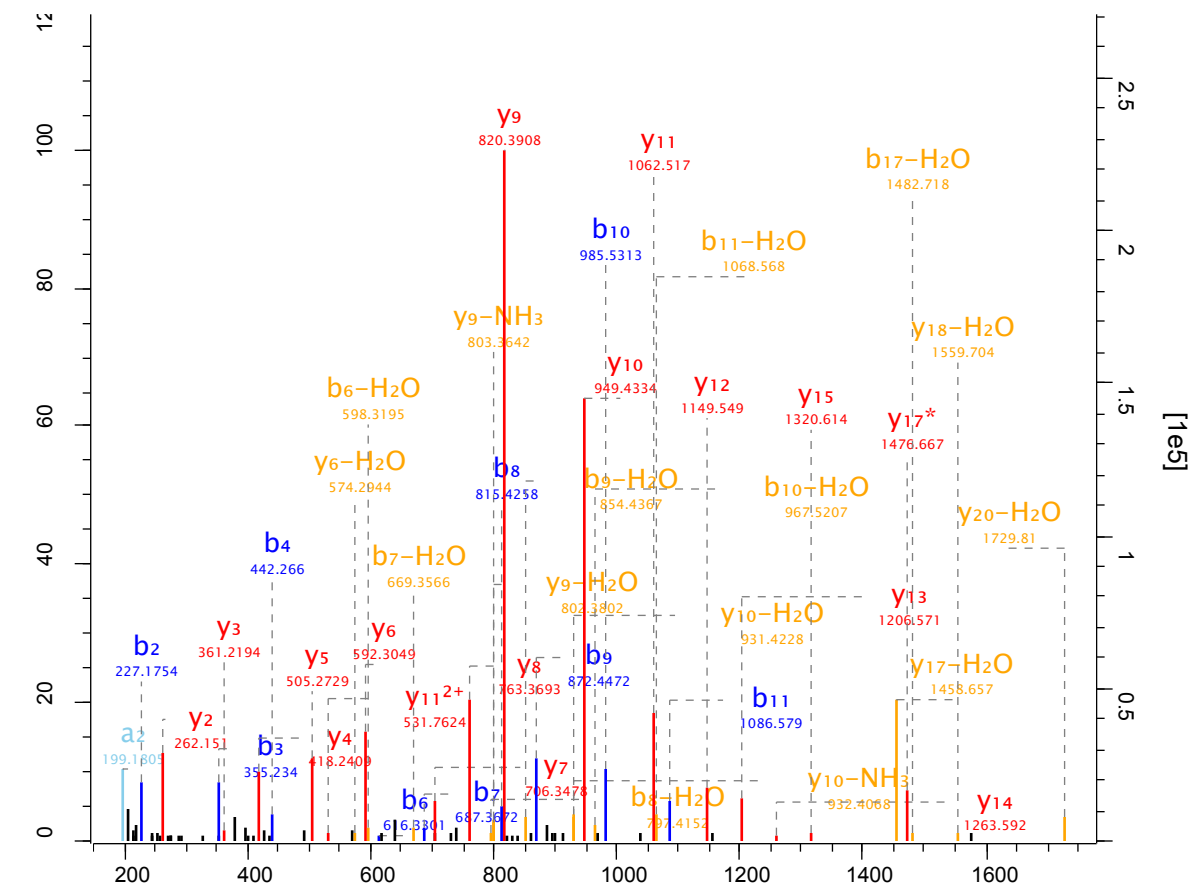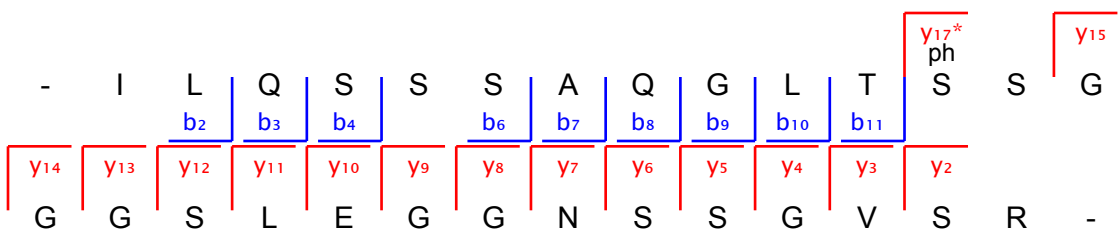

Raw file 2013\_COL15\_34\_38\_151128201608 Scan 16997 Method FTMS; HCD Score 79.49 m/z 901.85

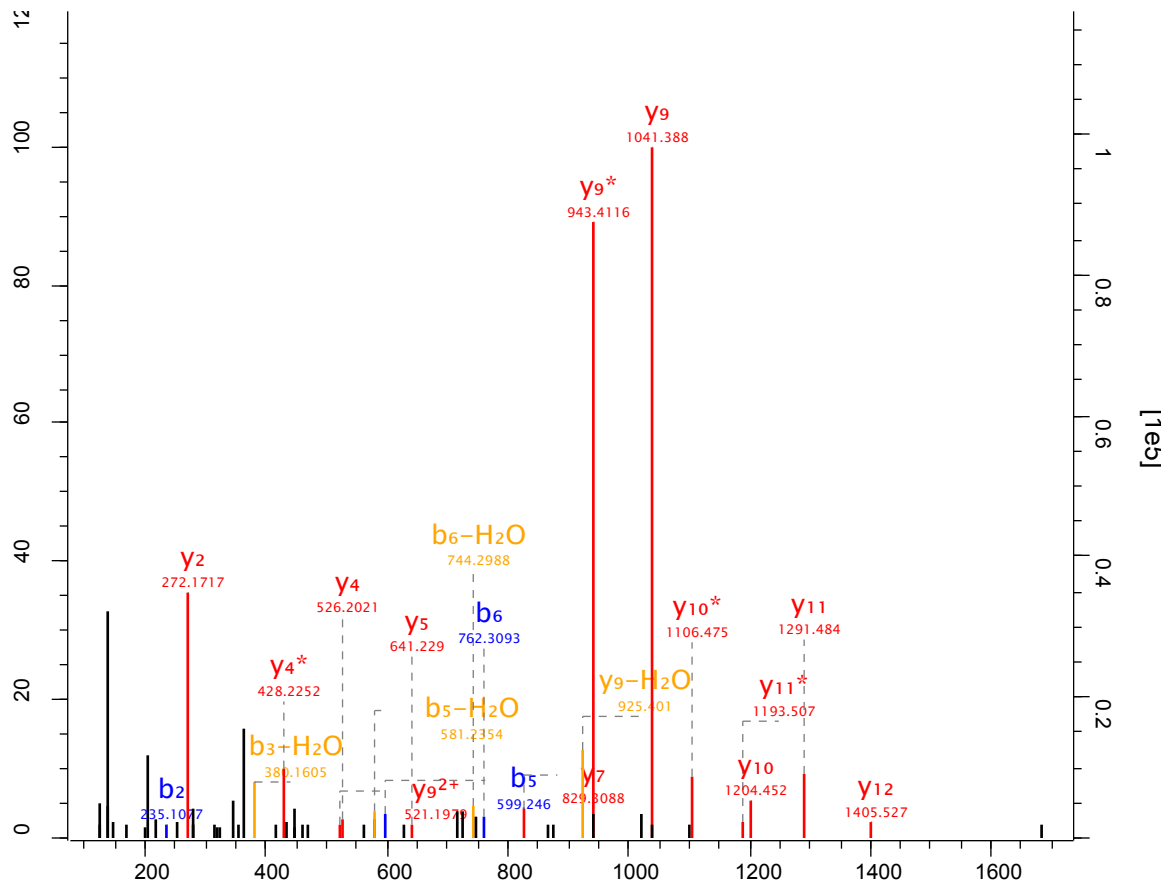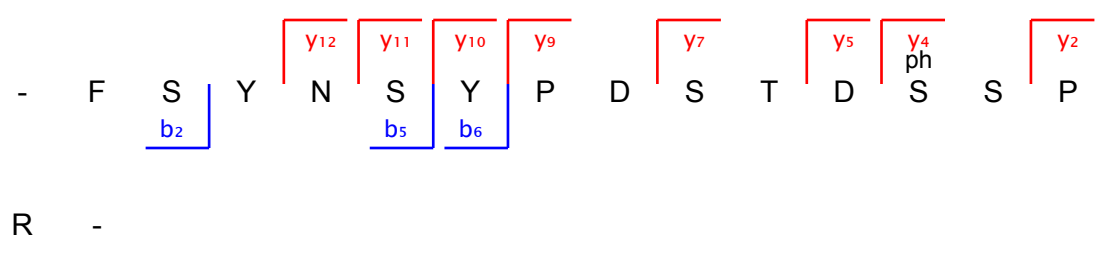

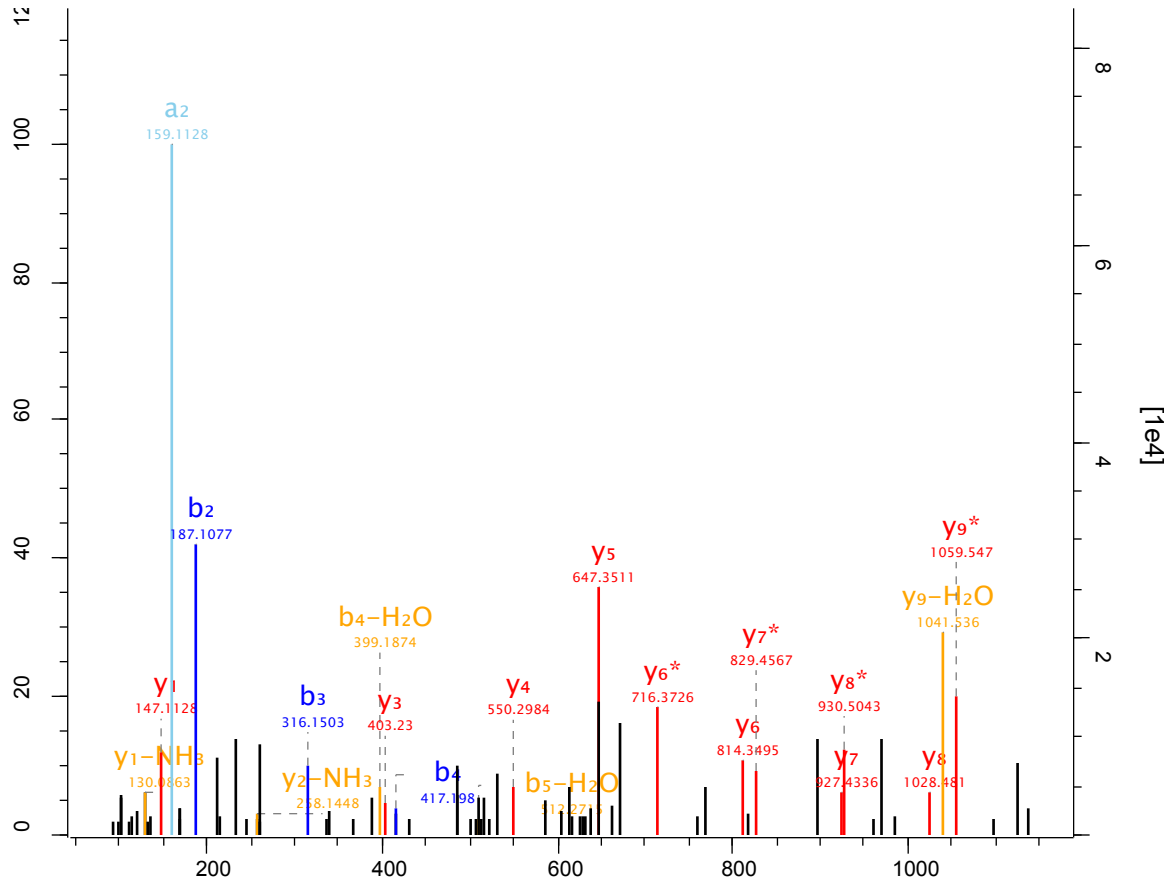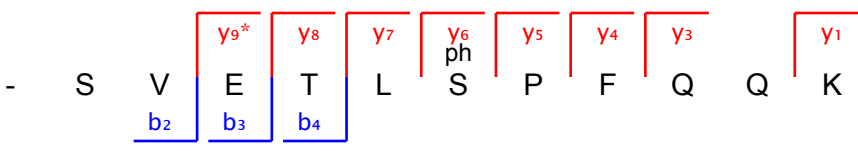



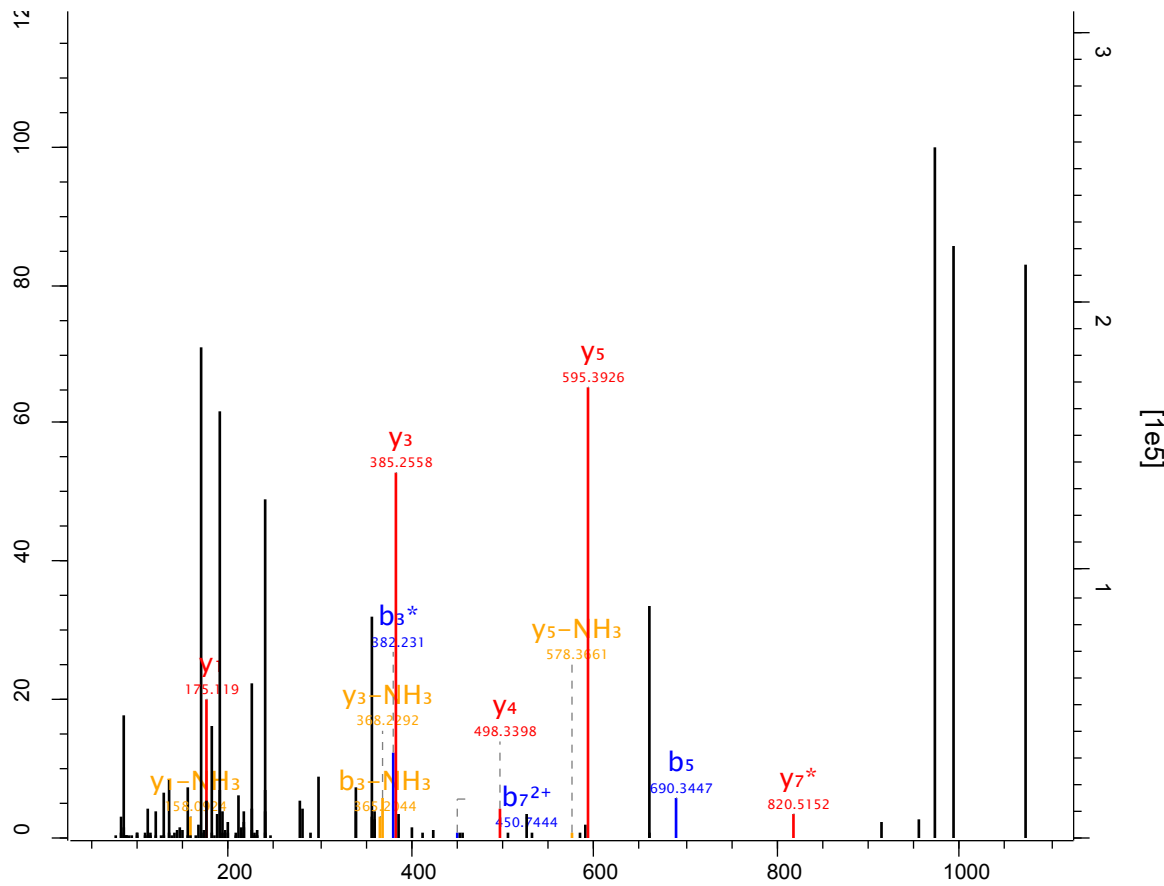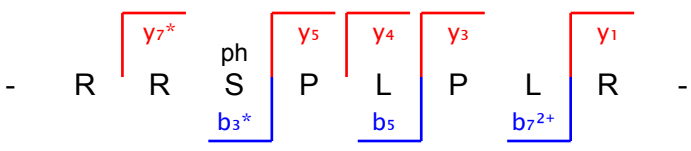

2013\_COL15\_34\_38\_151128201608

17236

FTMS; HCD

99.06

759.38

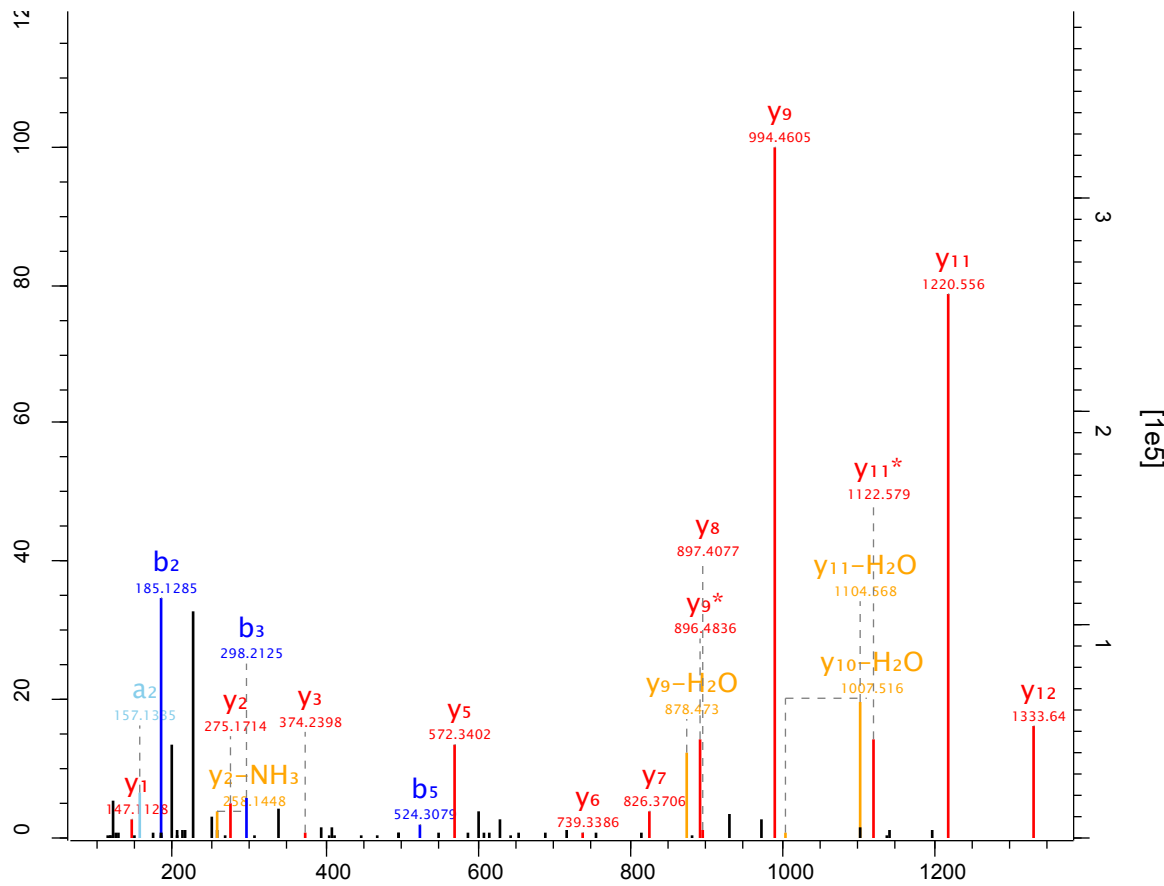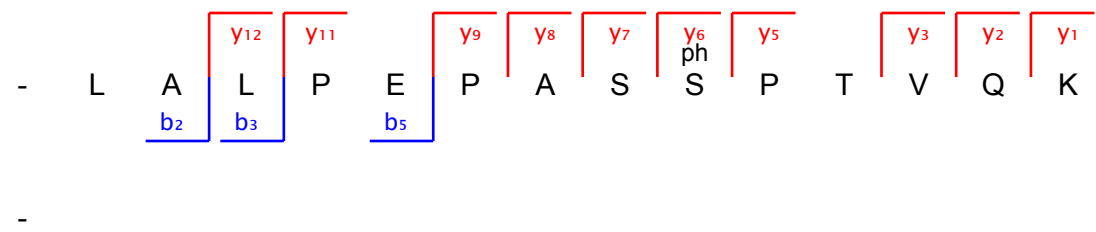

2013\_COL15\_34\_38\_151128201608

17279

FTMS; HCD

57.74

784.37

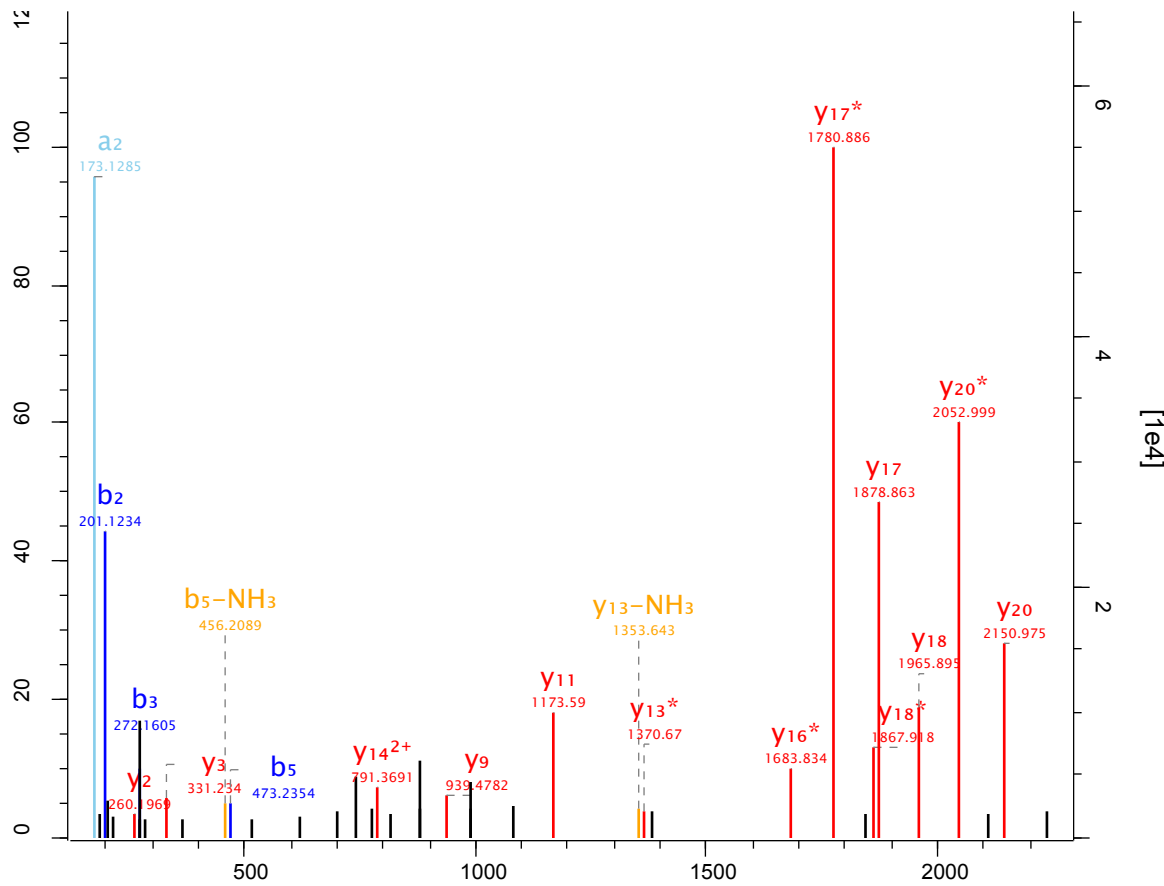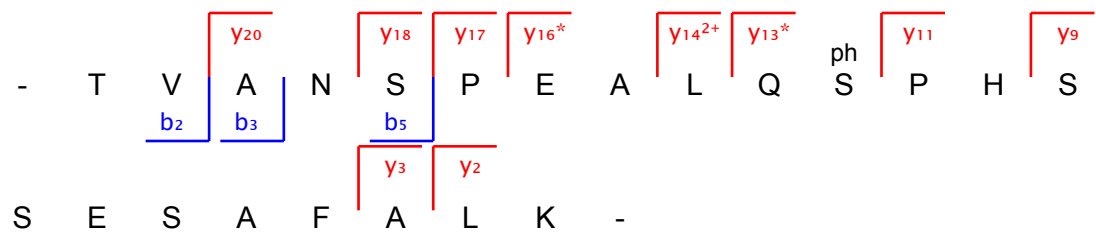

2013\_COL15\_34\_38\_151128201608

17430

FTMS; HCD

160.81

719.28

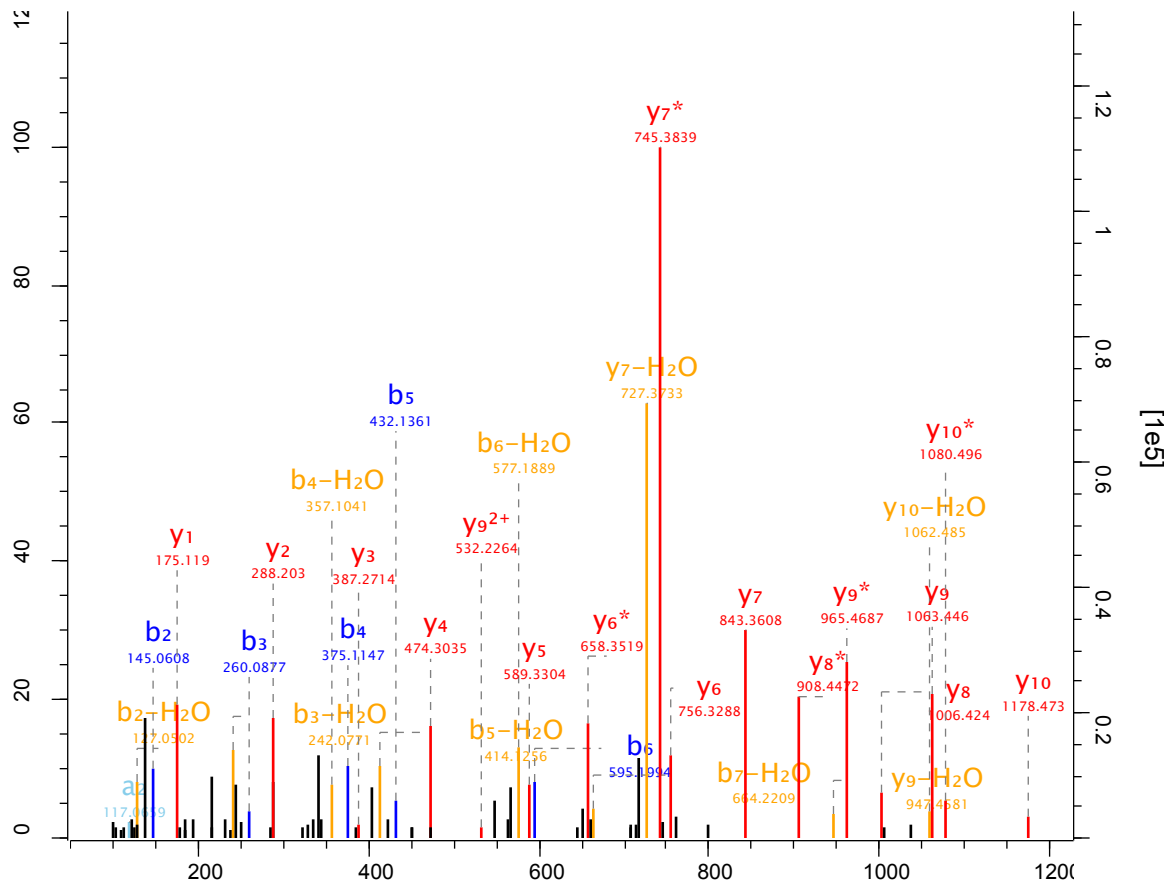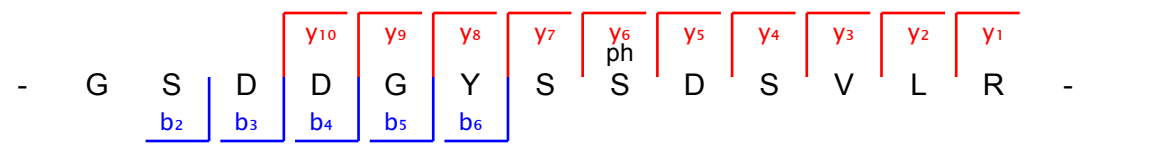

Raw file 2013\_COL15\_34\_38\_151128201608 Scan 17447 Method FTMS; HCD Score 82.45 m/z 792.88

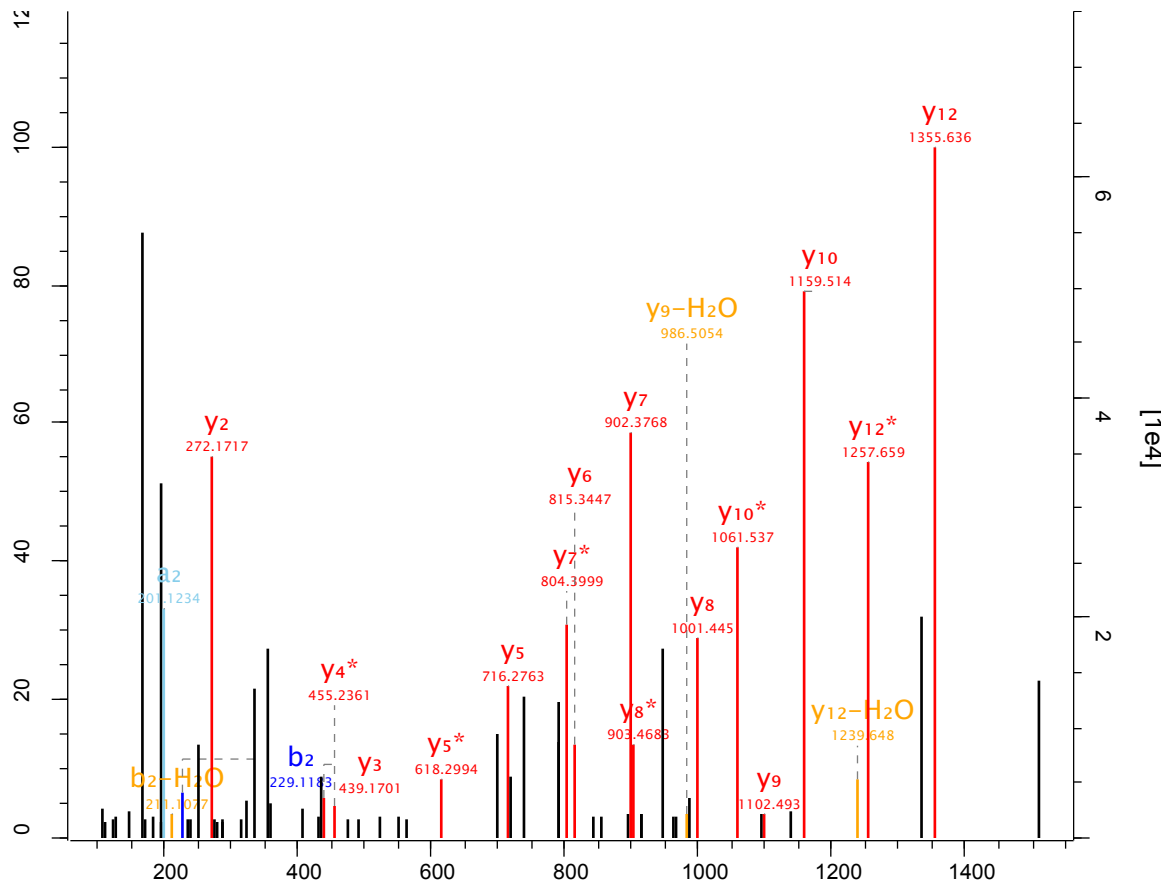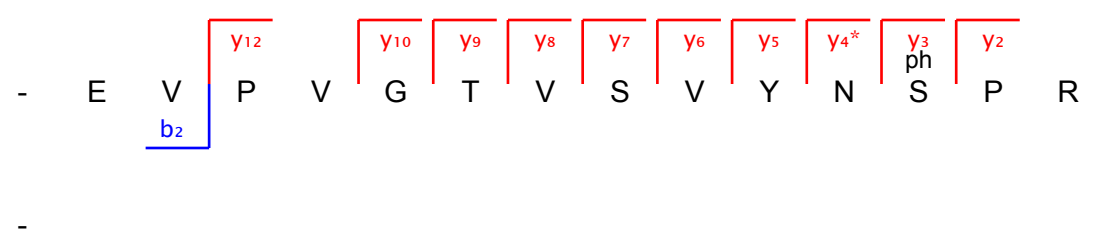

Raw file 2013\_COL15\_34\_38\_151128201608 Scan 17635 Method FTMS; HCD Score 50.83 m/z 799.36

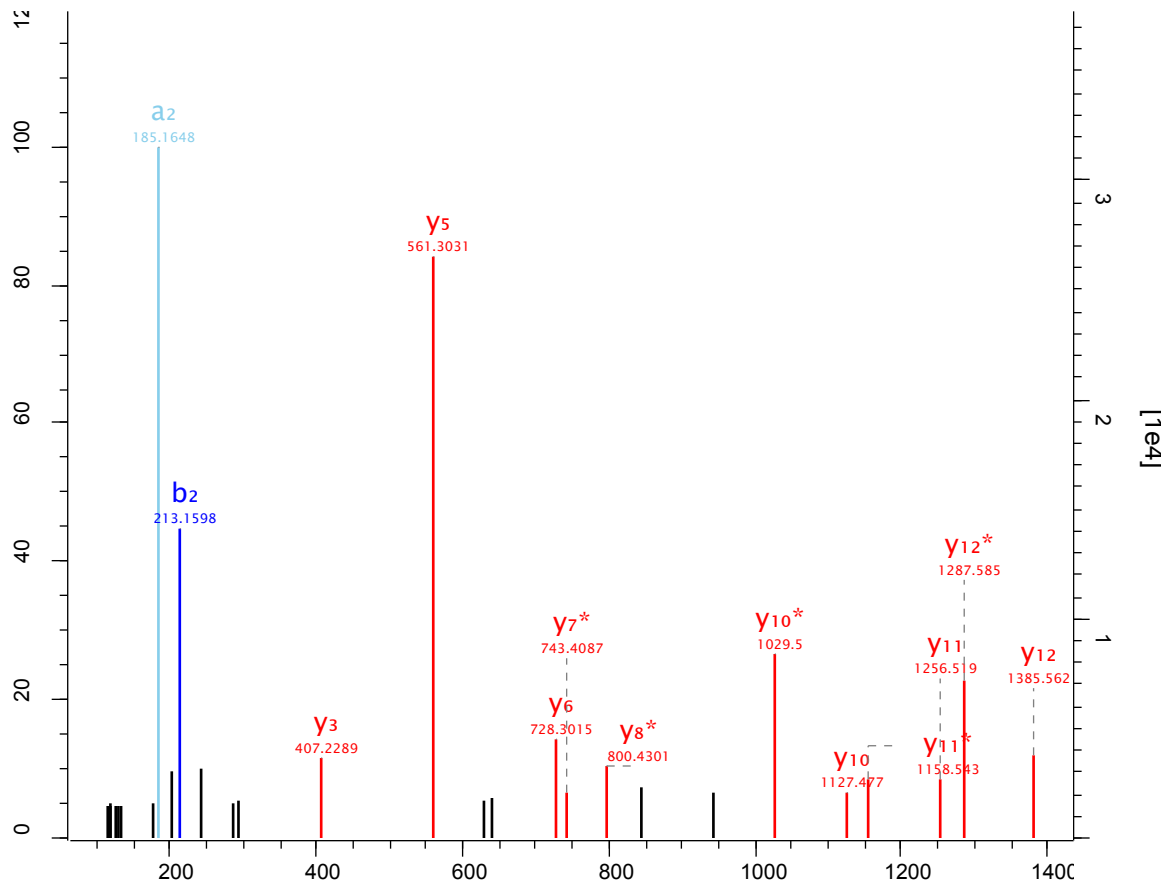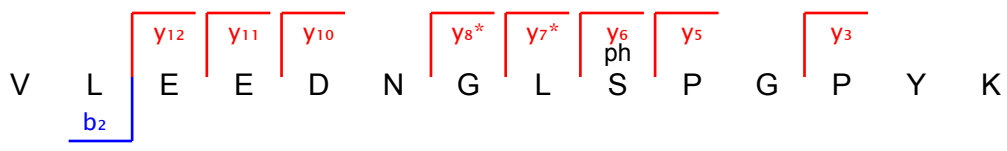

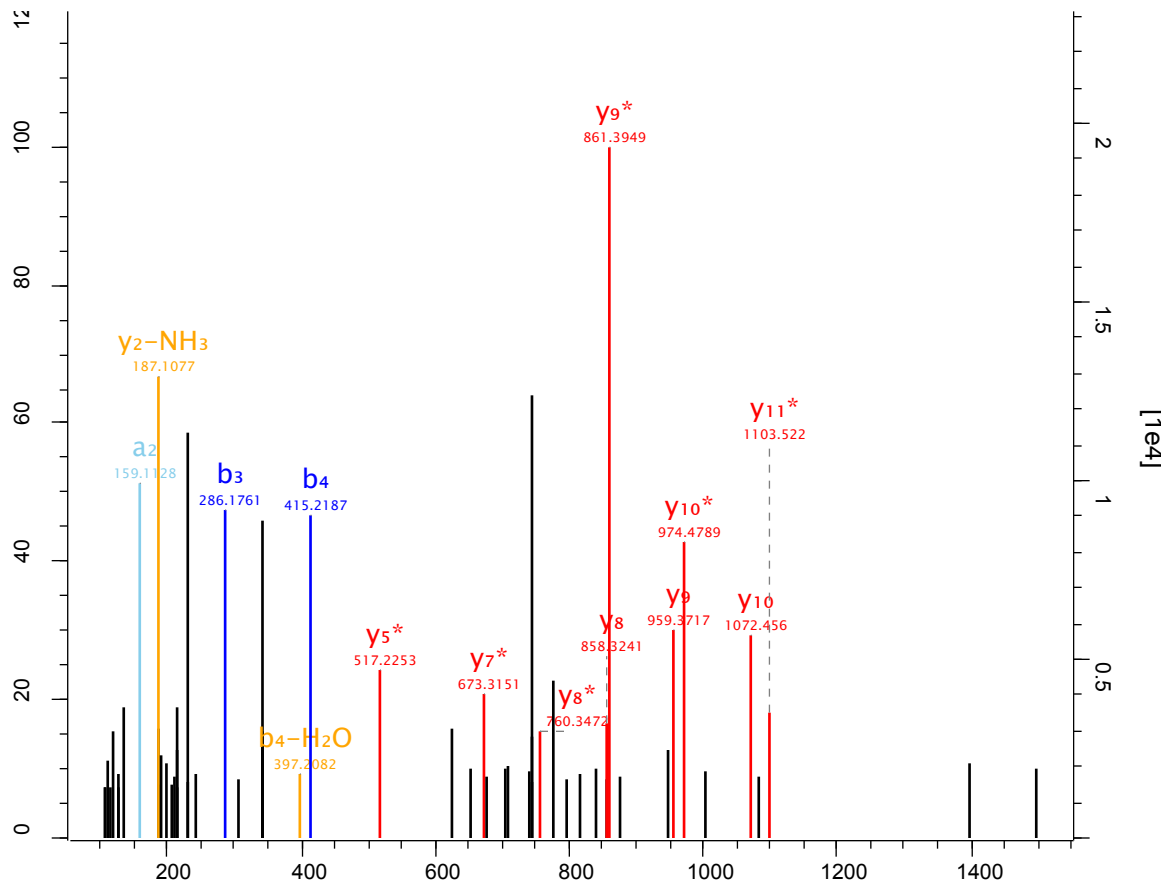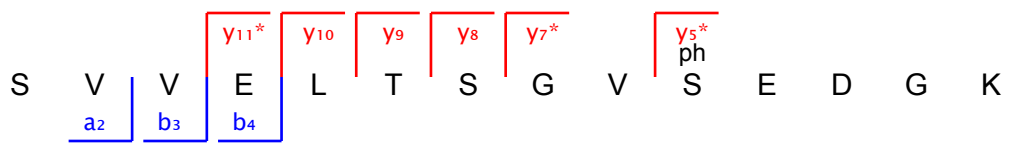

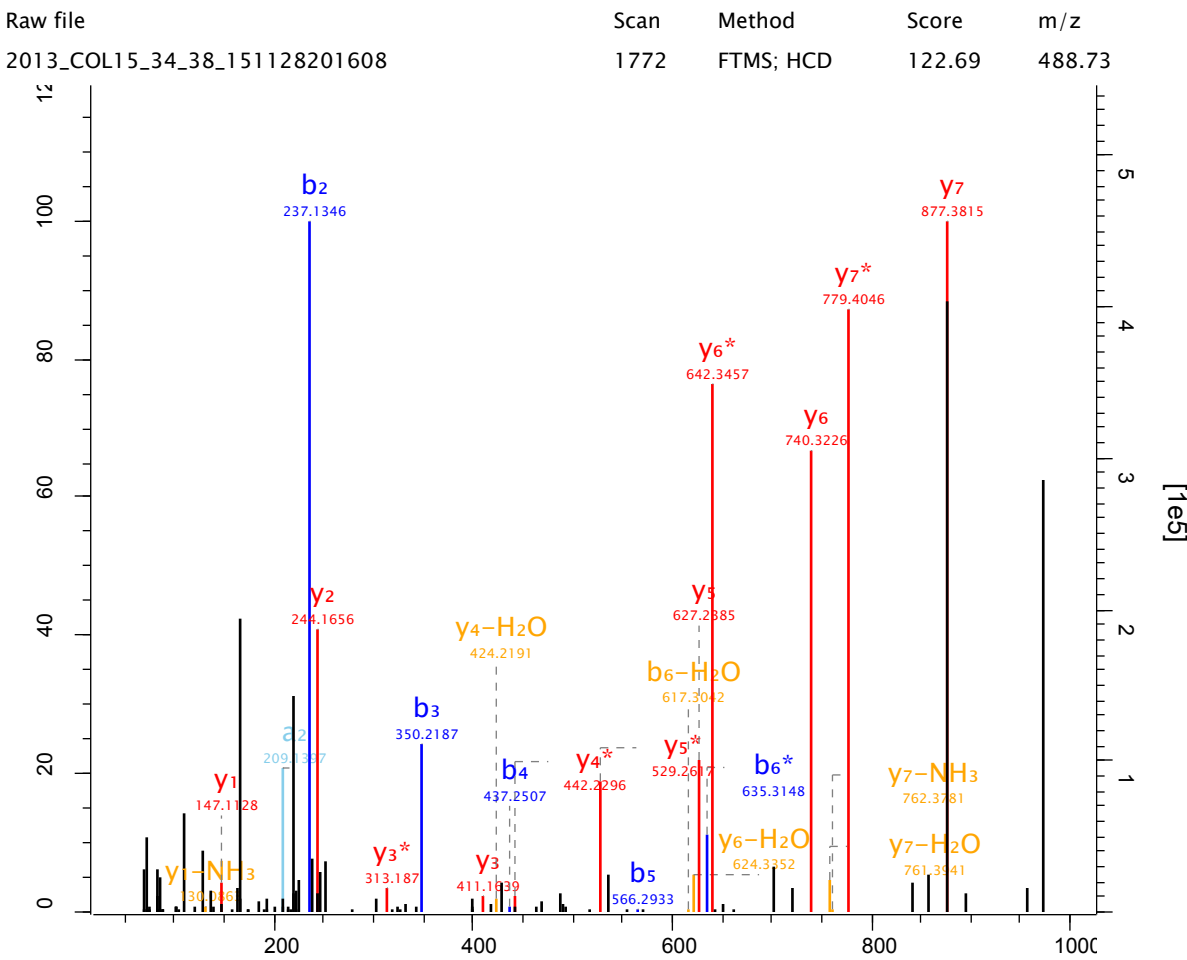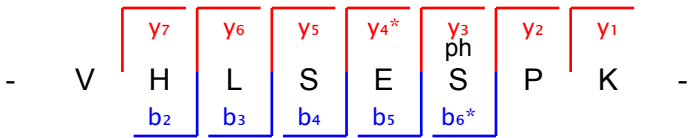



2013\_COL15\_34\_38\_151128201608

17725

FTMS; HCD

114.21

612.8

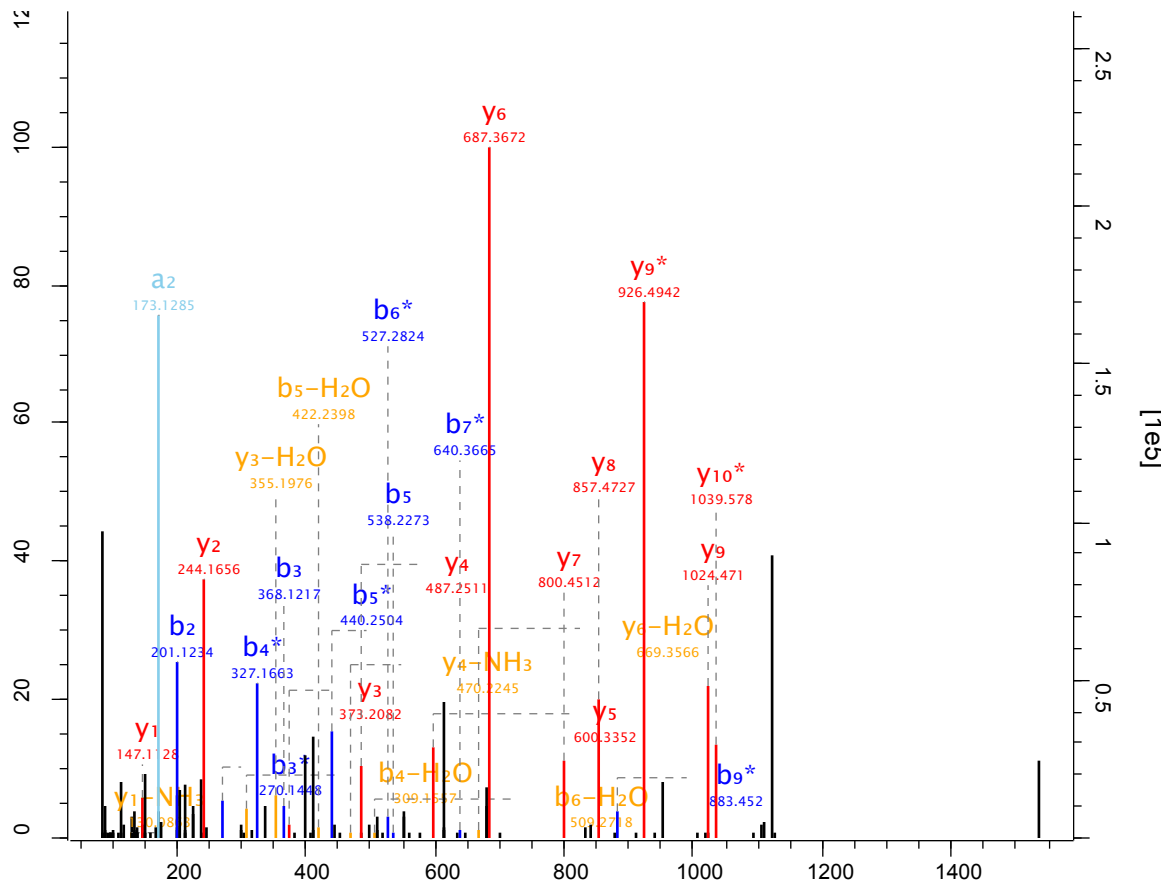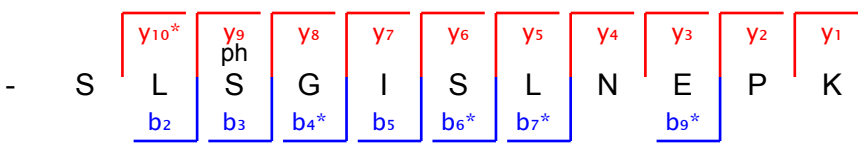

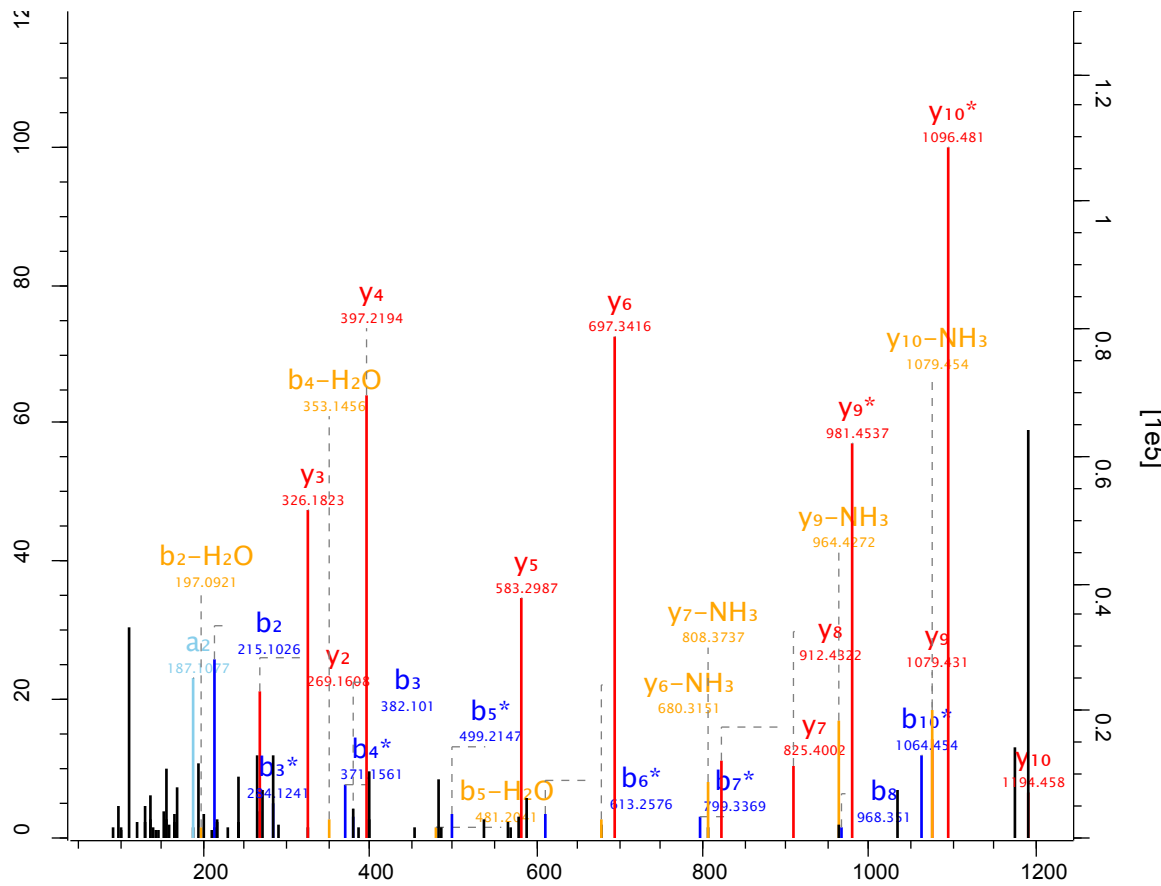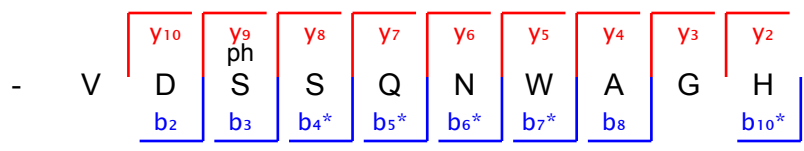

2013\_COL15\_34\_38\_151128201608

18106

FTMS; HCD

108.72

573.25

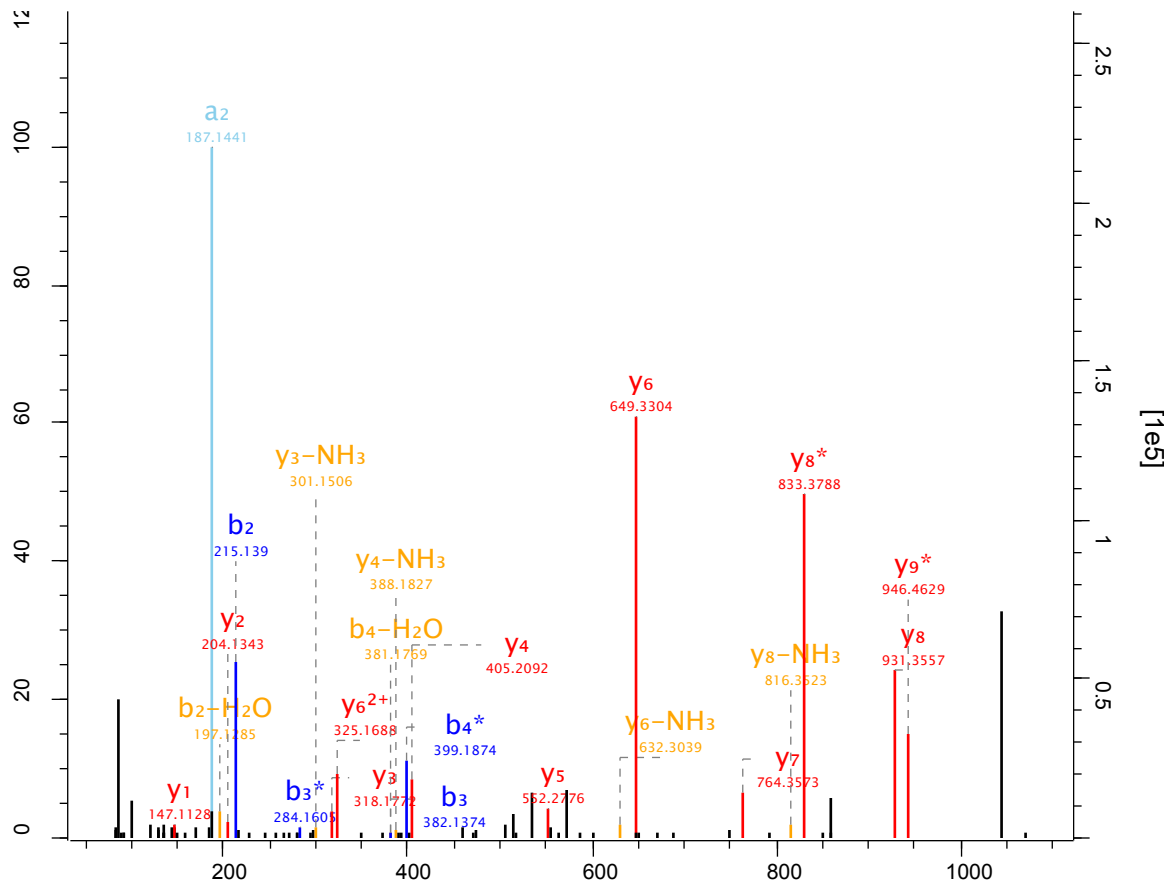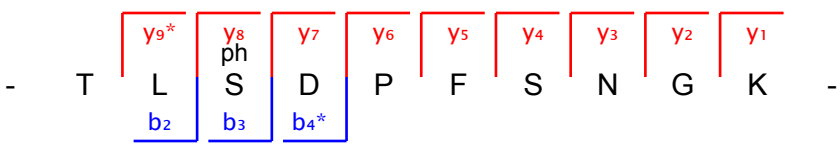

2013\_COL15\_34\_38\_151128201608

18150

FTMS; HCD

169.37

678.8

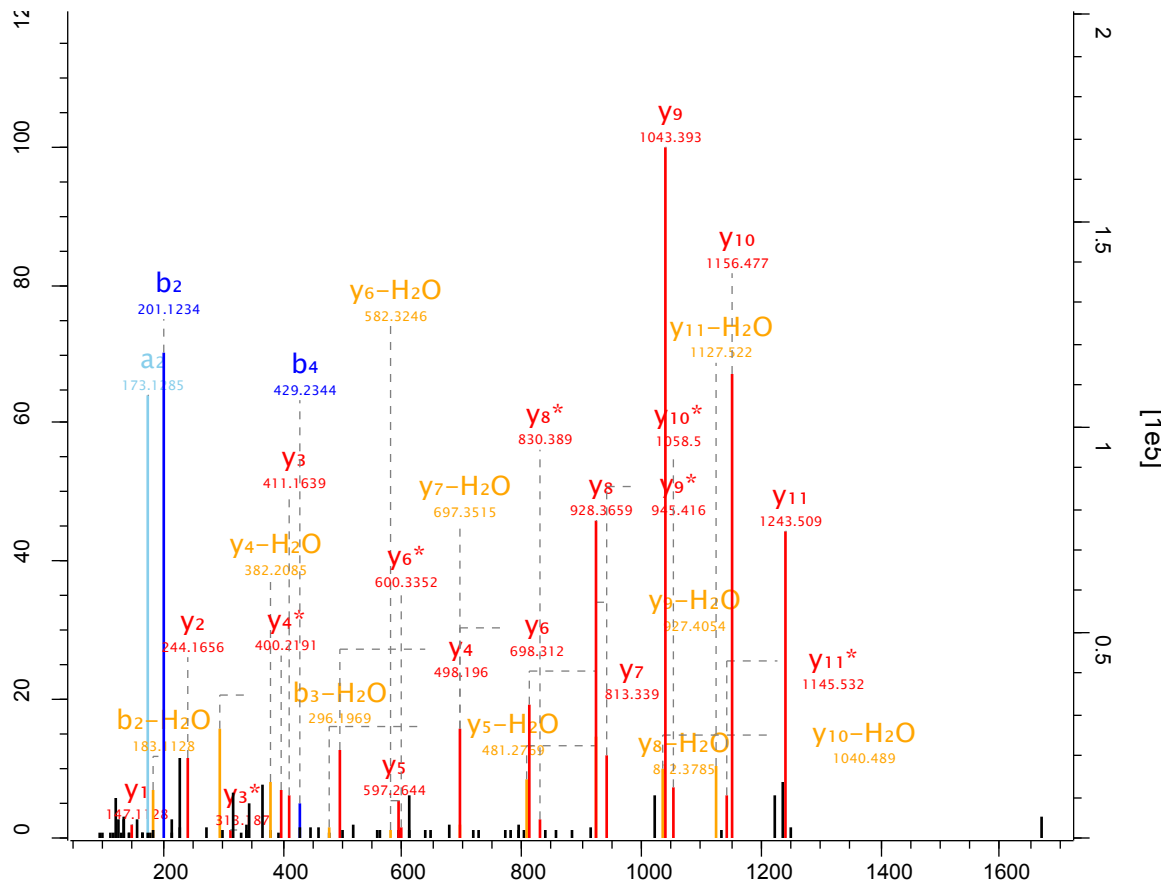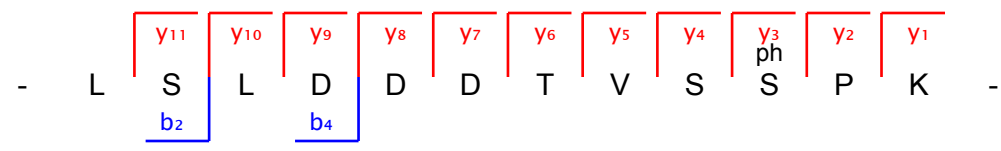

| Raw file                      | Scan | Method    | Score | m/z    |
|-------------------------------|------|-----------|-------|--------|
| 2013_COL15_34_38_151128201608 | 1822 | FTMS; HCD | 63.18 | 424.22 |

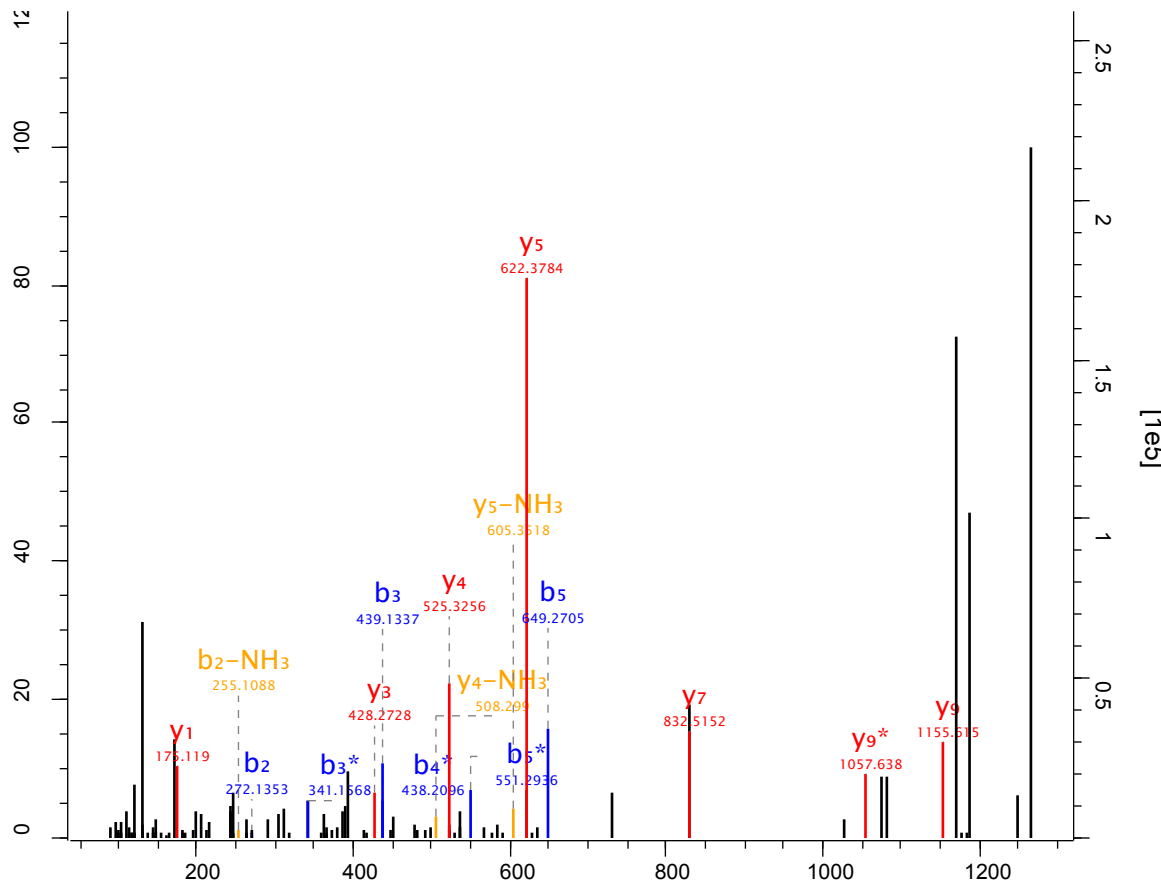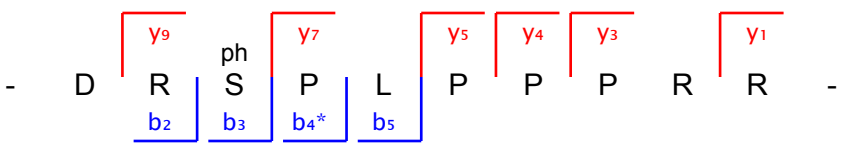

Raw file Scan Method Score m/z  
 2013\_COL15\_34\_38\_151128201608 1831 FTMS; HCD 129.54 455.54

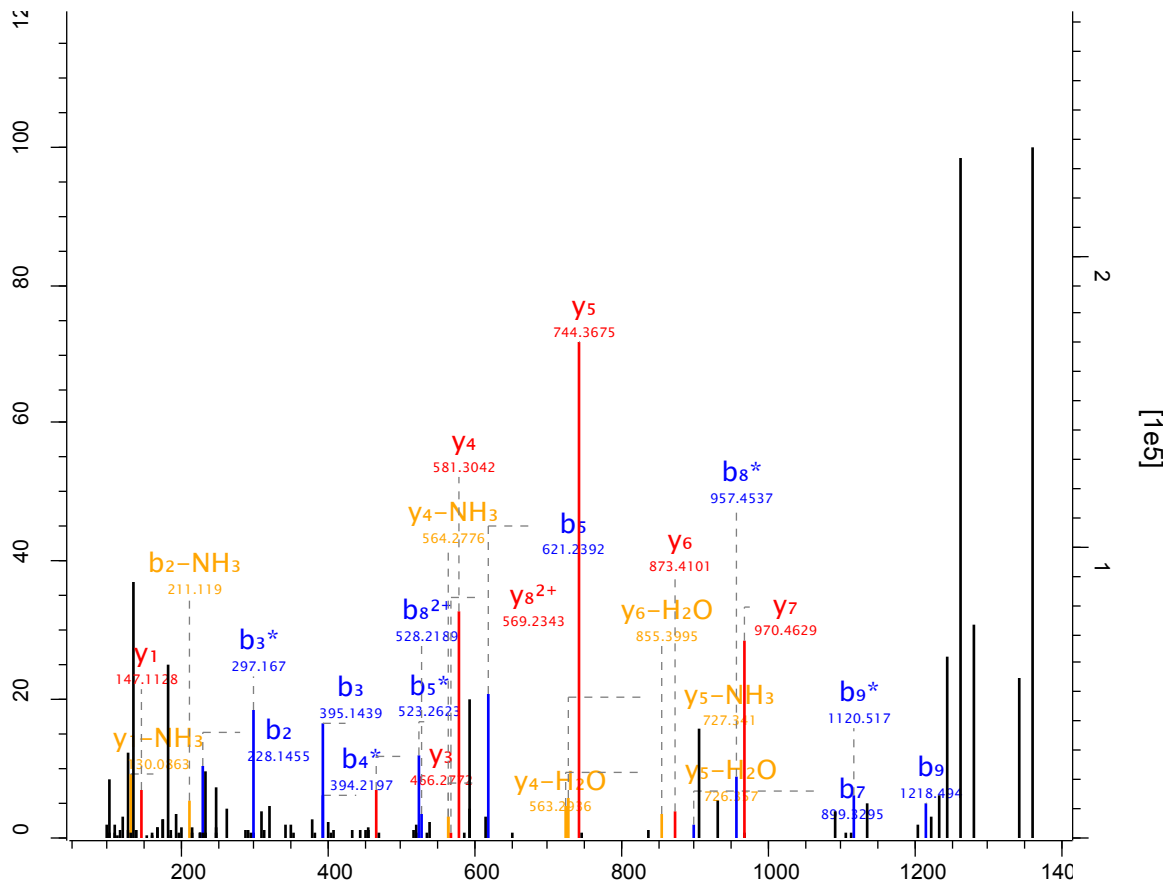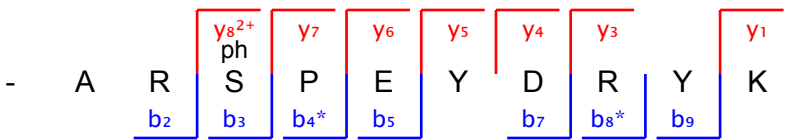

2013\_COL15\_34\_38\_151128201608

18461

FTMS; HCD

86.94

609.29

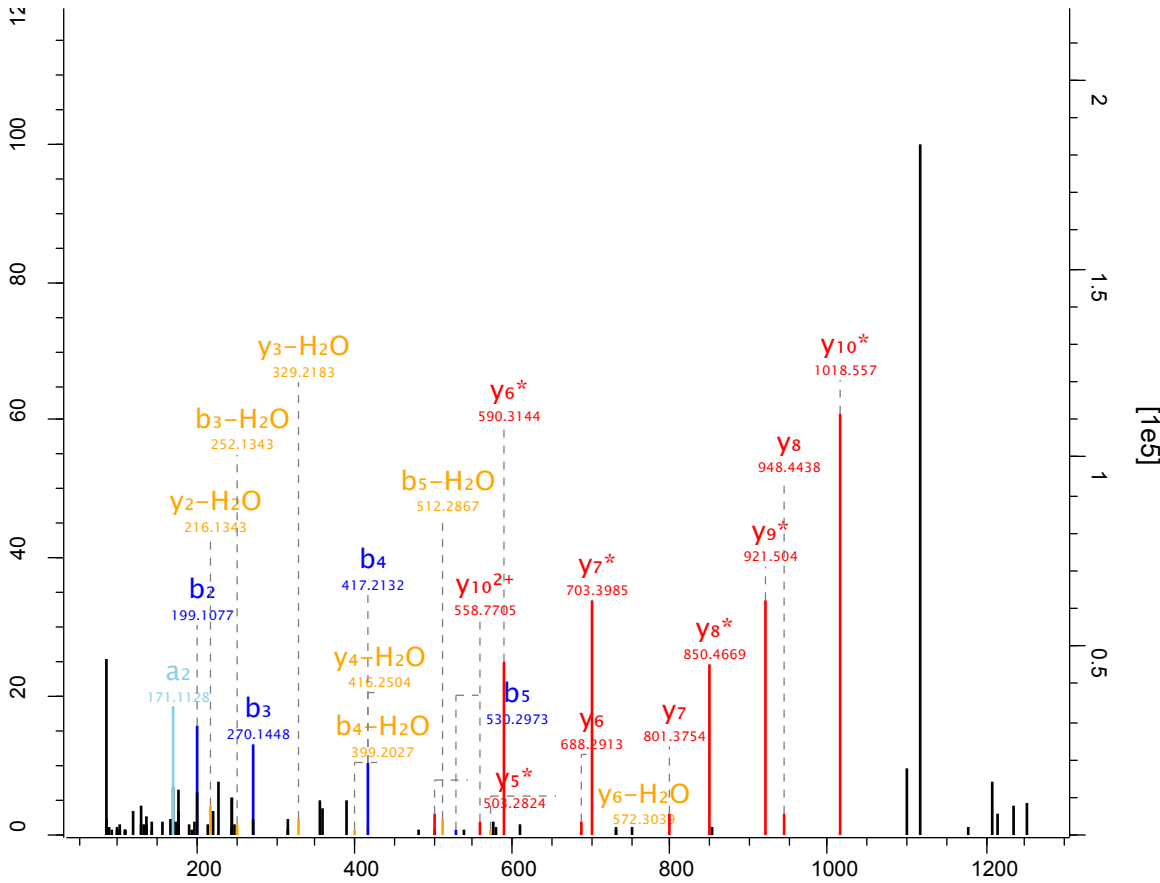

- T P A F L S S L S K -

y10\*
y9\*
y8
y7
y6
y5\*

b2
b3
b4
b5

ph

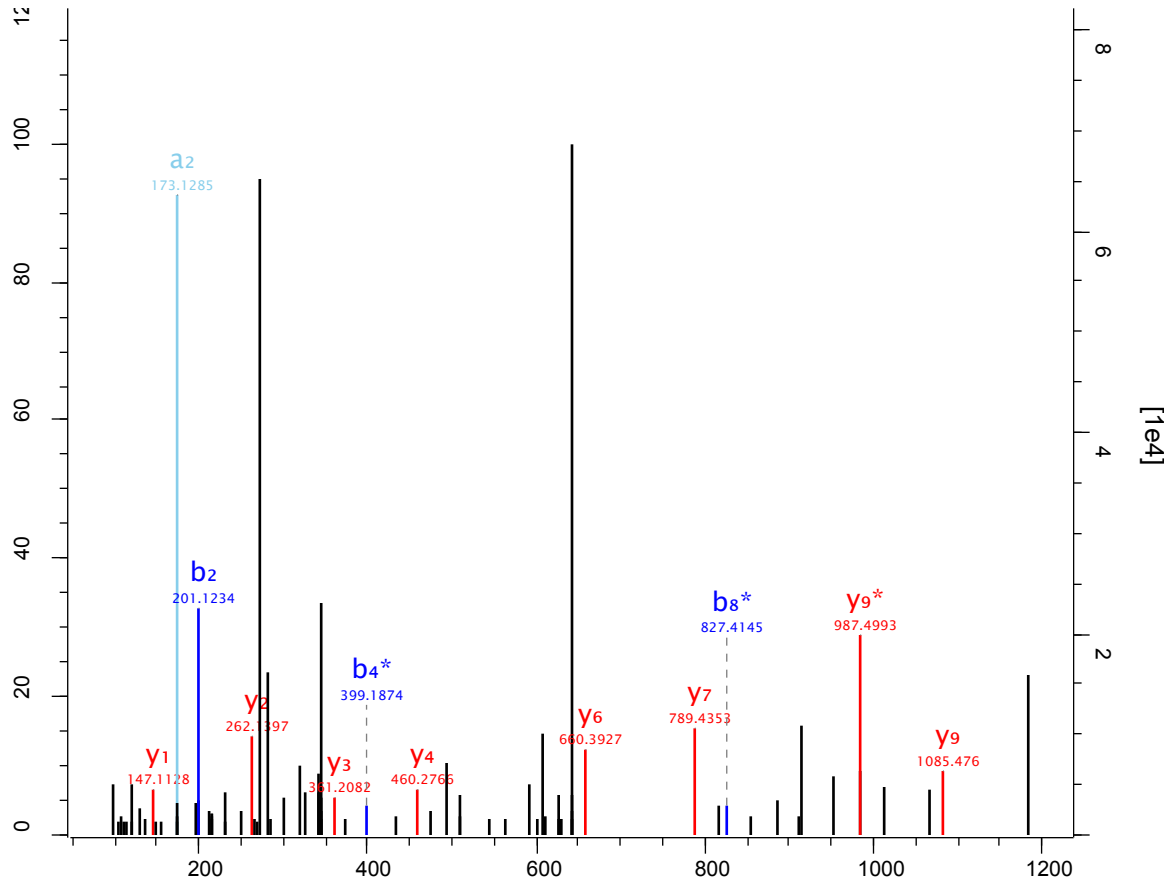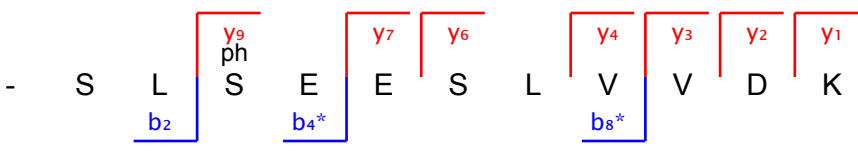



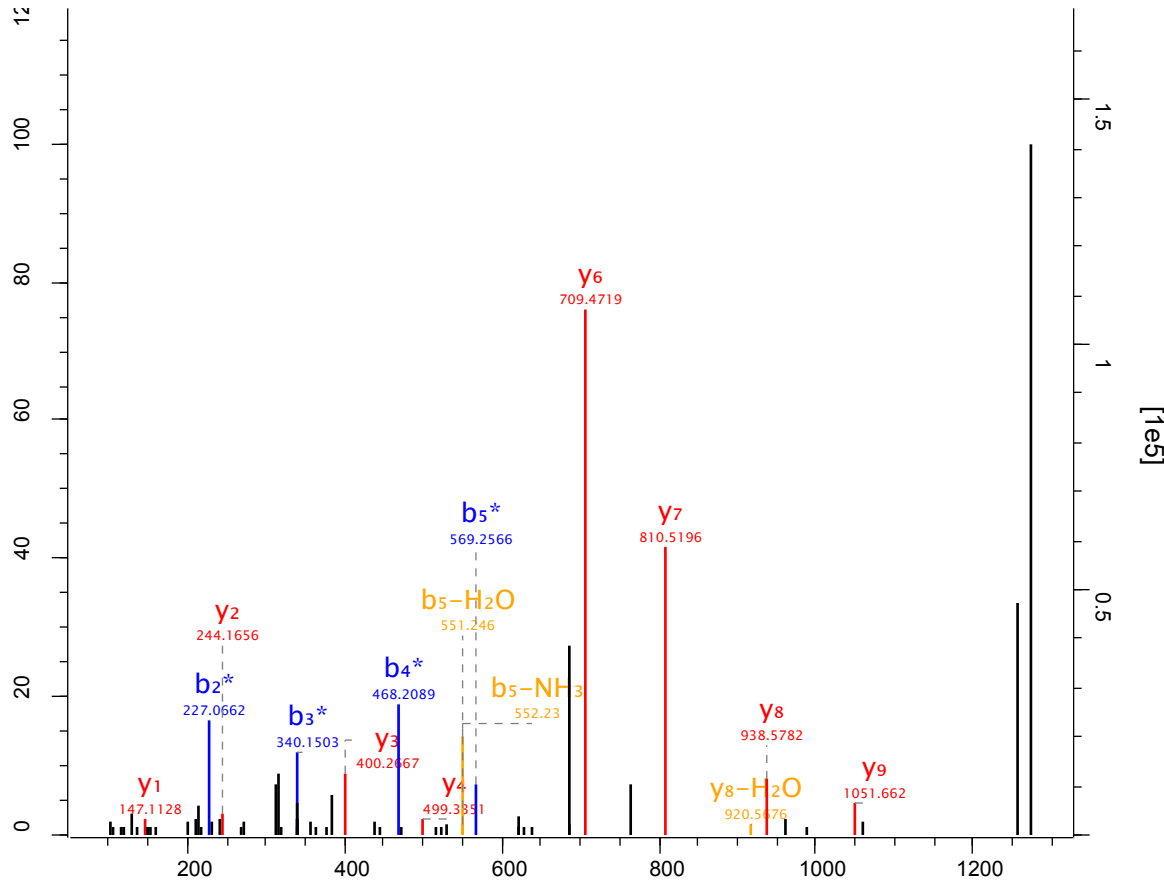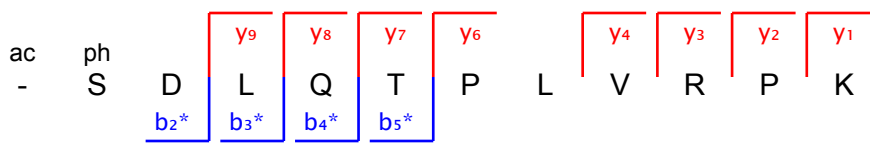

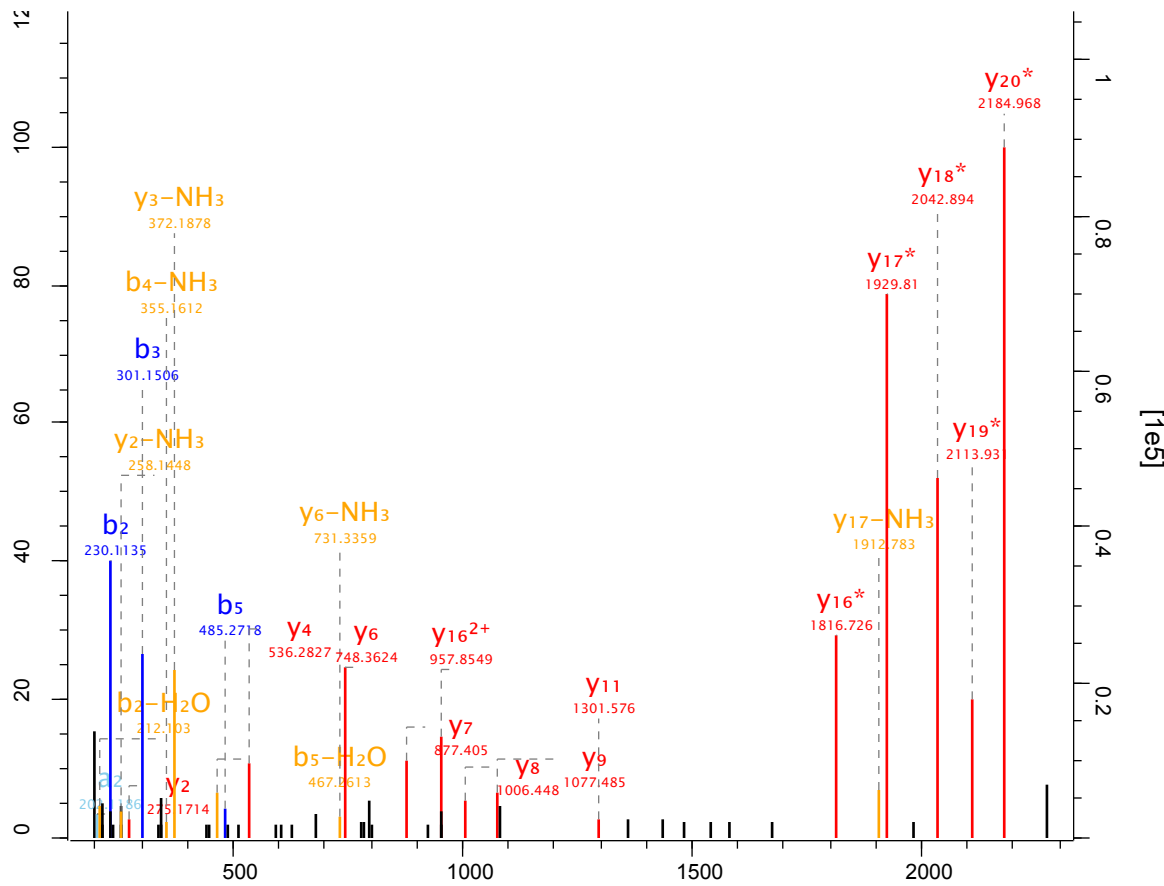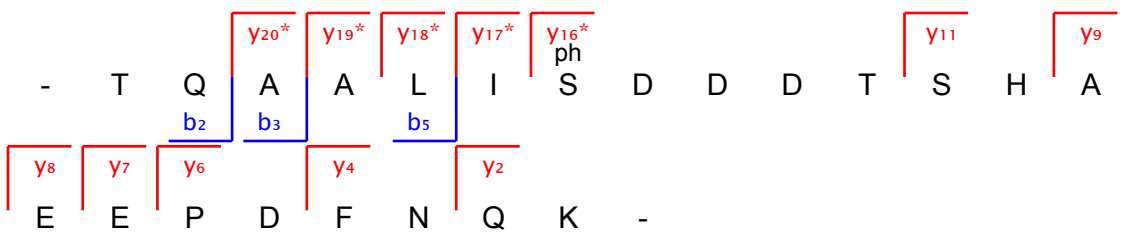

Raw file 2013\_COL15\_34\_38\_151128201608 Scan 1872 Method FTMS; HCD Score 61.49 m/z 563.24

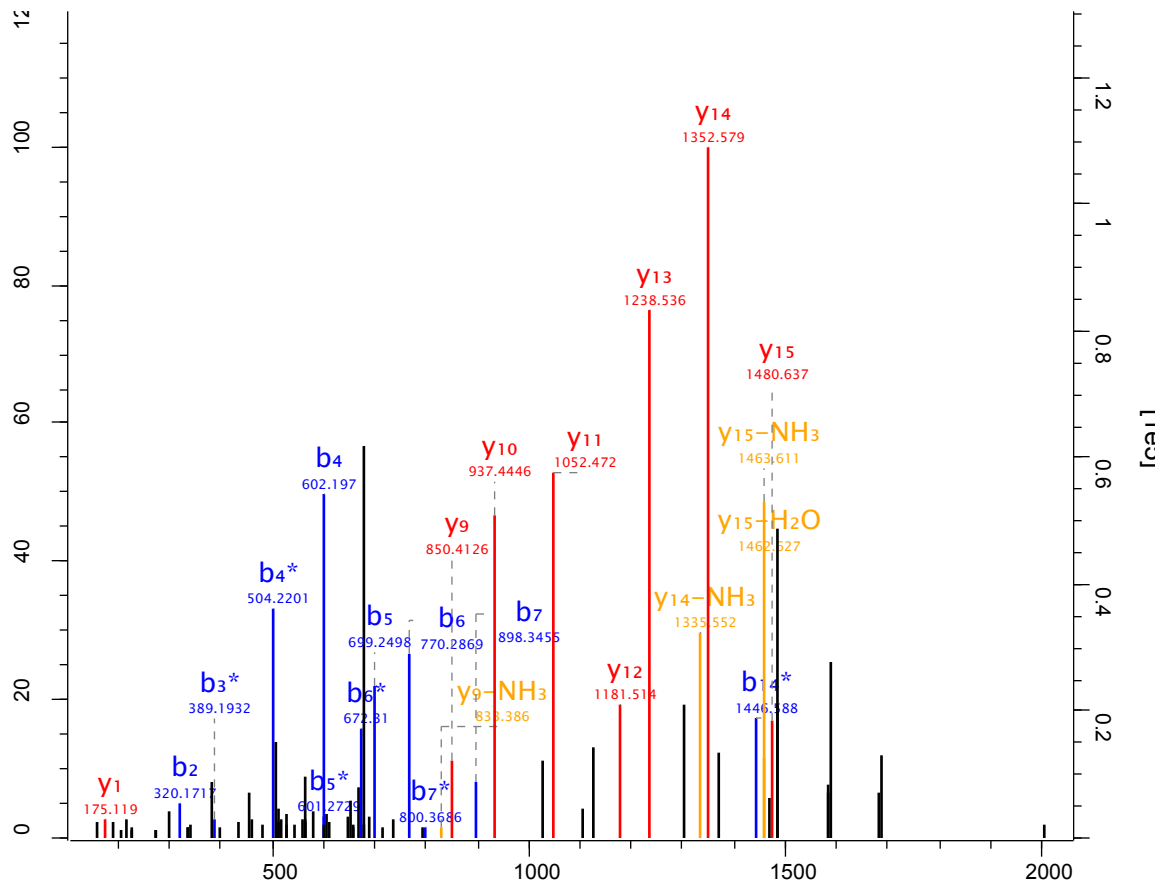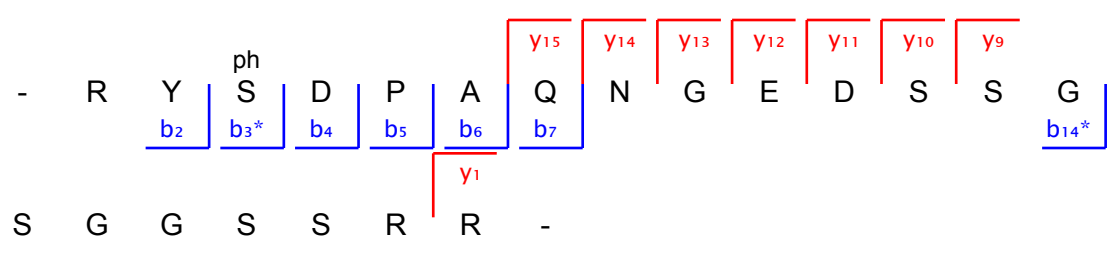

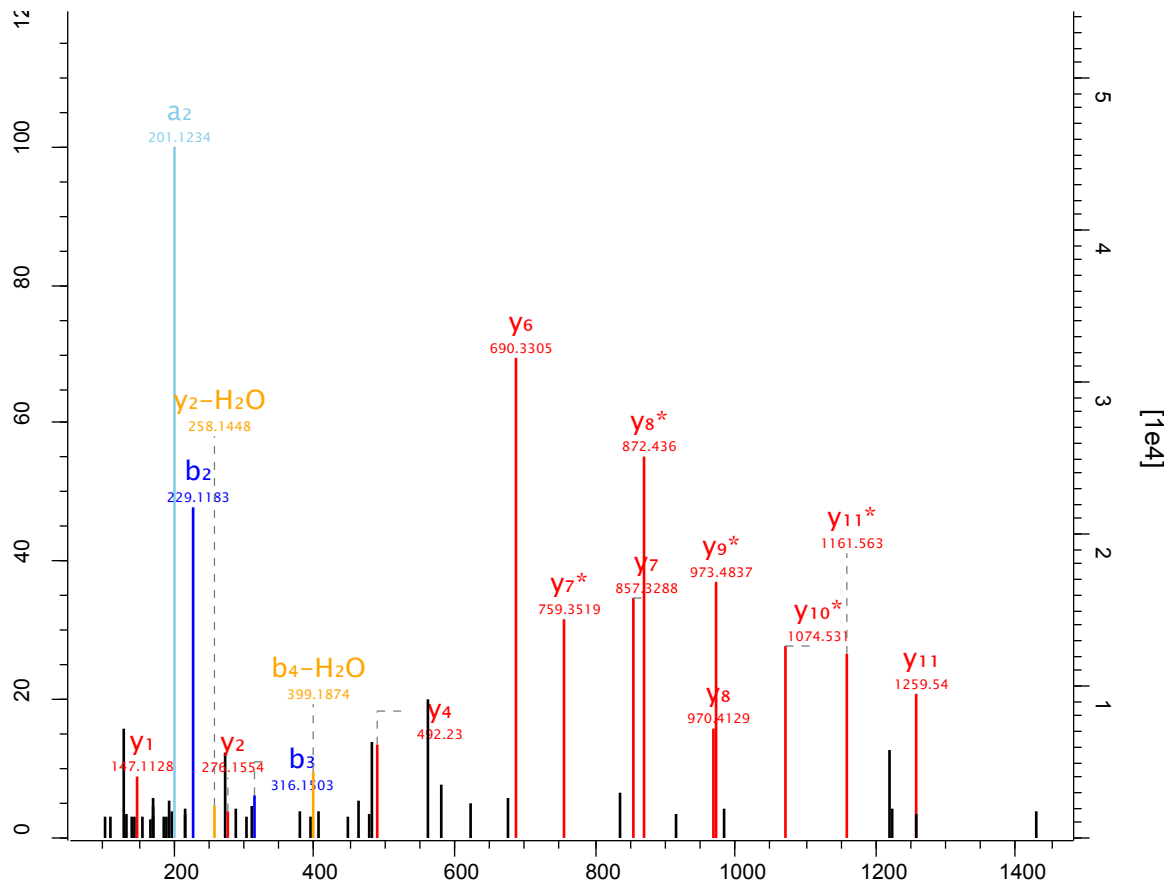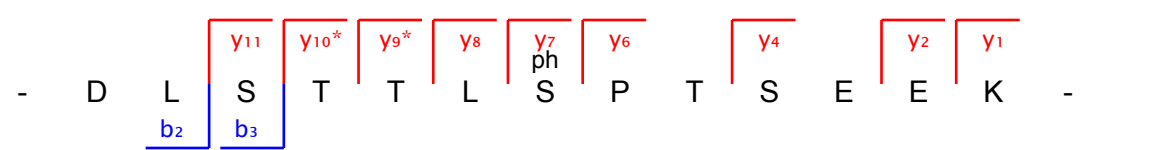



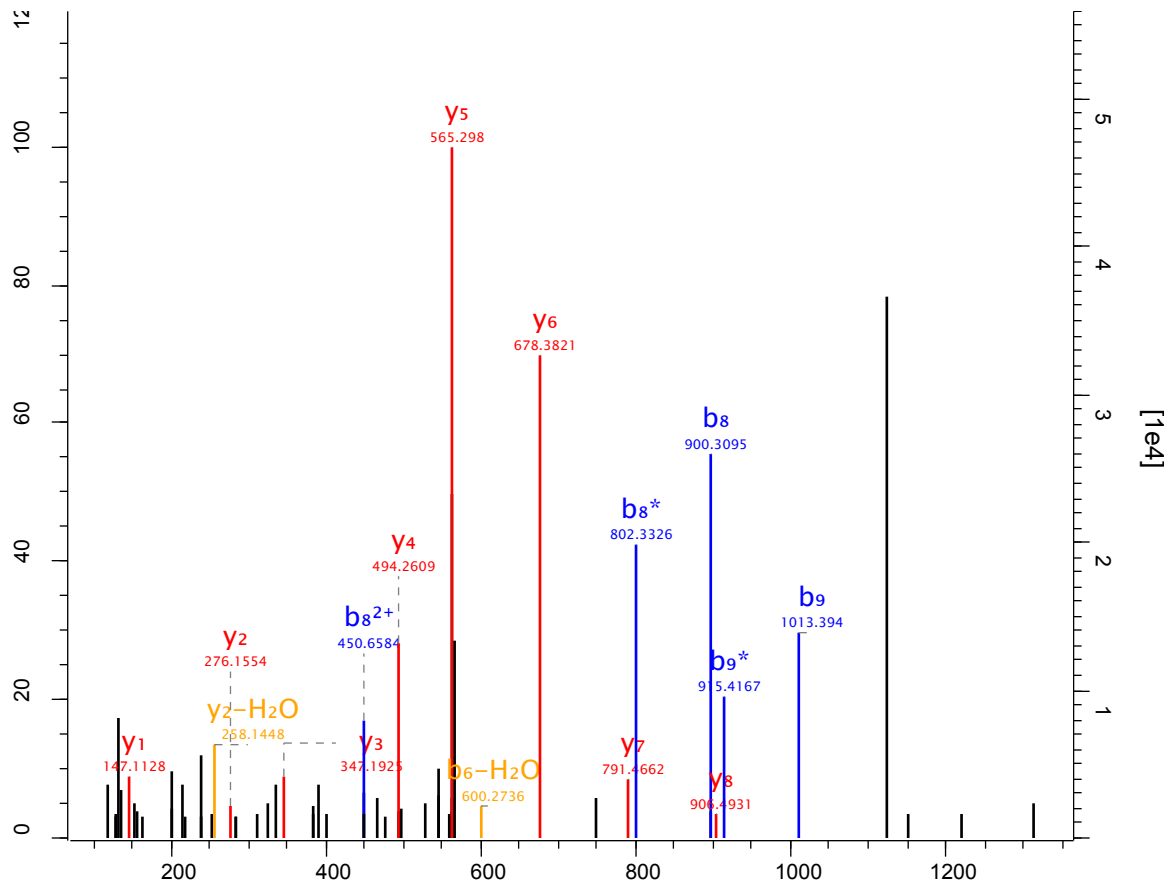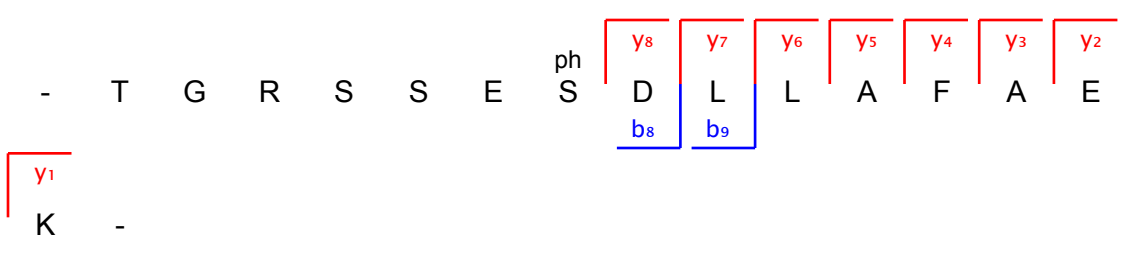

2013\_COL15\_34\_38\_151128201608

19043

FTMS; HCD

61.41

605.3

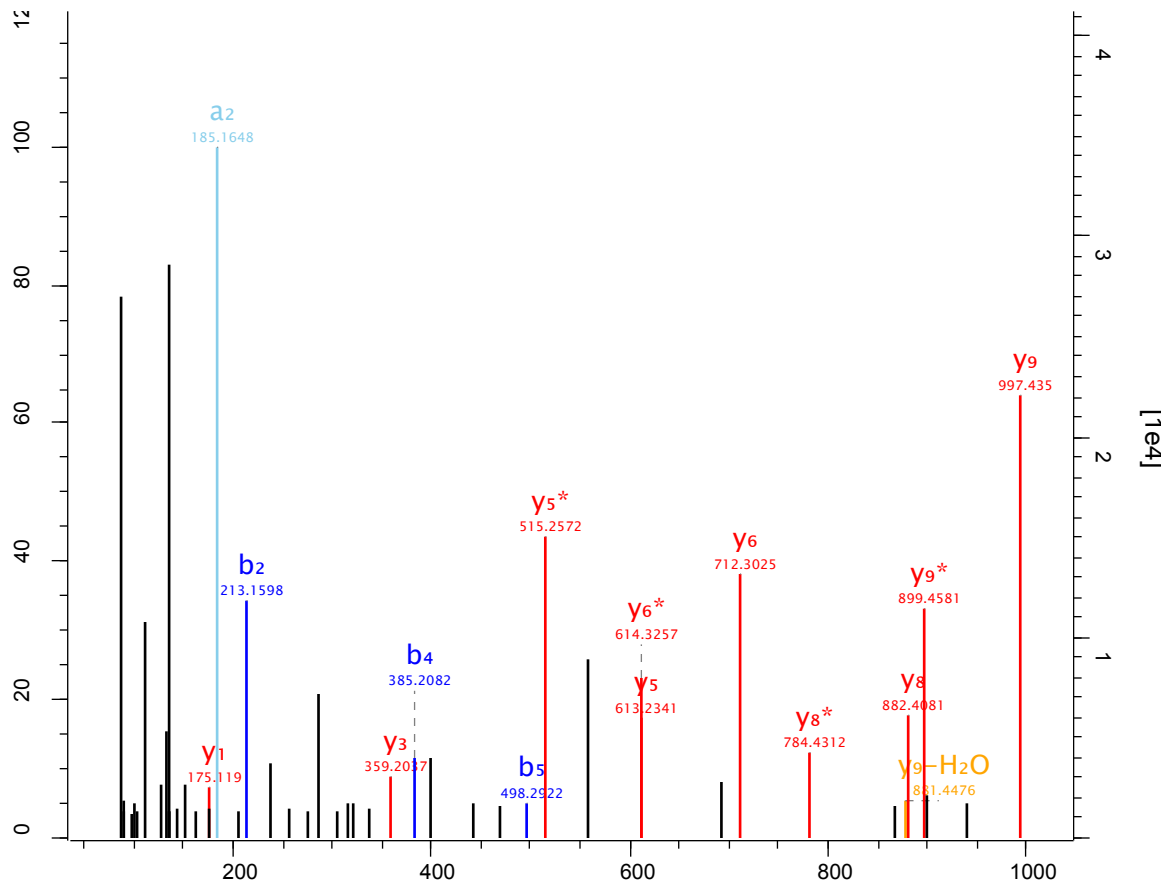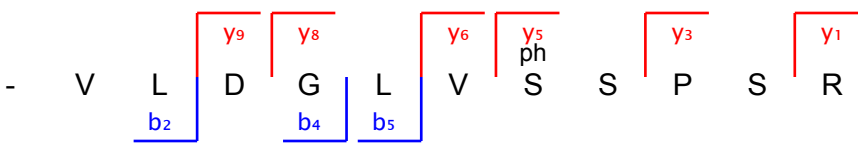

2013\_COL15\_34\_38\_151128201608

19049

FTMS; HCD

43.59

633.97

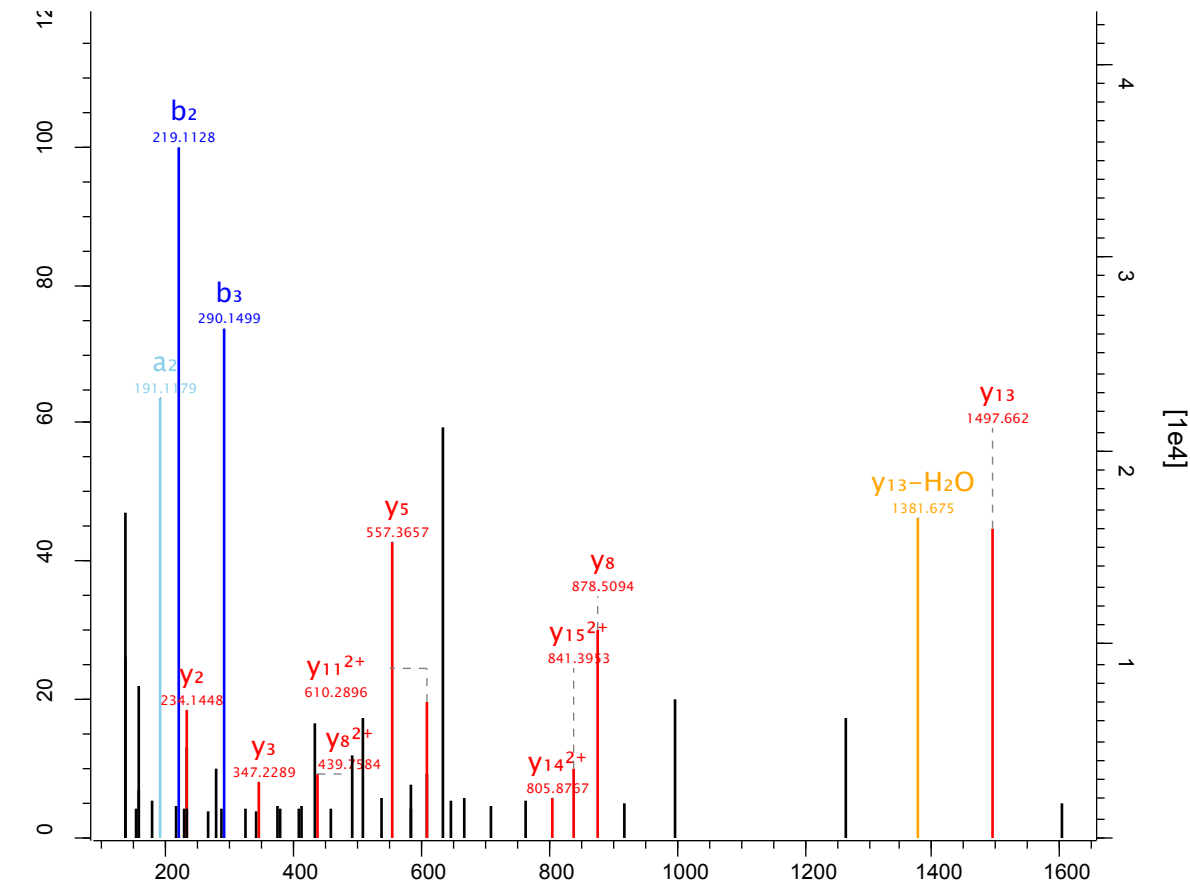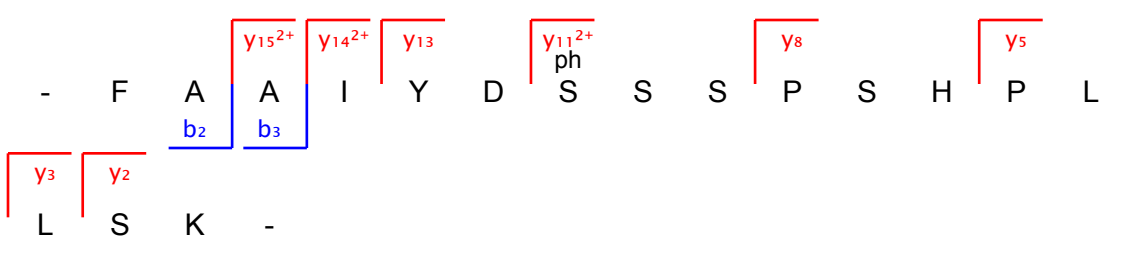



| Raw file                      | Scan  | Method    | Score | m/z    |
|-------------------------------|-------|-----------|-------|--------|
| 2013_COL15_34_38_151128201608 | 19093 | FTMS; HCD | 44.39 | 848.87 |

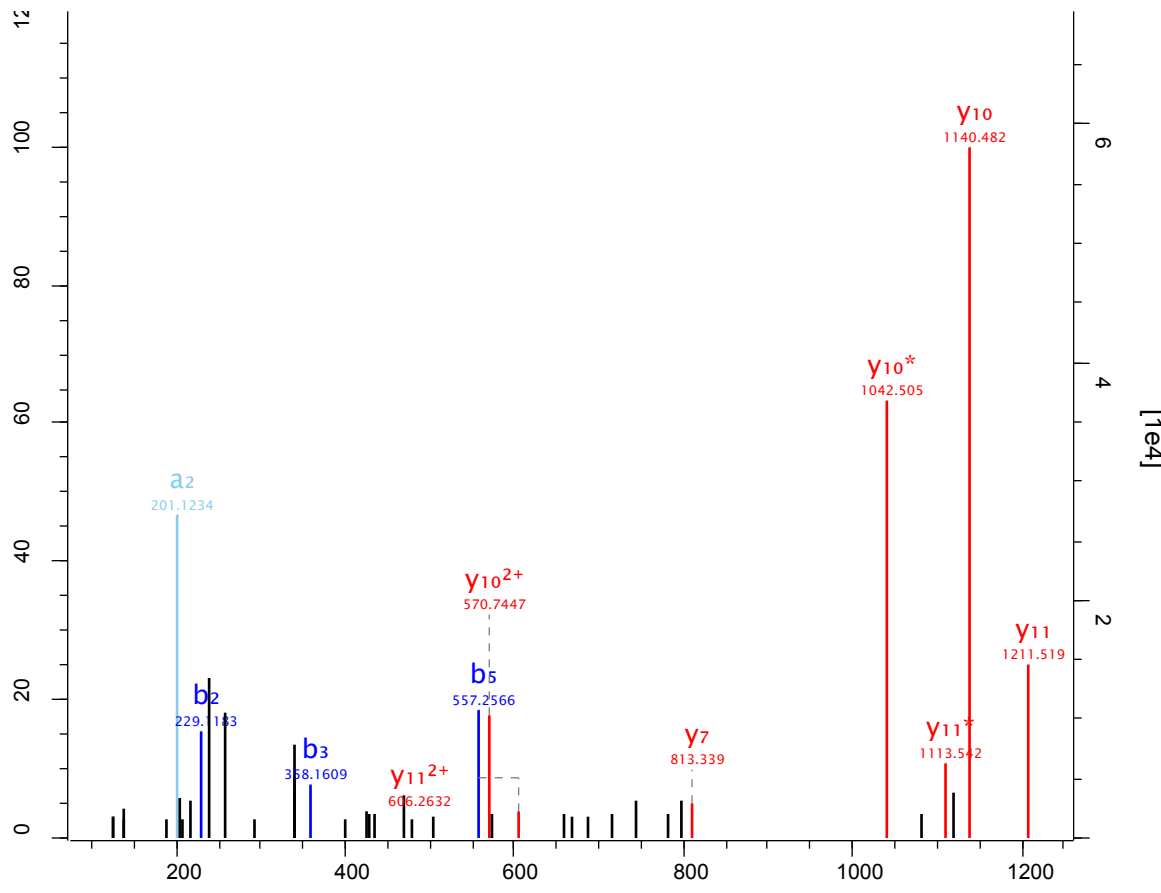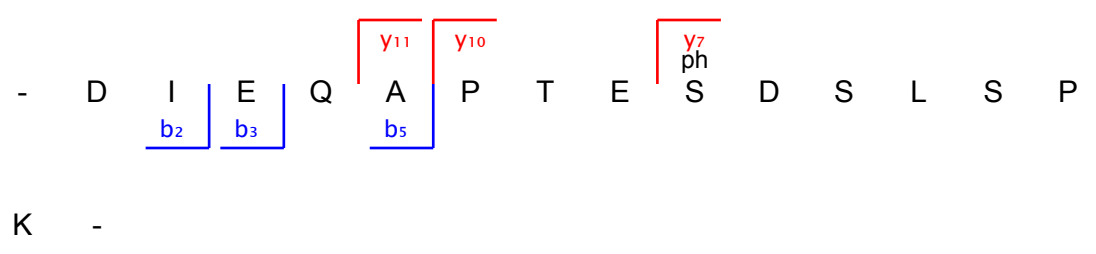

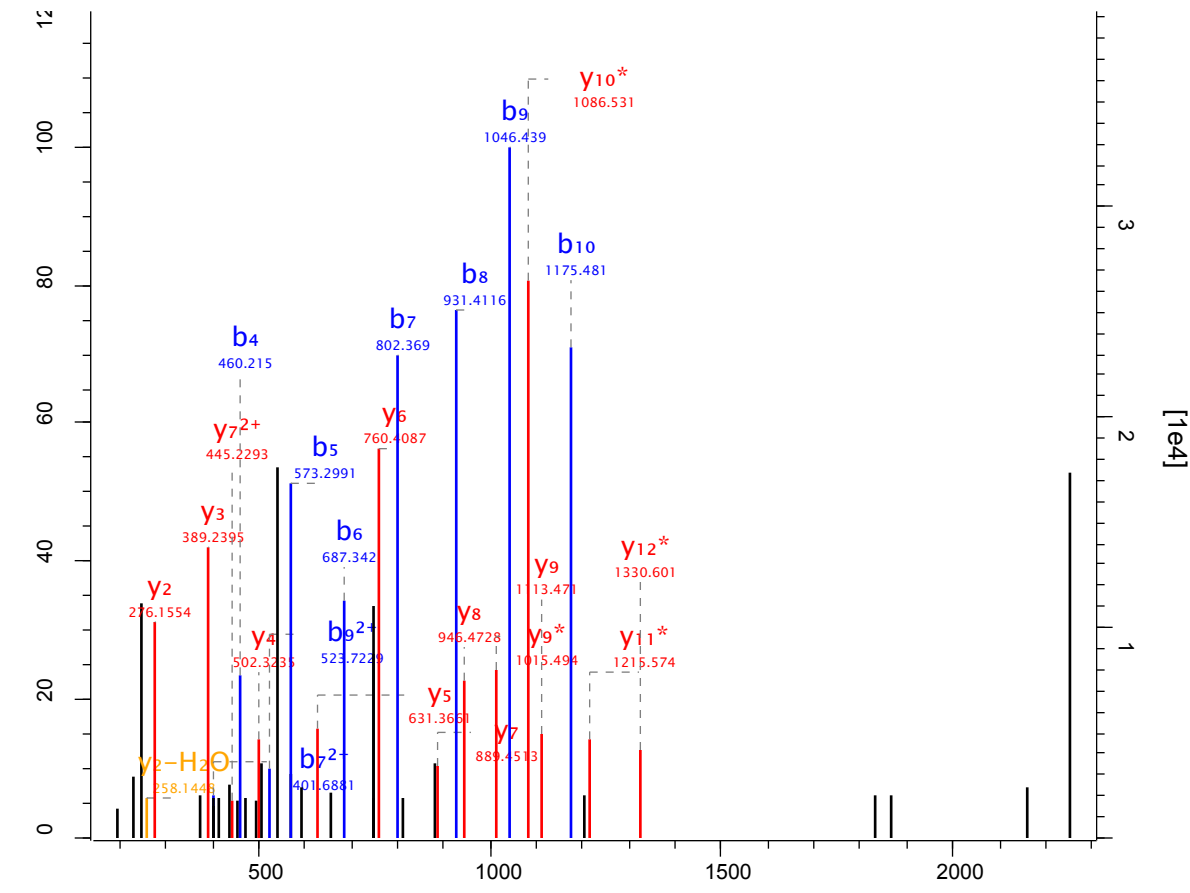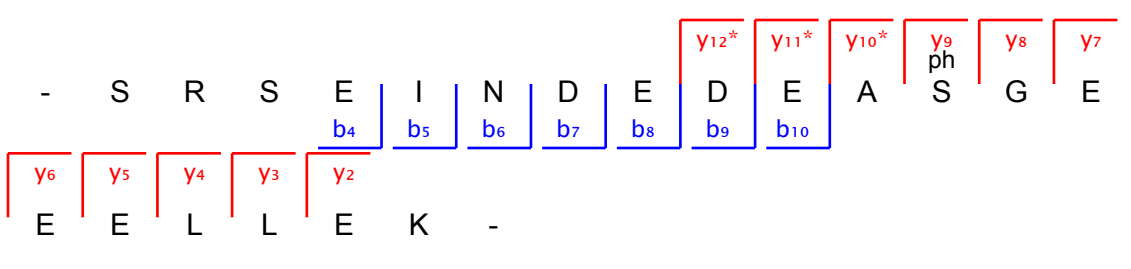

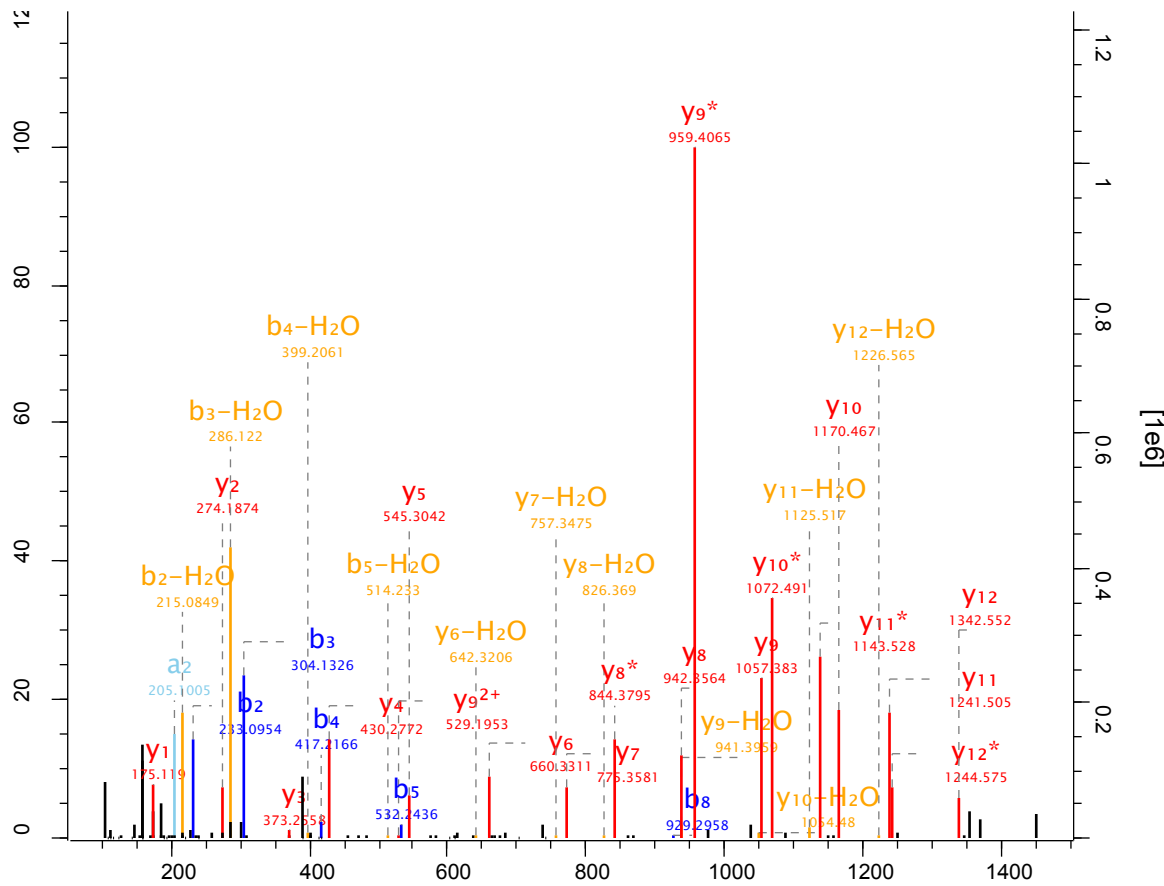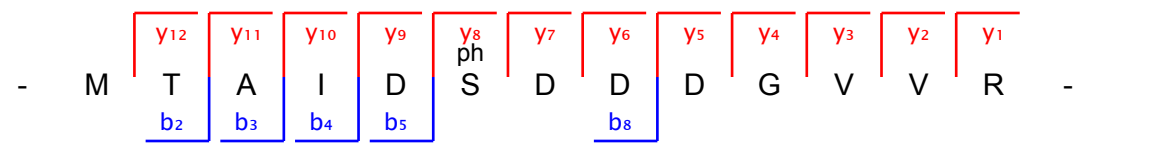

2013\_COL15\_34\_38\_151128201608

19410

FTMS; HCD

61.41

691.34

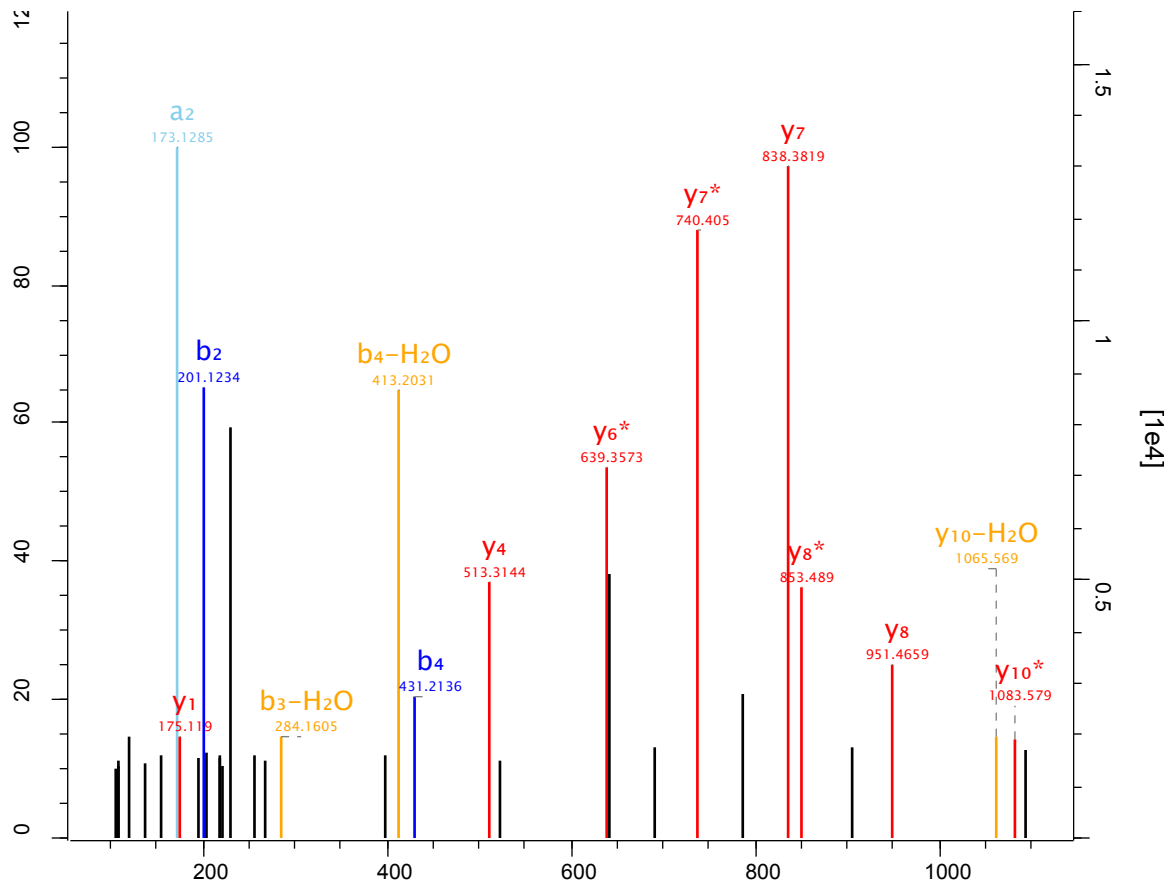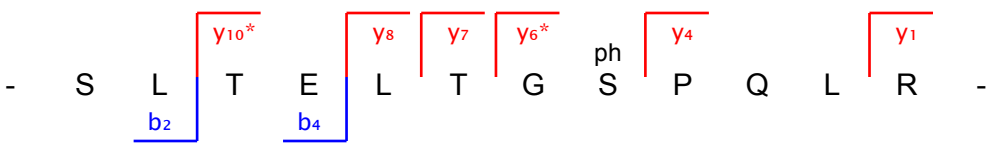

2013\_COL15\_34\_38\_151128201608

19459

FTMS; HCD

128.95

653.33

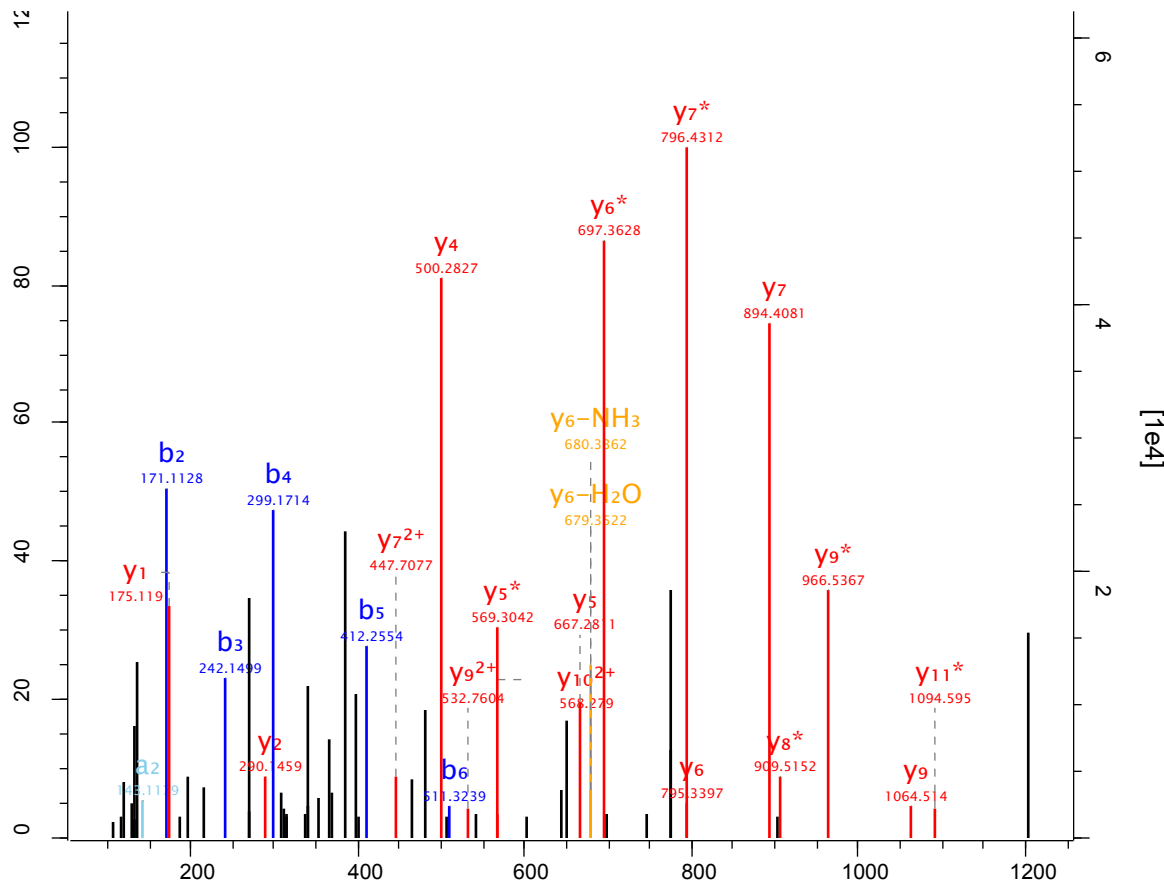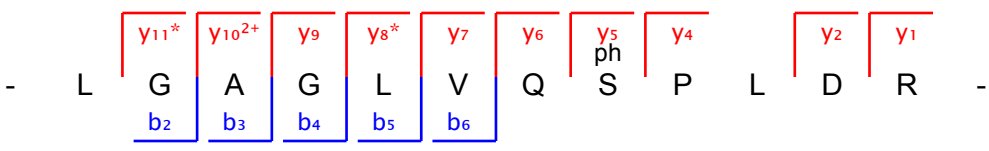

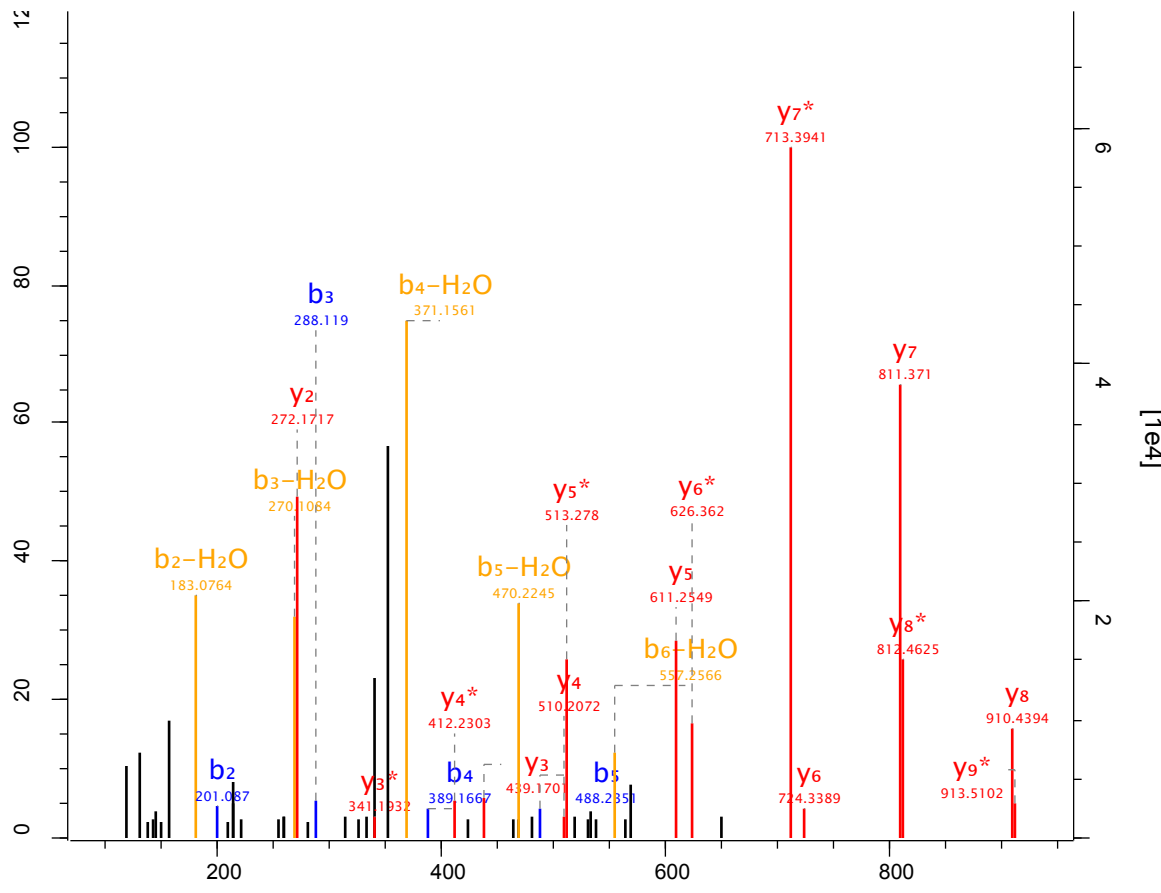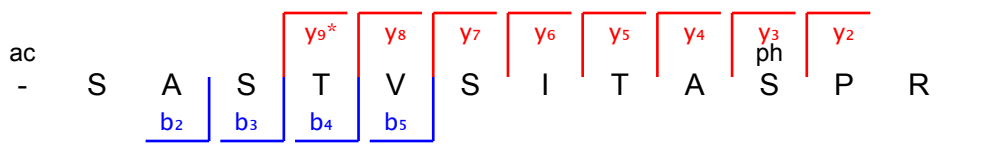

Raw file Scan Method Score m/z  
 2013\_COL15\_34\_38\_151128201608 19835 FTMS; HCD 89.62 757.31

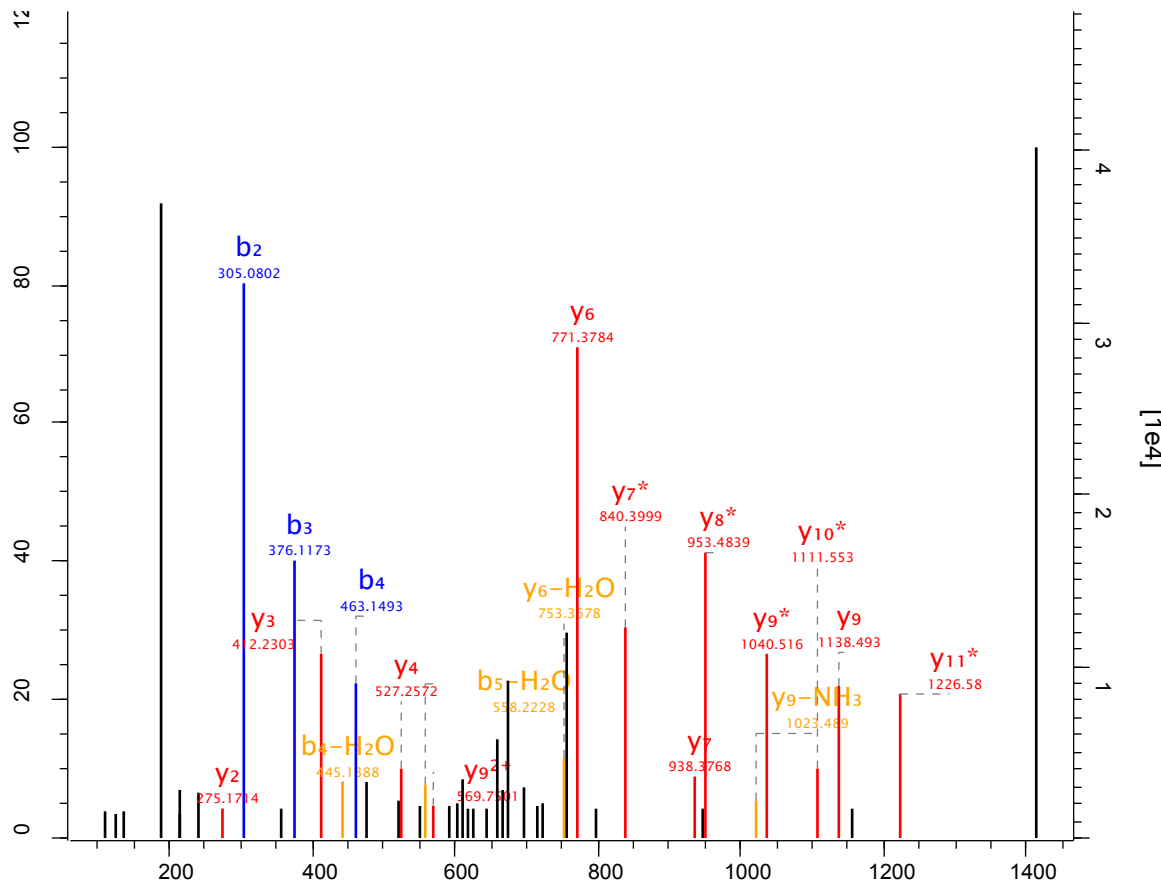

ac ox M y11\* y10\* y9 y8\* y7 y6 F y4 y3 y2 K -

D A S L S P D H Q

b2 b3 b4

Raw file 2013\_COL15\_34\_38\_151128201608 Scan 19995 Method FTMS; HCD Score 47.68 m/z 764.84

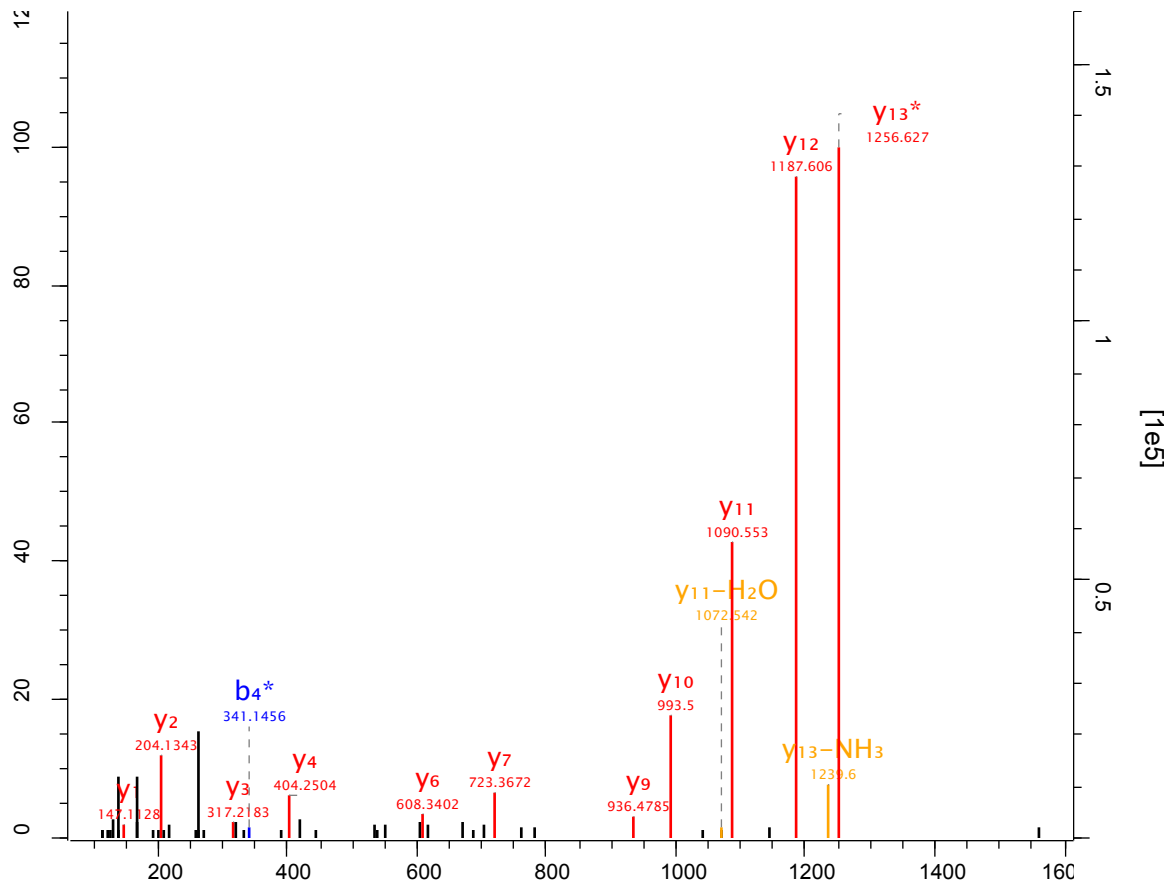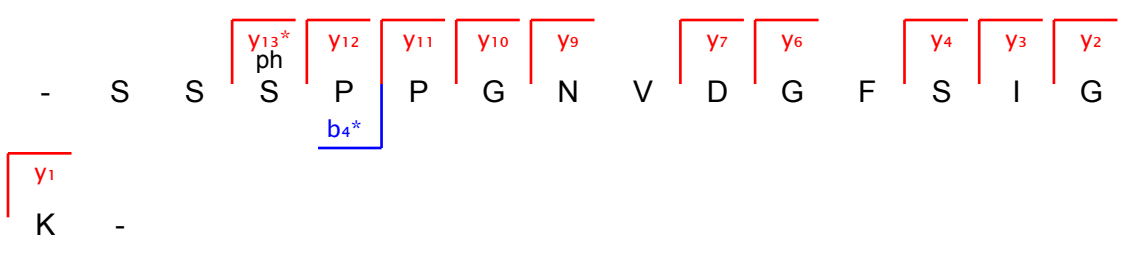



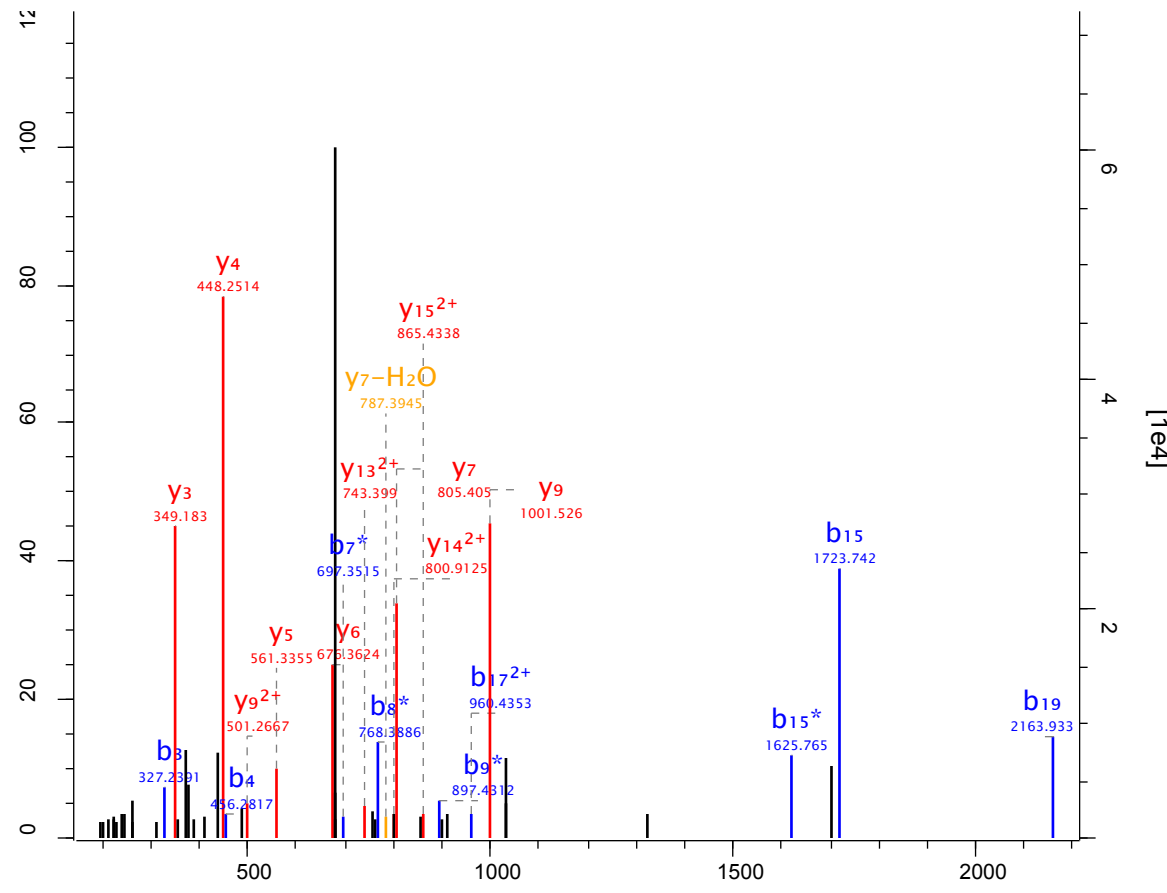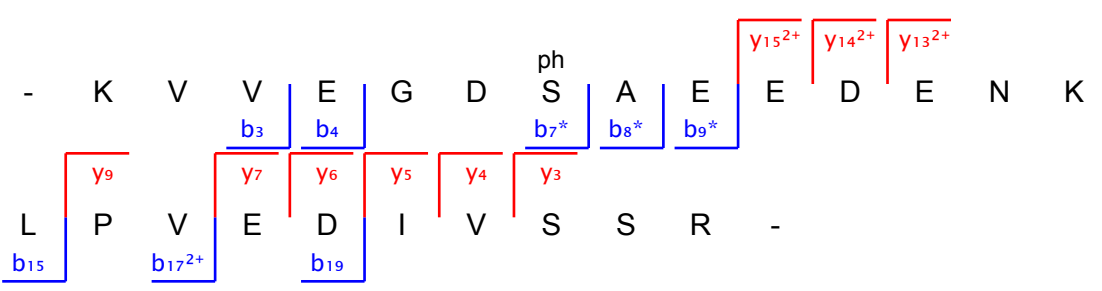

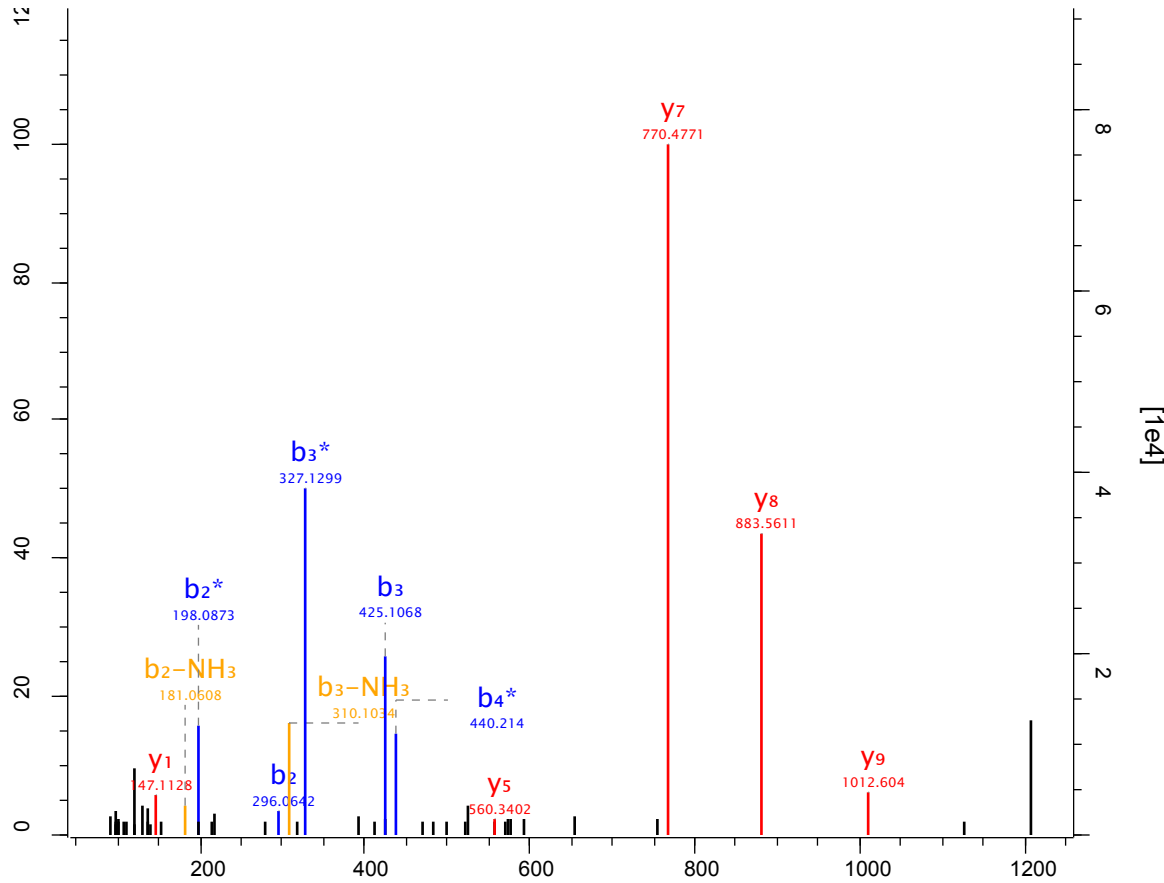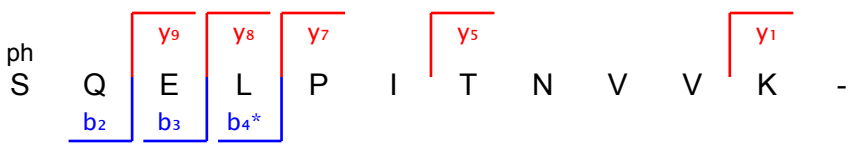

Raw file 2013\_COL15\_34\_38\_151128201608 Scan 20472 Method FTMS; HCD Score 66.15 m/z 866.89

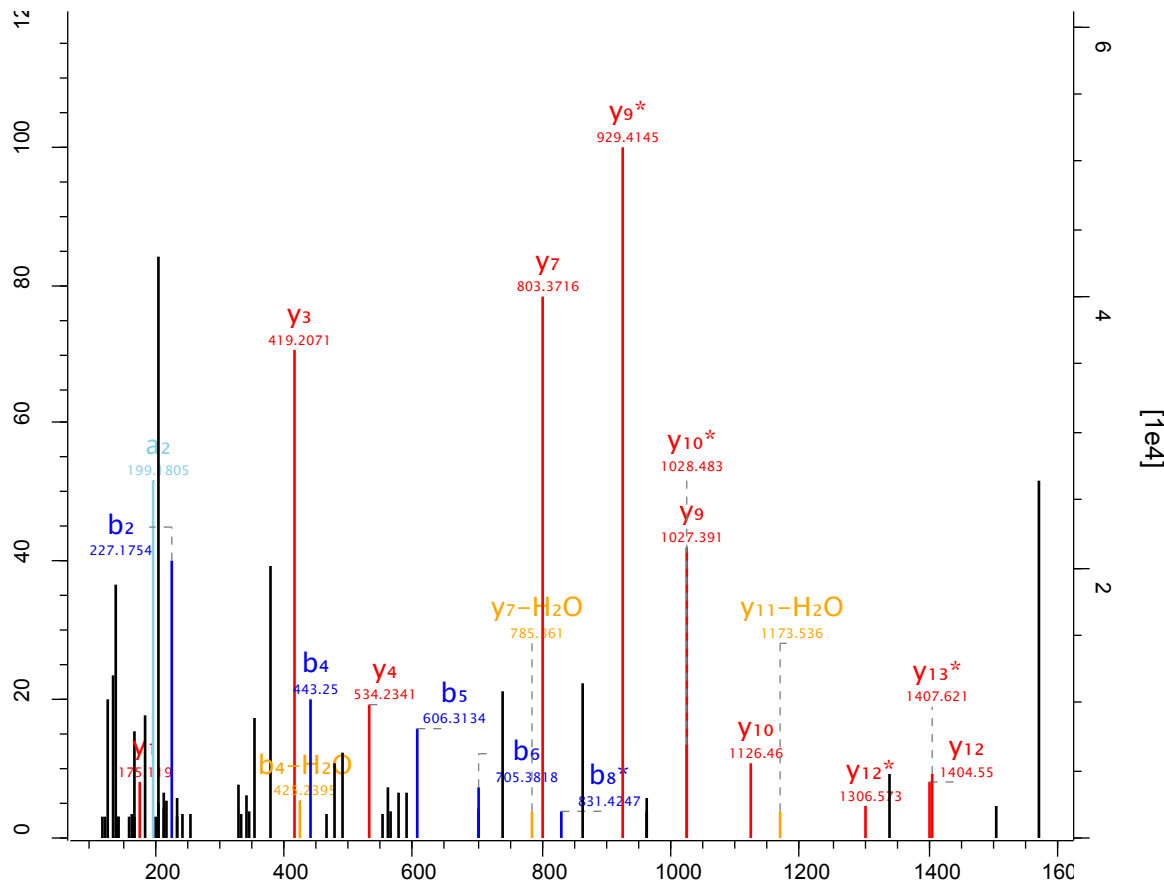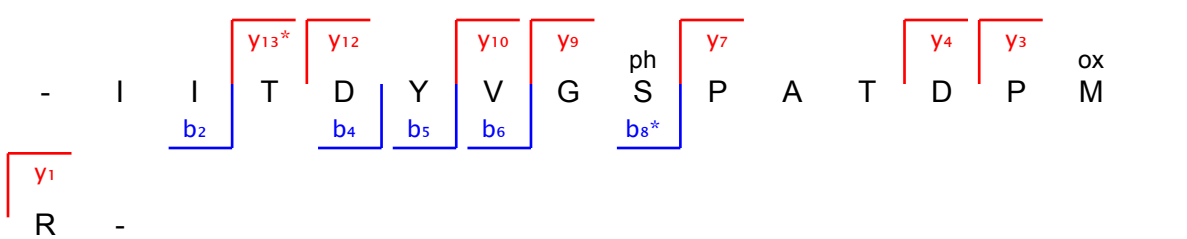

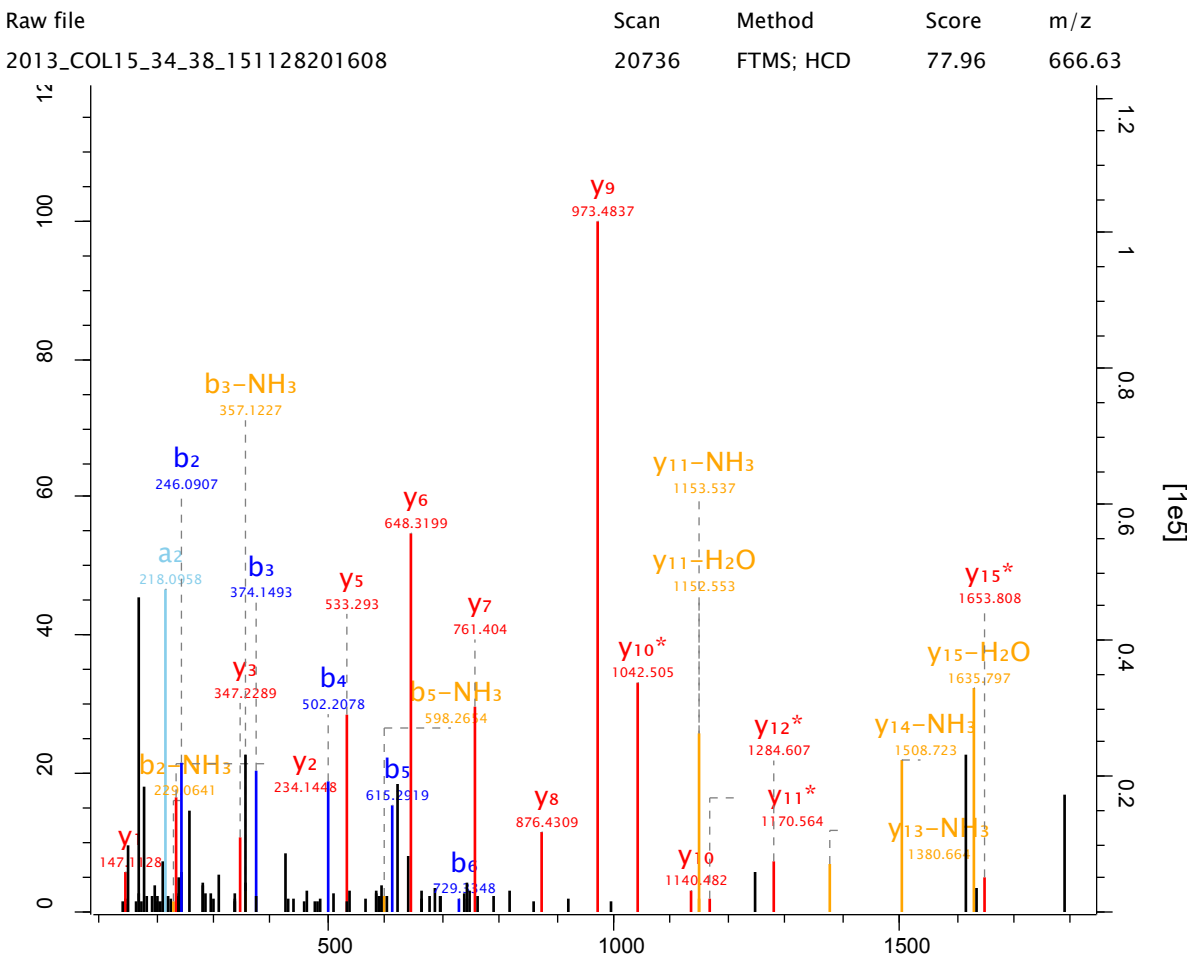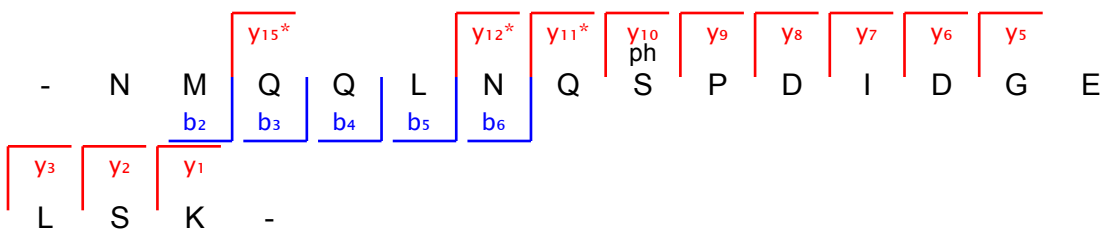

Raw file 2013\_COL15\_34\_38\_151128201608 Scan 20785 Method FTMS; HCD Score 76.3 m/z 848.9

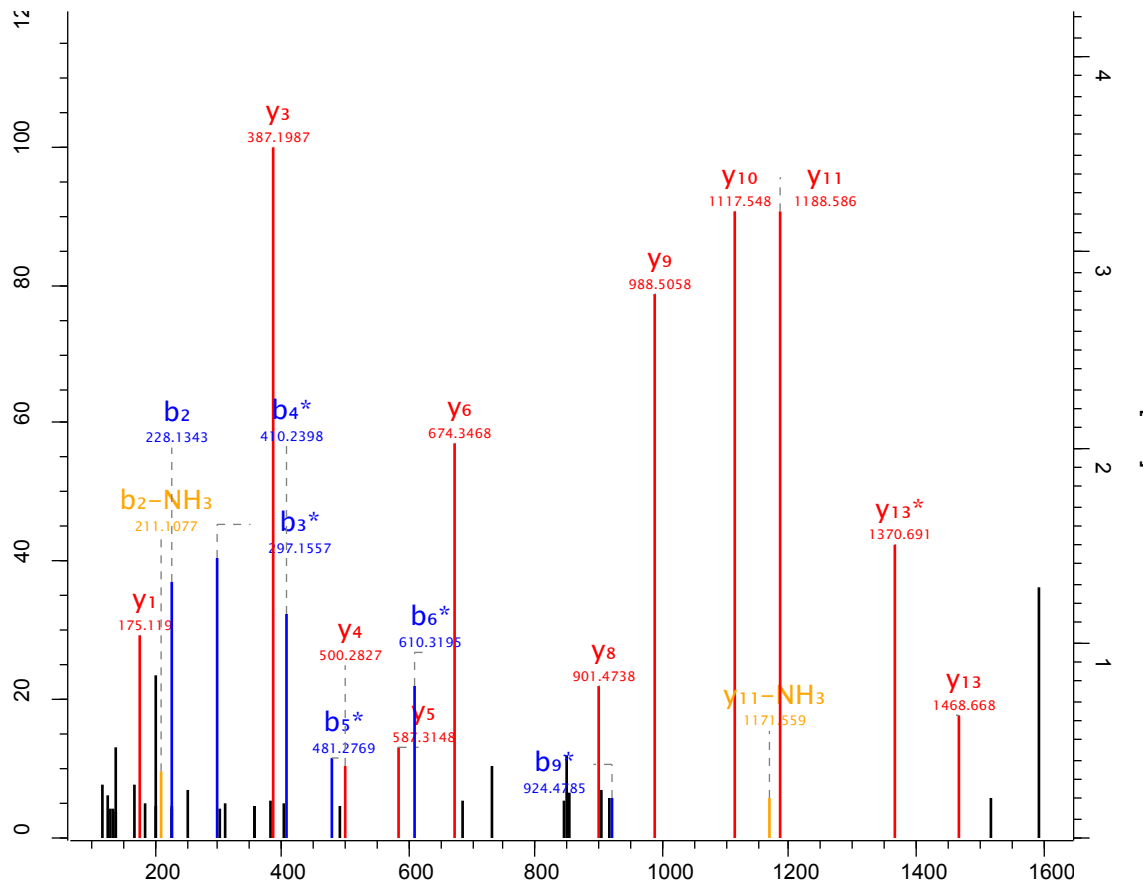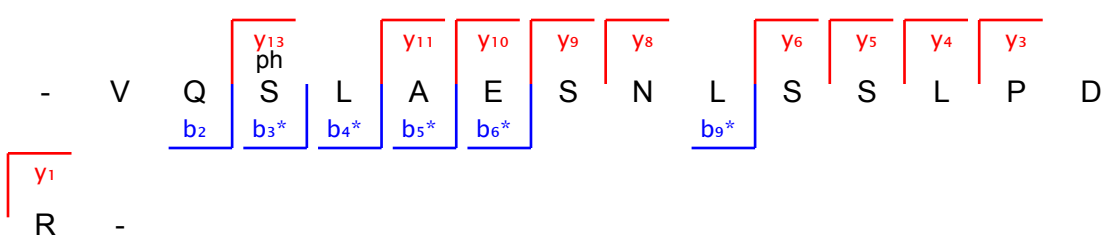

2013\_COL15\_34\_38\_151128201608

21160

FTMS; HCD

129.9

727.34

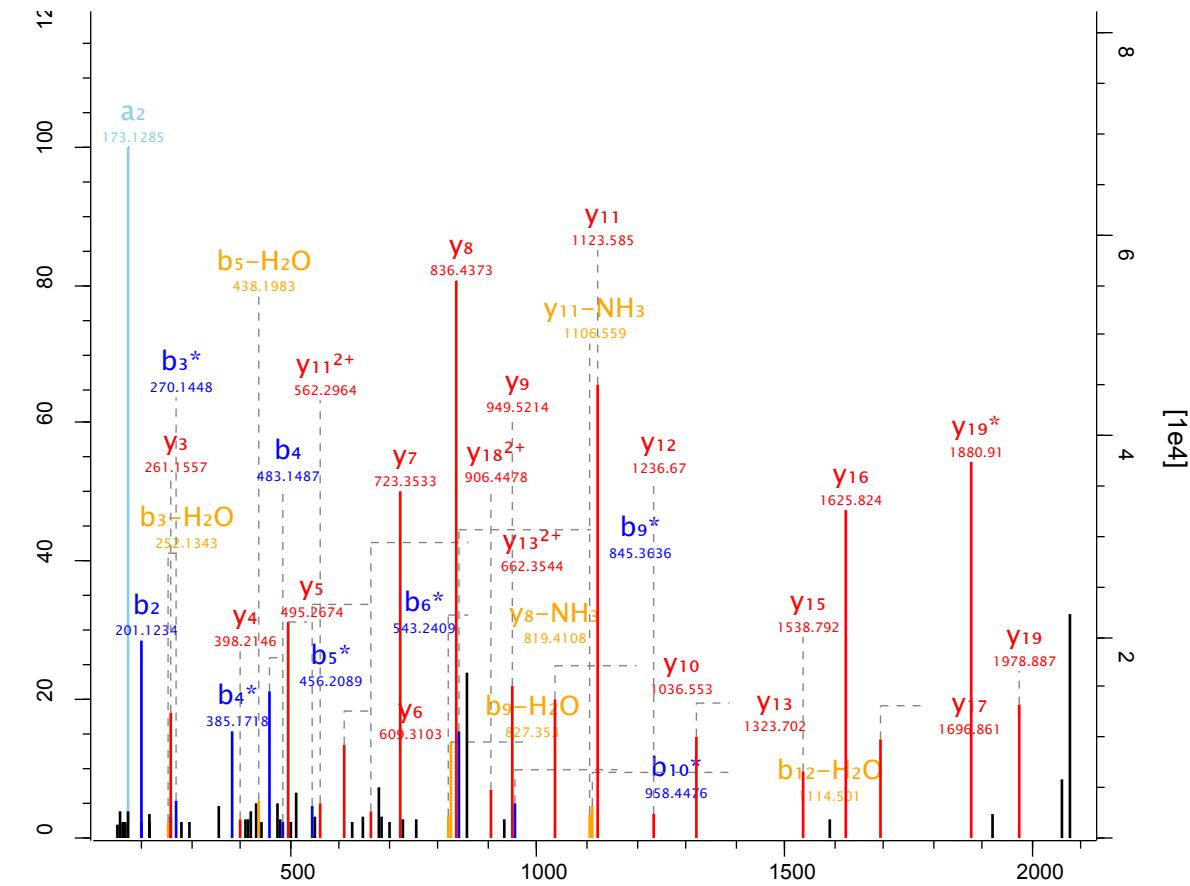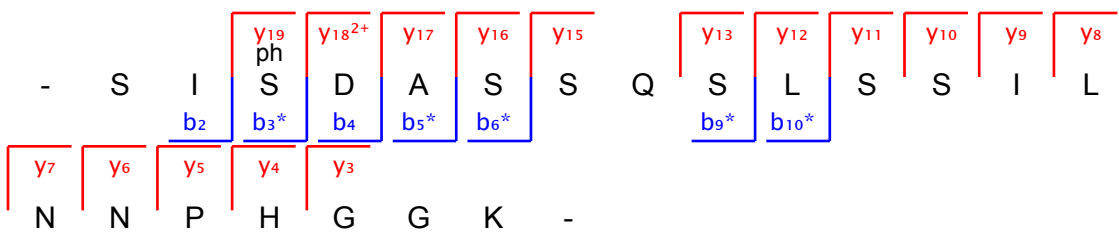

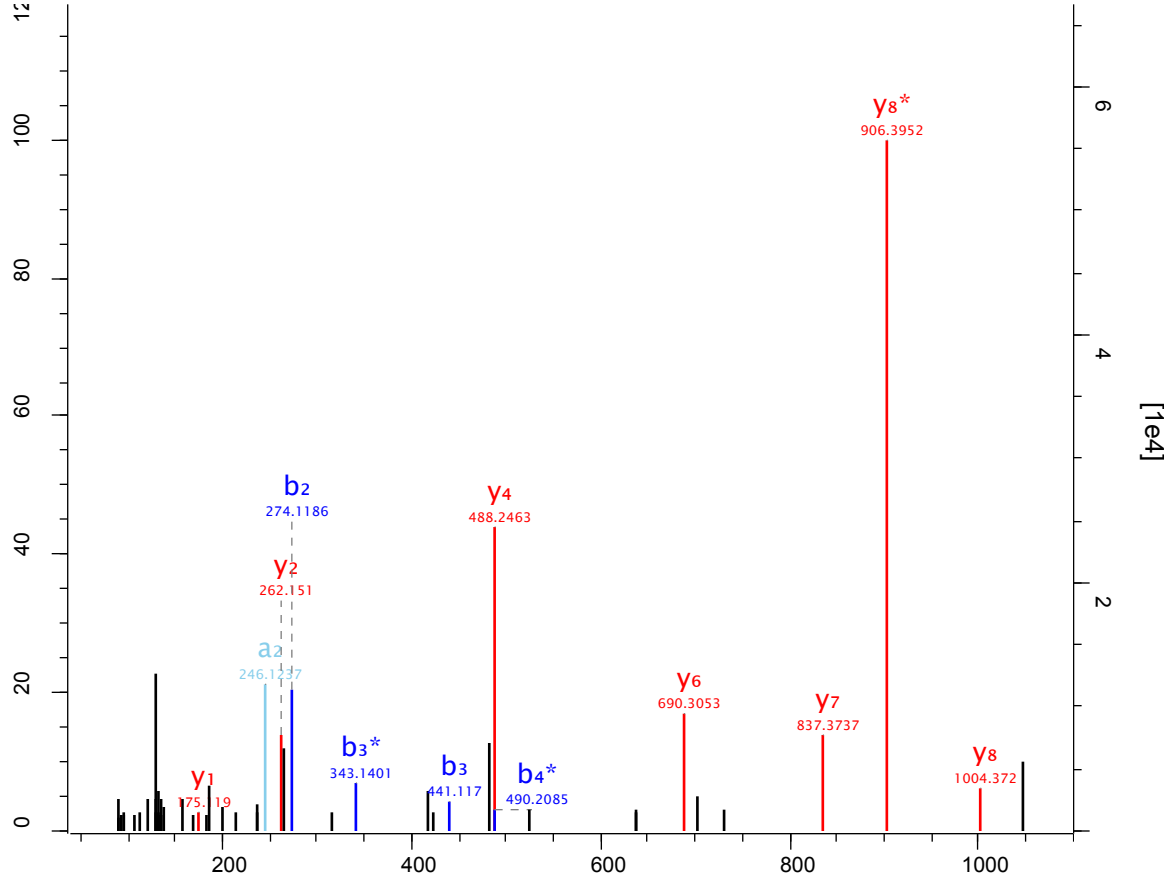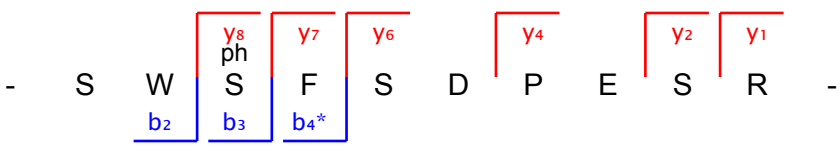

2013\_COL15\_34\_38\_151128201608

21434

FTMS; HCD

51.31

713.34

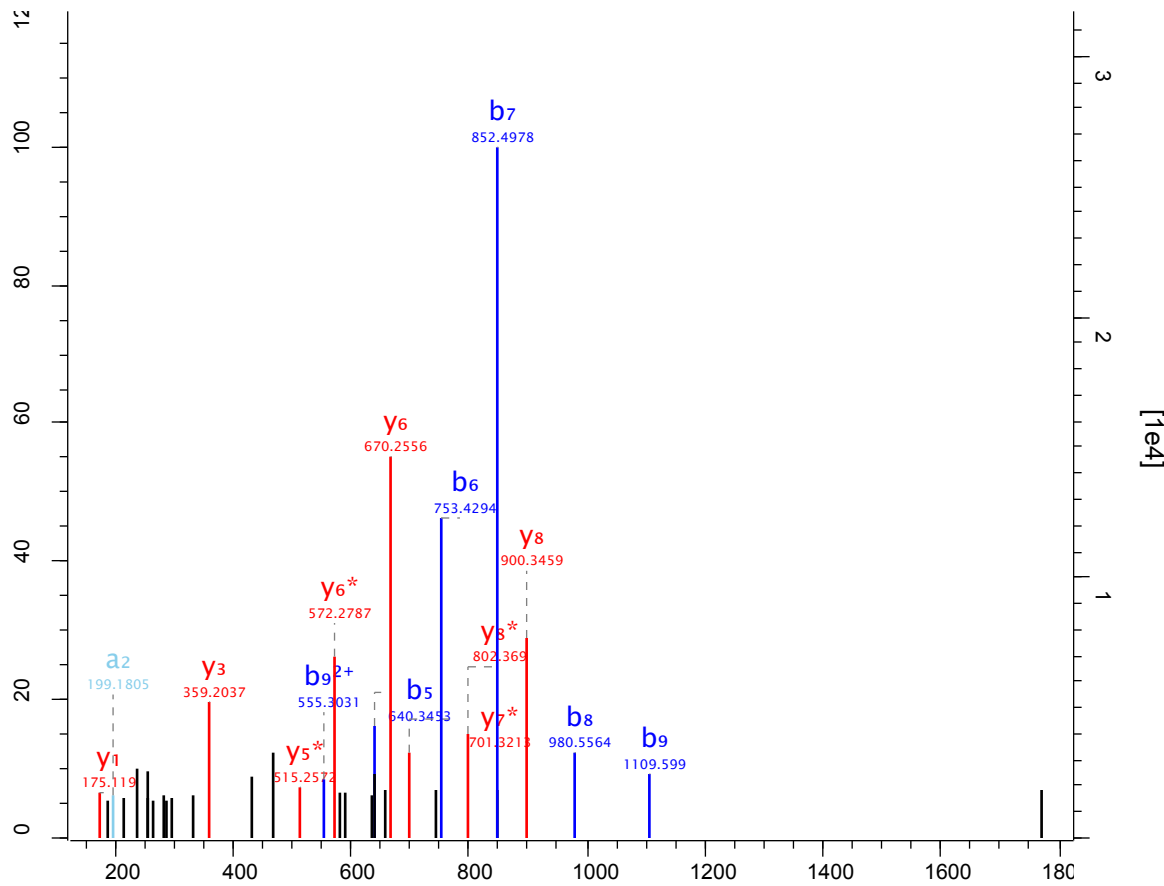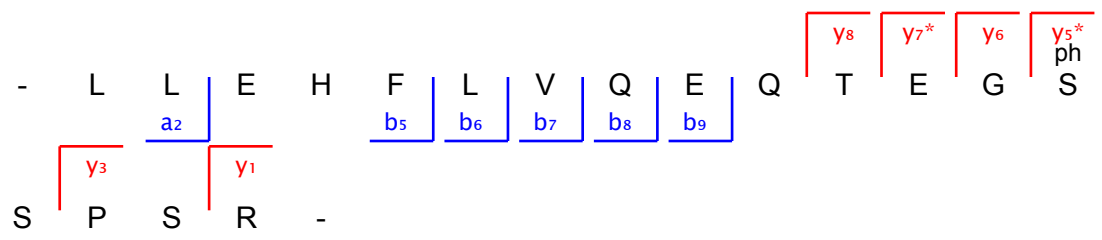



2013\_COL15\_34\_38\_151128201608

21441

FTMS; HCD

107.21

808.01

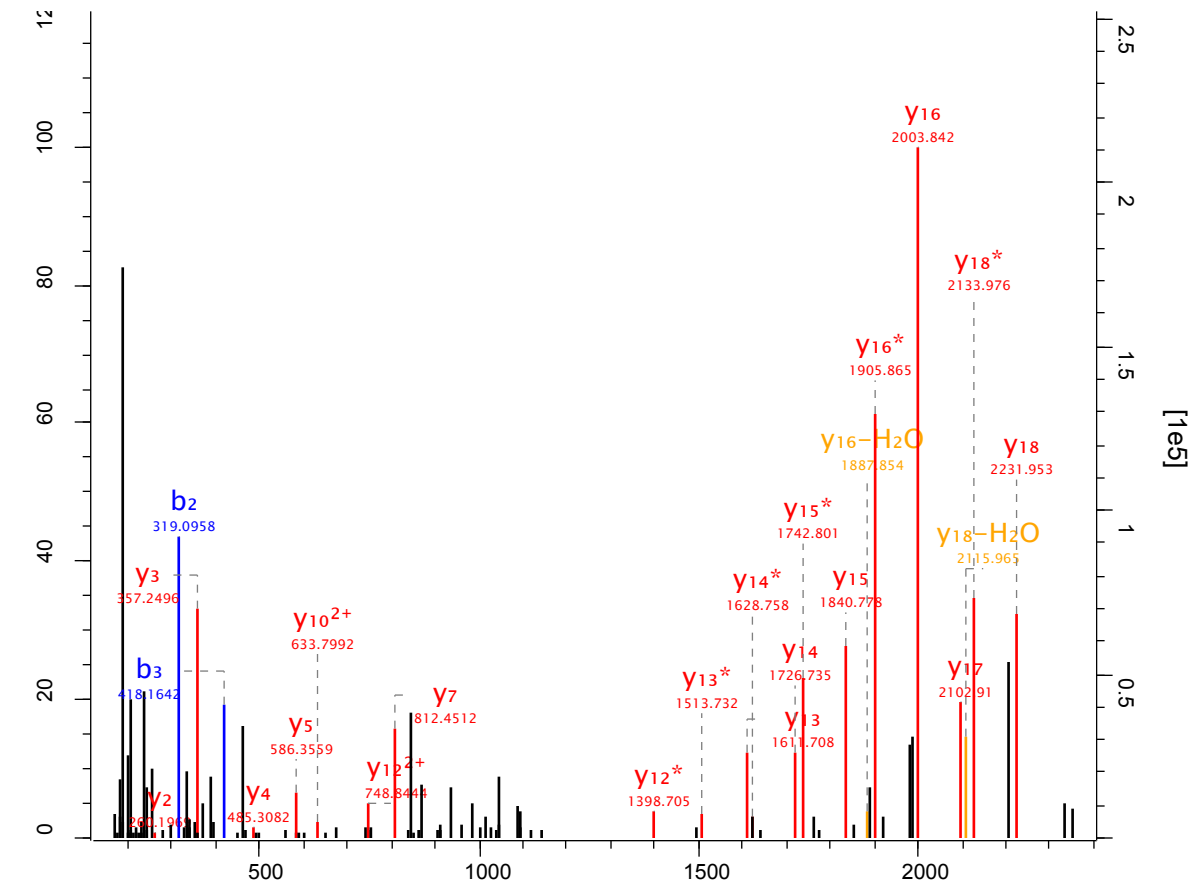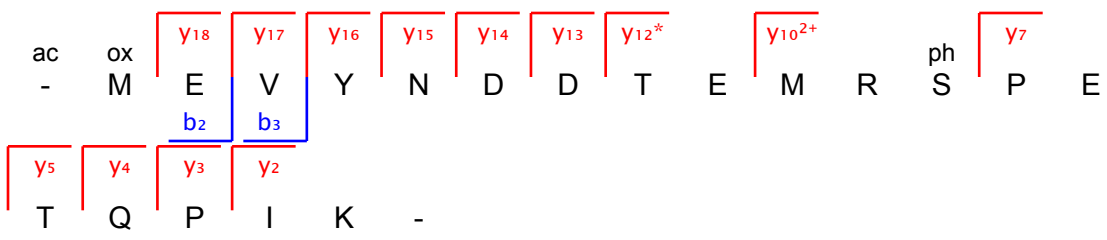

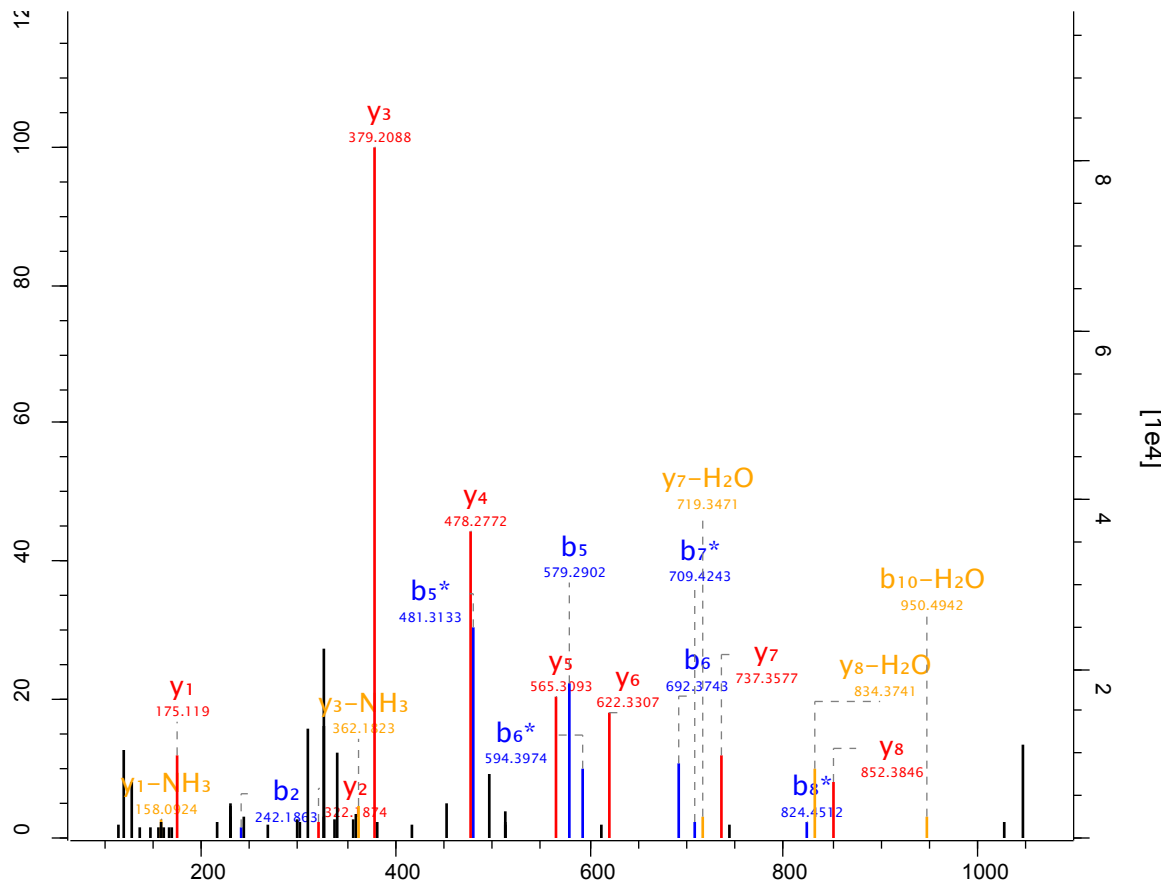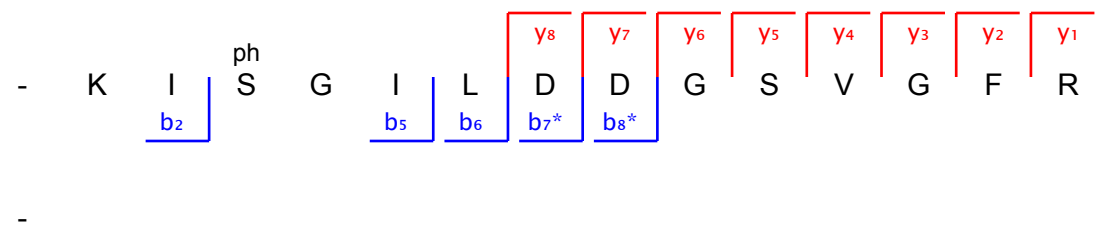

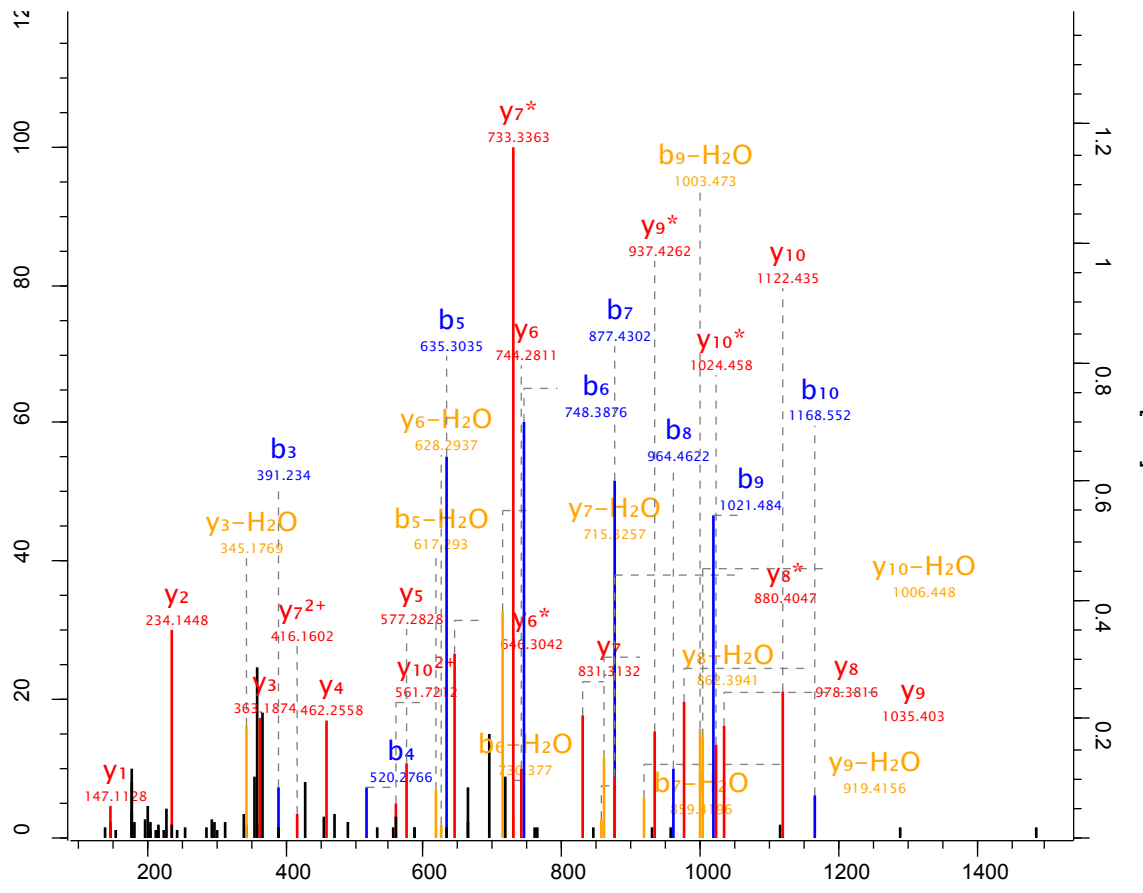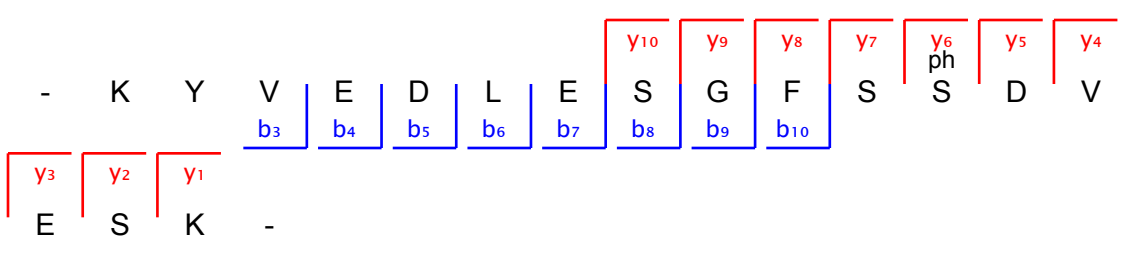

Raw file 2013\_COL15\_34\_38\_151128201608 Scan 21809 Method FTMS; HCD Score 42.35 m/z 849.69

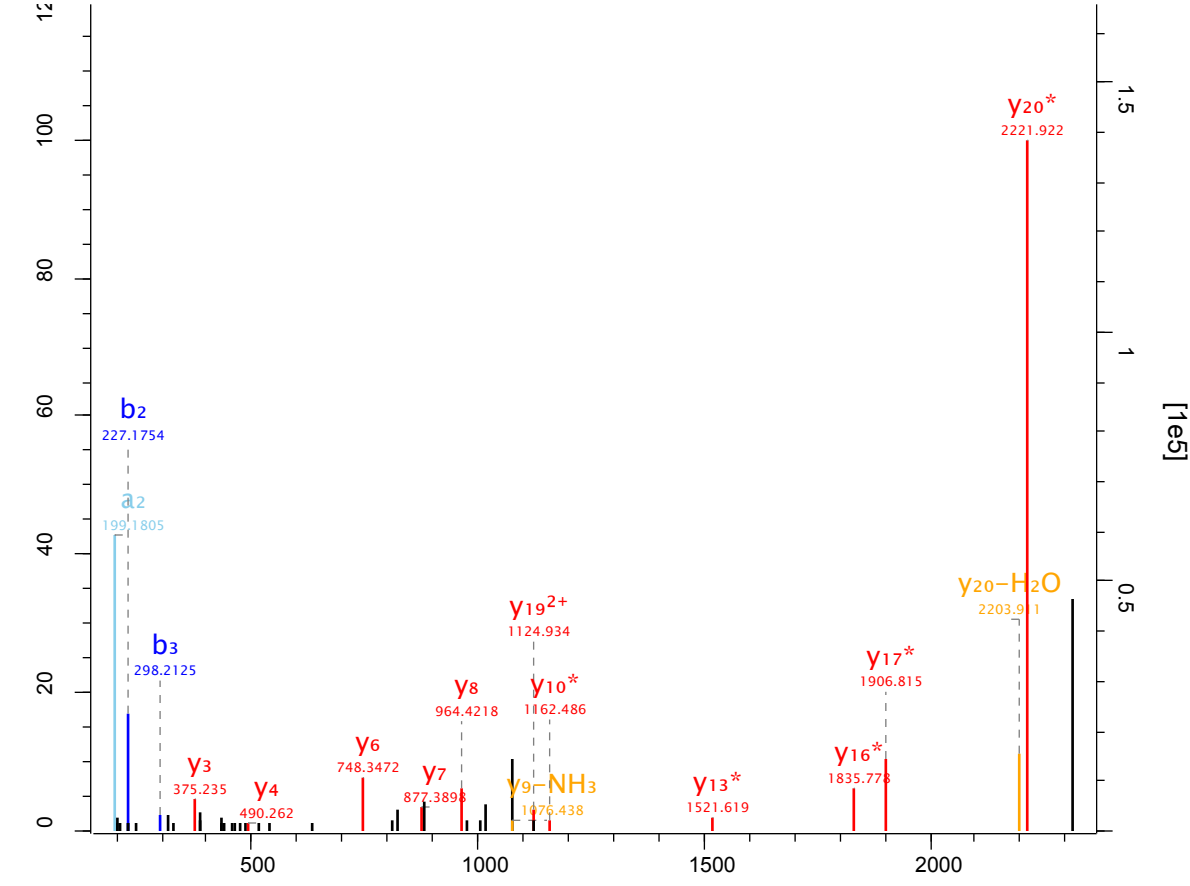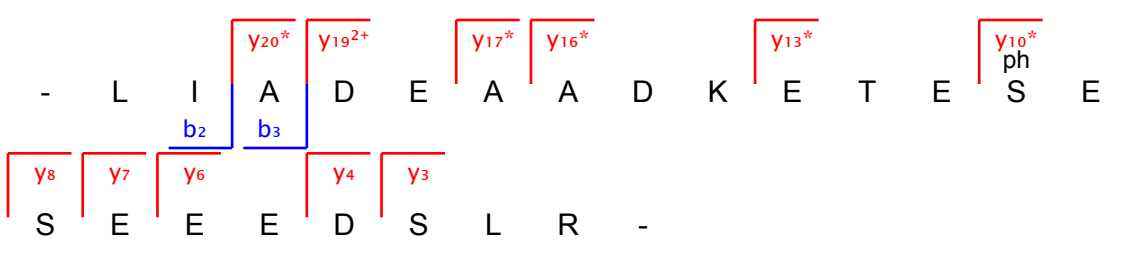

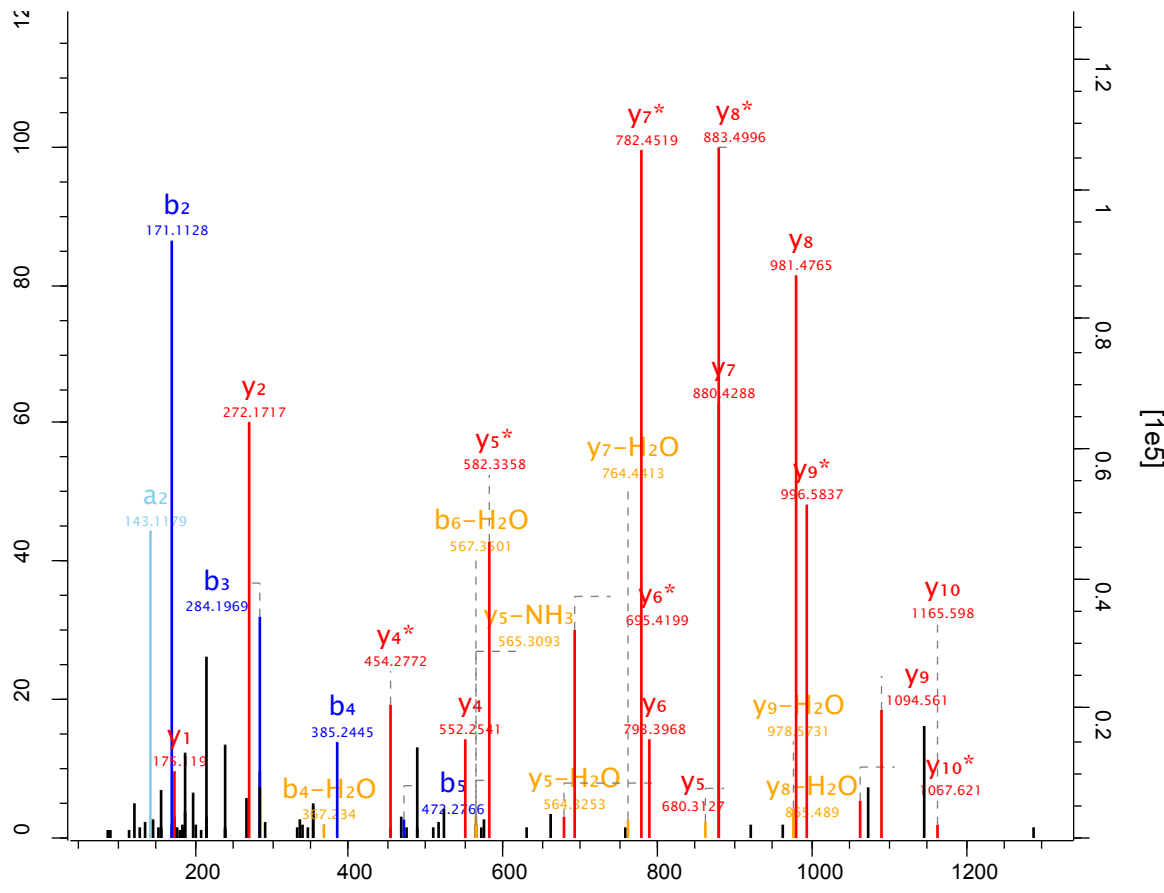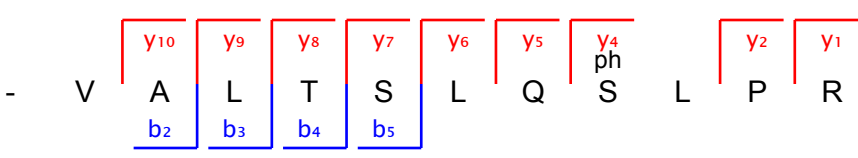

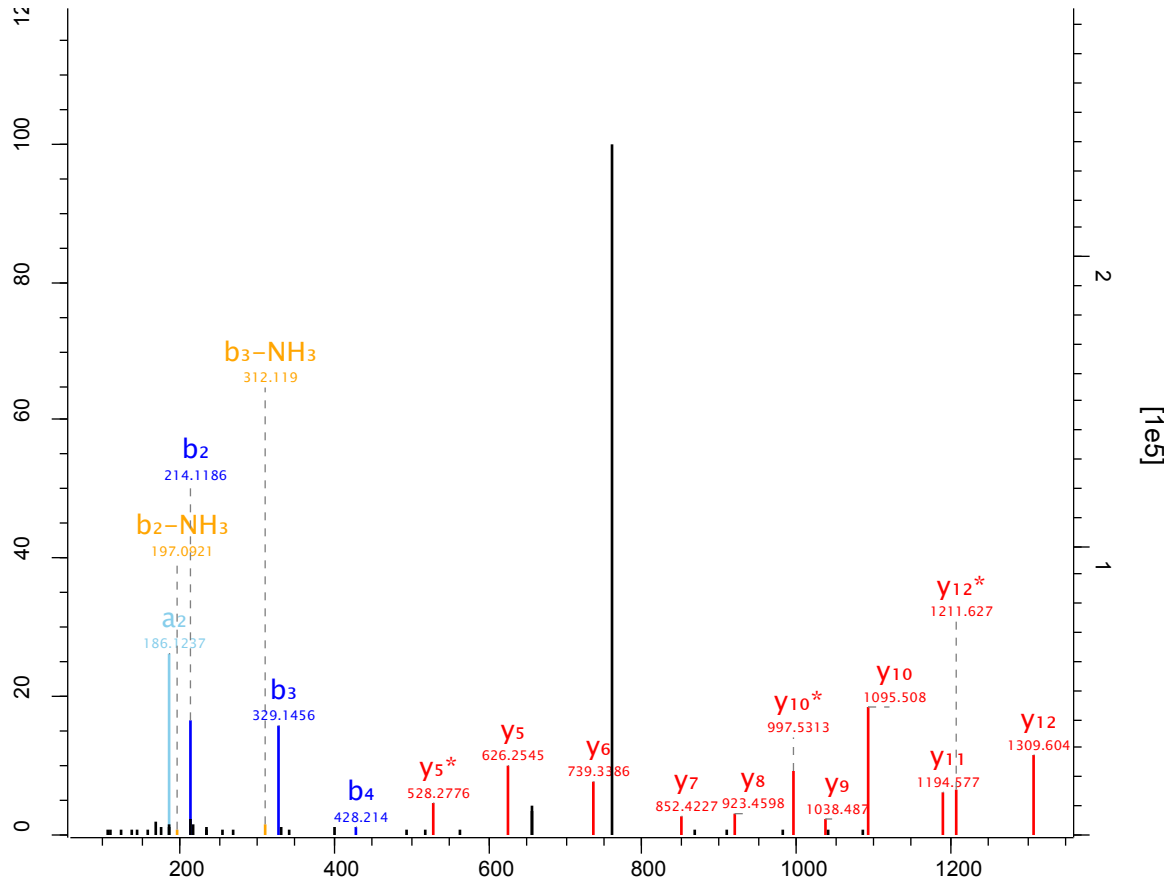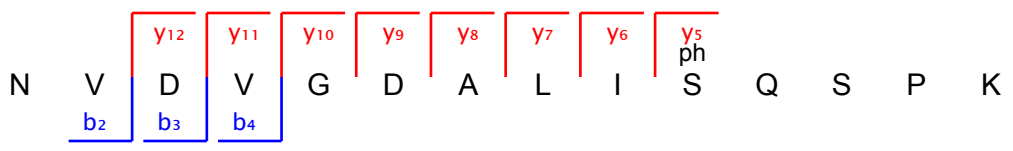

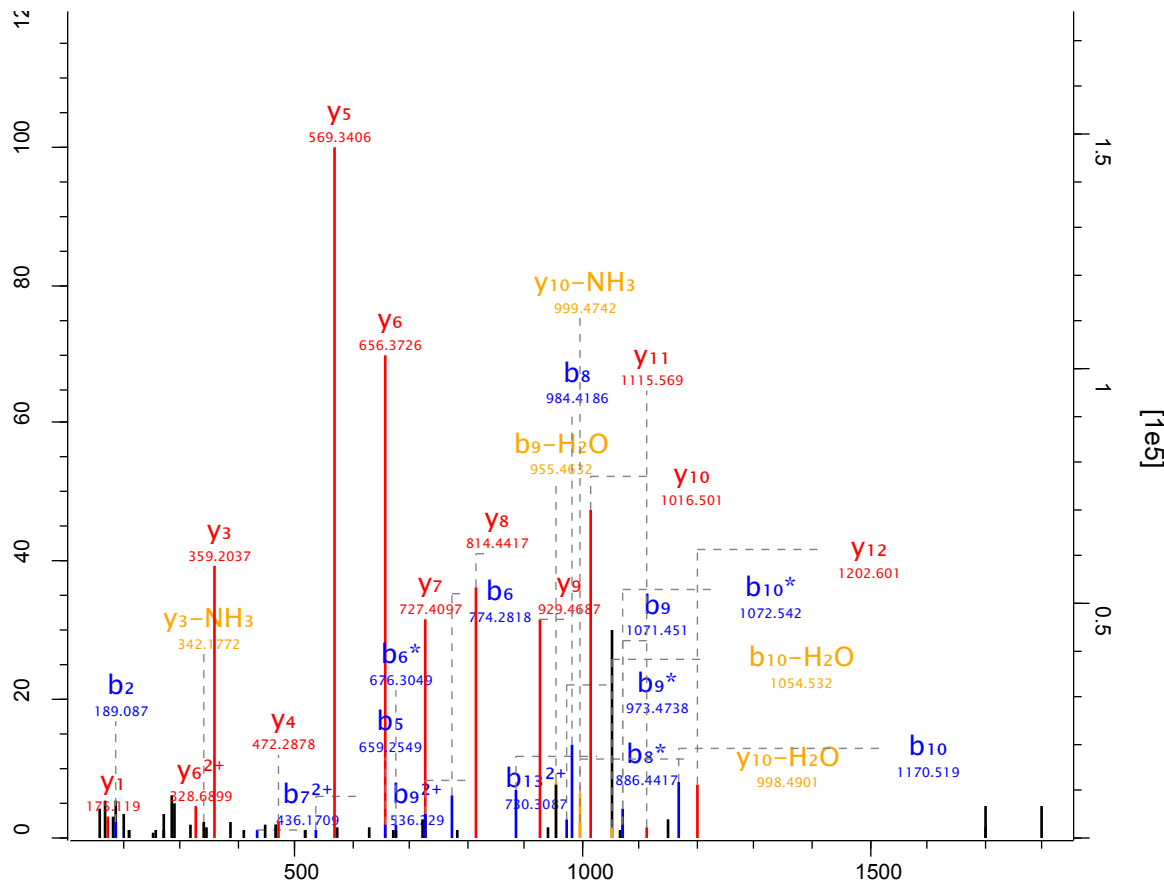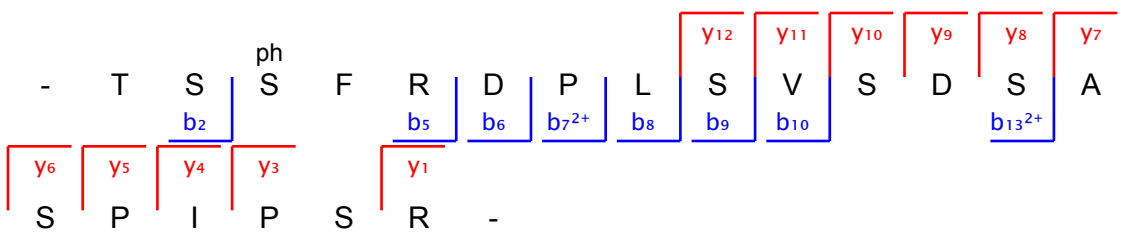

Raw file Scan Method Score m/z  
 2013\_COL15\_34\_38\_151128201608 22123 FTMS; HCD 48.63 843.72

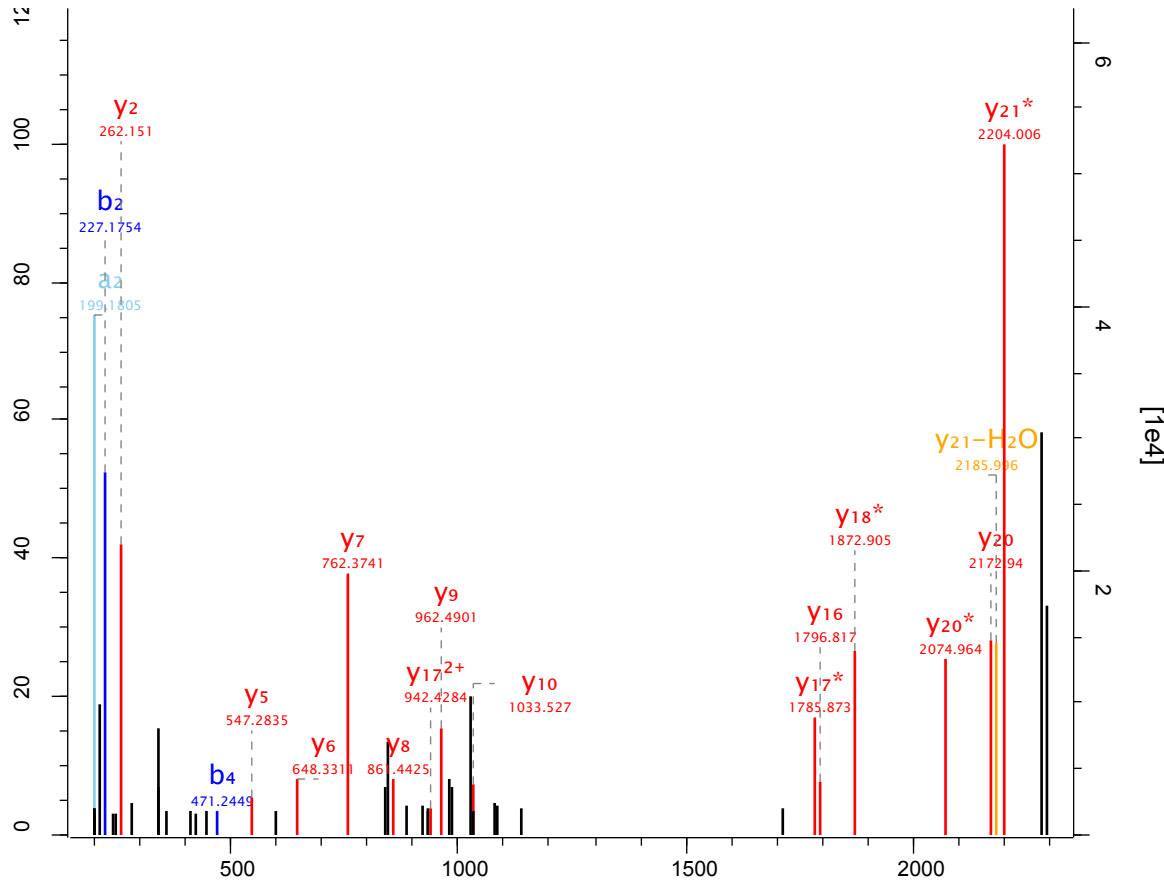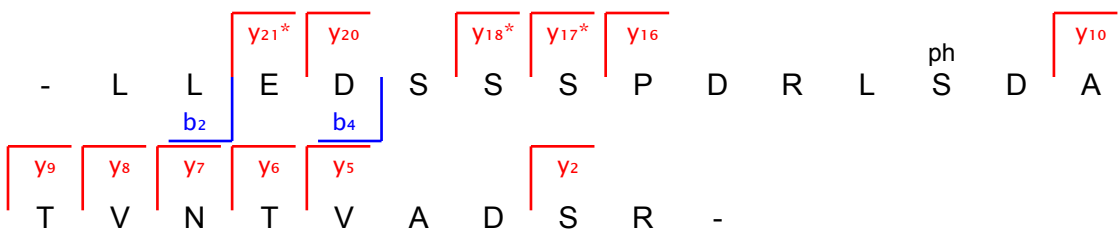



Raw file Scan Method Score m/z  
 2013\_COL15\_34\_38\_151128201608 22146 FTMS; HCD 44.34 629.95

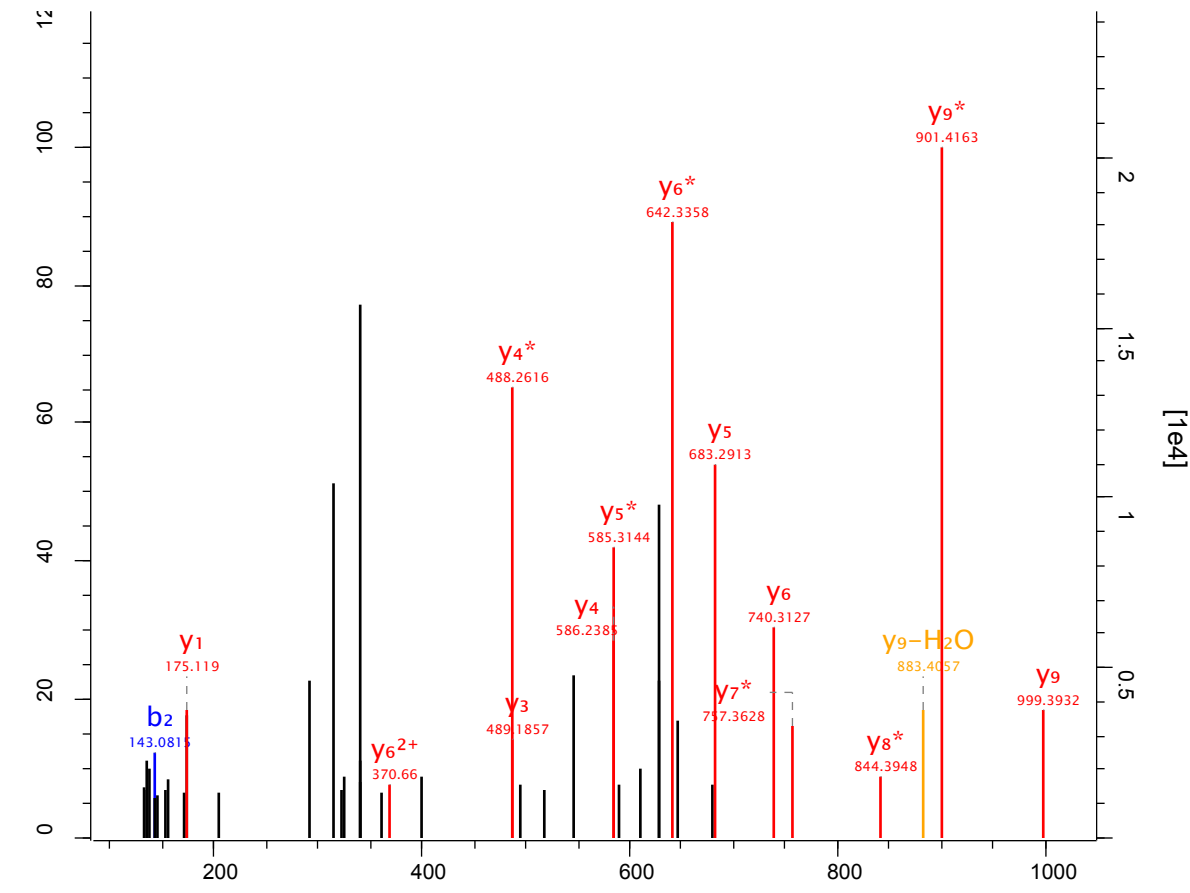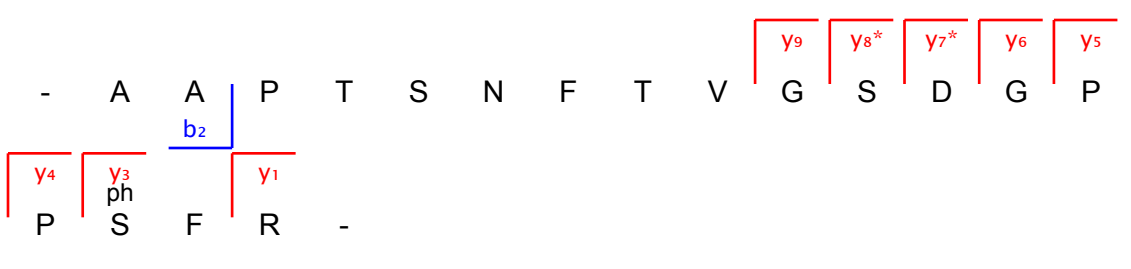

2013\_COL15\_34\_38\_151128201608

22155

FTMS; HCD

112.82

802.88

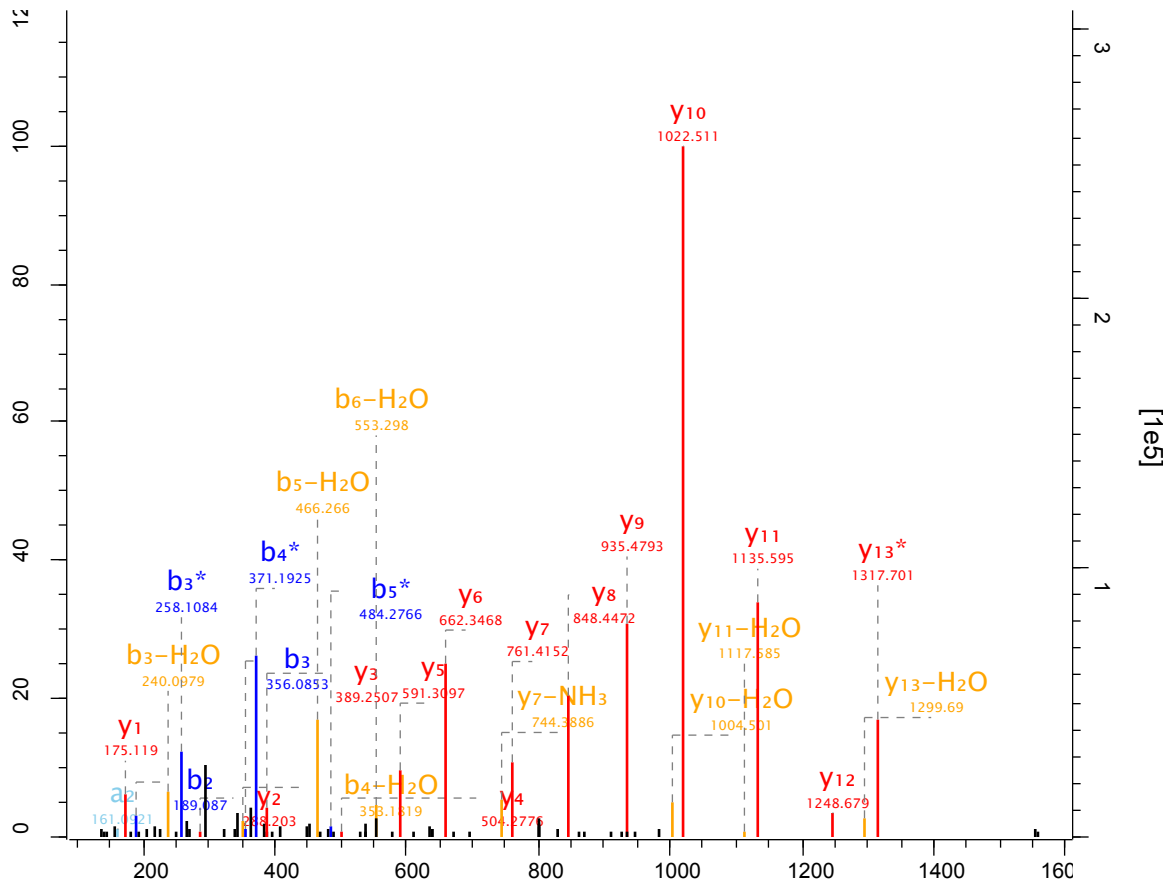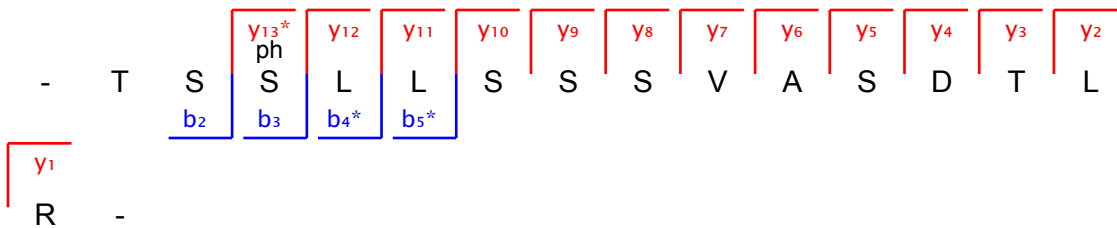

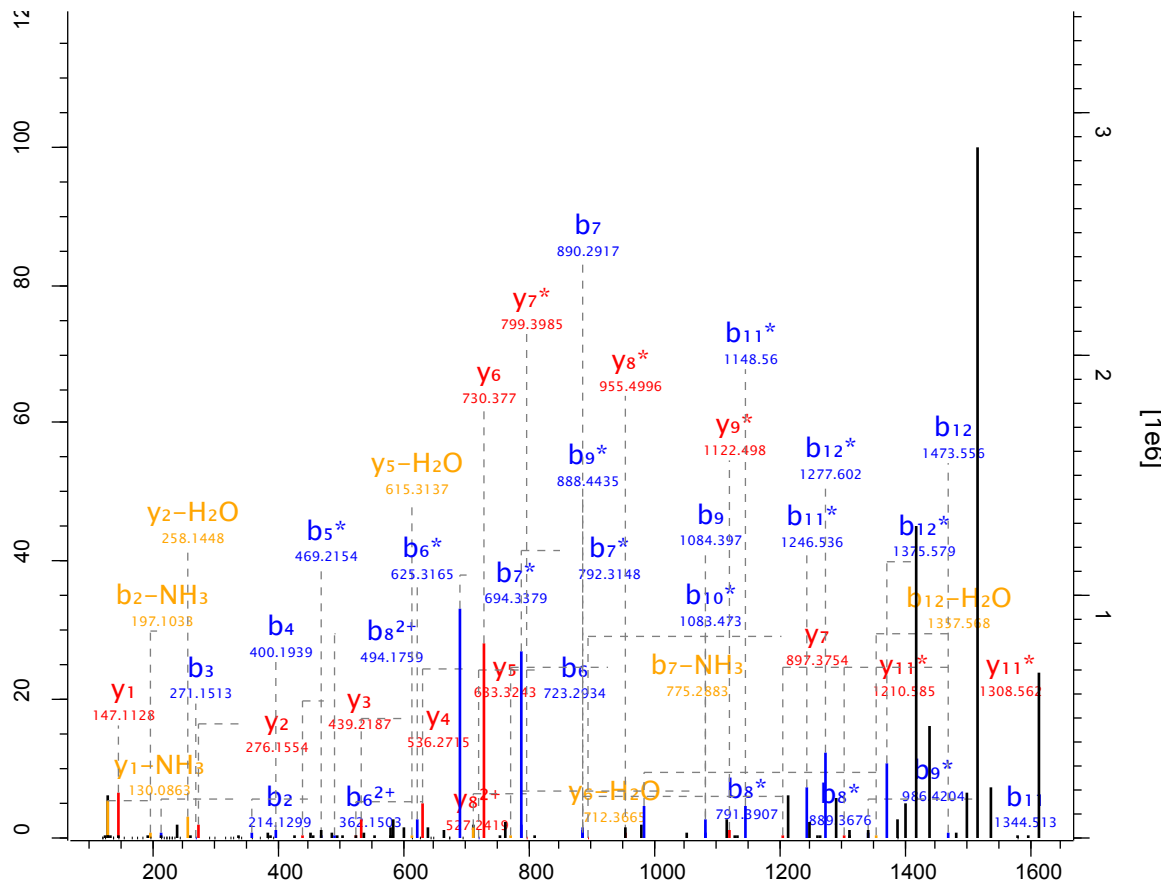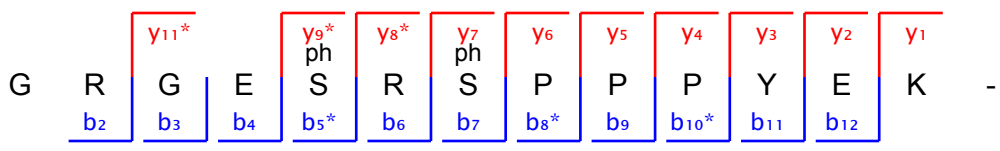

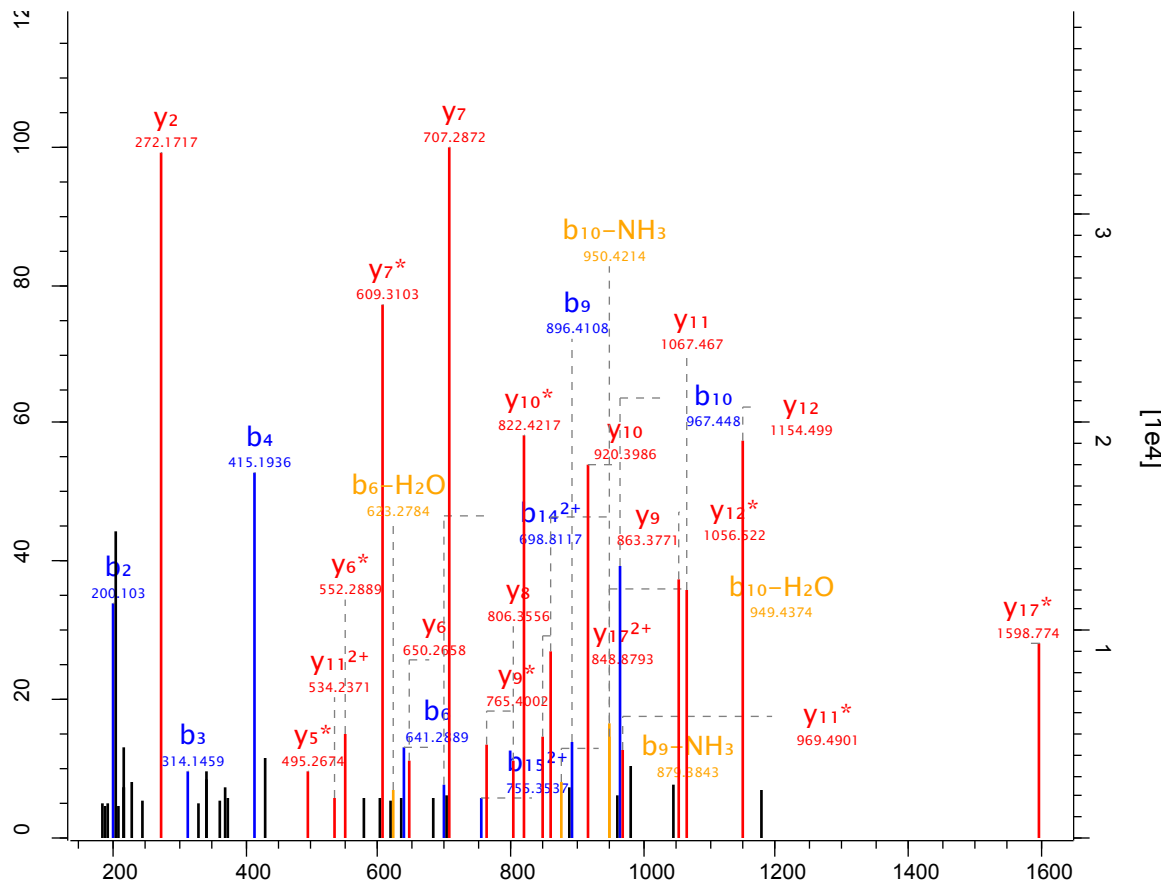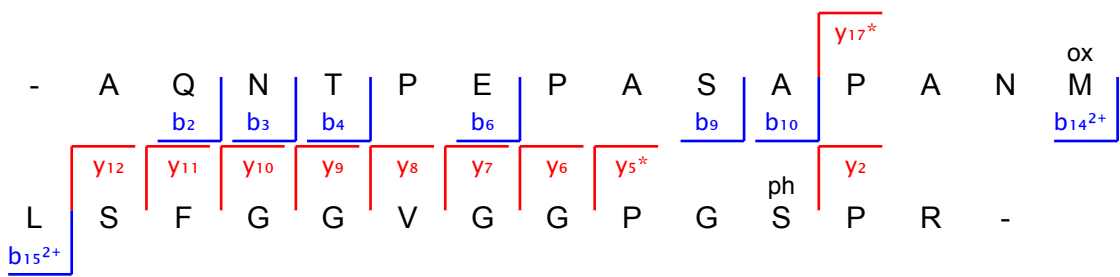

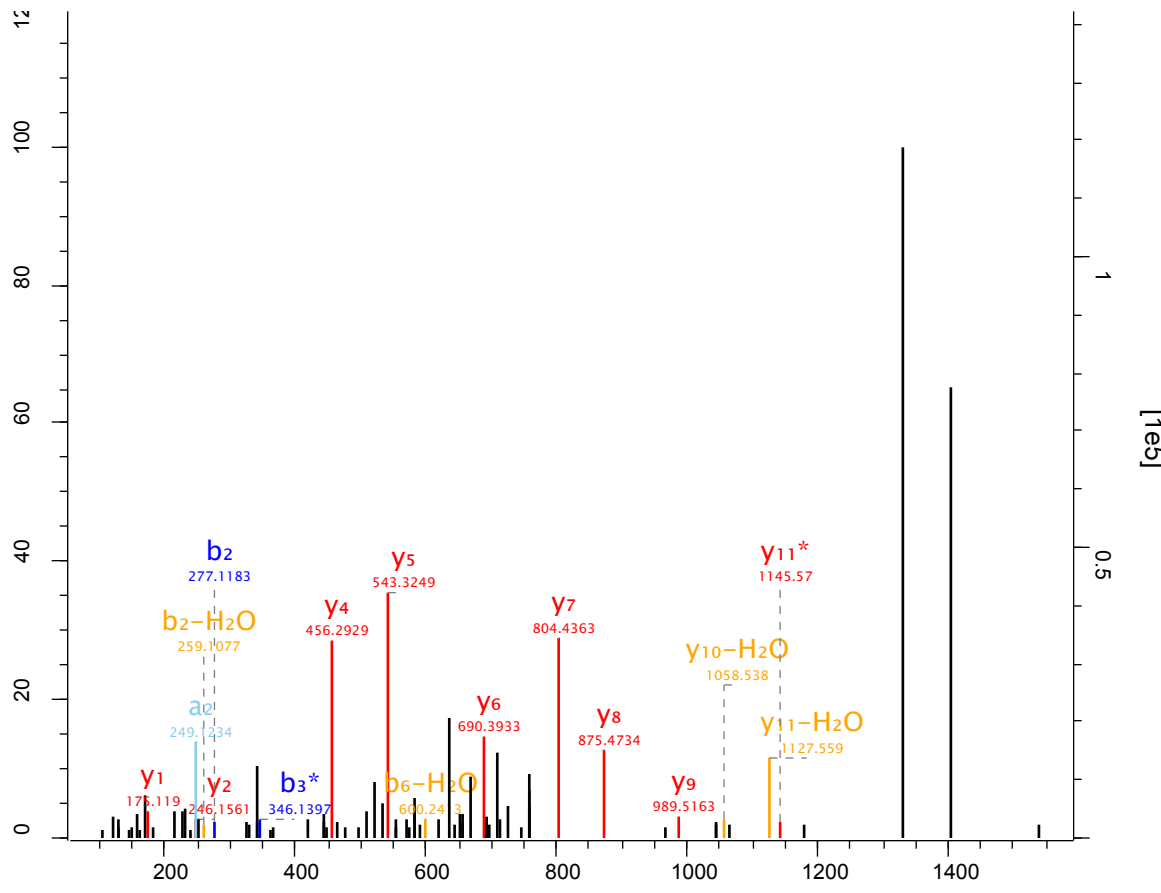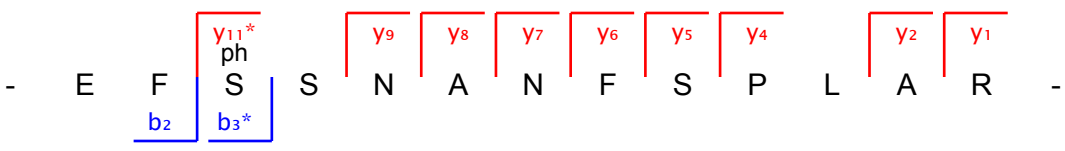

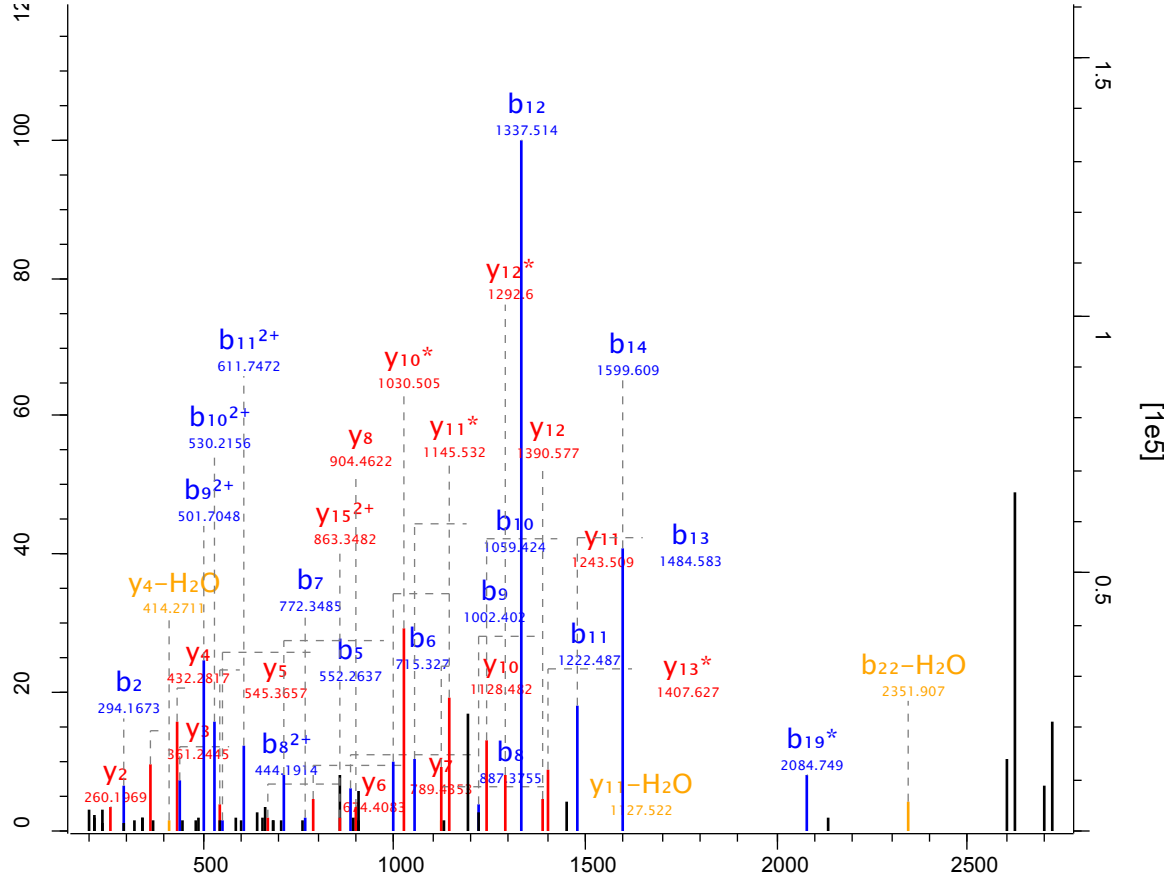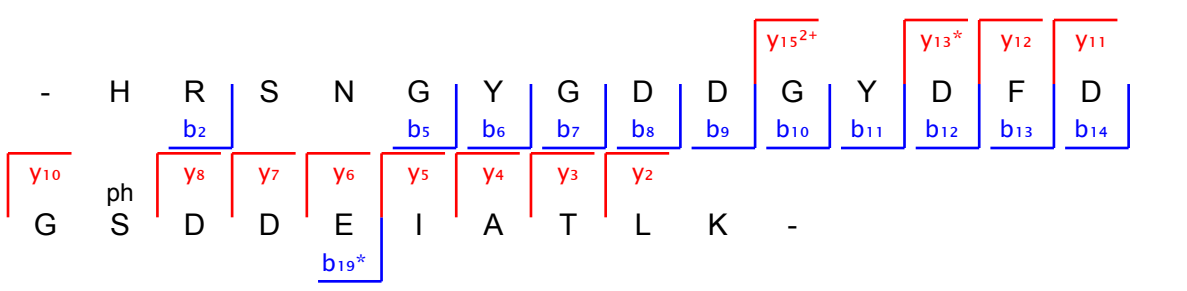

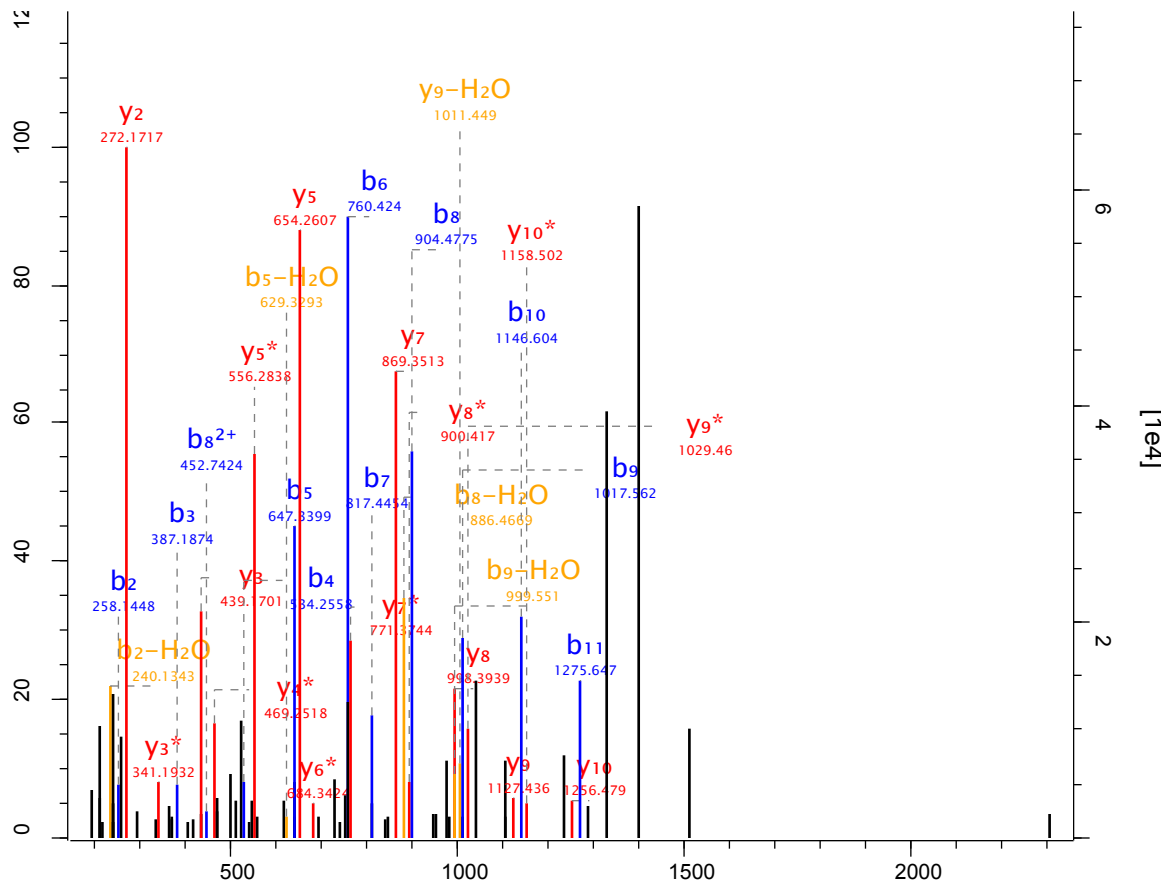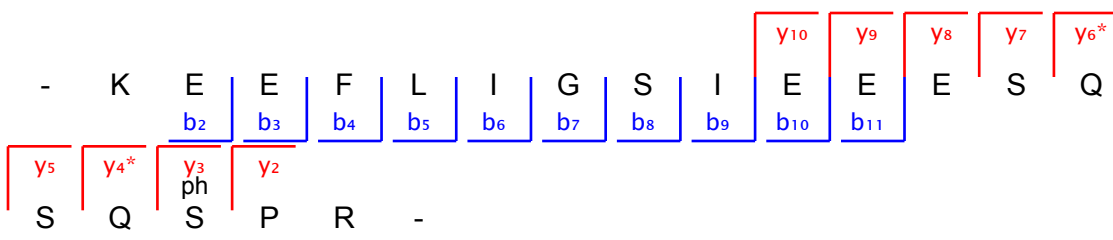

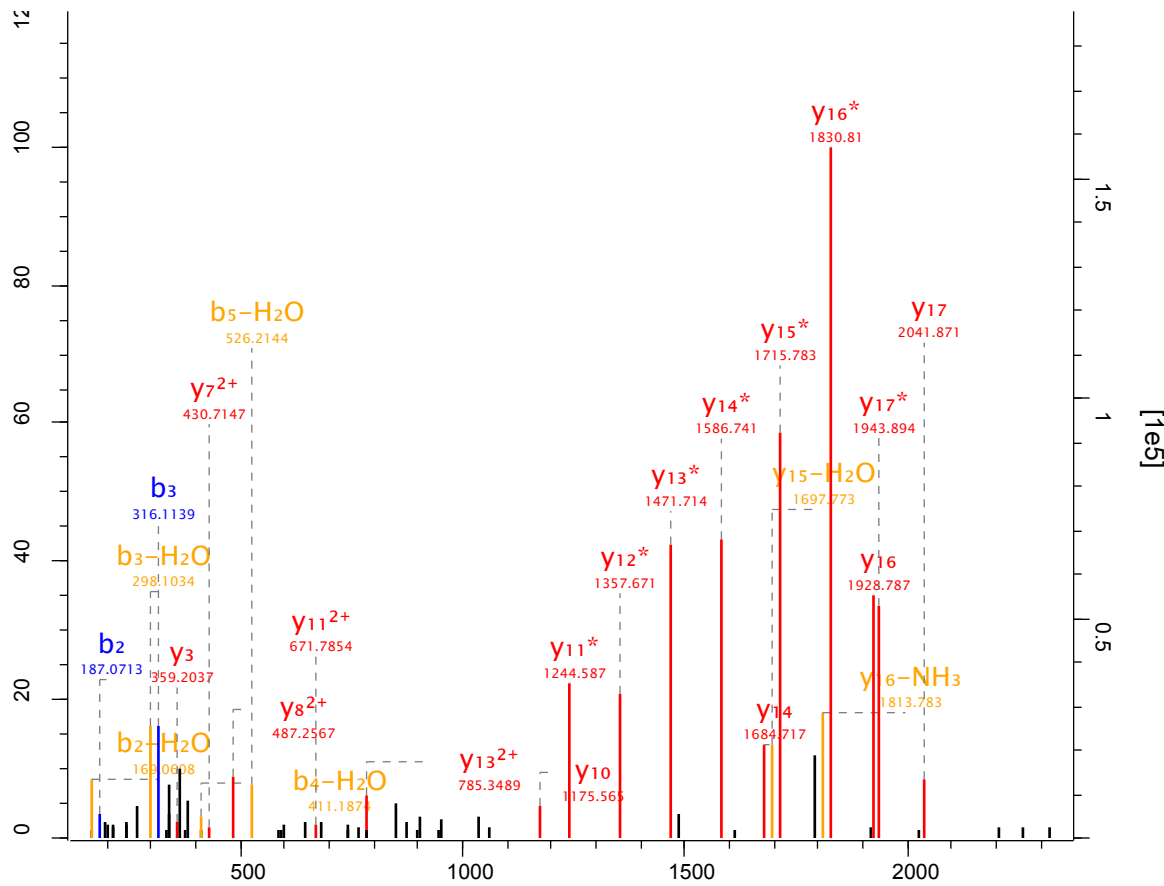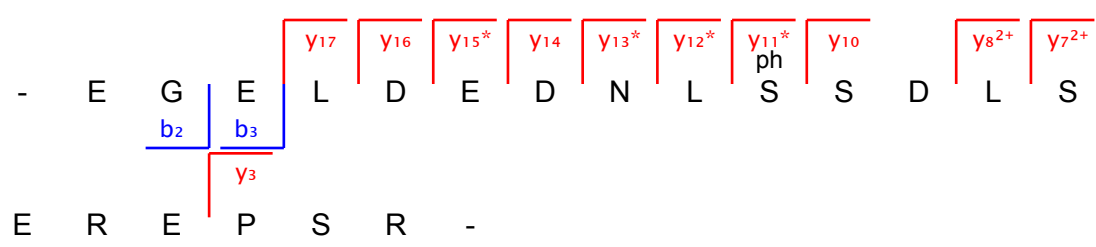



2013\_COL15\_34\_38\_151128201608

23084

FTMS; HCD

118.37

832.41

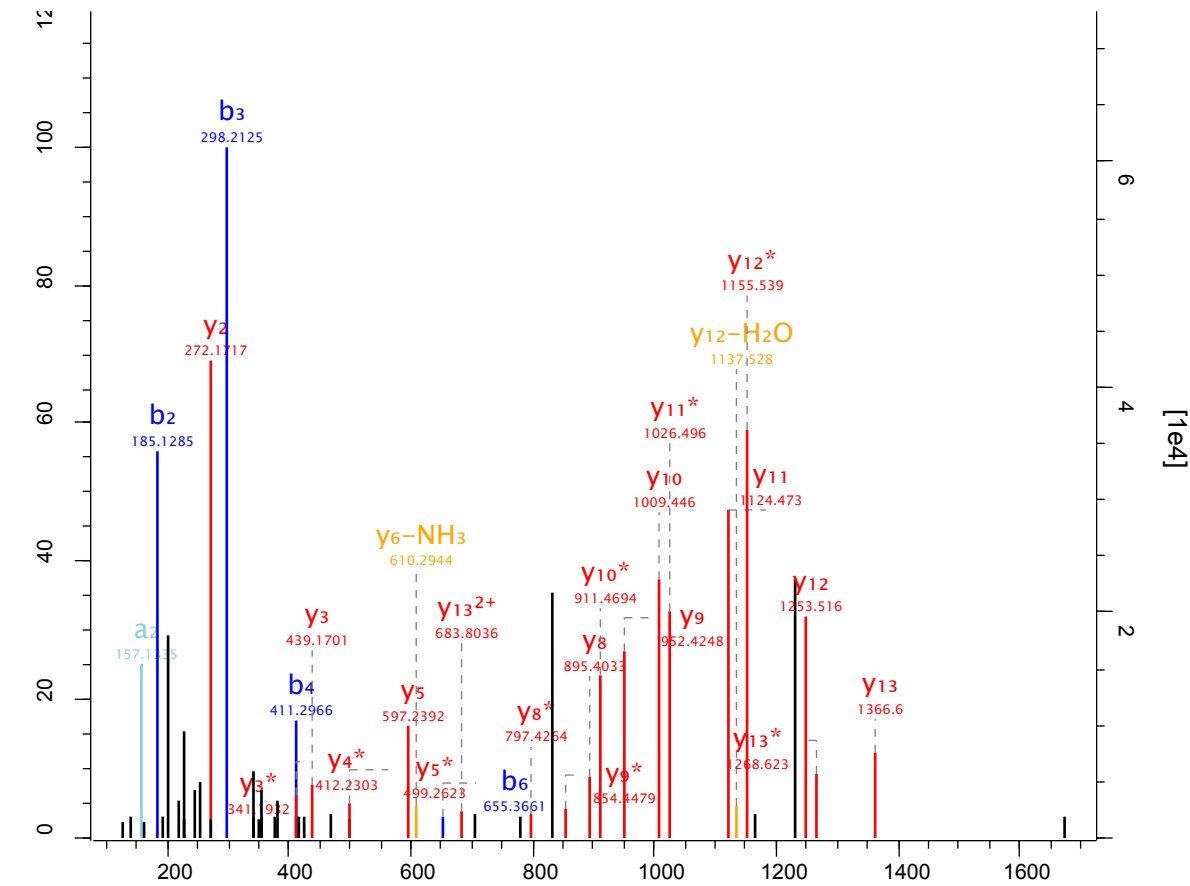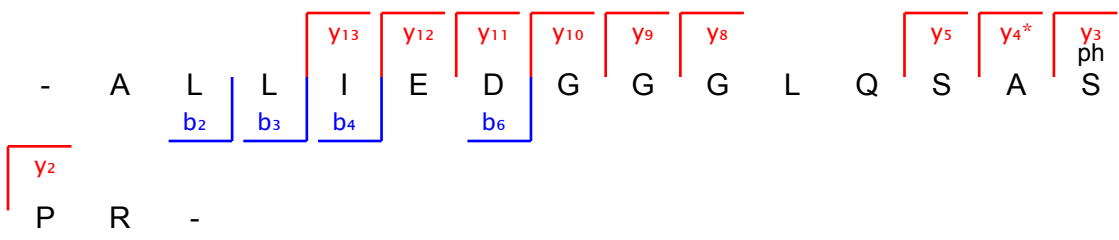

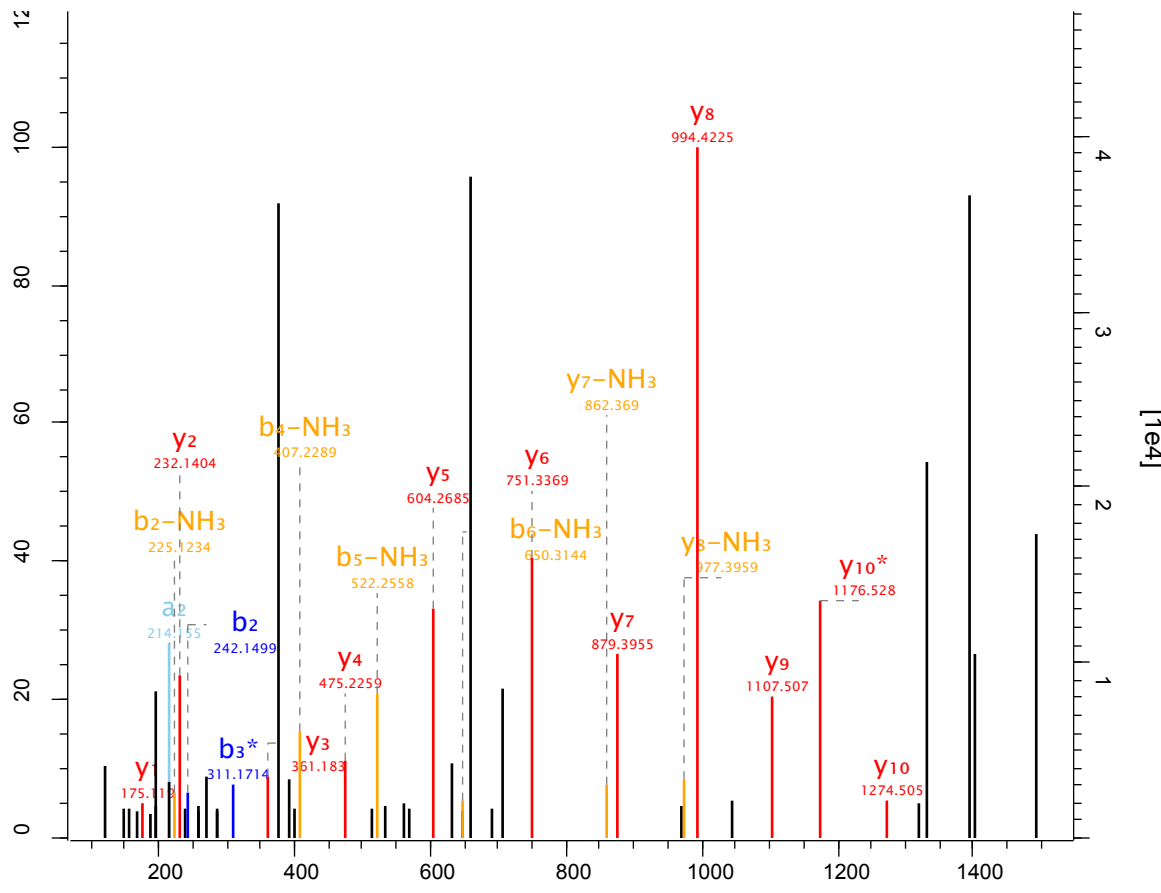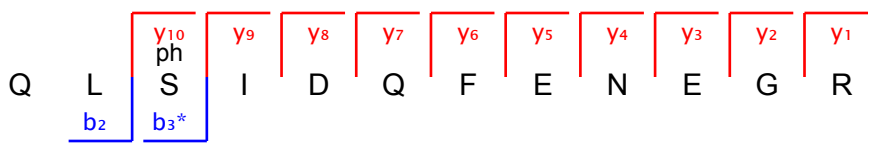

Raw file Scan Method Score m/z

2013\_COL15\_34\_38\_151128201608

23420

FTMS; HCD

62.57

856.11

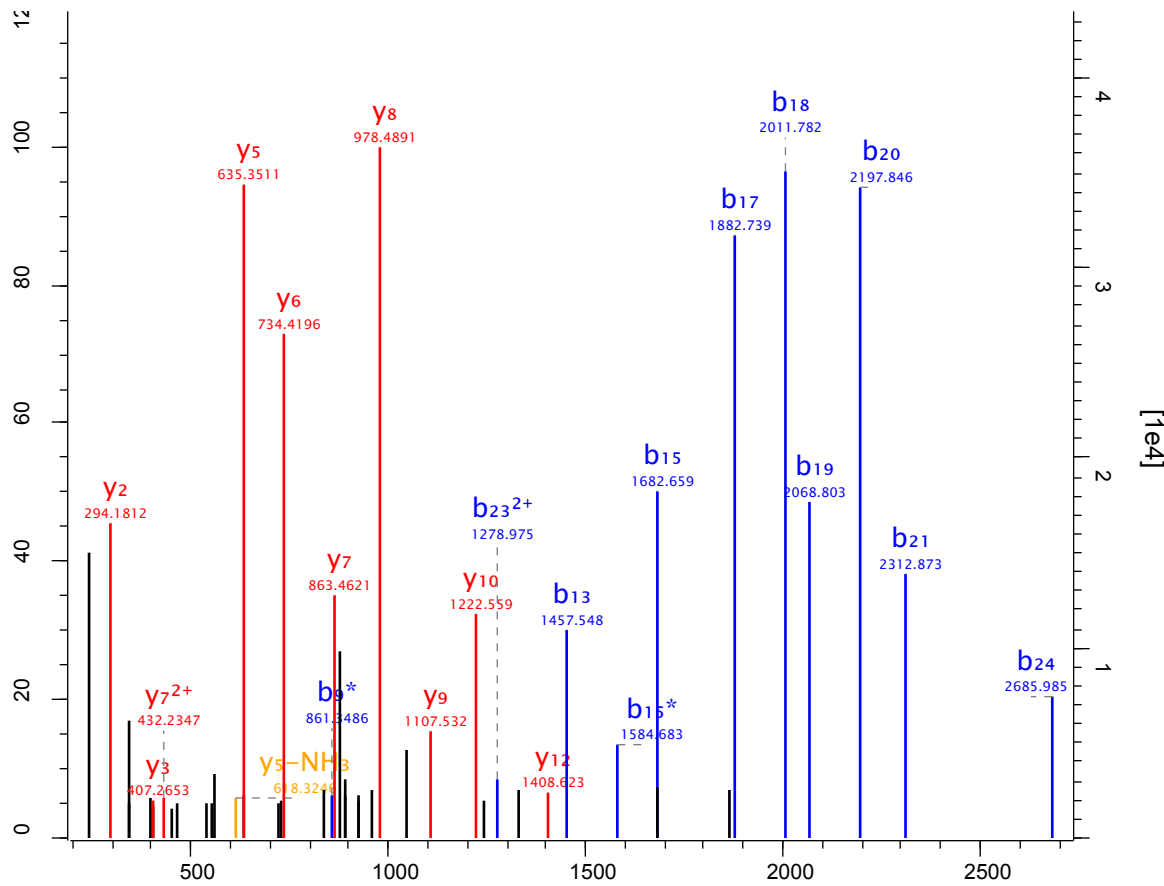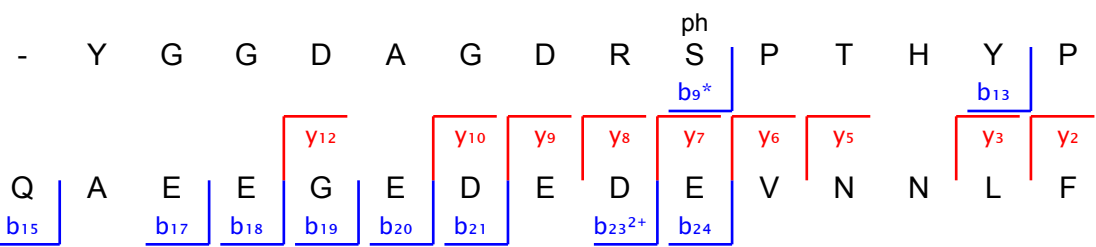

K -

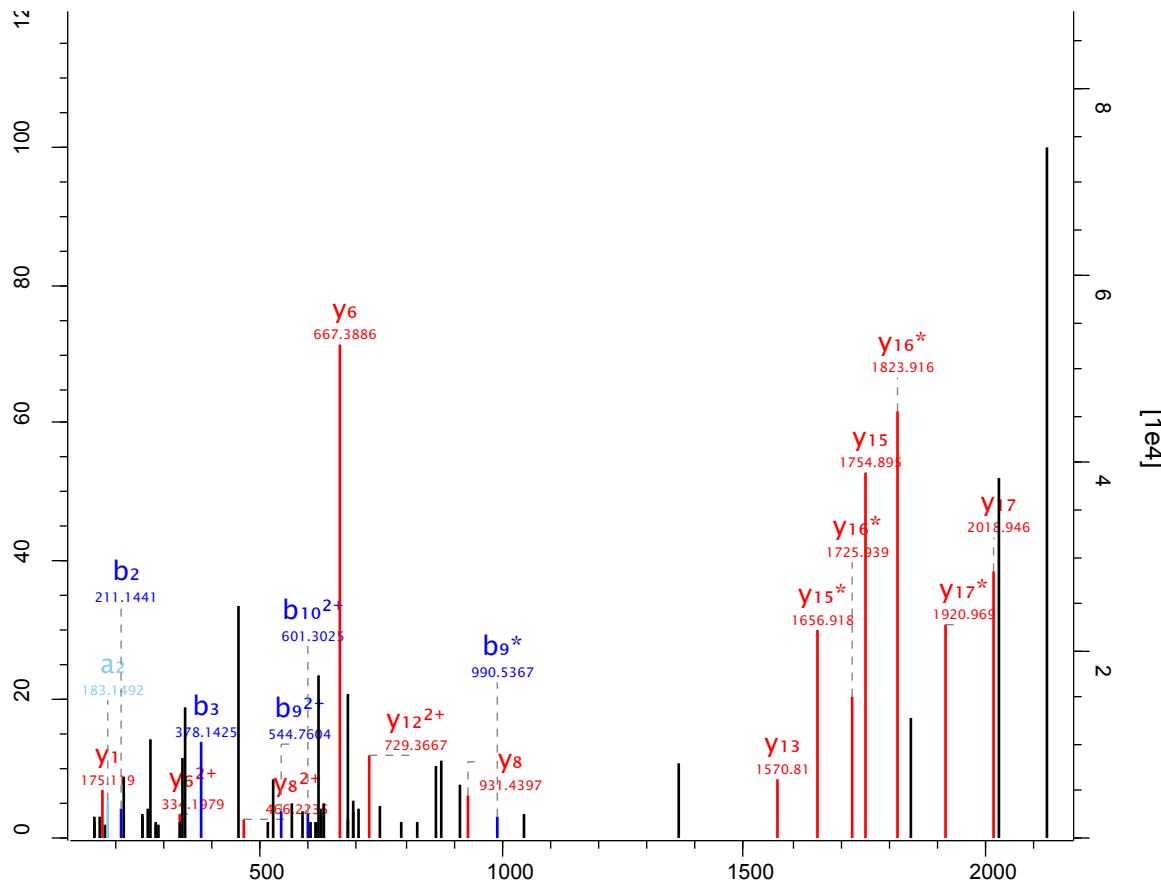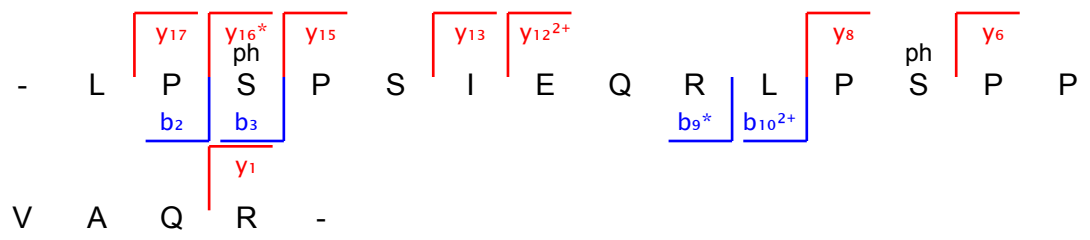

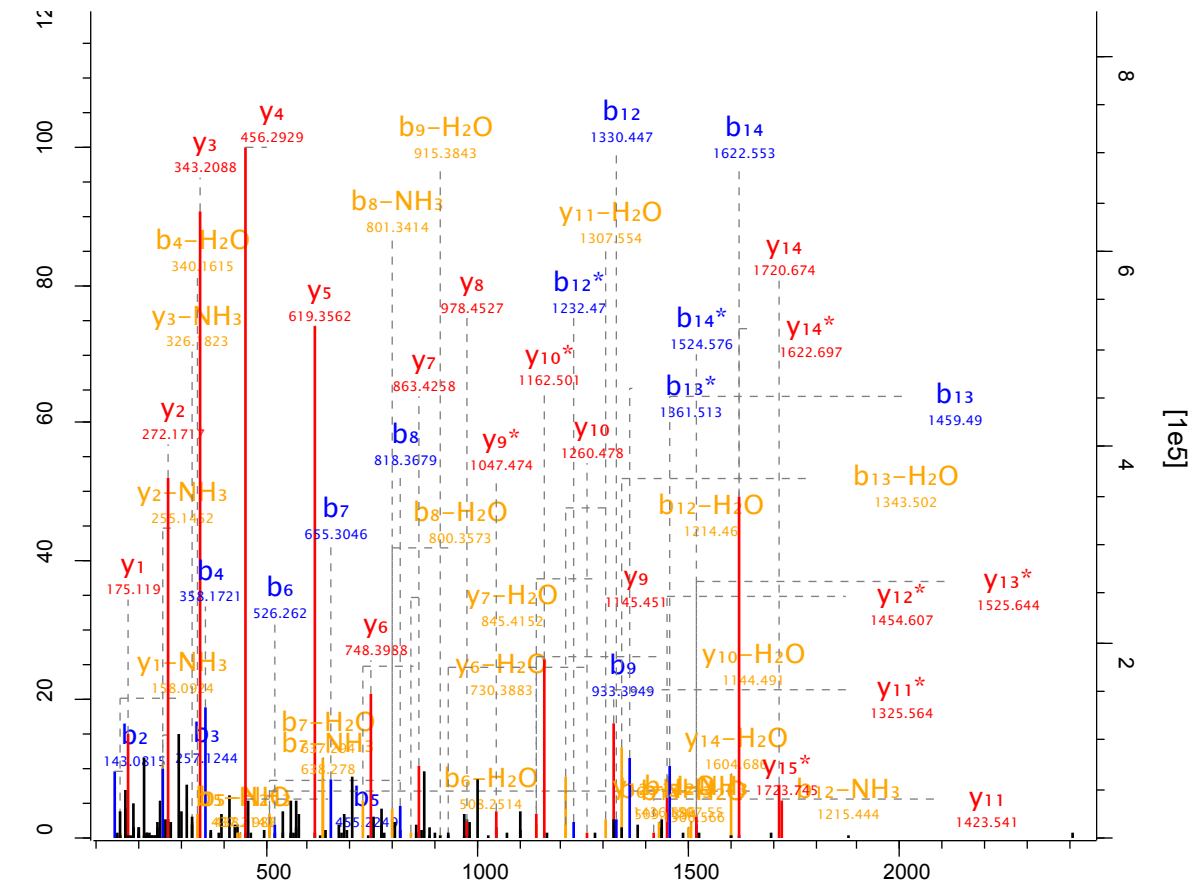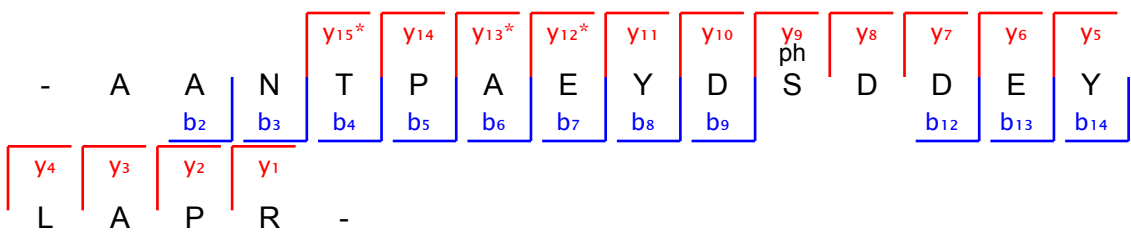

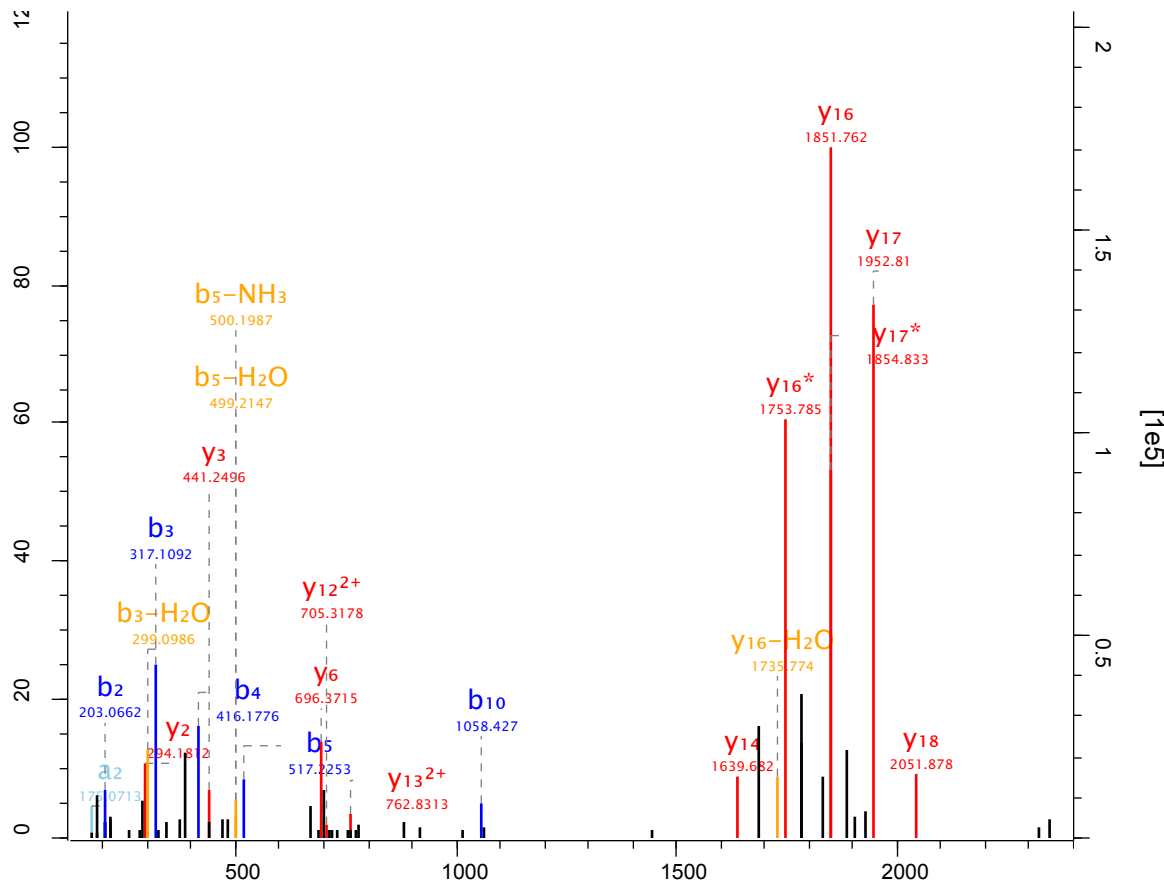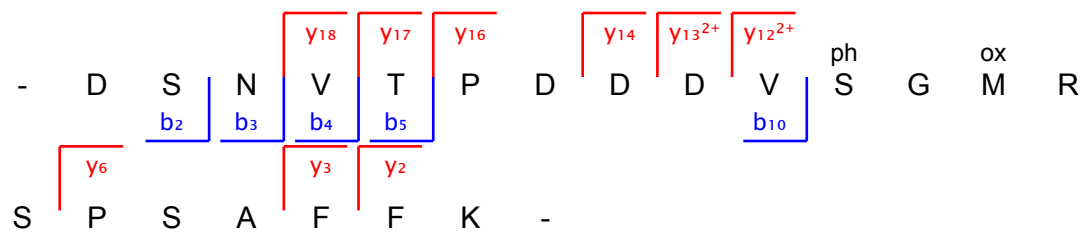

| Raw file                      | Scan | Method    | Score | m/z    |
|-------------------------------|------|-----------|-------|--------|
| 2013_COL15_34_38_151128201608 | 2377 | FTMS; HCD | 52.97 | 612.74 |

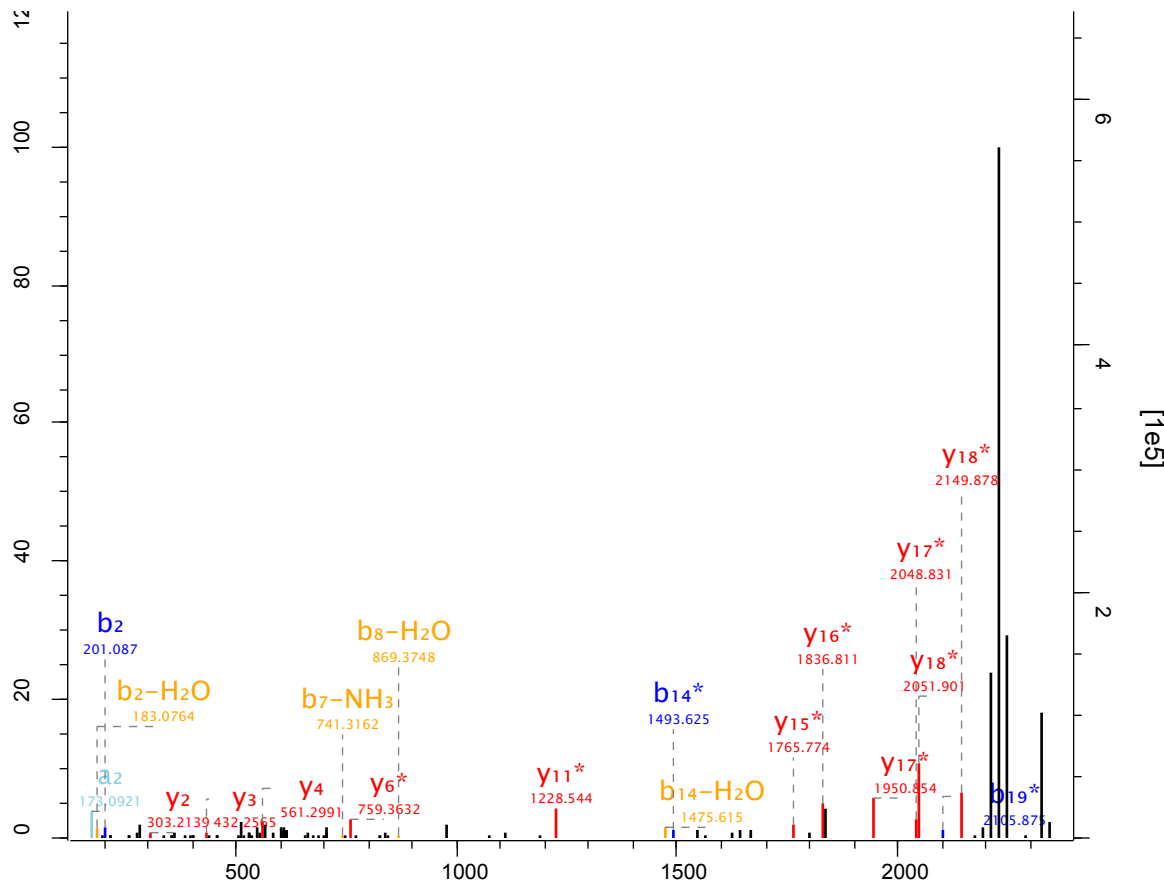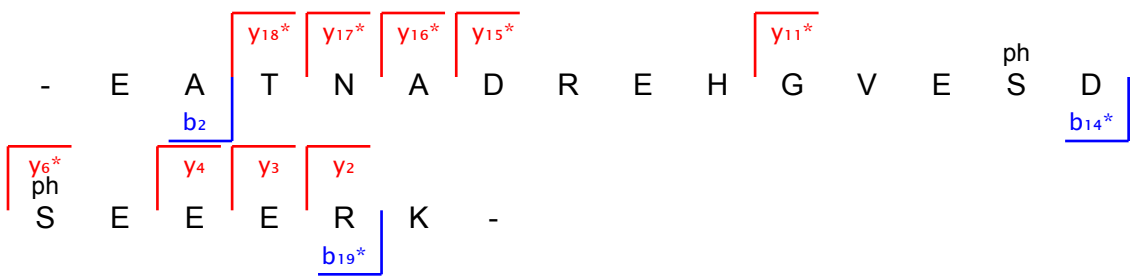

Raw file 2013\_COL15\_34\_38\_151128201608 Scan 23983 Method FTMS; HCD Score 107.75 m/z 871.72

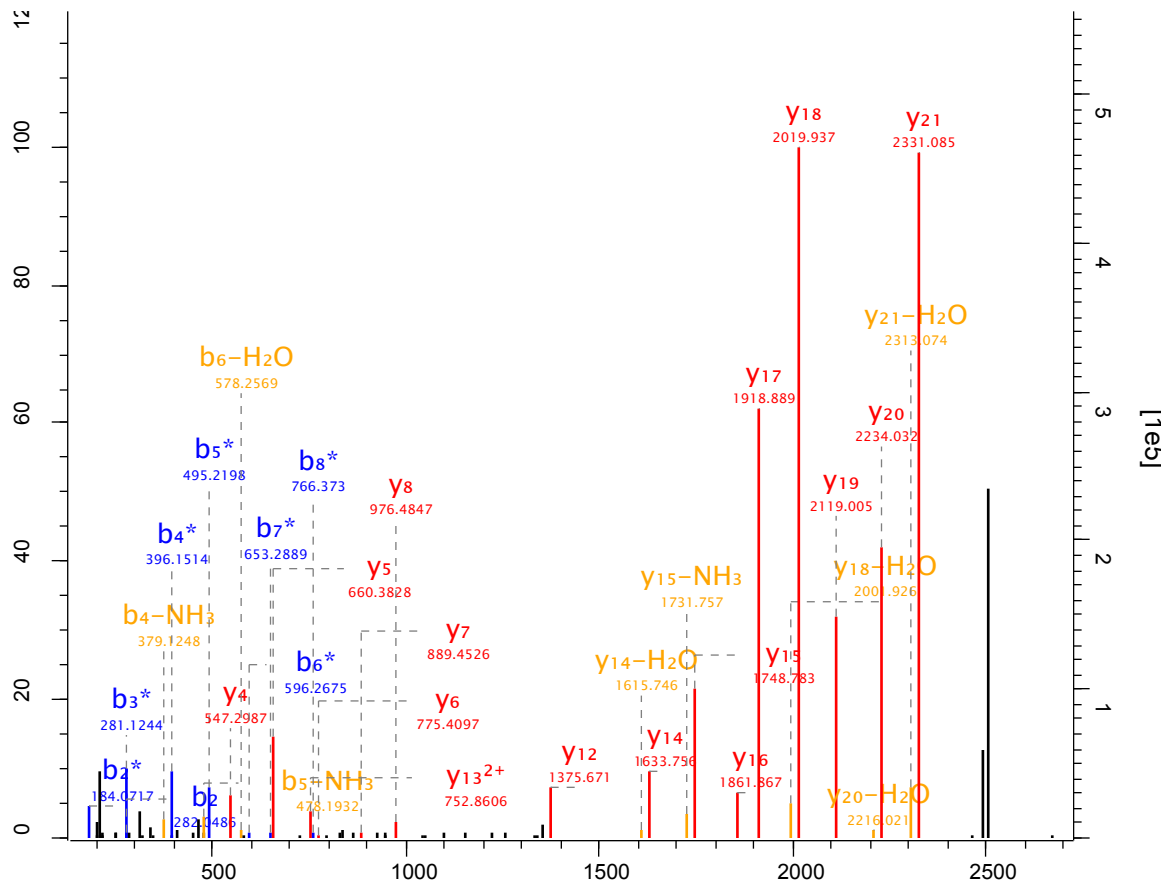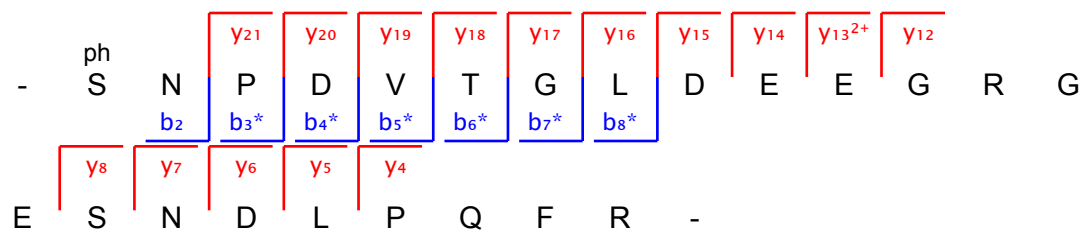



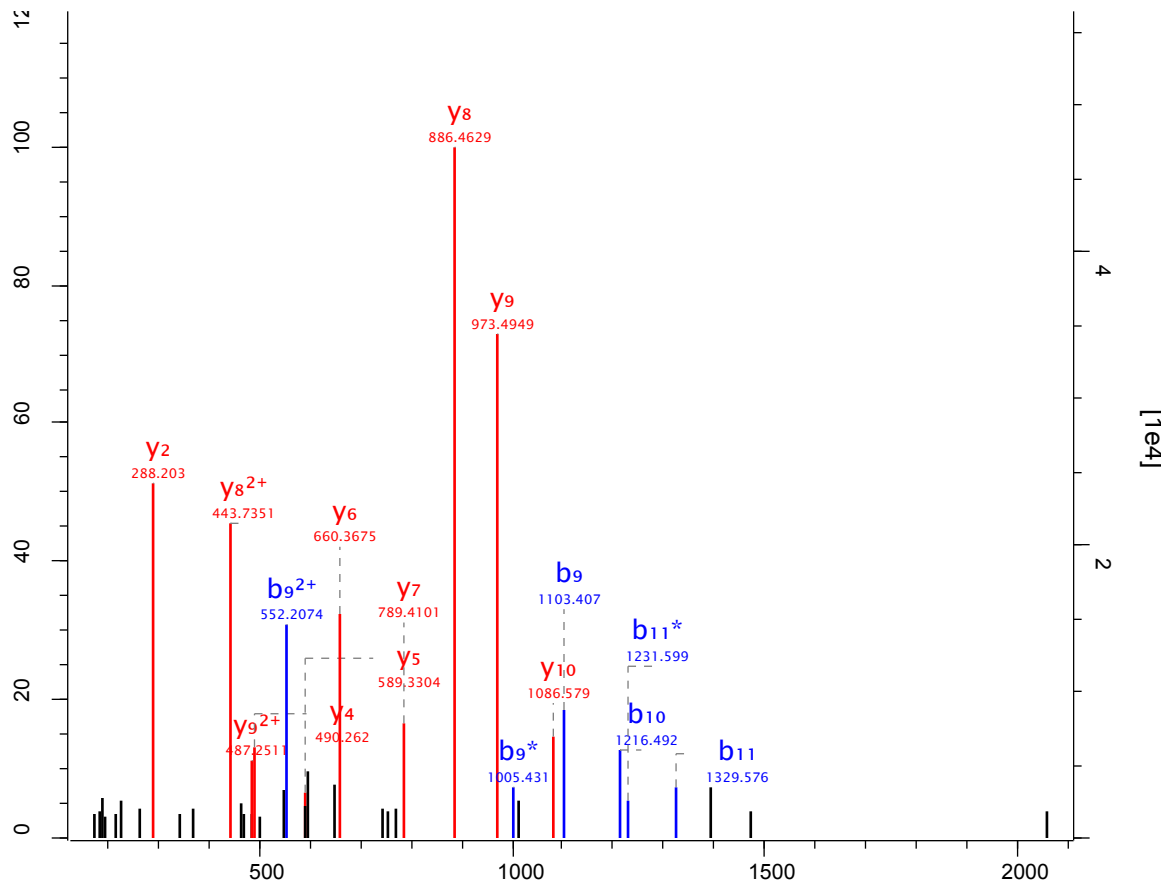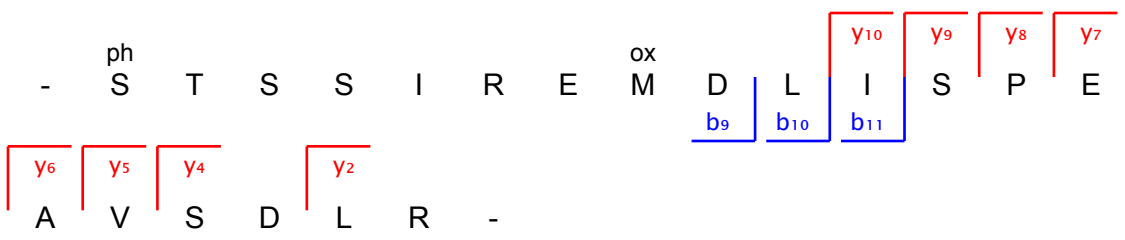

Raw file  
 2013\_COL15\_34\_38\_151128201608

Scan 2424 Method FTMS; HCD Score 55.44 m/z 562.28

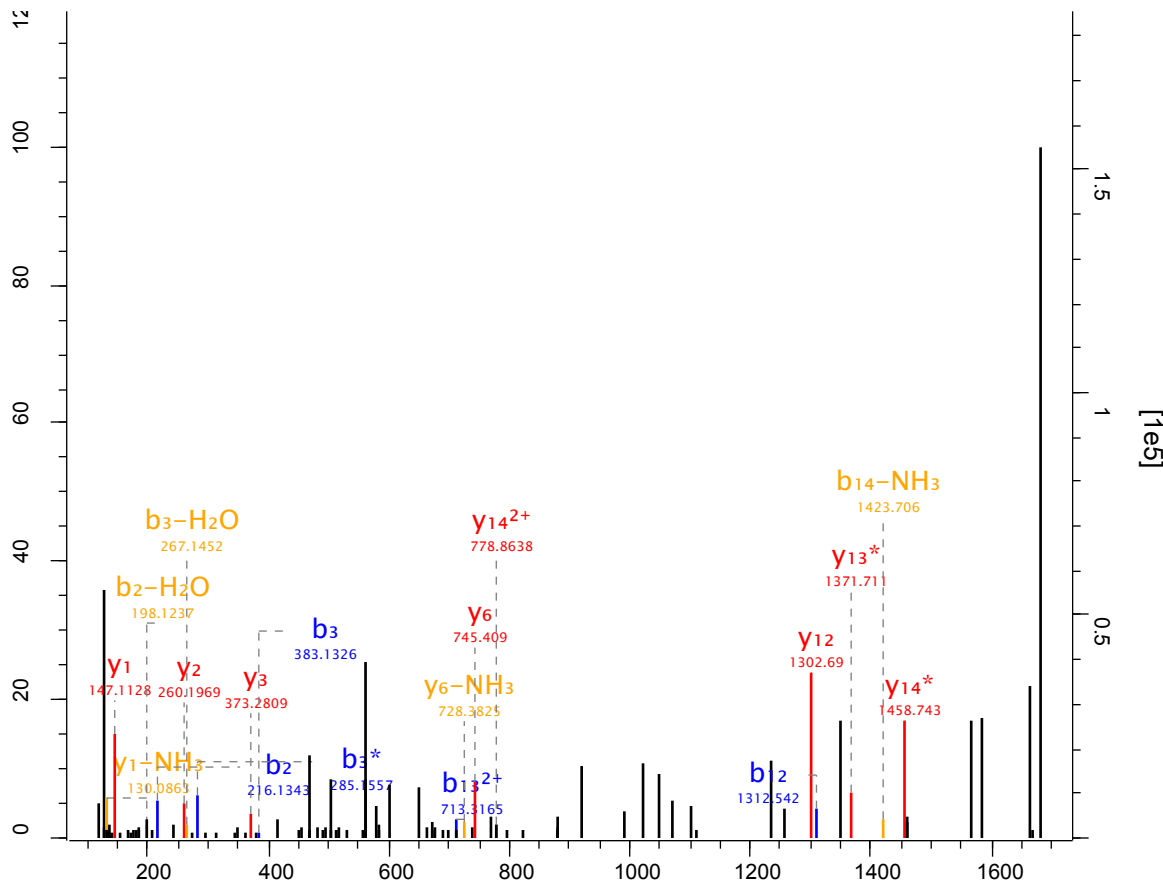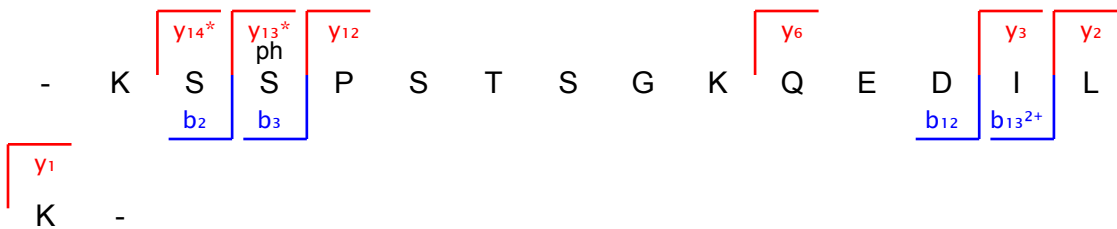

2013\_COL15\_34\_38\_151128201608

24374

FTMS; HCD

77.42

747.32

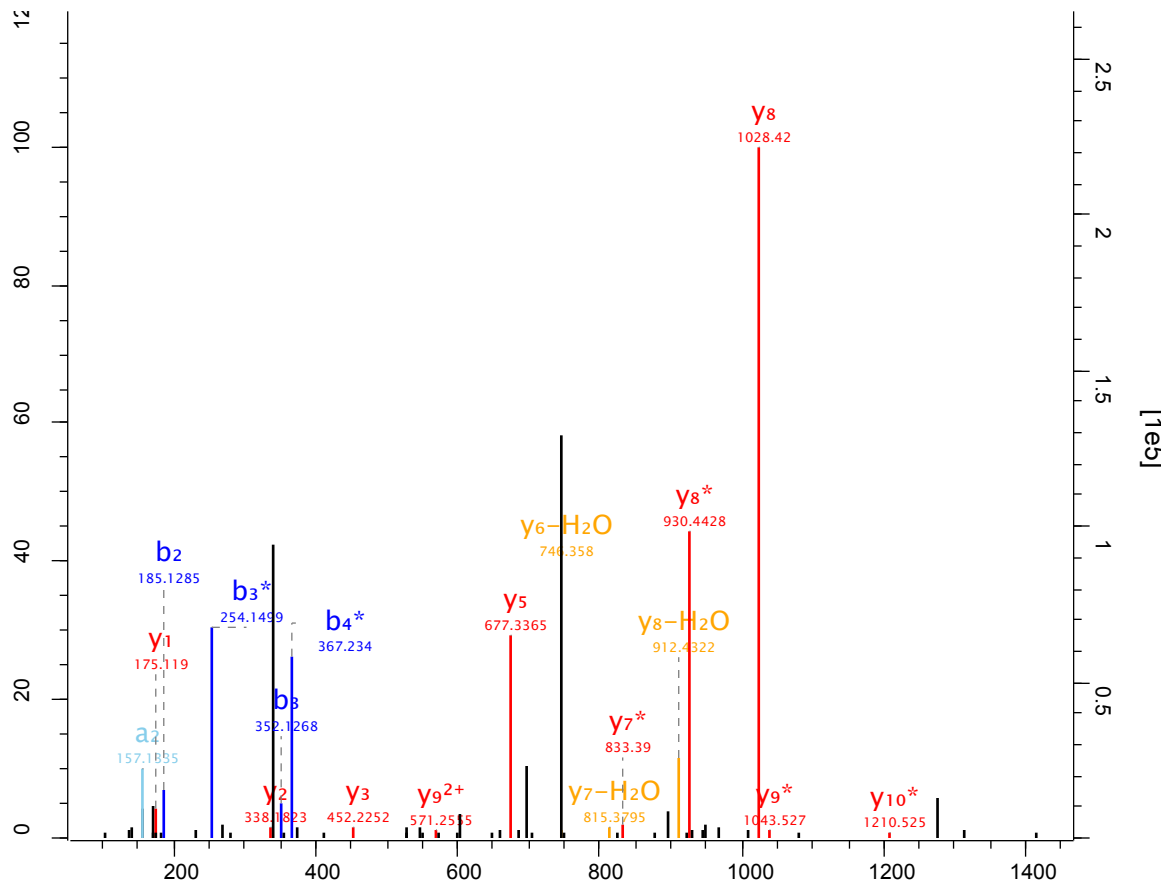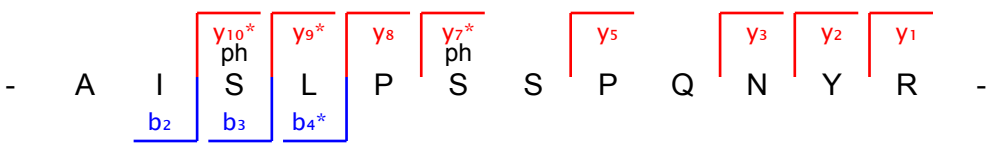

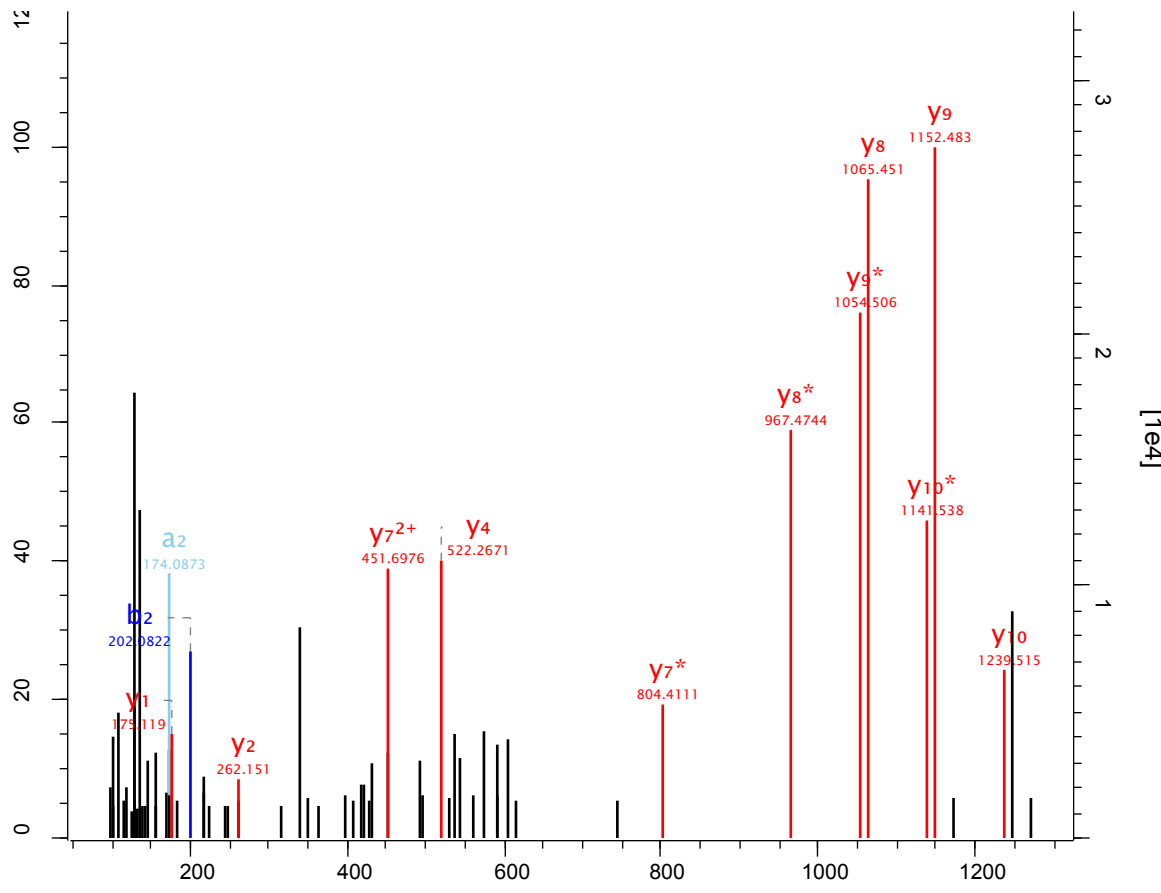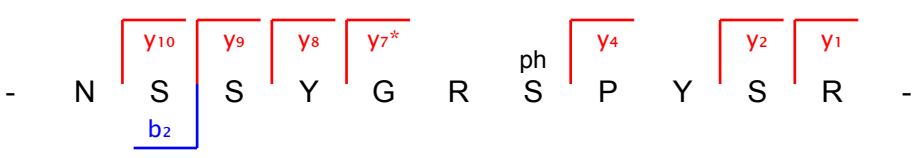

2013\_COL15\_34\_38\_151128201608

24512

FTMS; HCD

72.36

797.36

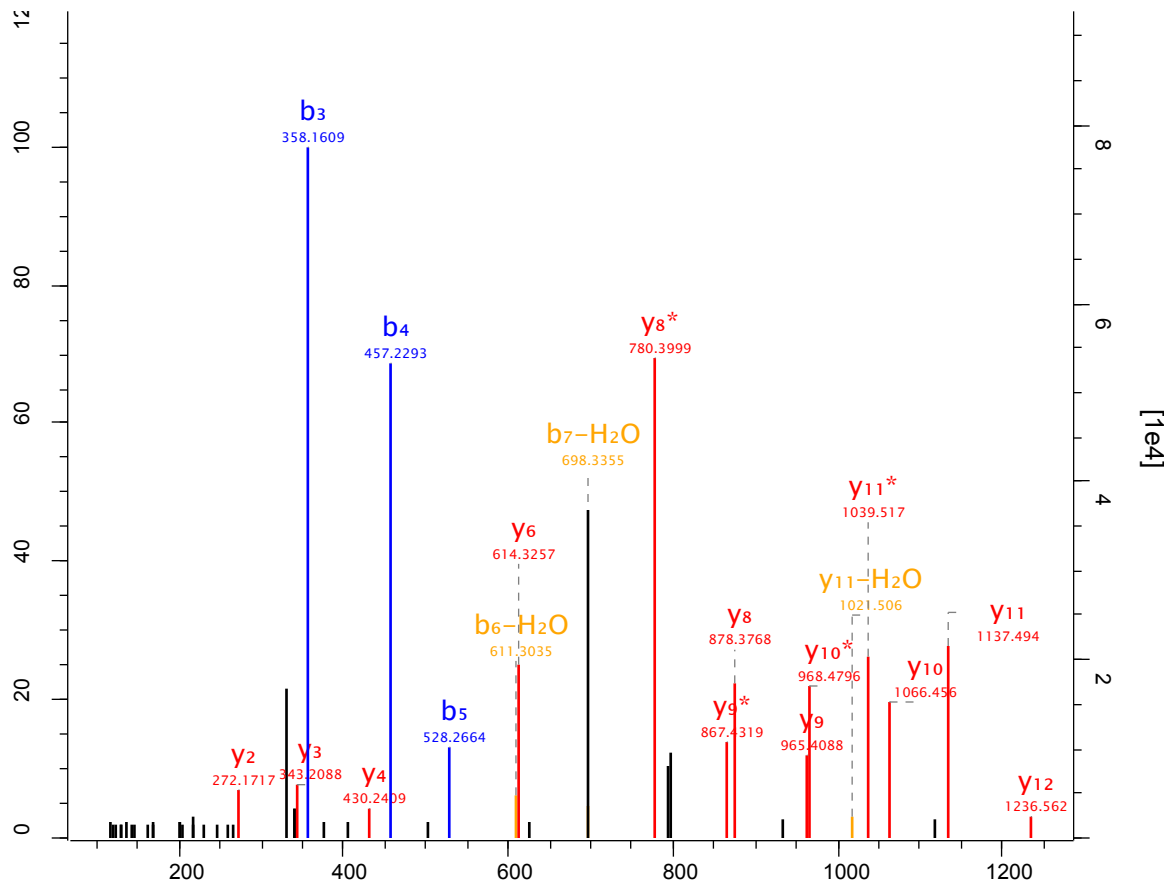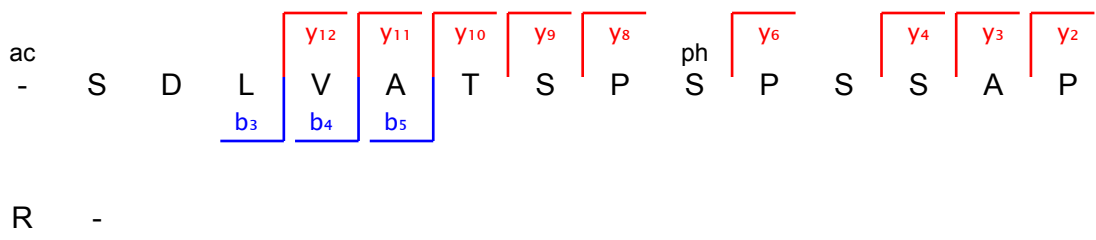

2013\_COL15\_34\_38\_151128201608

24521

FTMS; HCD

150.36

803.66

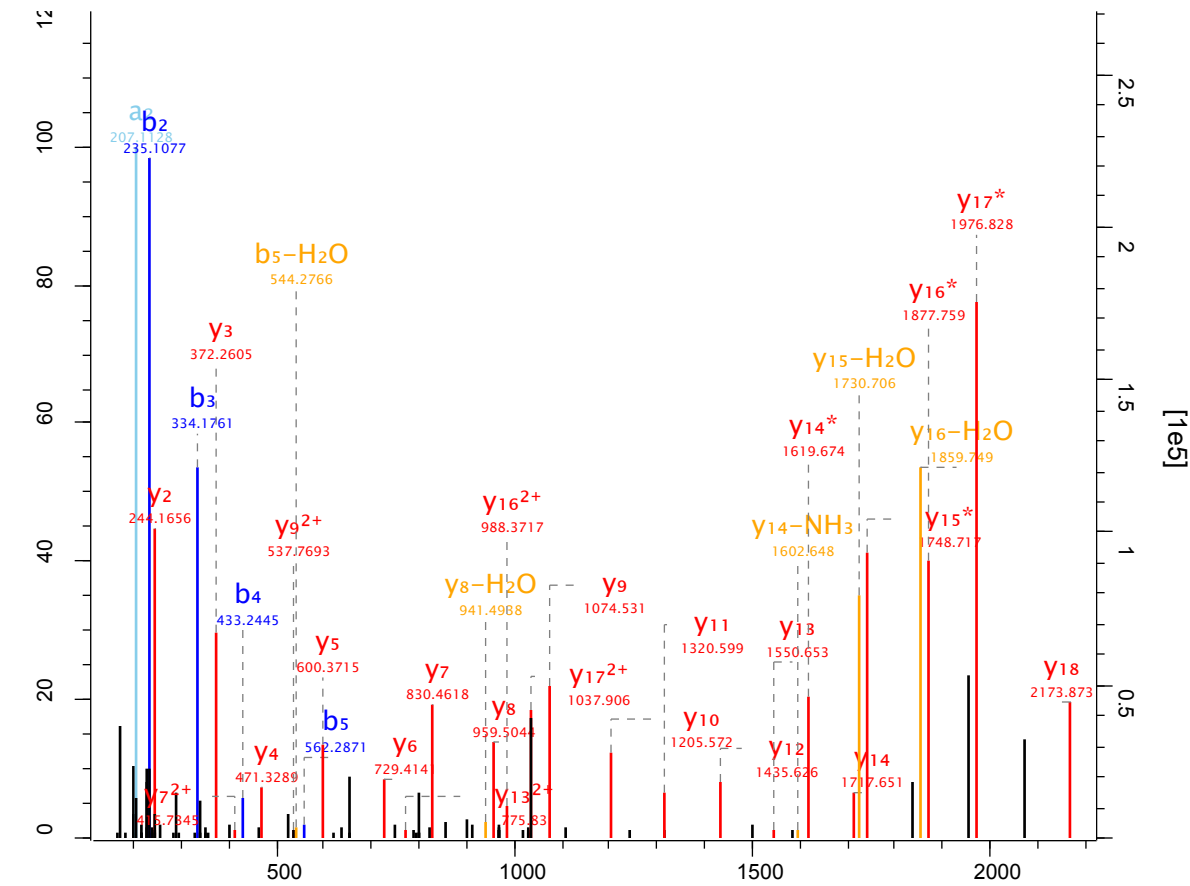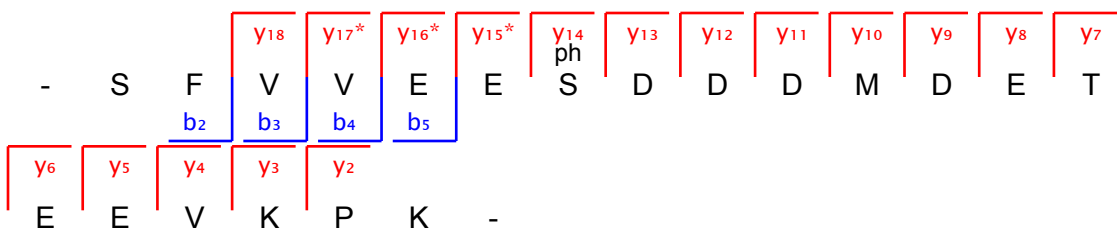

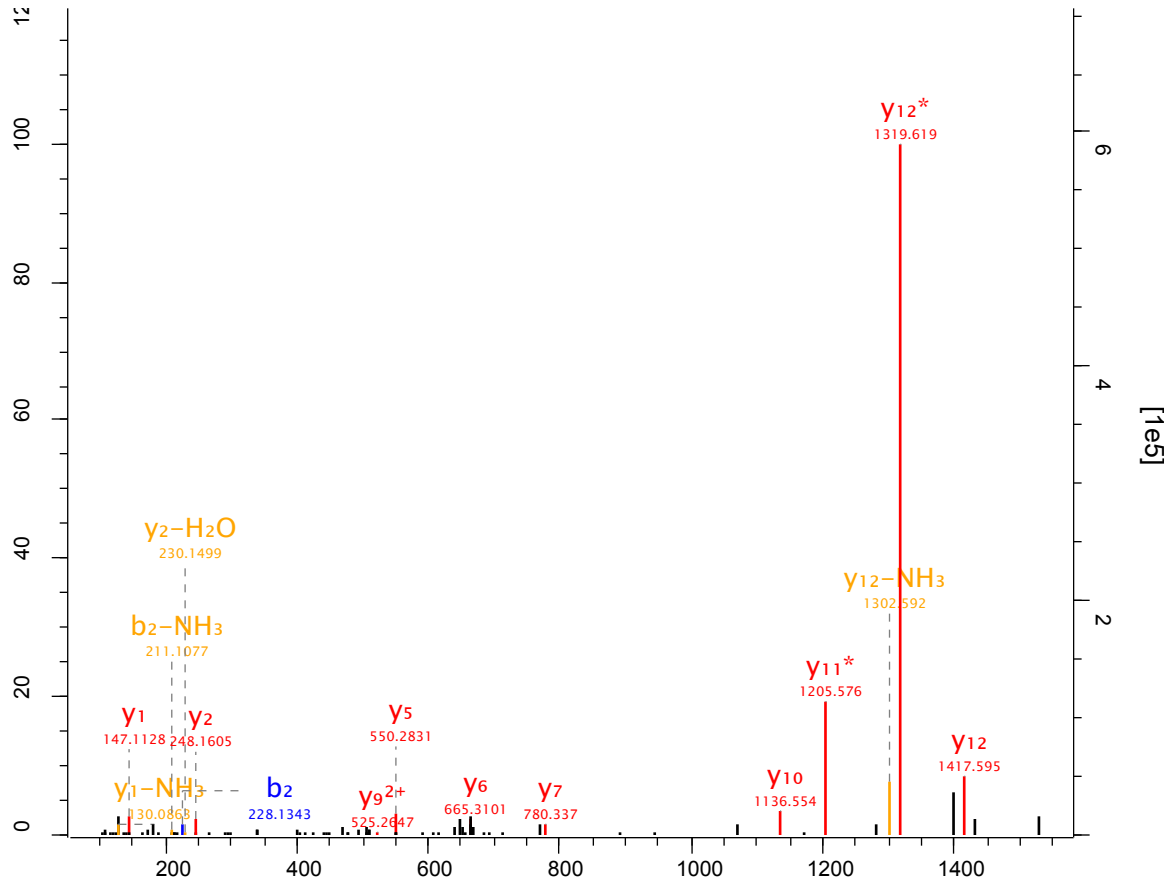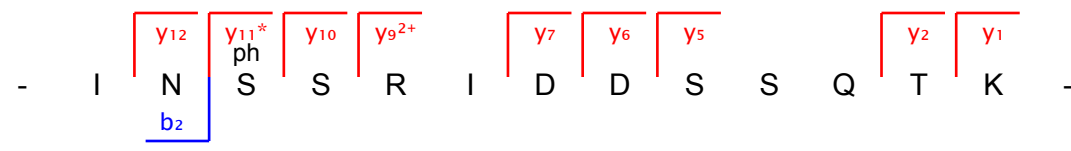

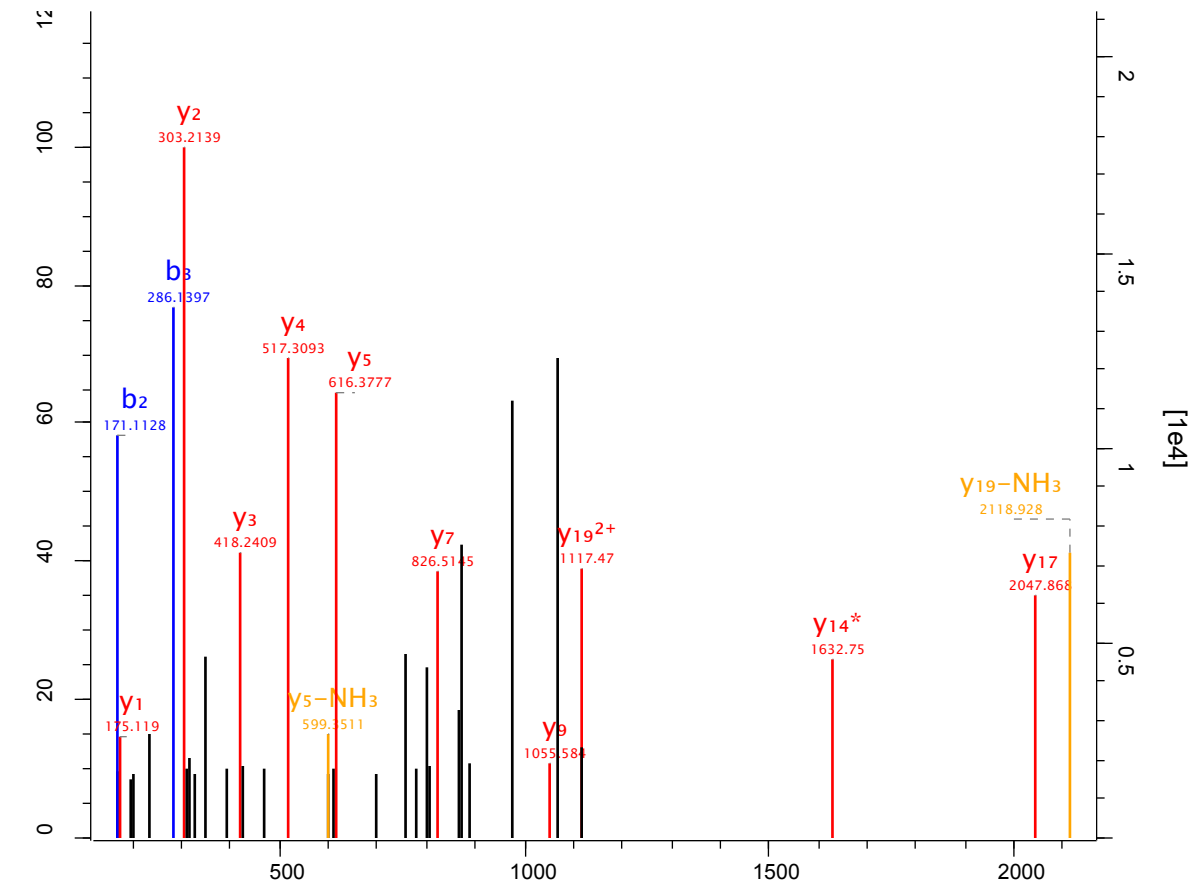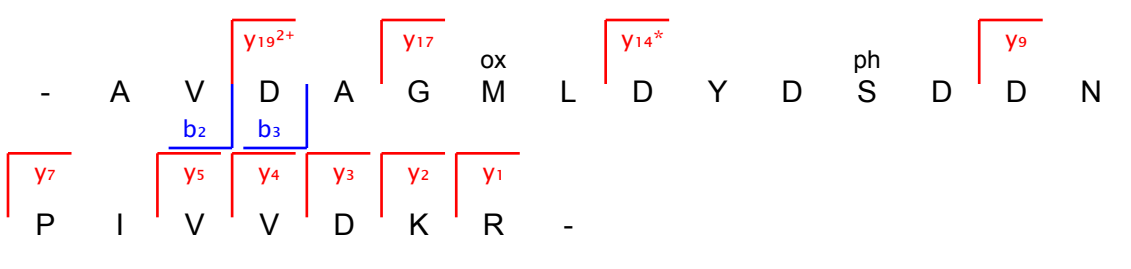



2013\_COL15\_34\_38\_151128201608

25007

FTMS; HCD

79.84

786.39

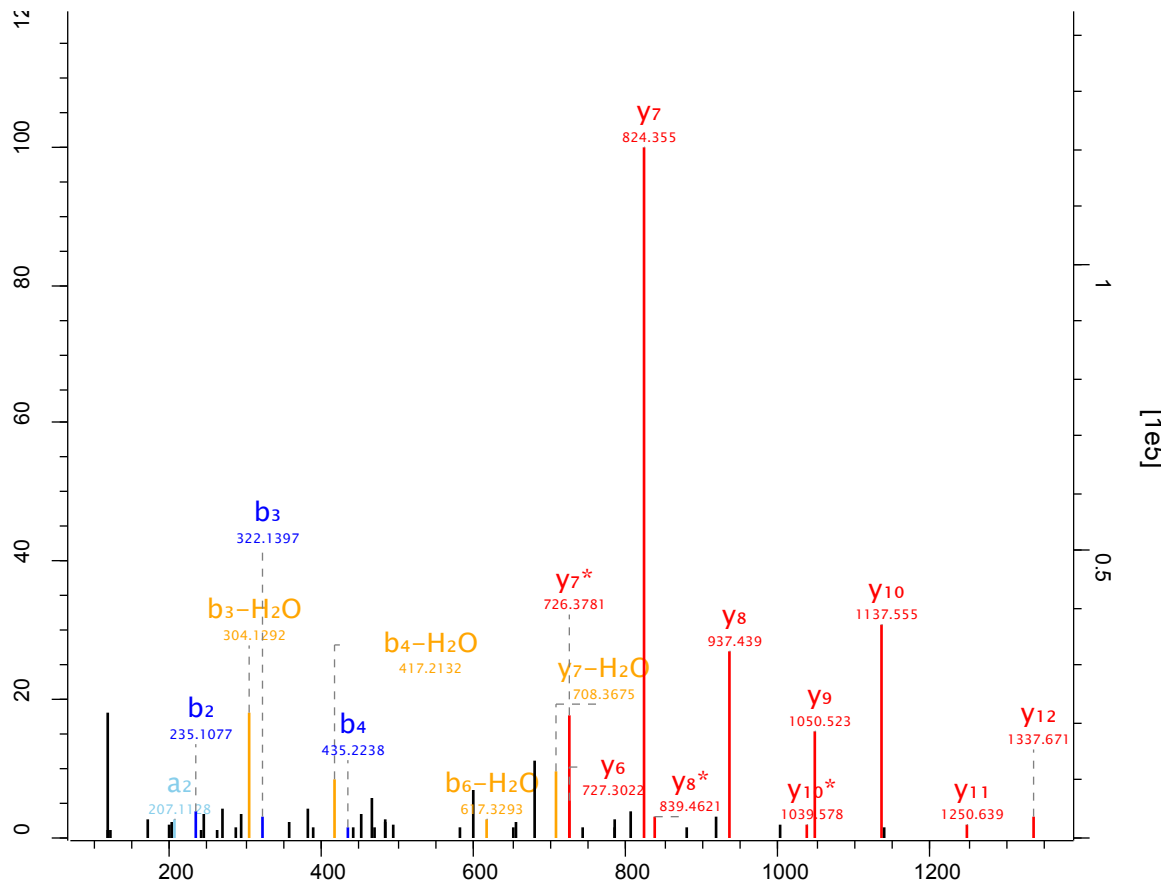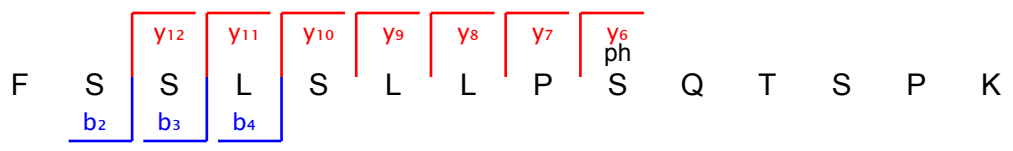

Raw file 2013\_COL15\_34\_38\_151128201608 Scan 2522 Method FTMS; HCD Score 51.59 m/z 523.55

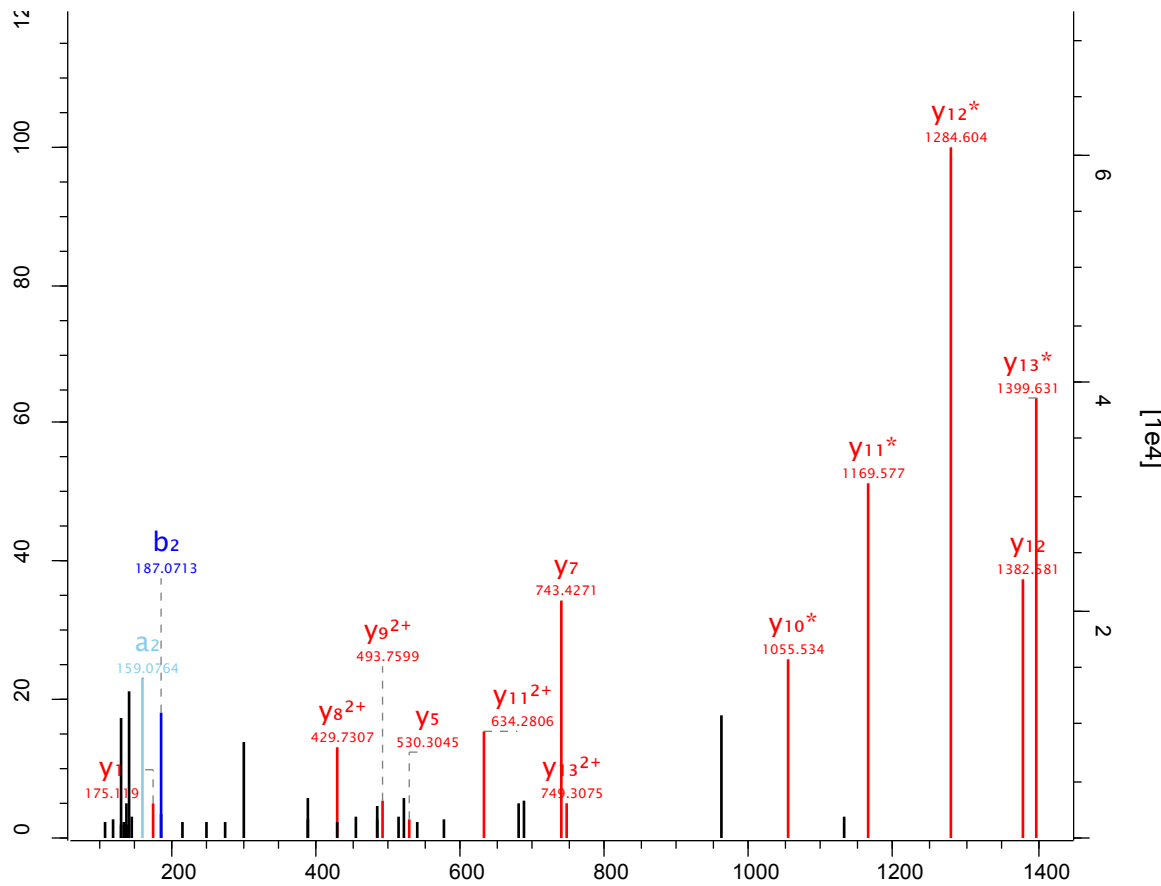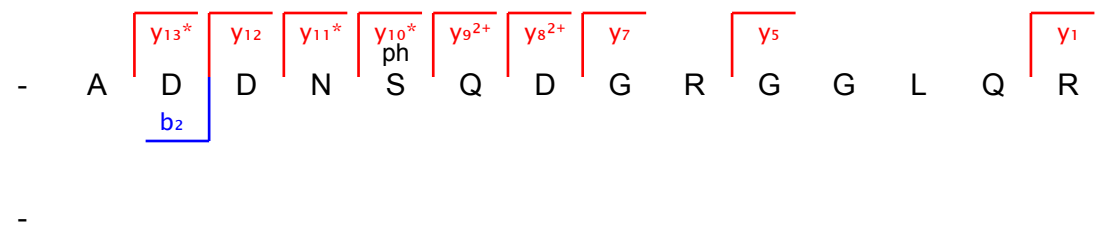

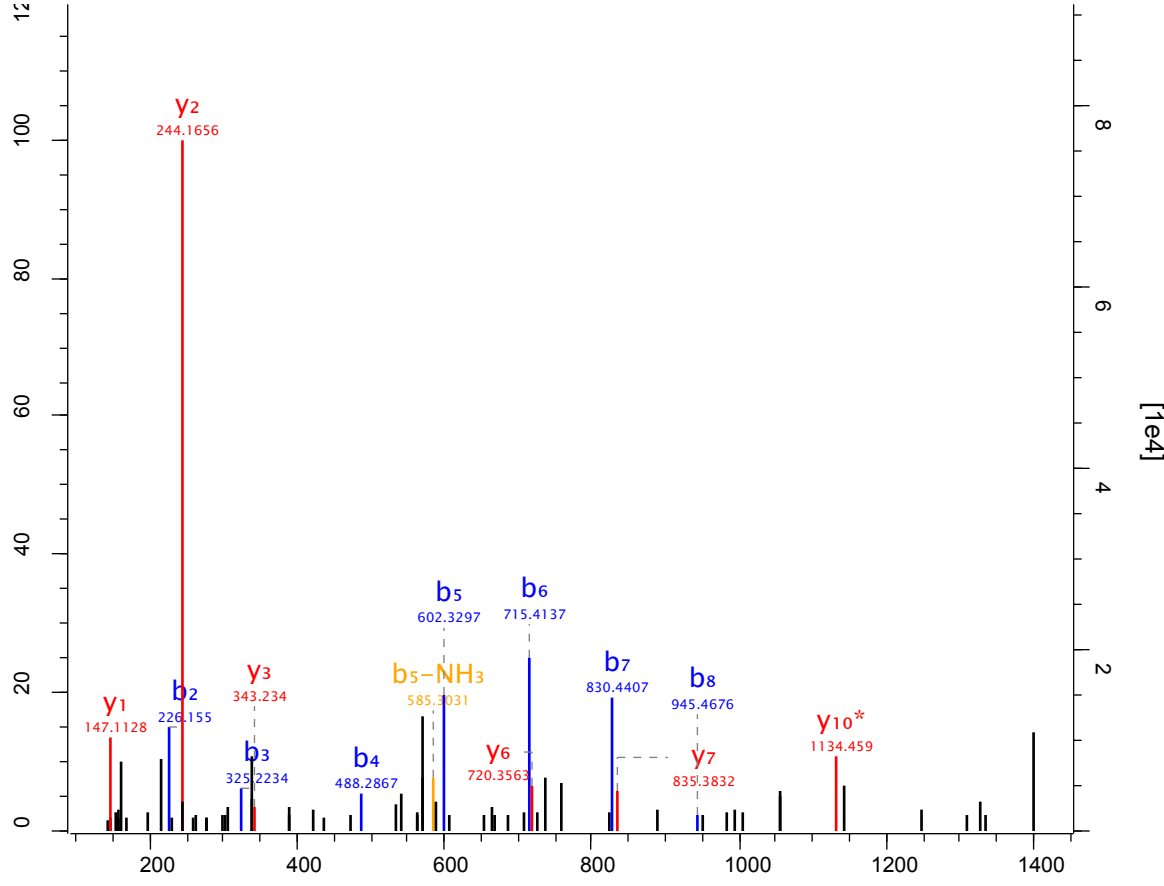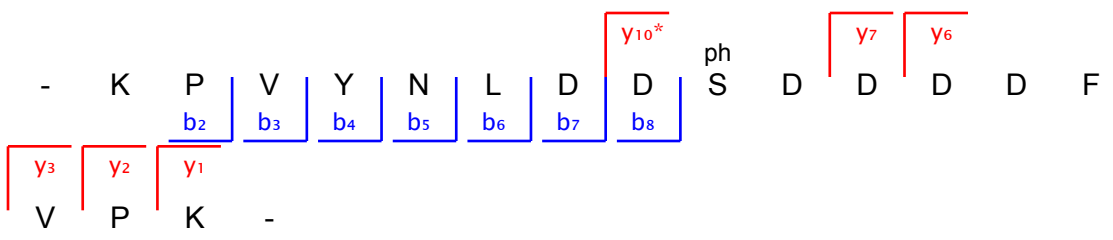

| Raw file                      | Scan  | Method    | Score | m/z    |
|-------------------------------|-------|-----------|-------|--------|
| 2013_COL15_34_38_151128201608 | 25386 | FTMS; HCD | 90.48 | 764.99 |

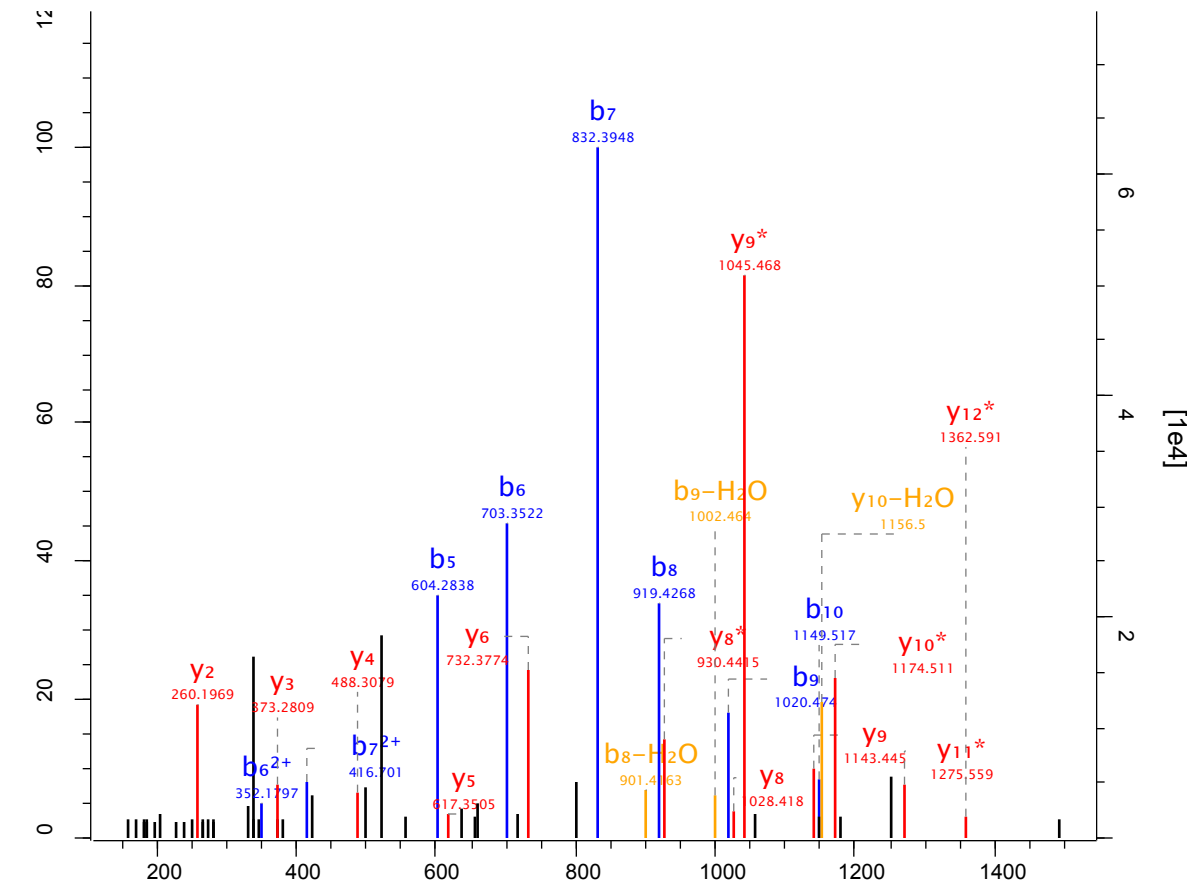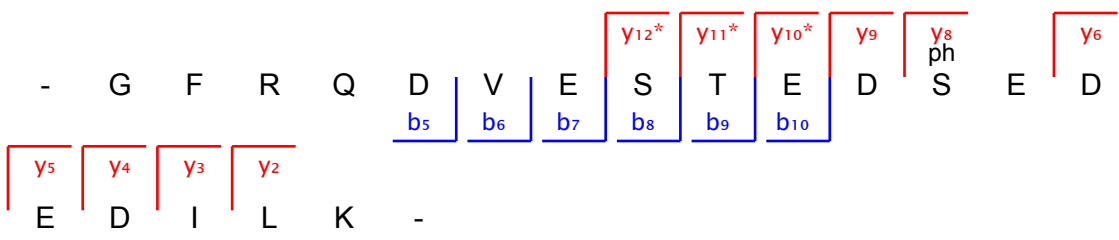

2013\_COL15\_34\_38\_151128201608

25456

FTMS; HCD

145.04

741.36

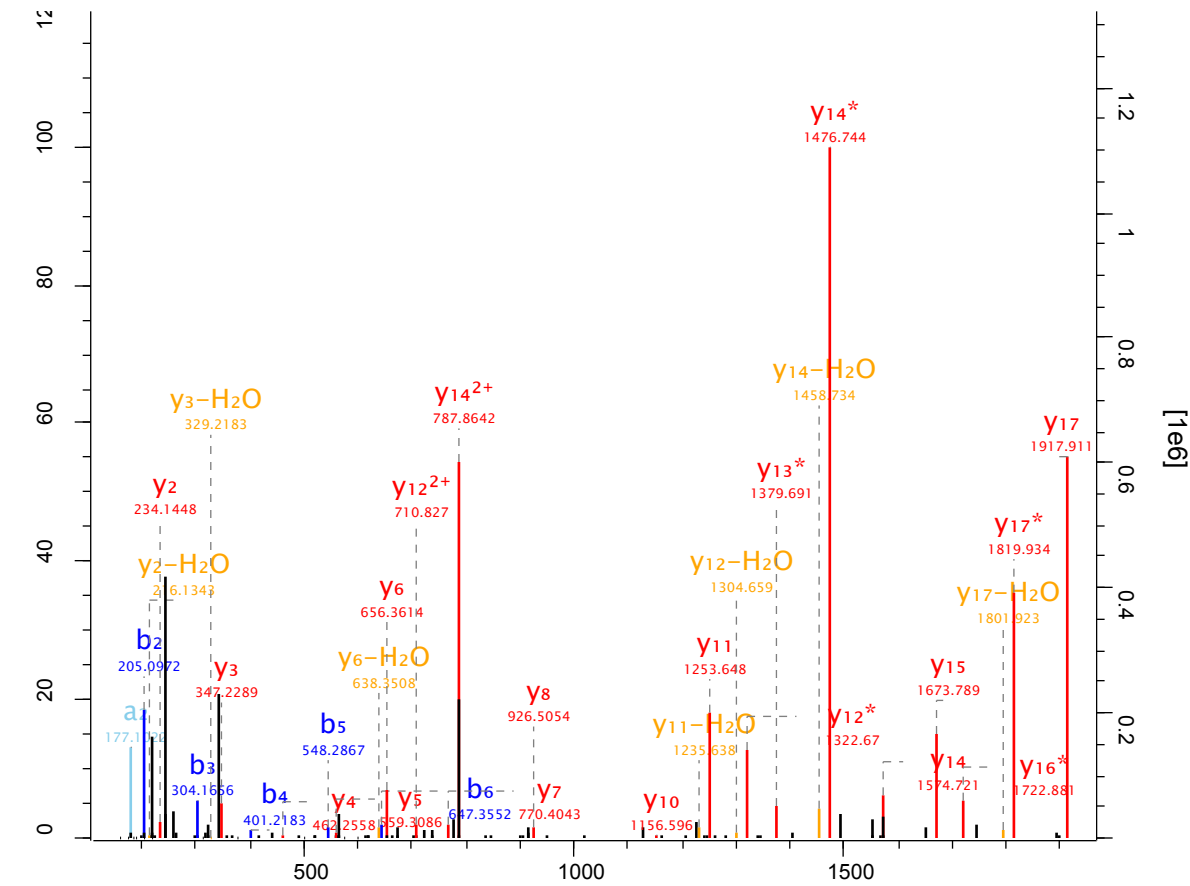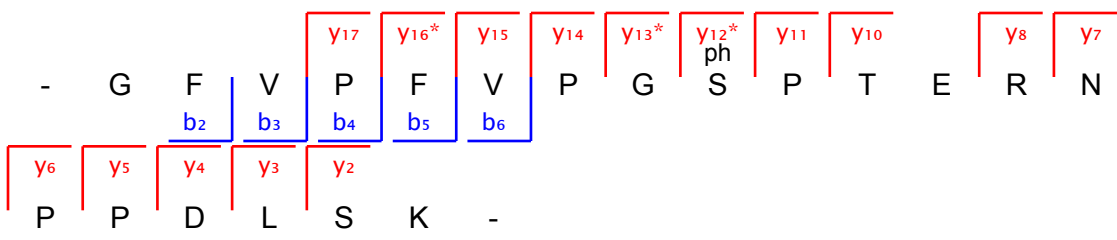

2013\_COL15\_34\_38\_151128201608

25615

FTMS; HCD

130.27

728.3

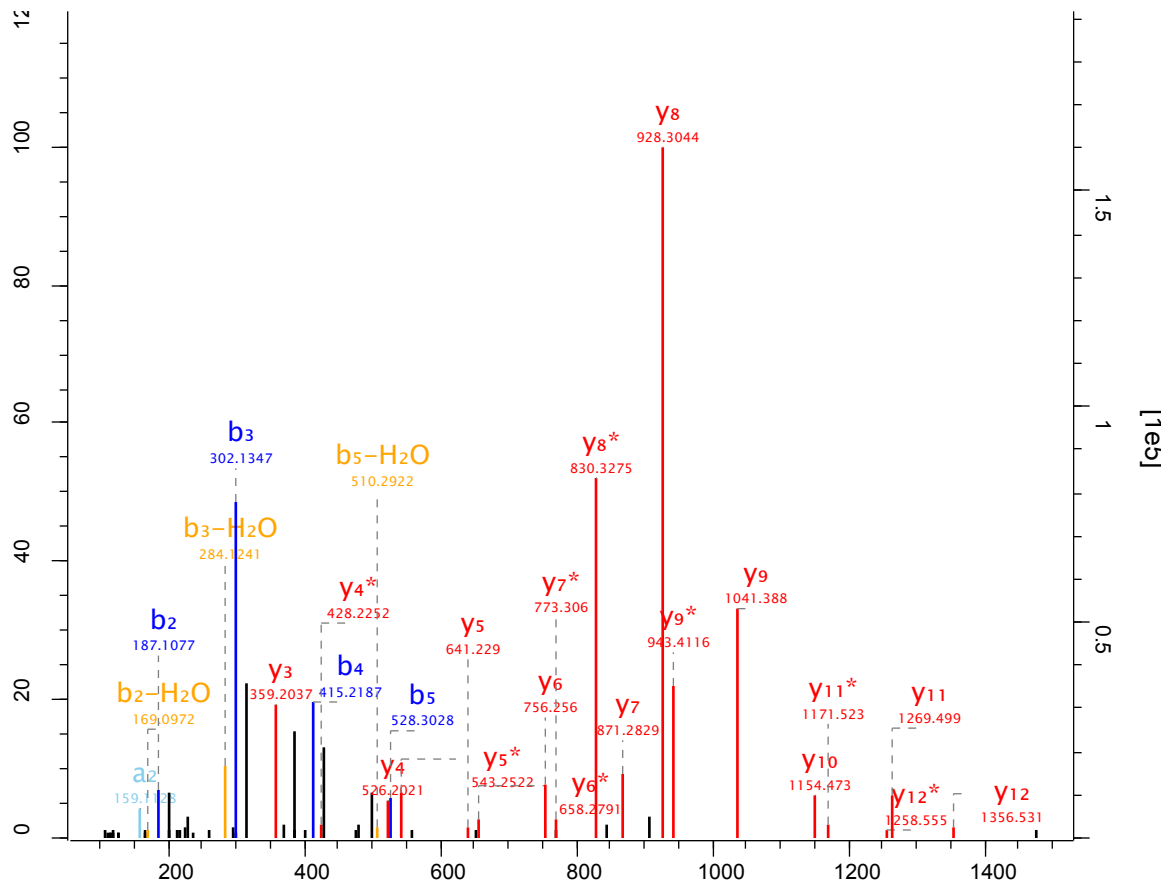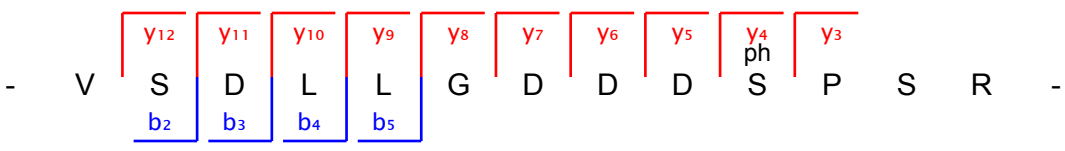

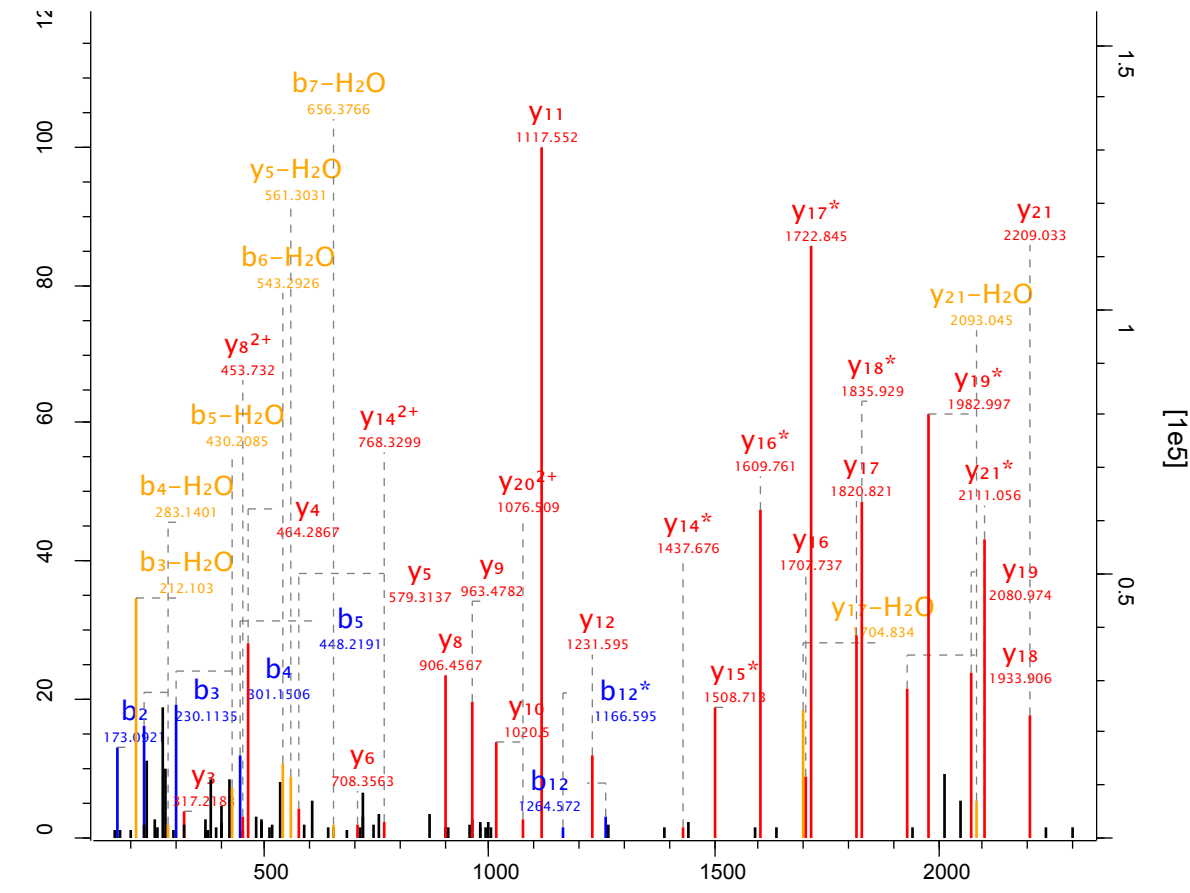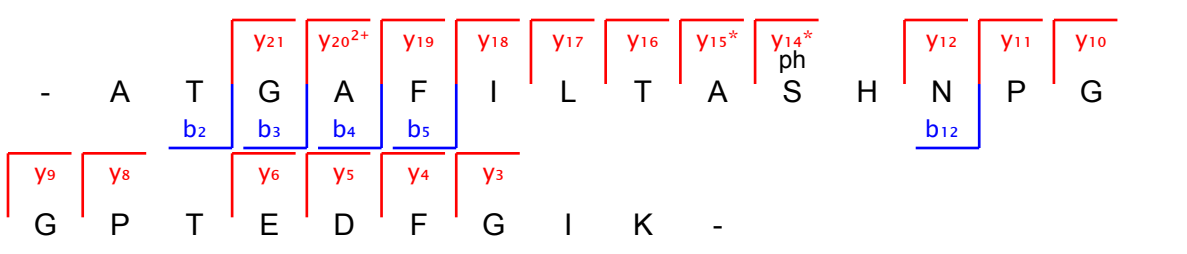

2013\_COL15\_34\_38\_151128201608

25717

FTMS; HCD

42.64

868.41

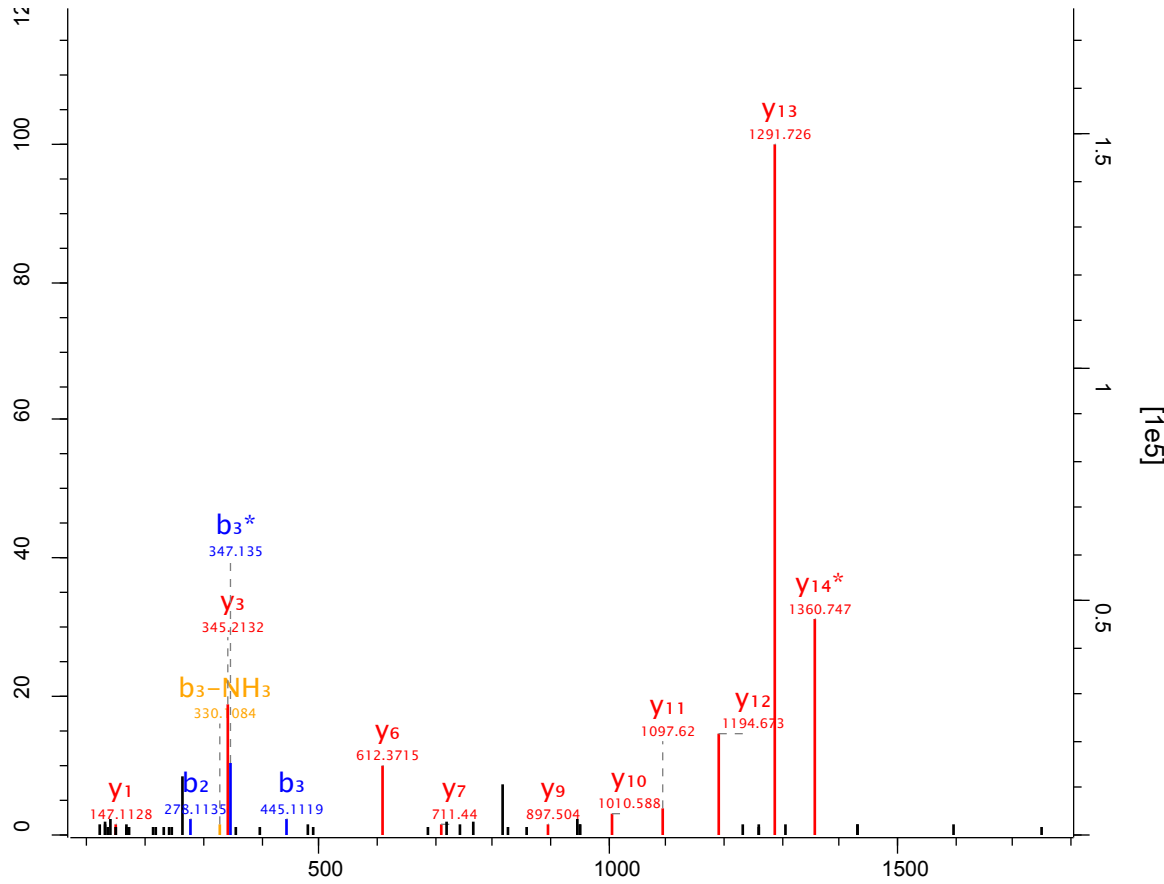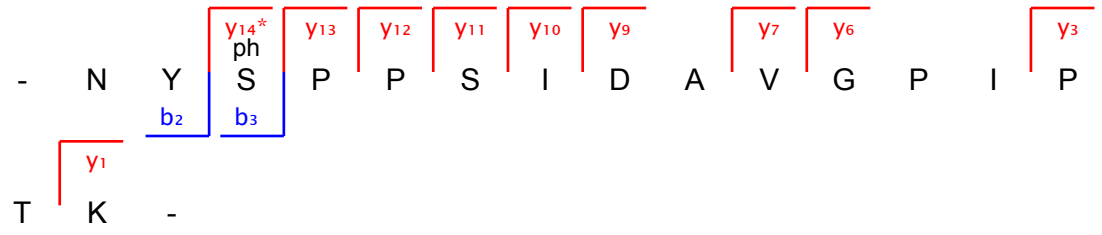



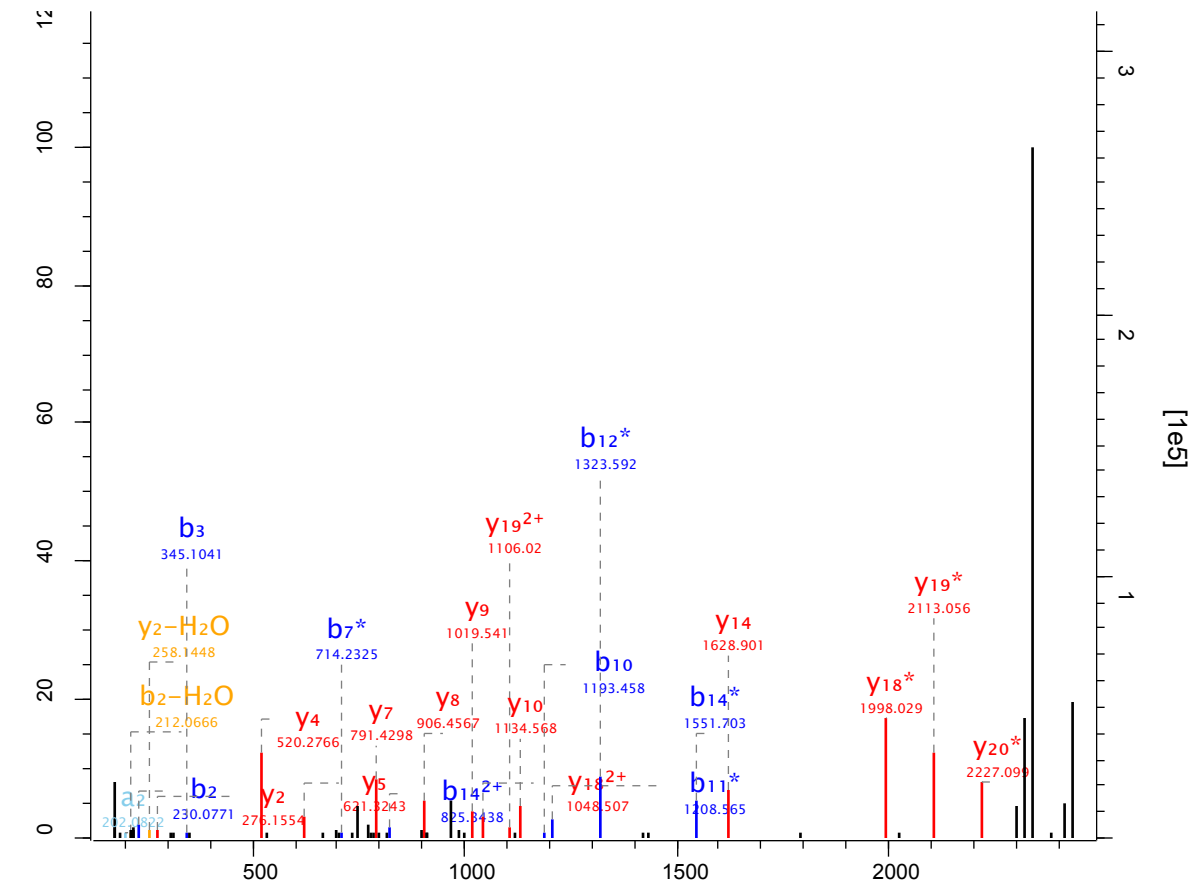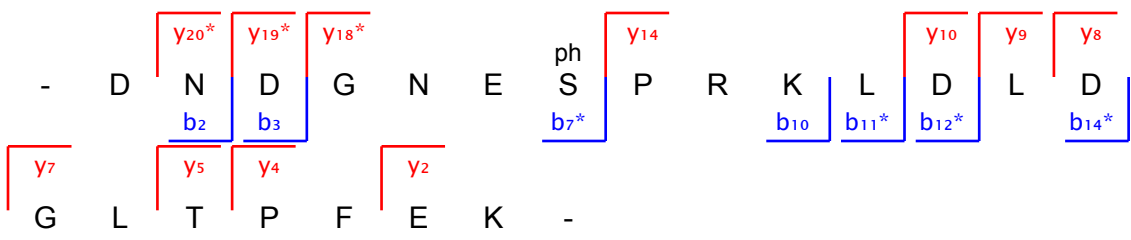

2013\_COL15\_34\_38\_151128201608

25960

FTMS; HCD

119.8

928.42

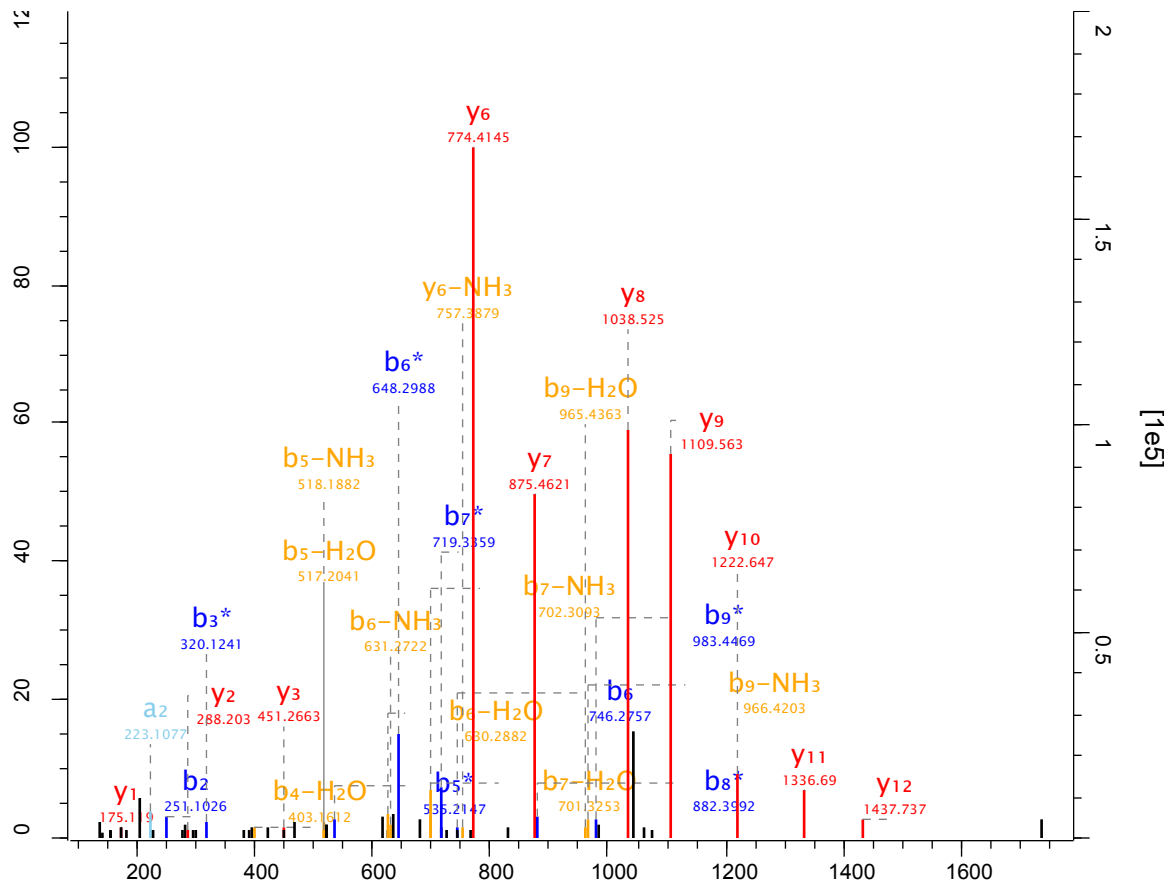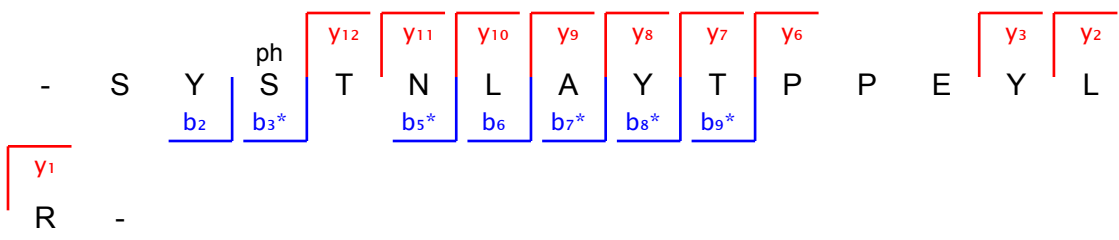

2013\_COL15\_34\_38\_151128201608

26190

FTMS; HCD

105.5

792.92

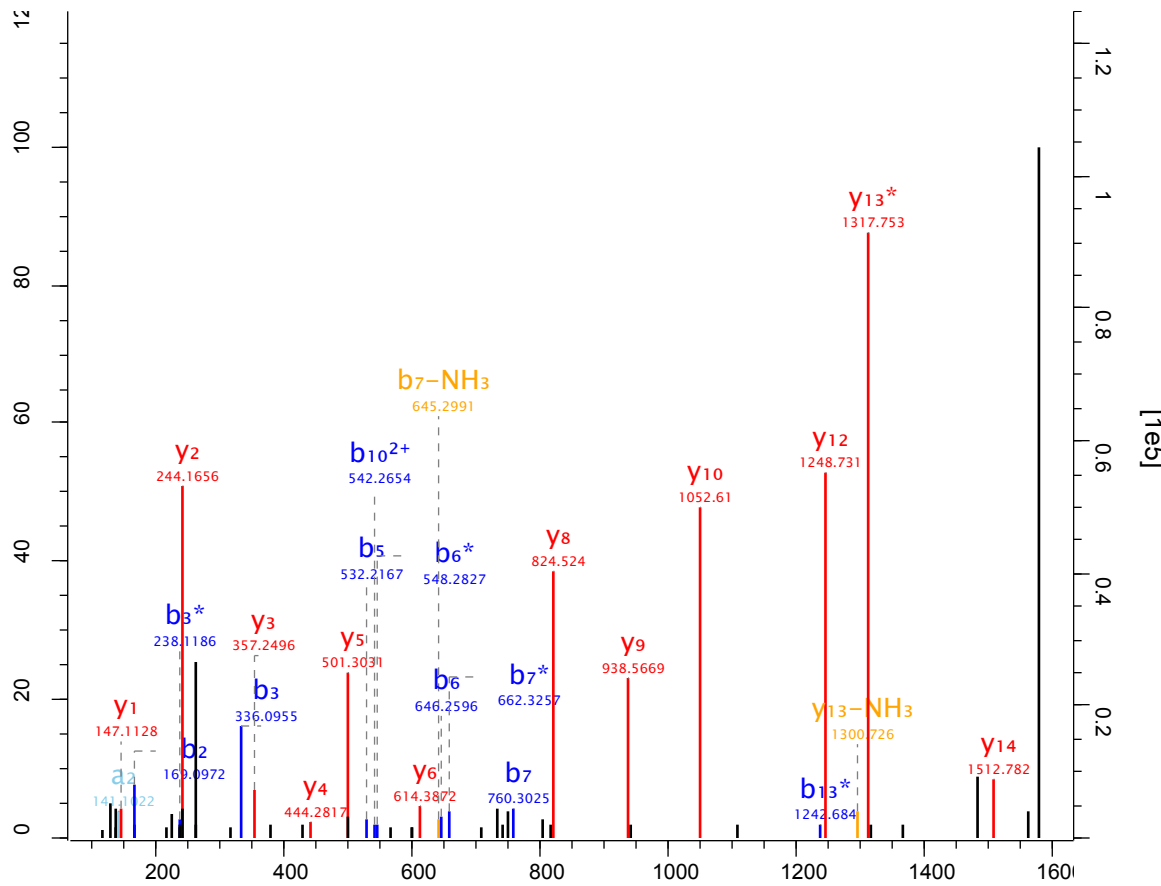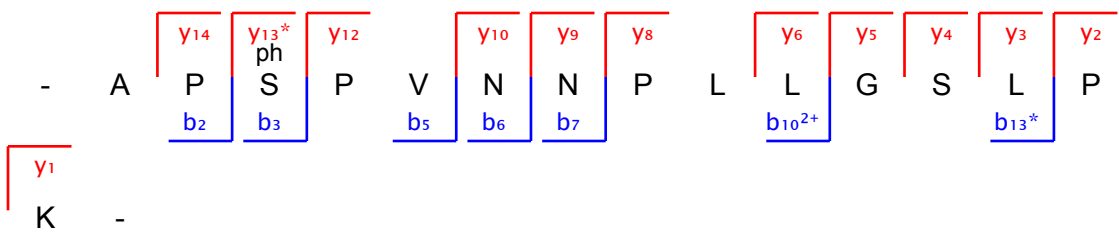

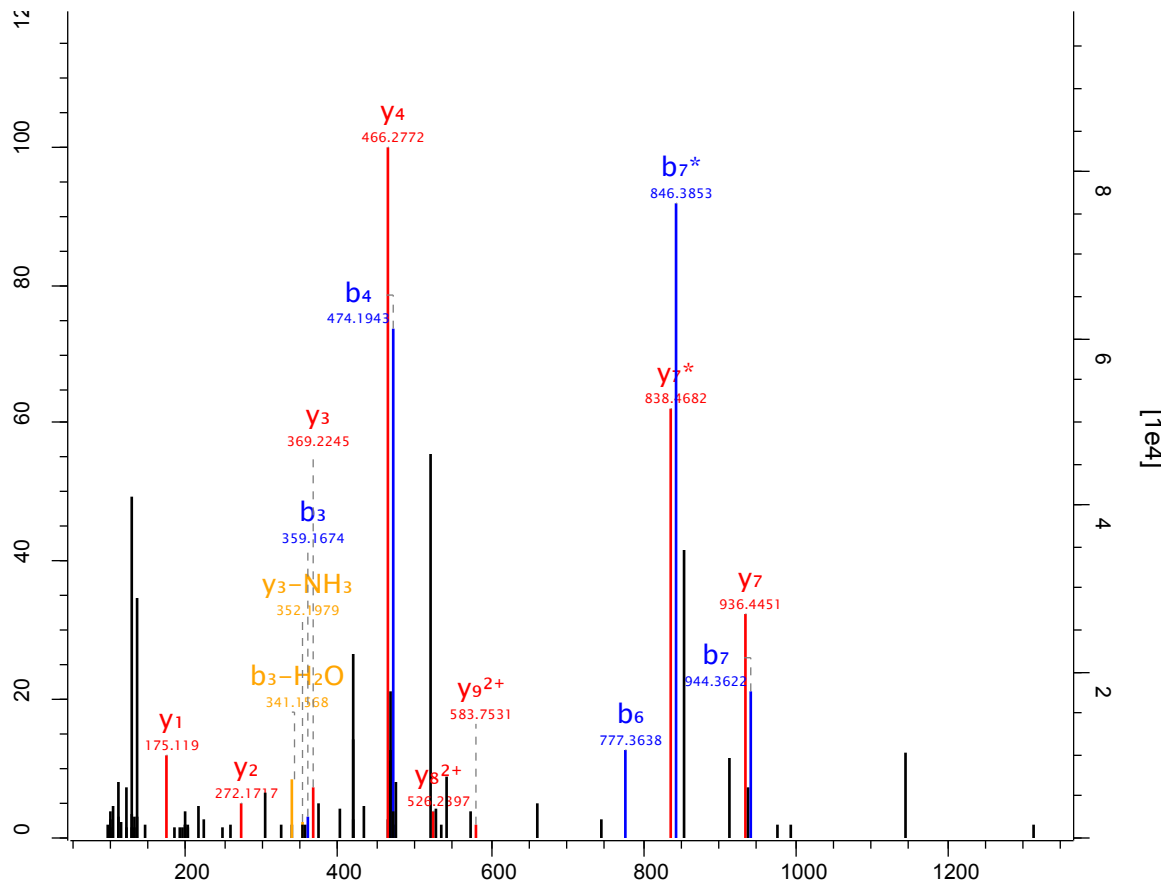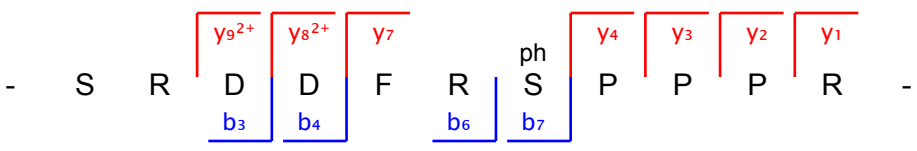

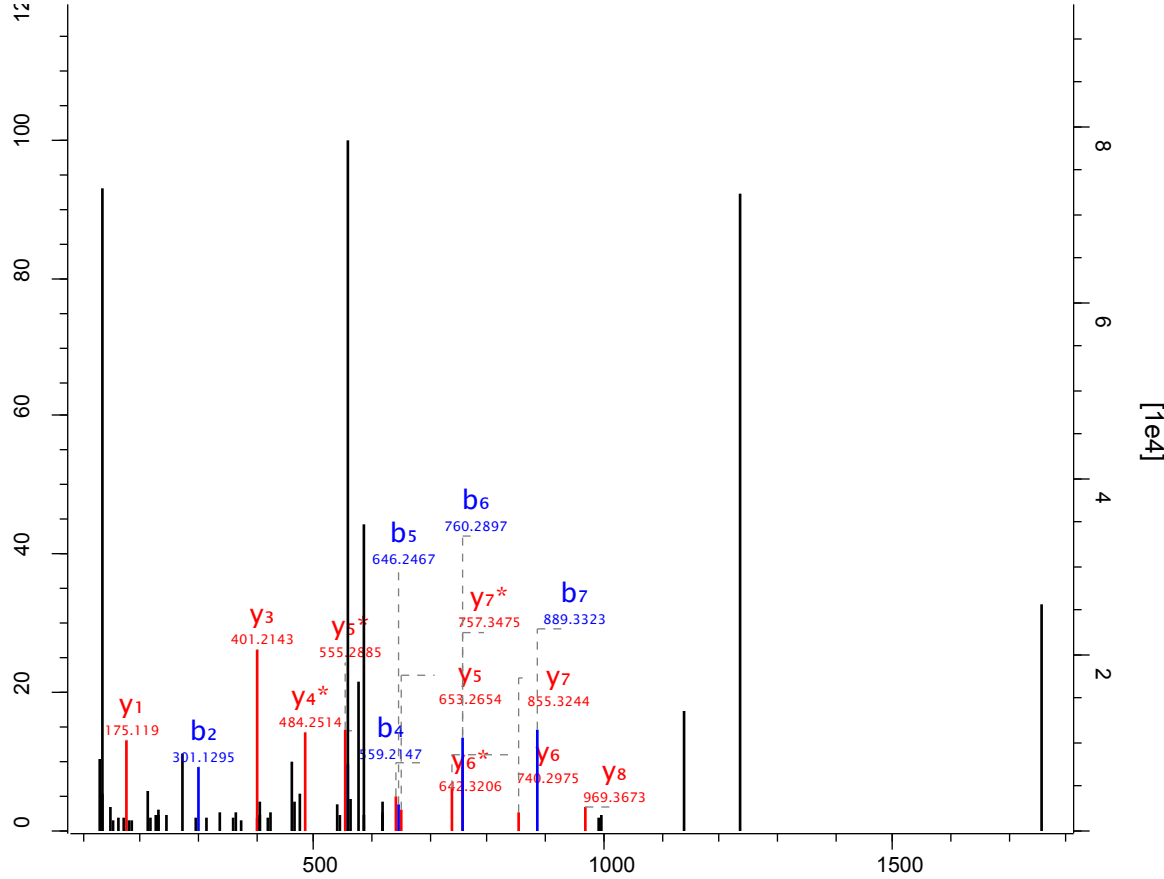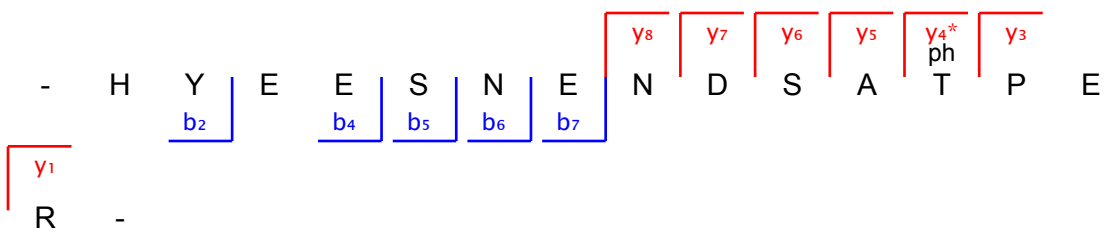

2013\_COL15\_34\_38\_151128201608

26326

FTMS; HCD

85.49

652.78

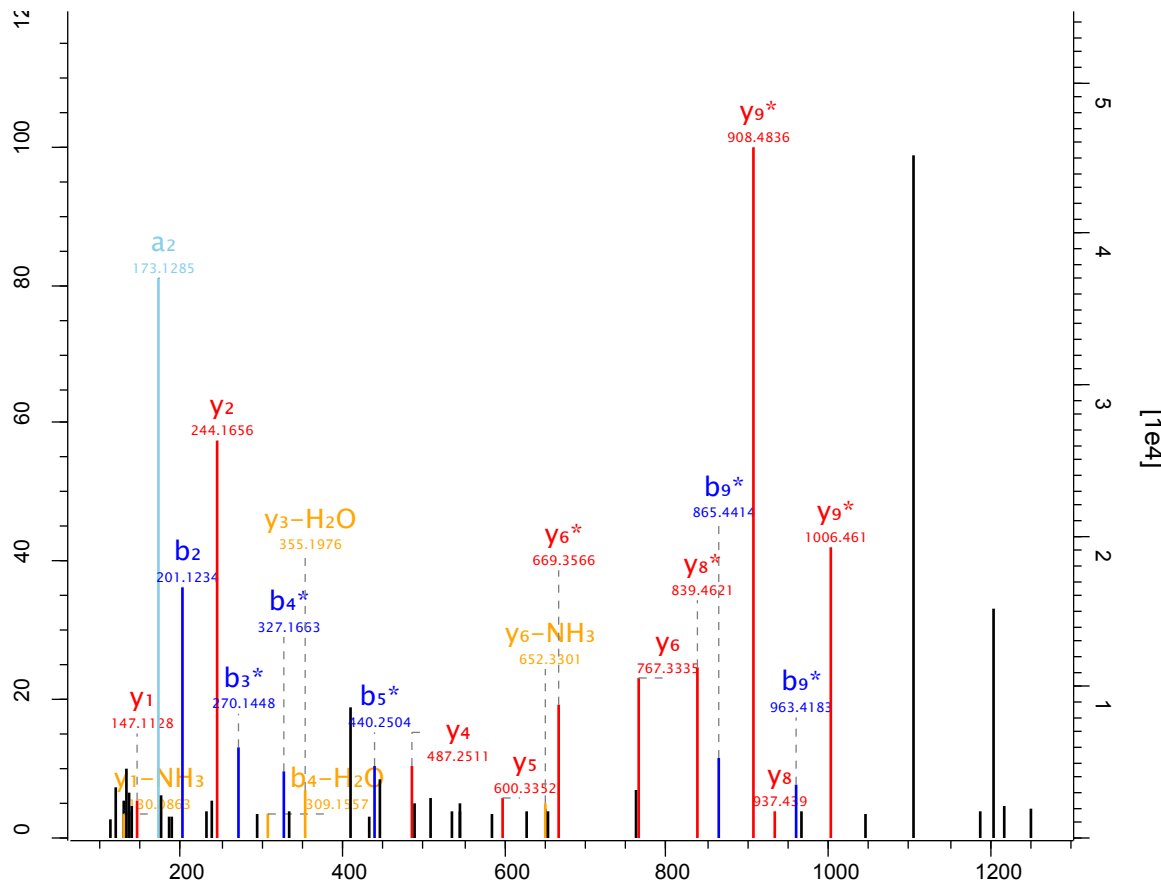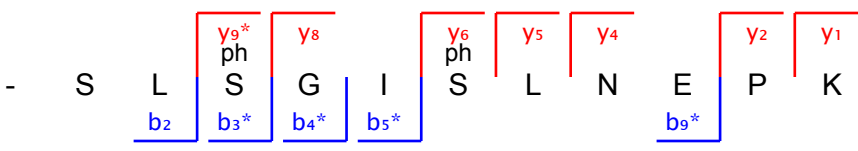

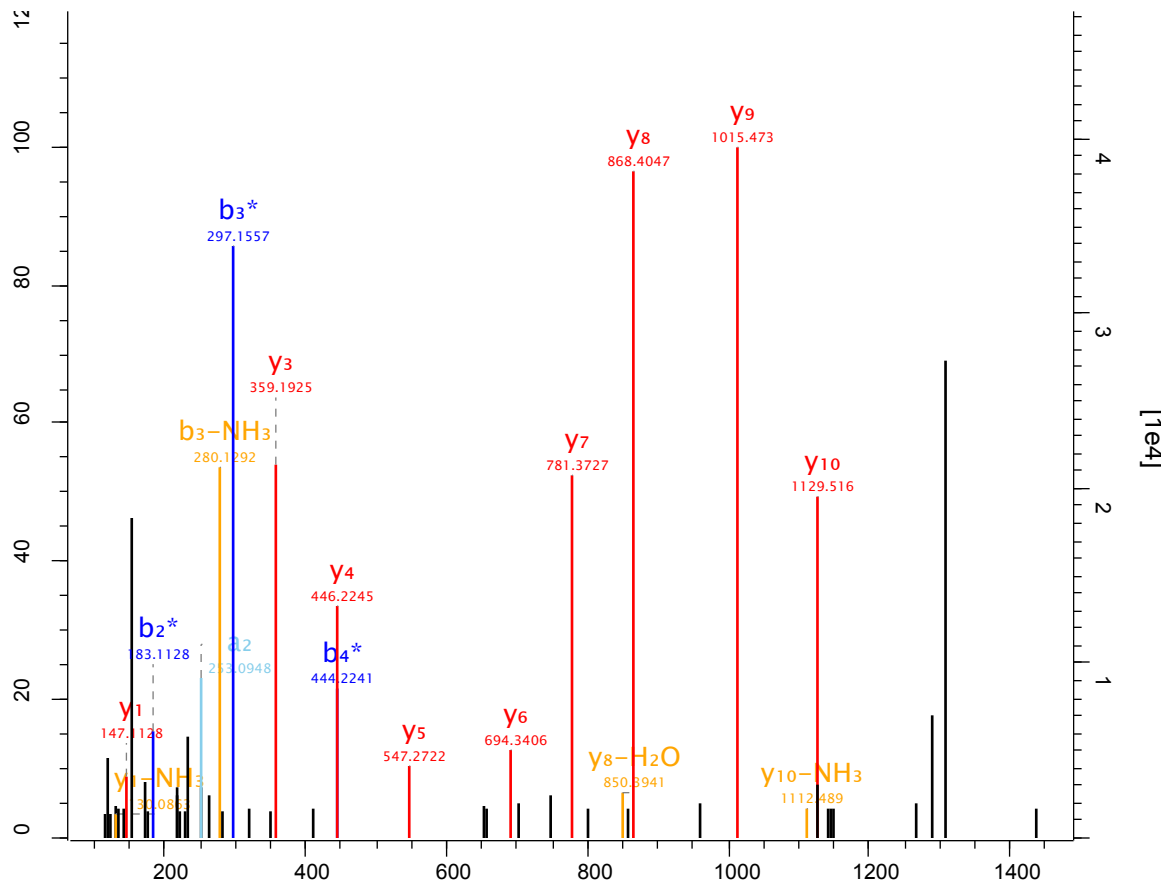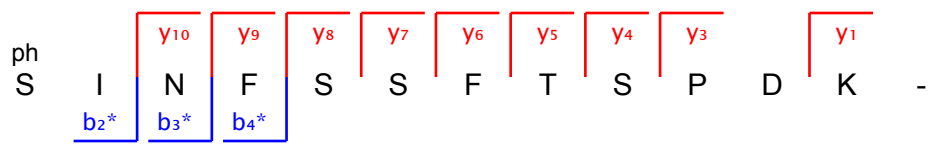

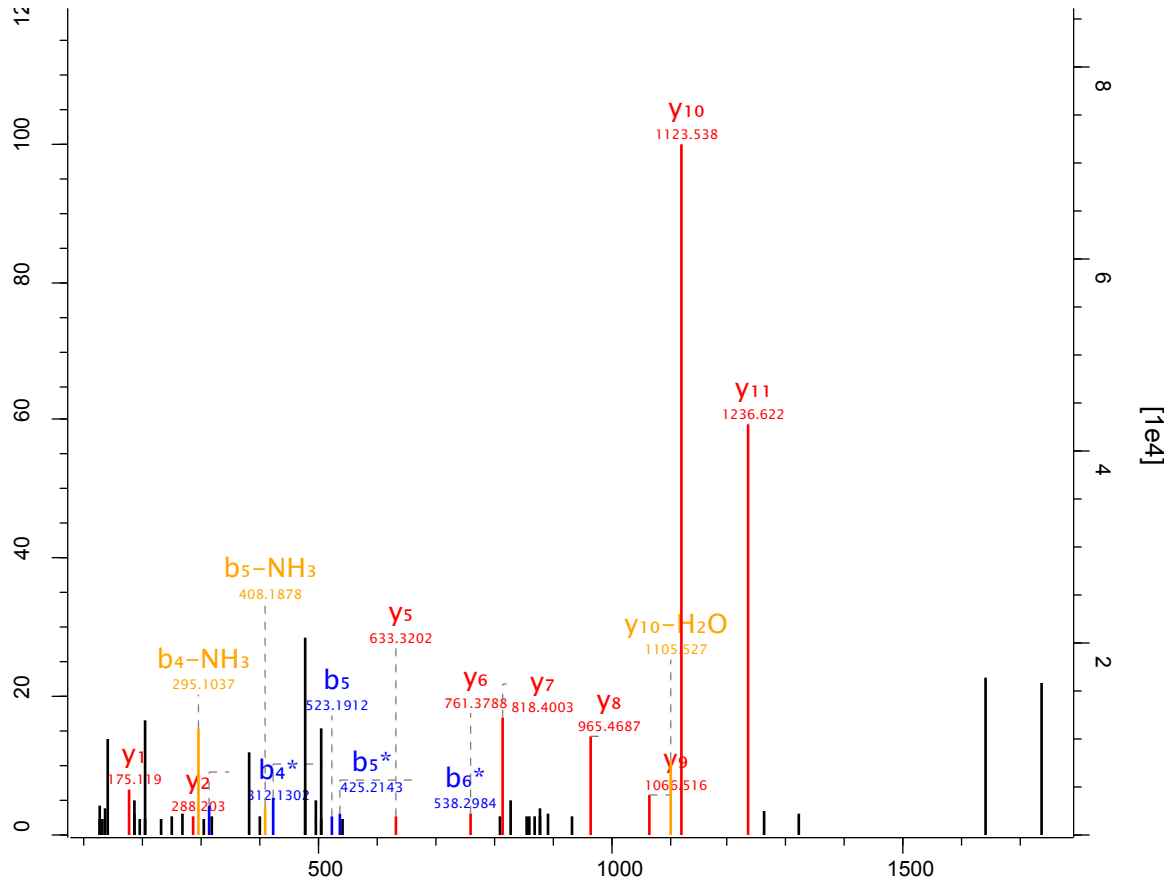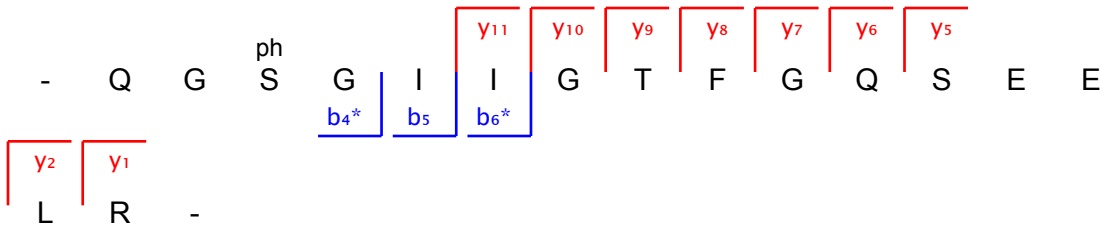



Raw file Scan Method Score m/z  
 2013\_COL15\_34\_38\_151128201608 26524 FTMS; HCD 111.11 664.66

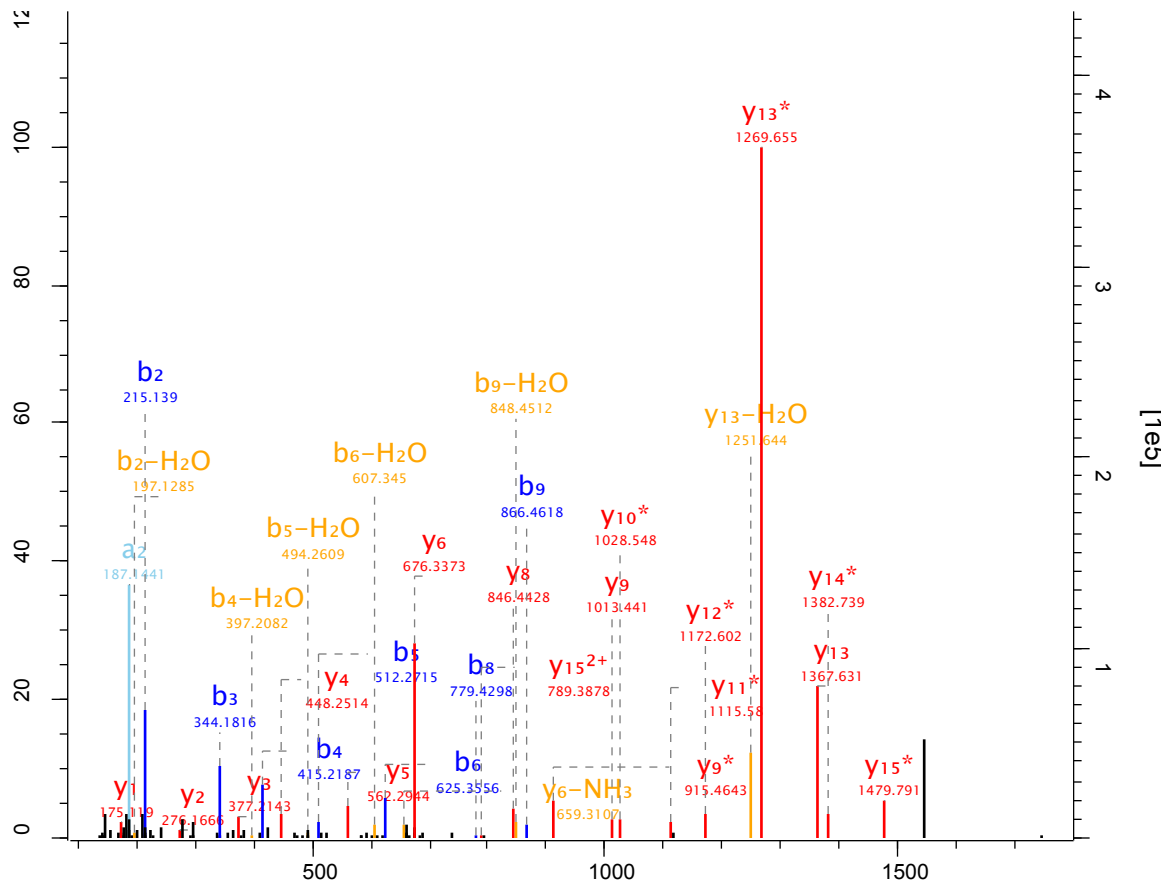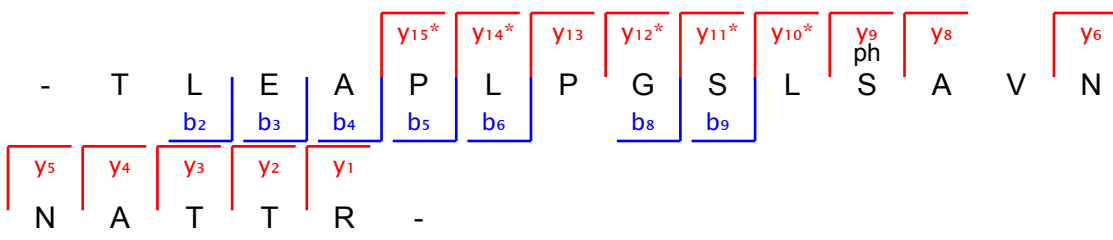

2013\_COL15\_34\_38\_151128201608

26606

FTMS; HCD

50.9

592.76

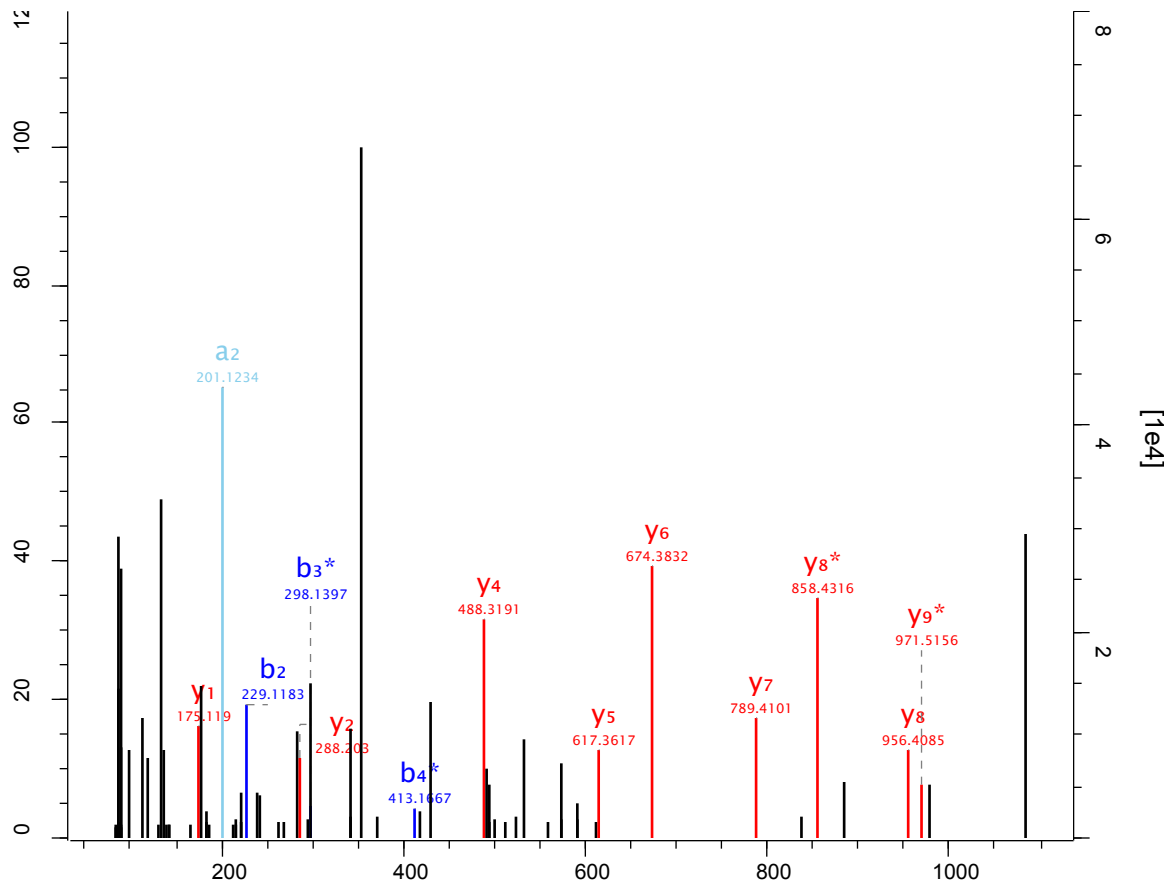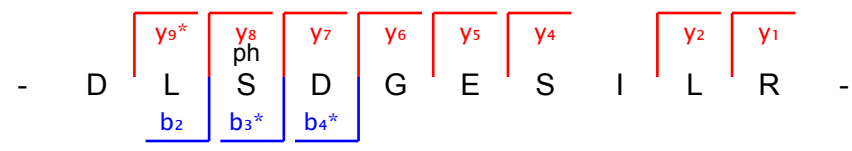

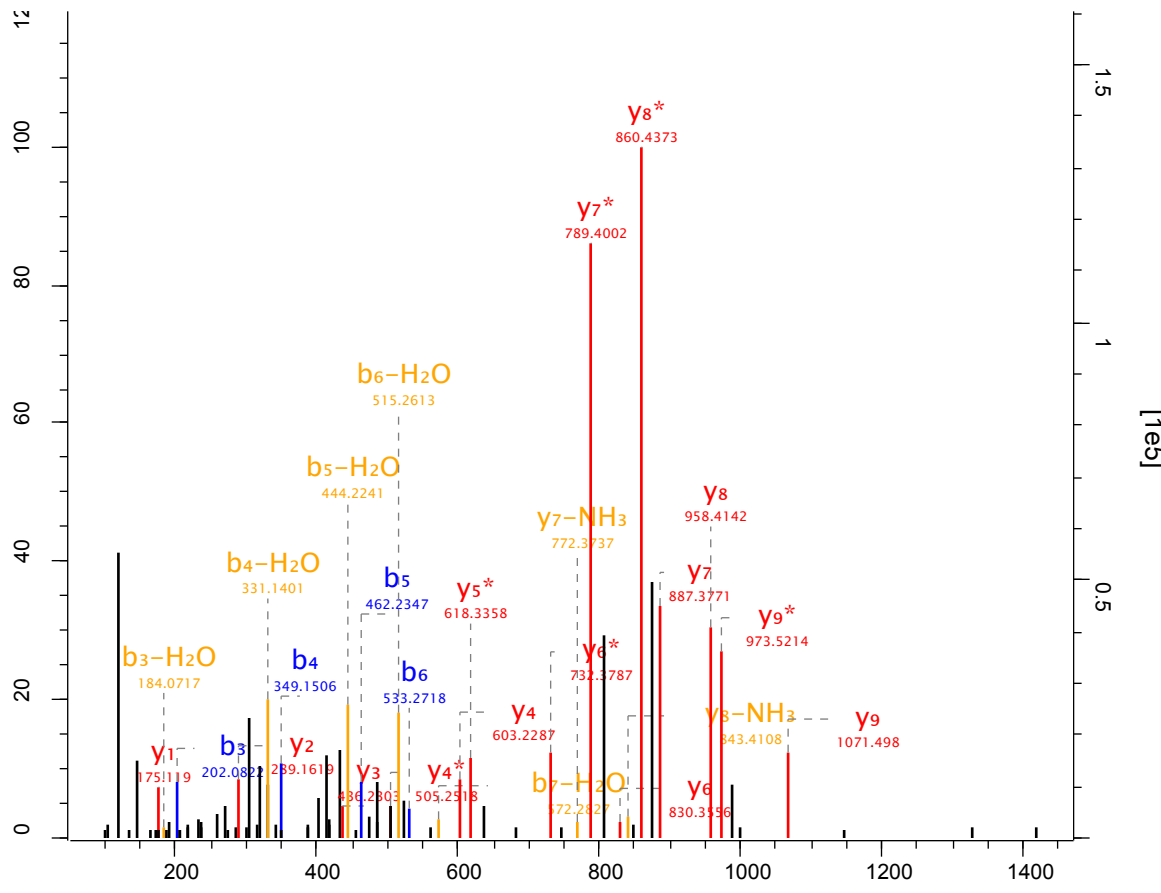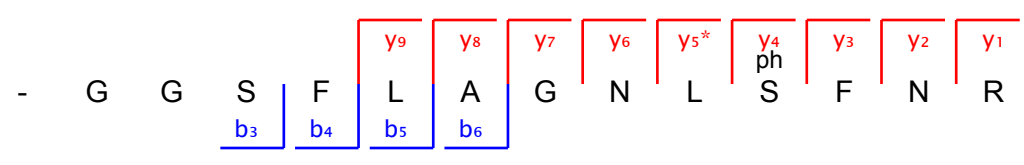

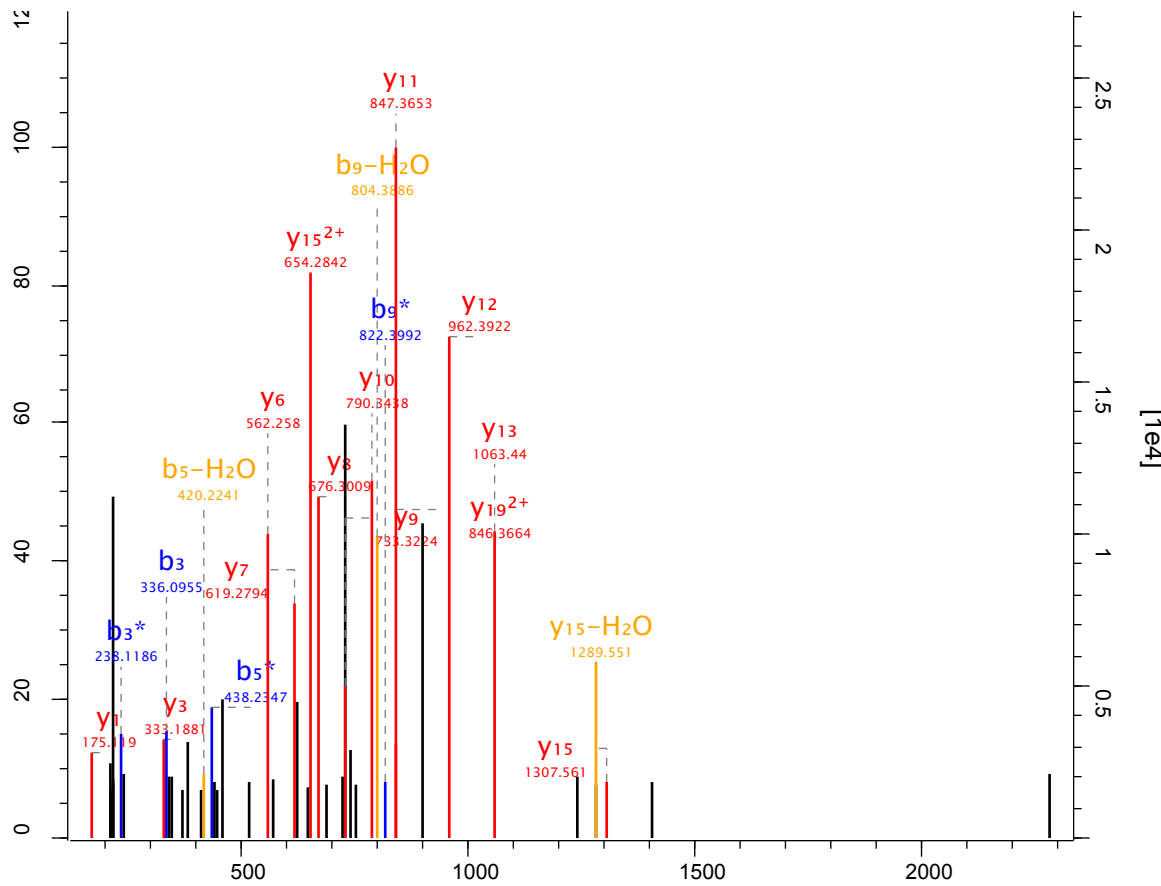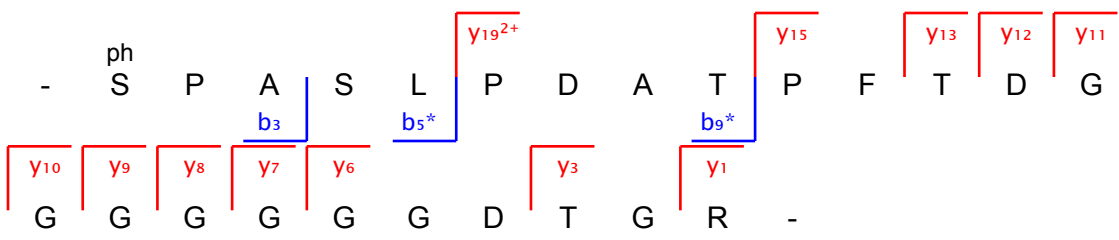

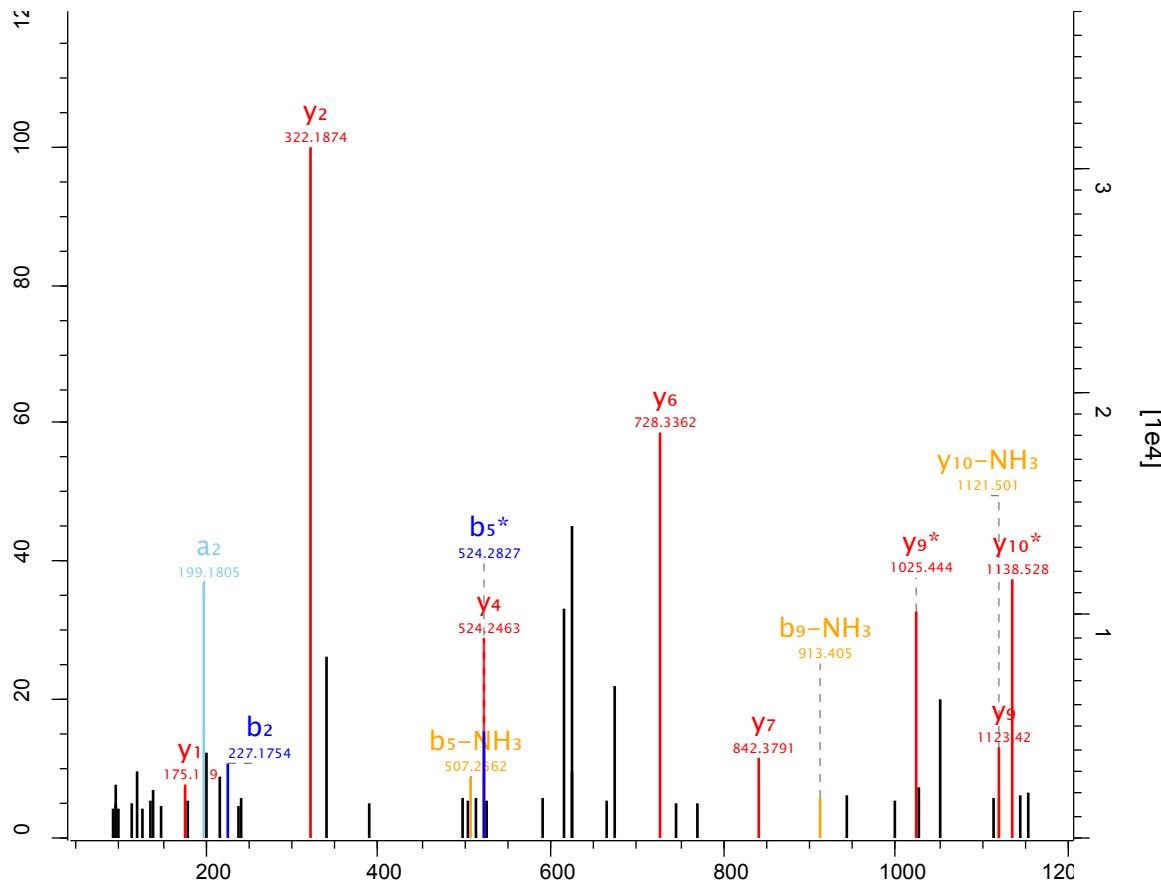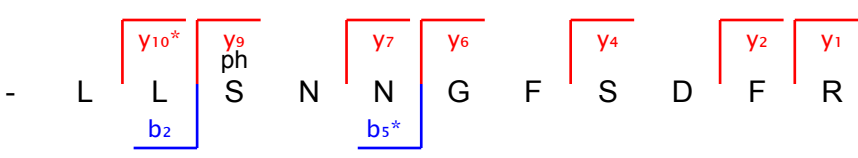

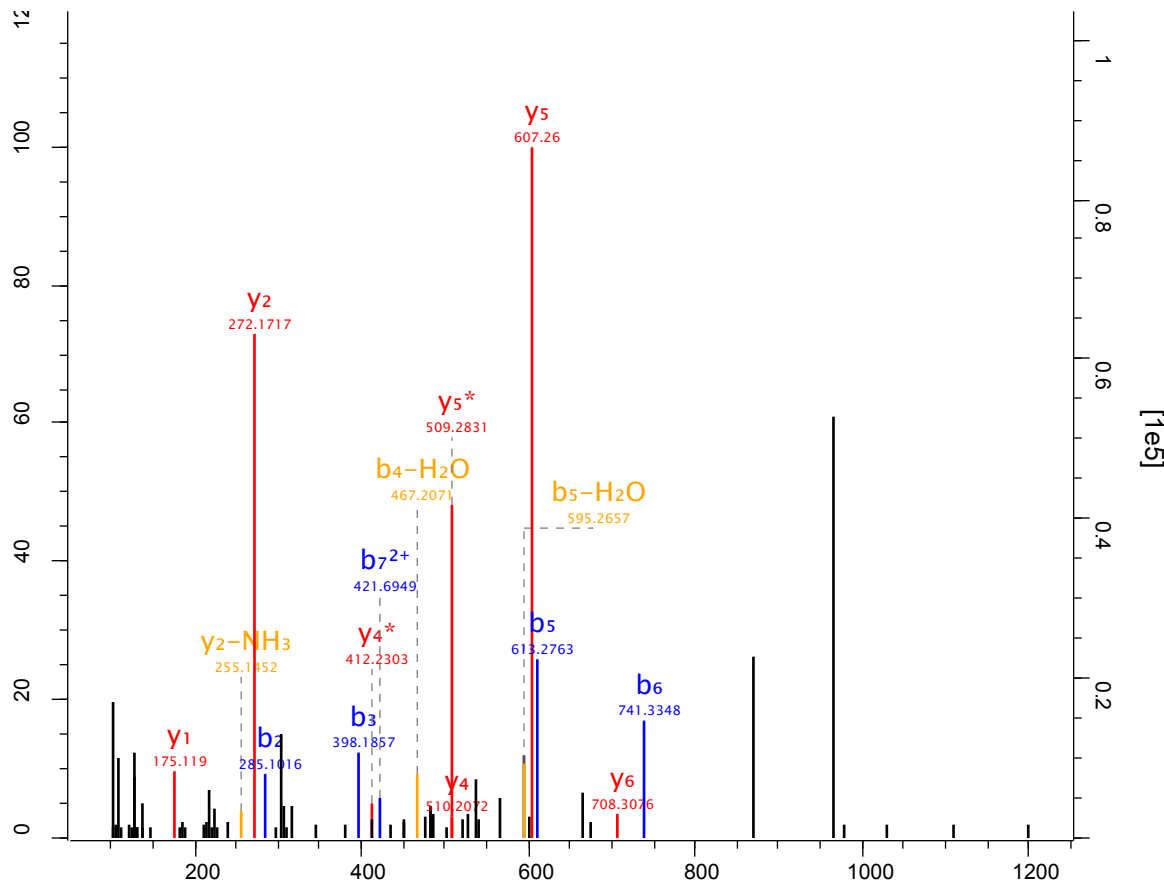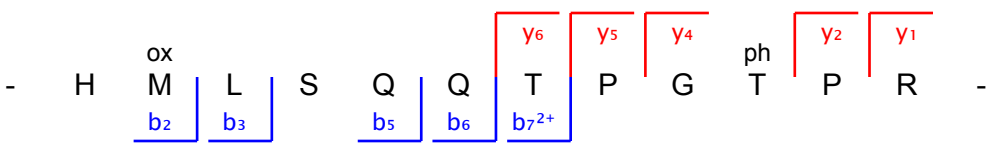

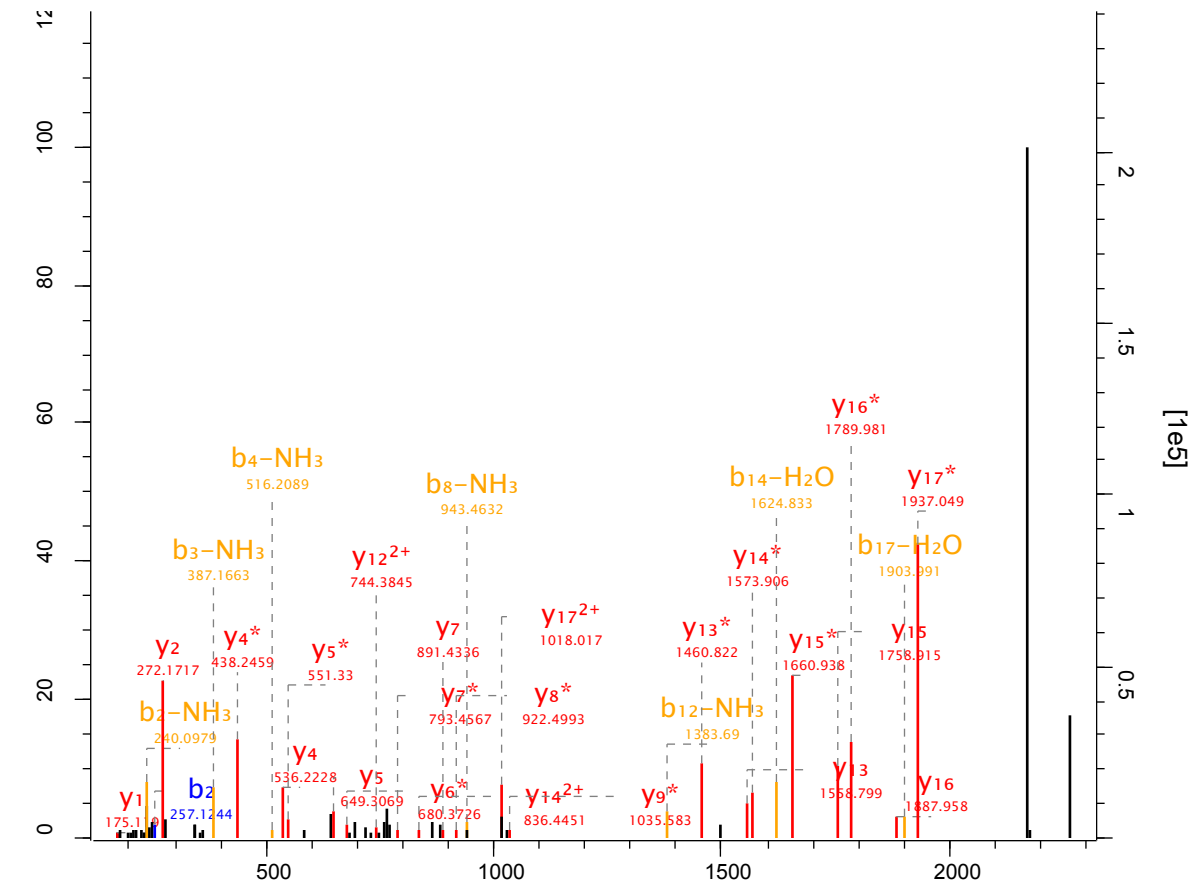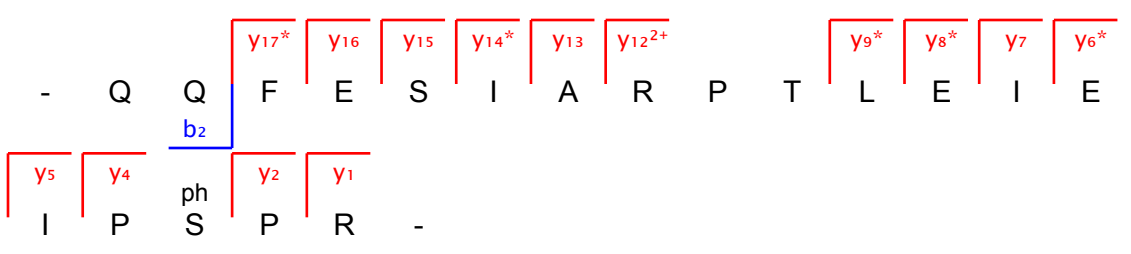

| Raw file                      | Scan | Method    | Score | m/z    |
|-------------------------------|------|-----------|-------|--------|
| 2013_COL15_34_38_151128201608 | 2722 | FTMS; HCD | 63.69 | 520.56 |

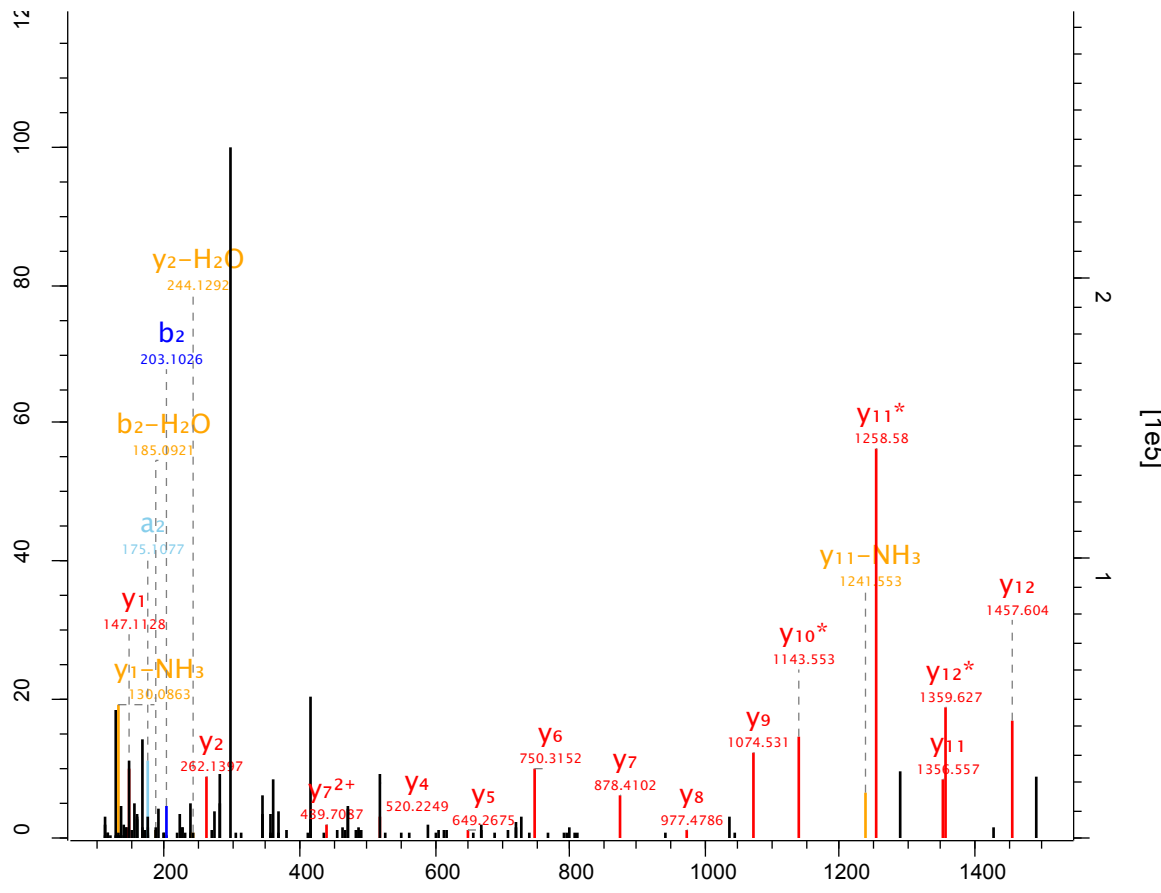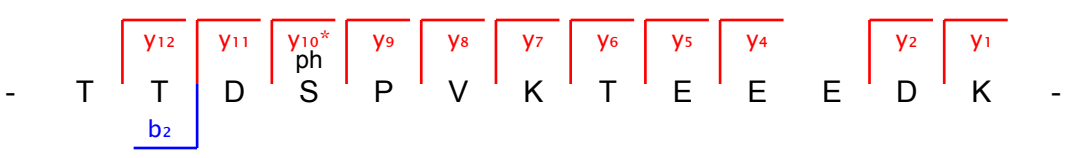



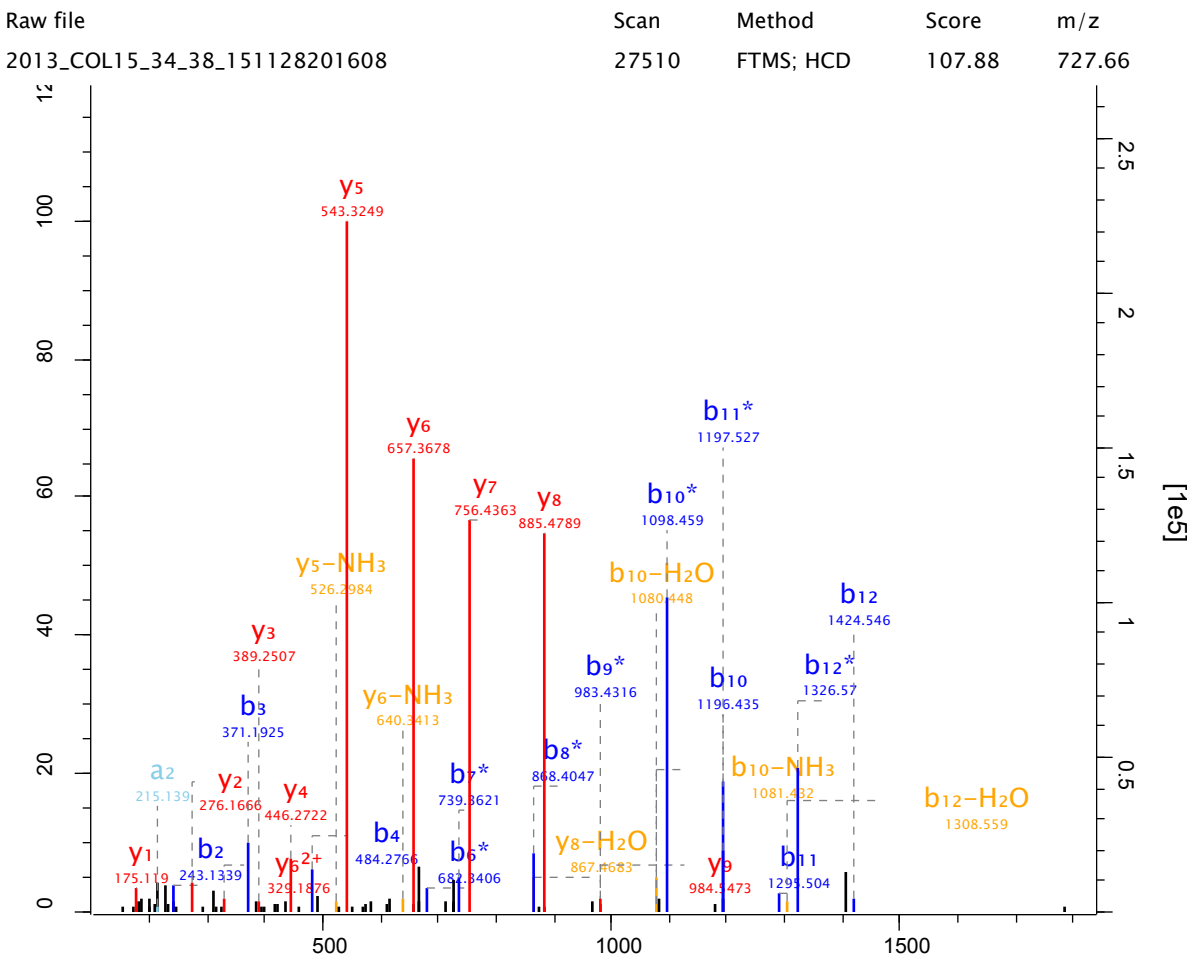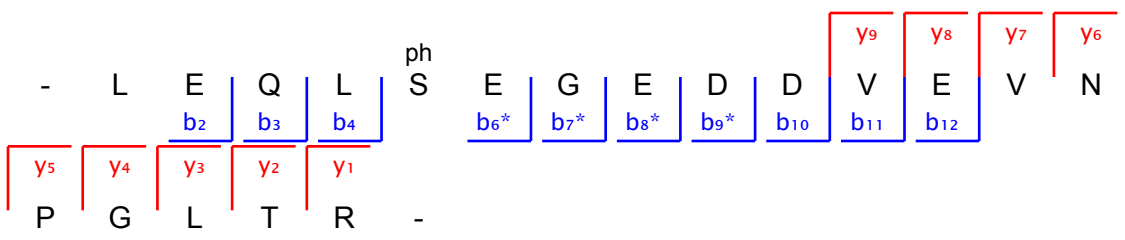

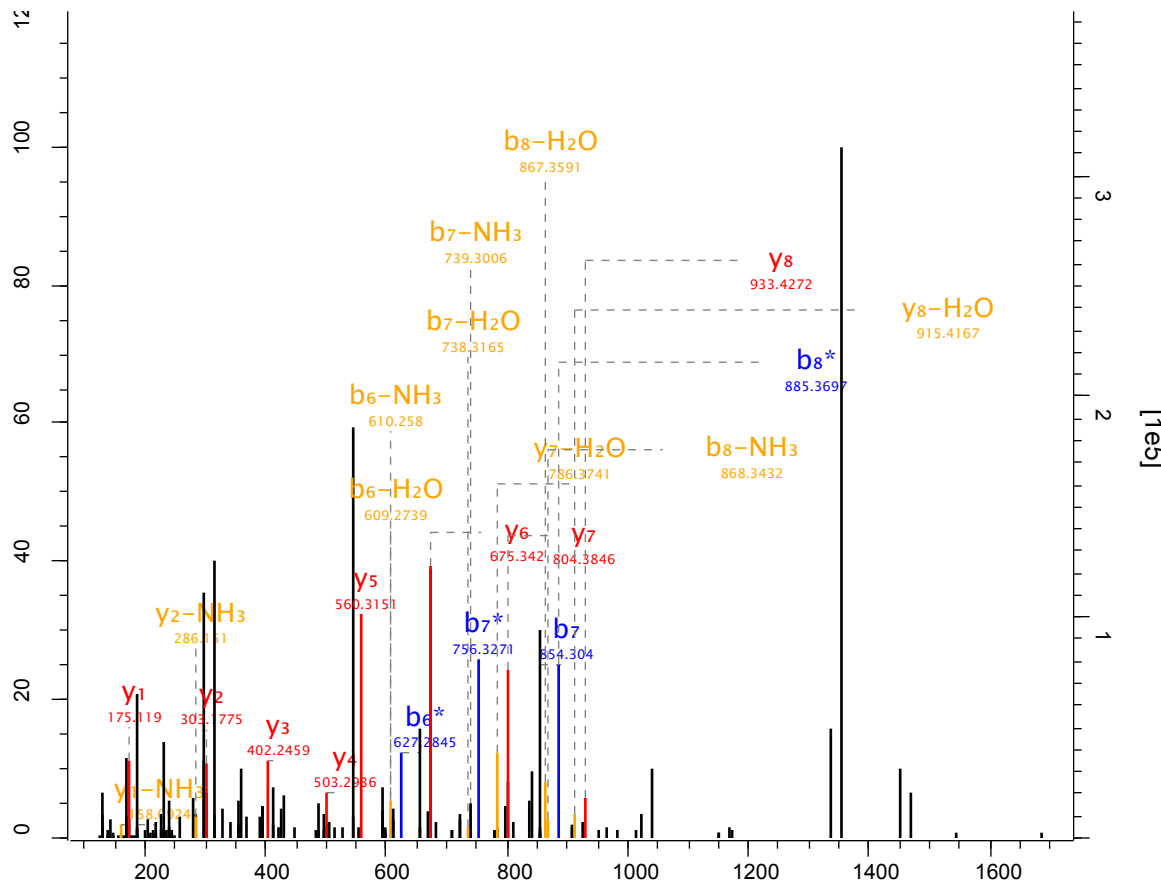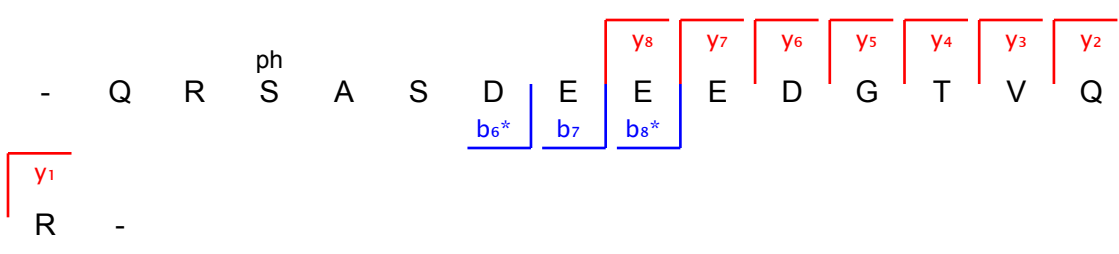

Raw file 2013\_COL15\_34\_38\_151128201608 Scan 2779 Method FTMS; HCD Score 59.16 m/z 561.49

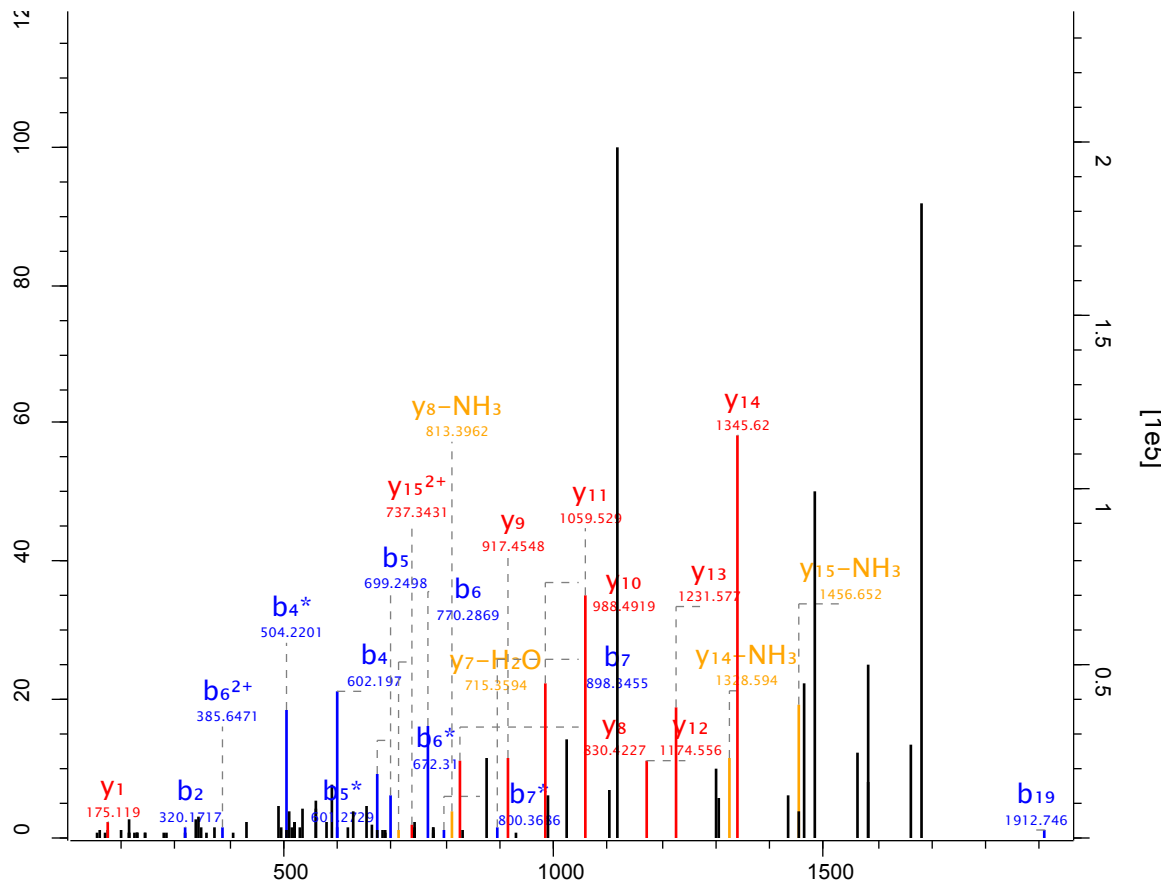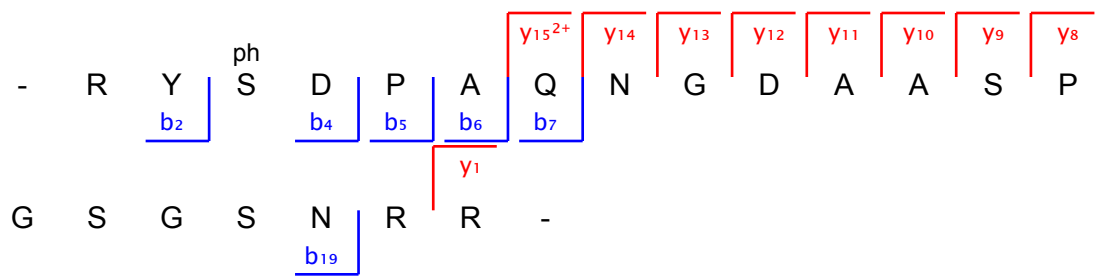

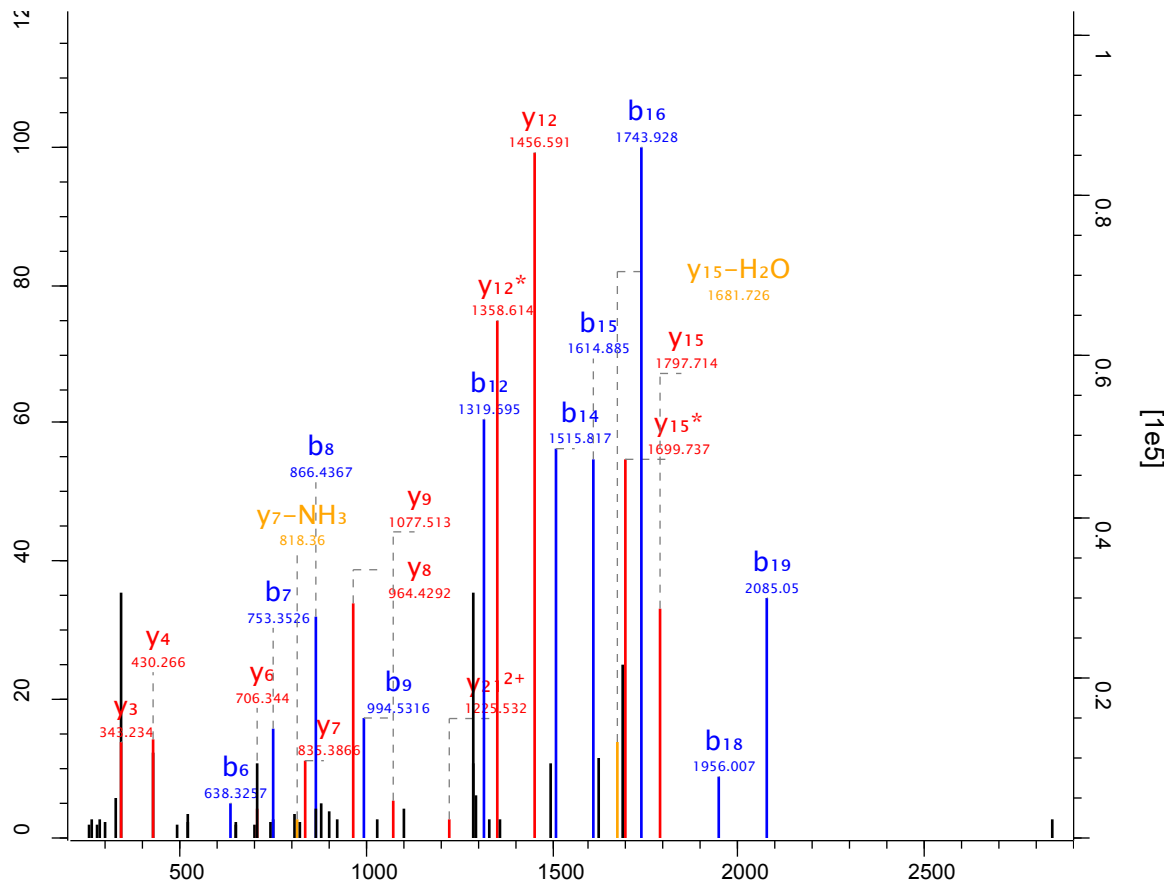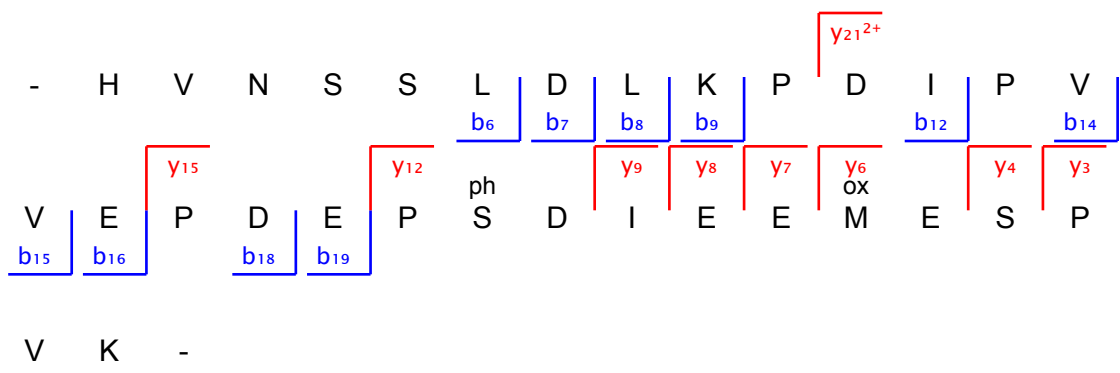

V K -

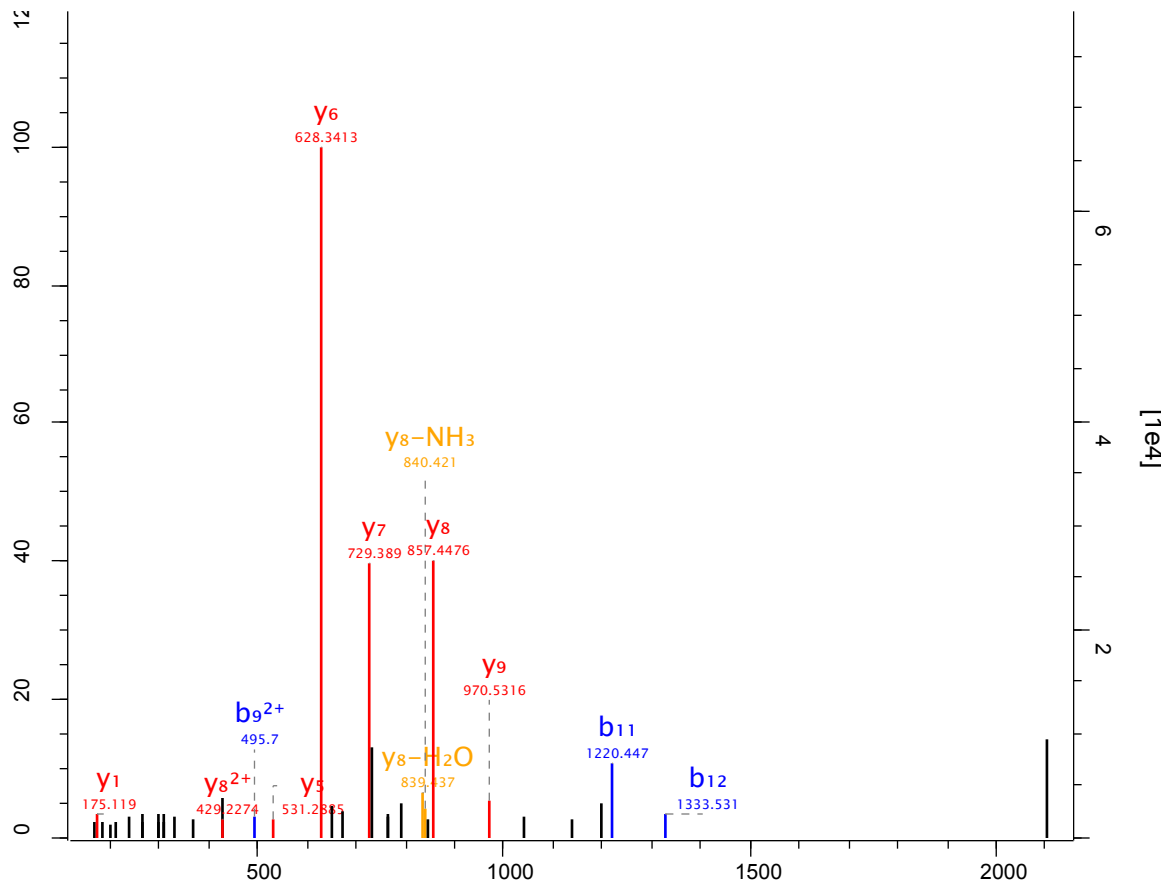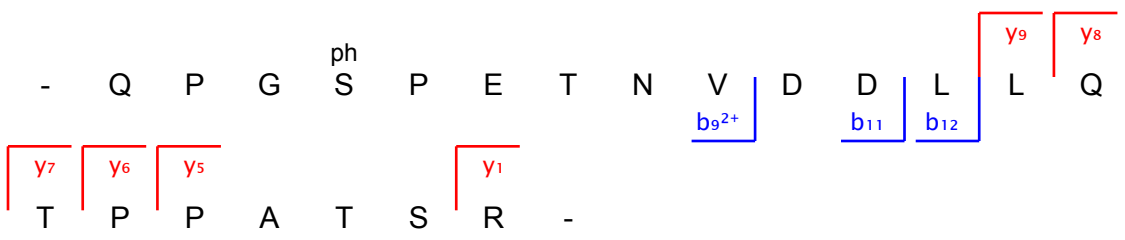





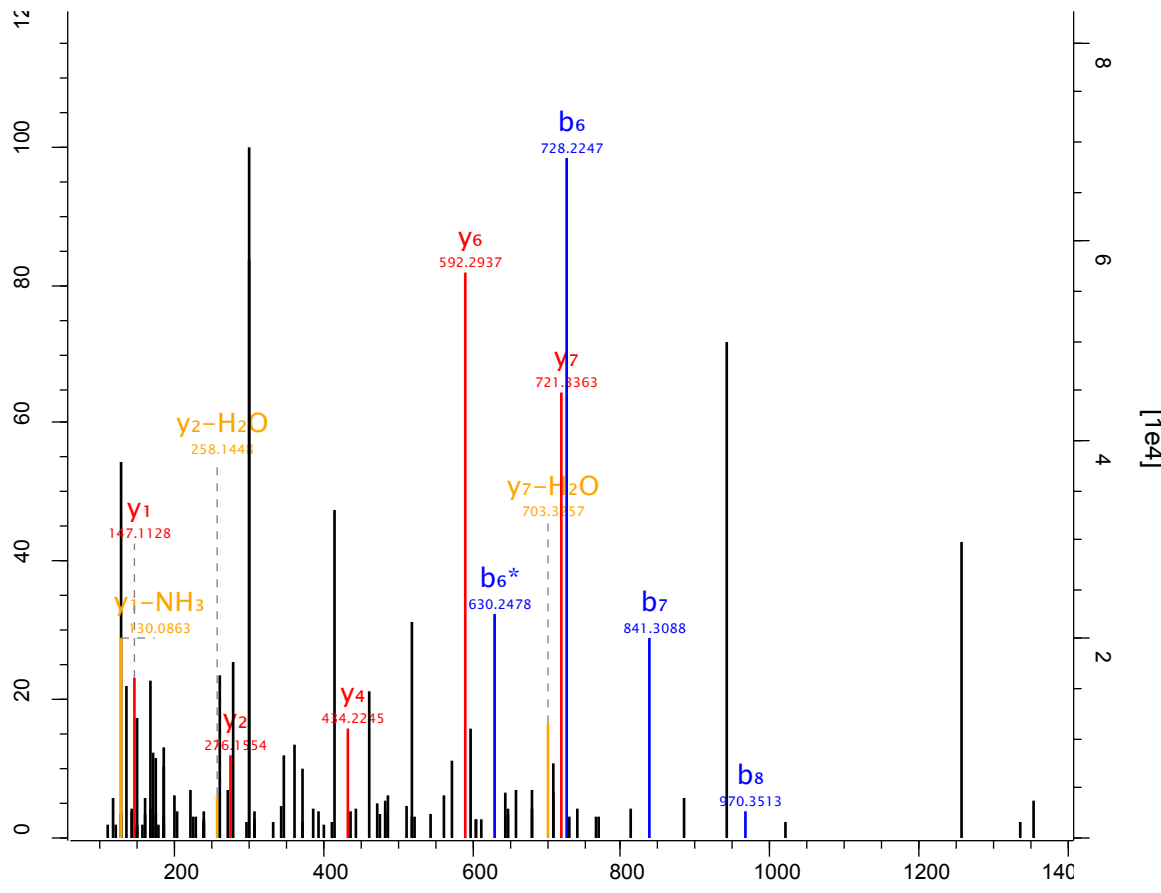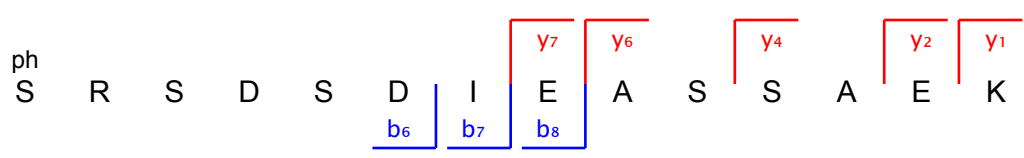



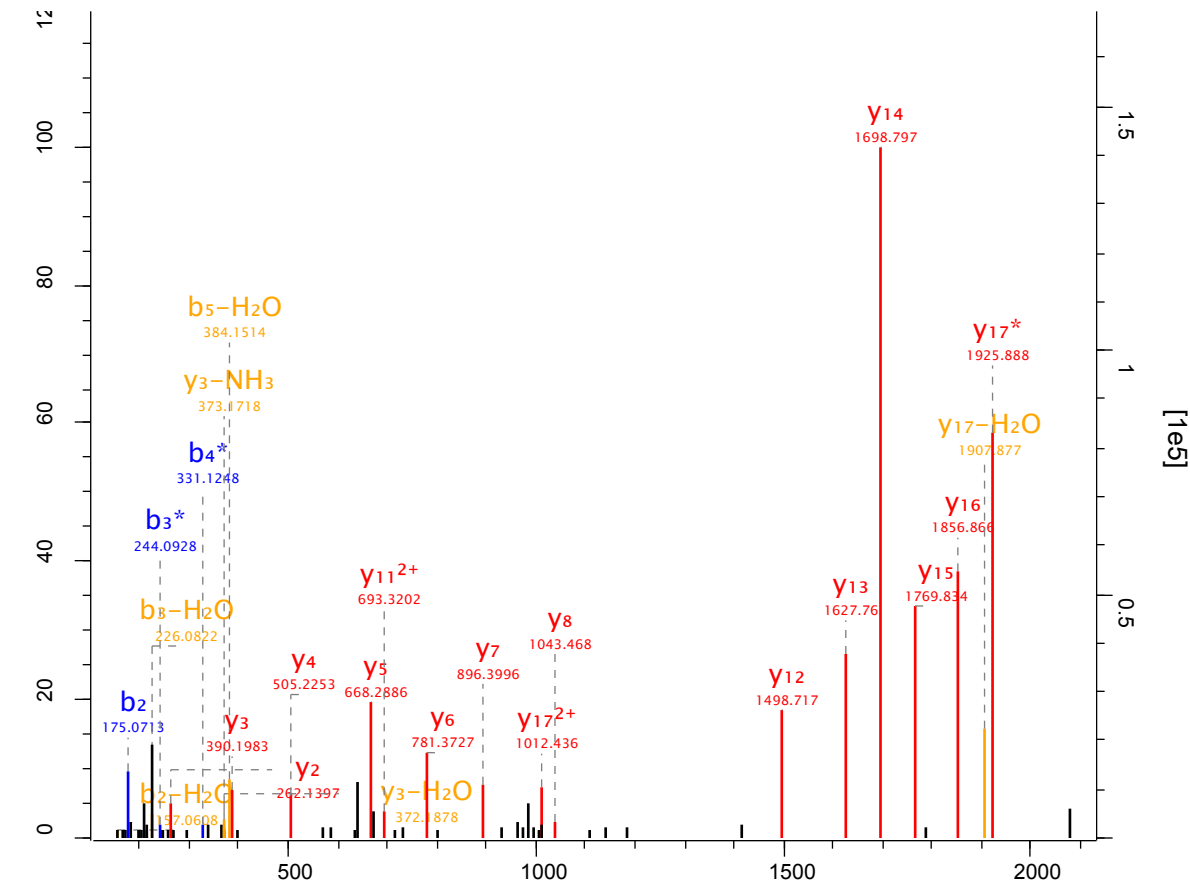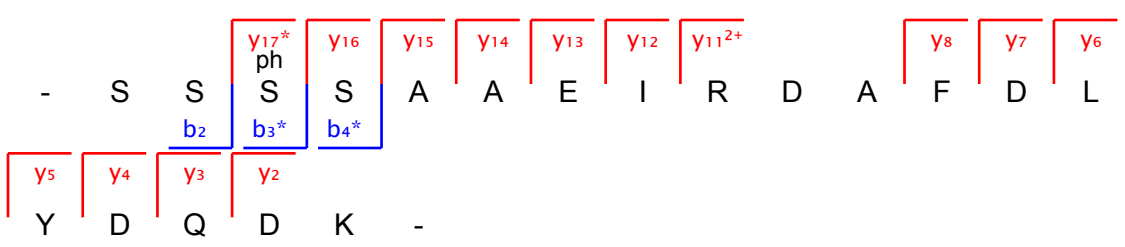

| Raw file                      | Scan | Method    | Score | m/z    |
|-------------------------------|------|-----------|-------|--------|
| 2013_COL15_34_38_151128201608 | 2866 | FTMS; HCD | 58.72 | 614.27 |

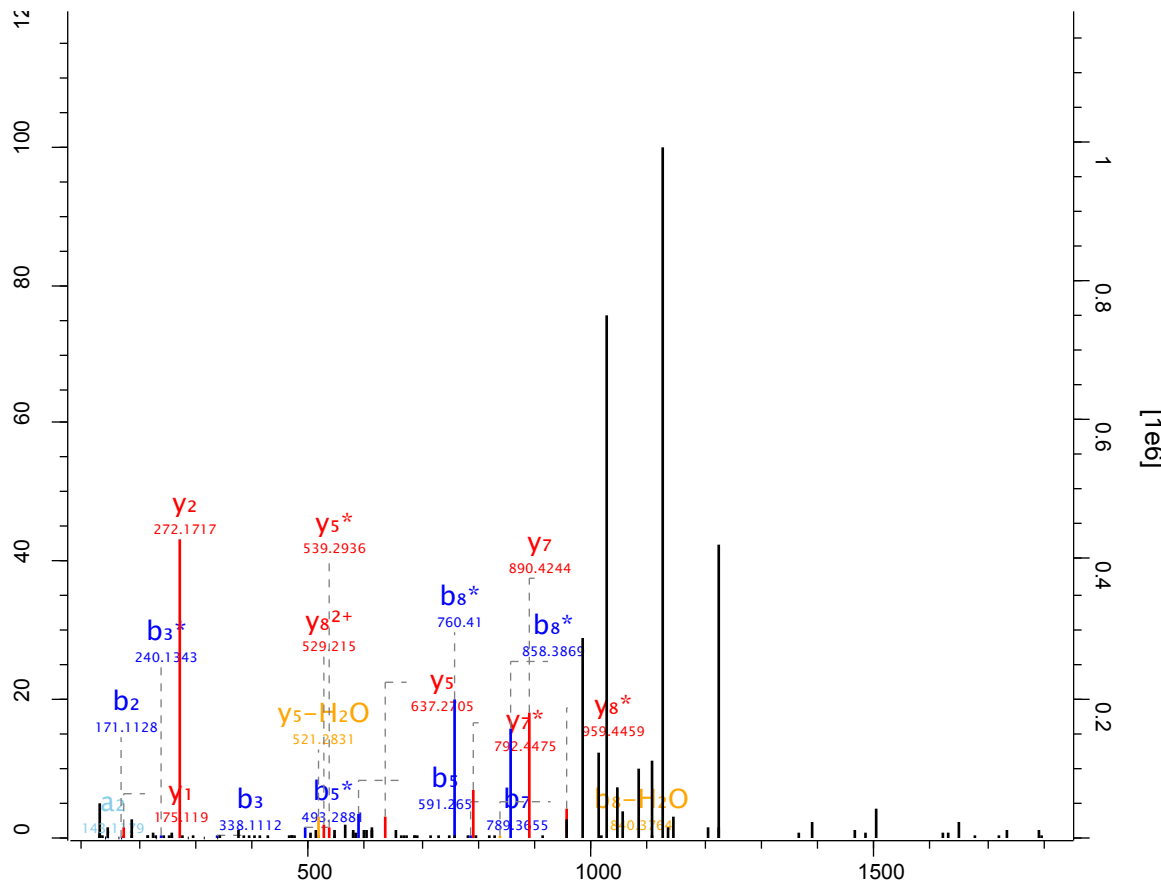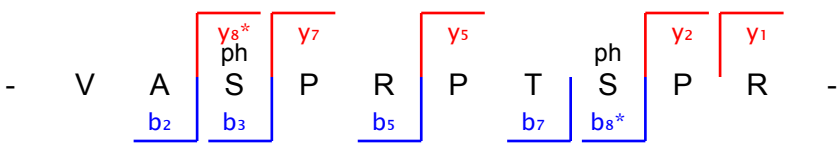

2013\_COL15\_34\_38\_151128201608

28666

FTMS; HCD

70.34

753.97

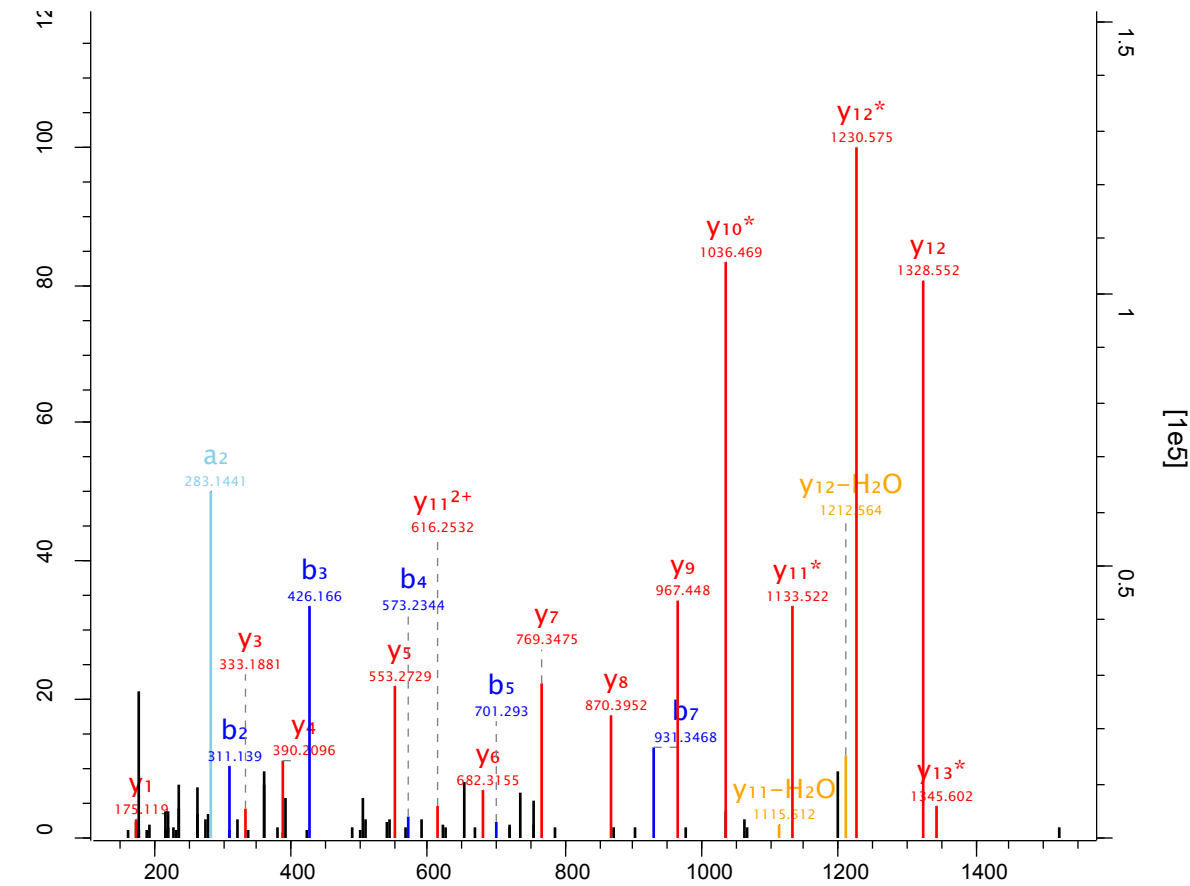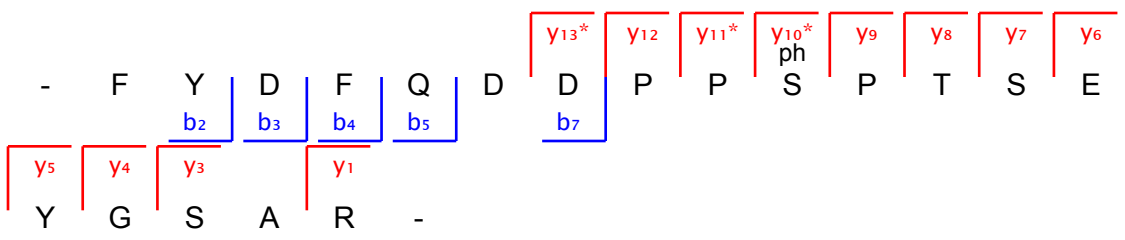

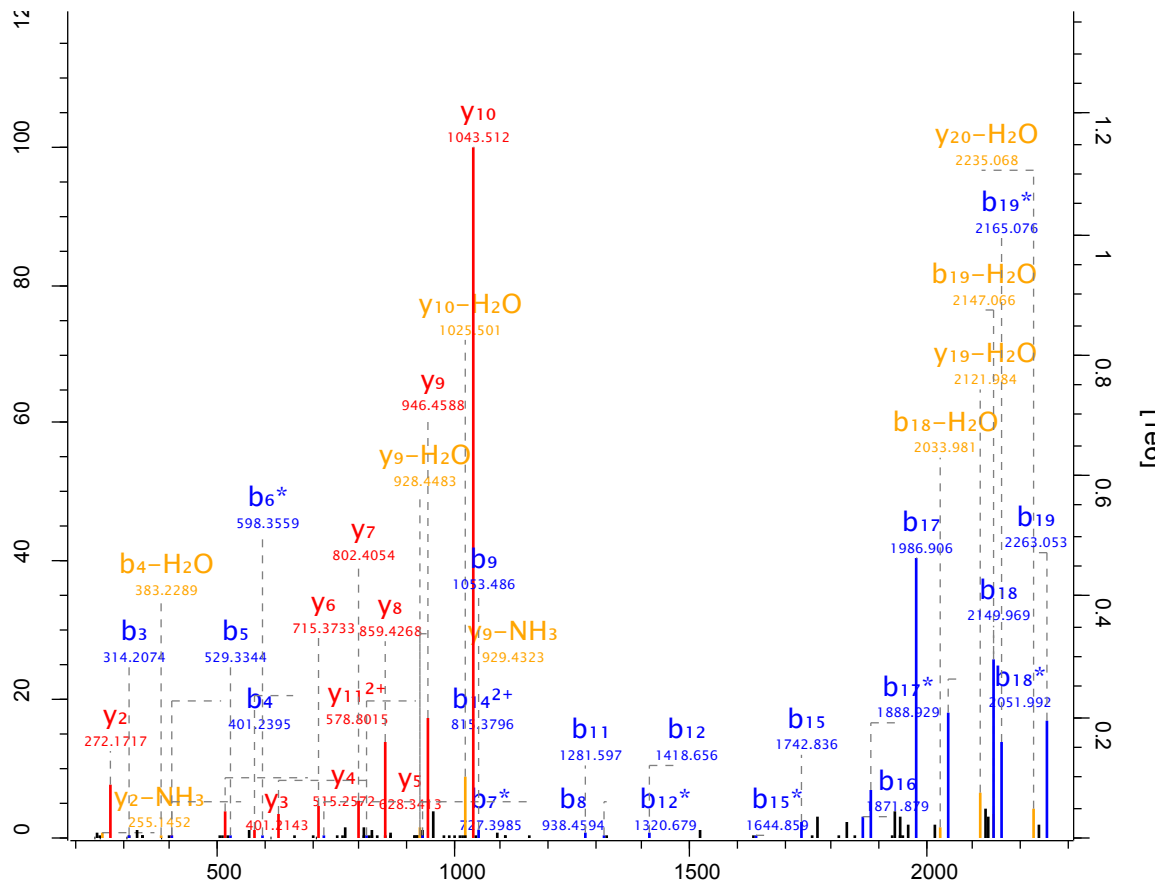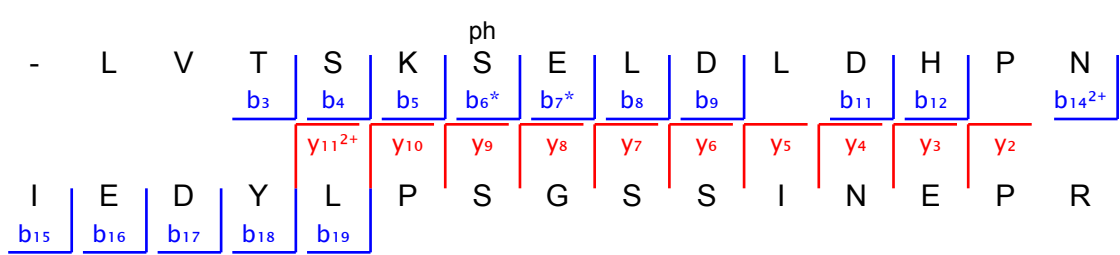

2013\_COL15\_34\_38\_151128201608

28961

FTMS; HCD

218.28

656.79

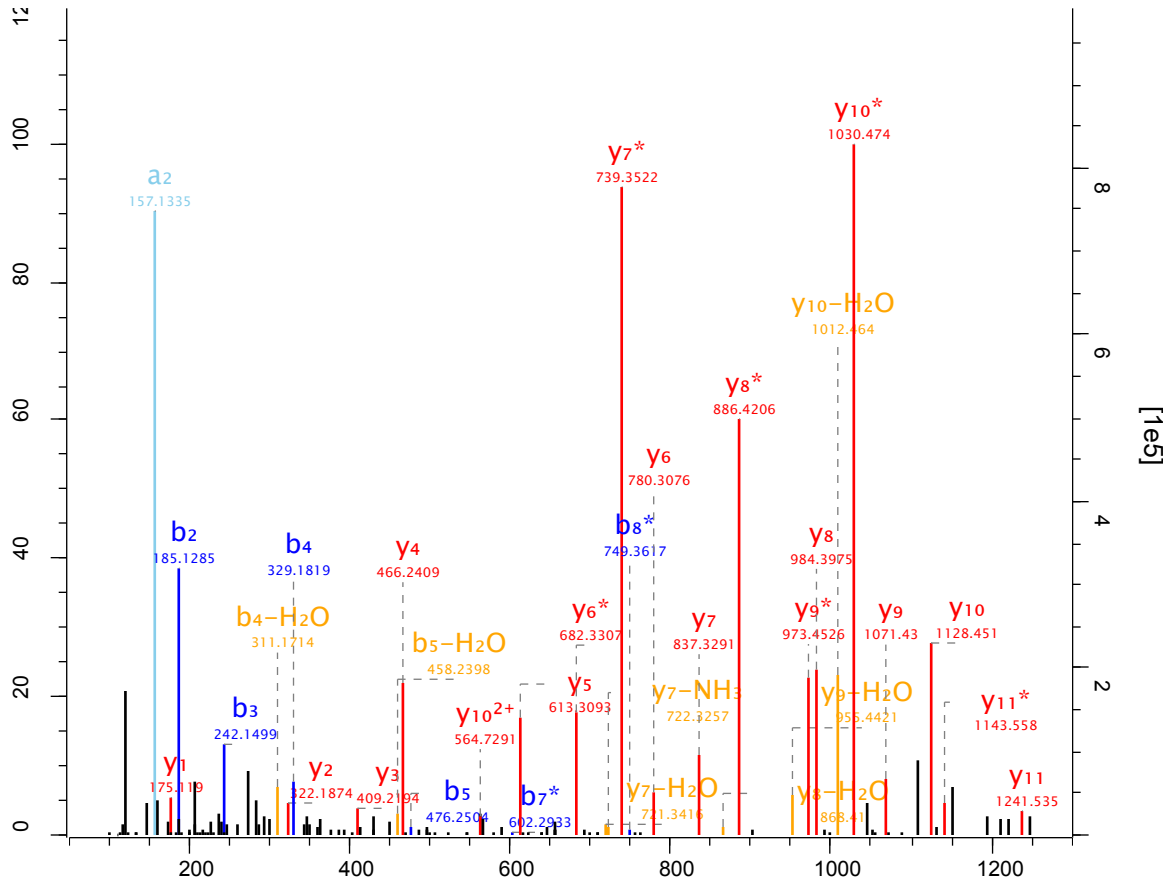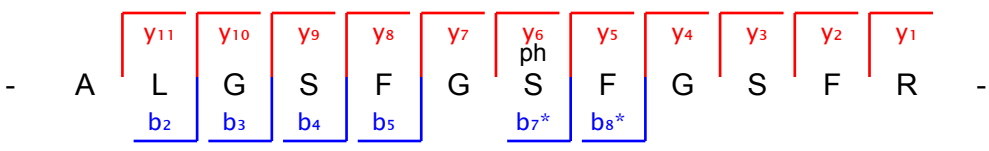

2013\_COL15\_34\_38\_151128201608

29144

FTMS; HCD

118.08

645.29

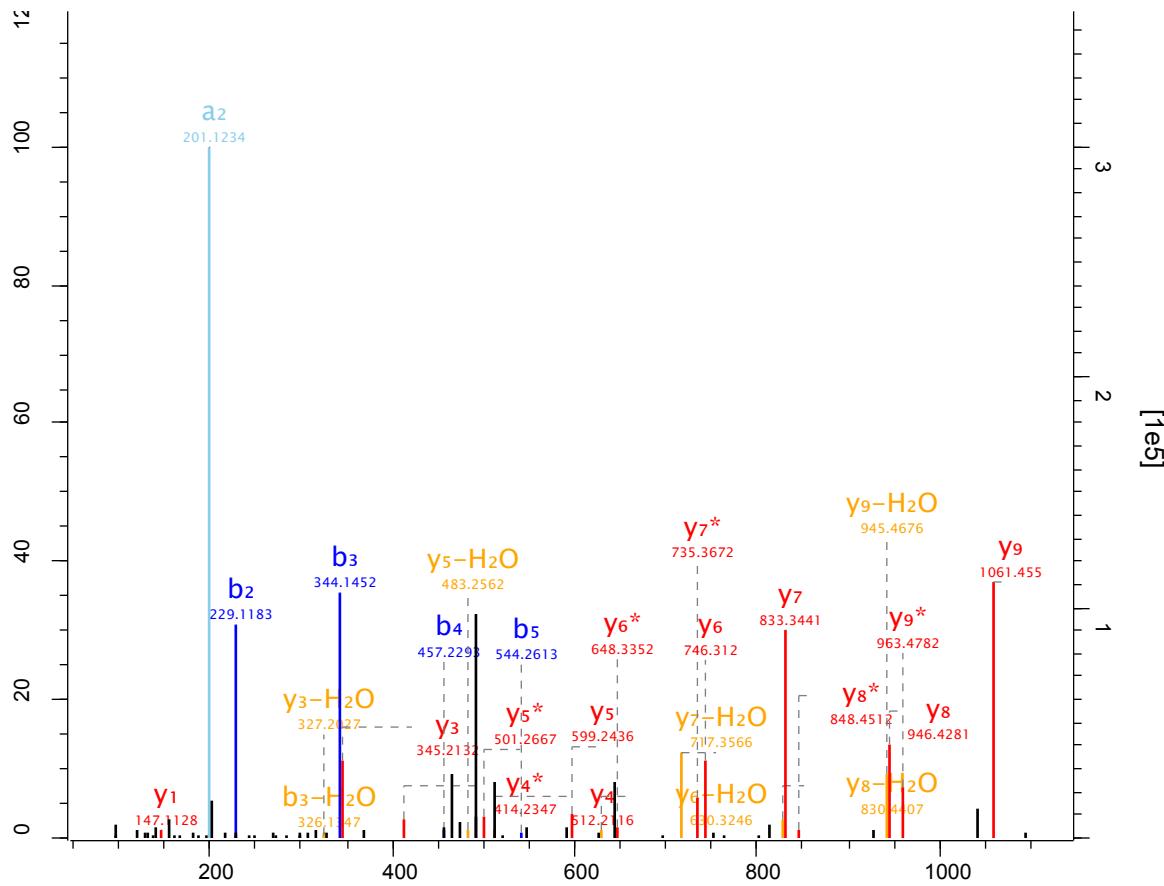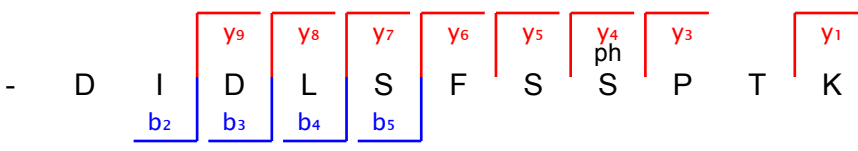

Raw file 2013\_COL15\_34\_38\_151128201608 Scan 29159 Method FTMS; HCD Score 48.08 m/z 809.37

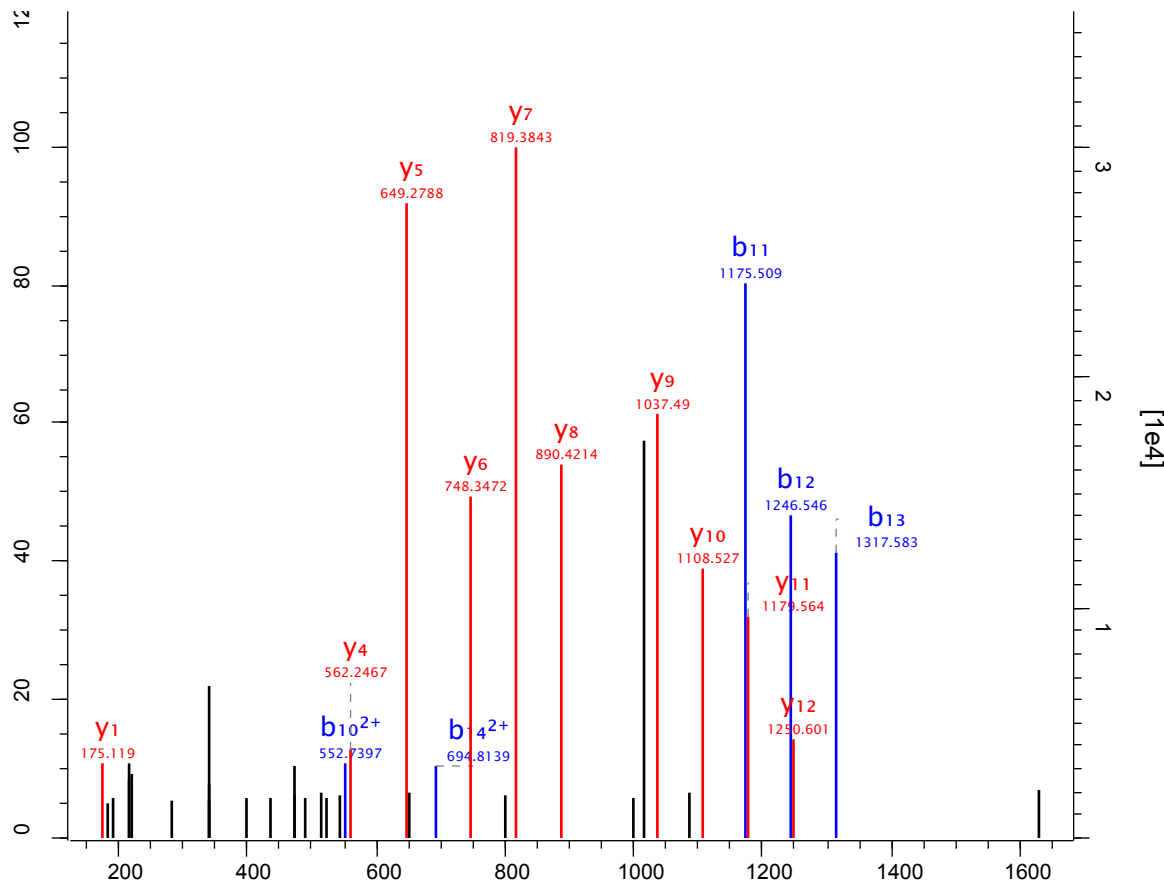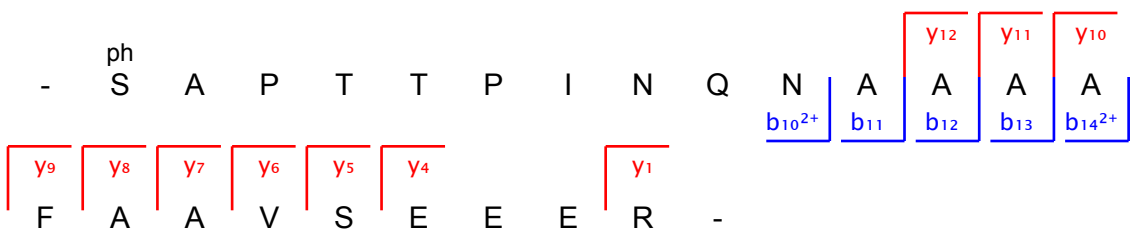

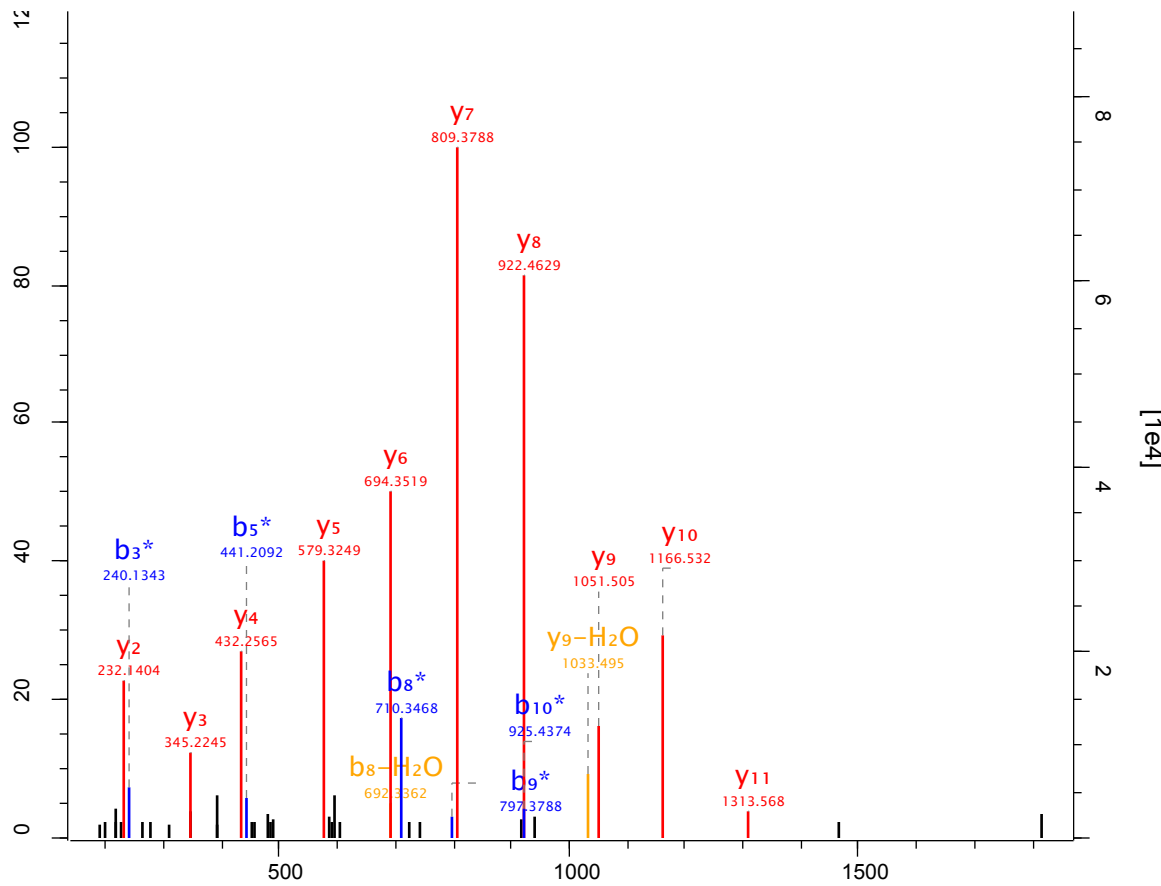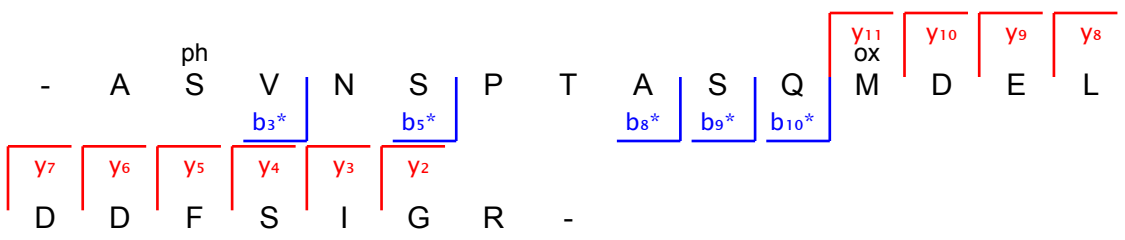



2013\_COL15\_34\_38\_151128201608

29833

FTMS; HCD

184.78

936.38

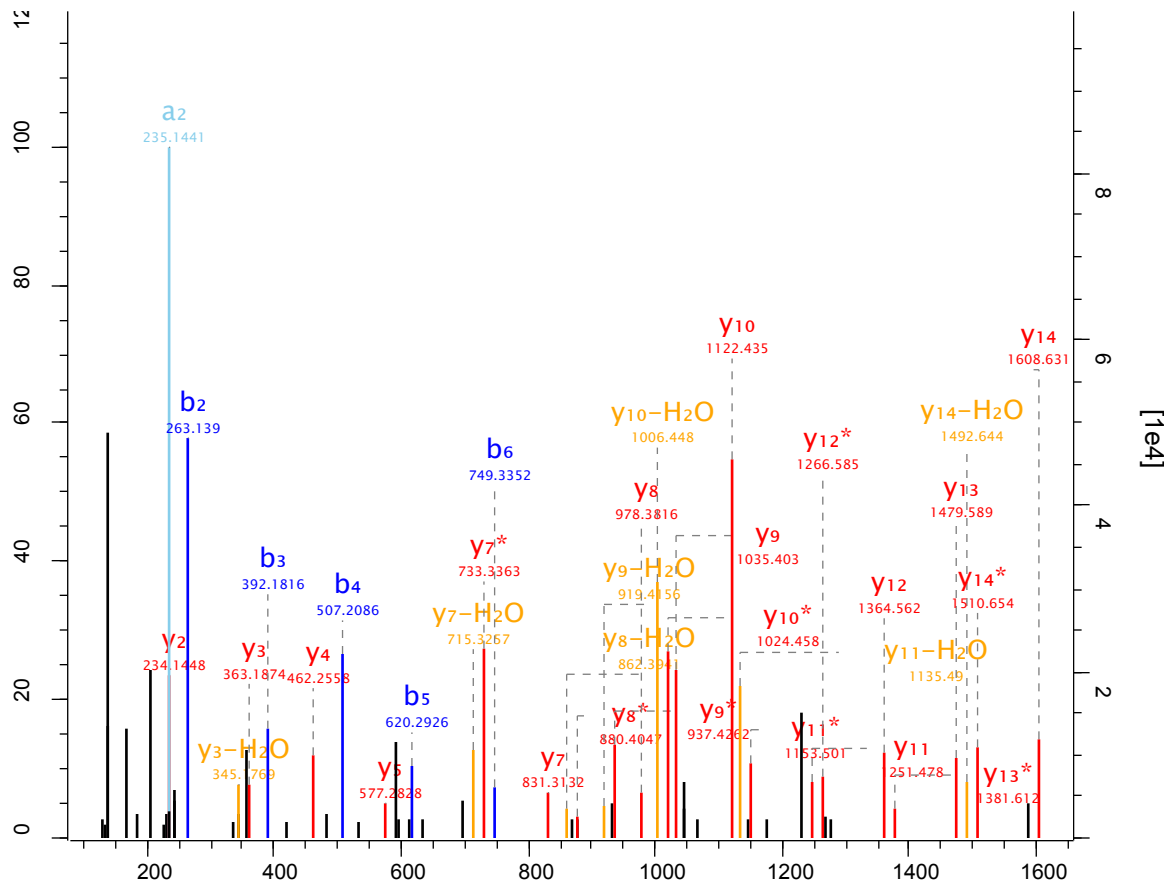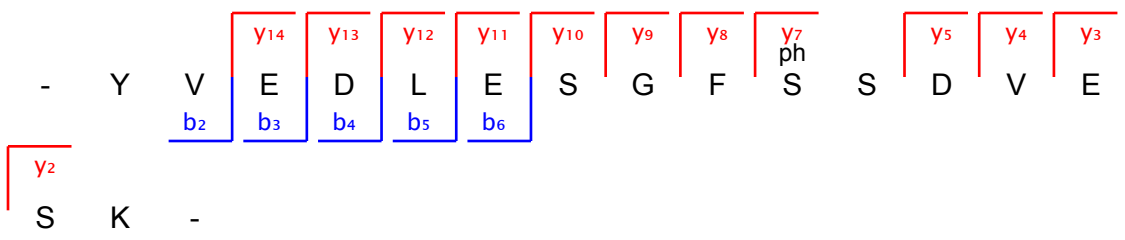

Raw file 2013\_COL15\_34\_38\_151128201608 Scan 2987 Method FTMS; HCD Score 206.21 m/z 618.27

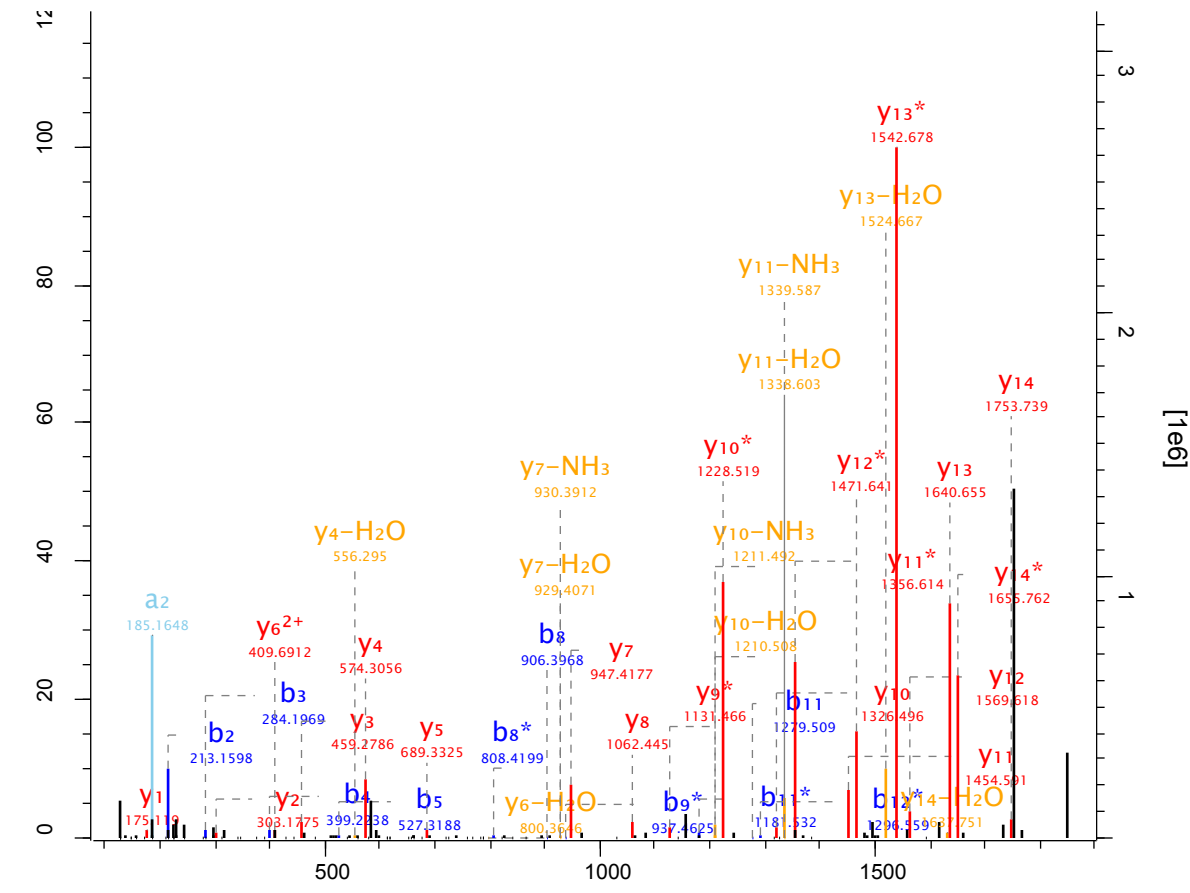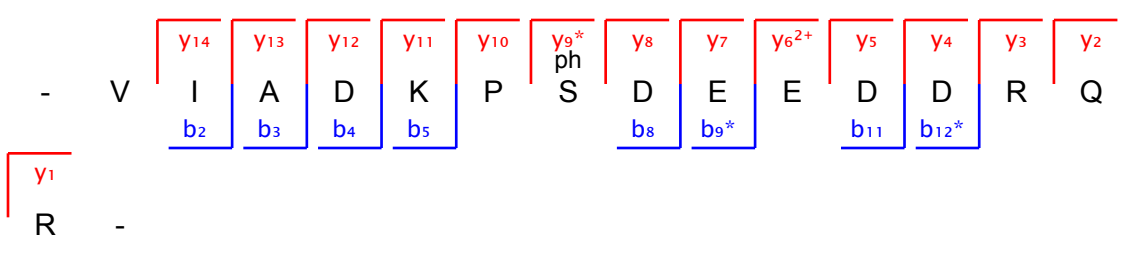

Raw file Scan Method Score m/z  
 2013\_COL15\_34\_38\_151128201608 29904 FTMS; HCD 49.19 715.3

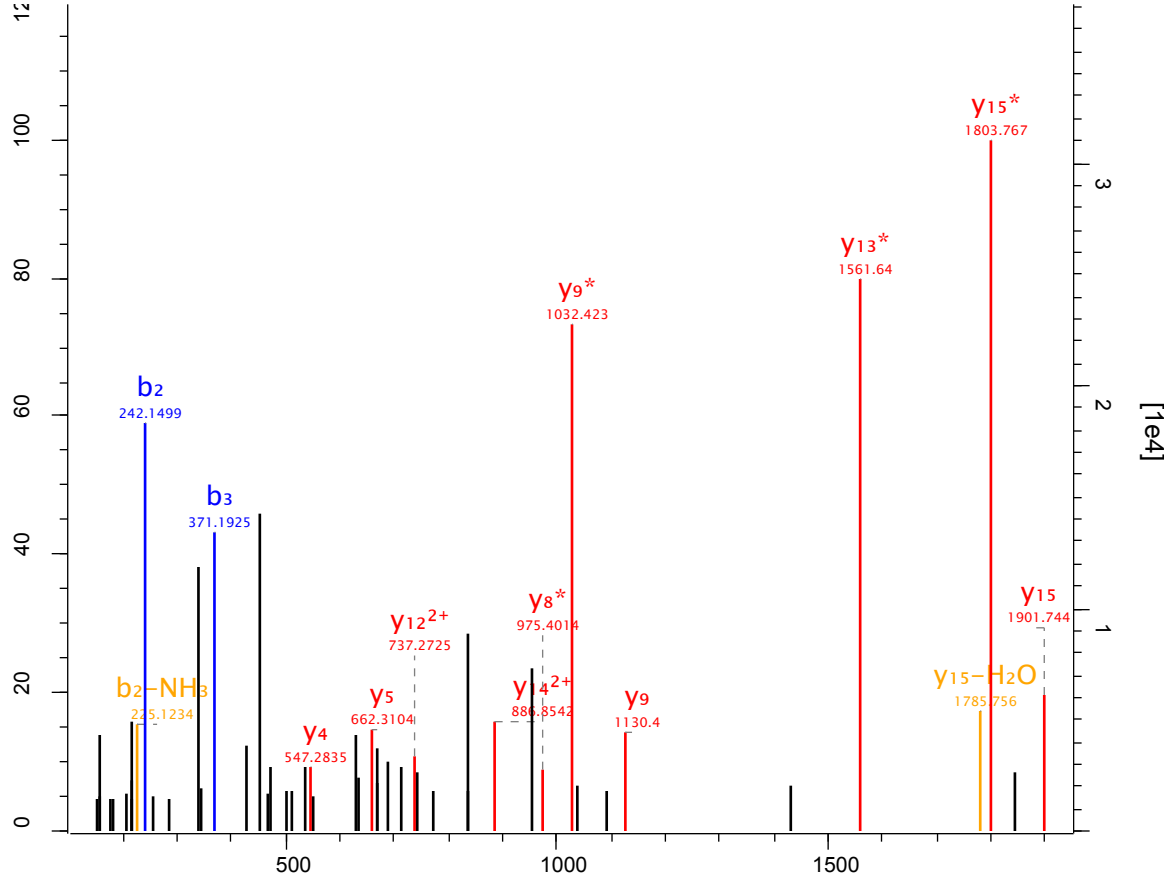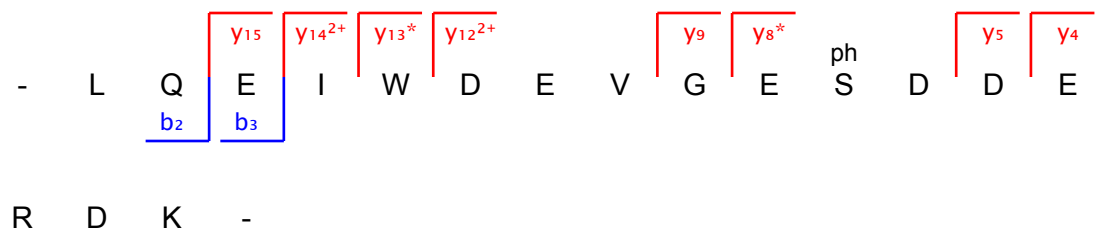

R D K -

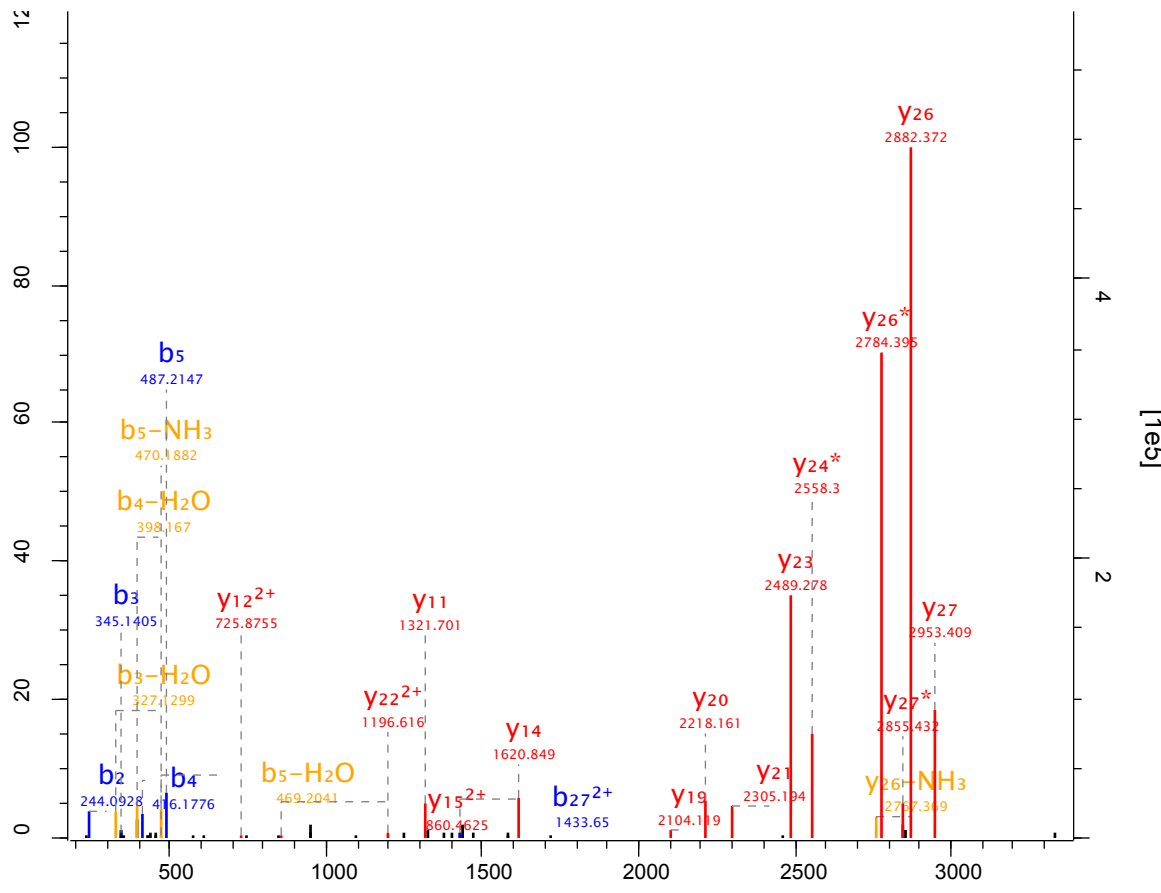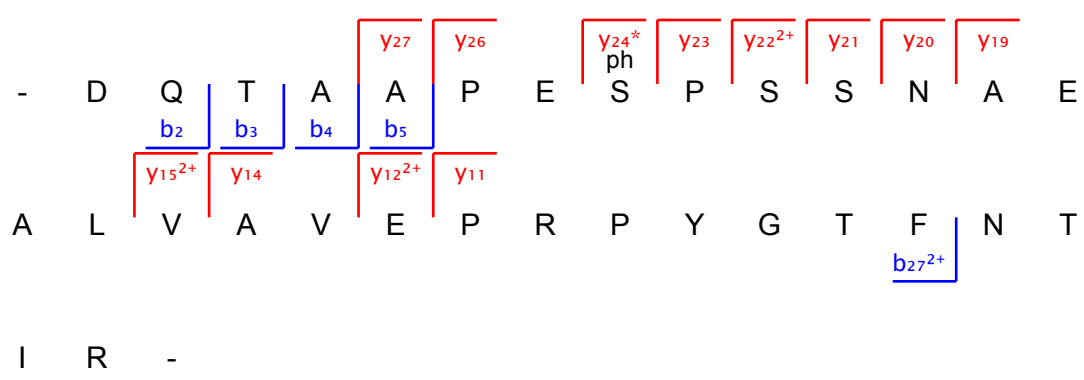

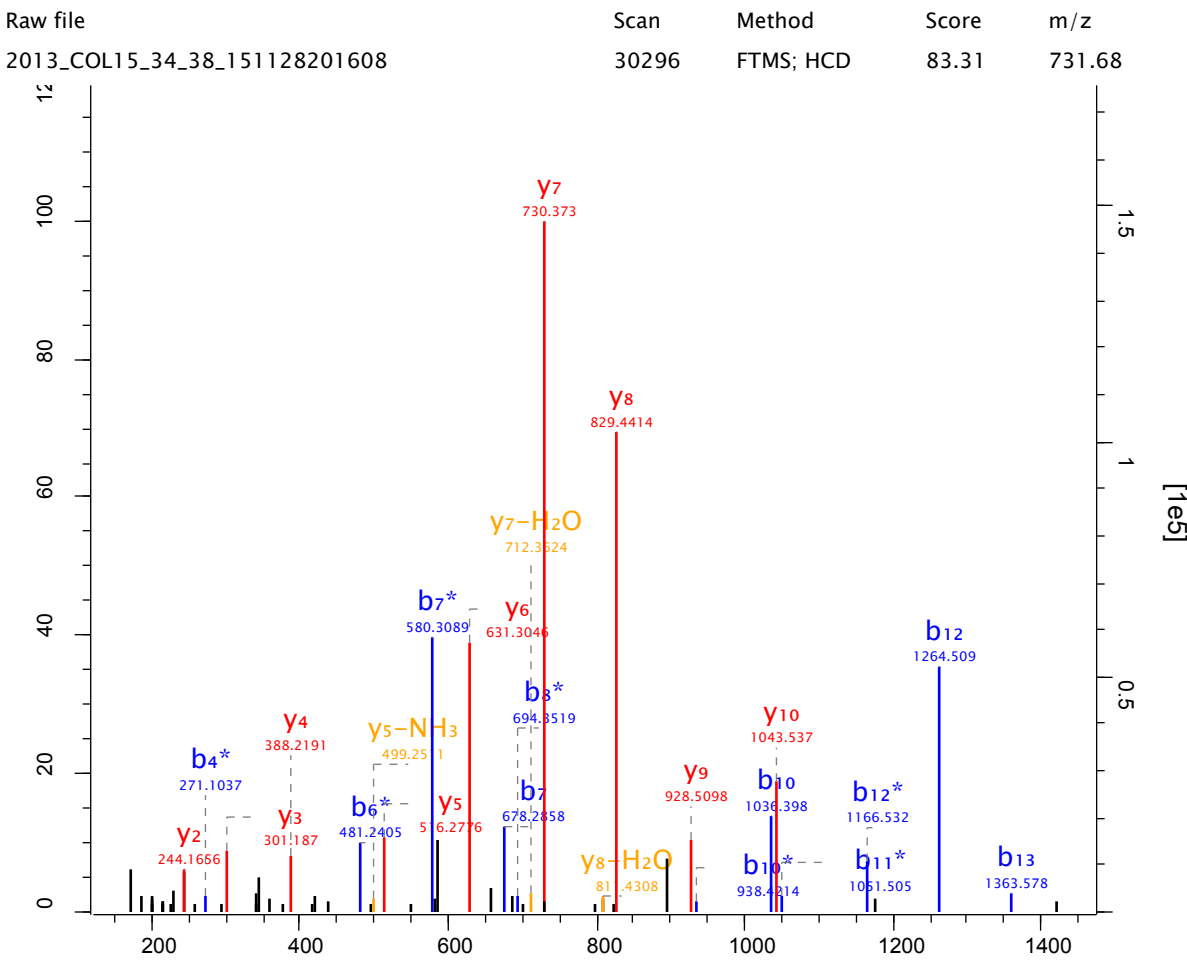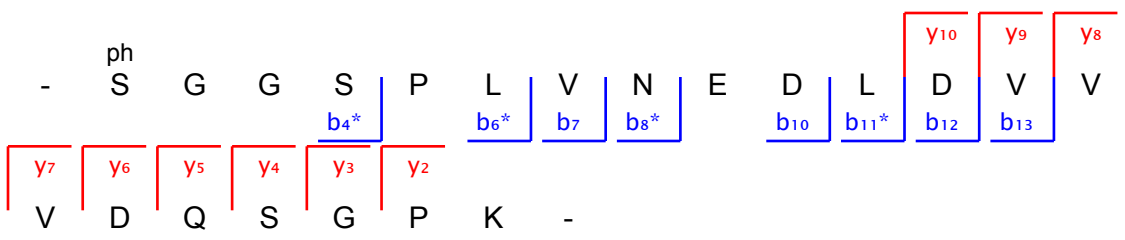

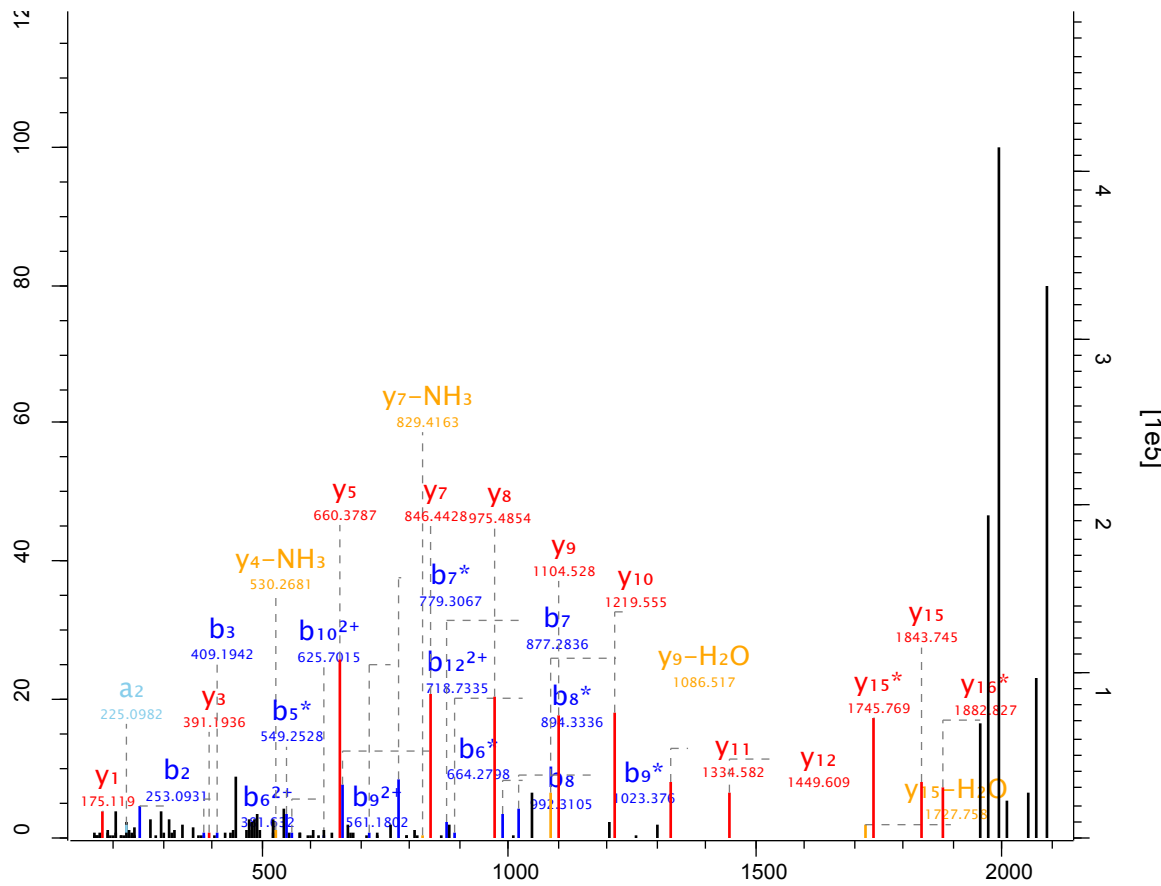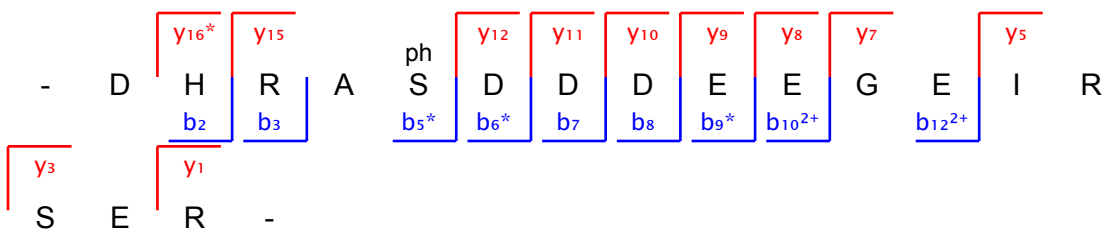

Raw file 2013\_COL15\_34\_38\_151128201608 Scan 3093 Method FTMS; HCD Score 43.76 m/z 528.25

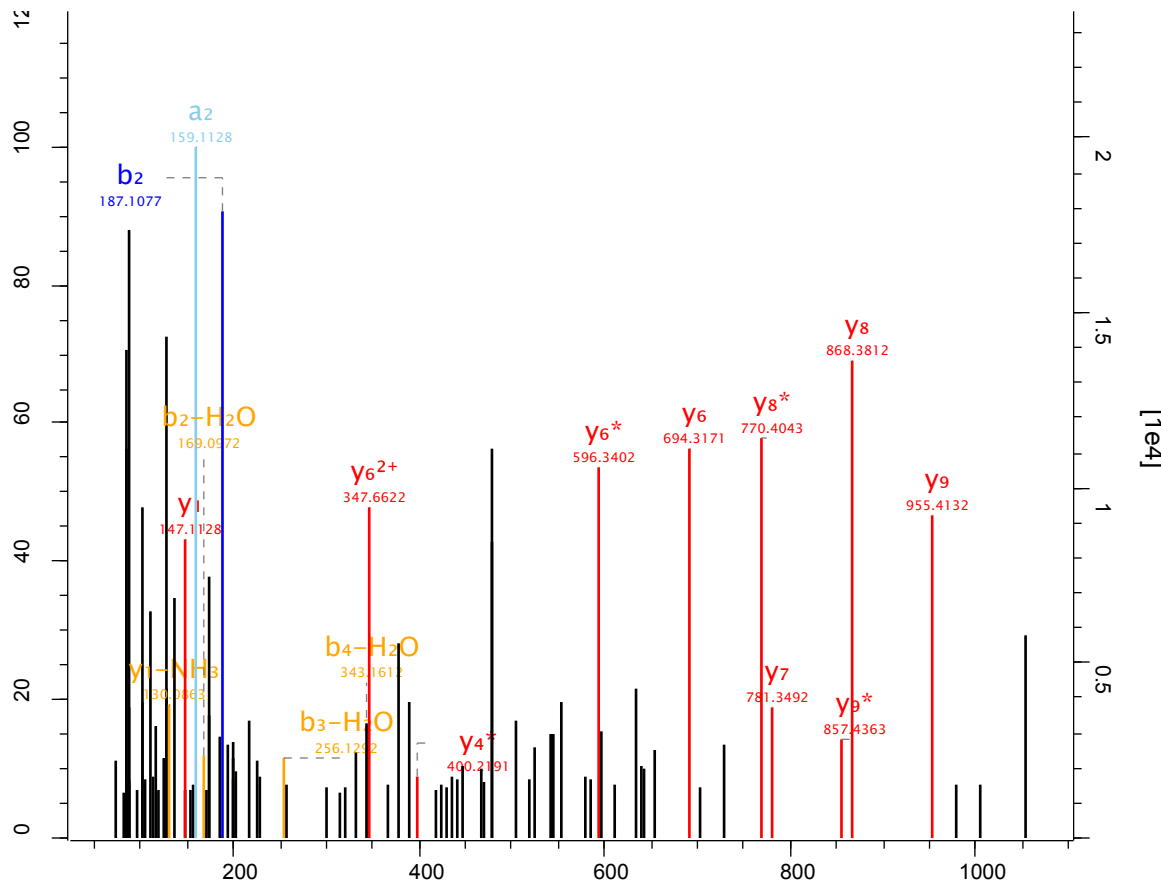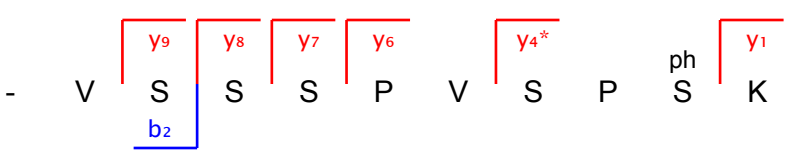

Raw file  
2013\_COL15\_34\_38\_151128201608

Scan 30958 Method FTMS; HCD Score 44.51 m/z 799.36

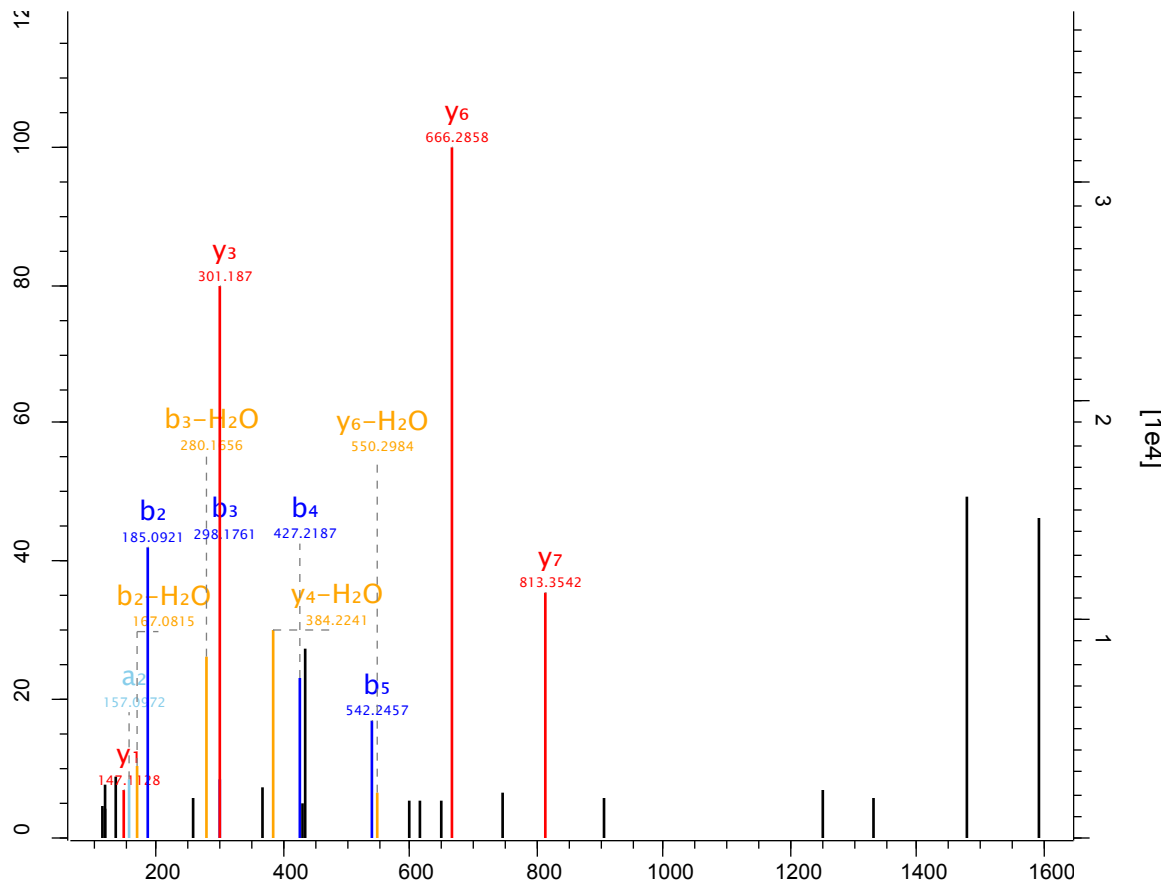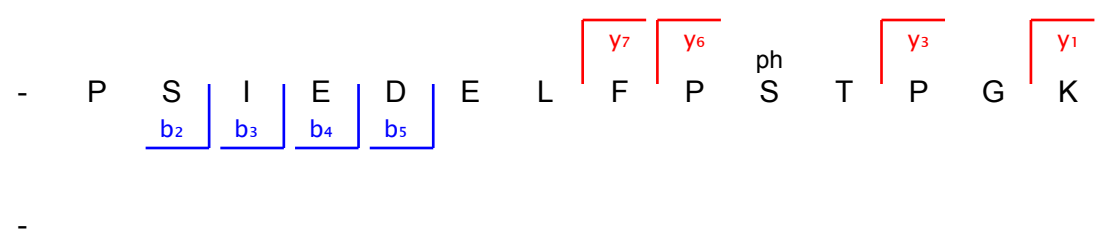



Raw file 2013\_COL15\_34\_38\_151128201608 Scan 31283 Method FTMS; HCD Score 61.28 m/z 636.29

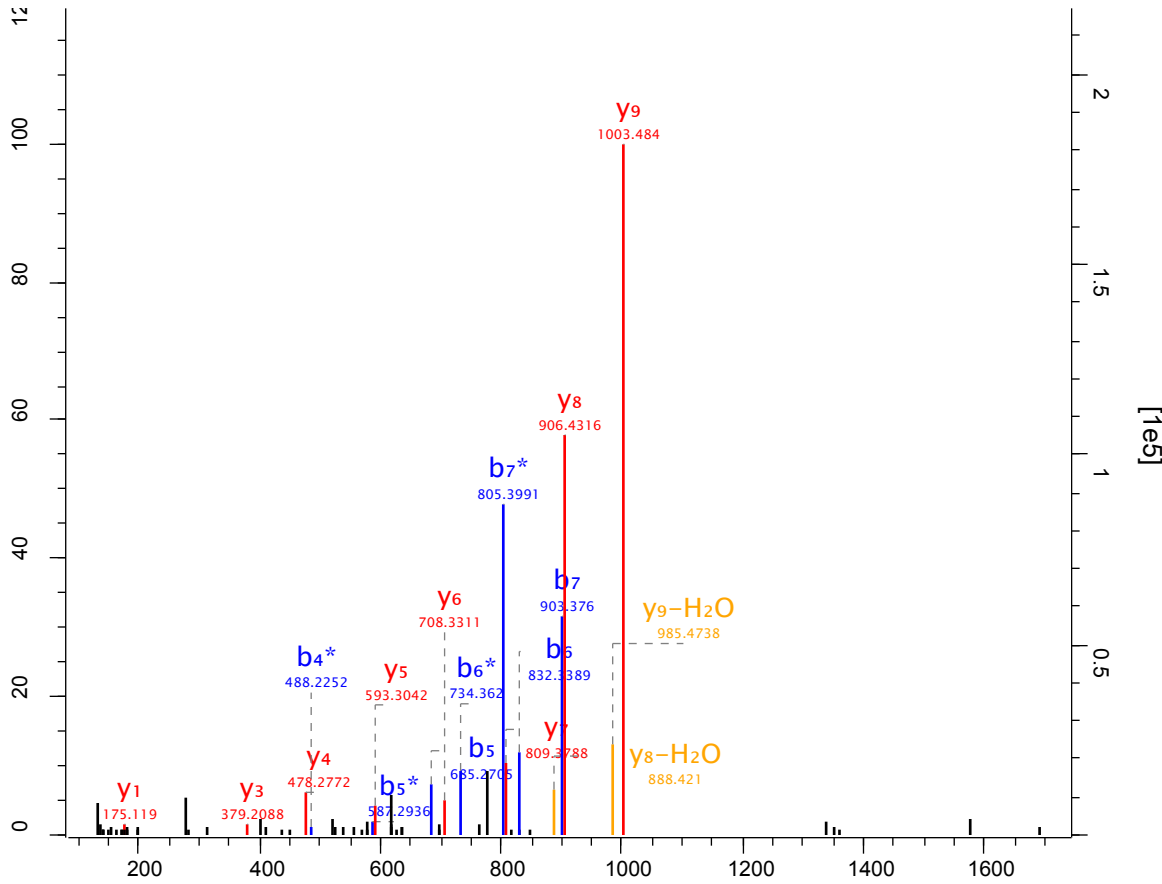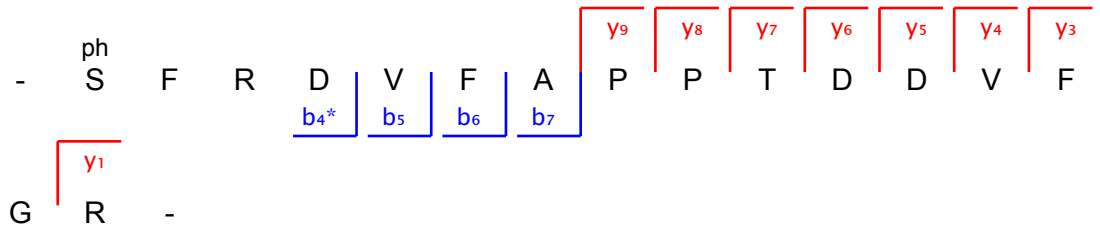

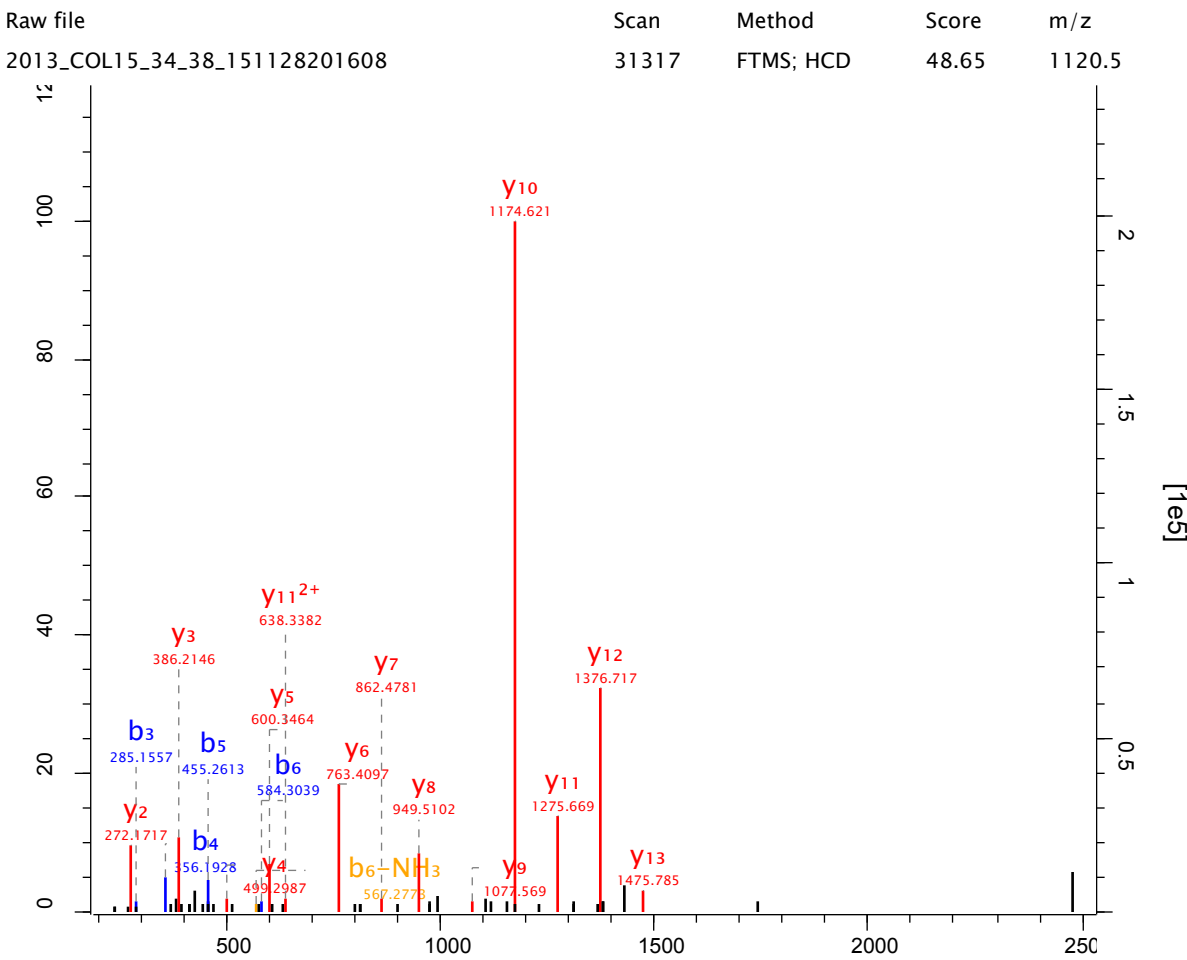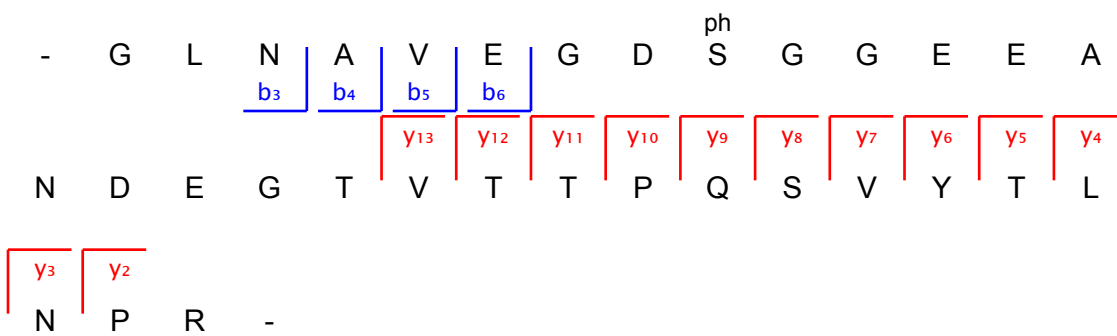

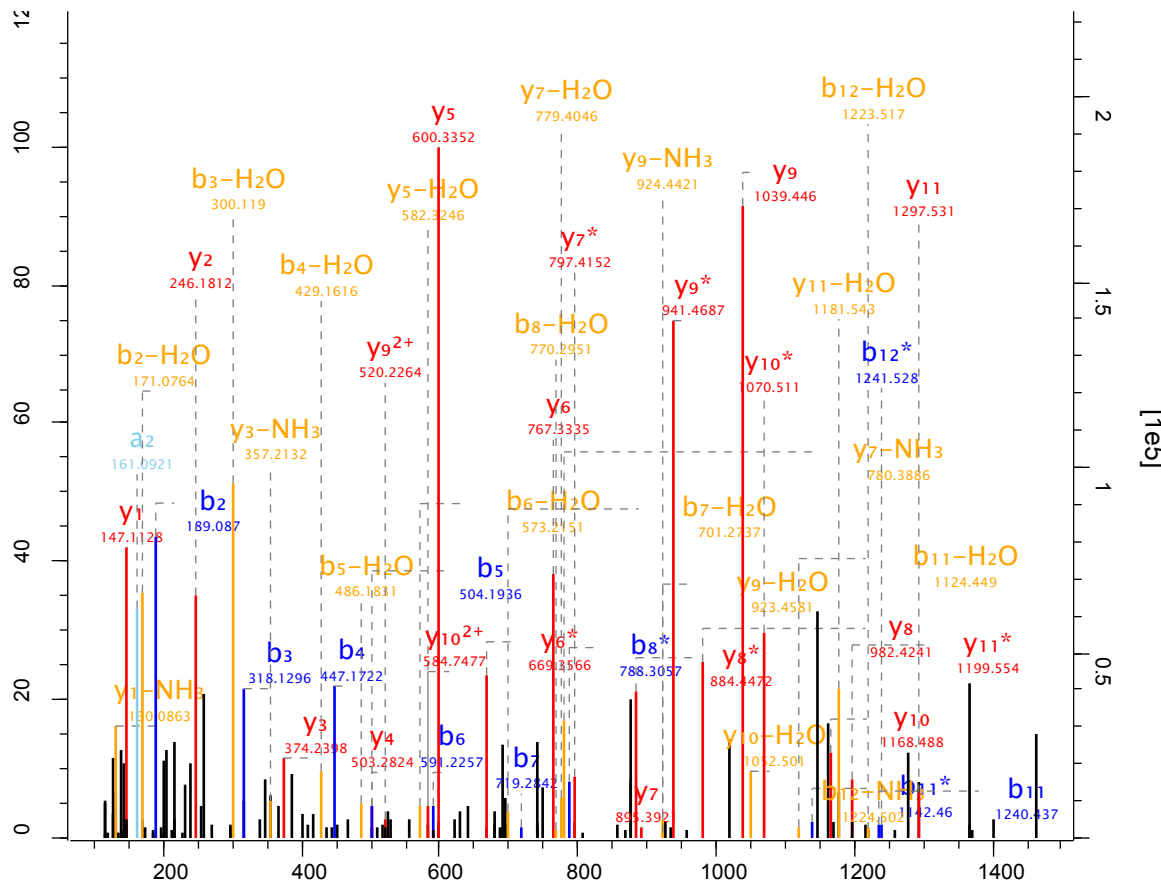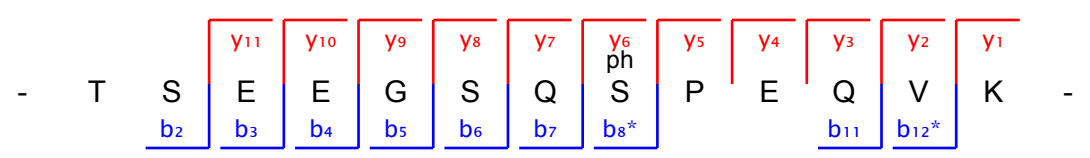

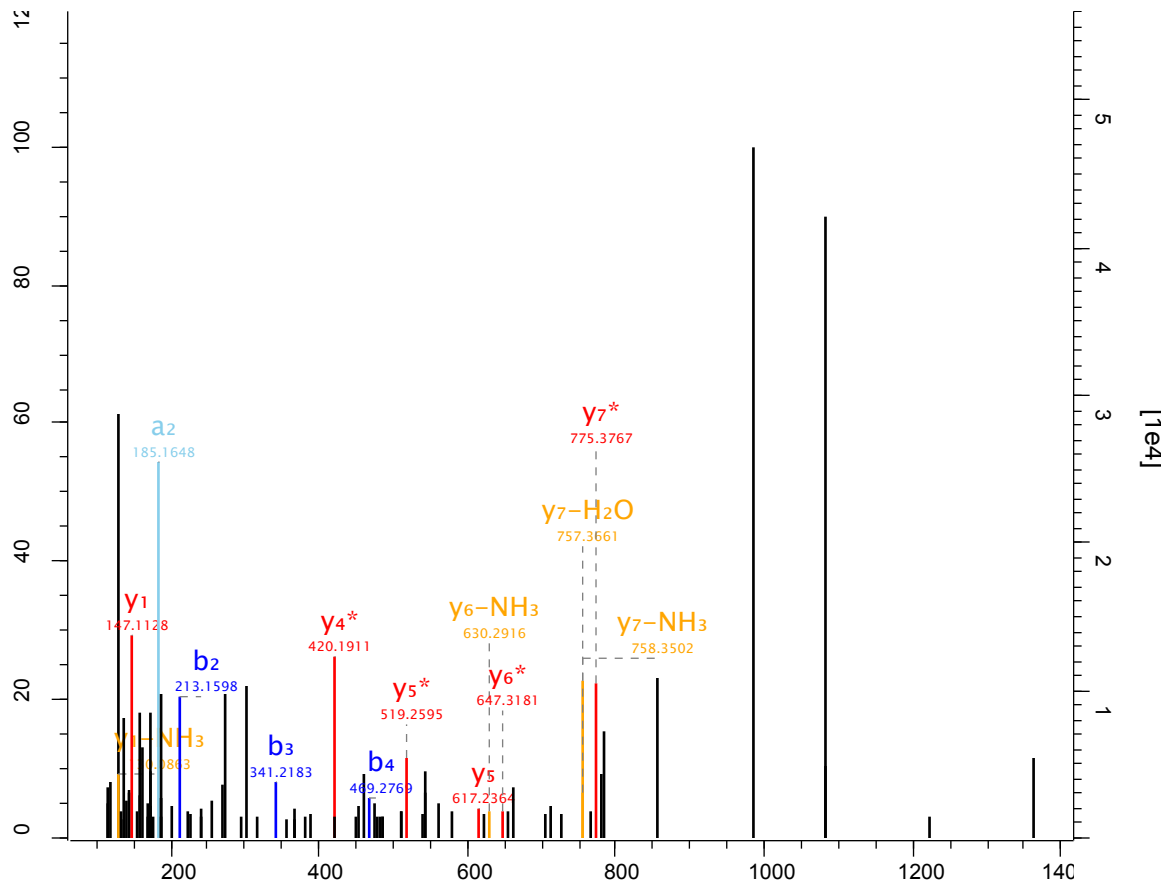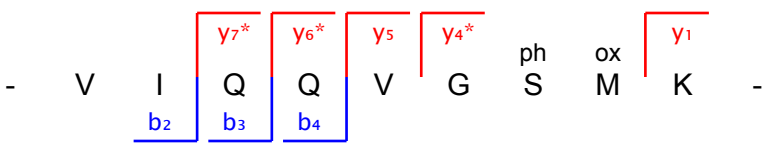

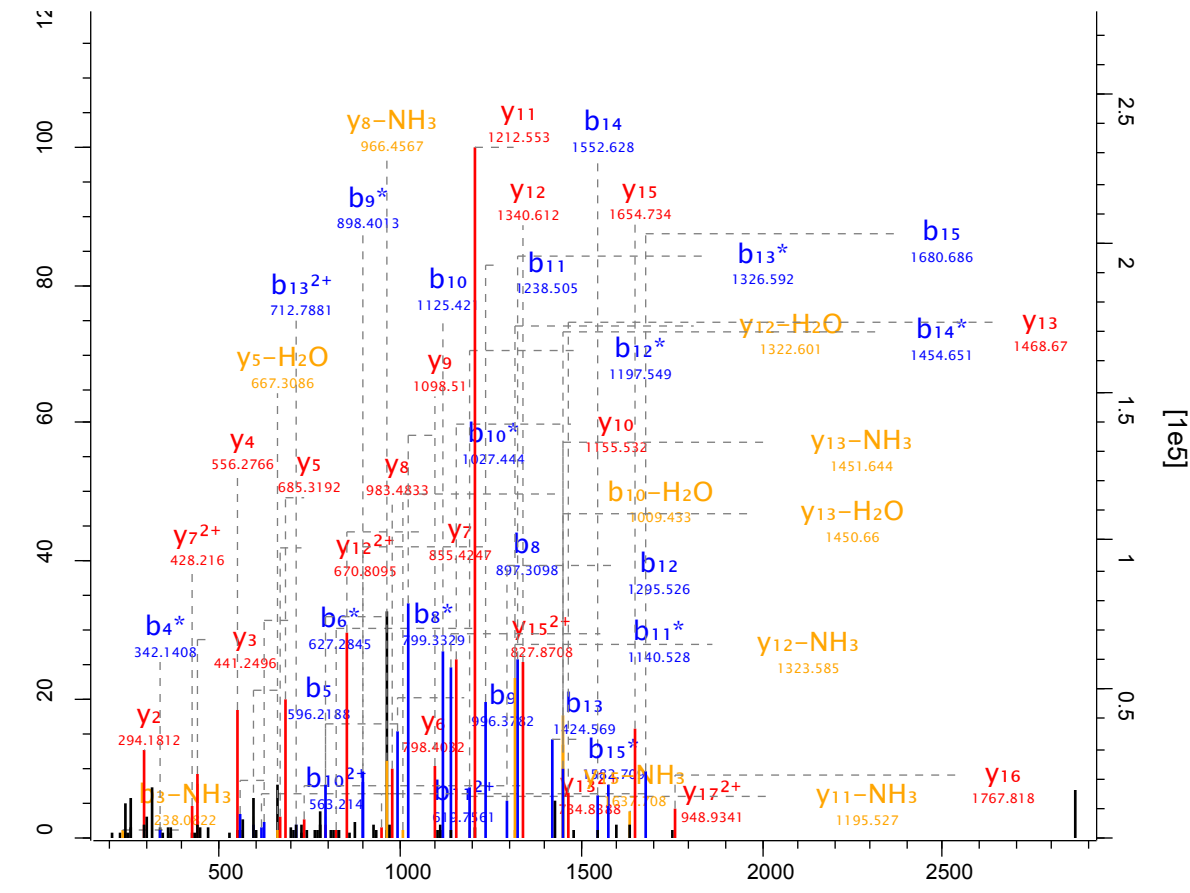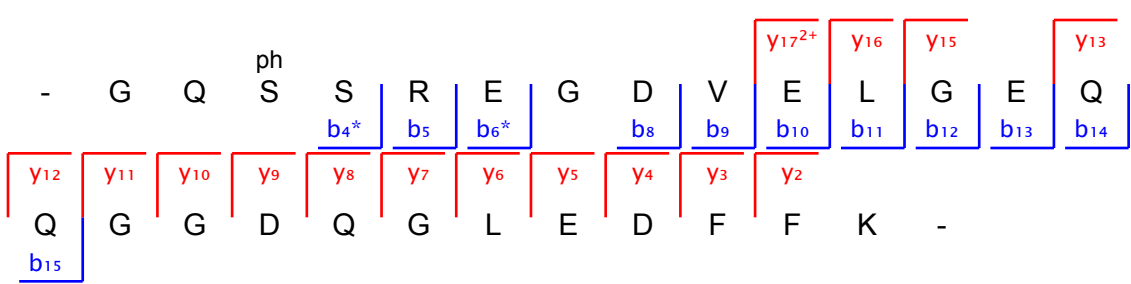

2013\_COL15\_34\_38\_151128201608

31721

FTMS; HCD

130.27

749.29

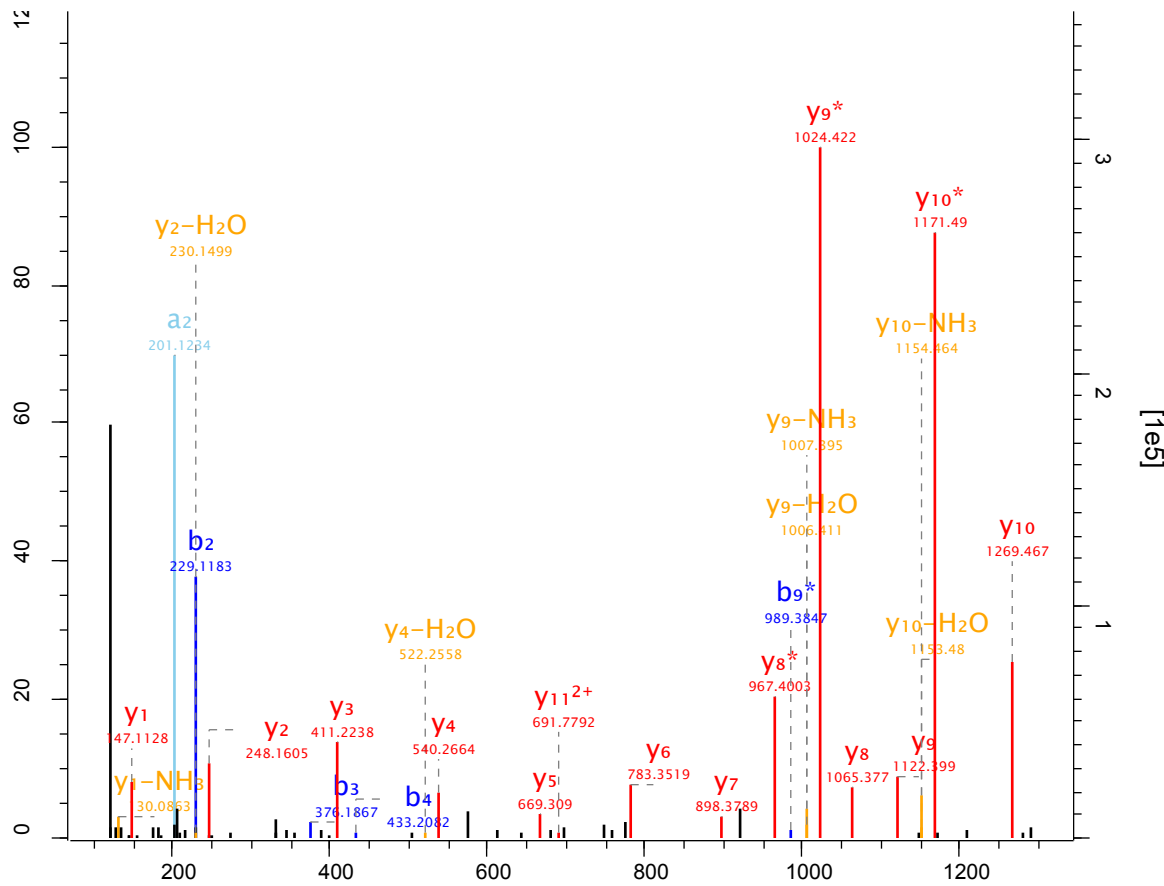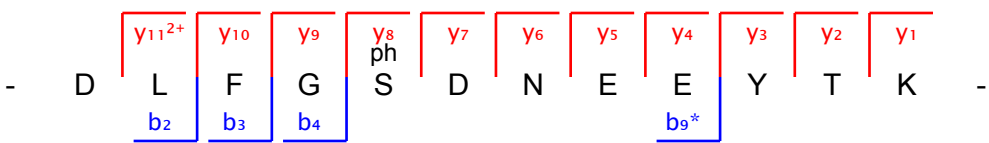

Raw file  
 2013\_COL15\_34\_38\_151128201608

Scan 3195 Method FTMS; HCD Score 94.02 m/z 426.19

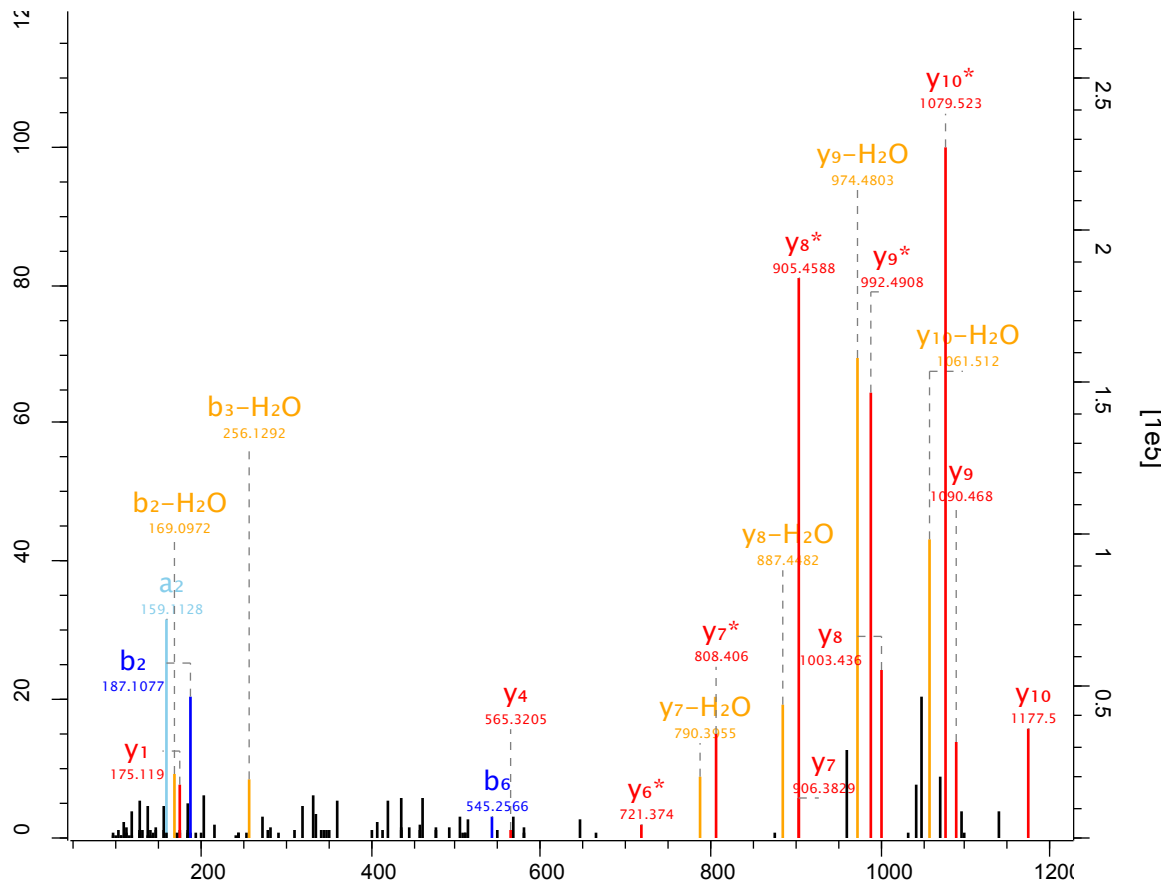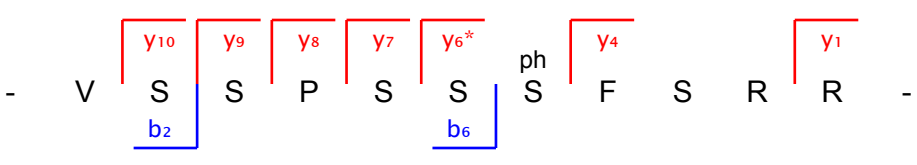

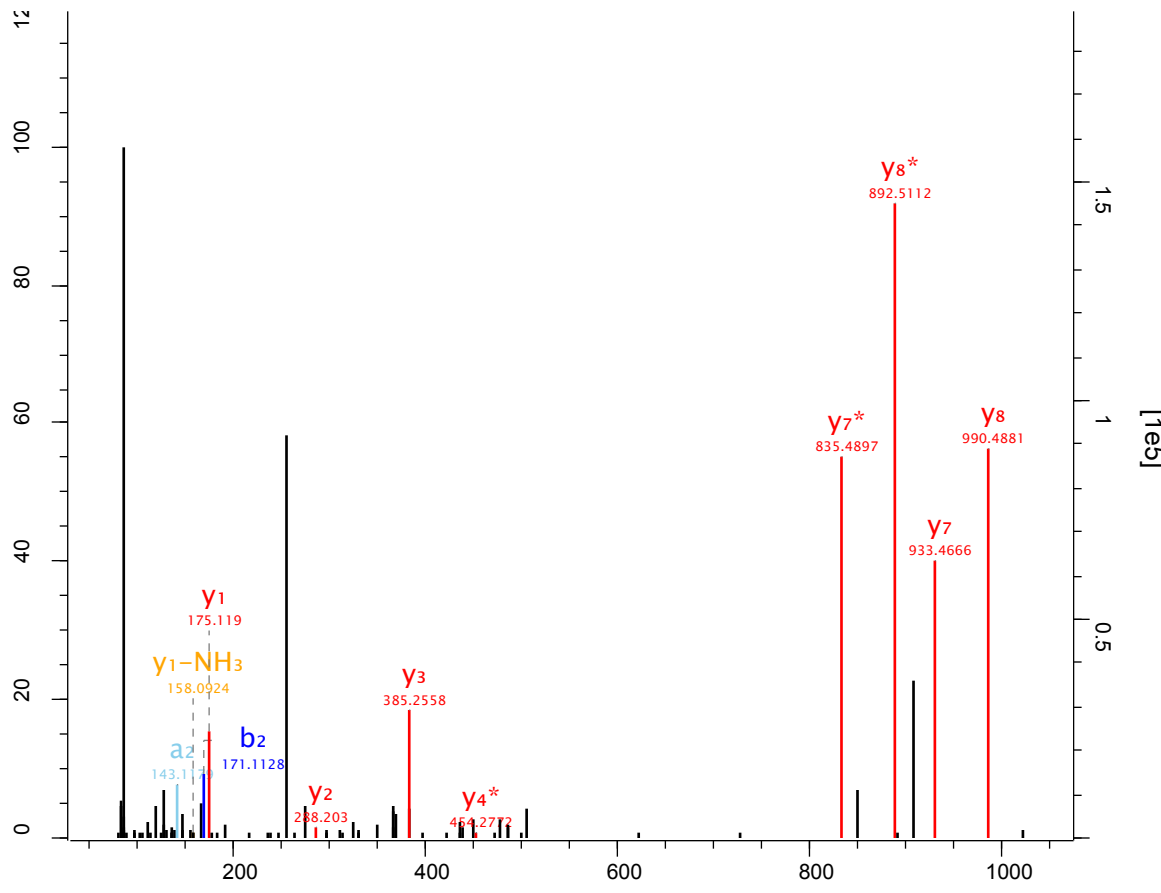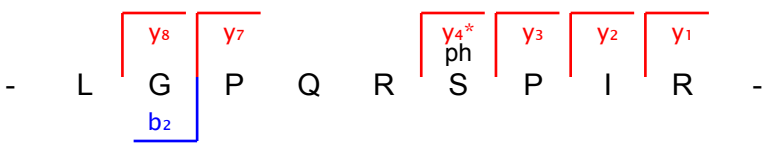



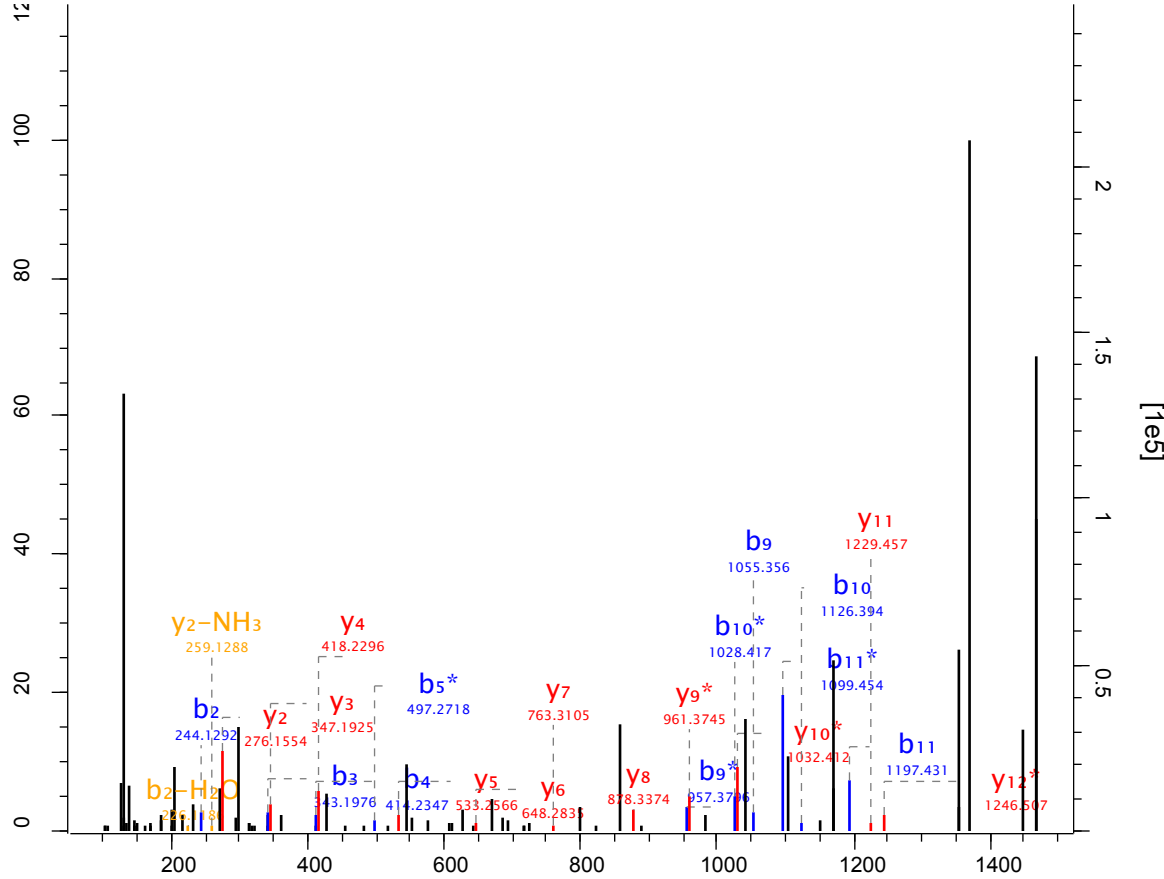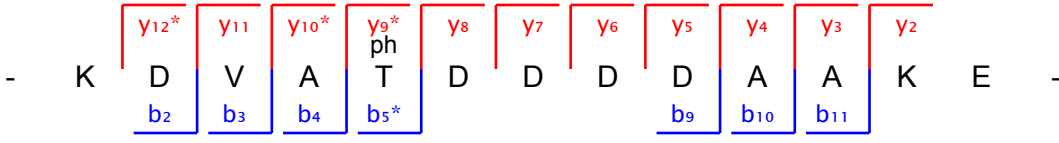

Raw file 2013\_COL15\_34\_38\_151128201608 Scan 32382 Method FTMS; HCD Score 48.57 m/z 660.8

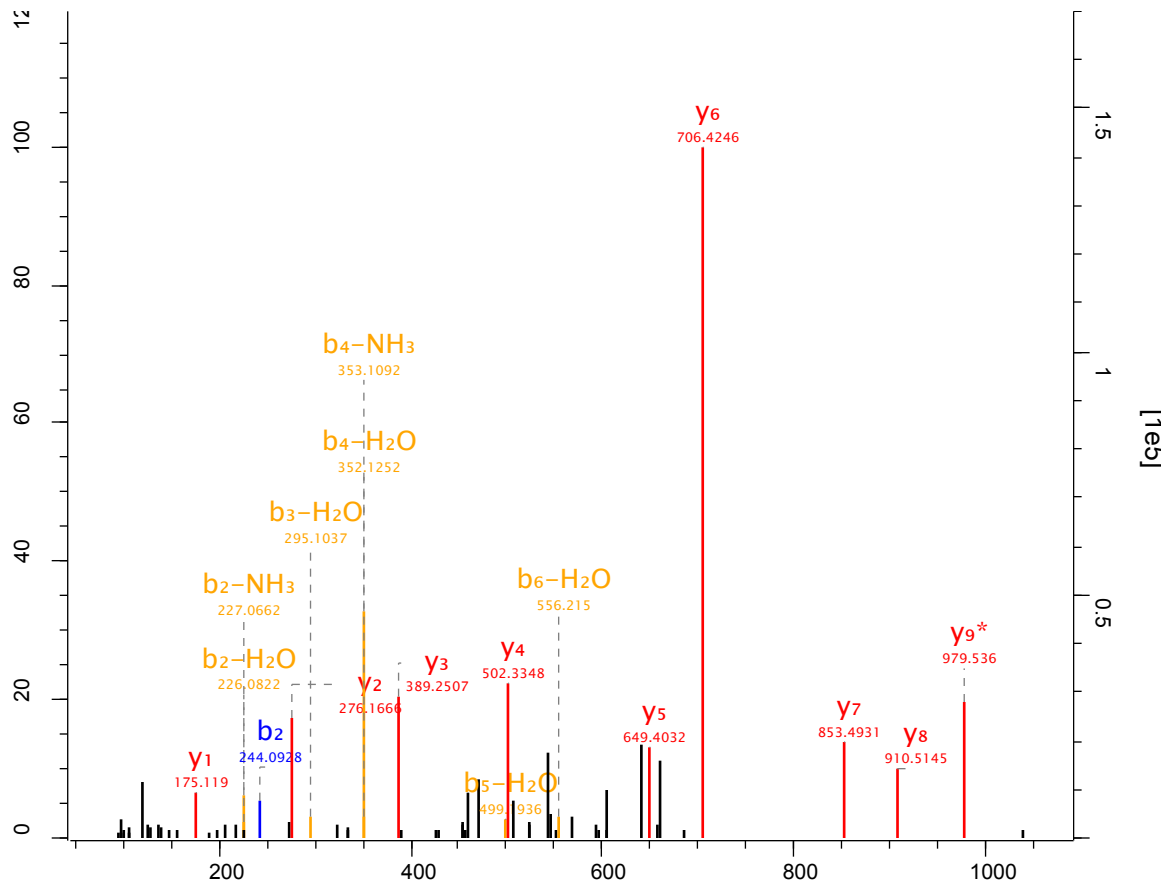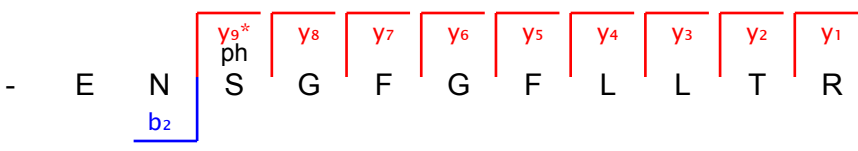

| Raw file                      | Scan  | Method    | Score | m/z    |
|-------------------------------|-------|-----------|-------|--------|
| 2013_COL15_34_38_151128201608 | 32486 | FTMS; HCD | 56.68 | 810.02 |

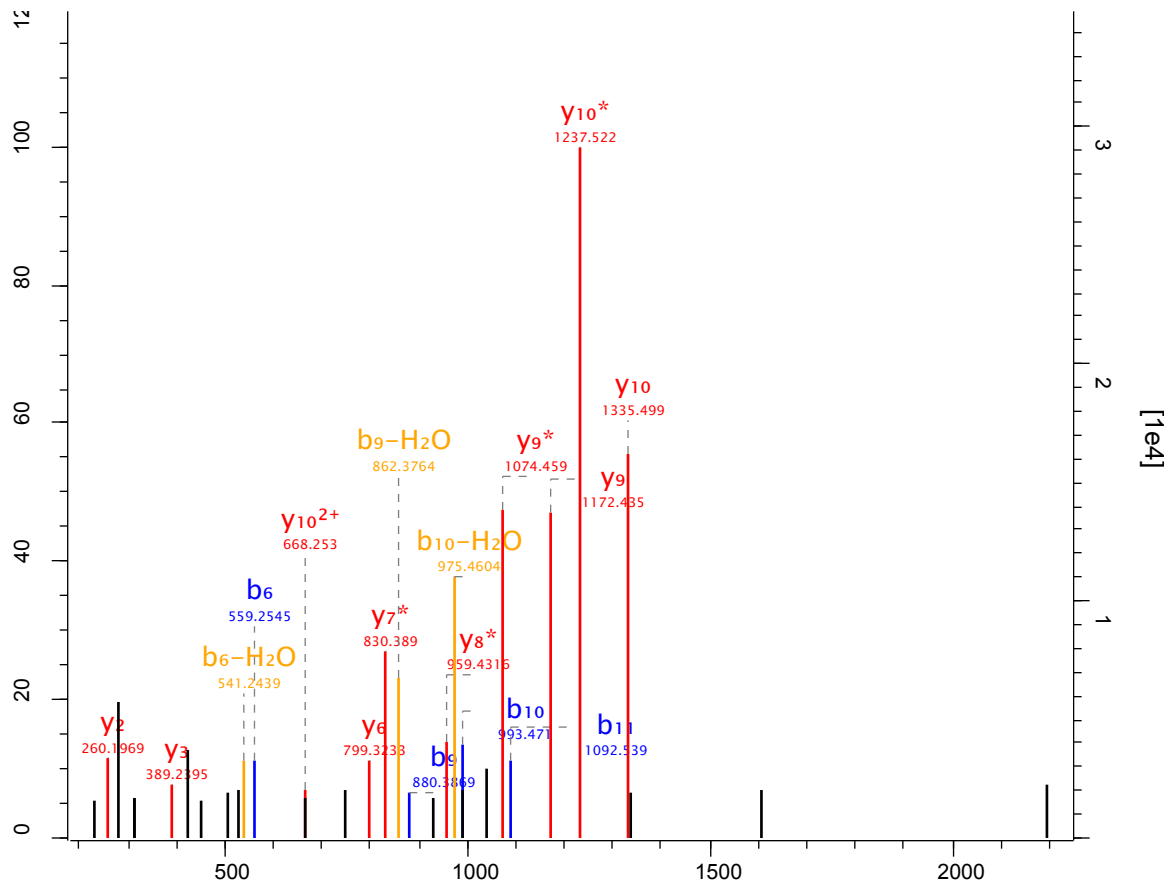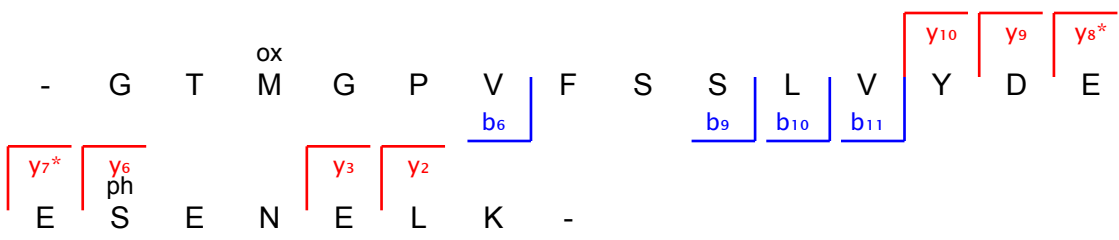

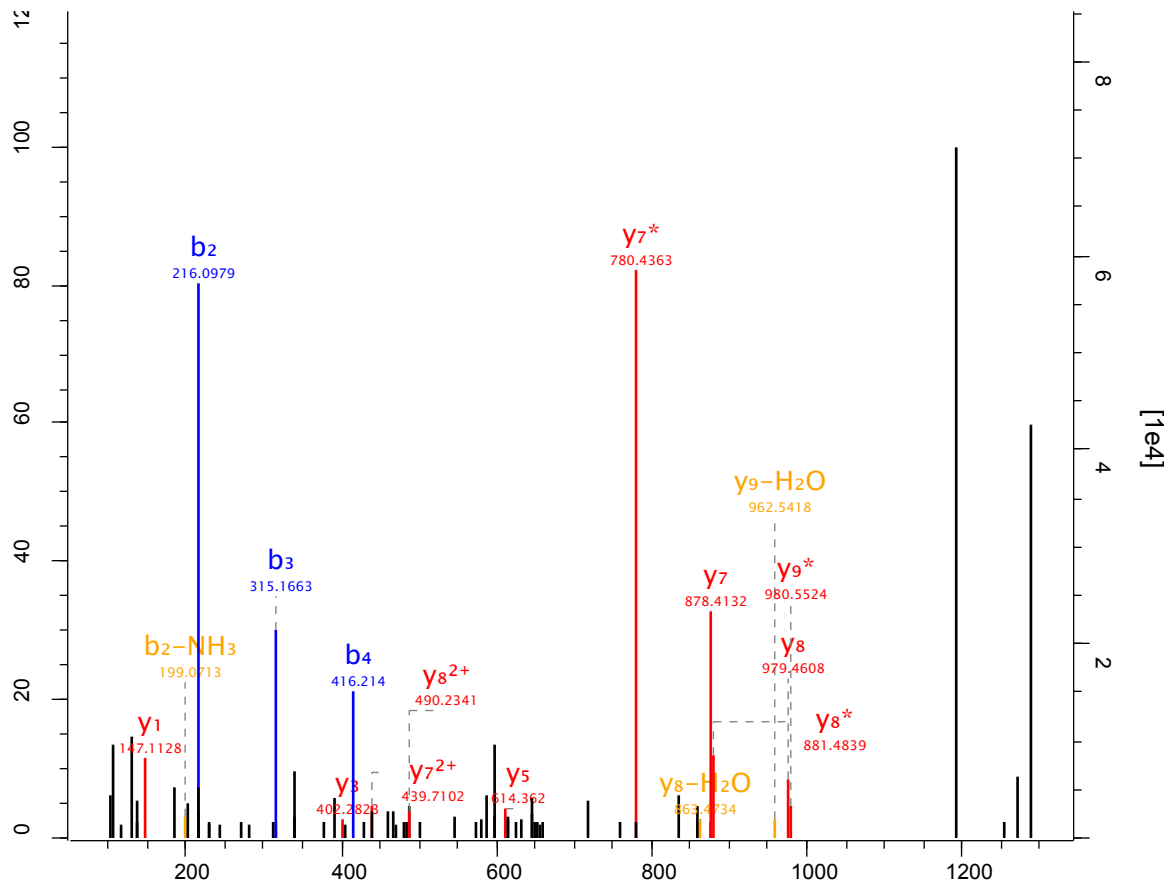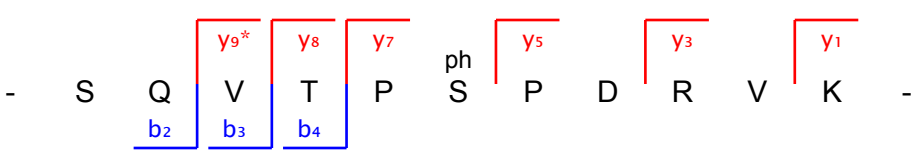

| Raw file                      | Scan | Method    | Score | m/z    |
|-------------------------------|------|-----------|-------|--------|
| 2013_COL15_34_38_151128201608 | 3263 | FTMS; HCD | 61.21 | 354.83 |

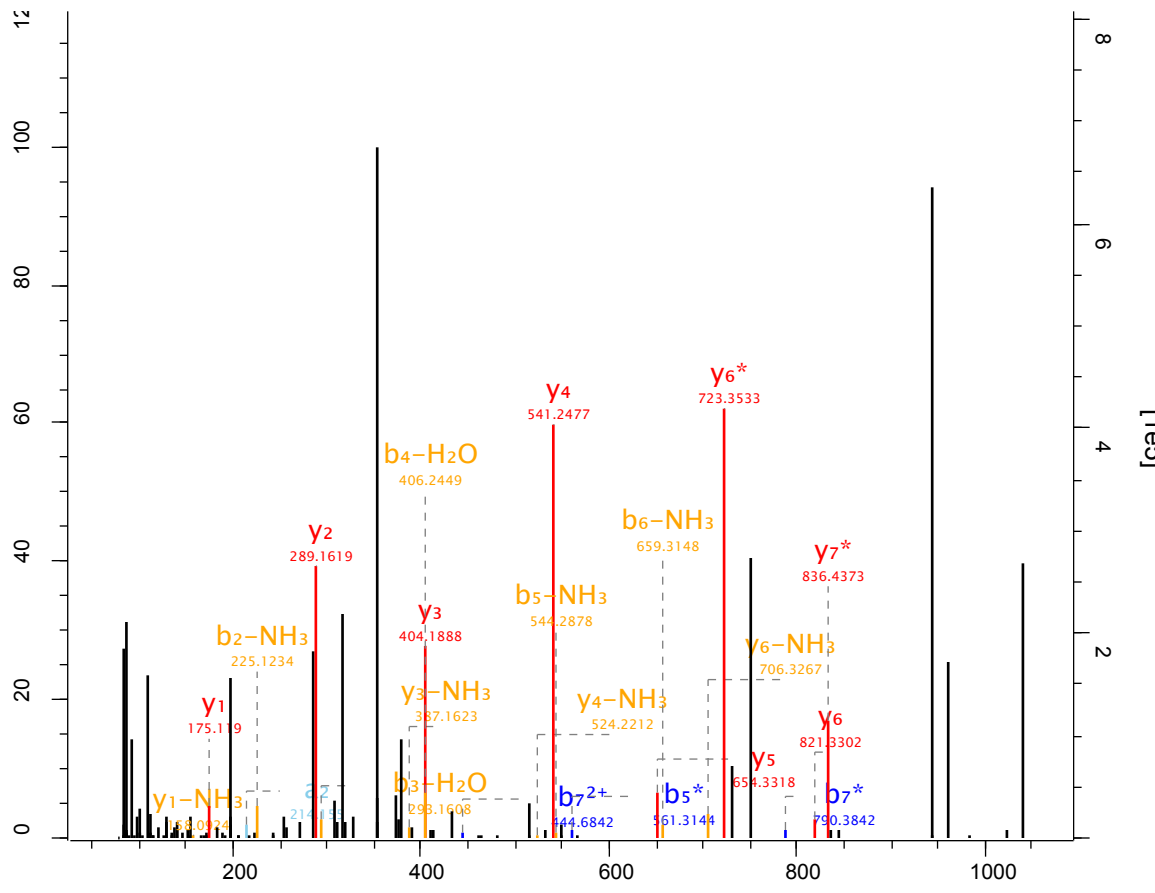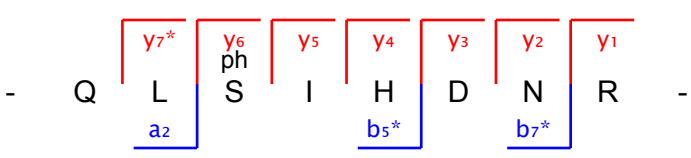

Raw file 2013\_COL15\_34\_38\_151128201608 Scan 3287 Method FTMS; HCD Score 49.3 m/z 451.23

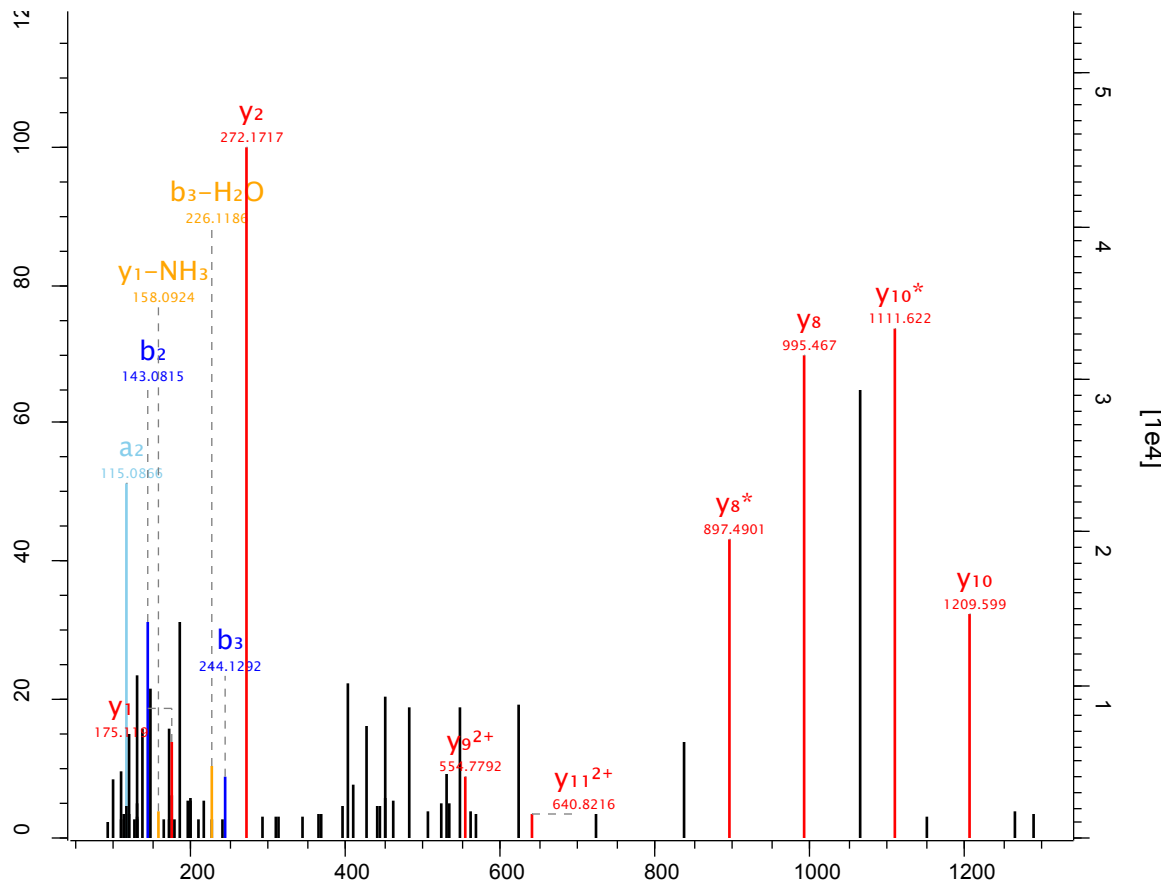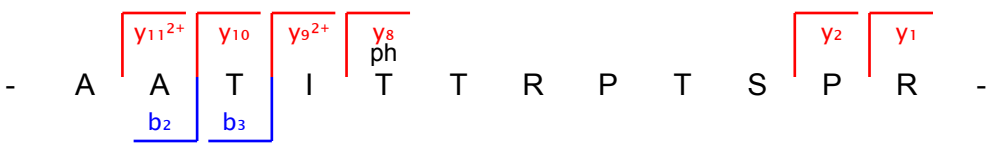

| Raw file                      | Scan  | Method    | Score | m/z    |
|-------------------------------|-------|-----------|-------|--------|
| 2013_COL15_34_38_151128201608 | 32918 | FTMS; HCD | 70.45 | 1032.9 |

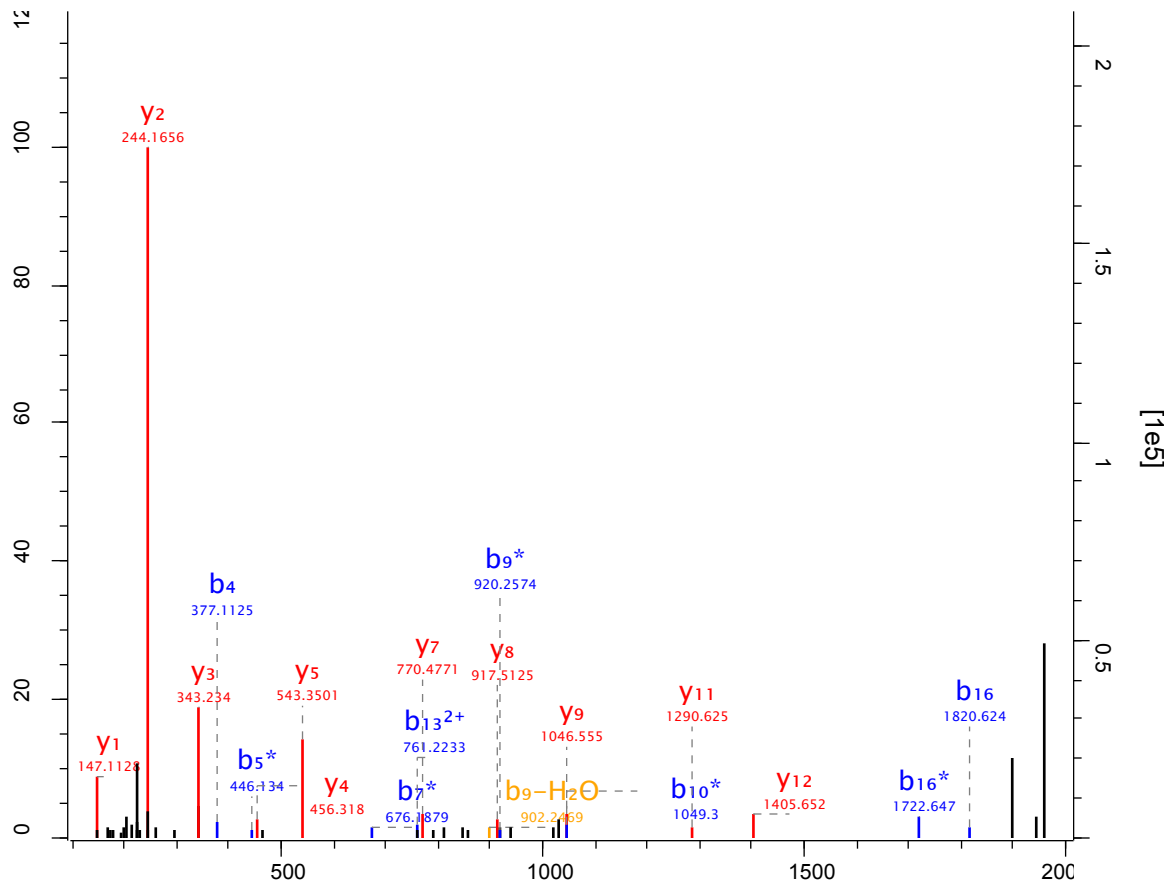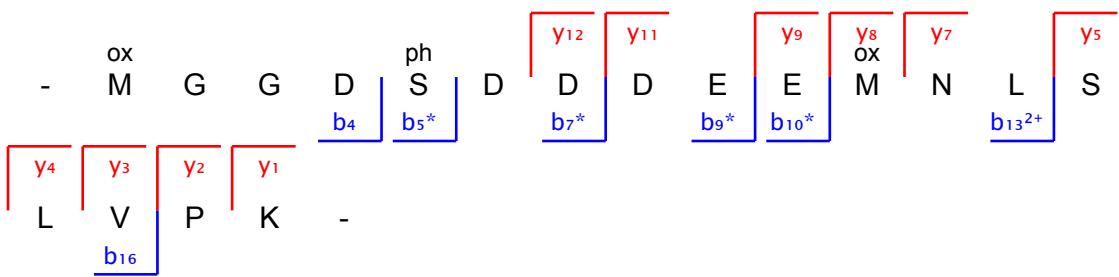

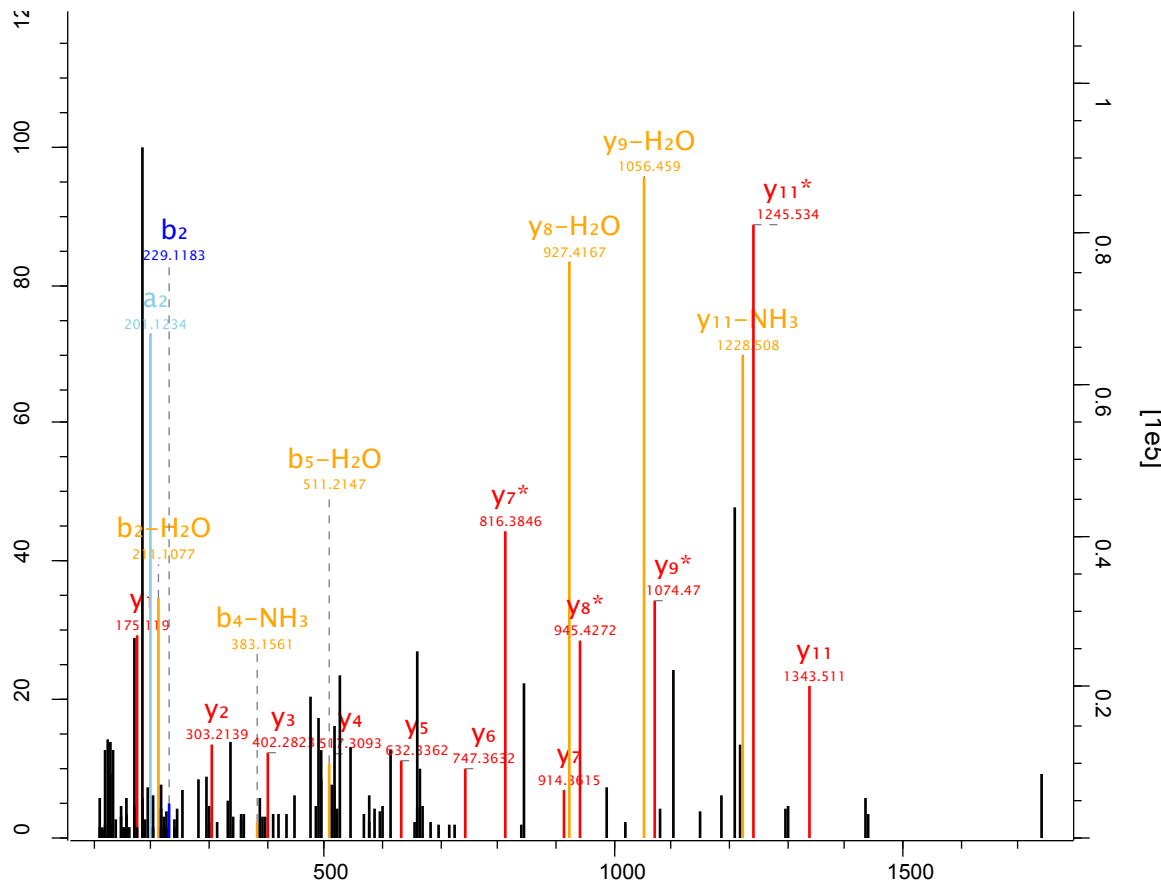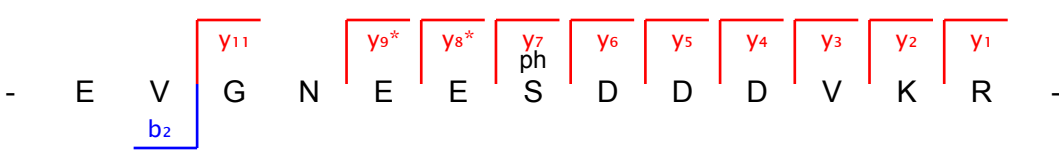



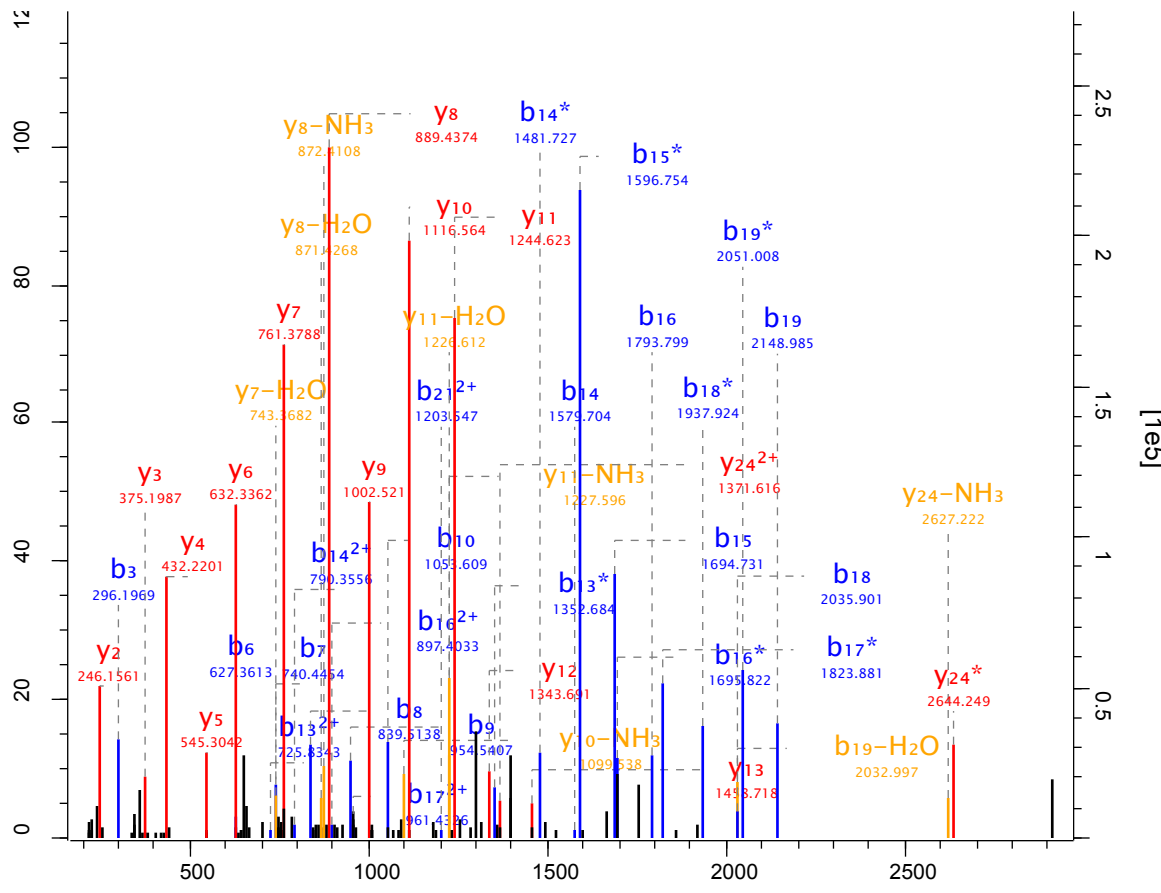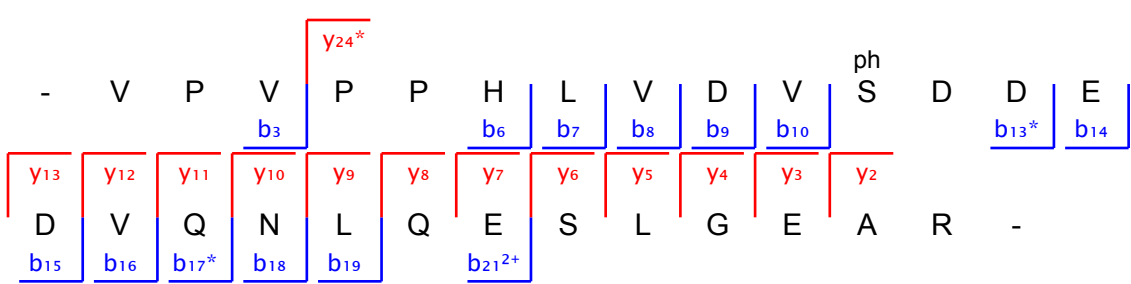

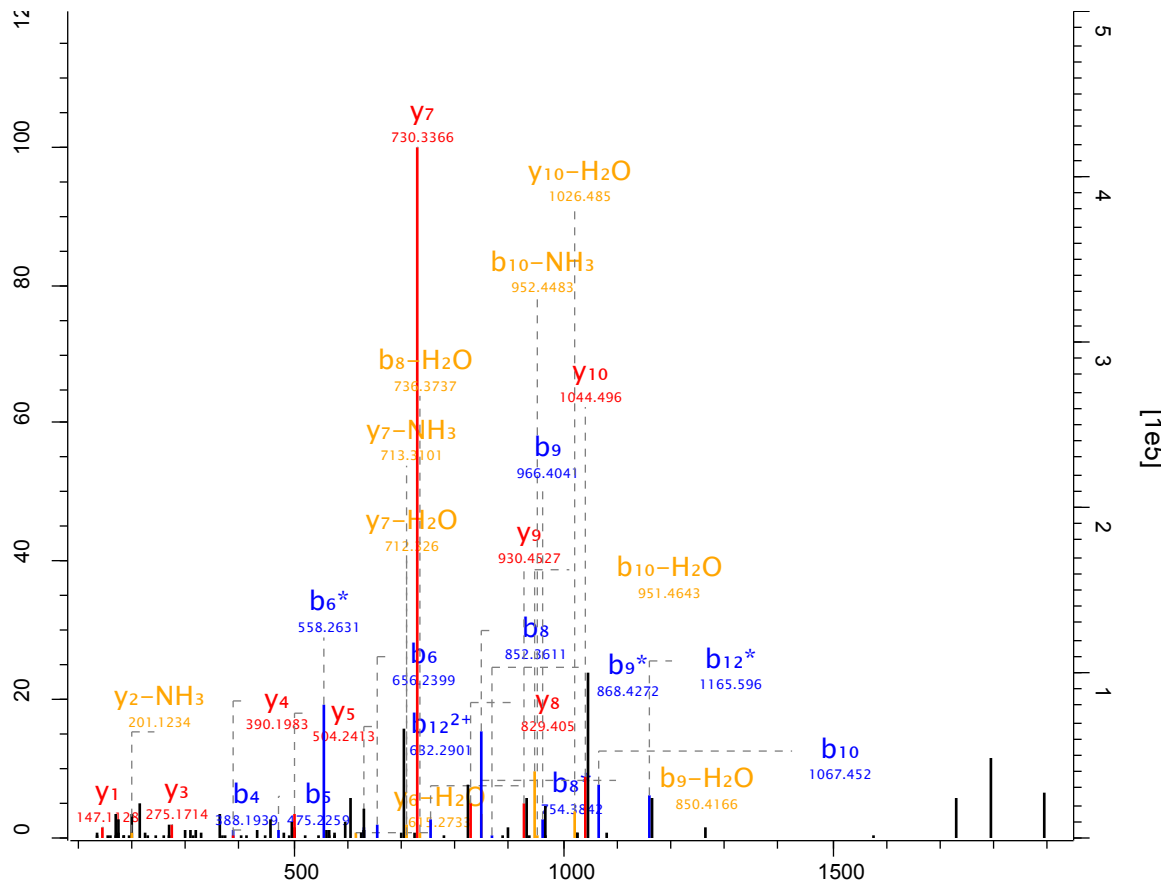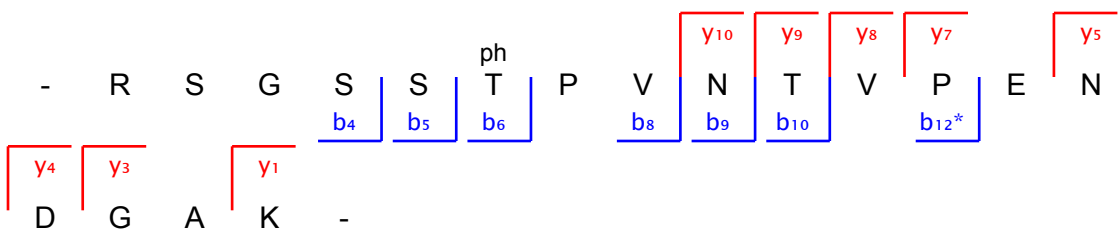

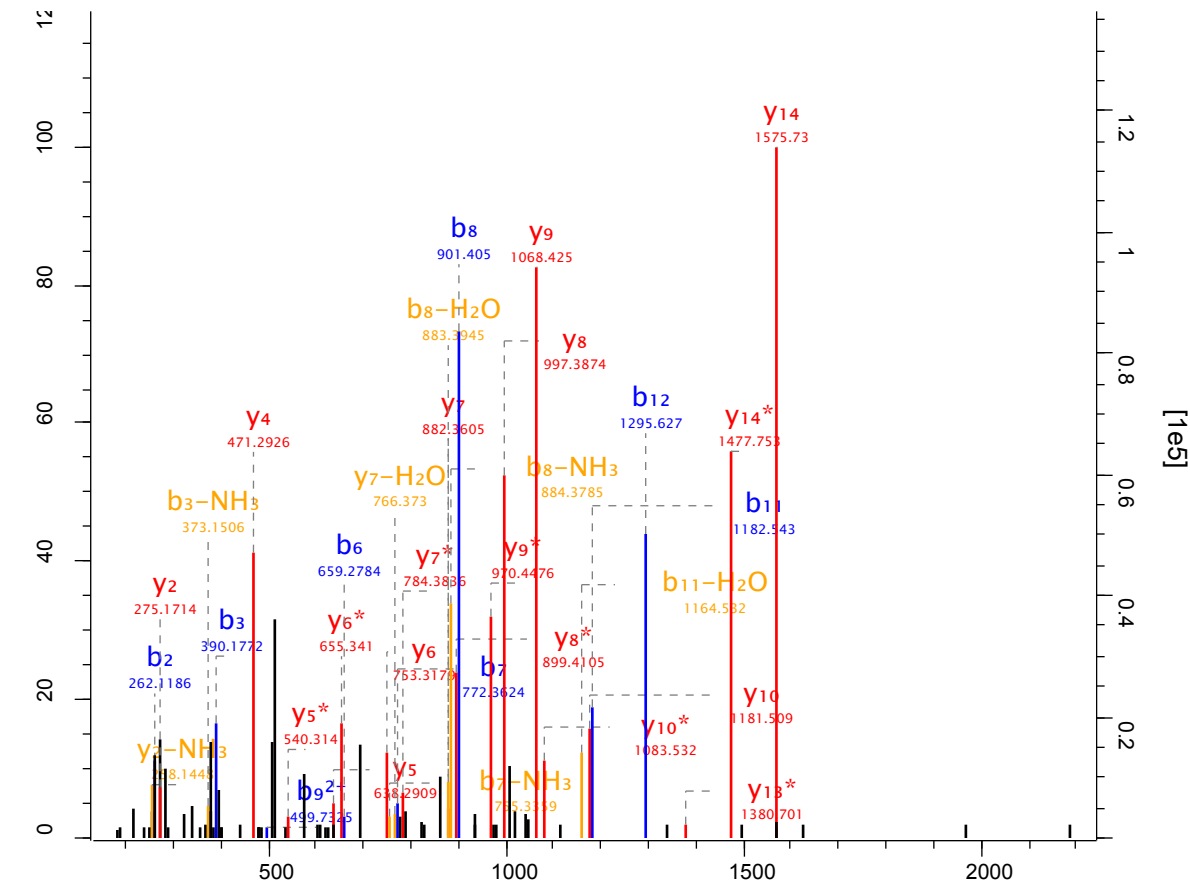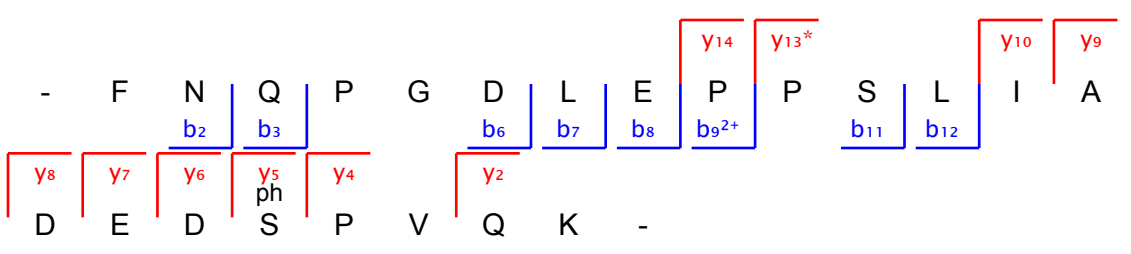

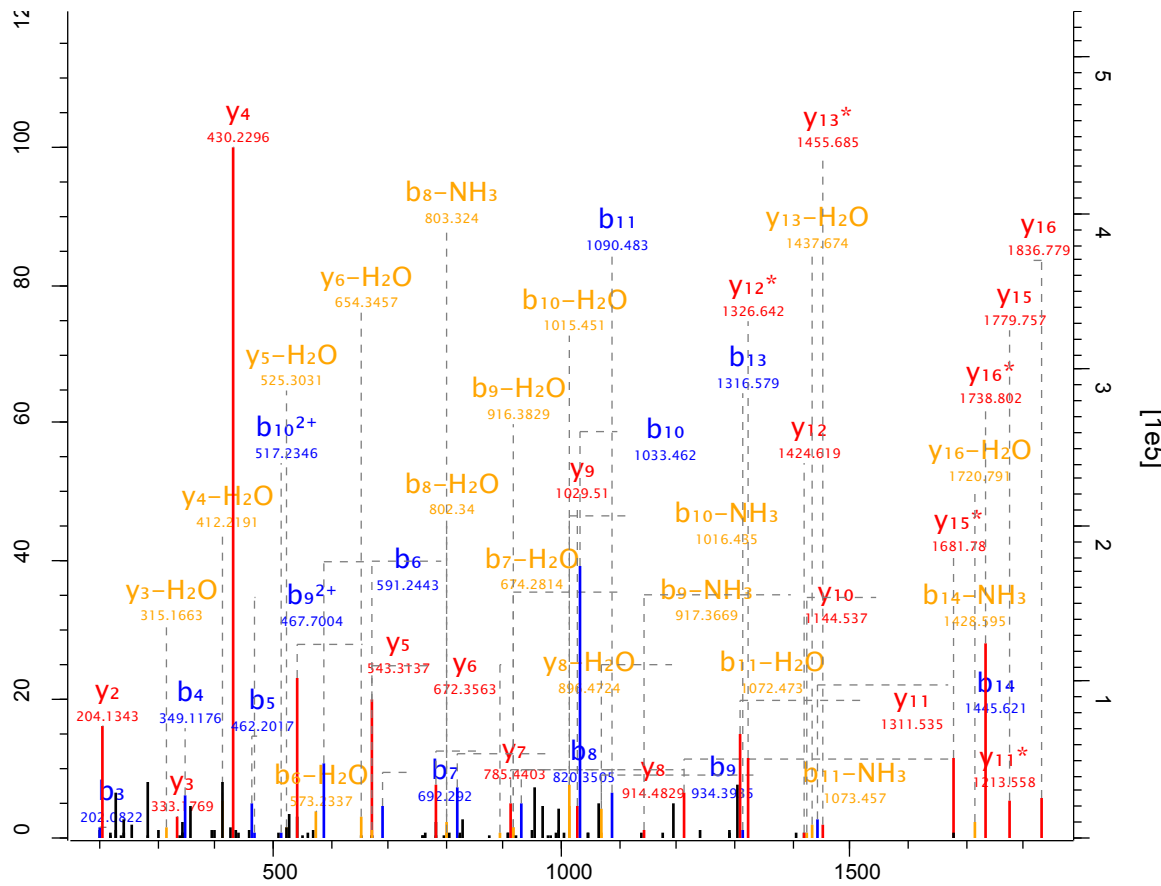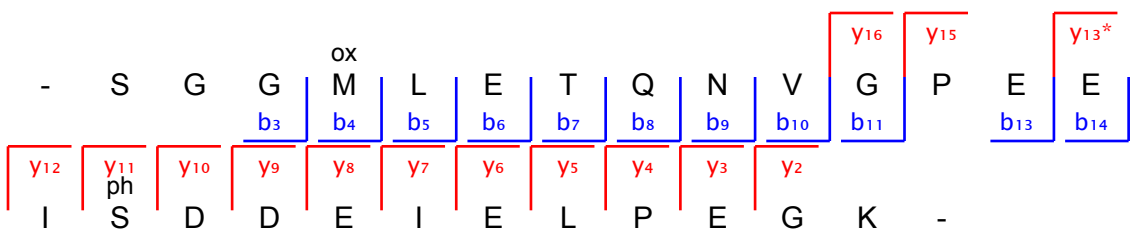

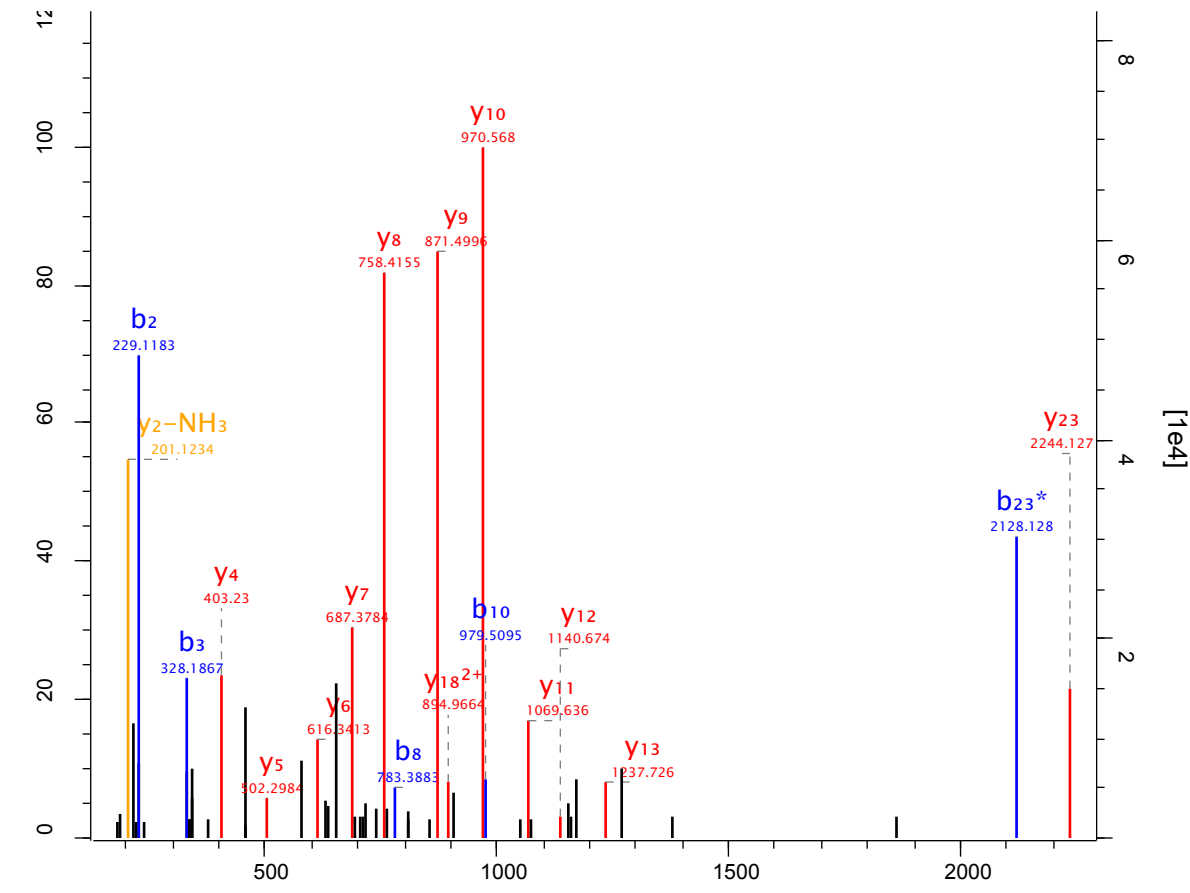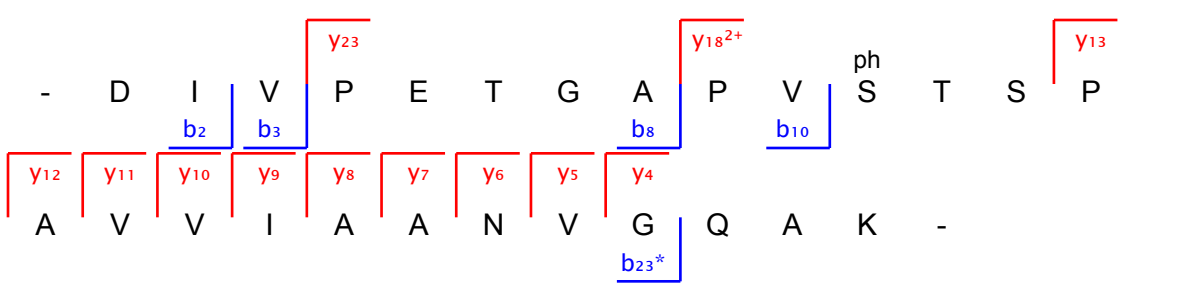

2013\_COL15\_34\_38\_151128201608

3421

FTMS; HCD

123.86

504.23

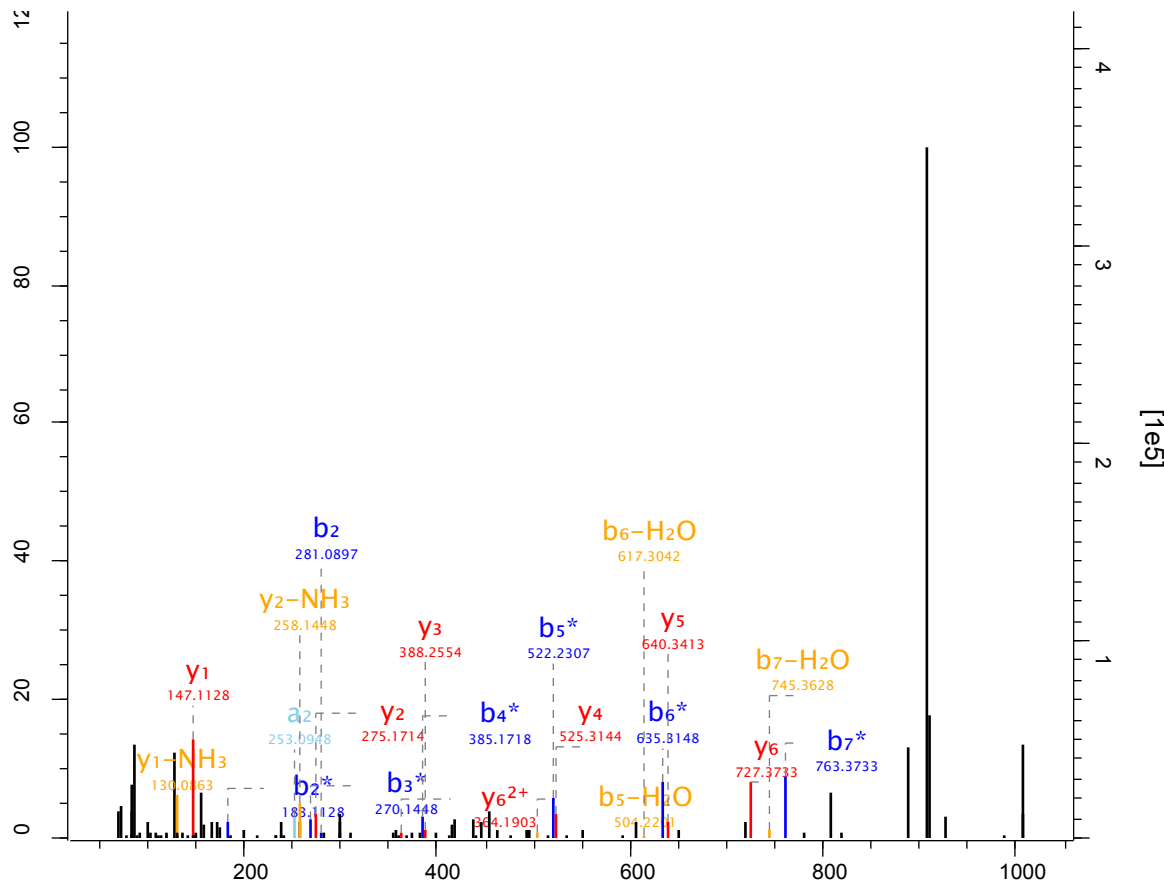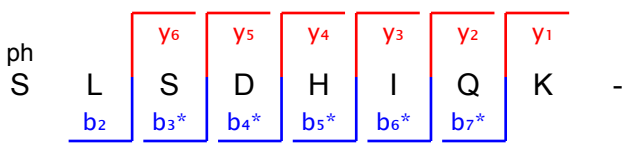

Raw file Scan Method Score m/z  
 2013\_COL15\_34\_38\_151128201608 34565 FTMS; HCD 94.59 691.65

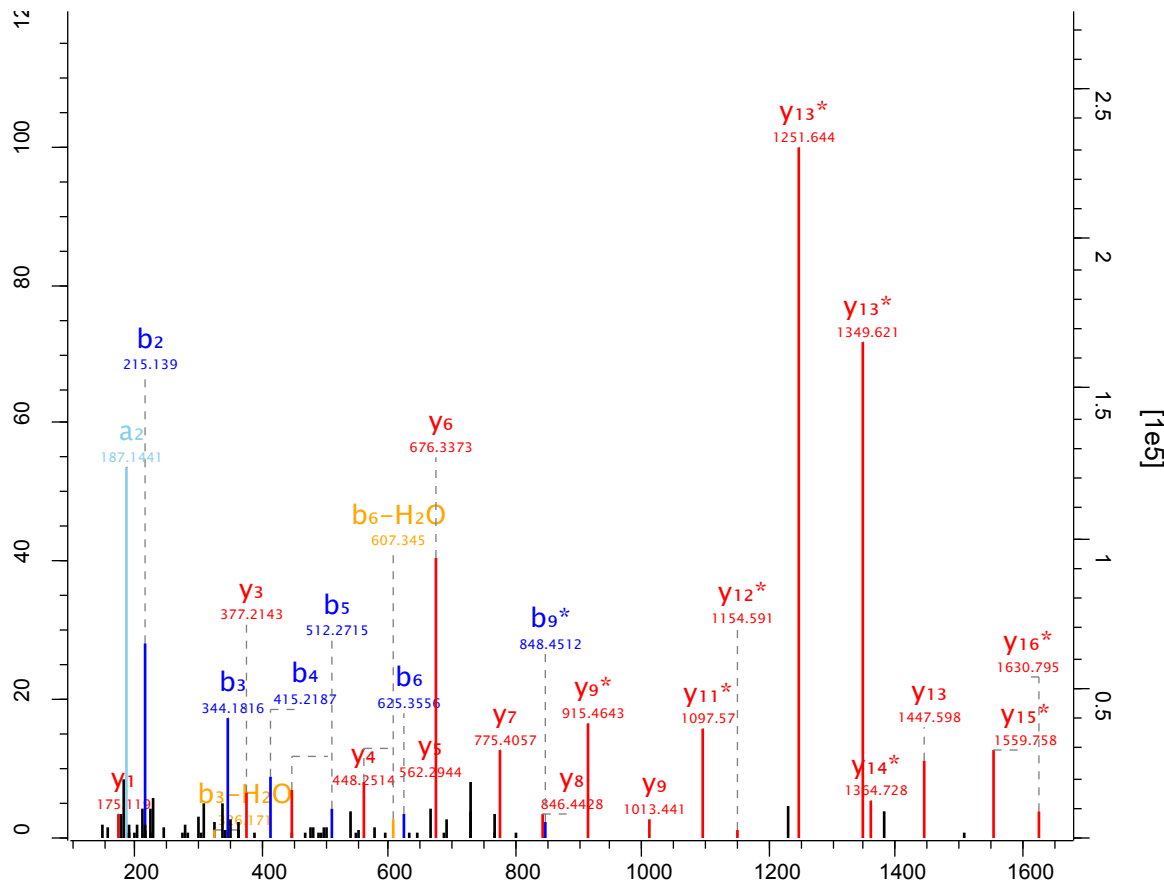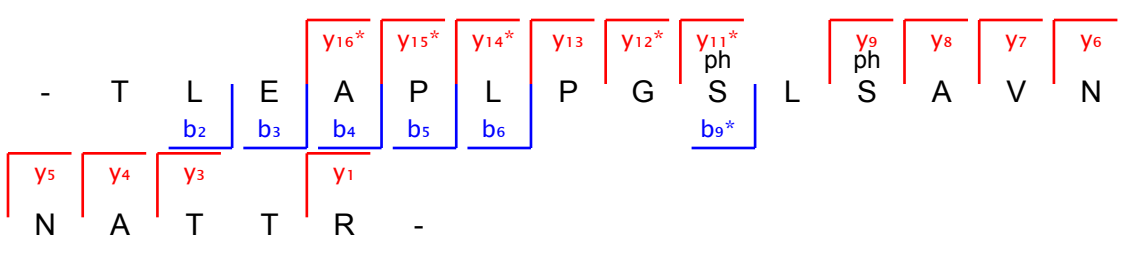

Raw file Scan Method Score m/z  
 2013\_COL15\_34\_38\_151128201608 3461 FTMS; HCD 60.33 524.89

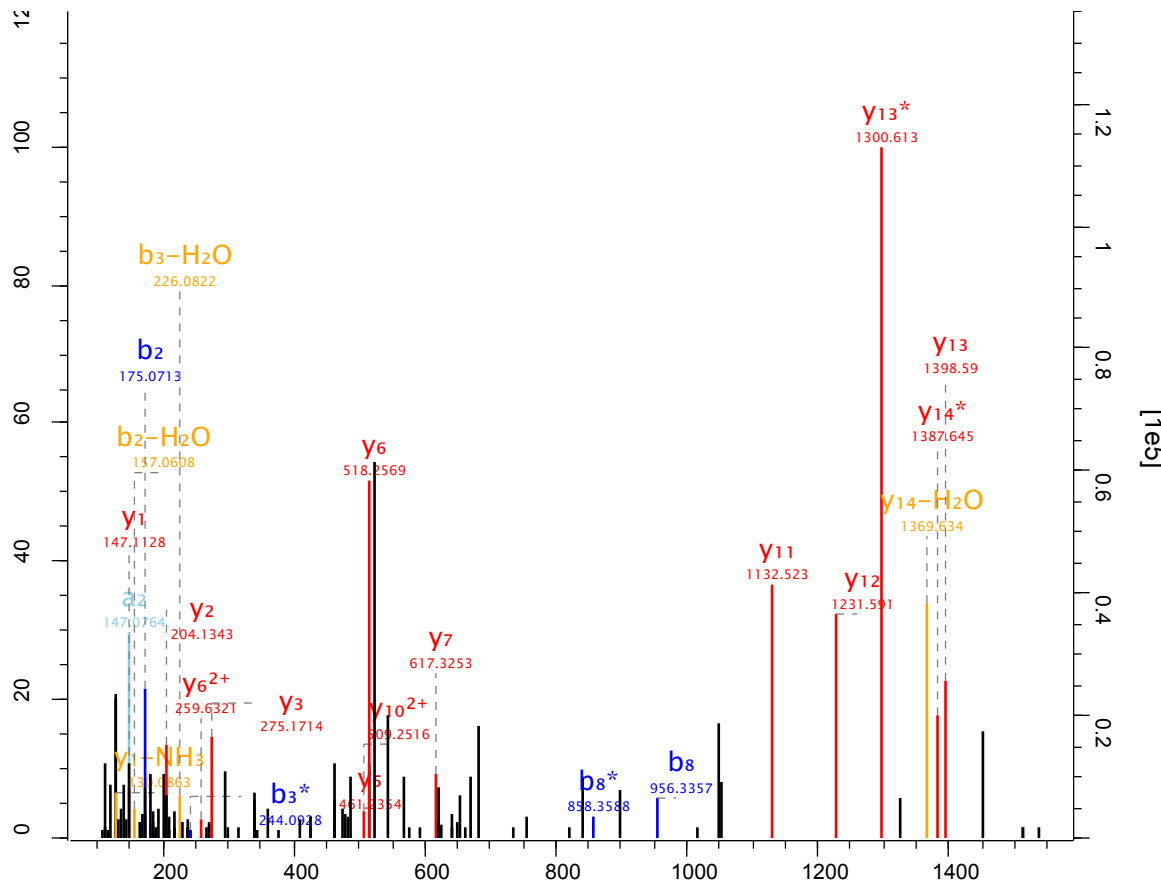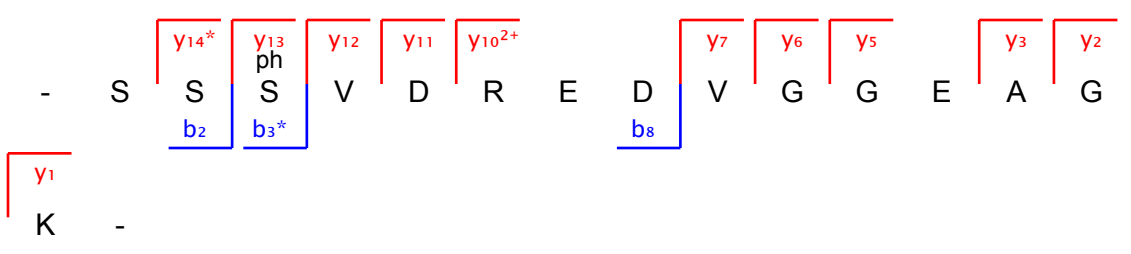



Raw file 2013\_COL15\_34\_38\_151128201608 Scan 3547 Method FTMS; HCD Score 45.36 m/z 624.27

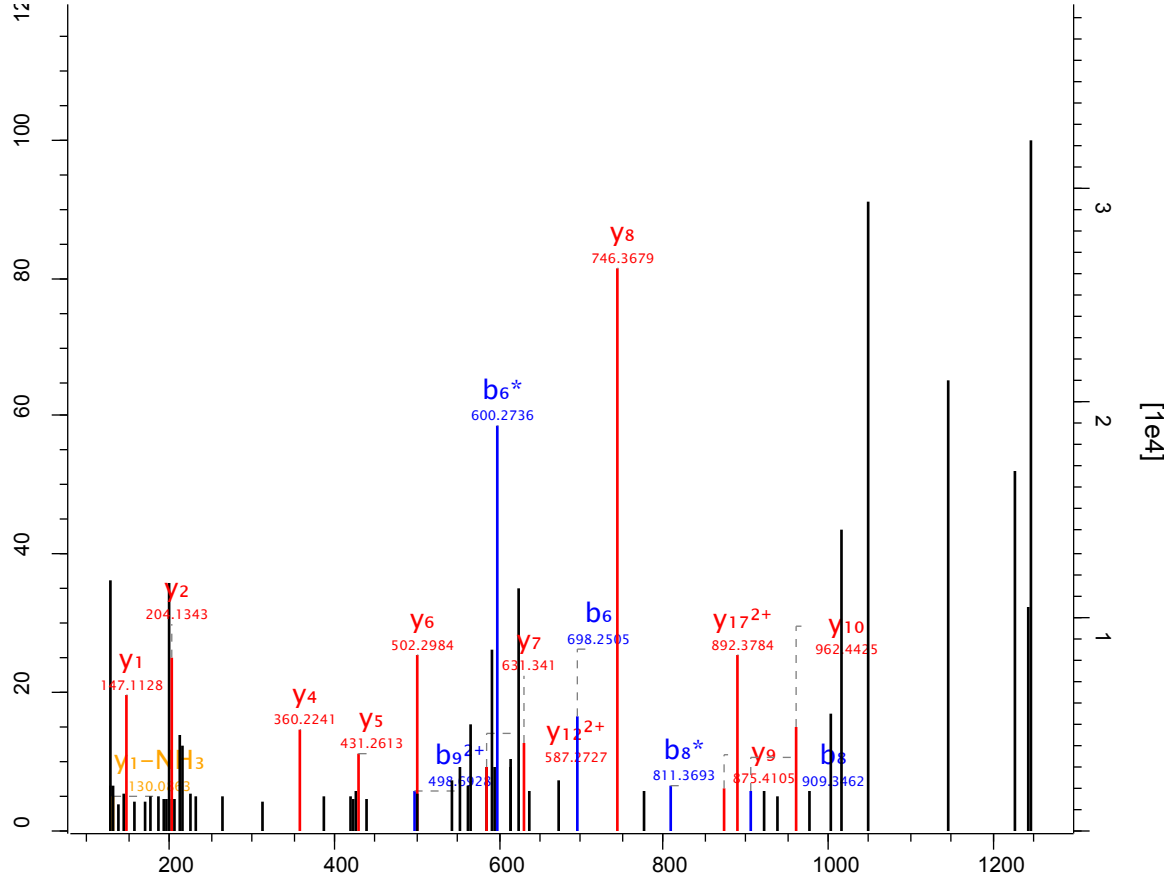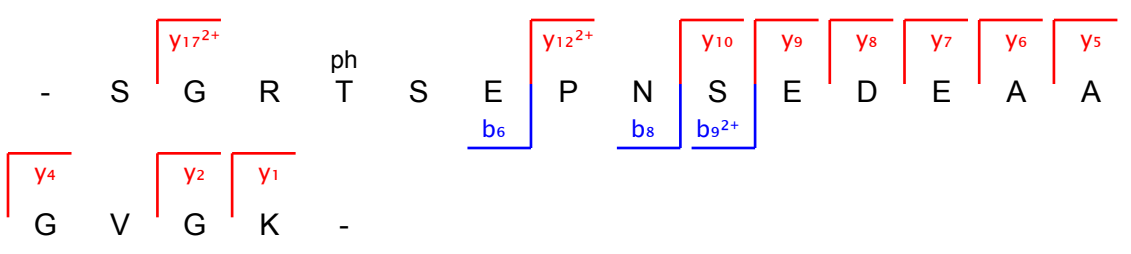

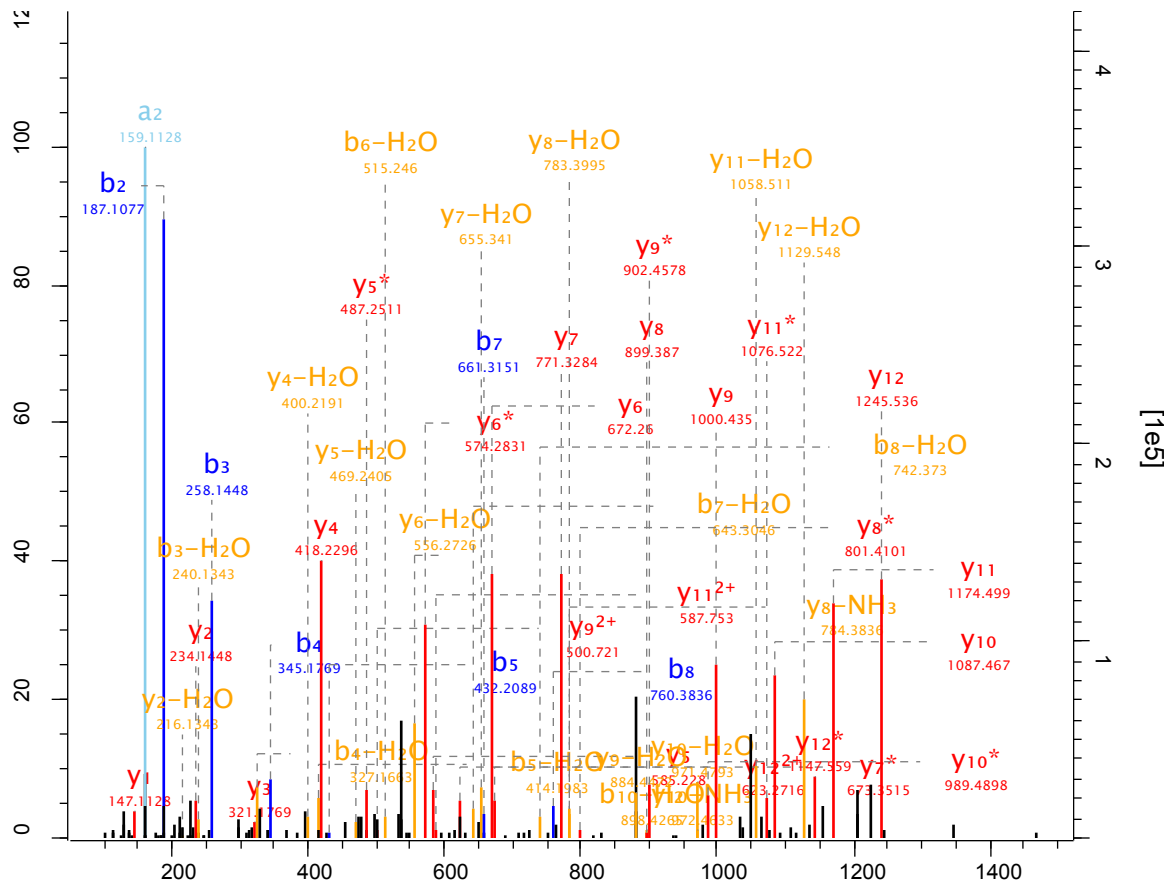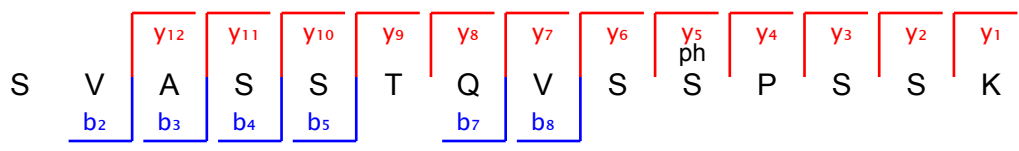

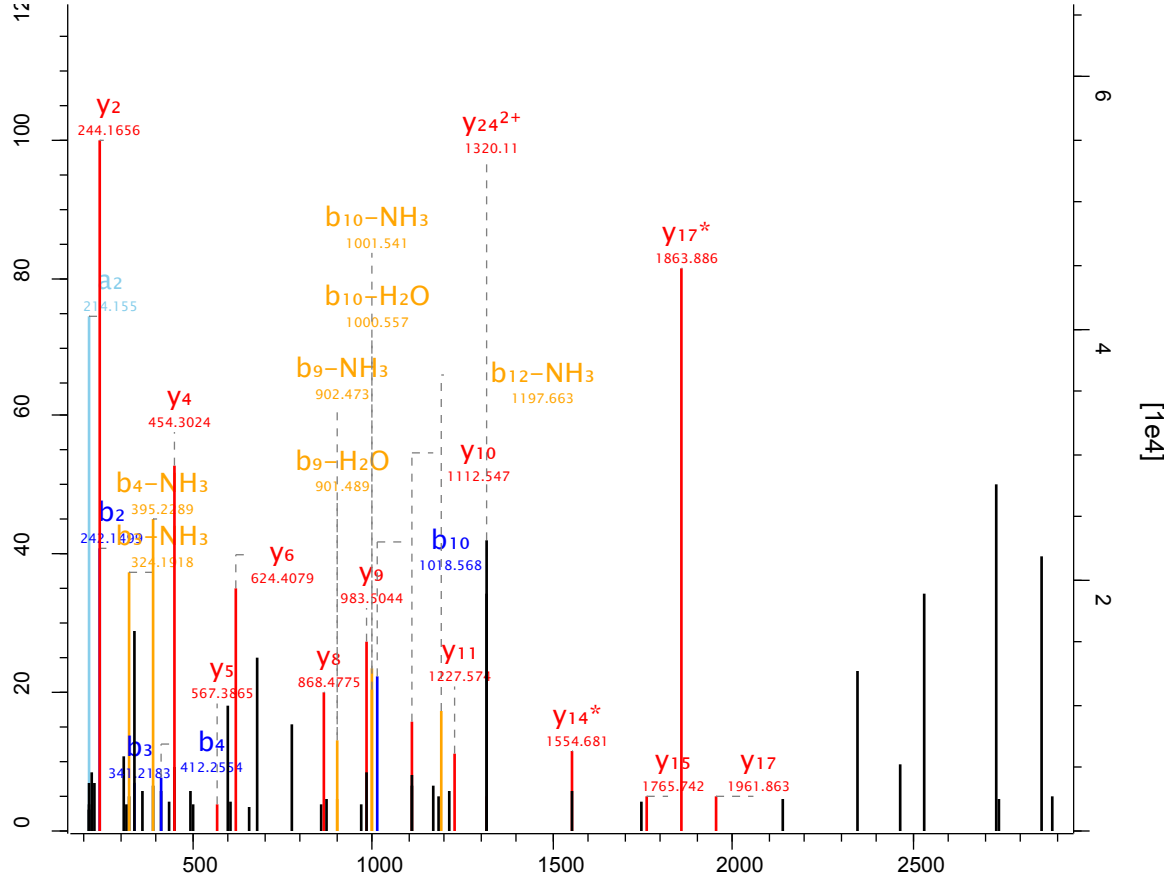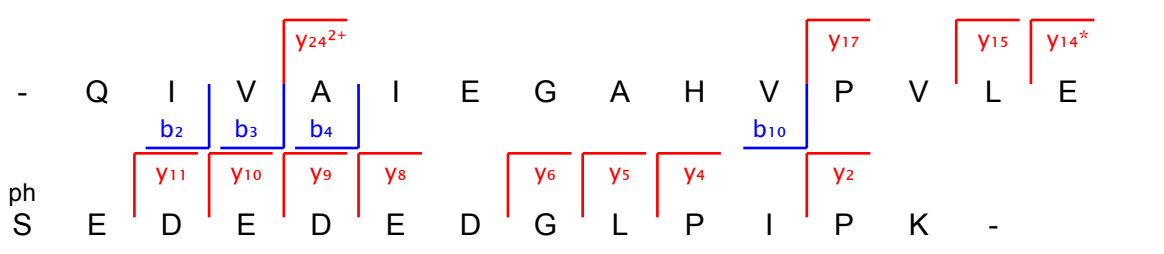

ph S E D E D E D G L P I P K -

2013\_COL15\_34\_38\_151128201608

35986

FTMS; HCD

52.64

957.47

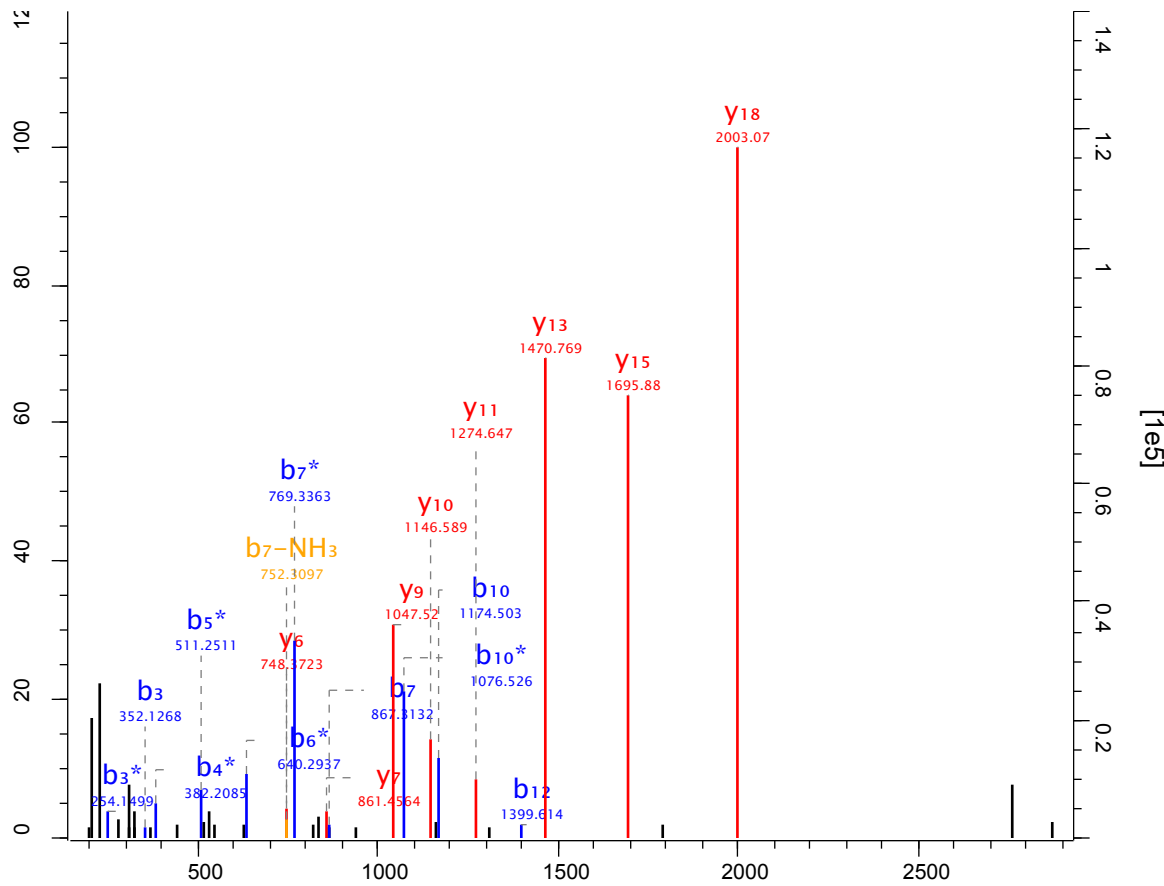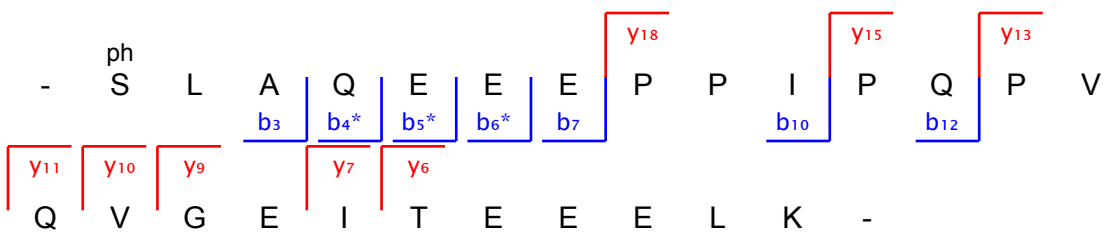

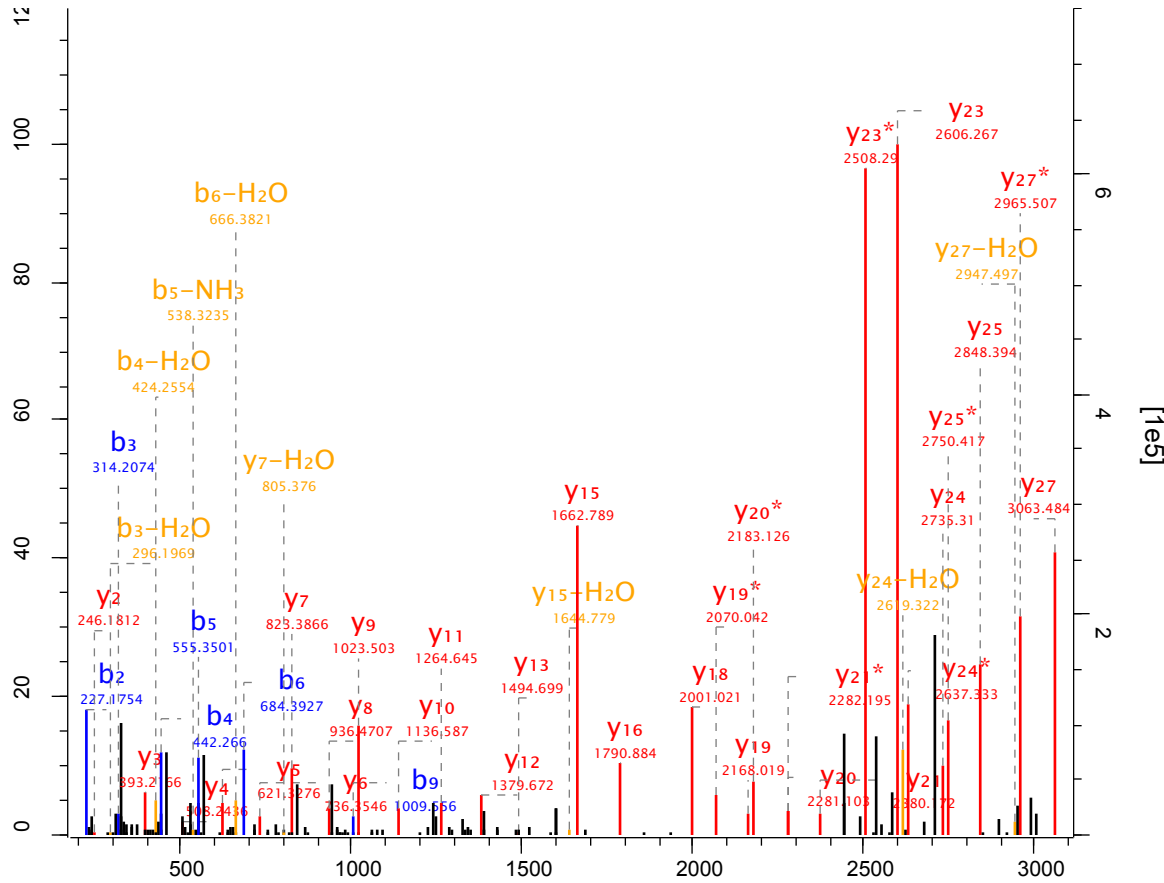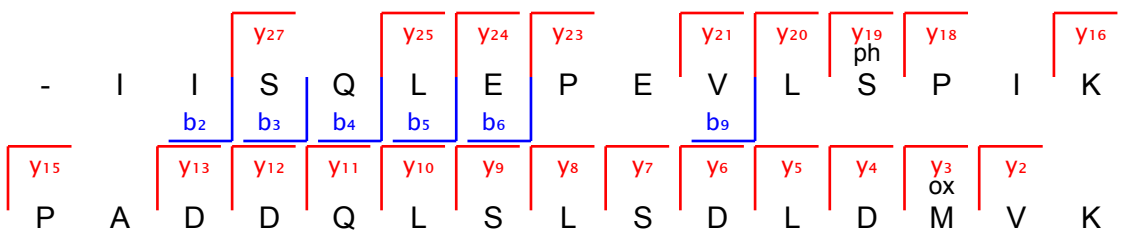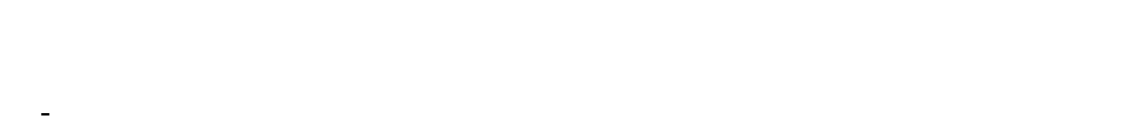

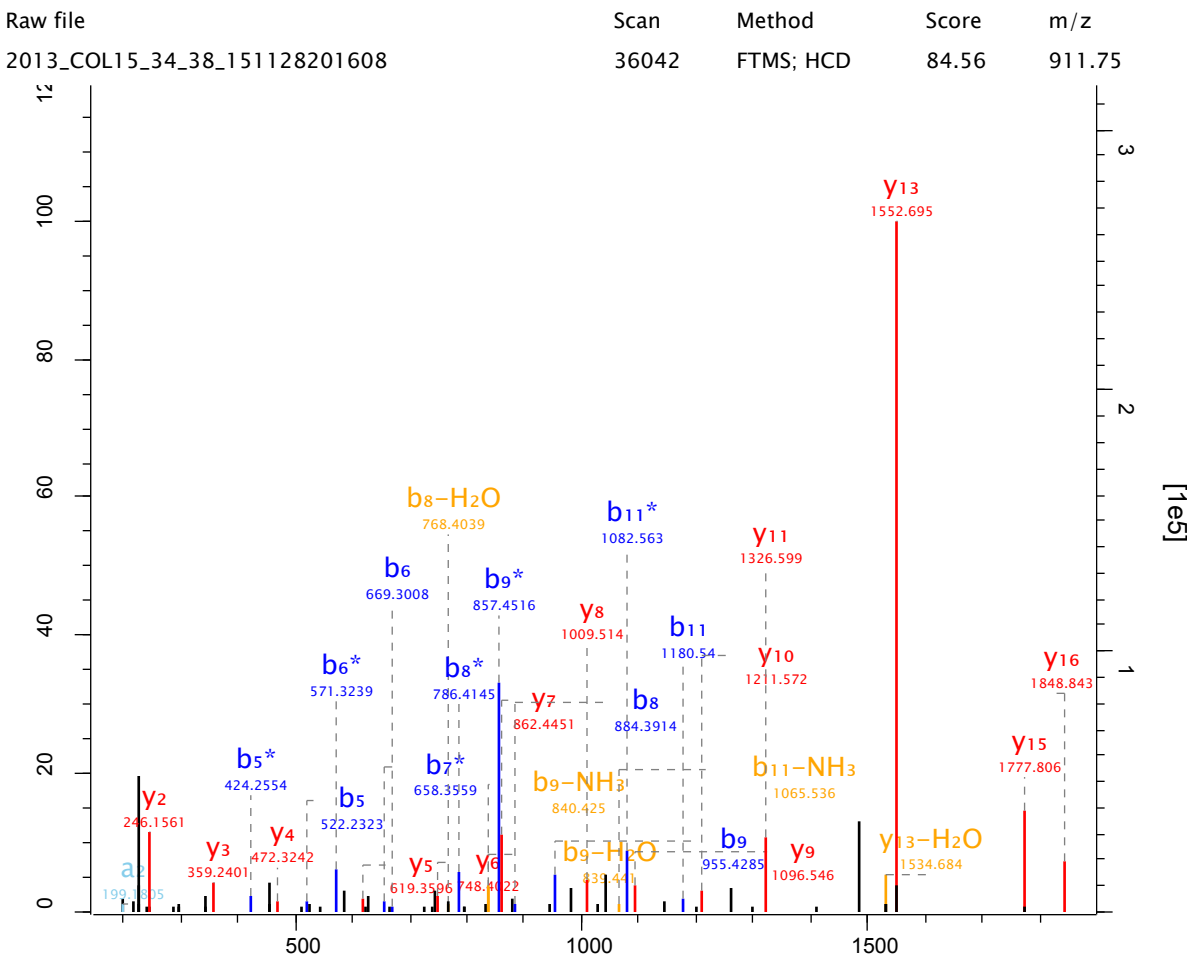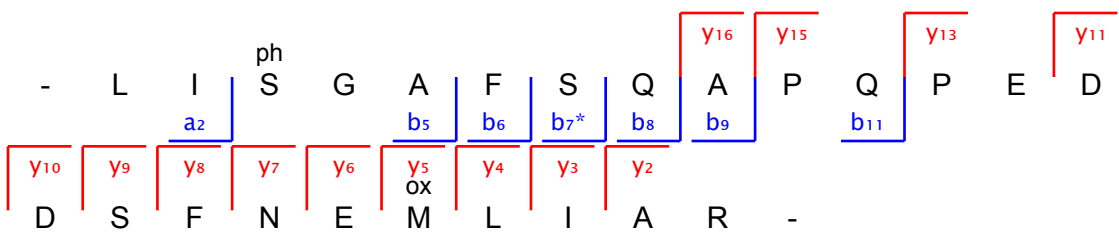

Raw file 2013\_COL15\_34\_38\_151128201608 Scan 36206 Method FTMS; HCD Score 63.7 m/z 718.01

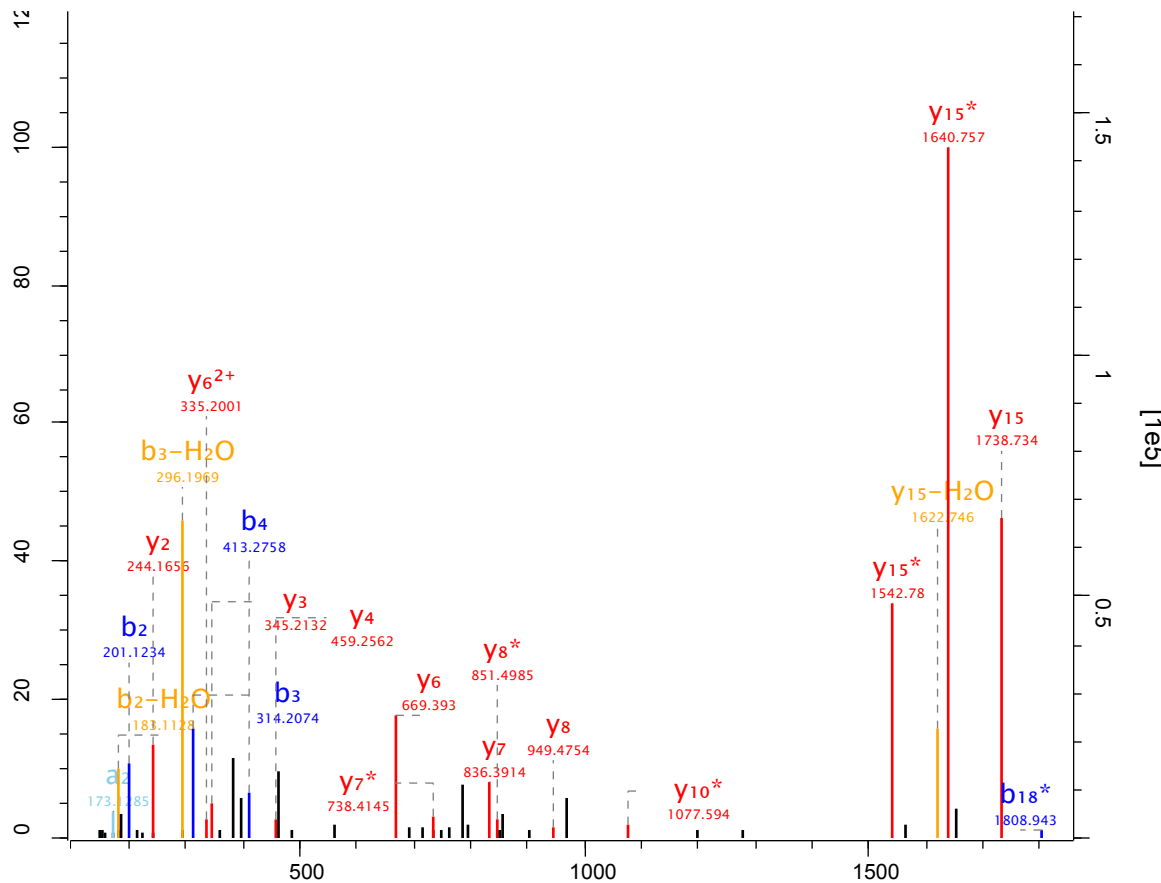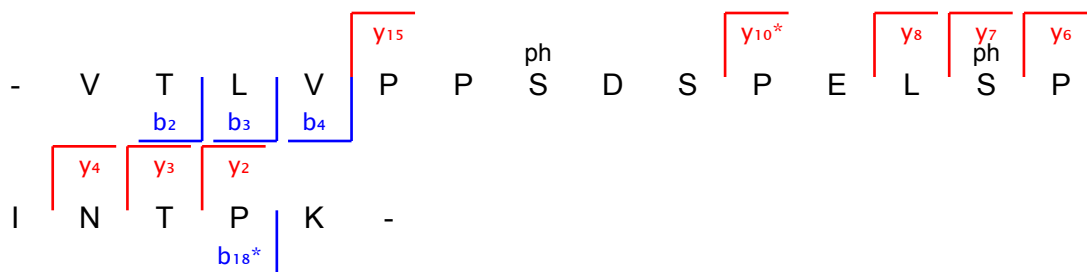

| Raw file                      | Scan | Method    | Score | m/z    |
|-------------------------------|------|-----------|-------|--------|
| 2013_COL15_34_38_151128201608 | 3636 | FTMS; HCD | 40.99 | 405.83 |

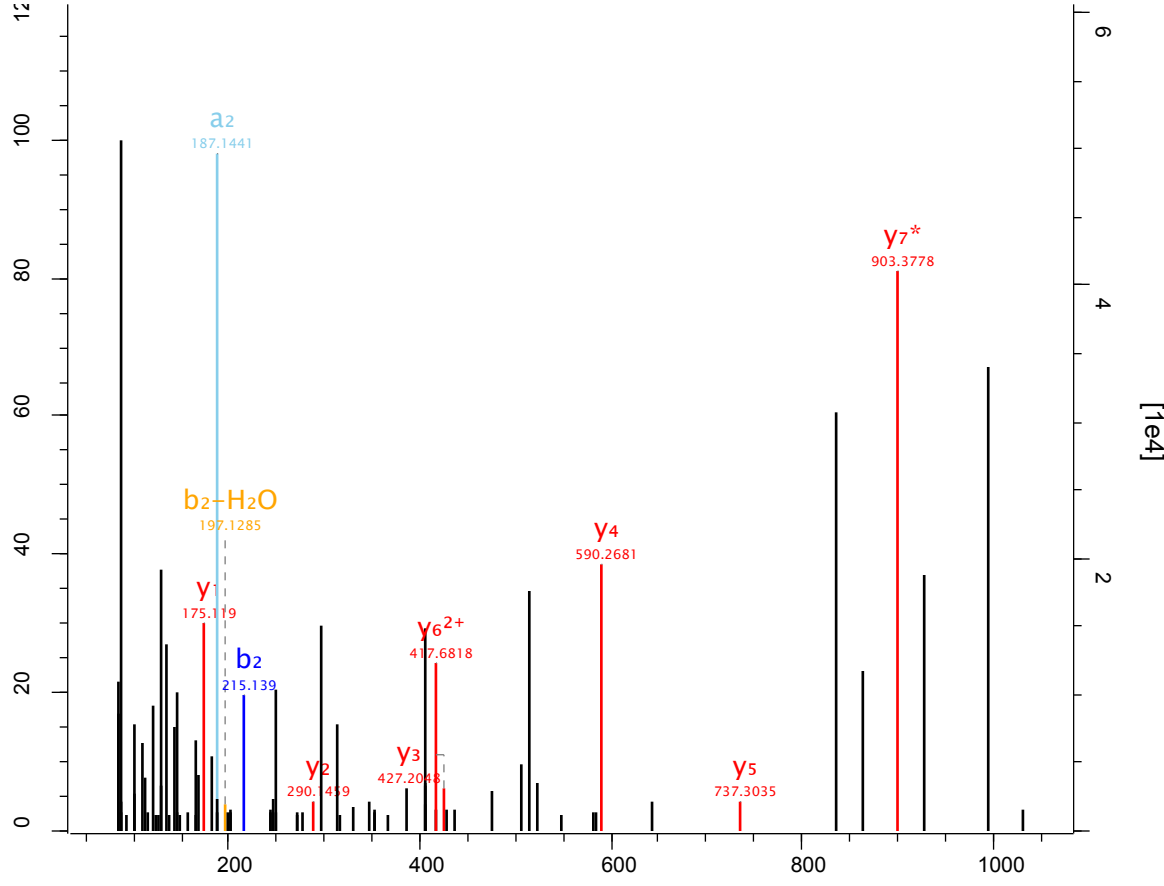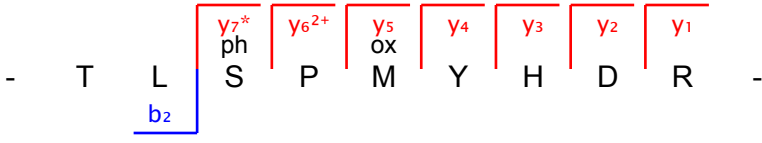



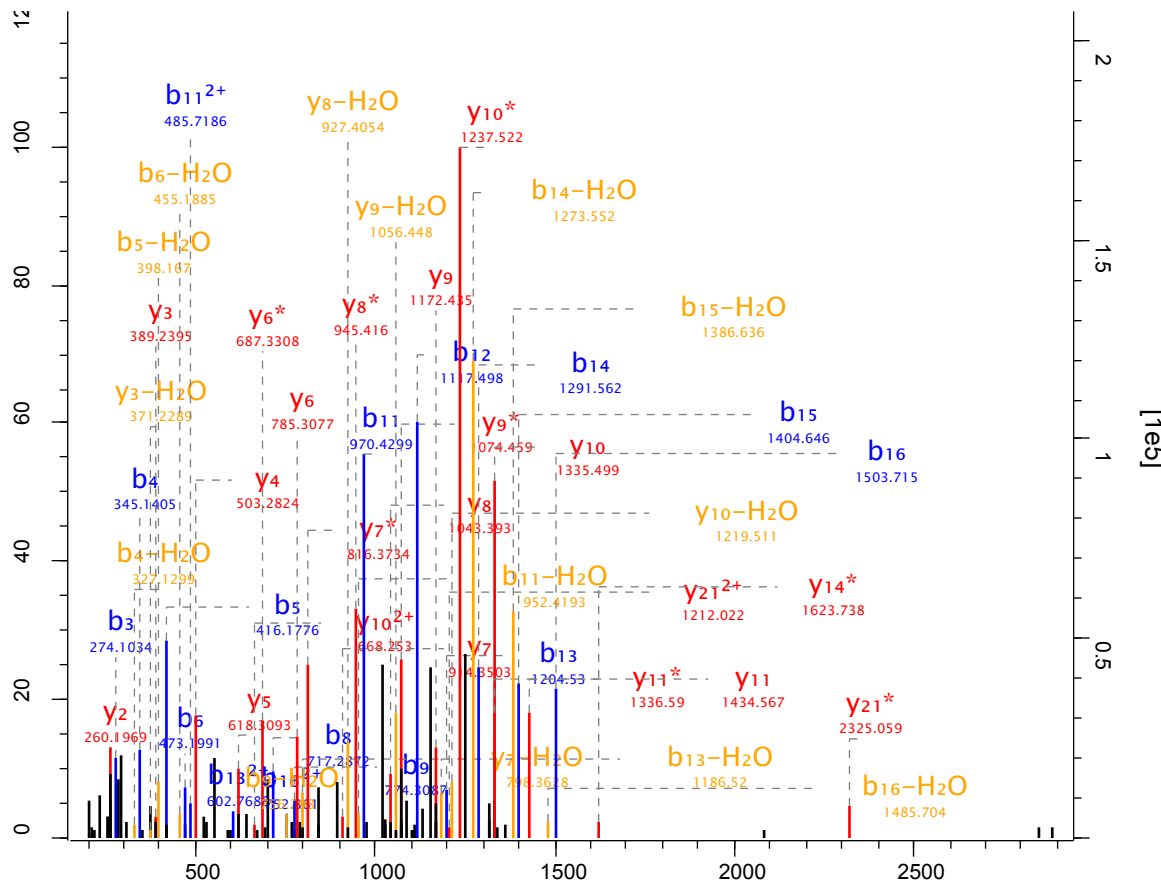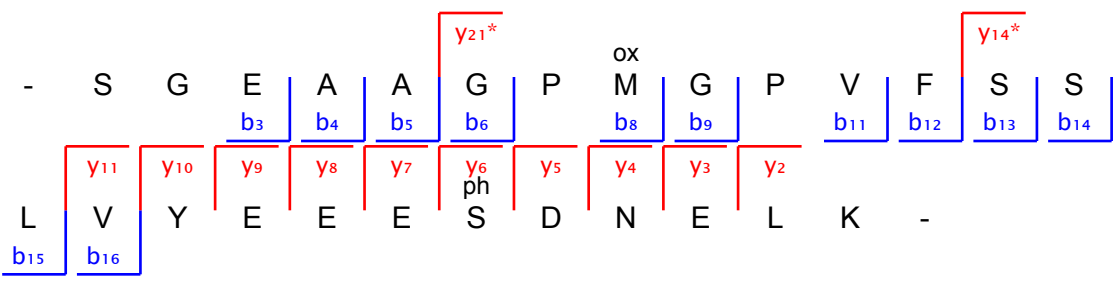

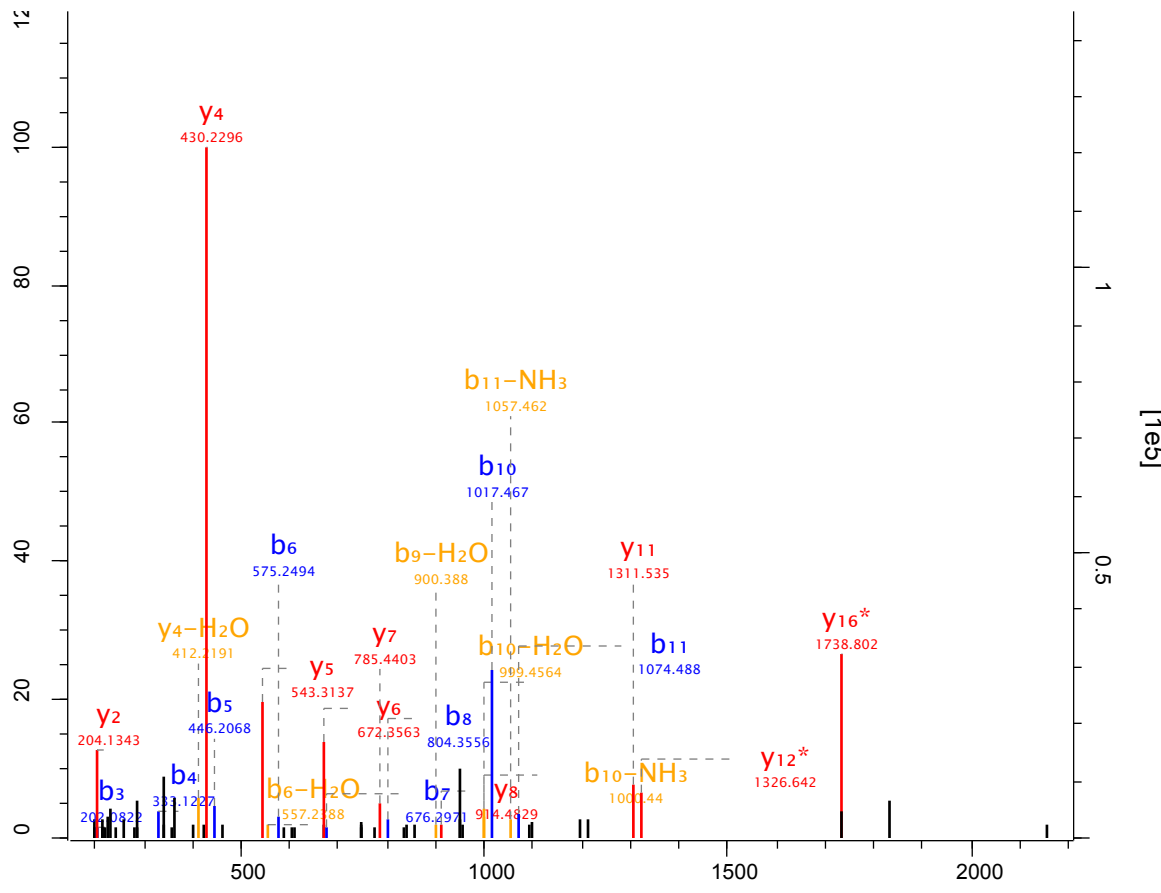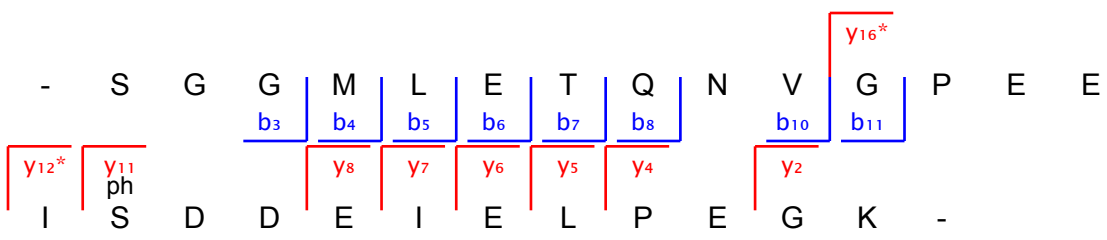

| Raw file                      | Scan  | Method    | Score | m/z     |
|-------------------------------|-------|-----------|-------|---------|
| 2013_COL15_34_38_151128201608 | 37979 | FTMS; HCD | 70.11 | 1092.23 |

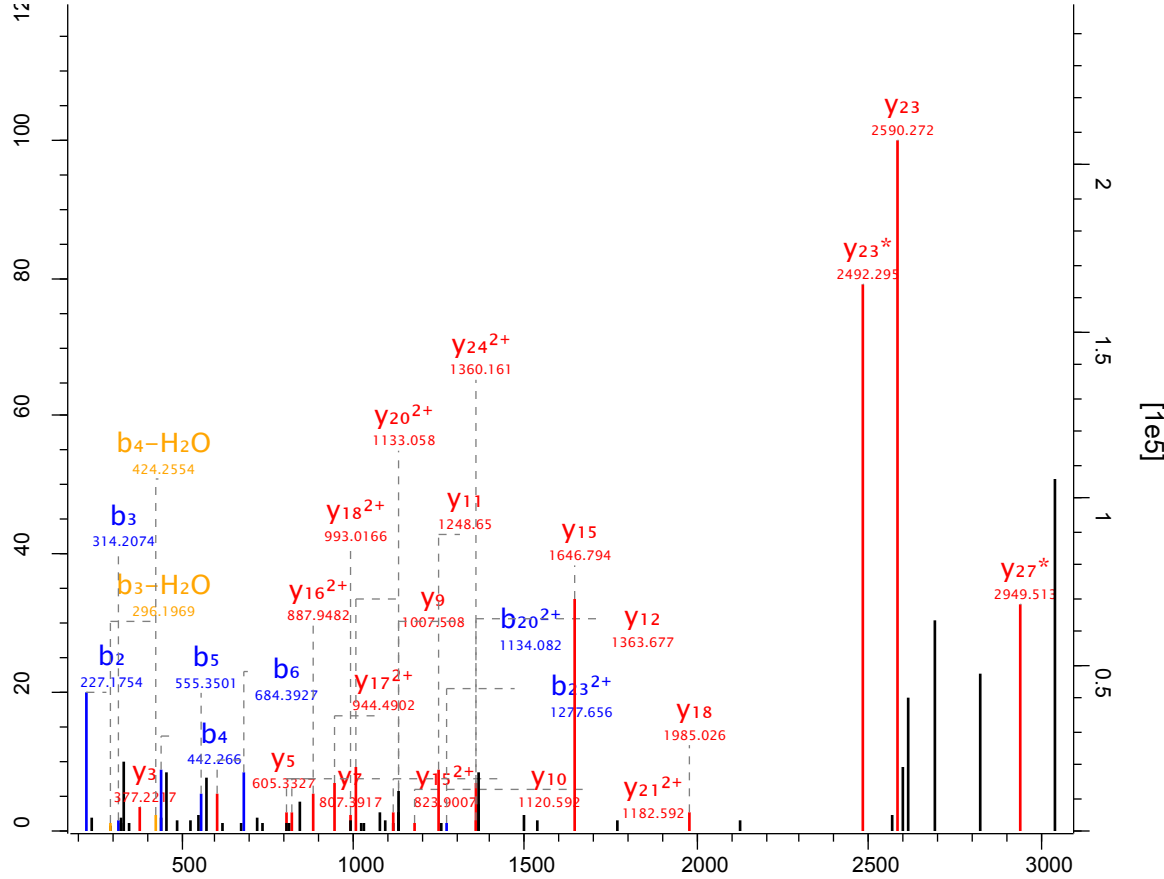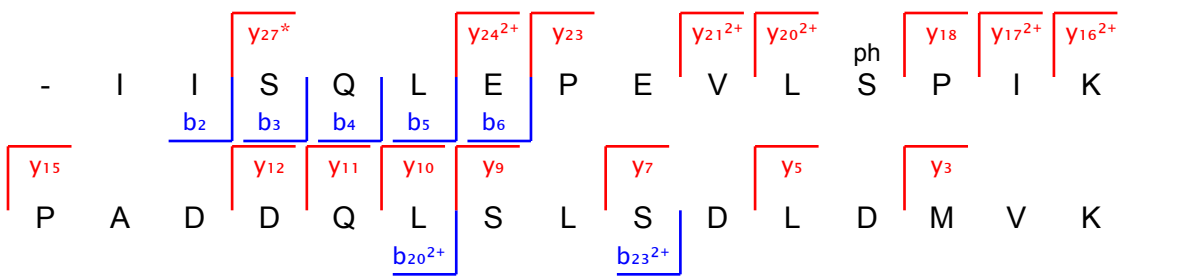

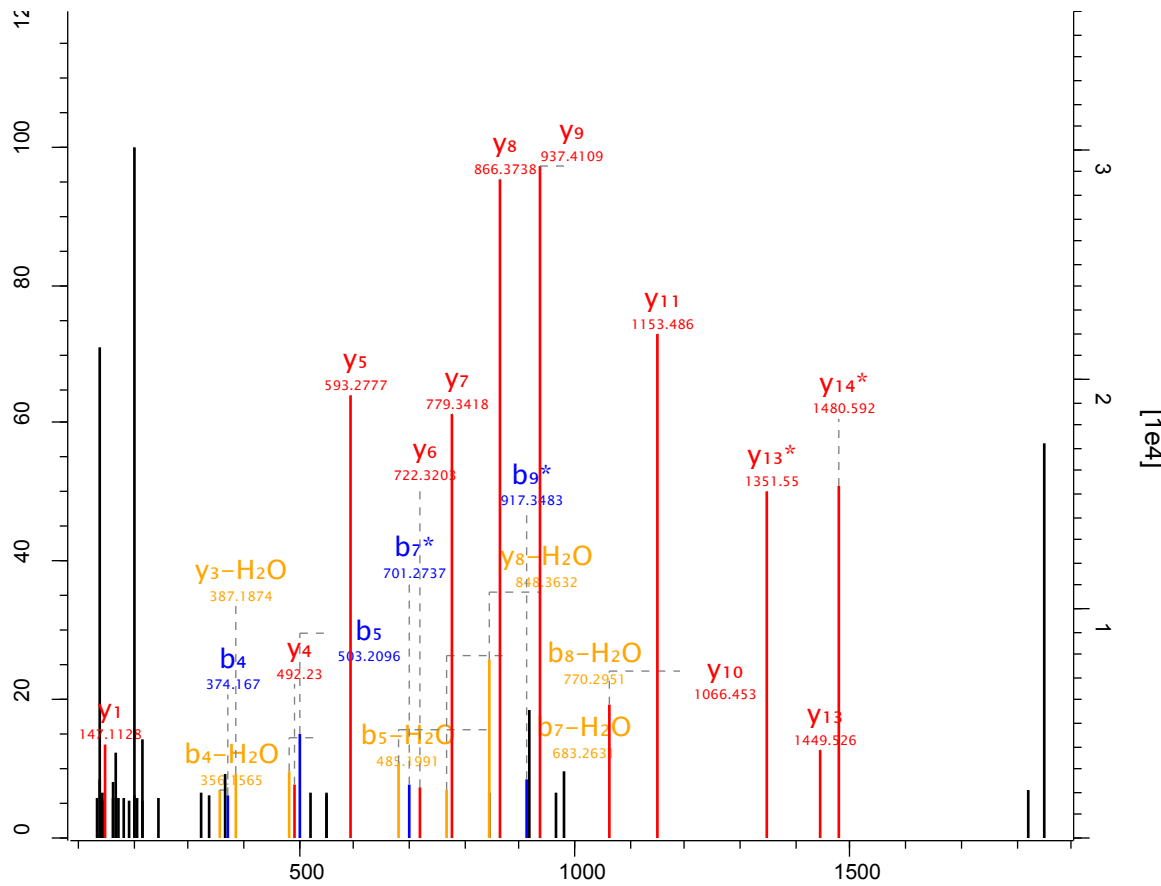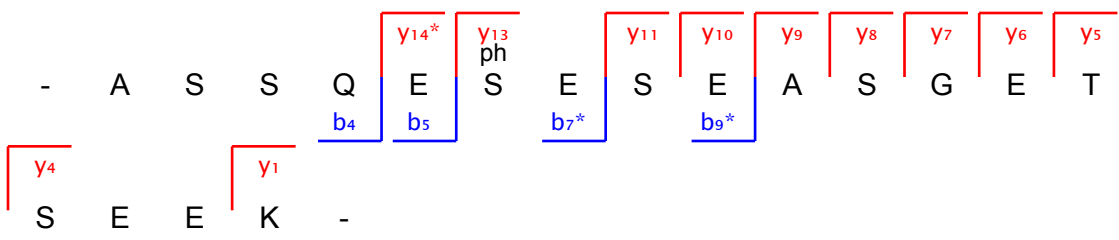

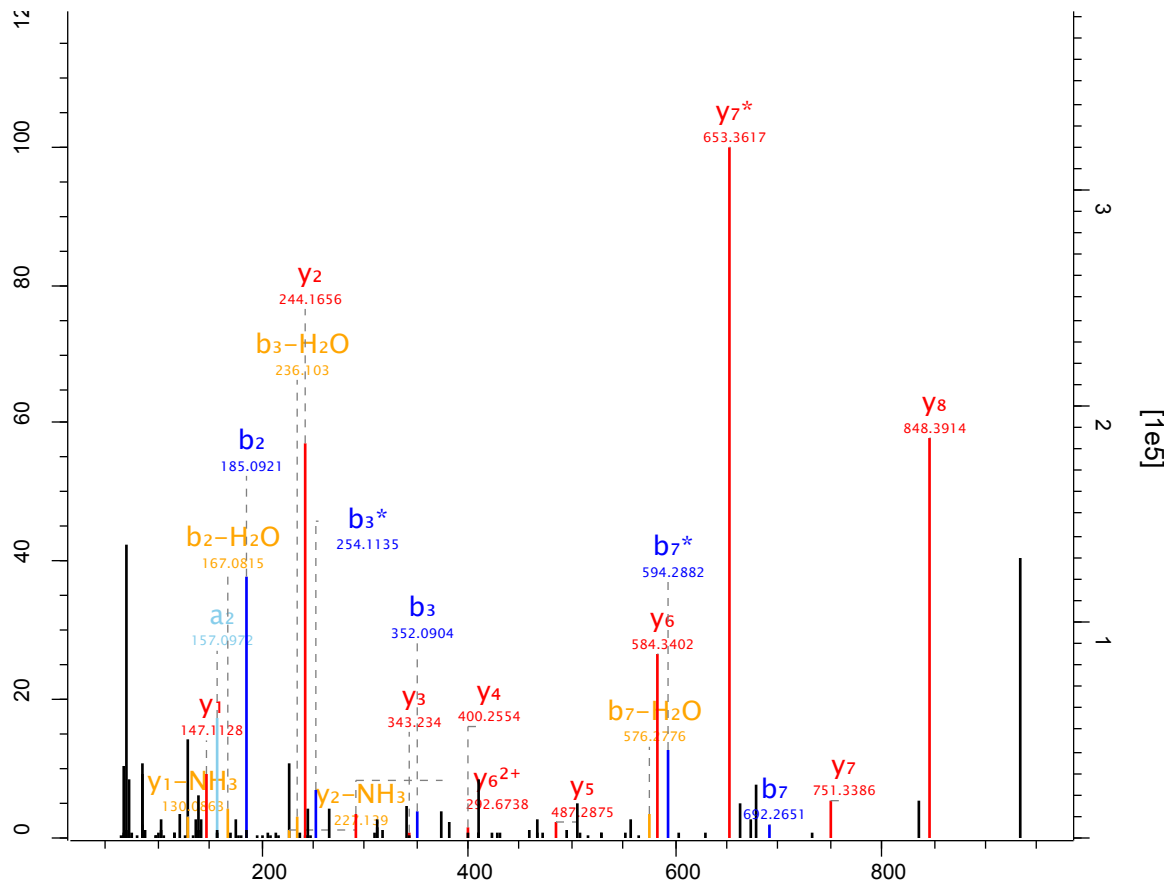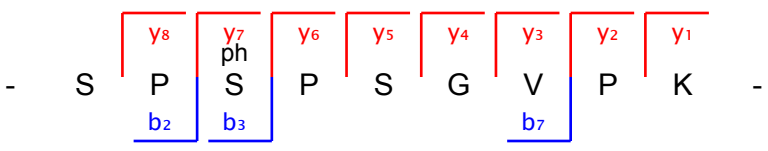

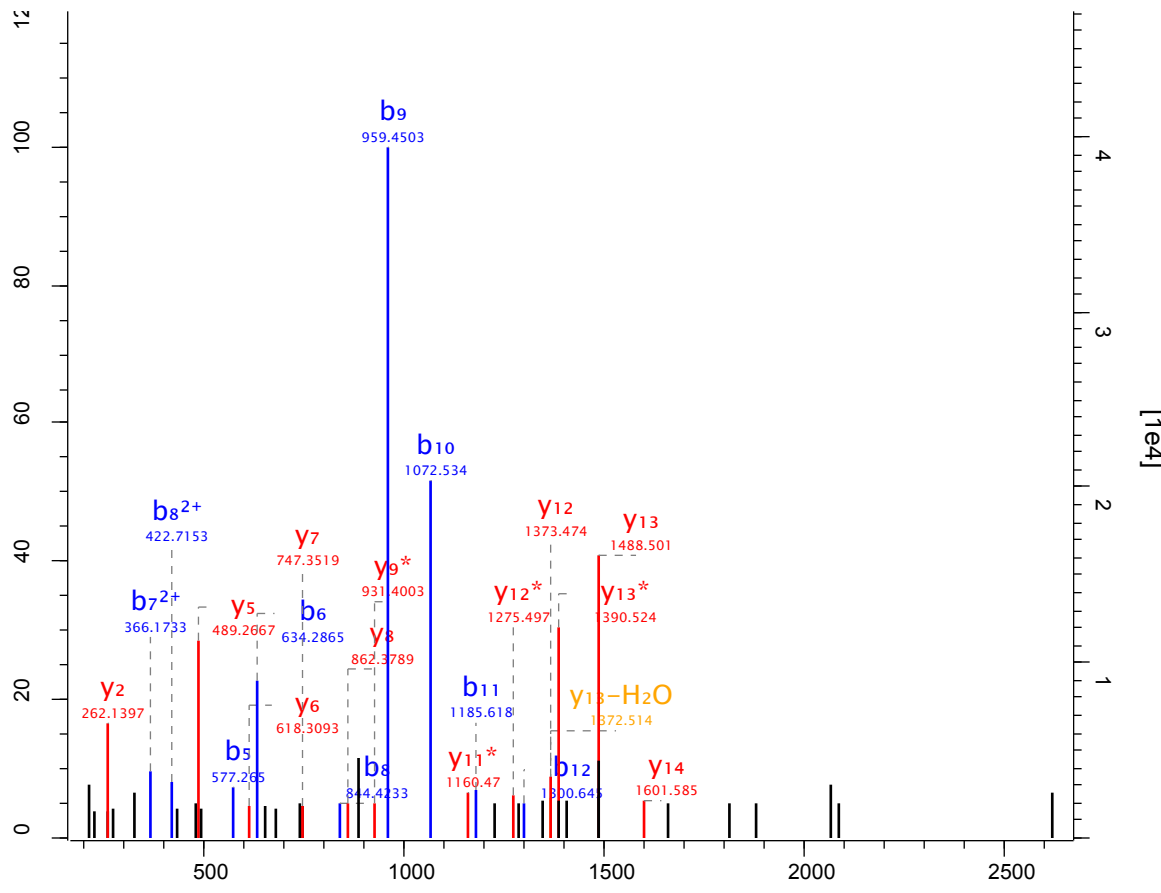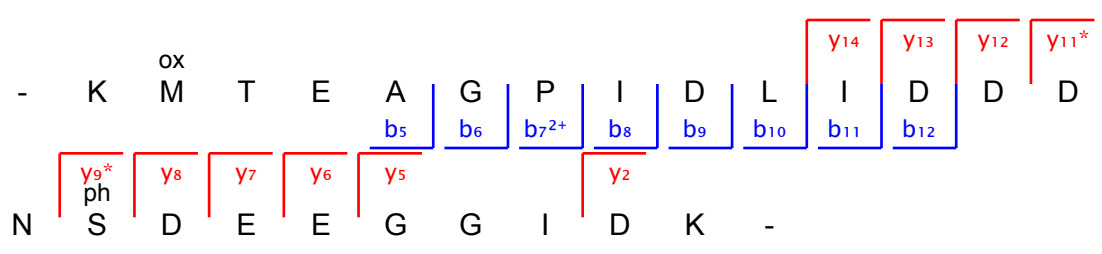

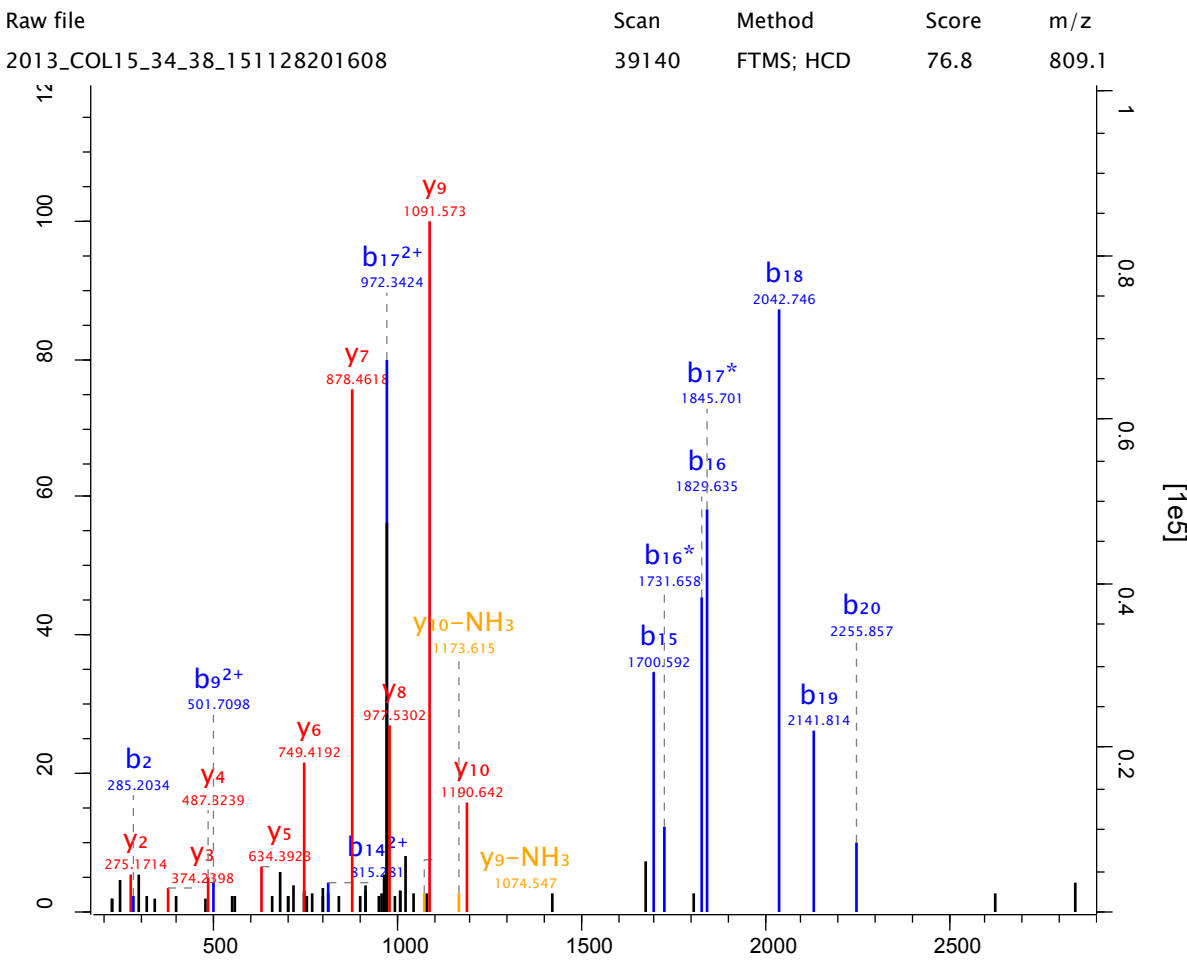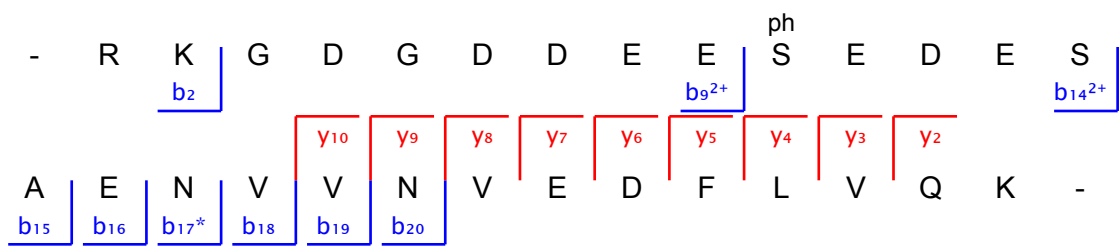

2013\_COL15\_34\_38\_151128201608

3920

FTMS; HCD

93.23

528.91

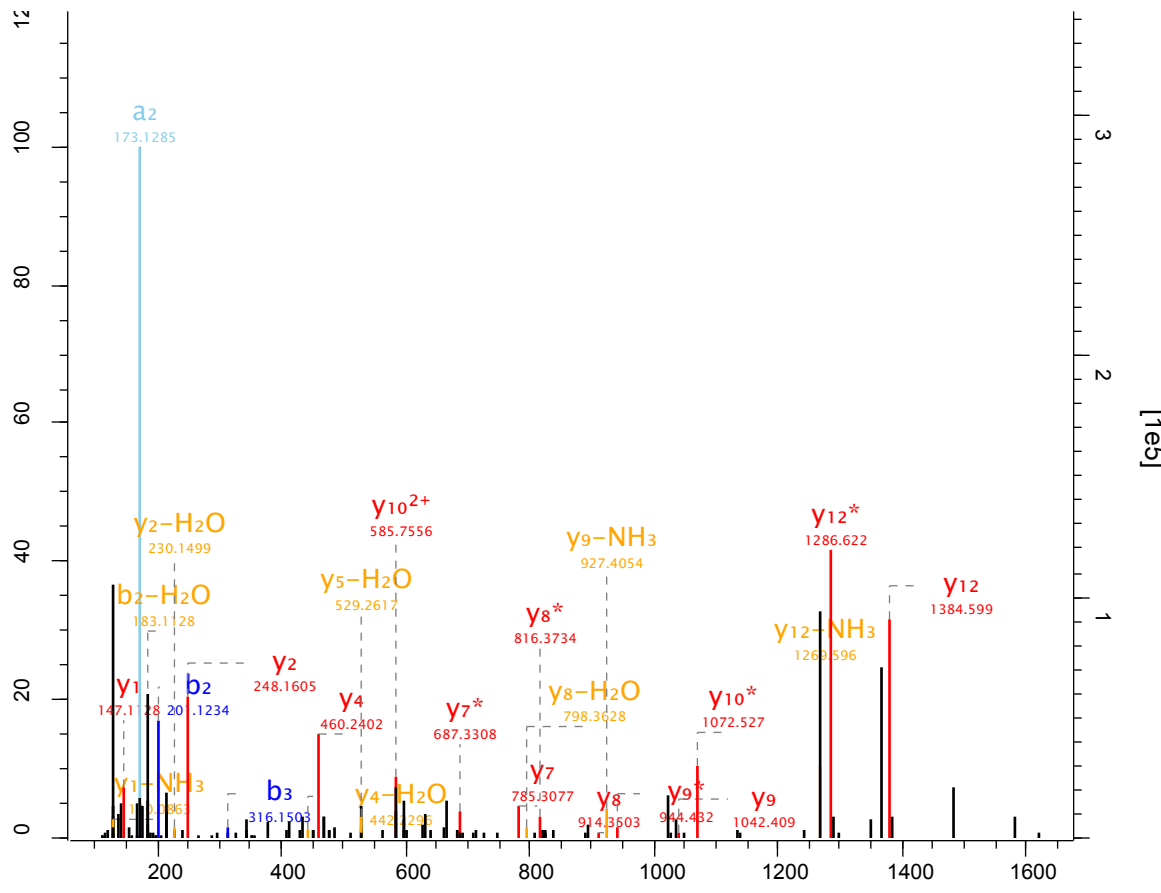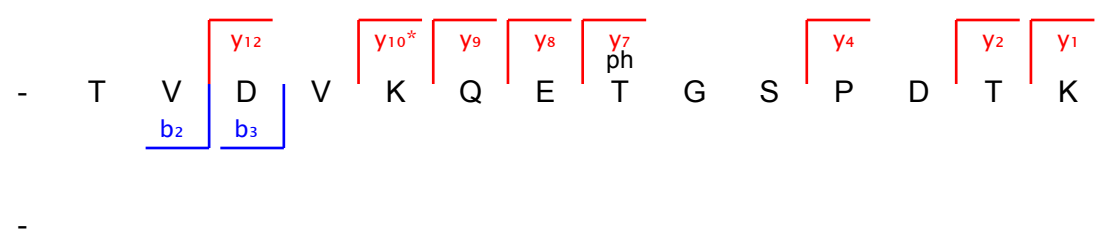



2013\_COL15\_34\_38\_151128201608

39234

FTMS; HCD

171.99

984.15

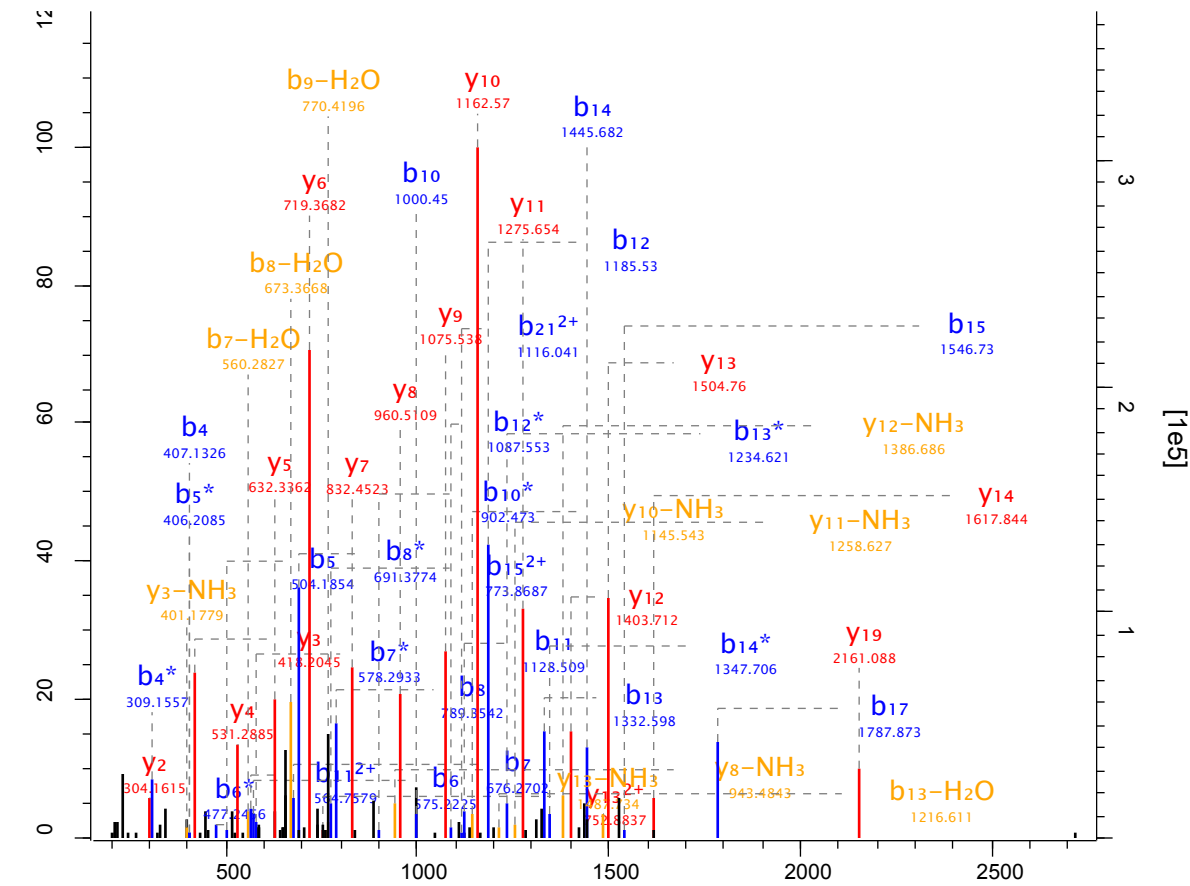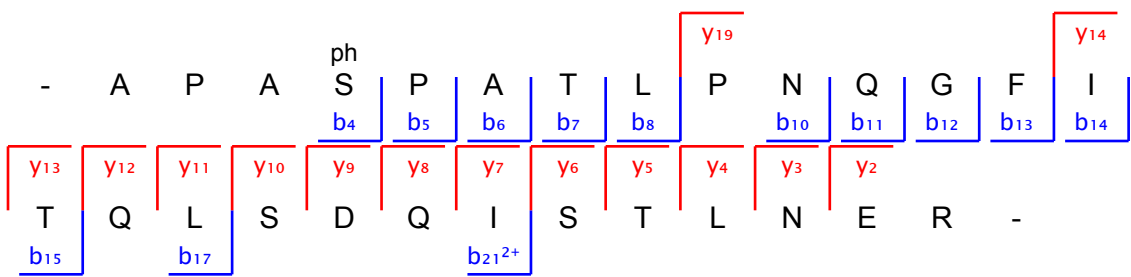

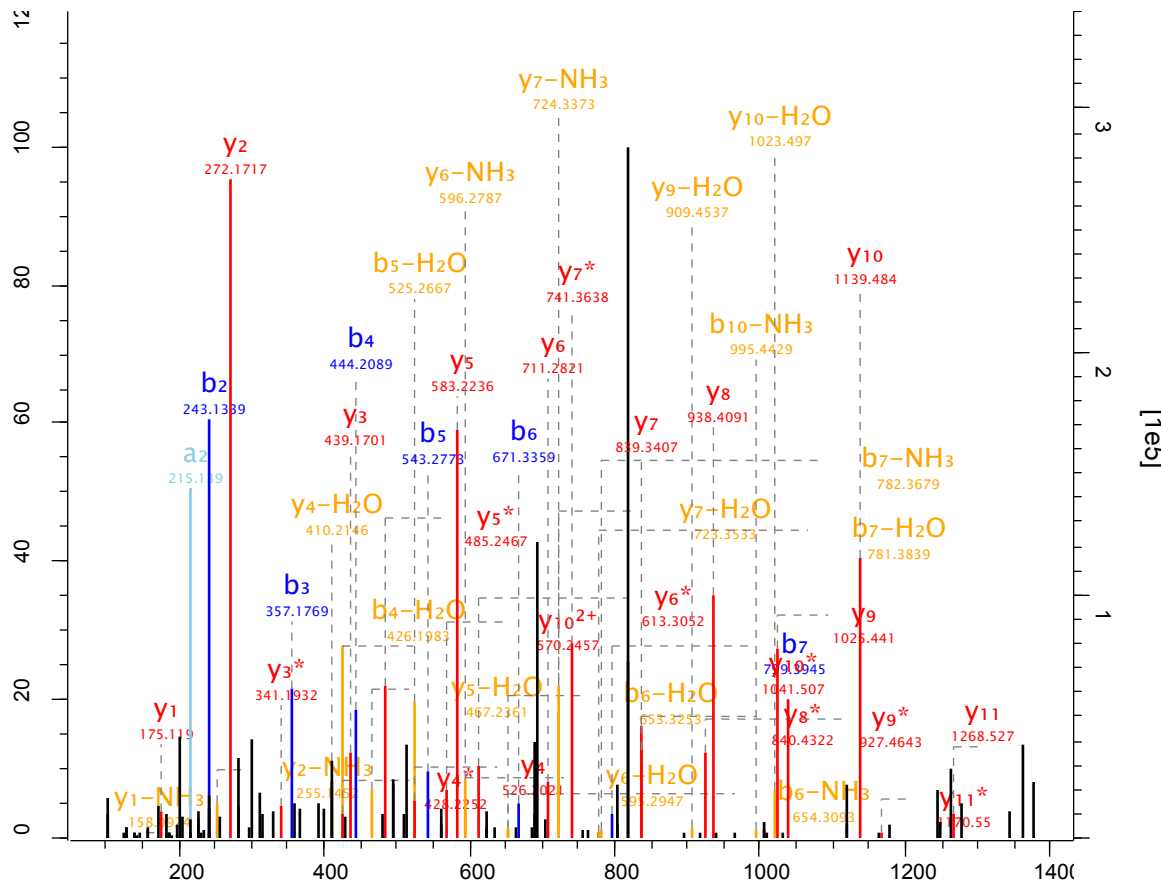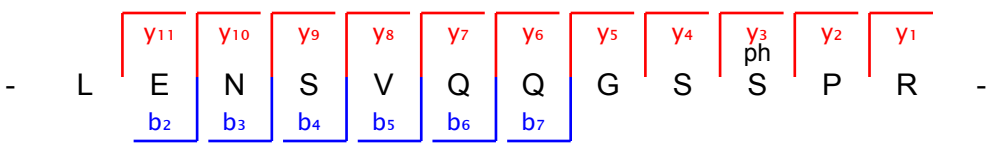

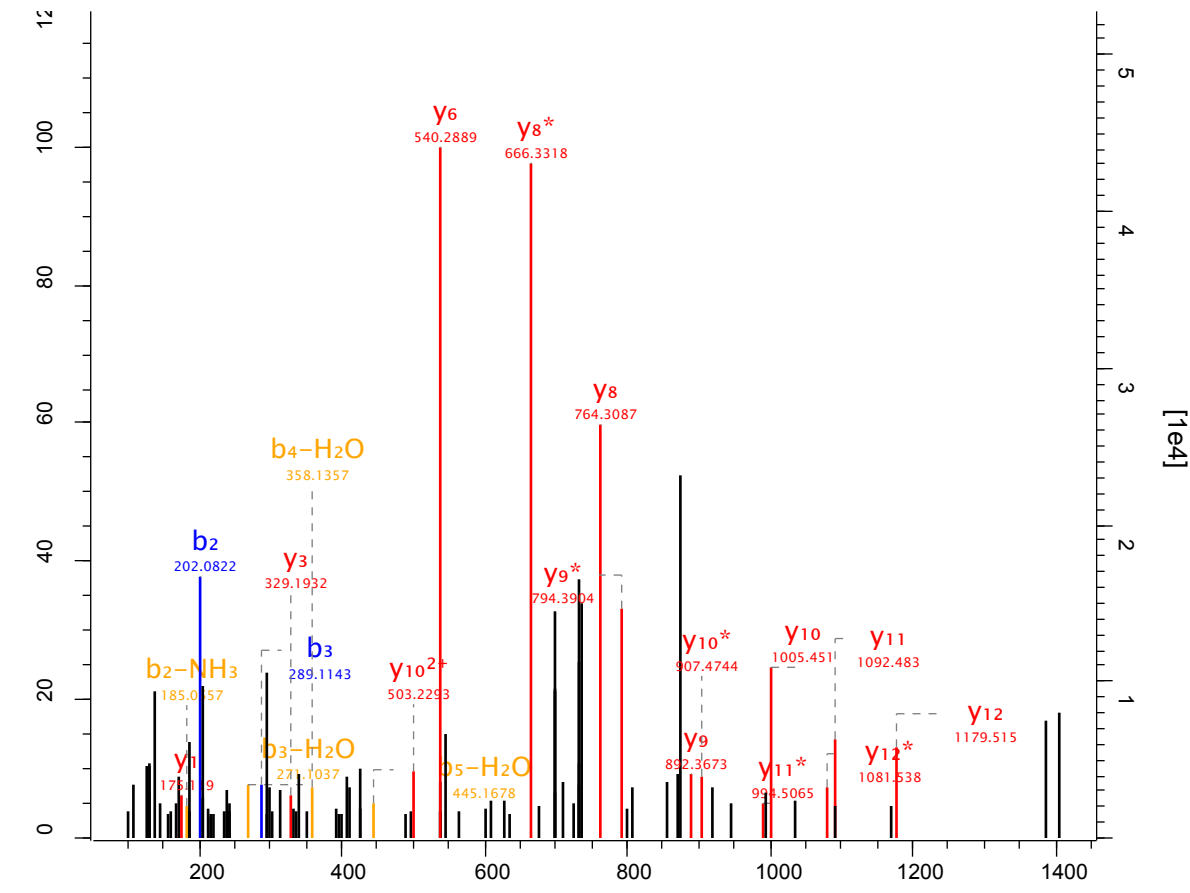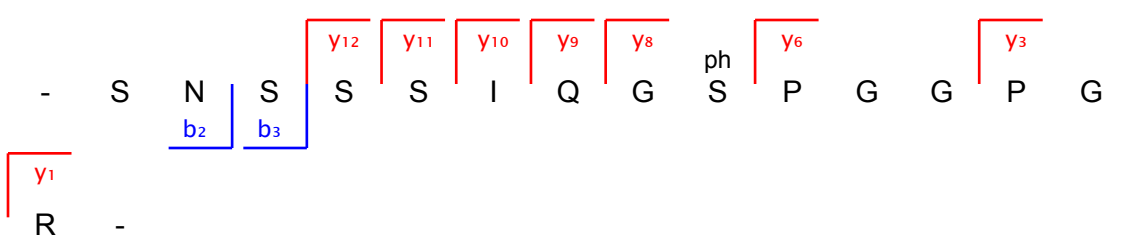



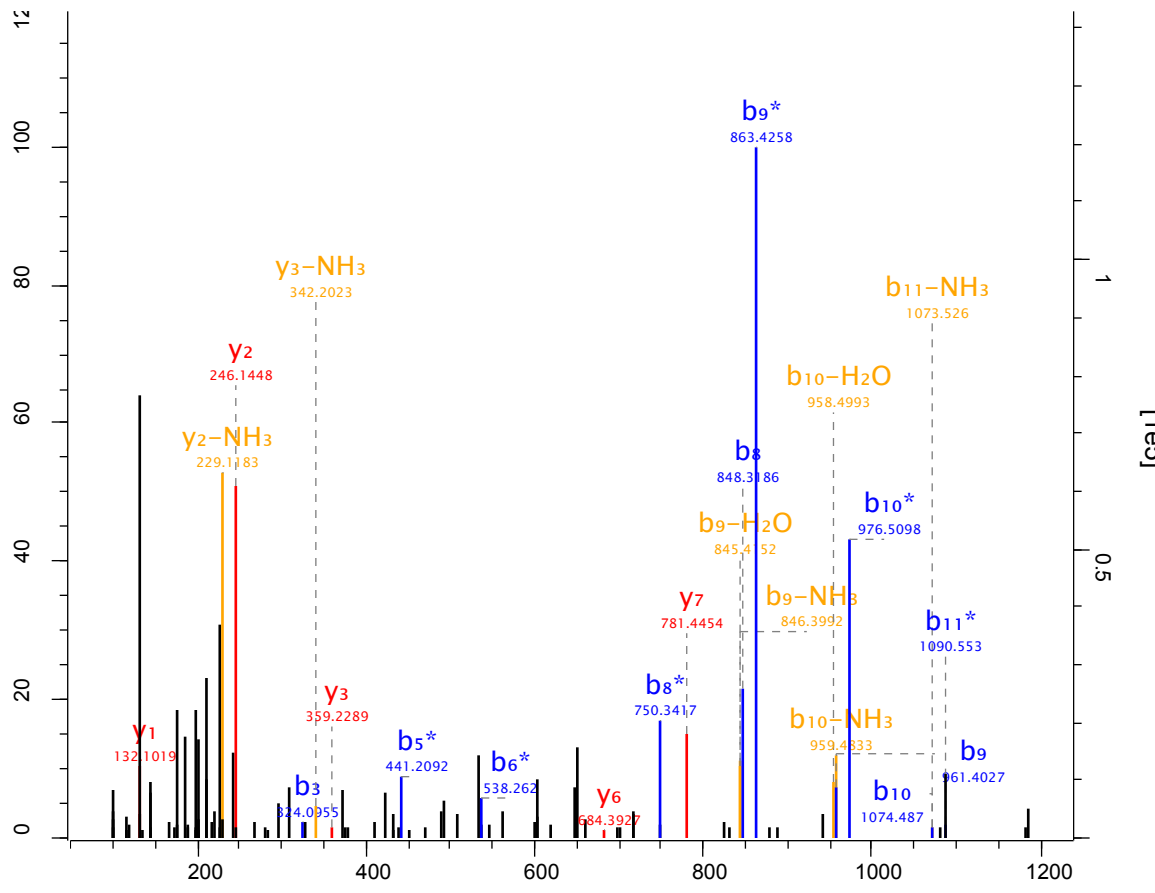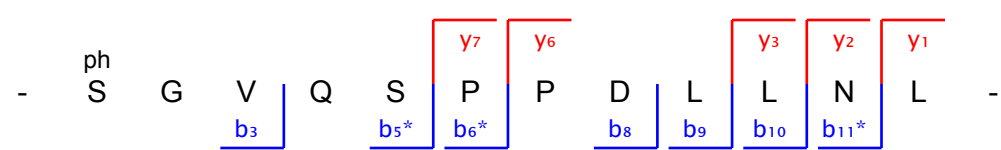

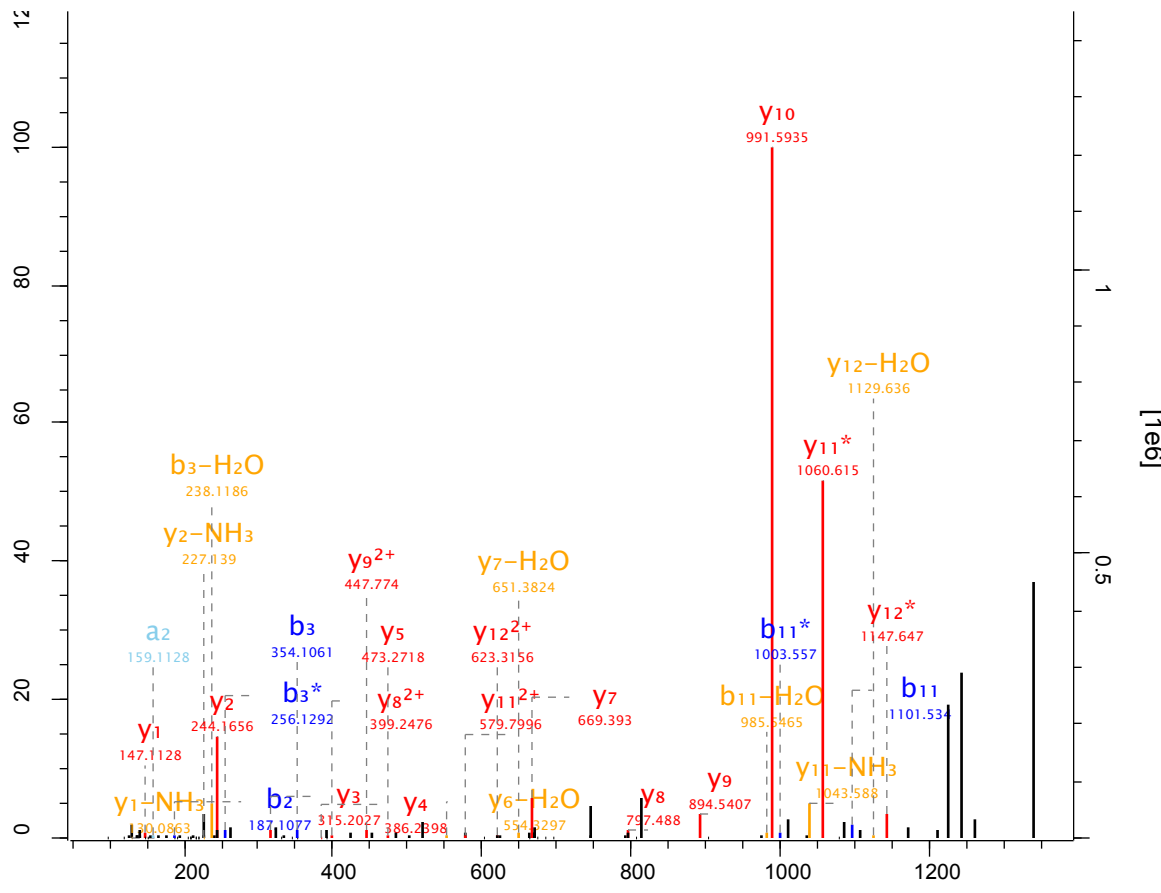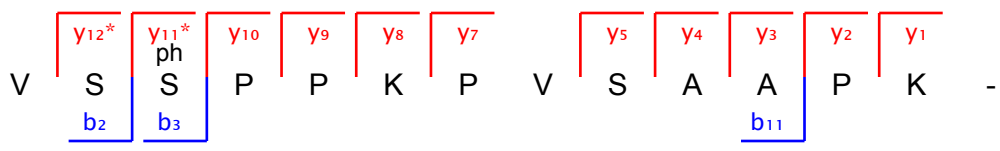

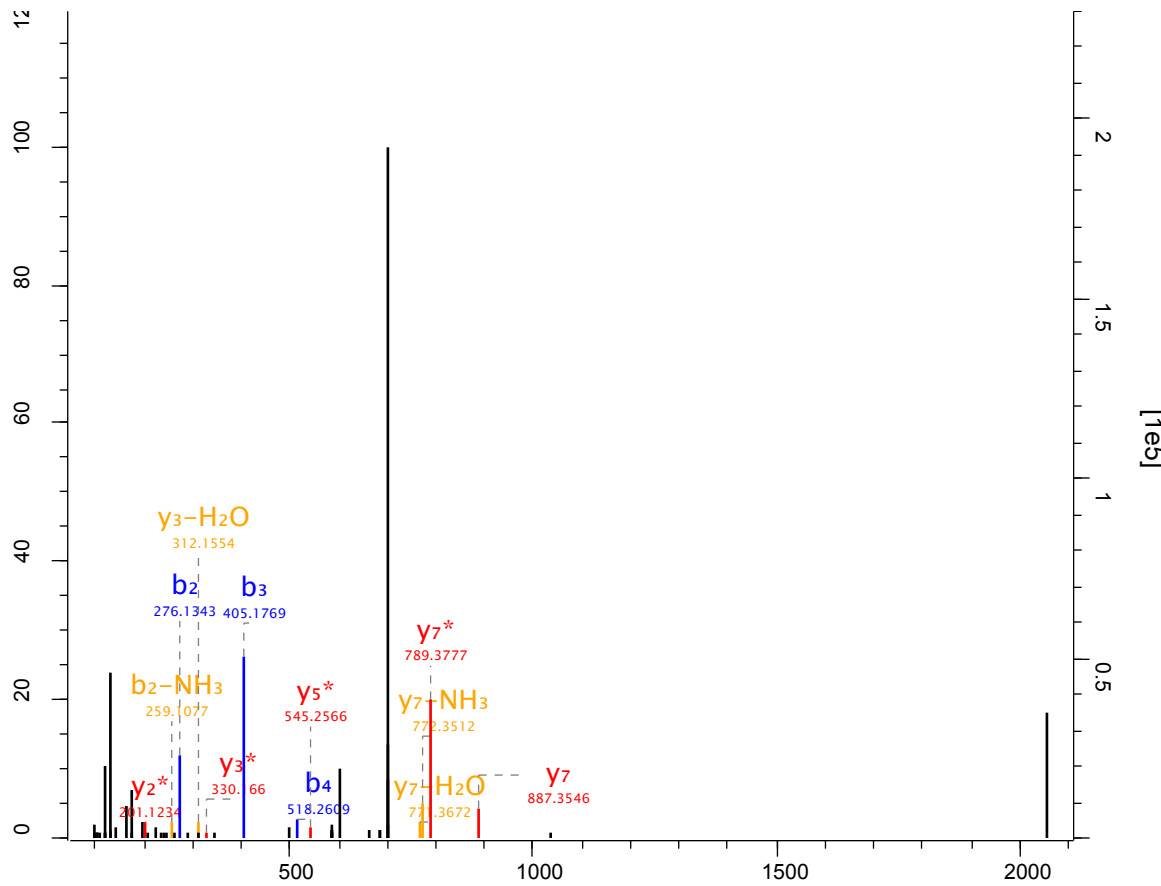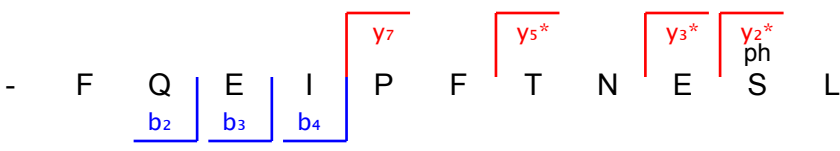

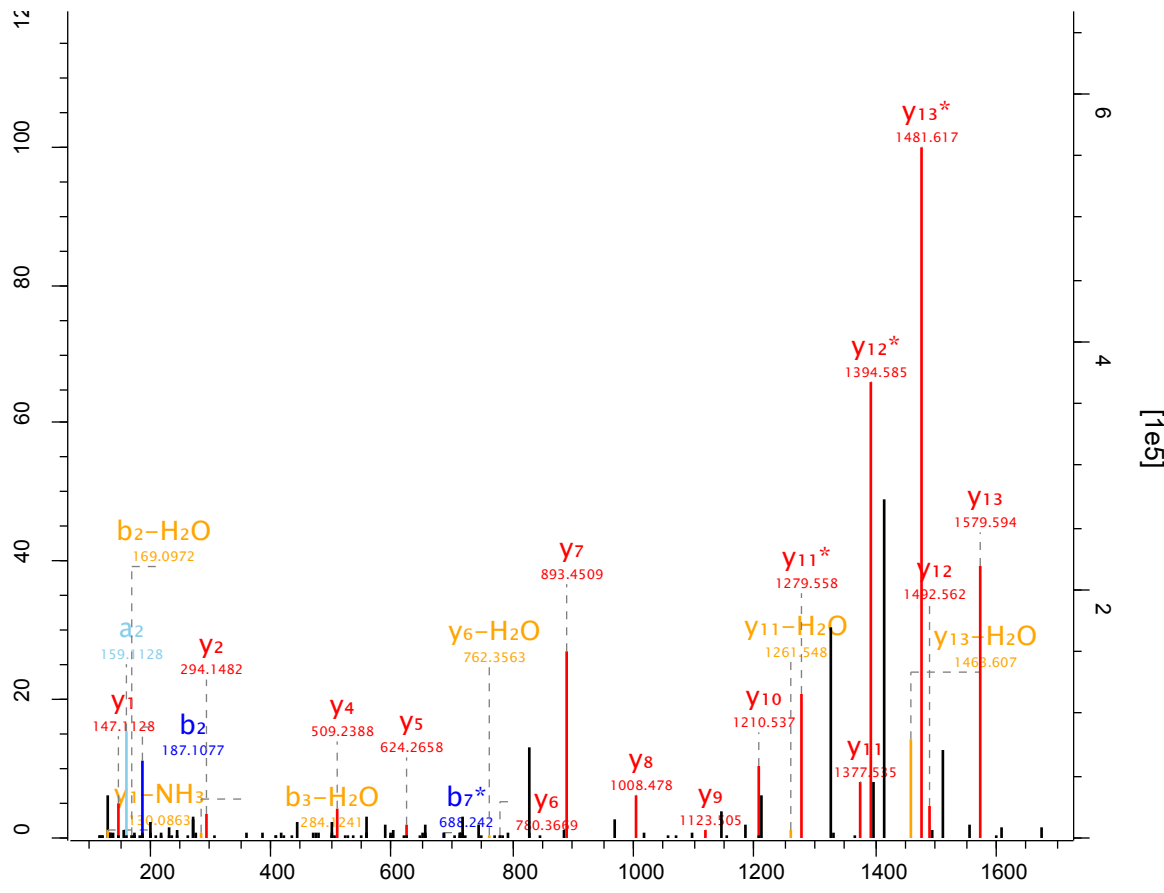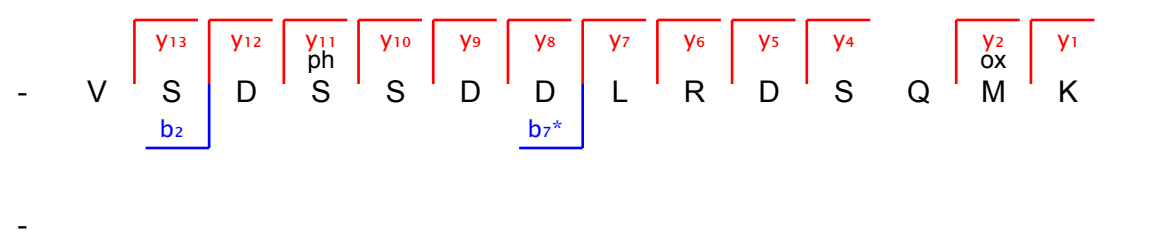



2013\_COL15\_34\_38\_151128201608

4155

FTMS; HCD

132.84

744.87

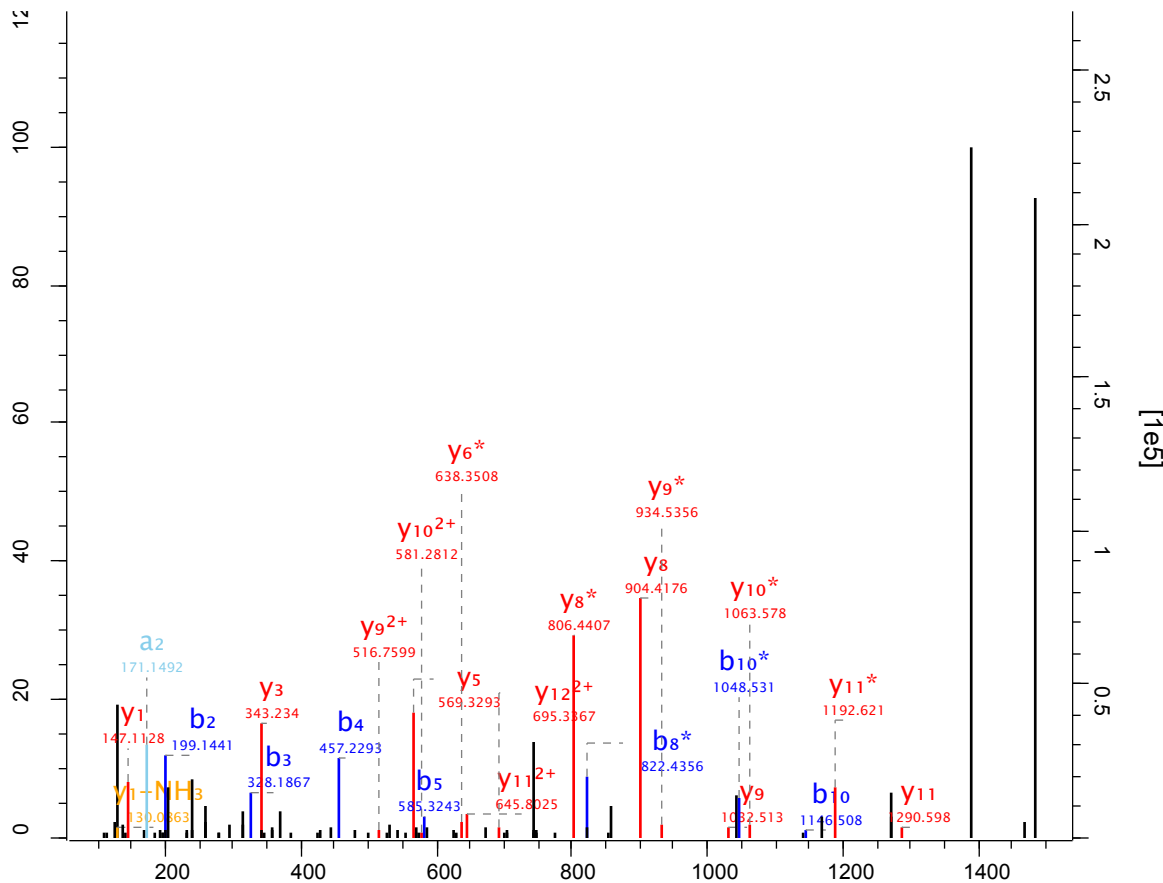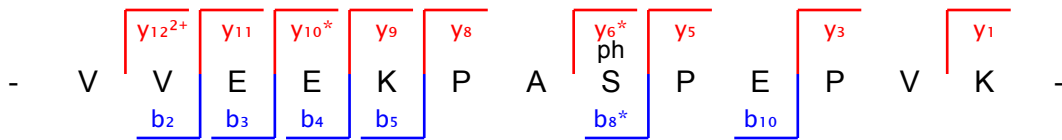

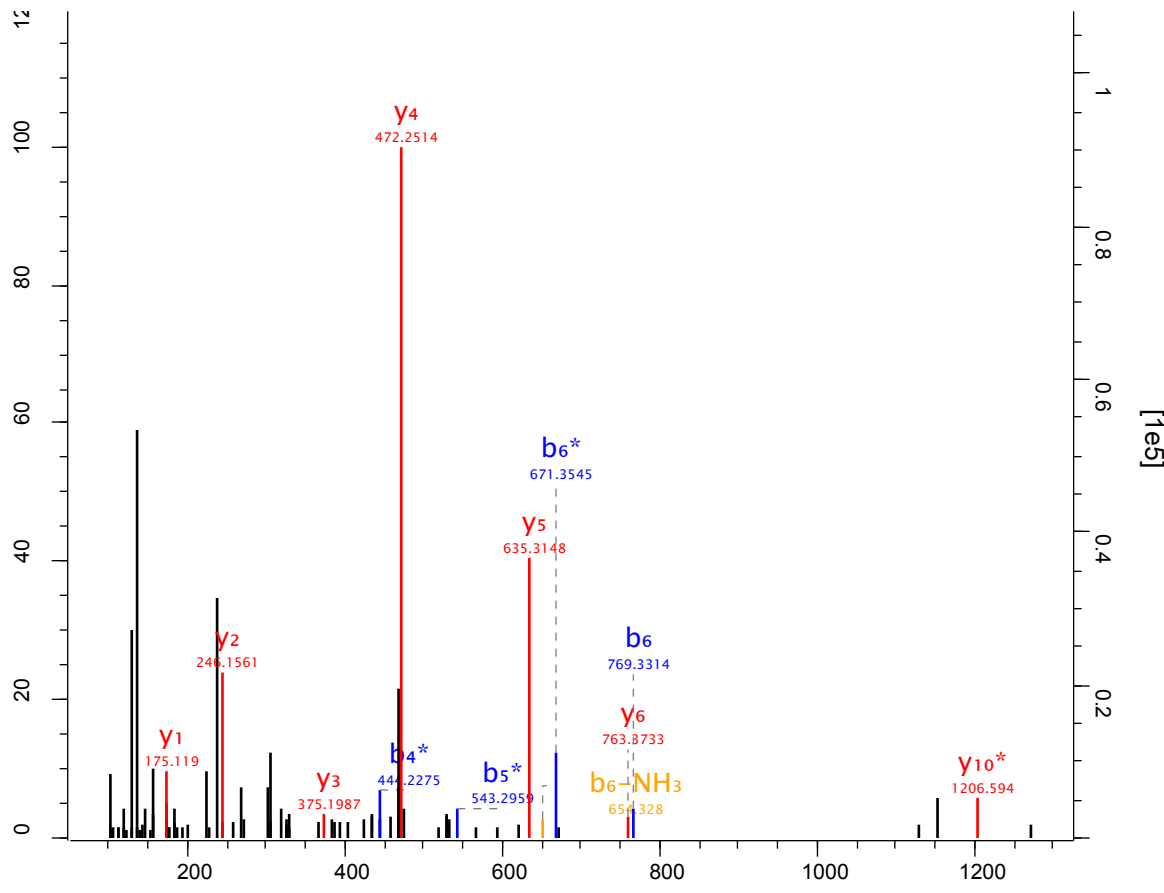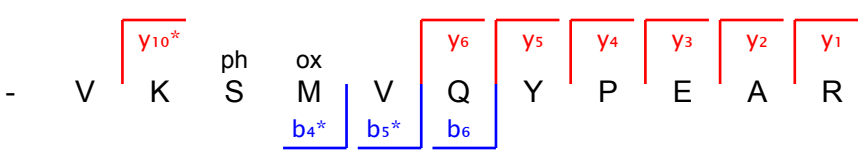

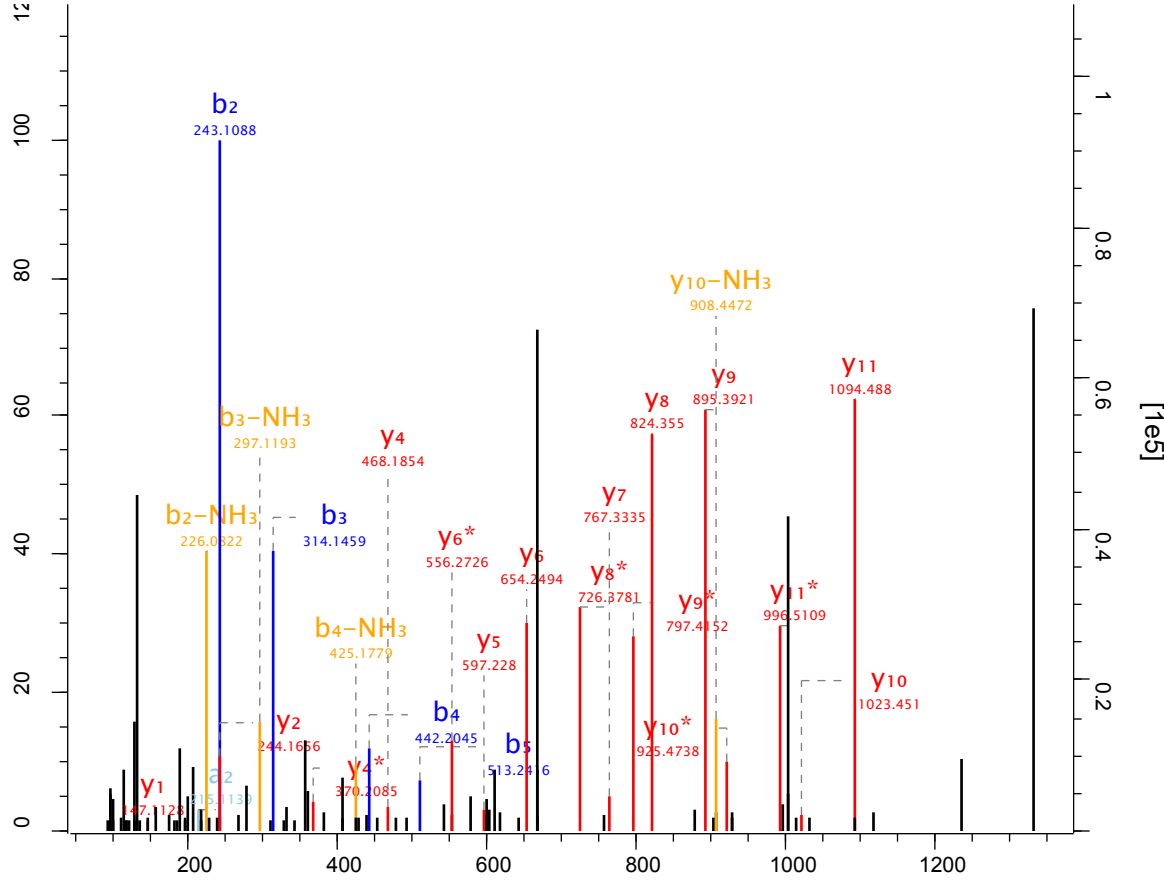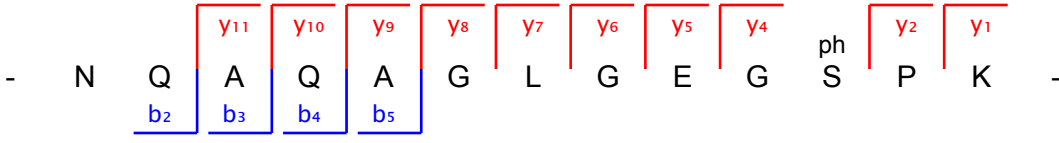

Raw file  
2013\_COL15\_34\_38\_151128201608

Scan 4276  
Method FTMS; HCD

Score 47.77  
m/z 644.29

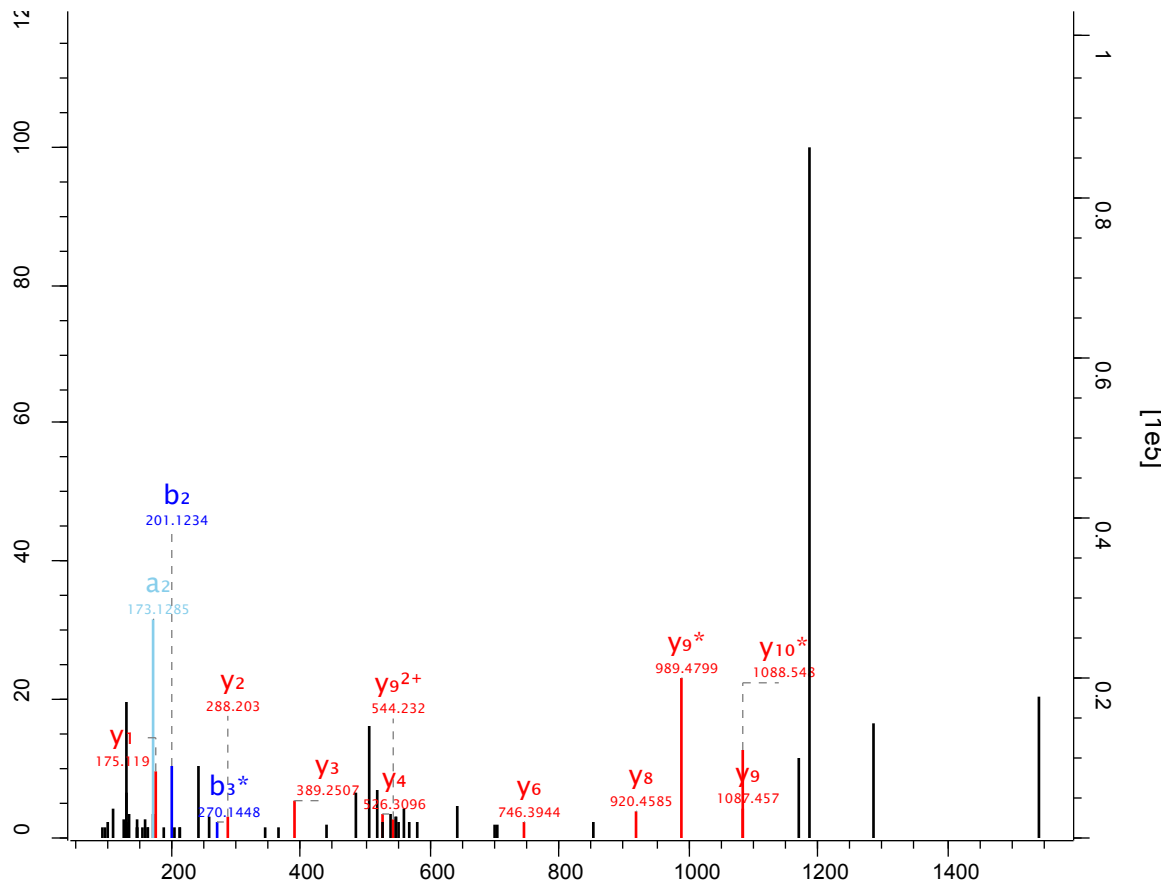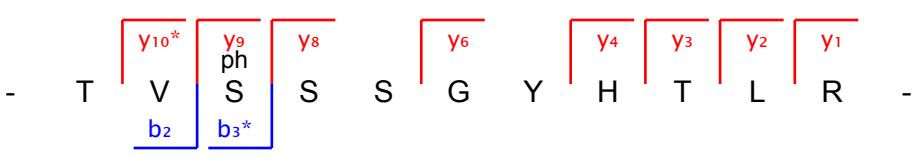

Raw file 2013\_COL15\_34\_38\_151128201608 Scan 4350 Method FTMS; HCD Score 138.97 m/z 516.53

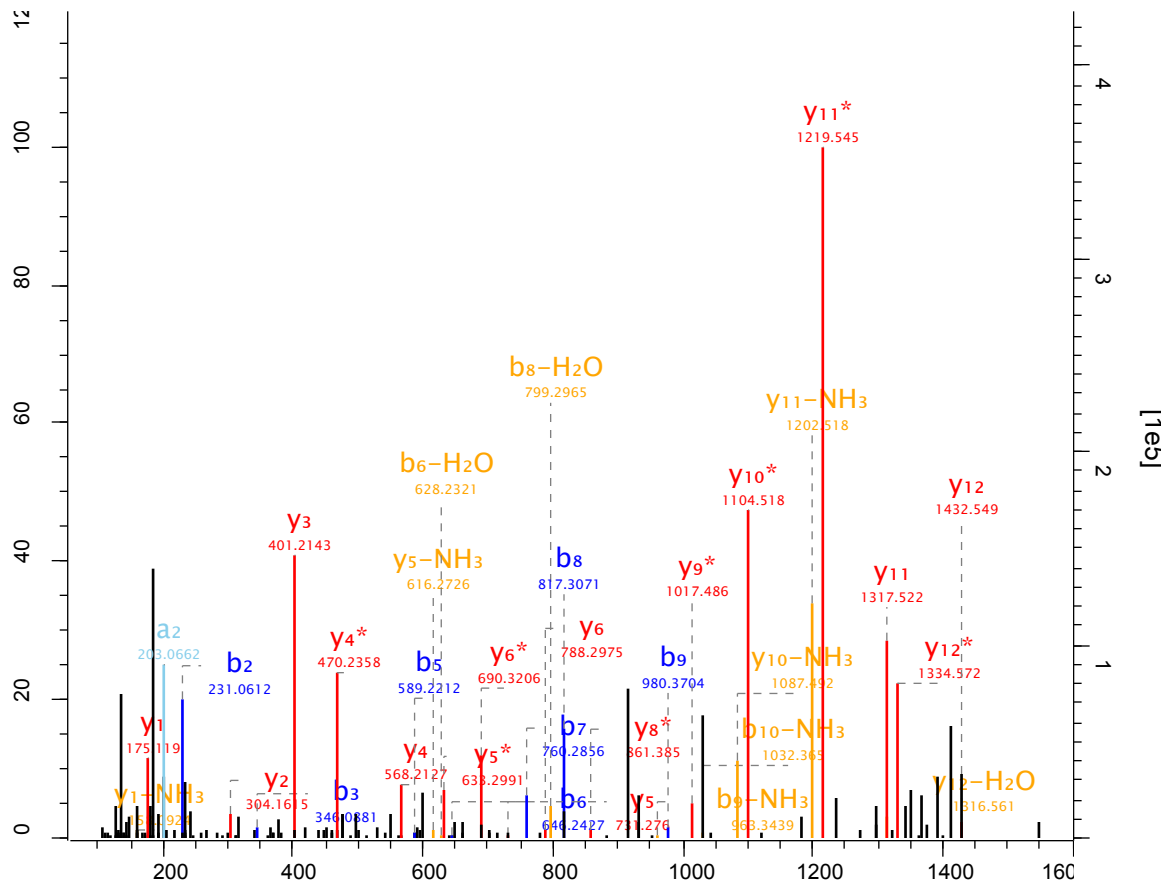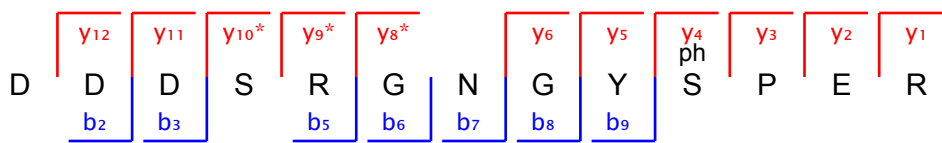

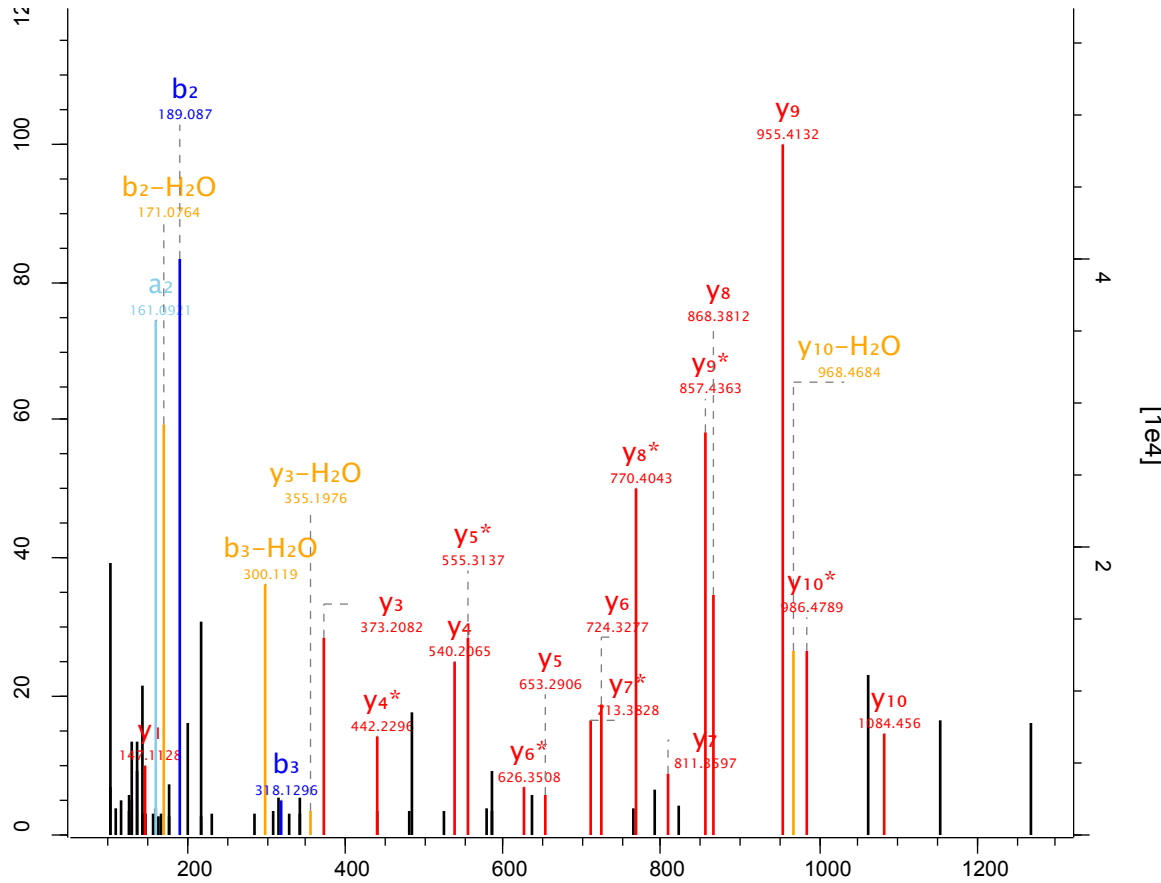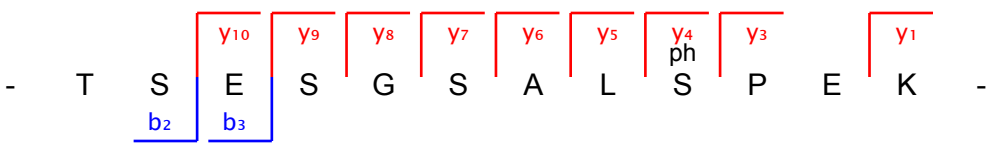

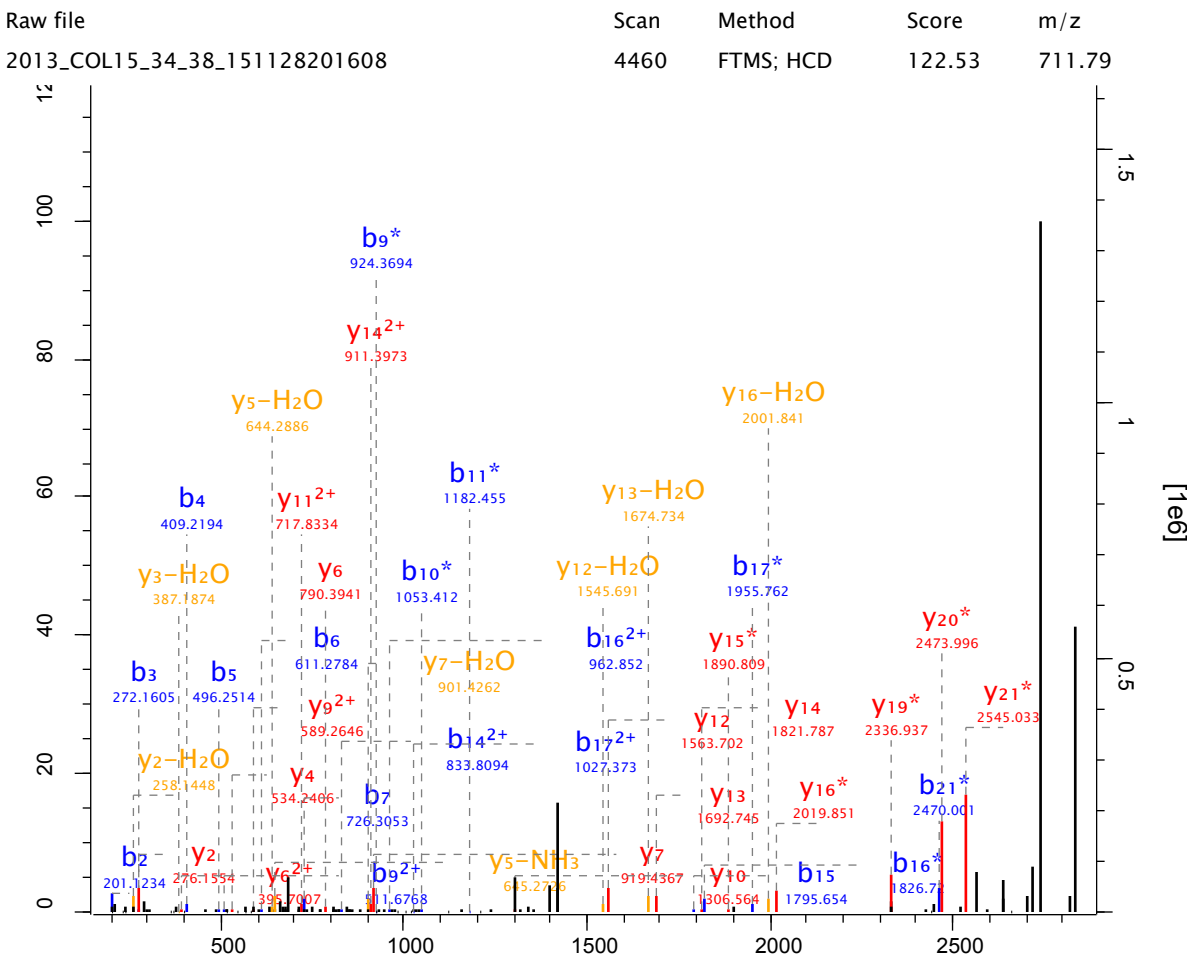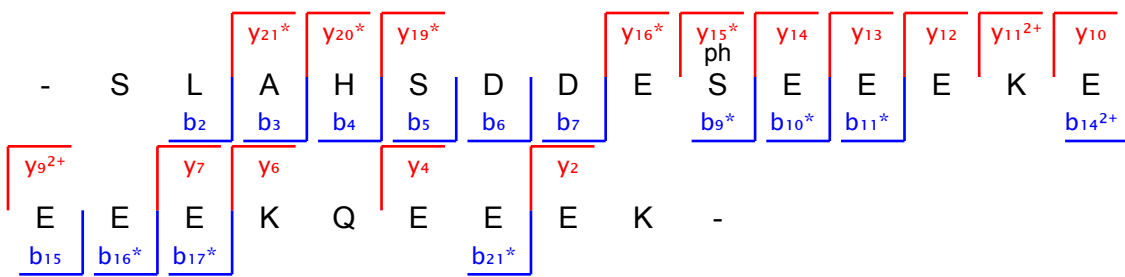

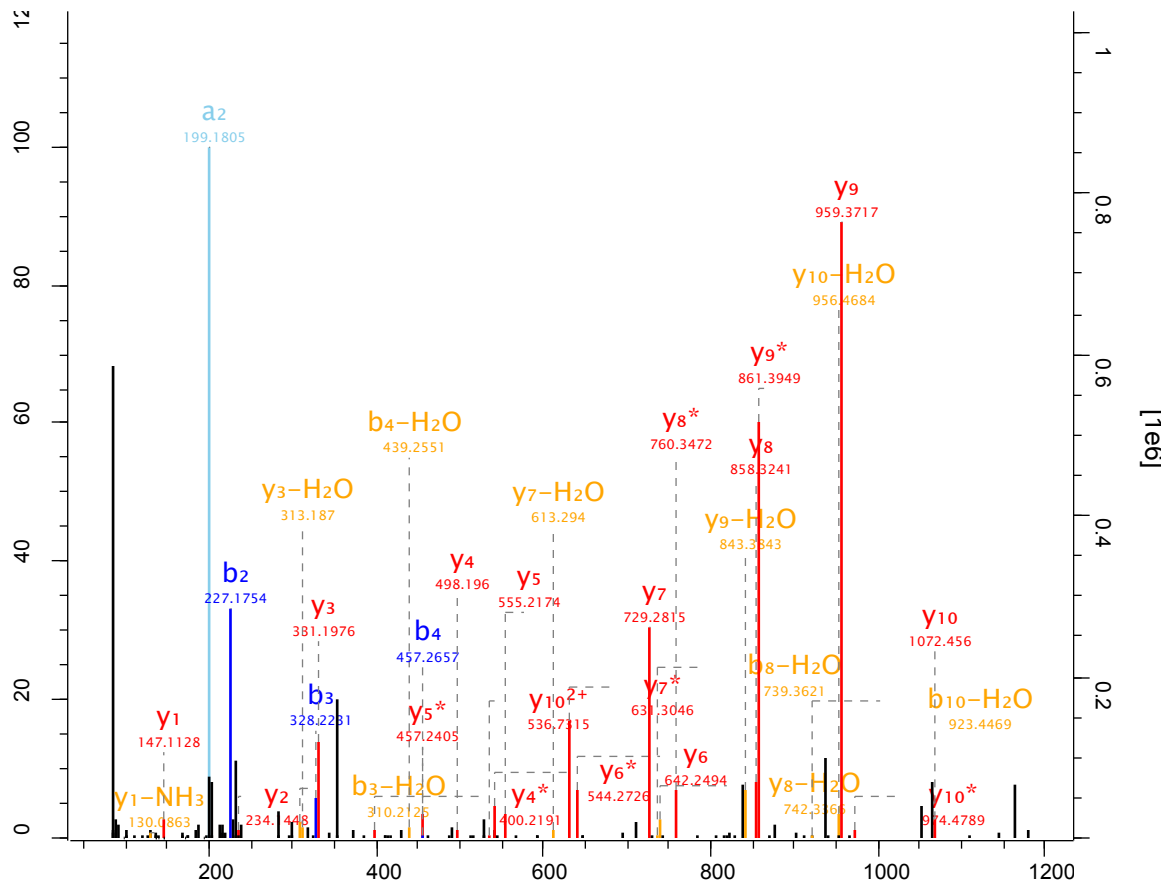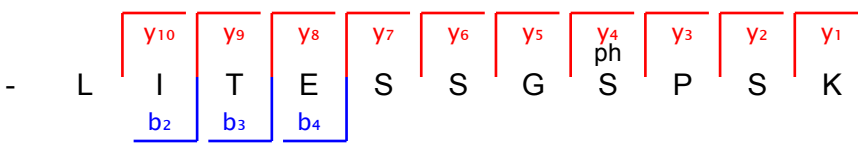



| Raw file                      | Scan | Method    | Score | m/z    |
|-------------------------------|------|-----------|-------|--------|
| 2013_COL15_34_38_151128201608 | 4595 | FTMS; HCD | 46.16 | 564.74 |

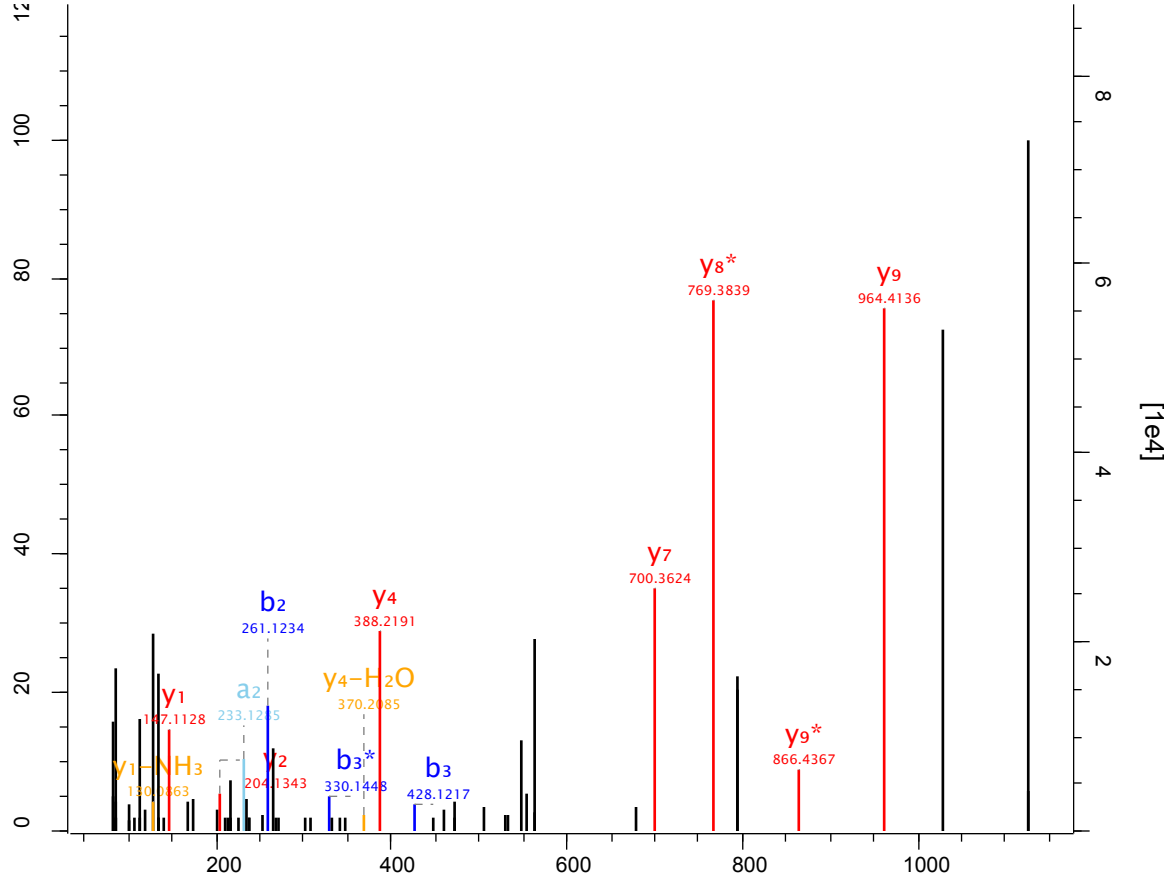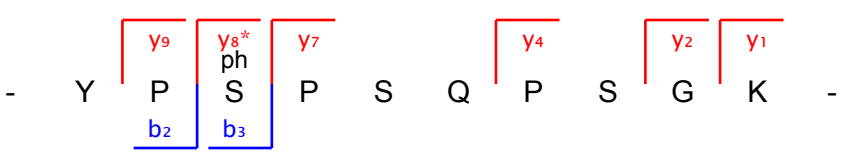

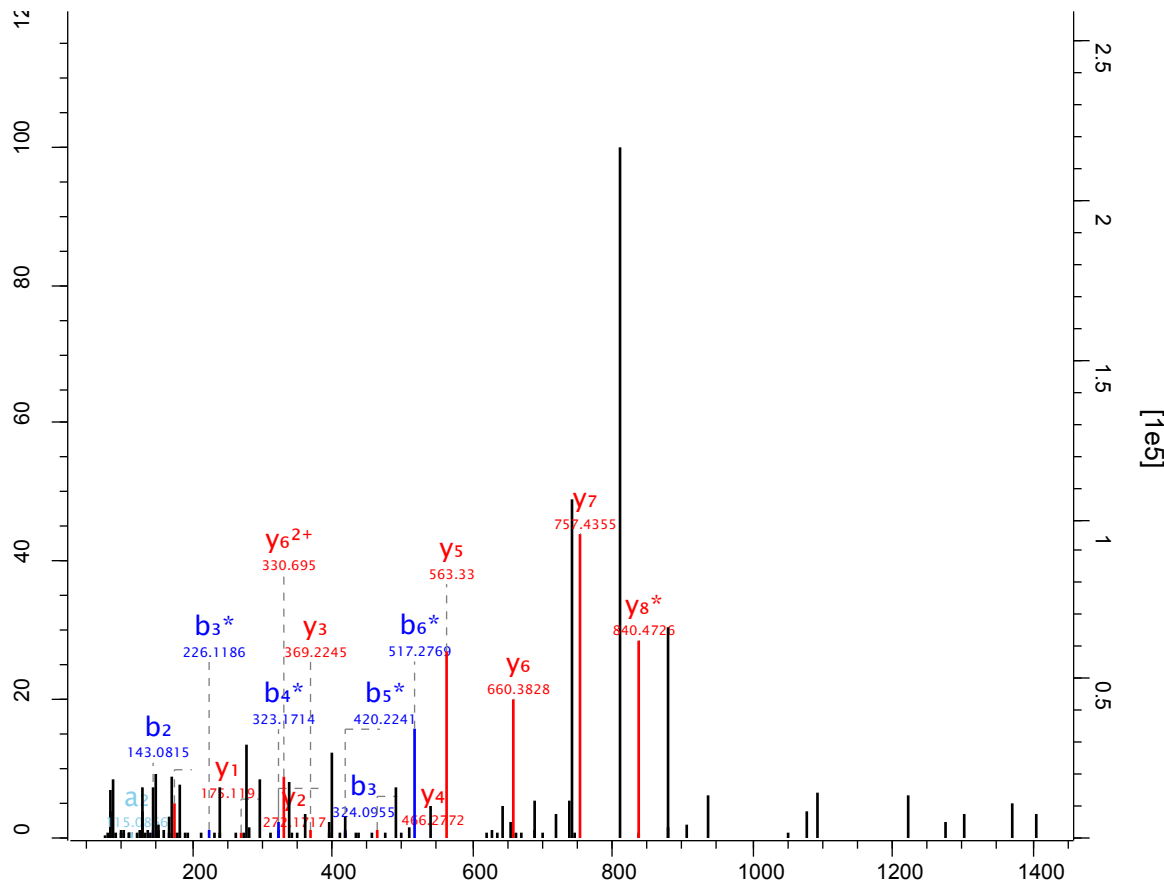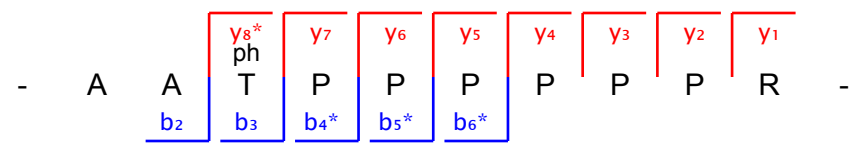

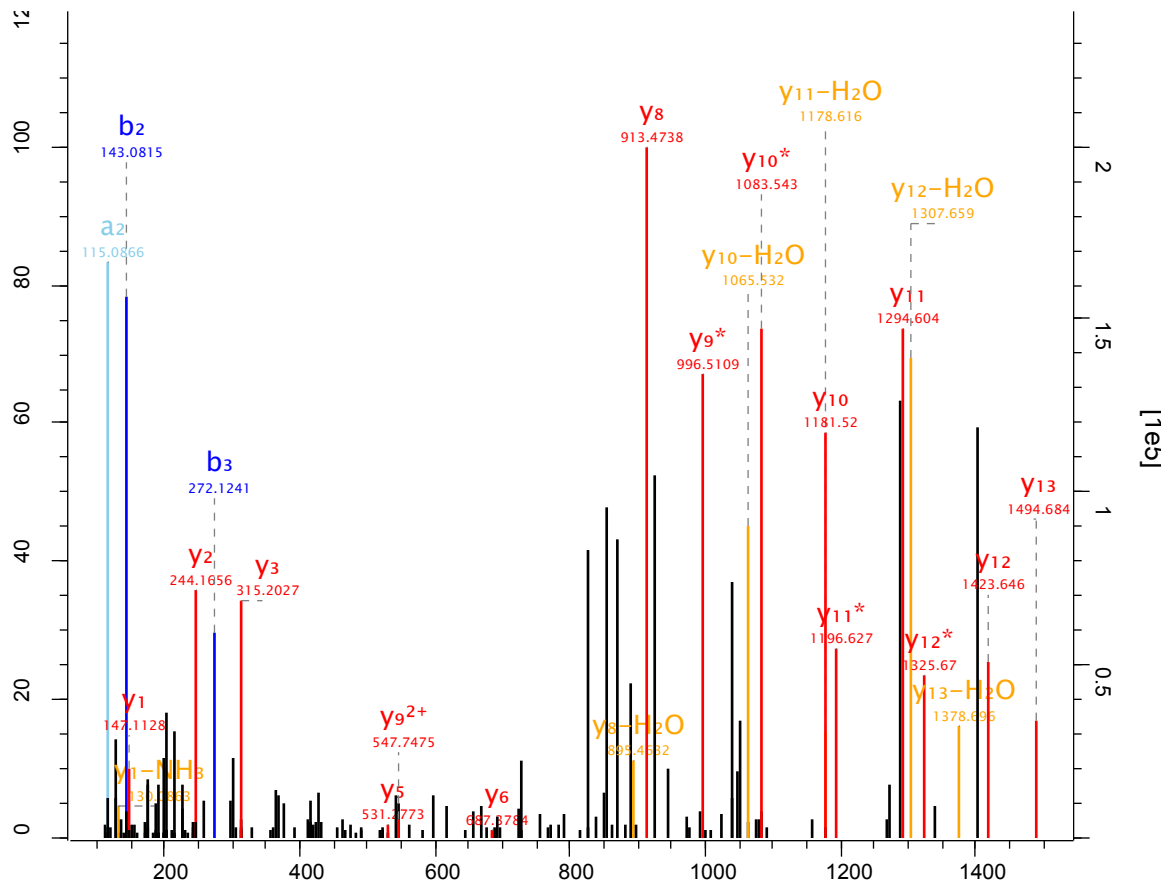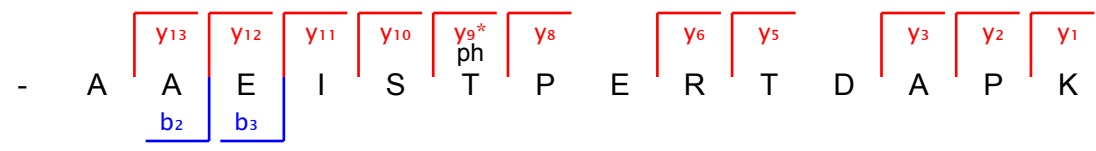

2013\_COL15\_34\_38\_151128201608

4661

FTMS; HCD

114.4

483.23

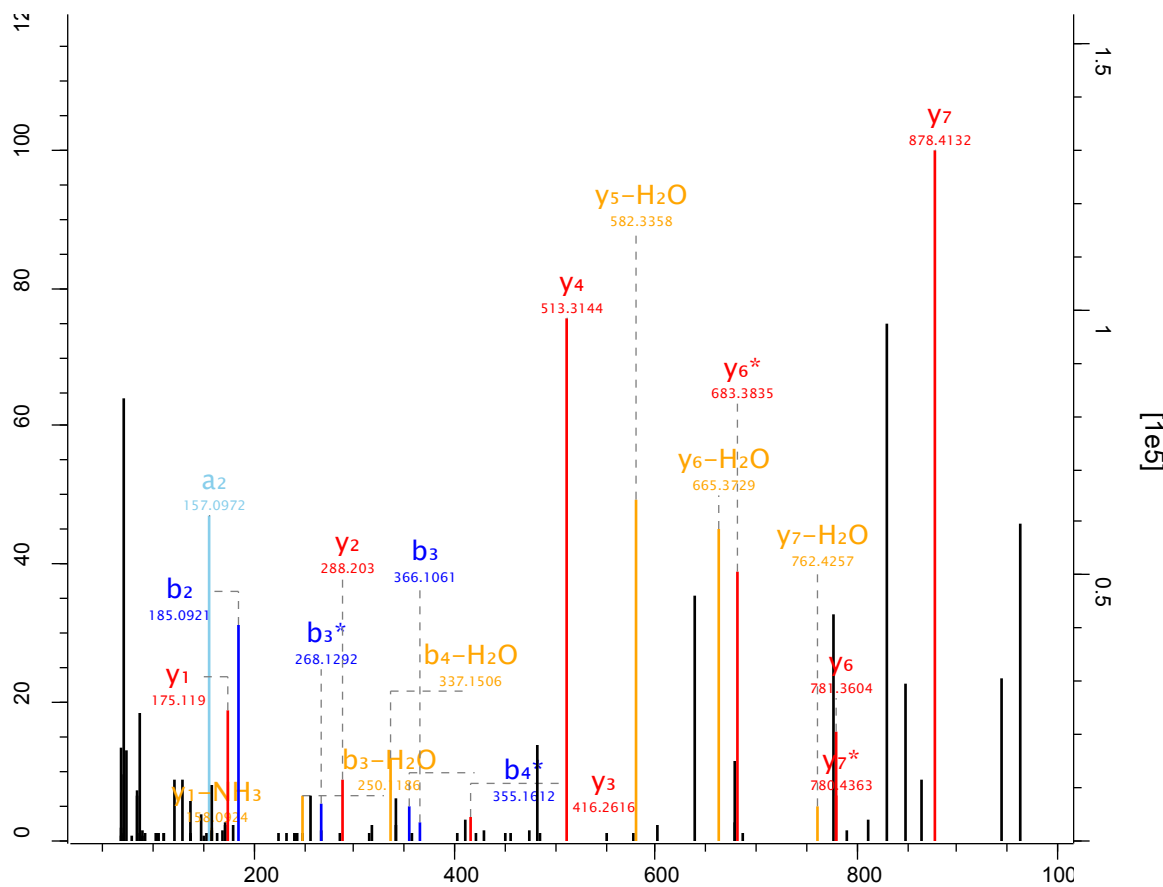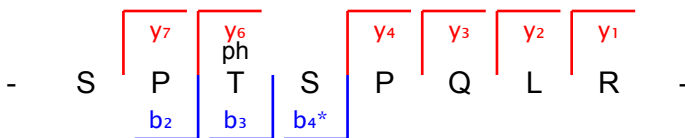

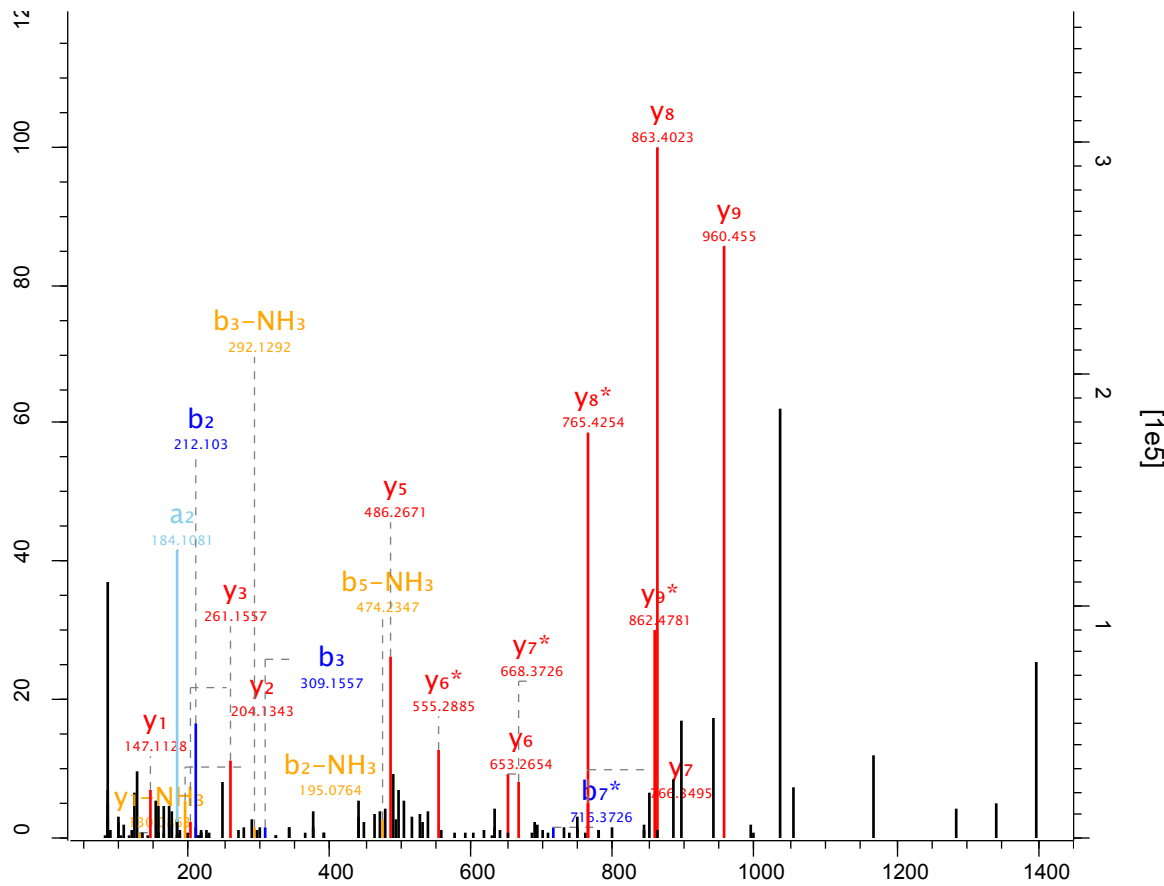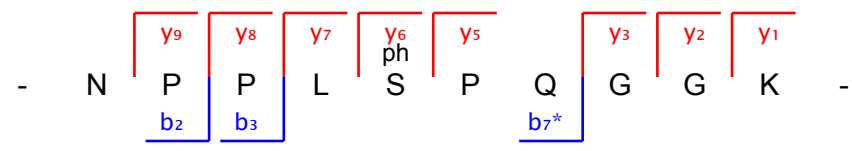

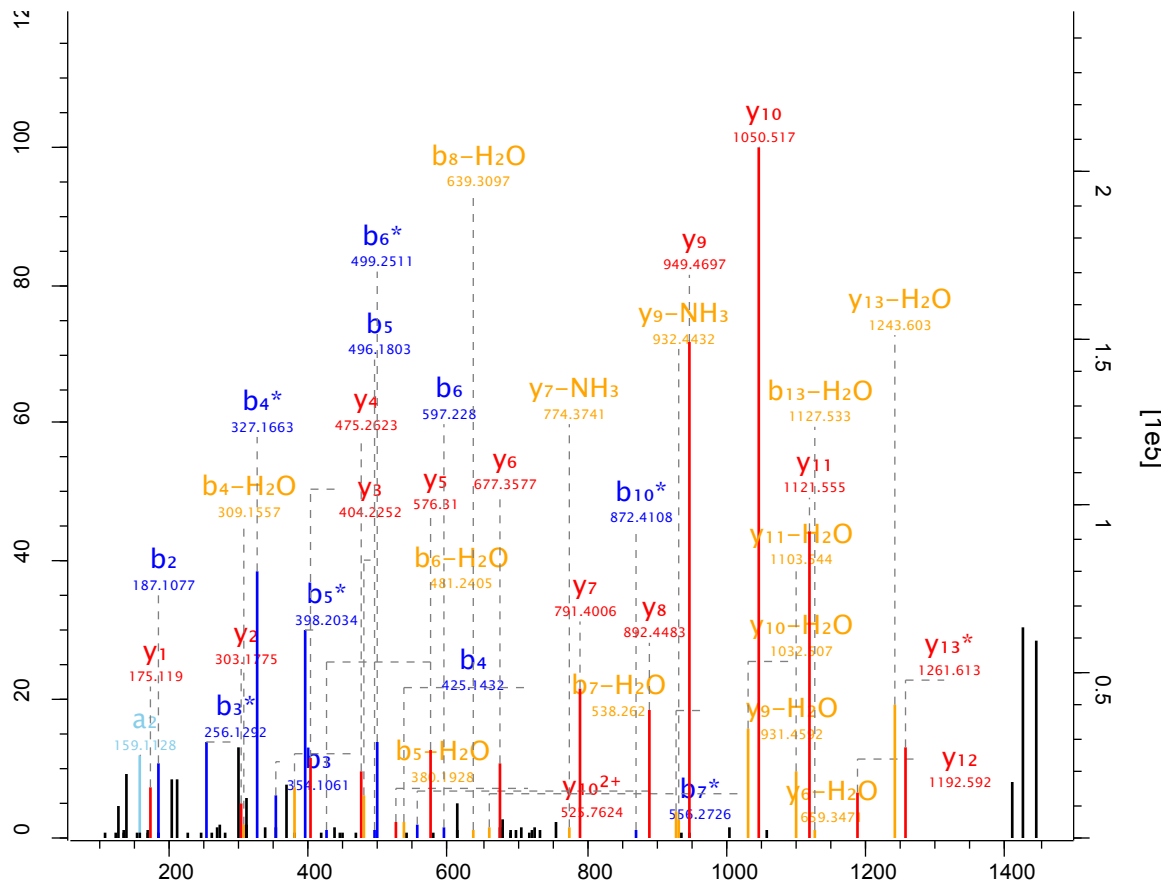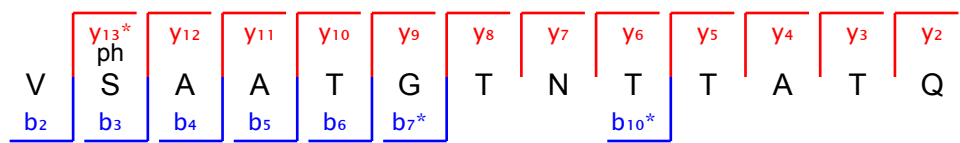

y1  
R

2013\_COL15\_34\_38\_151128201608

4962

FTMS; HCD

67.02

578.75

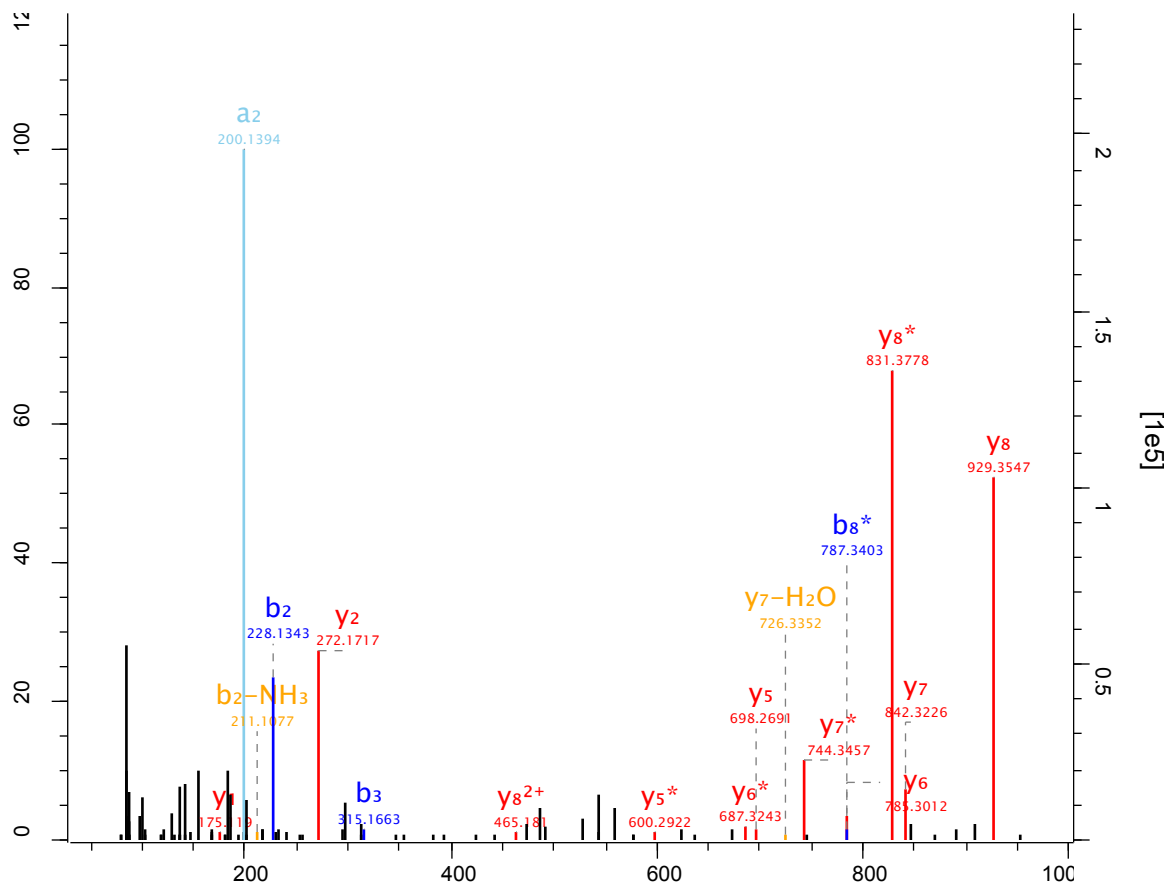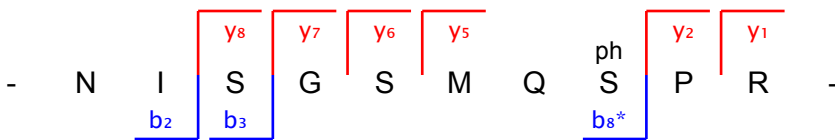

| Raw file                      | Scan | Method    | Score | m/z    |
|-------------------------------|------|-----------|-------|--------|
| 2013_COL15_34_38_151128201608 | 5121 | FTMS; HCD | 50.1  | 641.78 |

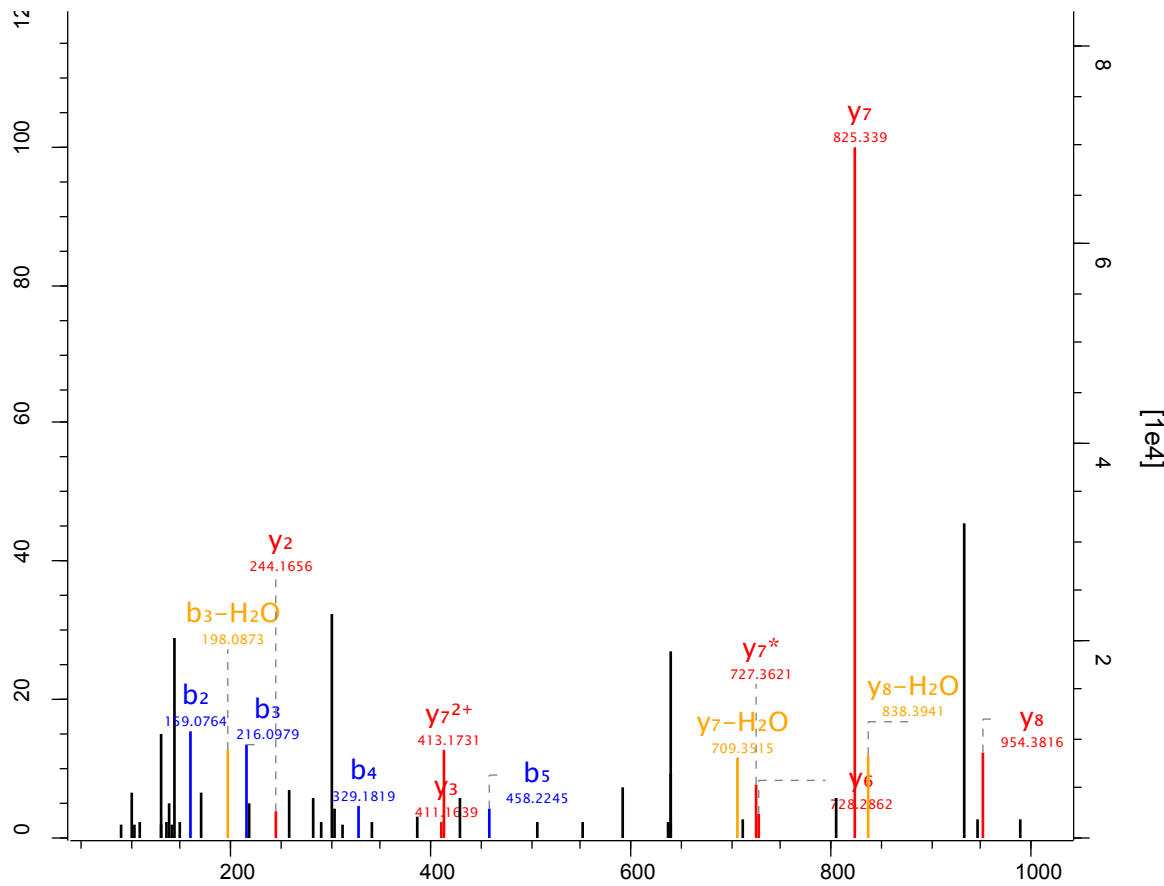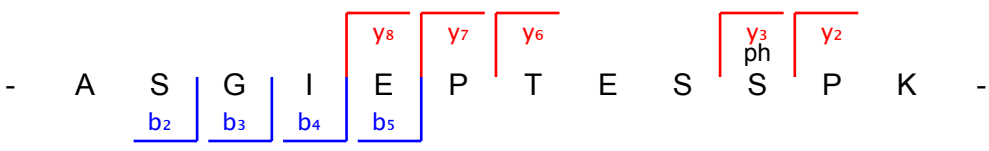



Raw file 2013\_COL15\_34\_38\_151128201608 Scan 5139 Method FTMS; HCD Score 51.59 m/z 562.77

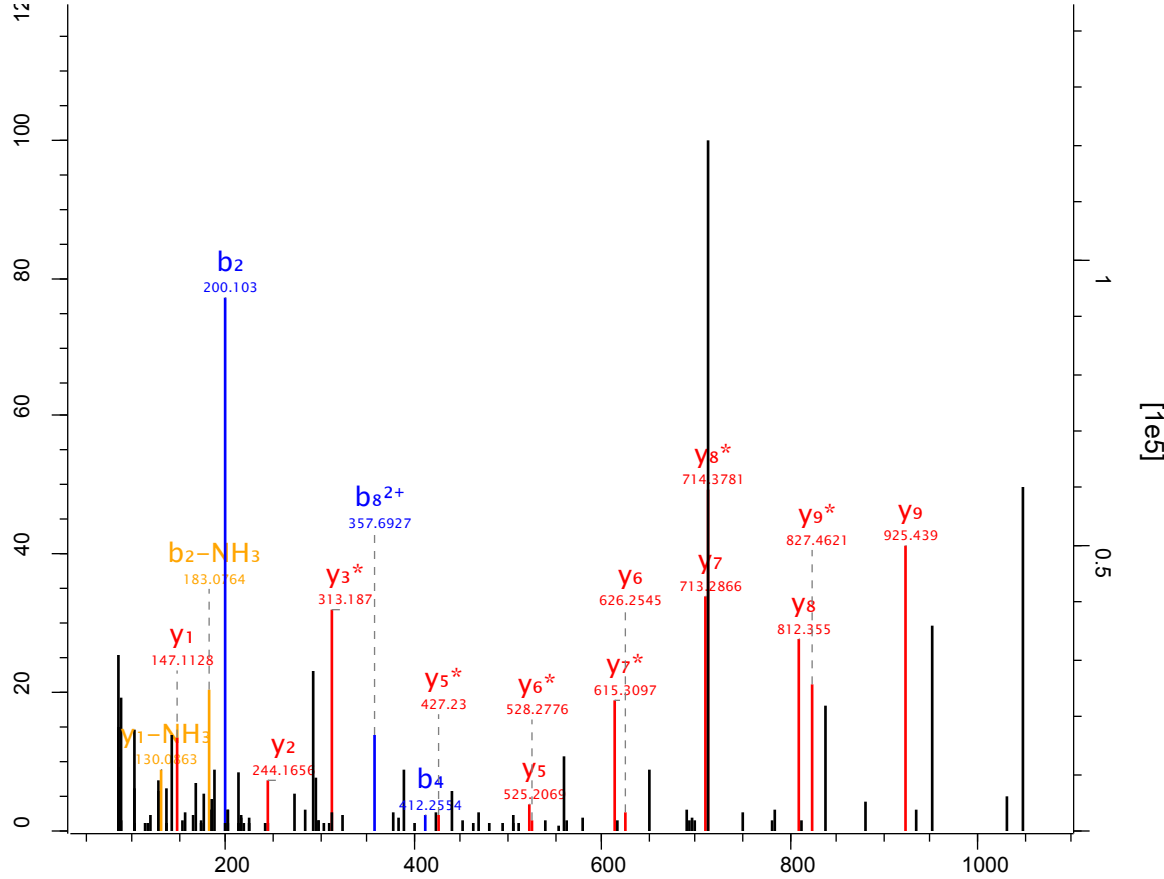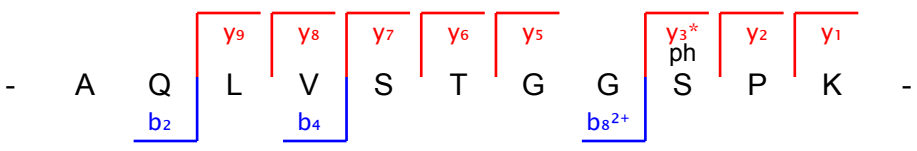

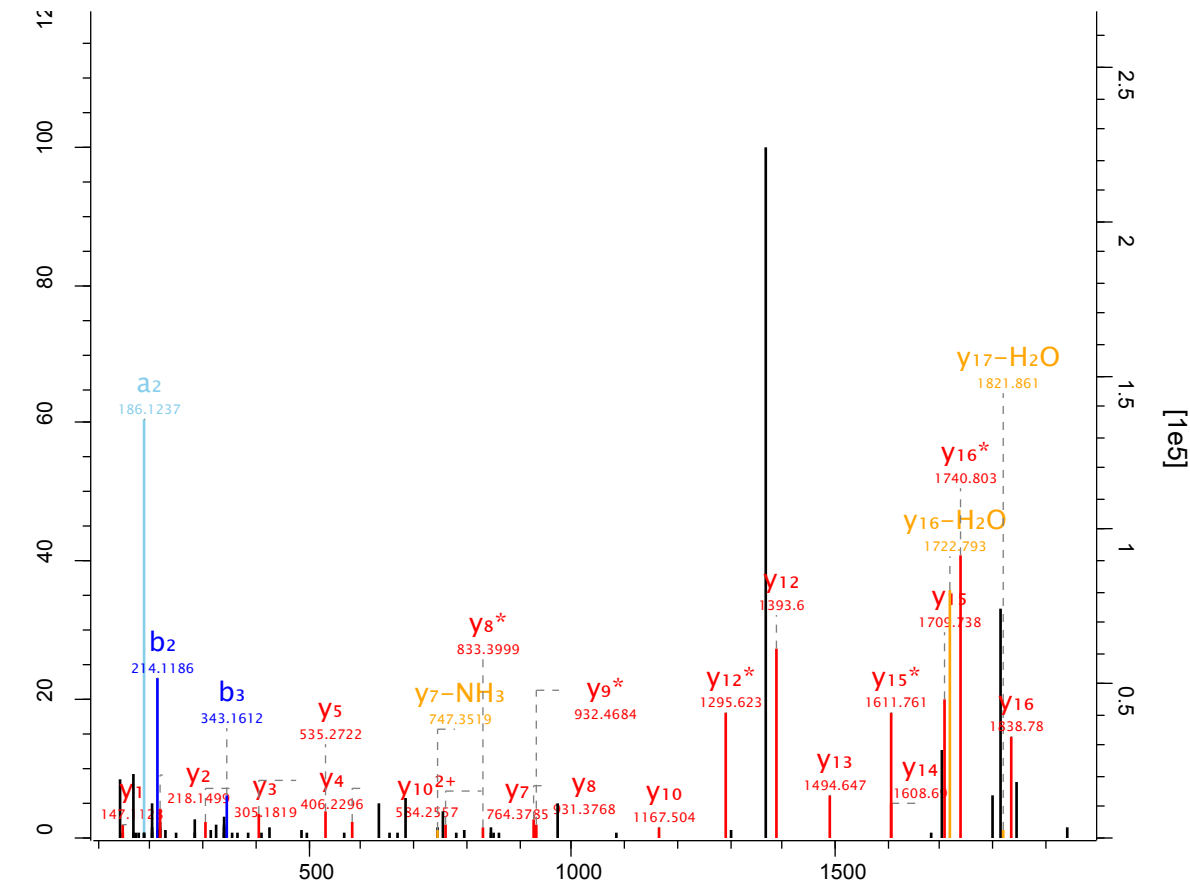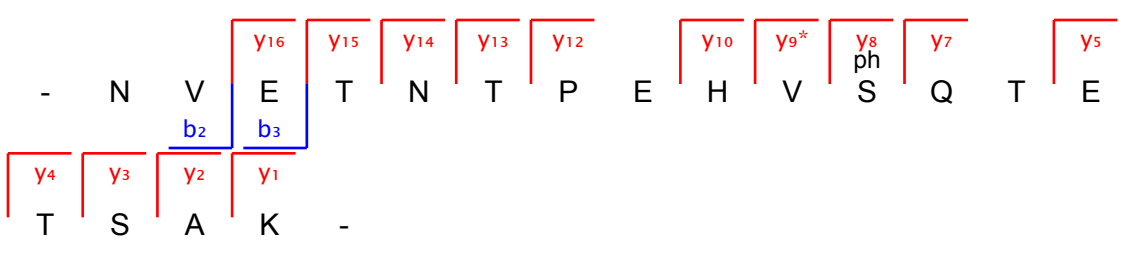

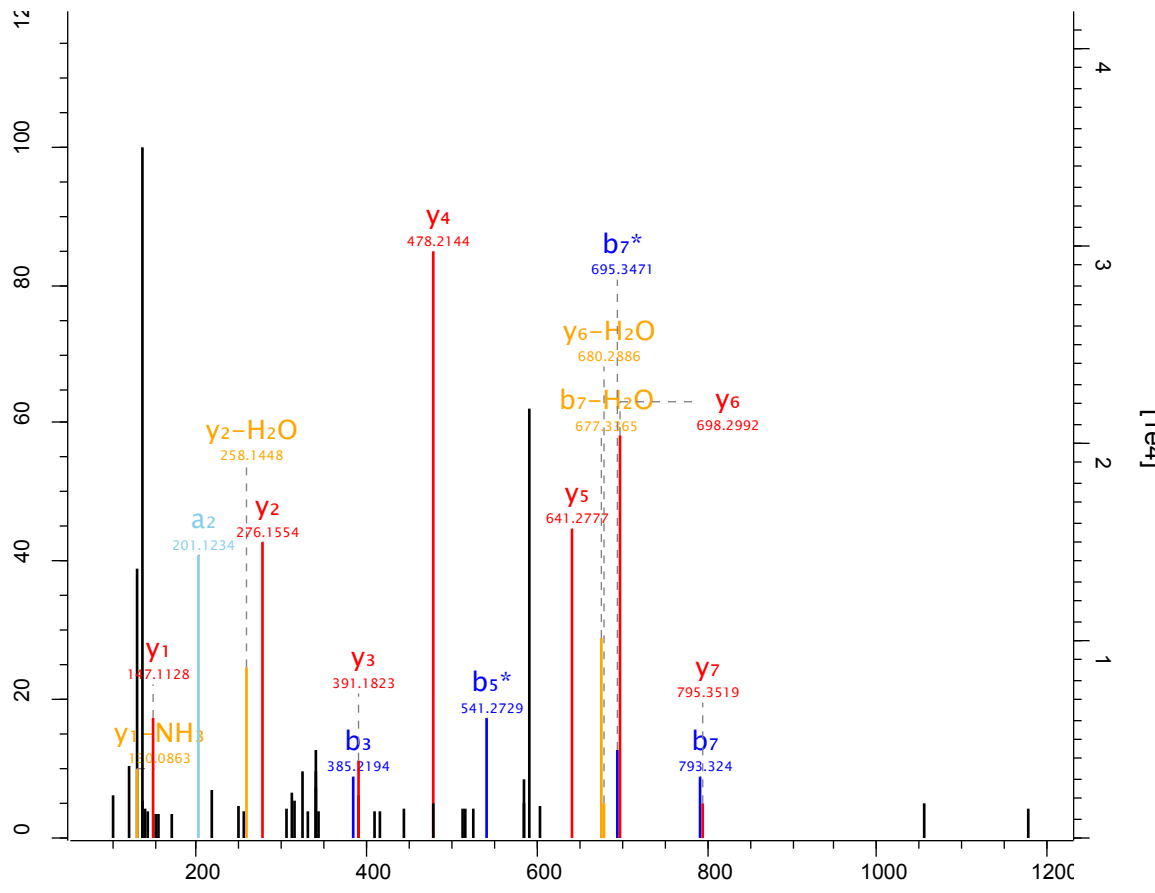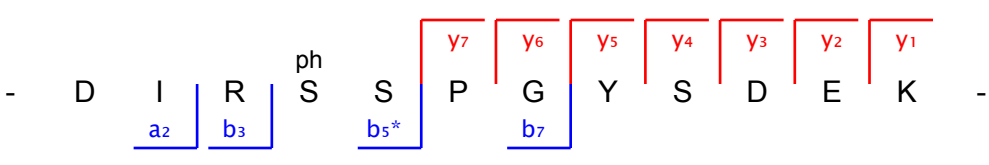

2013\_COL15\_34\_38\_151128201608

5179

FTMS; HCD

109.79

488.69

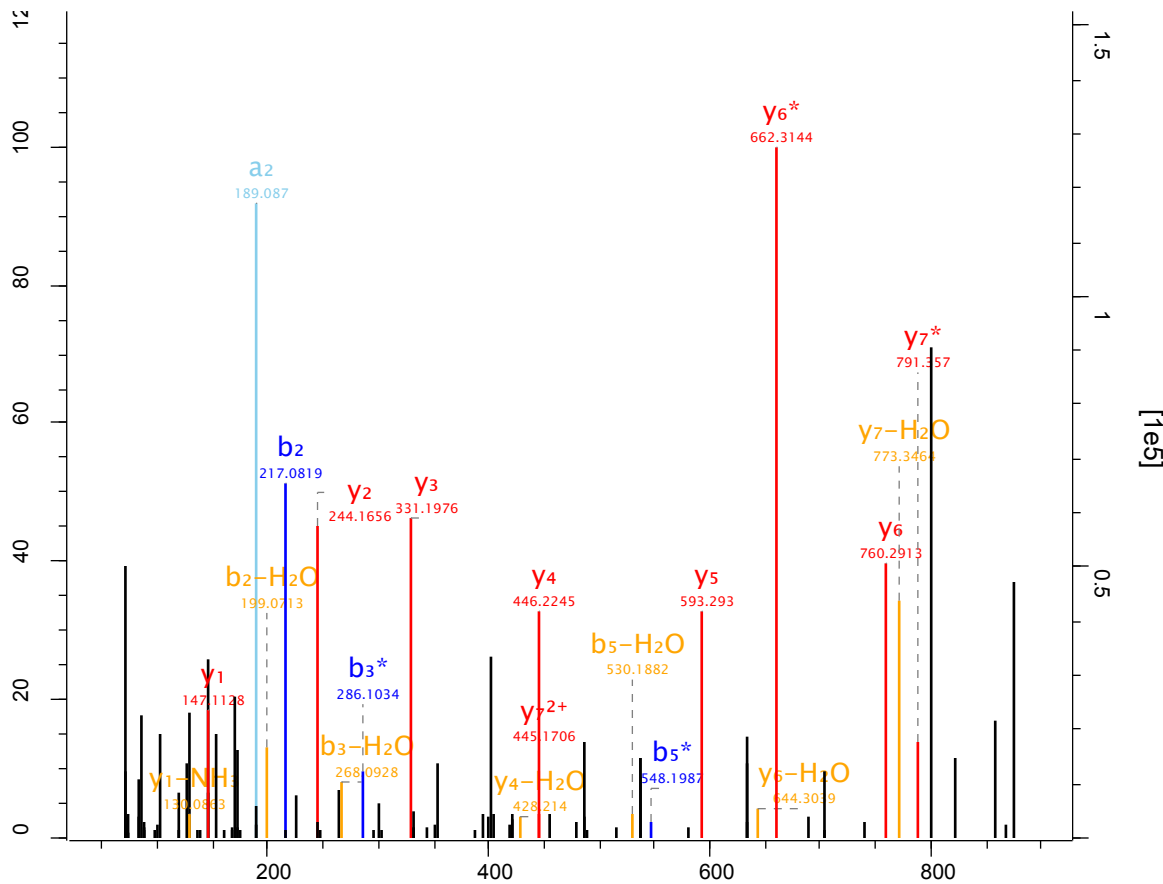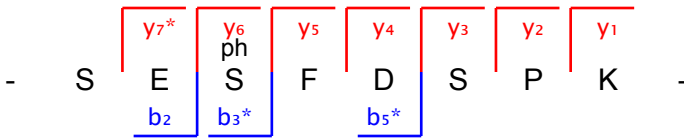

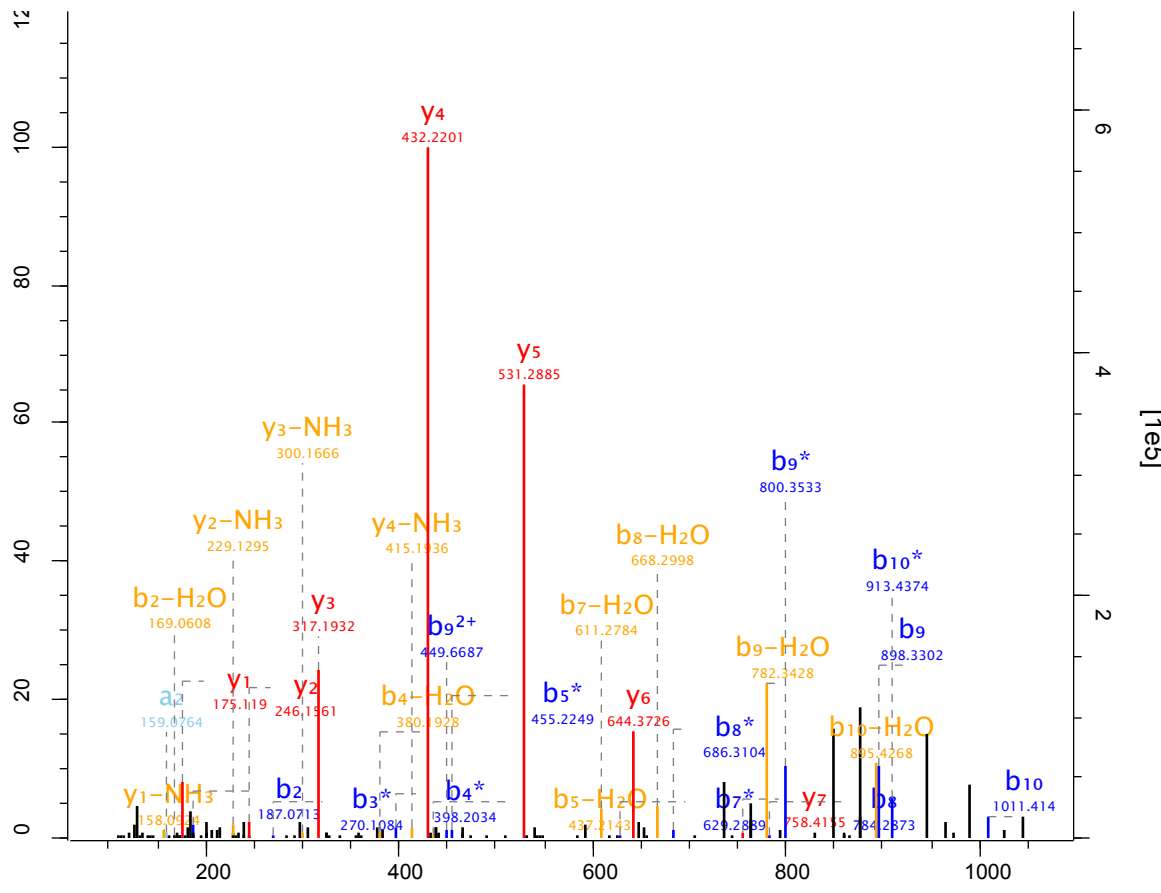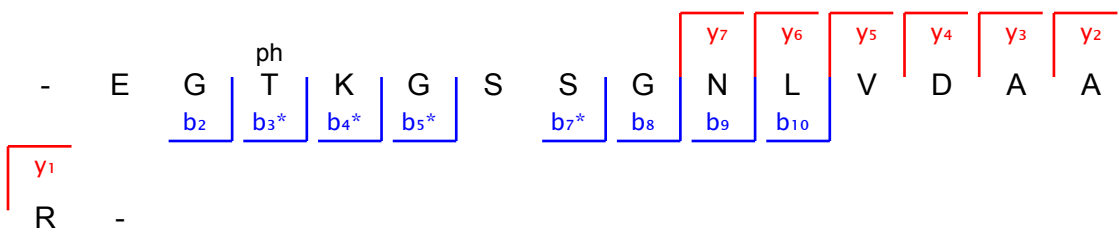

2013\_COL15\_34\_38\_151128201608

5227

FTMS; HCD

198.29

555.75

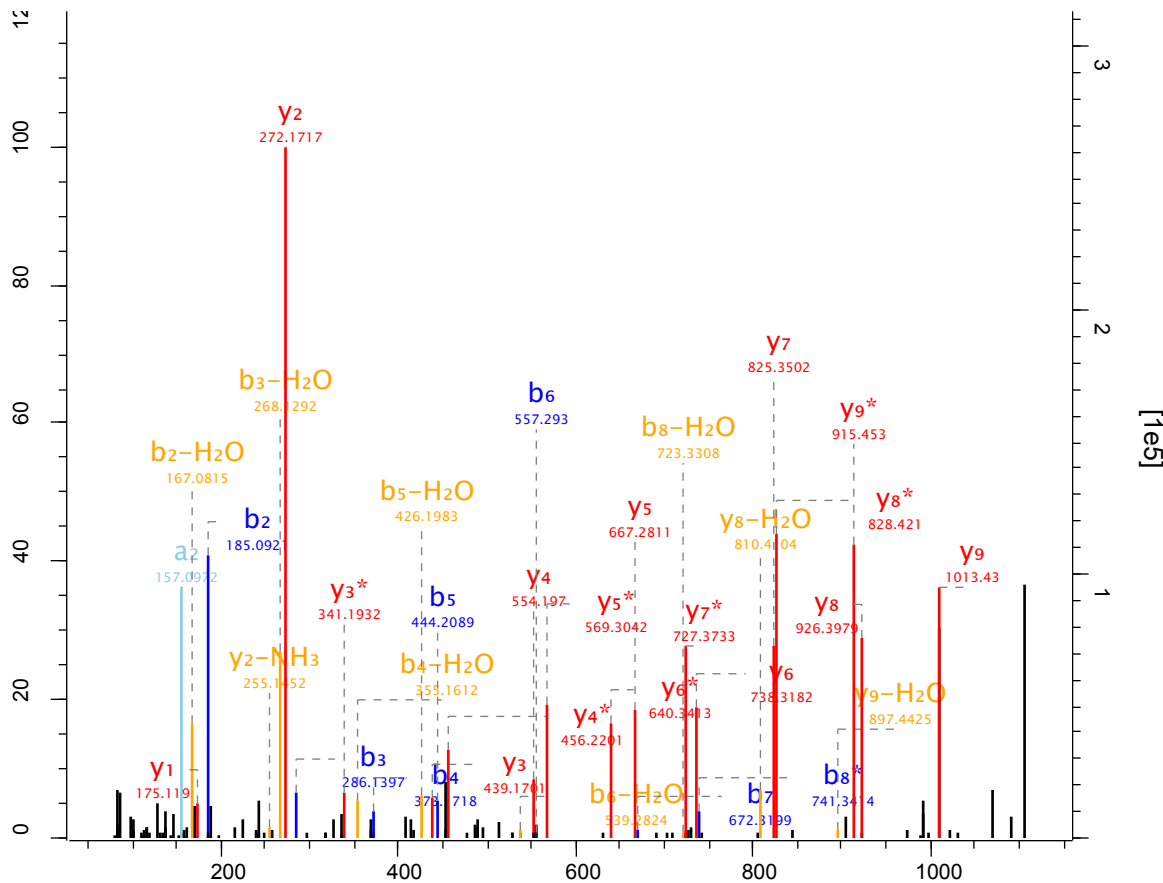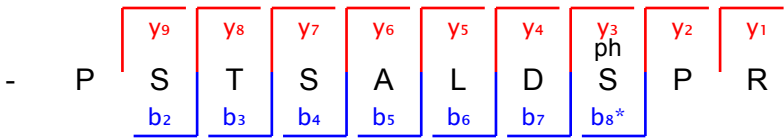

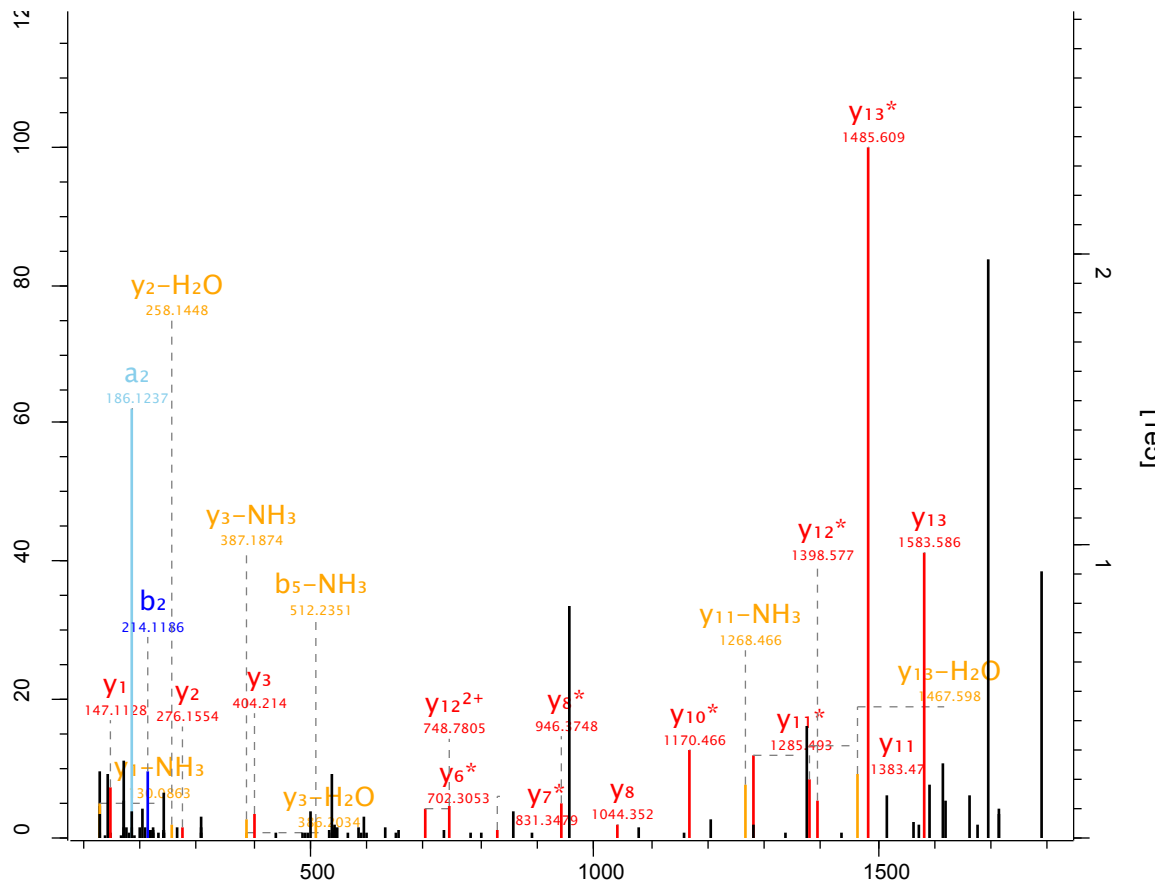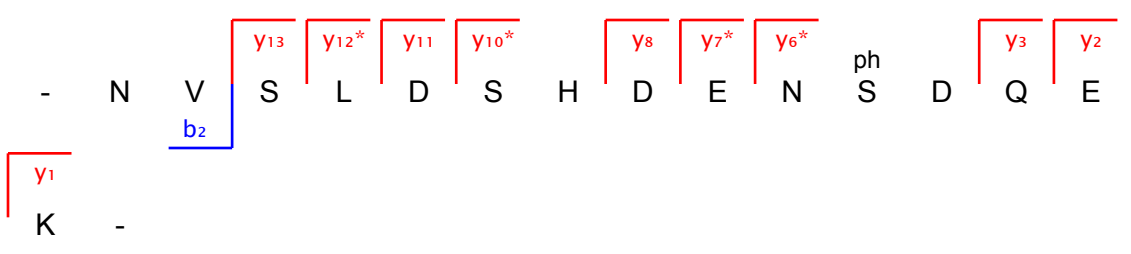

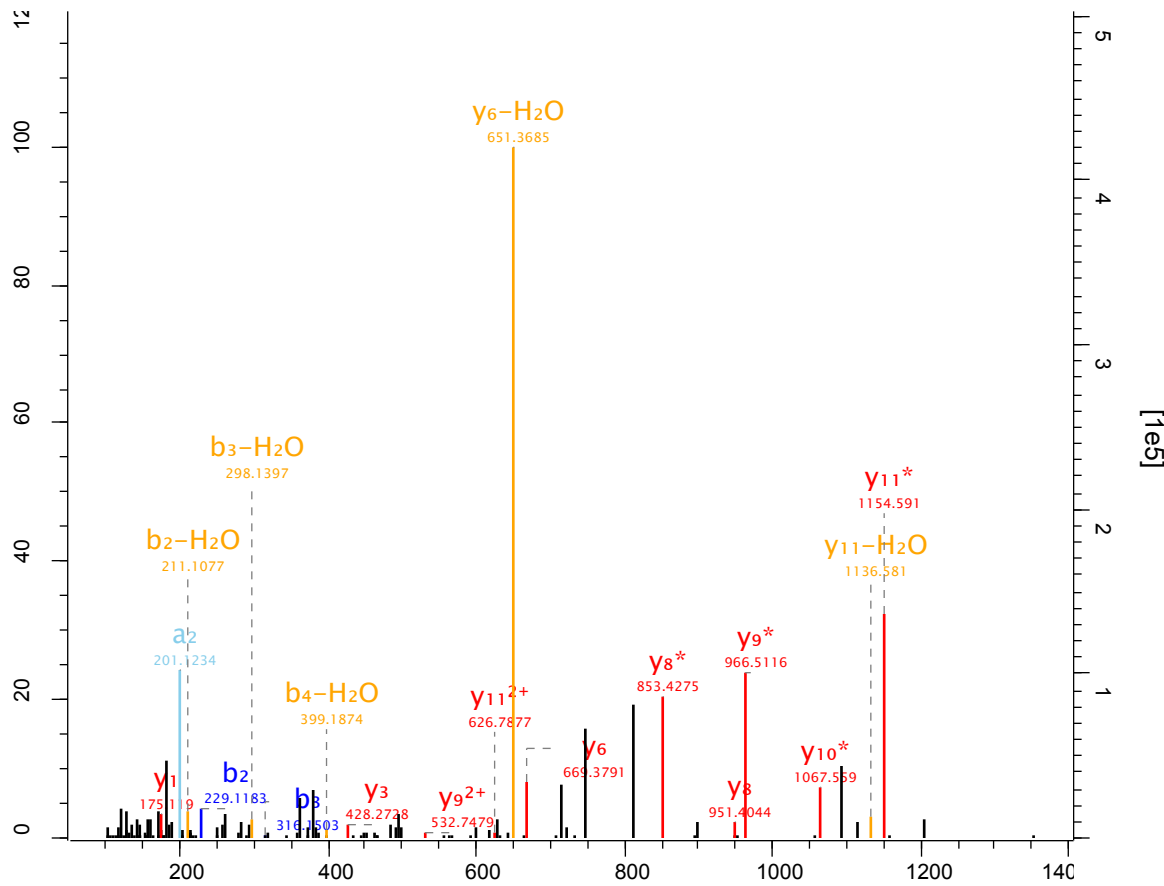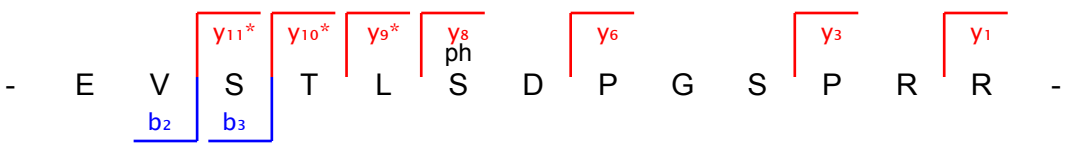



| Raw file                      | Scan | Method    | Score | m/z    |
|-------------------------------|------|-----------|-------|--------|
| 2013_COL15_34_38_151128201608 | 5412 | FTMS; HCD | 46.89 | 477.21 |

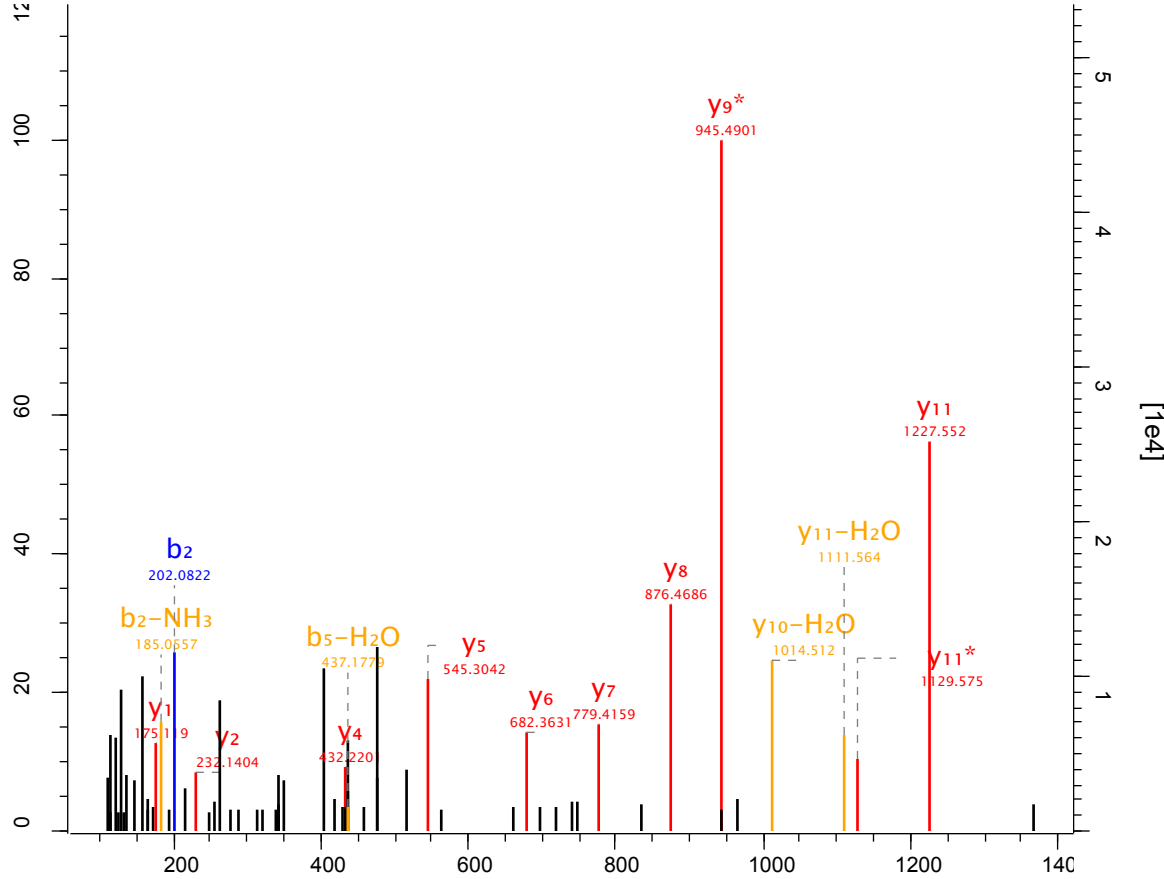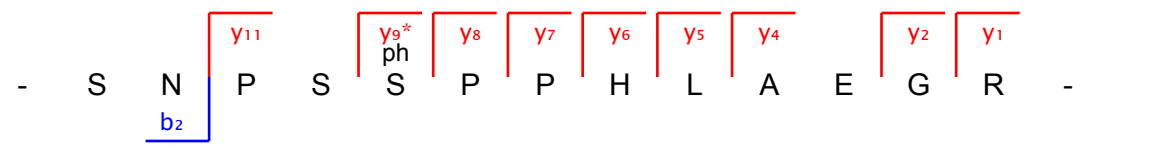

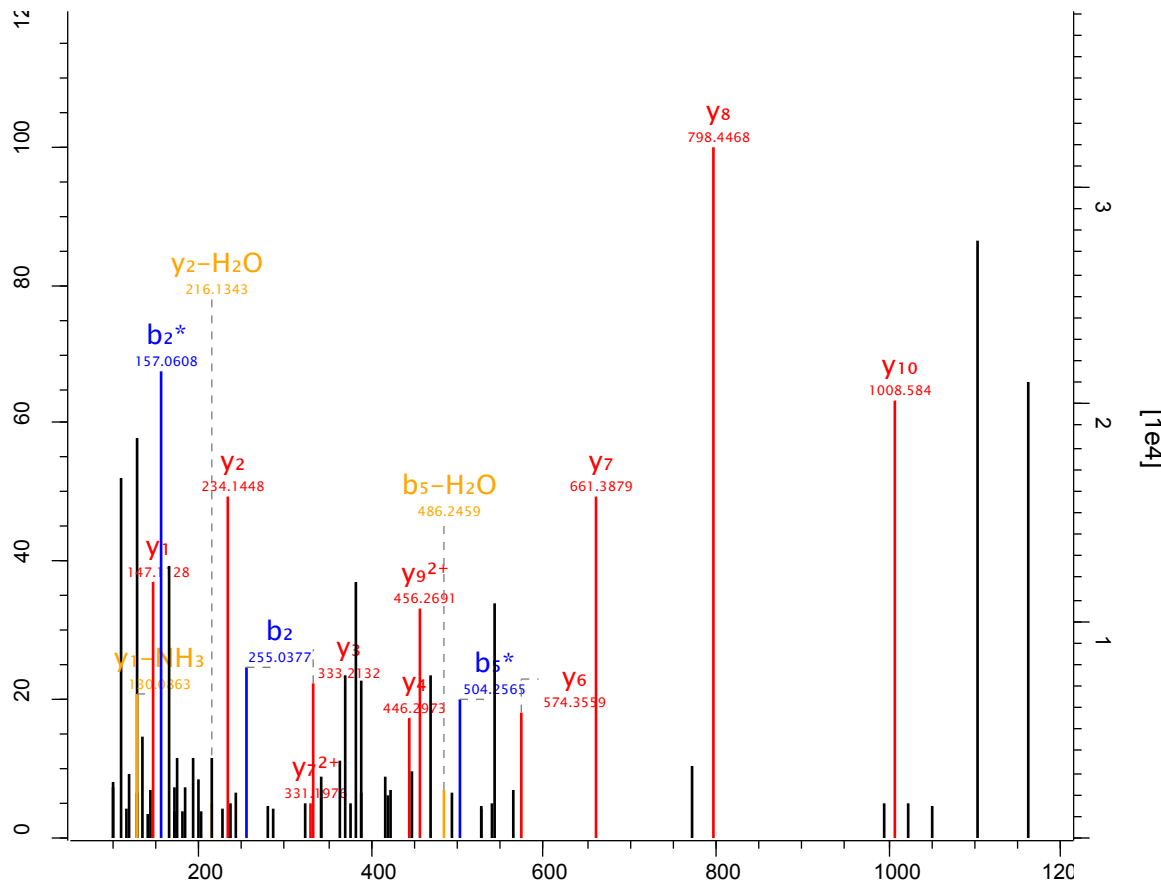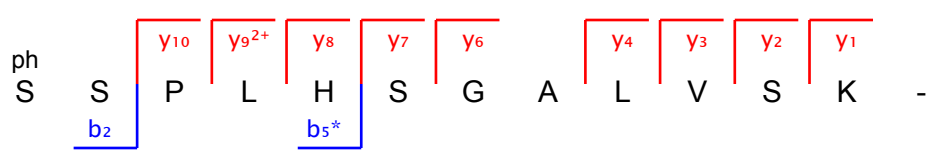

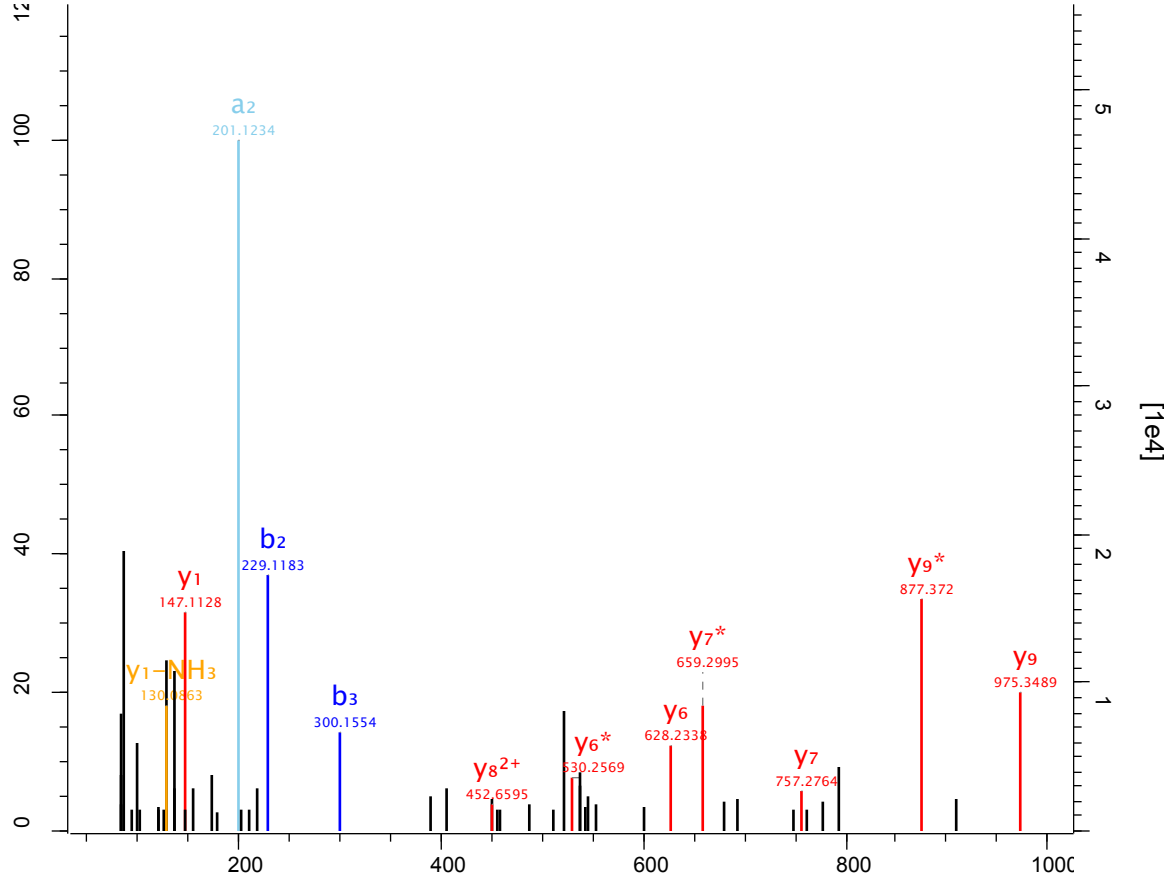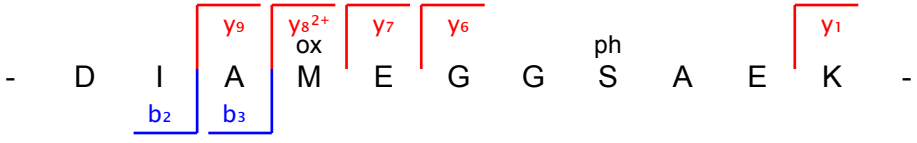

2013\_COL15\_34\_38\_151128201608

5539

FTMS; HCD

50.9

570.77

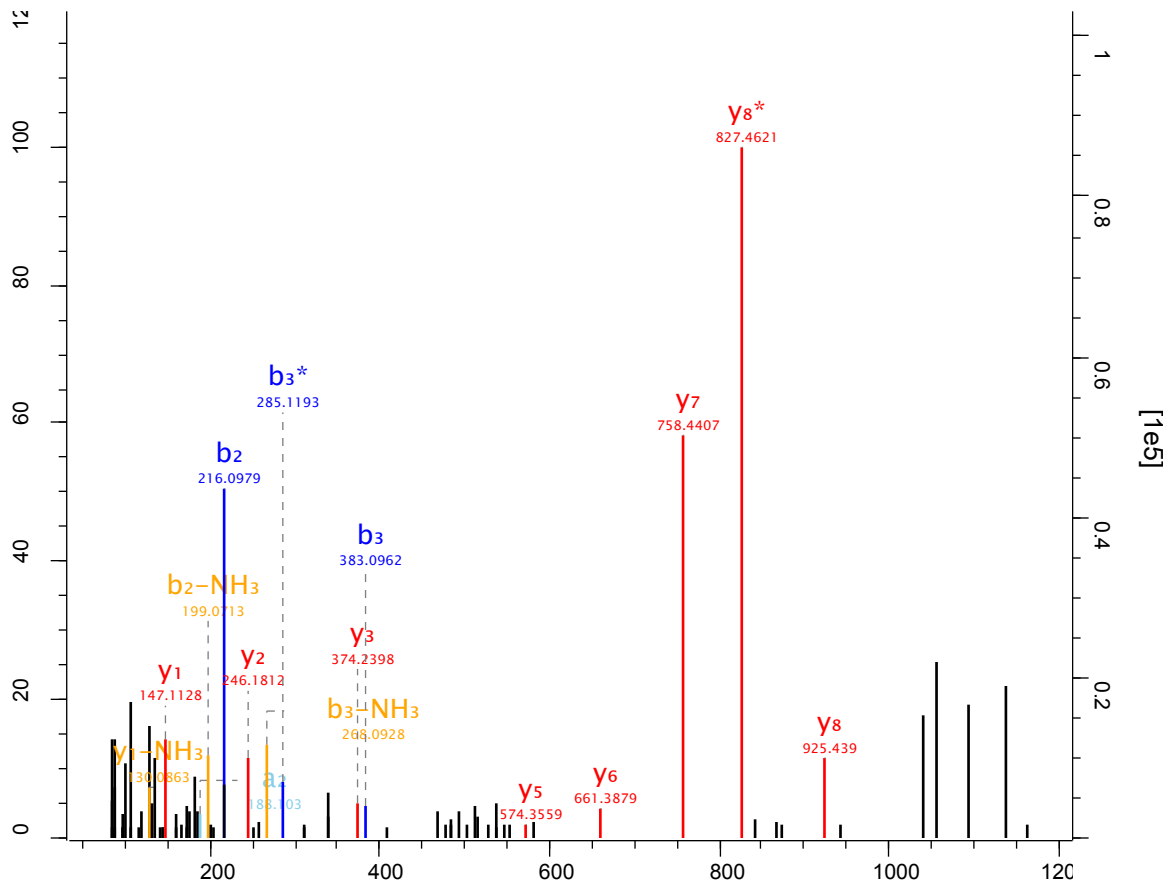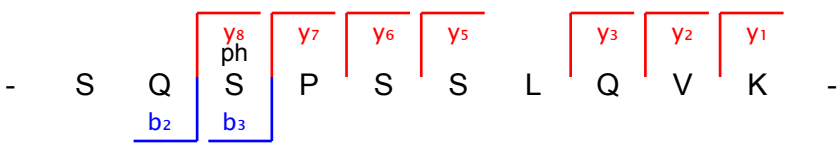

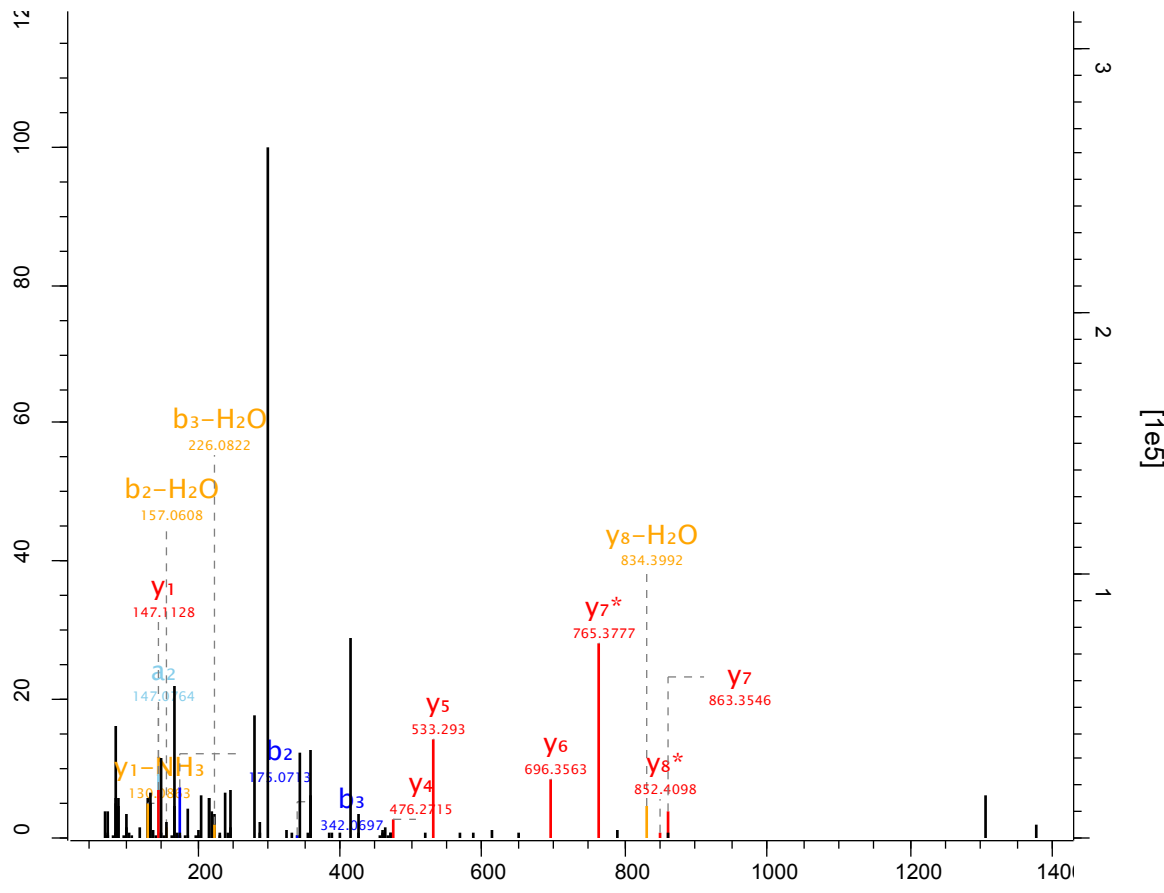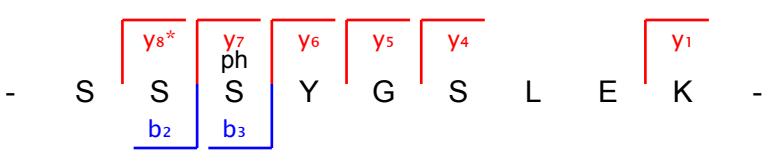

| Raw file                      | Scan | Method    | Score | m/z    |
|-------------------------------|------|-----------|-------|--------|
| 2013_COL15_34_38_151128201608 | 5654 | FTMS; HCD | 49.45 | 536.21 |

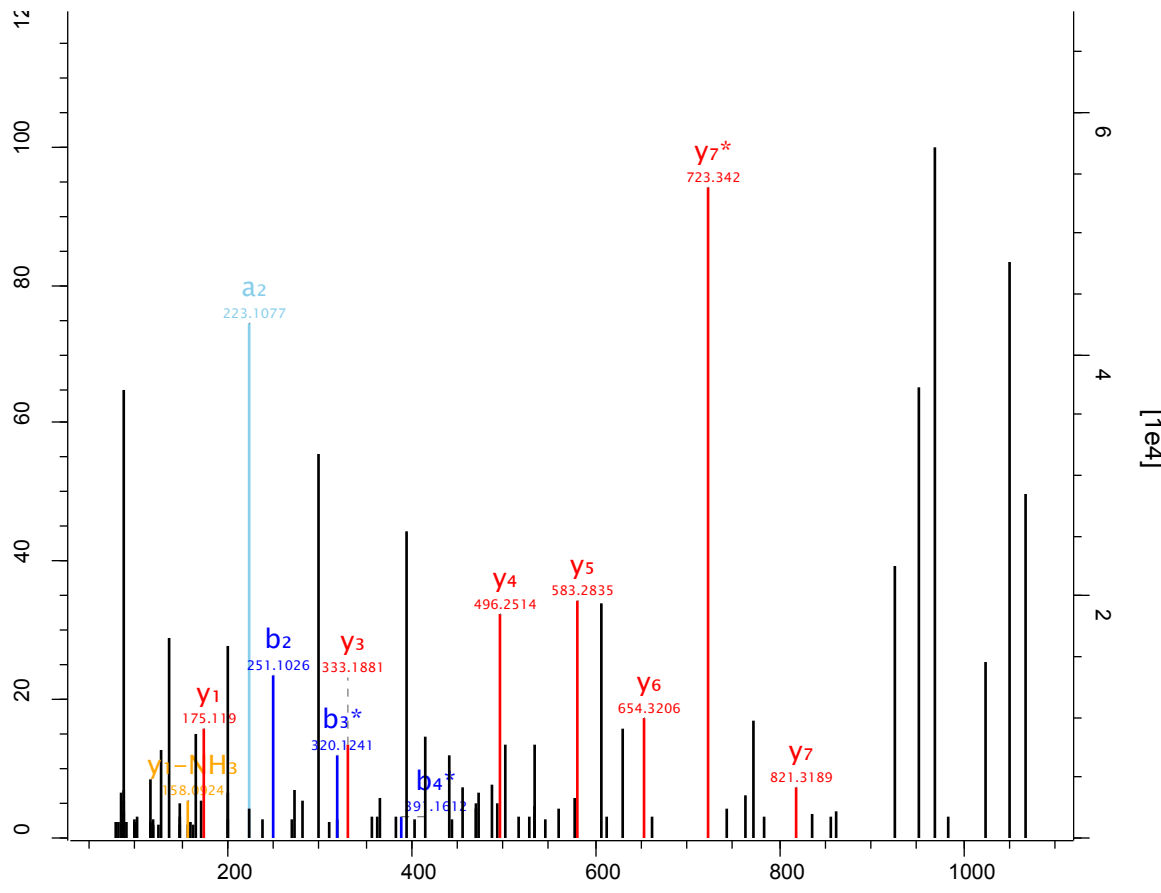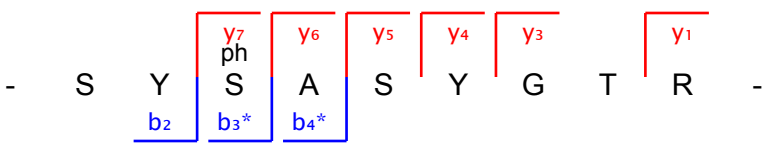

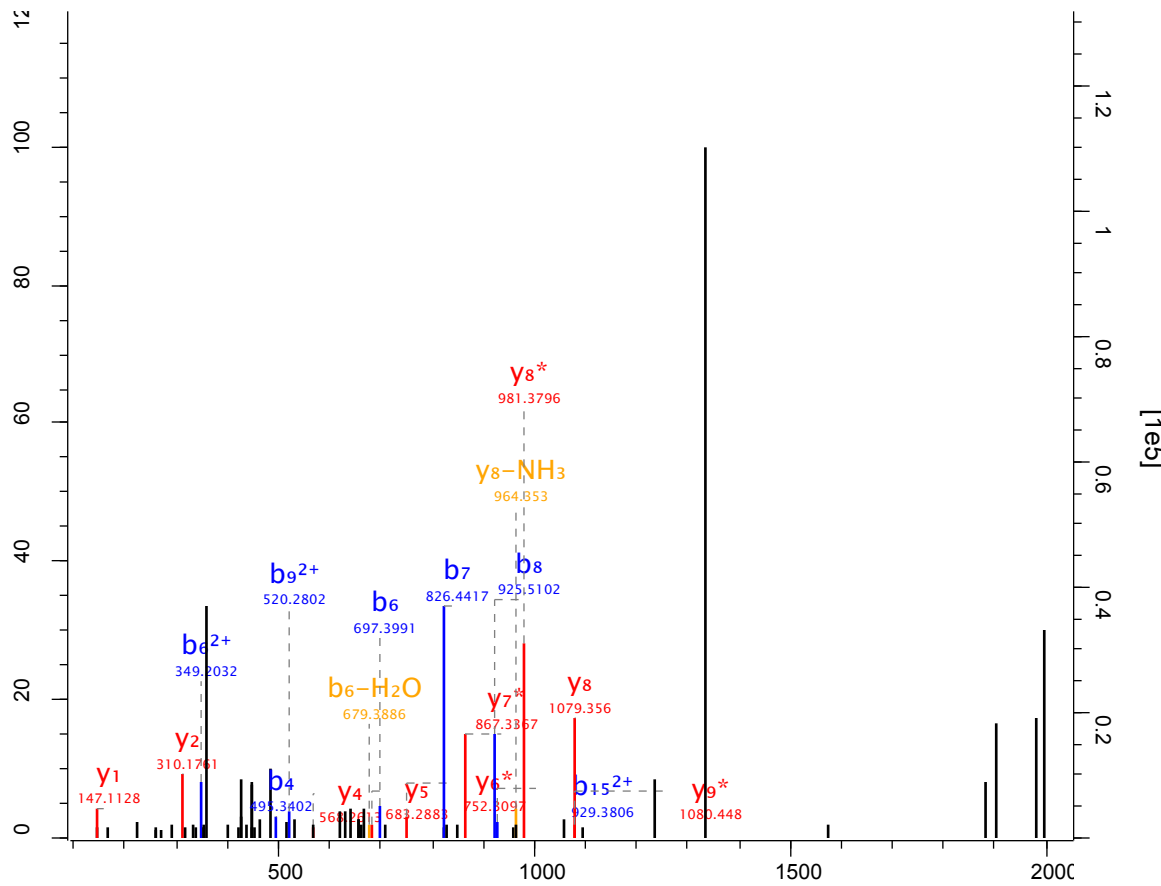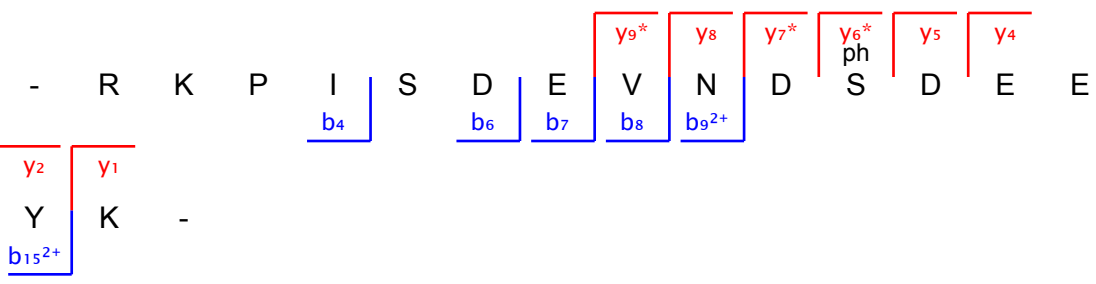

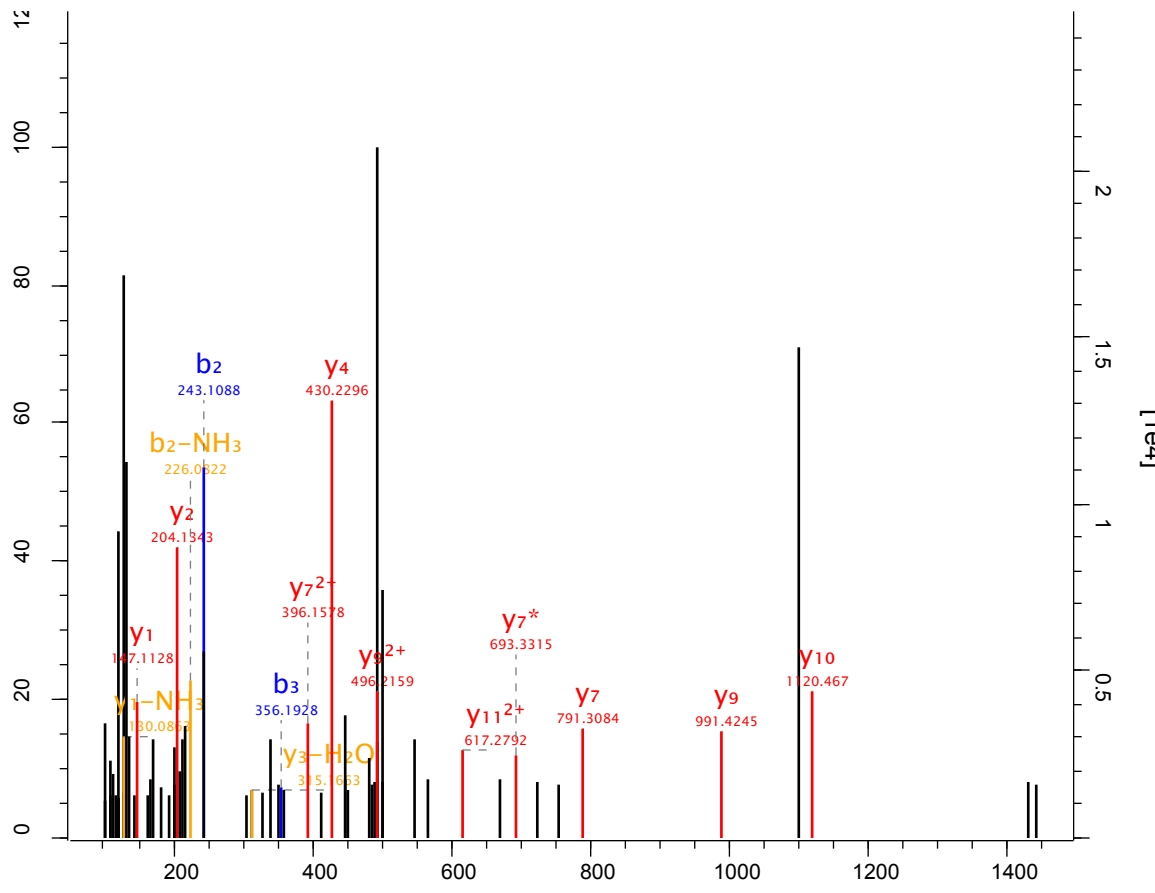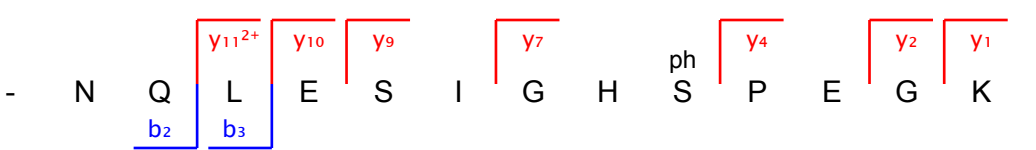



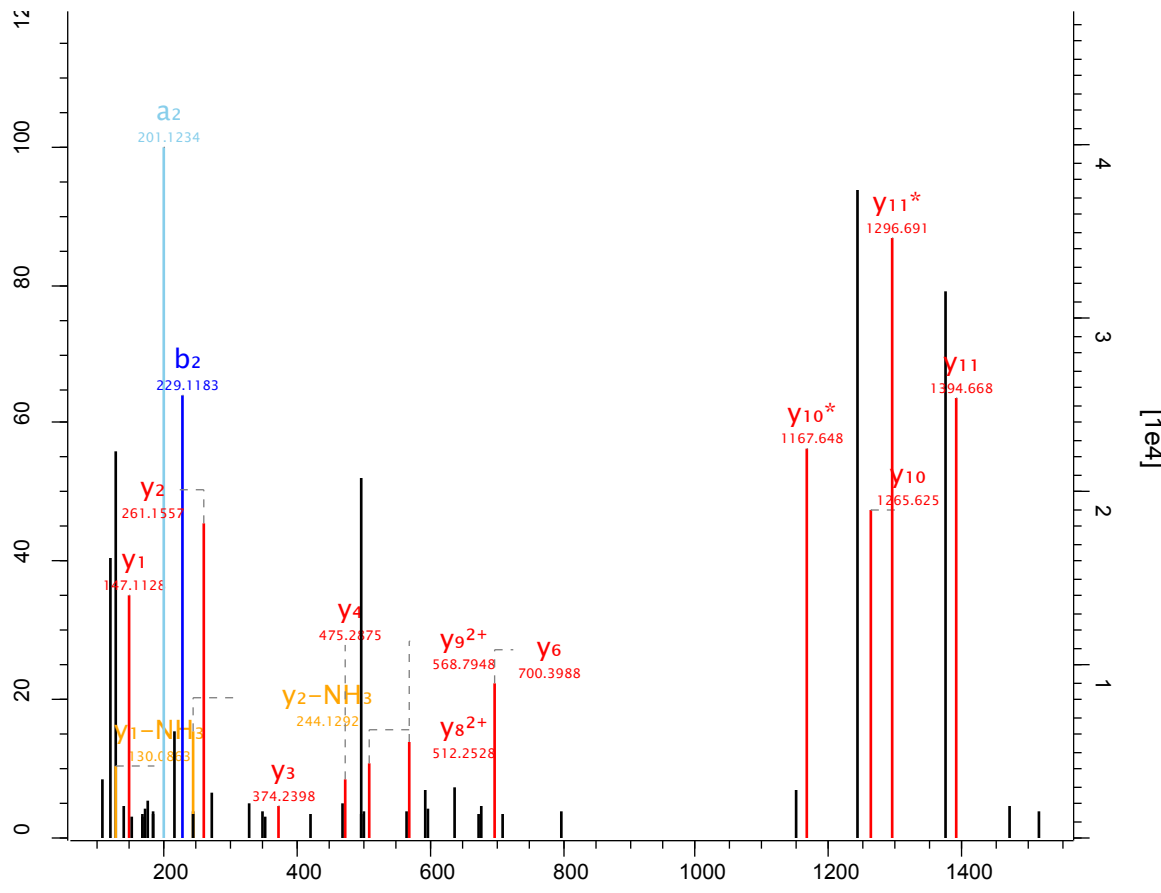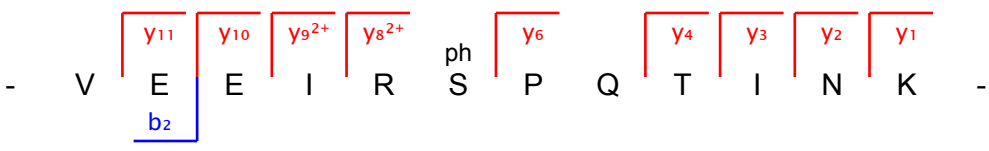

2013\_COL15\_34\_38\_151128201608

5913

FTMS; HCD

145.94

633.75

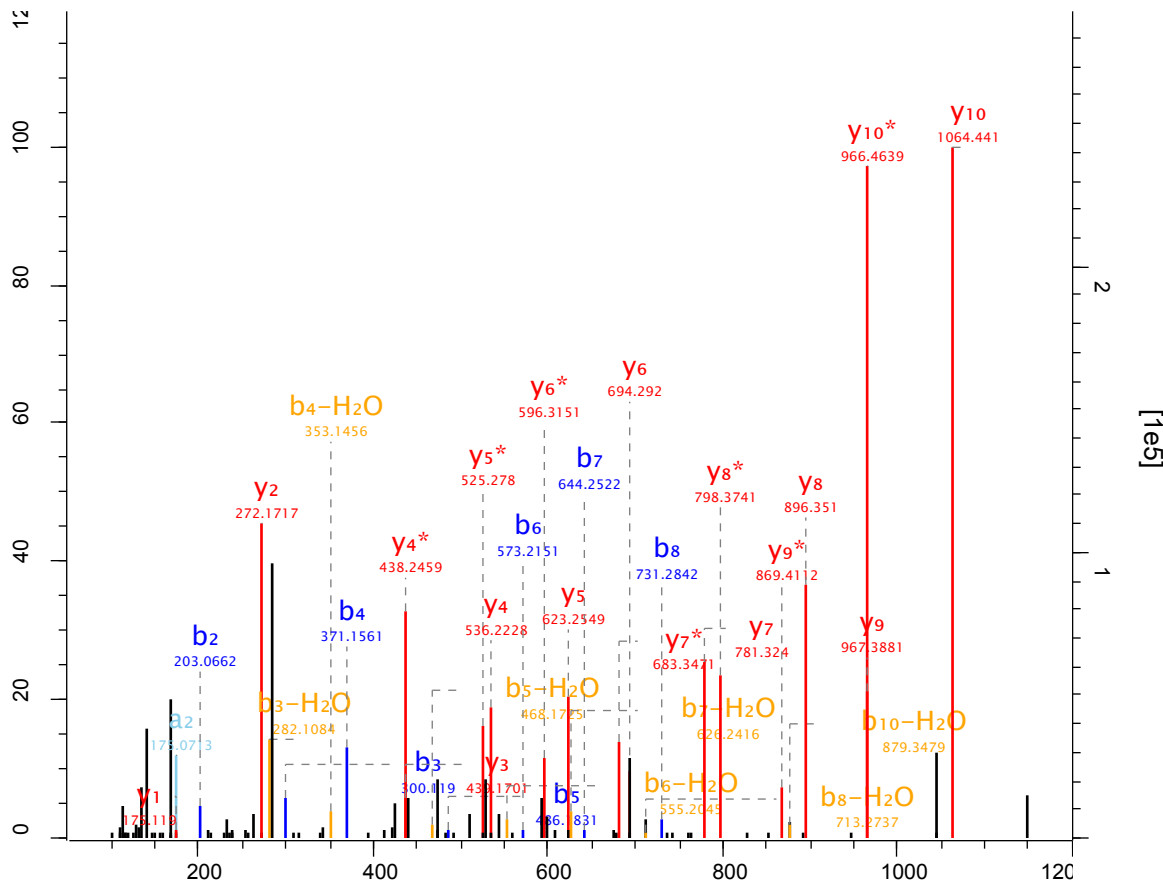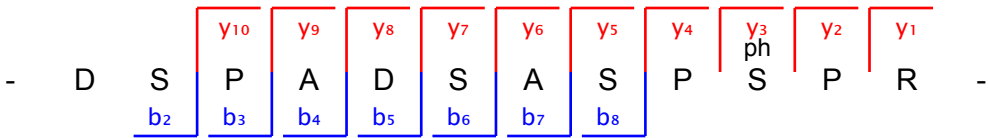

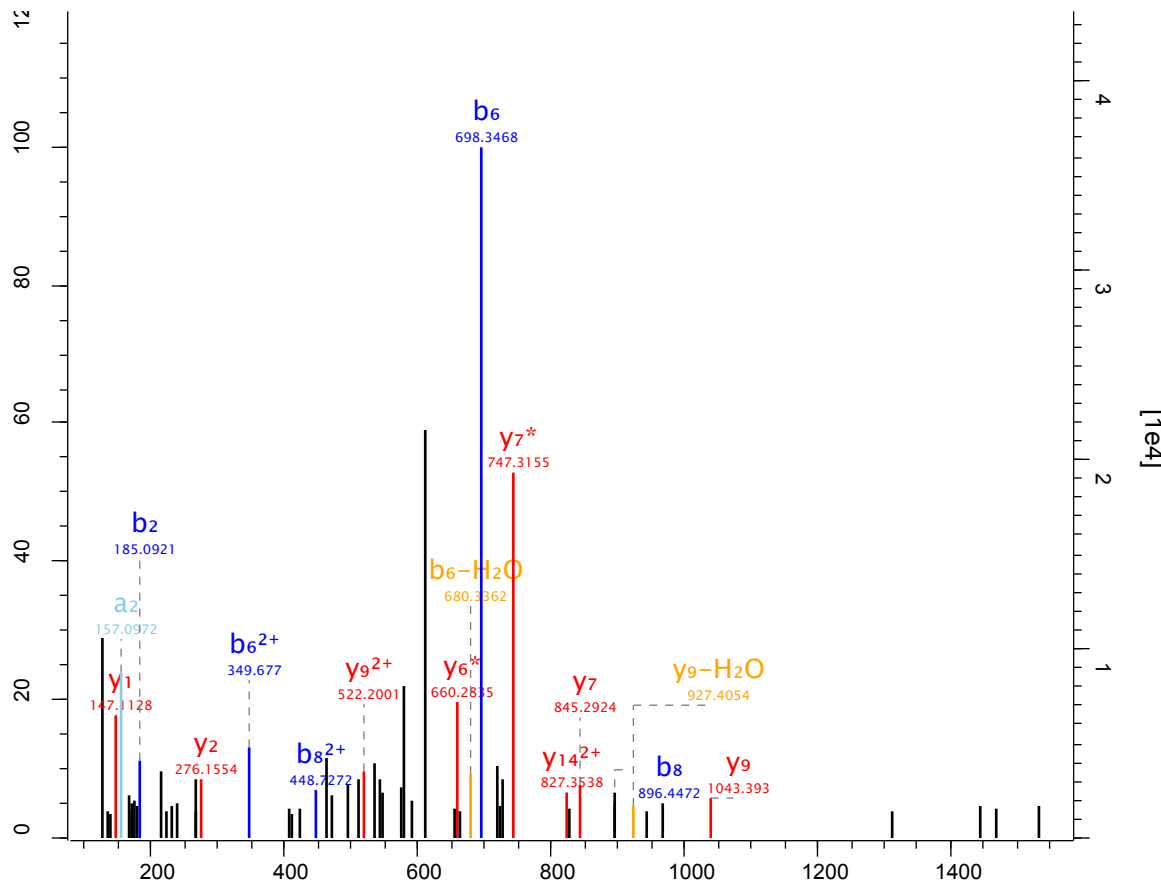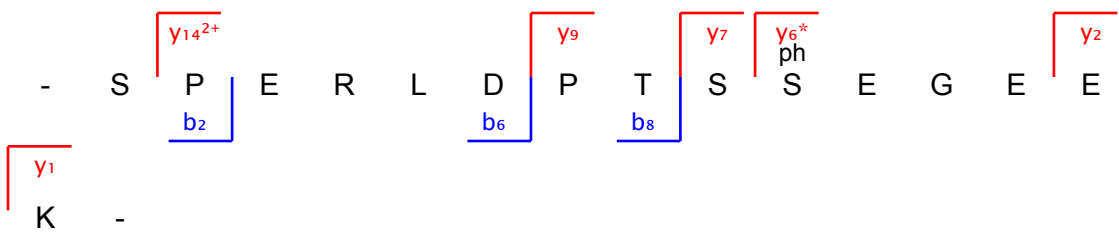

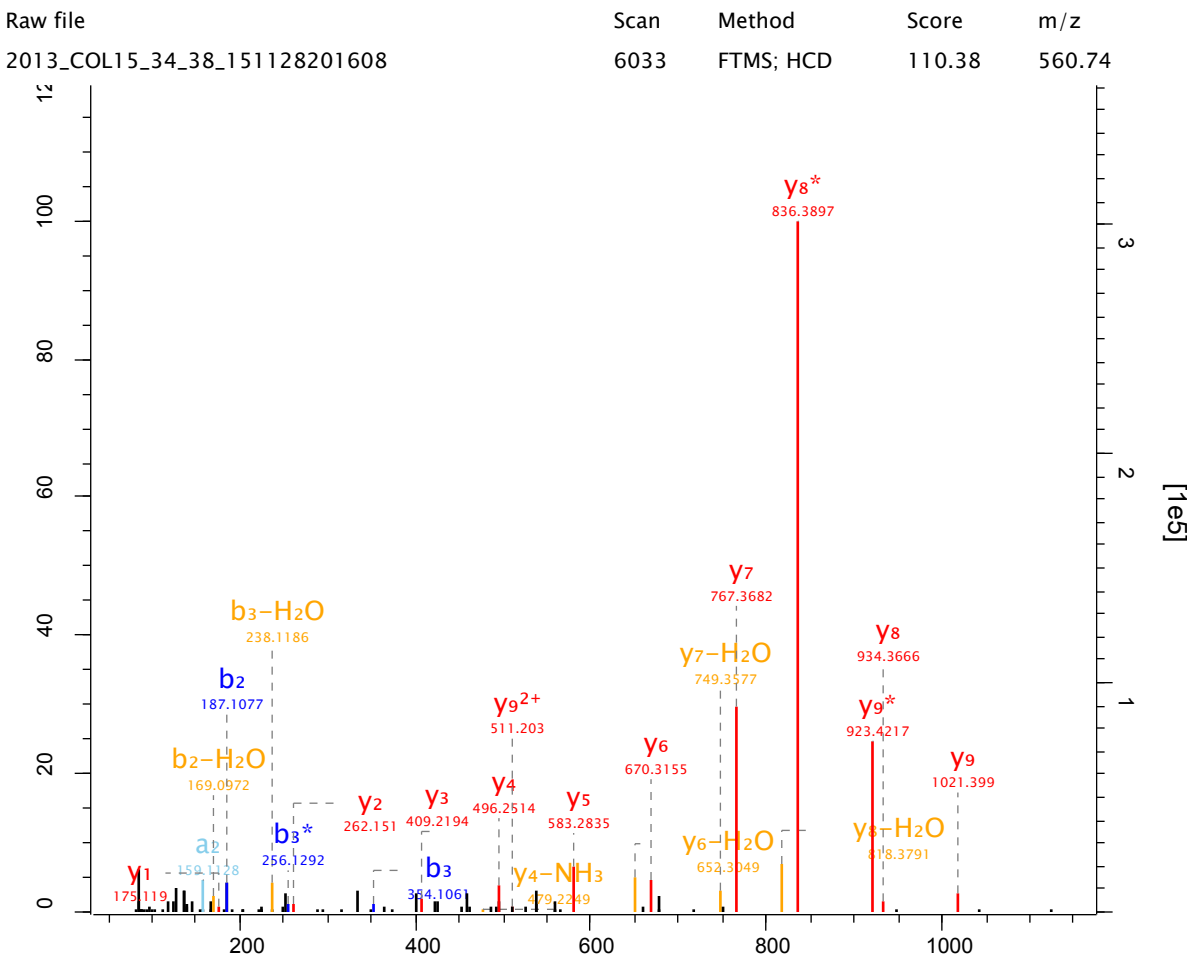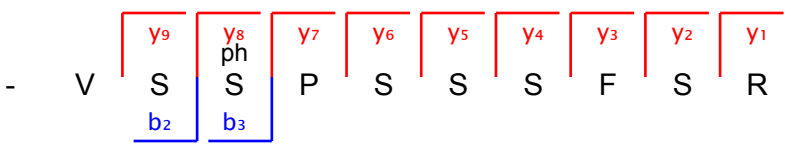

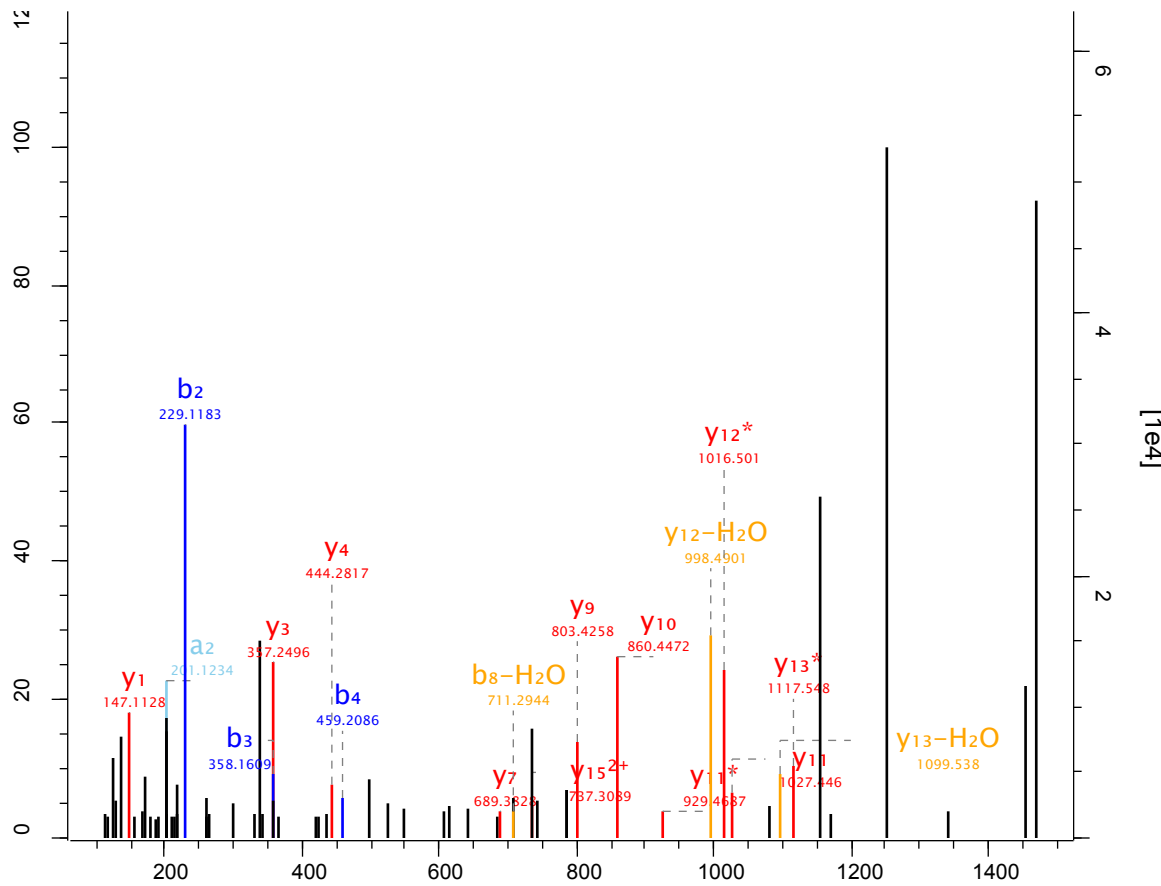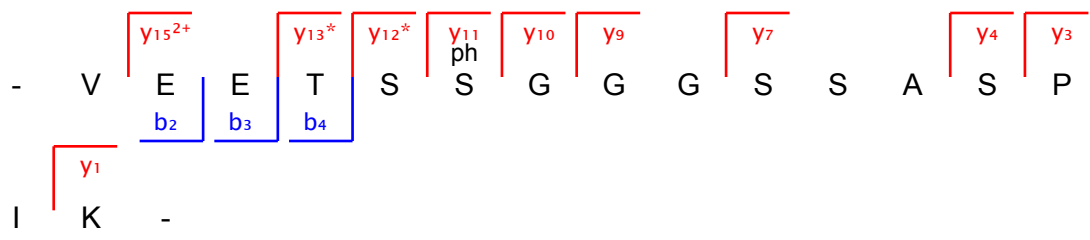

Raw file  
 2013\_COL15\_34\_38\_151128201608

Scan 6150 Method FTMS; HCD Score 49.77 m/z 541.57

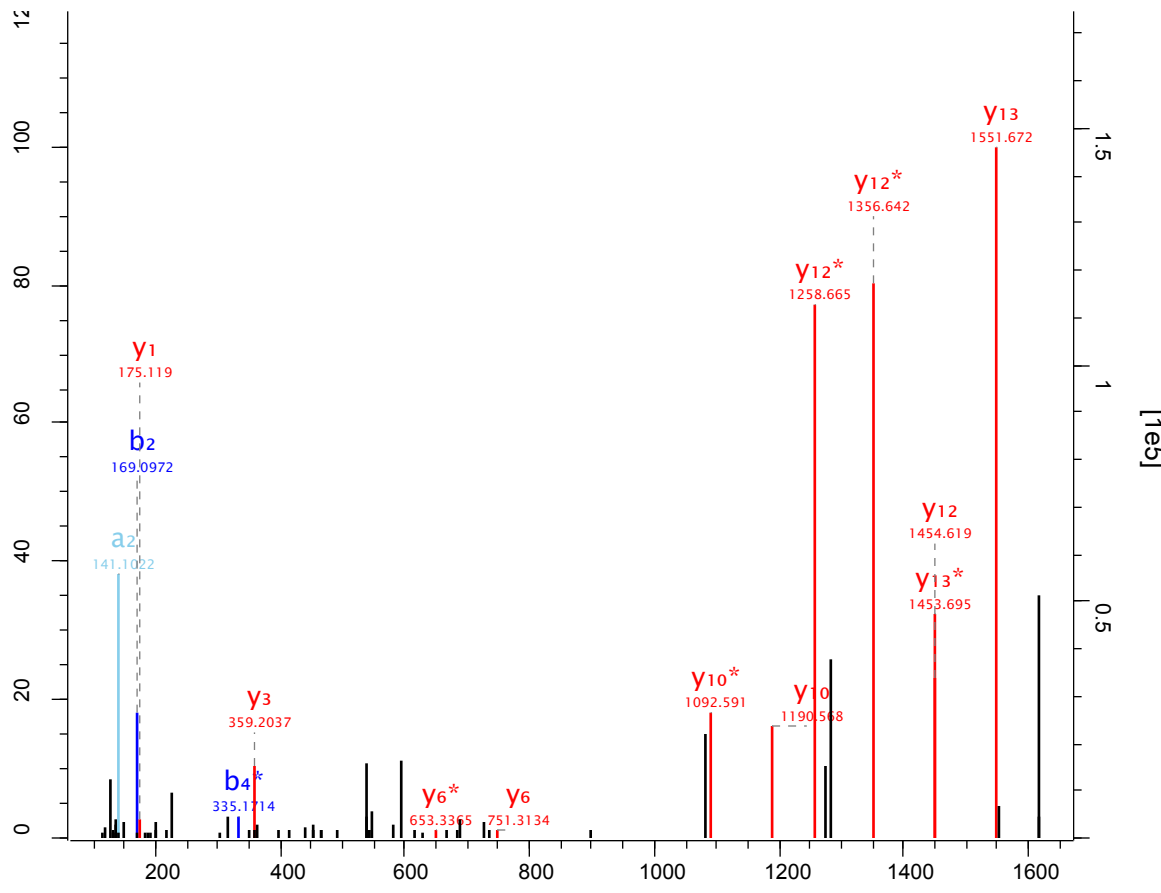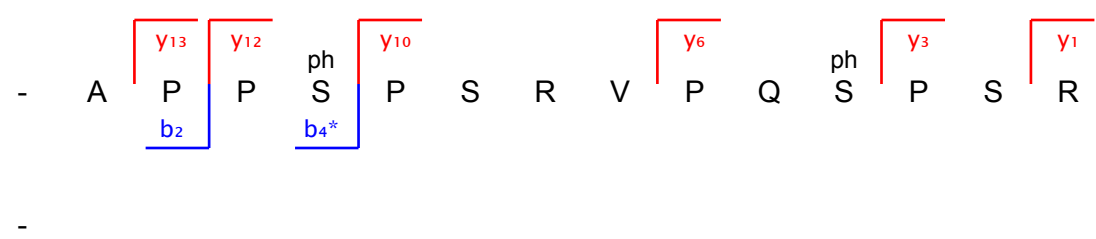

| Raw file                      | Scan | Method    | Score | m/z    |
|-------------------------------|------|-----------|-------|--------|
| 2013_COL15_34_38_151128201608 | 6169 | FTMS; HCD | 57.53 | 730.31 |

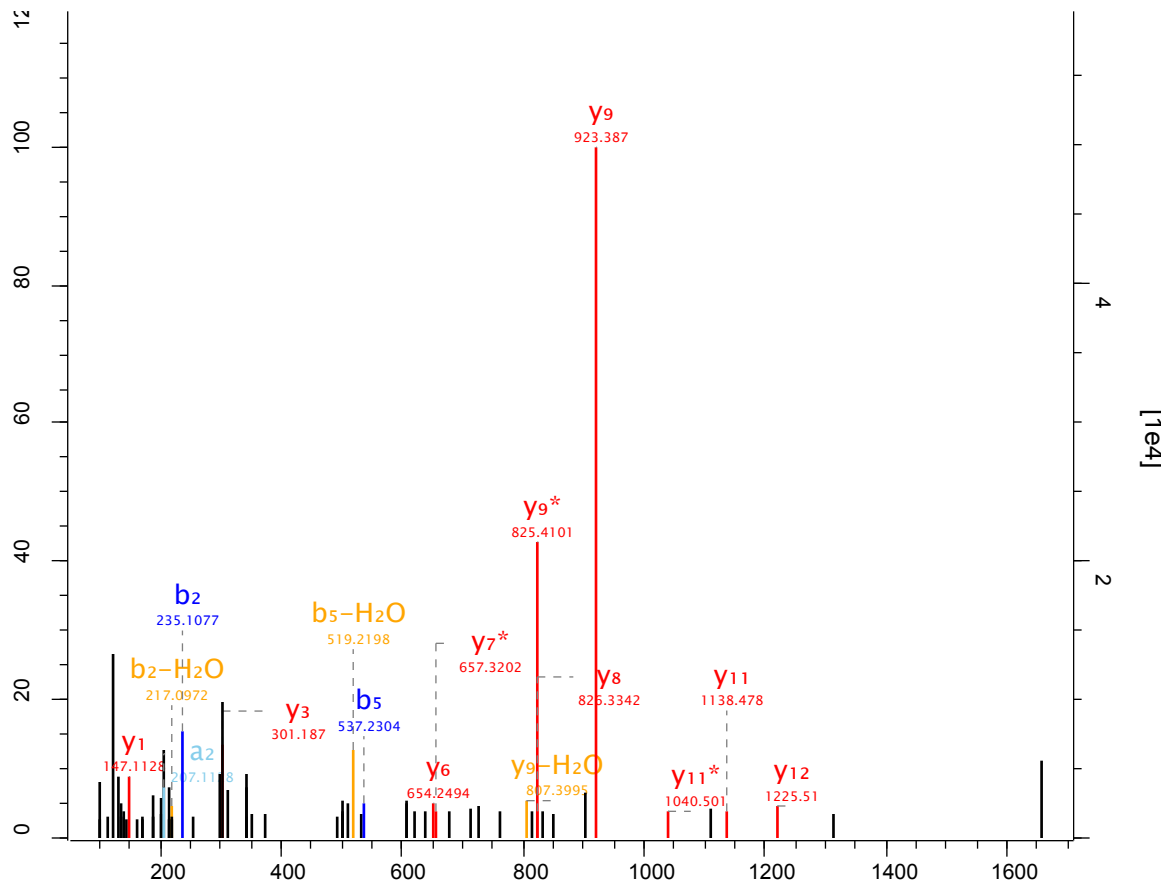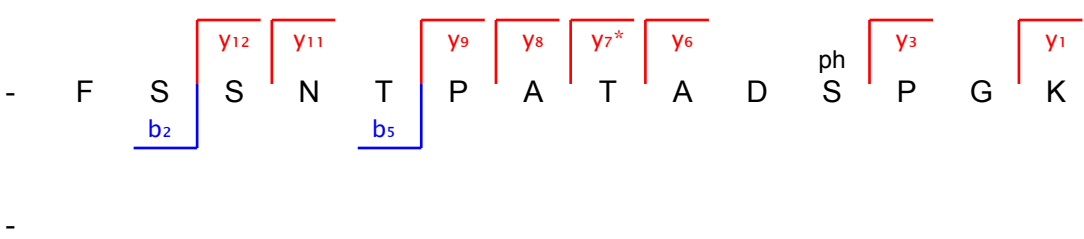

2013\_COL15\_34\_38\_151128201608

6301

FTMS; HCD

61.34

725.28

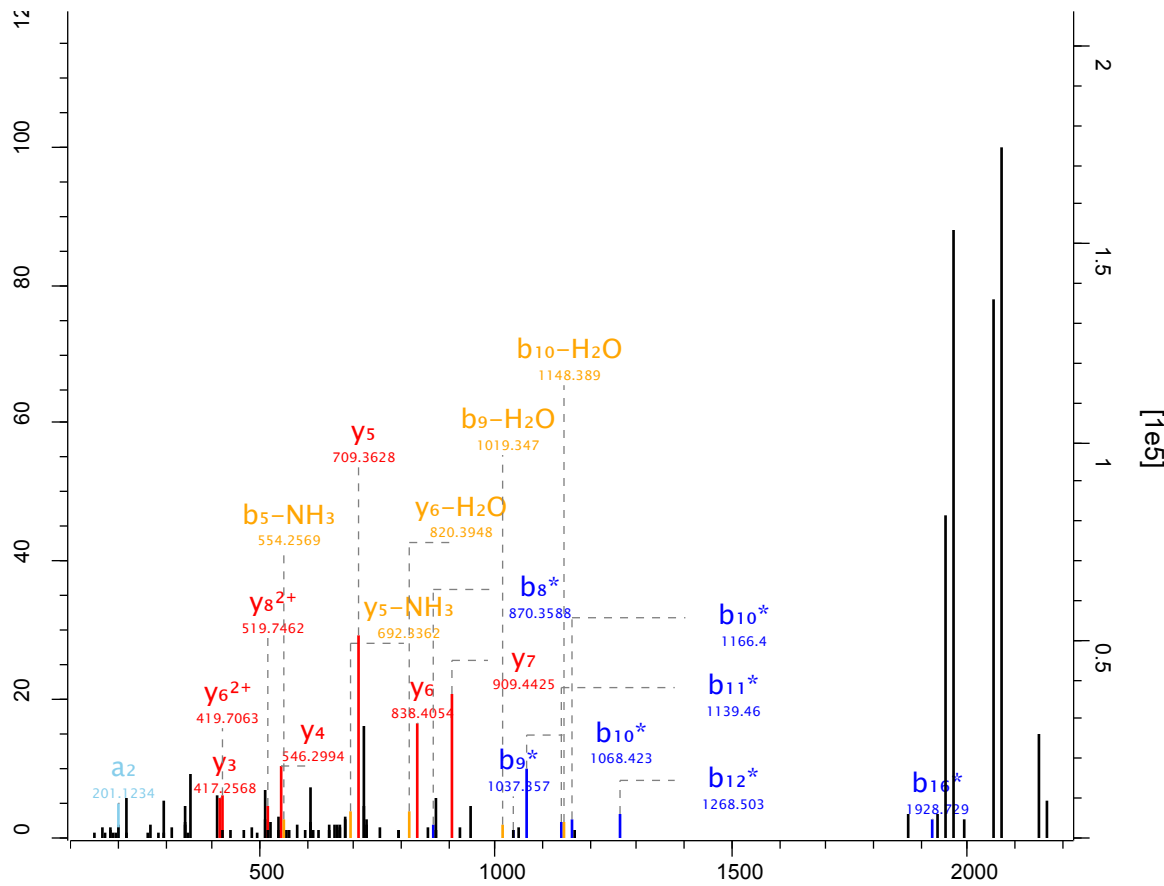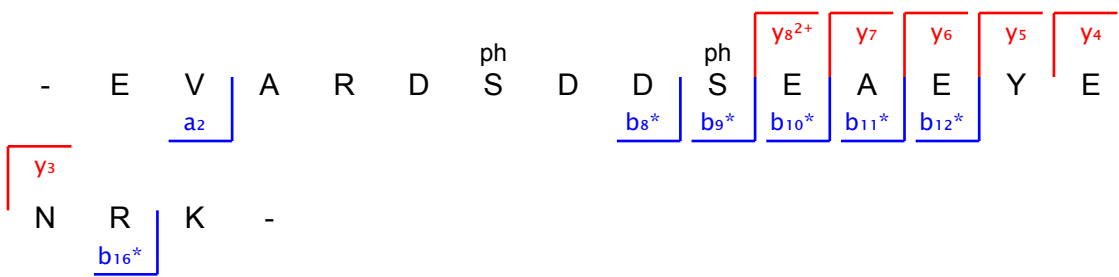



Raw file 2013\_COL15\_34\_38\_151128201608 Scan 6401 Method FTMS; HCD Score 87.68 m/z 786.32

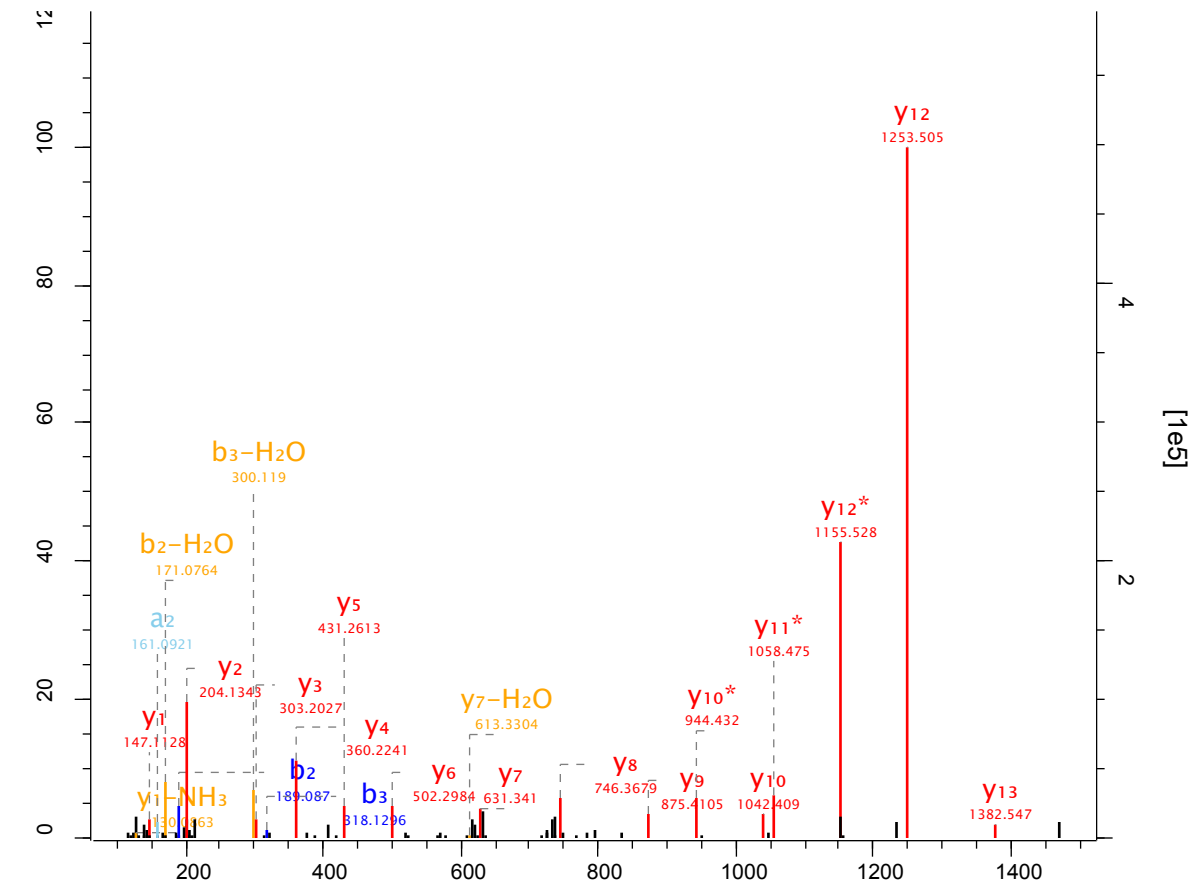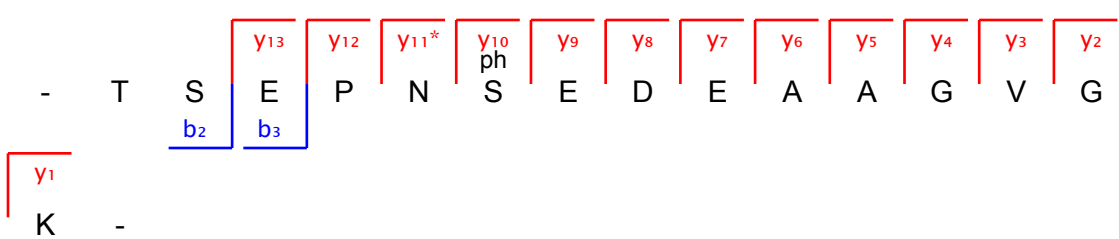

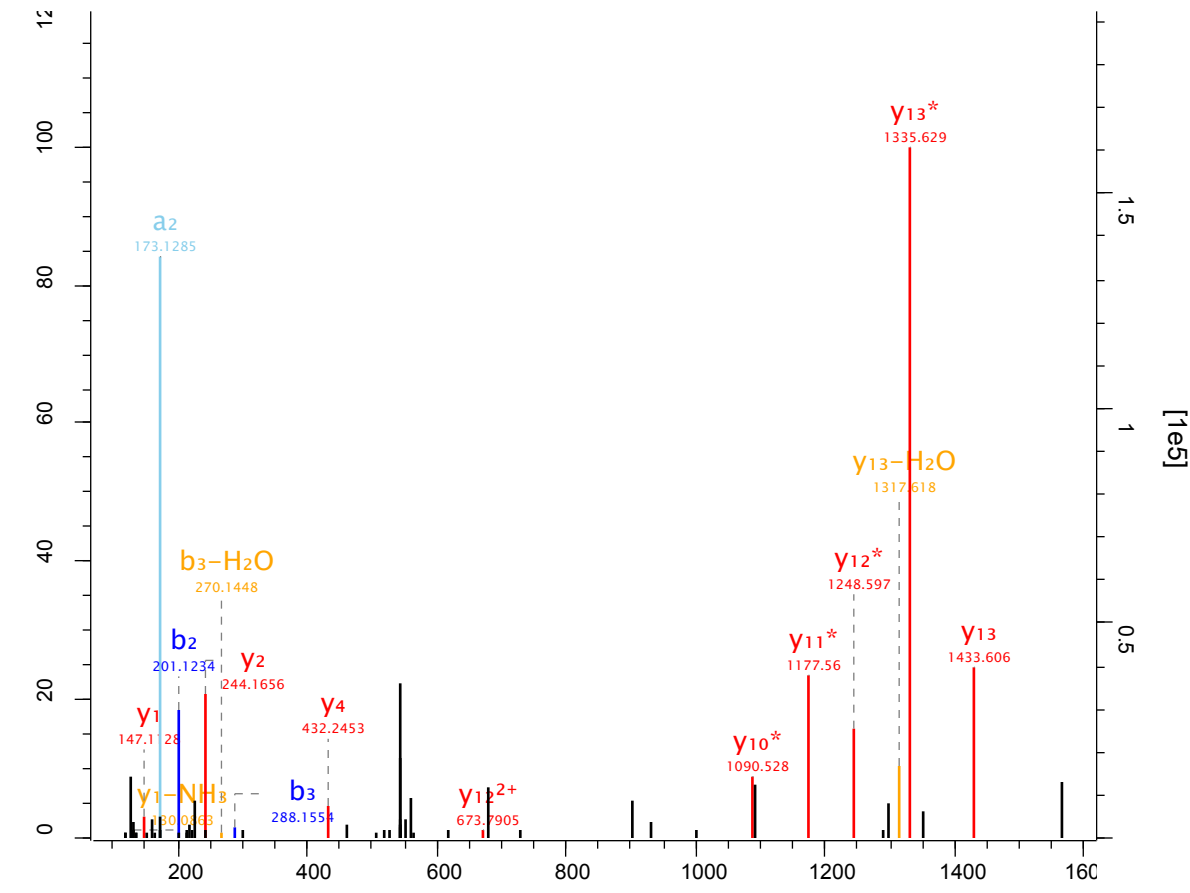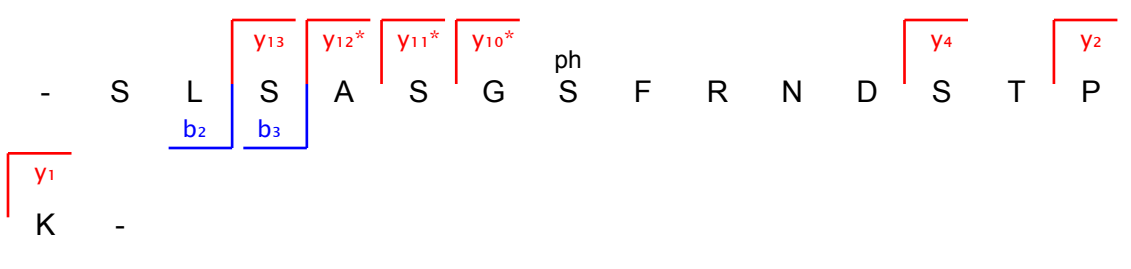

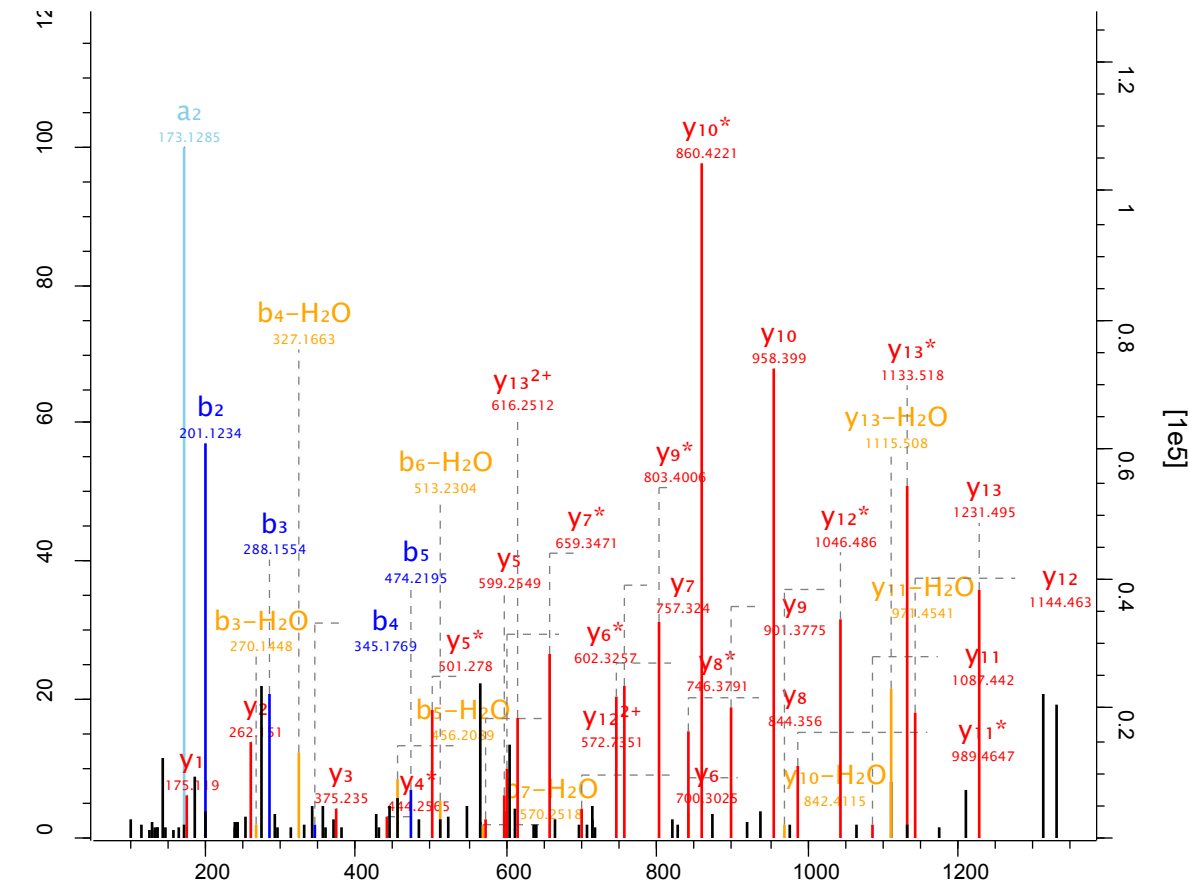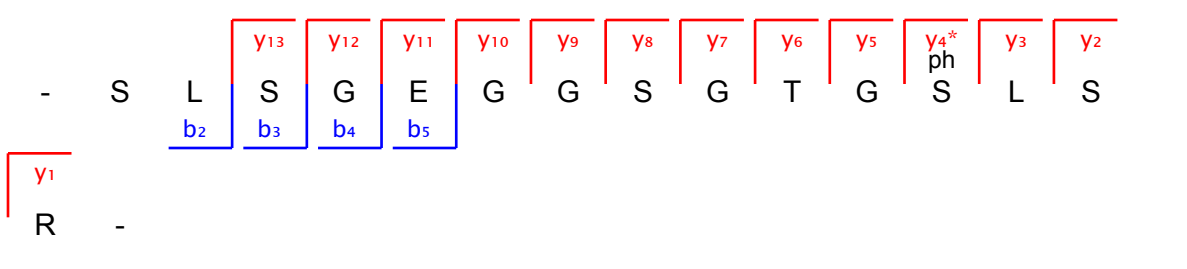

| Raw file                      | Scan | Method    | Score  | m/z    |
|-------------------------------|------|-----------|--------|--------|
| 2013_COL15_34_38_151128201608 | 6624 | FTMS; HCD | 107.74 | 423.54 |

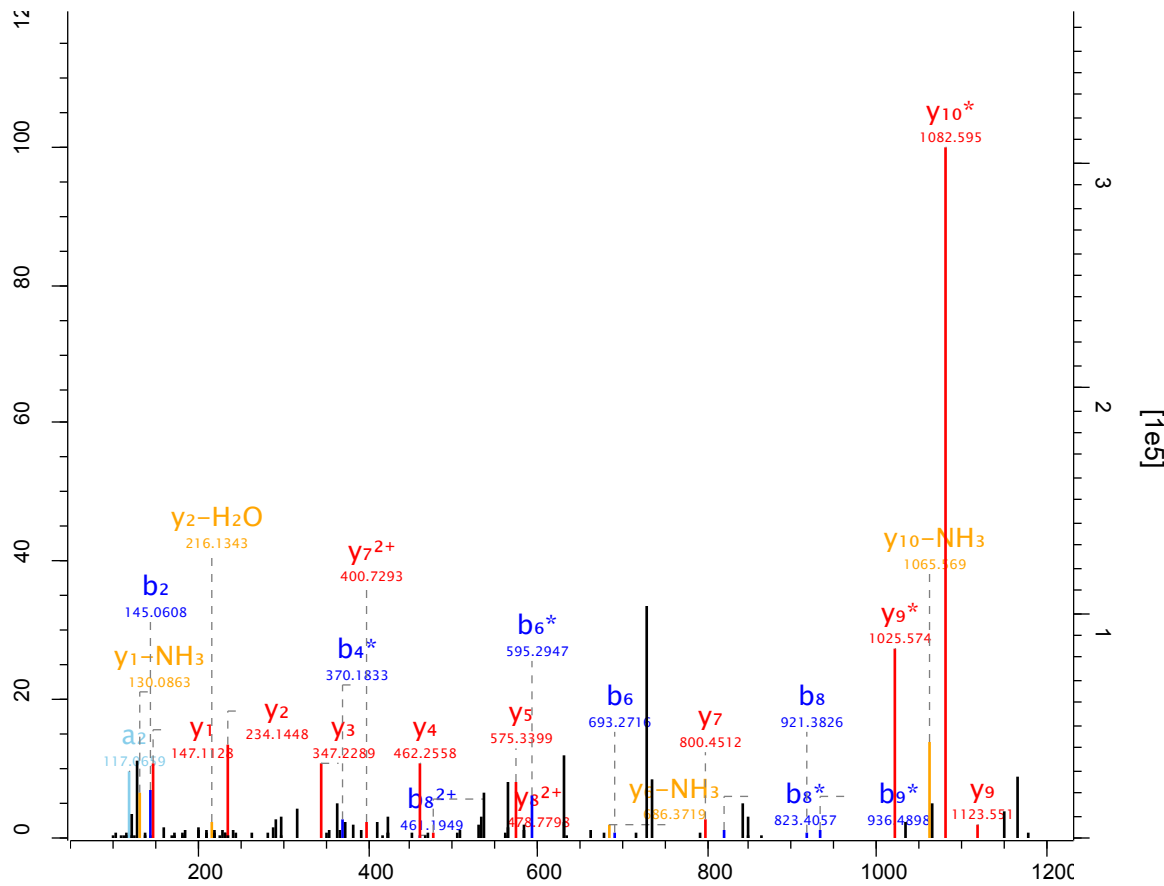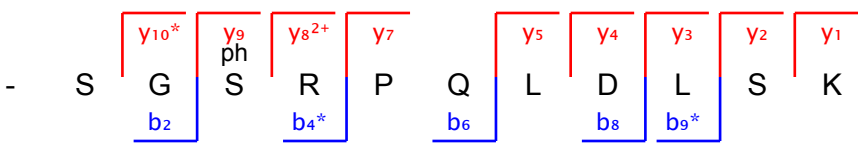

| Raw file                      | Scan | Method    | Score  | m/z    |
|-------------------------------|------|-----------|--------|--------|
| 2013_COL15_34_38_151128201608 | 6655 | FTMS; HCD | 104.67 | 649.27 |

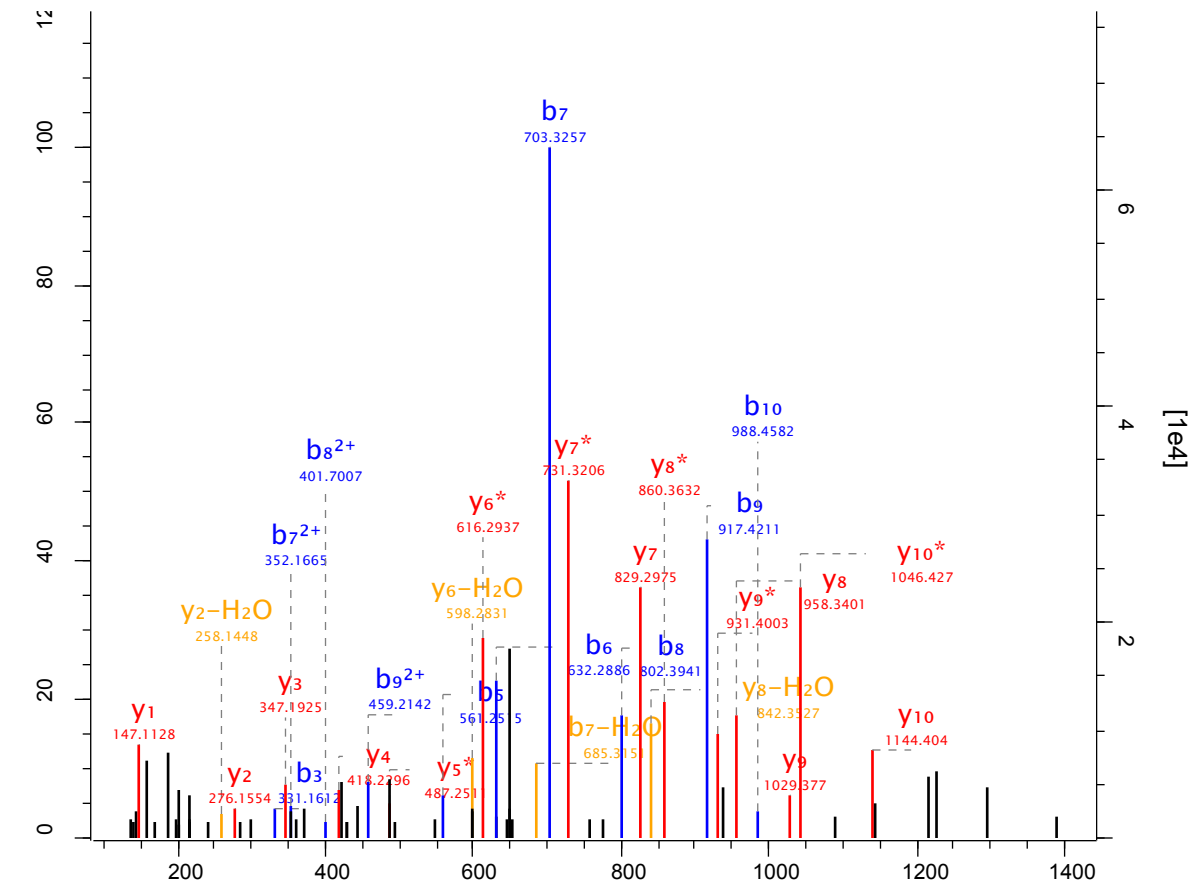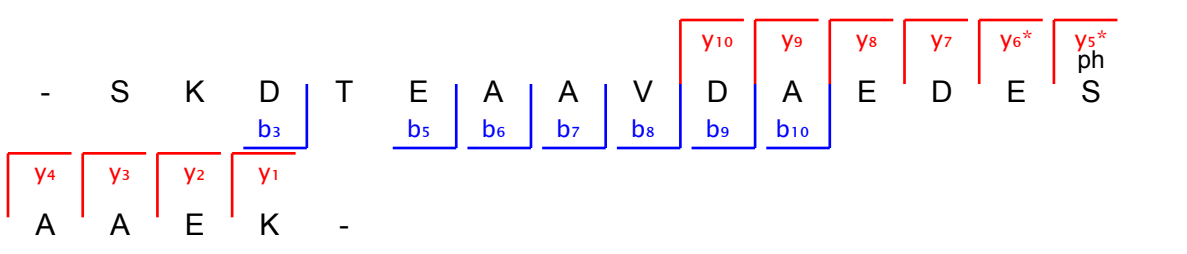

2013\_COL15\_34\_38\_151128201608

6659

FTMS; HCD

82.59

501.22

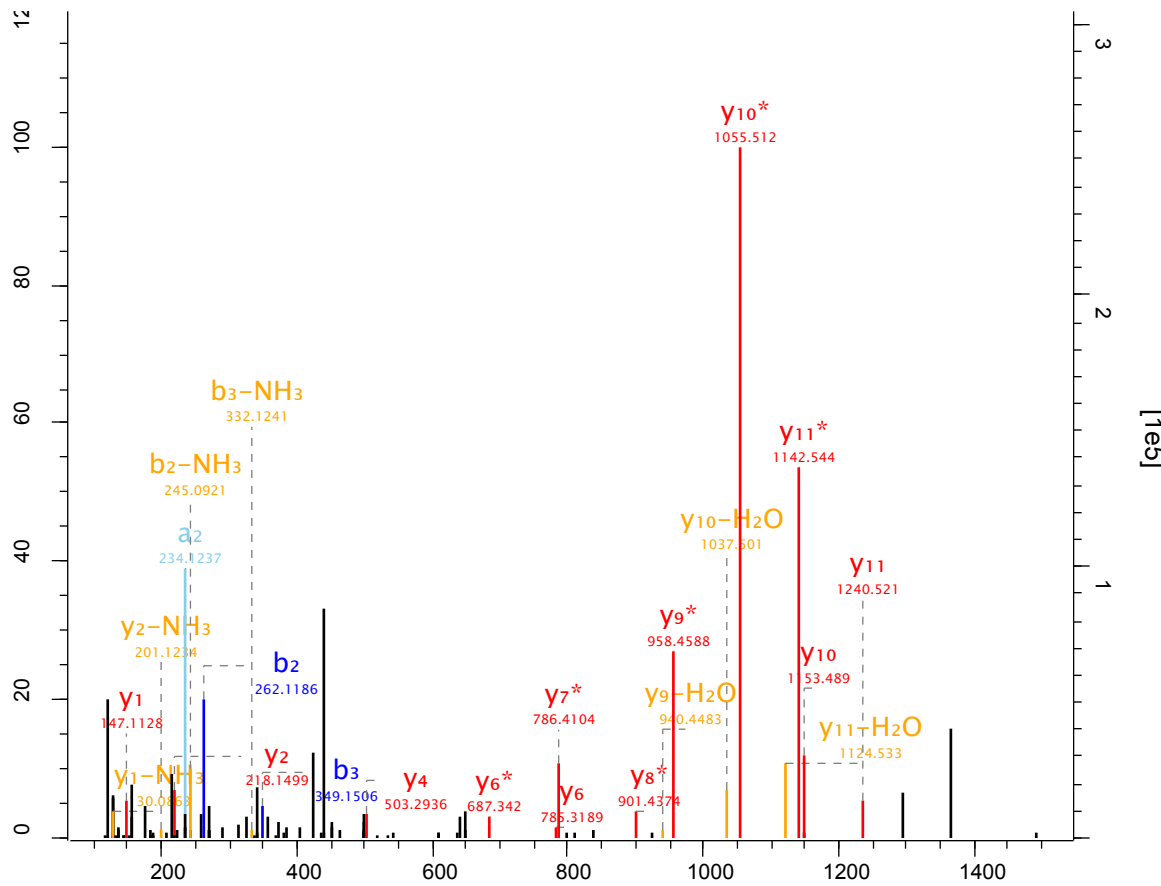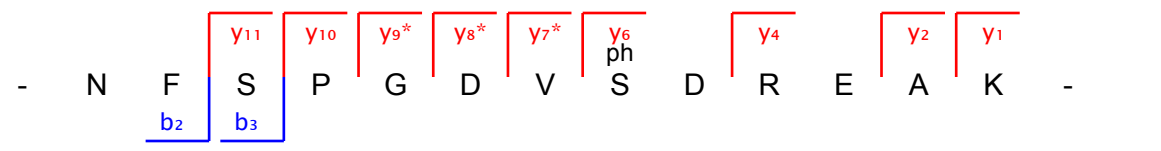

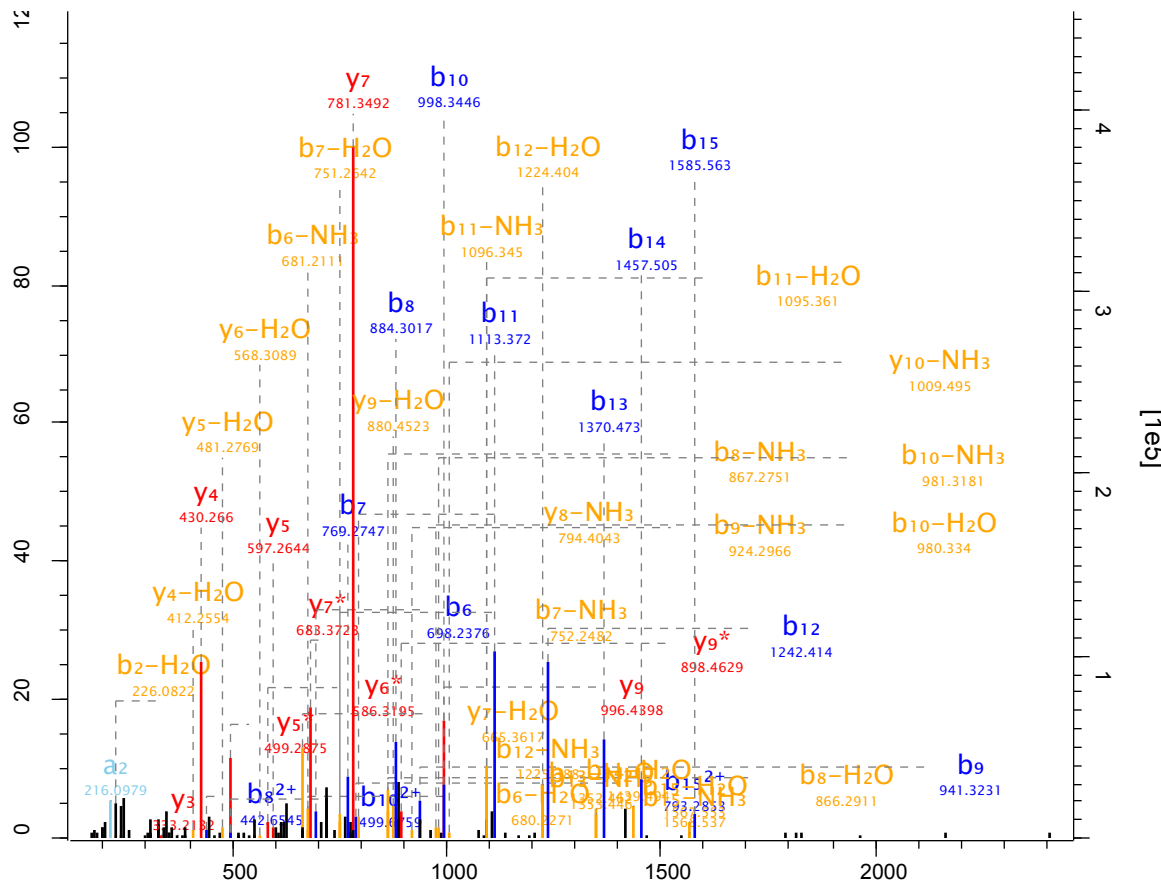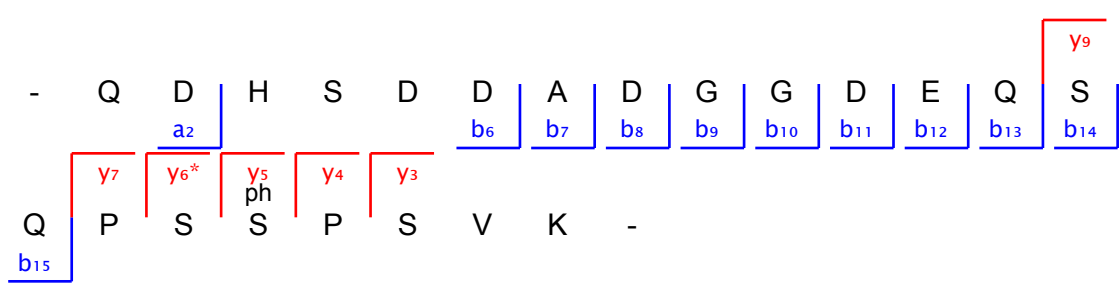

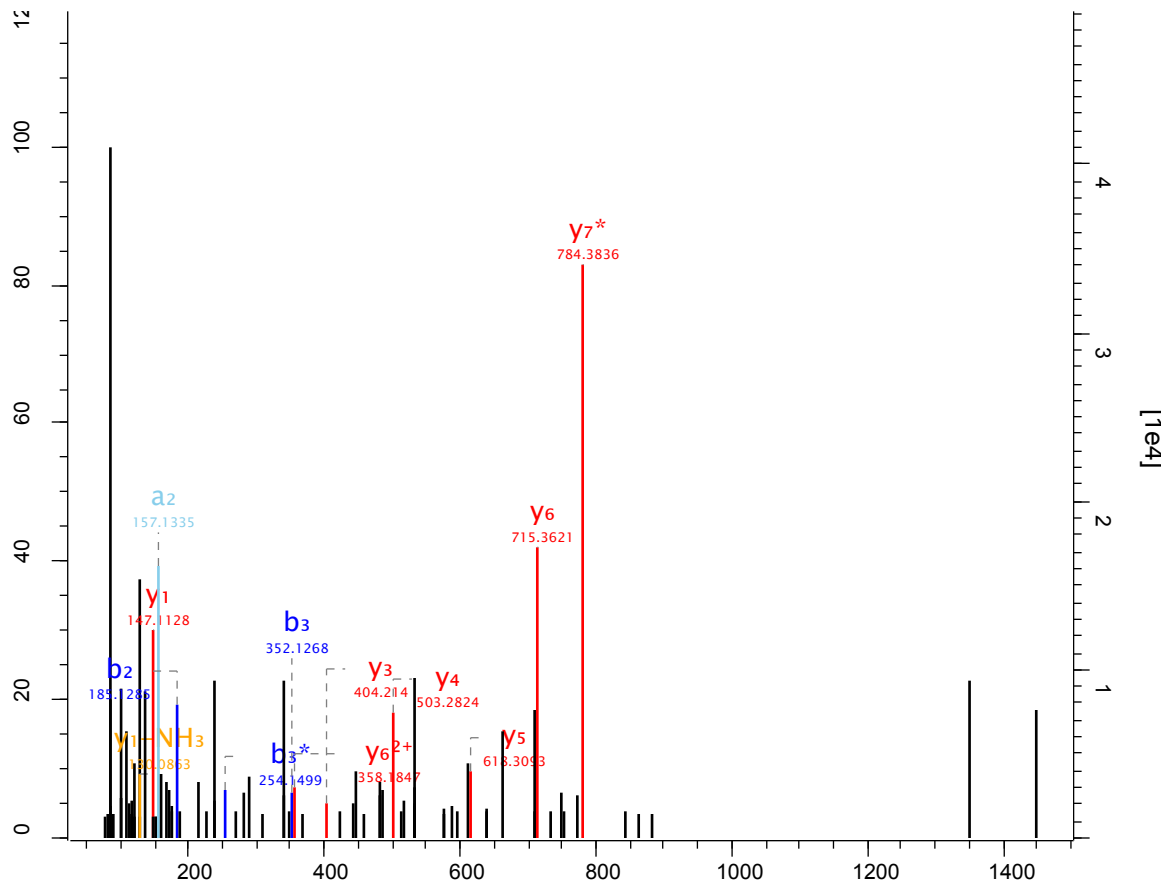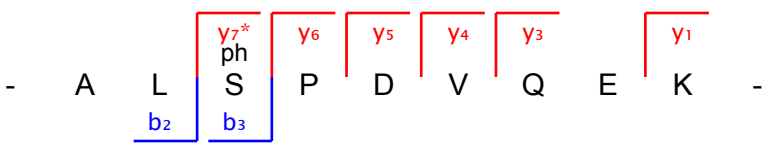



2013\_COL15\_34\_38\_151128201608

6797

FTMS; HCD

166.86

619.25

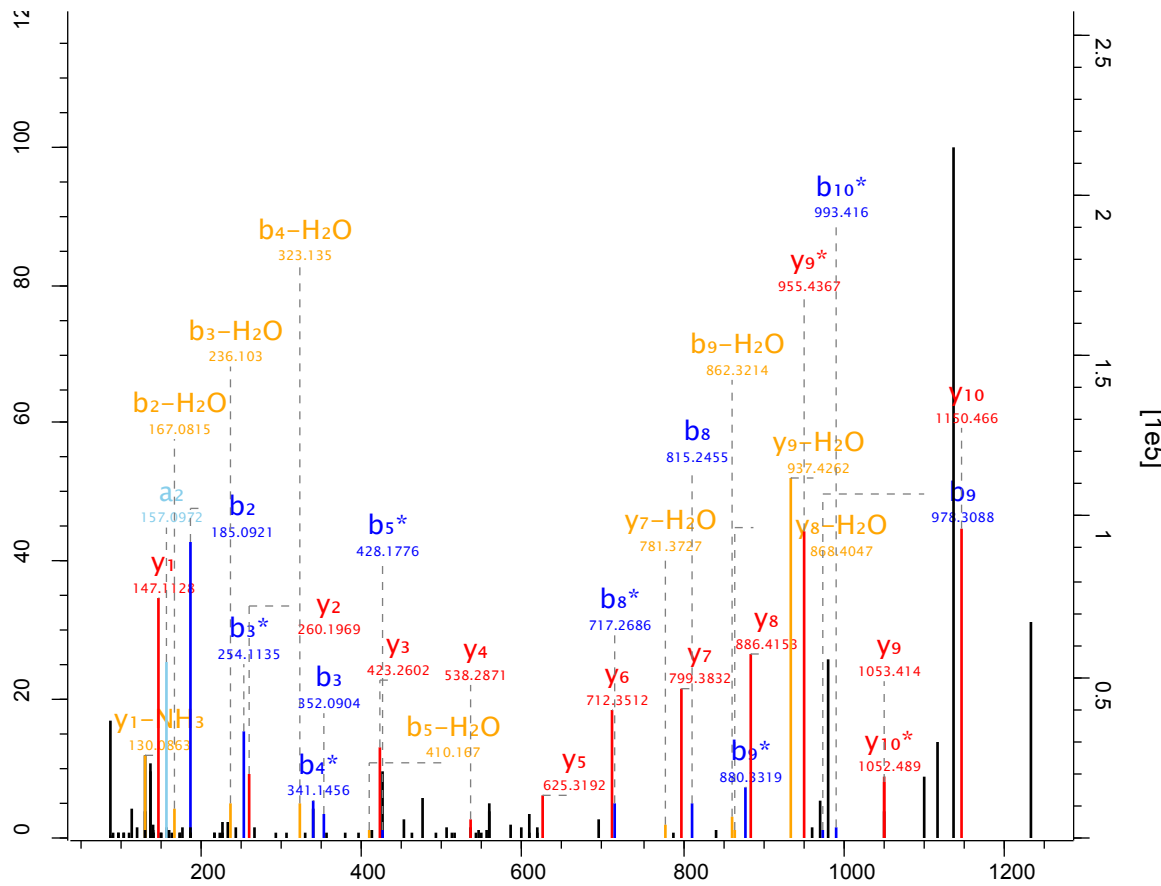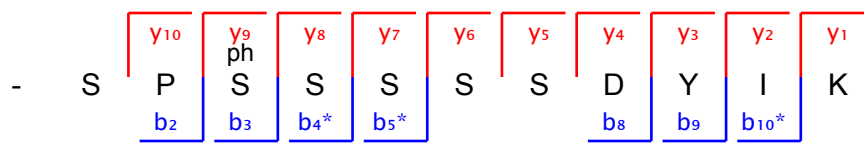

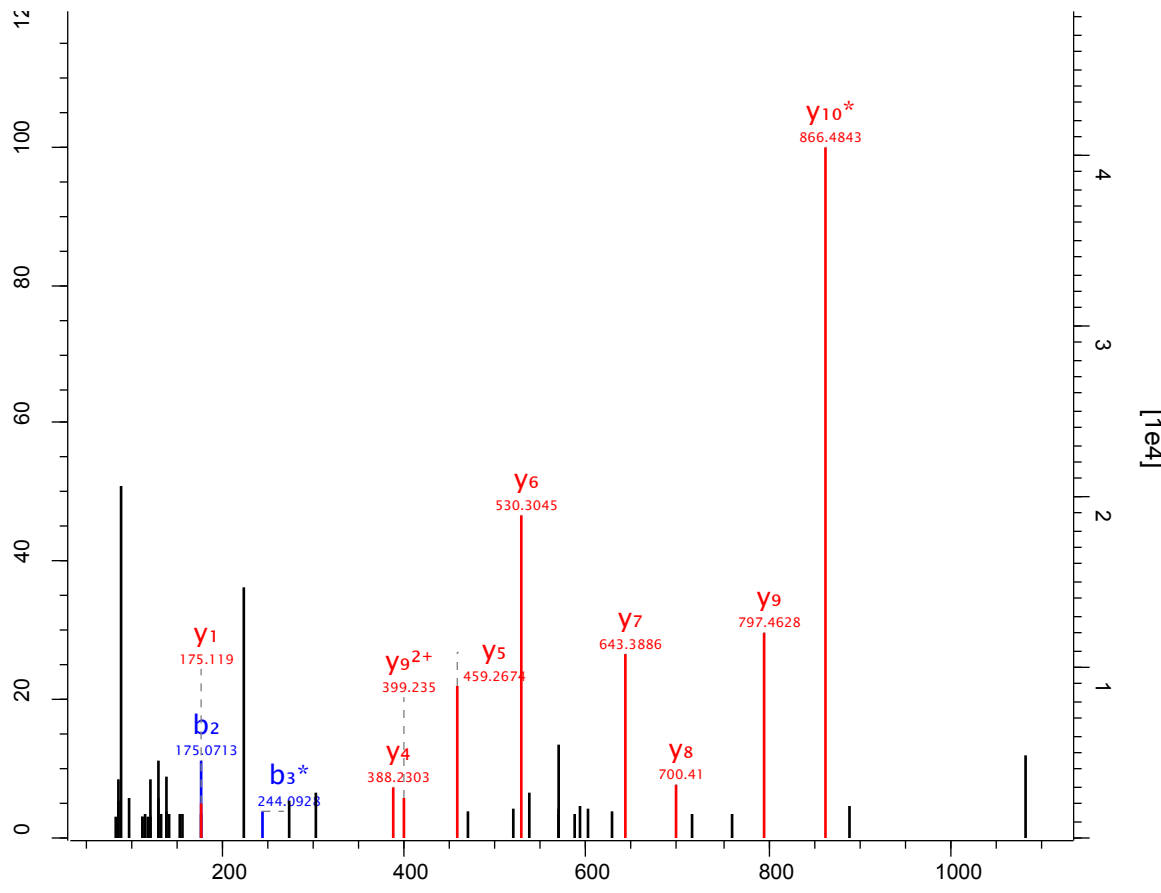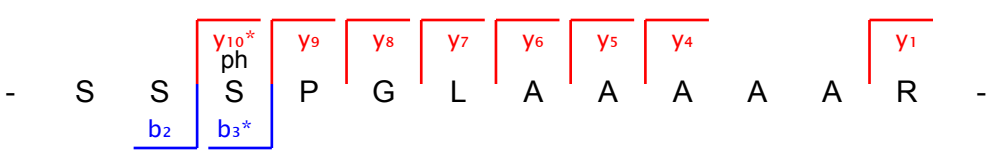

2013\_COL15\_34\_38\_151128201608

7105

FTMS; HCD

46.42

651.62

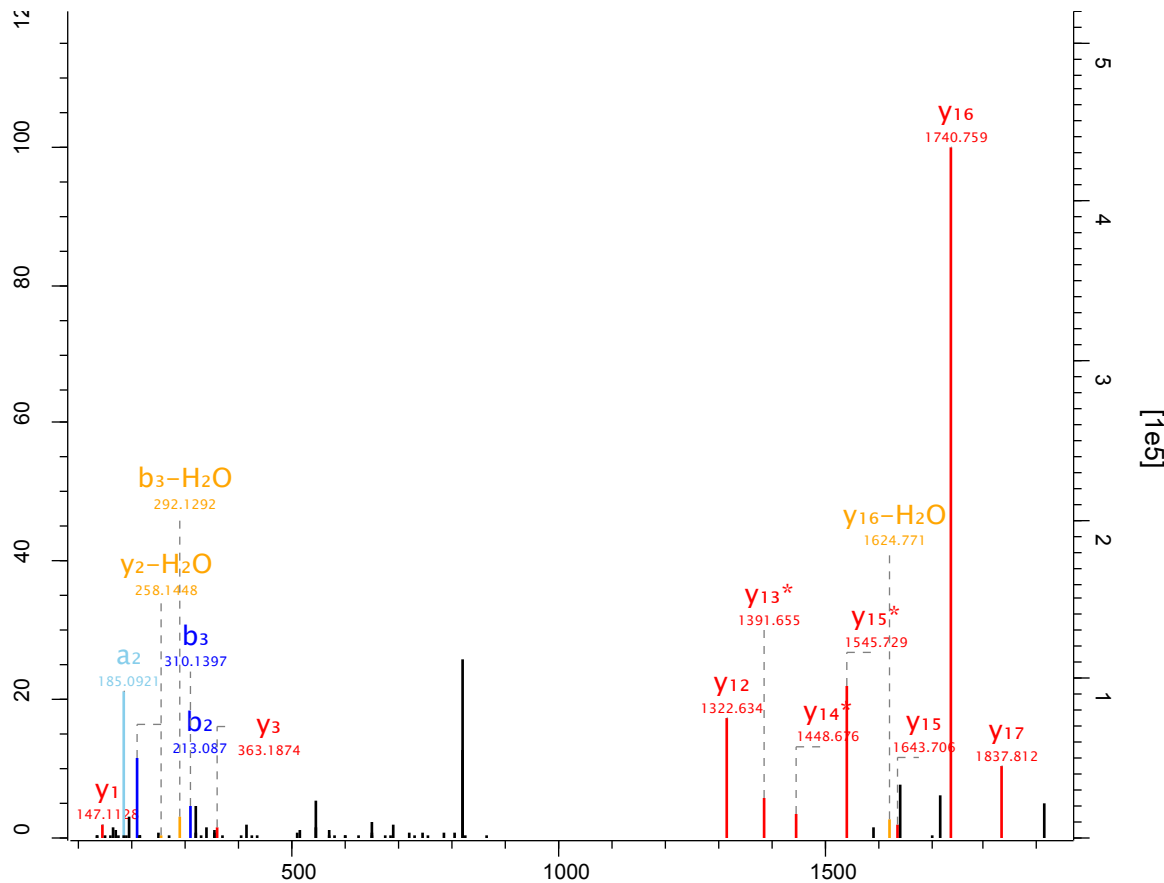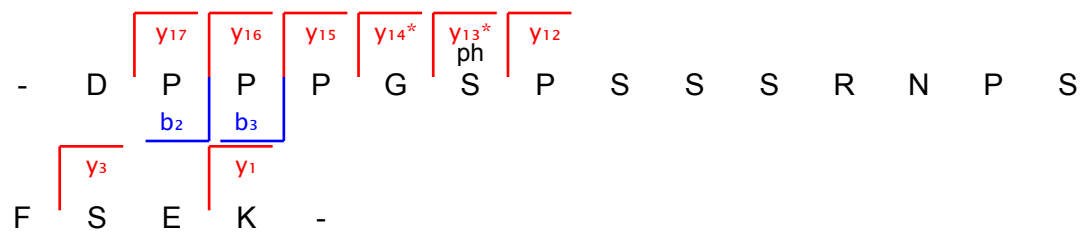

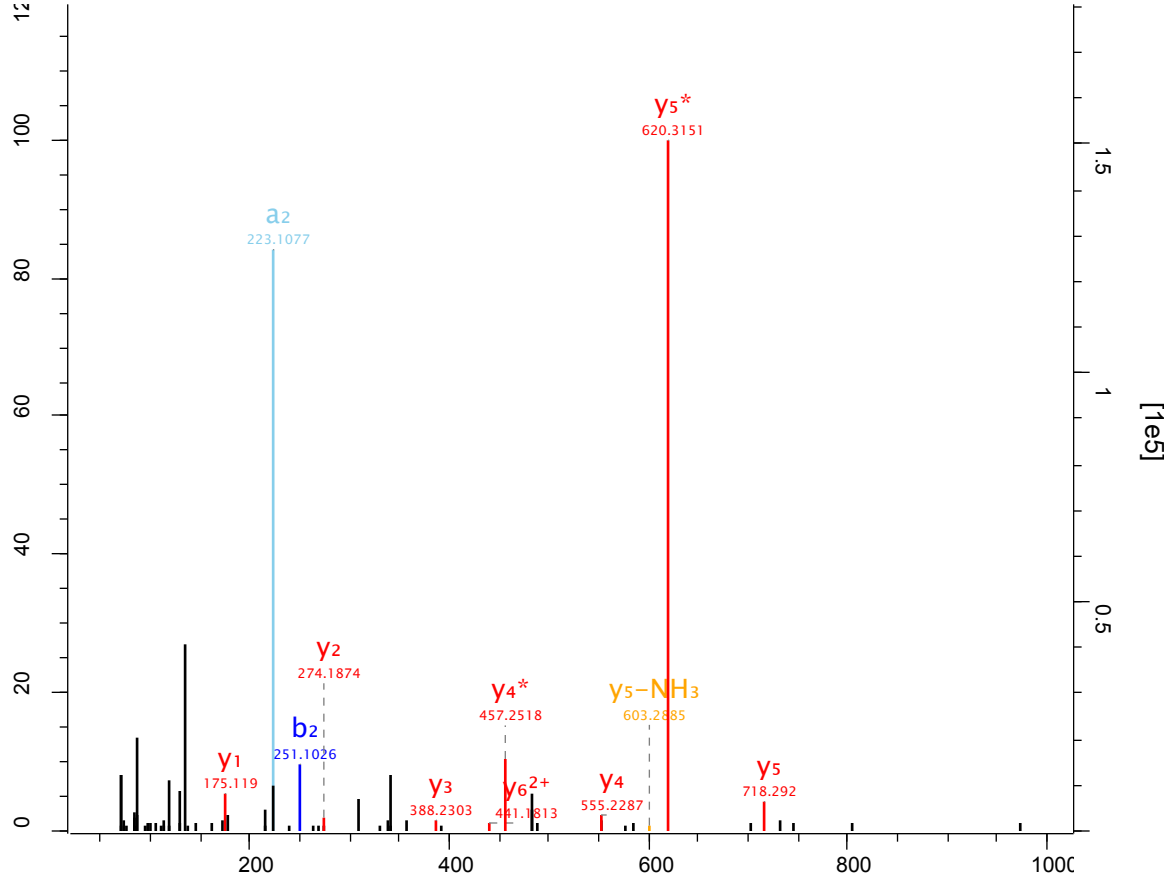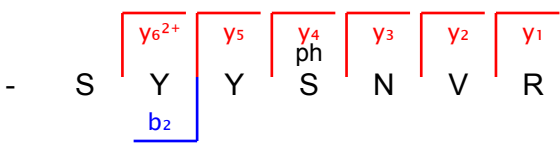

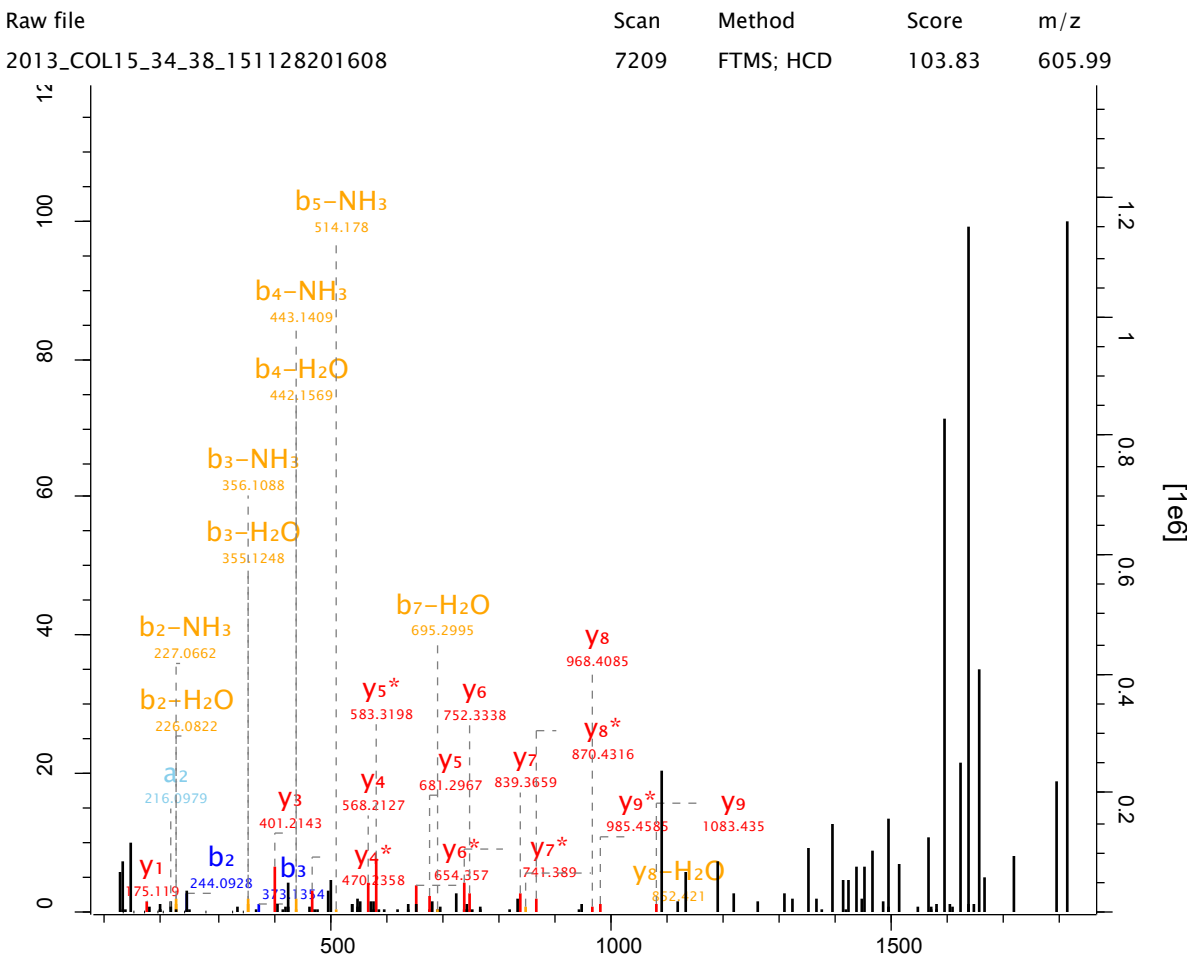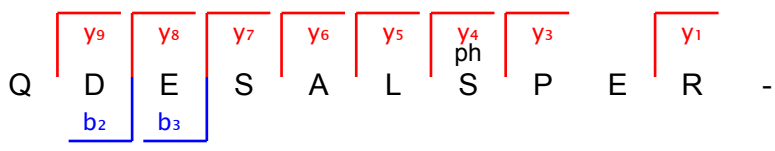

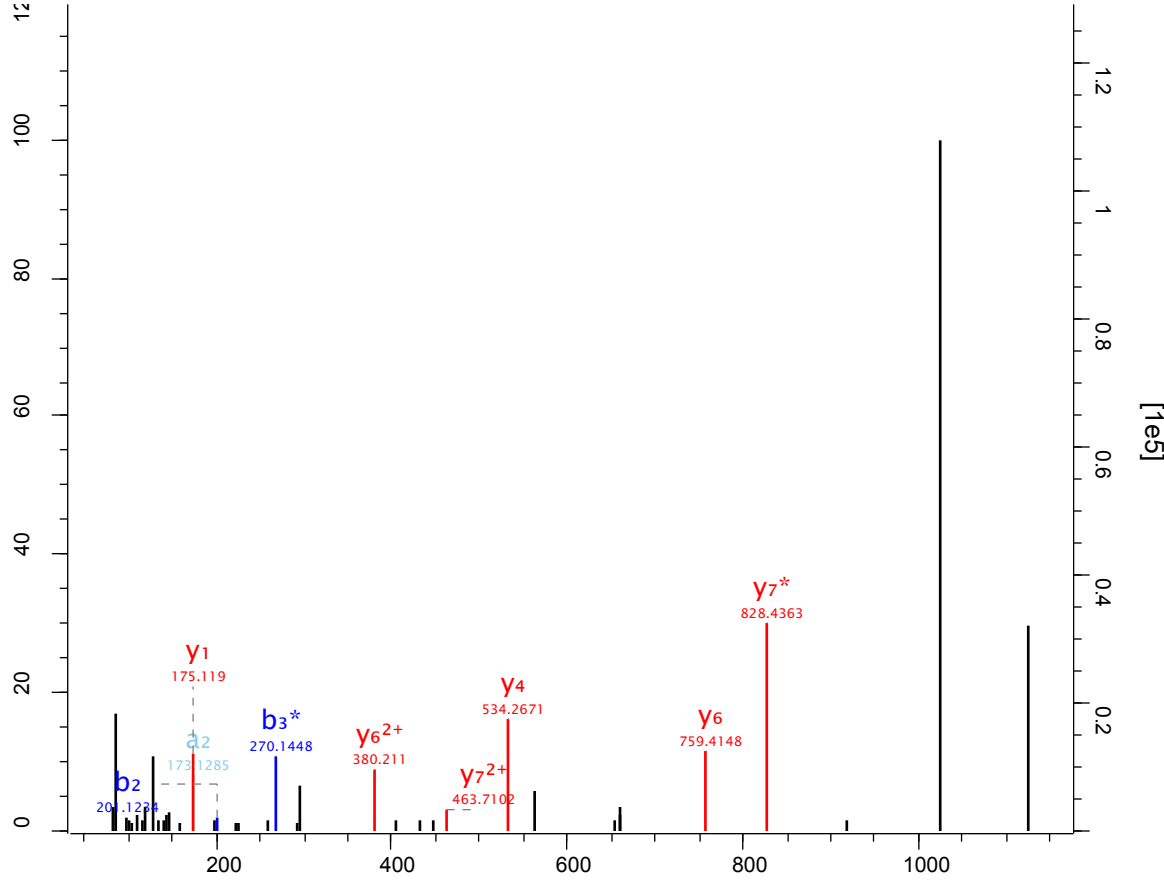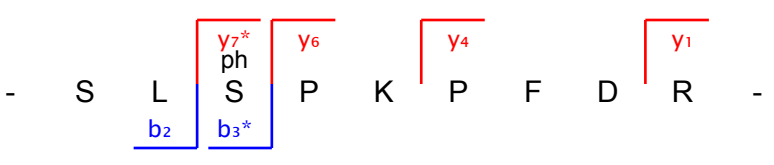

2013\_COL15\_34\_38\_151128201608

7289

FTMS; HCD

149.33

782.36

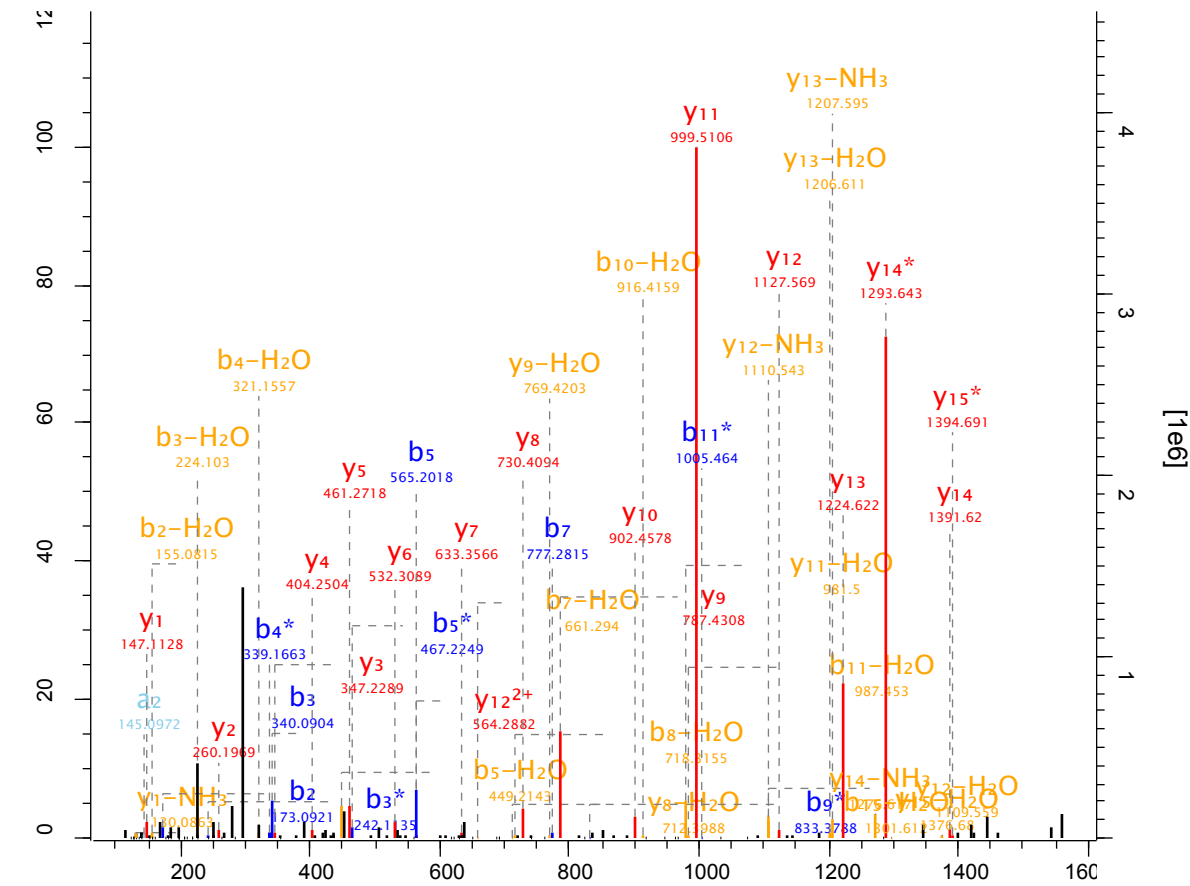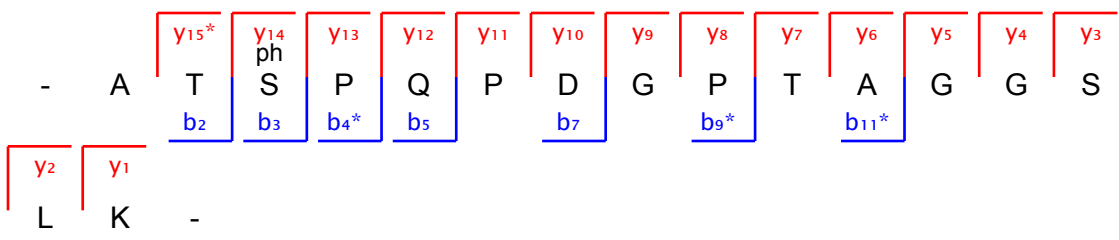

y2 L  
y1 K

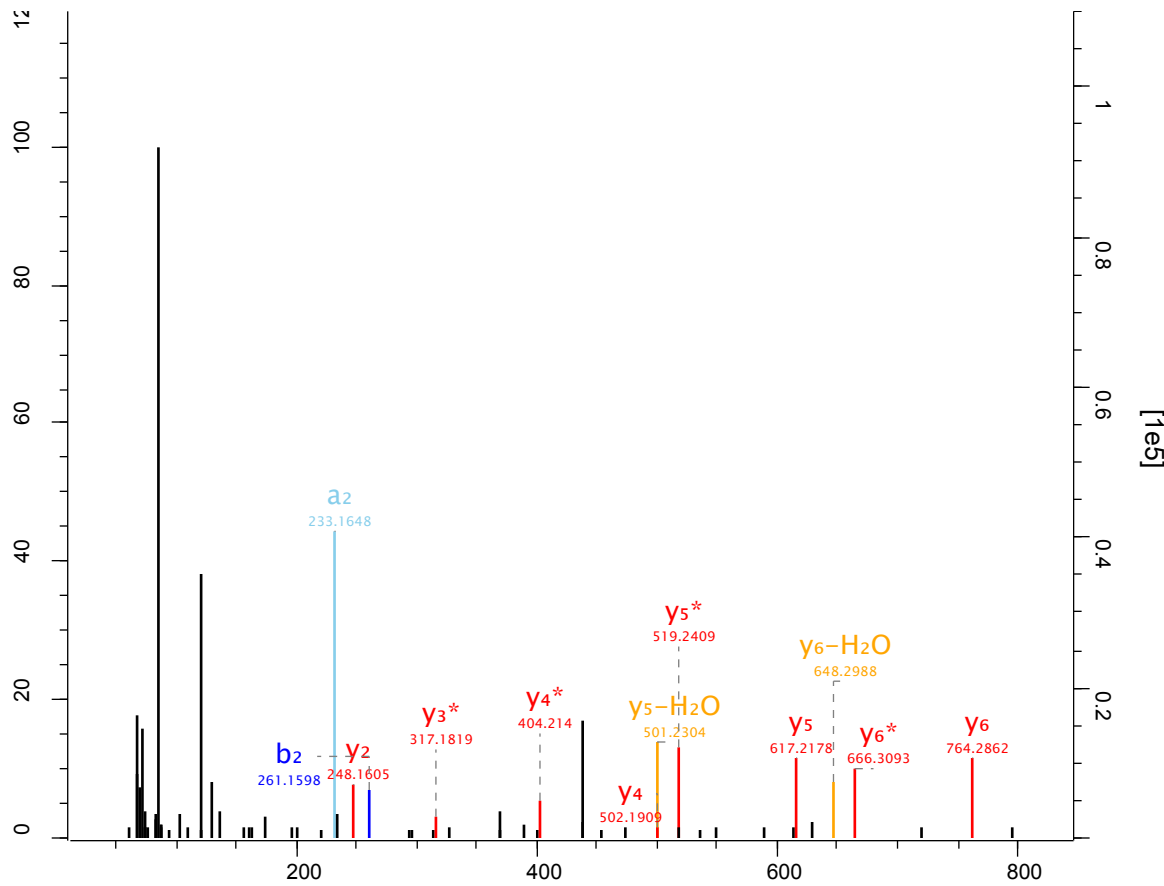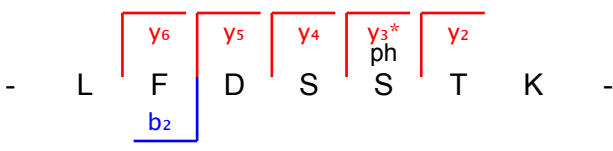



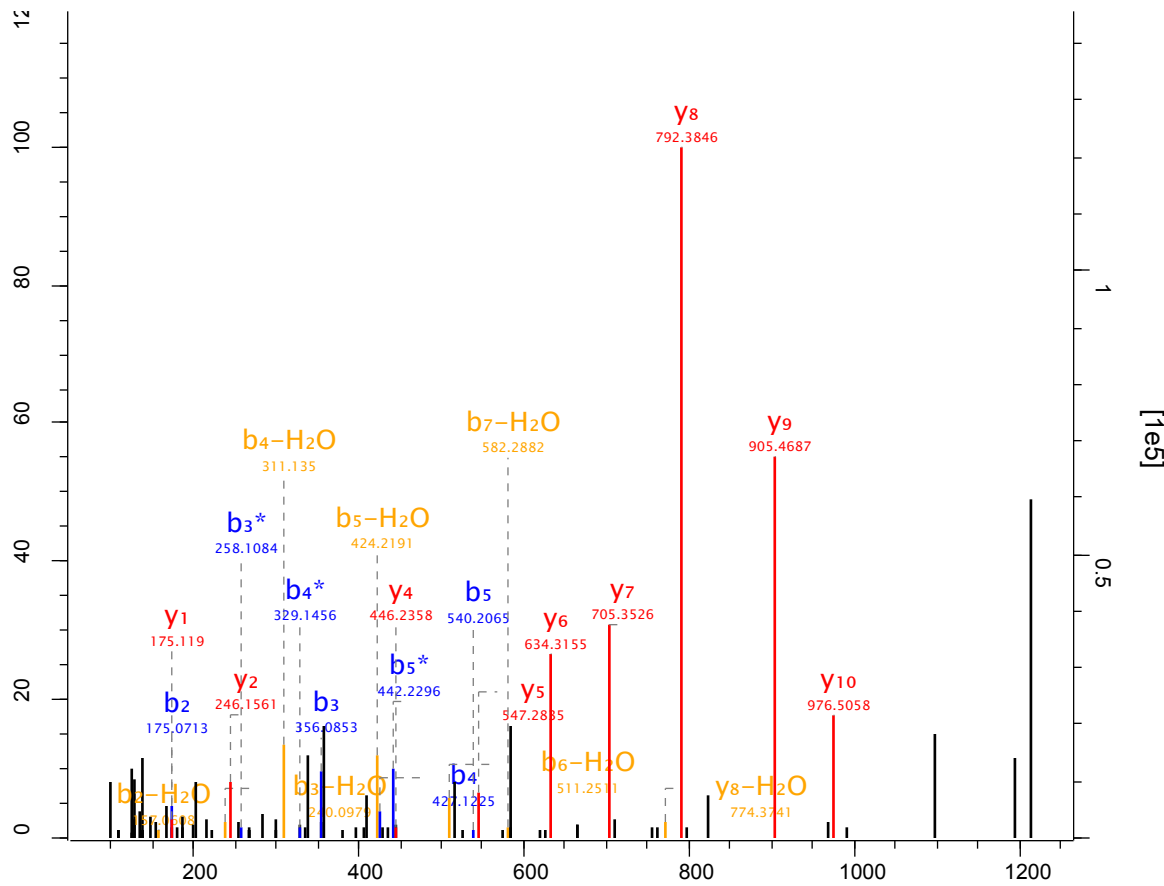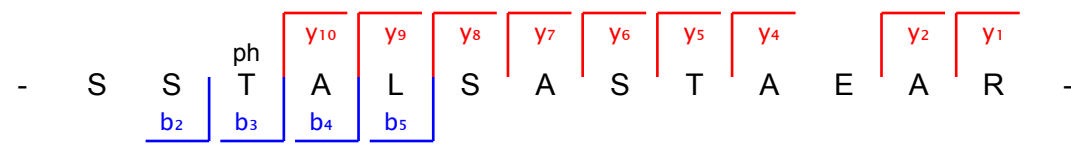

2013\_COL15\_34\_38\_151128201608

7402

FTMS; HCD

50.35

566.73

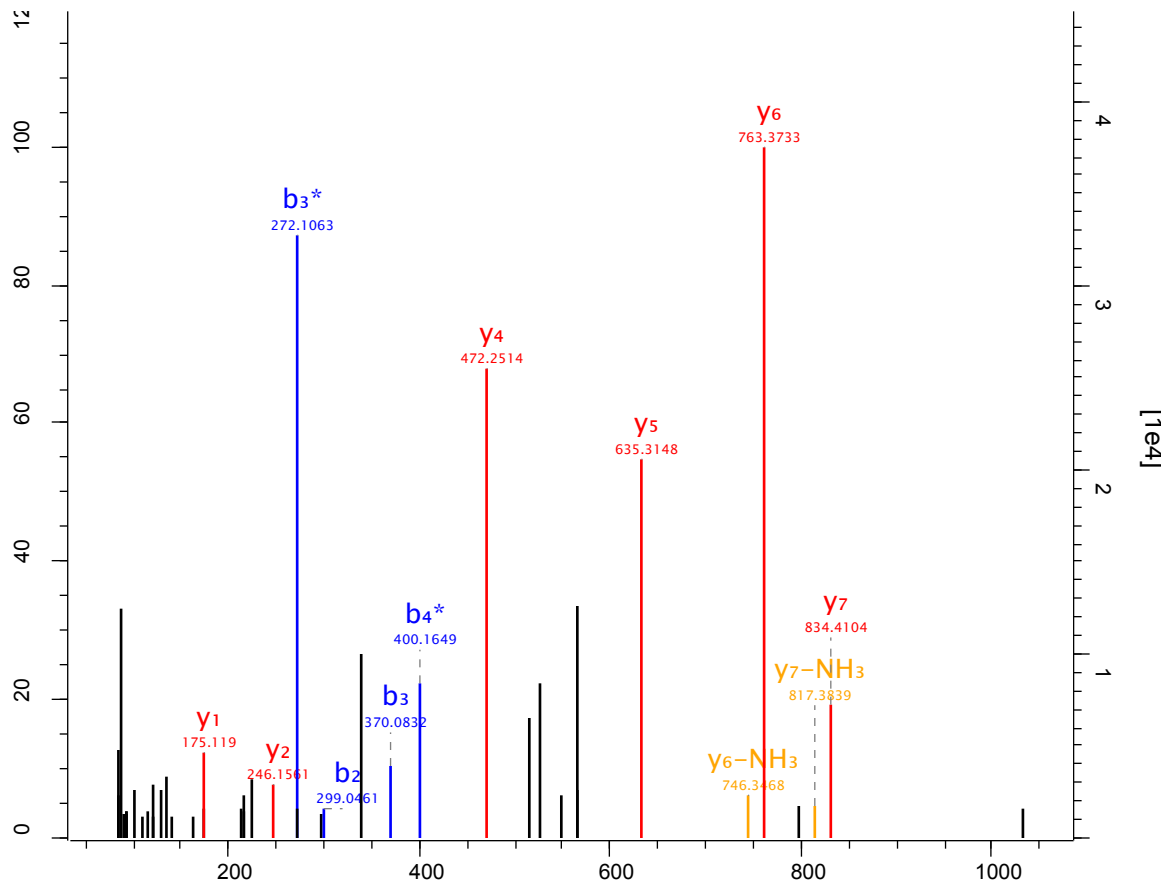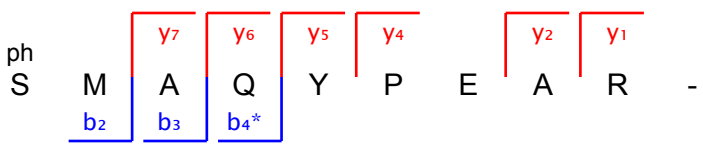

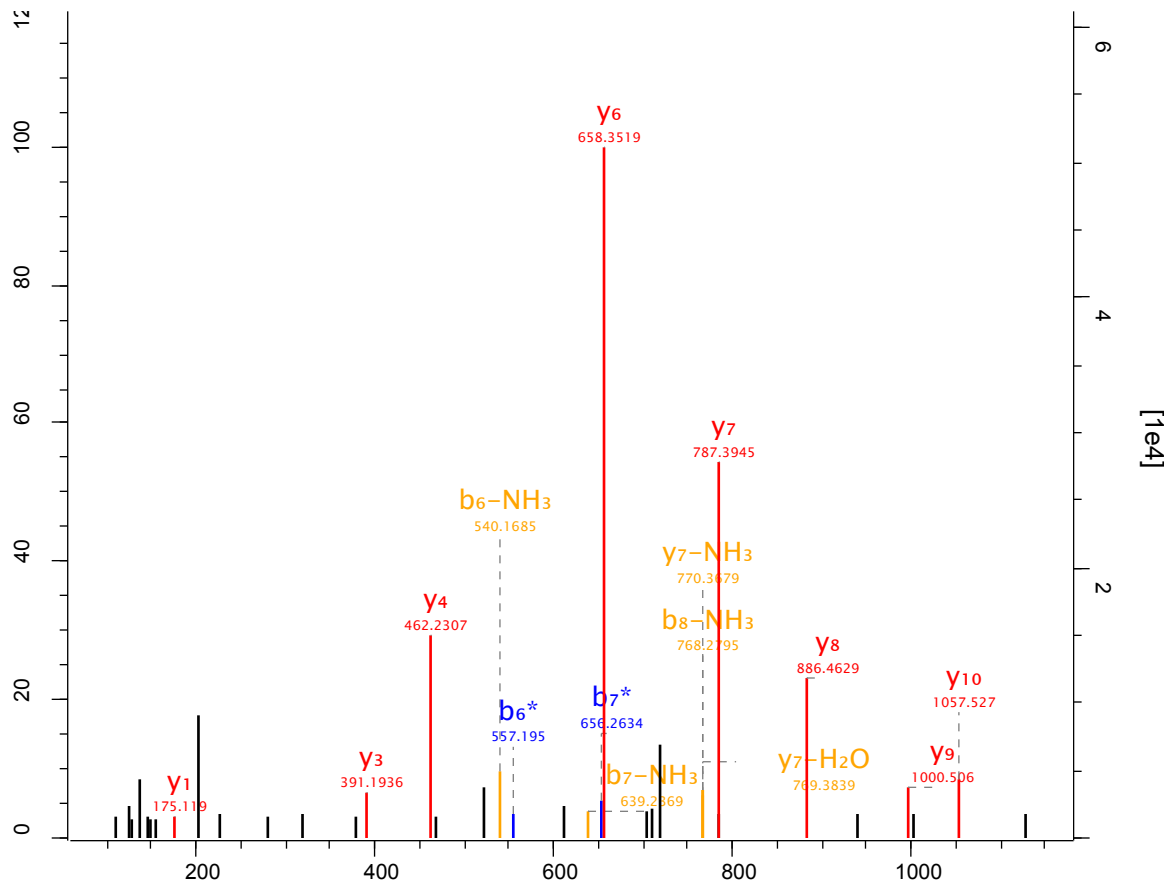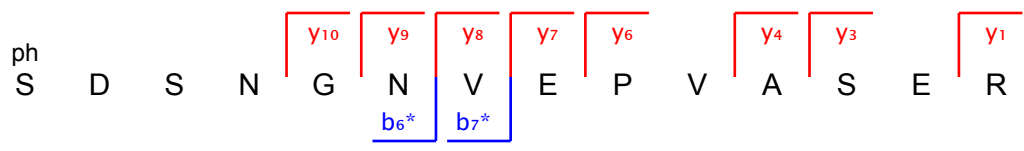

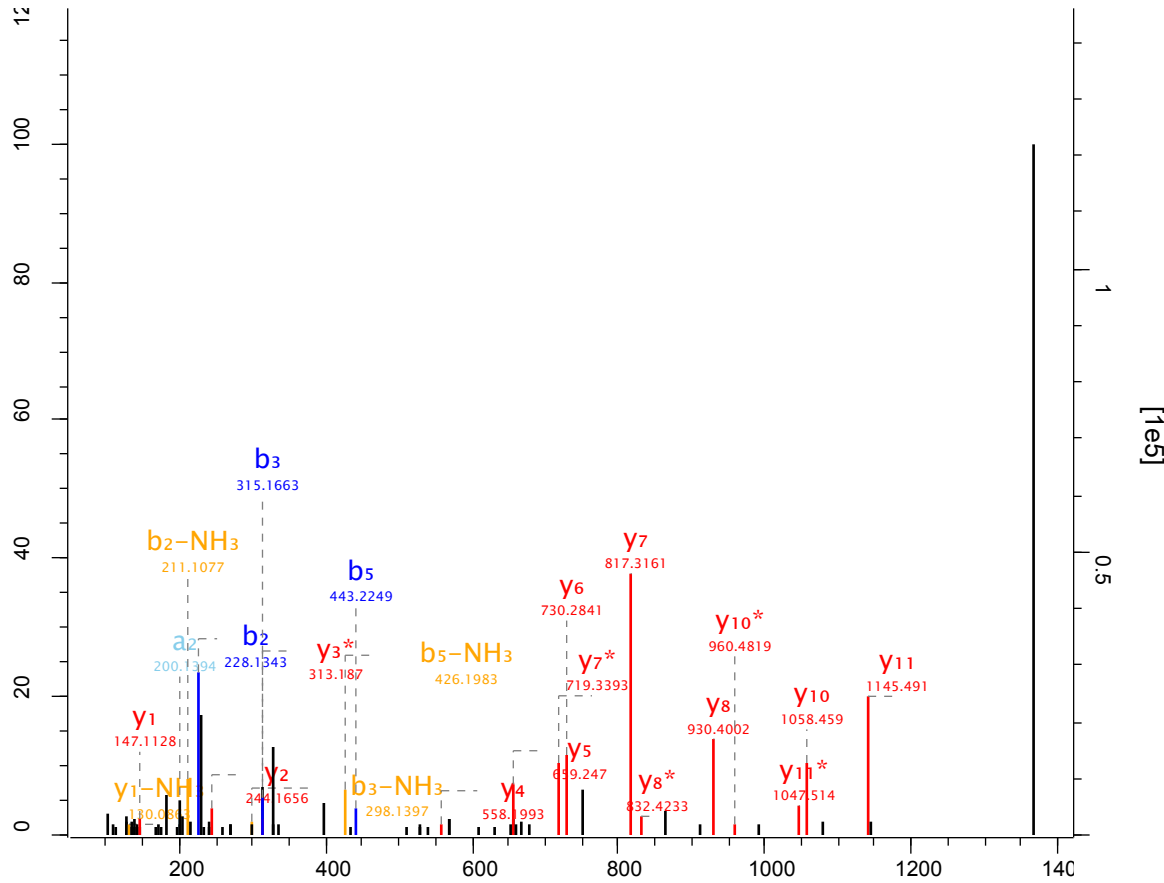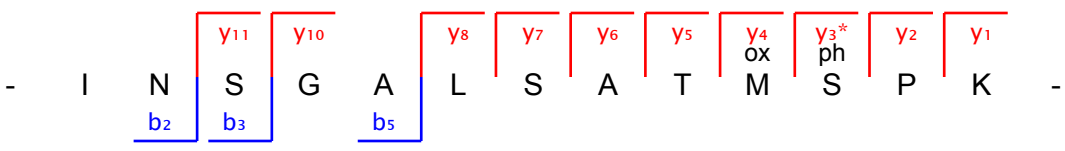

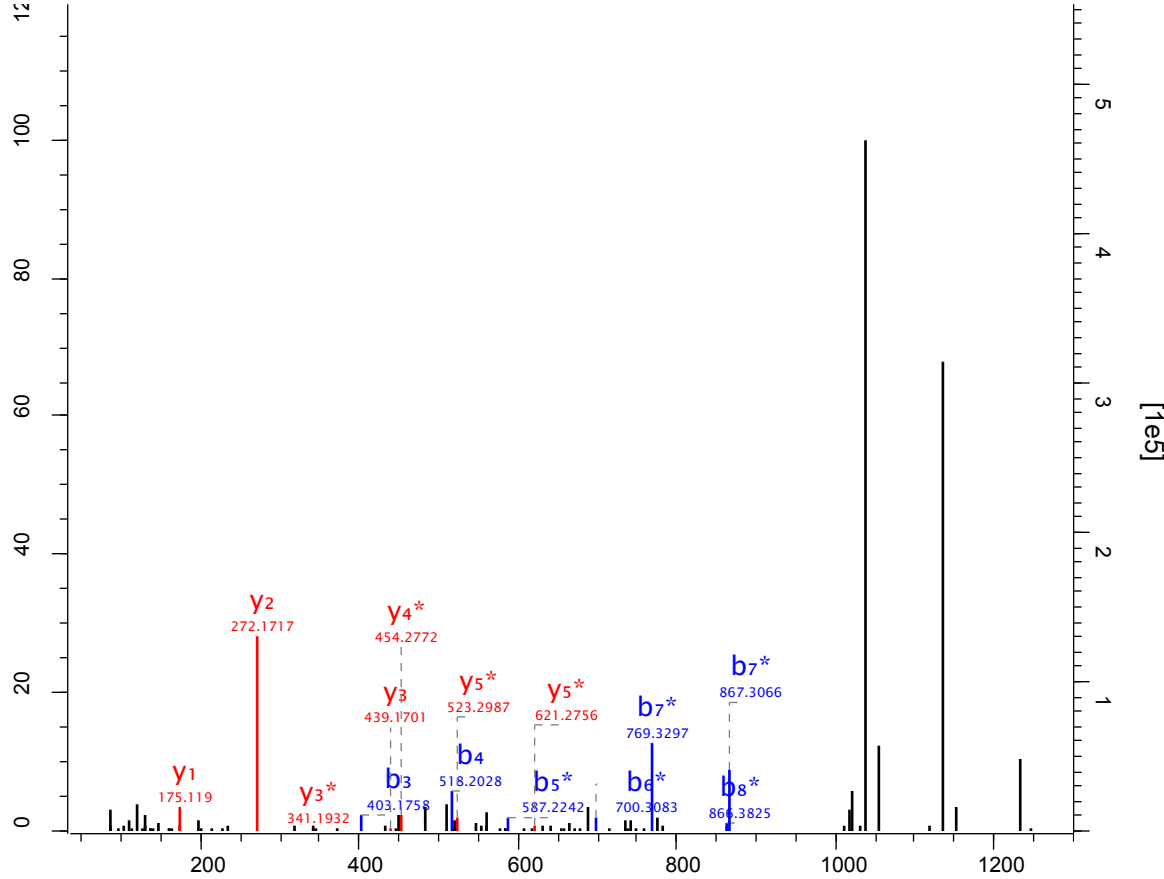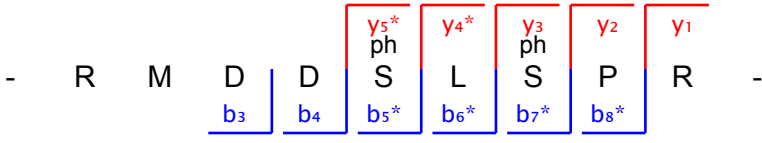

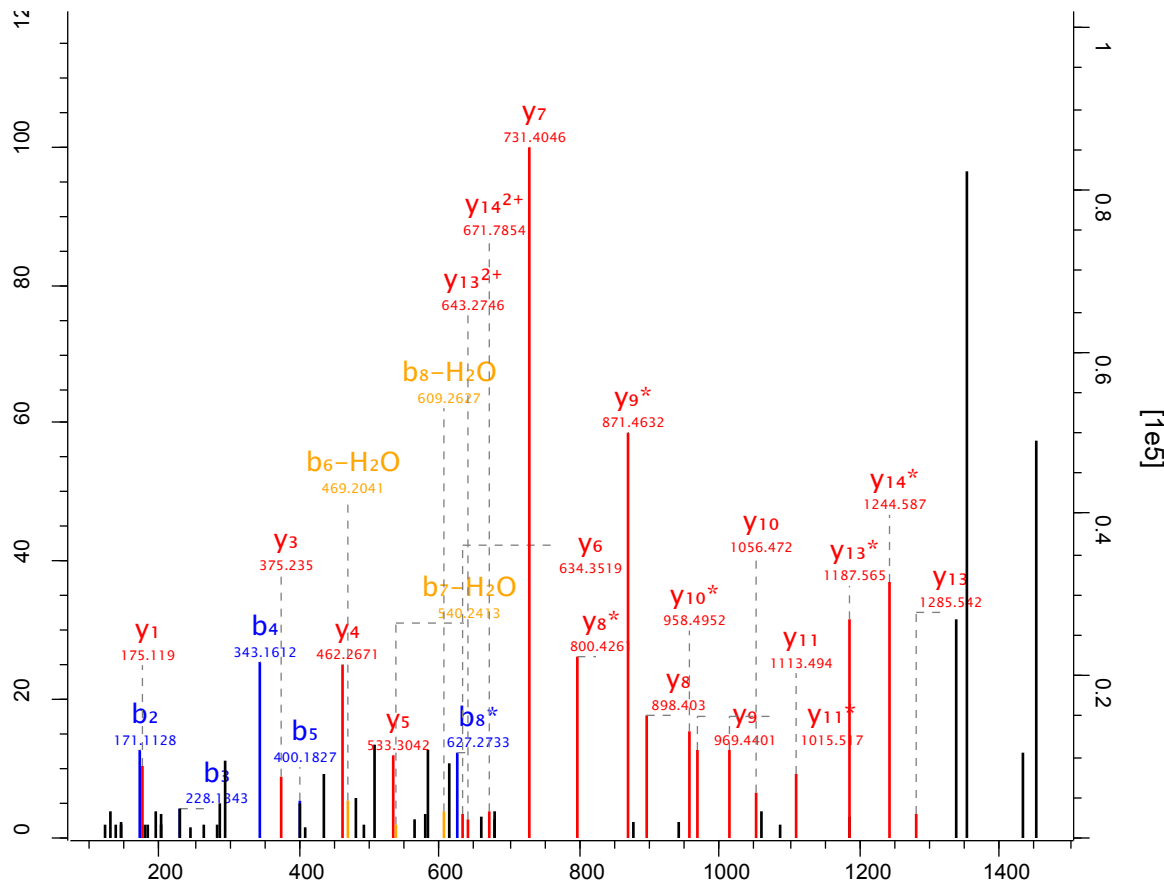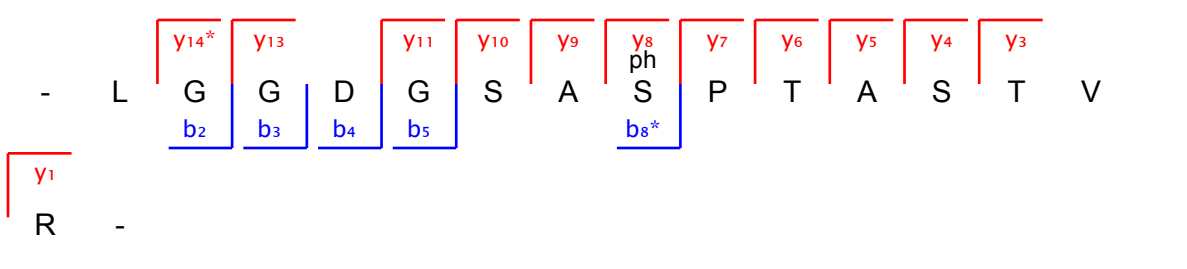

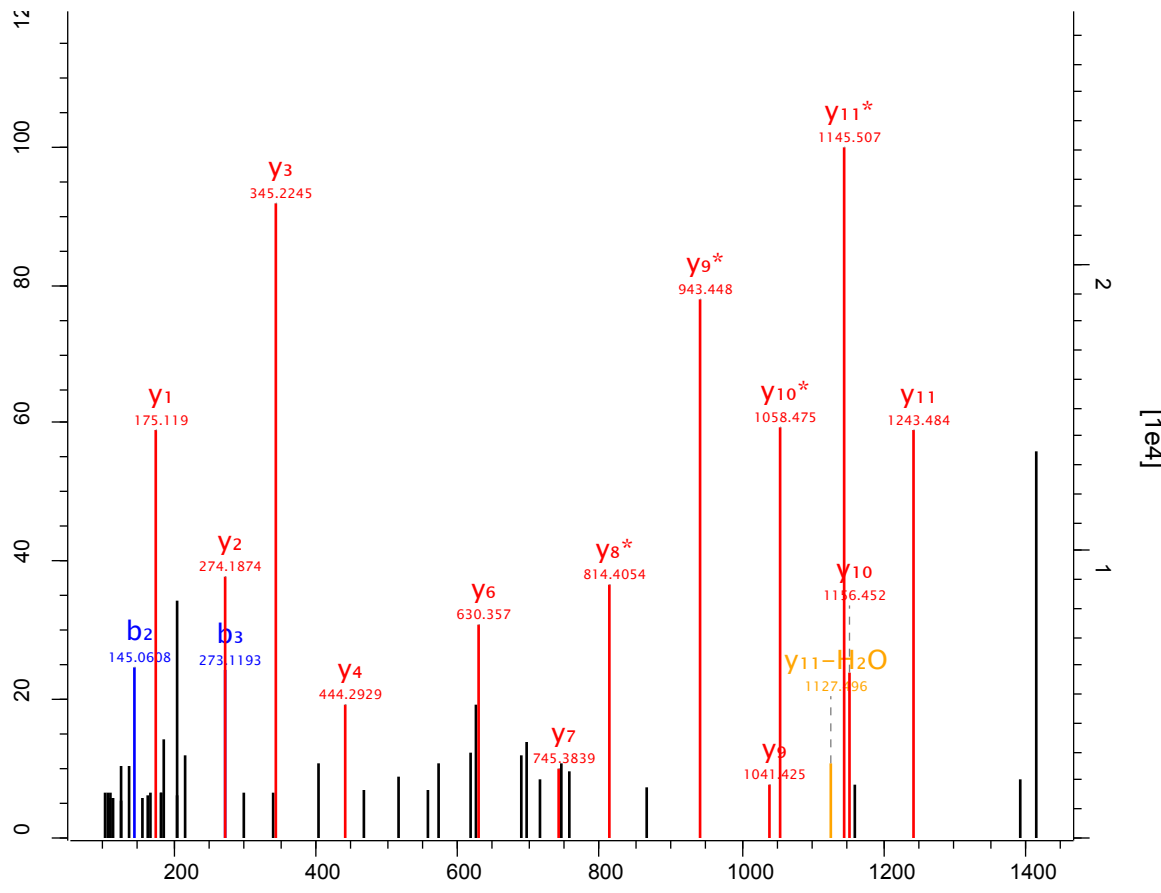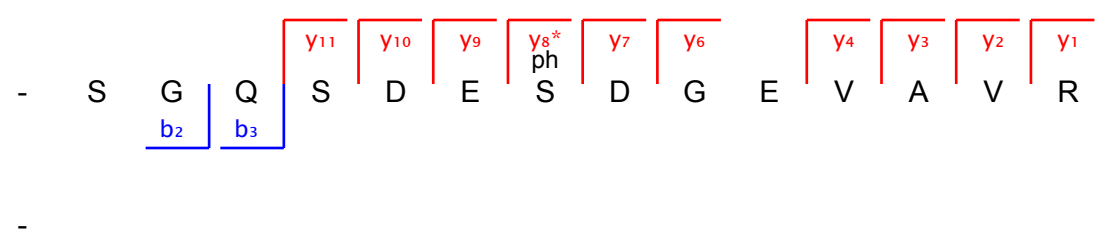

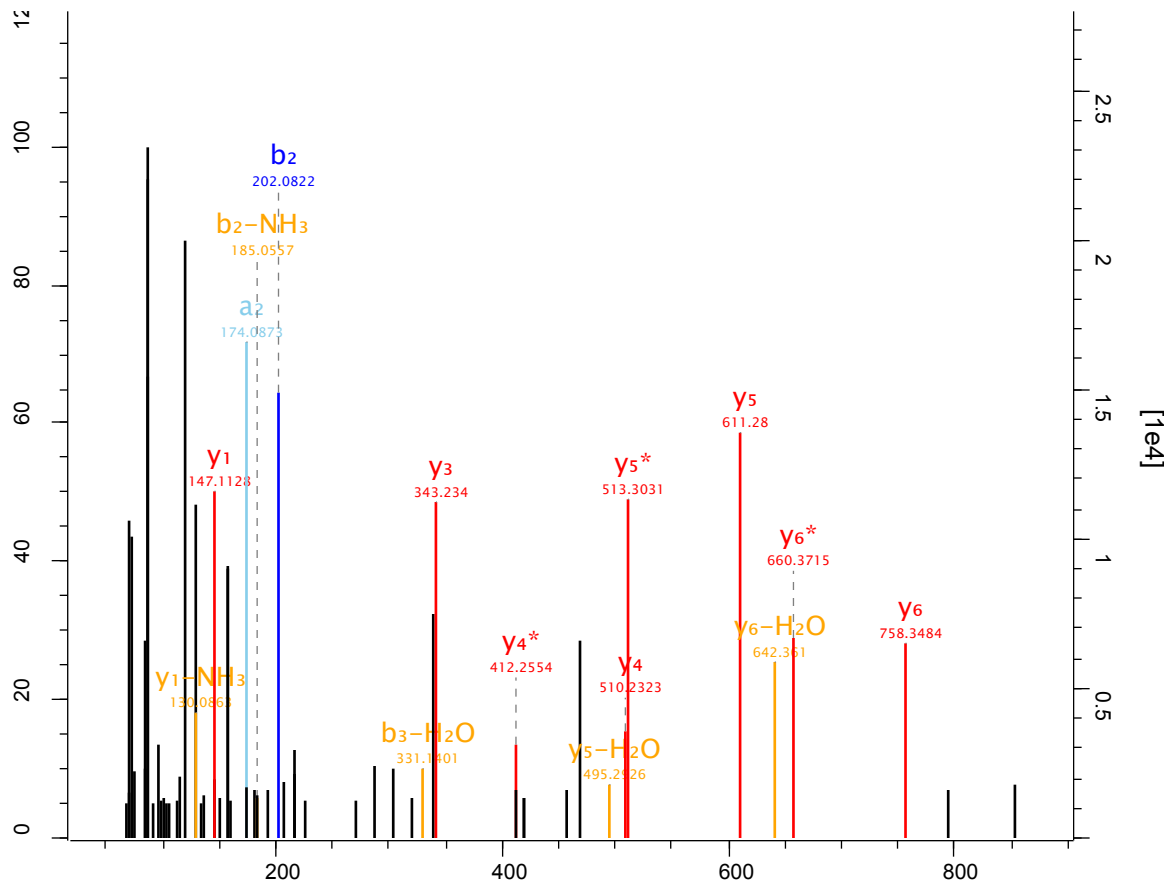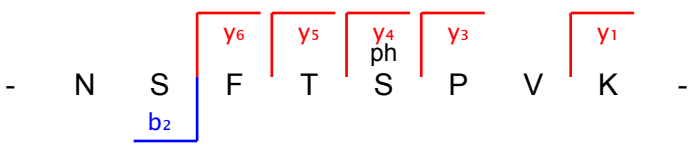



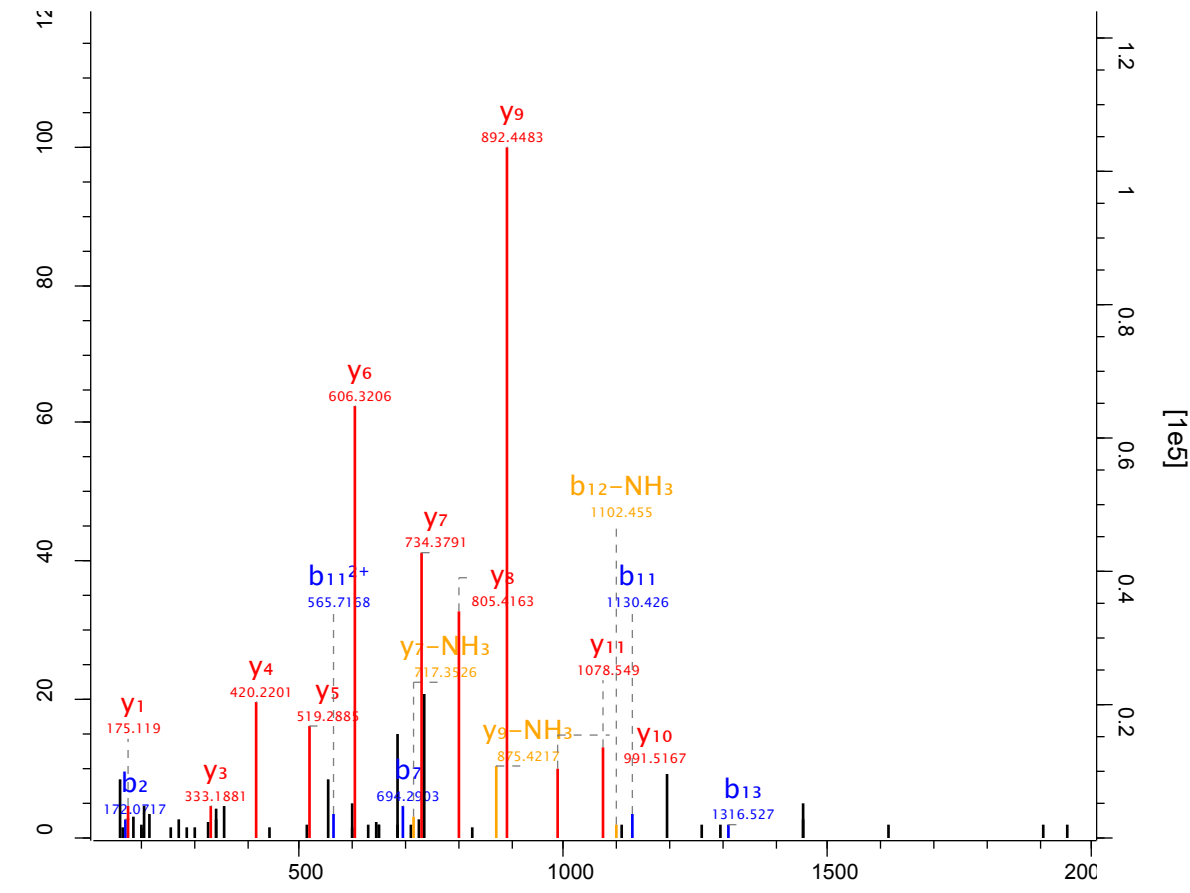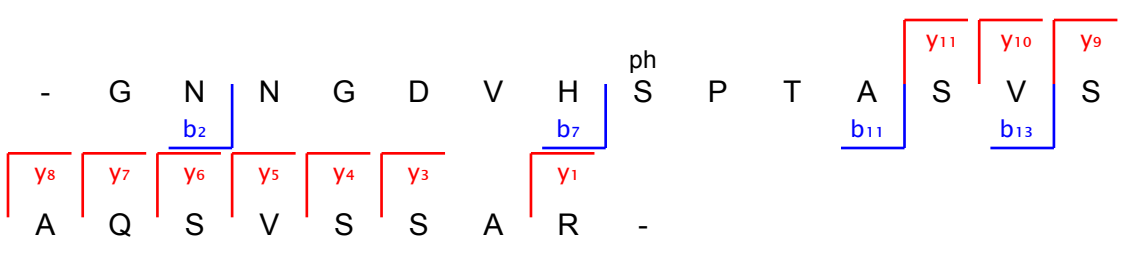

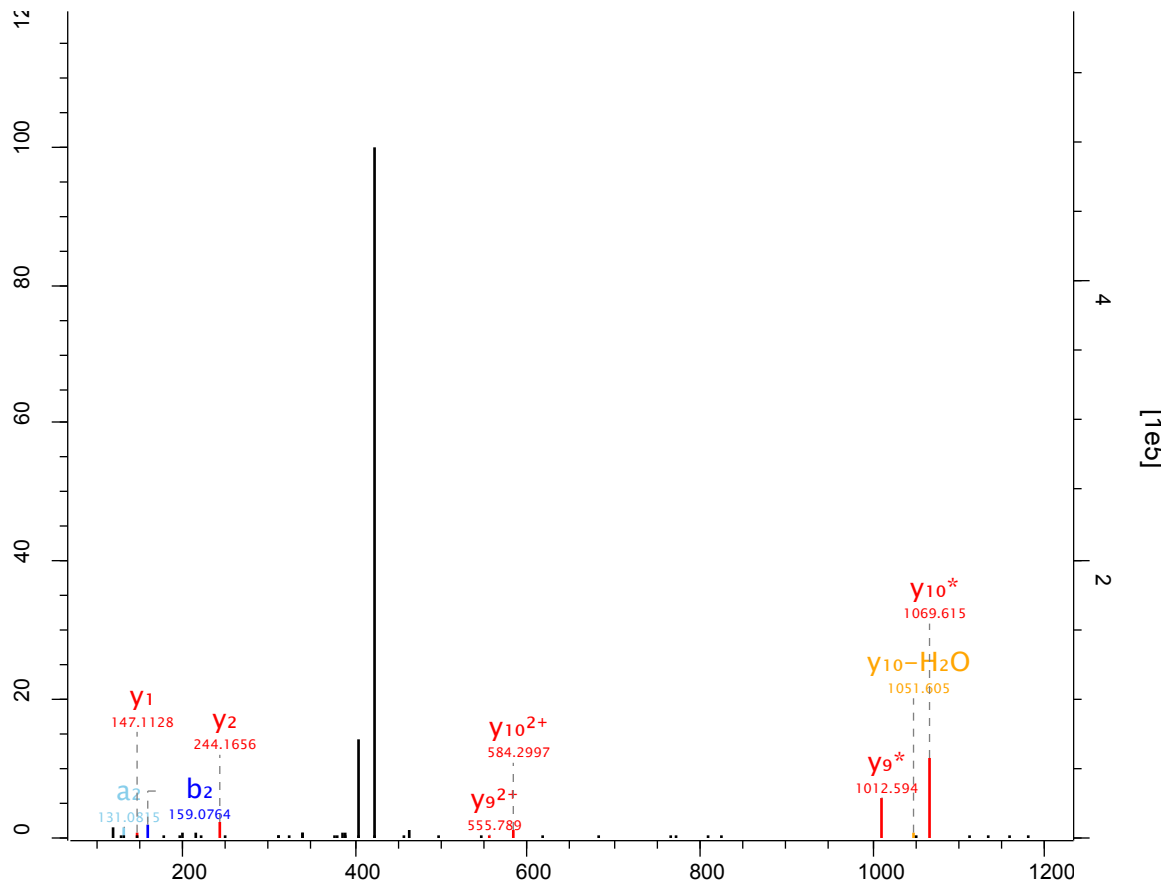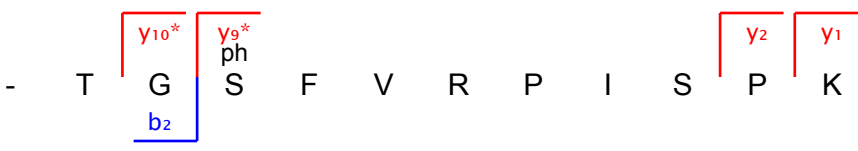



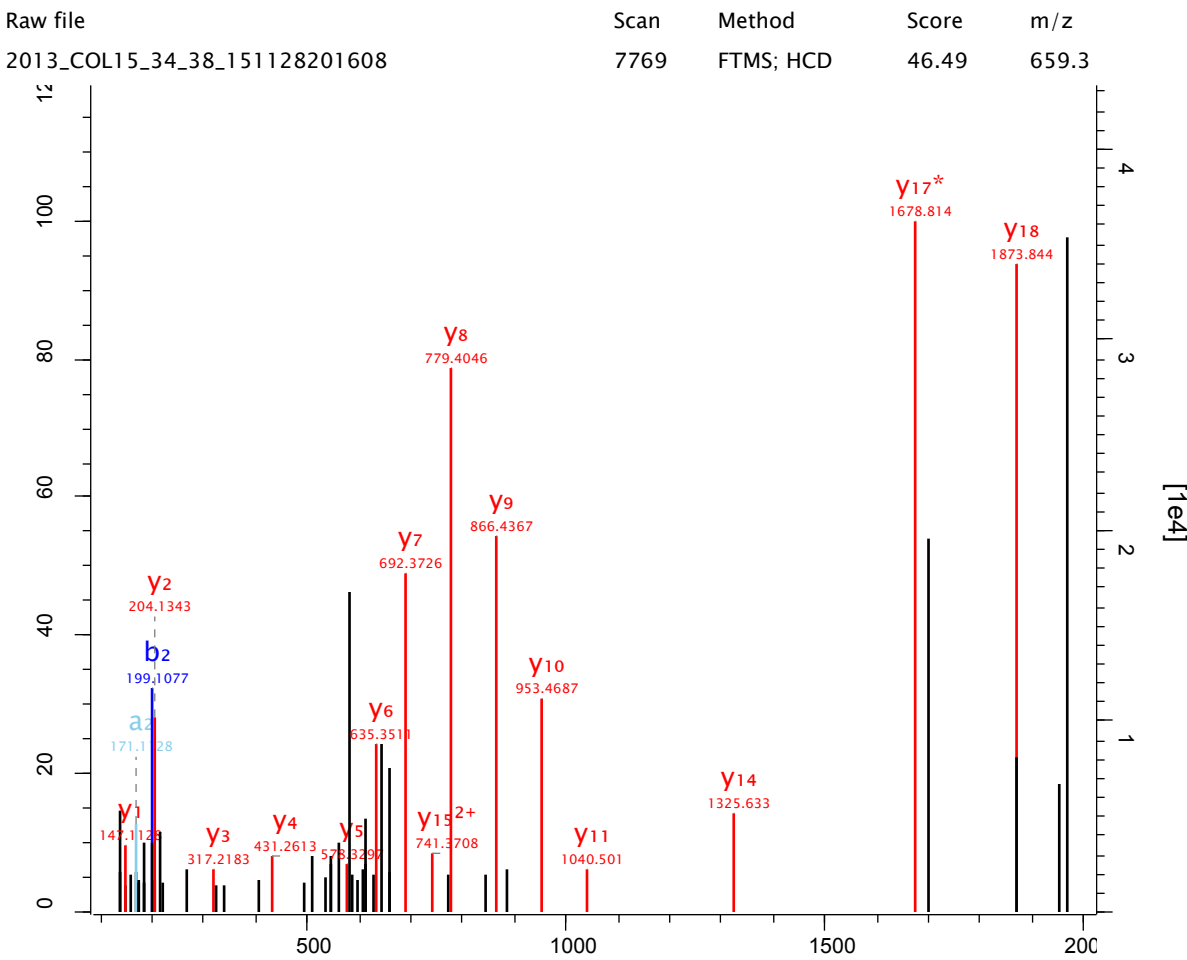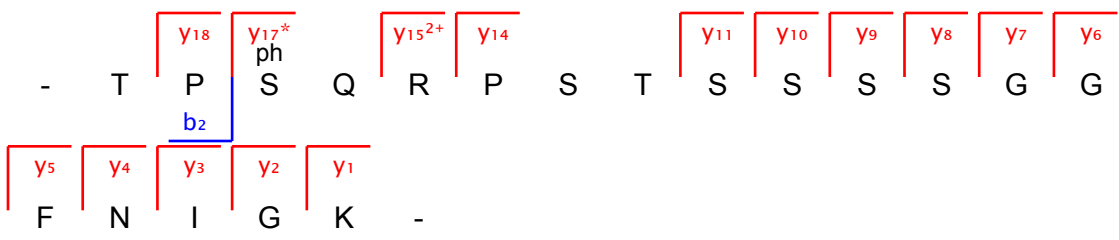

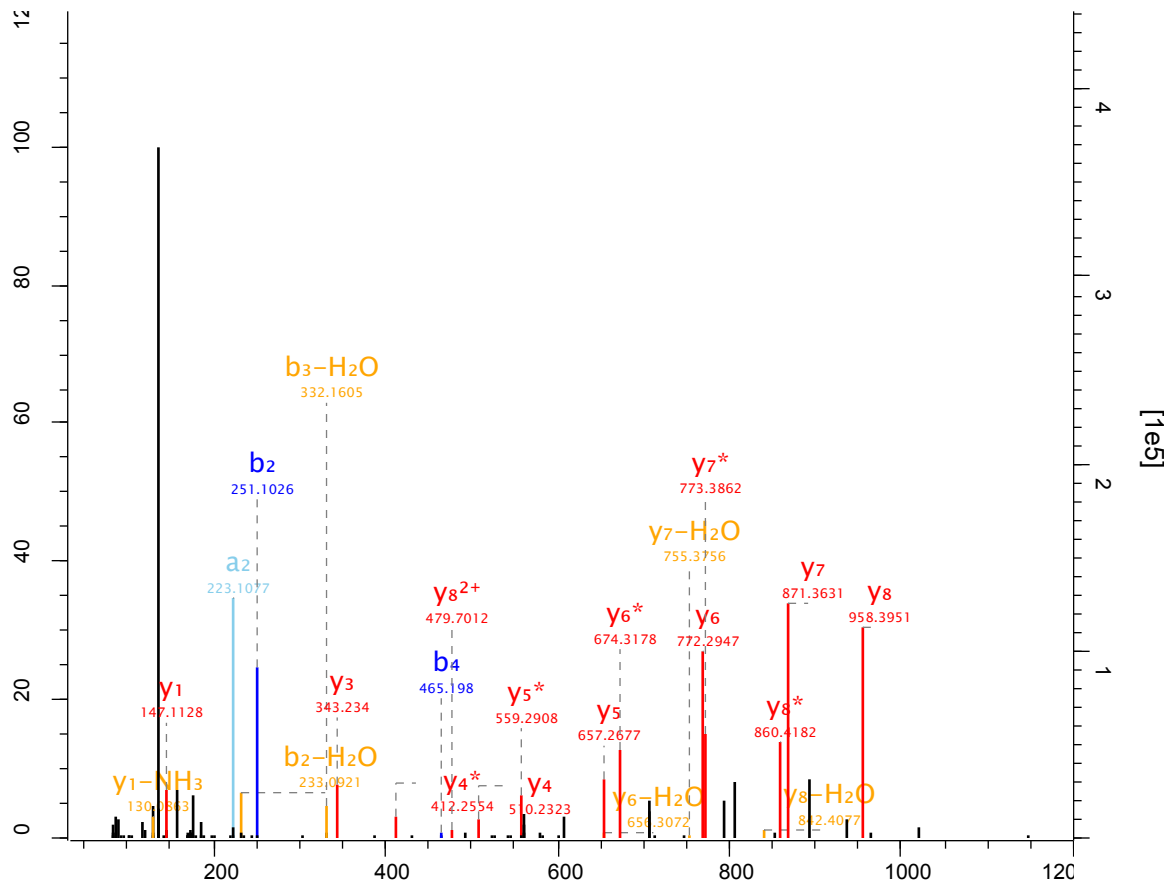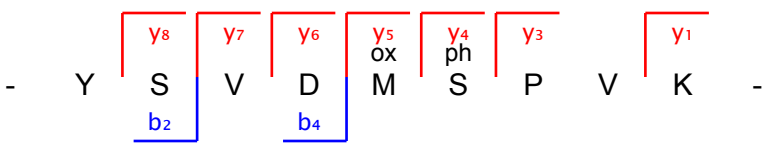

2013\_COL15\_34\_38\_151128201608

7824

FTMS; HCD

200.19

690.29

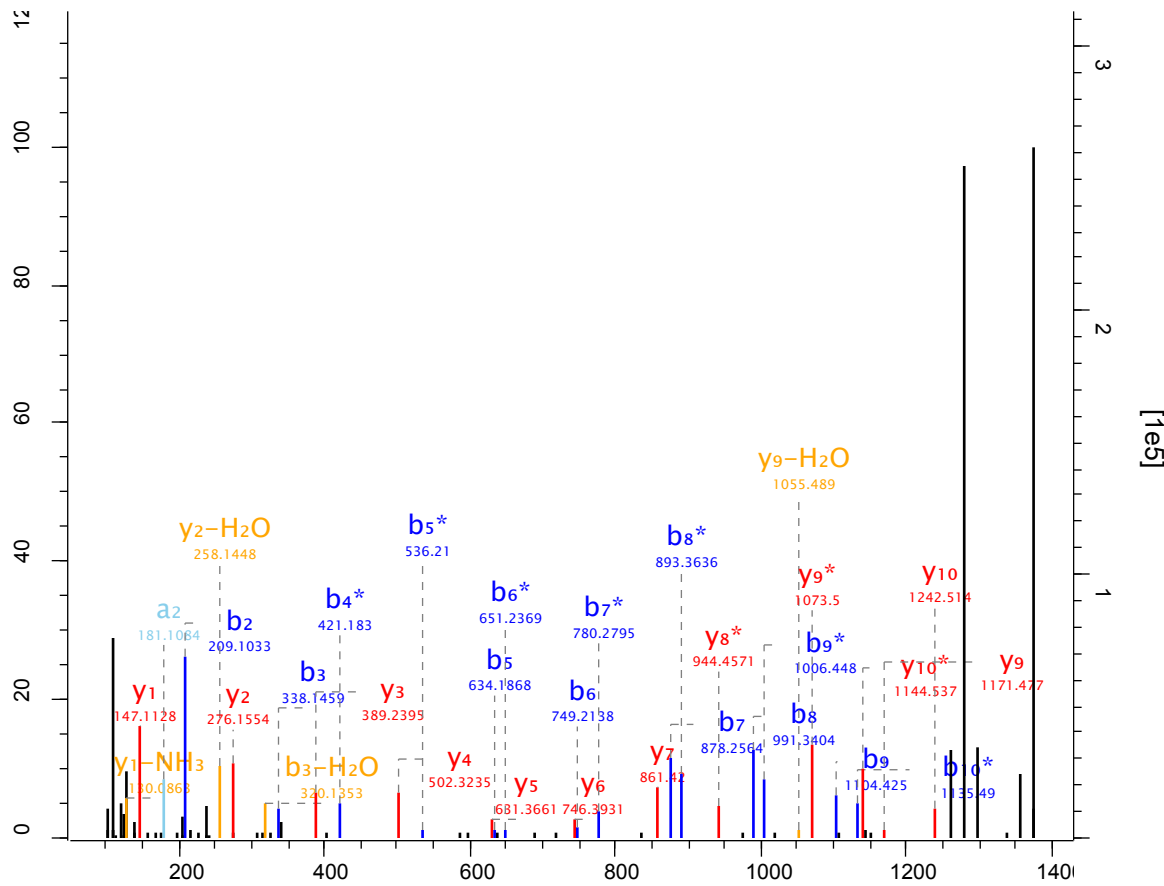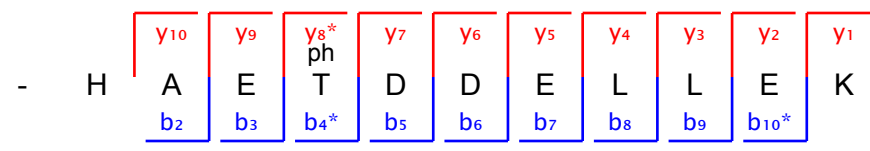

2013\_COL15\_34\_38\_151128201608

7845

FTMS; HCD

80.44

599.79

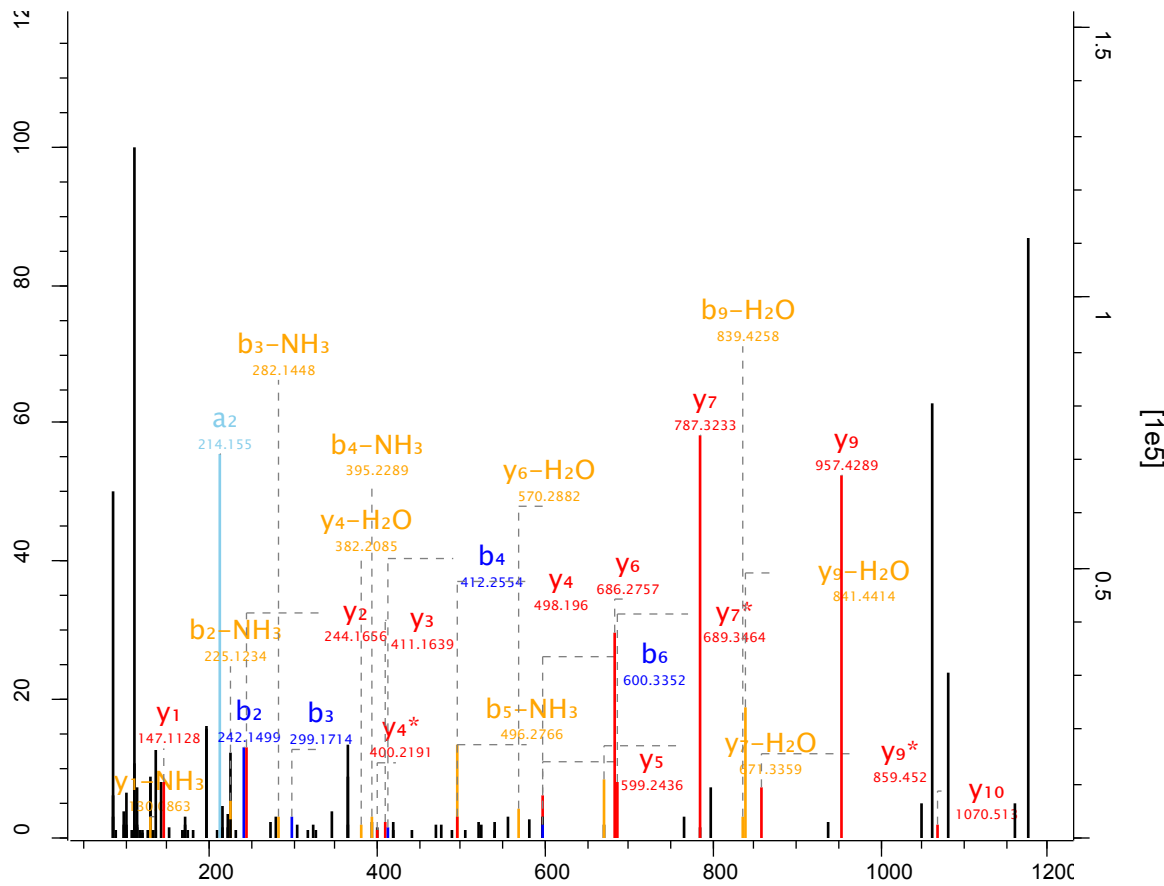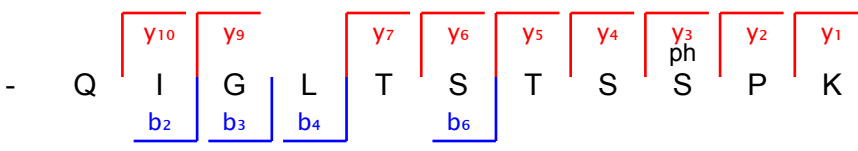

2013\_COL15\_34\_38\_151128201608

7865

FTMS; HCD

140.9

677.02

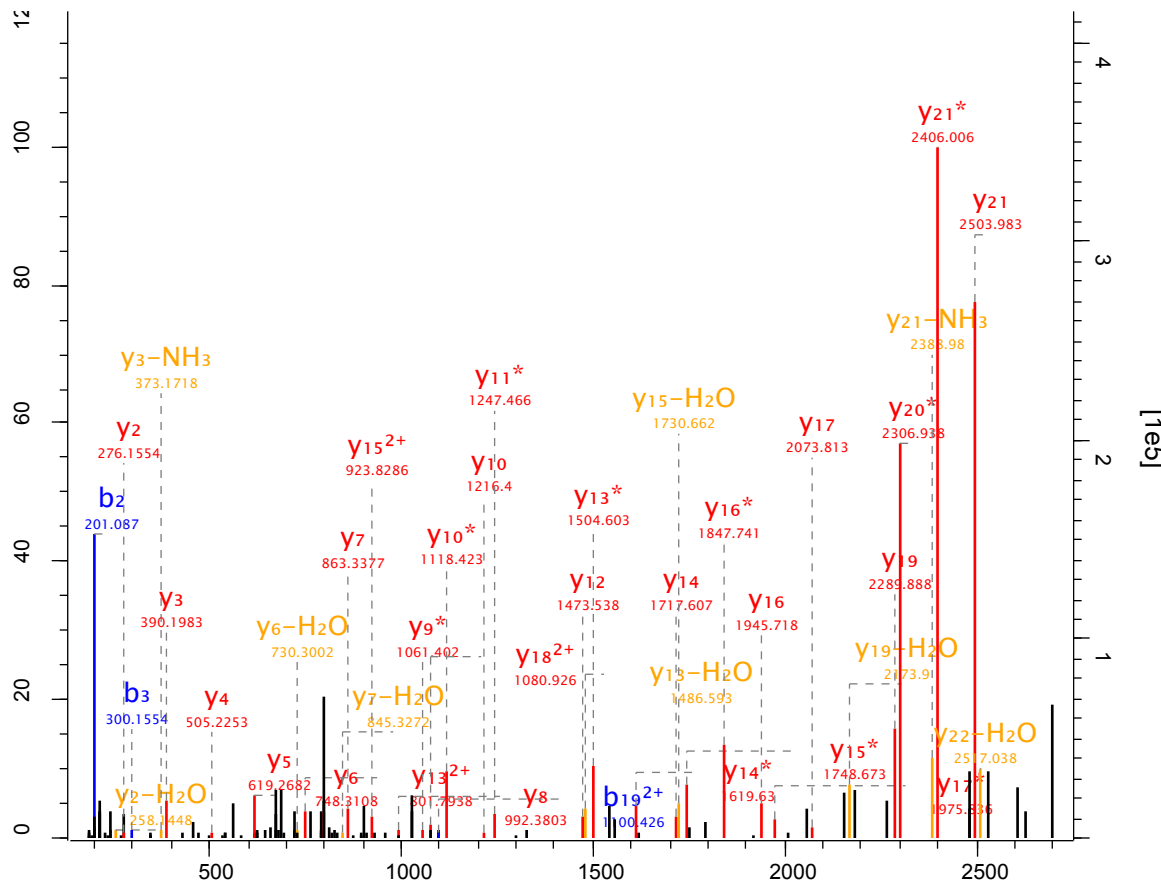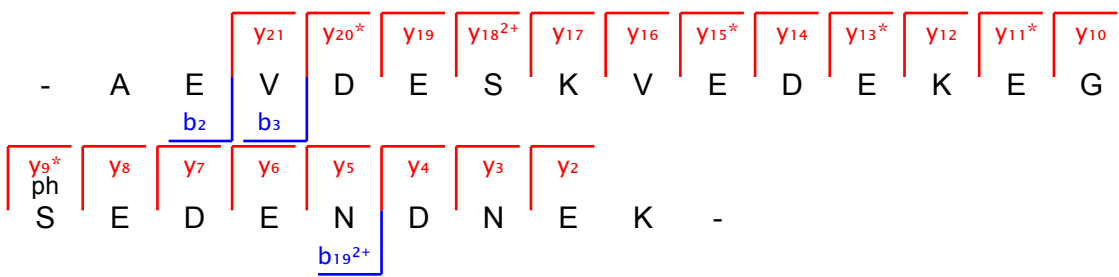





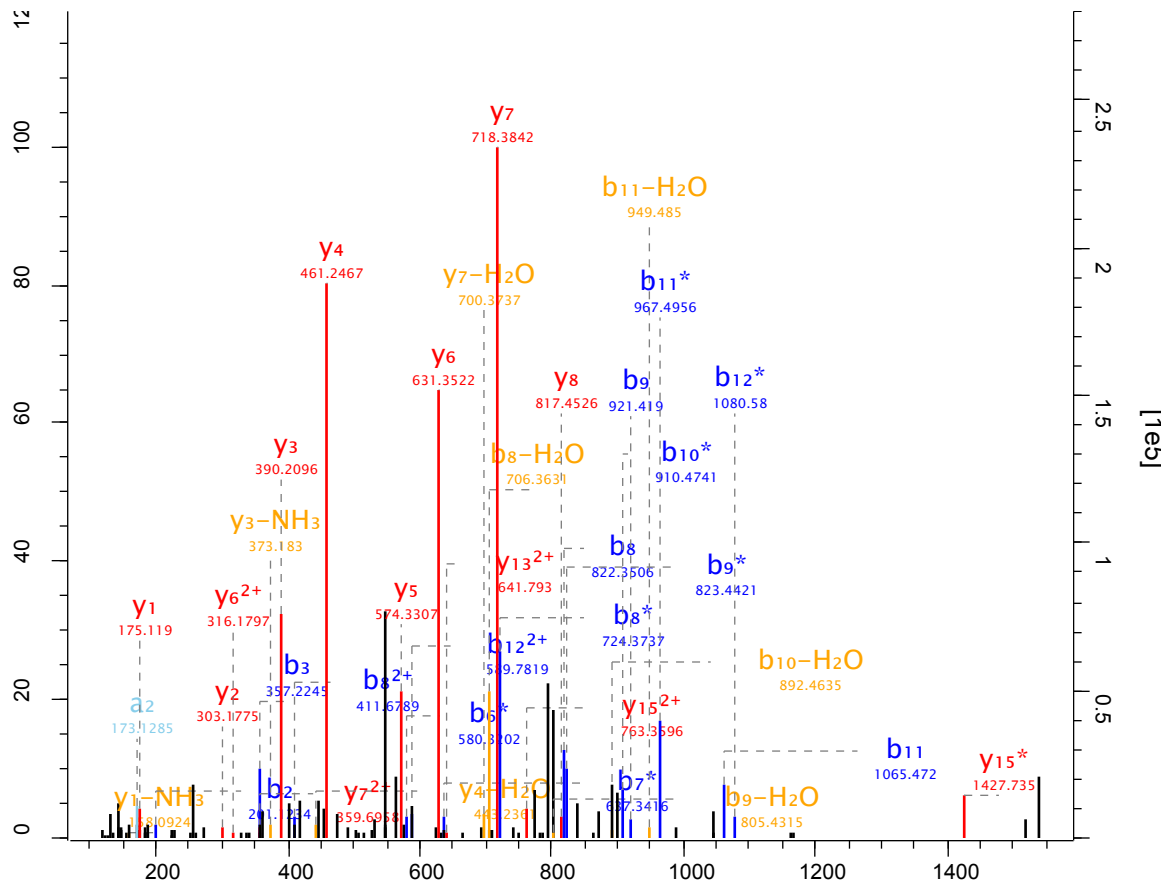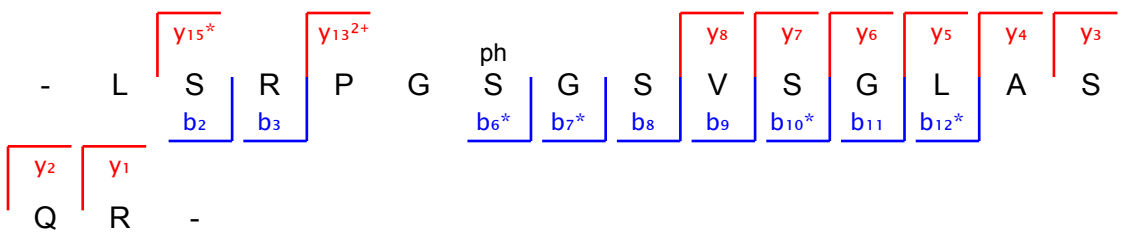

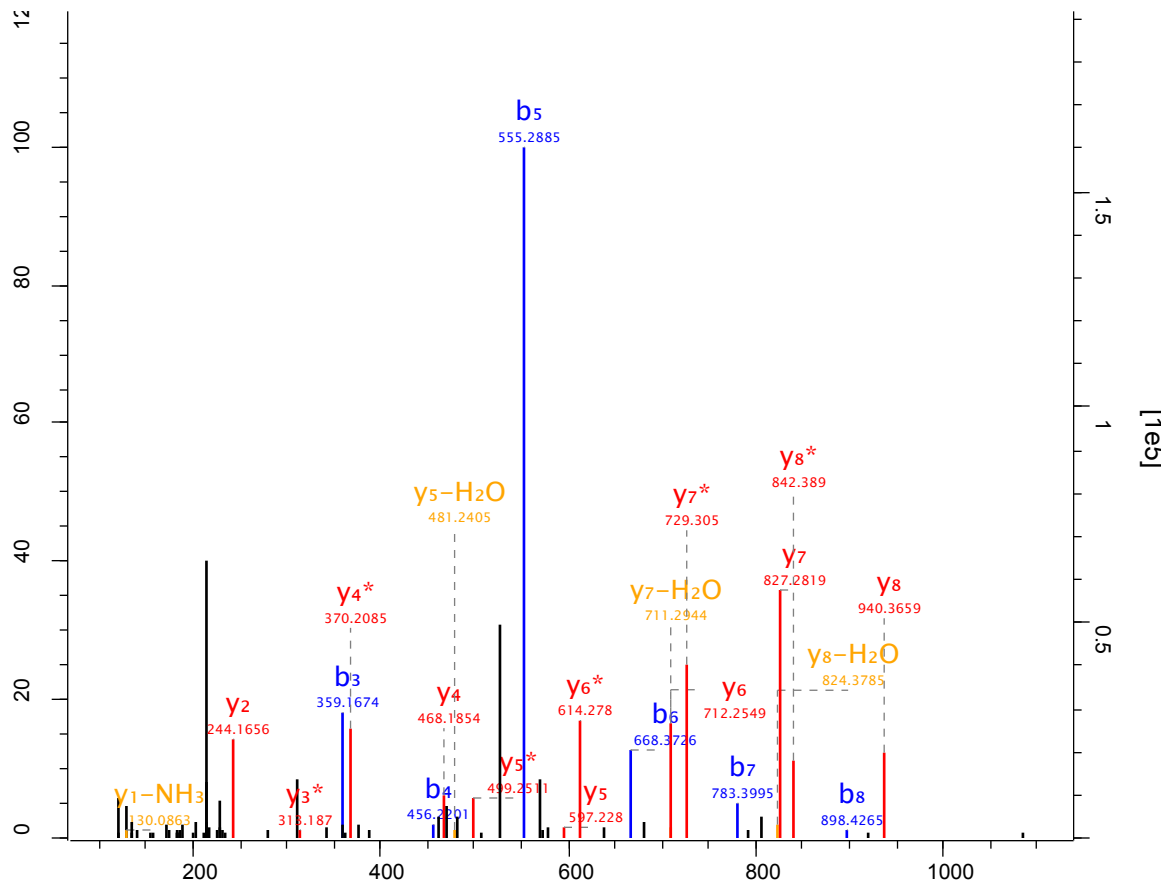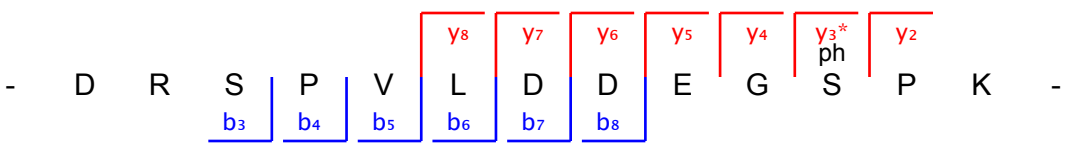

2013\_COL15\_34\_38\_151128201608

8046

FTMS; HCD

57.97

670.81

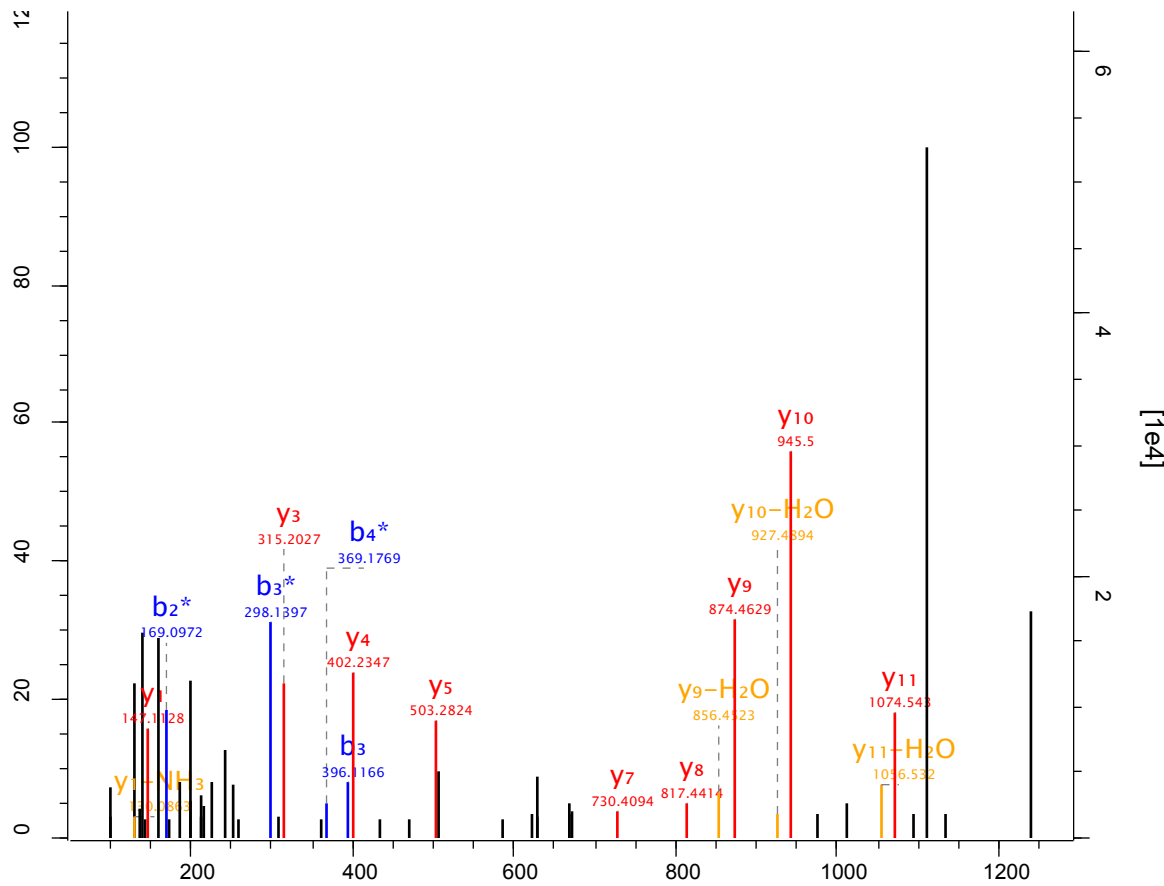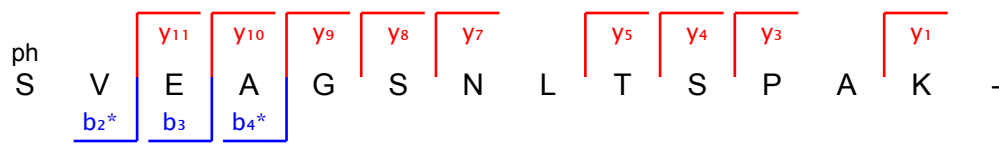

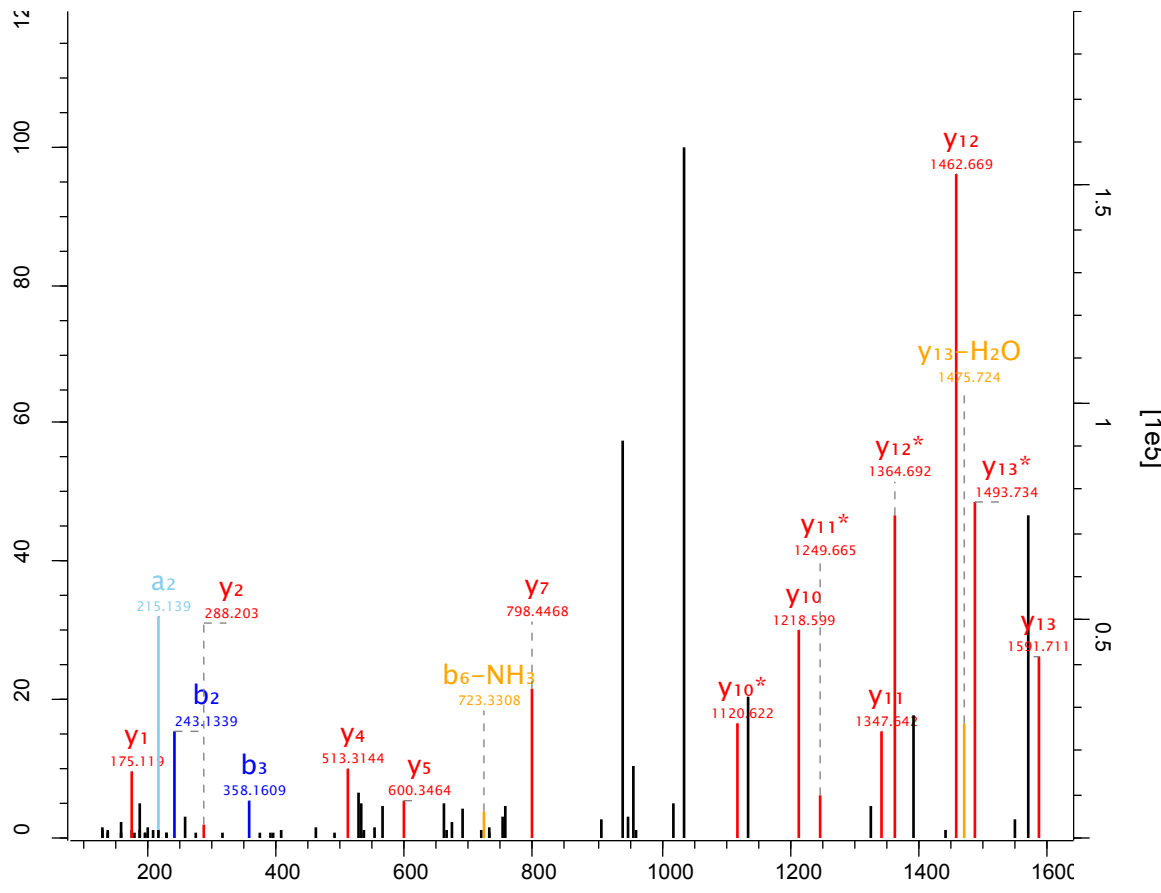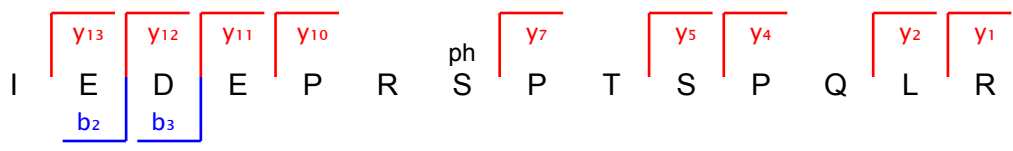

Raw file  
2013\_COL15\_34\_38\_151128201608

Scan 8151 Method FTMS; HCD Score 60.55 m/z 580.26

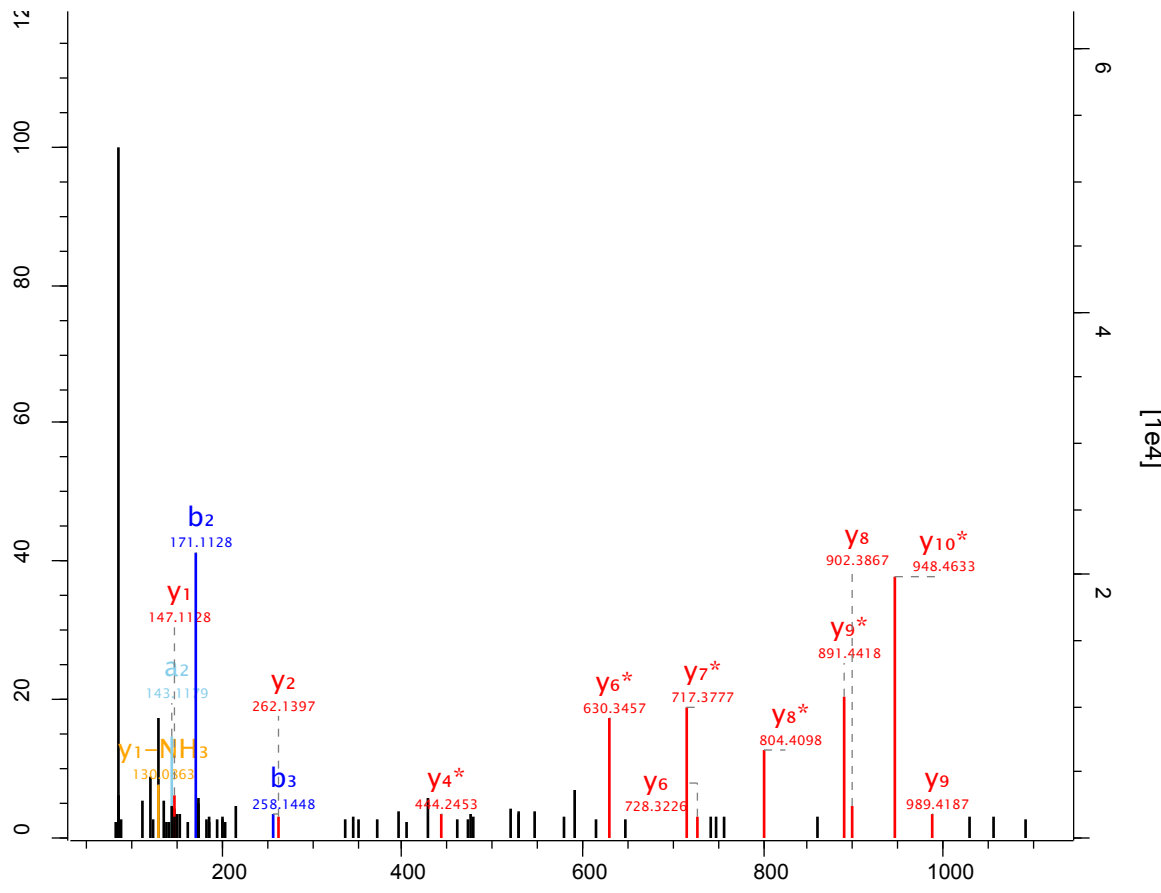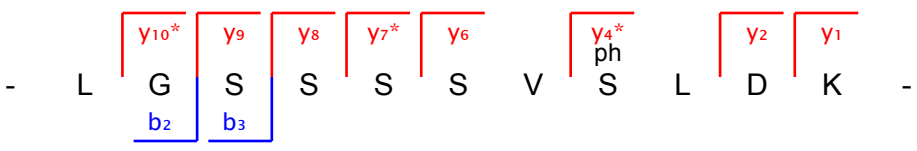

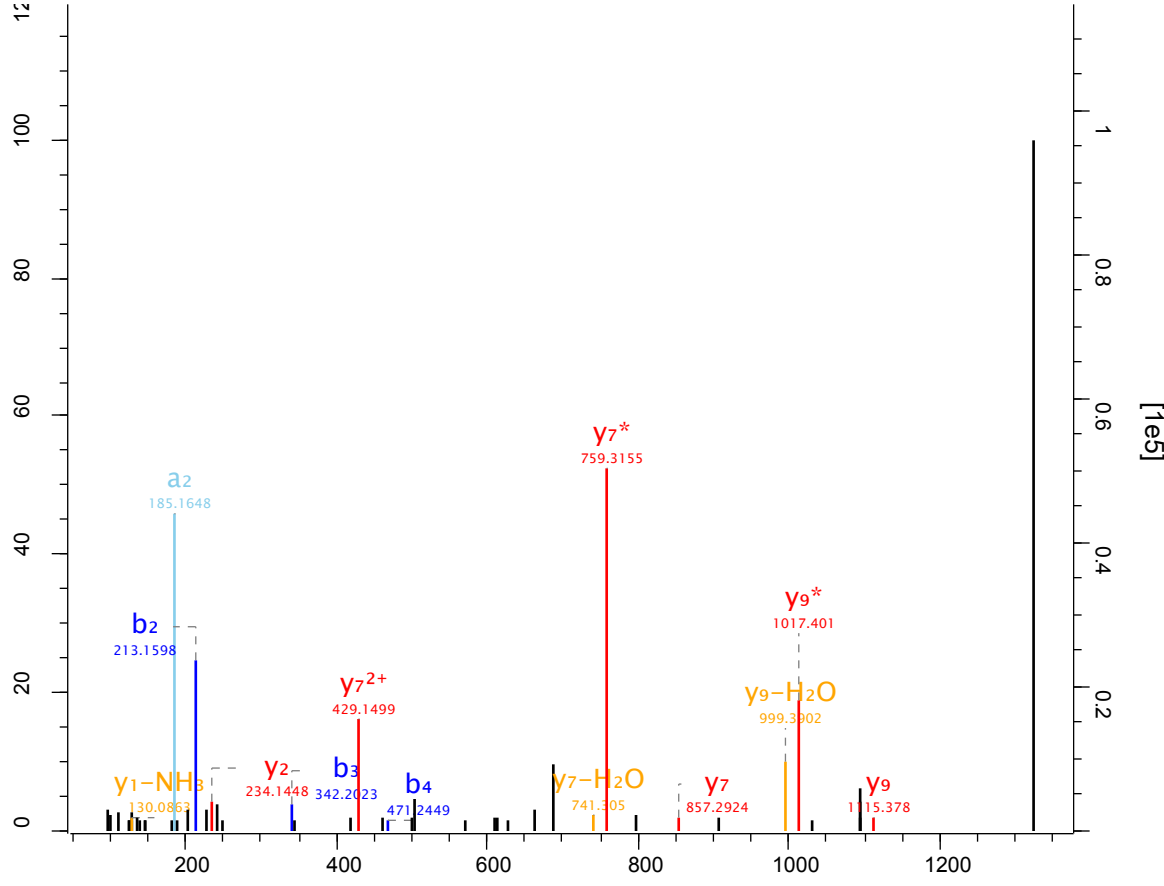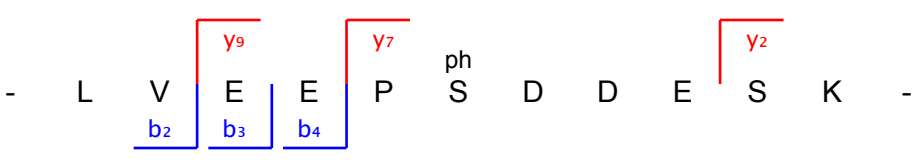

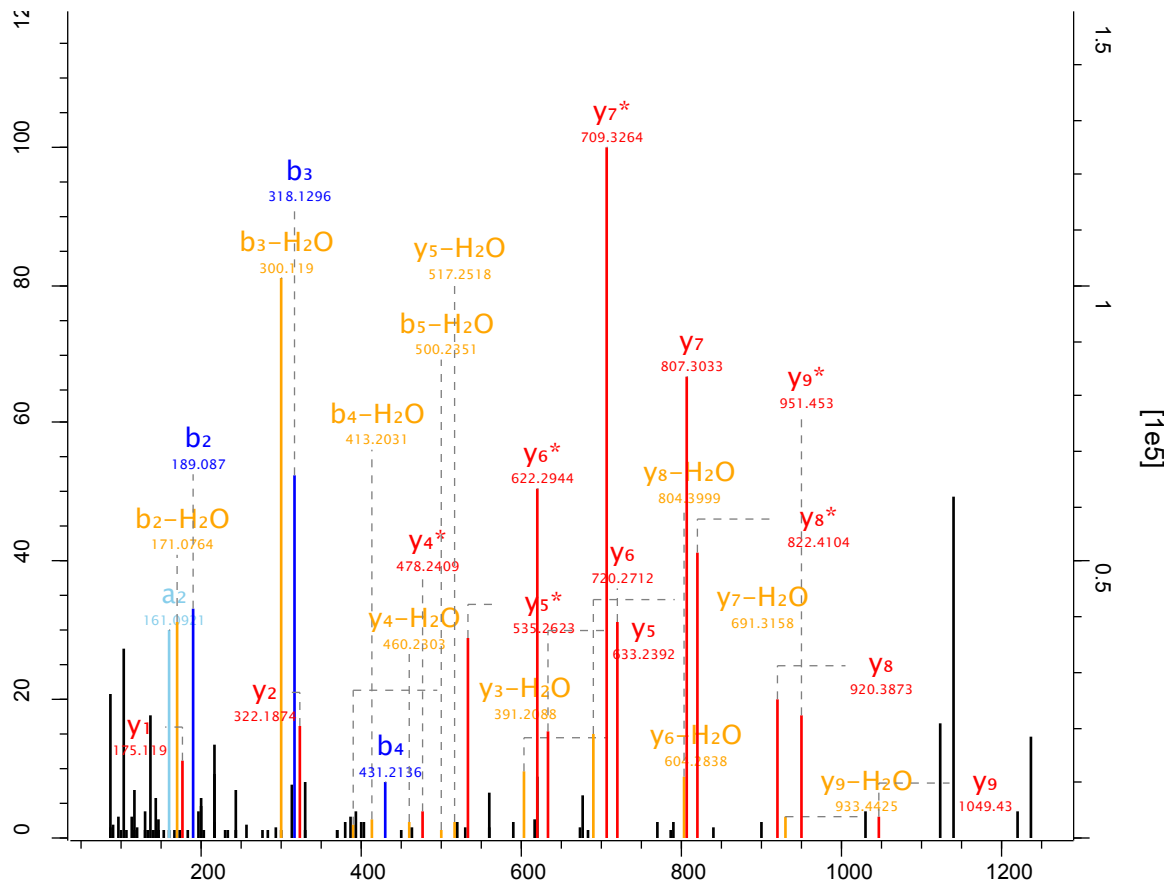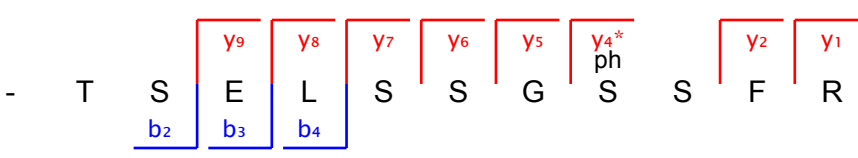



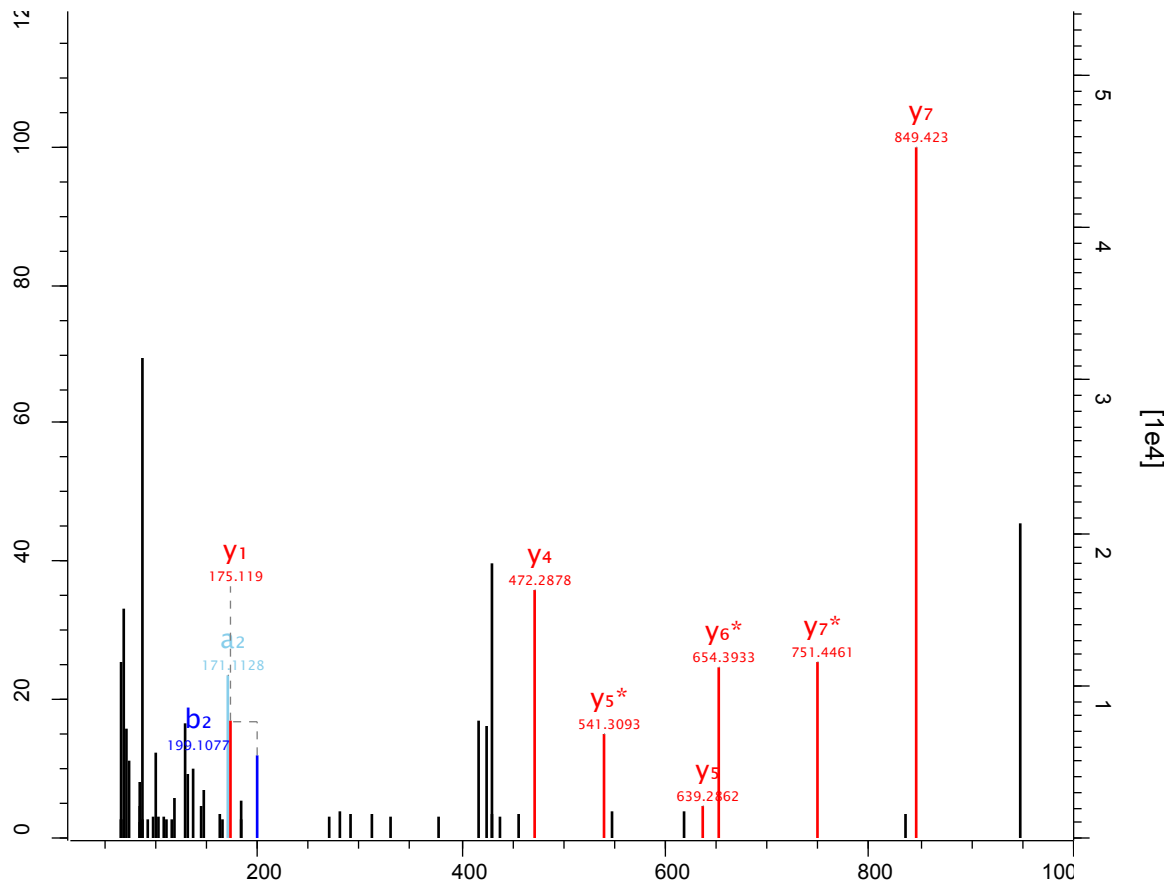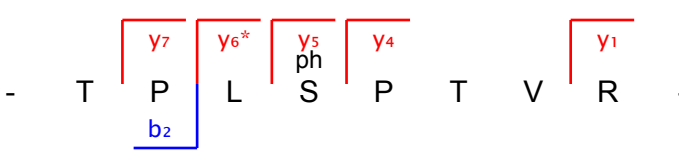

2013\_COL15\_34\_38\_151128201608

8307

FTMS; HCD

94.69

565.75

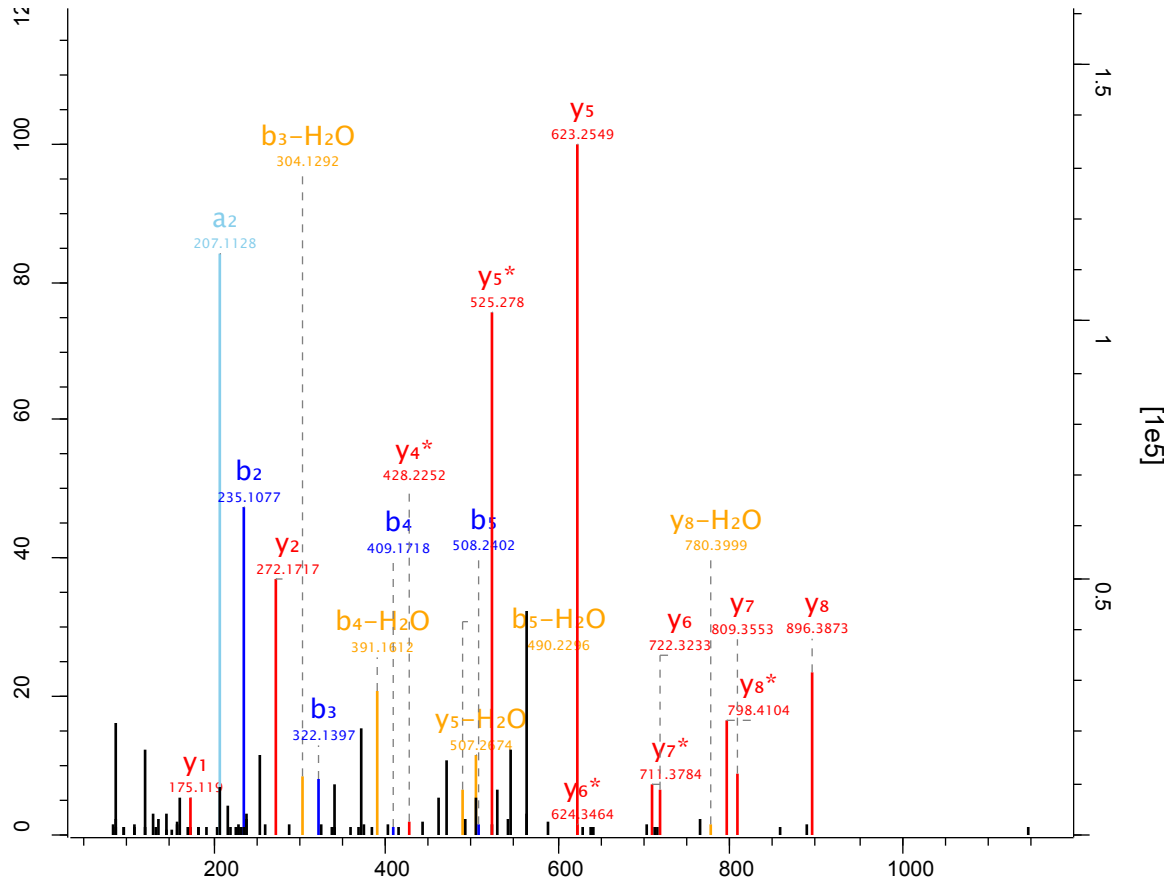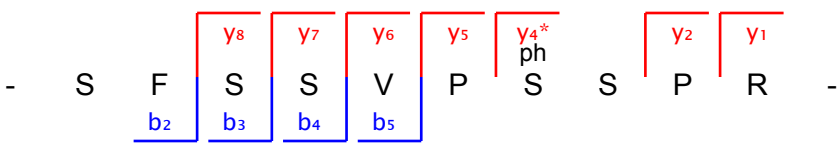

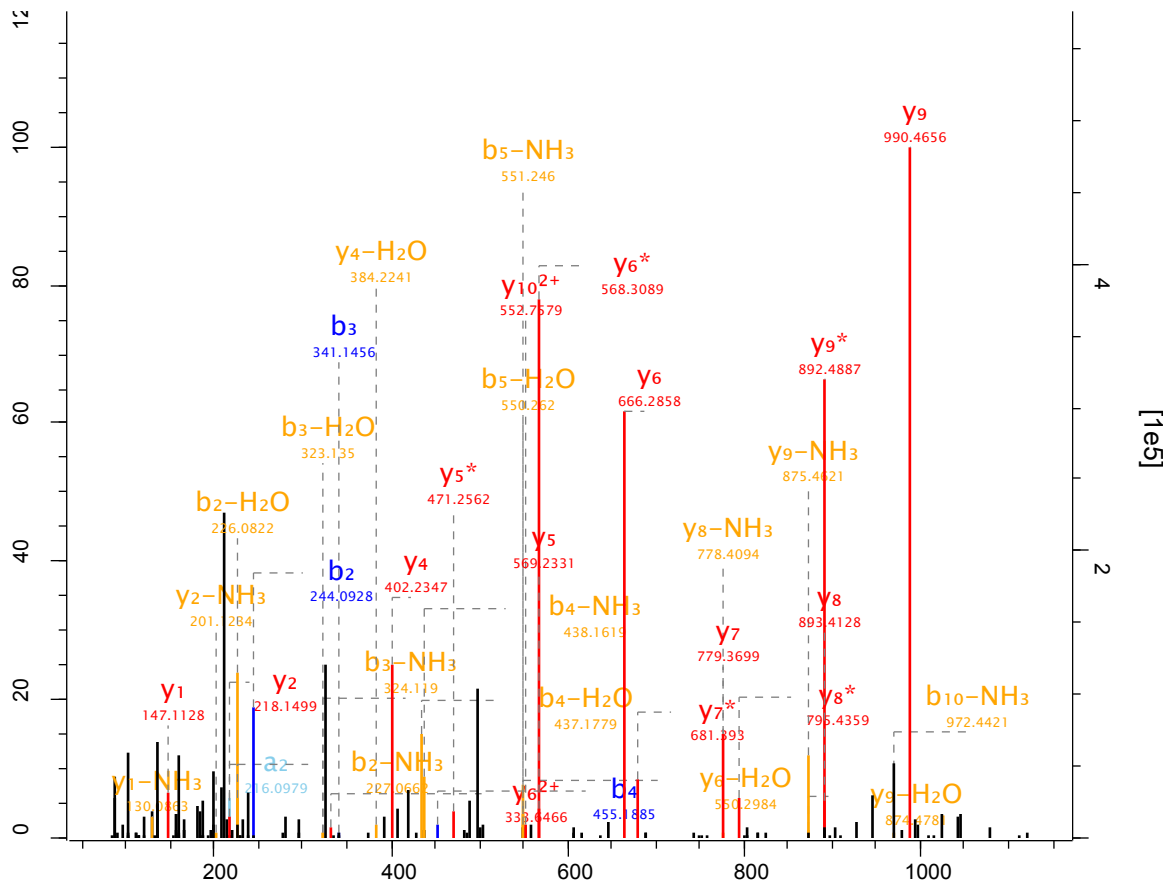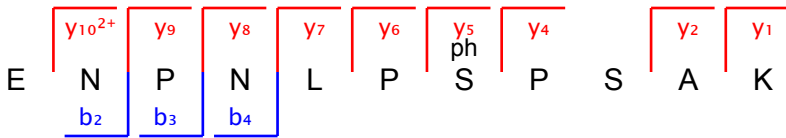

| Raw file                      | Scan | Method    | Score | m/z    |
|-------------------------------|------|-----------|-------|--------|
| 2013_COL15_34_38_151128201608 | 8336 | FTMS; HCD | 51.45 | 505.24 |

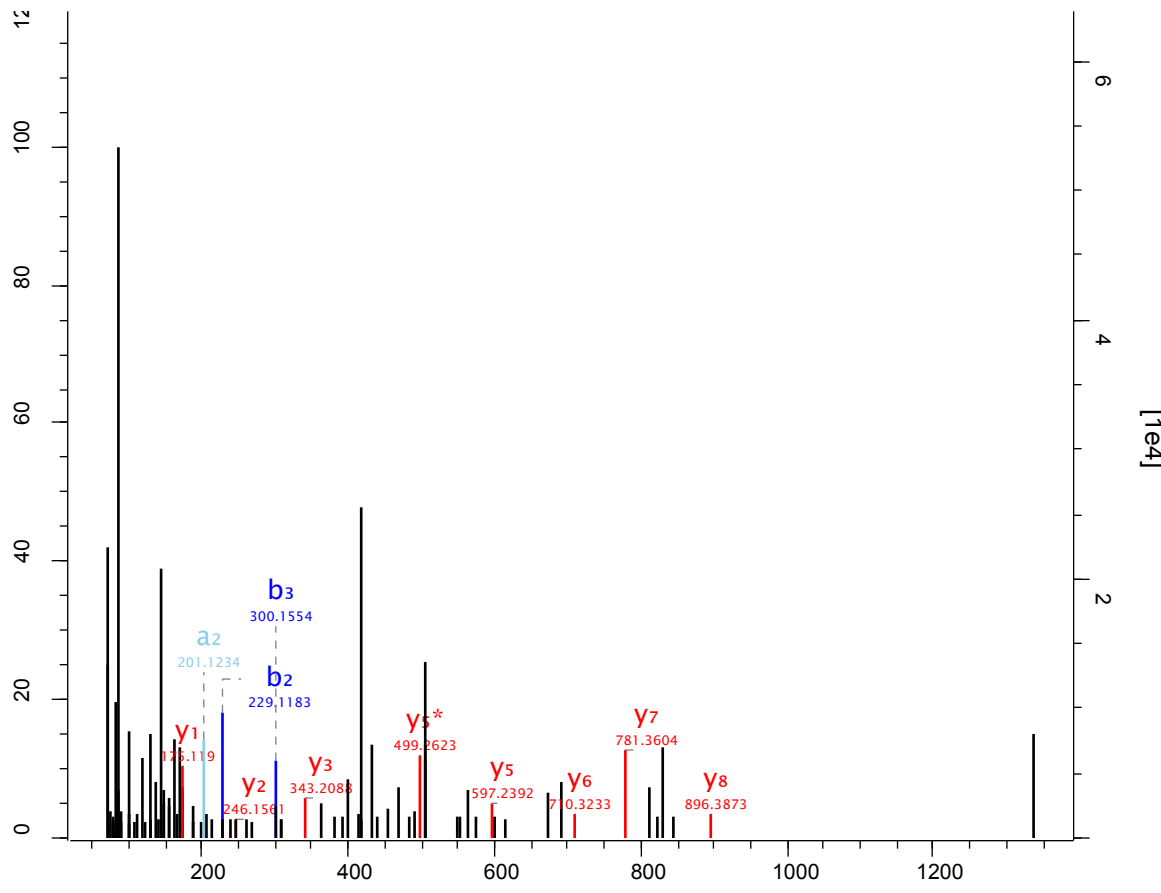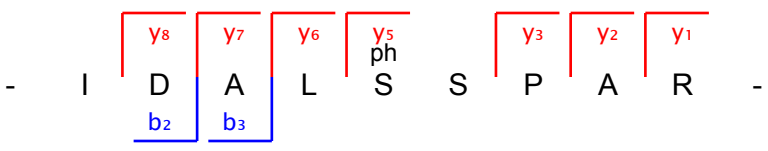

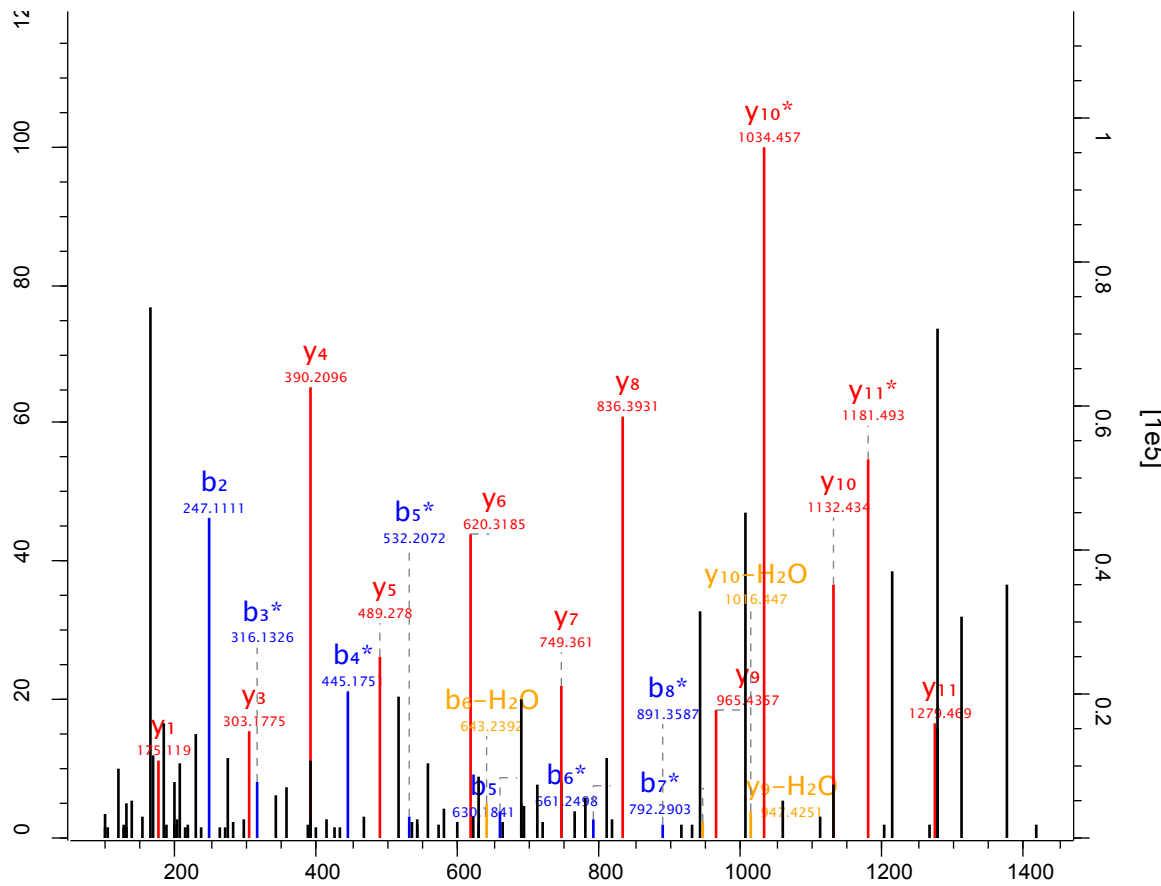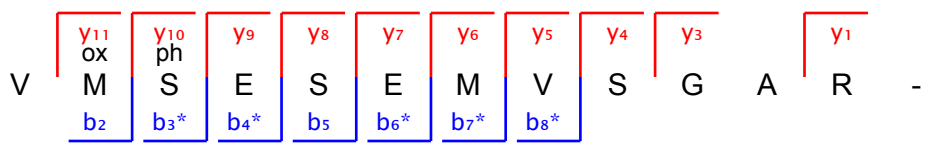

Raw file

Scan

Method

Score

m/z

2013\_COL15\_34\_38\_151128201608

8529

FTMS; HCD

45.28

498.74

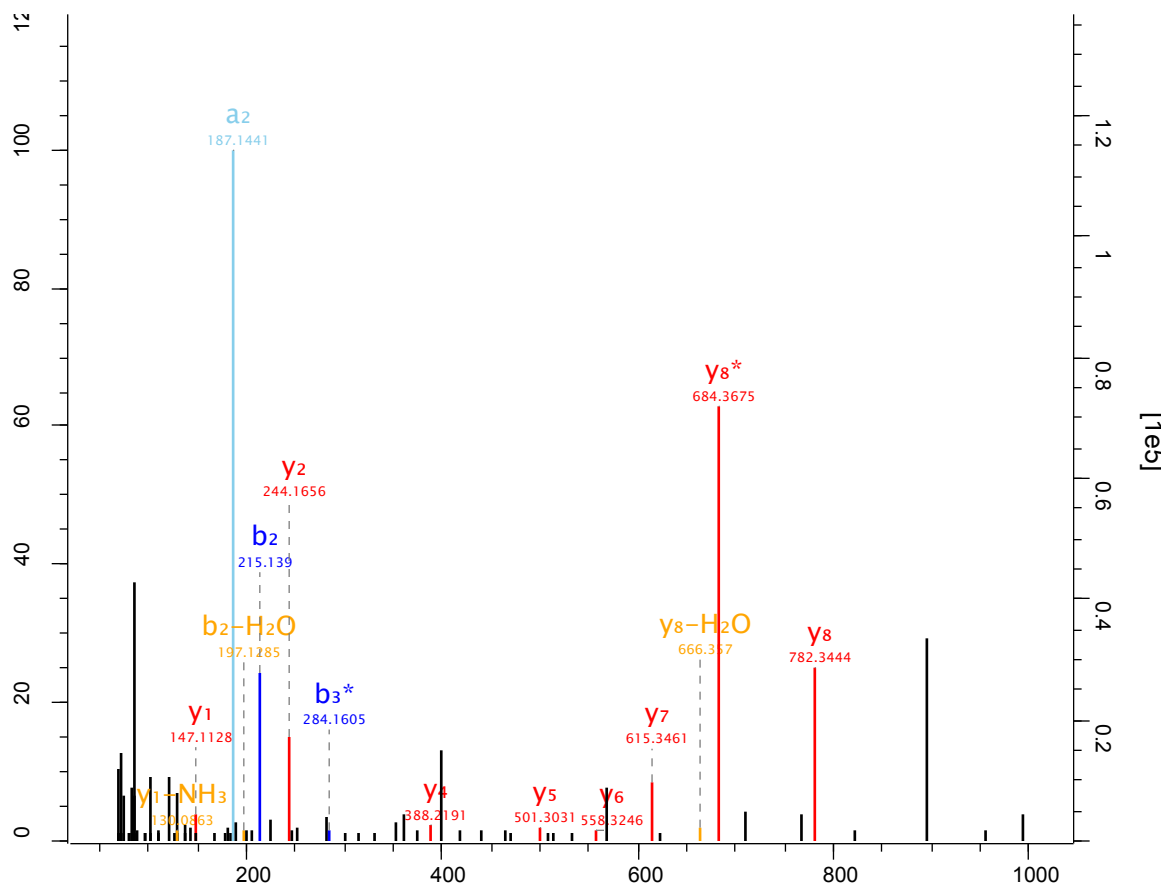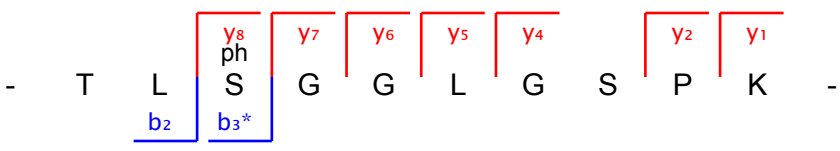

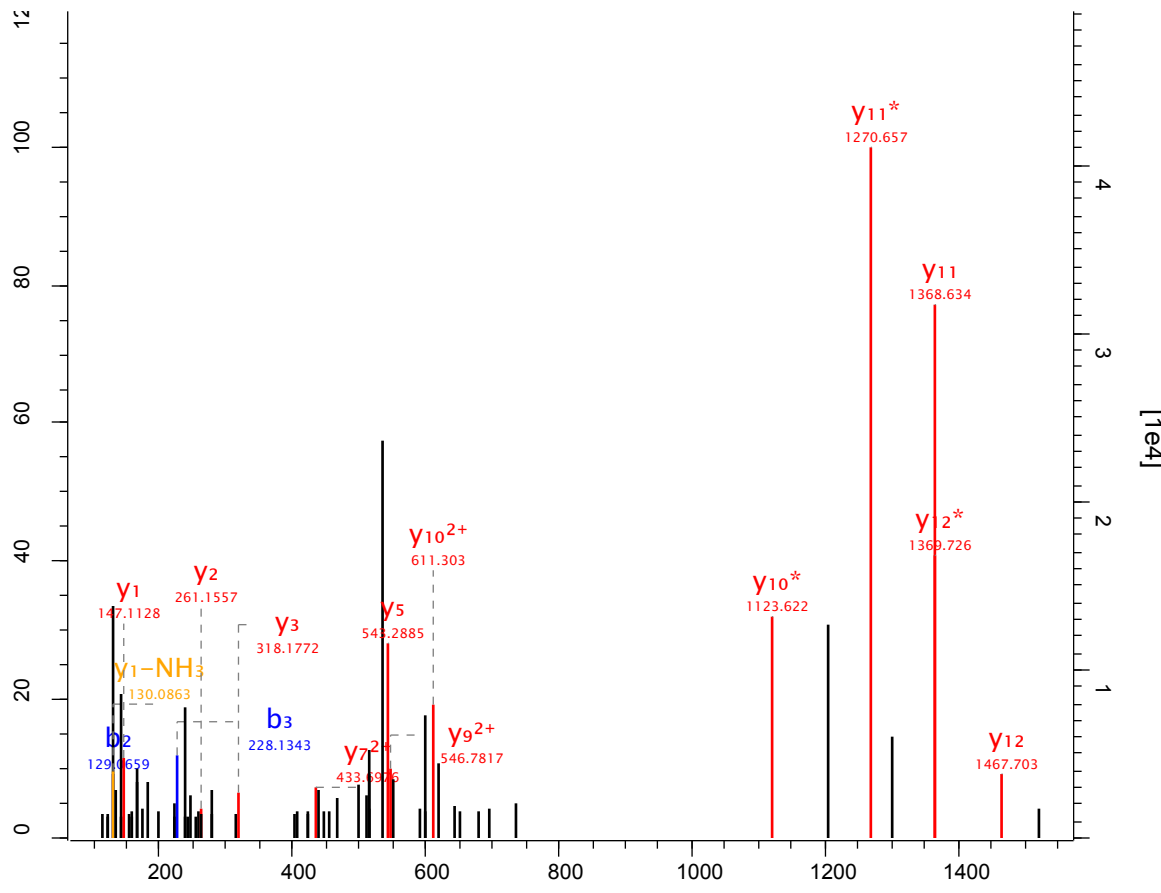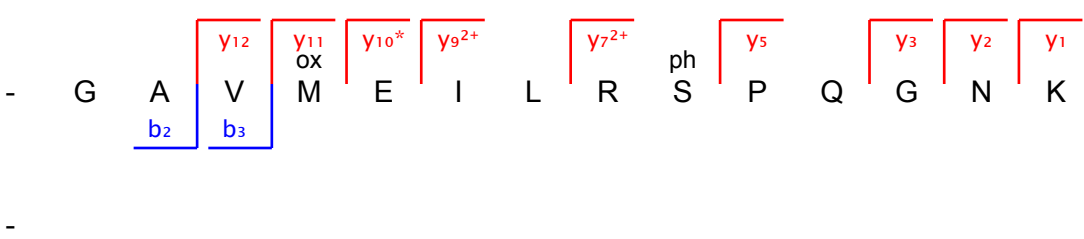

Raw file Scan Method Score m/z  
 2013\_COL15\_34\_38\_151128201608 8581 FTMS; HCD 58.71 472.23

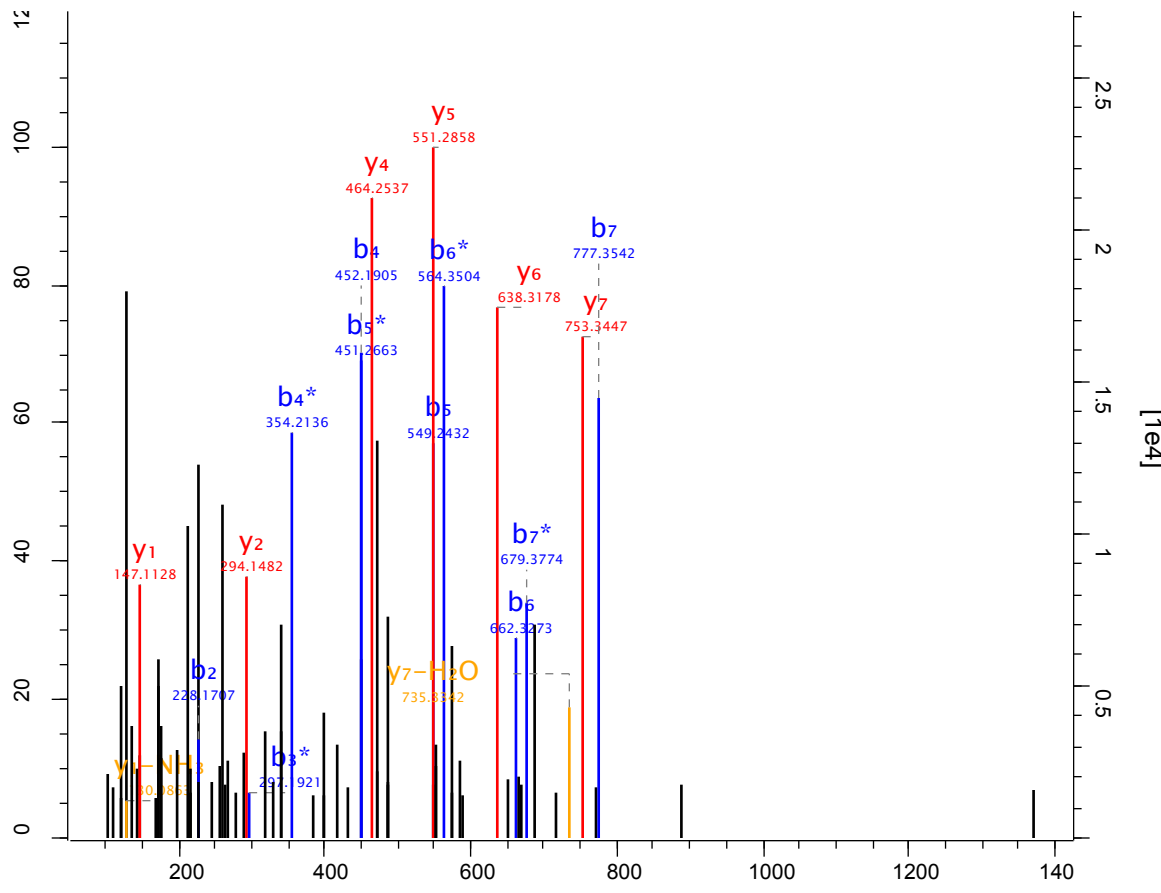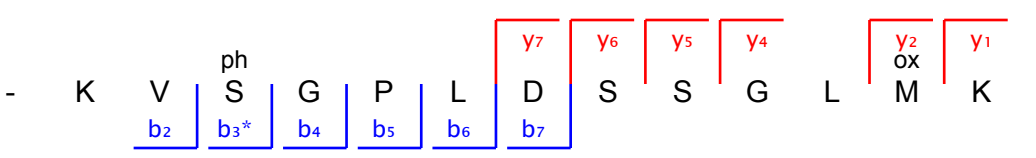



2013\_COL15\_34\_38\_151128201608

8618

FTMS; HCD

85.54

577.27

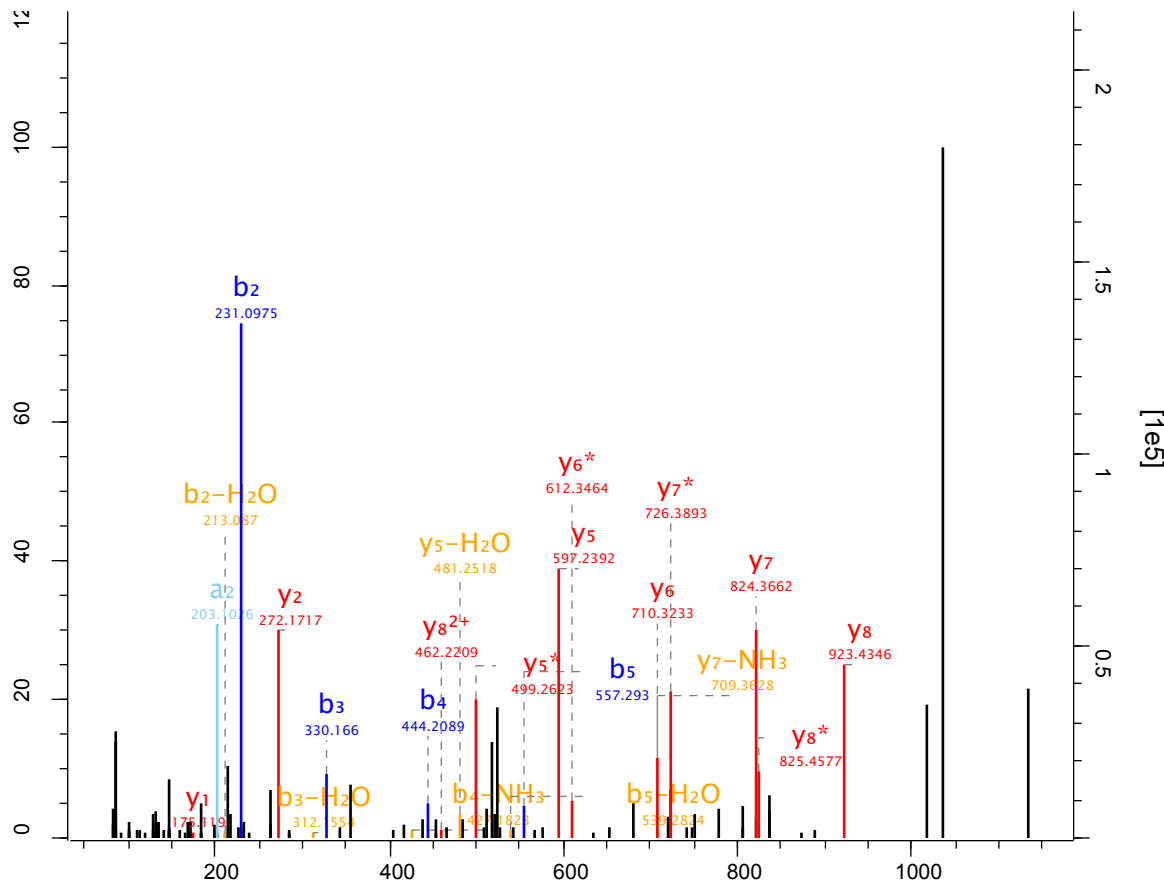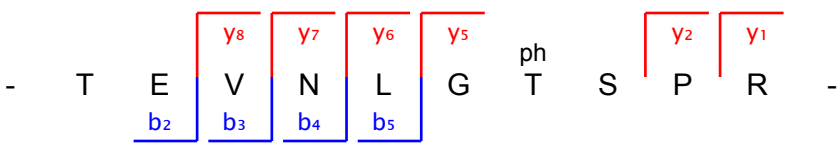

2013\_COL15\_34\_38\_151128201608

8661

FTMS; HCD

46.54

751.77

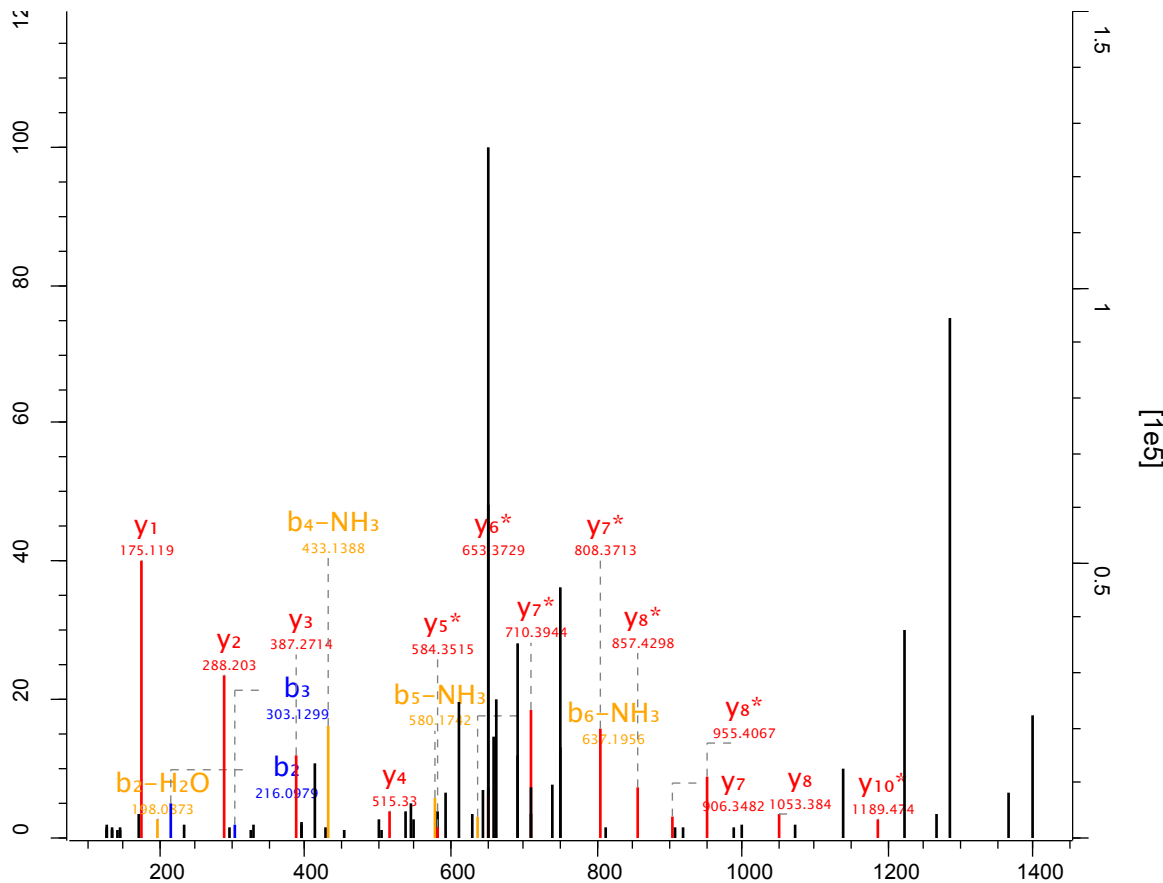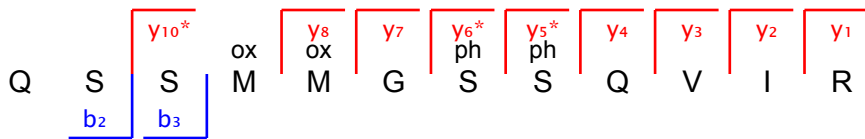

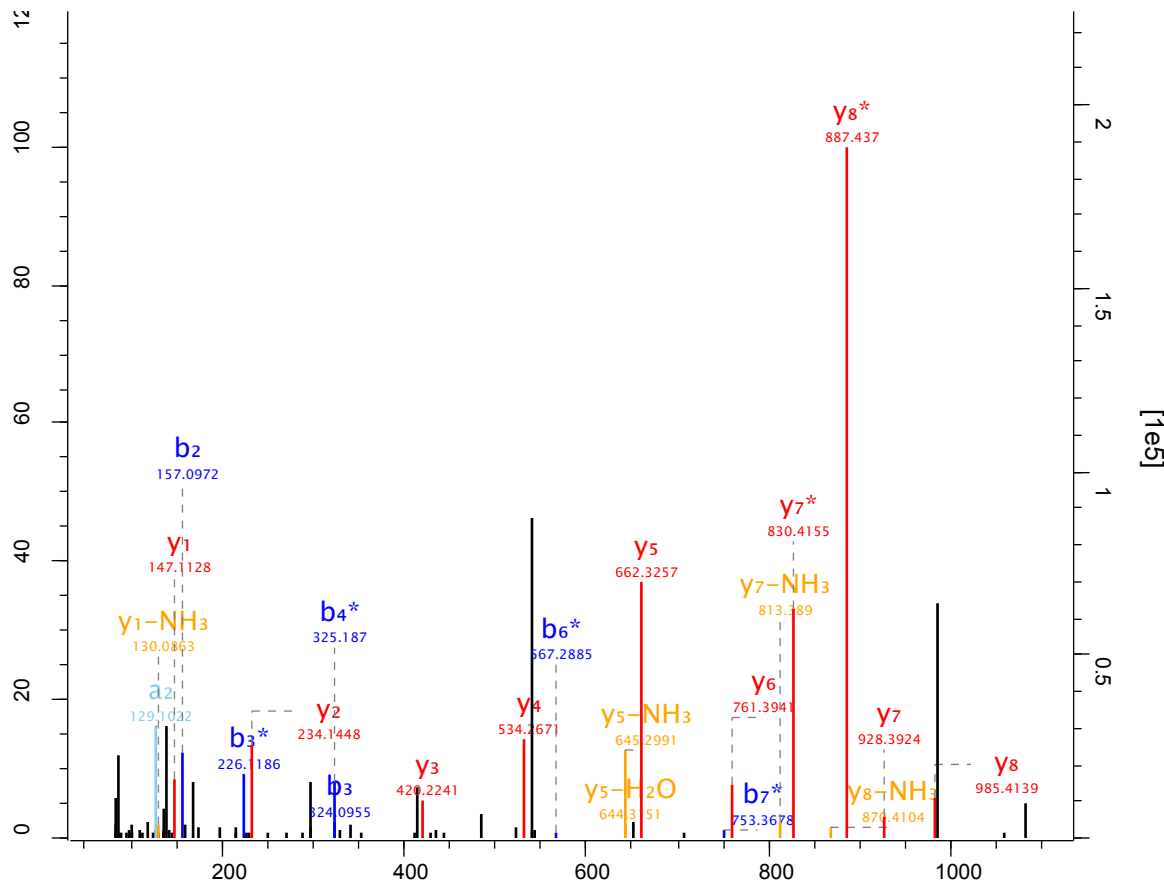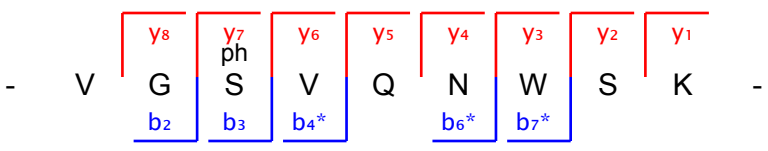



Raw file Scan Method Score m/z  
 2013\_COL15\_34\_38\_151128201608 8860 FTMS; HCD 68.54 559.74

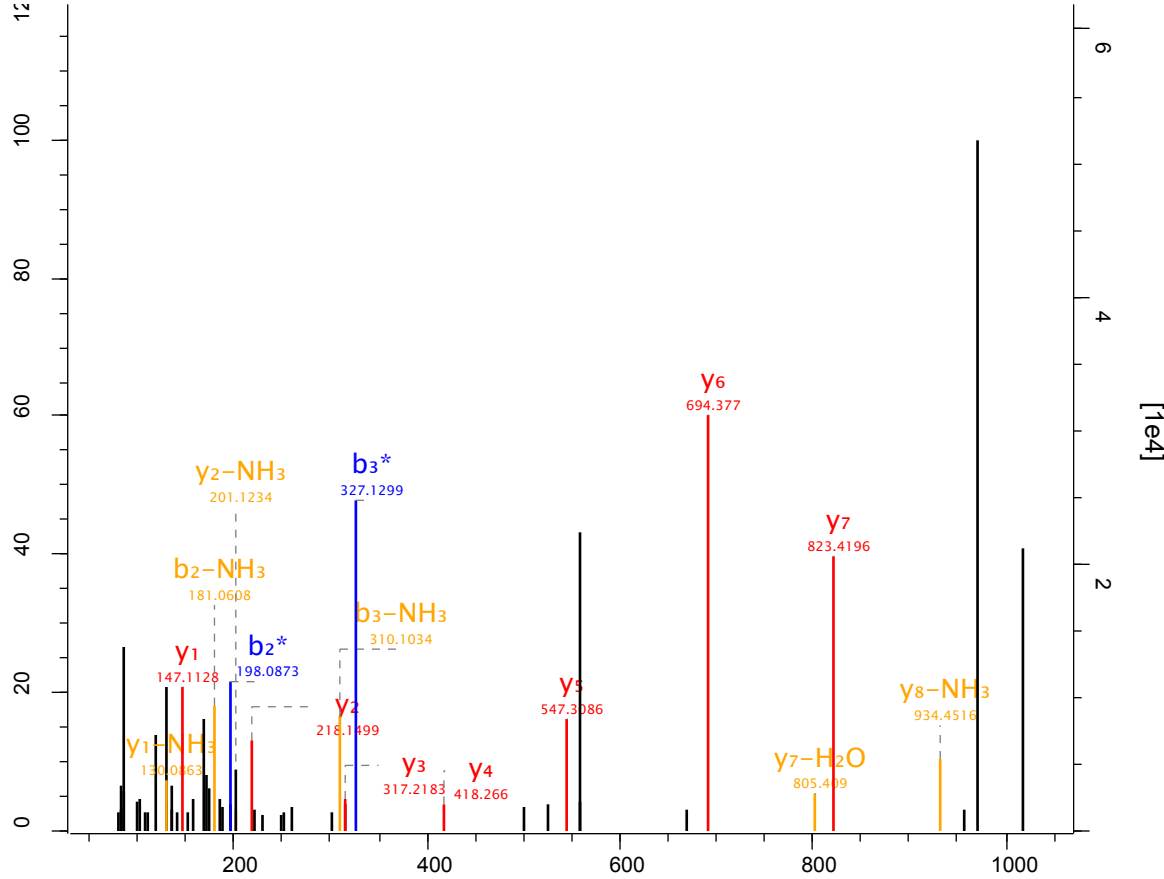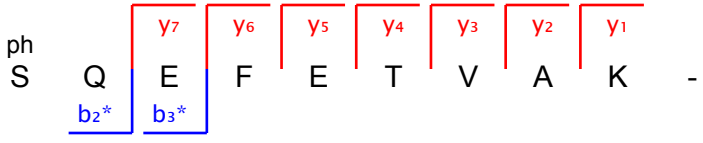

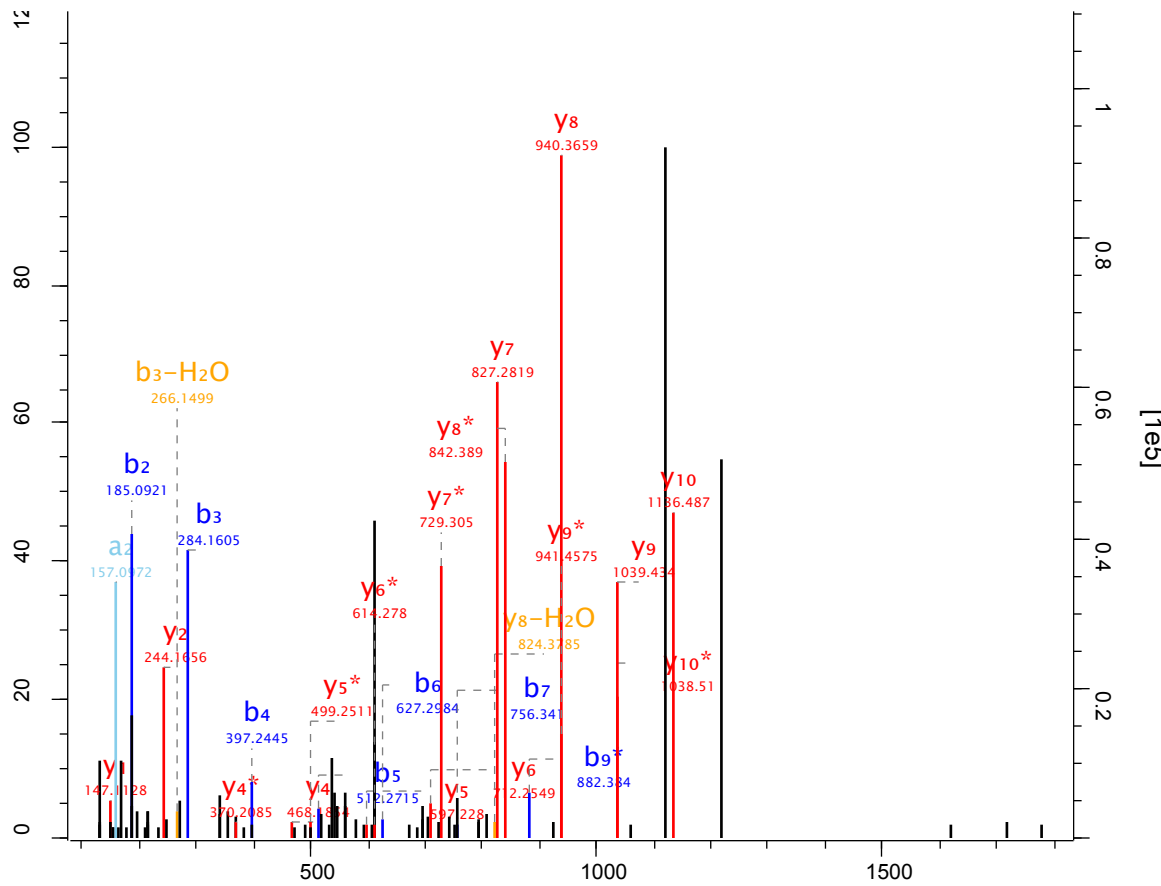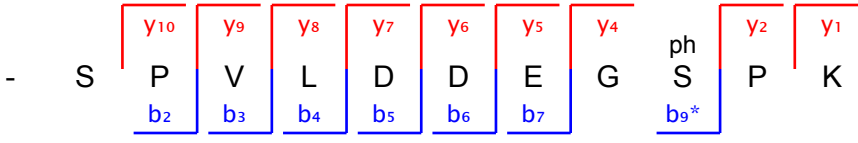

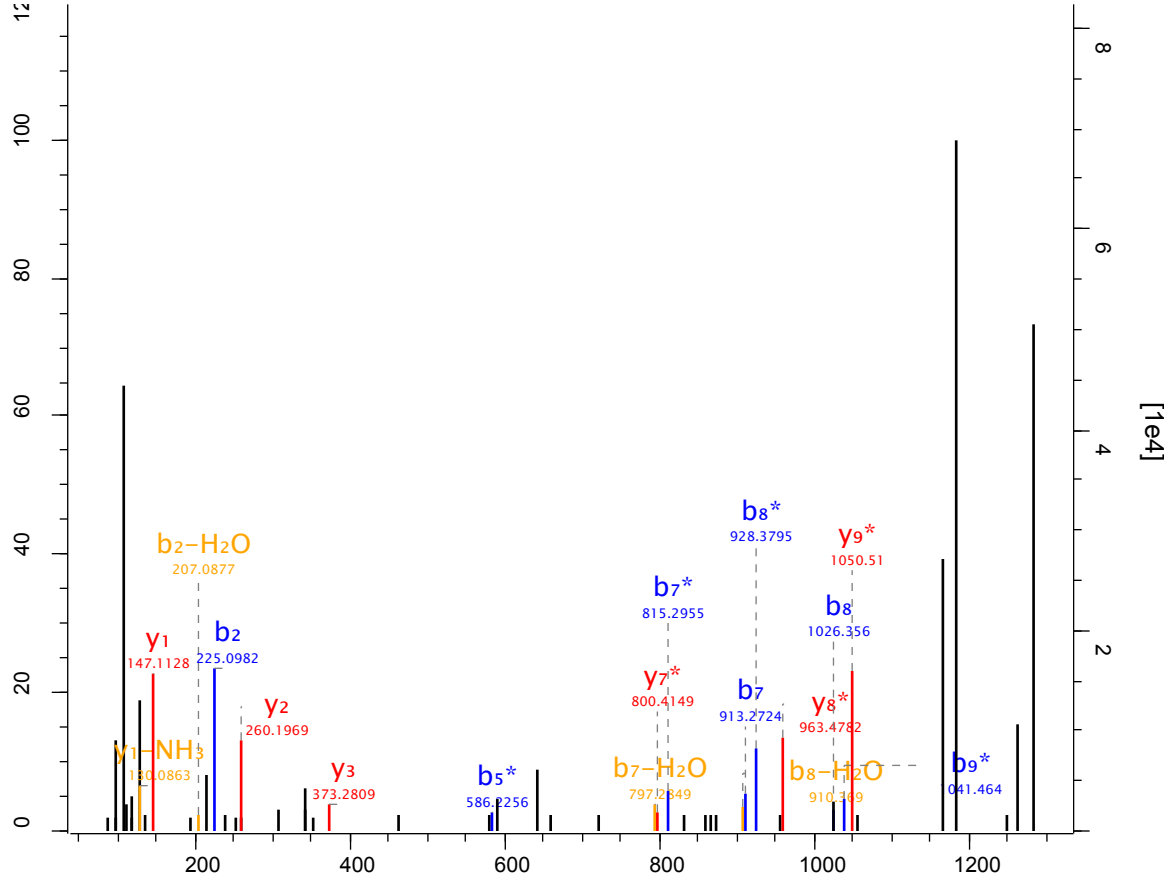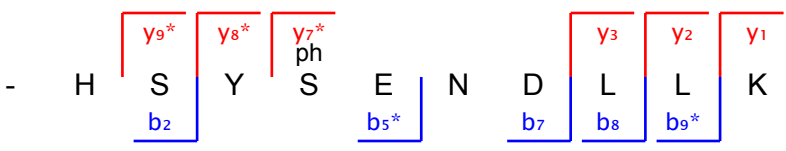

| Raw file                      | Scan | Method    | Score | m/z    |
|-------------------------------|------|-----------|-------|--------|
| 2013_COL15_34_38_151128201608 | 9394 | FTMS; HCD | 80.96 | 590.29 |

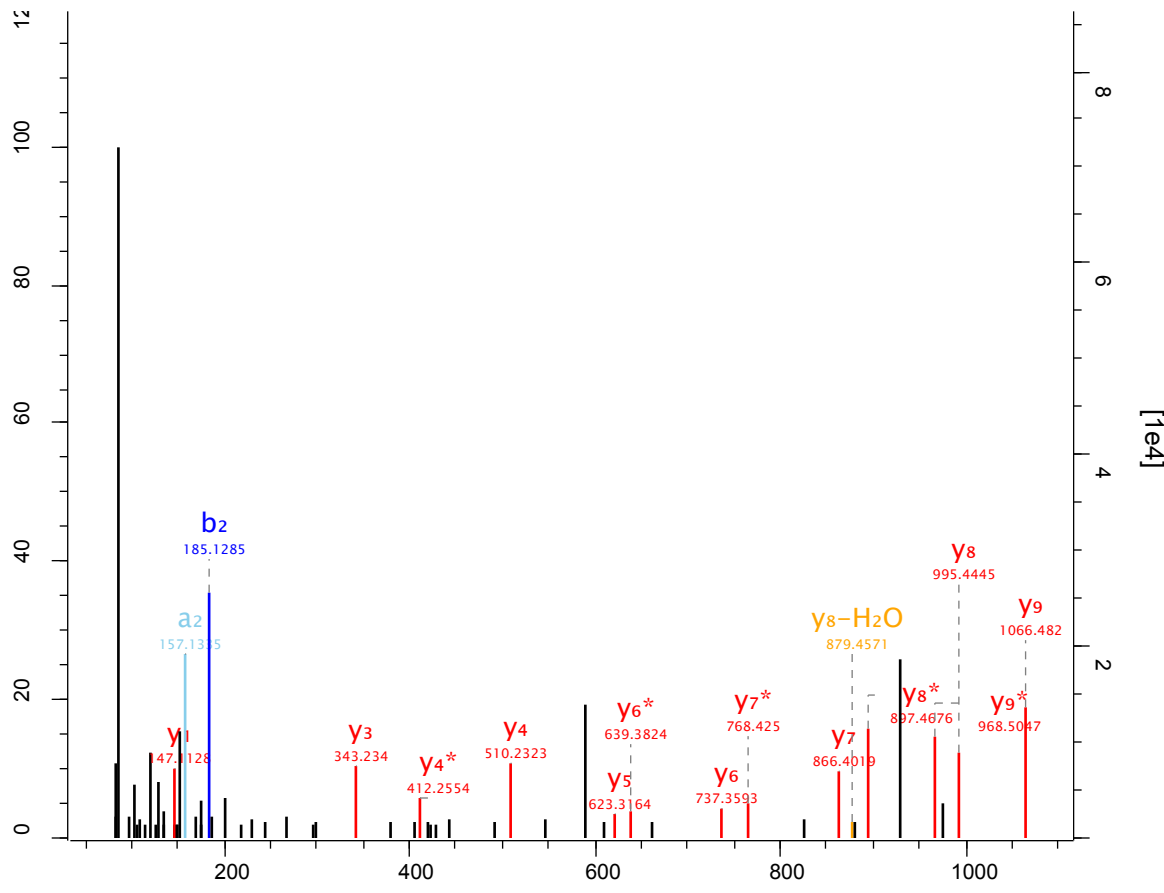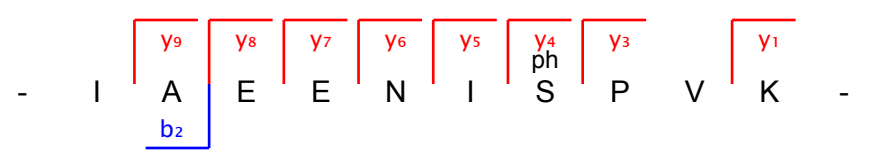



| Raw file                      | Scan | Method    | Score | m/z    |
|-------------------------------|------|-----------|-------|--------|
| 2013_COL15_34_38_151128201608 | 9401 | FTMS; HCD | 59.37 | 493.89 |

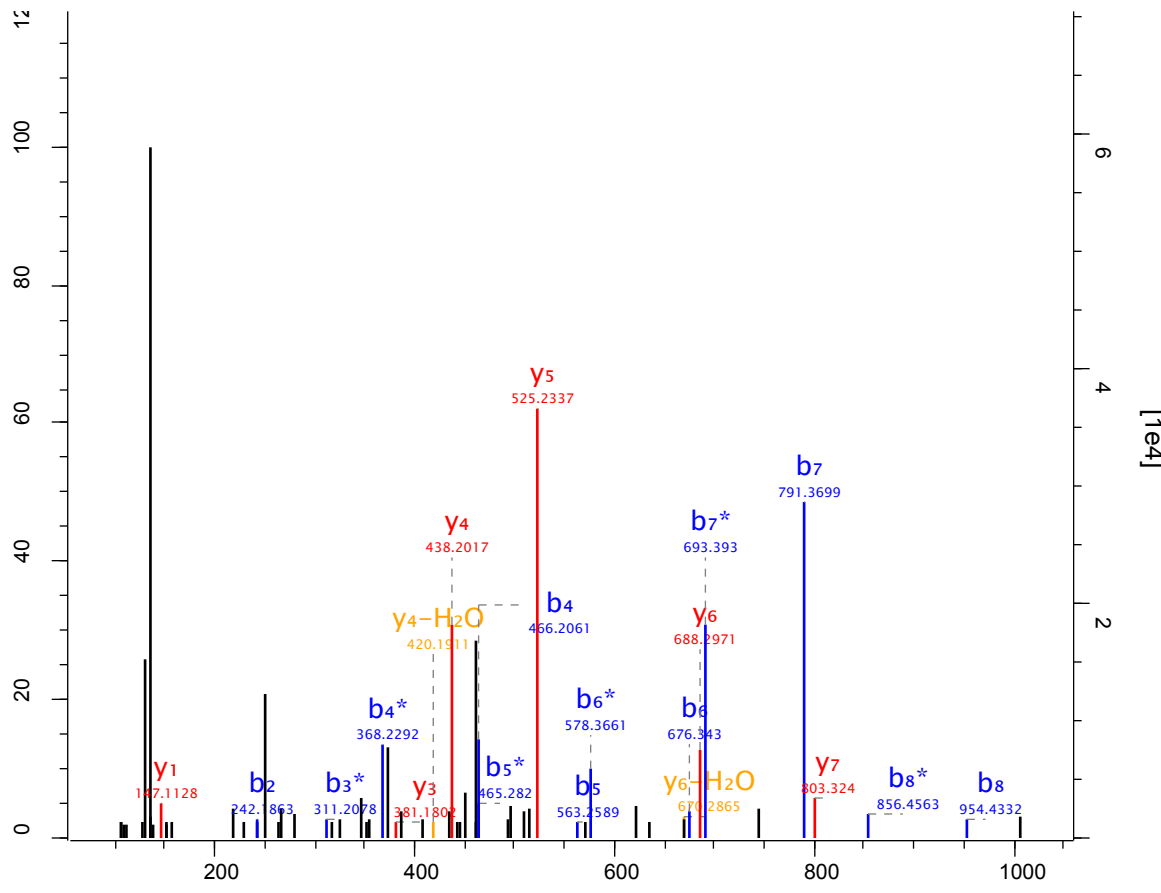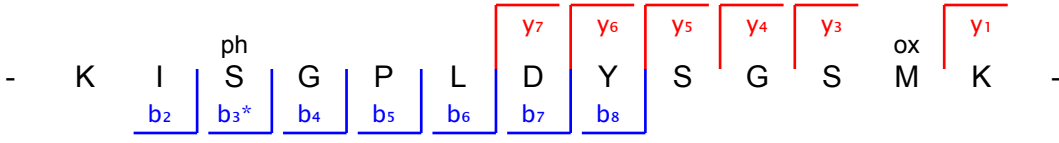

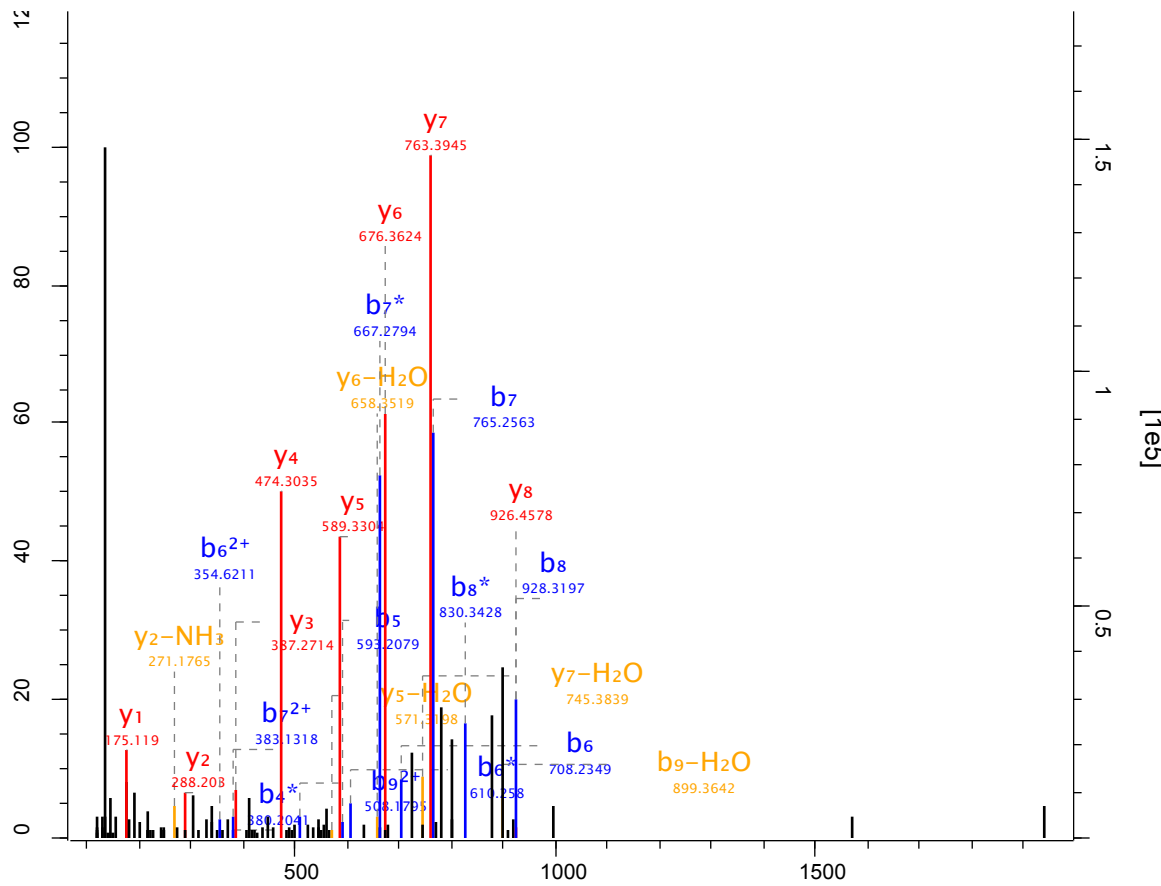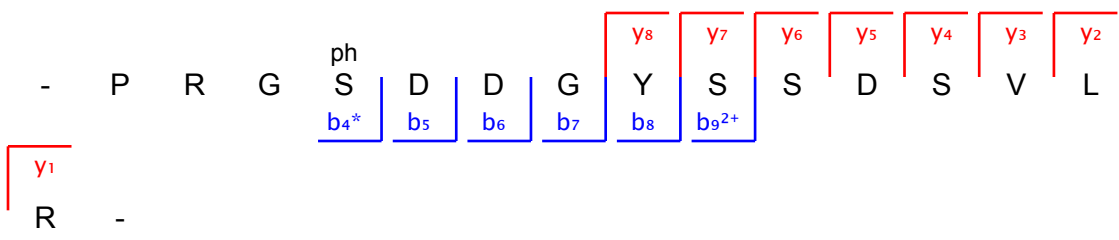

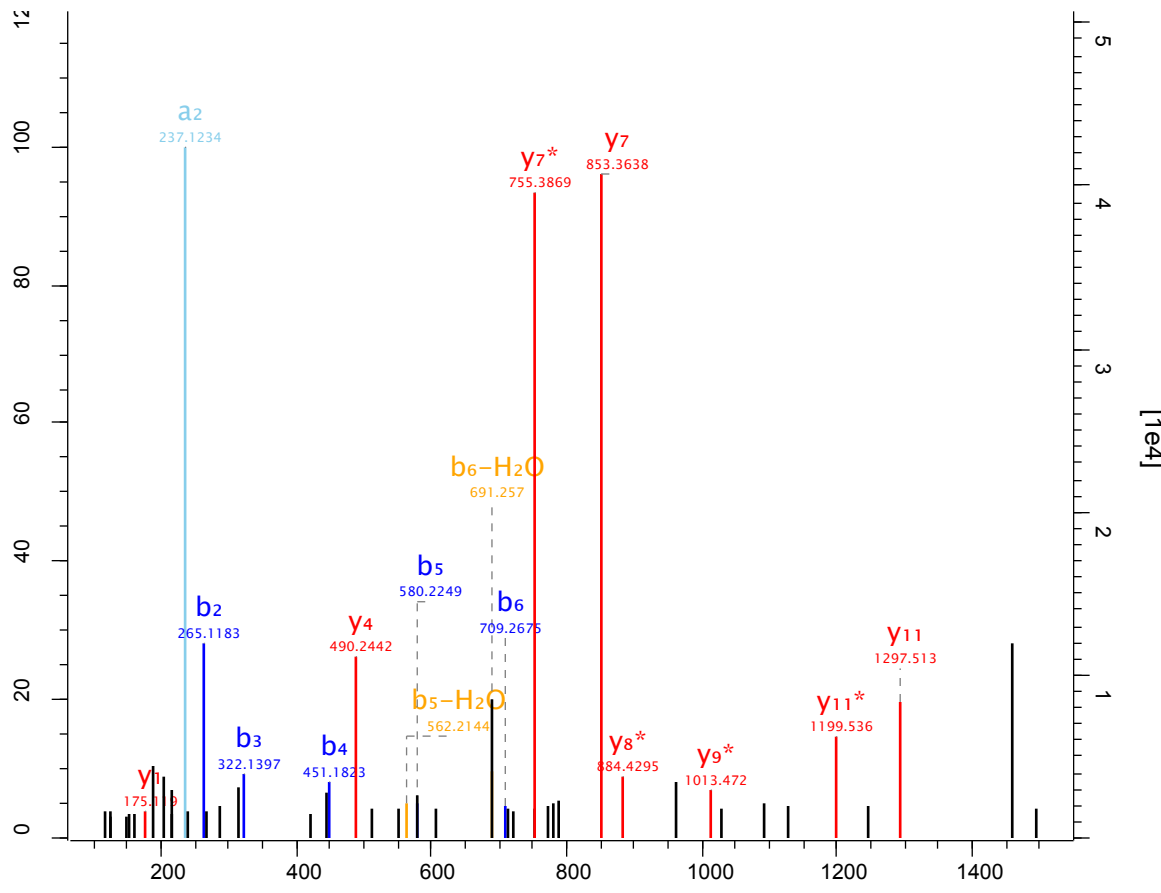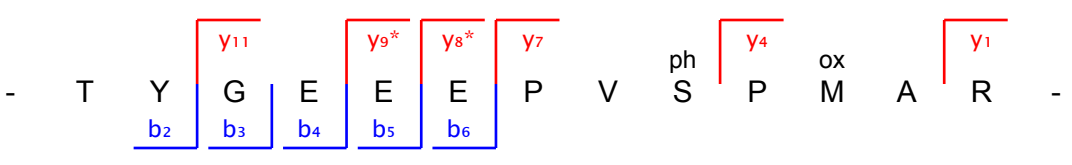

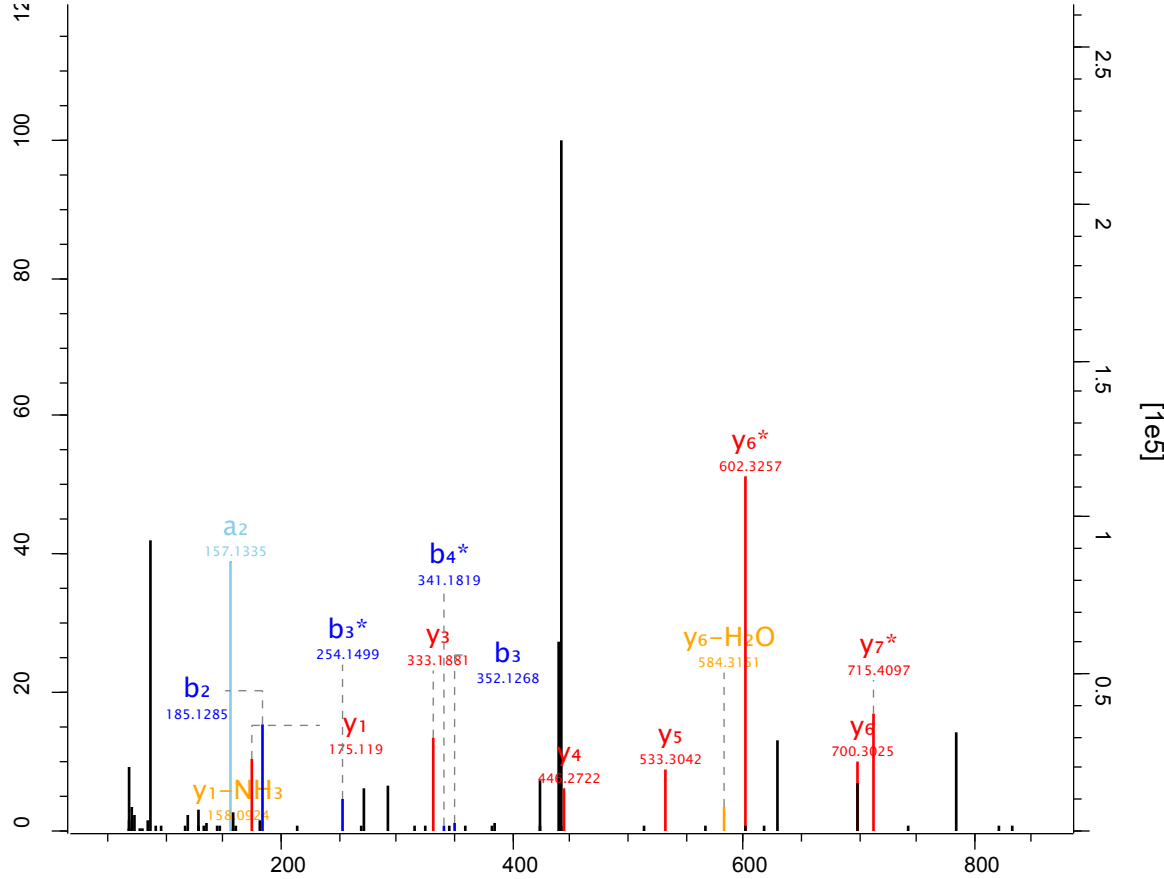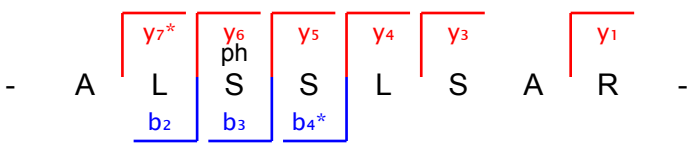

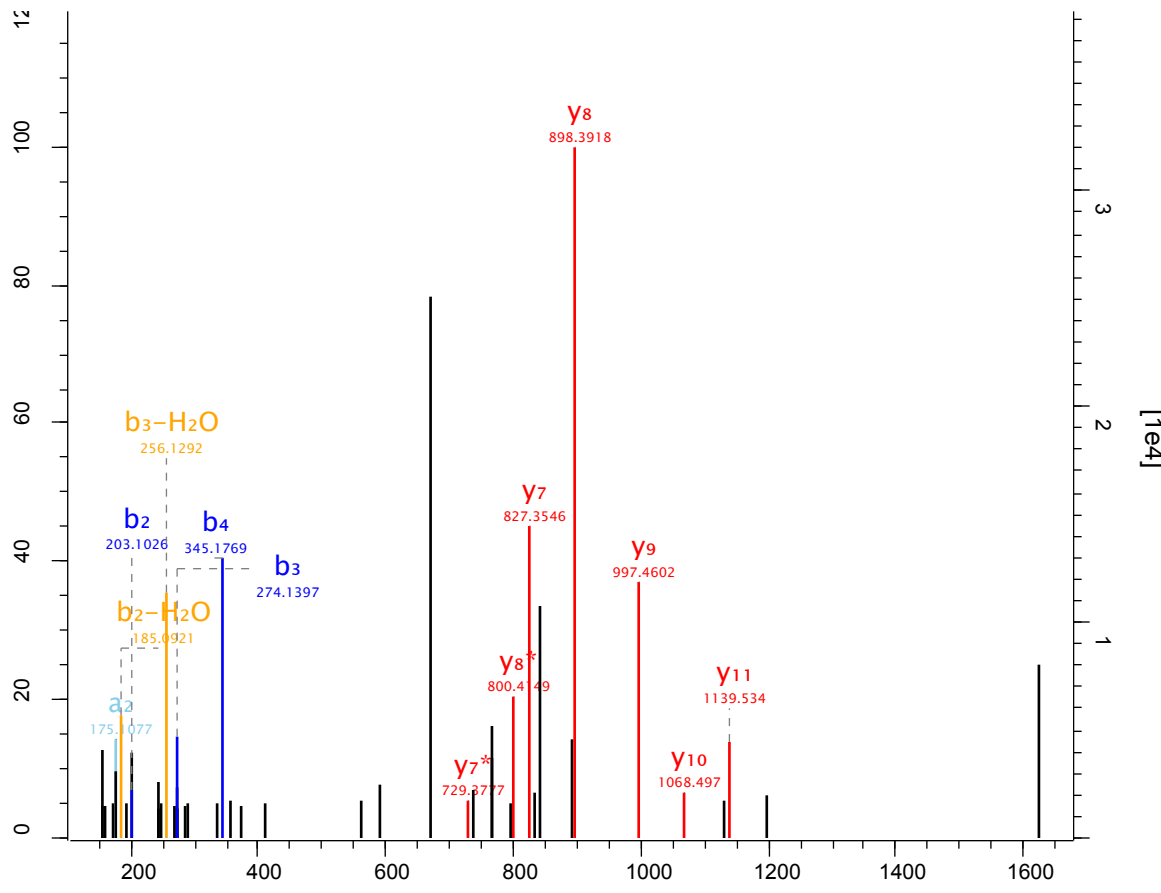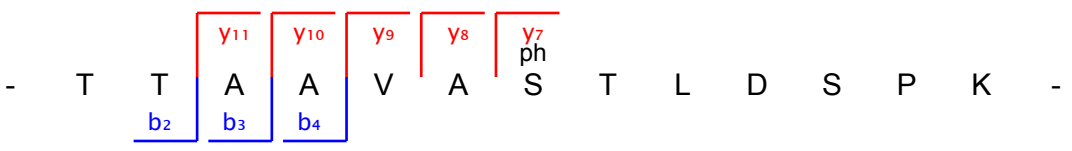

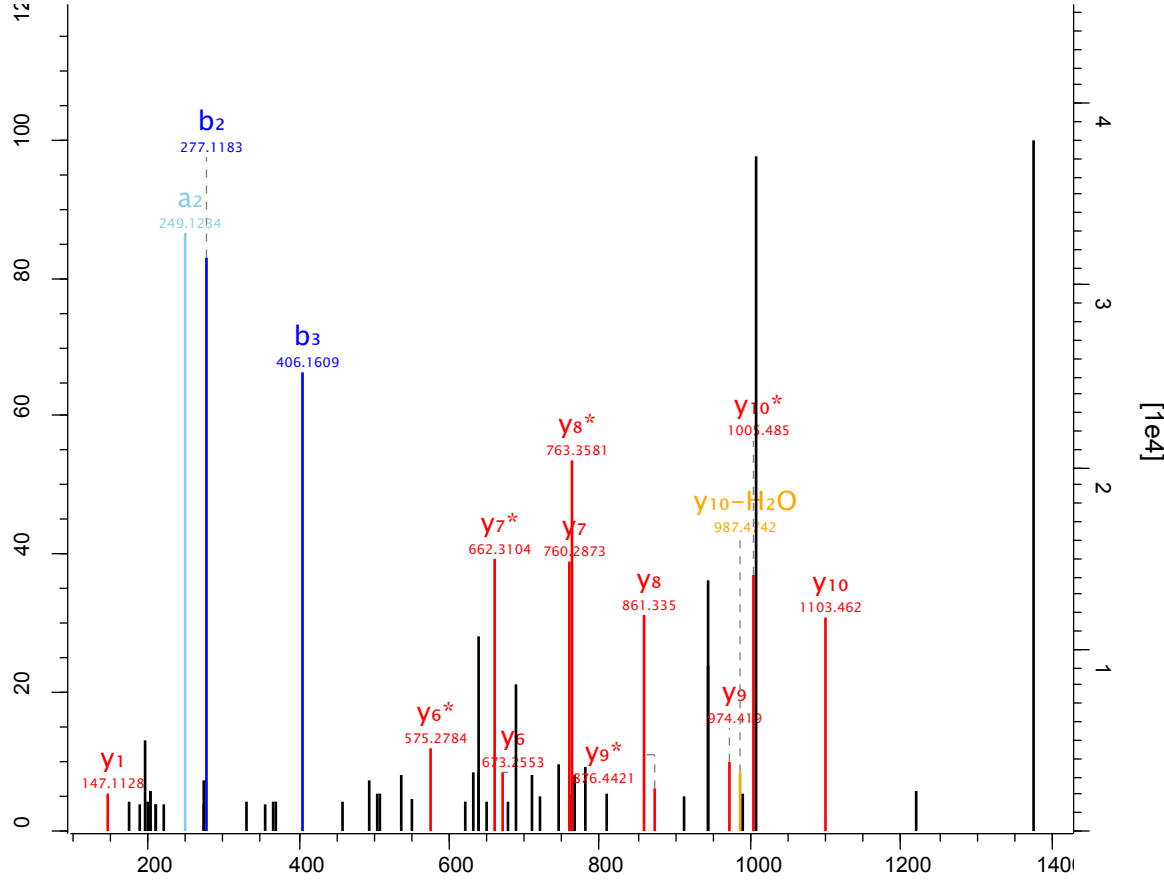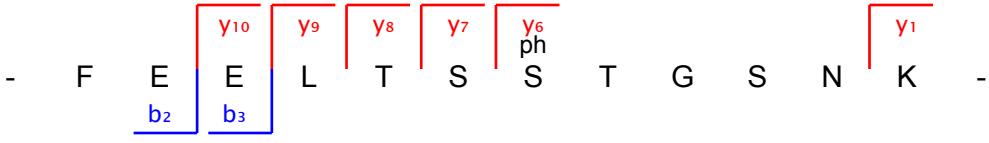



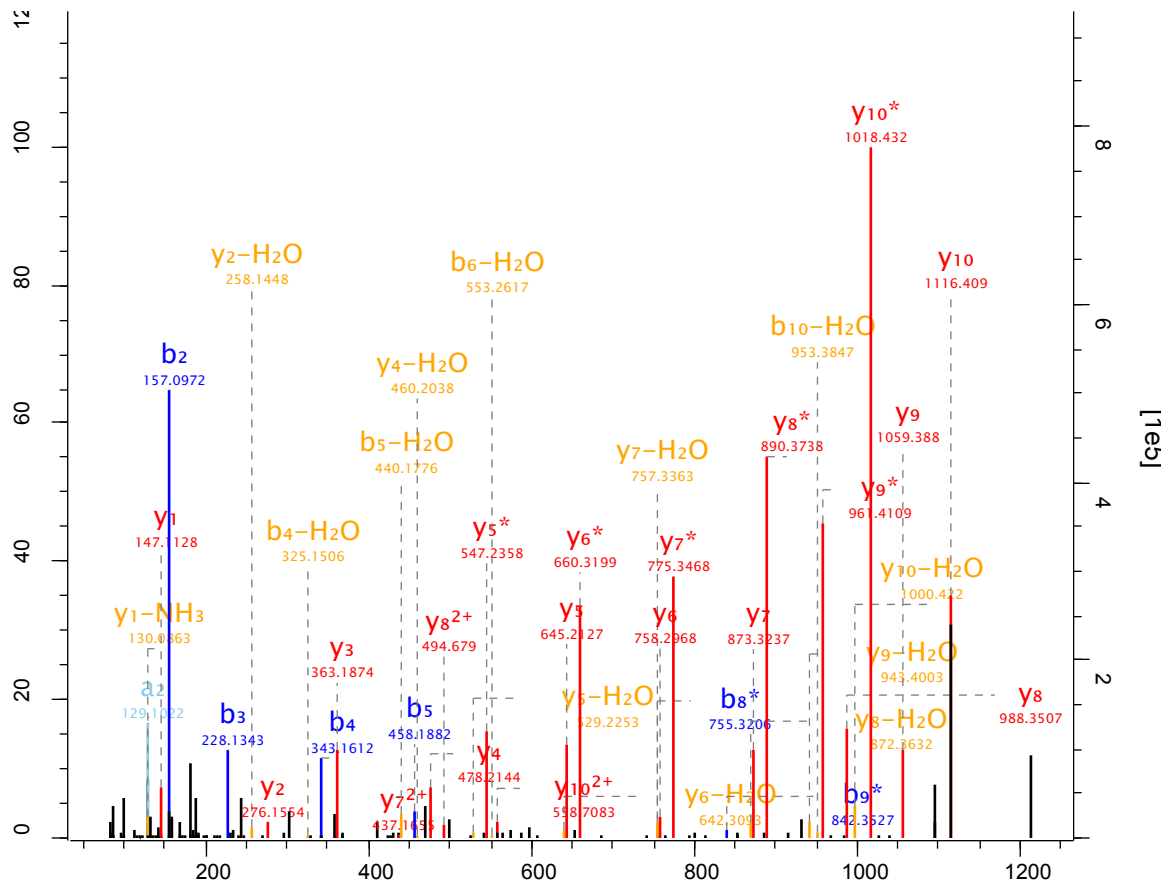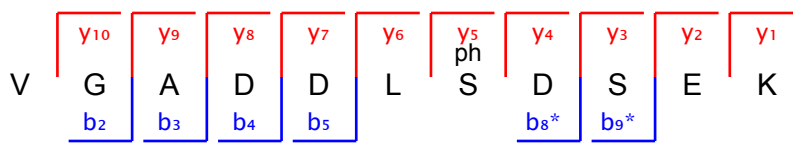



Raw file 2013\_COL15\_34\_38\_151128201608 Scan 9740 Method FTMS; HCD Score 88.56 m/z 605.31

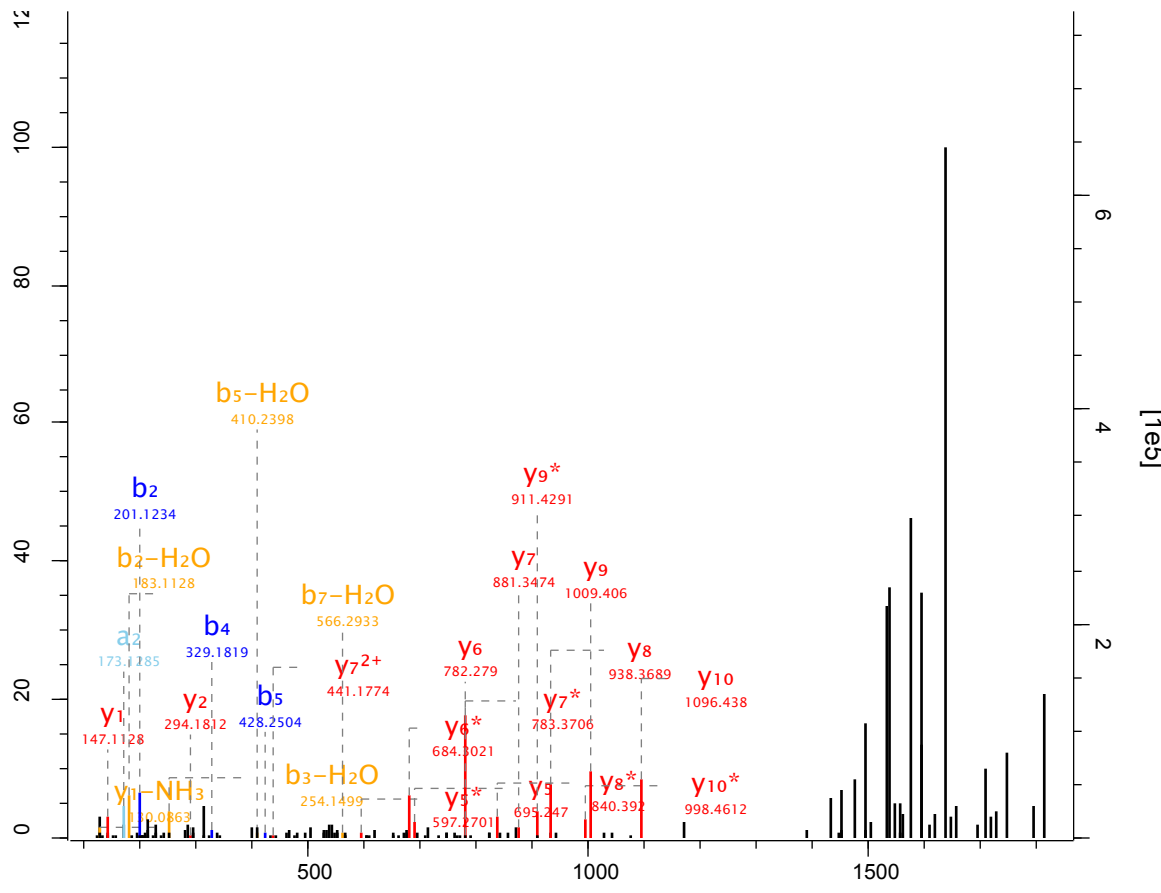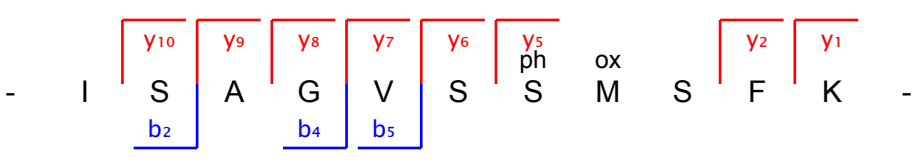

Raw file  
2013\_COL15\_34\_38\_151128201608

Scan  
9753  
Method  
FTMS; HCD

Score  
61.44  
m/z  
647.82

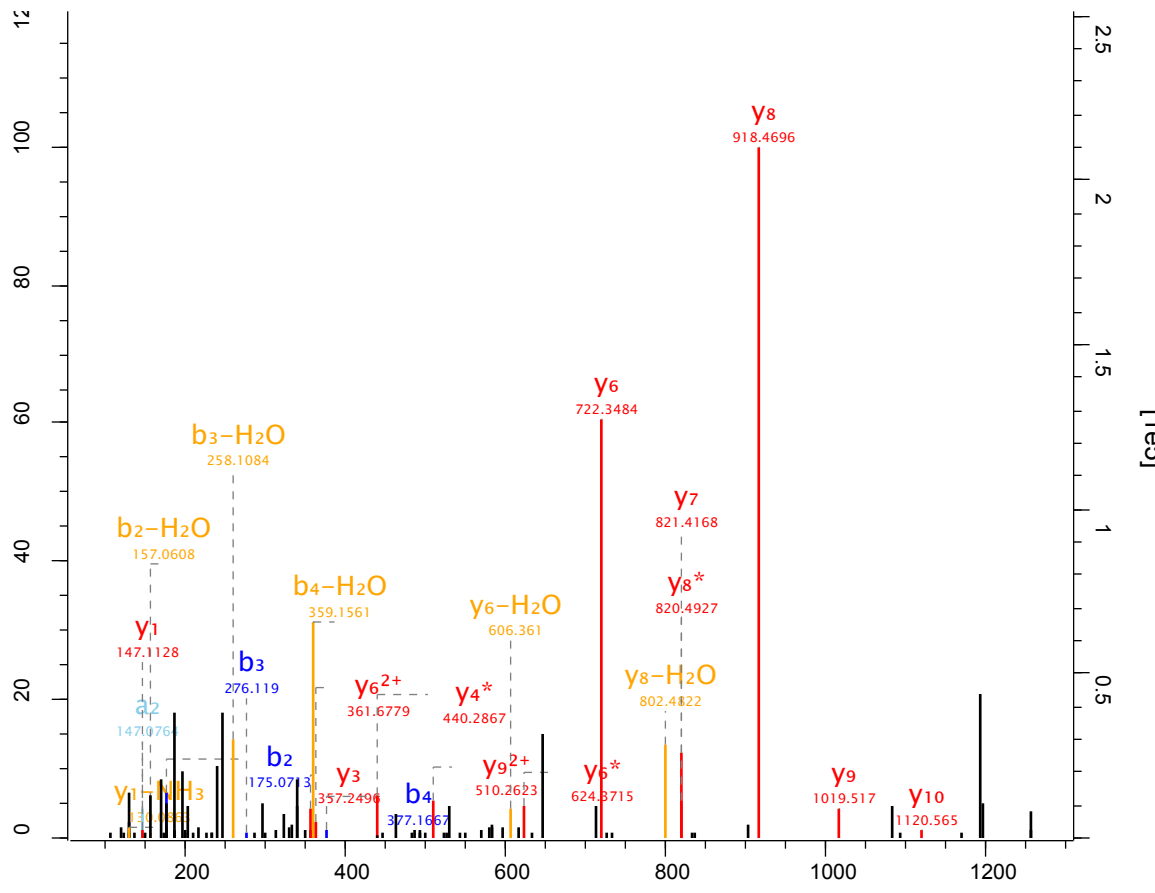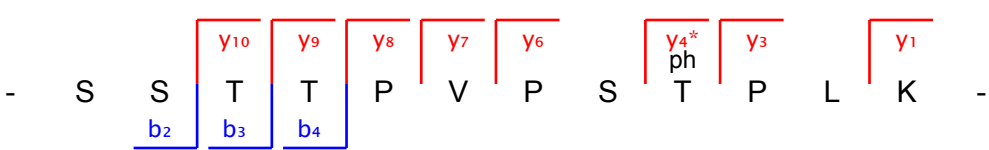

Raw file 2013\_COL15\_34\_38\_151128201608 Scan 9769 Method FTMS; HCD Score 113.88 m/z 713.32

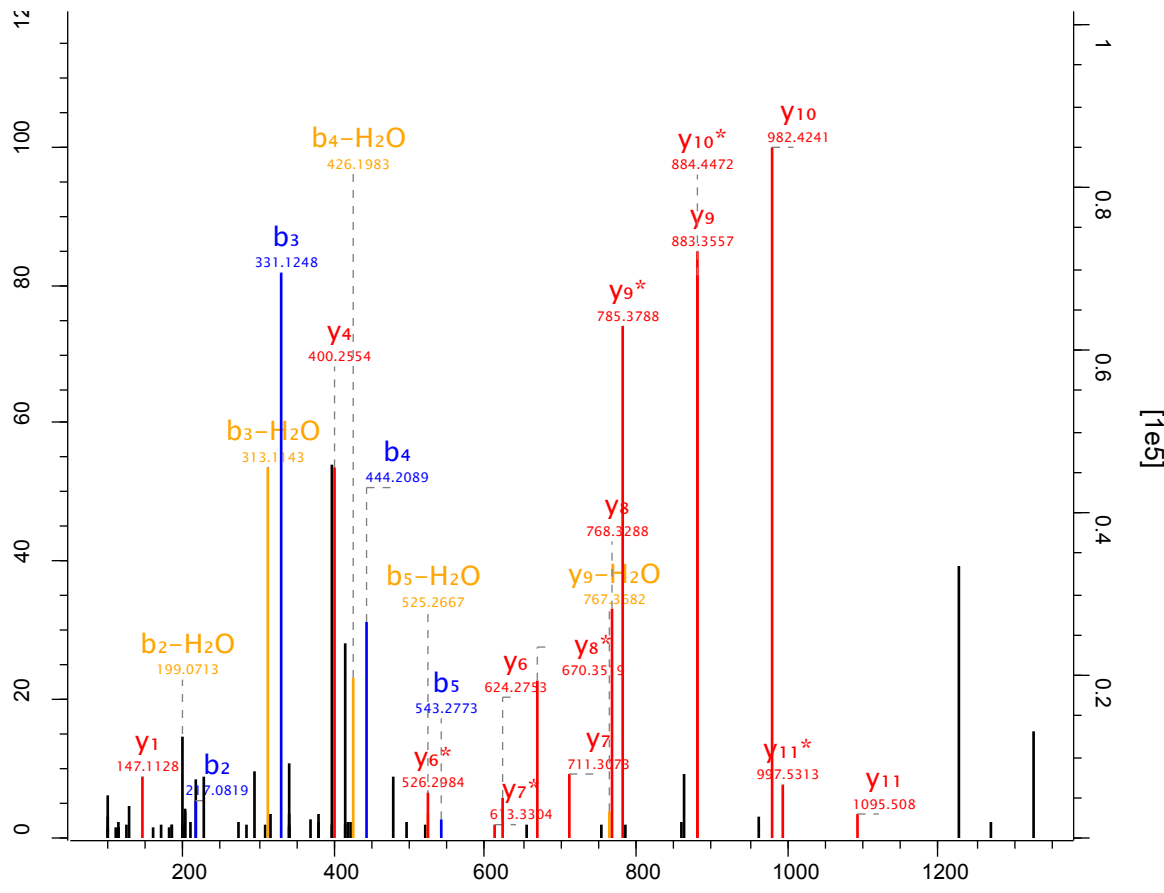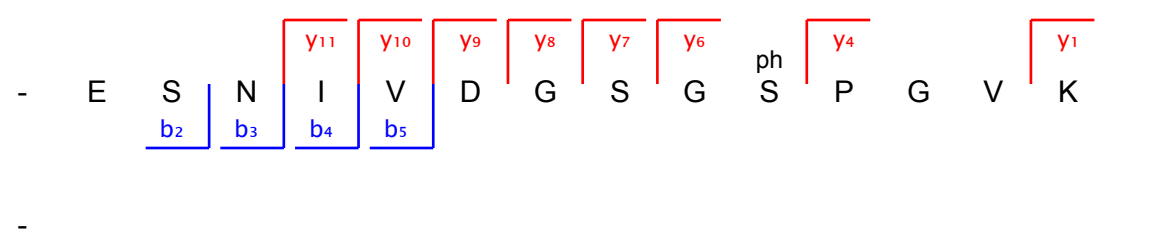

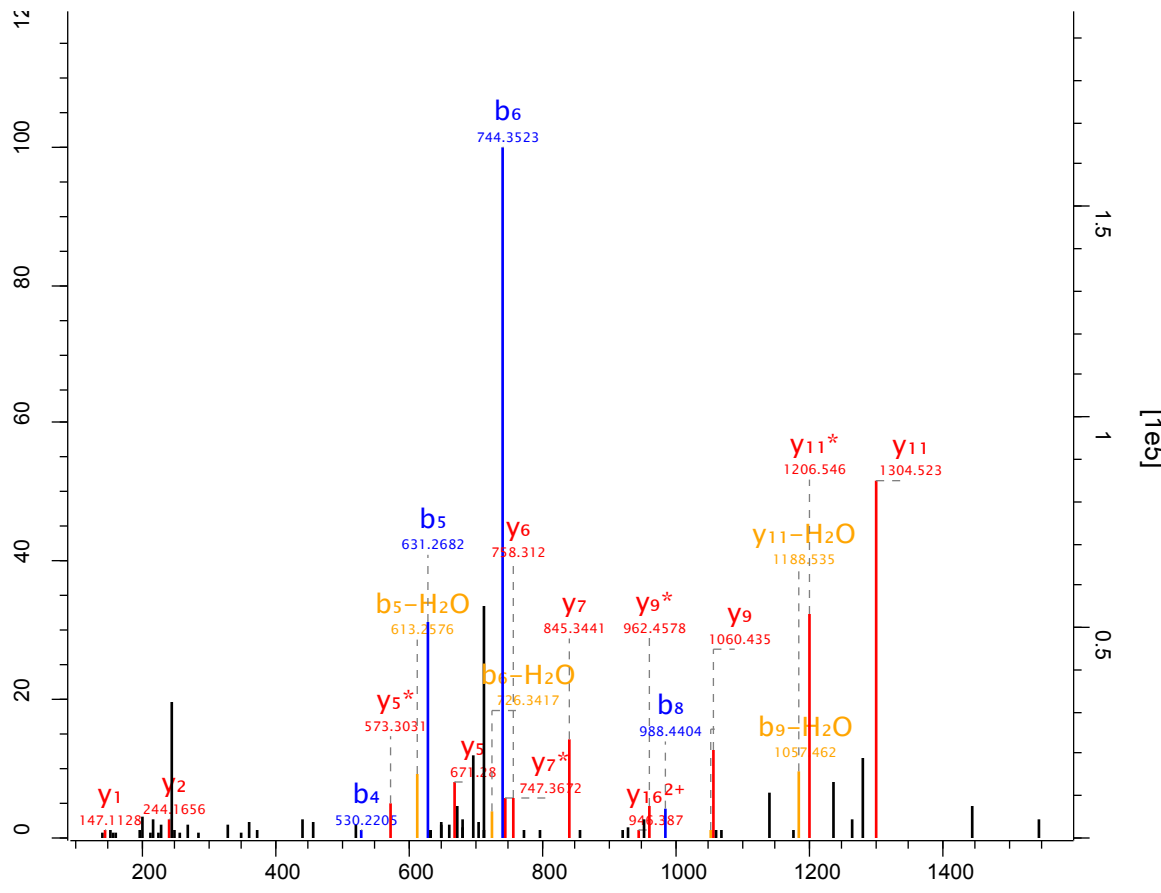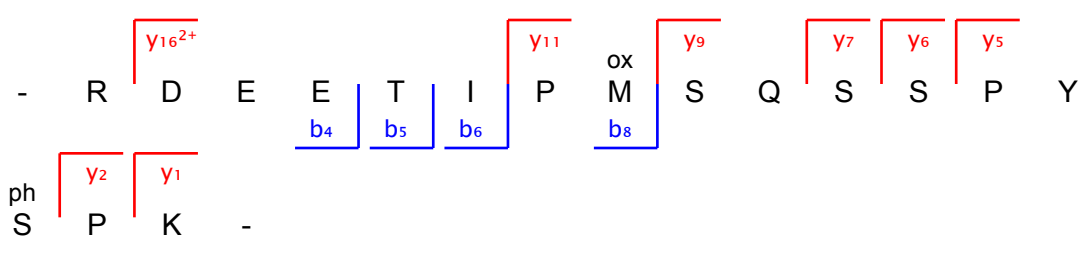

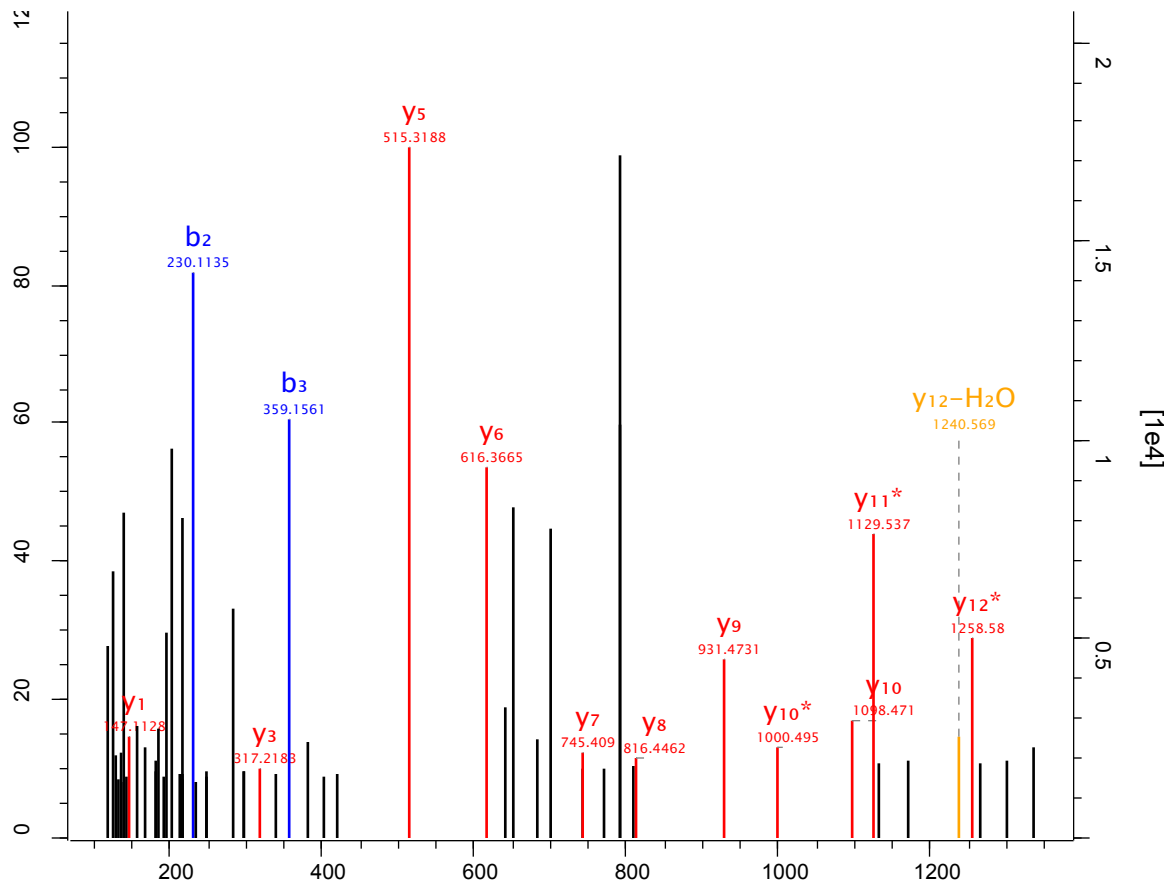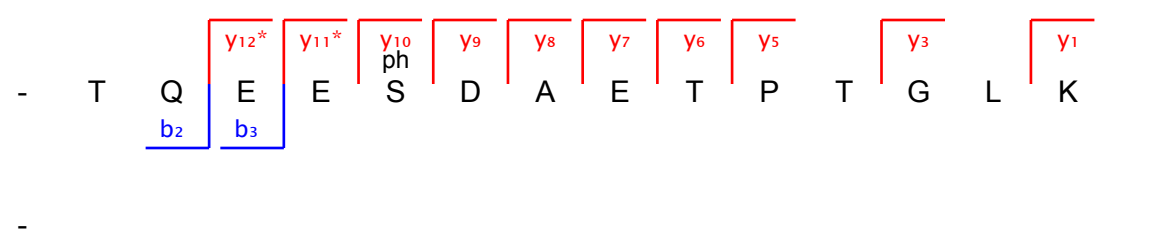

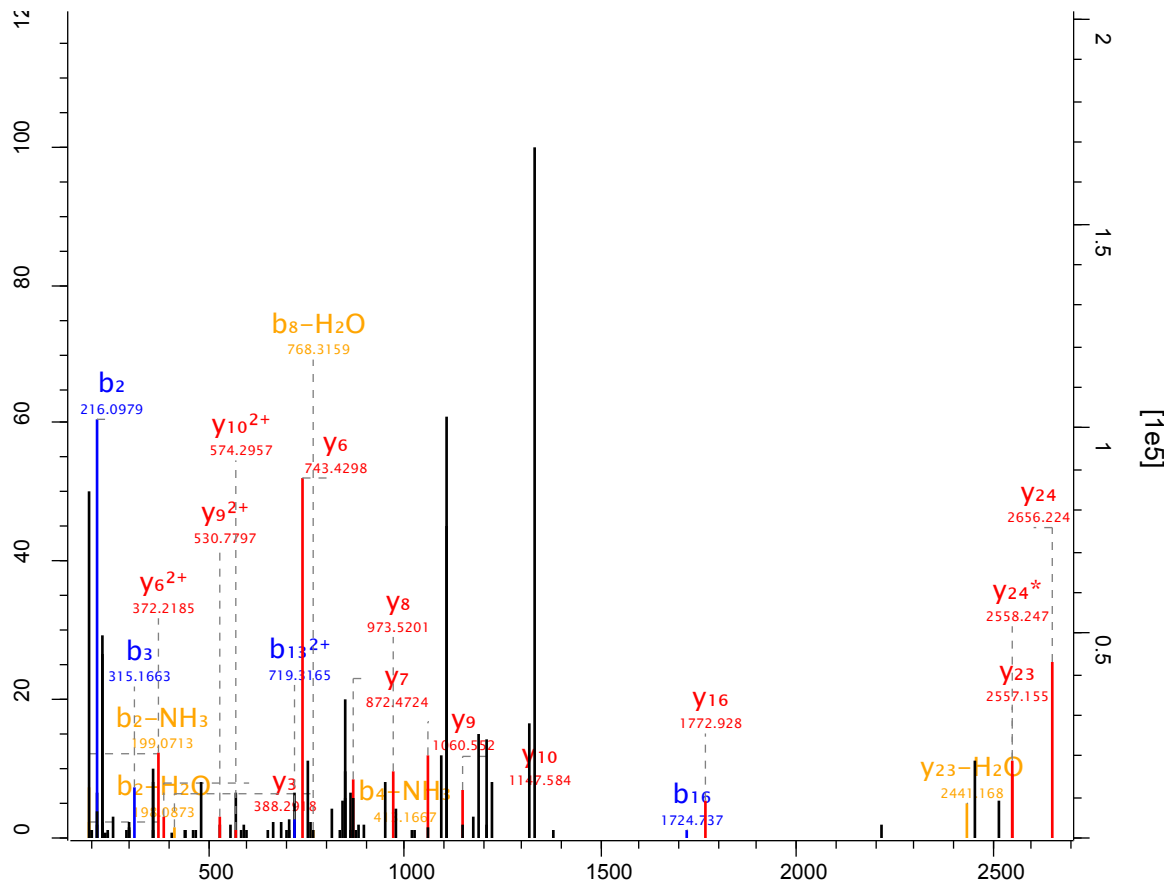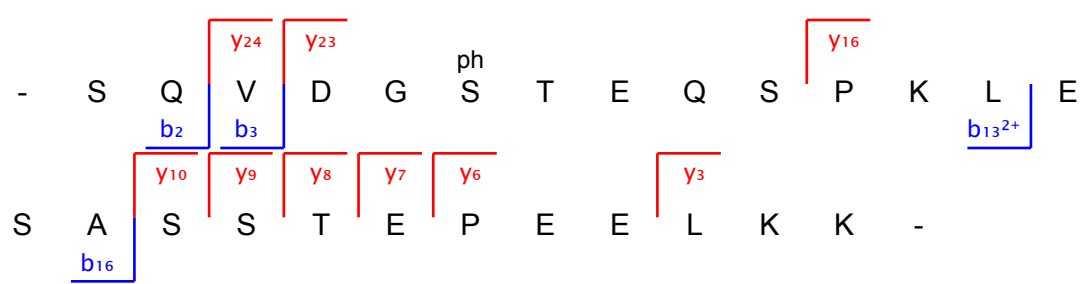

2013\_COL15\_34\_38\_151128201608

9963

FTMS; HCD

83.09

610.28

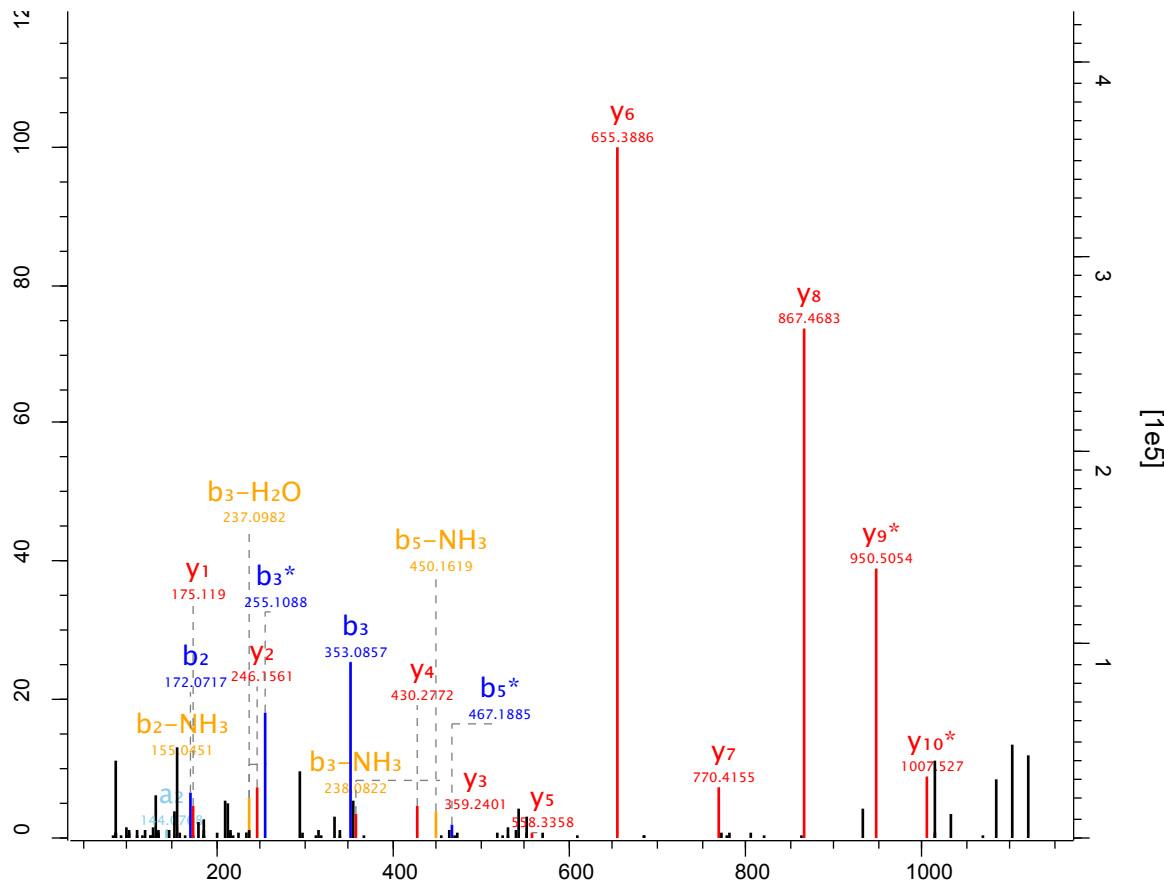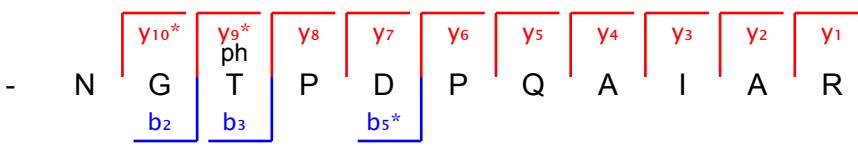

| Raw file         | Scan  | Method    | Score | m/z    |
|------------------|-------|-----------|-------|--------|
| 2013_COL15_34_38 | 17138 | FTMS; HCD | 45    | 707.33 |

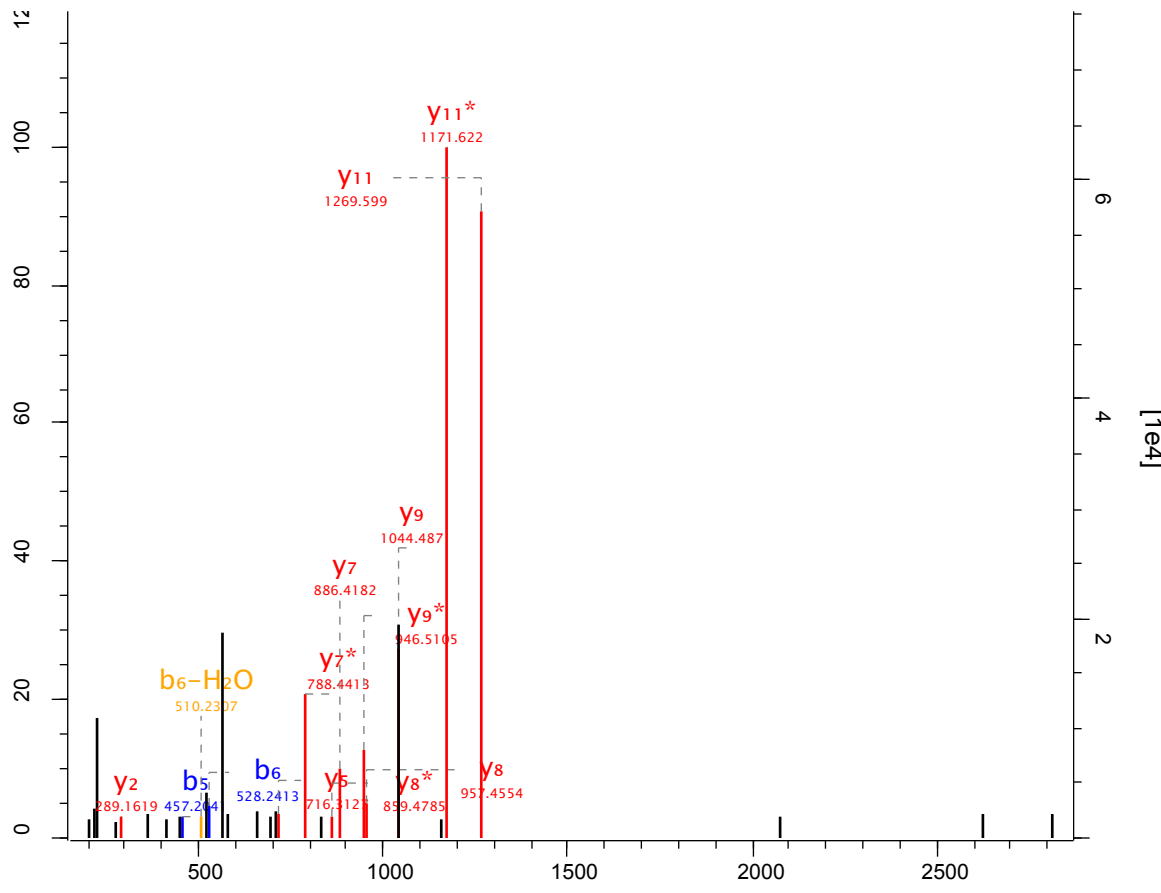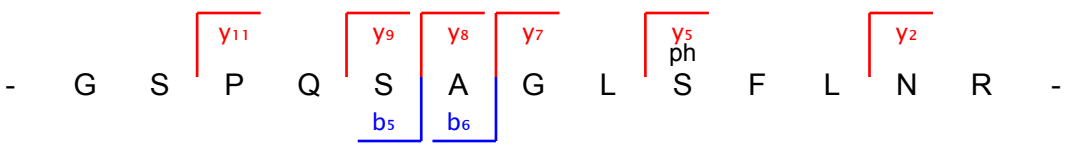



| Raw file         | Scan | Method    | Score | m/z    |
|------------------|------|-----------|-------|--------|
| 2013_COL15_34_38 | 5451 | FTMS; HCD | 40.49 | 515.56 |

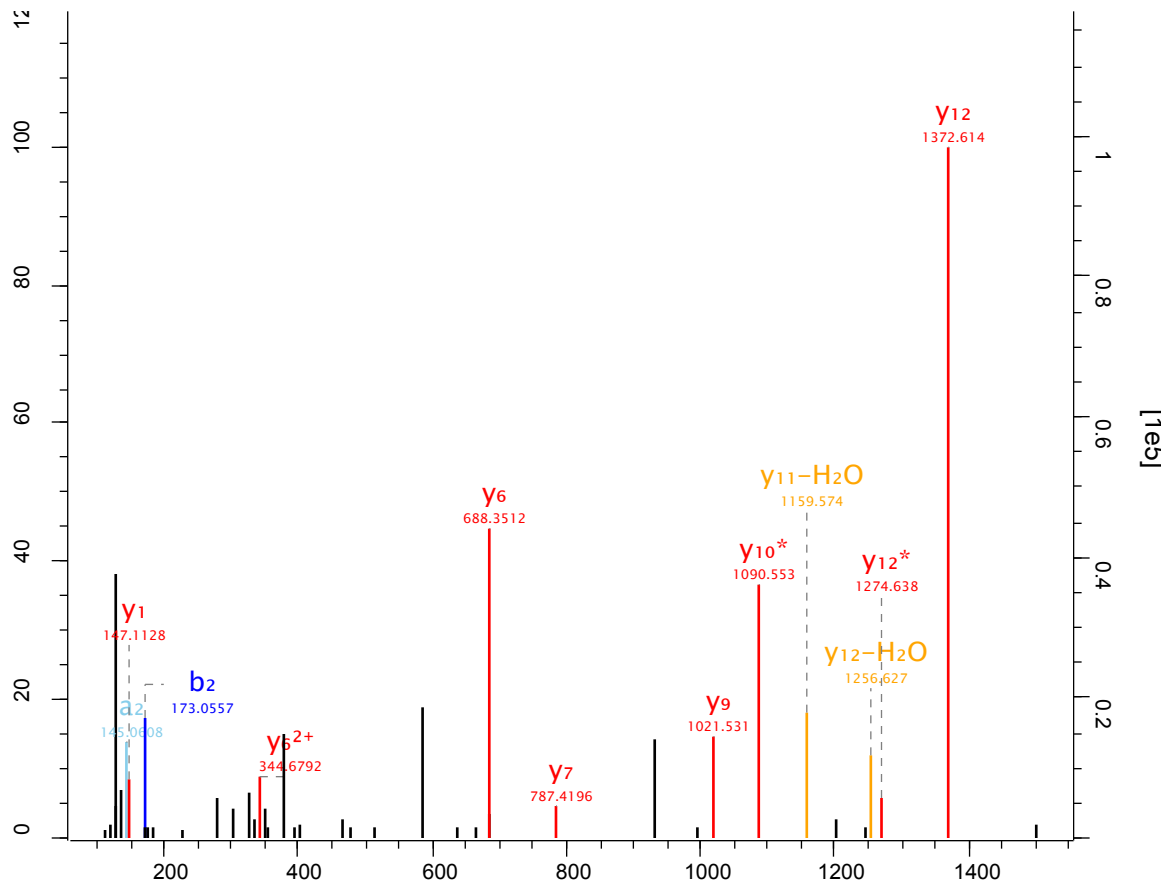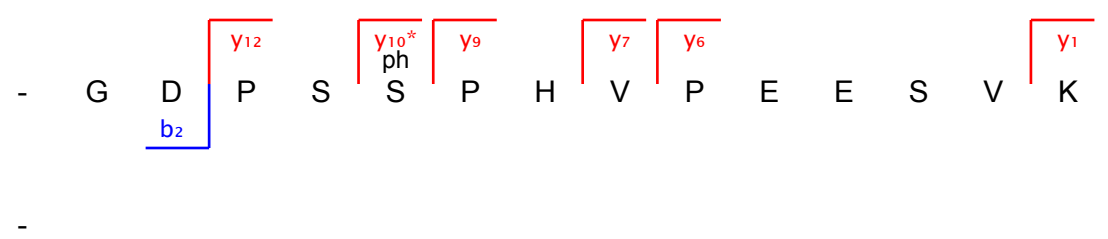

Raw file Scan Method Score m/z  
 2013\_COL15\_38\_45 10082 FTMS; HCD 63.62 569.26

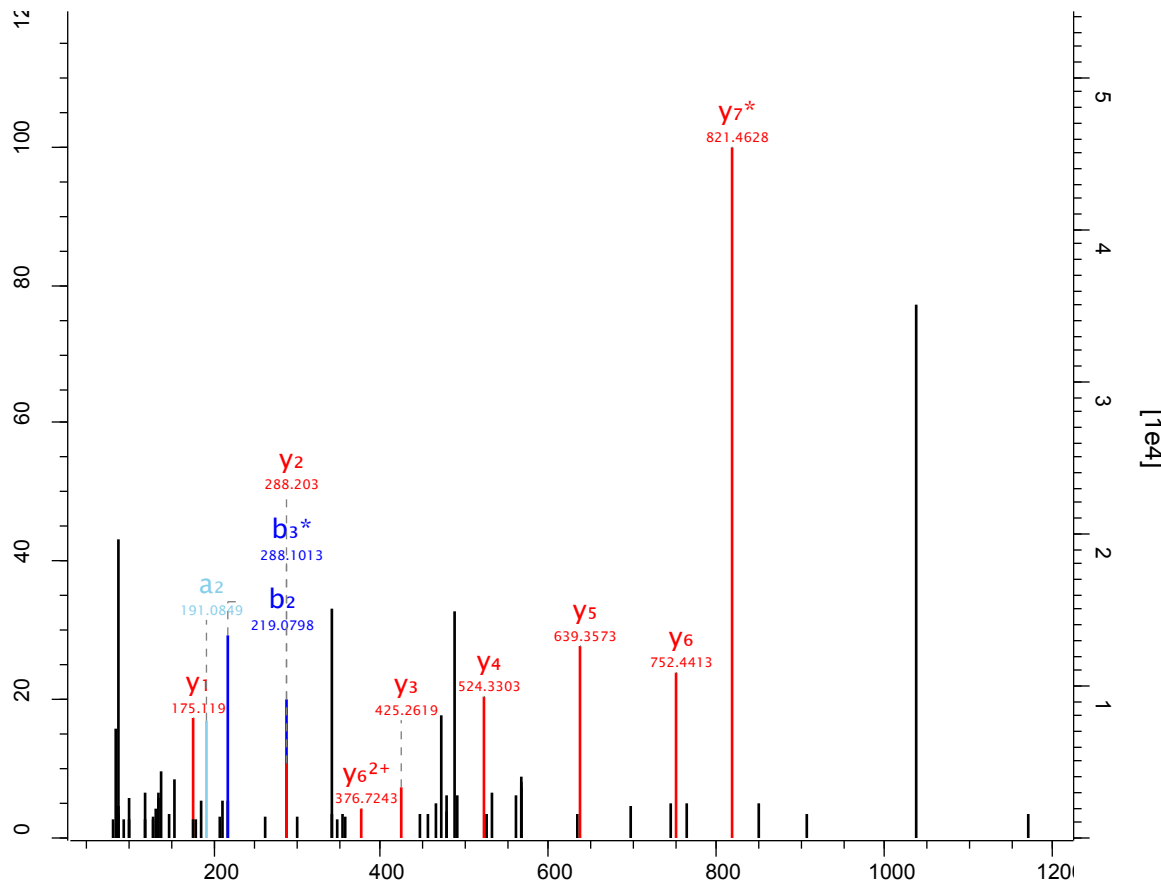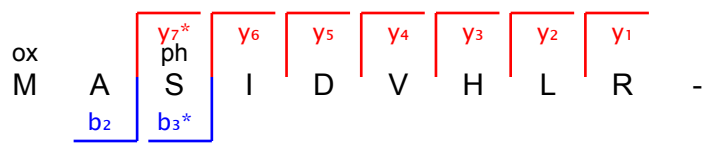

Raw file Scan Method Score m/z  
 2013\_COL15\_38\_45 10694 FTMS; HCD 87.18 550.74

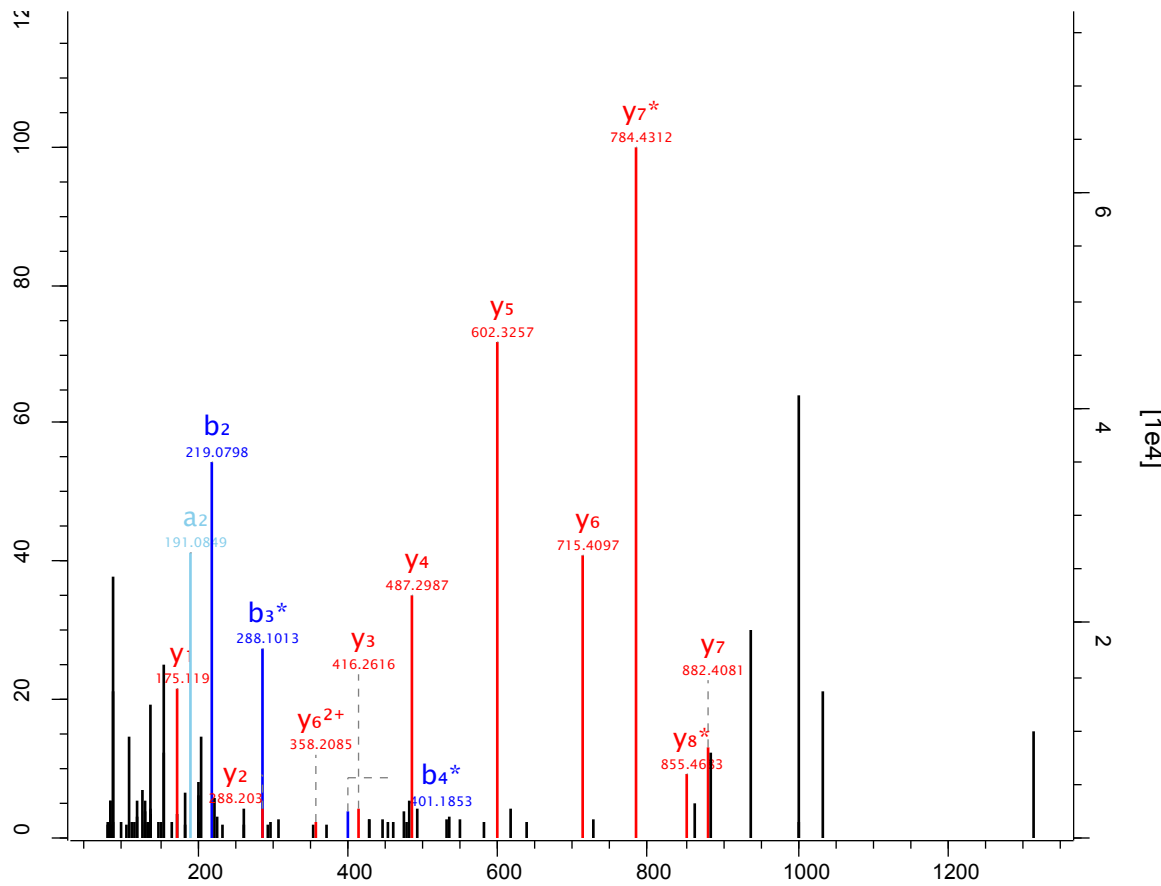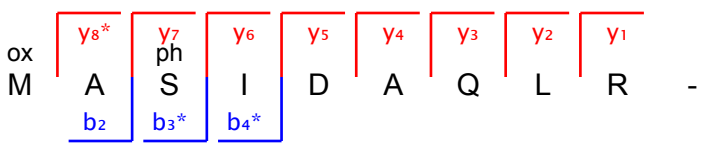

Raw file Scan Method Score m/z  
 2013\_COL15\_38\_45 1099 FTMS; HCD 89.27 340.83

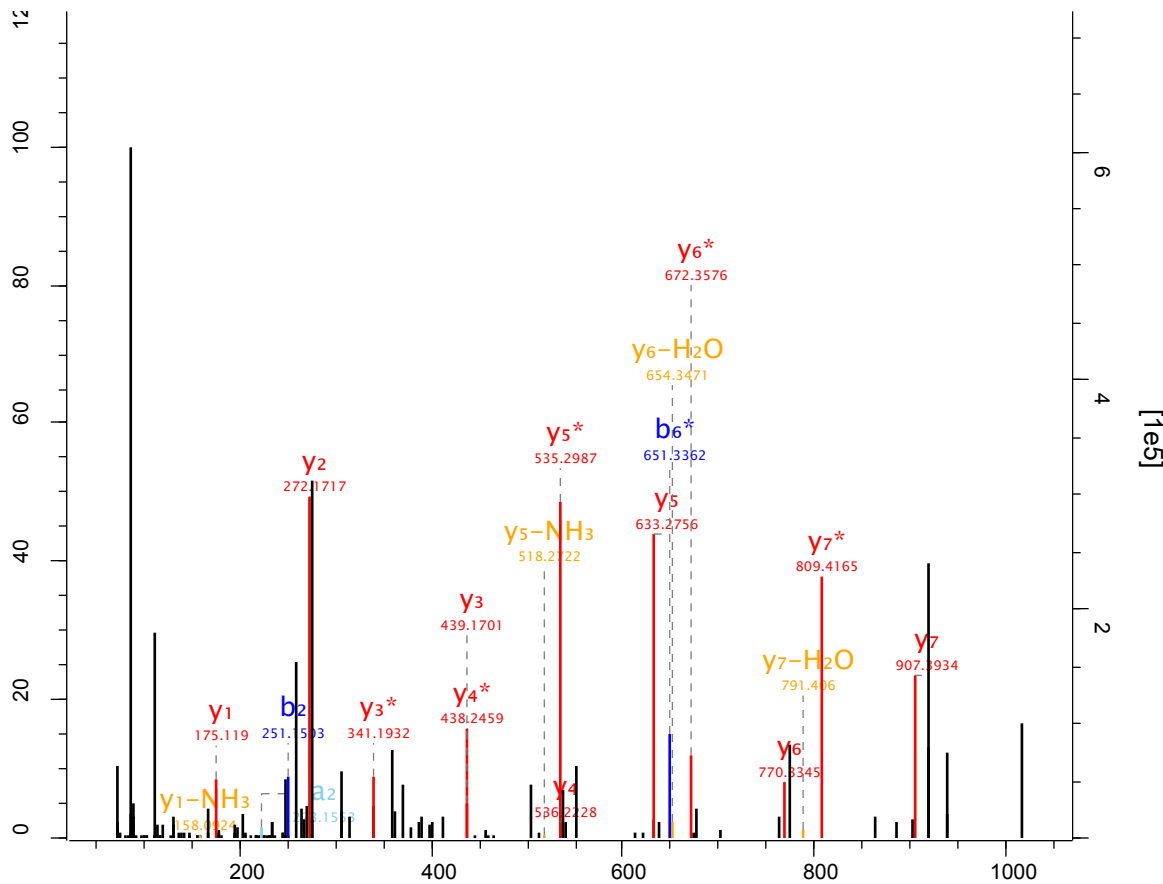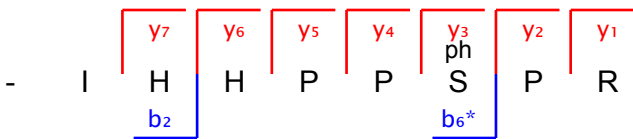

Raw file Scan Method Score m/z  
 2013\_COL15\_38\_45 11238 FTMS; HCD 75.91 784.82

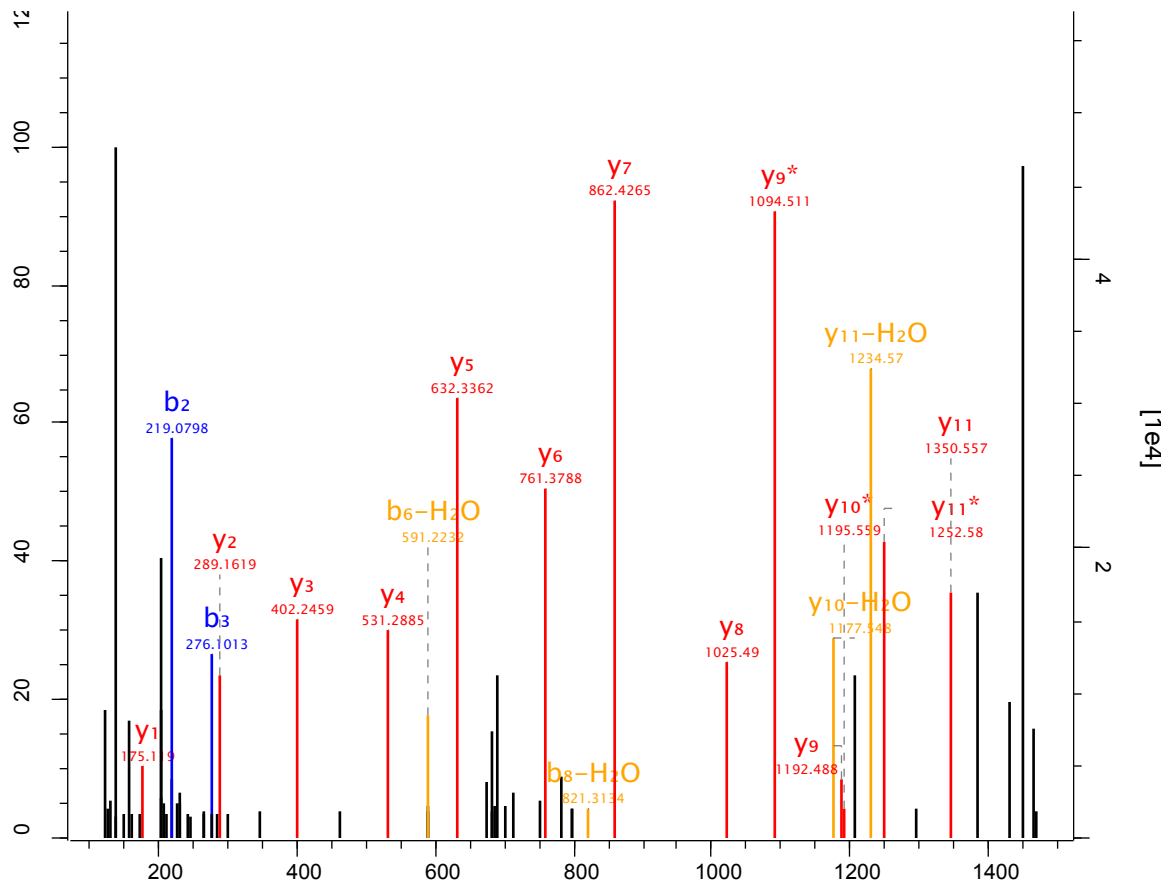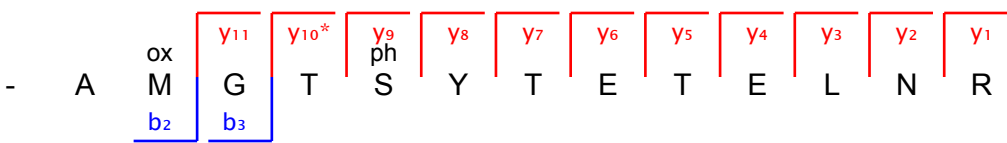



Raw file Scan Method Score m/z  
 2013\_COL15\_38\_45 11358 FTMS; HCD 84.75 605.72

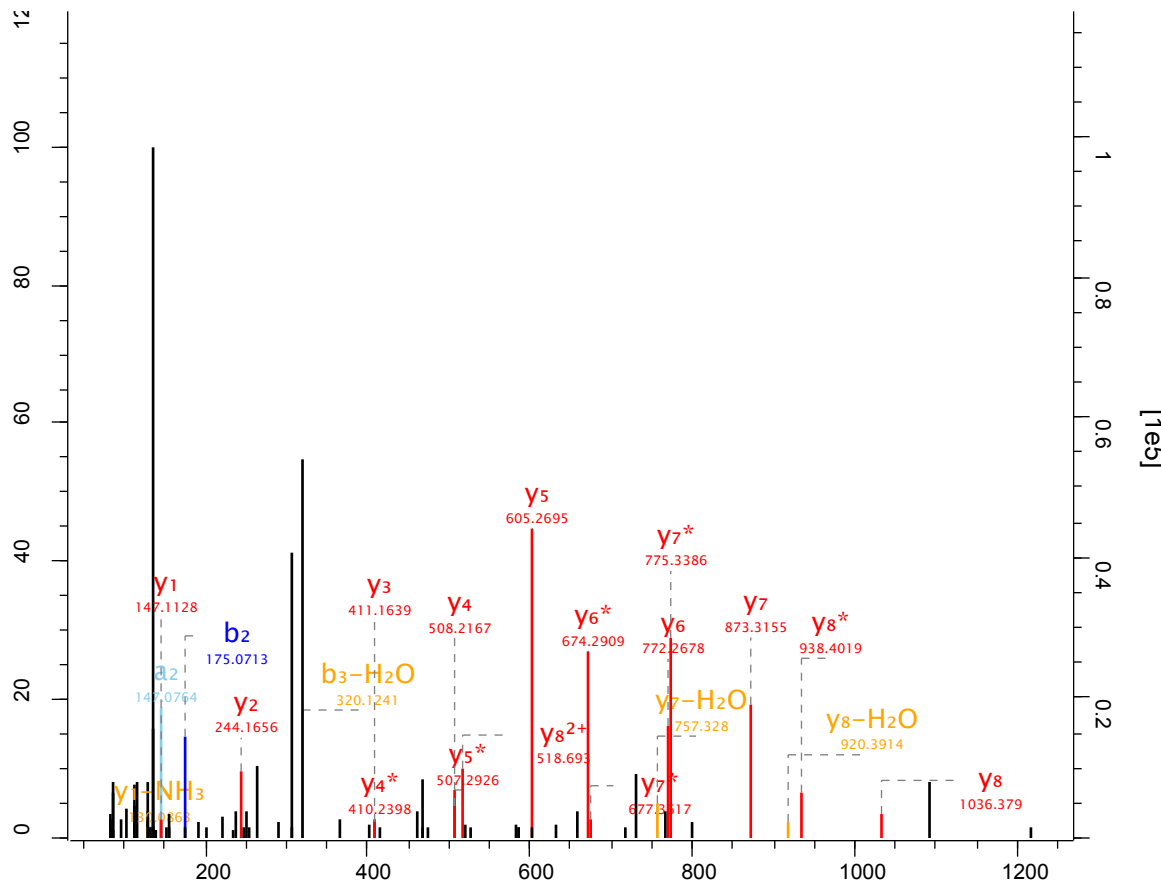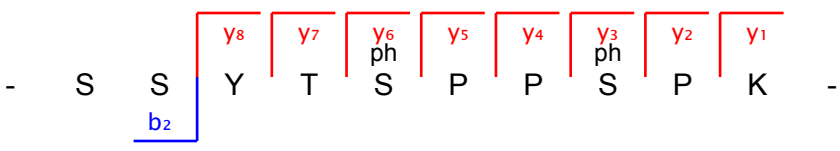

Raw file Scan Method Score m/z  
 2013\_COL15\_38\_45 11426 FTMS; HCD 58.71 686.61

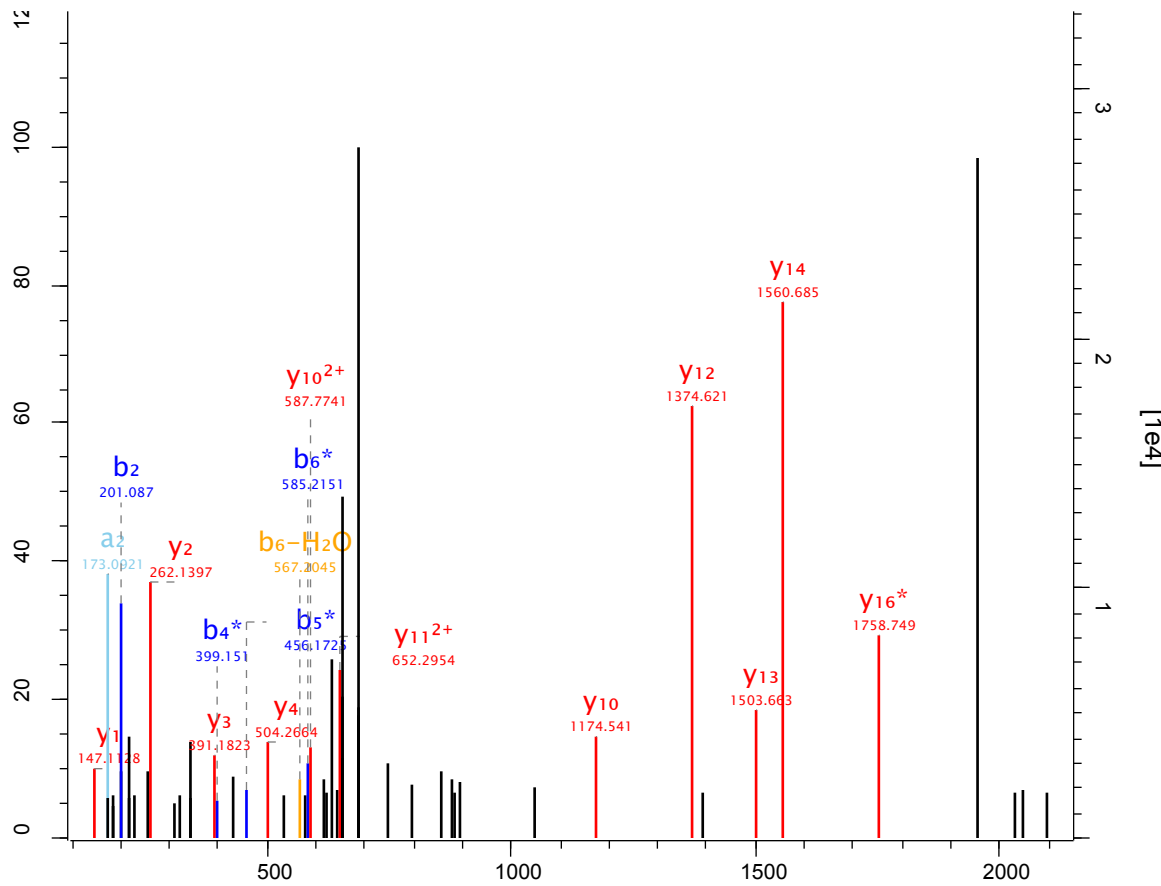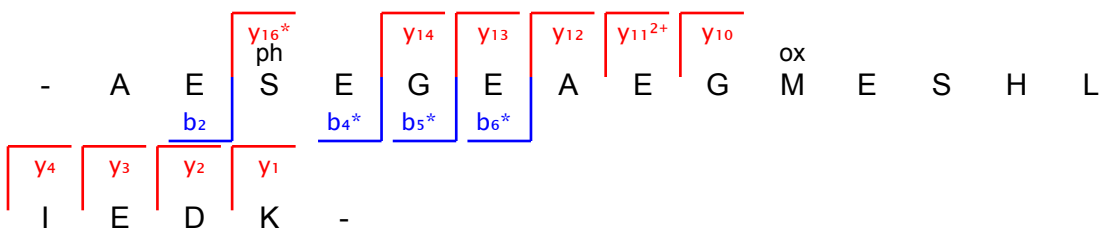



Raw file Scan Method Score m/z  
 2013\_COL15\_38\_45 11610 FTMS; HCD 102.57 527.87

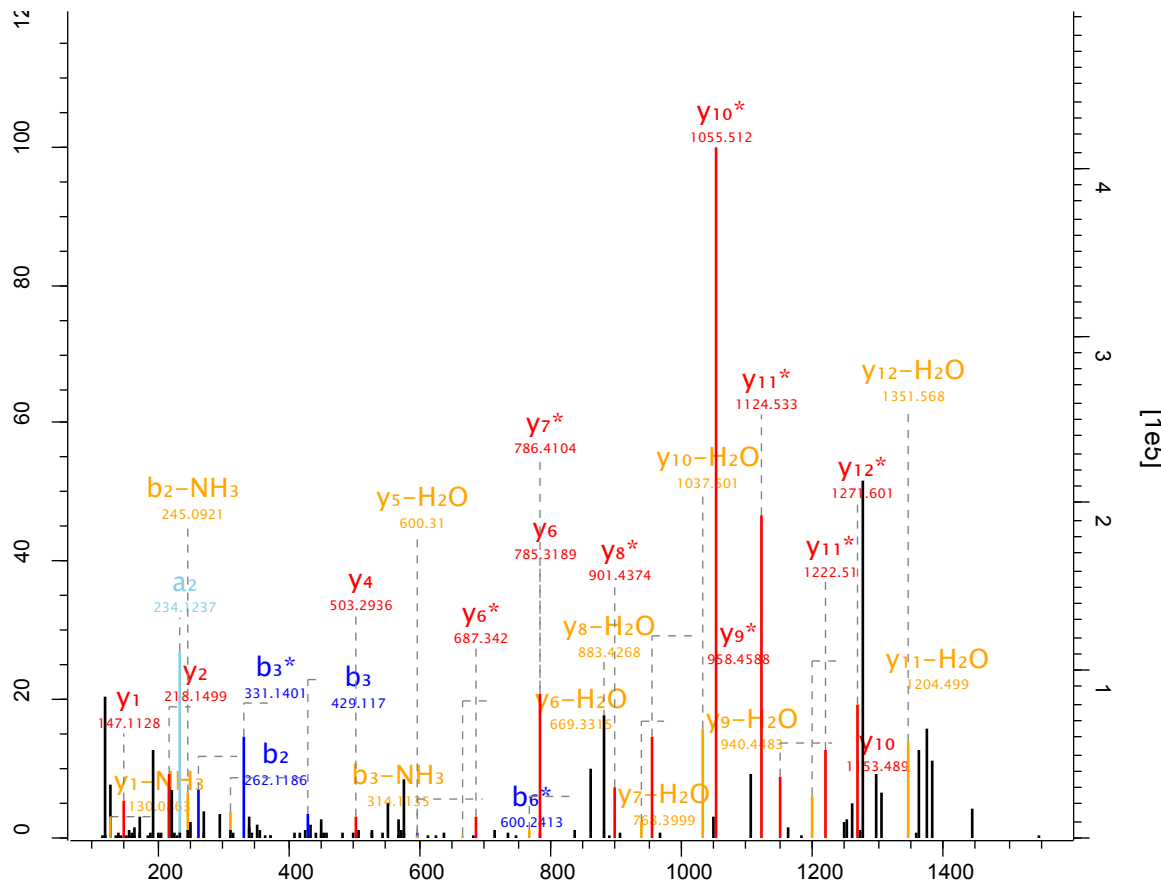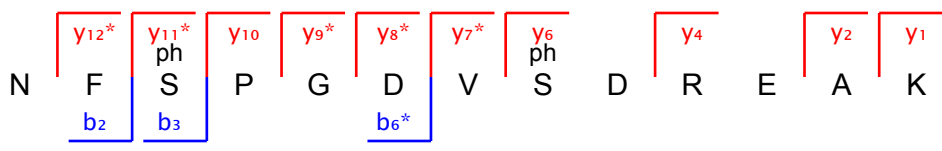

Raw file Scan Method Score m/z  
 2013\_COL15\_38\_45 11619 FTMS; HCD 93.42 611.71

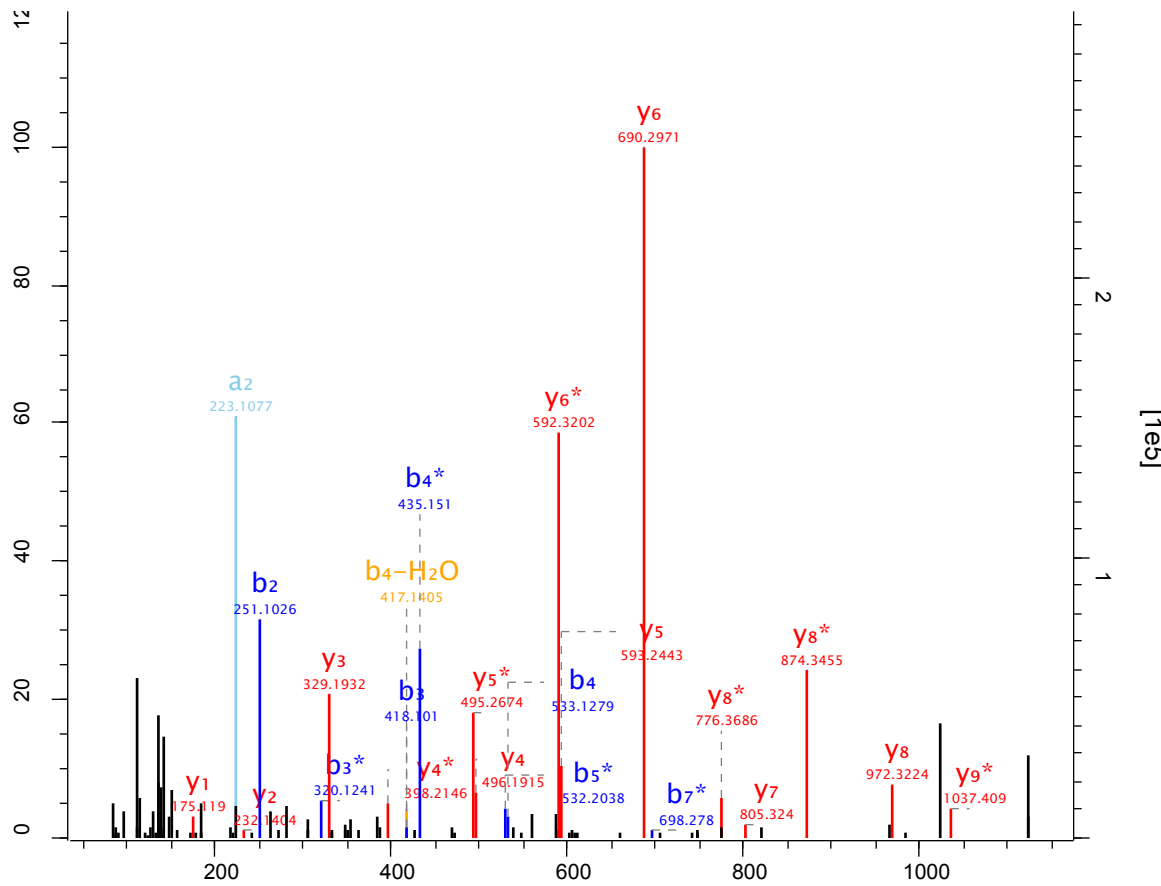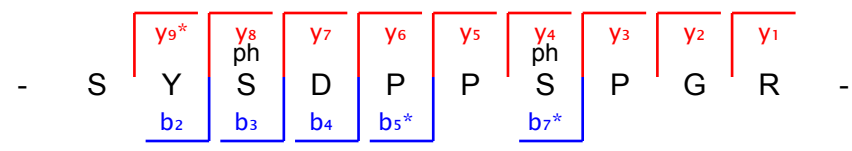

Raw file: 2013\_COL15\_38\_45  
 Scan: 1167  
 Method: FTMS; HCD  
 Score: 92.44  
 m/z: 543.25

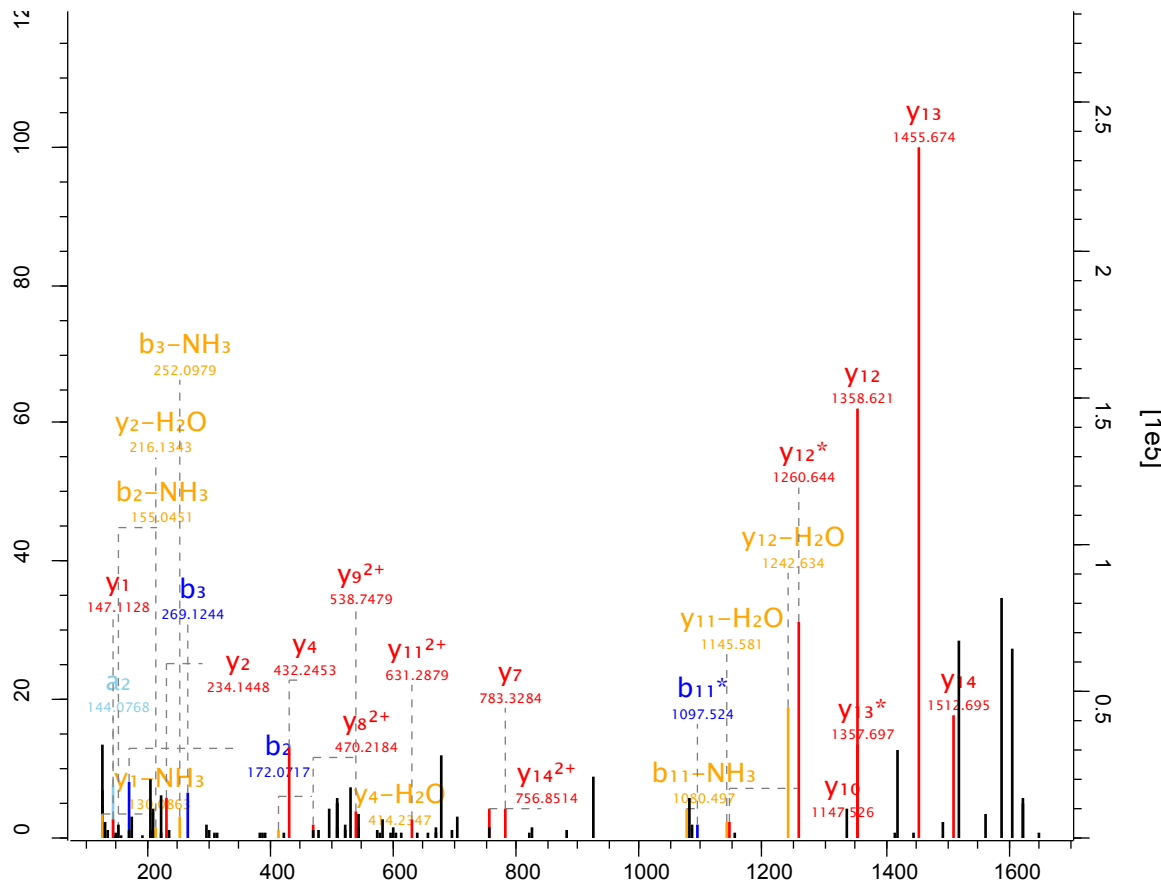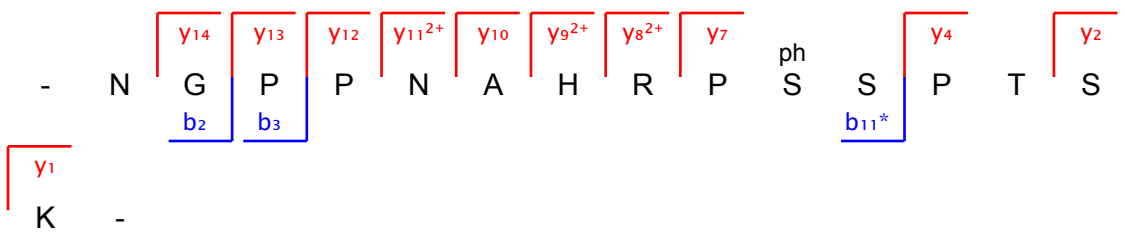

Raw file Scan Method Score m/z  
 2013\_COL15\_38\_45 11771 FTMS; HCD 147.06 827.83

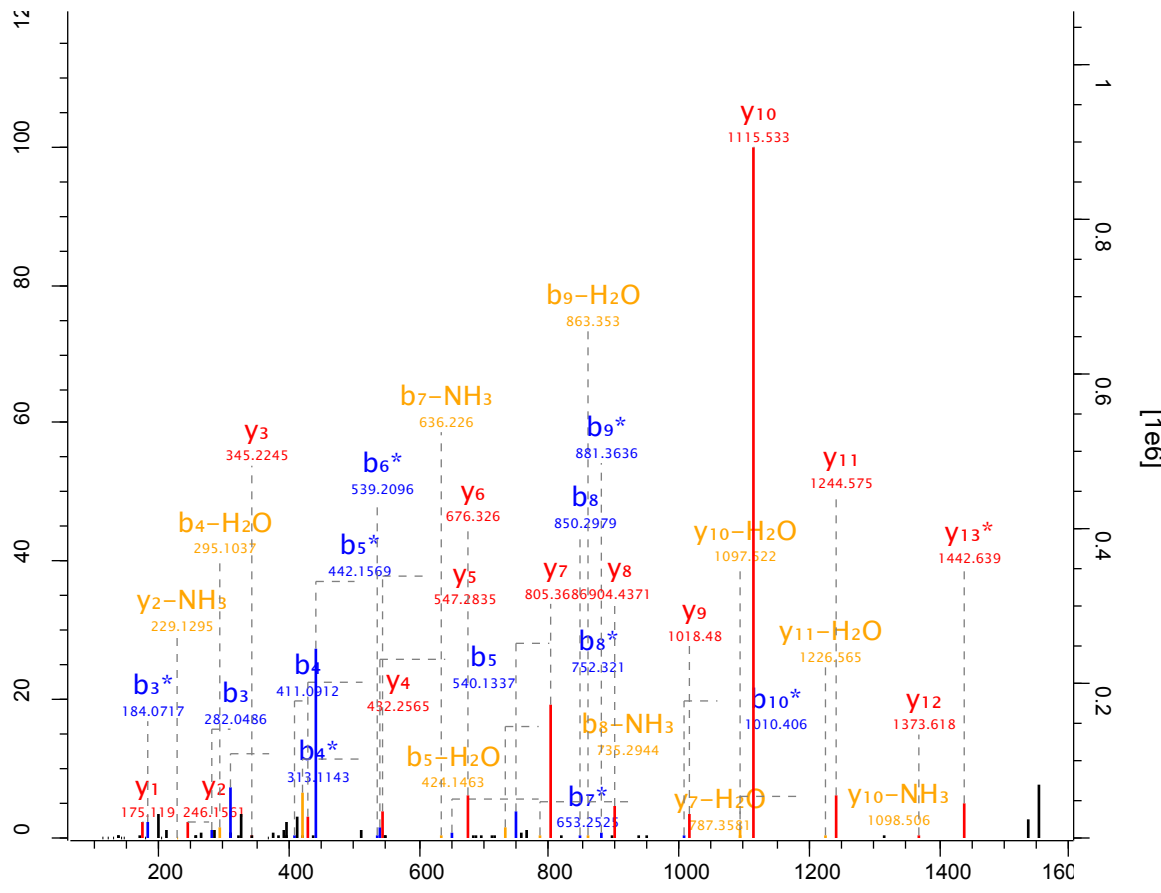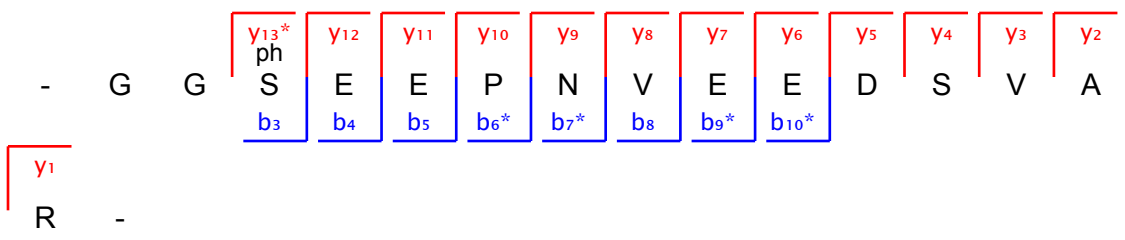

Raw file Scan Method Score m/z  
 2013\_COL15\_38\_45 1186 FTMS; HCD 54.1 654.92

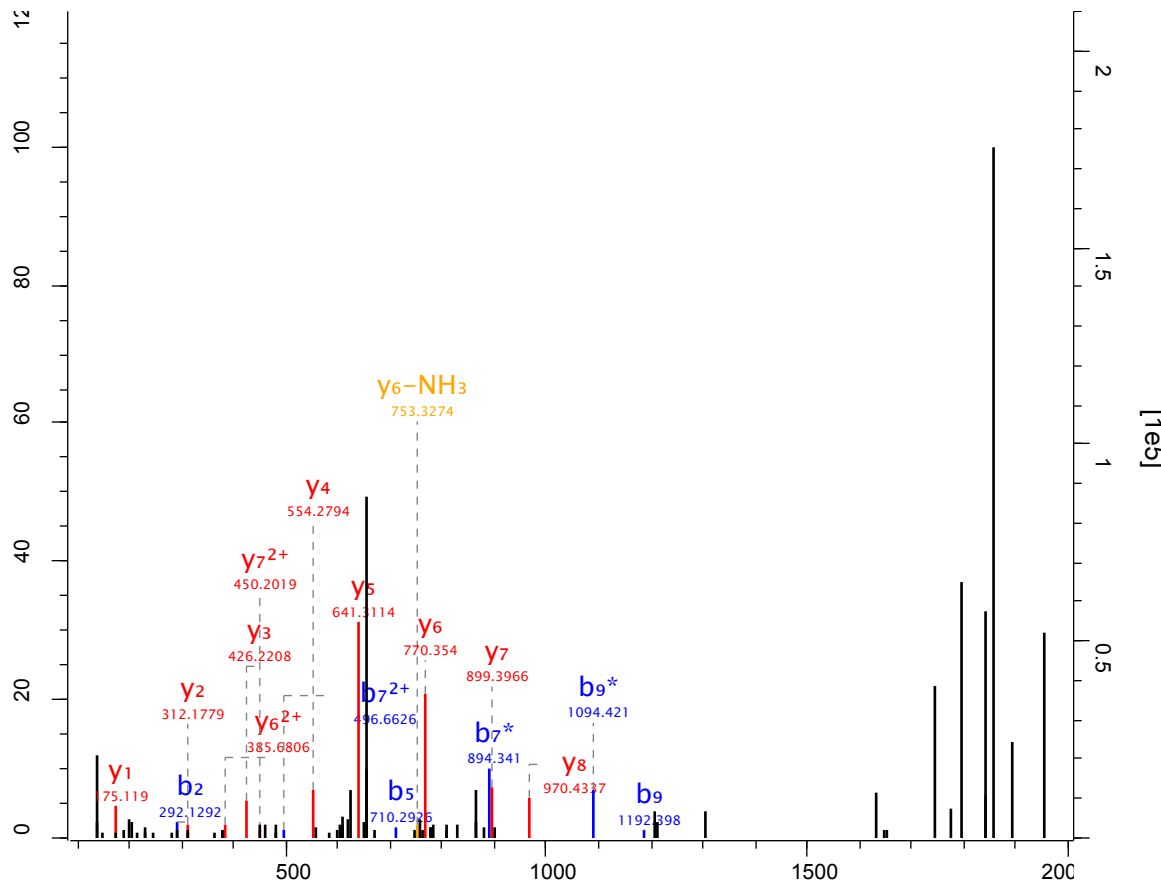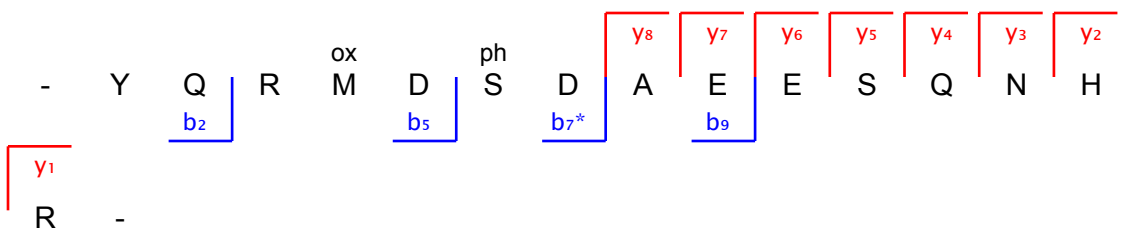

| Raw file         | Scan  | Method    | Score | m/z    |
|------------------|-------|-----------|-------|--------|
| 2013_COL15_38_45 | 11914 | FTMS; HCD | 54.1  | 595.59 |

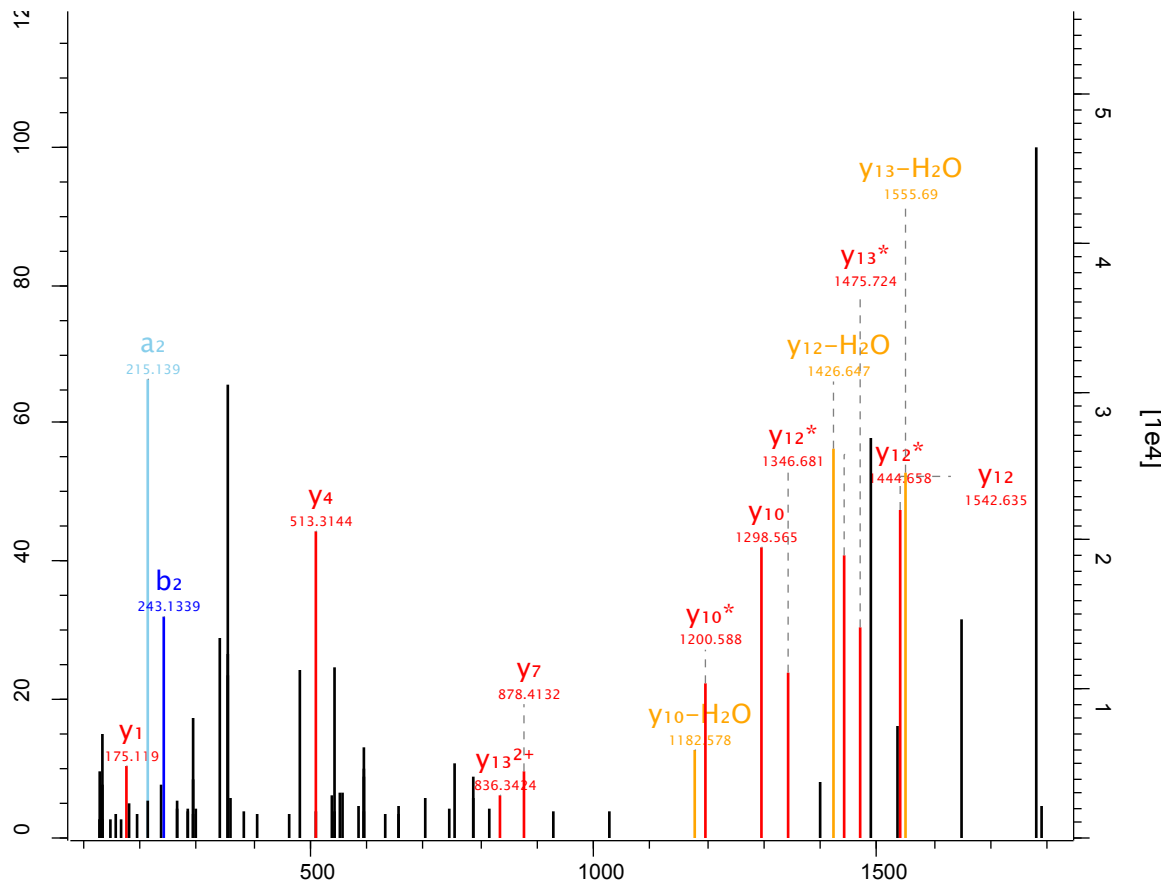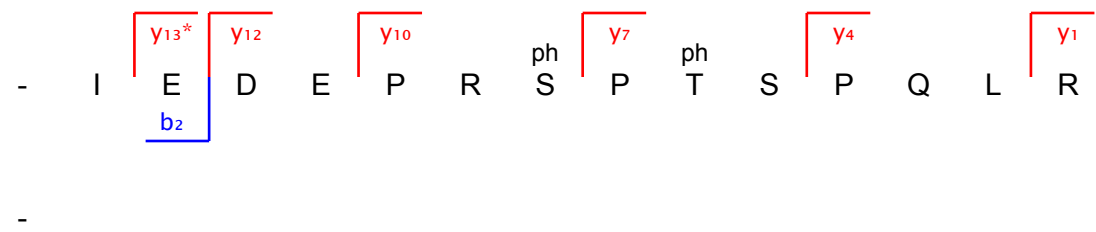

Raw file Scan Method Score m/z  
 2013\_COL15\_38\_45 11990 FTMS; HCD 45 500.2

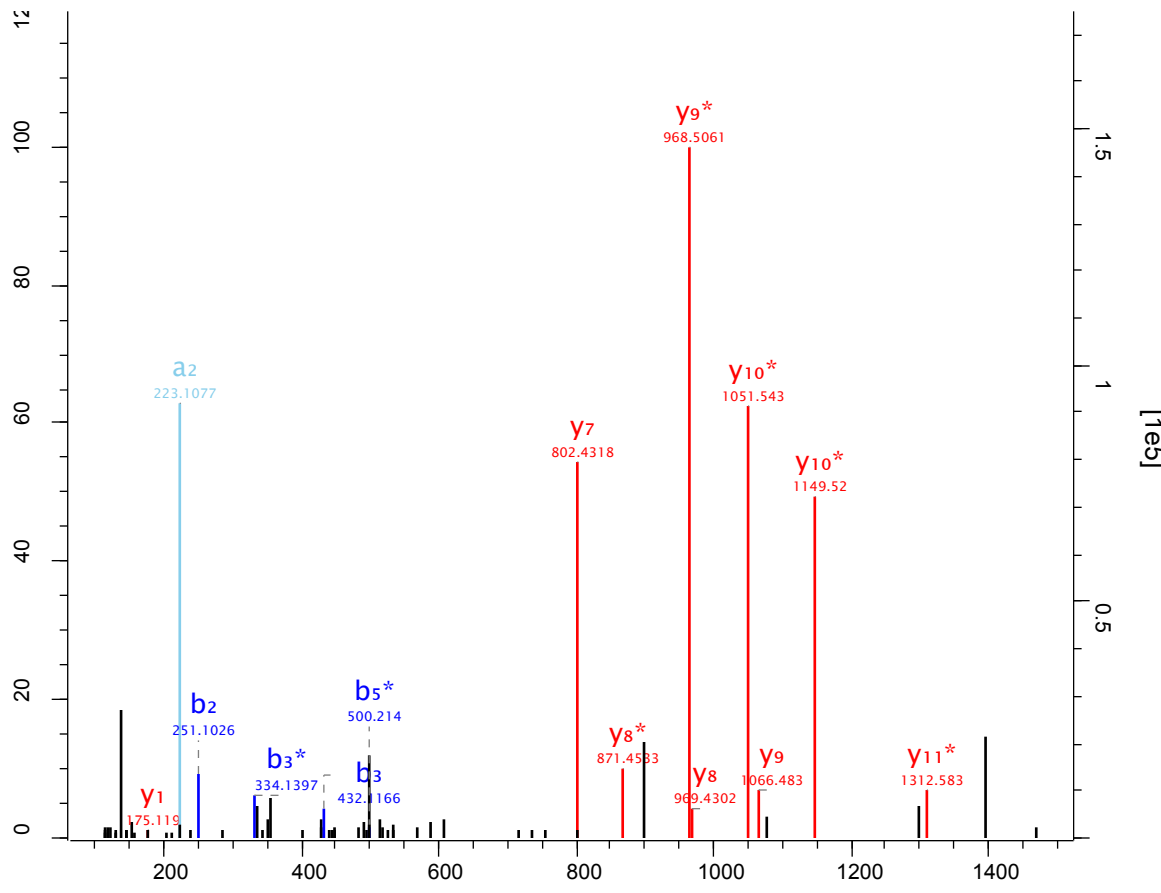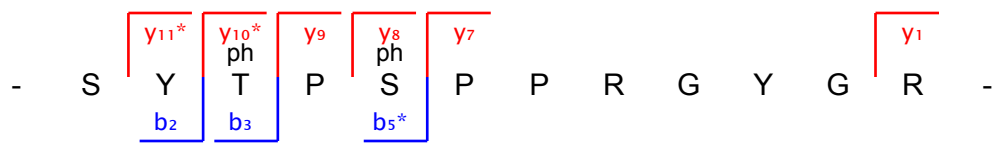

Raw file Scan Method Score m/z  
 2013\_COL15\_38\_45 12053 FTMS; HCD 133.21 576.25

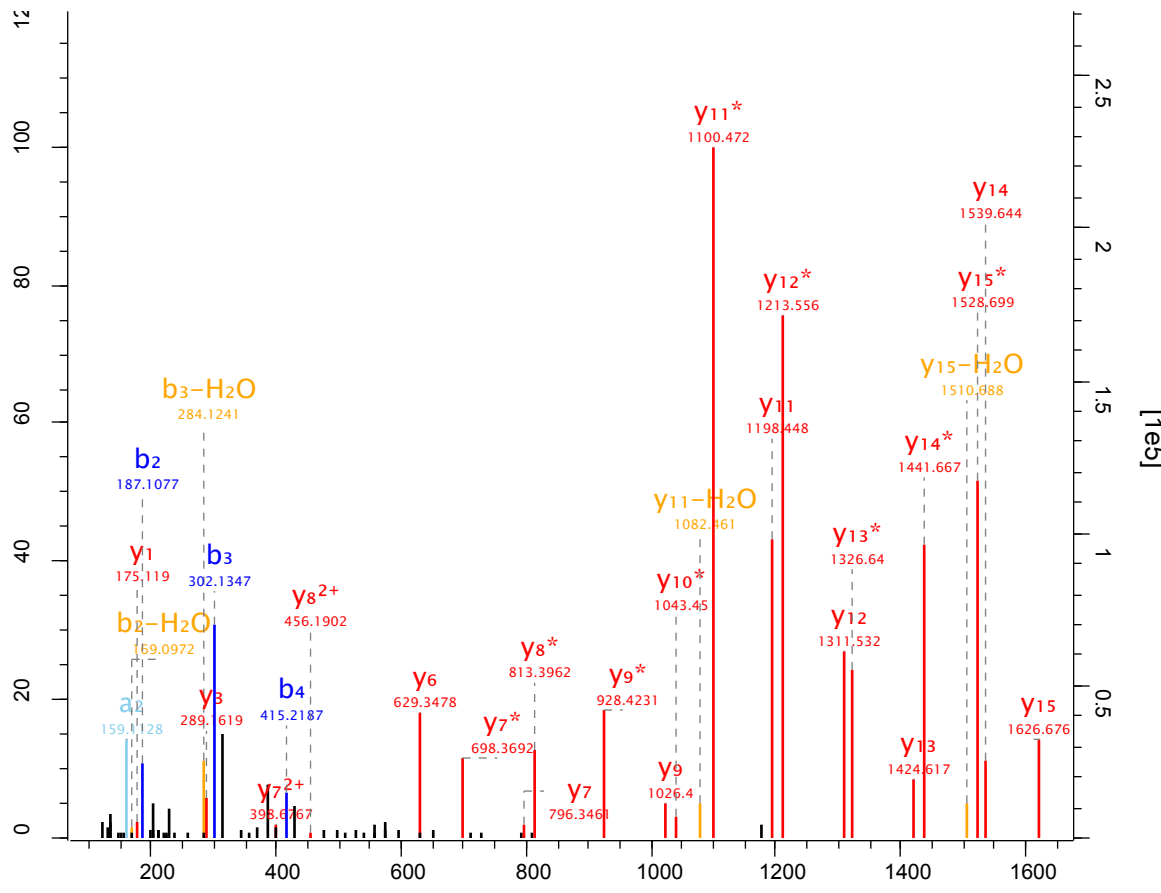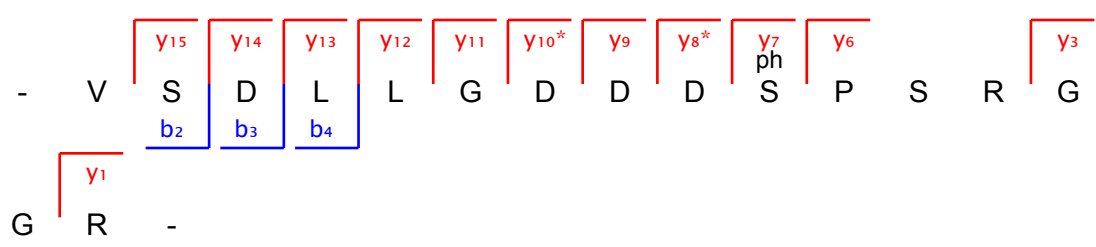



Raw file Scan Method Score m/z  
 2013\_COL15\_38\_45 12675 FTMS; HCD 69.92 639.81

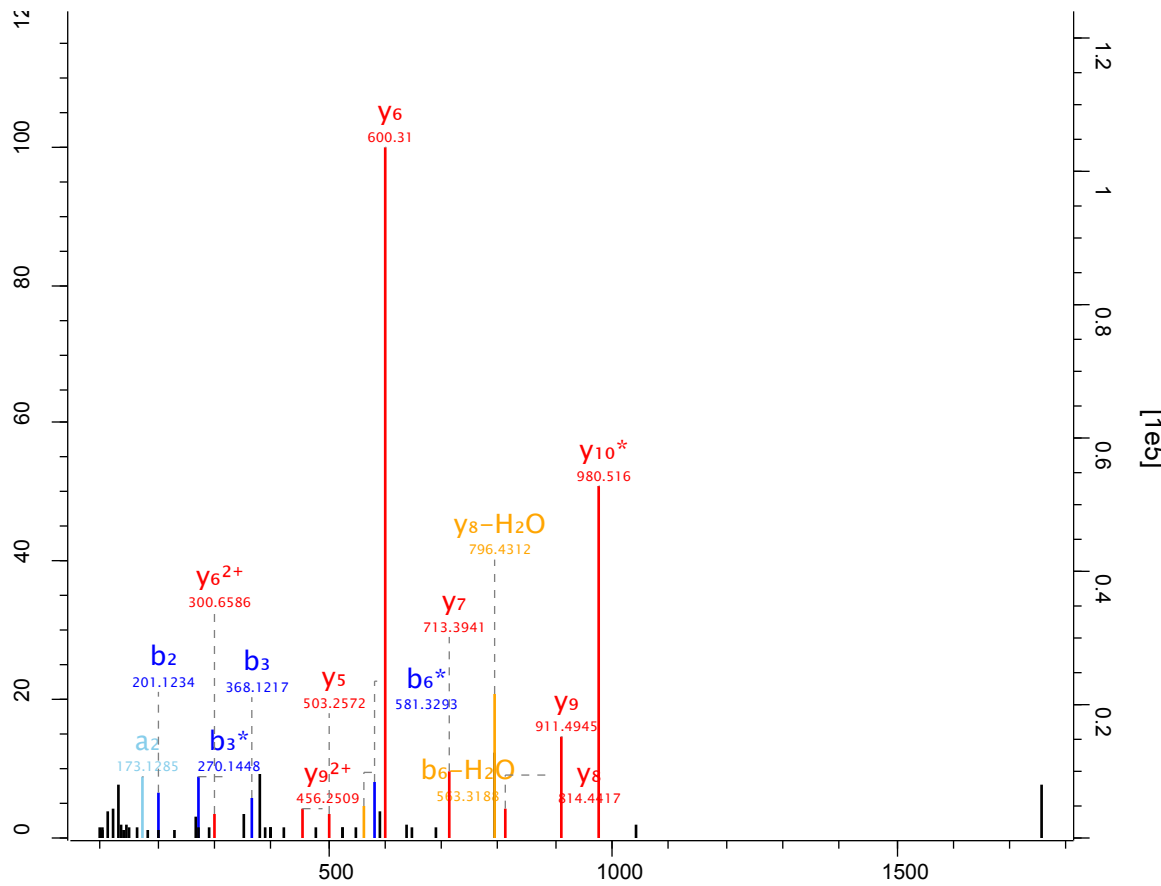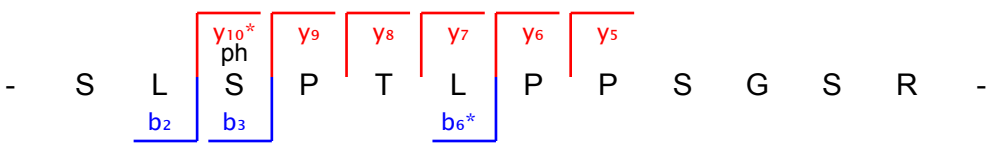

| Raw file         | Scan  | Method    | Score | m/z    |
|------------------|-------|-----------|-------|--------|
| 2013_COL15_38_45 | 12769 | FTMS; HCD | 49.3  | 598.77 |

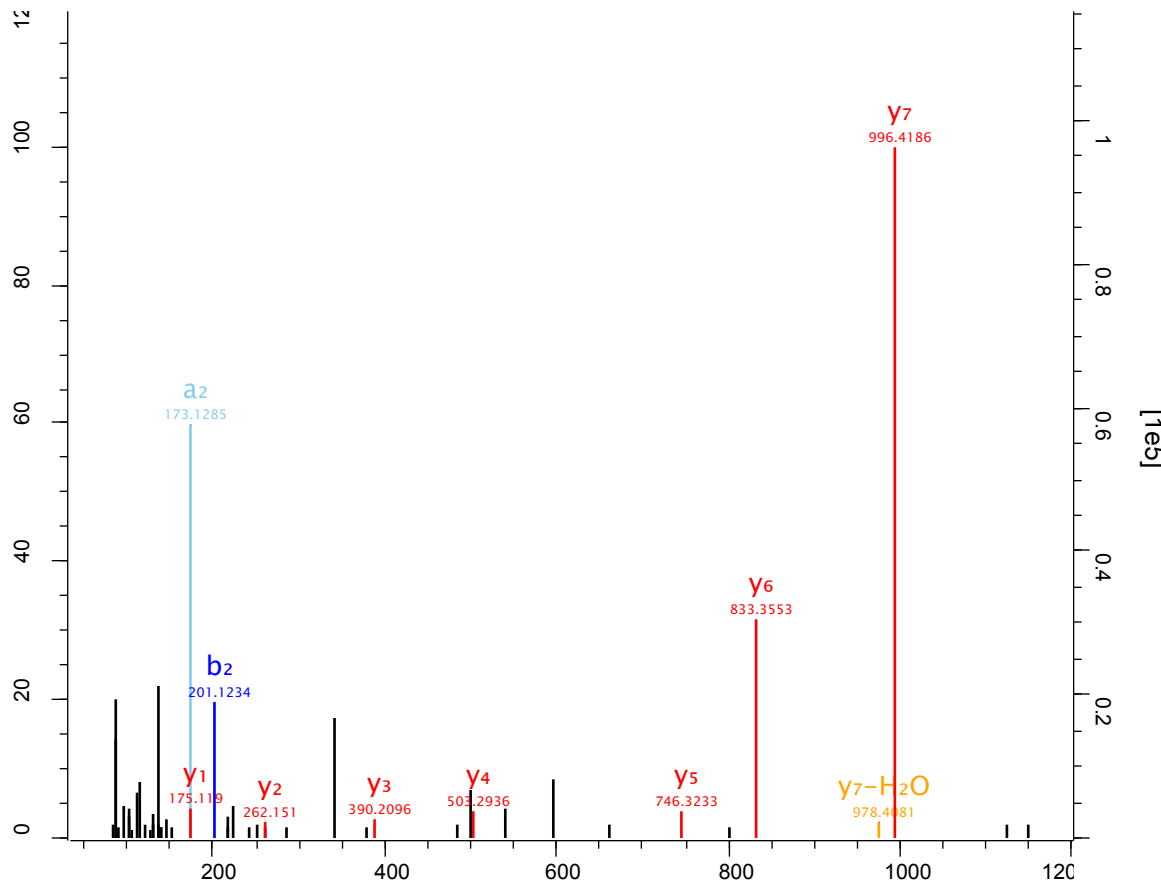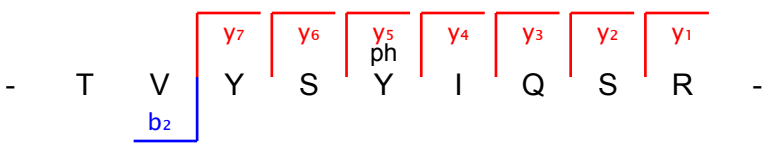

Raw file Scan Method Score m/z  
 2013\_COL15\_38\_45 12787 FTMS; HCD 120.23 756.29

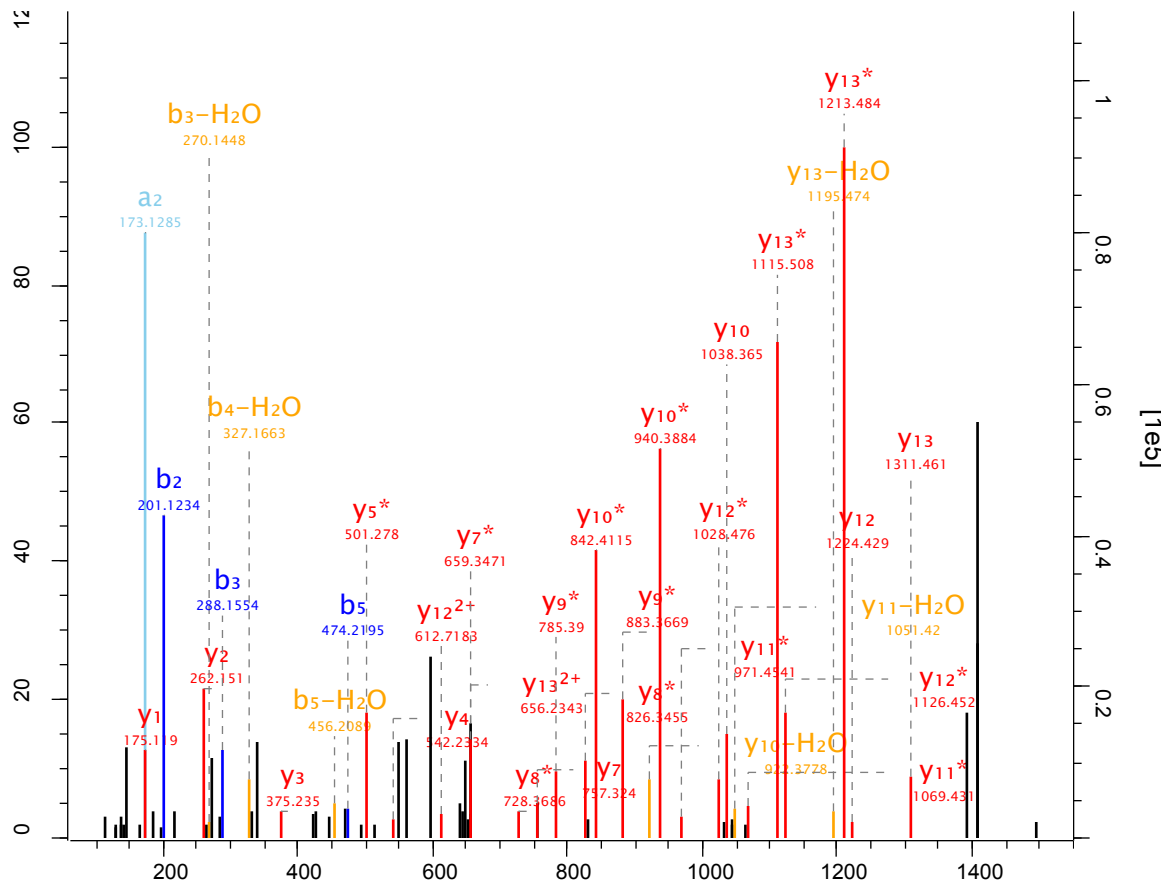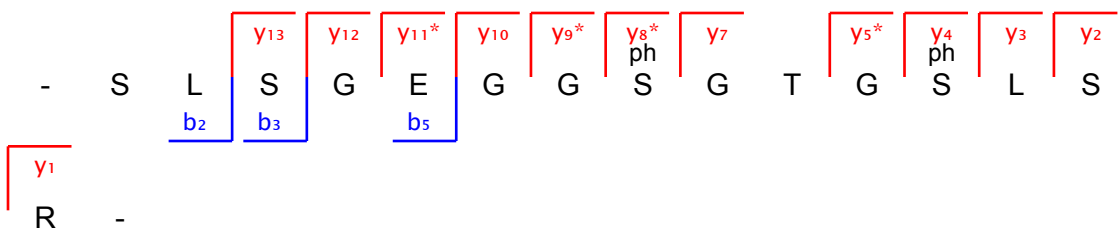

Raw file Scan Method Score m/z  
 2013\_COL15\_38\_45 12881 FTMS; HCD 56.51 712.31

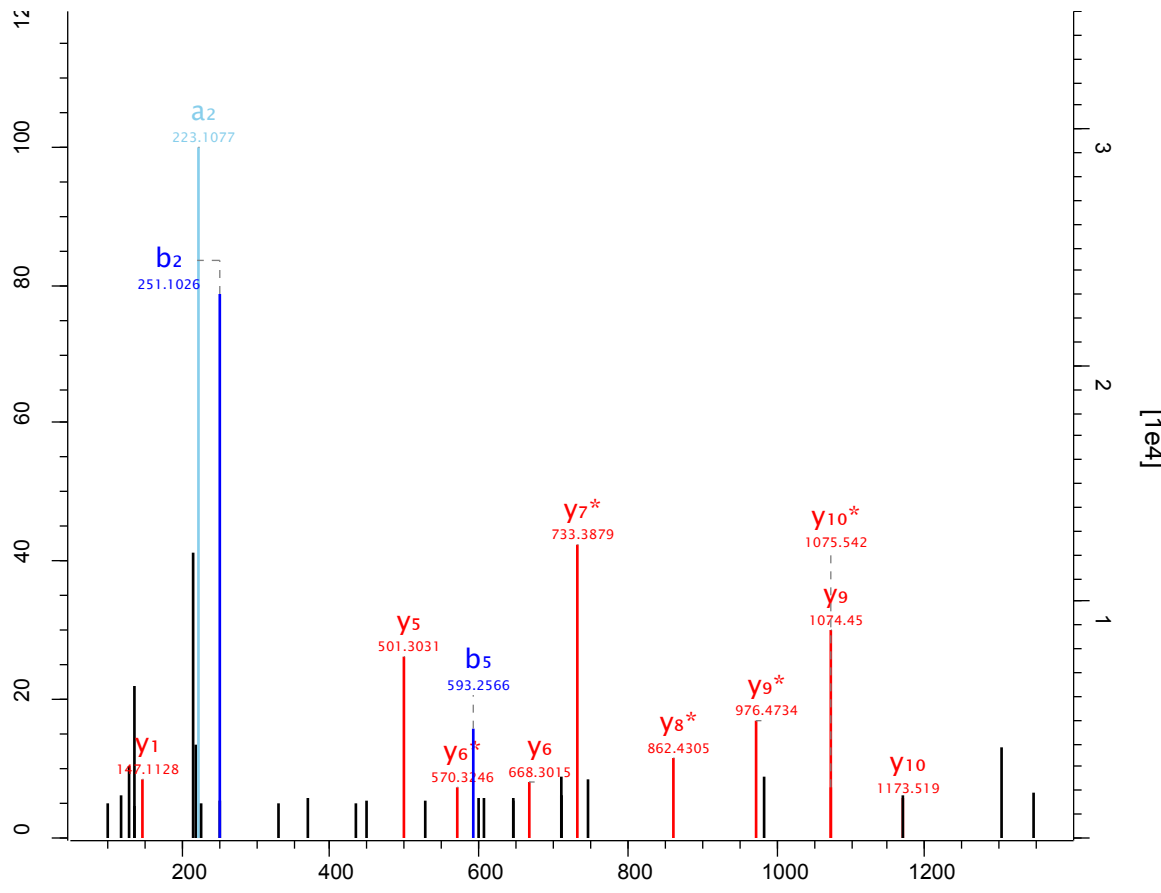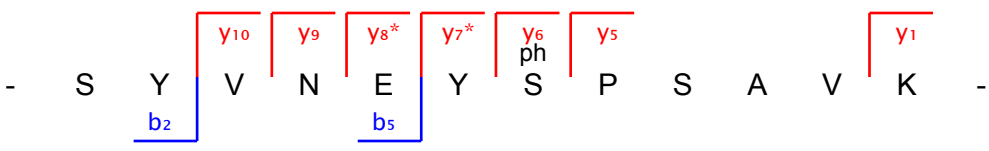

Raw file 2013\_COL15\_38\_45 Scan 13037 Method FTMS; HCD Score 52 m/z 621.26

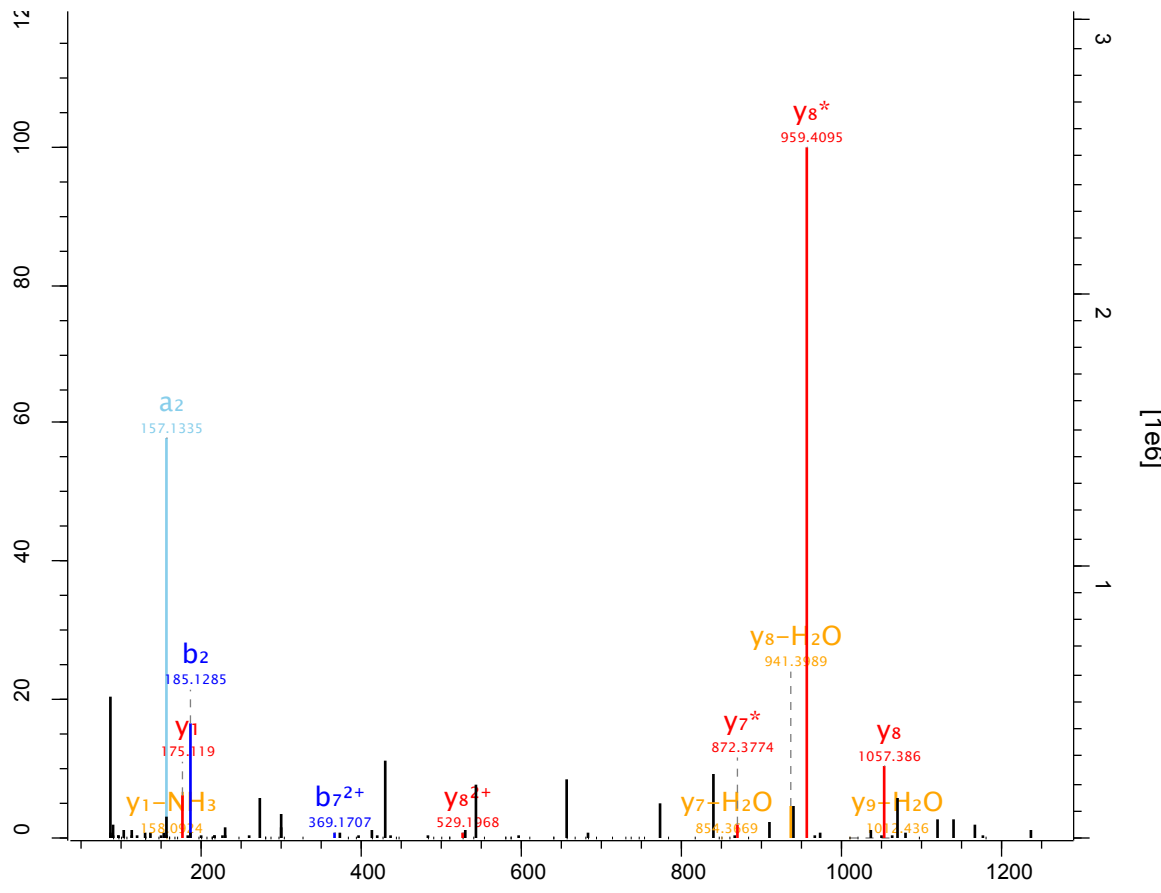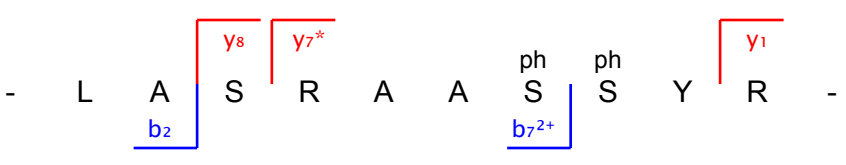

| Raw file         | Scan  | Method    | Score | m/z    |
|------------------|-------|-----------|-------|--------|
| 2013_COL15_38_45 | 13189 | FTMS; HCD | 72.58 | 674.81 |

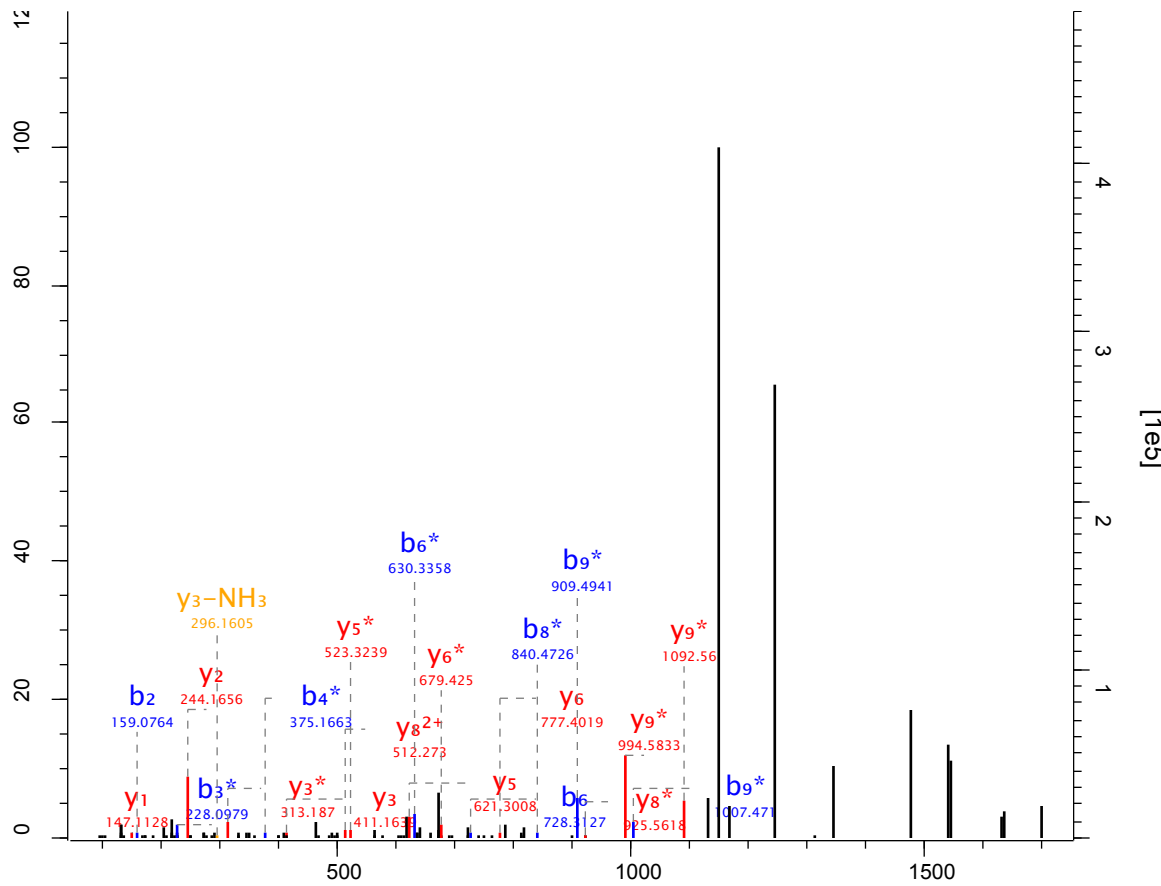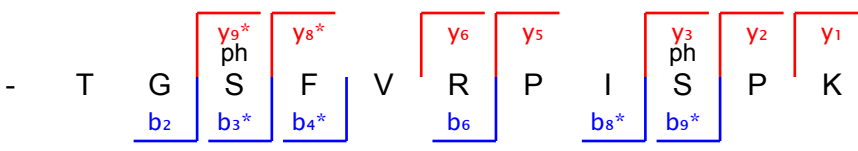

Raw file Scan Method Score m/z  
 2013\_COL15\_38\_45 13459 FTMS; HCD 110.83 721.3

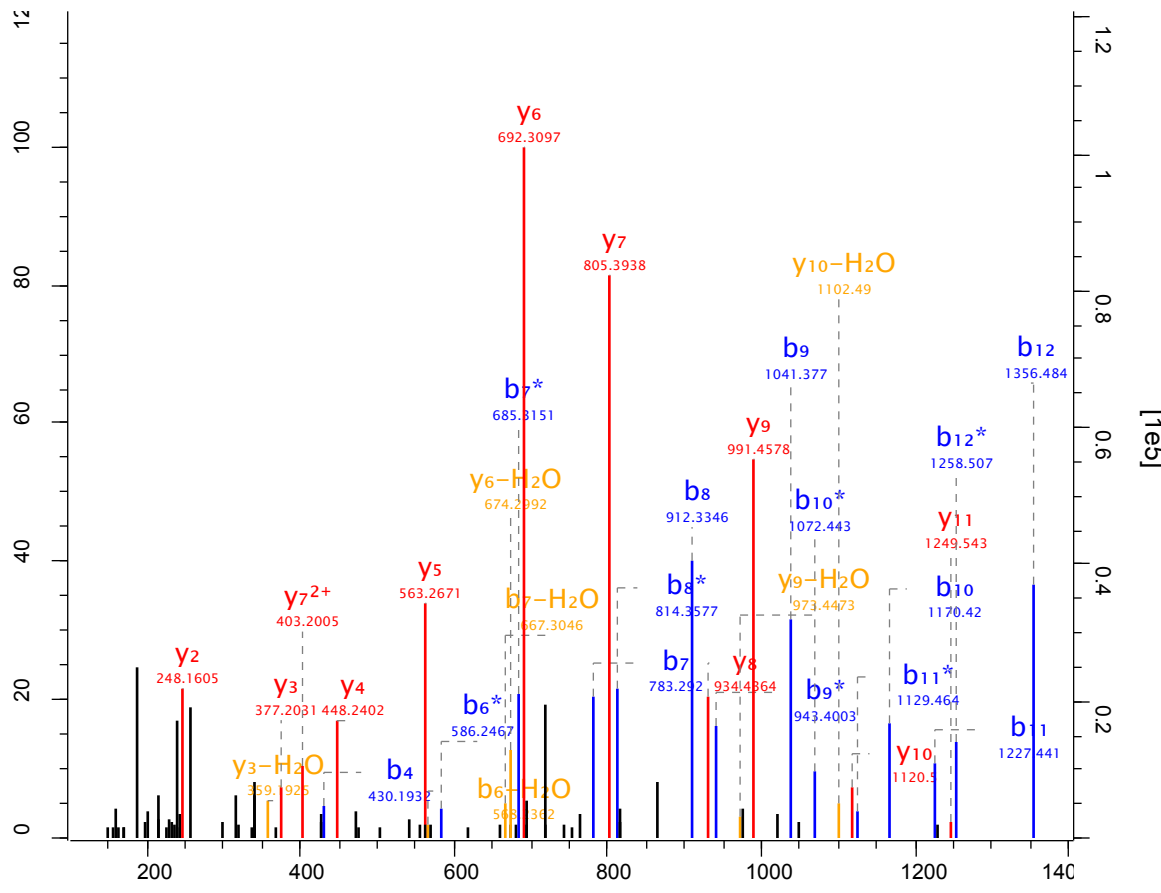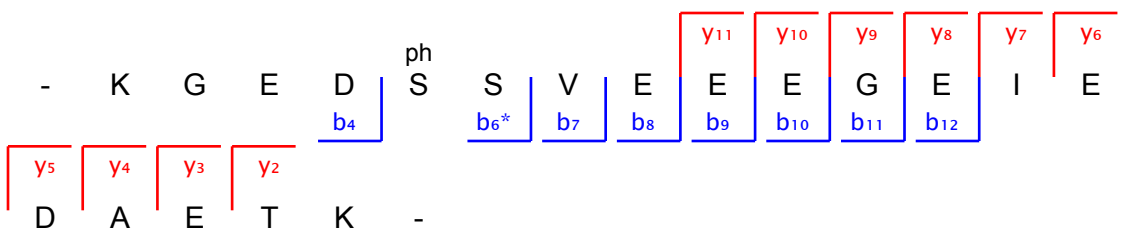

Raw file 2013\_COL15\_38\_45 Scan 13579 Method FTMS; HCD Score 102.07 m/z 667.96

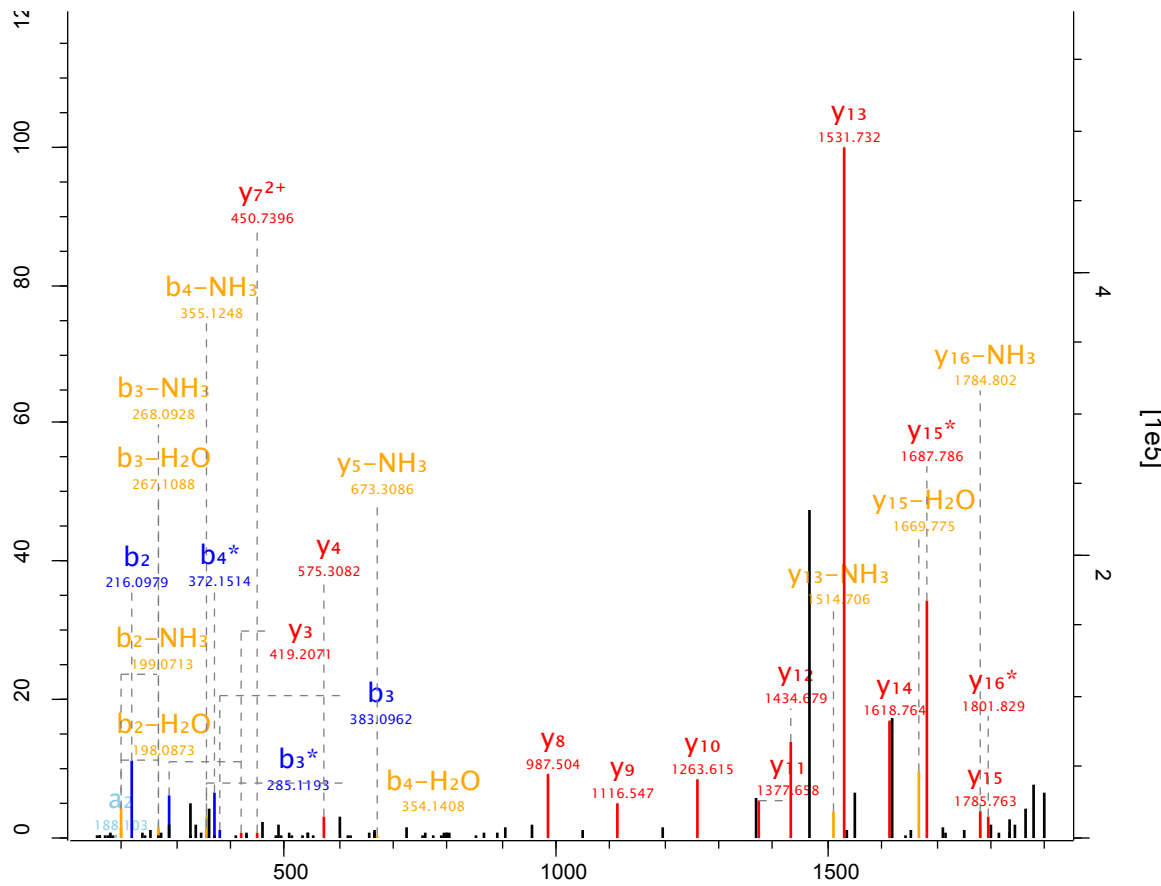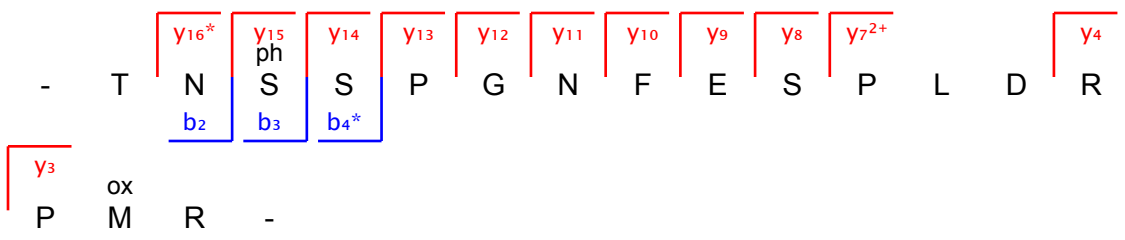



Raw file Scan Method Score m/z  
 2013\_COL15\_38\_45 1371 FTMS; HCD 101.05 589.93

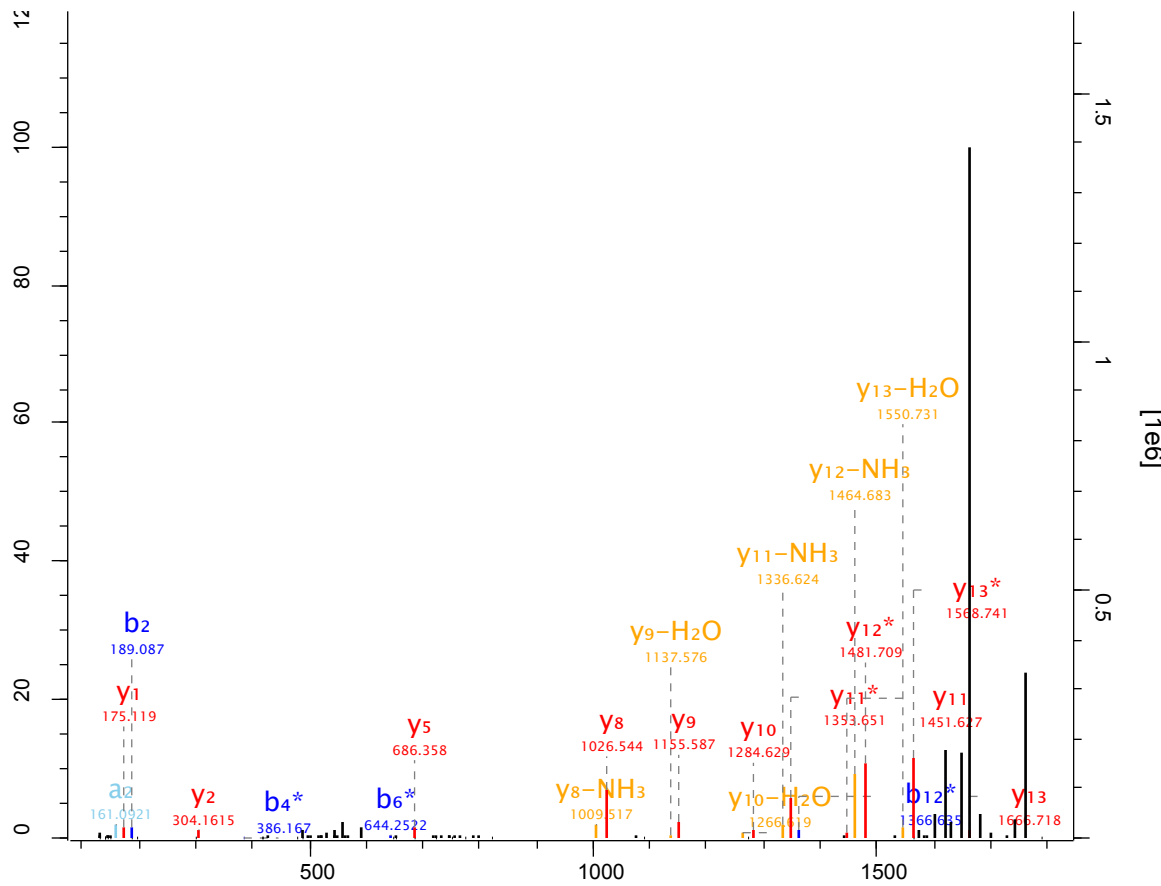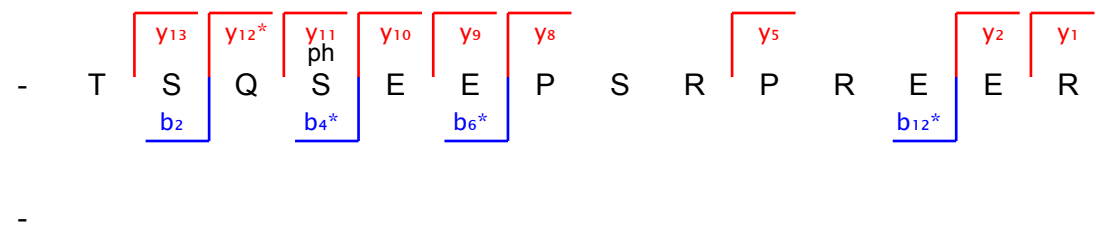

Raw file Scan Method Score m/z  
 2013\_COL15\_38\_45 1390 FTMS; HCD 60.25 517.19

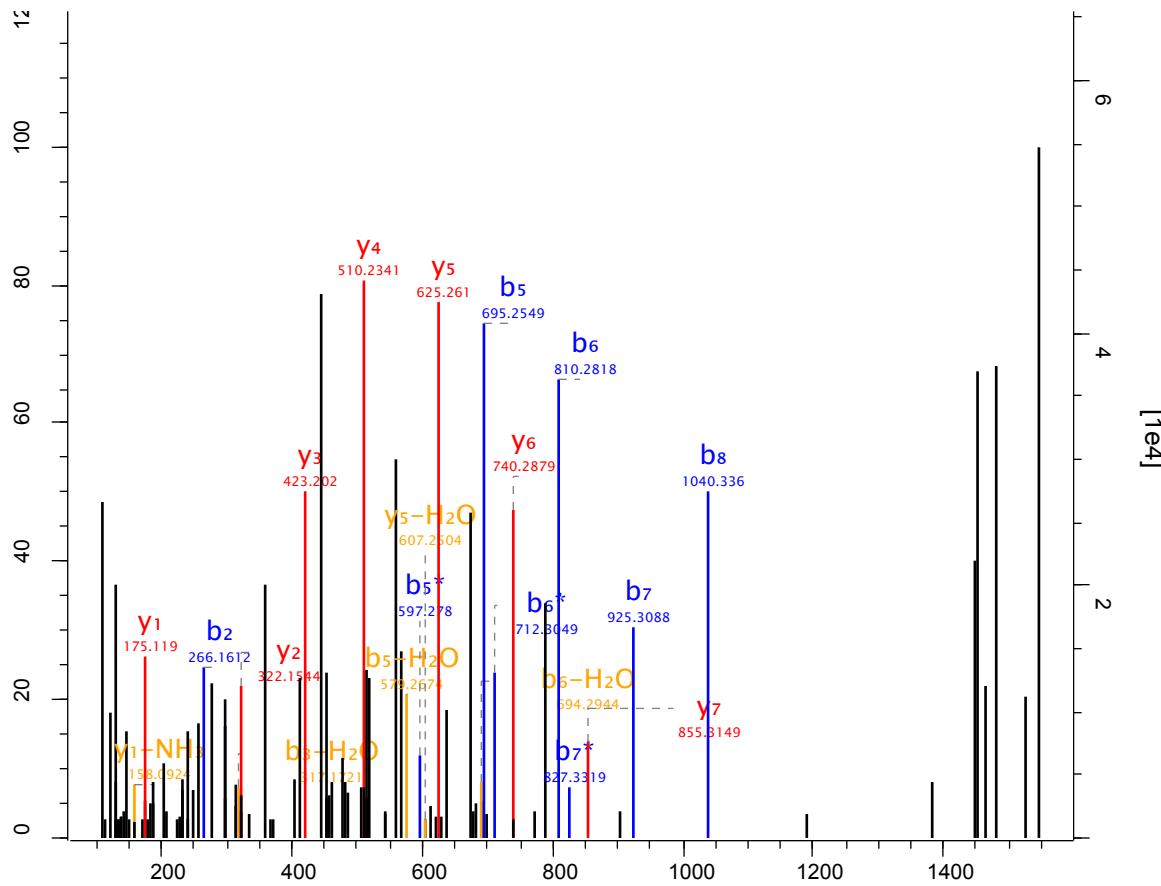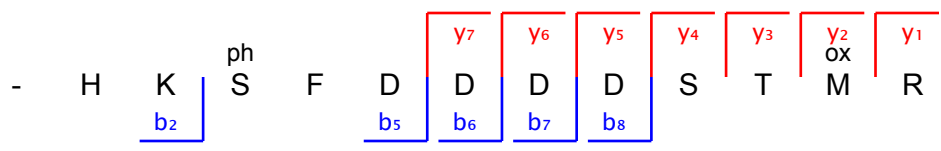

Raw file Scan Method Score m/z  
 2013\_COL15\_38\_45 1394 FTMS; HCD 159.65 623.5

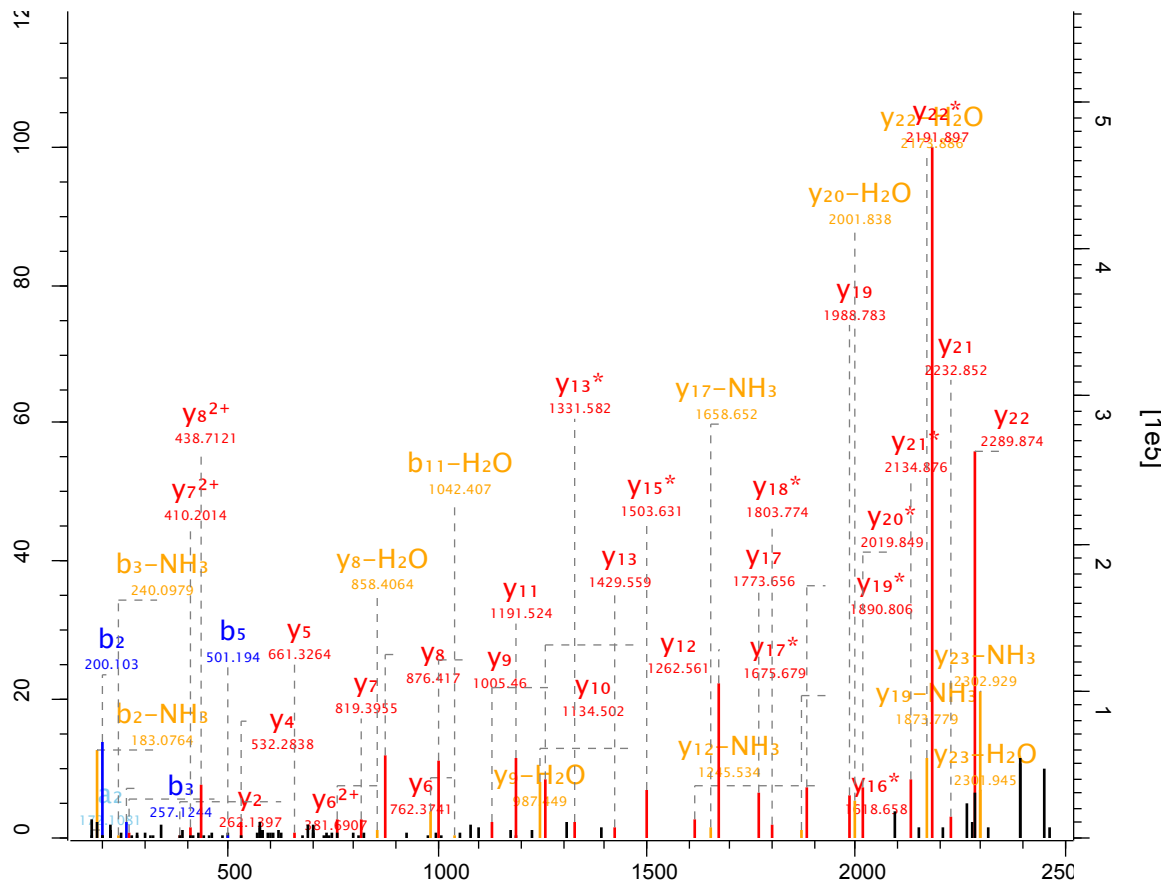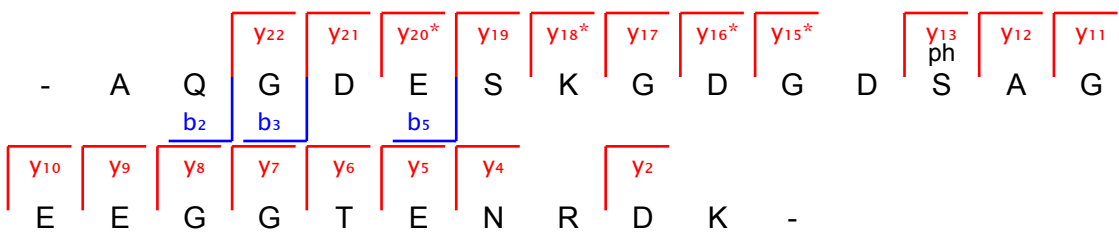

Raw file Scan Method Score m/z  
 2013\_COL15\_38\_45 14095 FTMS; HCD 162.19 741.6

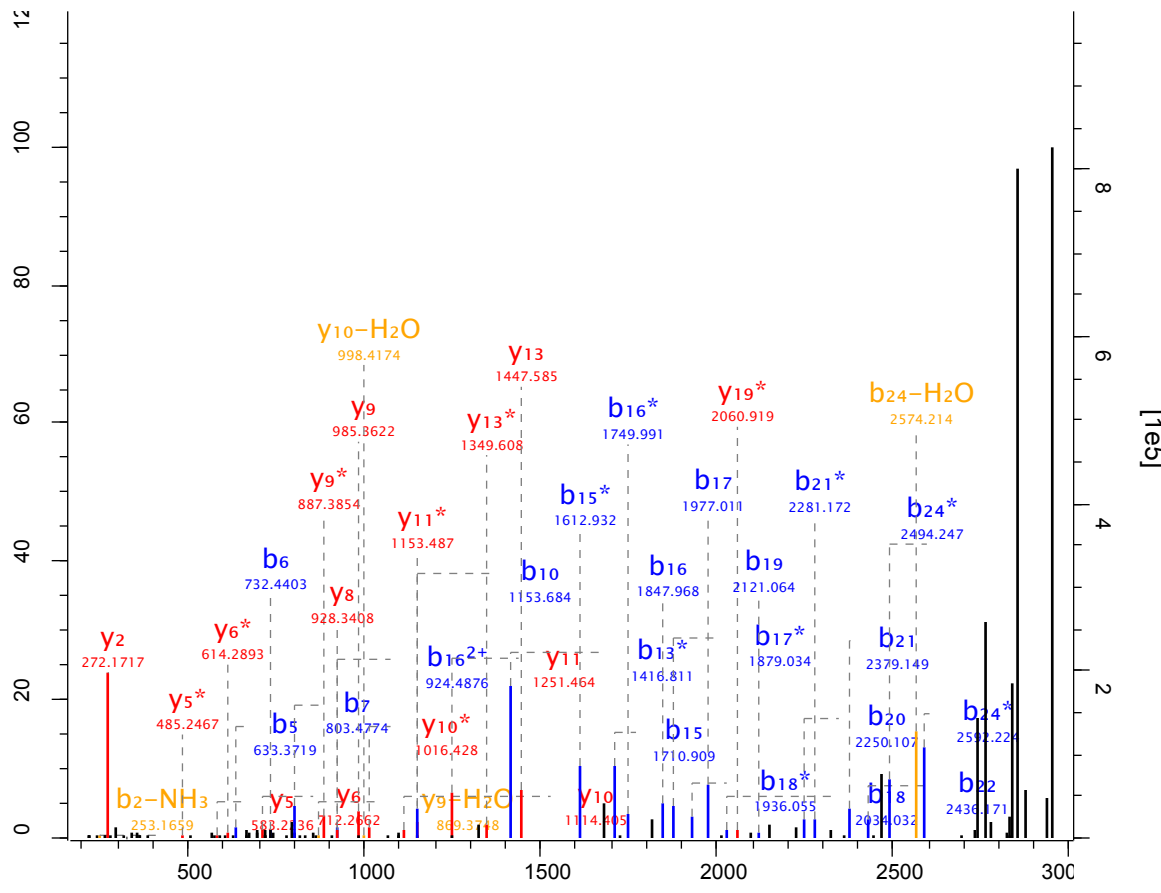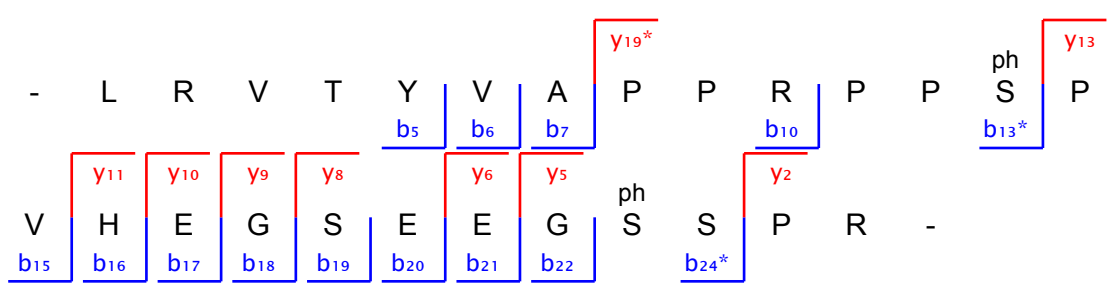

Raw file 2013\_COL15\_38\_45 Scan 14159 Method FTMS; HCD Score 53.03 m/z 880.87

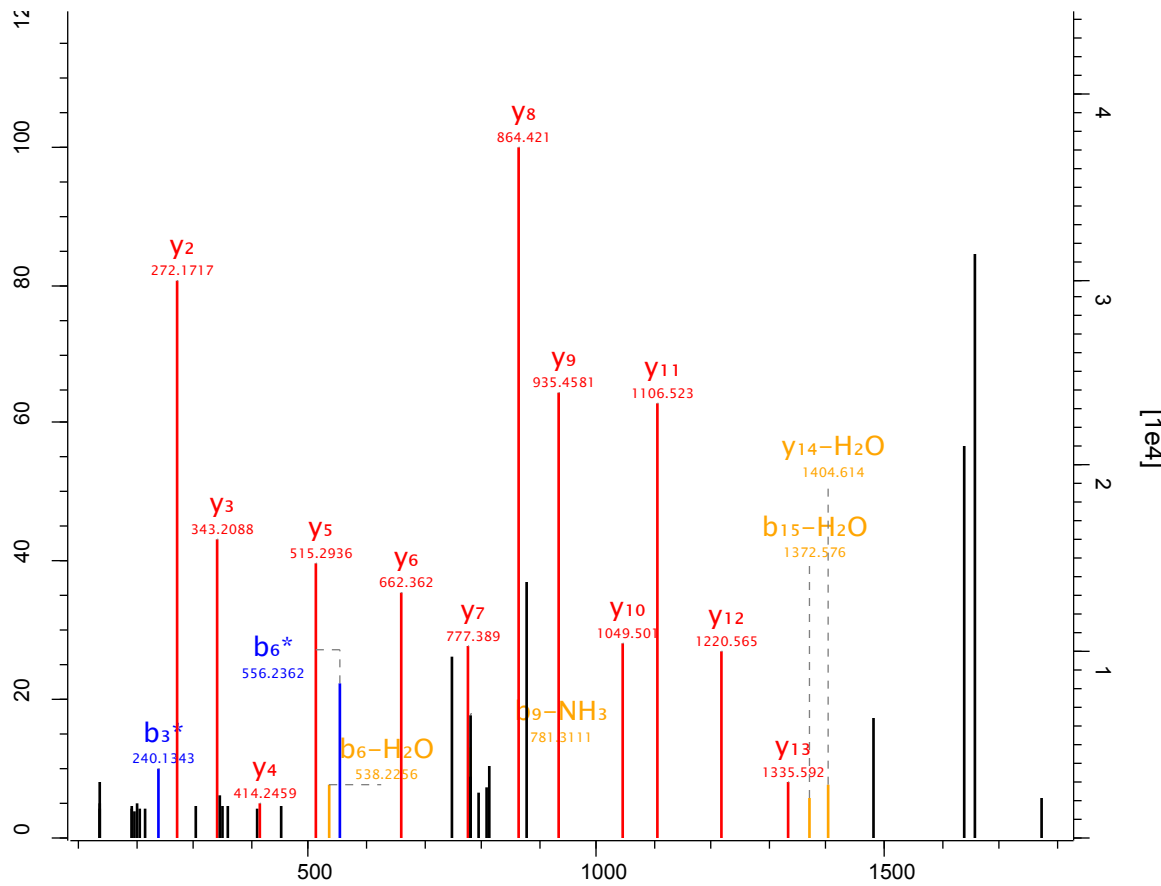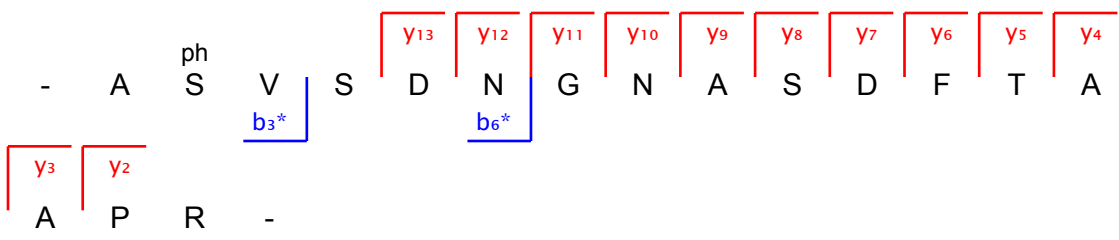

Raw file Scan Method Score m/z  
 2013\_COL15\_38\_45 14272 FTMS; HCD 44.25 692.78

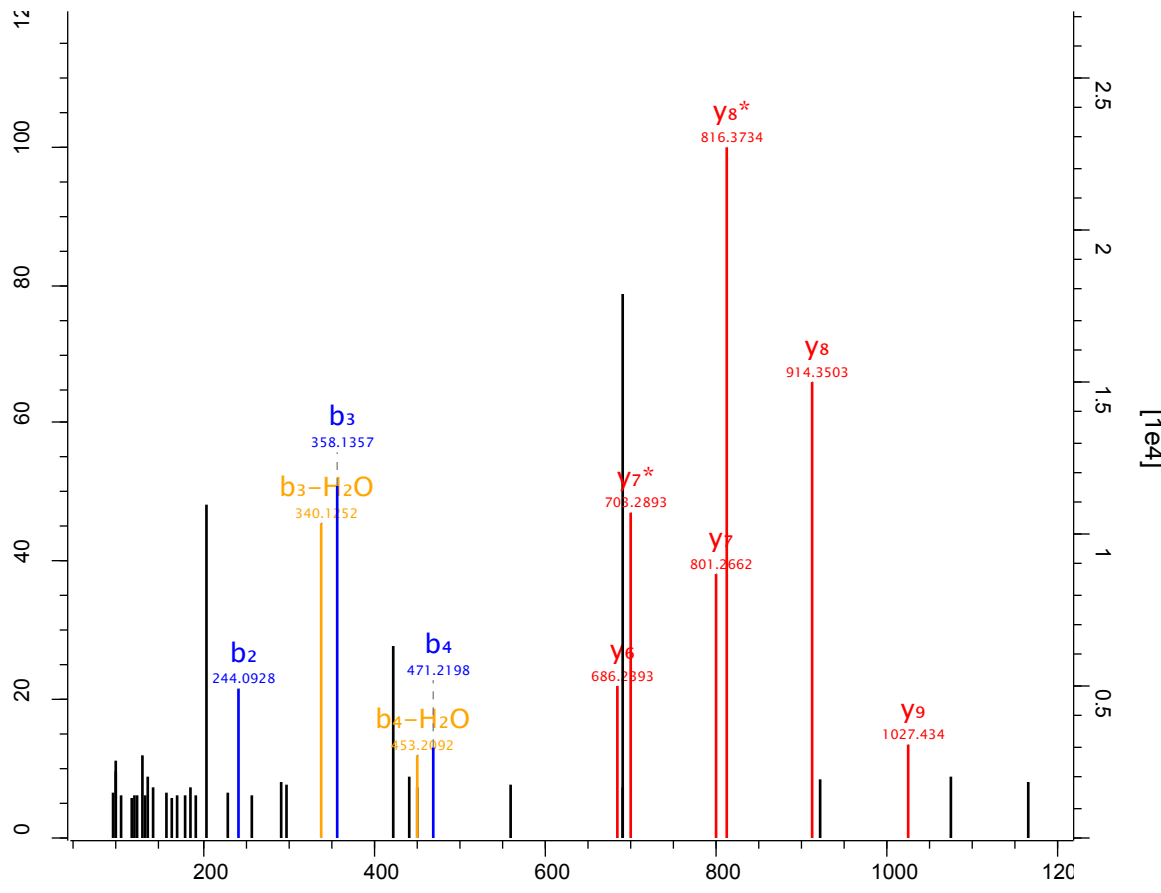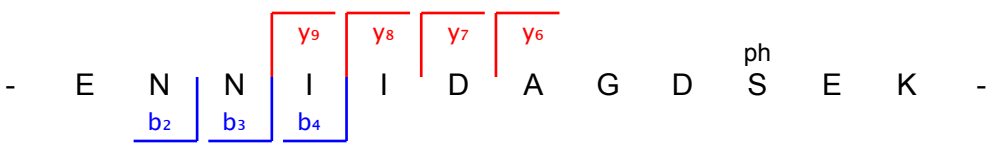

Raw file 2013\_COL15\_38\_45 Scan 14434 Method FTMS; HCD Score 89.47 m/z 807.35

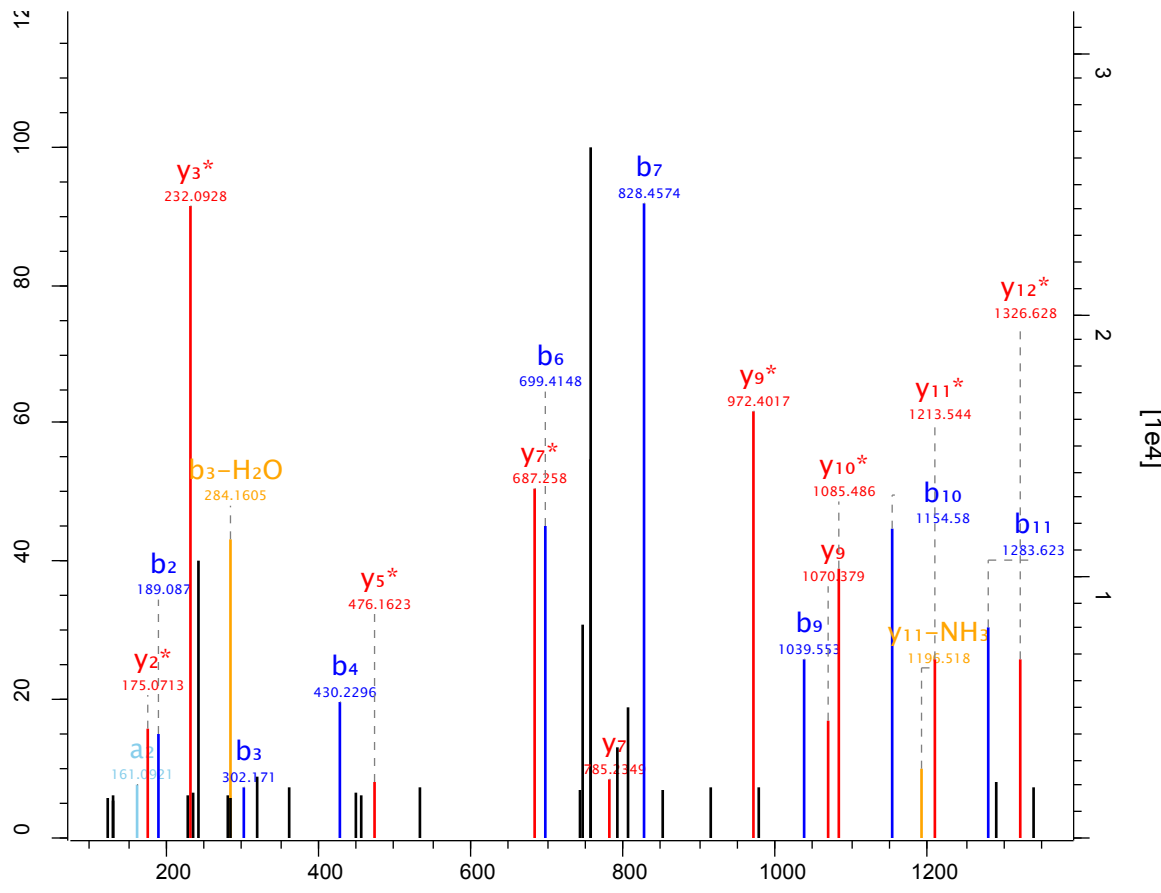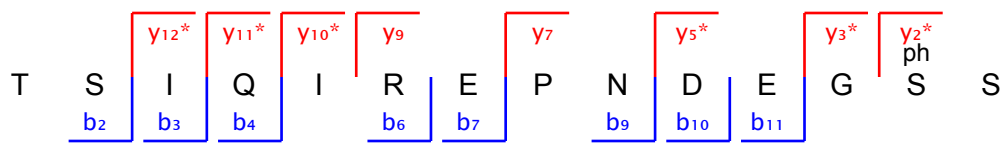





Raw file 2013\_COL15\_38\_45 Scan 14679 Method FTMS; HCD Score 74.14 m/z 816.34

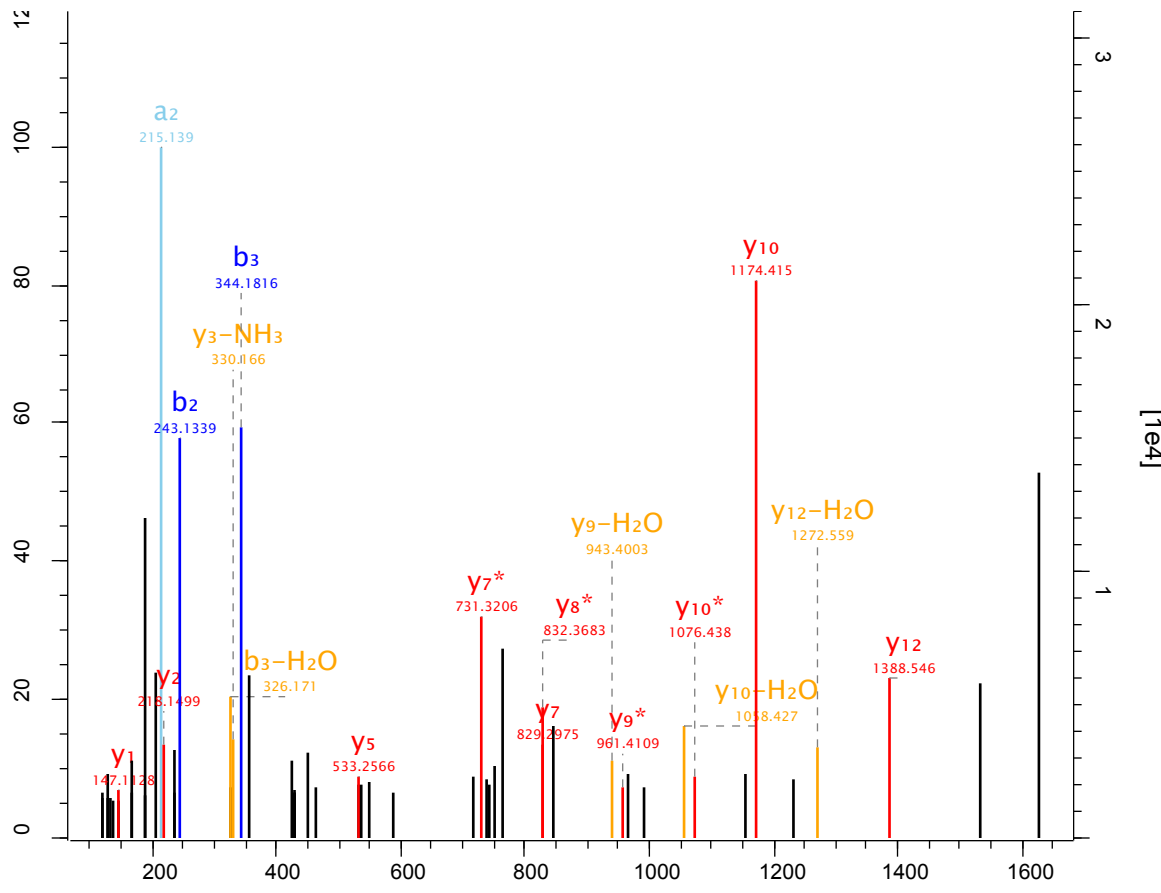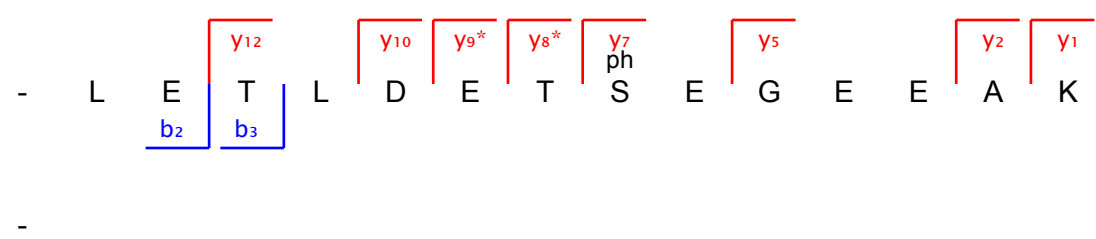

Raw file 2013\_COL15\_38\_45 Scan 14695 Method FTMS; HCD Score 79.47 m/z 921.38

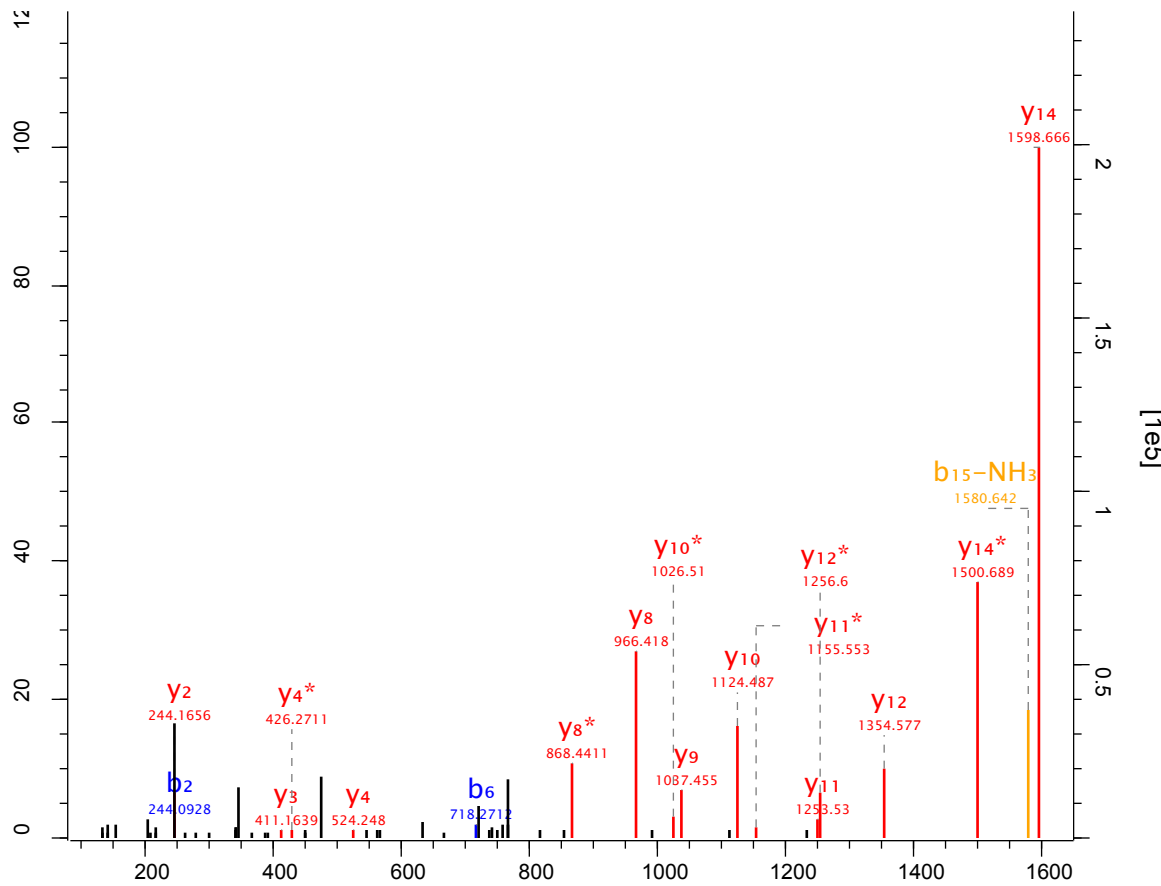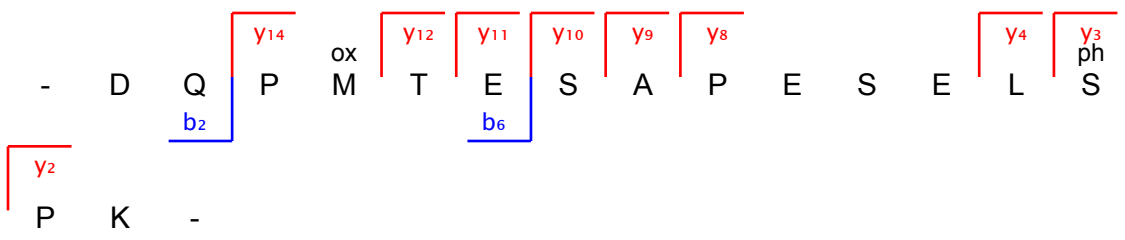

Raw file 2013\_COL15\_38\_45 Scan 14698 Method FTMS; HCD Score 117.7 m/z 629.3

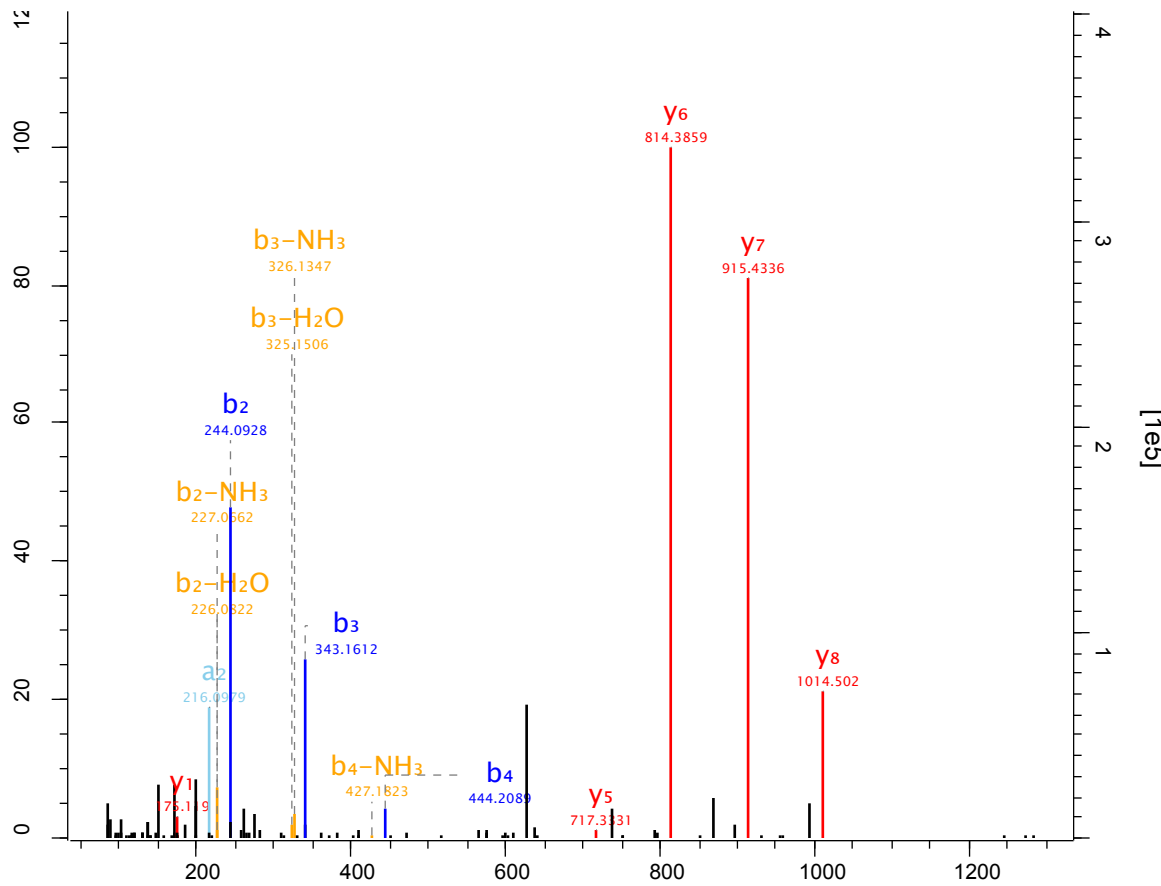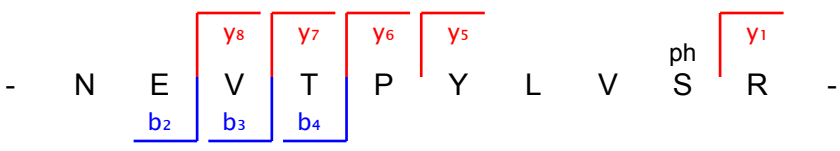

Raw file 2013\_COL15\_38\_45 Scan 14700 Method FTMS; HCD Score 128.88 m/z 933.91

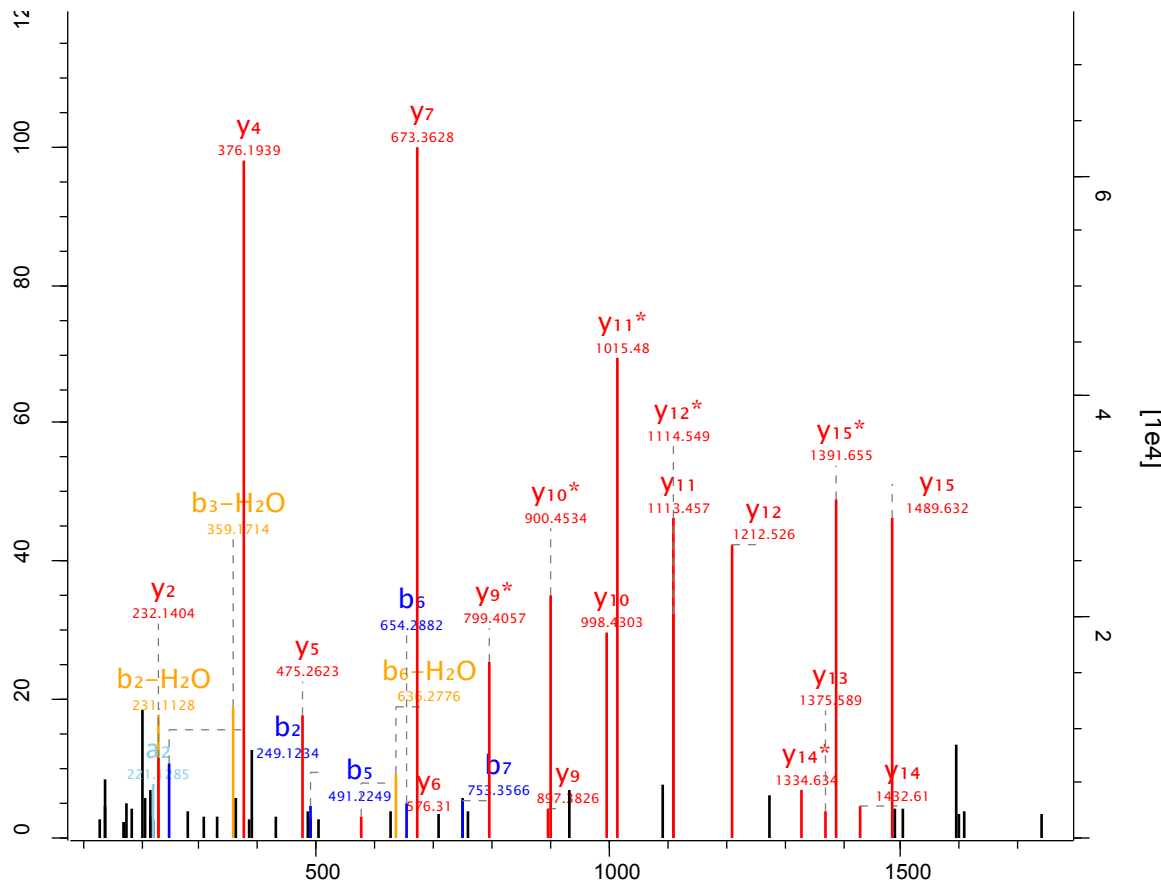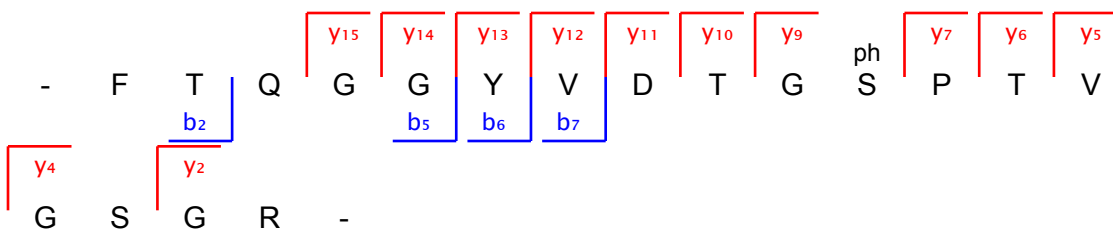

Raw file

Scan

Method

Score

m/z

2013\_COL15\_38\_45

1476

FTMS; HCD

96.46

468.9

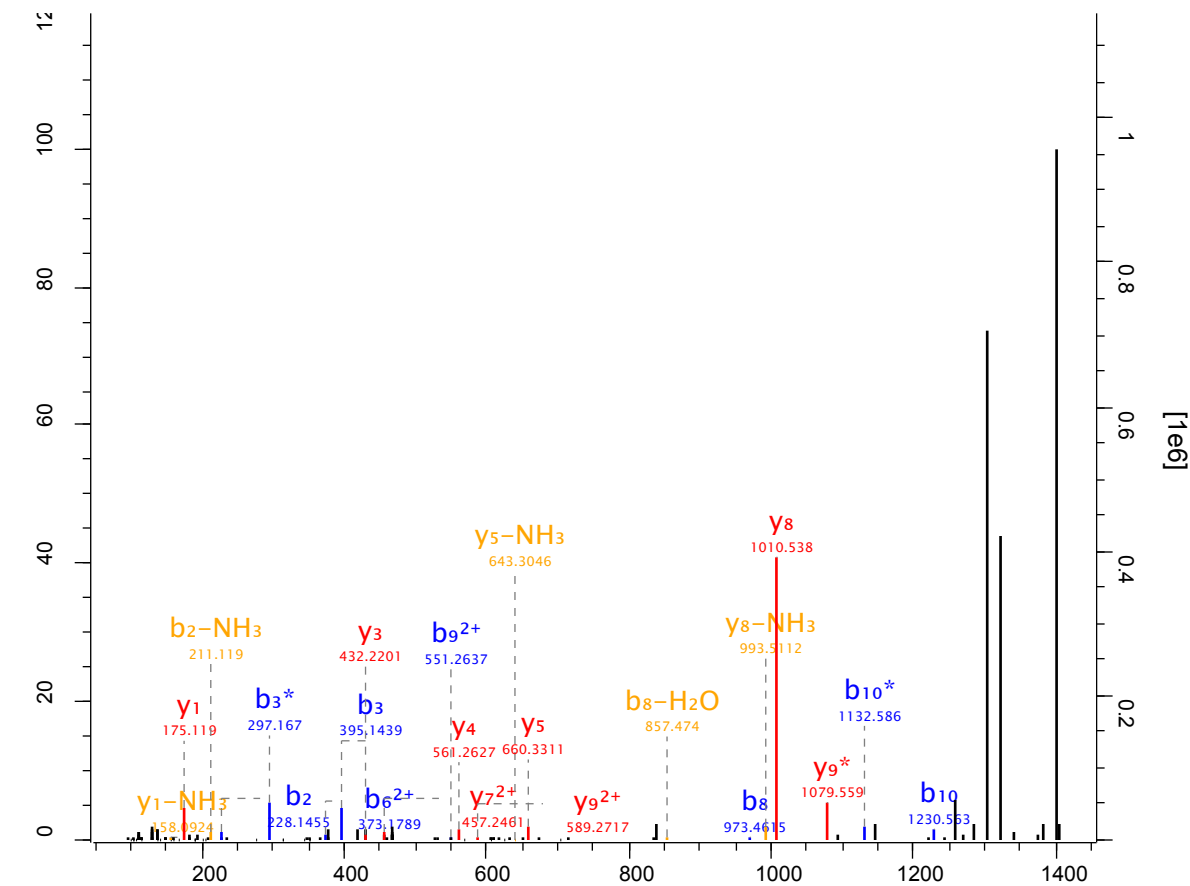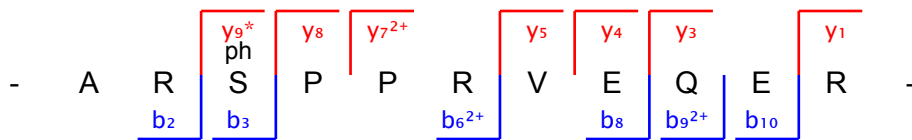

| Raw file         | Scan | Method    | Score | m/z    |
|------------------|------|-----------|-------|--------|
| 2013_COL15_38_45 | 1486 | FTMS; HCD | 68.09 | 653.63 |

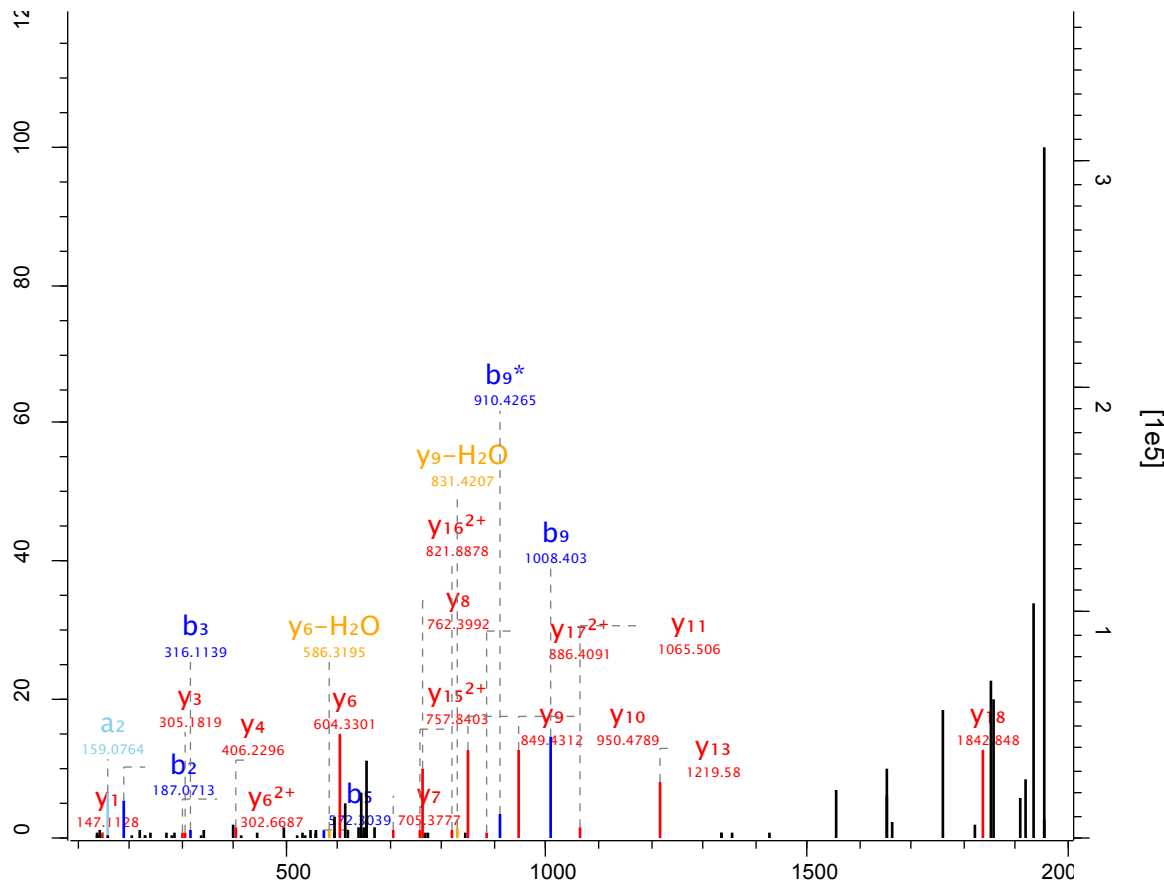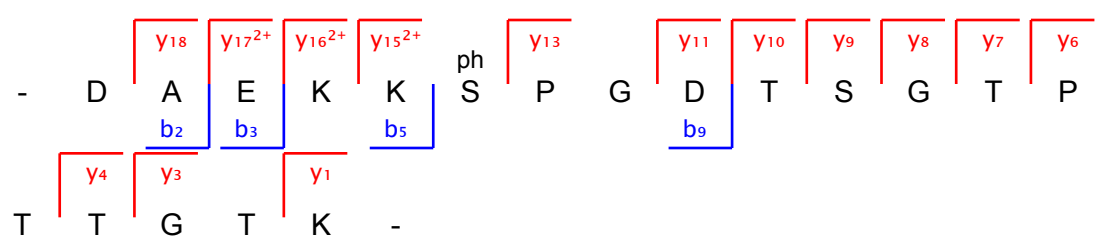

Raw file 2013\_COL15\_38\_45 Scan 15033 Method FTMS; HCD Score 50.18 m/z 692.8

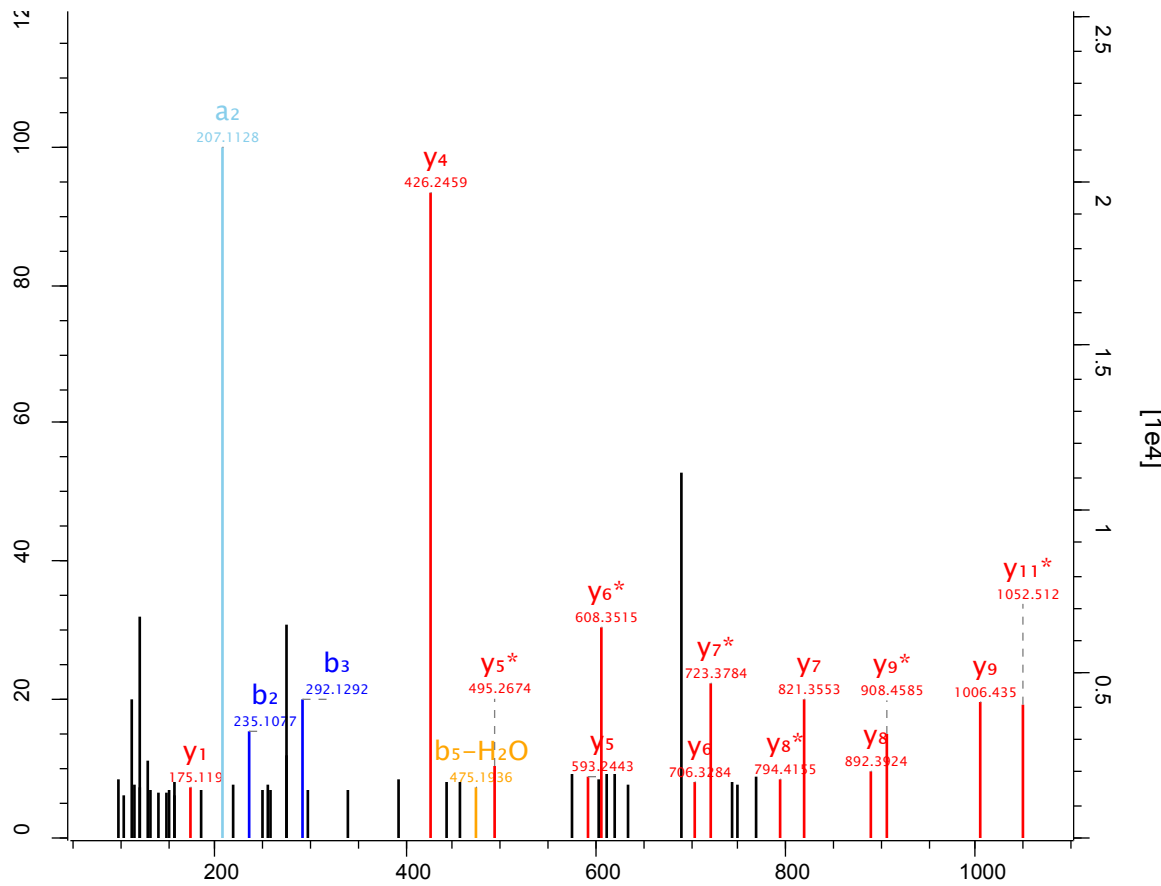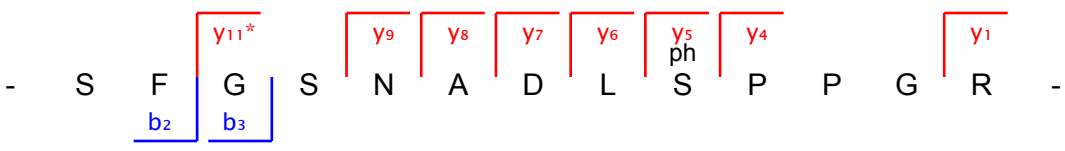

Raw file Scan Method Score m/z  
 2013\_COL15\_38\_45 1504 FTMS; HCD 93.58 605.94

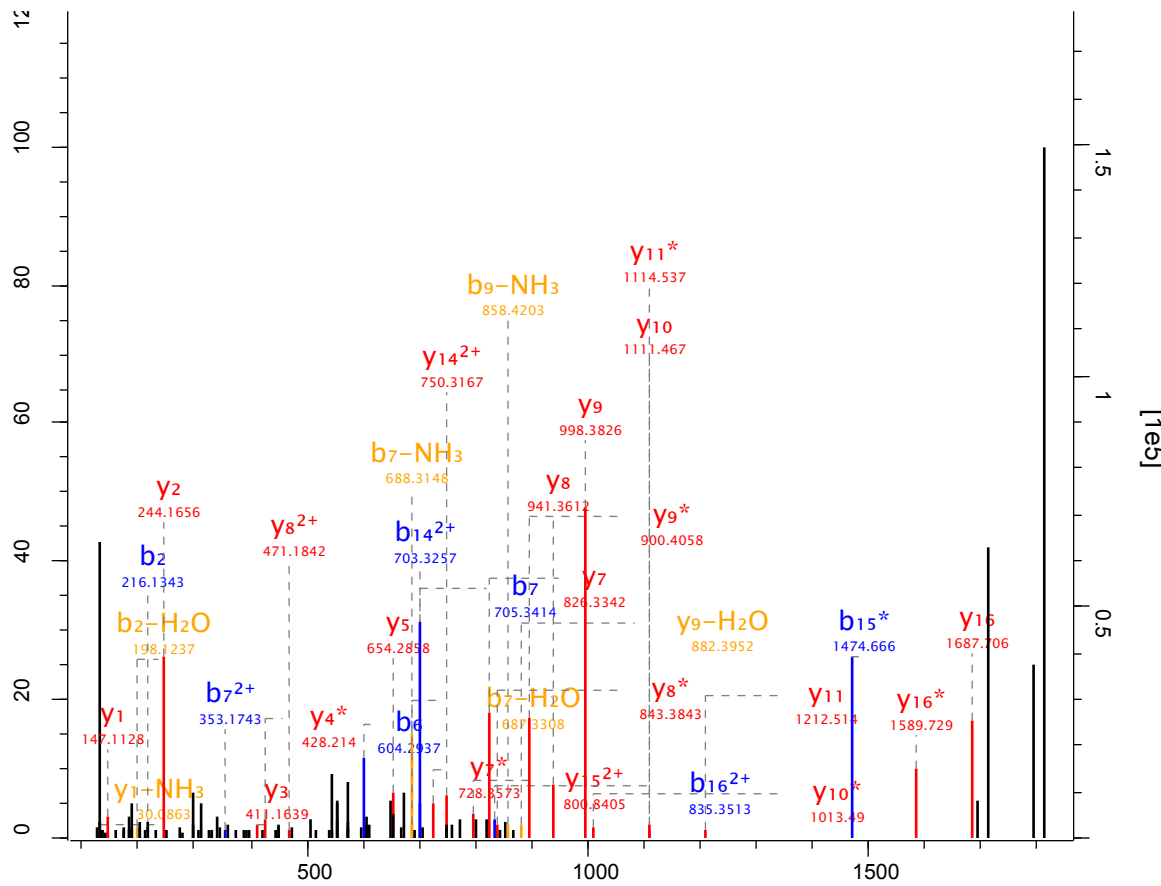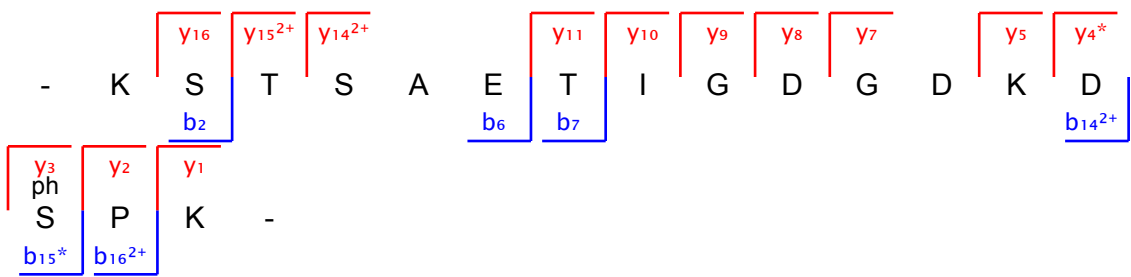





Raw file Scan Method Score m/z  
 2013\_COL15\_38\_45 15399 FTMS; HCD 44.39 553.89

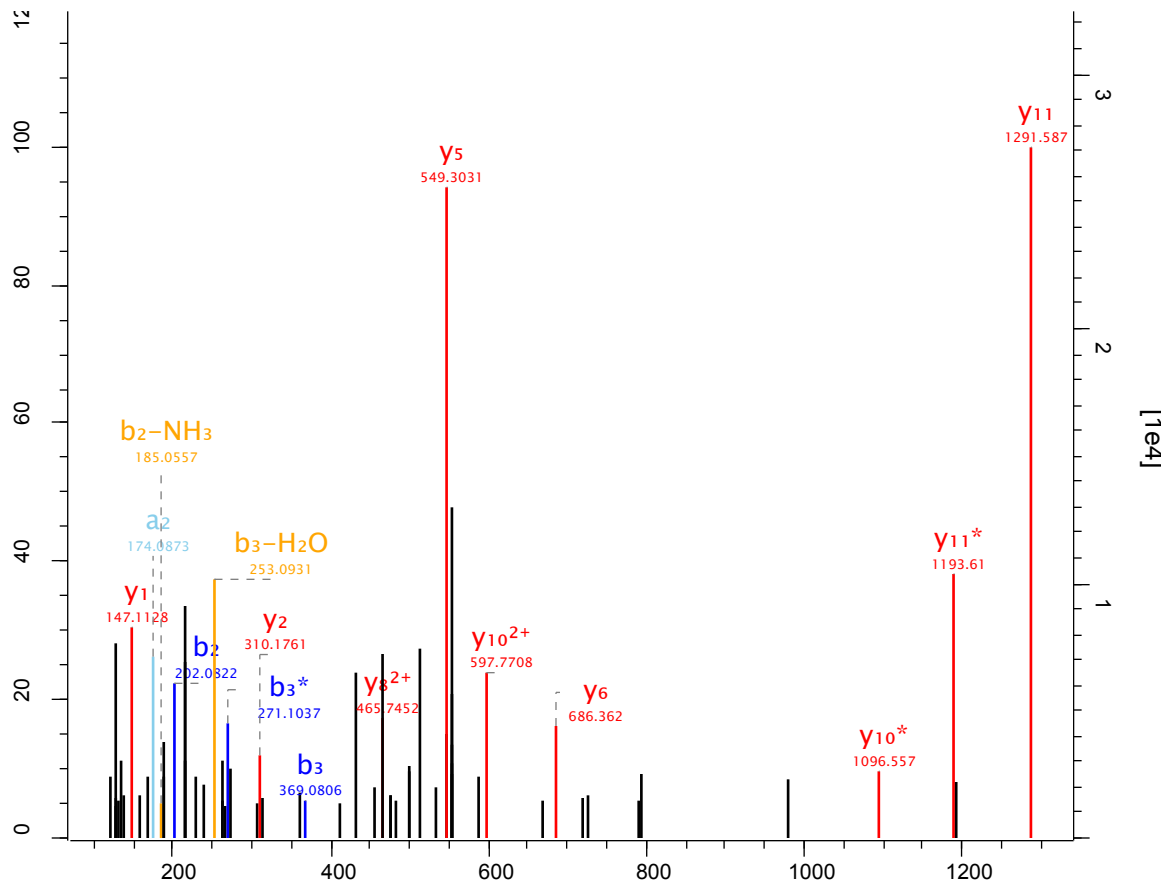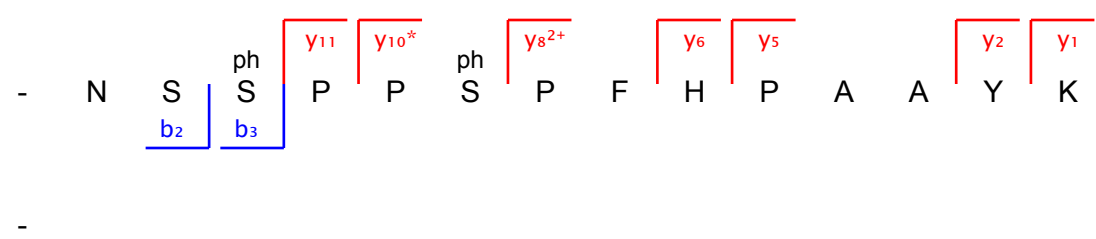

| Raw file         | Scan  | Method    | Score | m/z    |
|------------------|-------|-----------|-------|--------|
| 2013_COL15_38_45 | 15495 | FTMS; HCD | 64.04 | 538.73 |

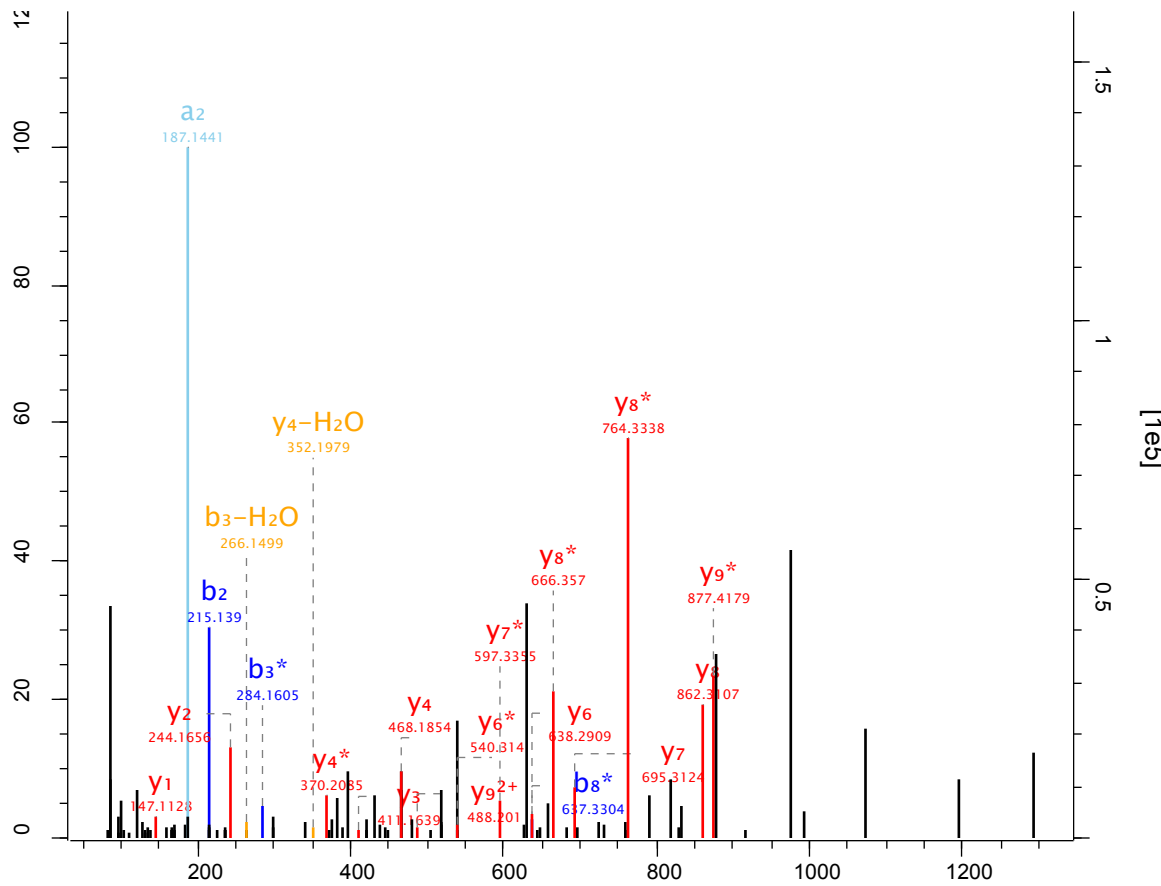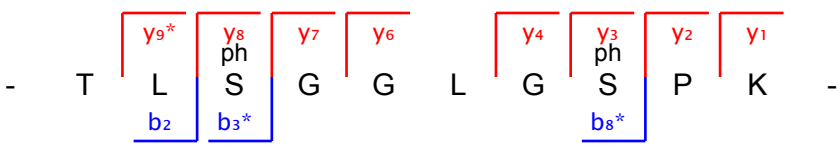

Raw file Scan Method Score m/z  
 2013\_COL15\_38\_45 15970 FTMS; HCD 67.22 660.95

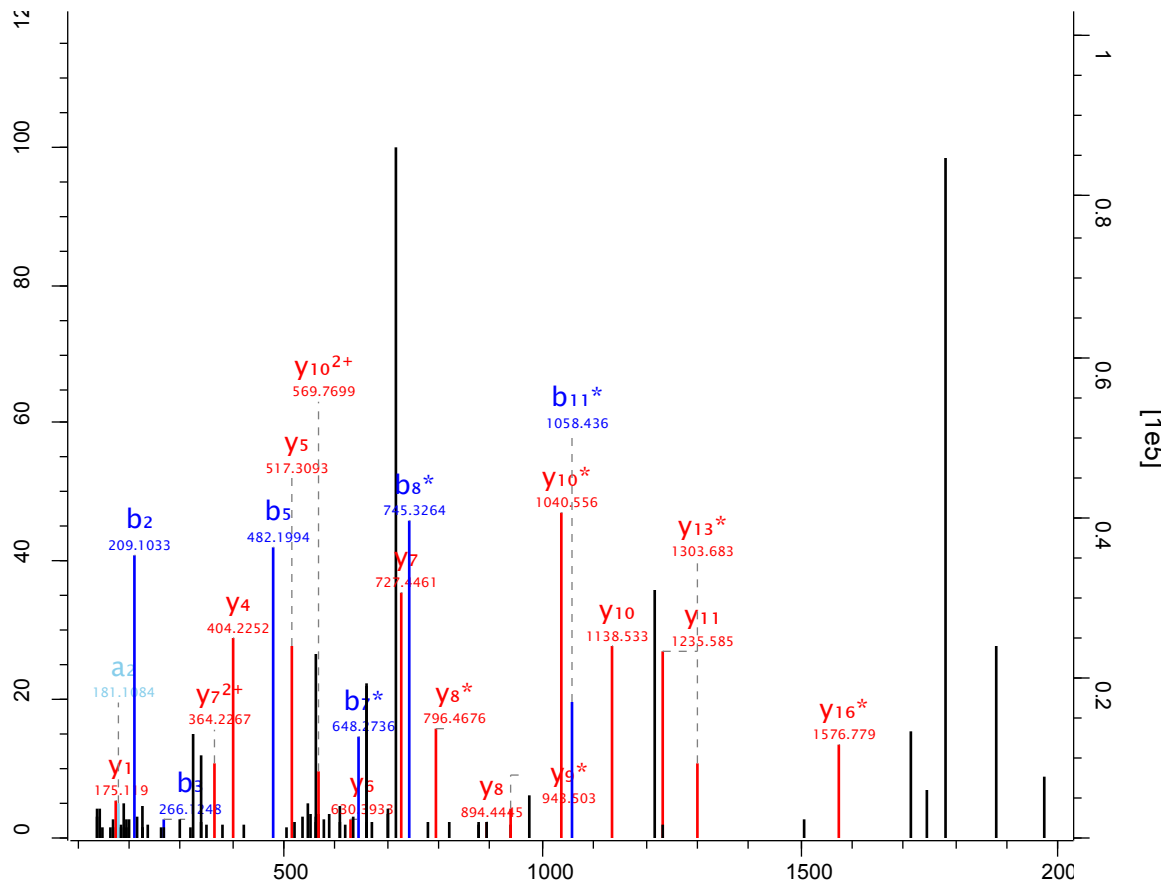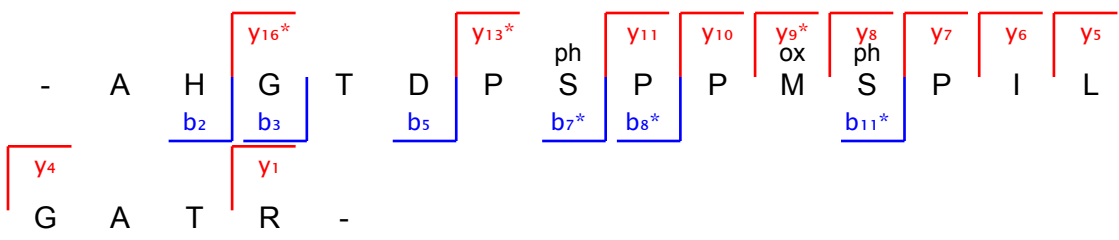

Raw file Scan Method Score m/z  
 2013\_COL15\_38\_45 16114 FTMS; HCD 101.05 791.85

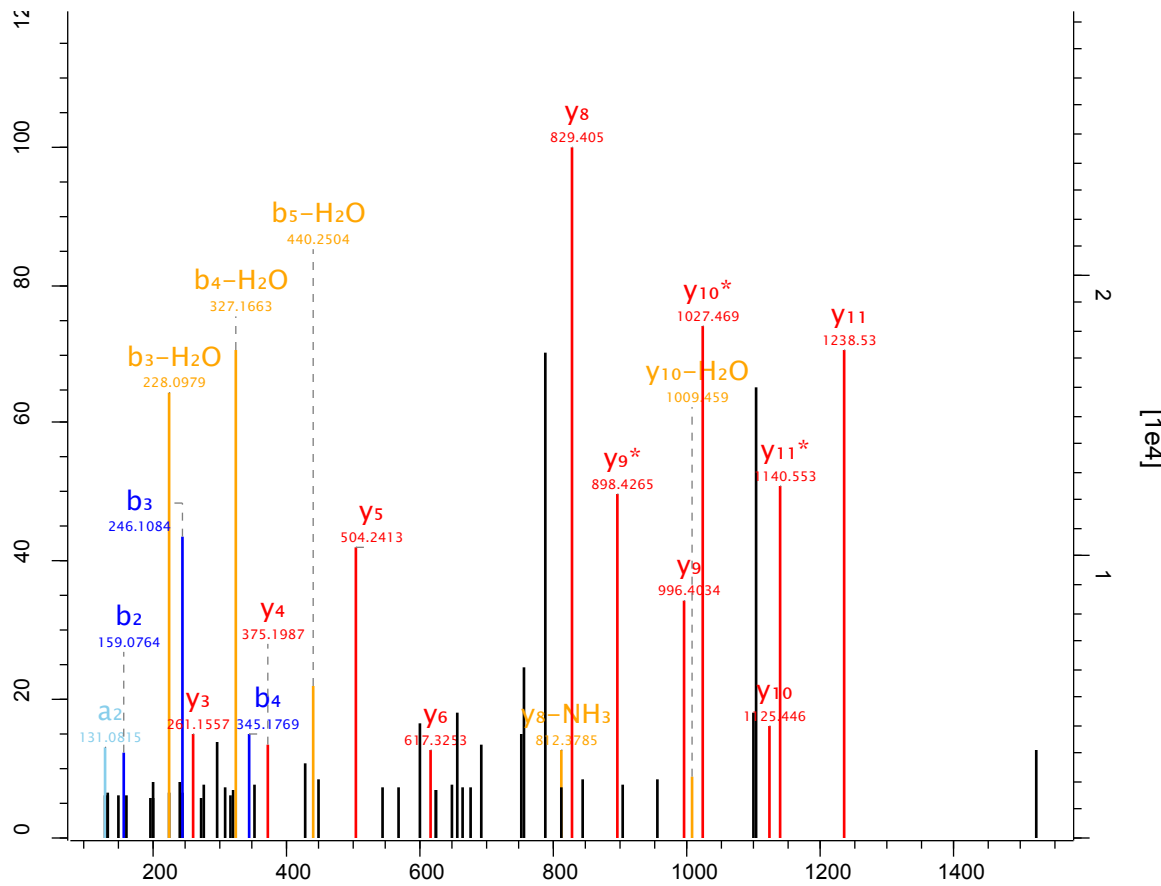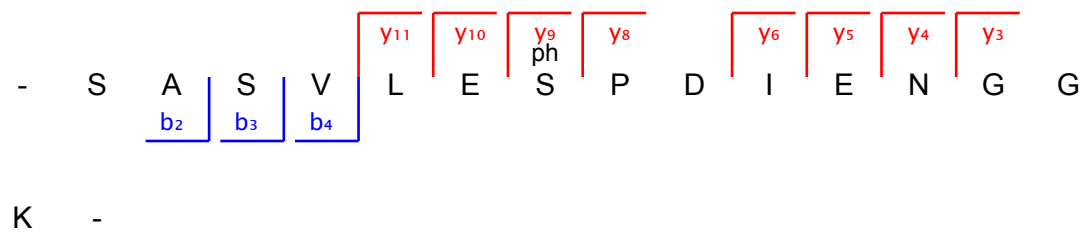

Raw file 2013\_COL15\_38\_45 Scan 16208 Method FTMS; HCD Score 190.18 m/z 649.25

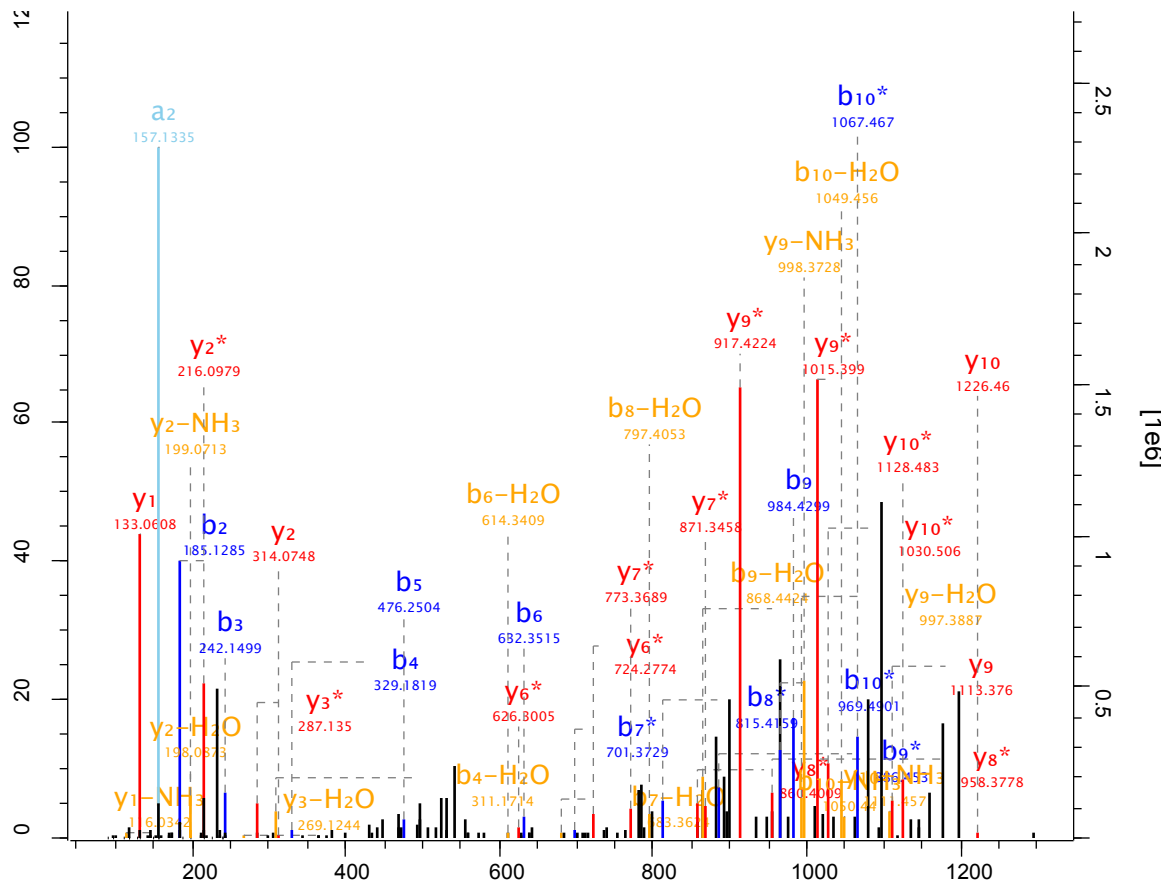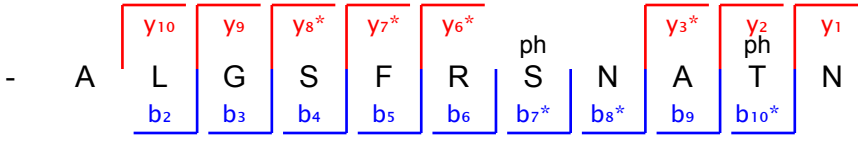

Raw file Scan Method Score m/z  
 2013\_COL15\_38\_45 1646 FTMS; HCD 95.68 510.23

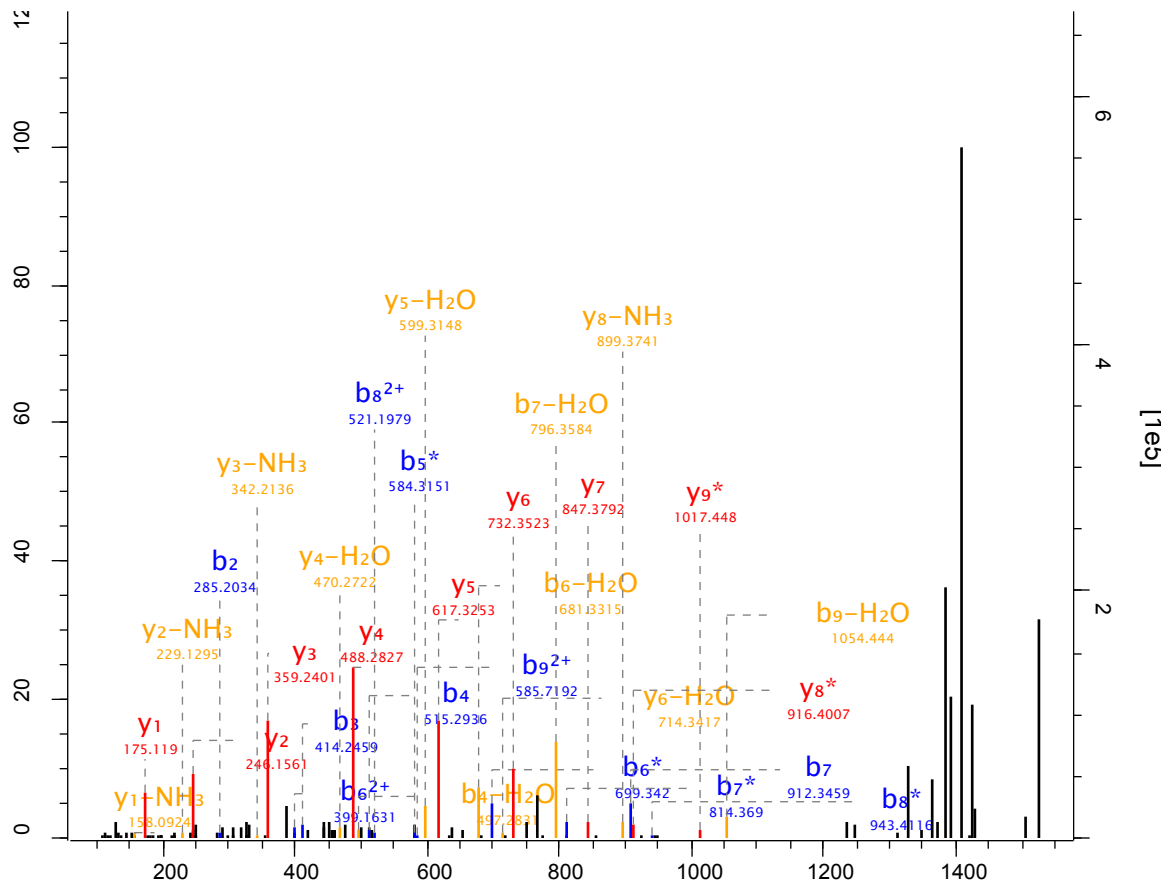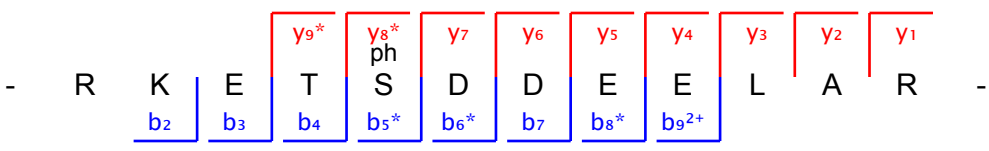

Raw file Scan Method Score m/z  
 2013\_COL15\_38\_45 1672 FTMS; HCD 209.23 566.58

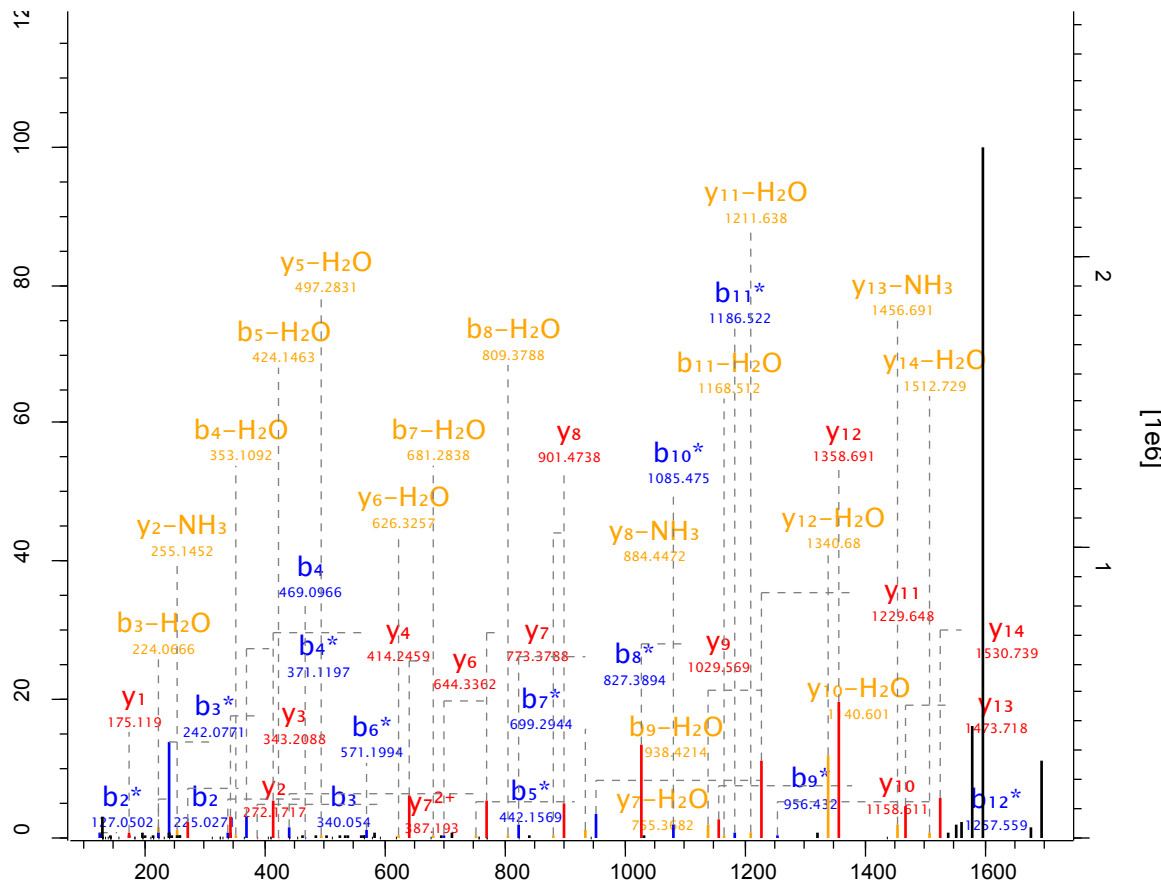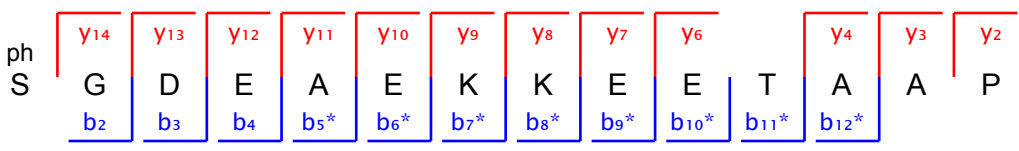

y1  
R



Raw file Scan Method Score m/z  
 2013\_COL15\_38\_45 17063 FTMS; HCD 50.09 706.83

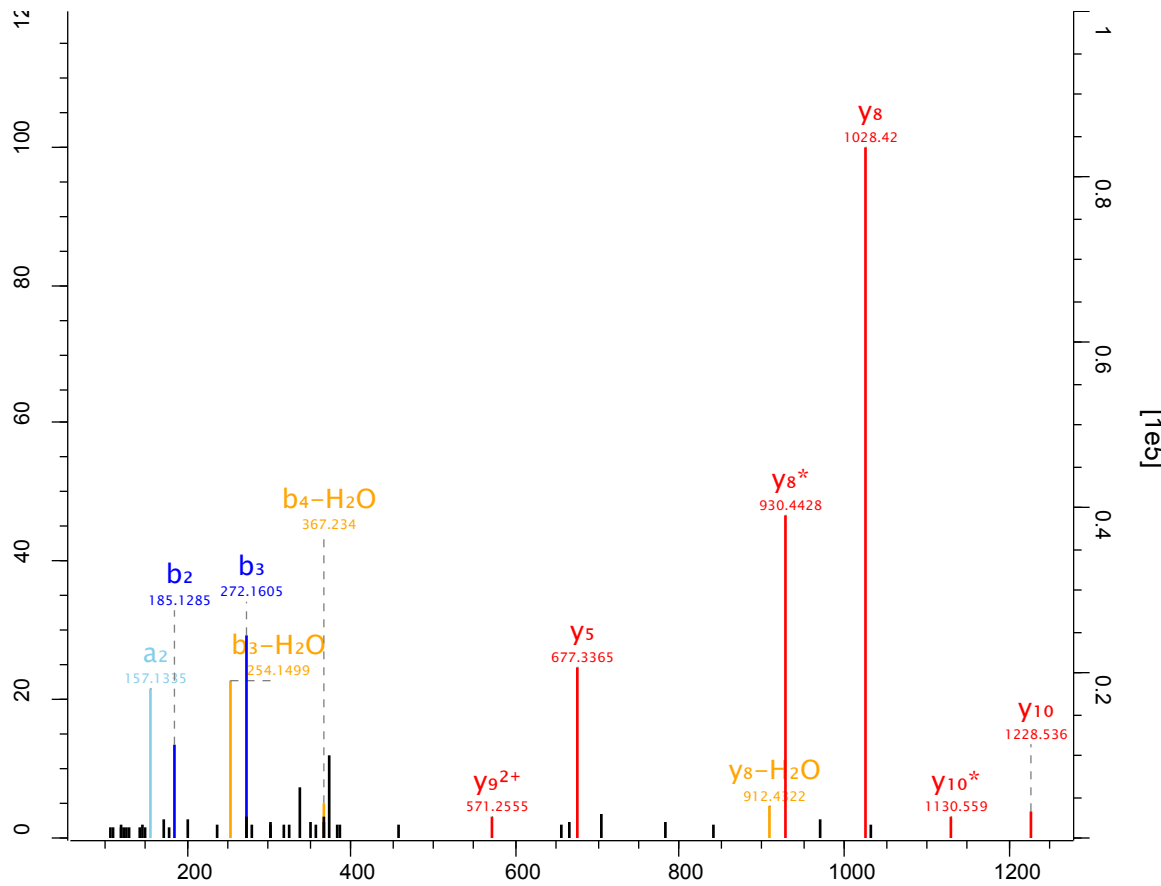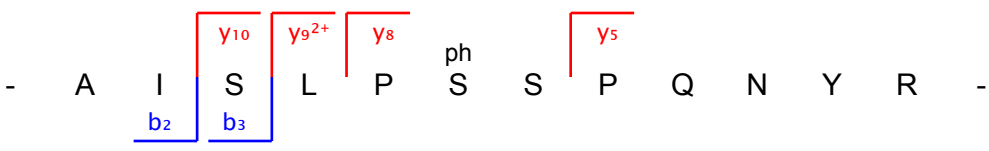

Raw file Scan Method Score m/z  
 2013\_COL15\_38\_45 17107 FTMS; HCD 76.38 711.84

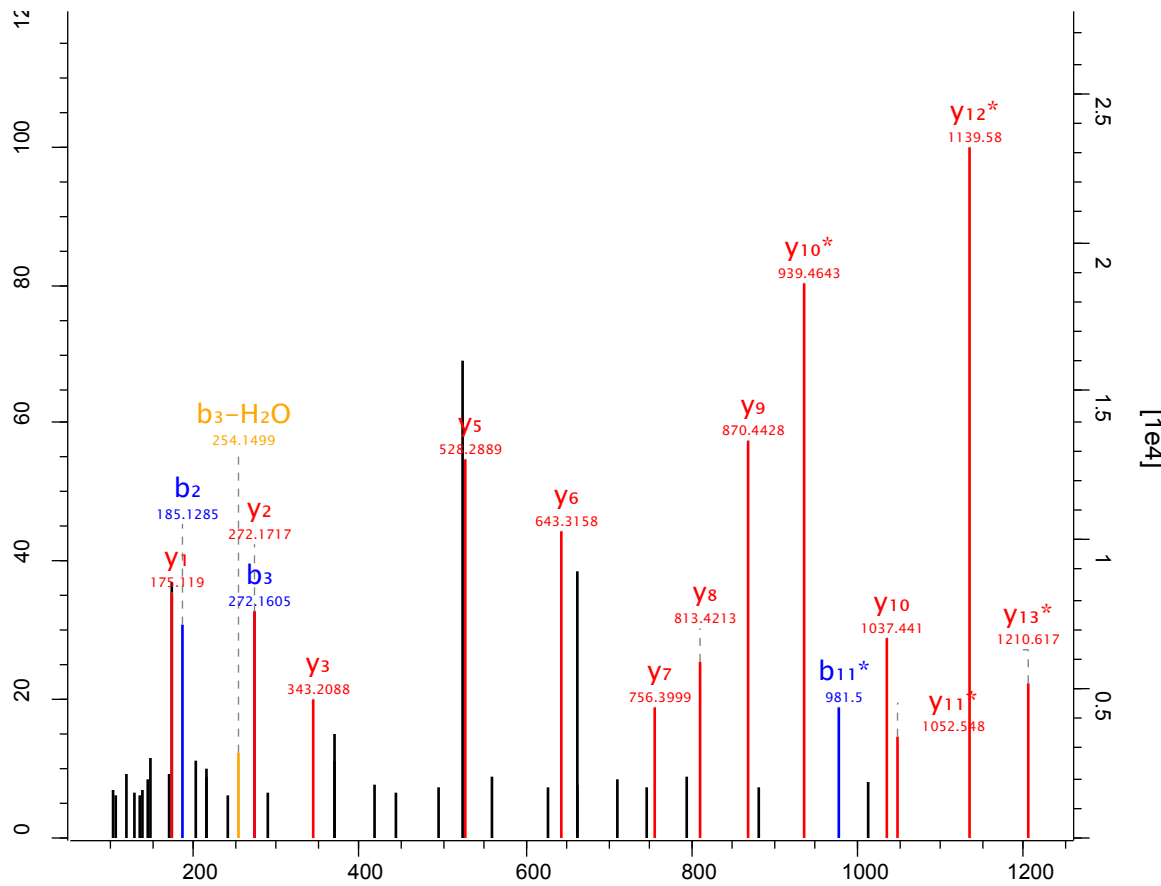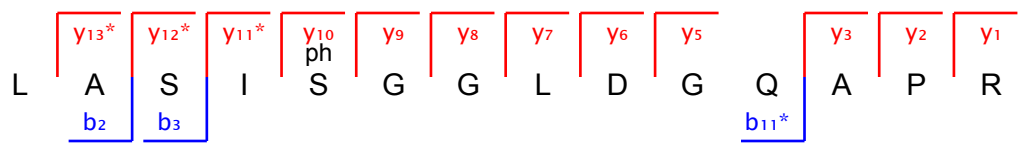

| Raw file         | Scan  | Method    | Score | m/z    |
|------------------|-------|-----------|-------|--------|
| 2013_COL15_38_45 | 17132 | FTMS; HCD | 44.24 | 690.94 |

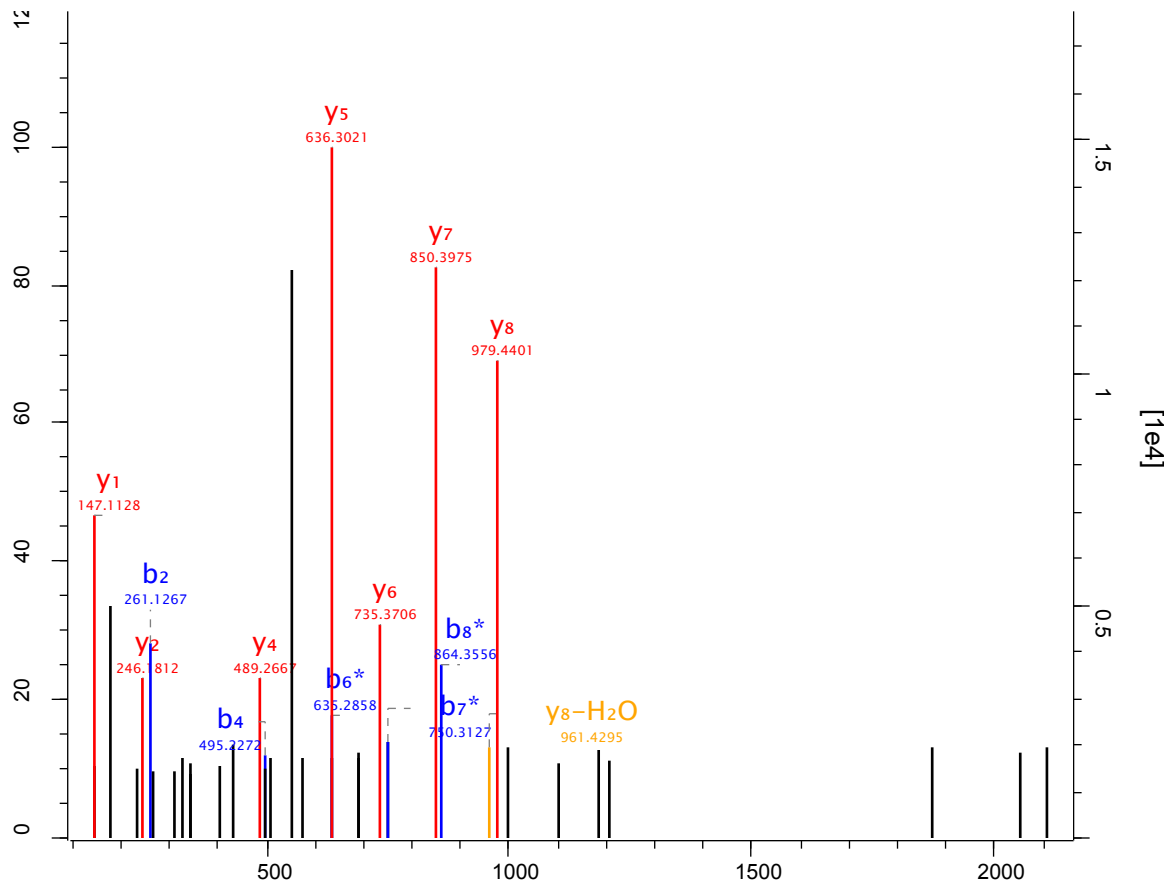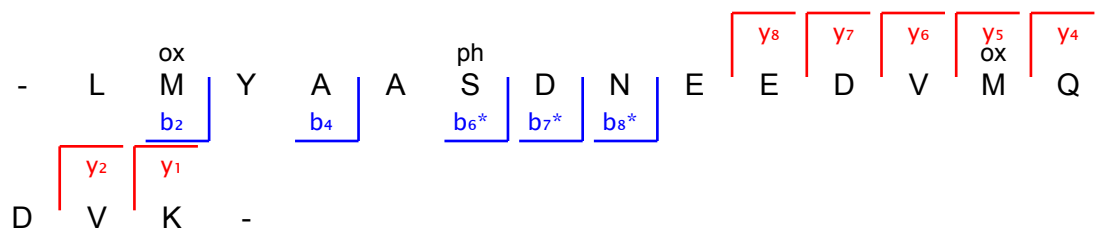

Raw file 2013\_COL15\_38\_45 Scan 17208 Method FTMS; HCD Score 170.14 m/z 1007.44

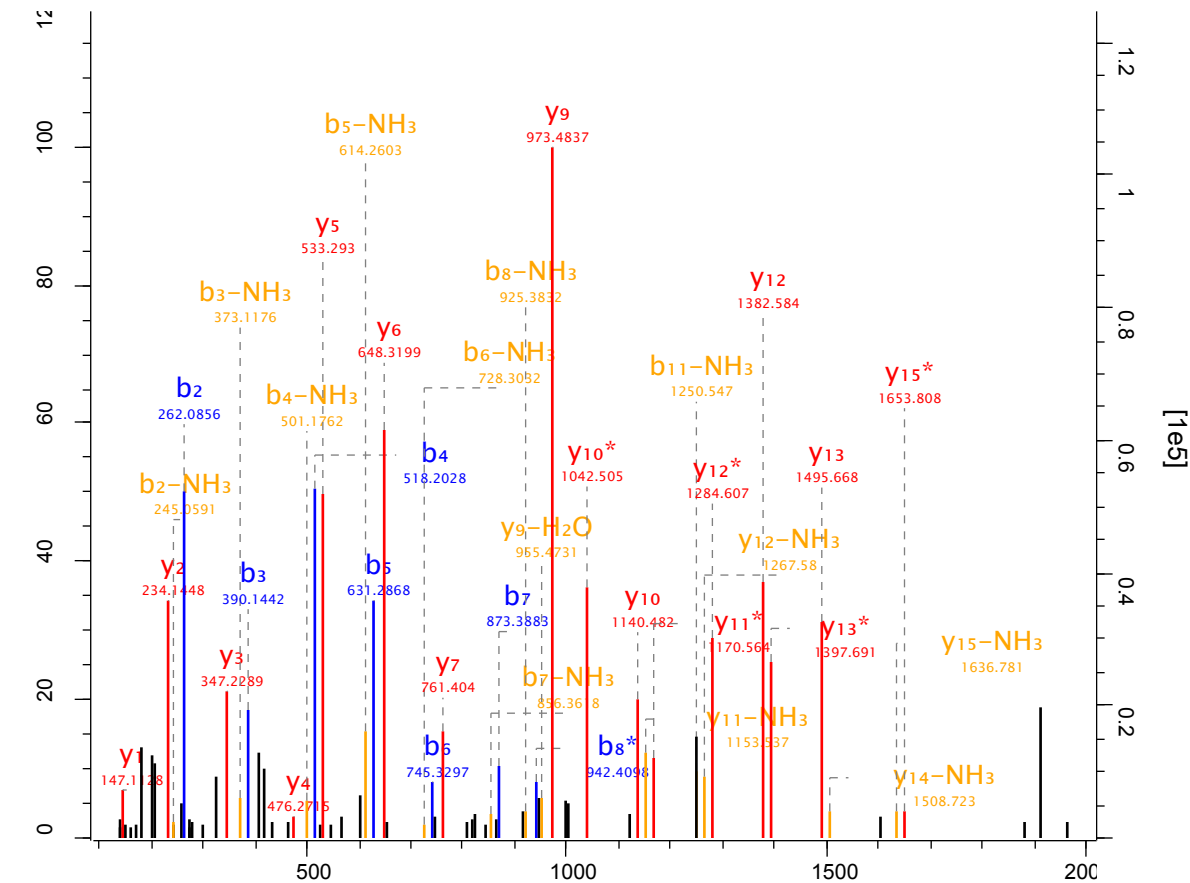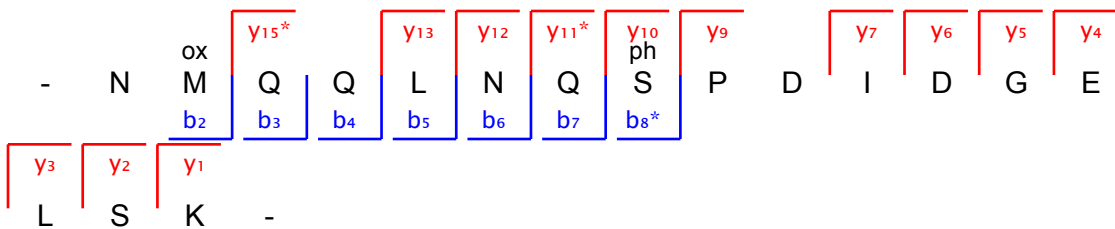

Raw file 2013\_COL15\_38\_45 Scan 1726 Method FTMS; HCD Score 79.09 m/z 426.52

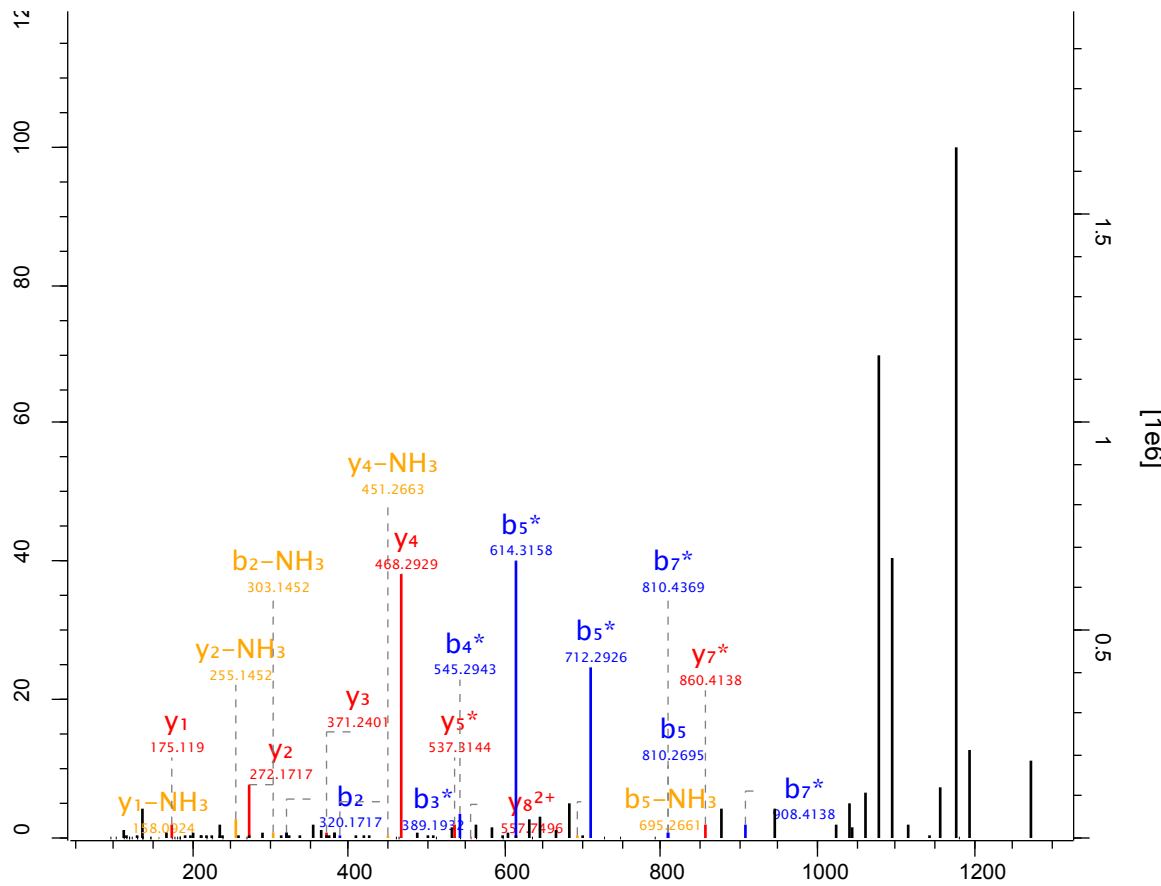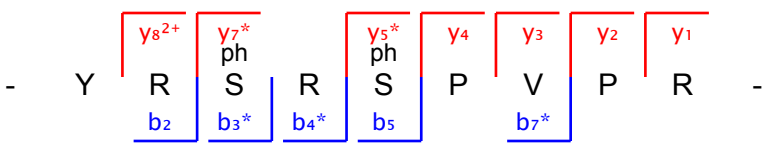



Raw file Scan Method Score m/z  
 2013\_COL15\_38\_45 17284 FTMS; HCD 42.32 706.83

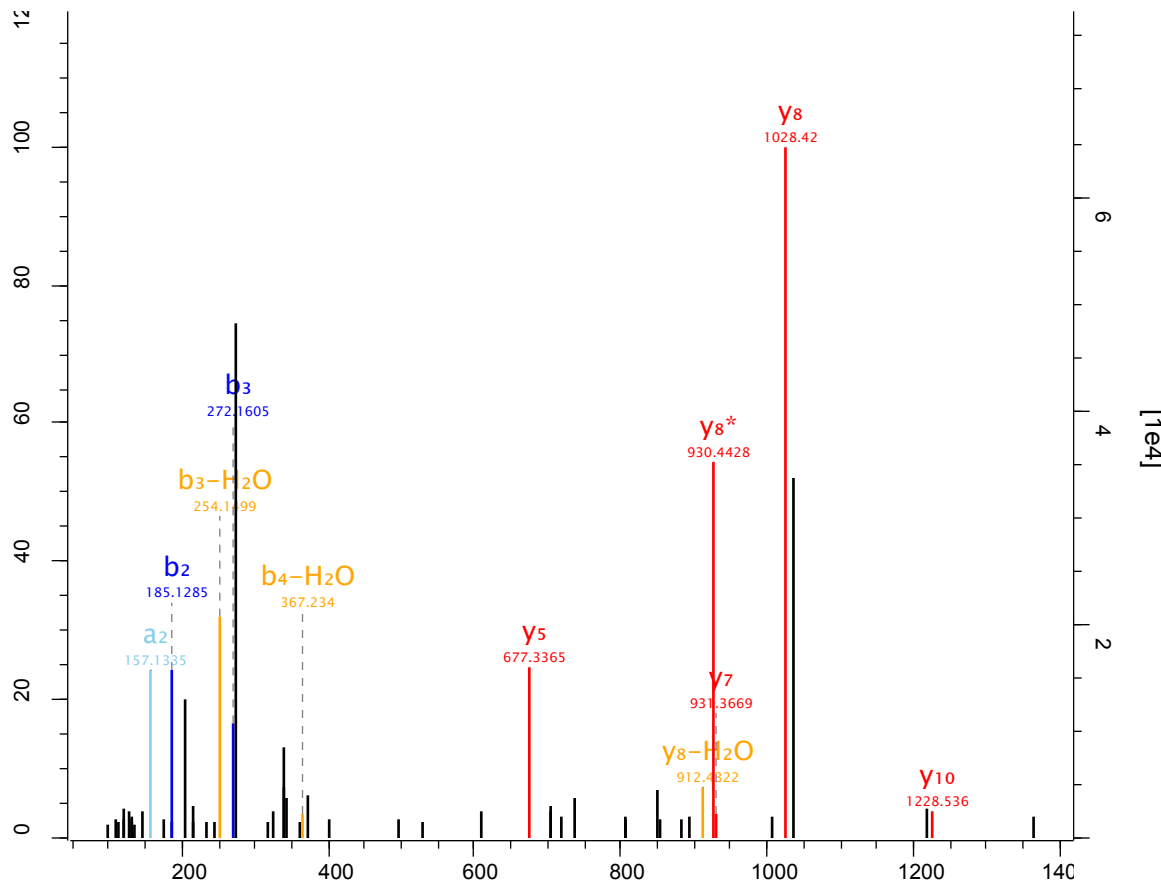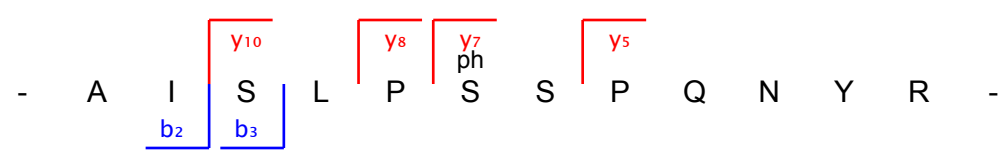

Raw file 2013\_COL15\_38\_45 Scan 17313 Method FTMS; HCD Score 55.69 m/z 743.33

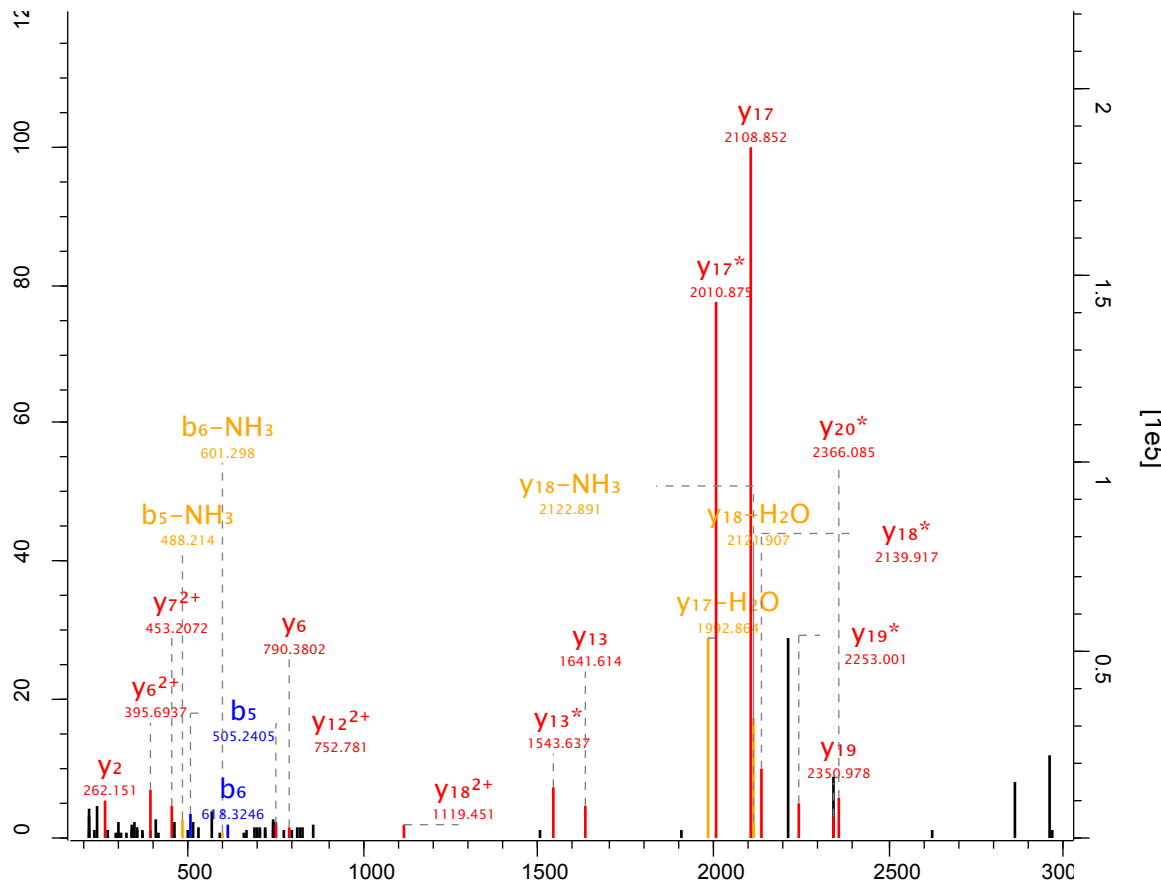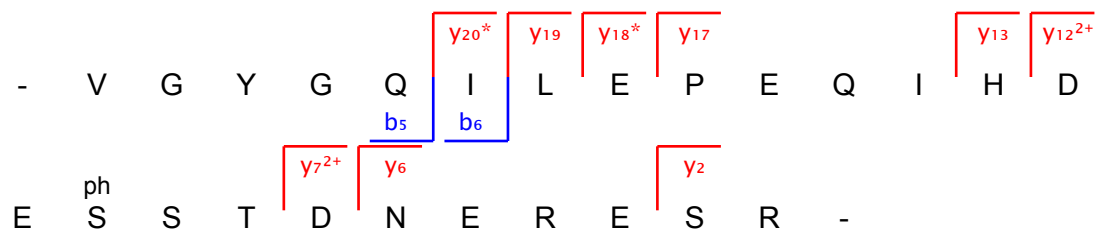



Raw file Scan Method Score m/z  
 2013\_COL15\_38\_45 17701 FTMS; HCD 113.4 723.3

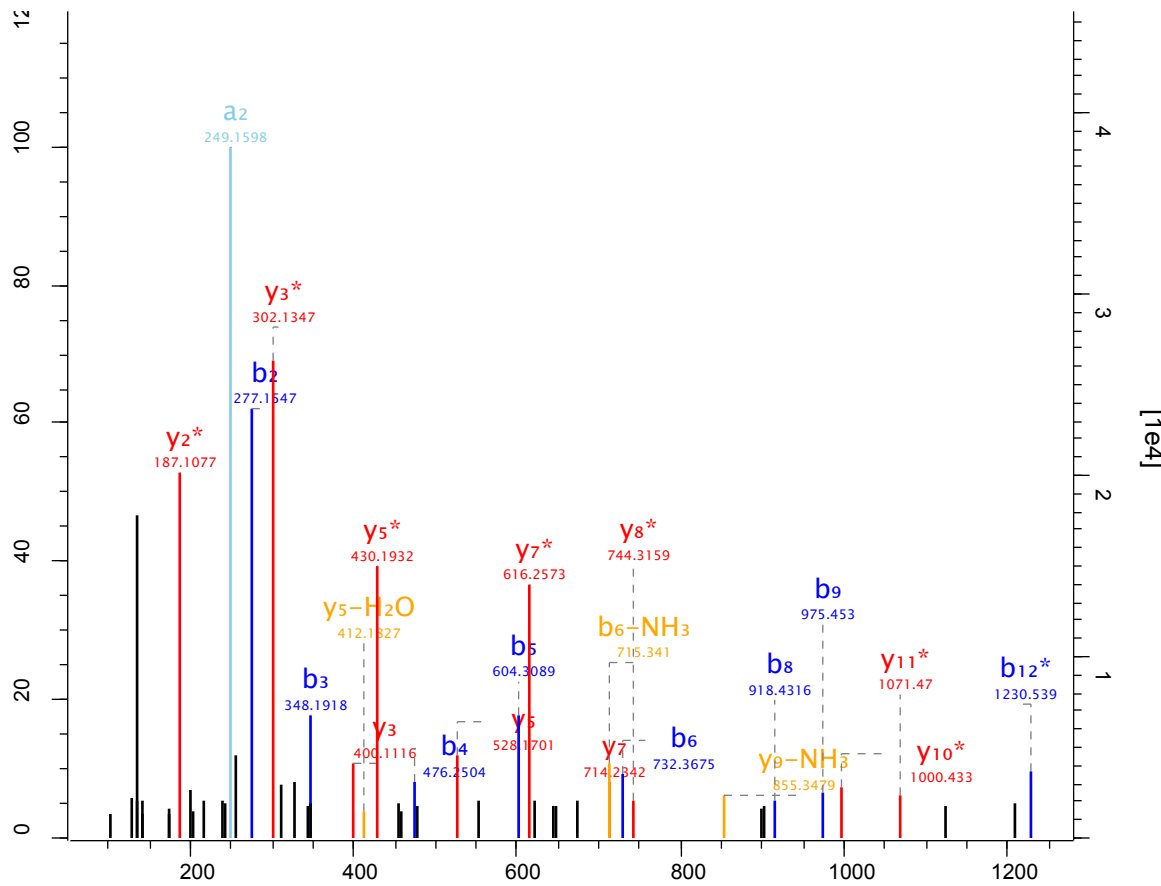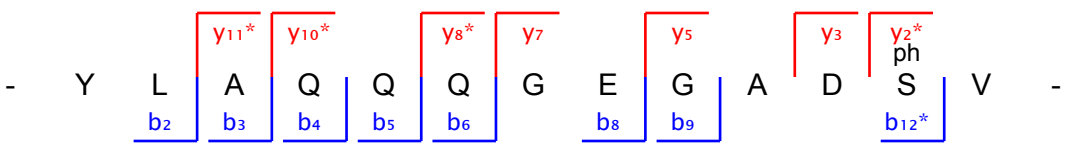

Raw file 2013\_COL15\_38\_45 Scan 18549 Method FTMS; HCD Score 209.25 m/z 622.77

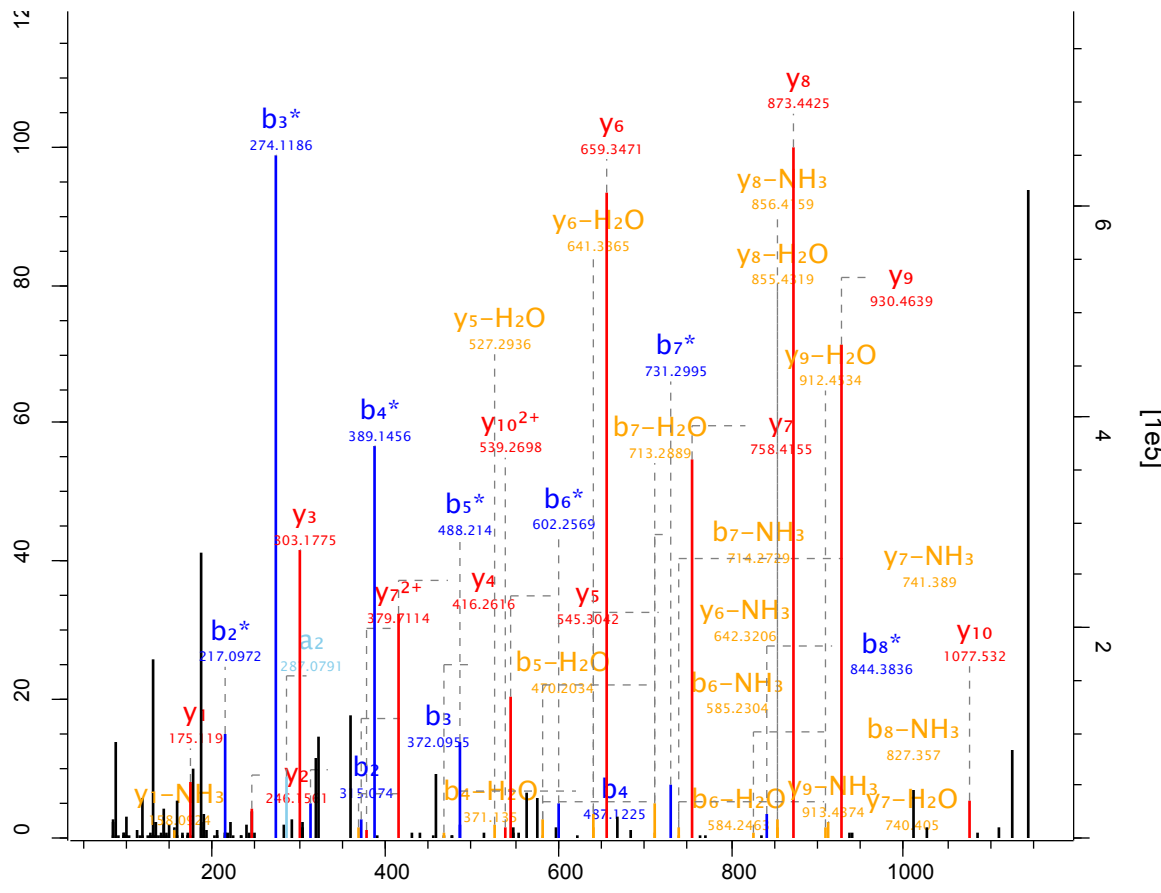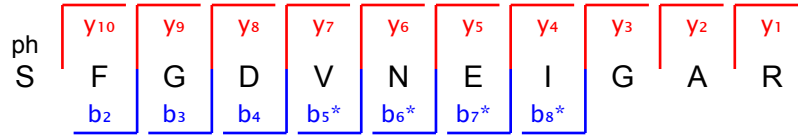

Raw file 2013\_COL15\_38\_45 Scan 18702 Method FTMS; HCD Score 205.65 m/z 885.33

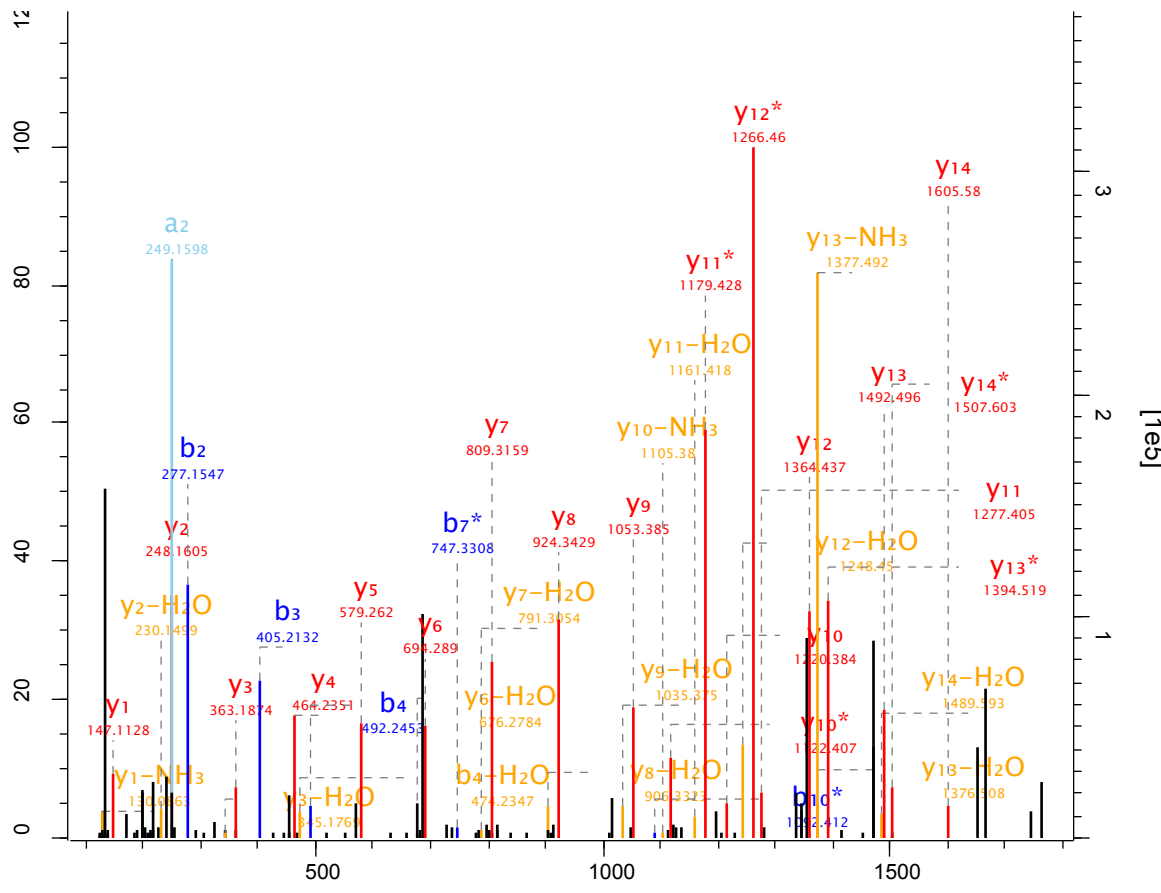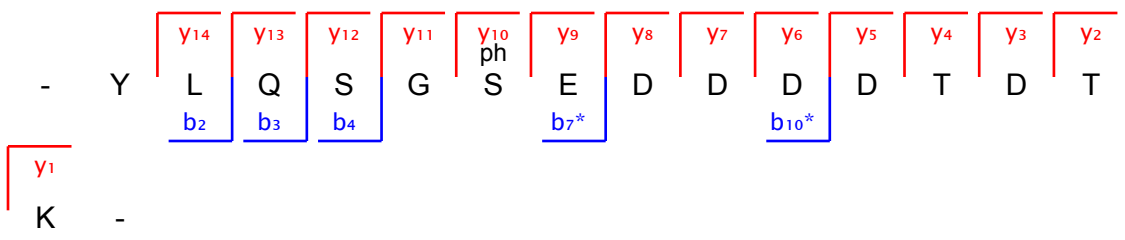

Raw file Scan Method Score m/z  
 2013\_COL15\_38\_45 18771 FTMS; HCD 66.38 907.71

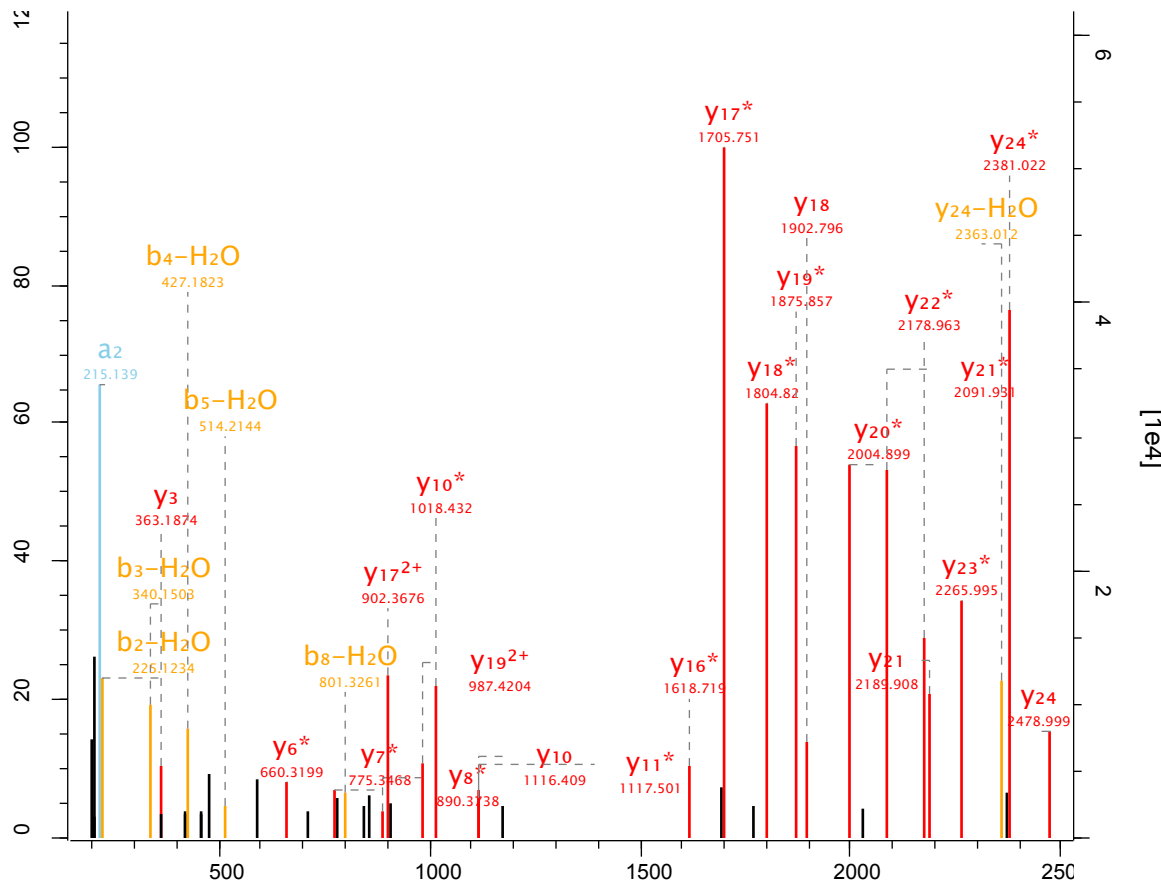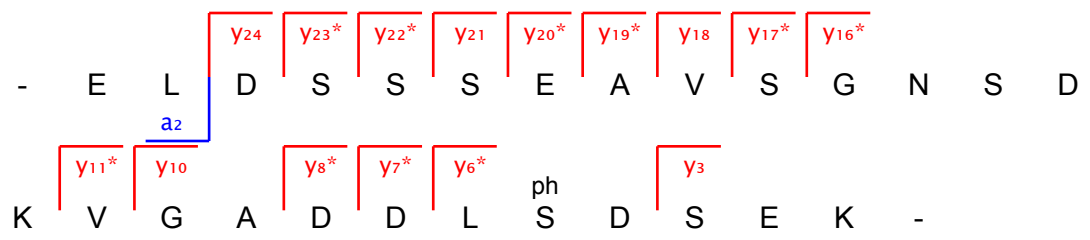

Raw file Scan Method Score m/z  
 2013\_COL15\_38\_45 18847 FTMS; HCD 91.62 633.28

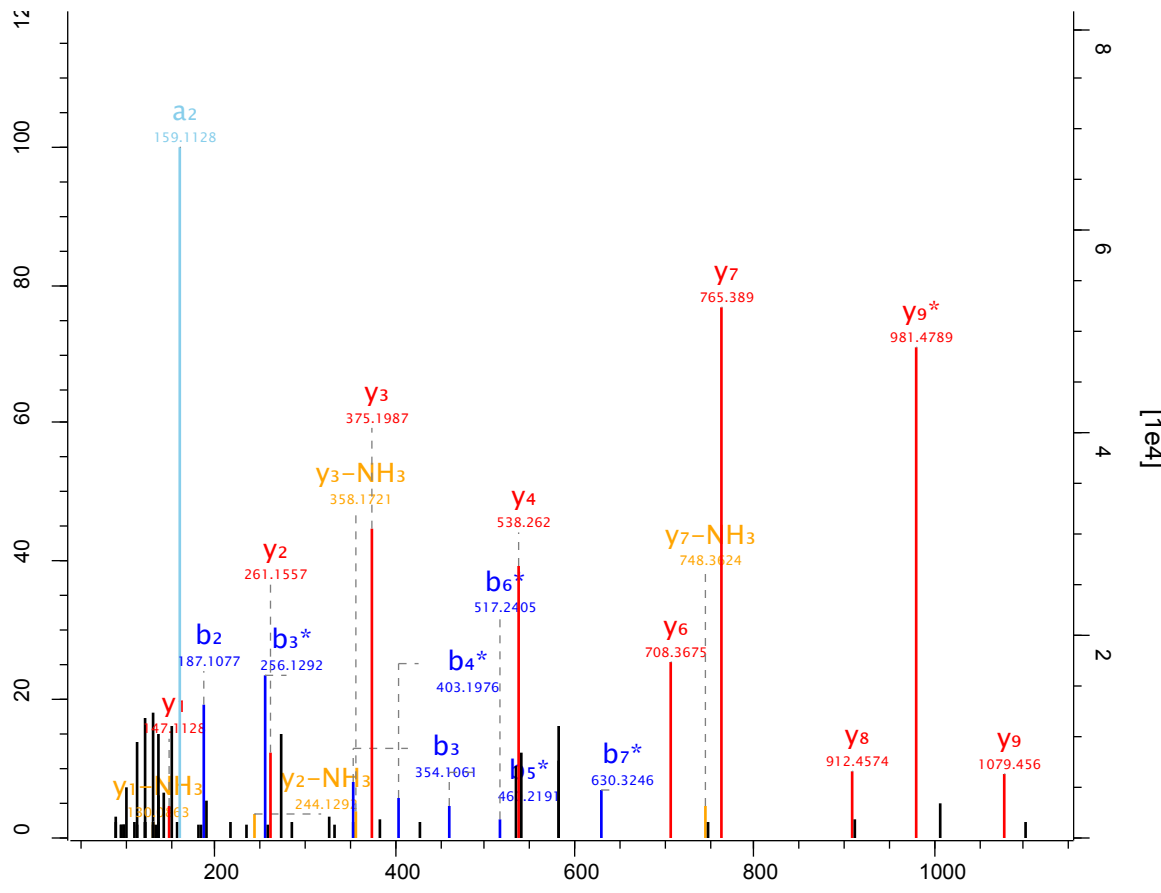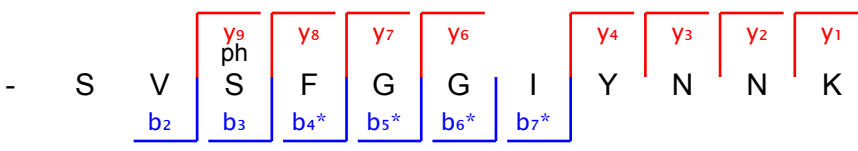

Raw file Scan Method Score m/z  
 2013\_COL15\_38\_45 19031 FTMS; HCD 91.77 798.02

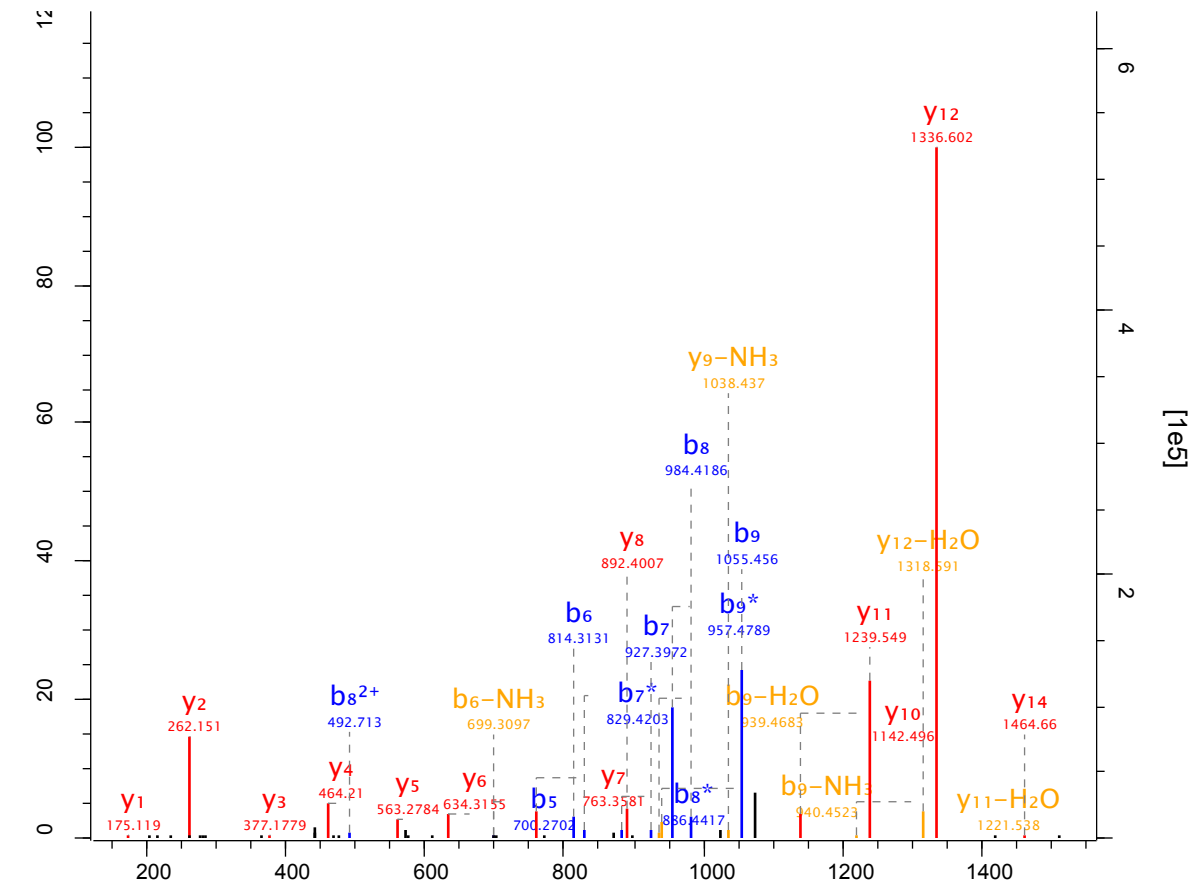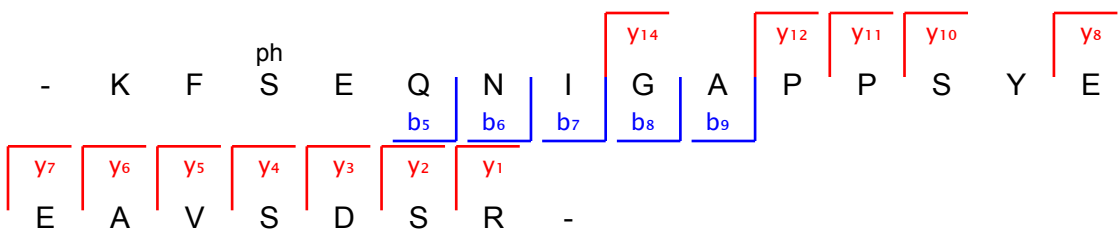

| Raw file         | Scan | Method    | Score | m/z    |
|------------------|------|-----------|-------|--------|
| 2013_COL15_38_45 | 1919 | FTMS; HCD | 63.18 | 586.74 |

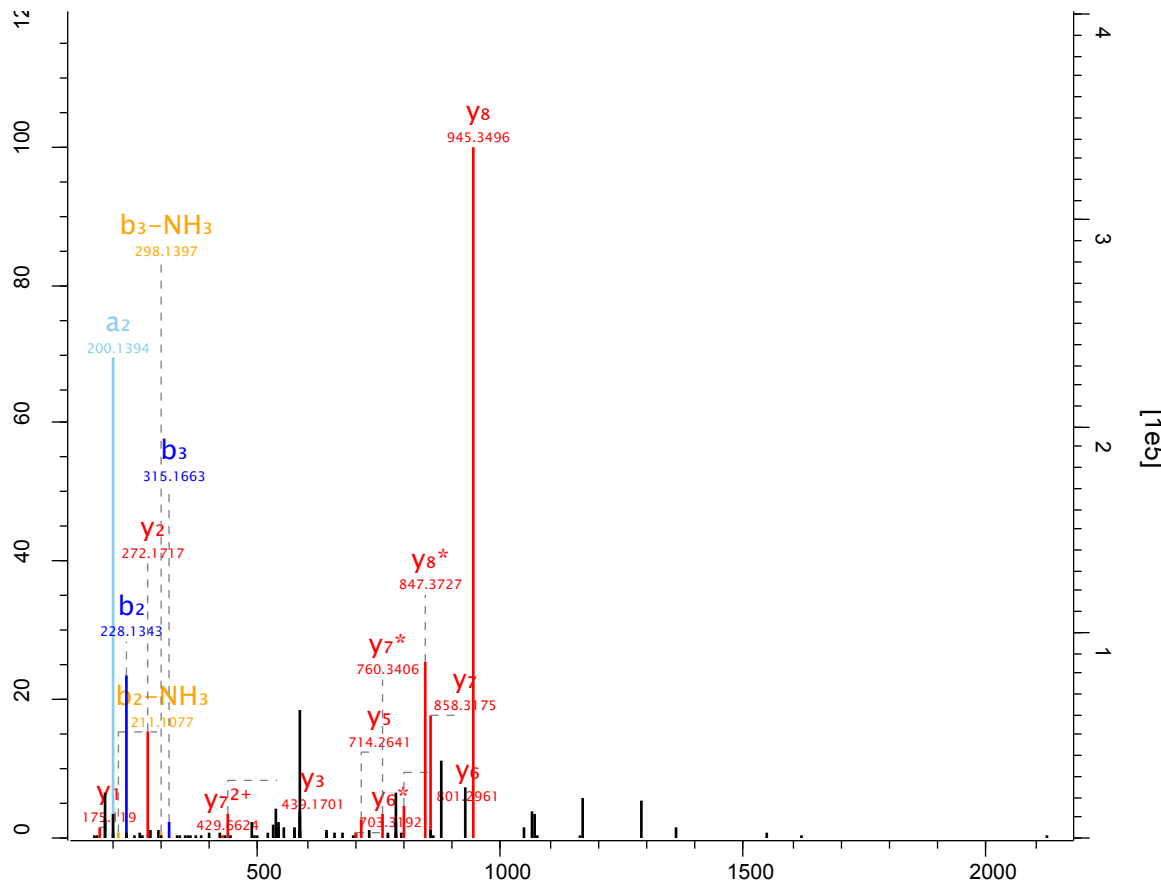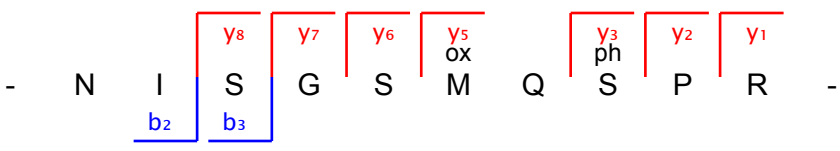

Raw file Scan Method Score m/z  
 2013\_COL15\_38\_45 19611 FTMS; HCD 92.77 698.83

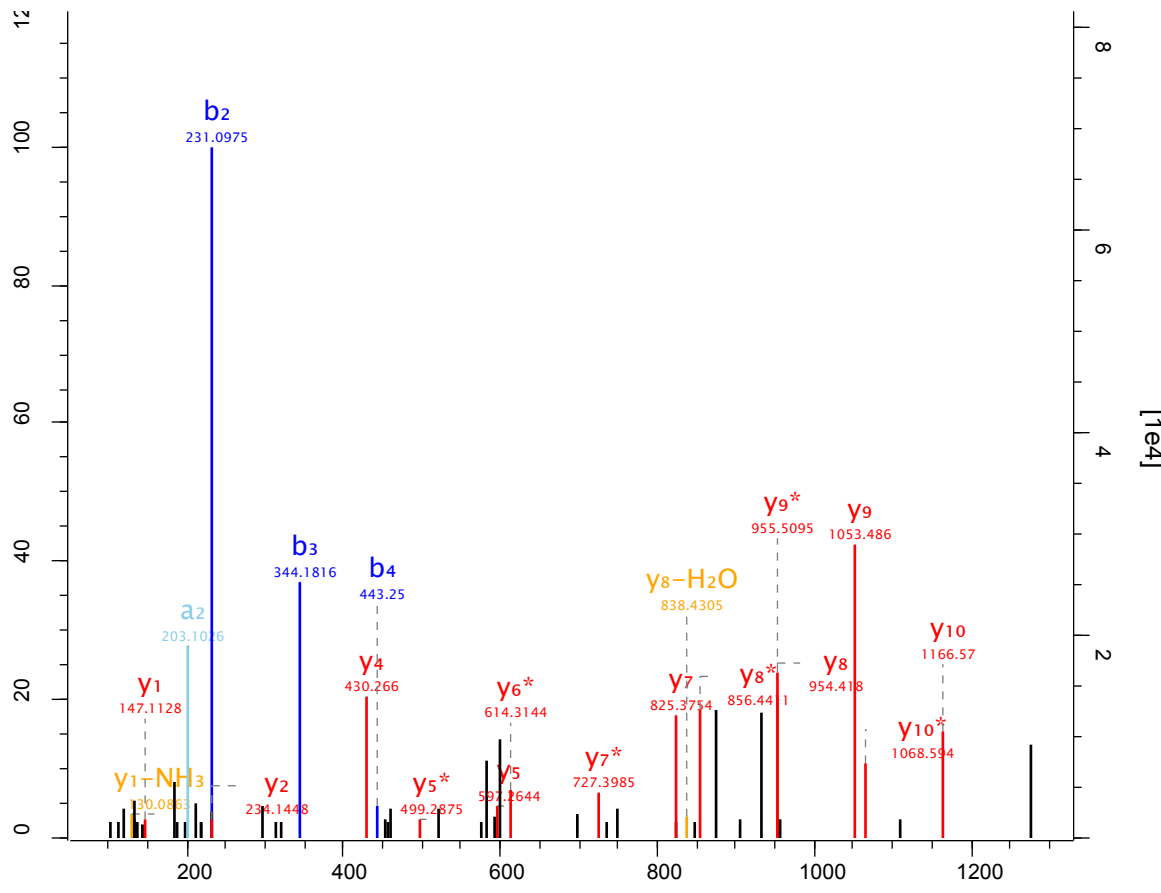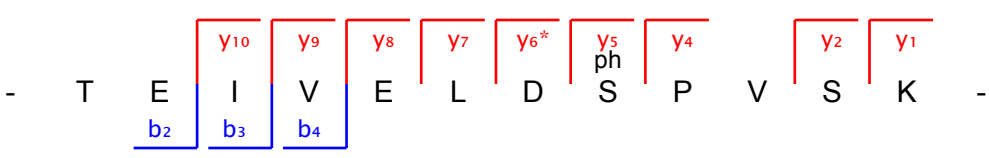



Raw file 2013\_COL15\_38\_45 Scan 20370 Method FTMS; HCD Score 72.32 m/z 721.3

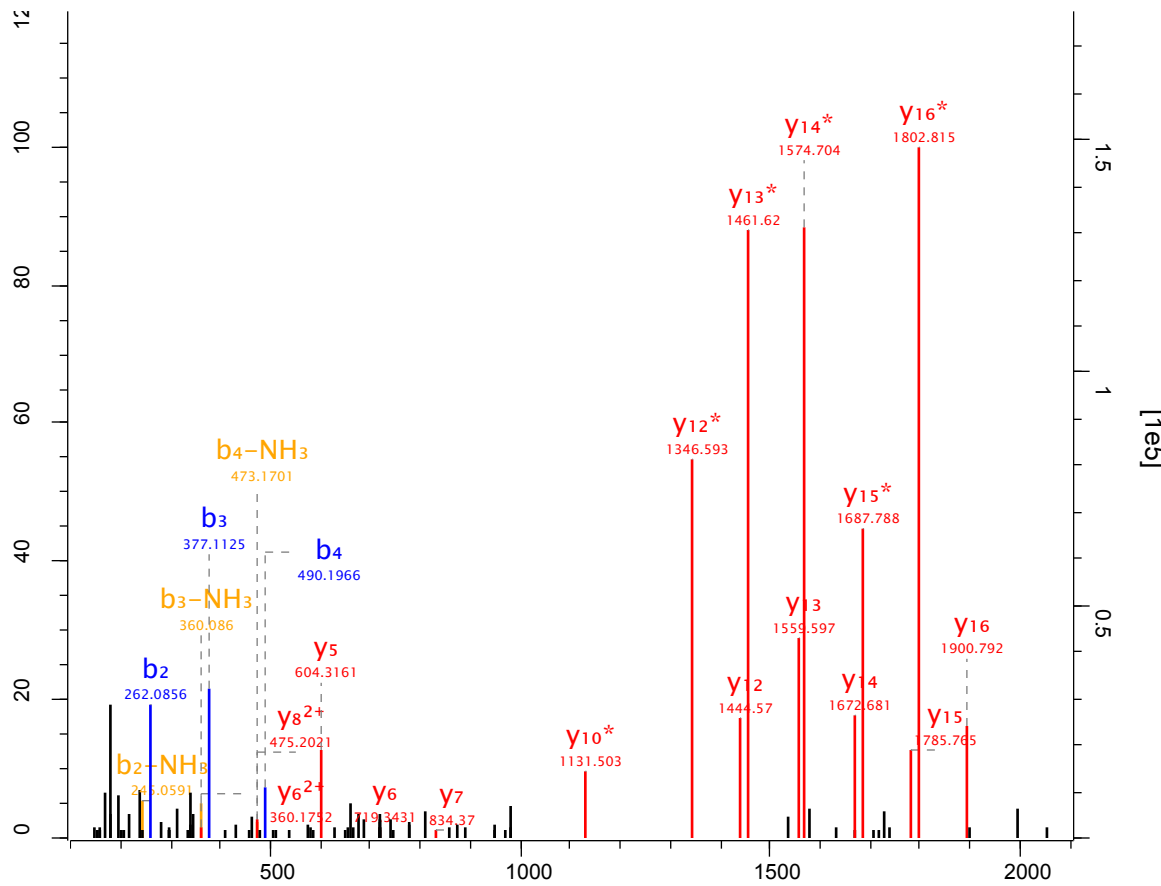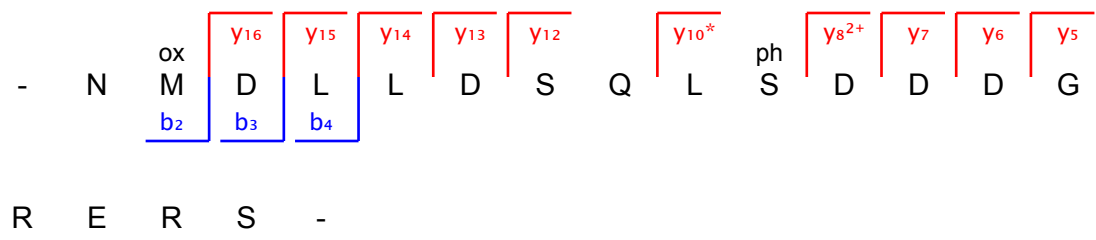

R E R S -

Raw file 2013\_COL15\_38\_45 Scan 20452 Method FTMS; HCD Score 67.88 m/z 896.39

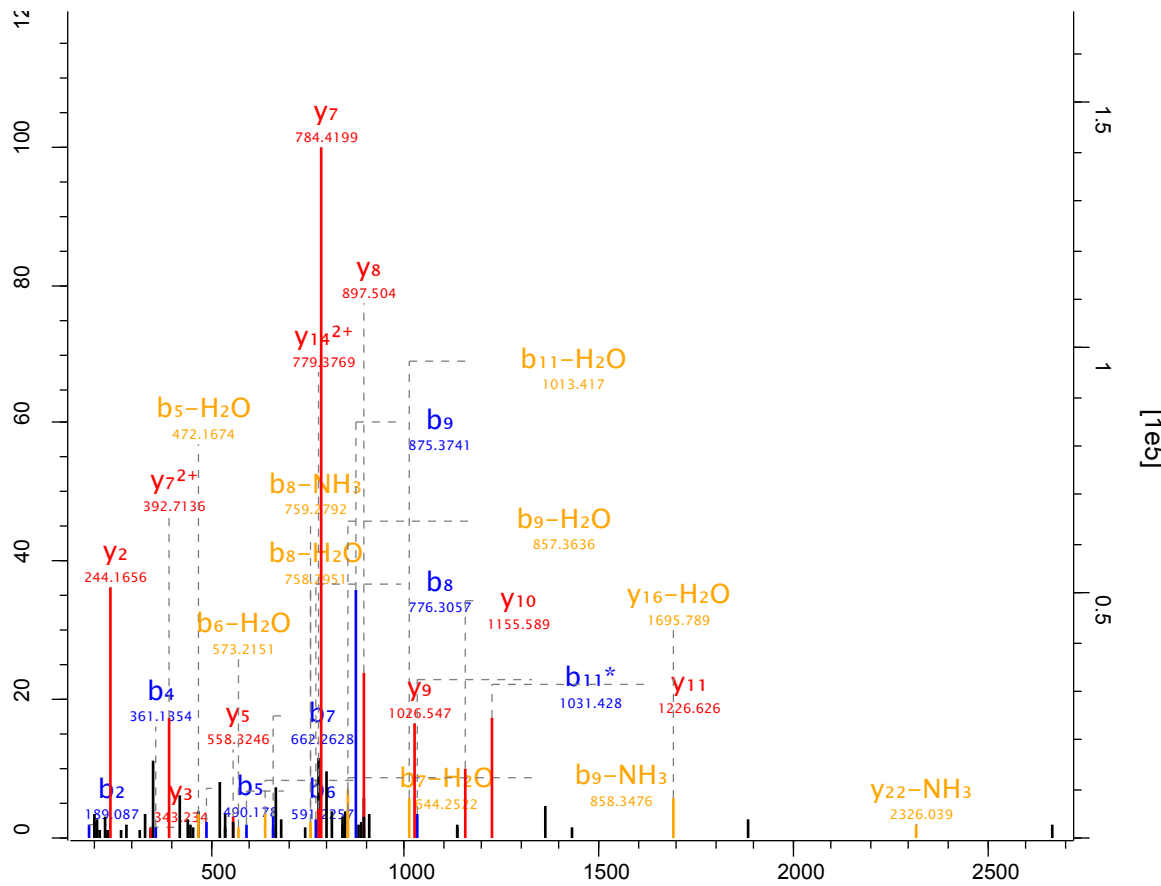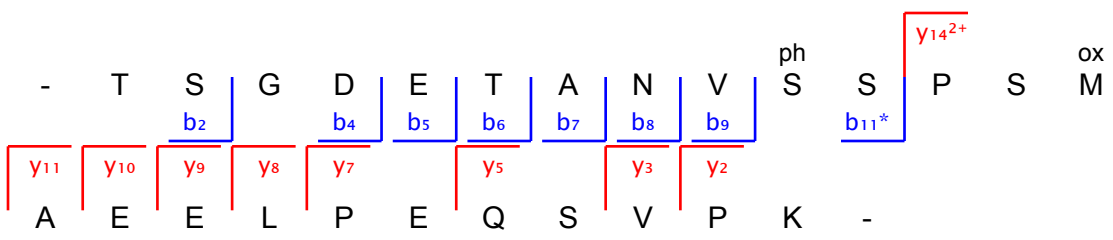

Raw file 80 Scan 20578 Method FTMS; HCD Score 69.98 m/z 623.98

2013\_COL15\_38\_45

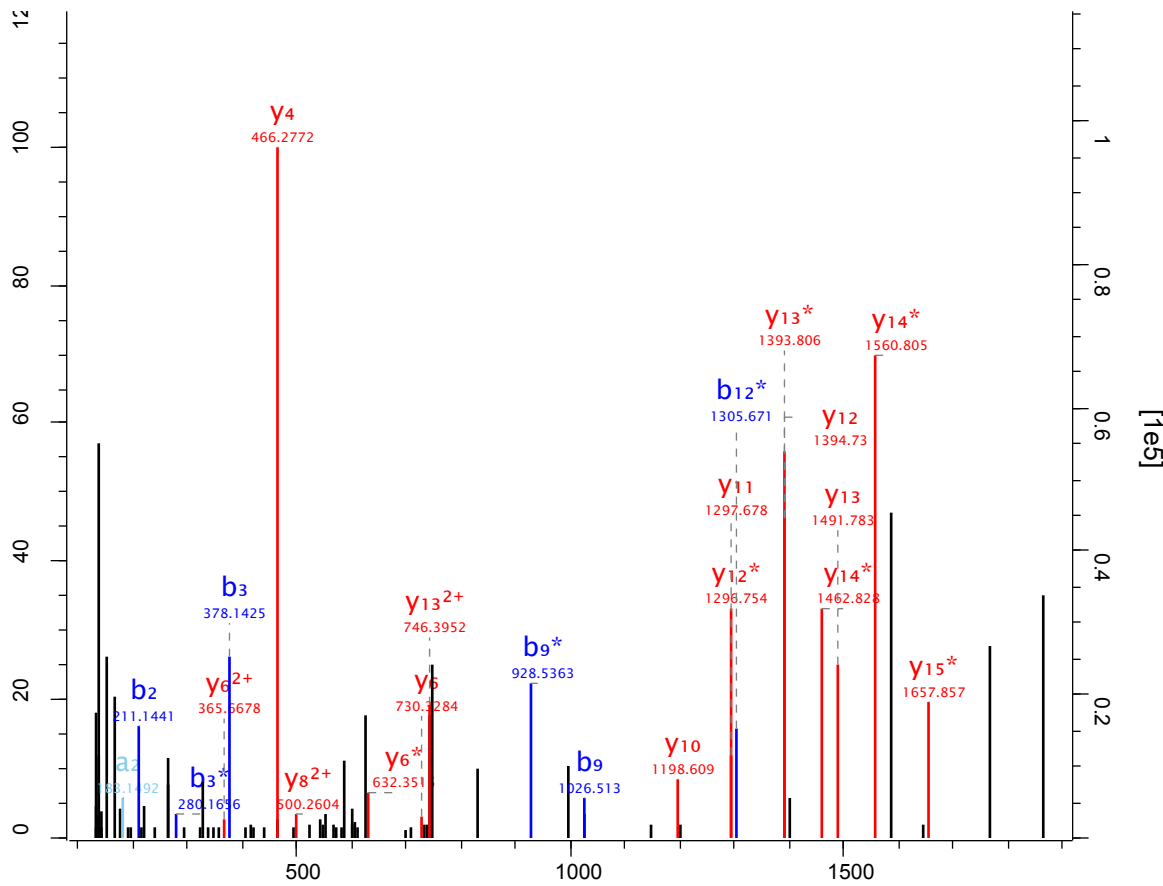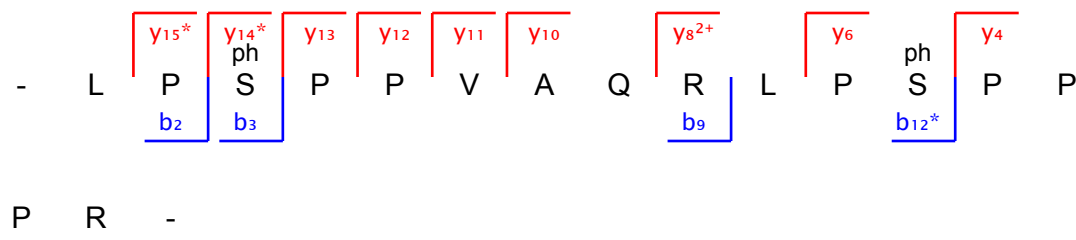

P R -

Raw file 2013\_COL15\_38\_45 Scan 20787 Method FTMS; HCD Score 67.14 m/z 724.86

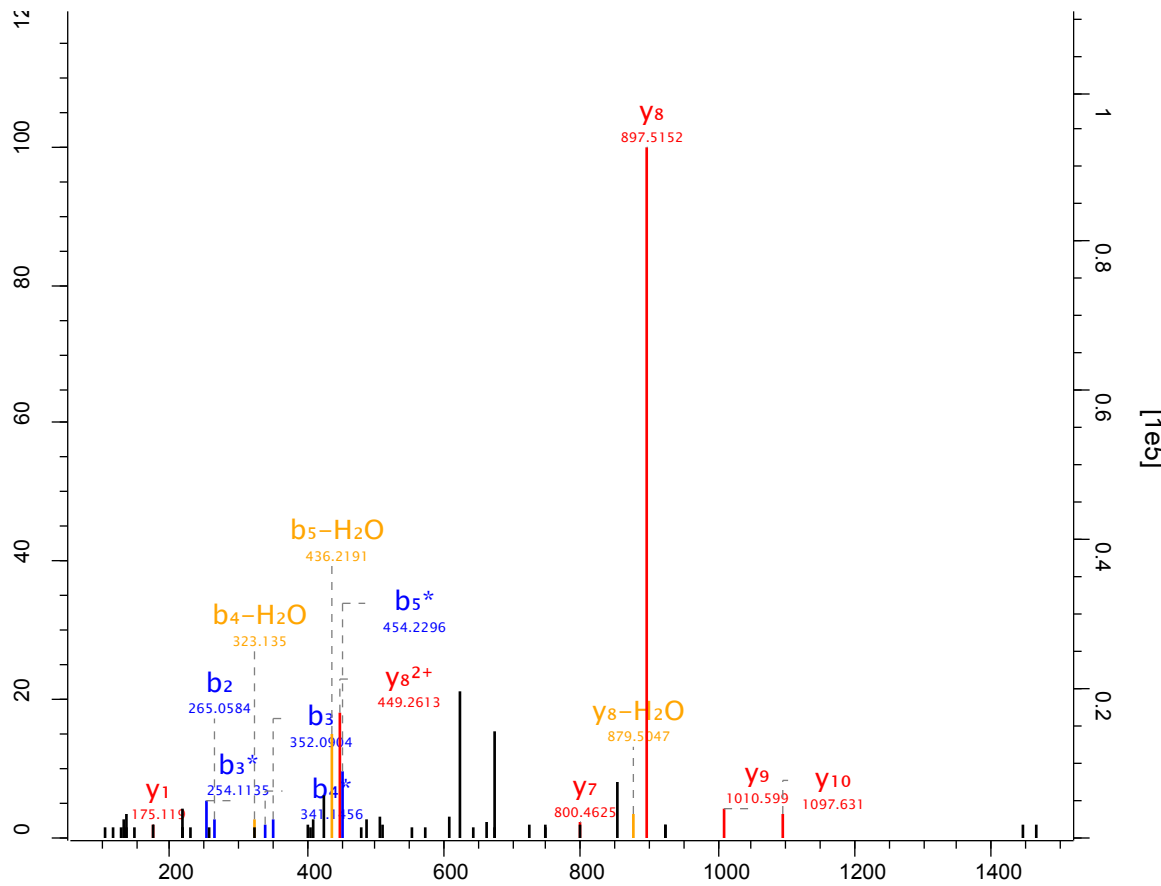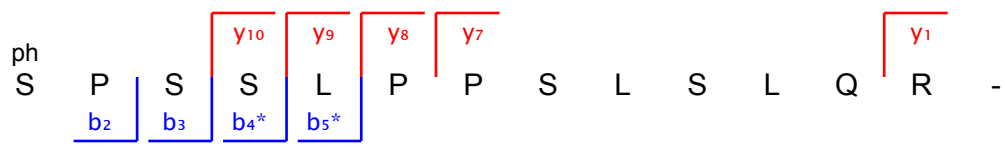

Raw file Scan Method Score m/z  
 2013\_COL15\_38\_45 21945 FTMS; HCD 92.01 782.37

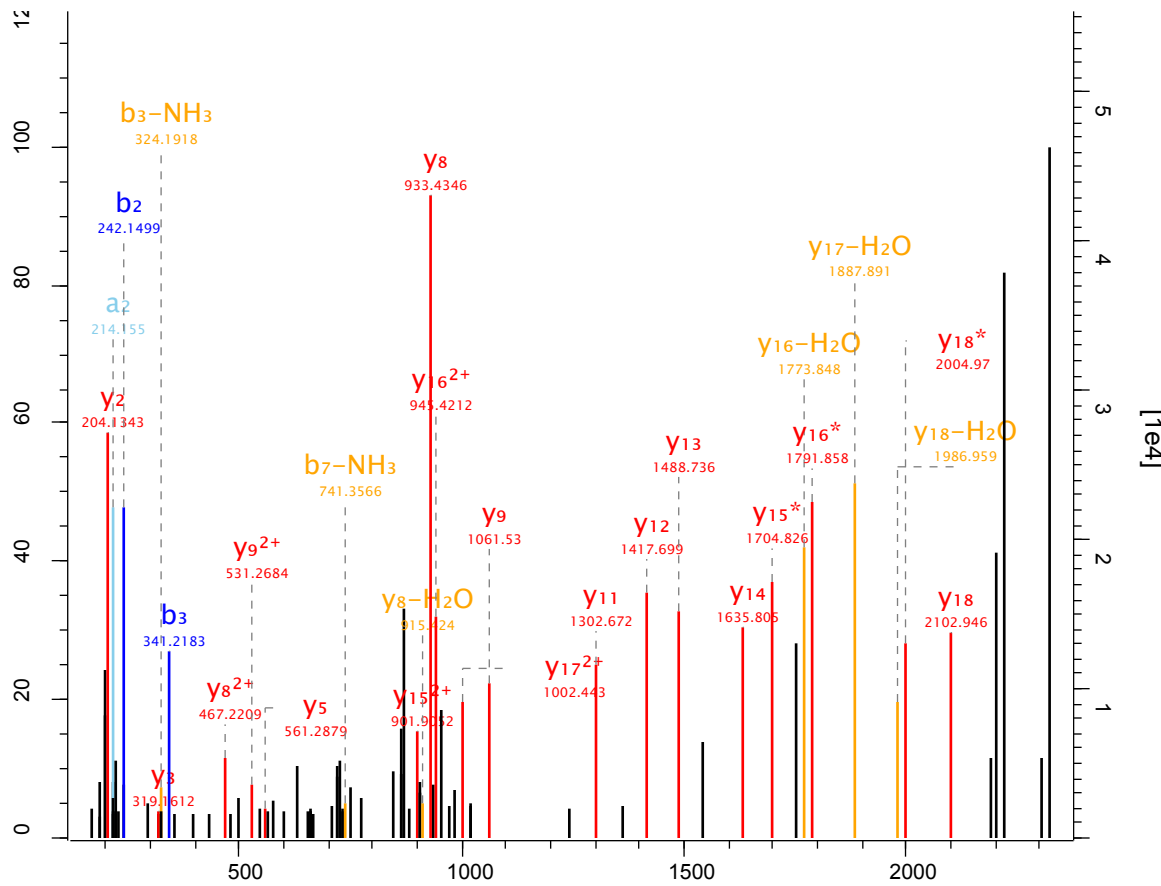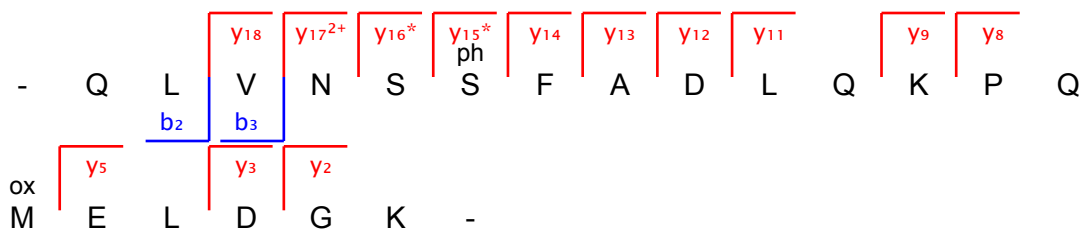

Raw file: 2013\_COL15\_38\_45  
 Scan: 22541  
 Method: FTMS; HCD  
 Score: 47.68  
 m/z: 697

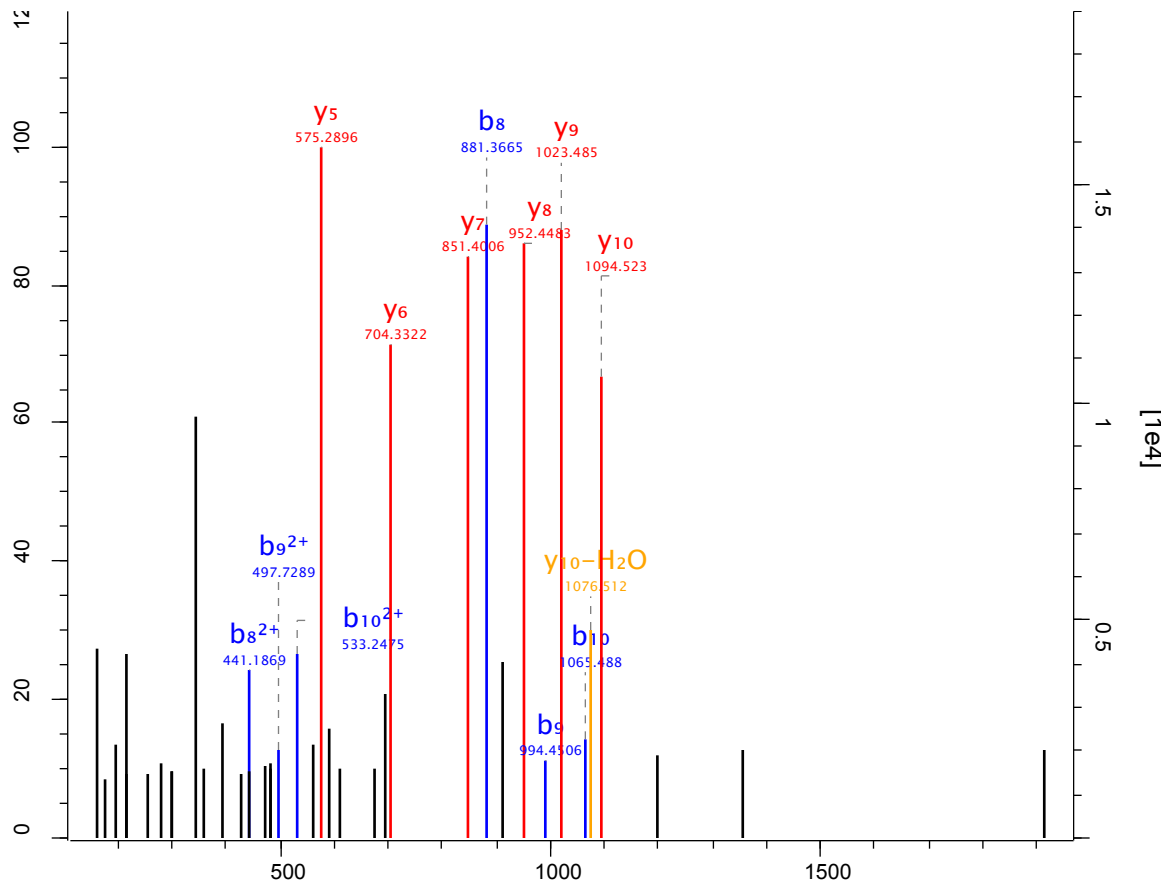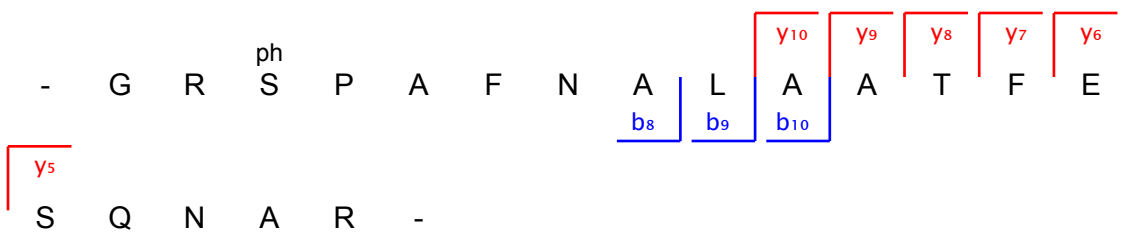

Raw file Scan Method Score m/z  
 2013\_COL15\_38\_45 23424 FTMS; HCD 56.82 755.33

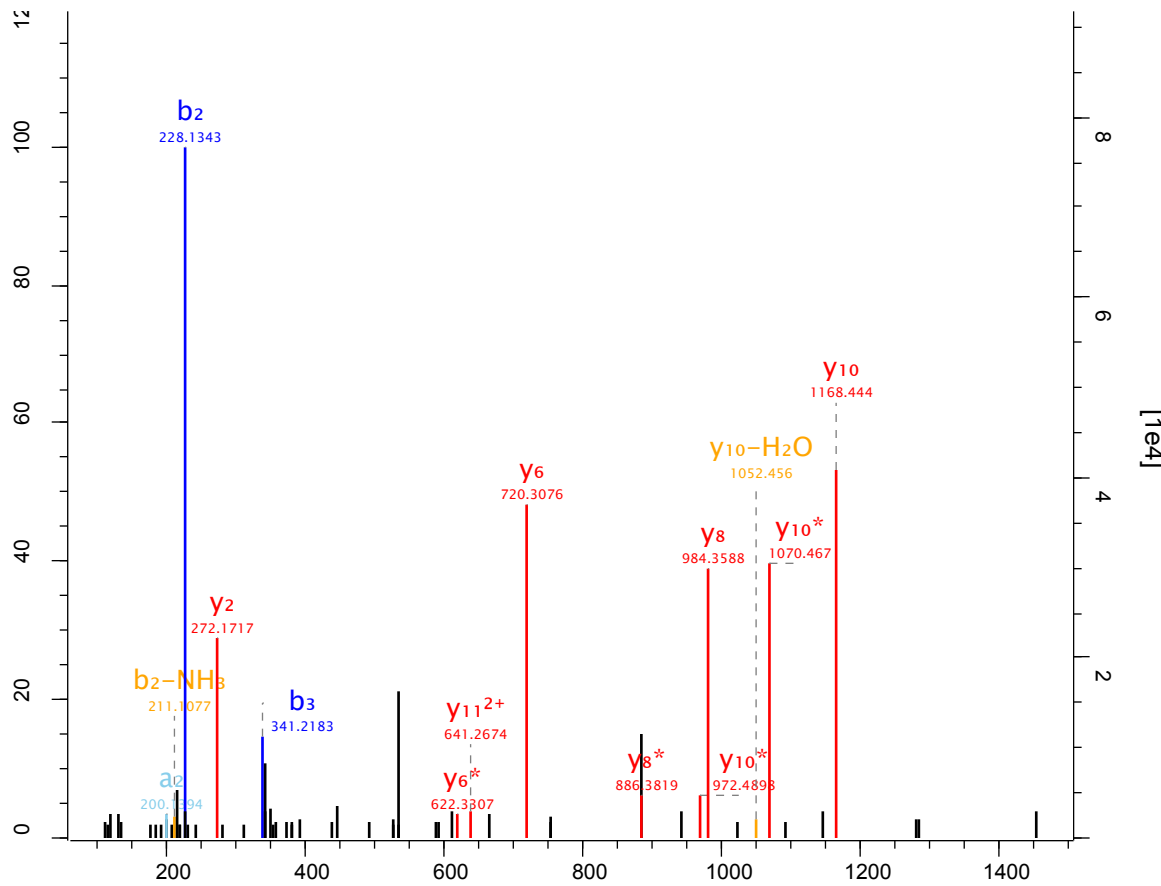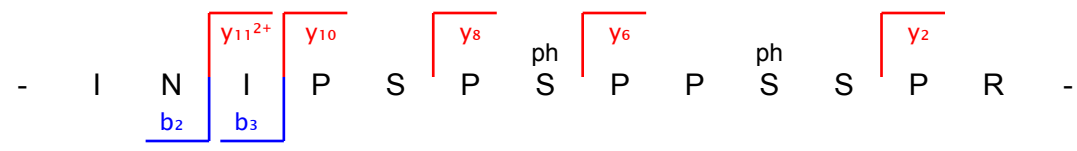

Raw file Scan Method Score m/z  
 2013\_COL15\_38\_45 23794 FTMS; HCD 99.5 665.78

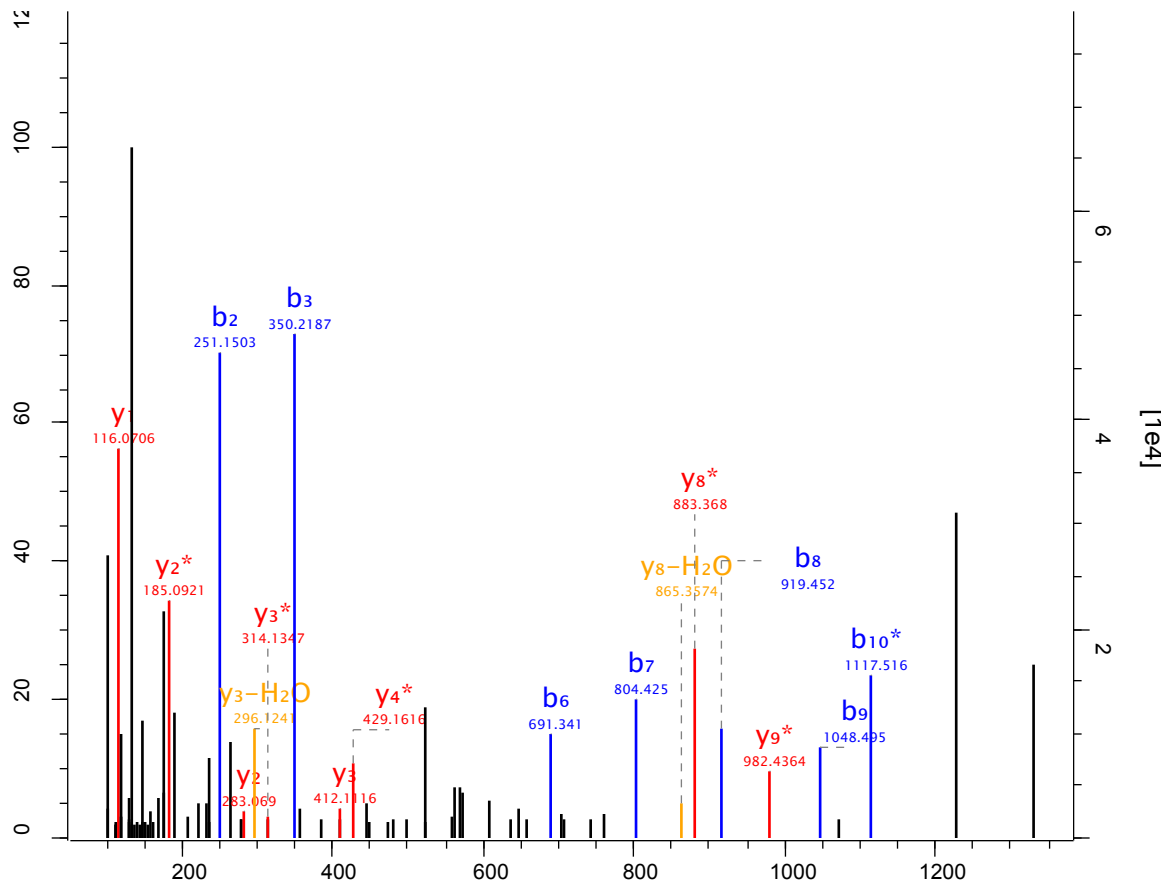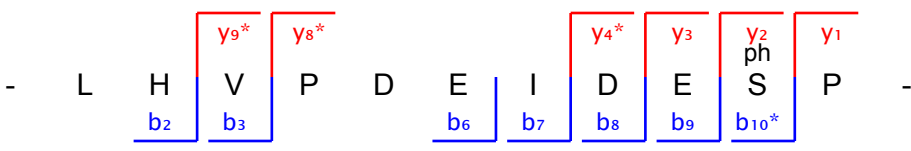



Raw file 2013\_COL15\_38\_45 Scan 24323 Method FTMS; HCD Score 143.25 m/z 634.76

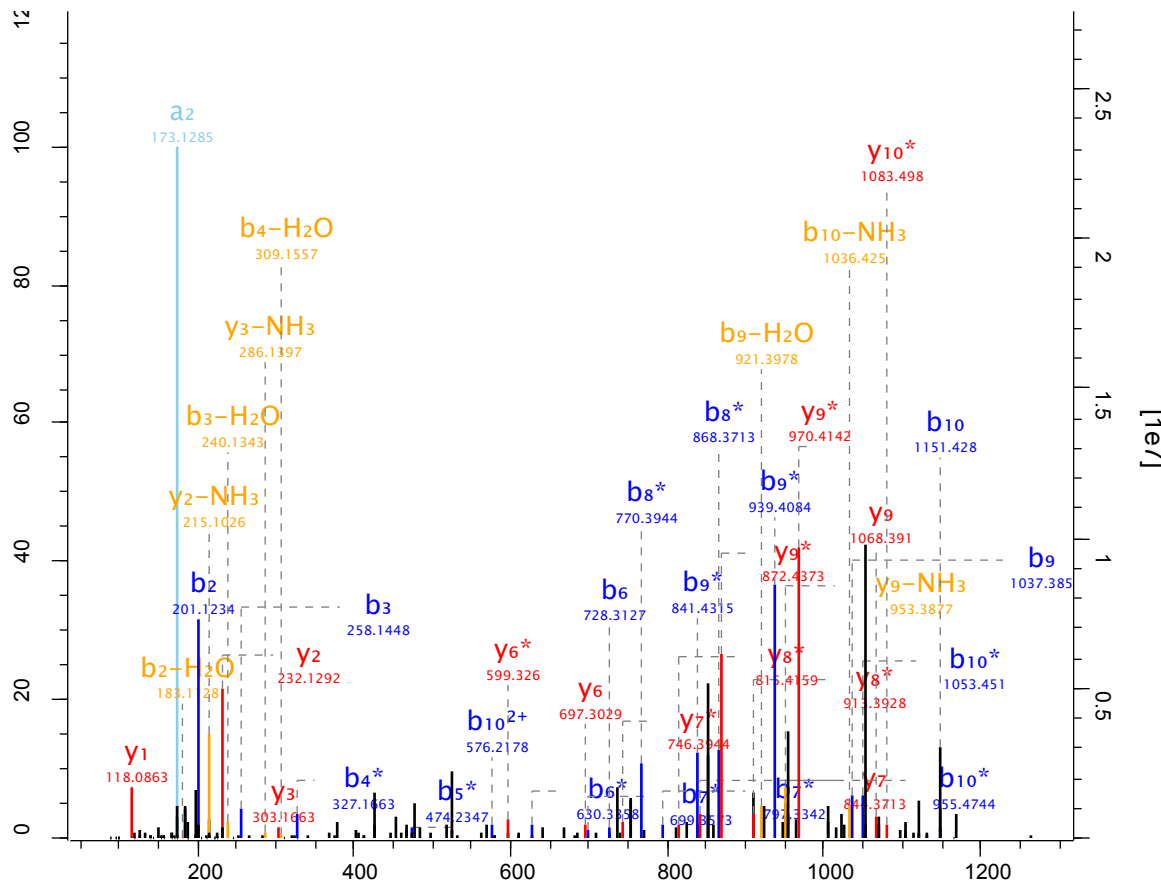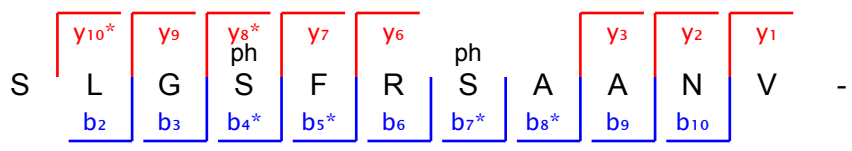

| Raw file         | Scan | Method    | Score | m/z    |
|------------------|------|-----------|-------|--------|
| 2013_COL15_38_45 | 2524 | FTMS; HCD | 97.27 | 644.27 |

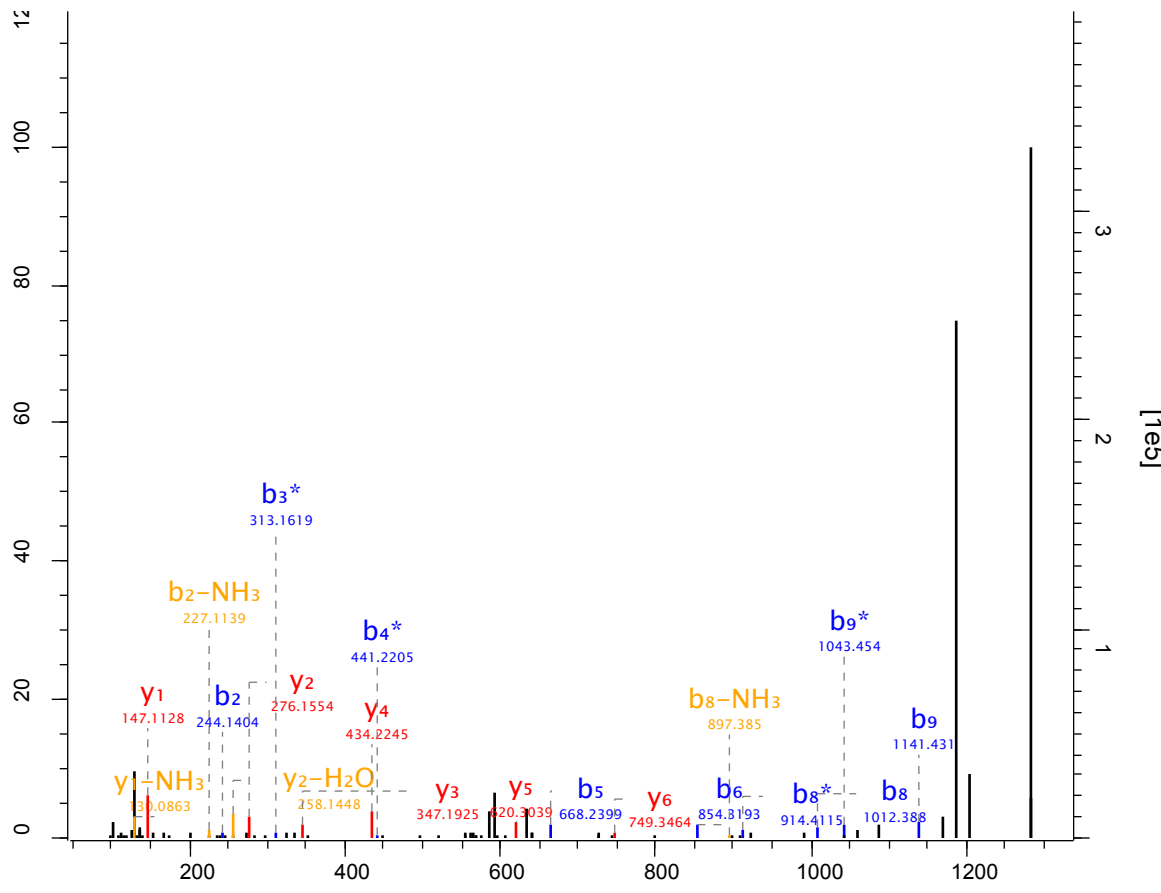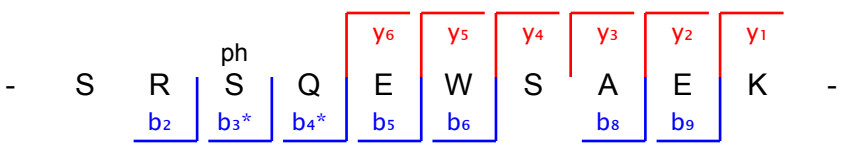

Raw file 2013\_COL15\_38\_45 Scan 26679 Method FTMS; HCD Score 167.51 m/z 969.89

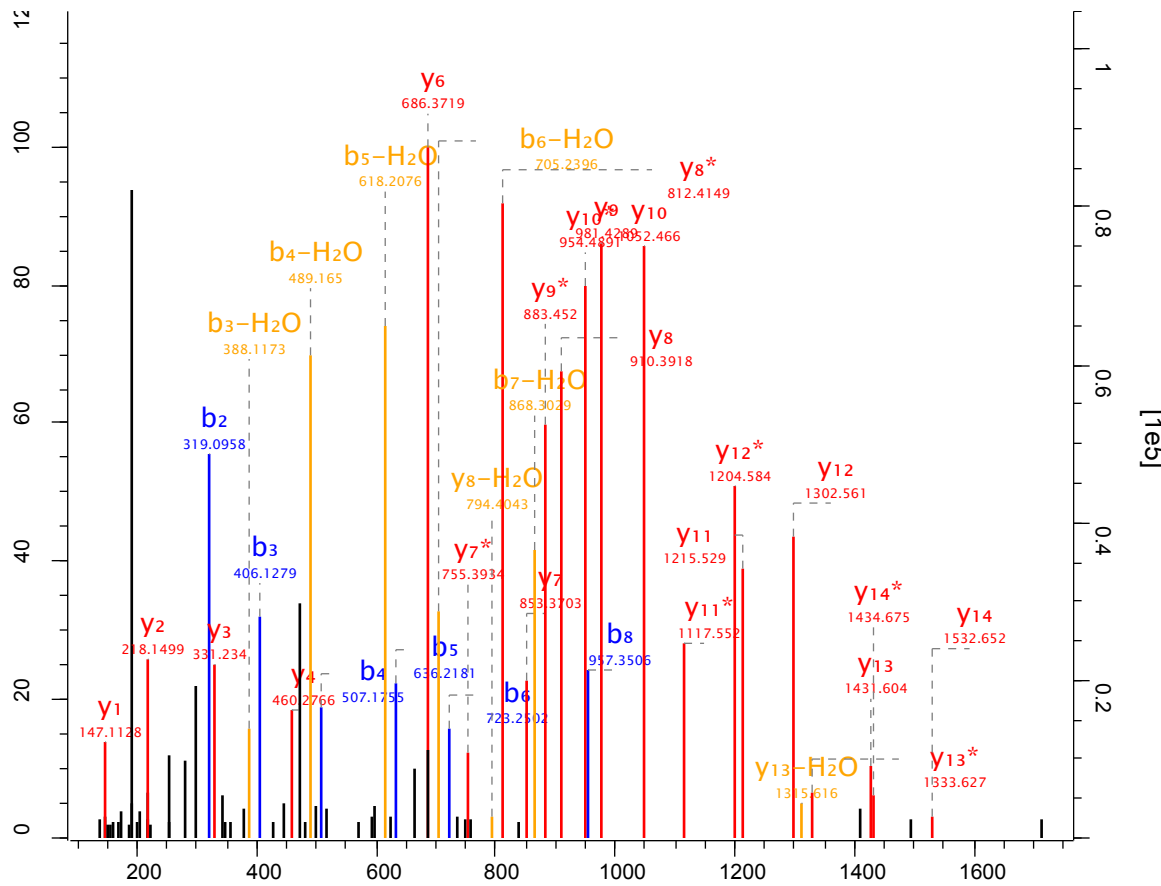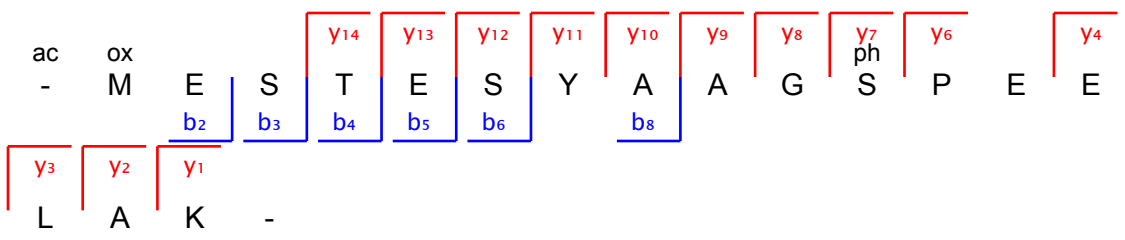

Raw file Scan Method Score m/z  
 2013\_COL15\_38\_45 26767 FTMS; HCD 43.35 869.35

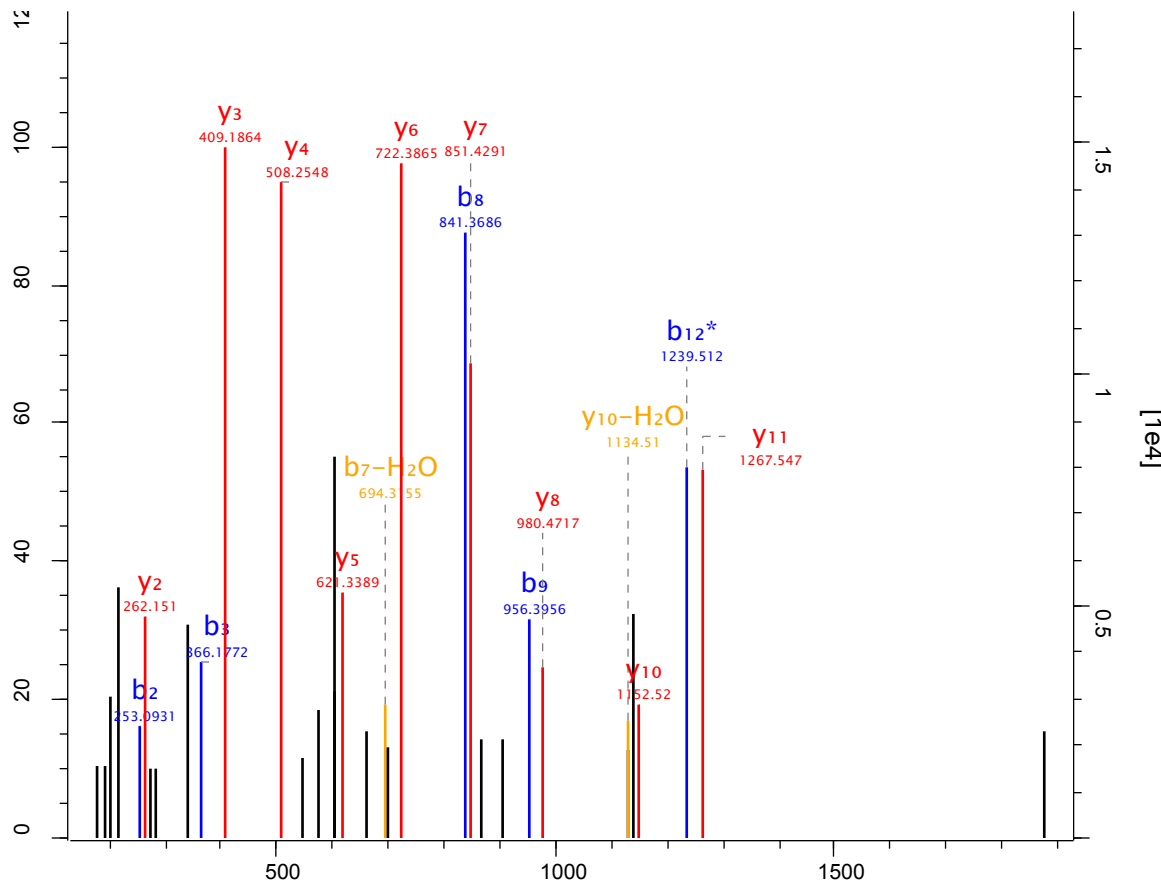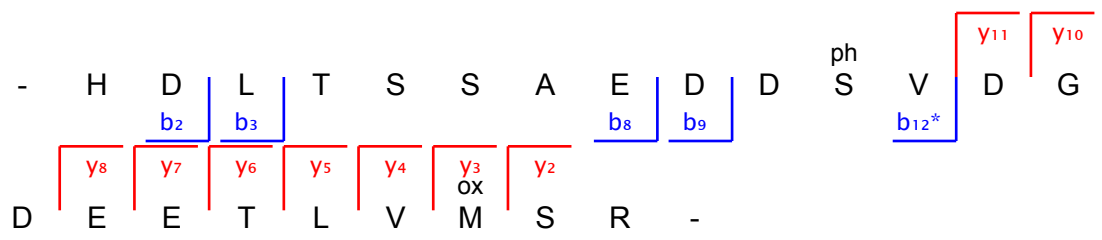

Raw file Scan Method Score m/z  
 2013\_COL15\_38\_45 27275 FTMS; HCD 51.77 653.28

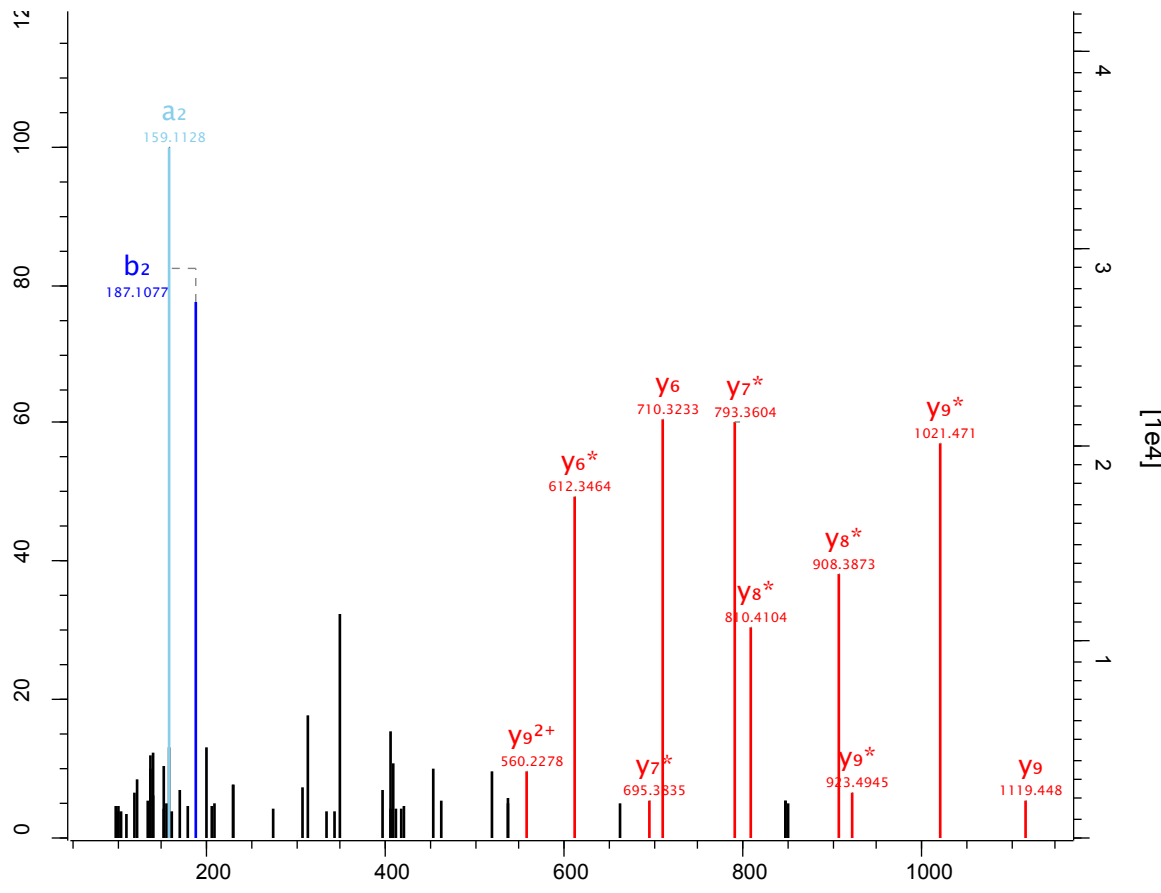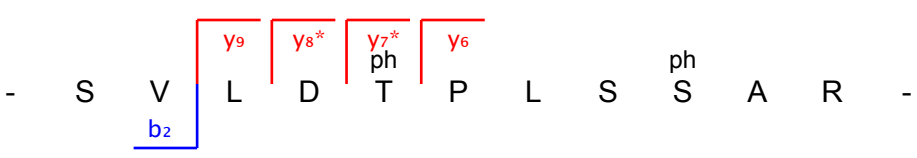

Raw file Scan Method Score m/z  
 2013\_COL15\_38\_45 27686 FTMS; HCD 44.34 691.56

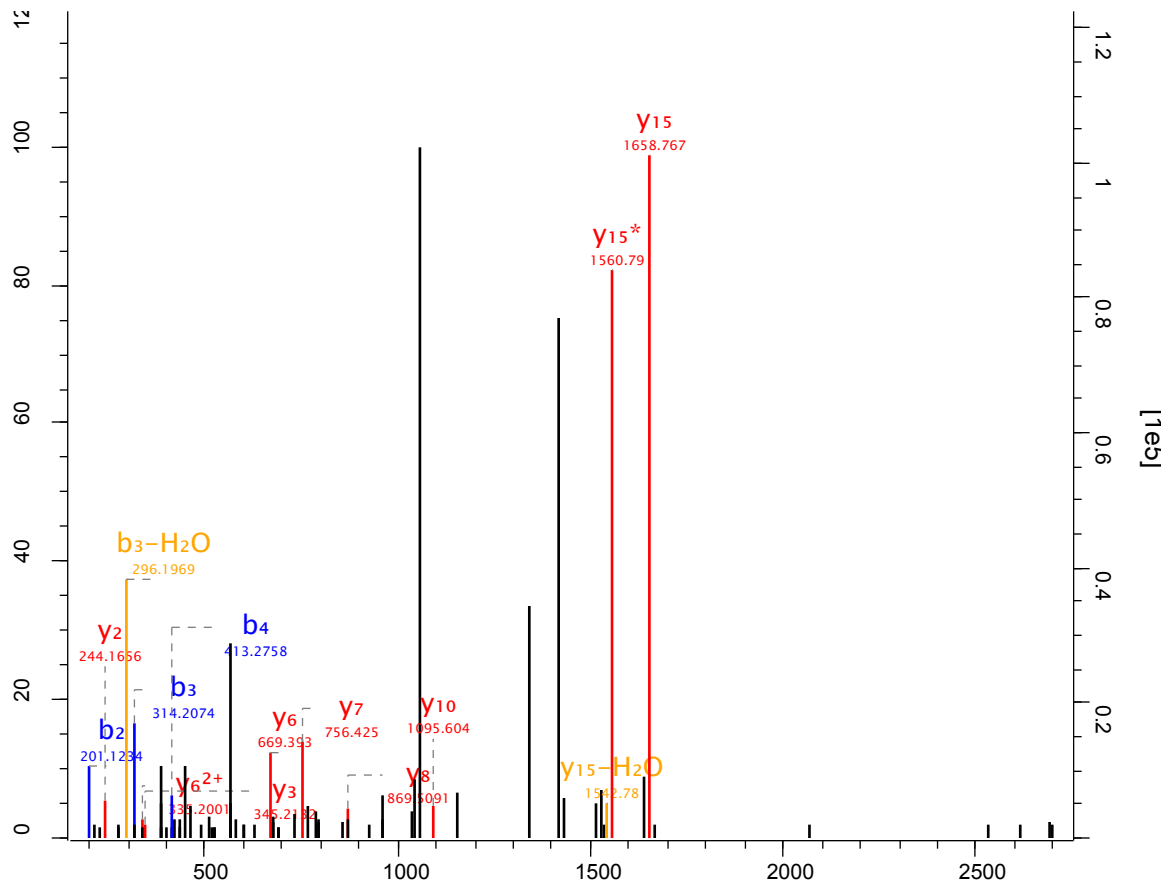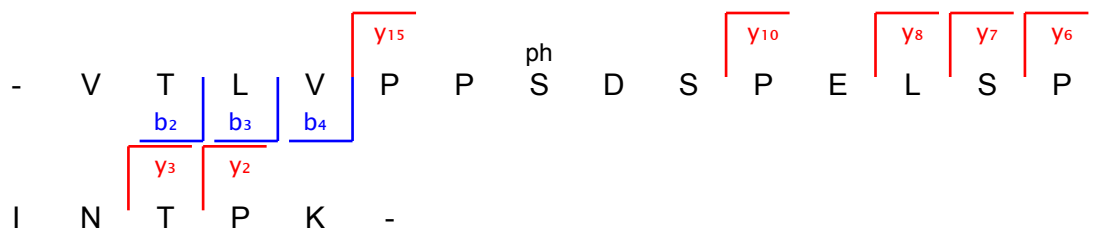

Raw file 2013\_COL15\_38\_45 Scan 27811 Method FTMS; HCD Score 75.96 m/z 778.68

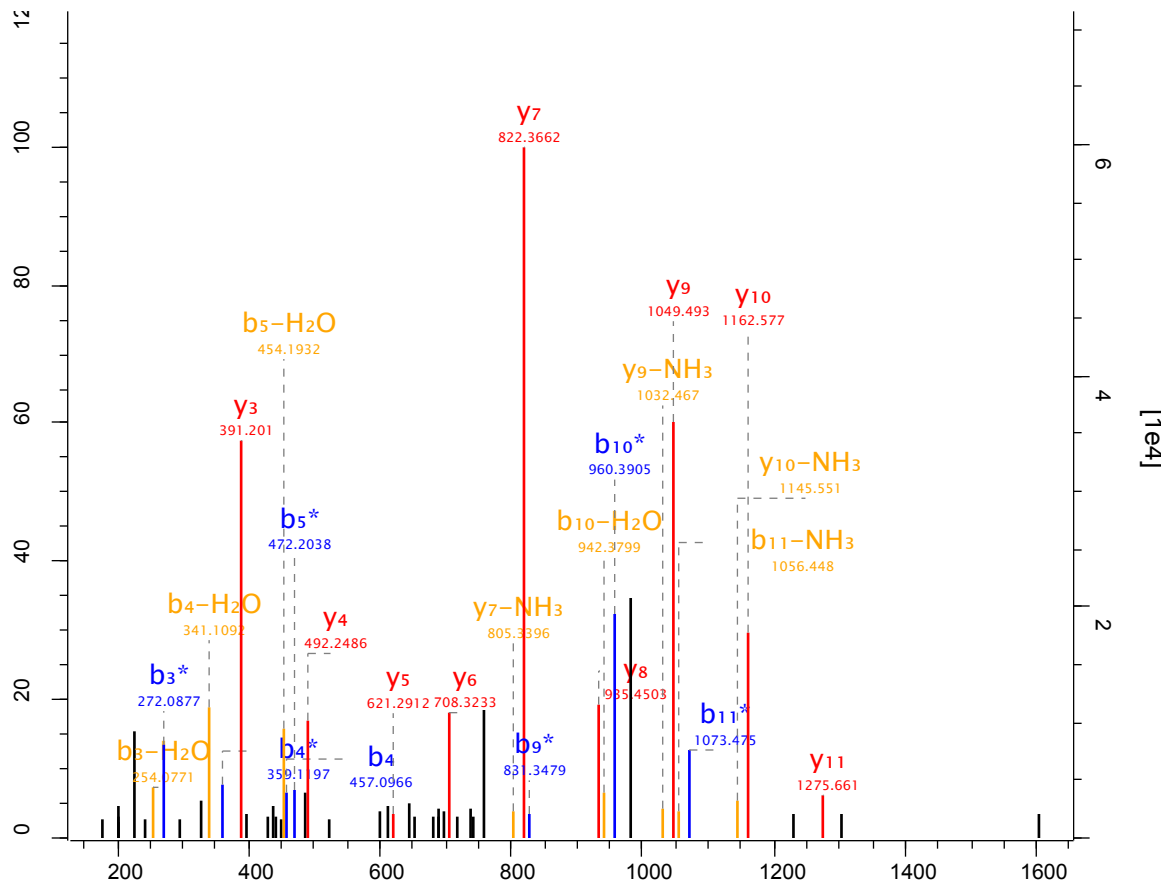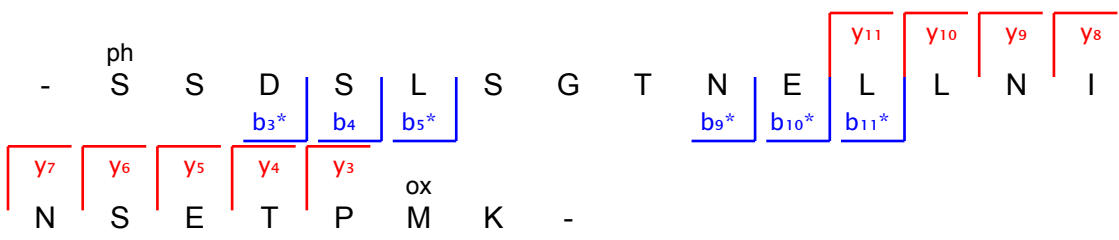

| Raw file         | Scan  | Method    | Score | m/z   |
|------------------|-------|-----------|-------|-------|
| 2013_COL15_38_45 | 28196 | FTMS; HCD | 46.07 | 694.8 |

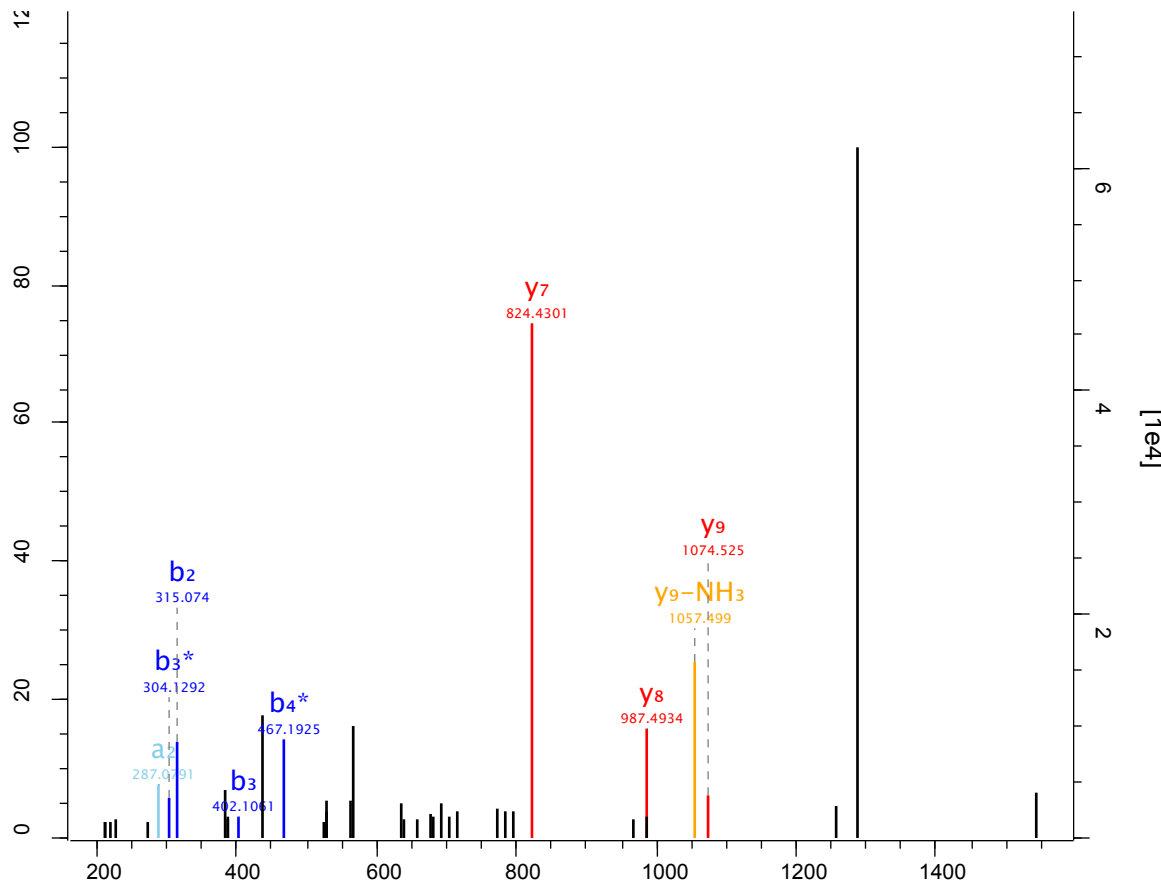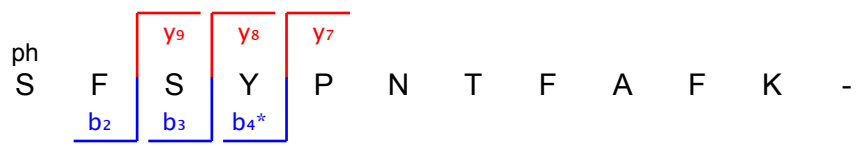



Raw file 2013\_COL15\_38\_45 Scan 28981 Method FTMS; HCD Score 59.5 m/z 779.32

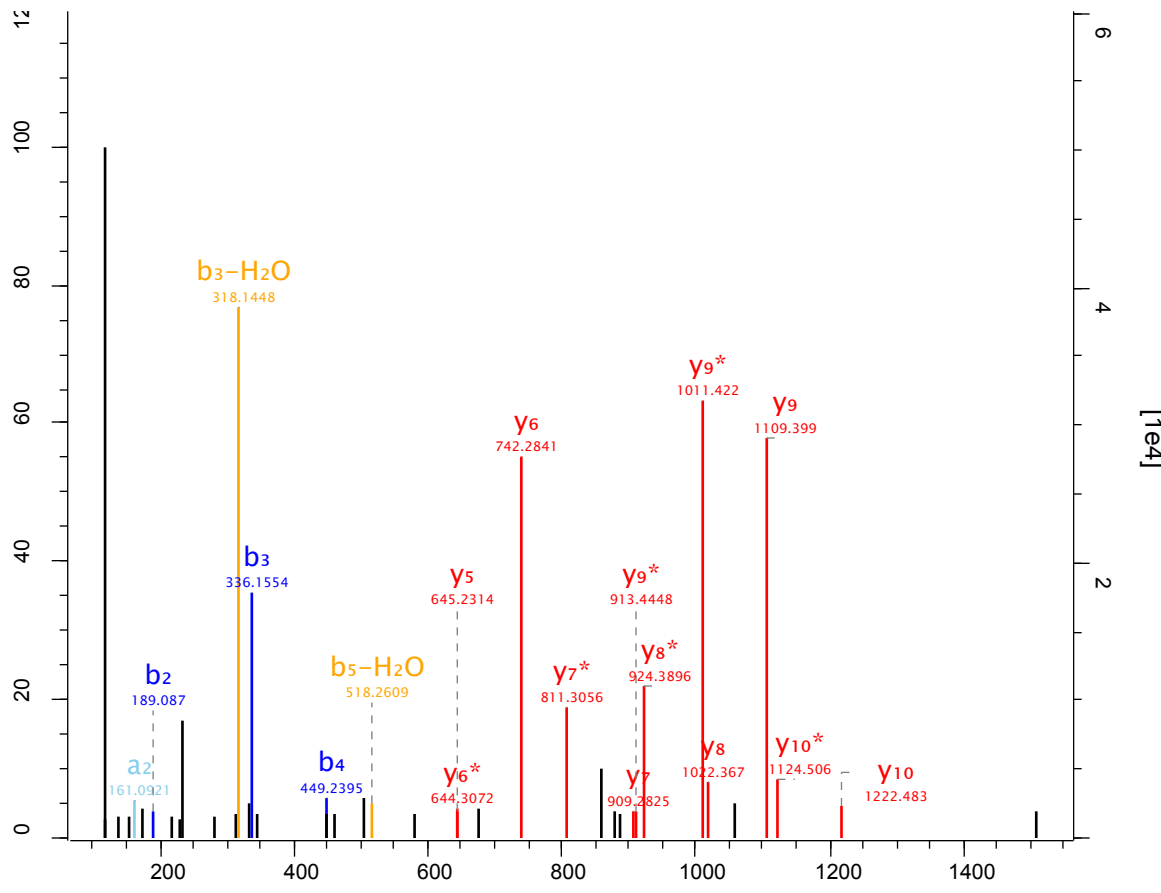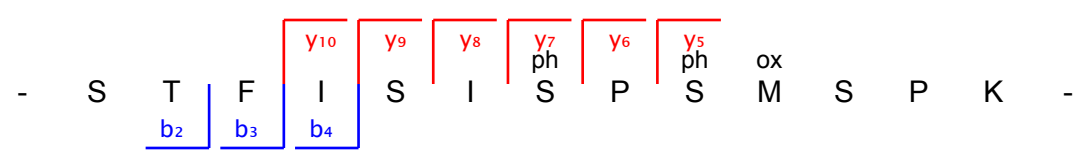

Raw file Scan Method Score m/z  
 2013\_COL15\_38\_45 29205 FTMS; HCD 47.33 949.72

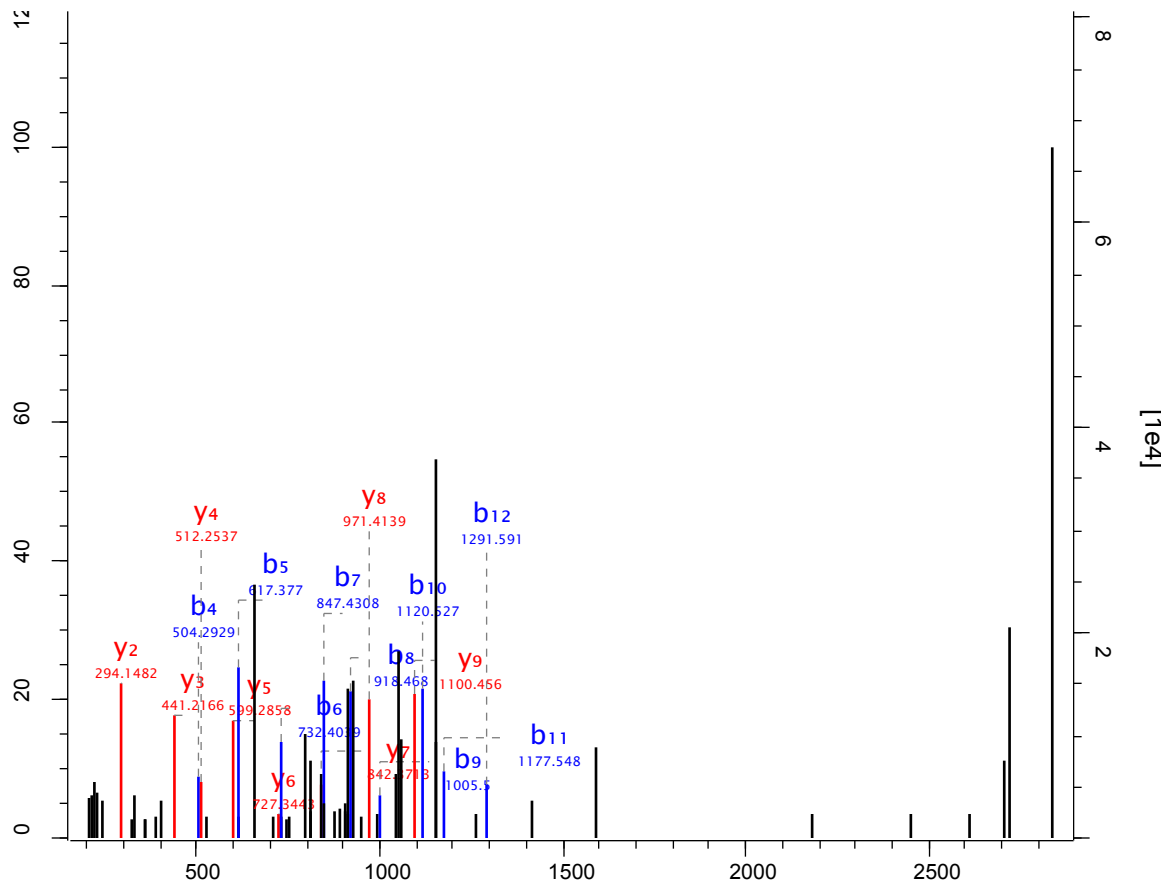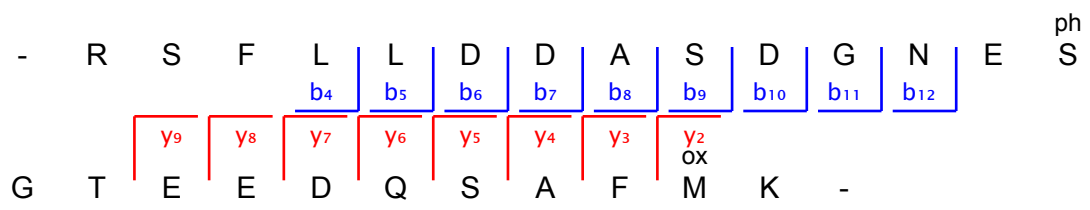

Raw file Scan Method Score m/z  
 2013\_COL15\_38\_45 29858 FTMS; HCD 44.79 798.01

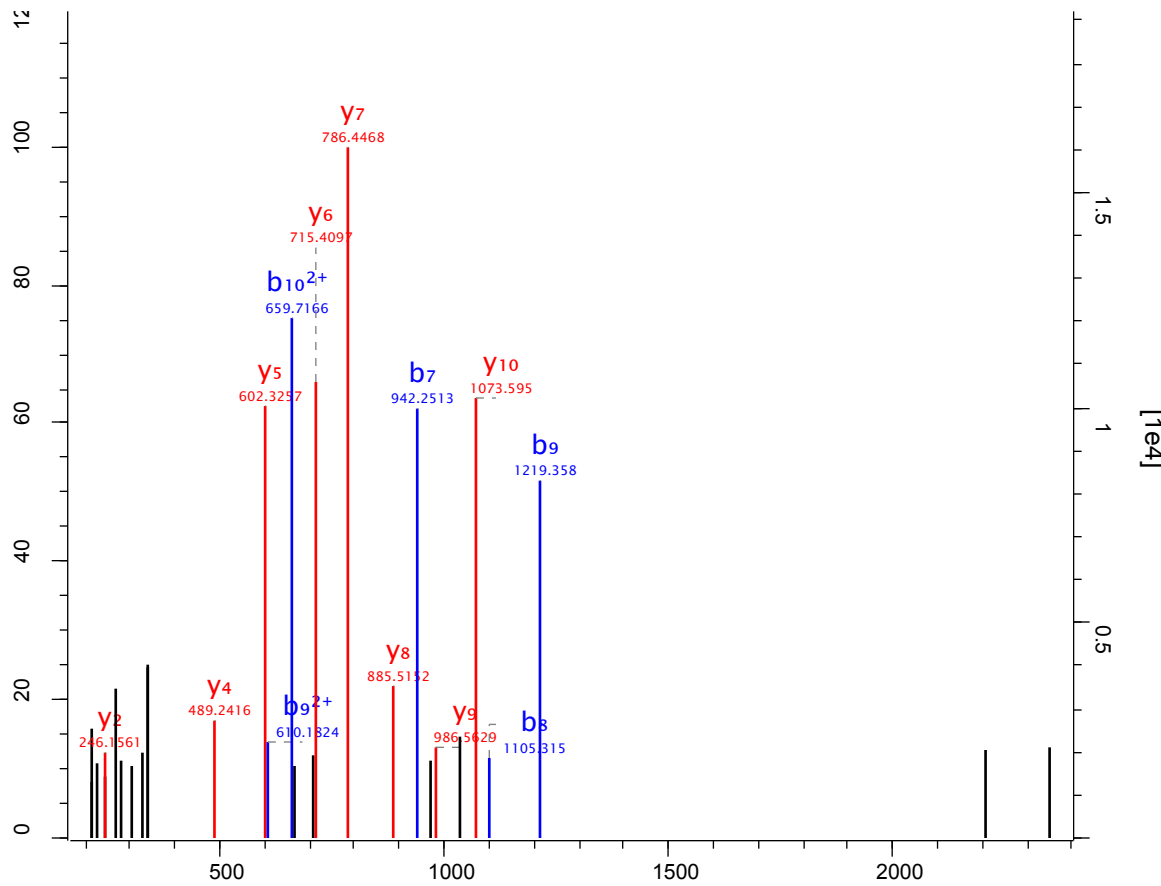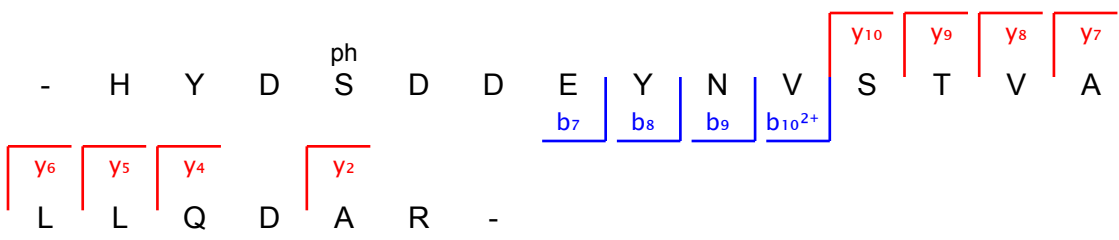

Raw file 2013\_COL15\_38\_45 Scan 30475 Method FTMS; HCD Score 79.39 m/z 798.39

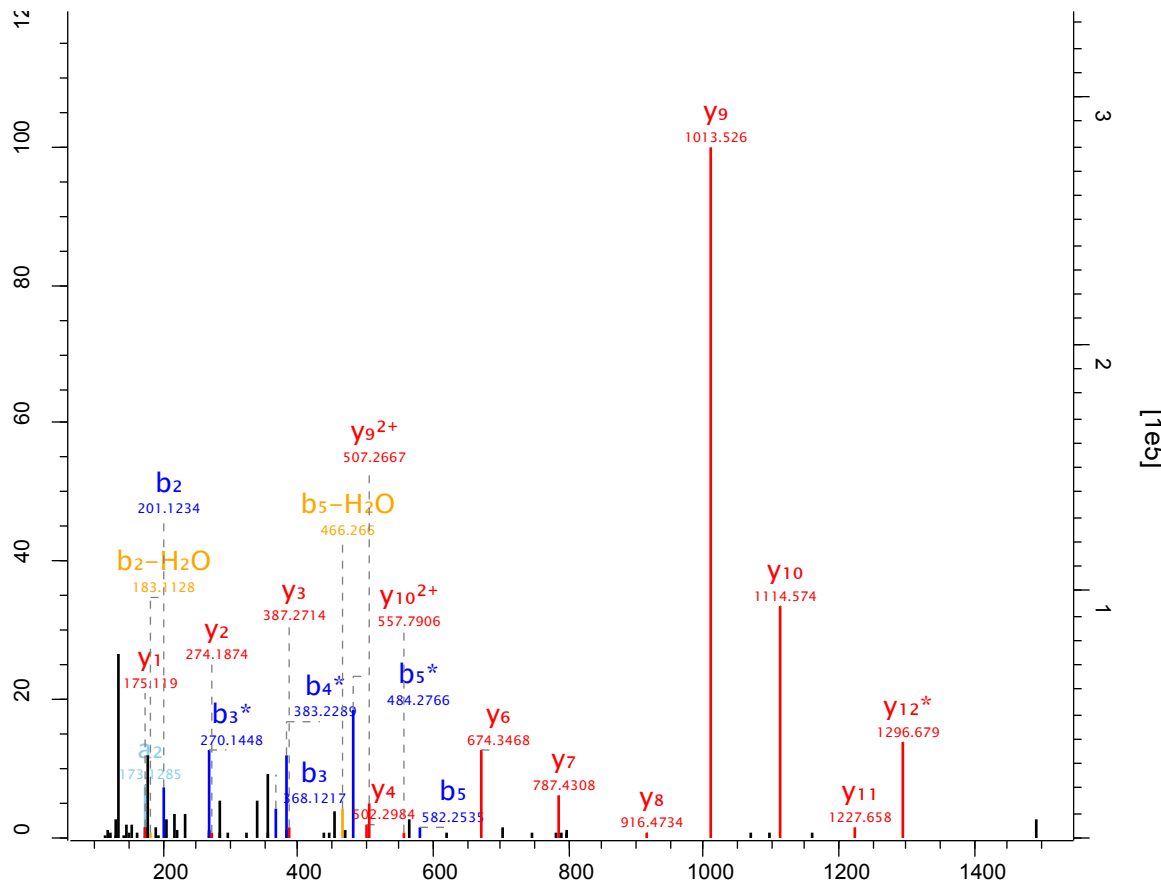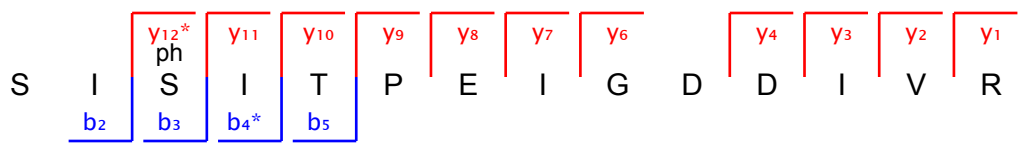

Raw file Scan Method Score m/z  
 2013\_COL15\_38\_45 3050 FTMS; HCD 60.31 554.89

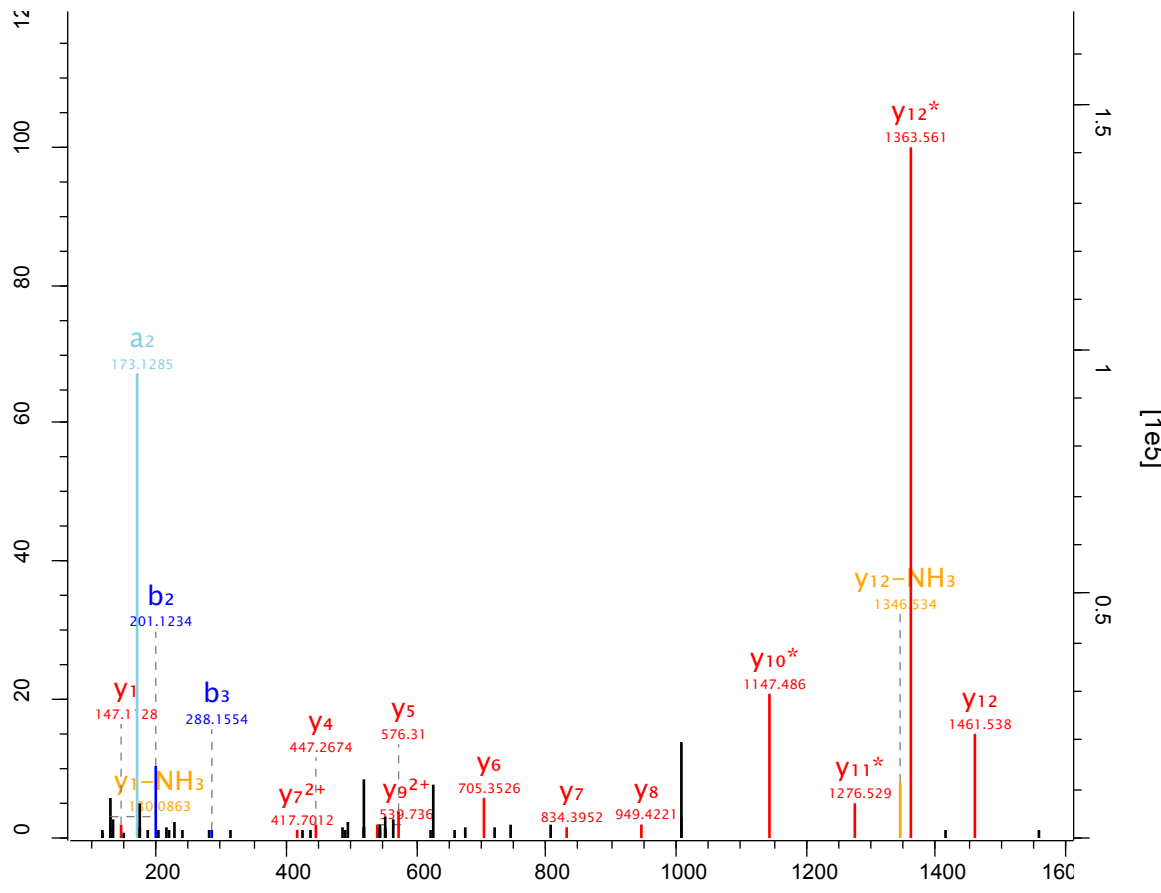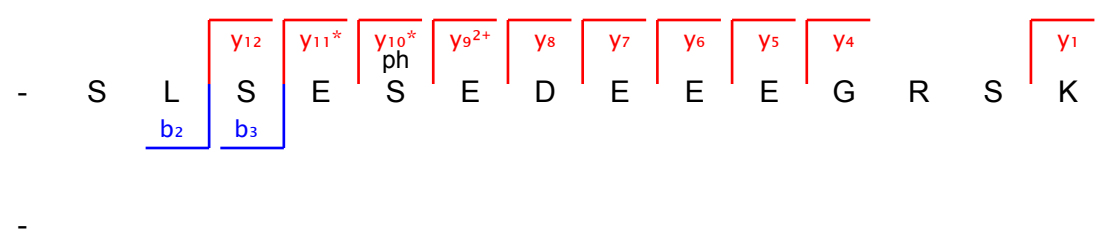

Raw file Scan Method Score m/z  
 2013\_COL15\_38\_45 30623 FTMS; HCD 51.5 820.84

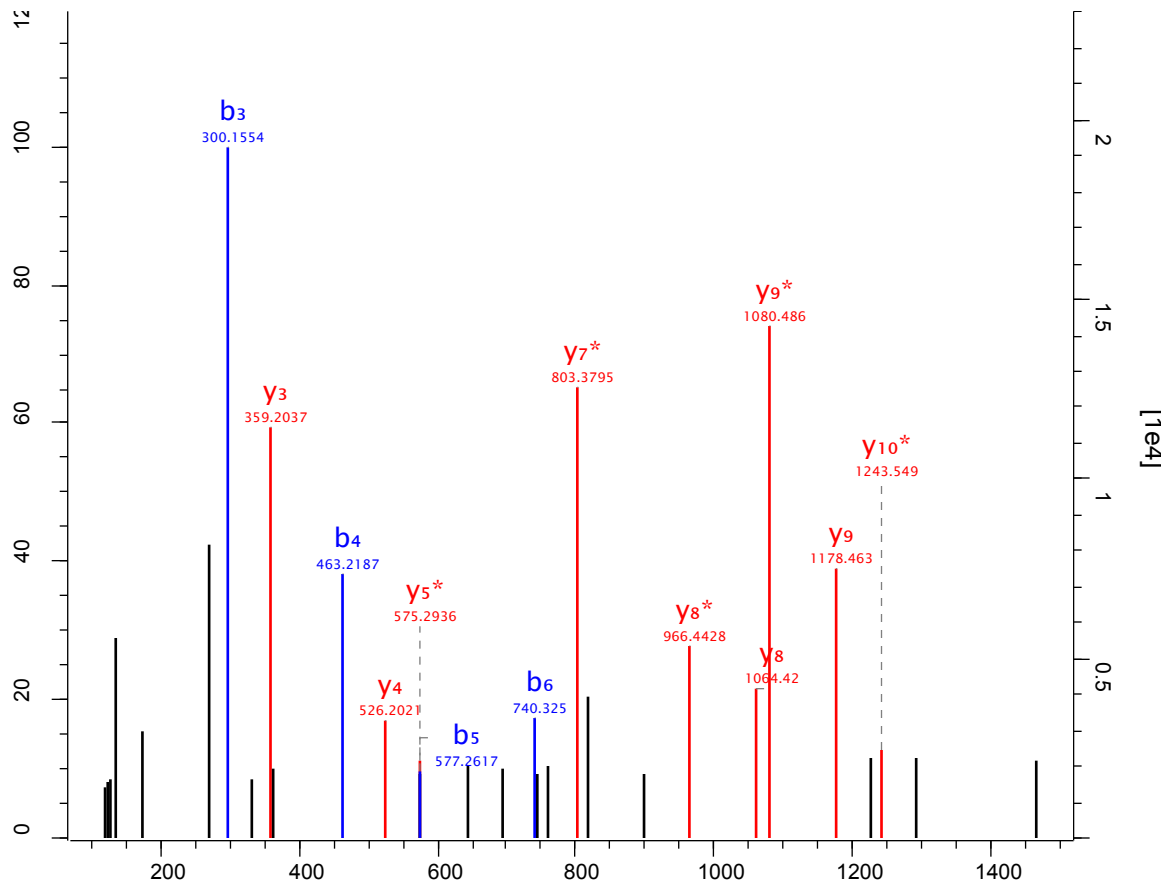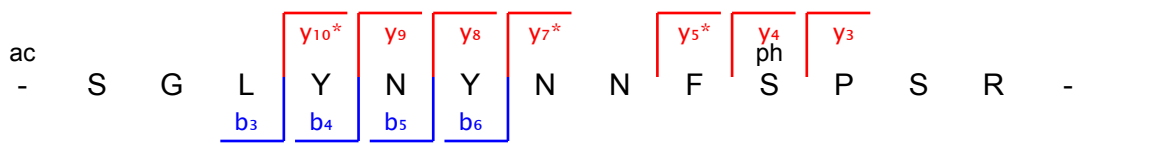

Raw file Scan Method Score m/z  
 2013\_COL15\_38\_45 31070 FTMS; HCD 58.98 698.34

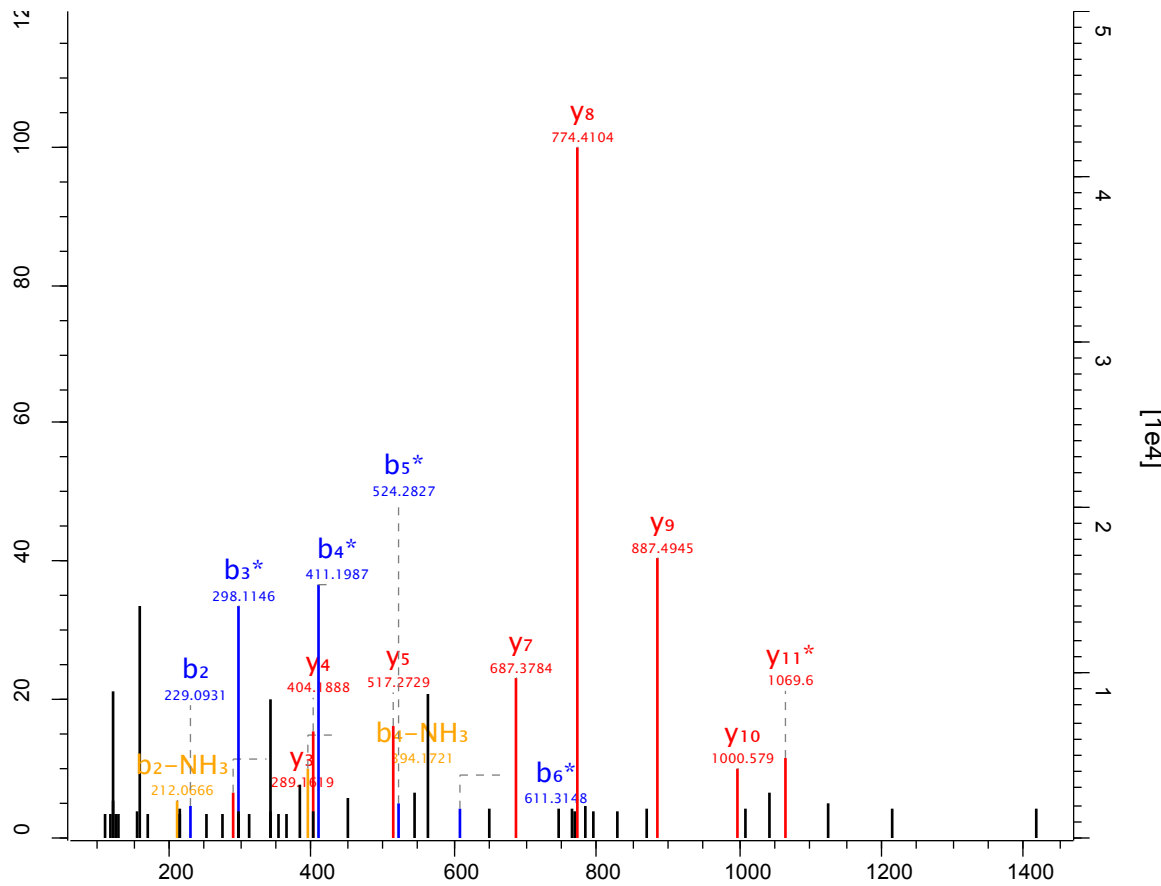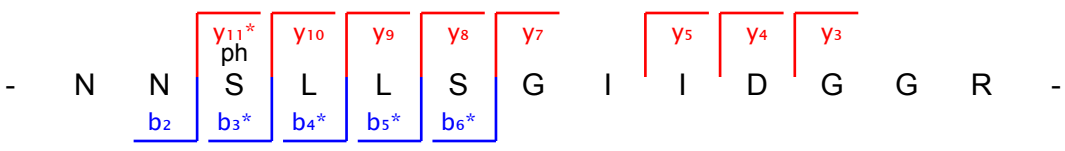

Raw file Scan Method Score m/z  
 2013\_COL15\_38\_45 31124 FTMS; HCD 47.12 807.74

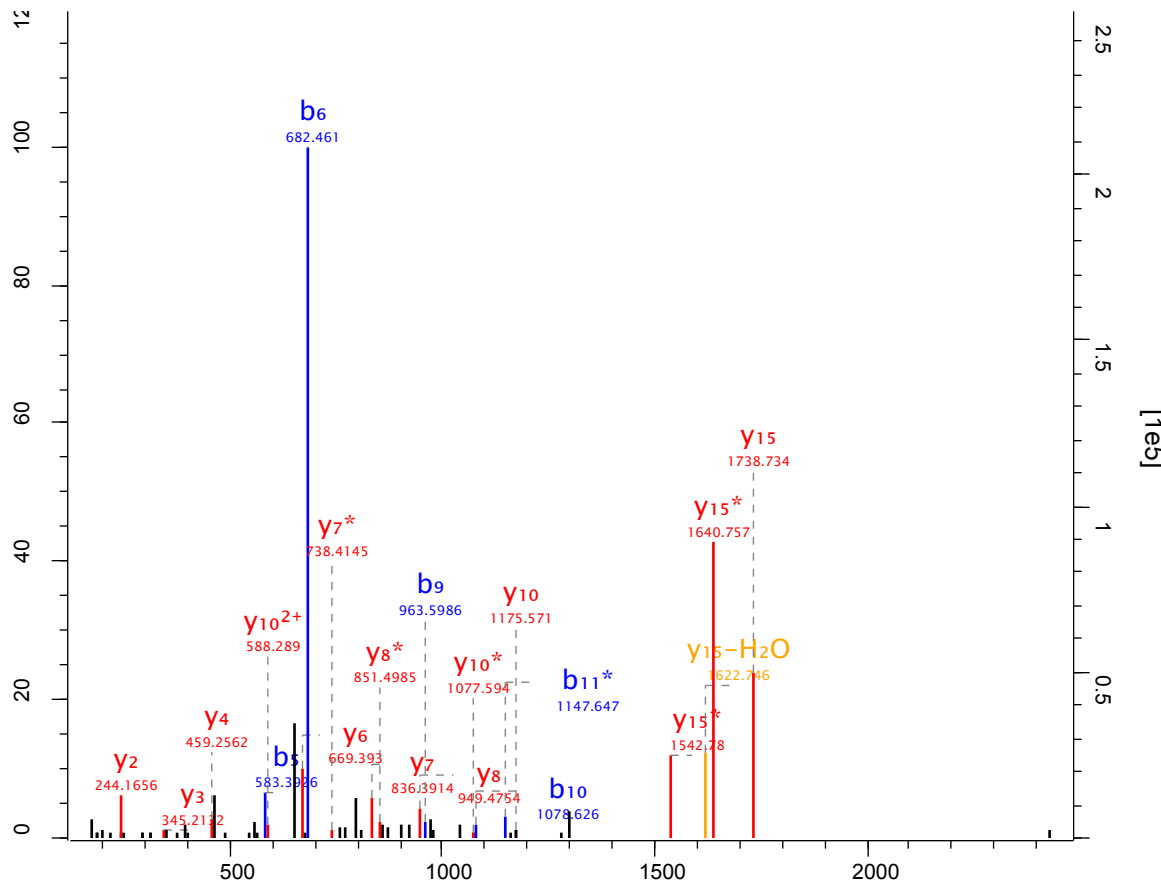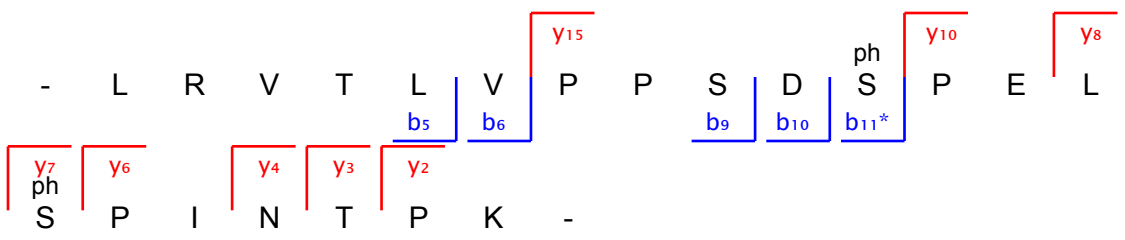



Raw file Scan Method Score m/z  
 2013\_COL15\_38\_45 31345 FTMS; HCD 51.09 920.41

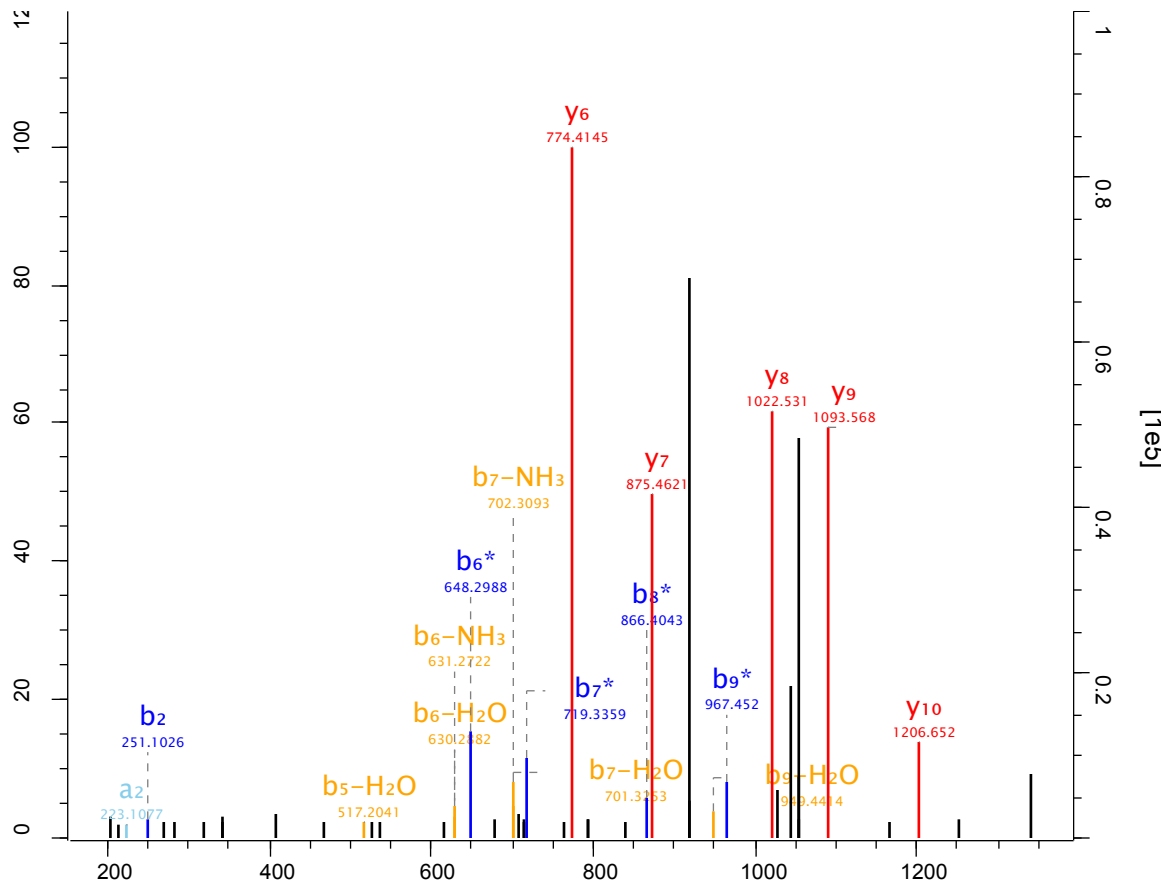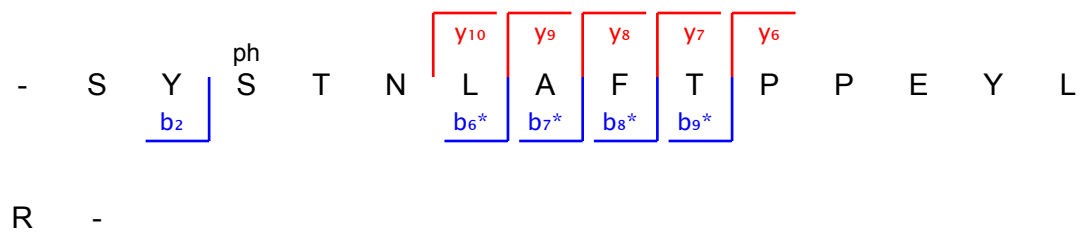

R -

| Raw file         | Scan  | Method    | Score | m/z    |
|------------------|-------|-----------|-------|--------|
| 2013_COL15_38_45 | 31579 | FTMS; HCD | 41.91 | 902.08 |

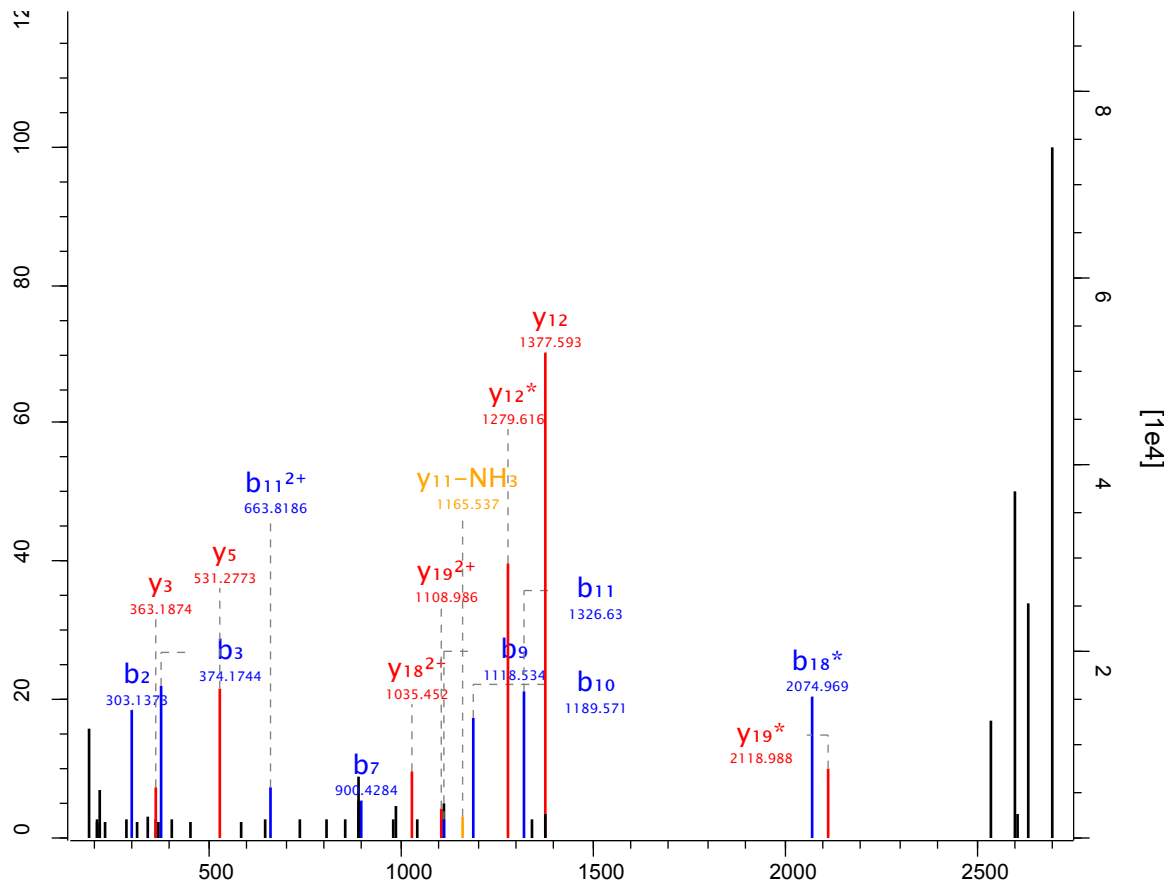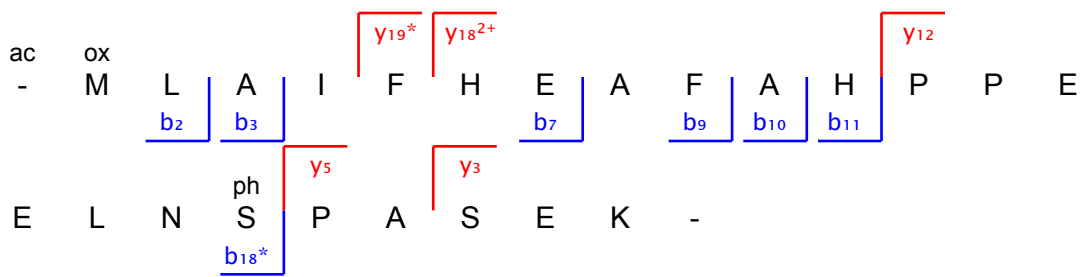

Raw file 2013\_COL15\_38\_45 Scan 31702 Method FTMS; HCD Score 121.32 m/z 730.81

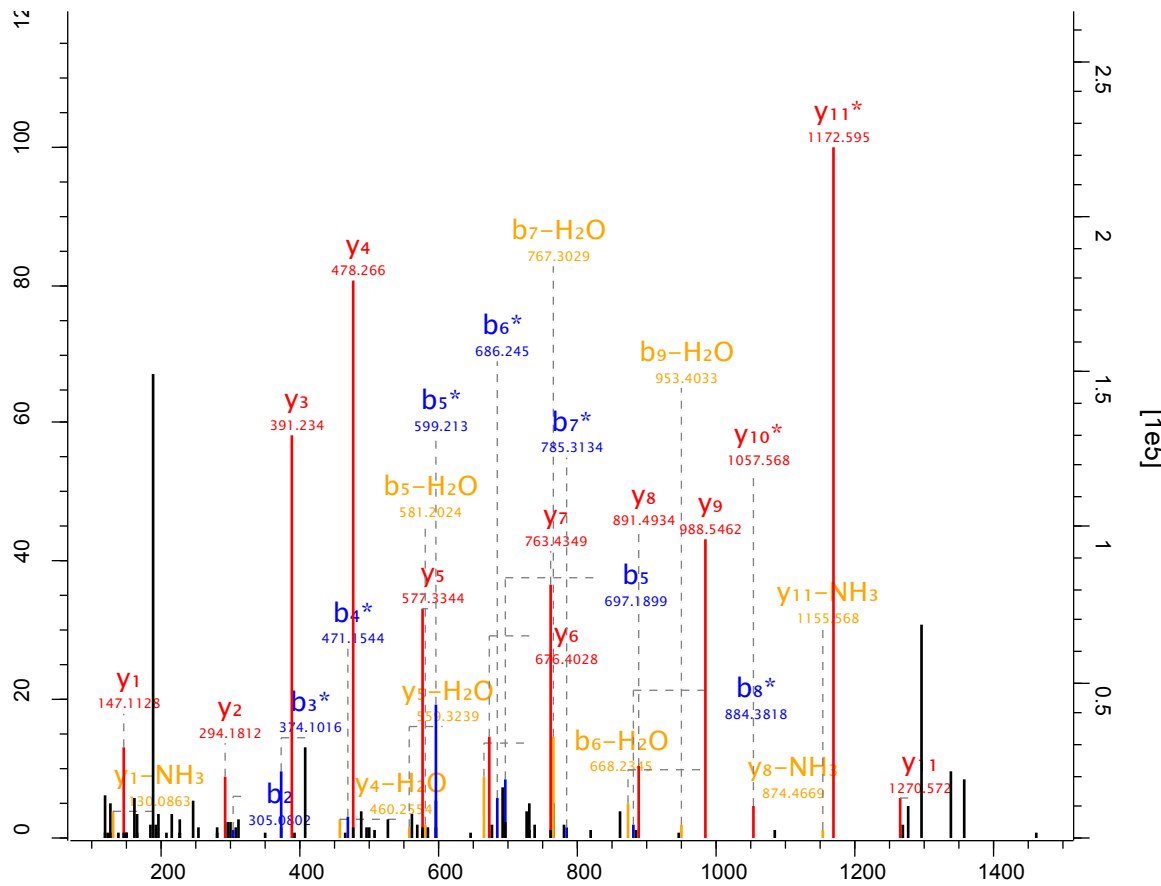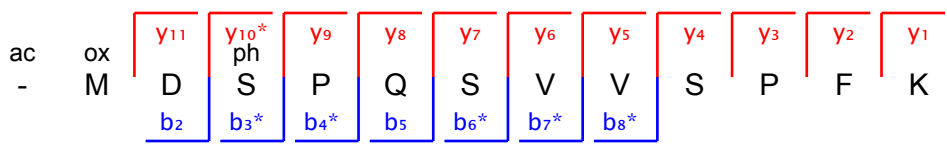

Raw file Scan Method Score m/z  
 2013\_COL15\_38\_45 3172 FTMS; HCD 55.2 422.52

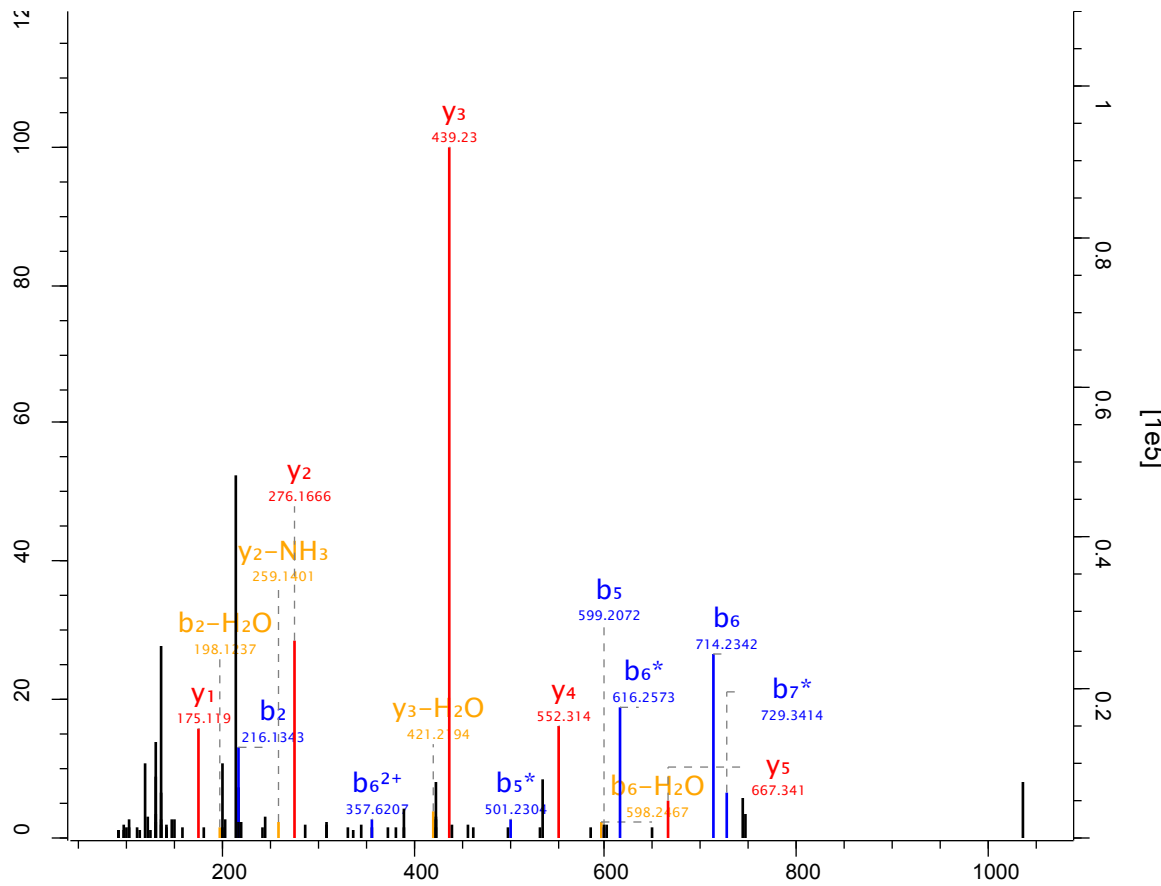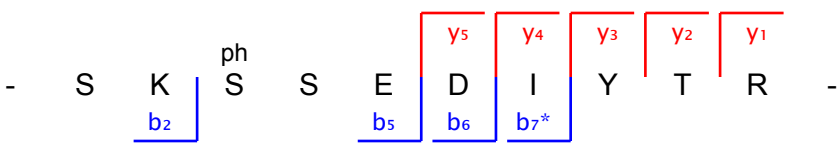

Raw file Scan Method Score m/z  
 2013\_COL15\_38\_45 32514 FTMS; HCD 68.05 916.45

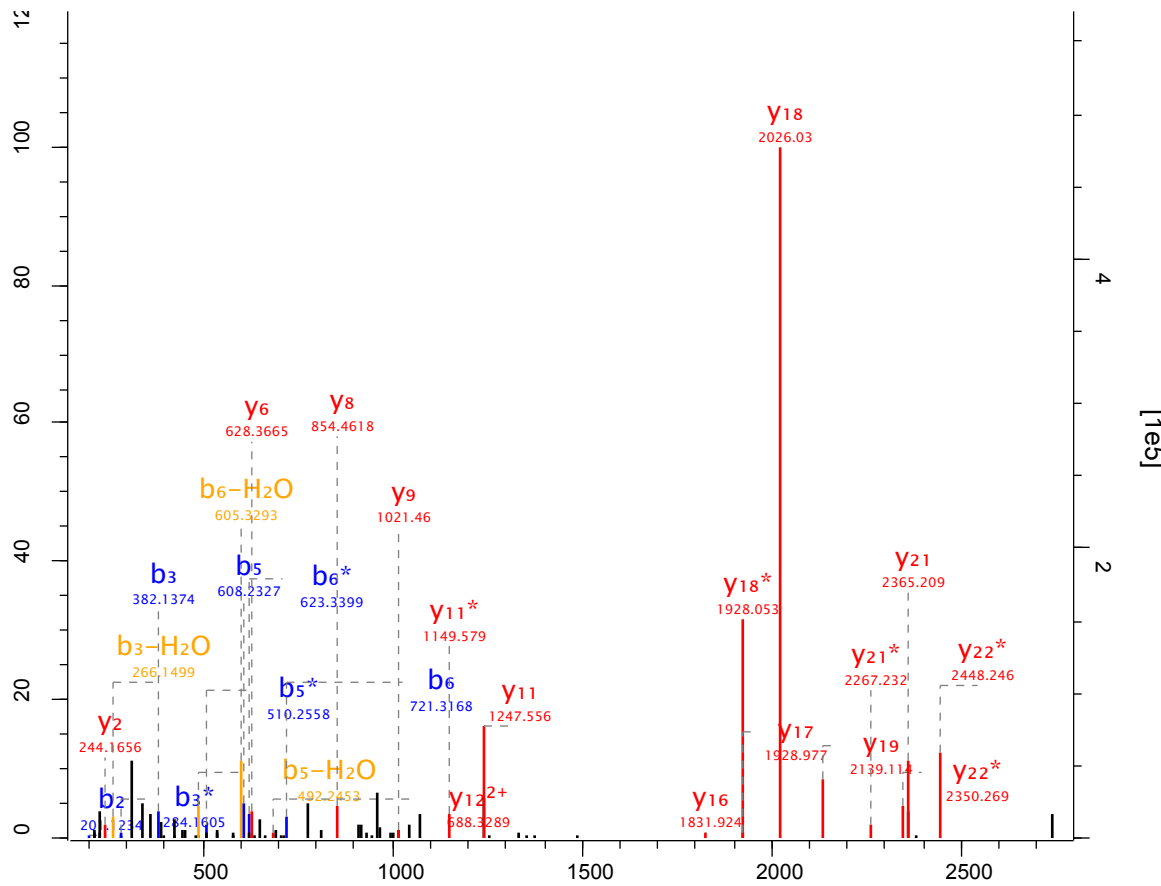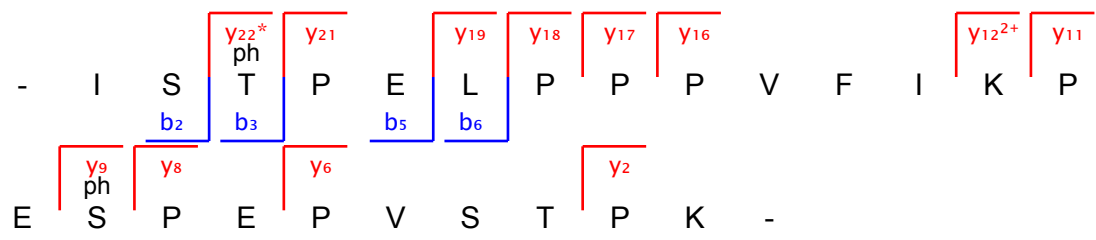

| Raw file         | Scan | Method    | Score | m/z   |
|------------------|------|-----------|-------|-------|
| 2013_COL15_38_45 | 3260 | FTMS; HCD | 53.3  | 616.3 |

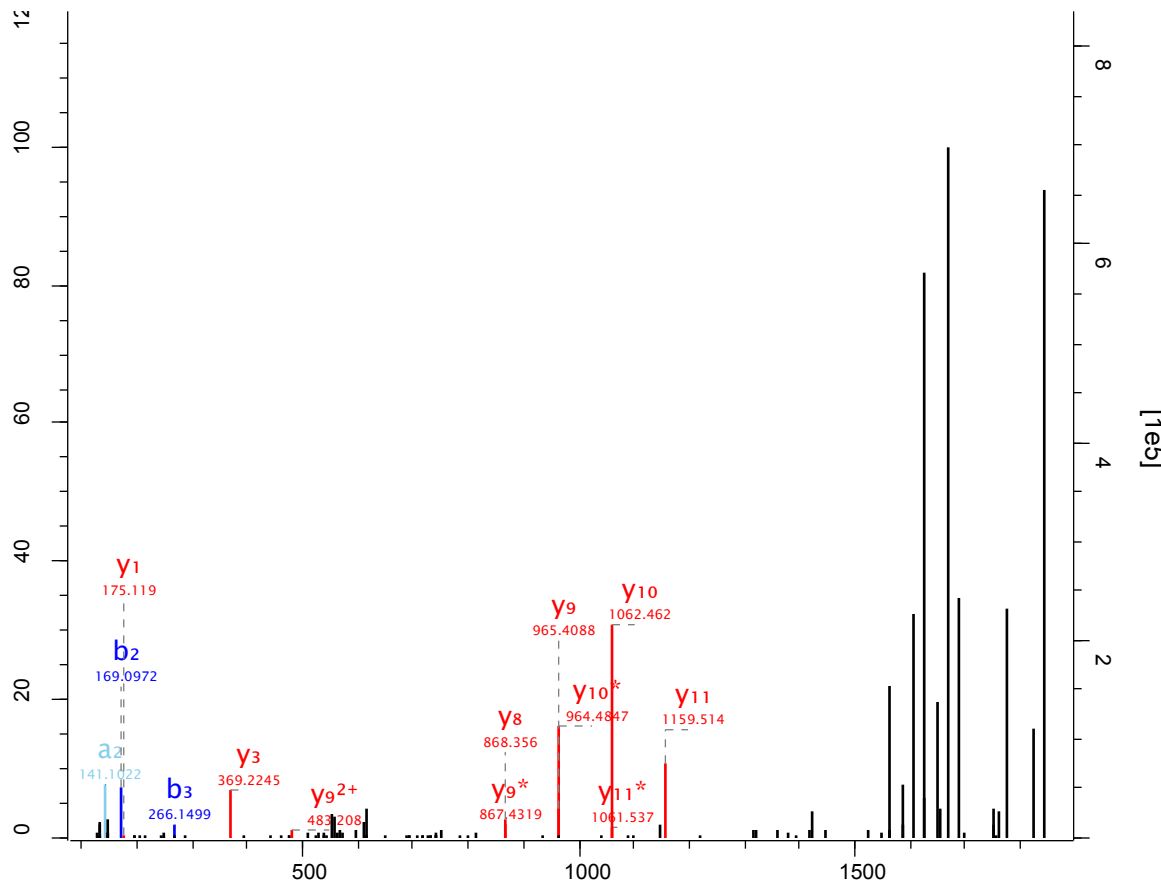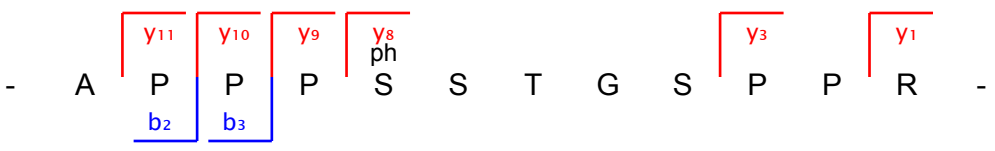

Raw file Scan Method Score m/z  
 2013\_COL15\_38\_45 3268 FTMS; HCD 41.26 589.6

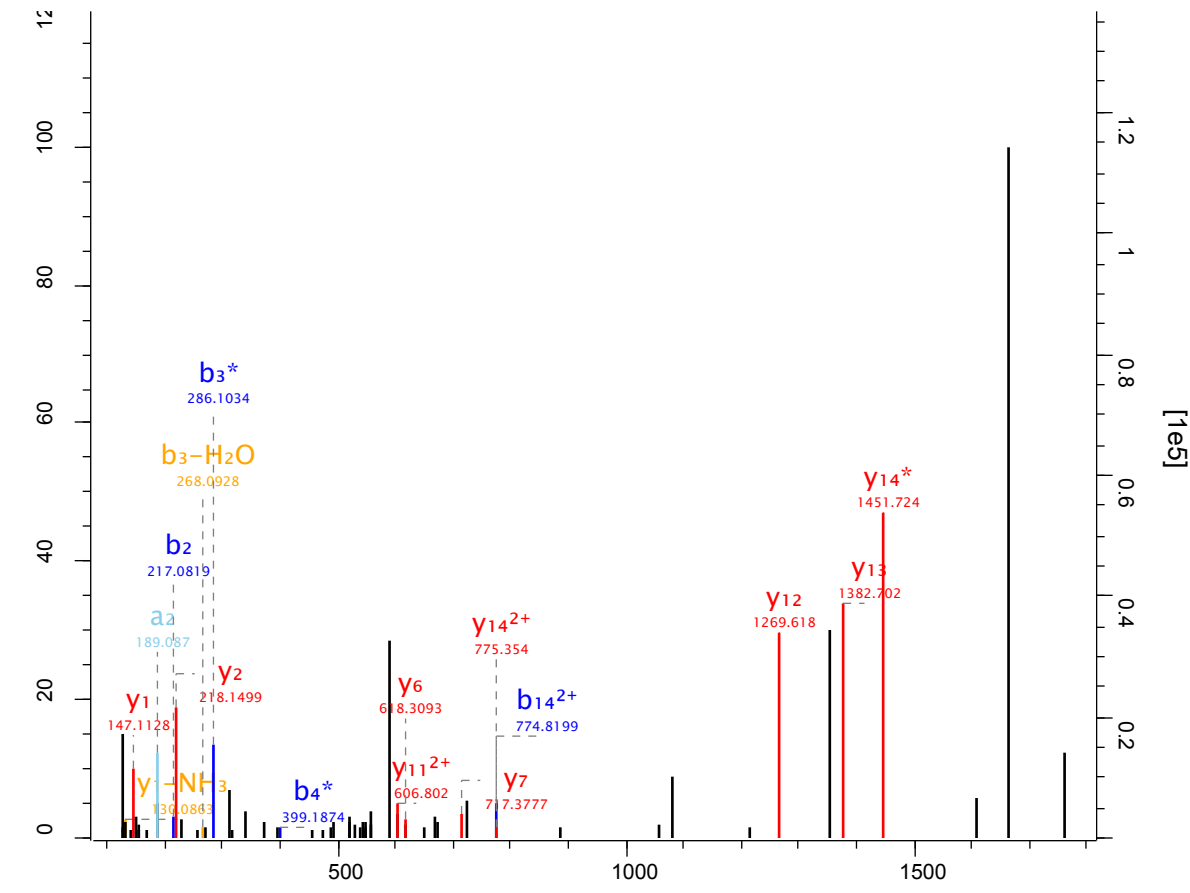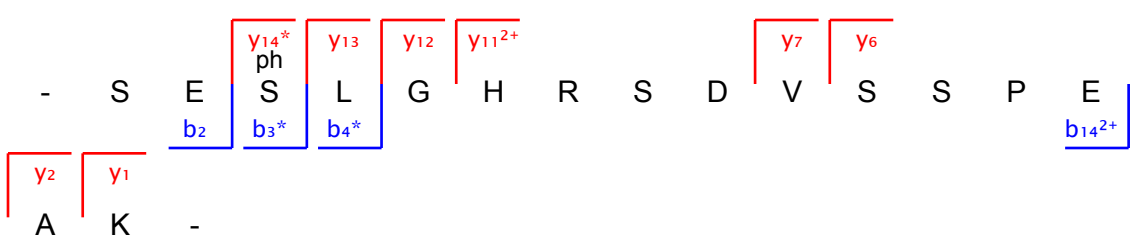

Raw file Scan Method Score m/z  
 2013\_COL15\_38\_45 32802 FTMS; HCD 50.5 881.39

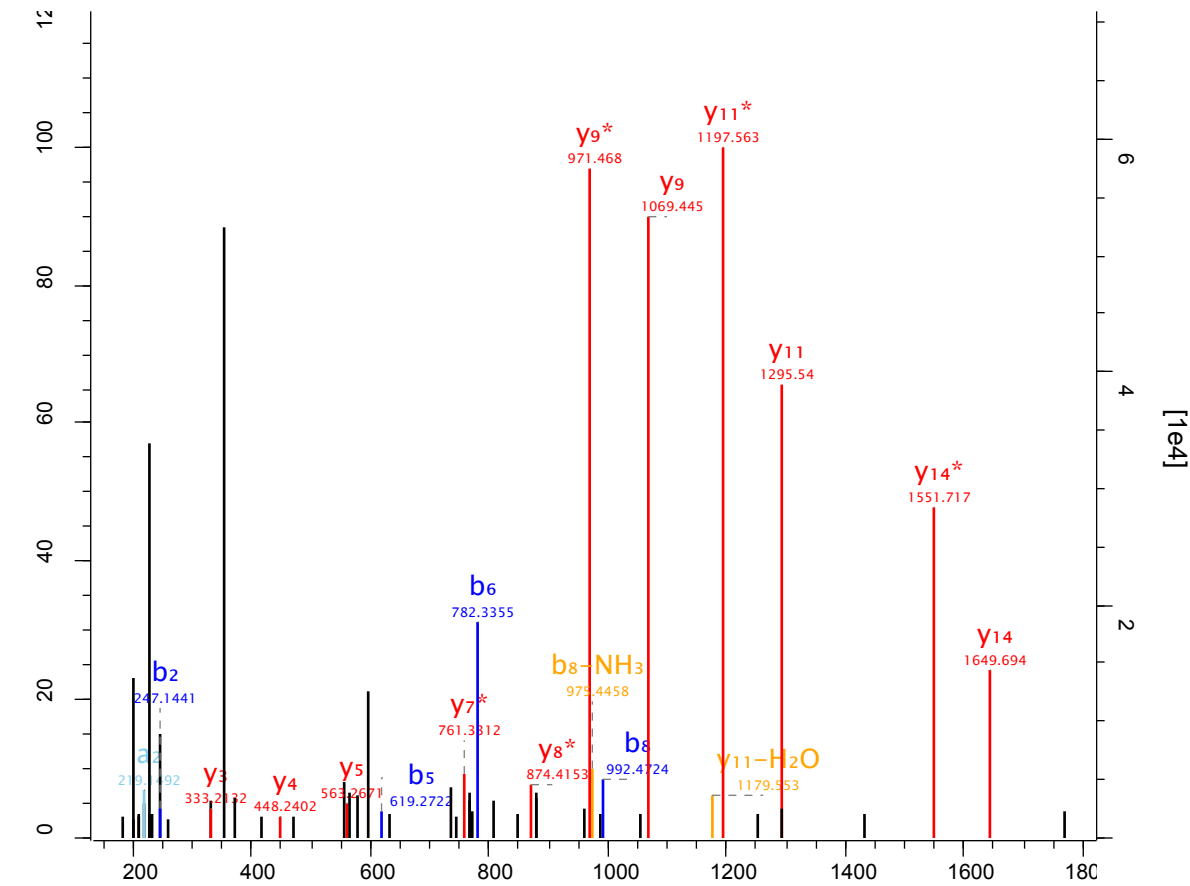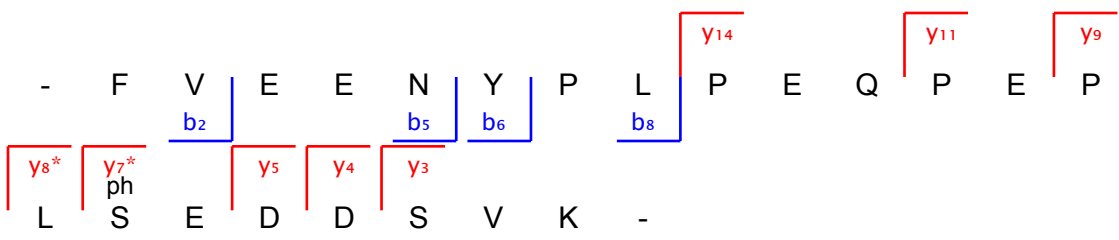



Raw file Scan Method Score m/z  
 2013\_COL15\_38\_45 33078 FTMS; HCD 123.19 1011.42

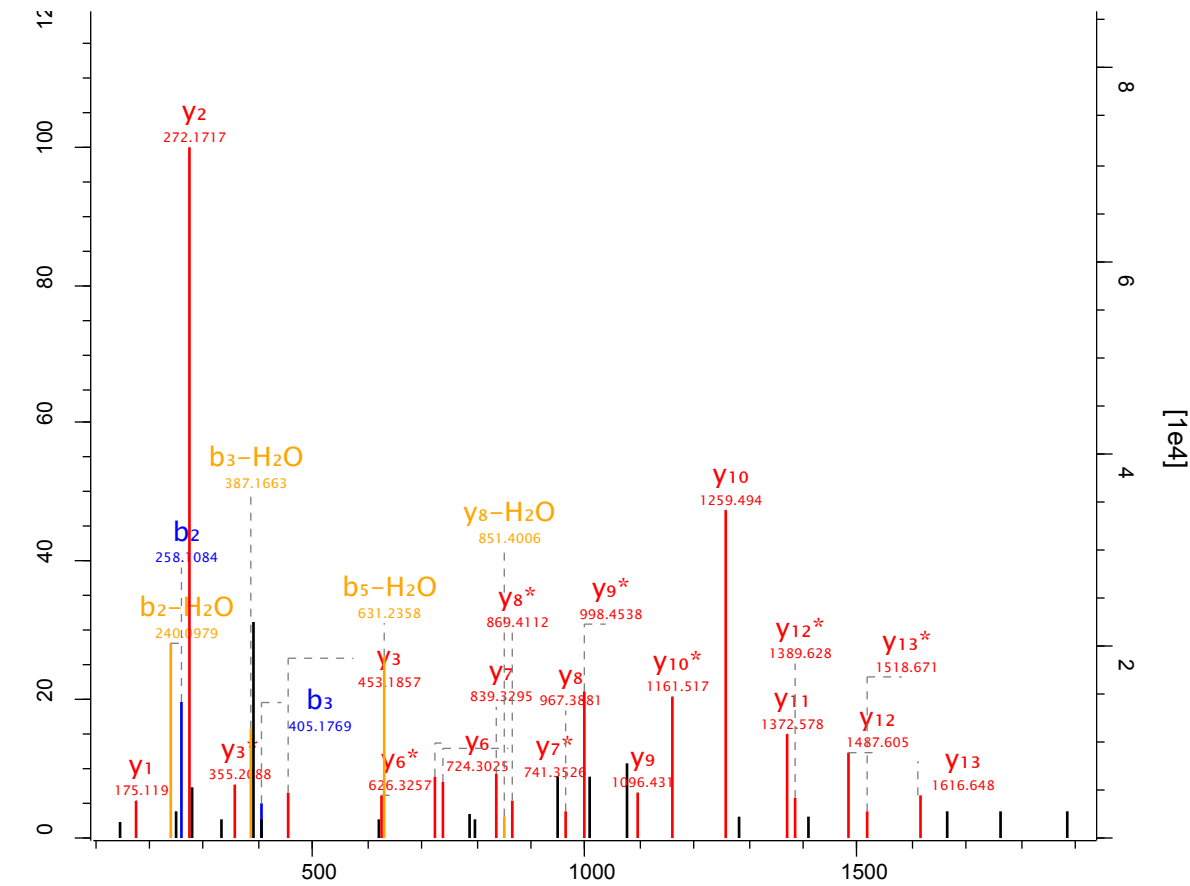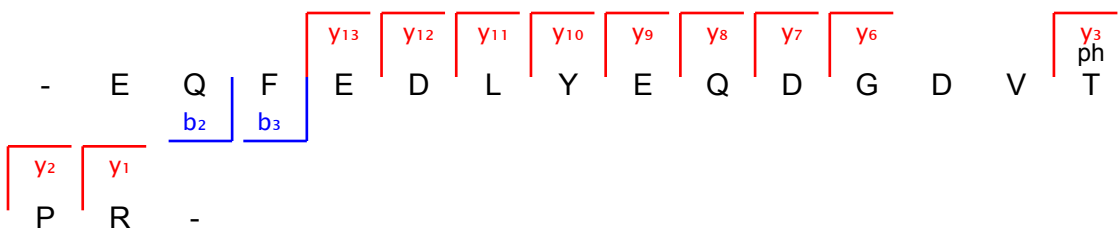

Raw file 2013\_COL15\_38\_45 Scan 33303 Method FTMS; HCD Score 108.5 m/z 873.41

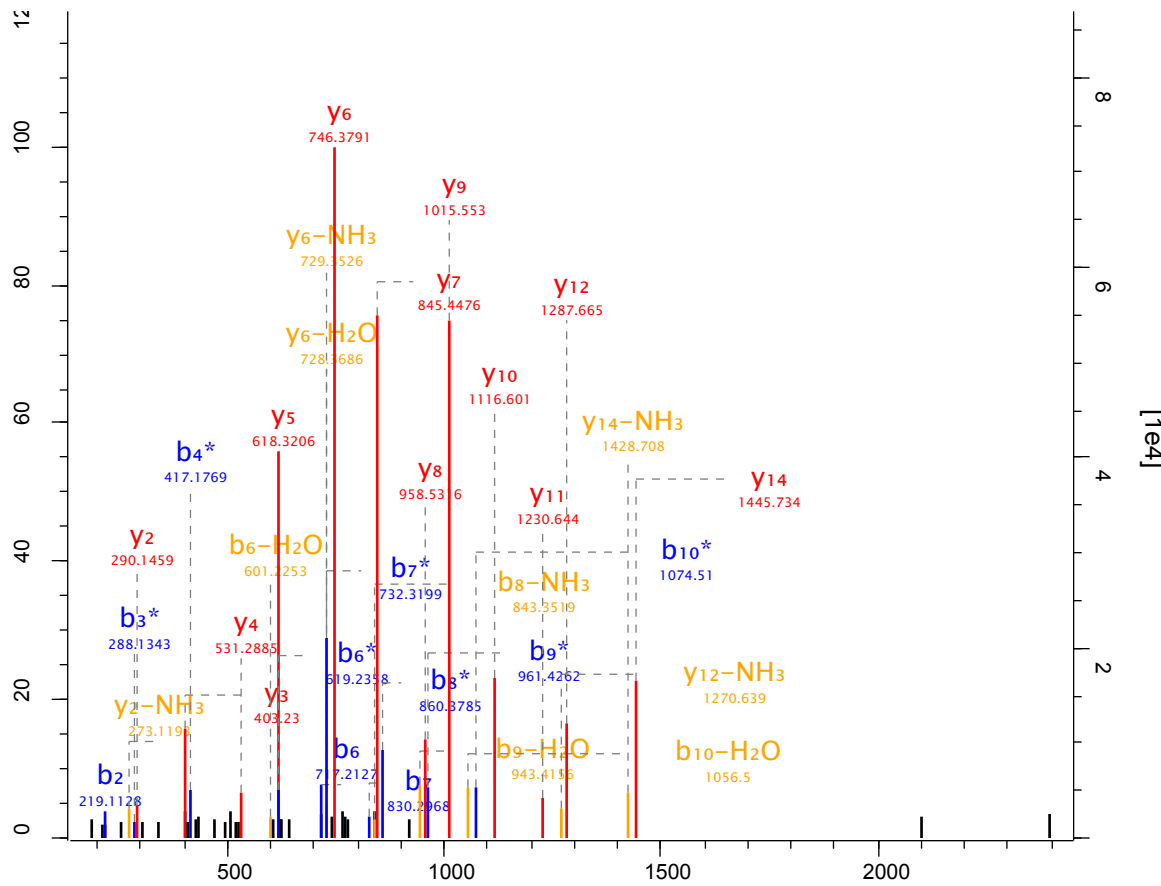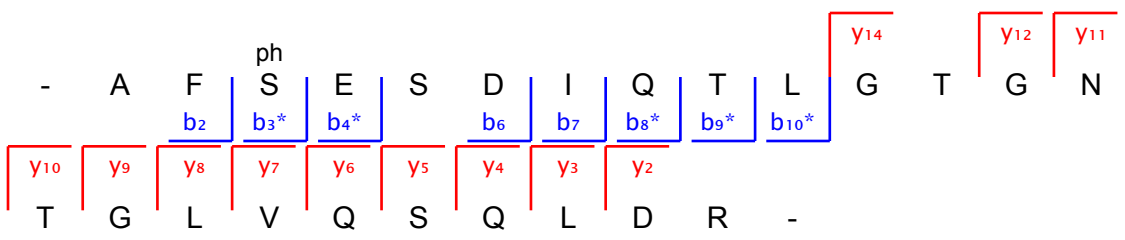



Raw file Scan Method Score m/z  
 2013\_COL15\_38\_45 34667 FTMS; HCD 142.91 862.84

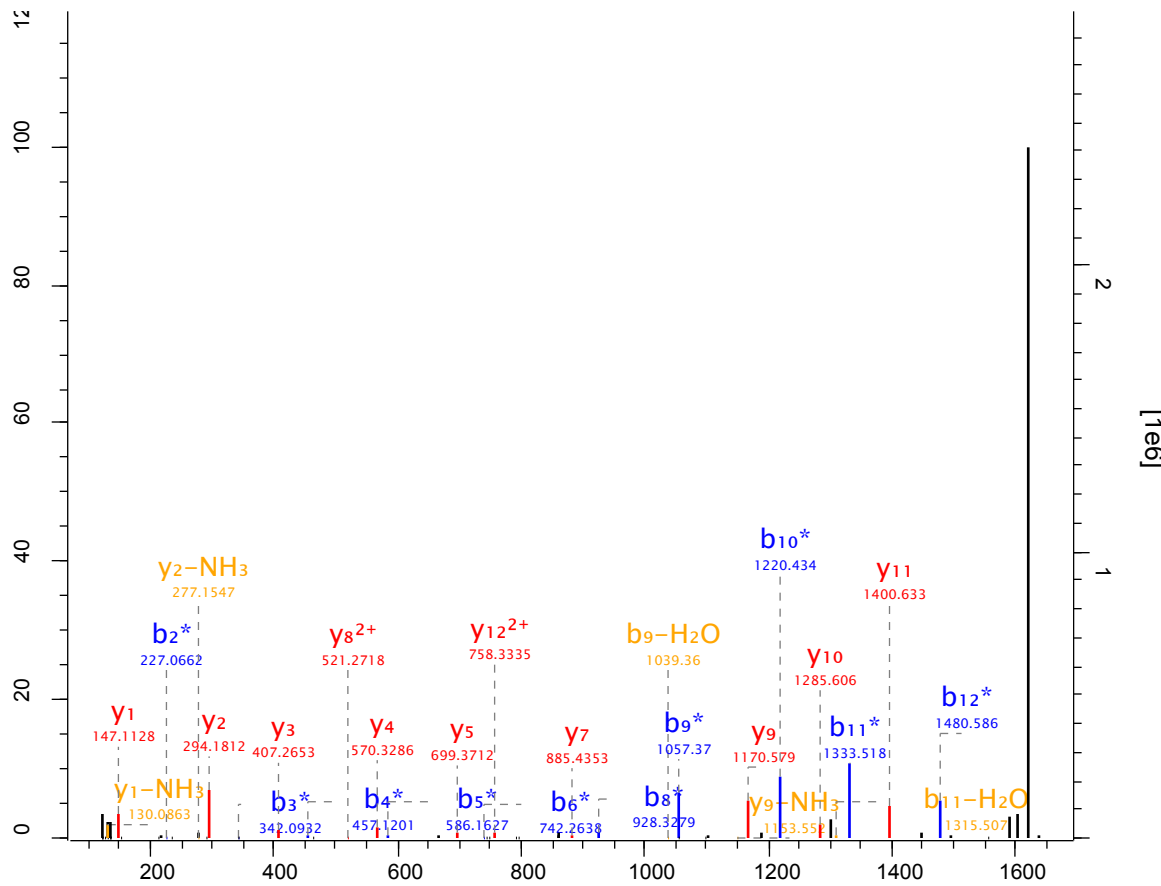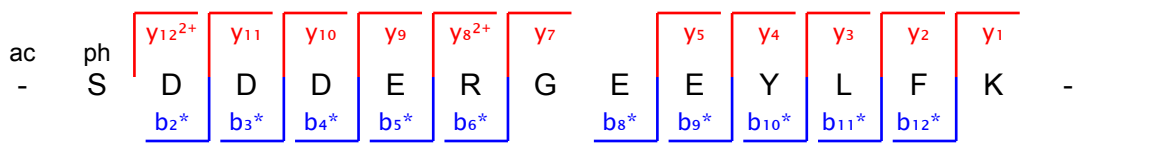

Raw file Scan Method Score m/z  
 2013\_COL15\_38\_45 34921 FTMS; HCD 121.64 1081.48

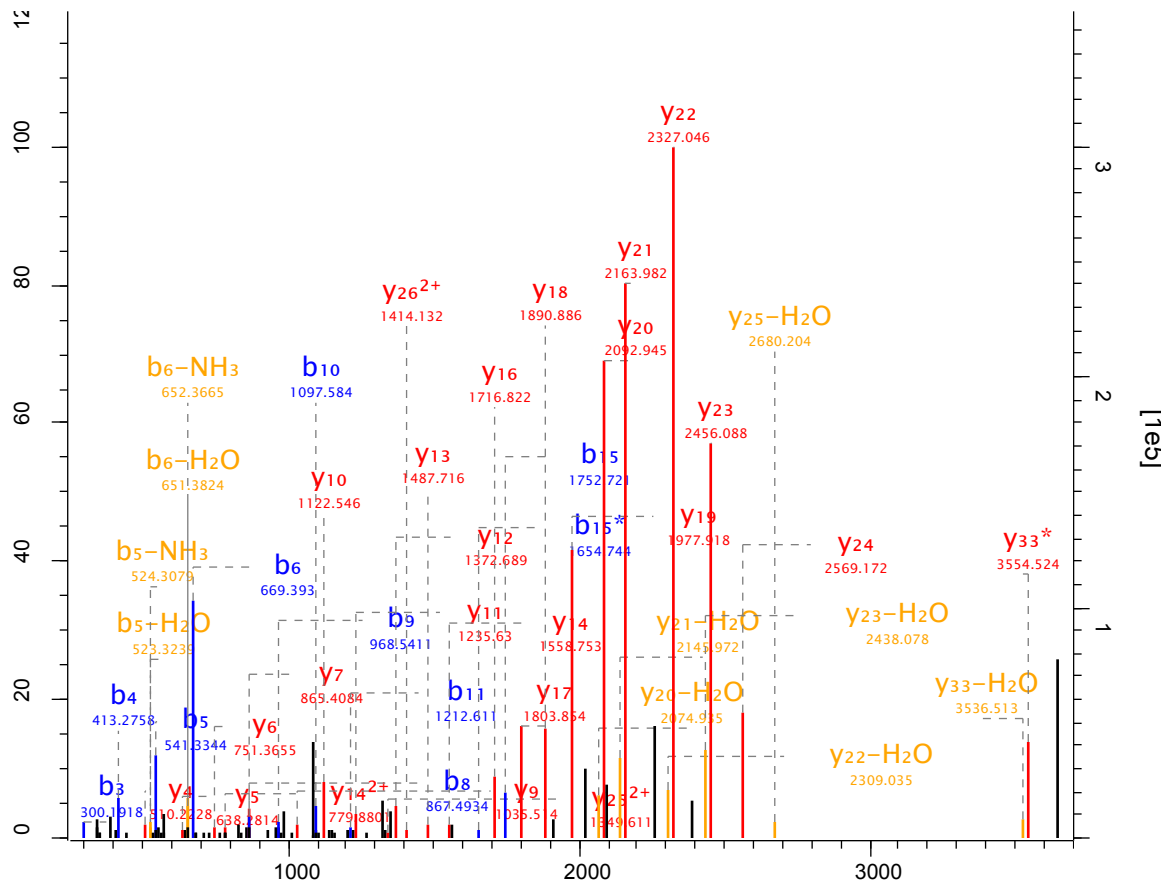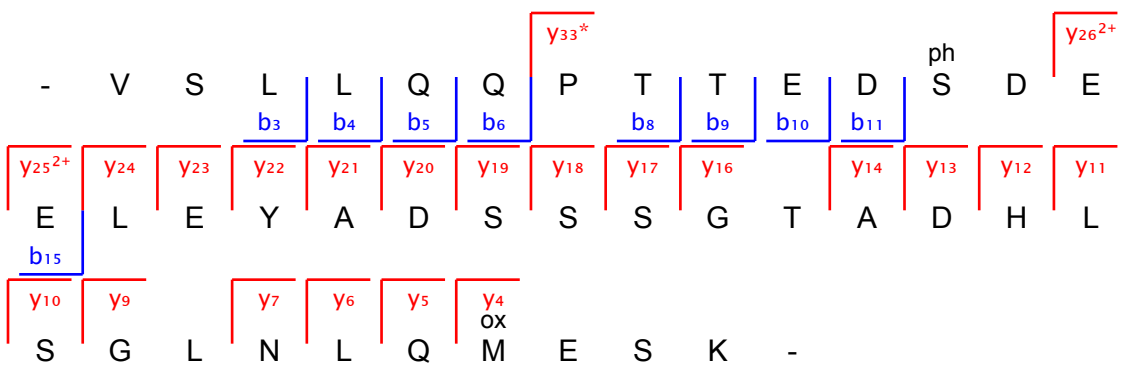

| Raw file         | Scan  | Method    | Score | m/z    |
|------------------|-------|-----------|-------|--------|
| 2013_COL15_38_45 | 35091 | FTMS; HCD | 44.25 | 753.85 |

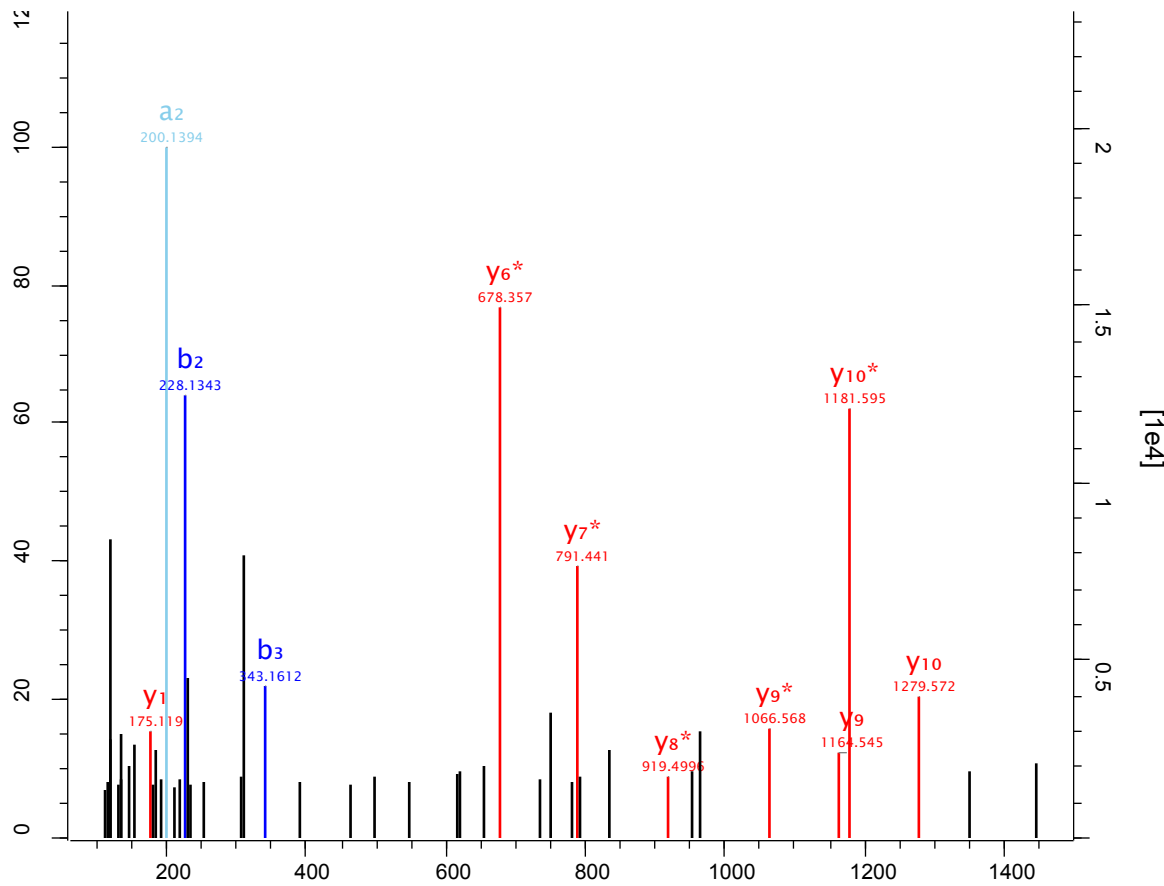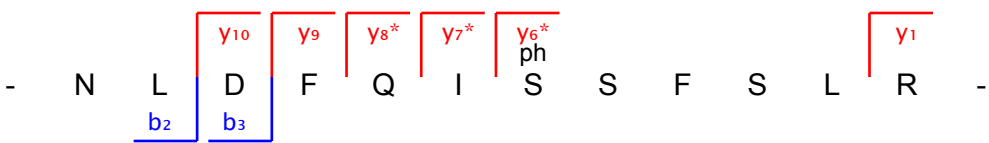

Raw file 2013\_COL15\_38\_45 Scan 3534 Method FTMS; HCD Score 152.06 m/z 563.24

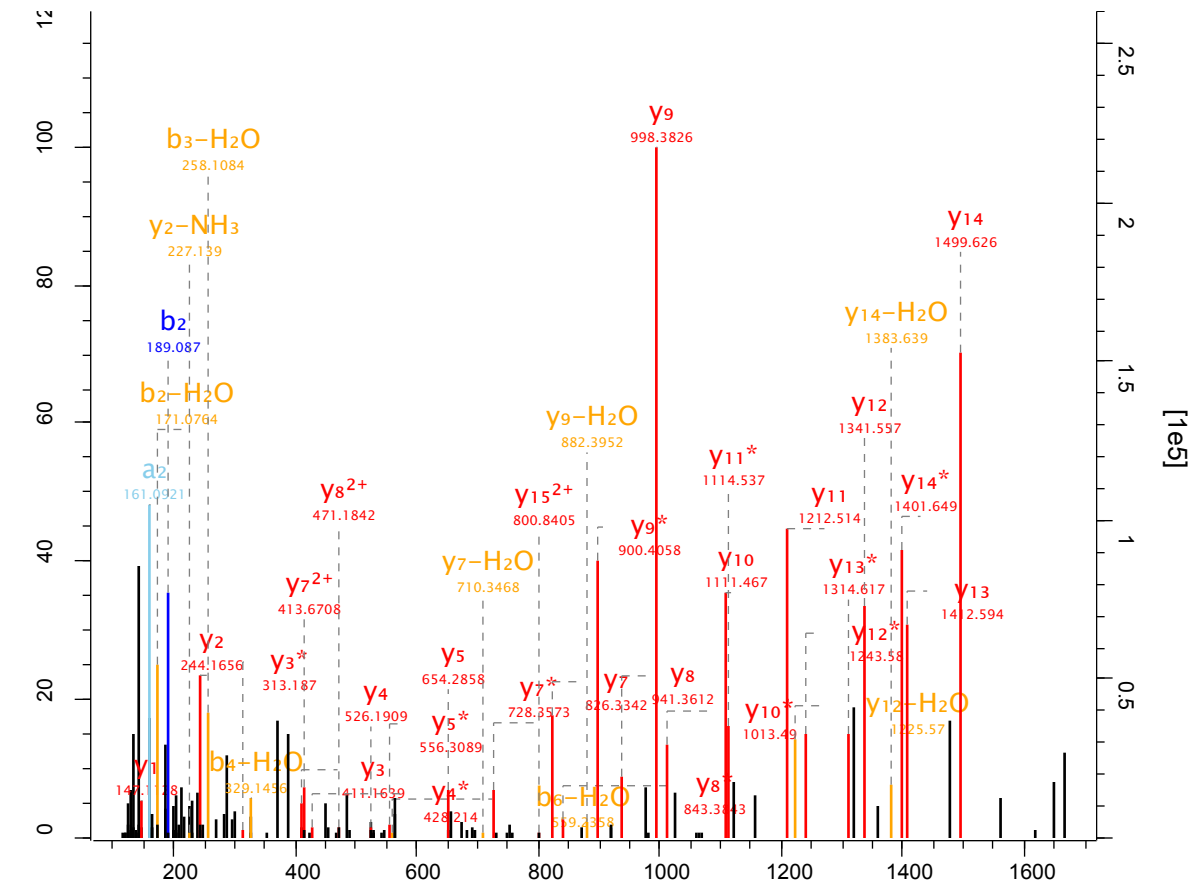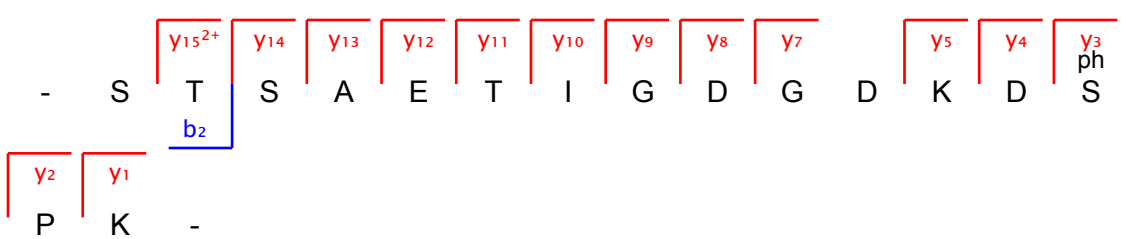

Raw file Scan Method Score m/z  
 2013\_COL15\_38\_45 35478 FTMS; HCD 65.9 687.3

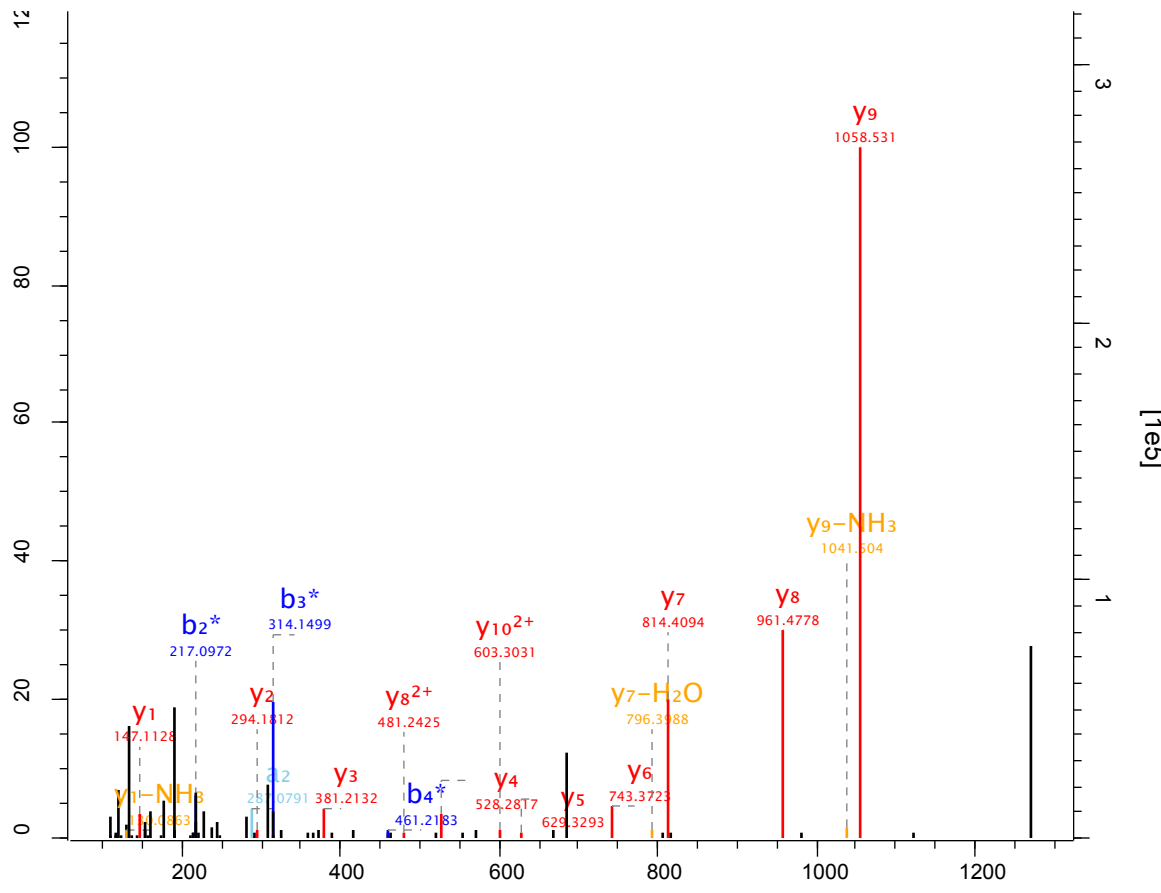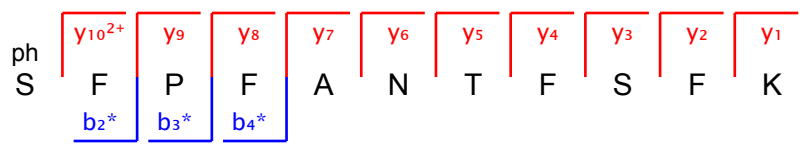



Raw file Scan Method Score m/z  
 2013\_COL15\_38\_45 35510 FTMS; HCD 95.44 930.76

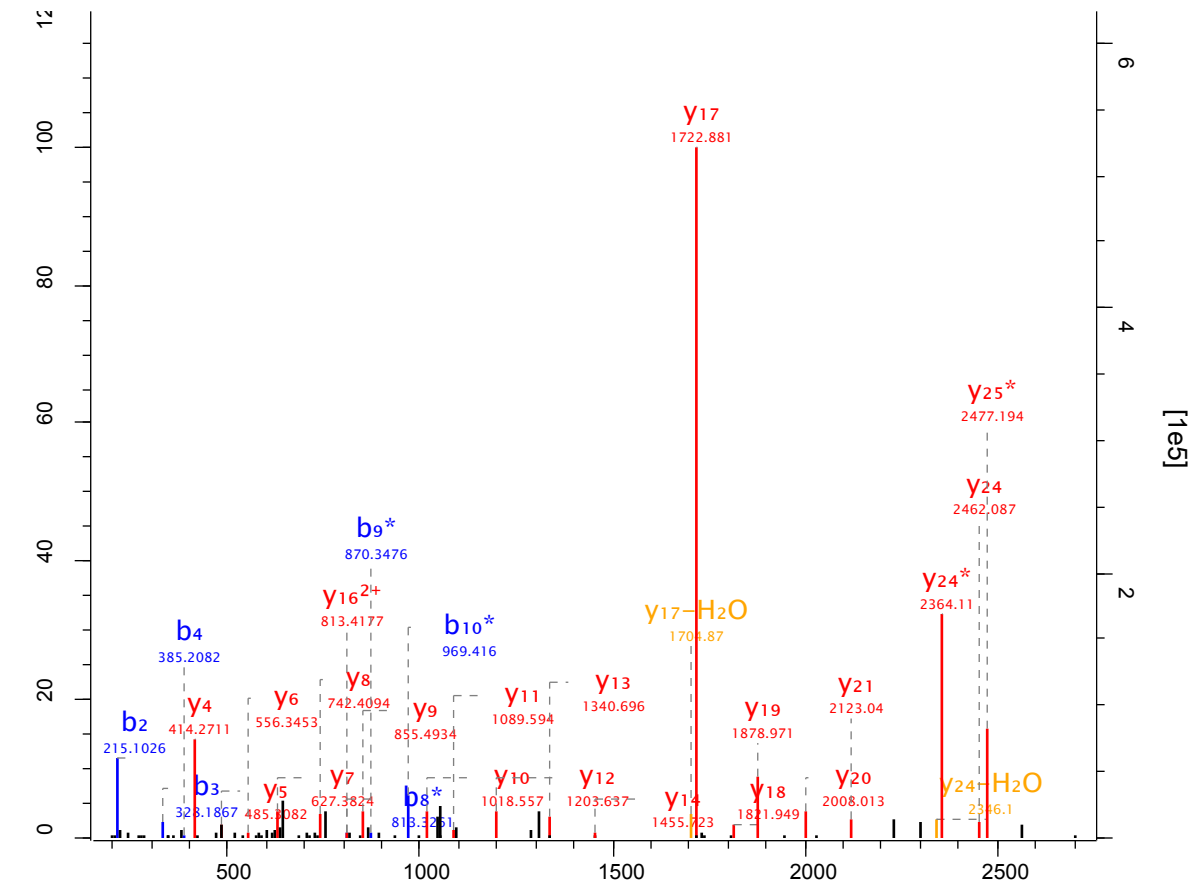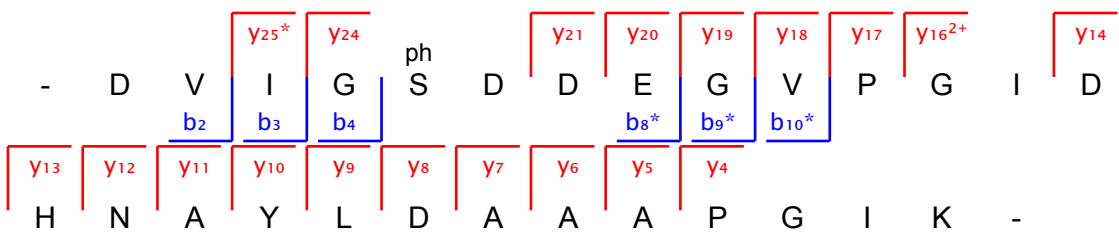

Raw file Scan Method Score m/z  
 2013\_COL15\_38\_45 35522 FTMS; HCD 67.83 1045.46

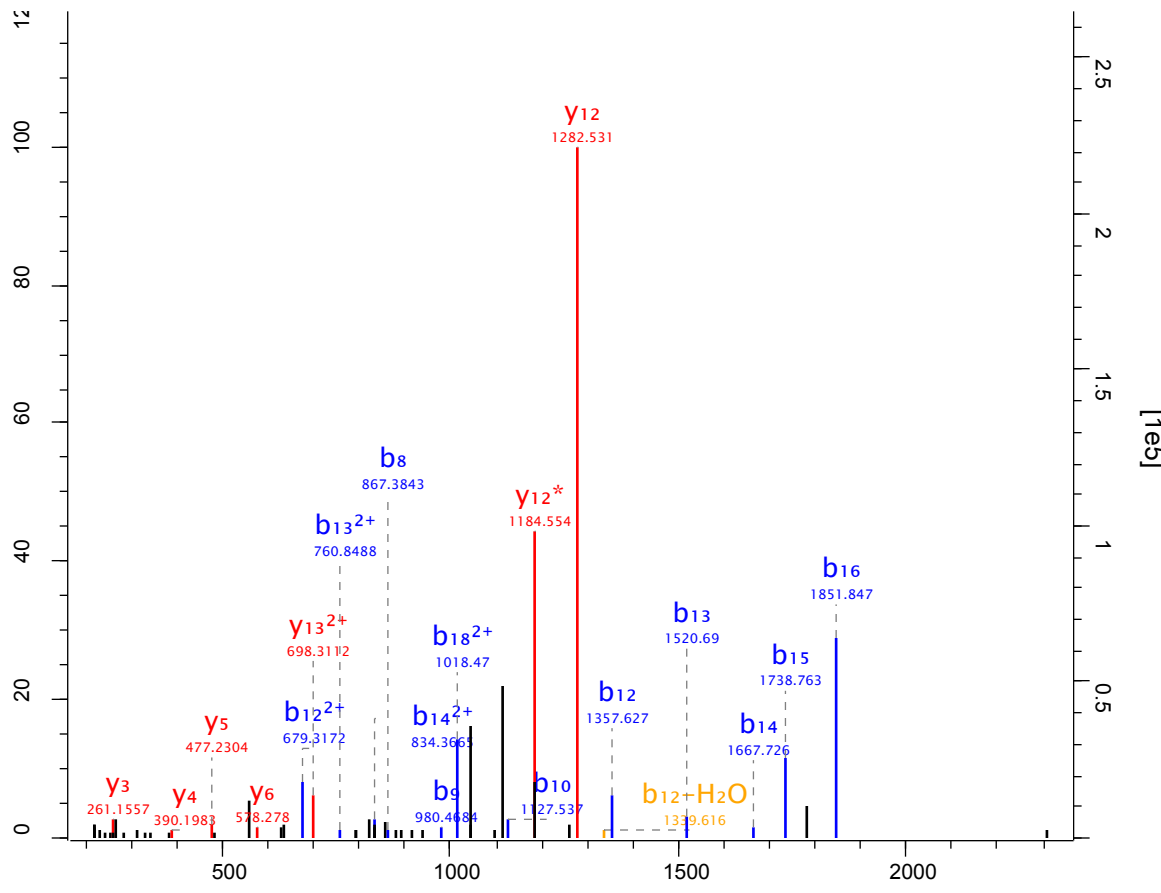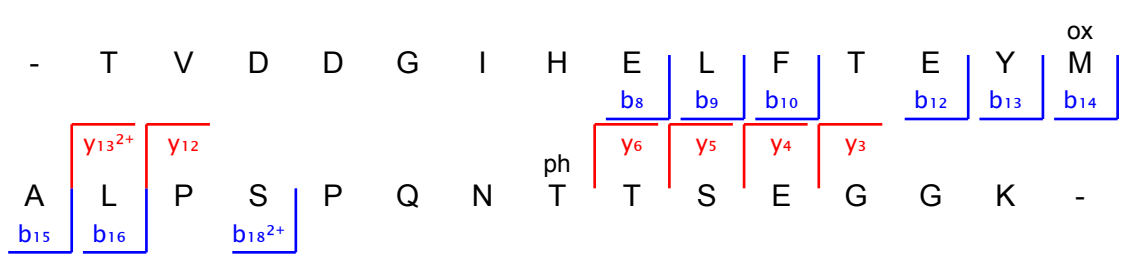

Raw file Scan Method Score m/z  
 2013\_COL15\_38\_45 35743 FTMS; HCD 66.83 732.81

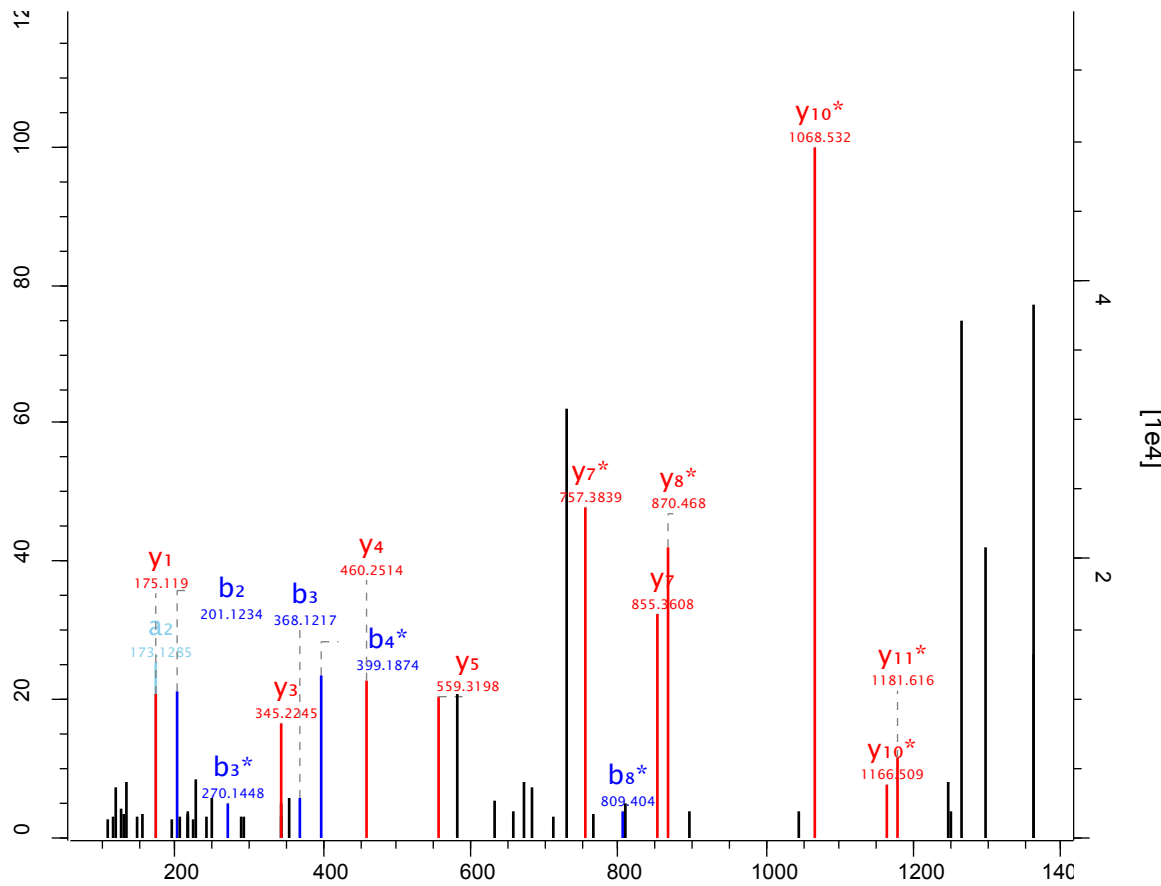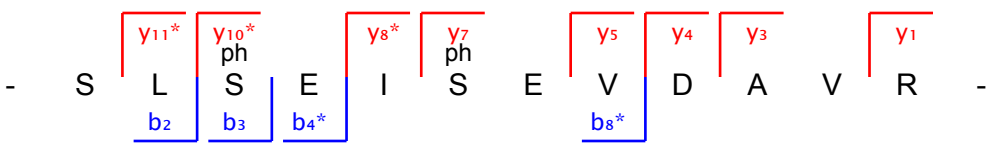

Raw file Scan Method Score m/z  
 2013\_COL15\_38\_45 3644 FTMS; HCD 117.83 713.28

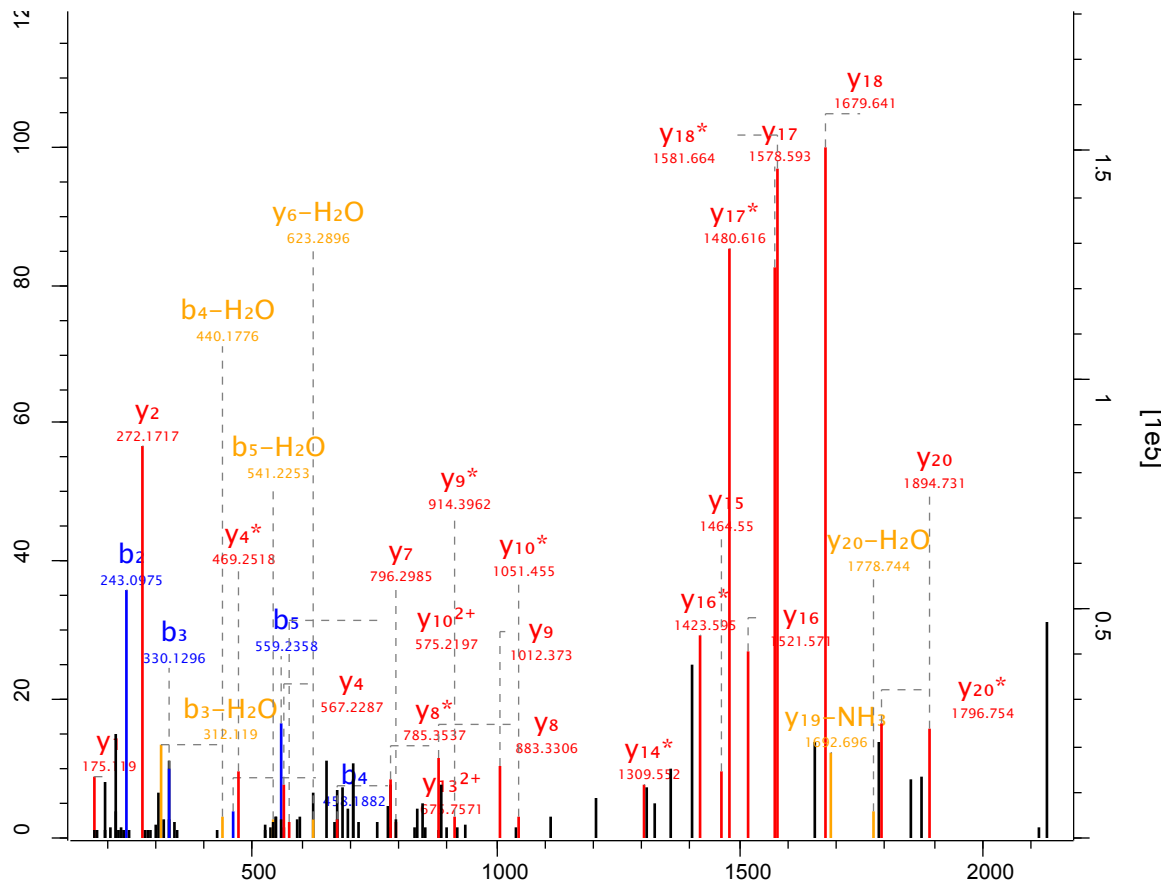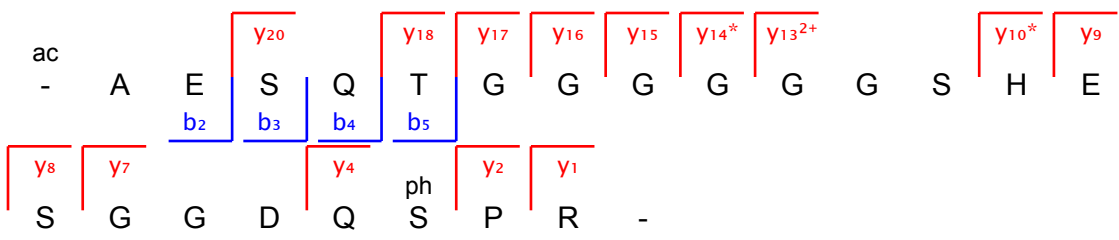

Raw file Scan Method Score m/z  
 2013\_COL15\_38\_45 36949 FTMS; HCD 61.61 739.08

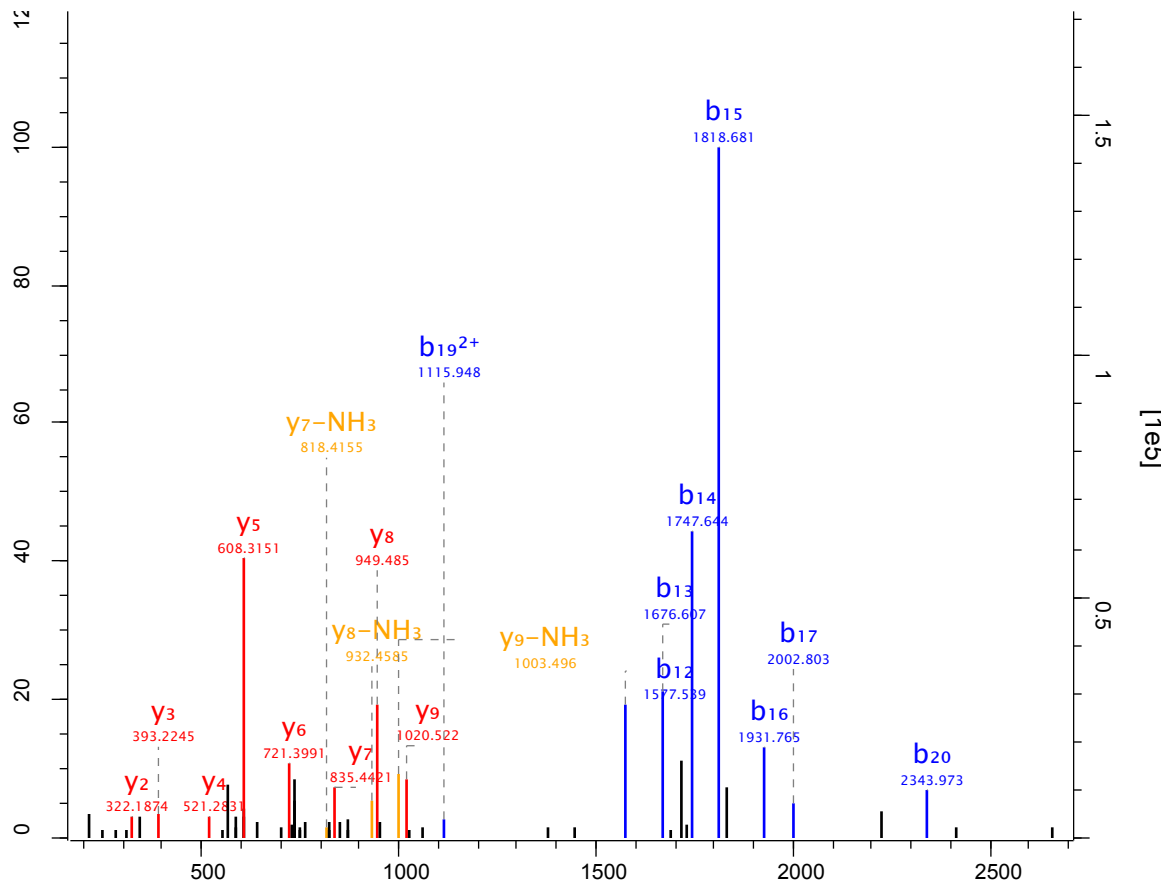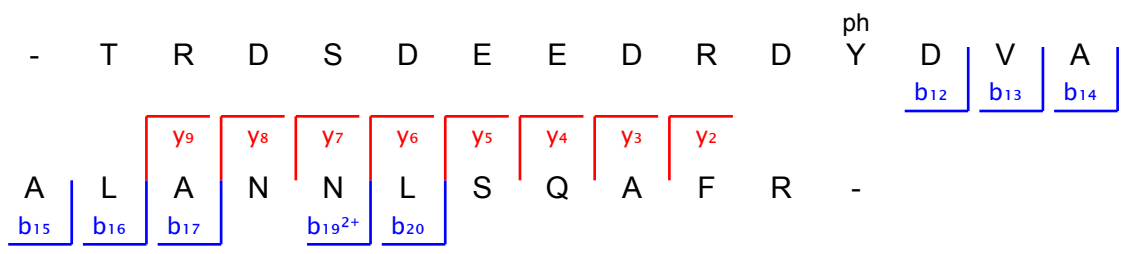

Raw file 2013\_COL15\_38\_45 Scan 37508 Method FTMS; HCD Score 230.29 m/z 711.28

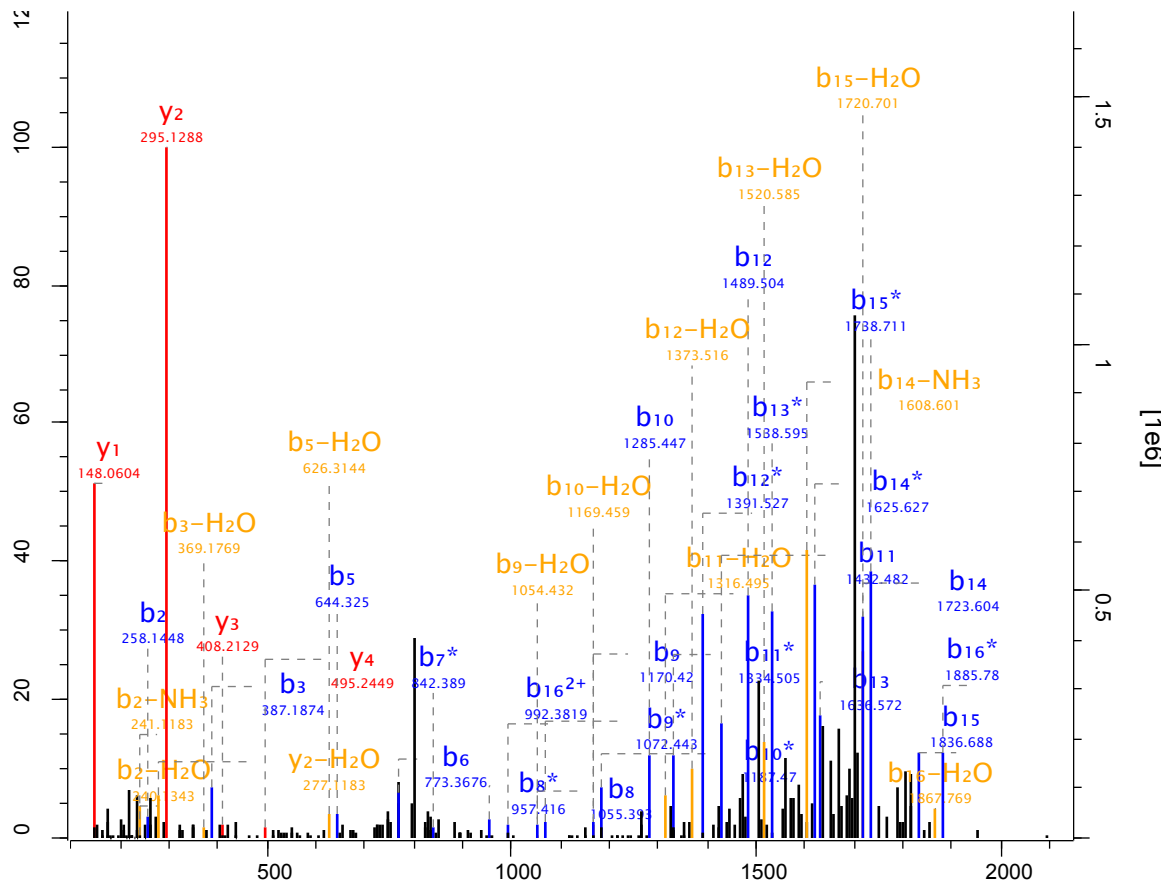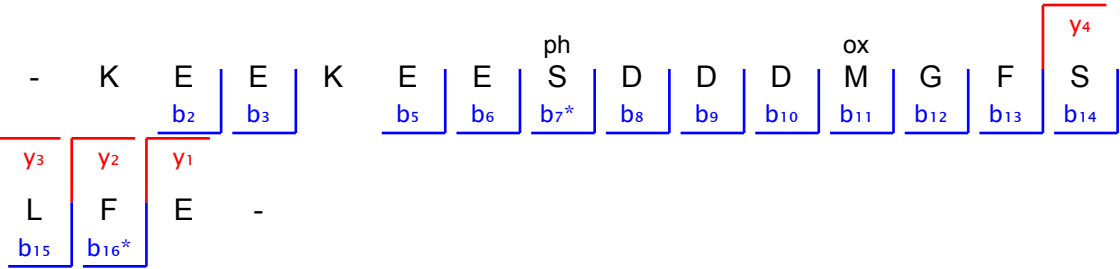

Raw file

2013\_COL15\_38\_45

Scan

3776

Method

FTMS; HCD

Score

43.03

m/z

437.2

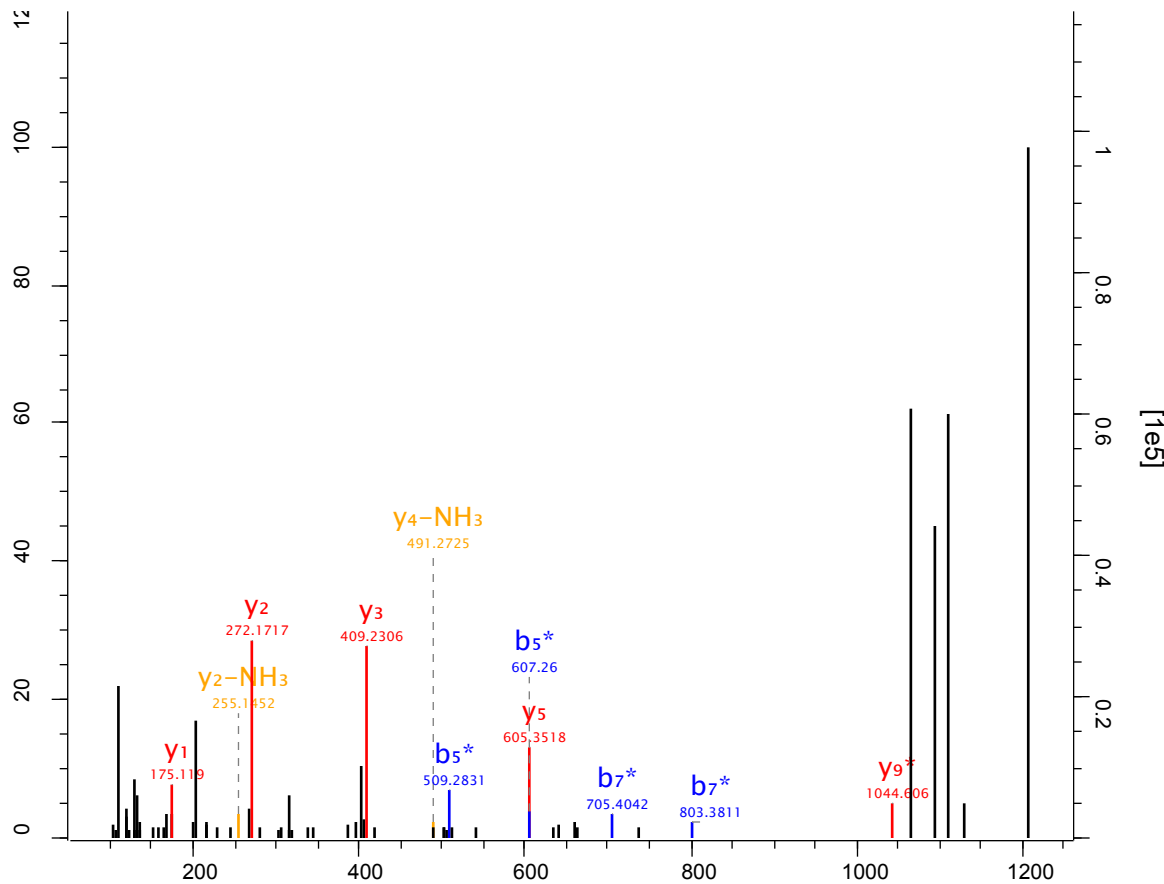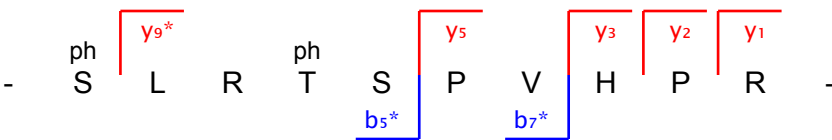

Raw file Scan Method Score m/z  
 2013\_COL15\_38\_45 3843 FTMS; HCD 56.12 552.59

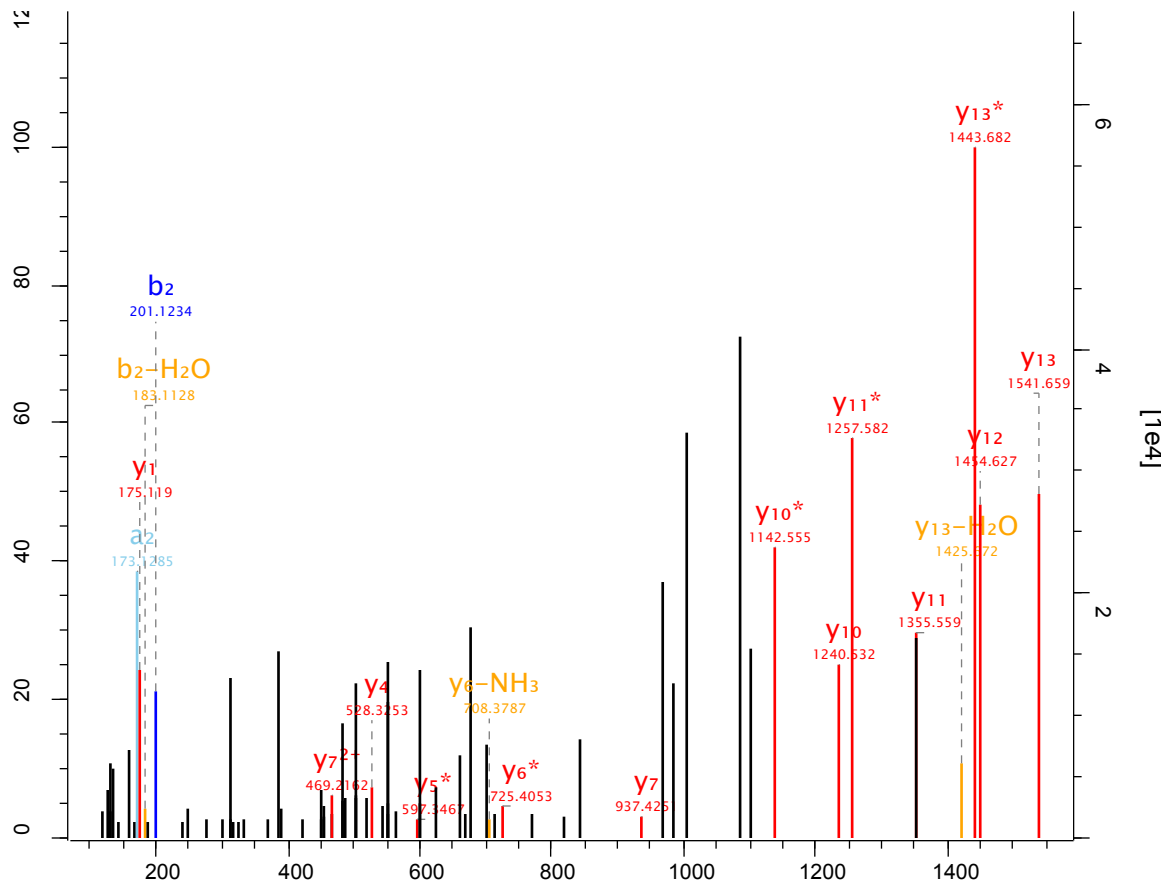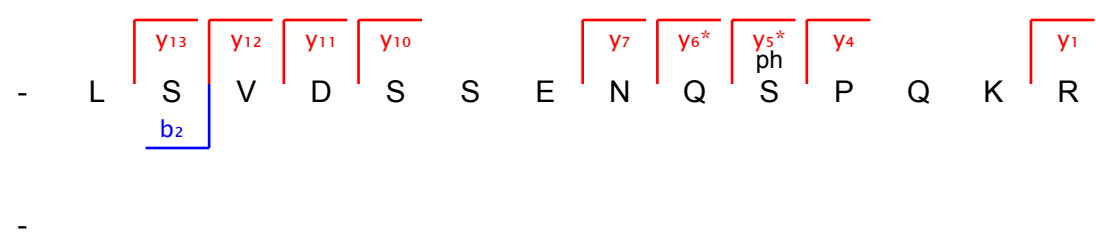



Raw file Scan Method Score m/z  
 2013\_COL15\_38\_45 39236 FTMS; HCD 87.13 992.95

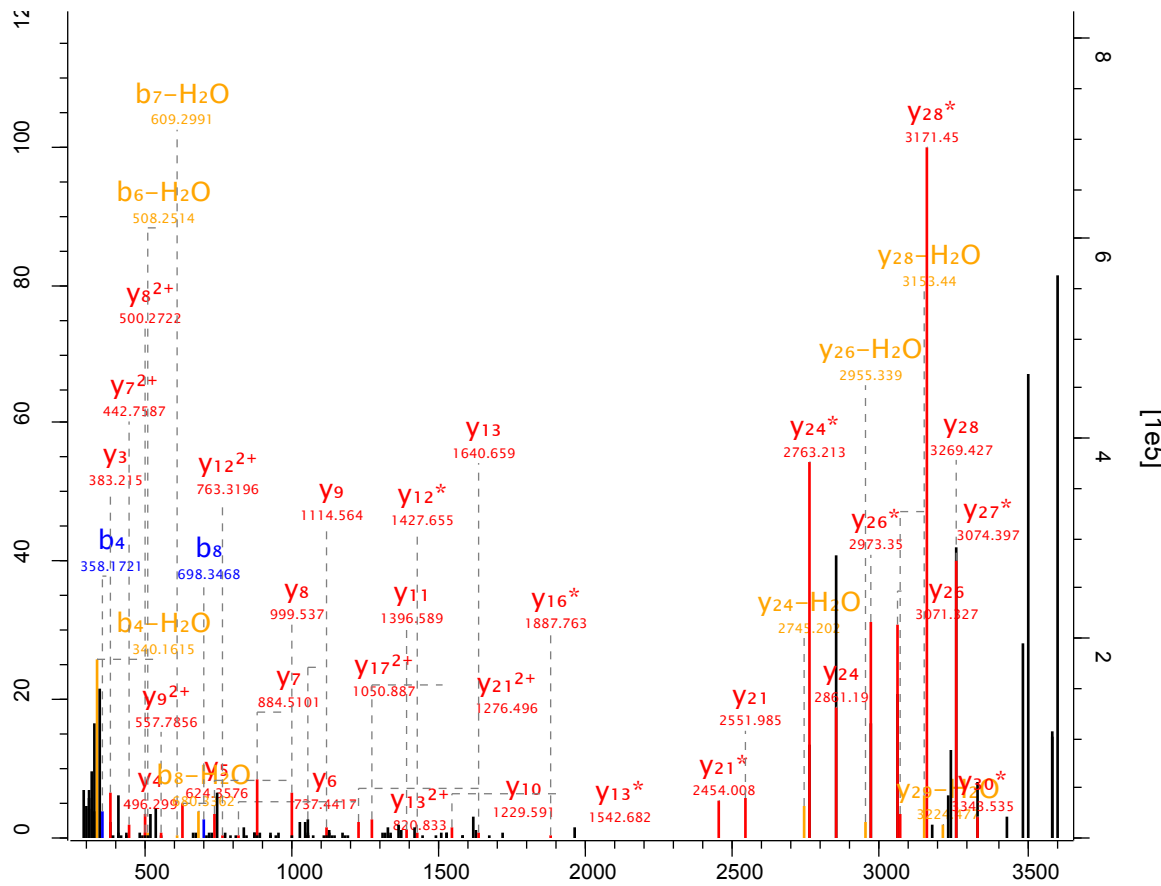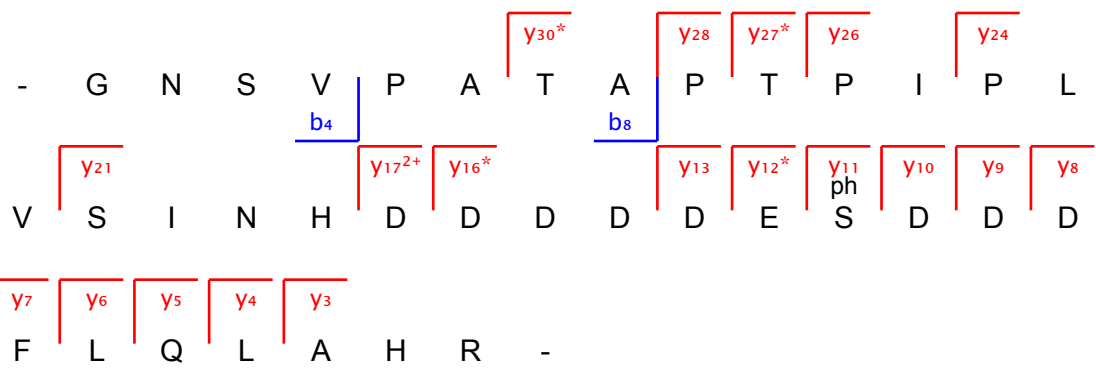

Raw file Scan Method Score m/z  
 2013\_COL15\_38\_45 3934 FTMS; HCD 124.42 548.76

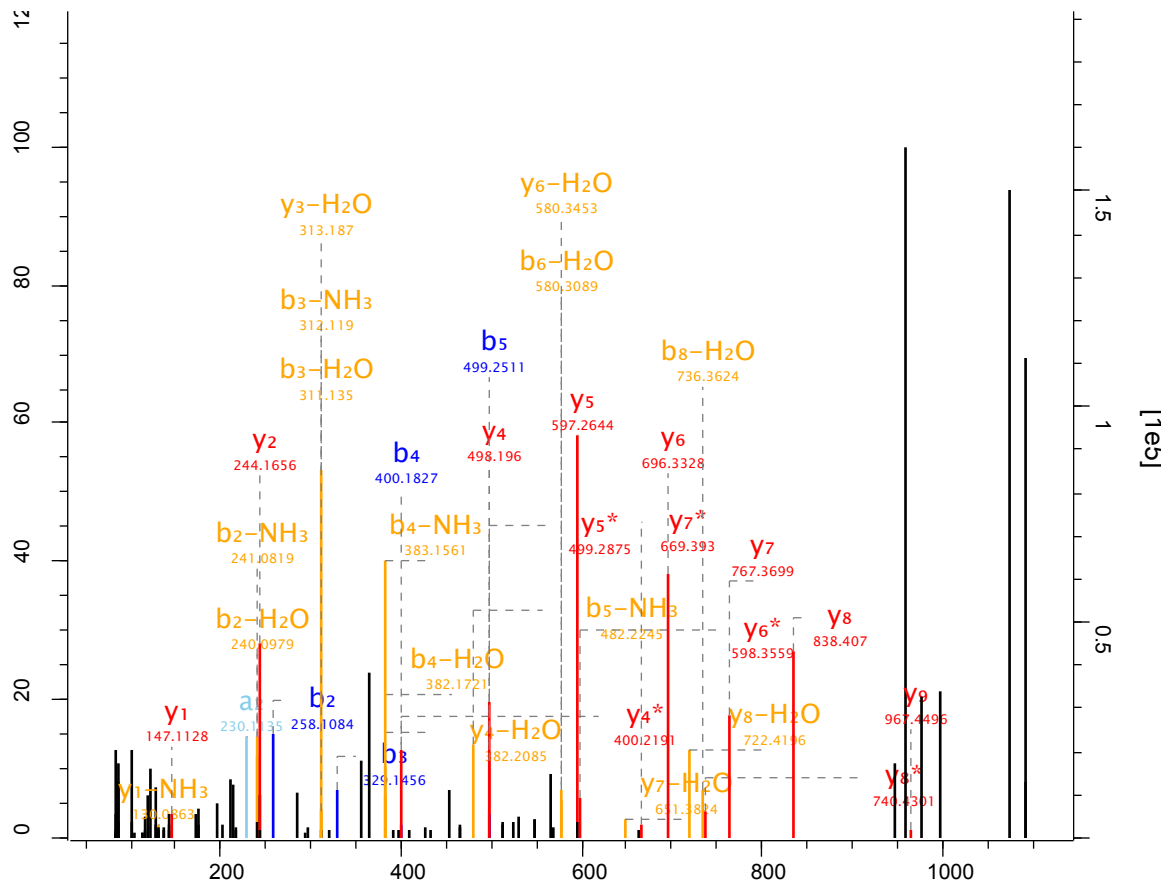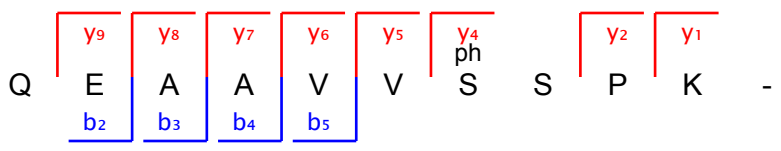



Raw file 2013\_COL15\_38\_45 Scan 39505 Method FTMS; HCD Score 230.42 m/z 696.77

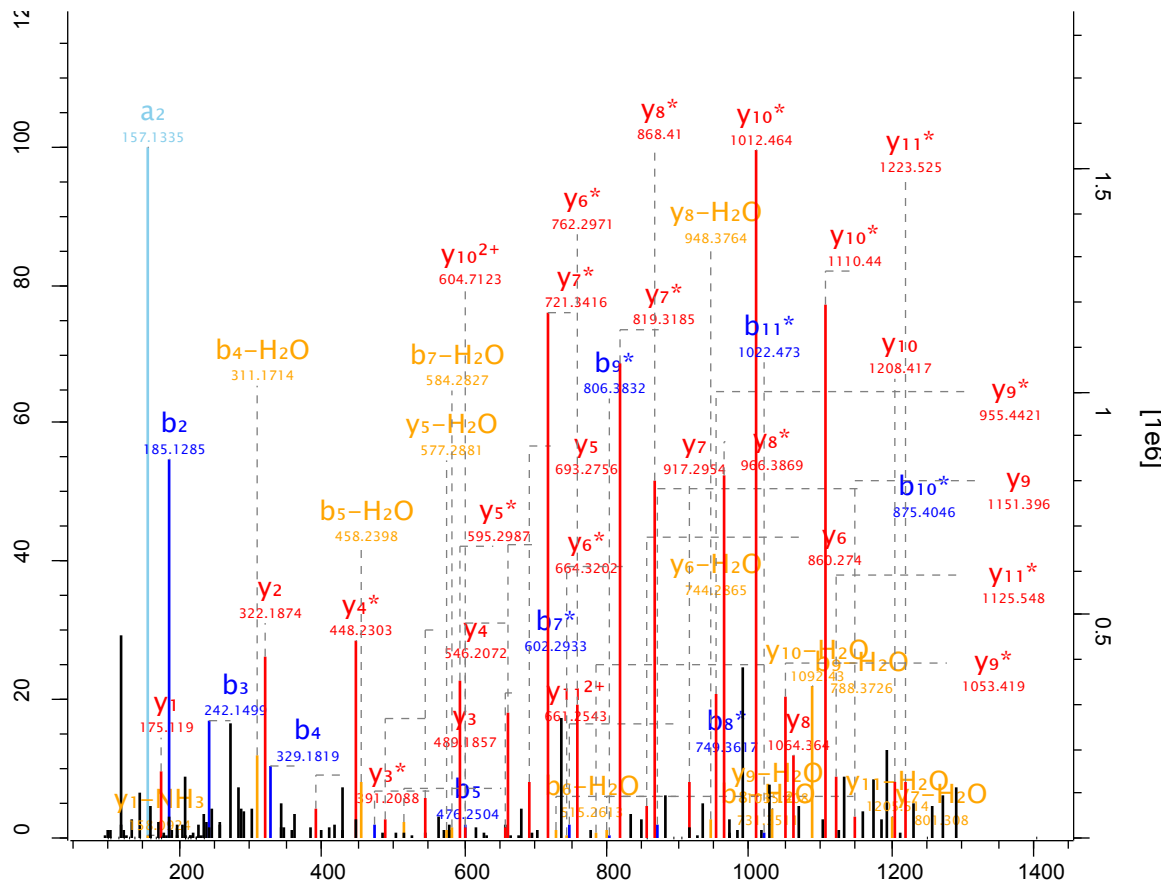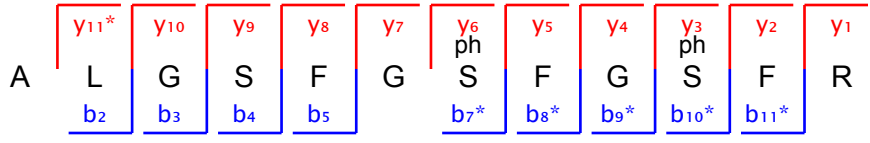

Raw file Scan Method Score m/z  
 2013\_COL15\_38\_45 39508 FTMS; HCD 130.05 1083.48

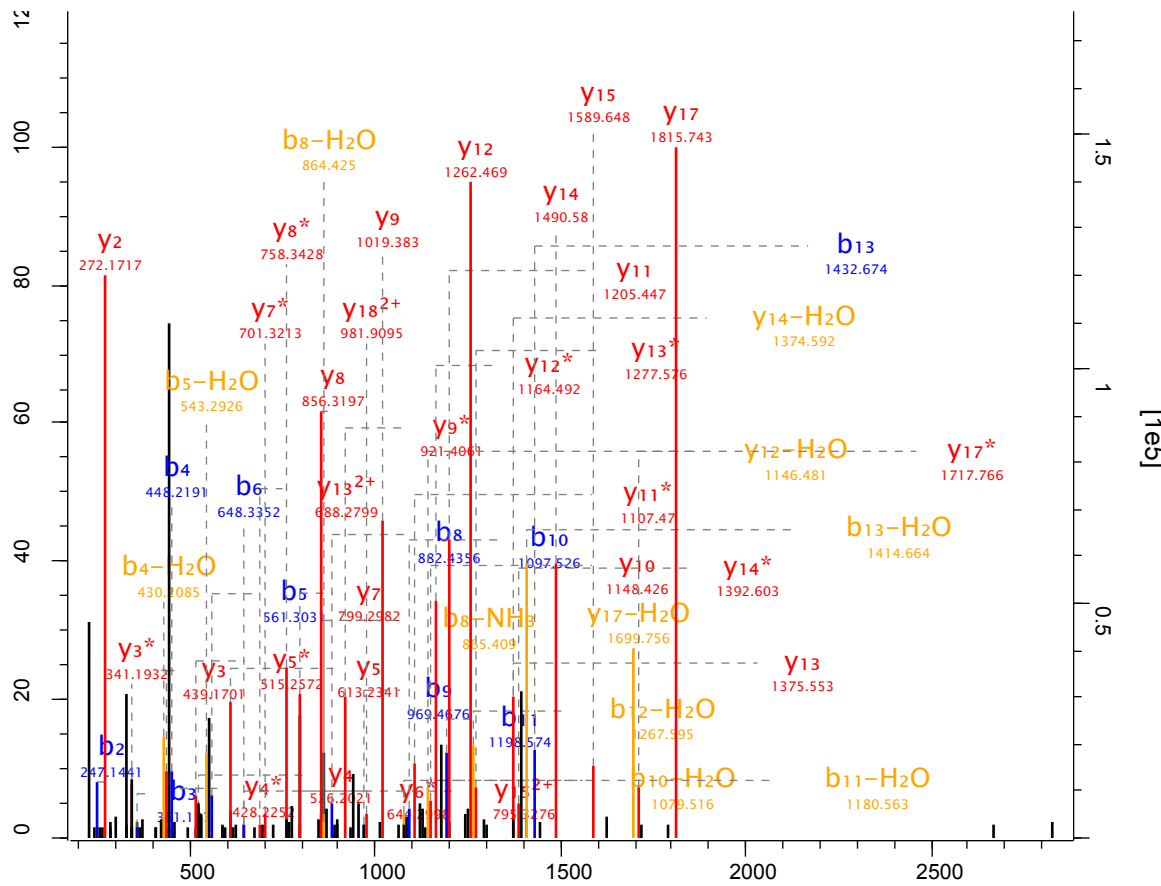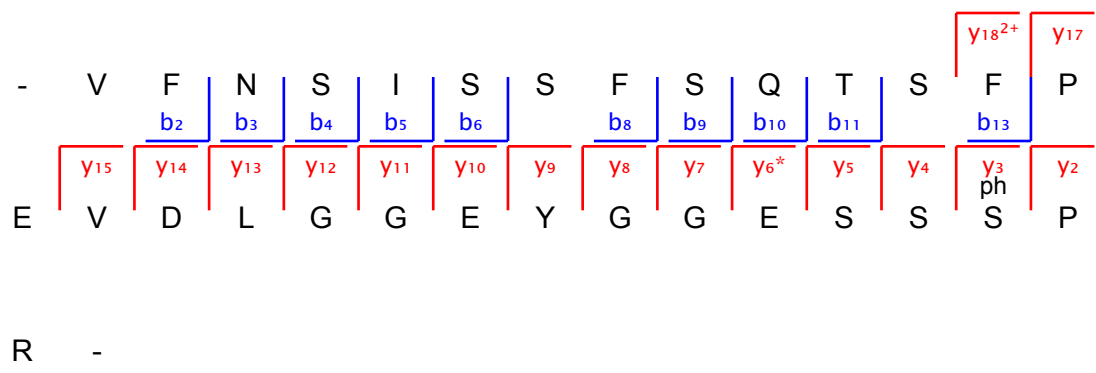

R -

Raw file Scan Method Score m/z  
 2013\_COL15\_38\_45 3961 FTMS; HCD 82.15 588.27

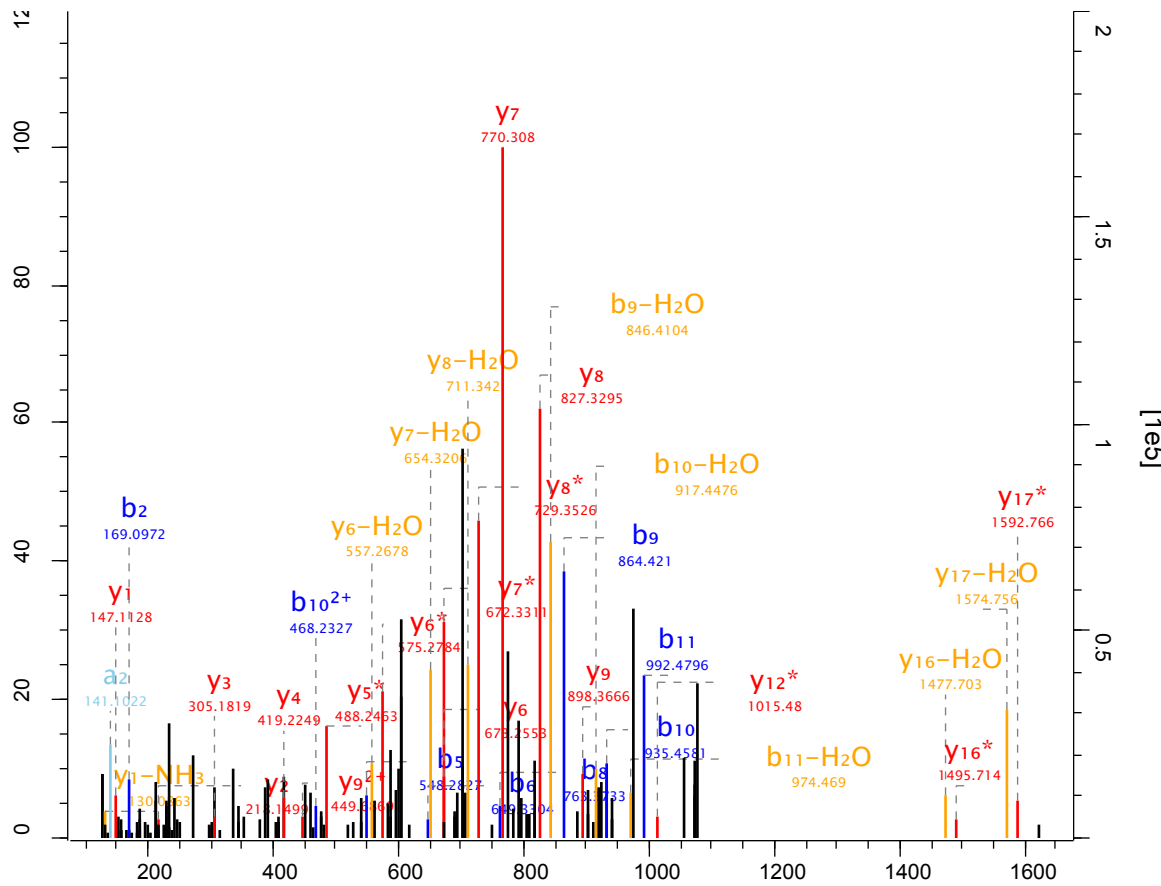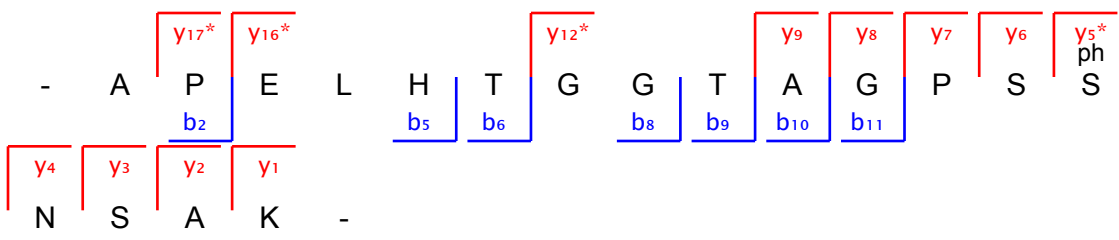

Raw file Scan Method Score m/z  
 2013\_COL15\_38\_45 40046 FTMS; HCD 90.39 786.35

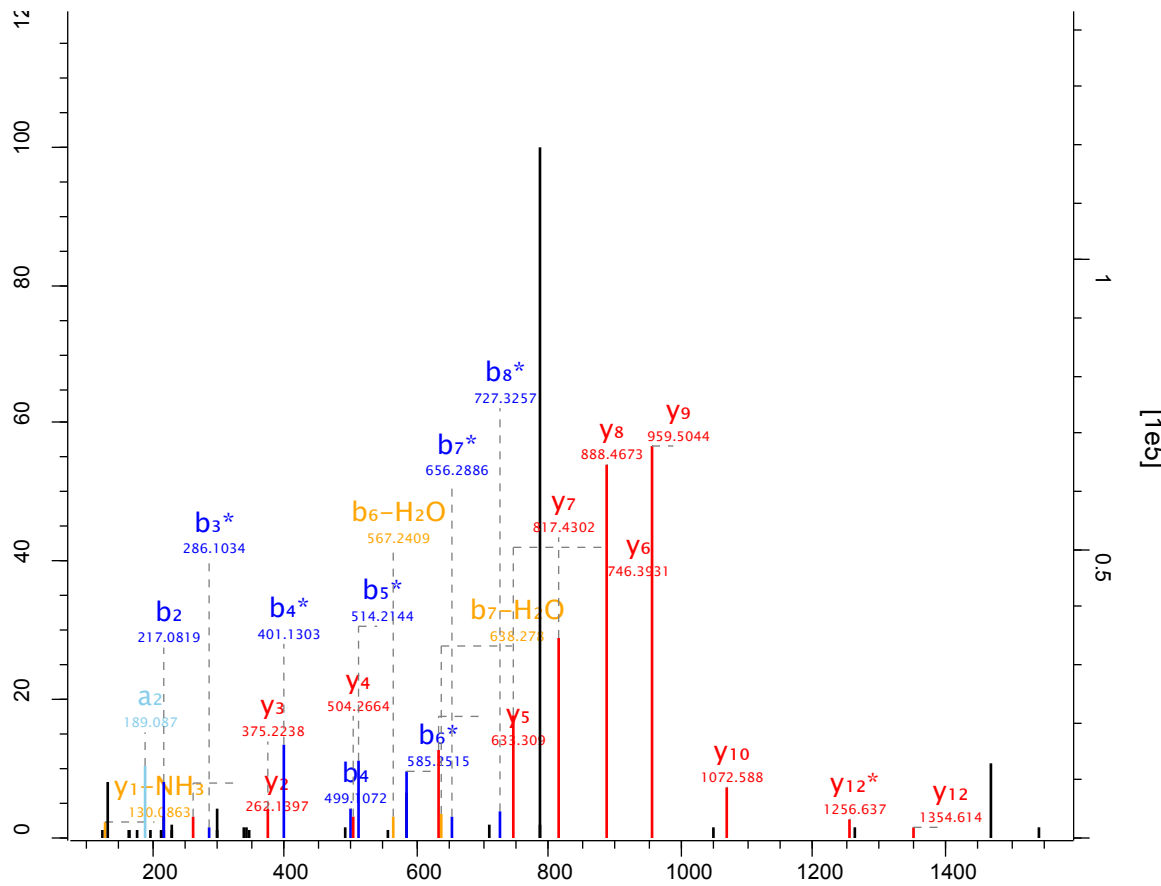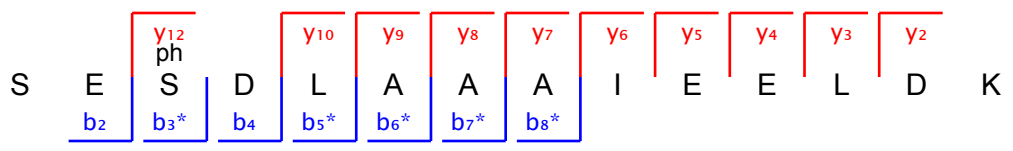

Raw file Scan Method Score m/z  
 2013\_COL15\_38\_45 4009 FTMS; HCD 107.15 605.26

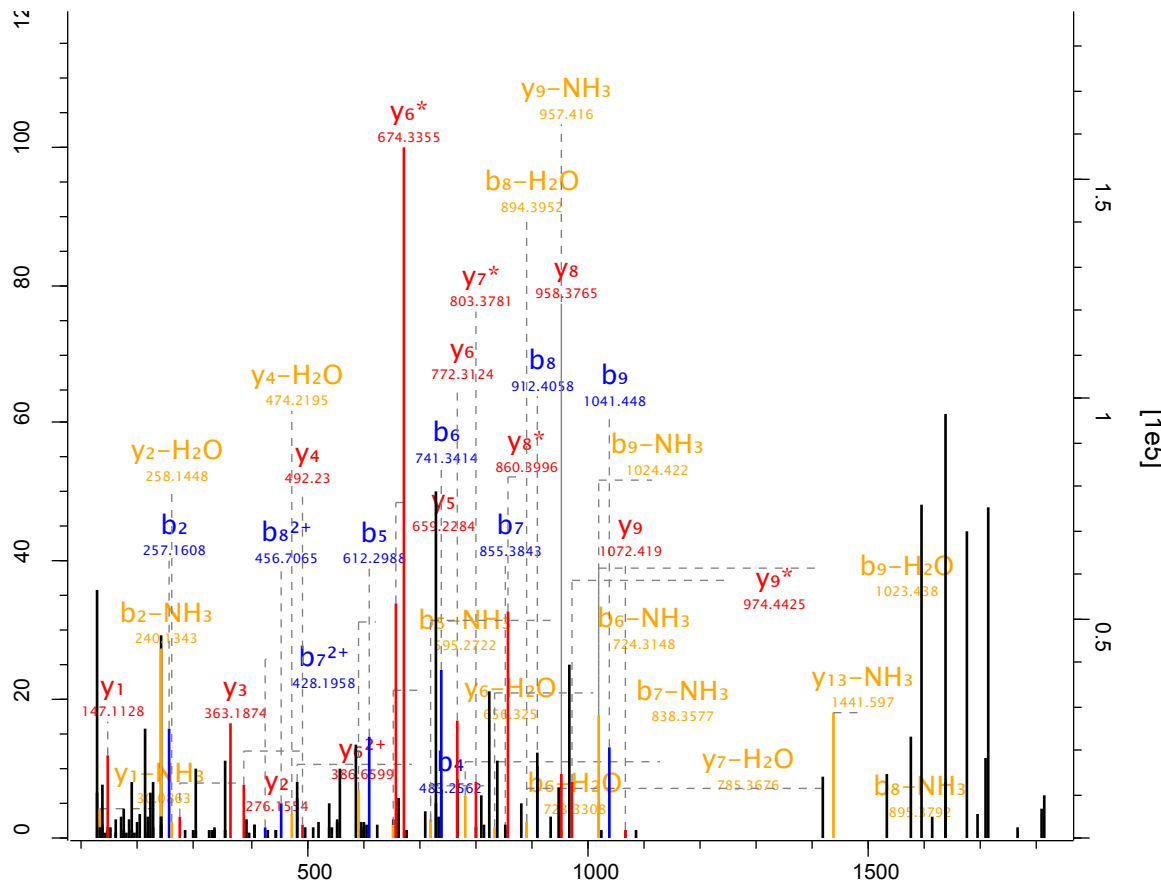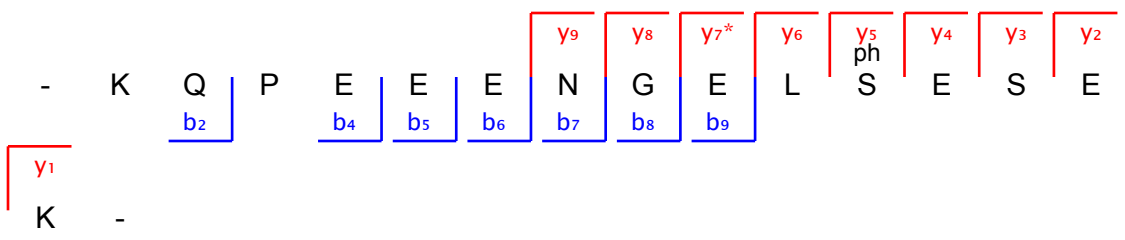



Raw file Scan Method Score m/z  
 2013\_COL15\_38\_45 40463 FTMS; HCD 84.15 950.81

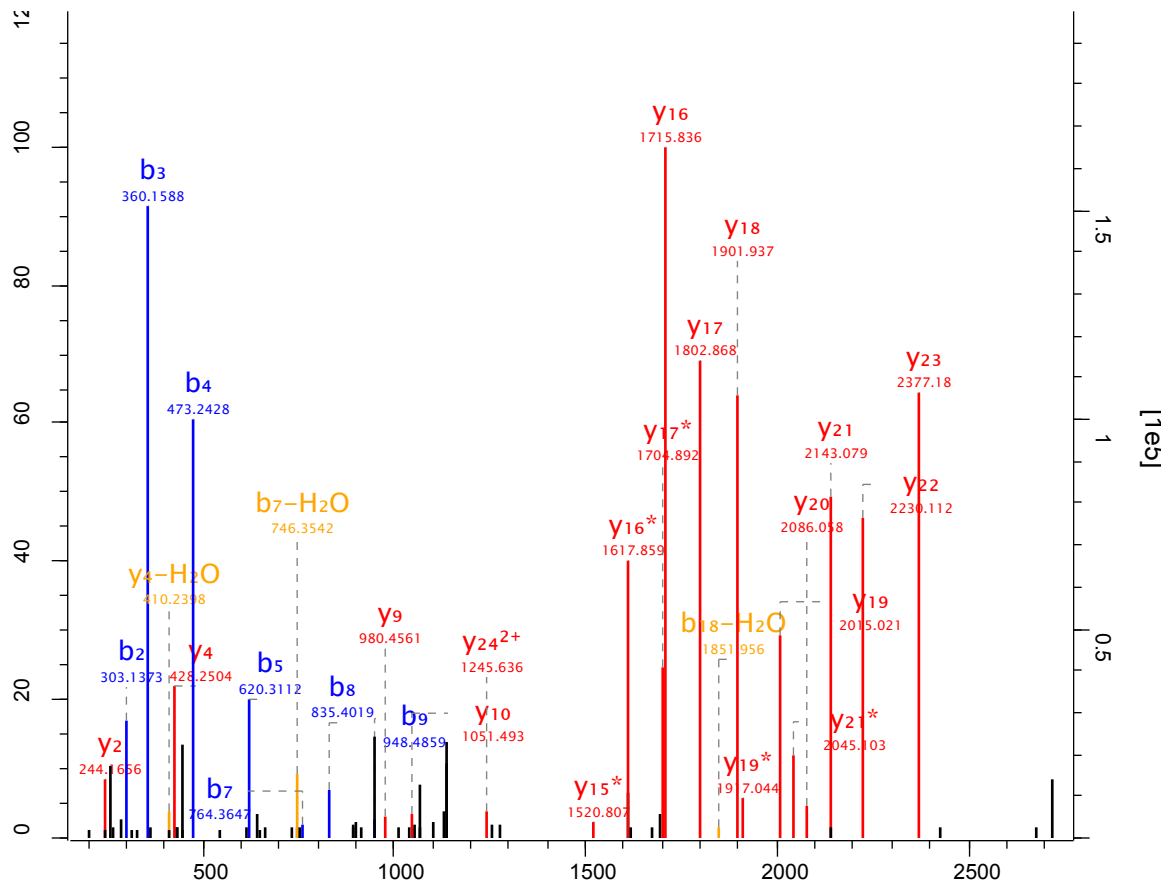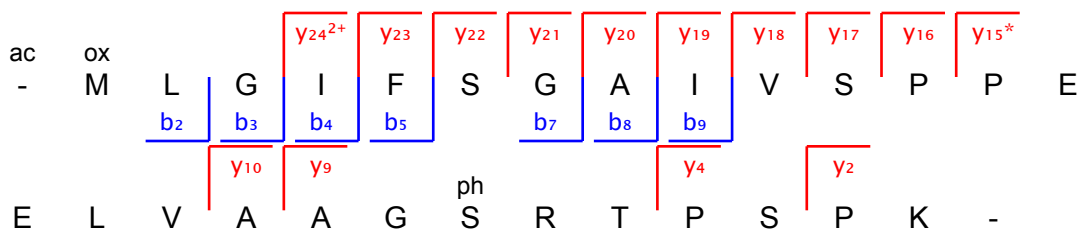

Raw file Scan Method Score m/z  
 2013\_COL15\_38\_45 40644 FTMS; HCD 41.35 906.39

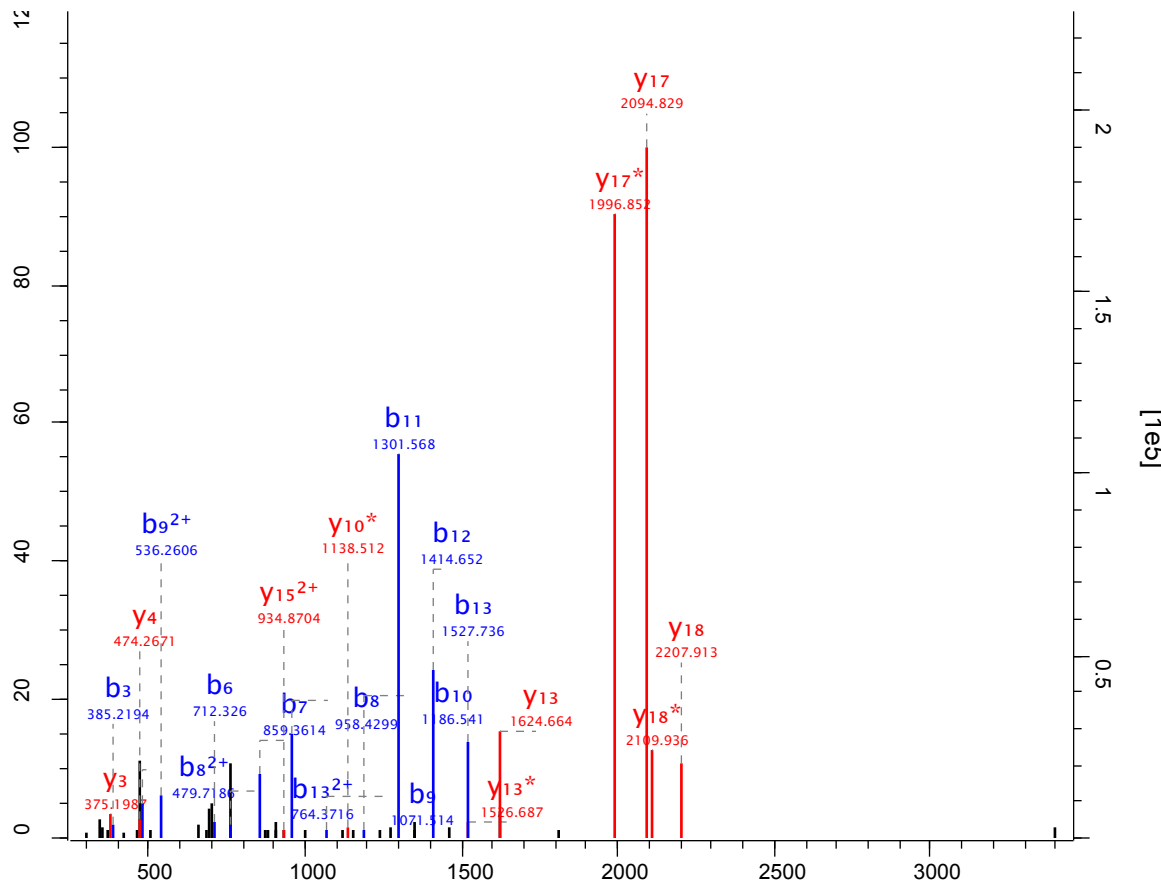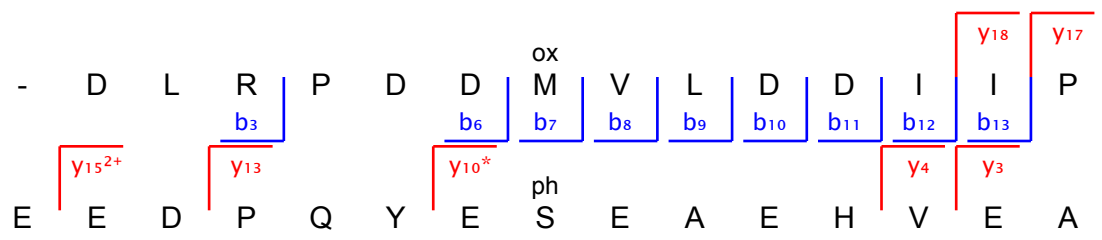

R -

Raw file Scan Method Score m/z  
 2013\_COL15\_38\_45 41292 FTMS; HCD 96 972.48

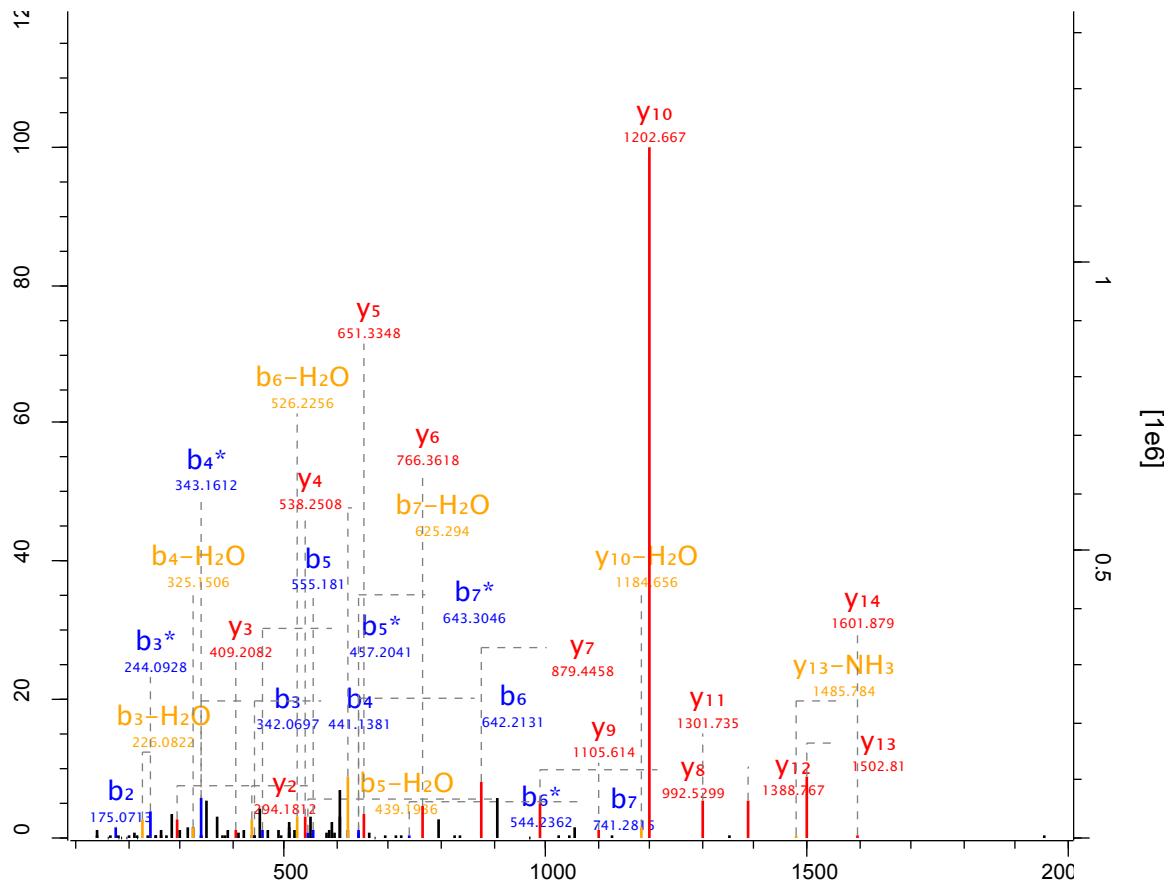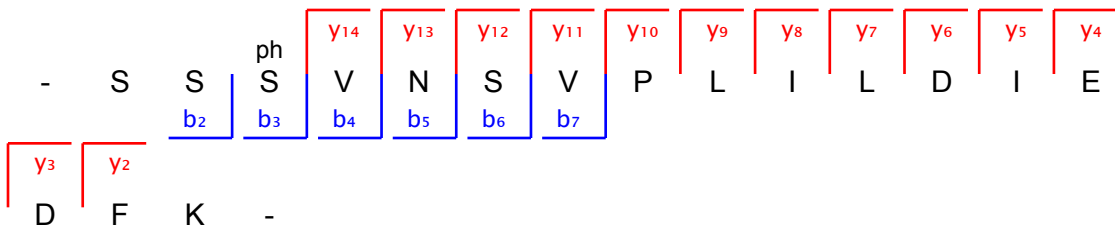

Raw file Scan Method Score m/z  
2013\_COL15\_38\_45 41585 FTMS; HCD 84.36 1080.46

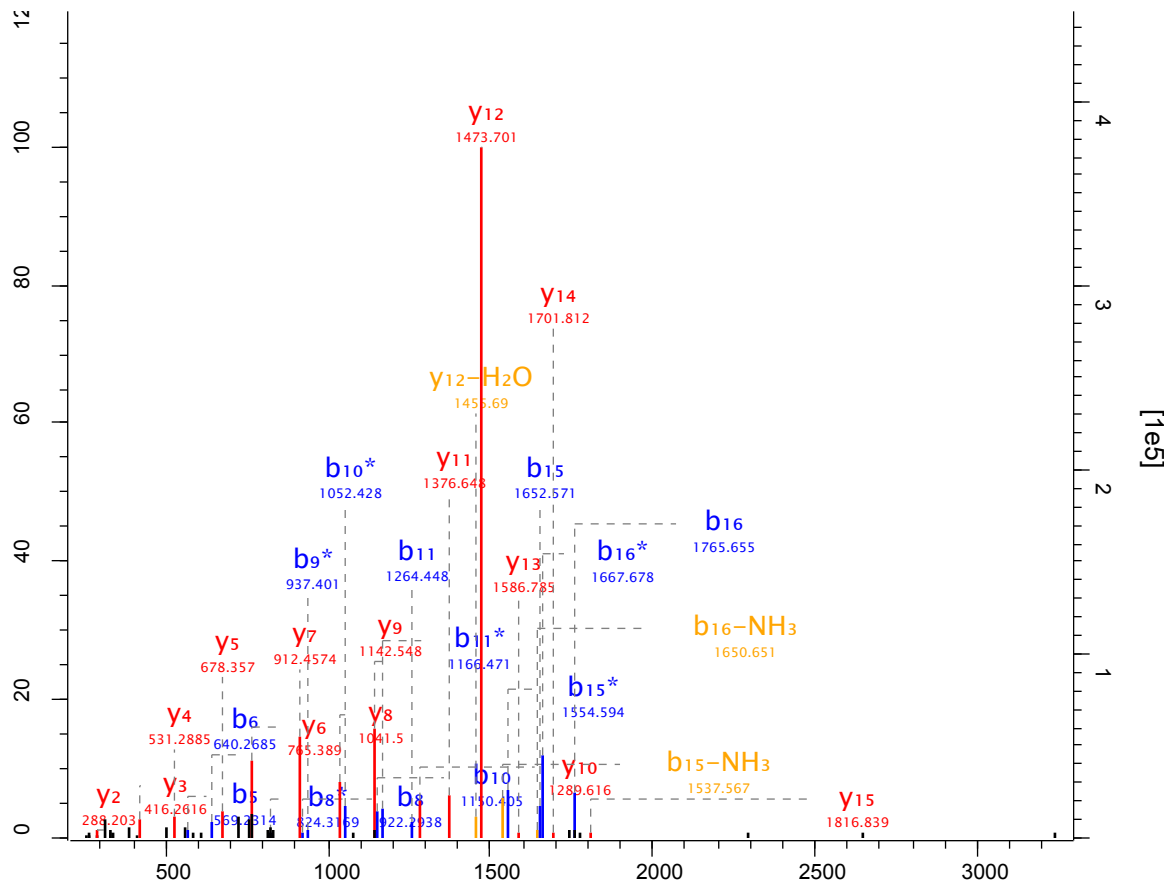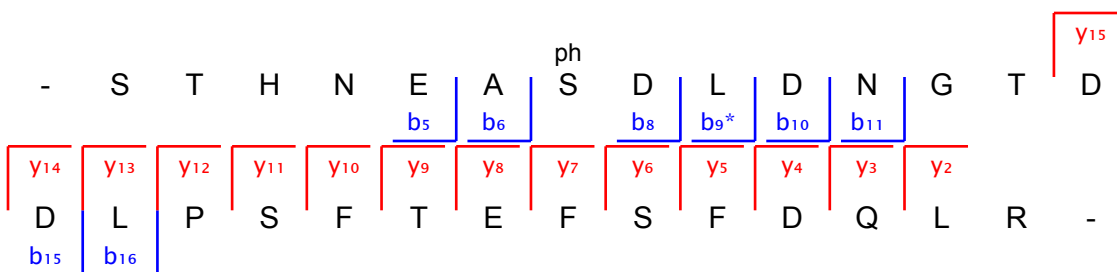

Raw file 2013\_COL15\_38\_45 Scan 42566 Method FTMS; HCD Score 226.71 m/z 849.34

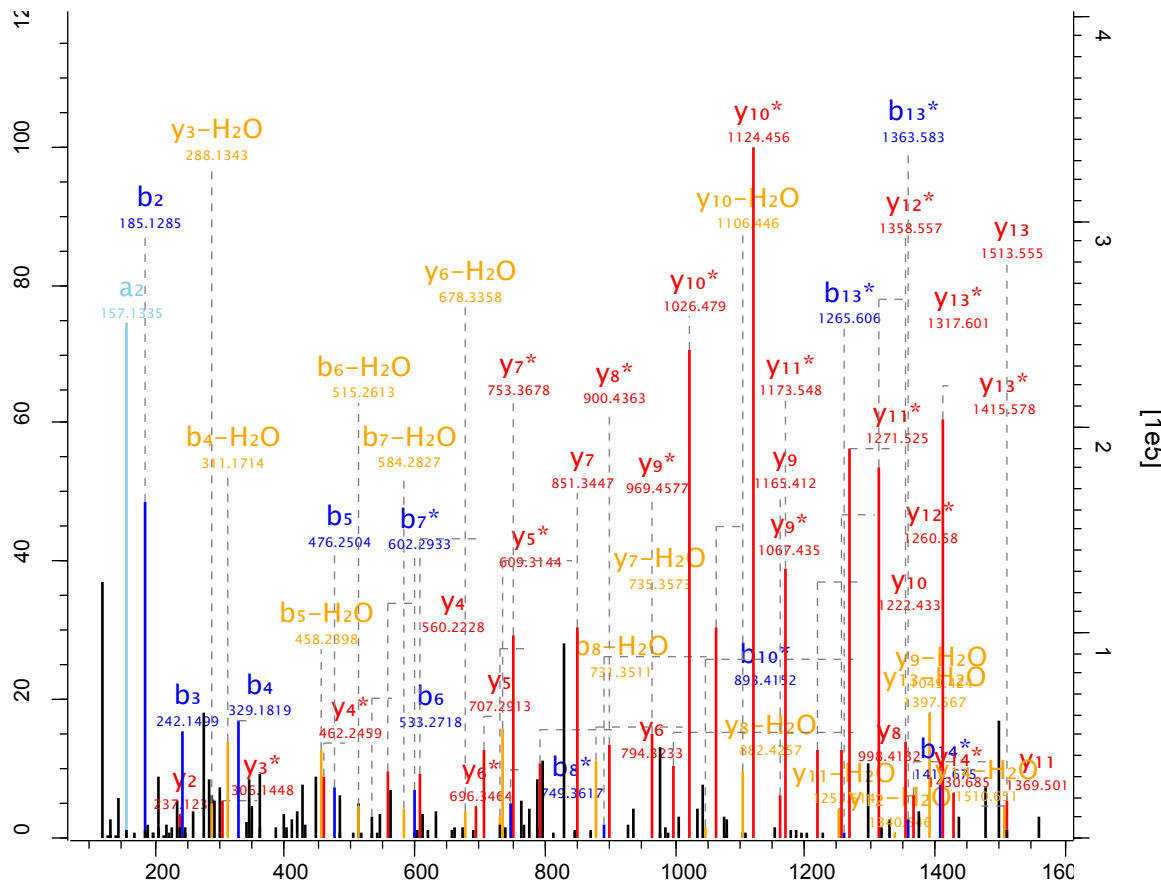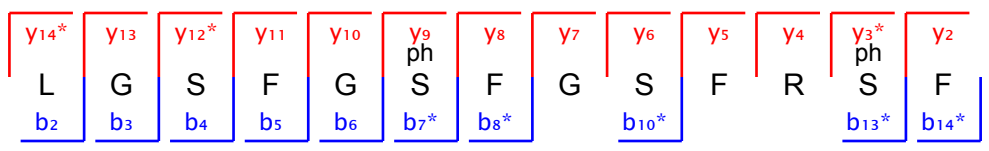

A -

Raw file 2013\_COL15\_38\_45 Scan 4401 Method FTMS; HCD Score 69.77 m/z 659.62

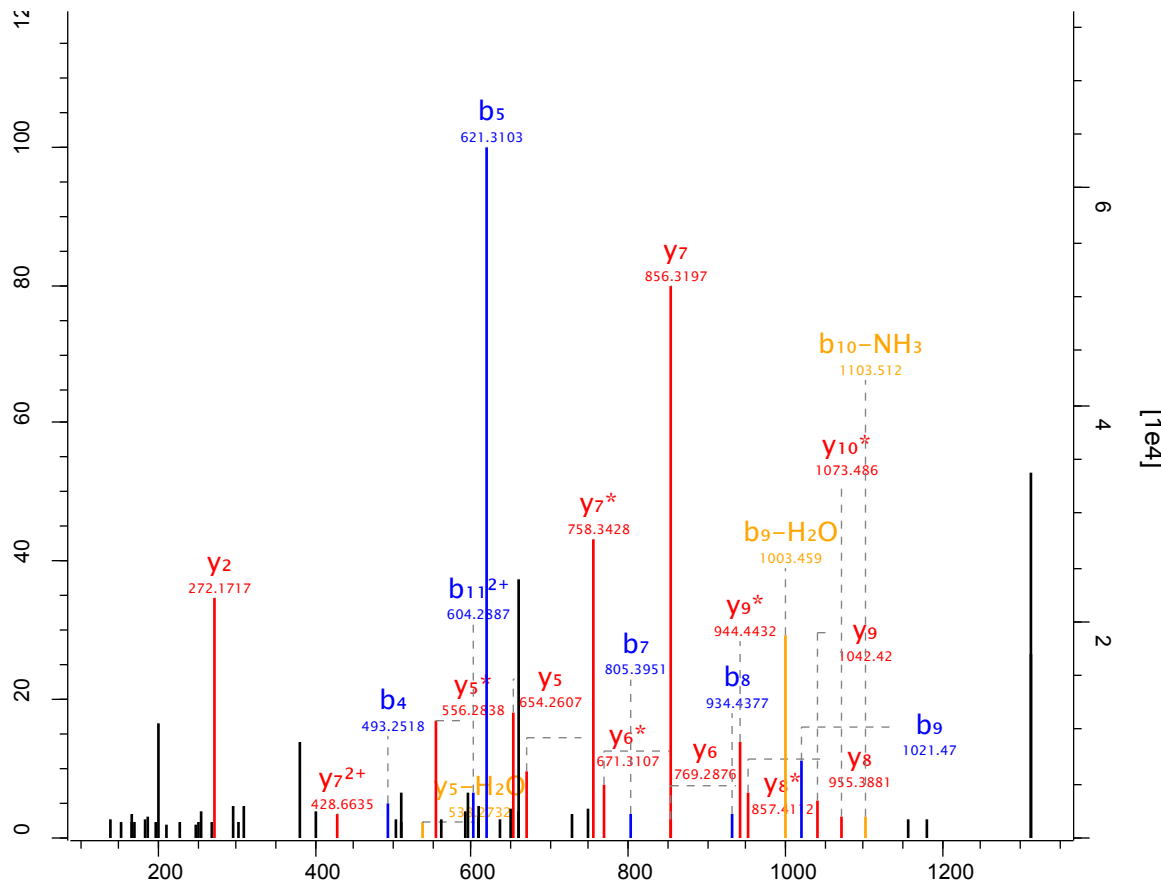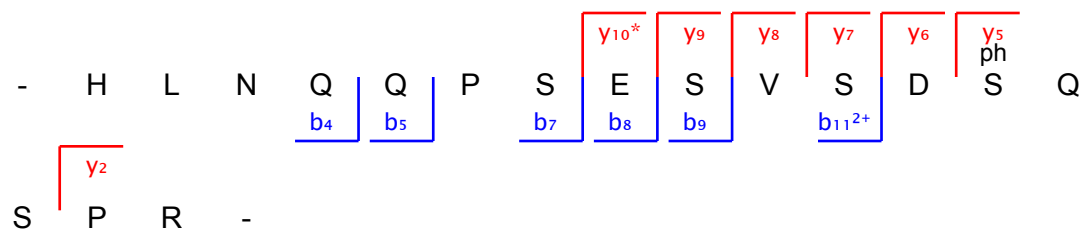

Raw file Scan Method Score m/z  
 2013\_COL15\_38\_45 4482 FTMS; HCD 61.28 577.91

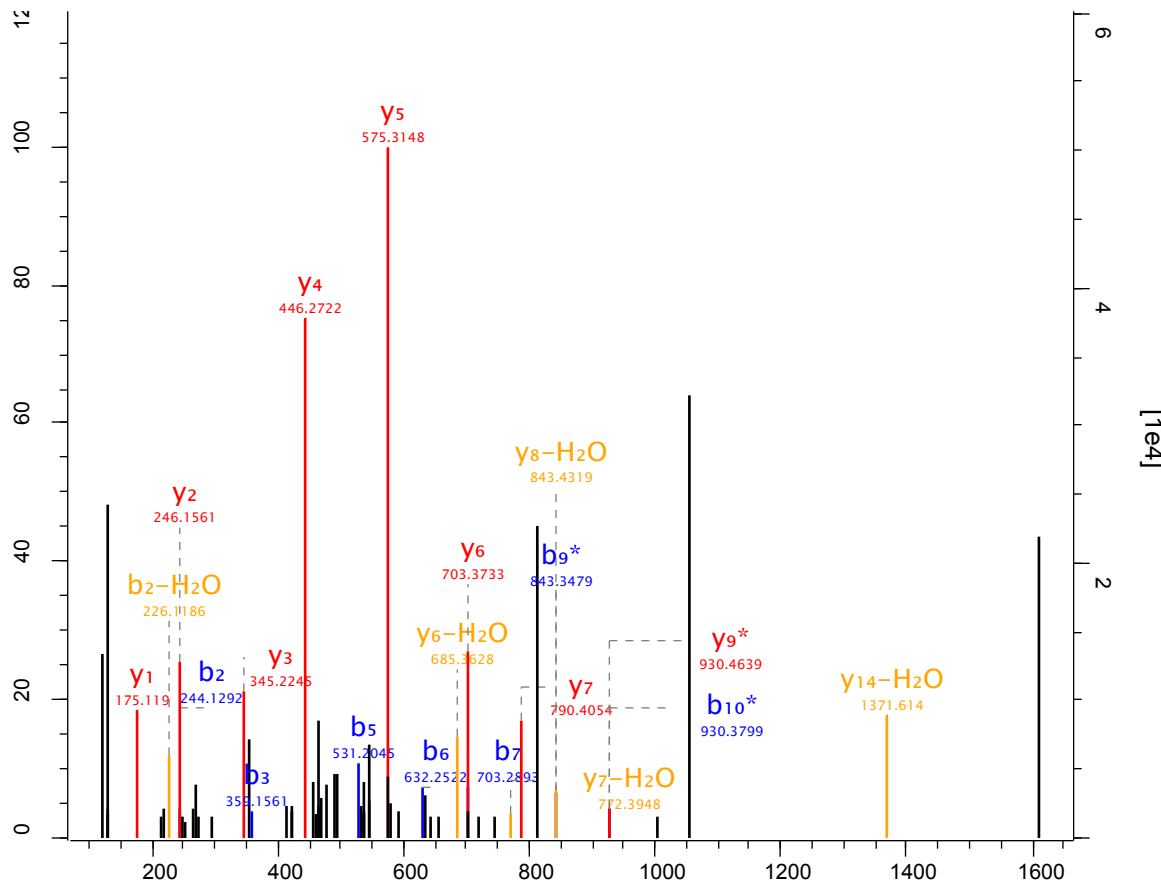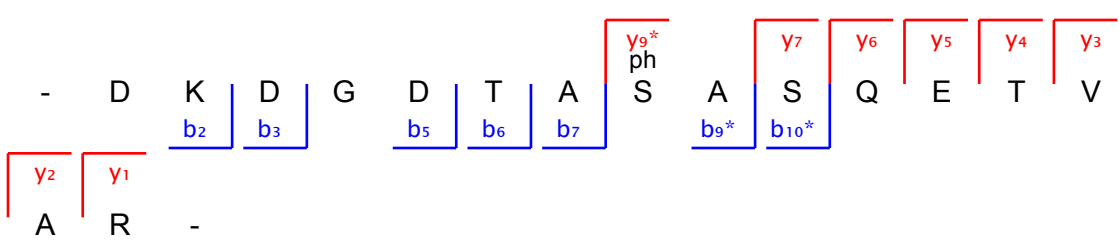

Raw file Scan Method Score m/z  
 2013\_COL15\_38\_45 4777 FTMS; HCD 70.45 476.53

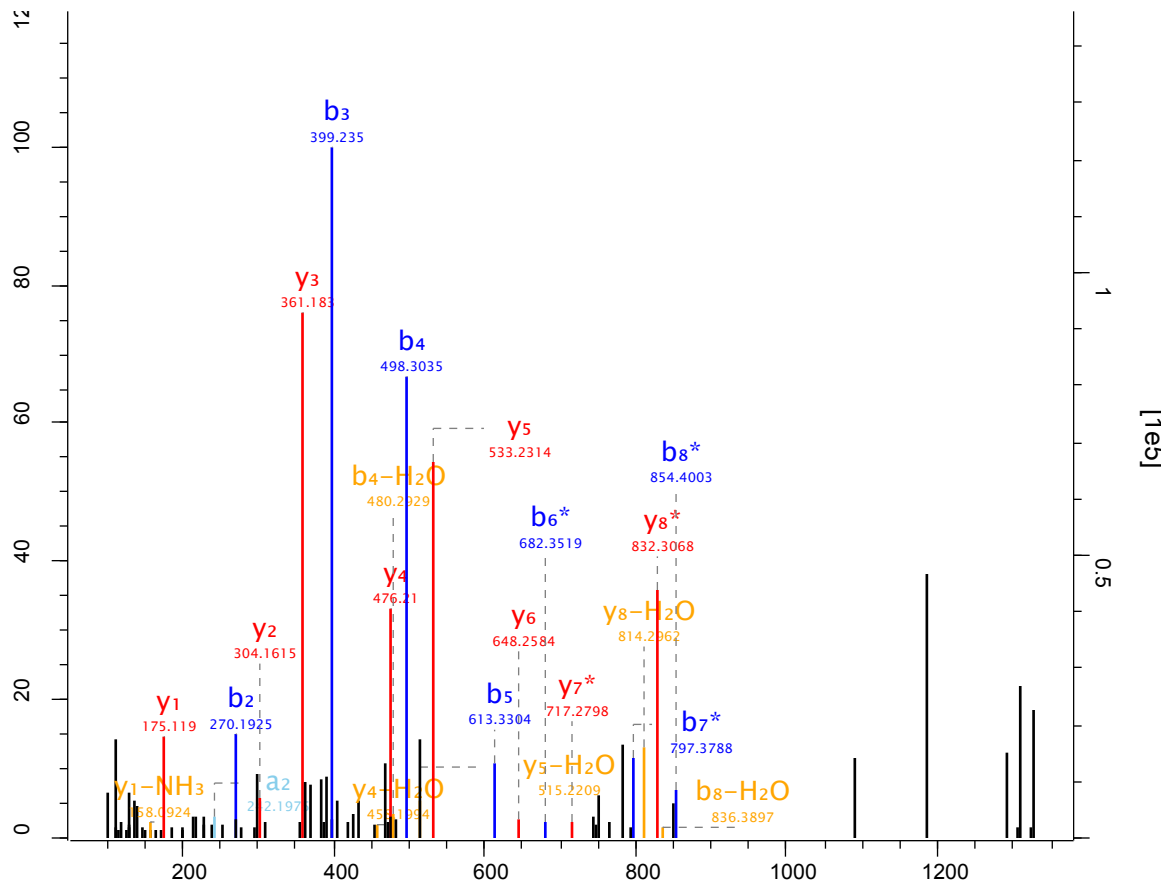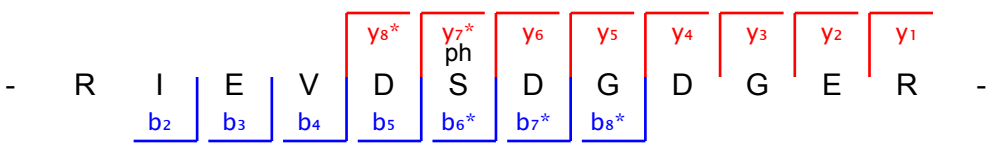



| Raw file         | Scan | Method    | Score | m/z    |
|------------------|------|-----------|-------|--------|
| 2013_COL15_38_45 | 4870 | FTMS; HCD | 44.19 | 580.26 |

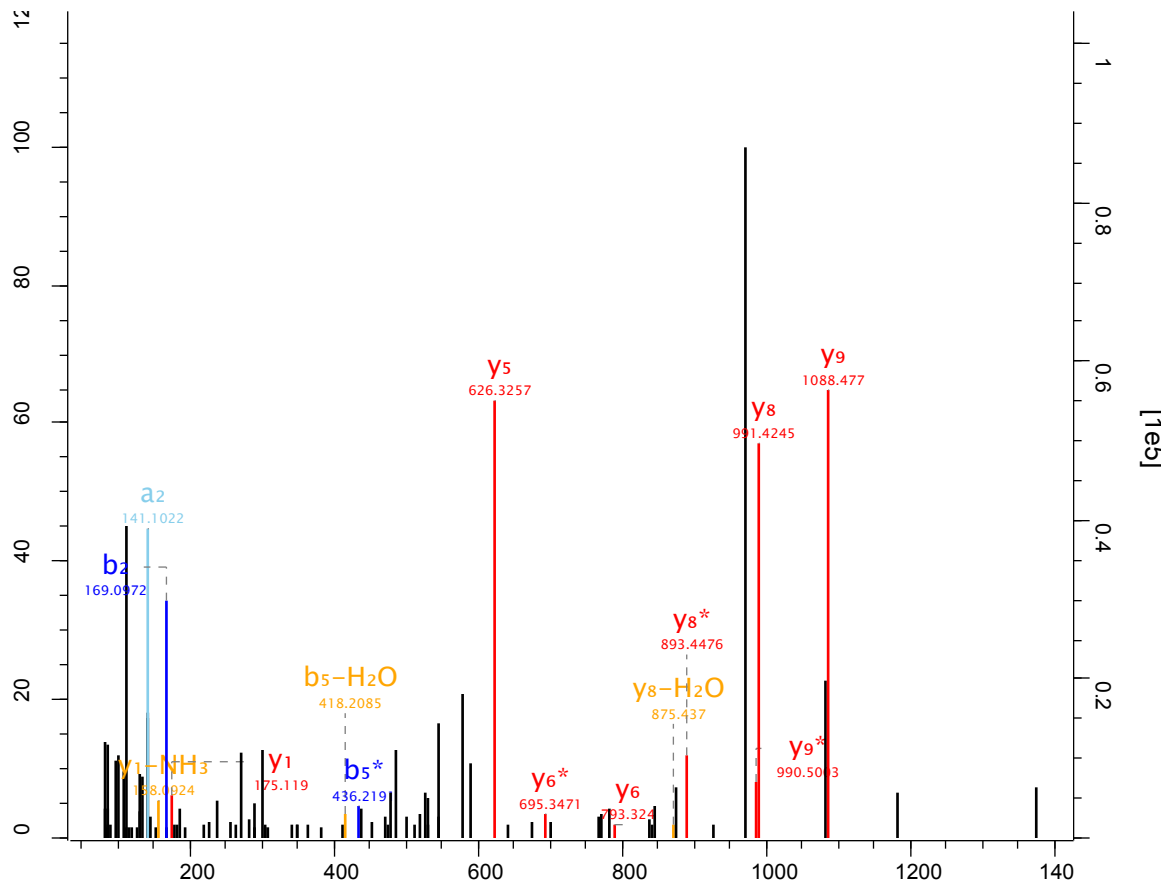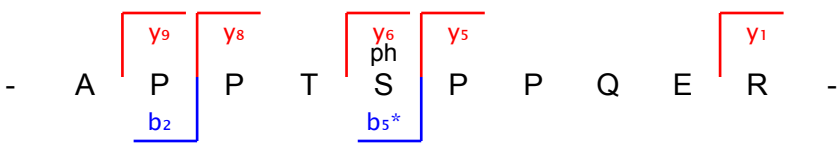

| Raw file         | Scan | Method    | Score | m/z    |
|------------------|------|-----------|-------|--------|
| 2013_COL15_38_45 | 4872 | FTMS; HCD | 86.79 | 601.59 |

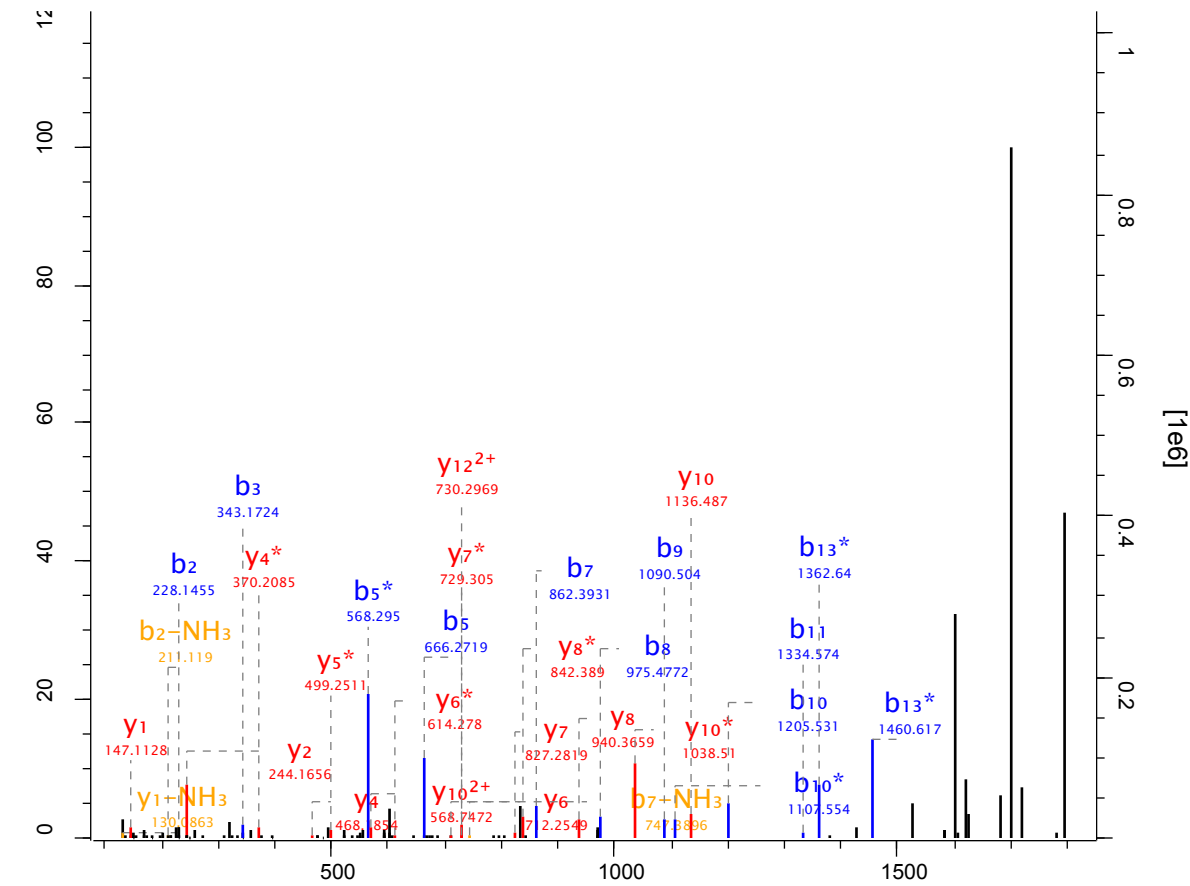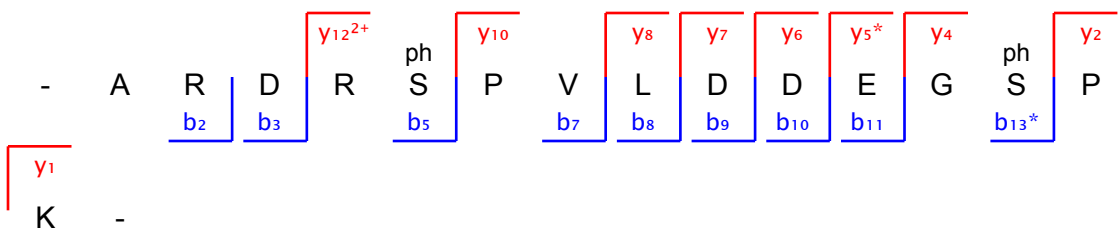

Raw file Scan Method Score m/z  
 2013\_COL15\_38\_45 5166 FTMS; HCD 222.75 814.81

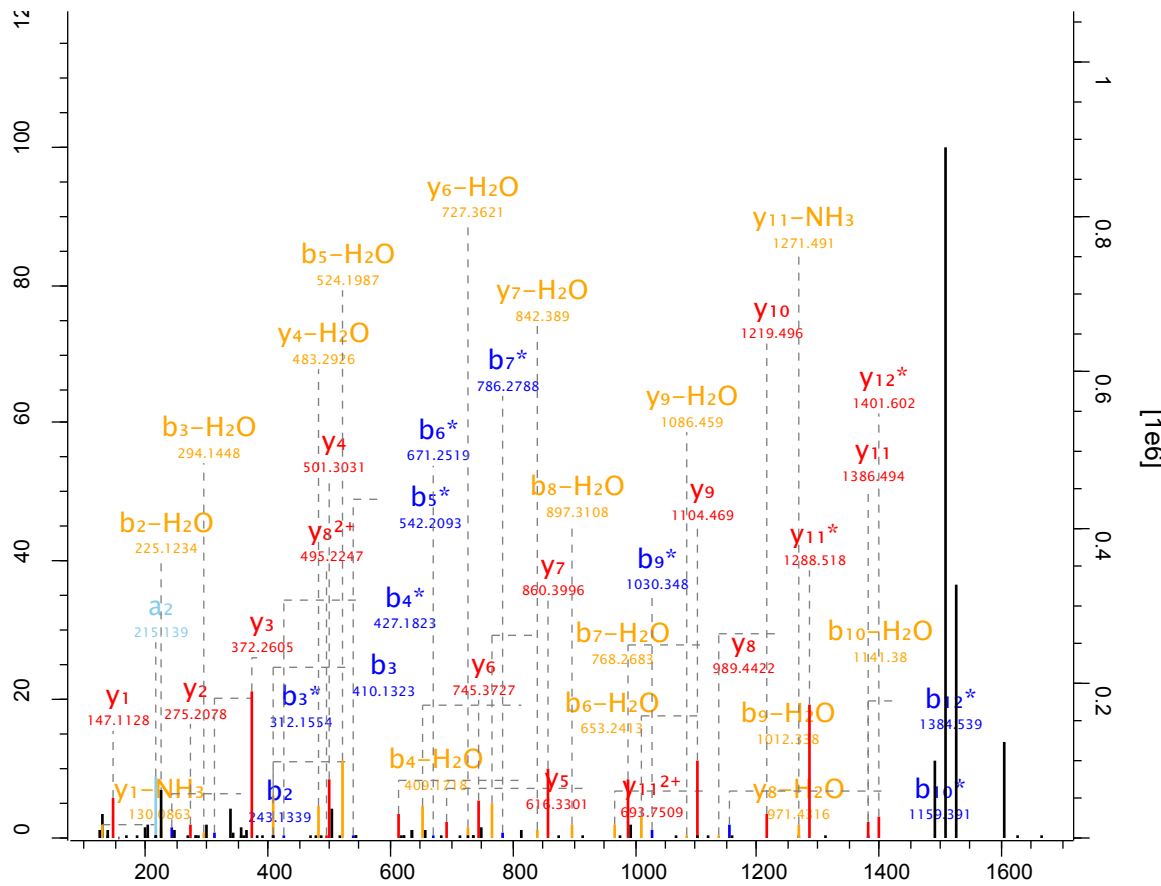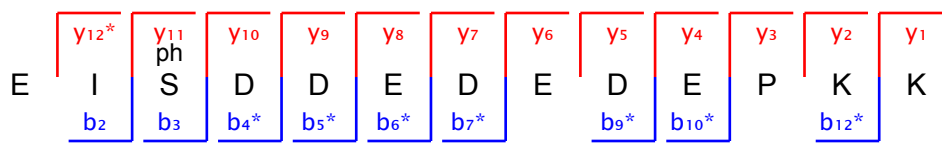

Raw file Scan Method Score m/z  
 2013\_COL15\_38\_45 5682 FTMS; HCD 79.49 550.25

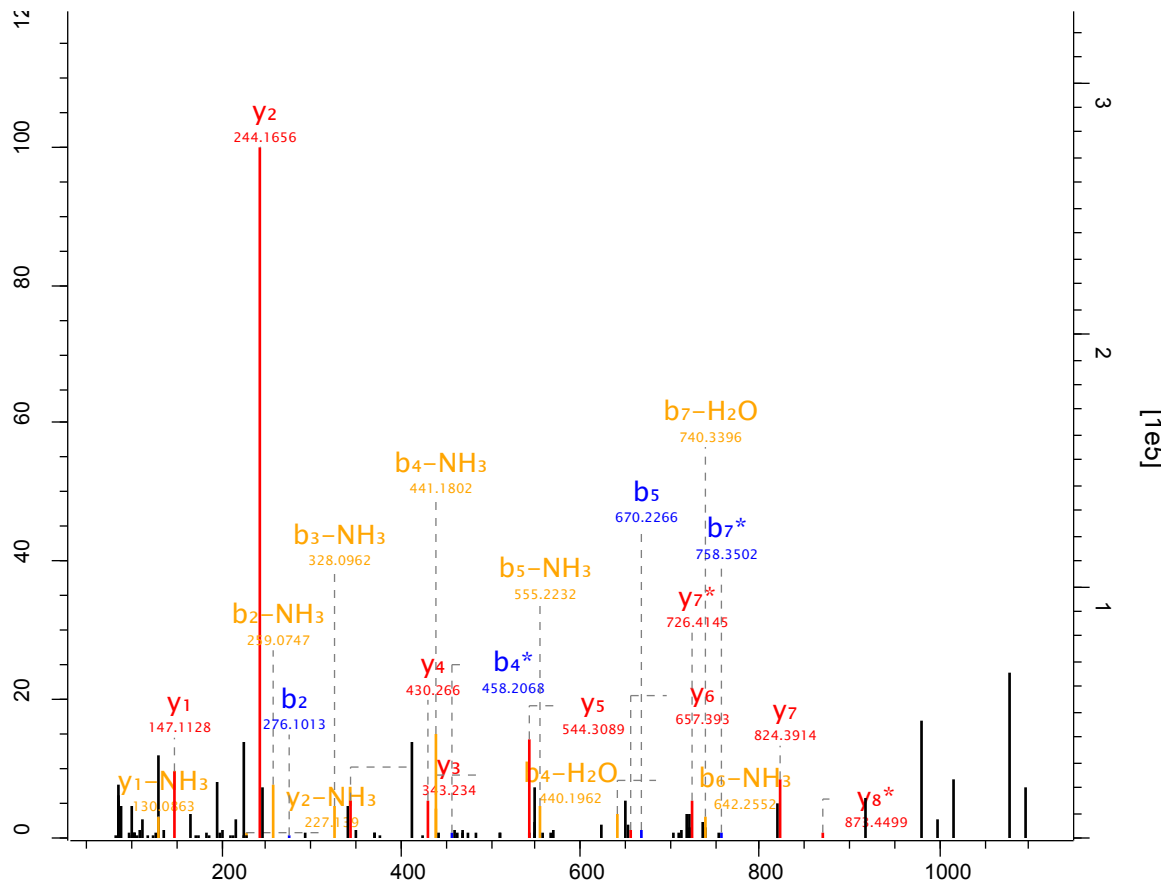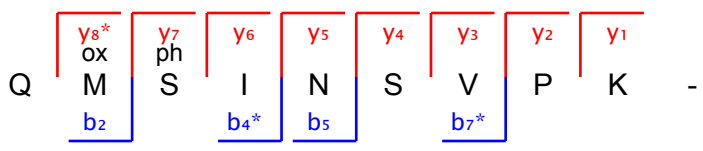

Raw file Scan Method Score m/z  
 2013\_COL15\_38\_45 5760 FTMS; HCD 62.29 601.26

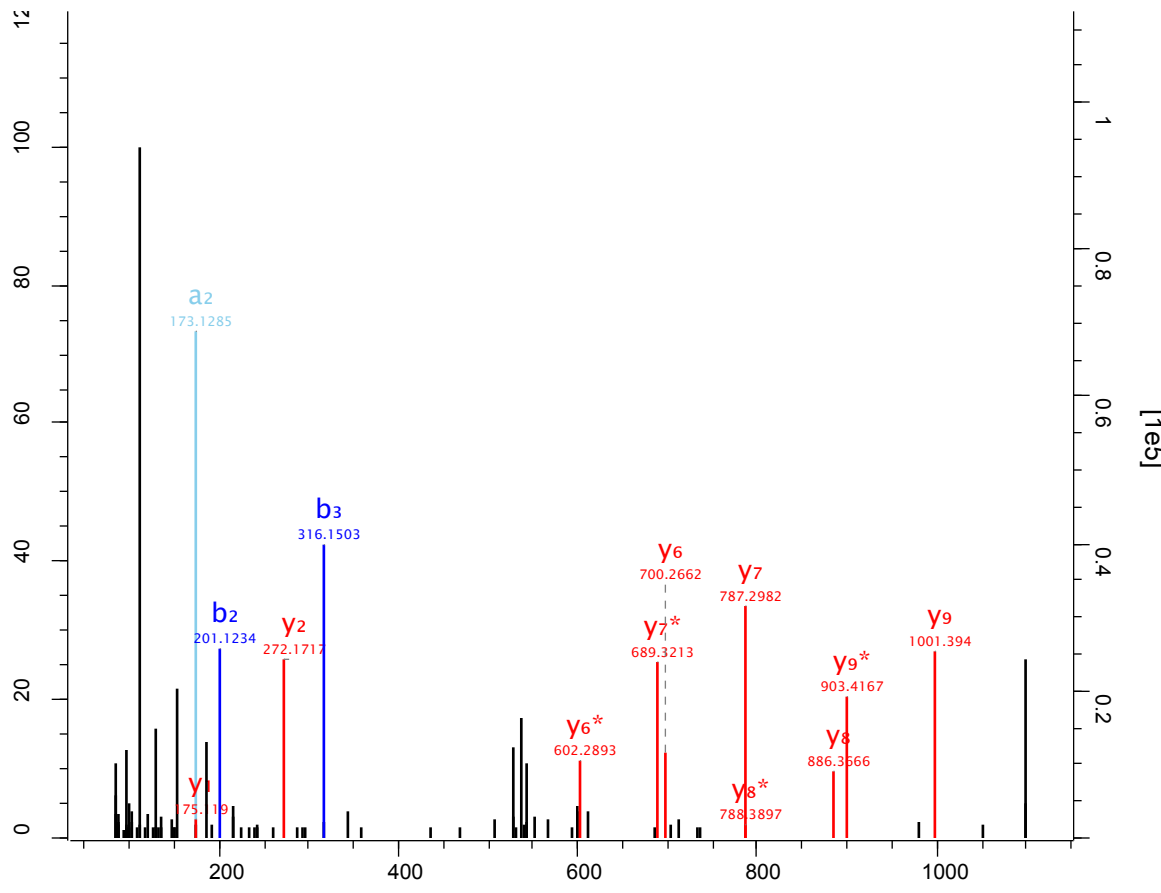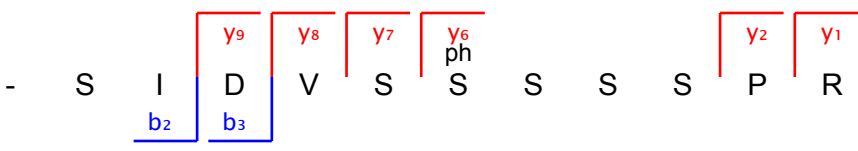

| Raw file         | Scan | Method    | Score | m/z    |
|------------------|------|-----------|-------|--------|
| 2013_COL15_38_45 | 5766 | FTMS; HCD | 40.48 | 509.21 |

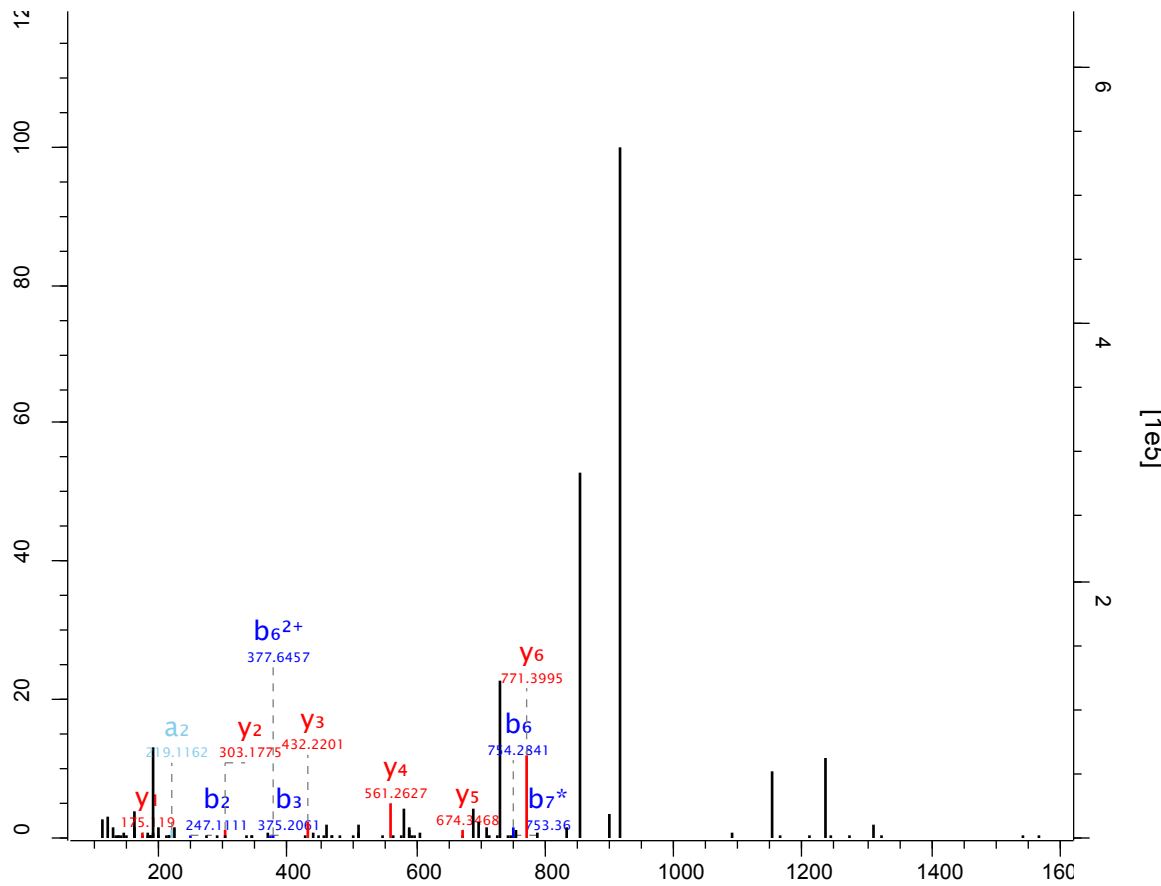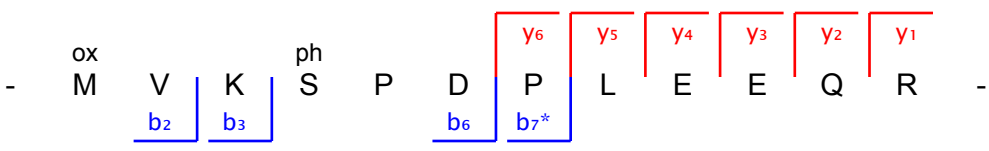

Raw file Scan Method Score m/z  
 2013\_COL15\_38\_45 5774 FTMS; HCD 42.32 571.73

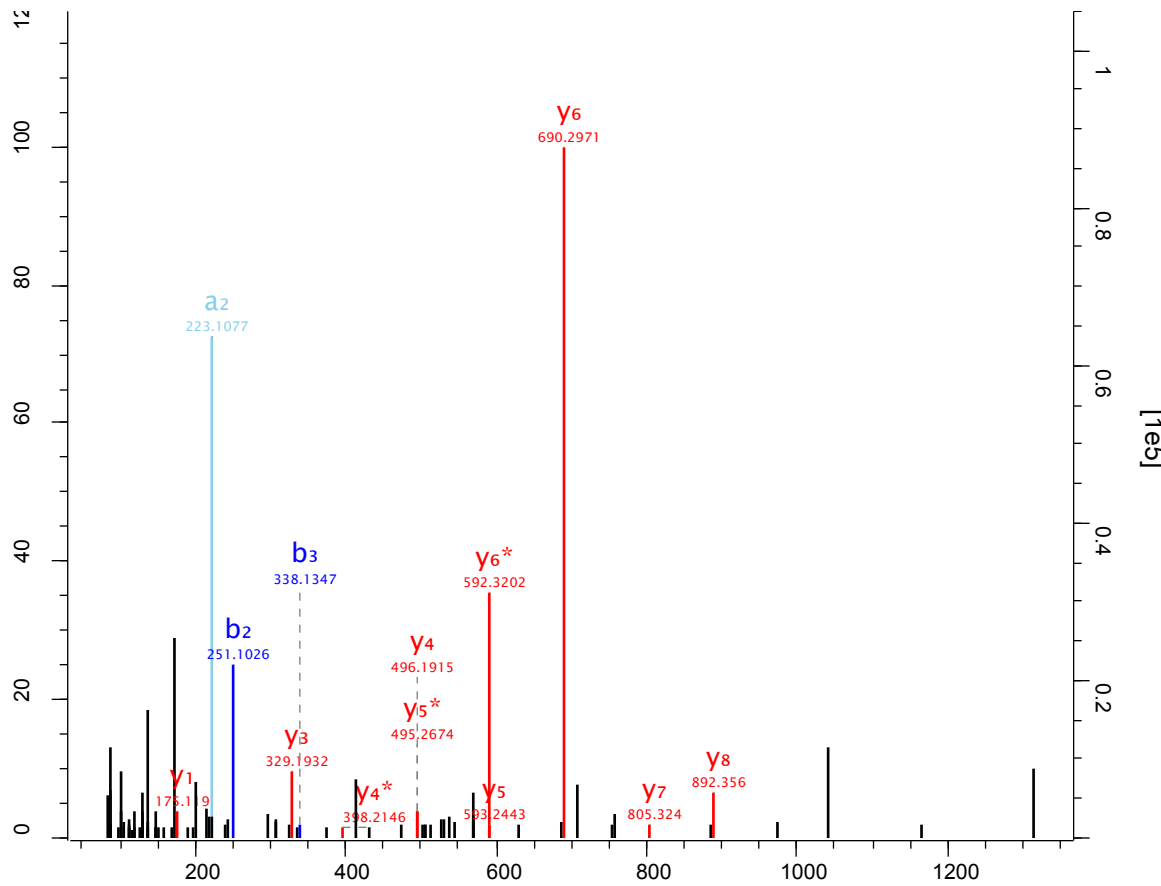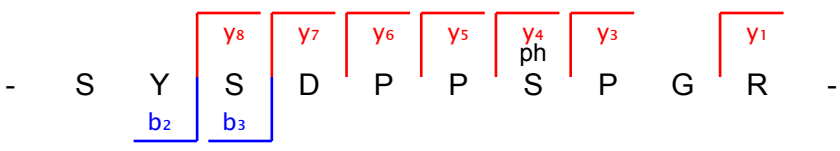

Raw file 2013\_COL15\_38\_45 Scan 5991 Method FTMS; HCD Score 84.36 m/z 600.78

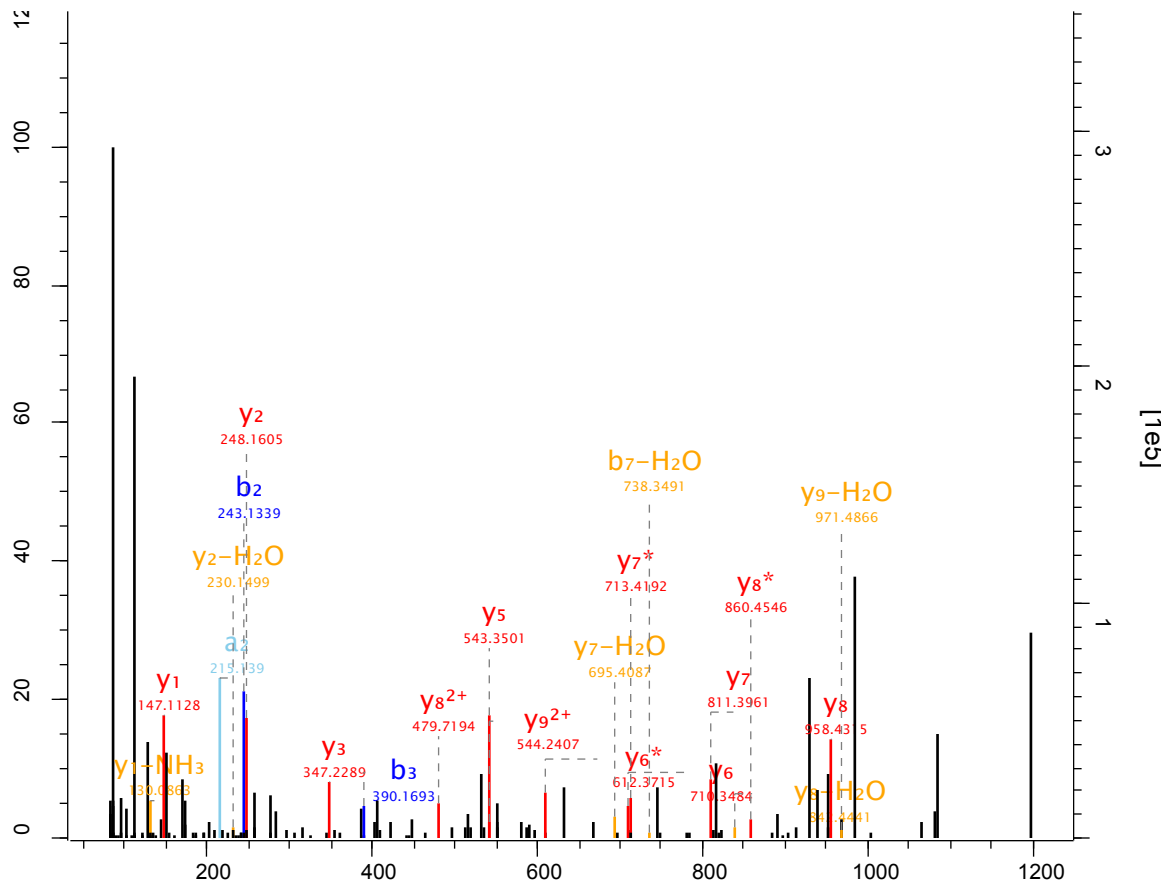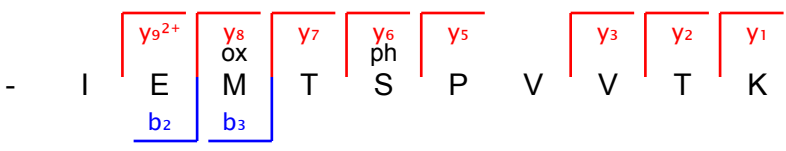





Raw file Scan Method Score m/z  
 2013\_COL15\_38\_45 6046 FTMS; HCD 92.38 697.26

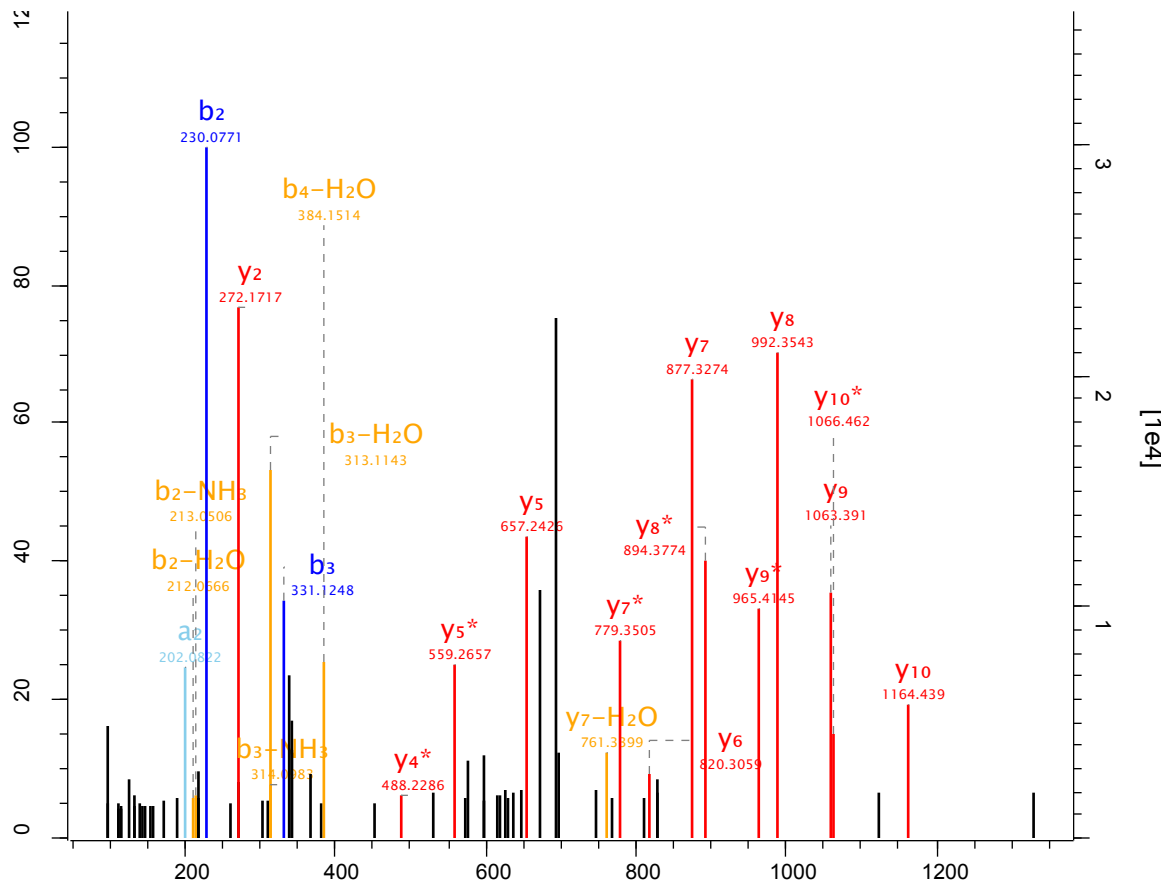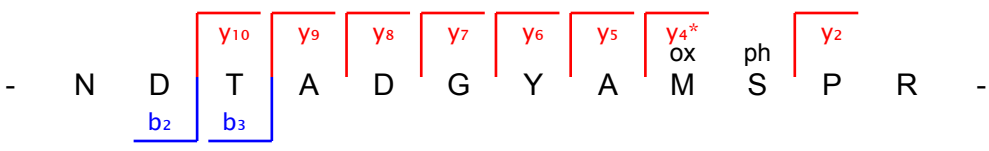

Raw file Scan Method Score m/z  
 2013\_COL15\_38\_45 6187 FTMS; HCD 50.3 673.28

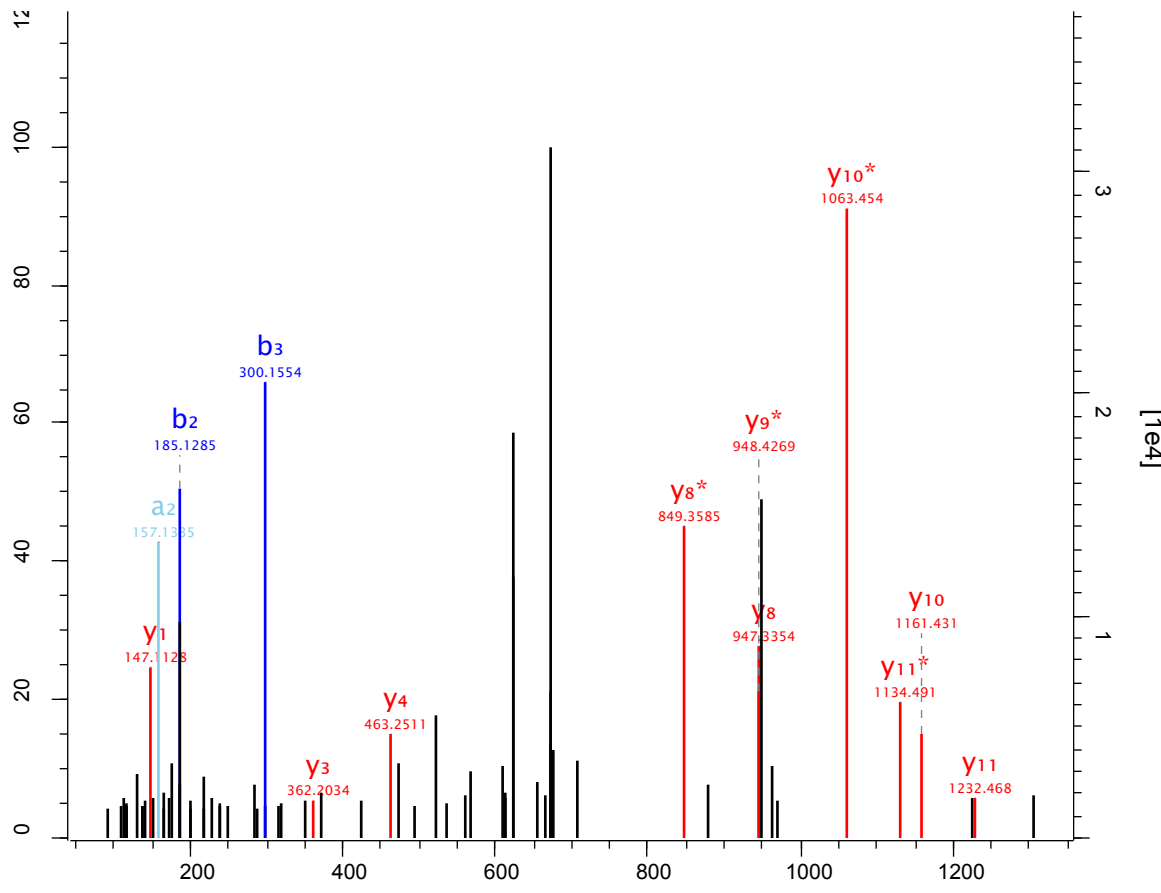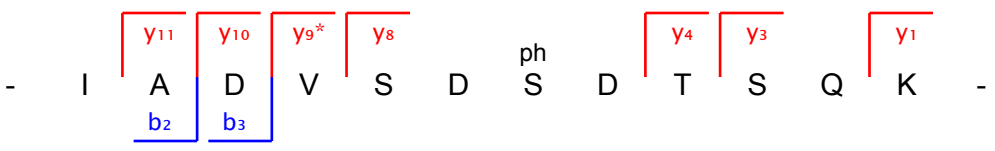

Raw file Scan Method Score m/z  
 2013\_COL15\_38\_45 6219 FTMS; HCD 89.86 642.25

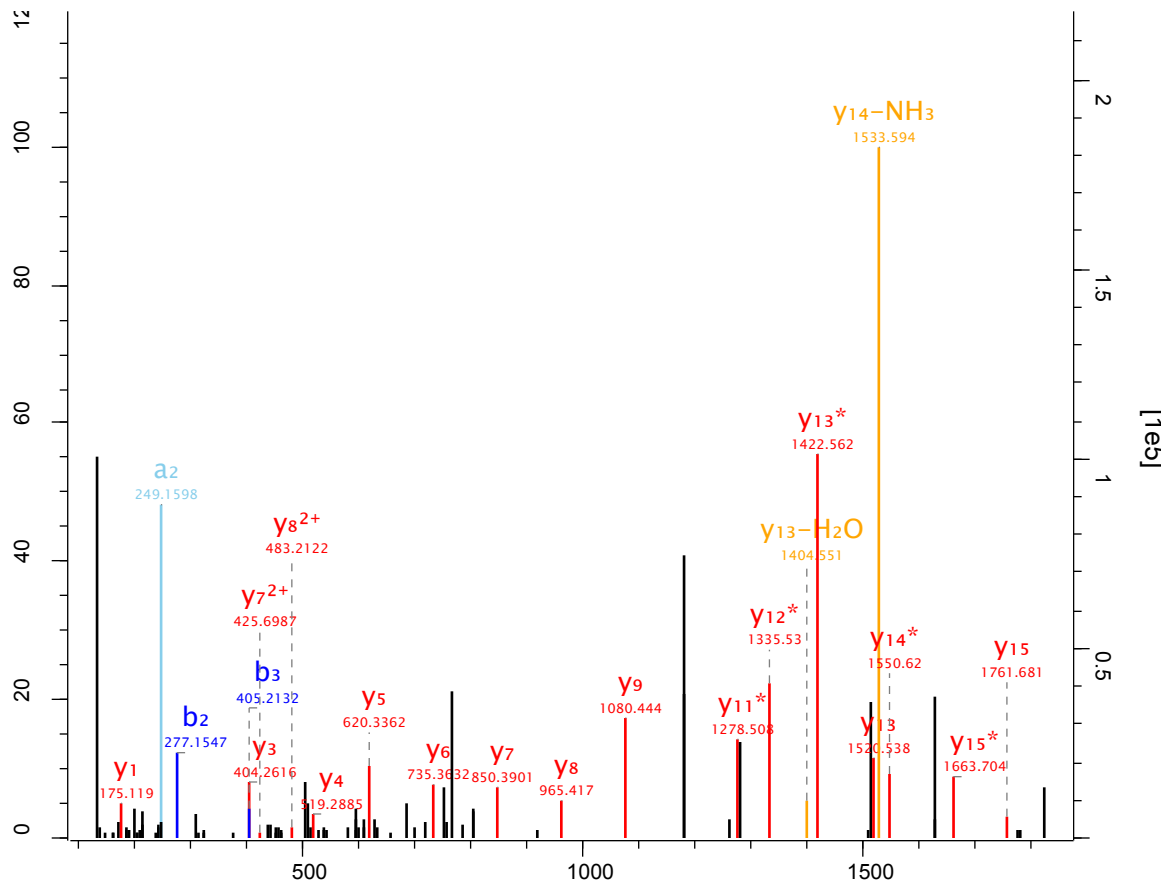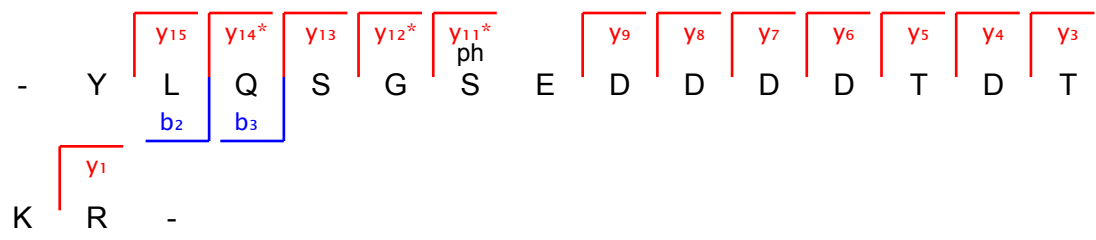

Raw file 2013\_COL15\_38\_45 Scan 6299 Method FTMS; HCD Score 43.95 m/z 641.29

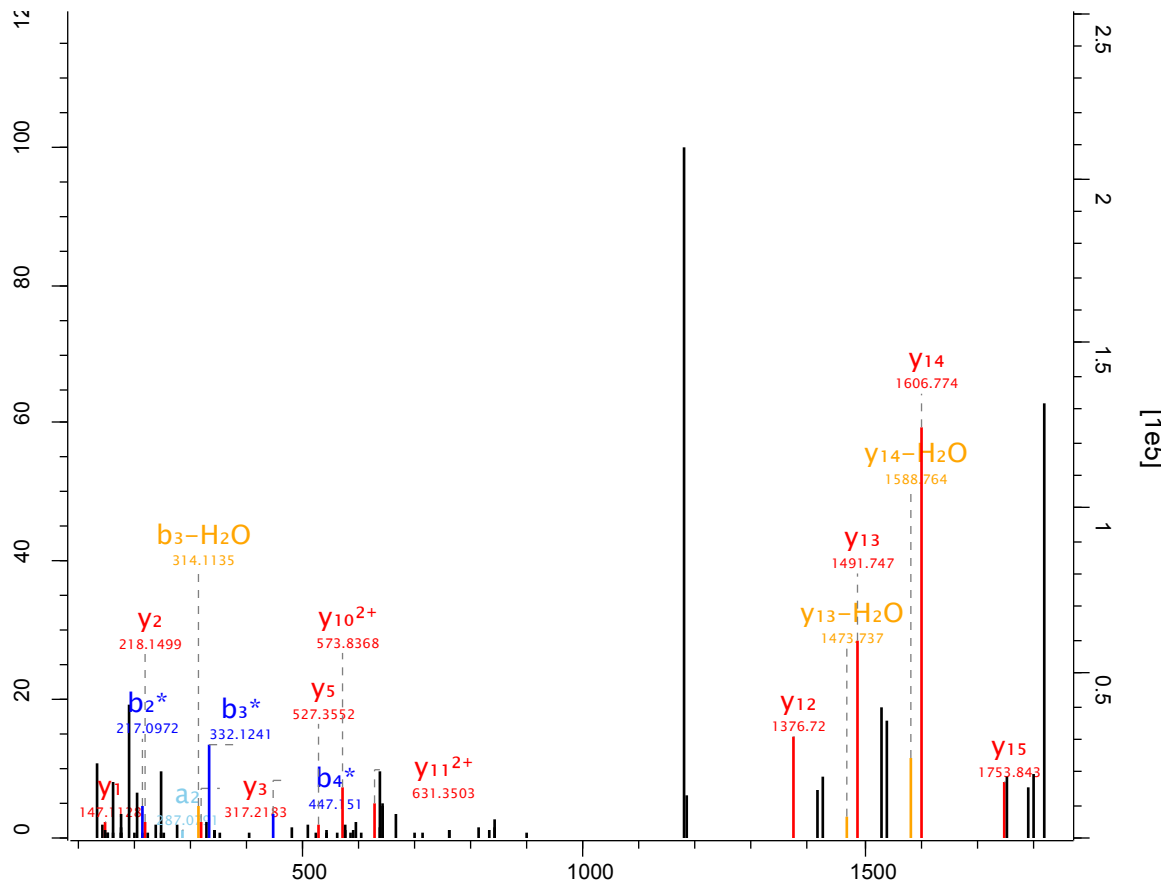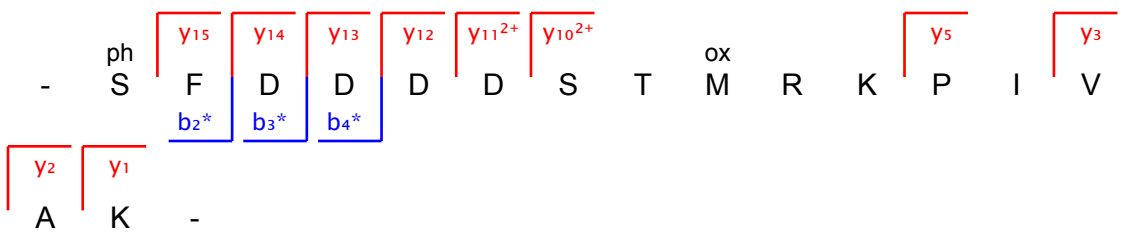

Raw file Scan Method Score m/z  
 2013\_COL15\_38\_45 6372 FTMS; HCD 130.87 750.33

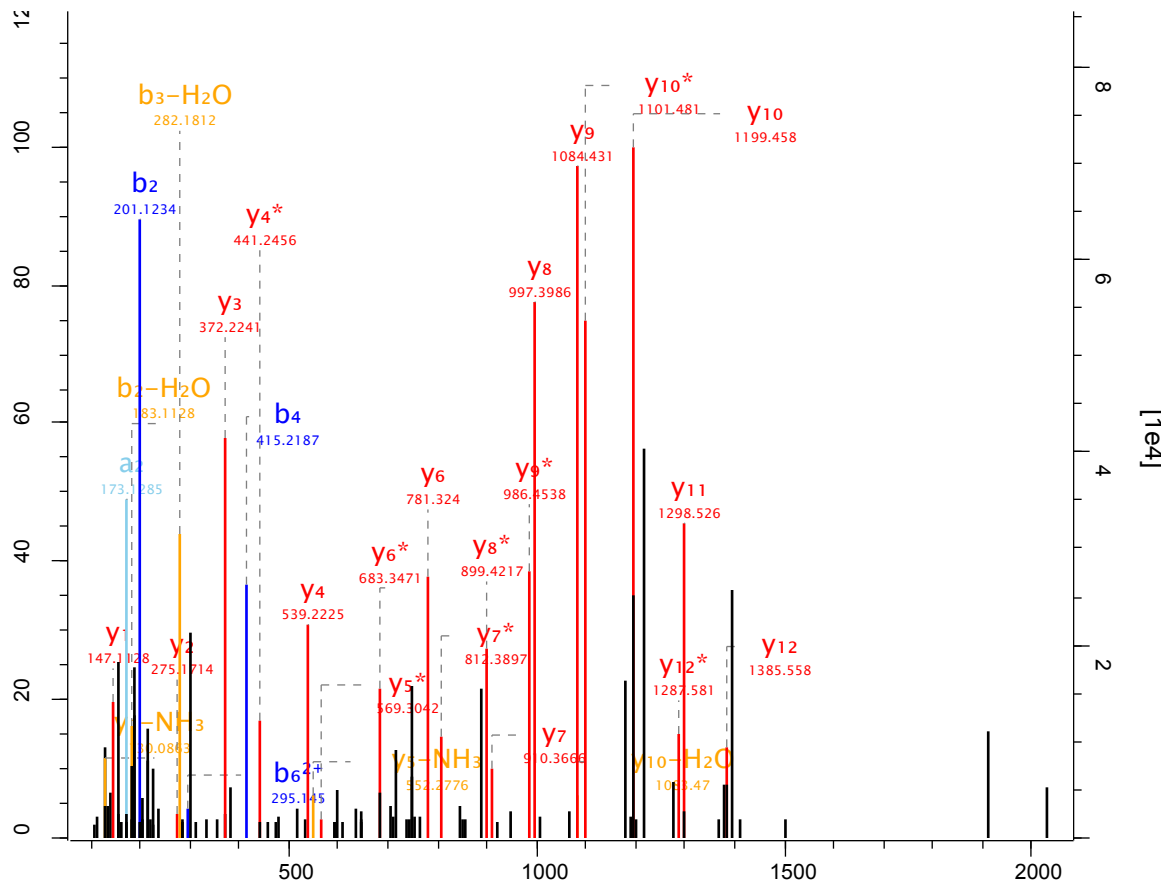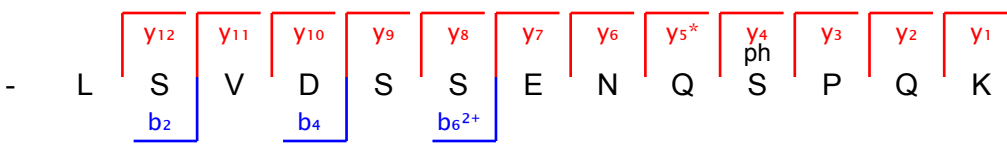

| Raw file         | Scan | Method    | Score | m/z    |
|------------------|------|-----------|-------|--------|
| 2013_COL15_38_45 | 6673 | FTMS; HCD | 73.93 | 661.33 |

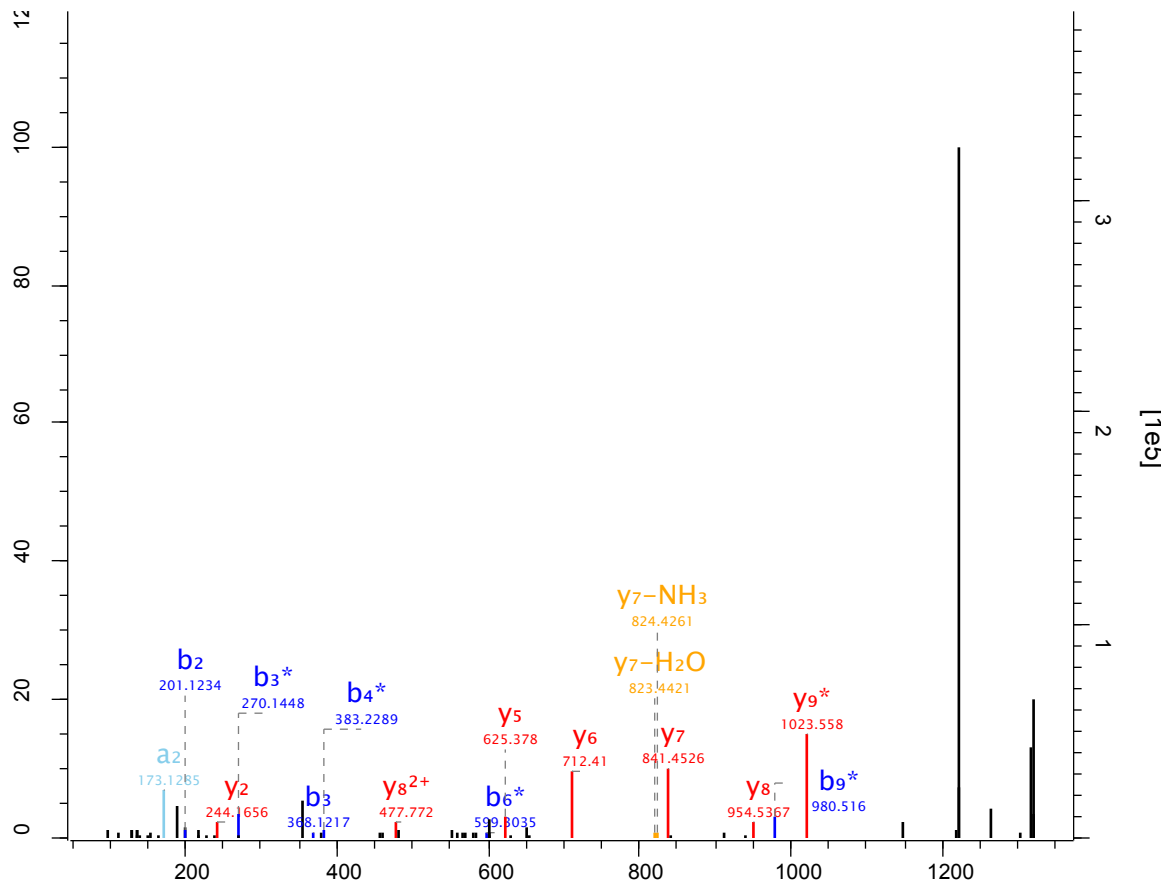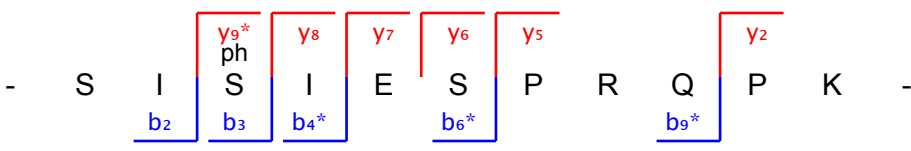

Raw file Scan Method Score m/z  
 2013\_COL15\_38\_45 6778 FTMS; HCD 132.81 657.3

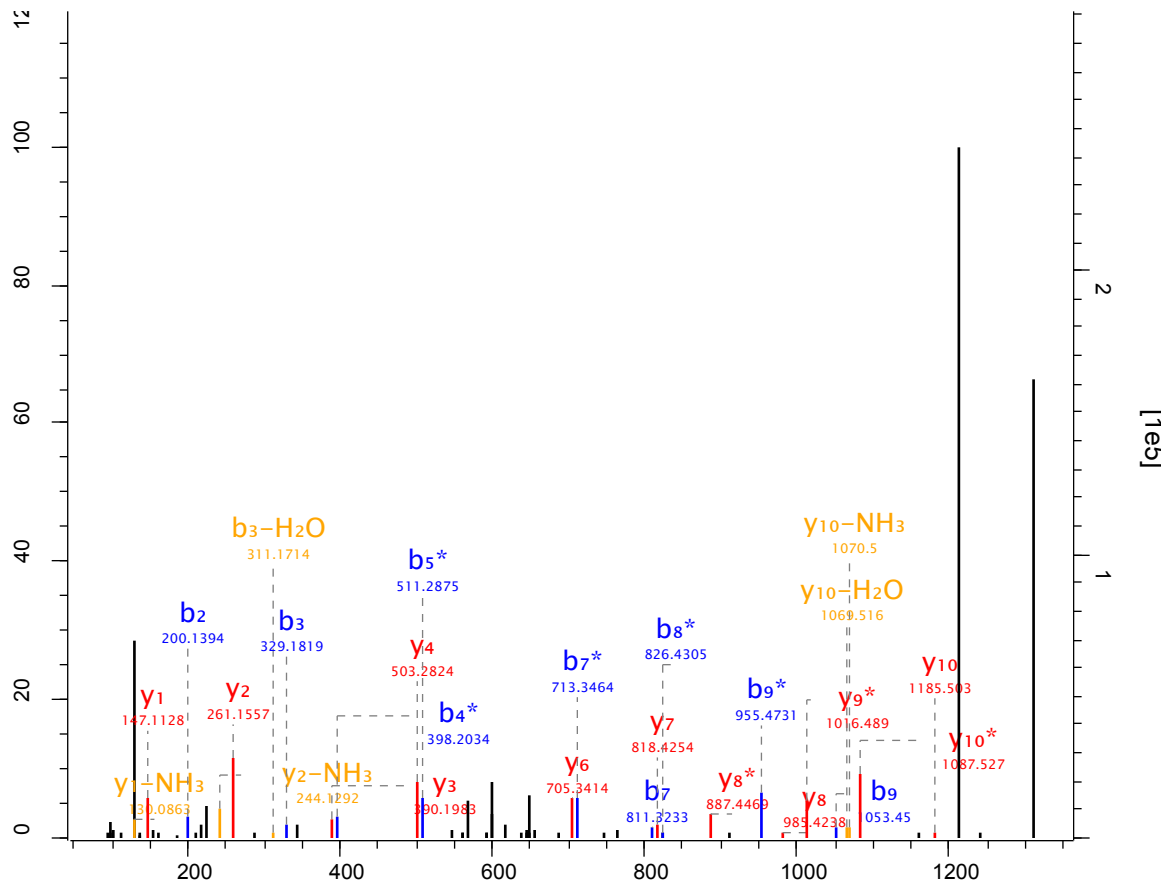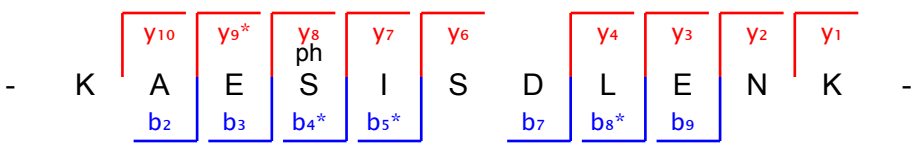



Raw file Scan Method Score m/z  
 2013\_COL15\_38\_45 6848 FTMS; HCD 66.83 530.23

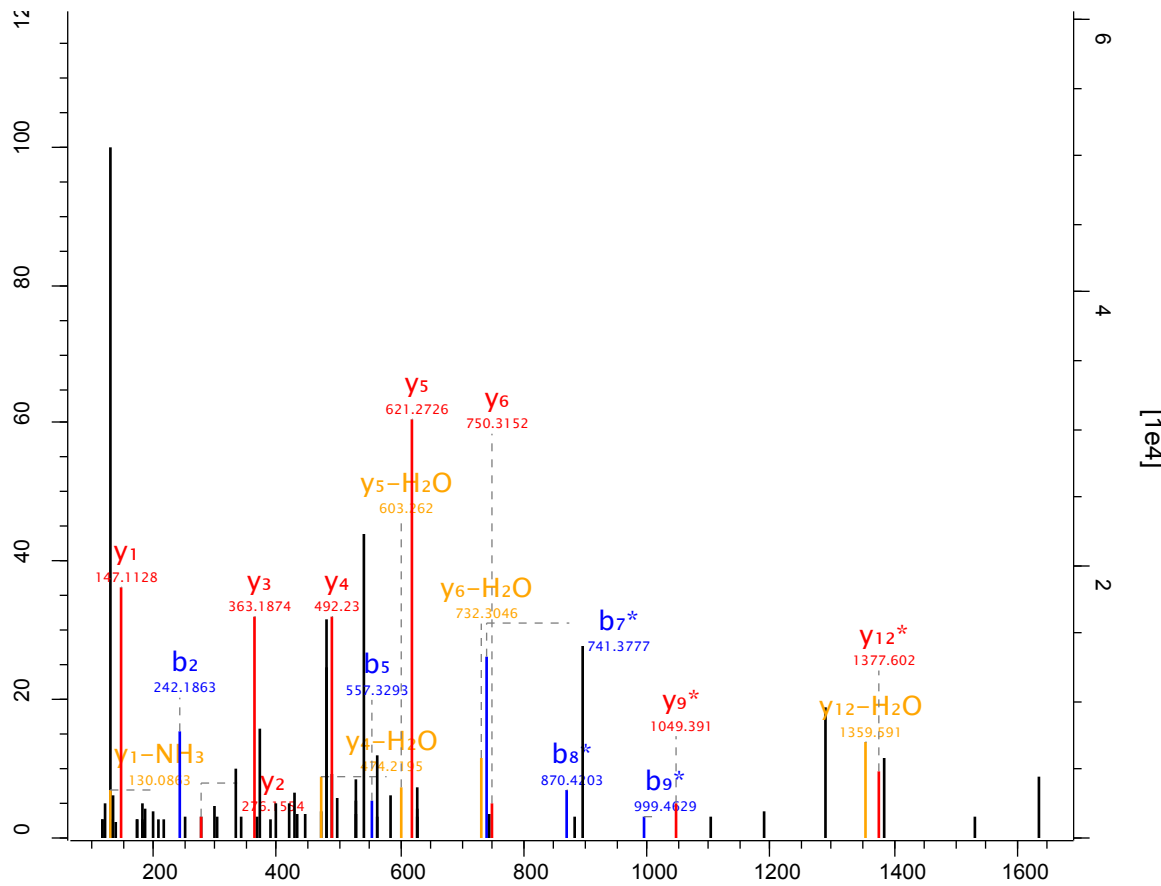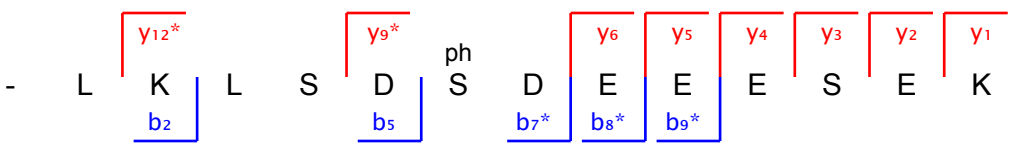

Raw file Scan Method Score m/z  
 2013\_COL15\_38\_45 6927 FTMS; HCD 77.78 650.25

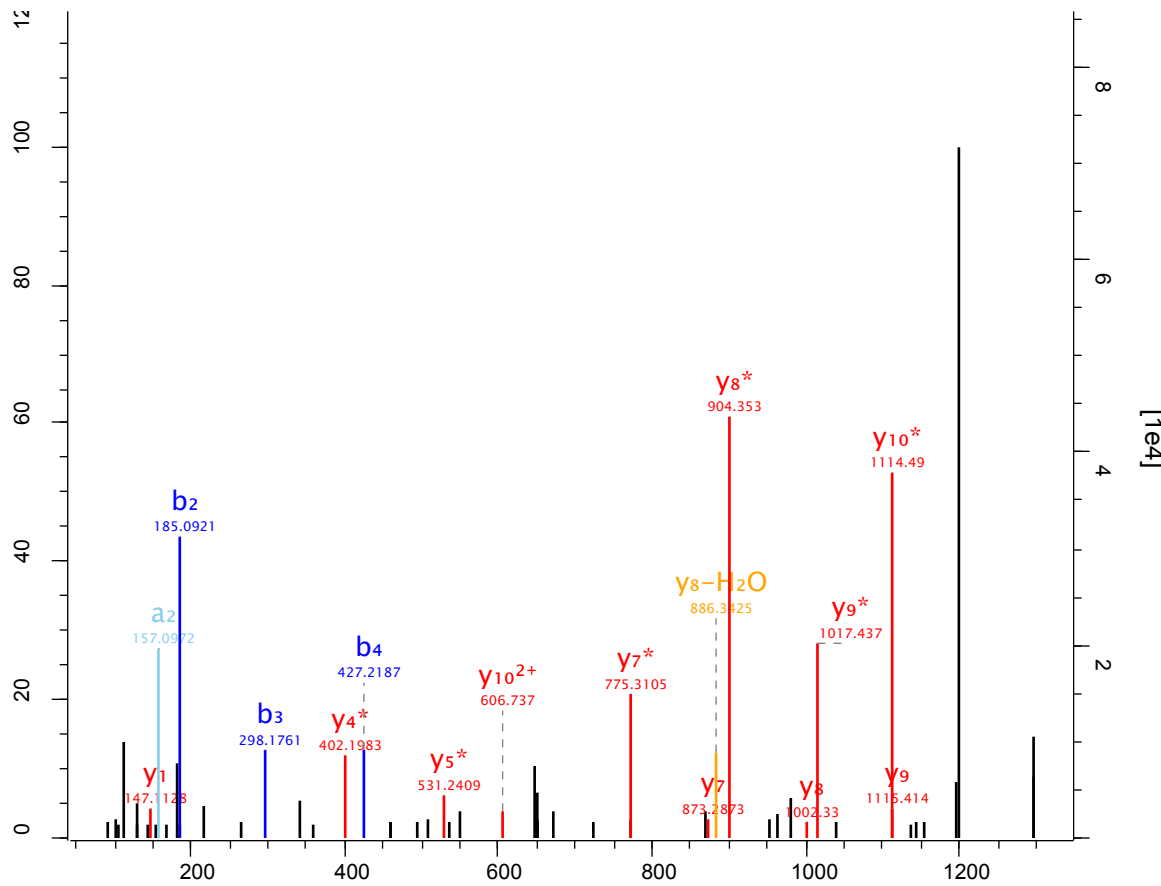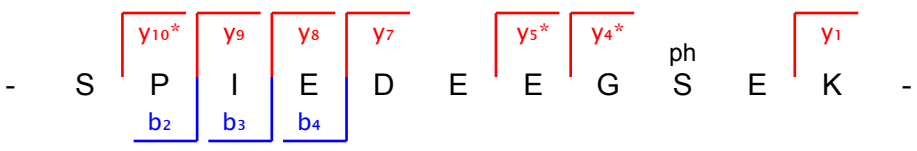

Raw file Scan Method Score m/z  
 2013\_COL15\_38\_45 7749 FTMS; HCD 169.67 744.28

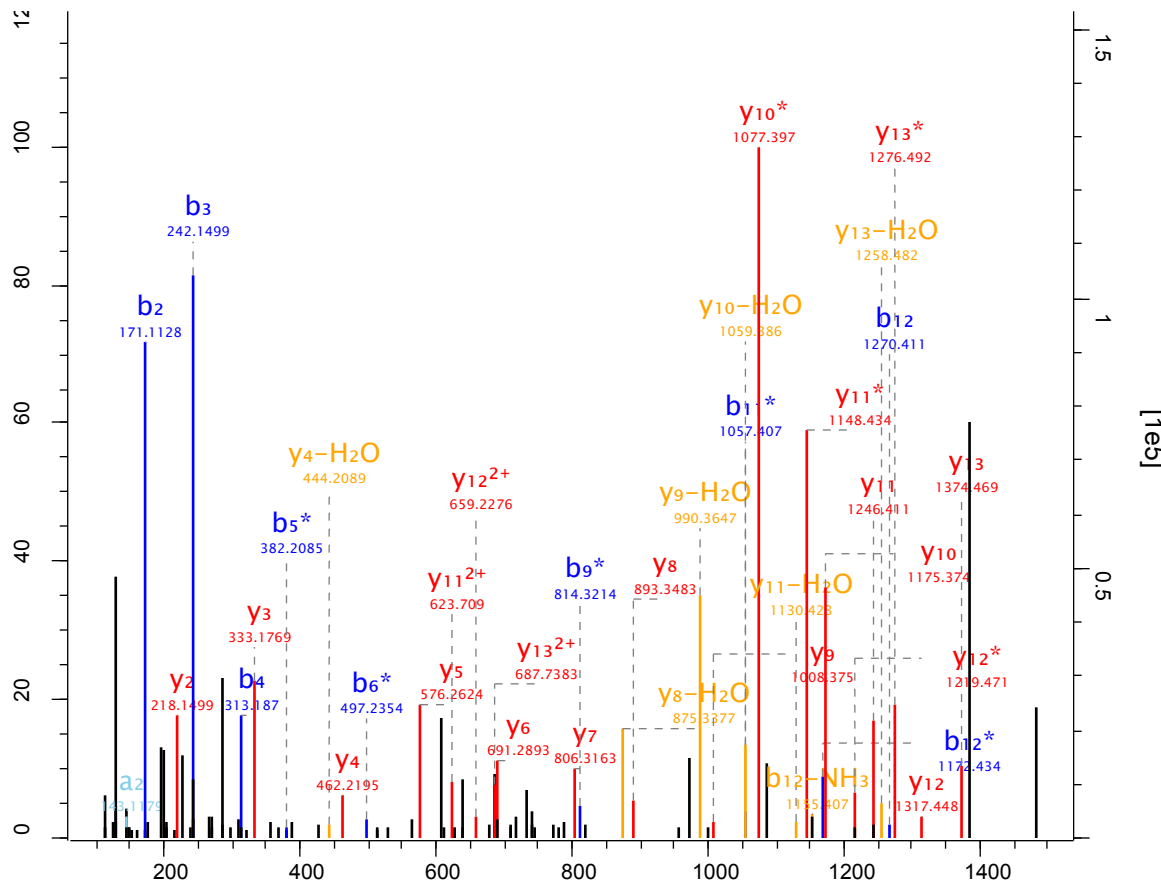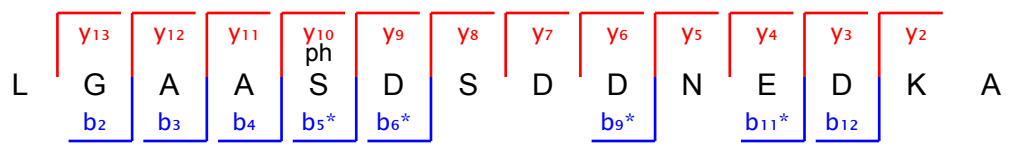

Raw file Scan Method Score m/z  
 2013\_COL15\_38\_45 7752 FTMS; HCD 111.77 864.31

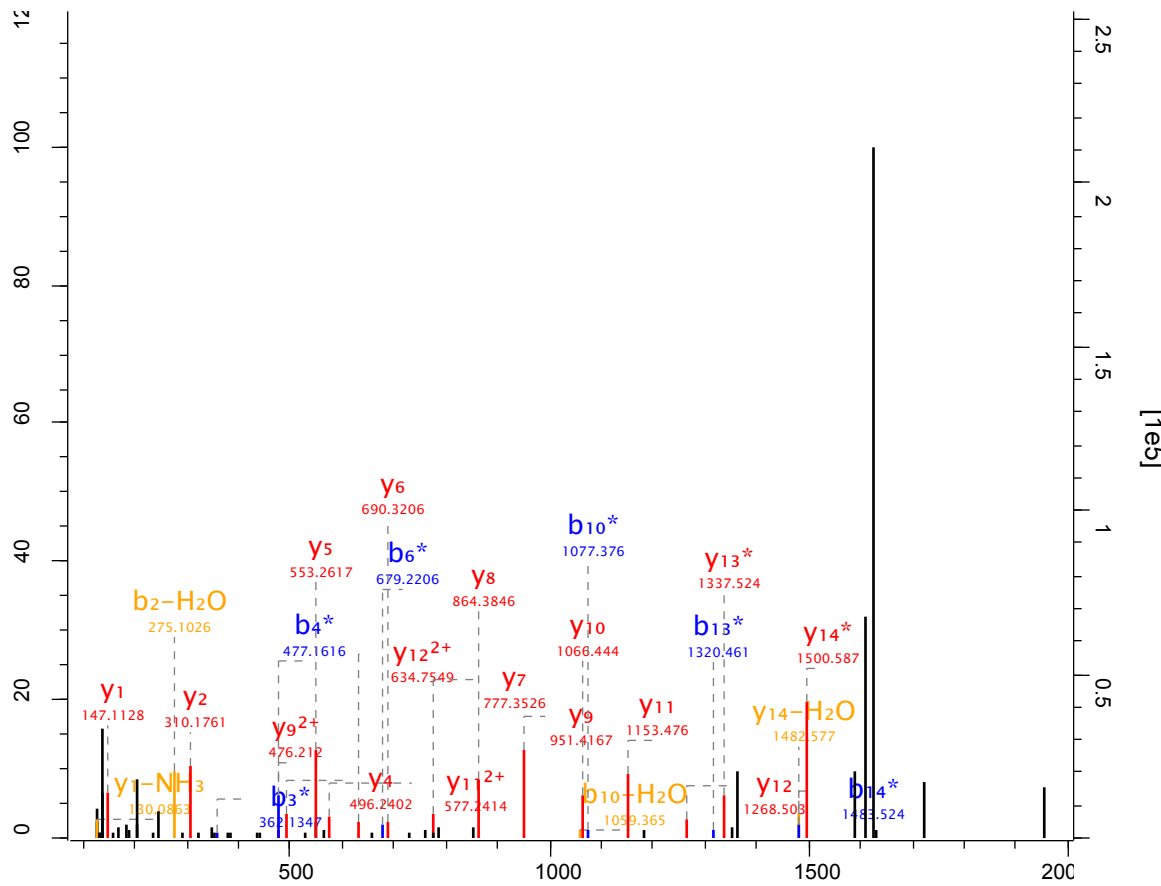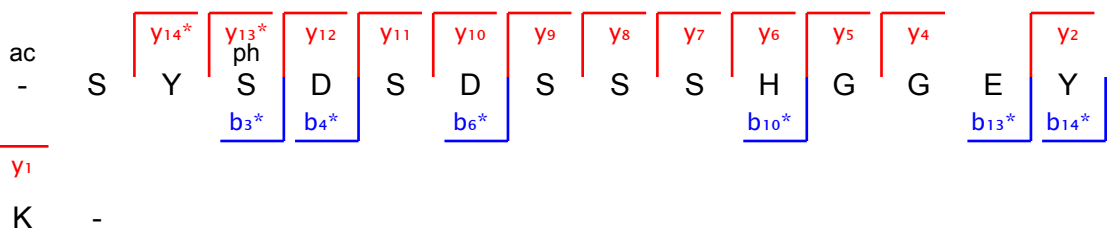

| Raw file         | Scan | Method    | Score | m/z    |
|------------------|------|-----------|-------|--------|
| 2013_COL15_38_45 | 7856 | FTMS; HCD | 58.02 | 766.31 |

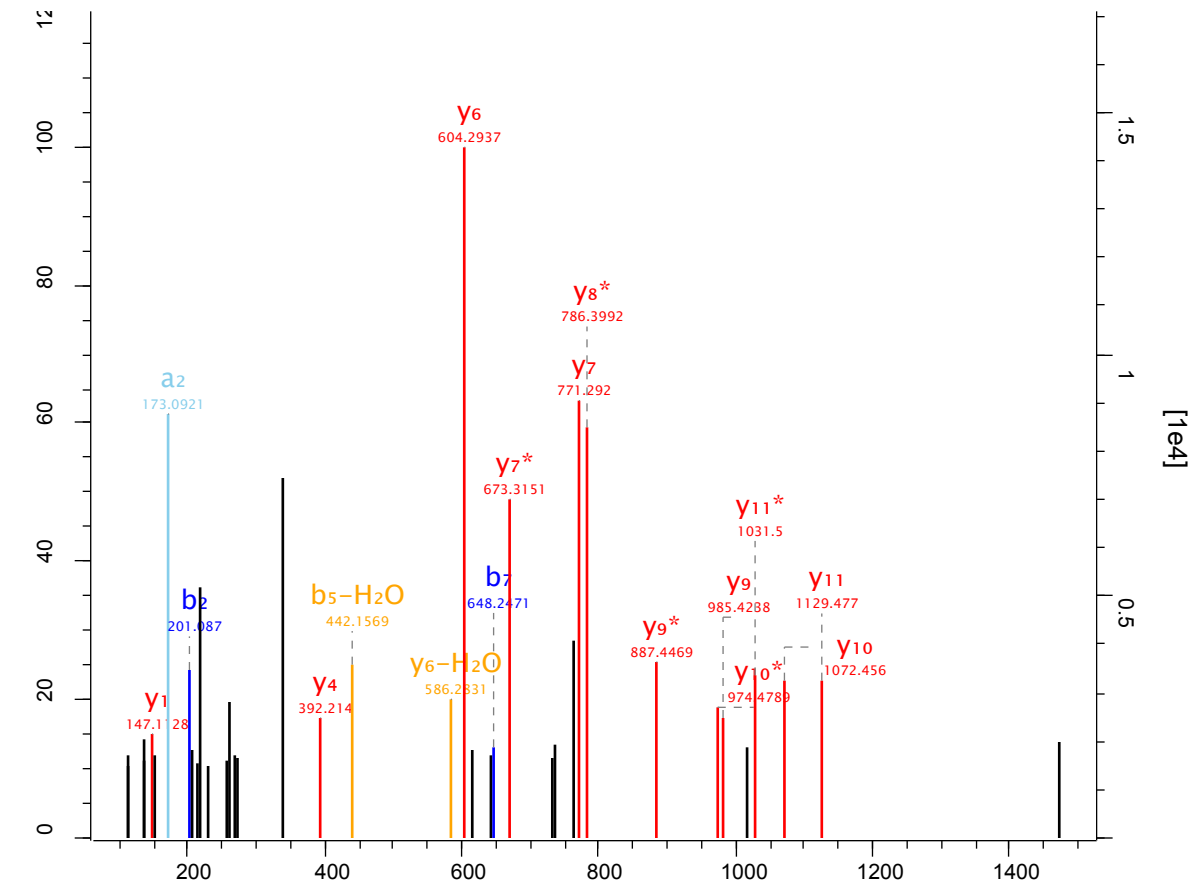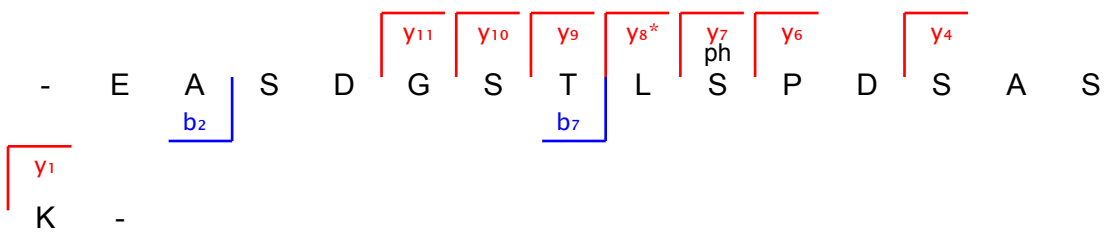

| Raw file         | Scan | Method    | Score | m/z    |
|------------------|------|-----------|-------|--------|
| 2013_COL15_38_45 | 8132 | FTMS; HCD | 41.62 | 643.26 |

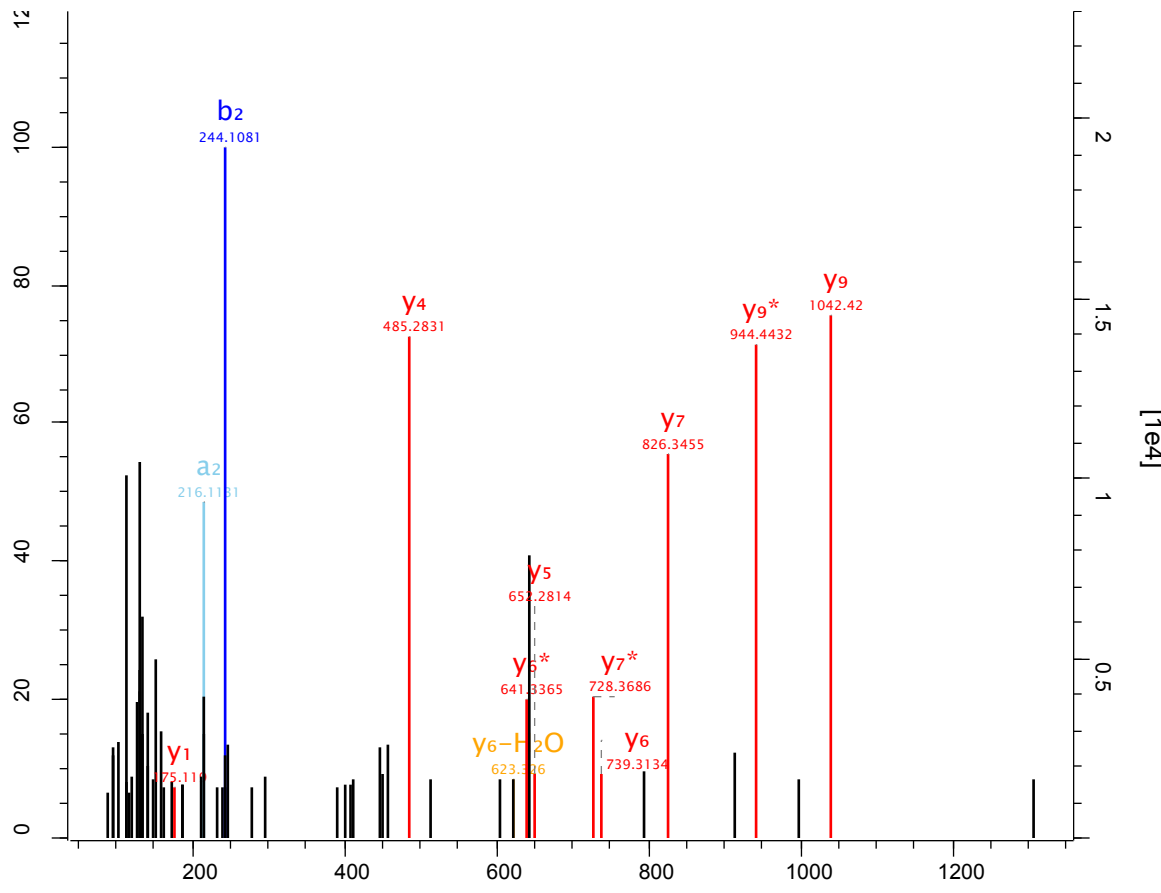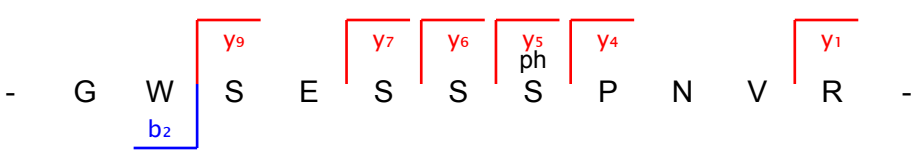

Raw file Scan Method Score m/z  
 2013\_COL15\_38\_45 8173 FTMS; HCD 80.75 603.27

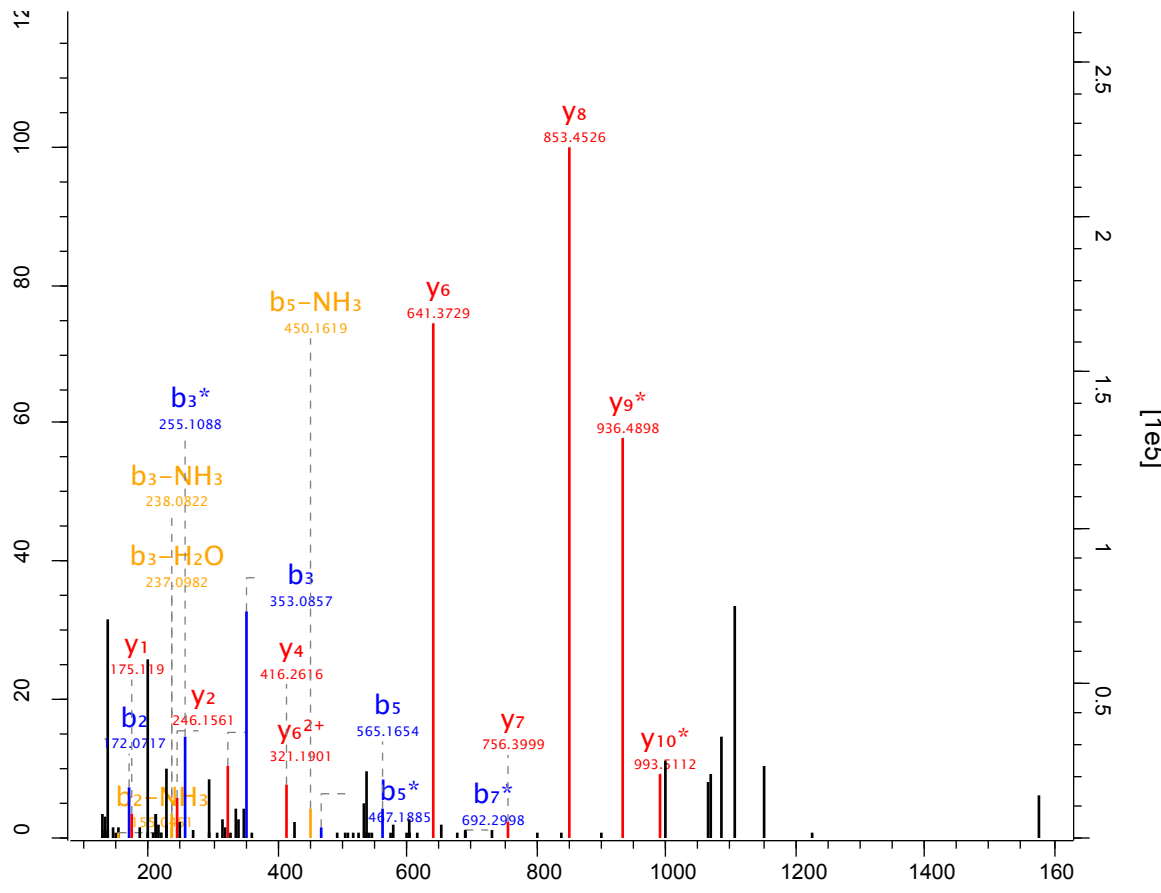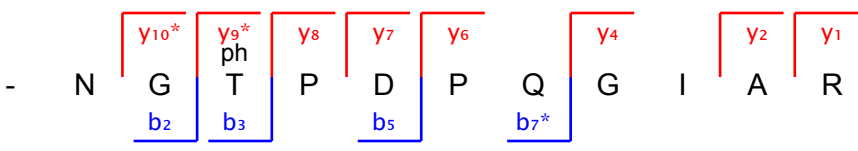

Raw file Scan Method Score m/z  
 2013\_COL15\_38\_45 8216 FTMS; HCD 62.29 771.31

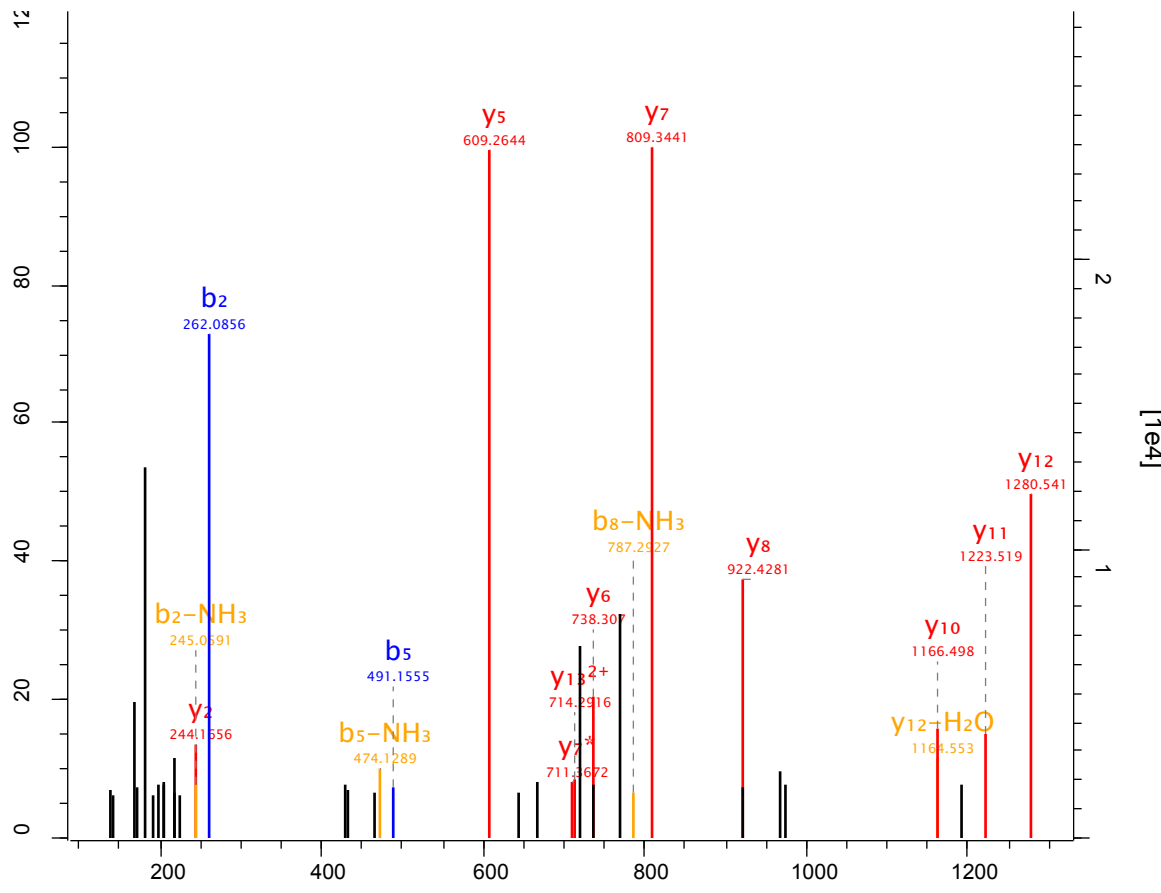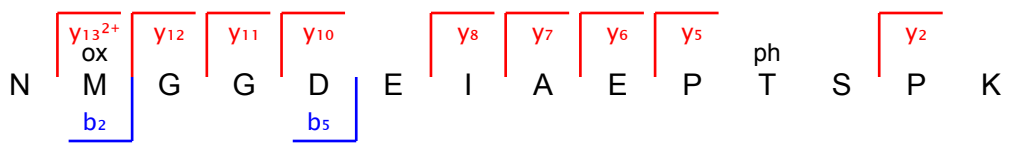



Raw file Scan Method Score m/z  
 2013\_COL15\_38\_45 8348 FTMS; HCD 52.25 532.59

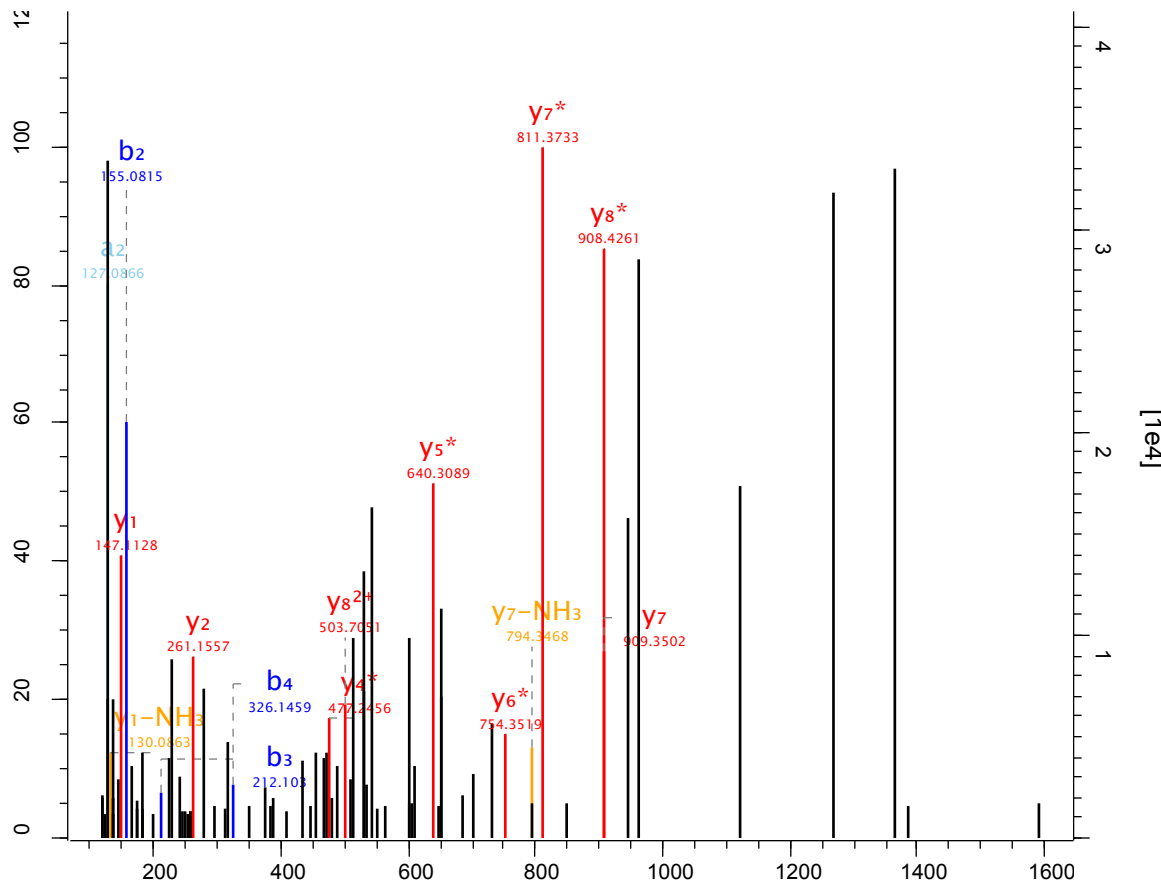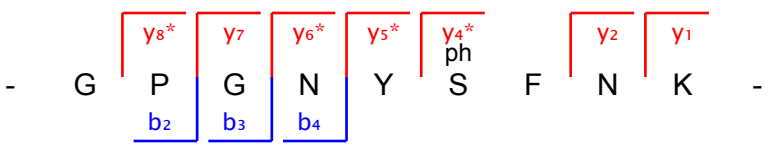

Raw file Scan Method Score m/z  
 2013\_COL15\_38\_45 8421 FTMS; HCD 111.64 687.83

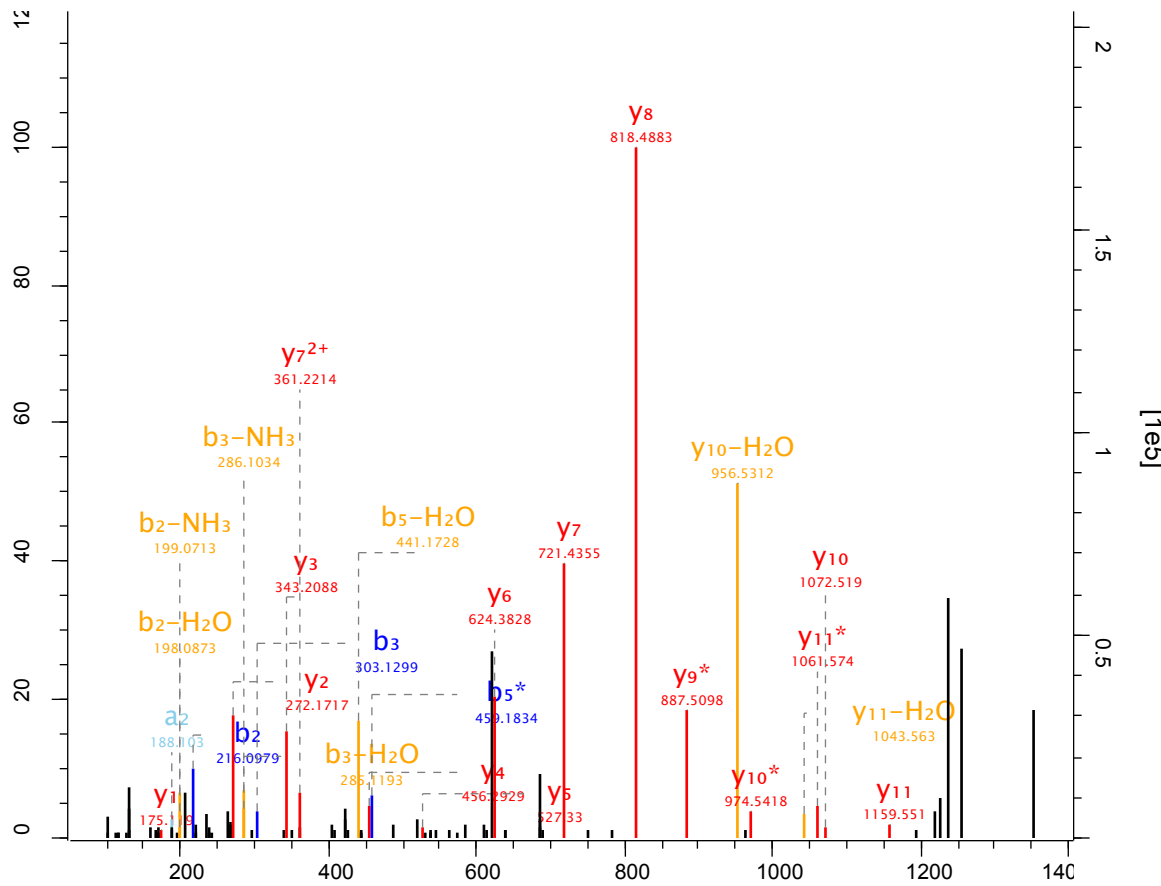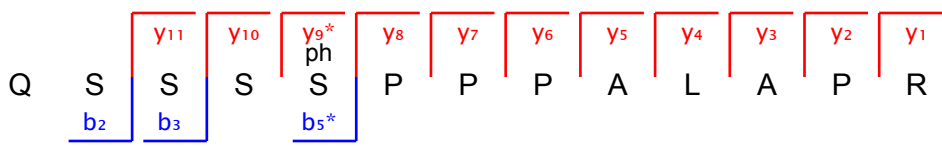

Raw file Scan Method Score m/z  
 2013\_COL15\_38\_45 8425 FTMS; HCD 69.08 602.26

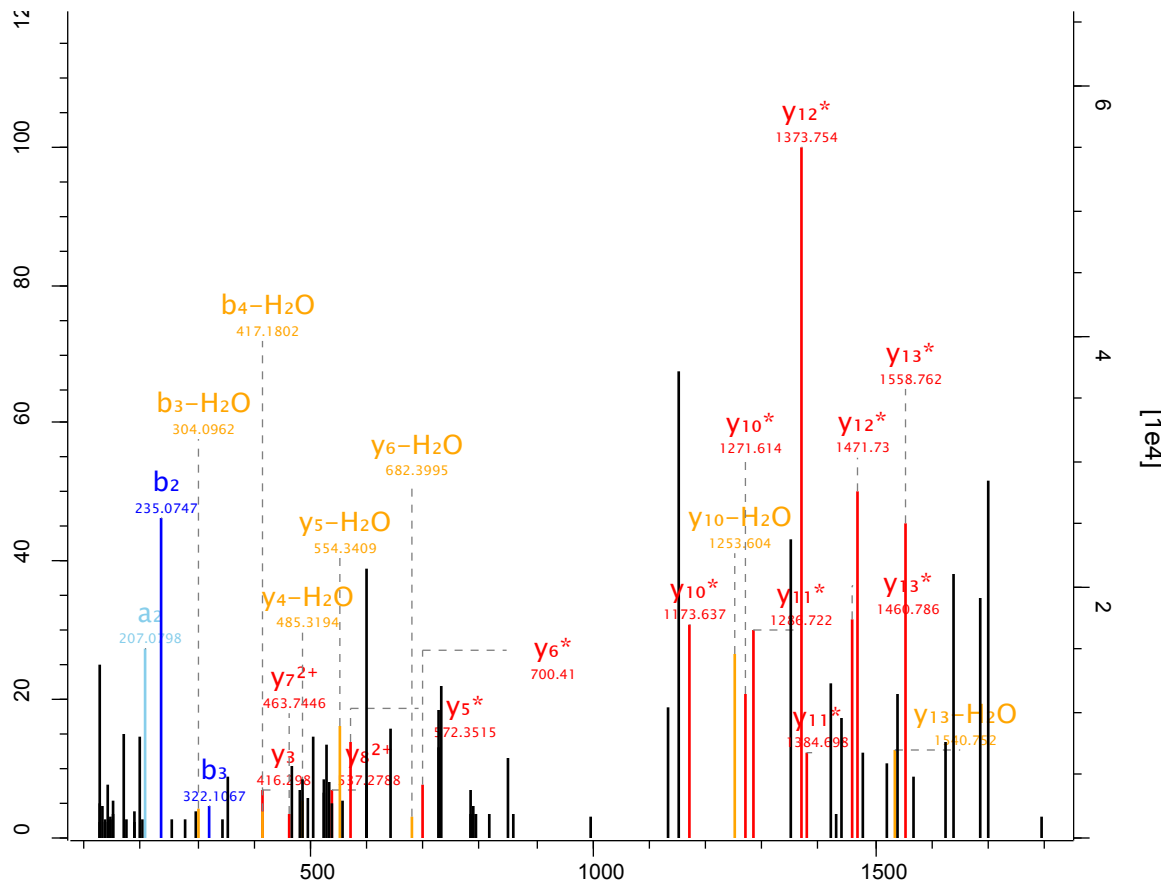

ox M y13\* y12\* y11\* y10\* ph y8<sup>2+</sup> y7<sup>2+</sup> y6\* y5\* ph S y3

- S S I E S F K Q S S L R K

- b2 b3

| Raw file         | Scan | Method    | Score | m/z    |
|------------------|------|-----------|-------|--------|
| 2013_COL15_38_45 | 8590 | FTMS; HCD | 92.61 | 469.22 |

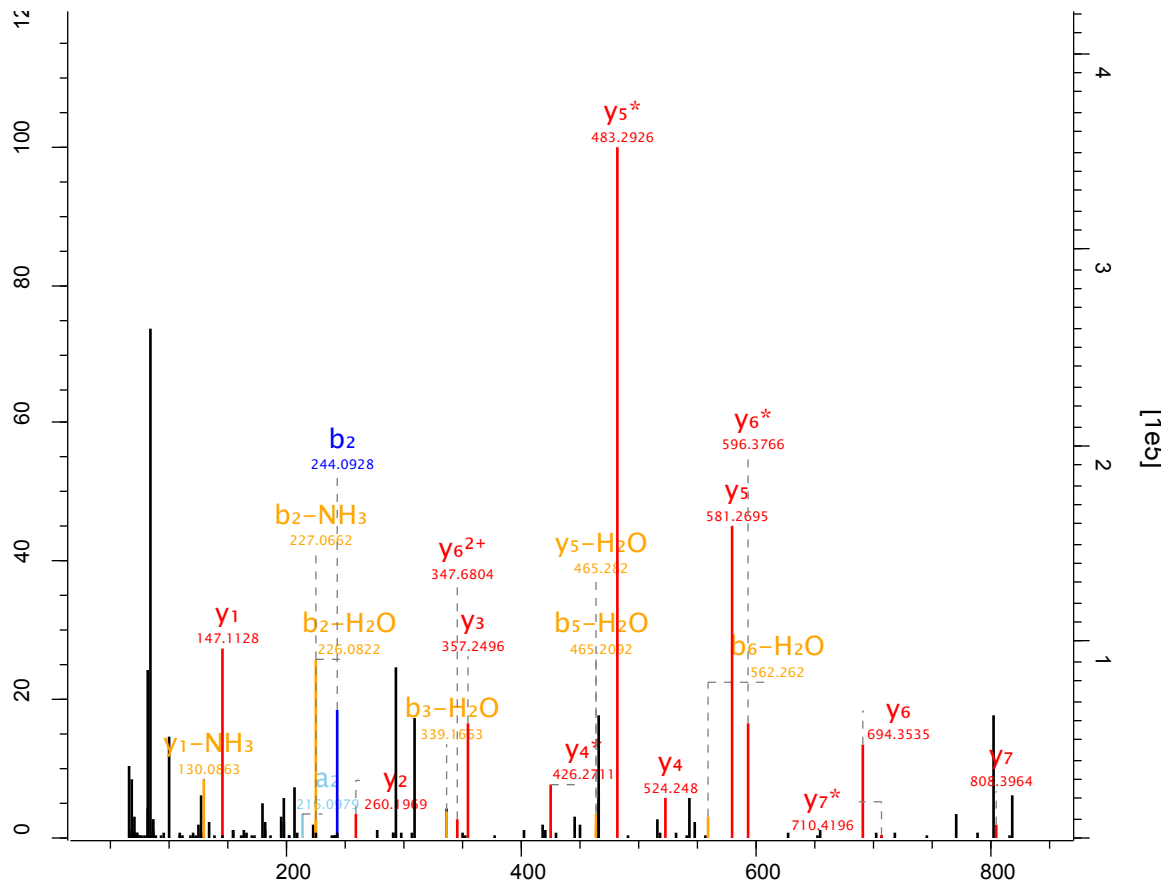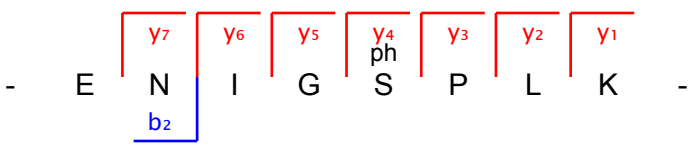

Raw file

Scan

Method

Score

m/z

2013\_COL15\_38\_45

9079

FTMS; HCD

68.84

469.2

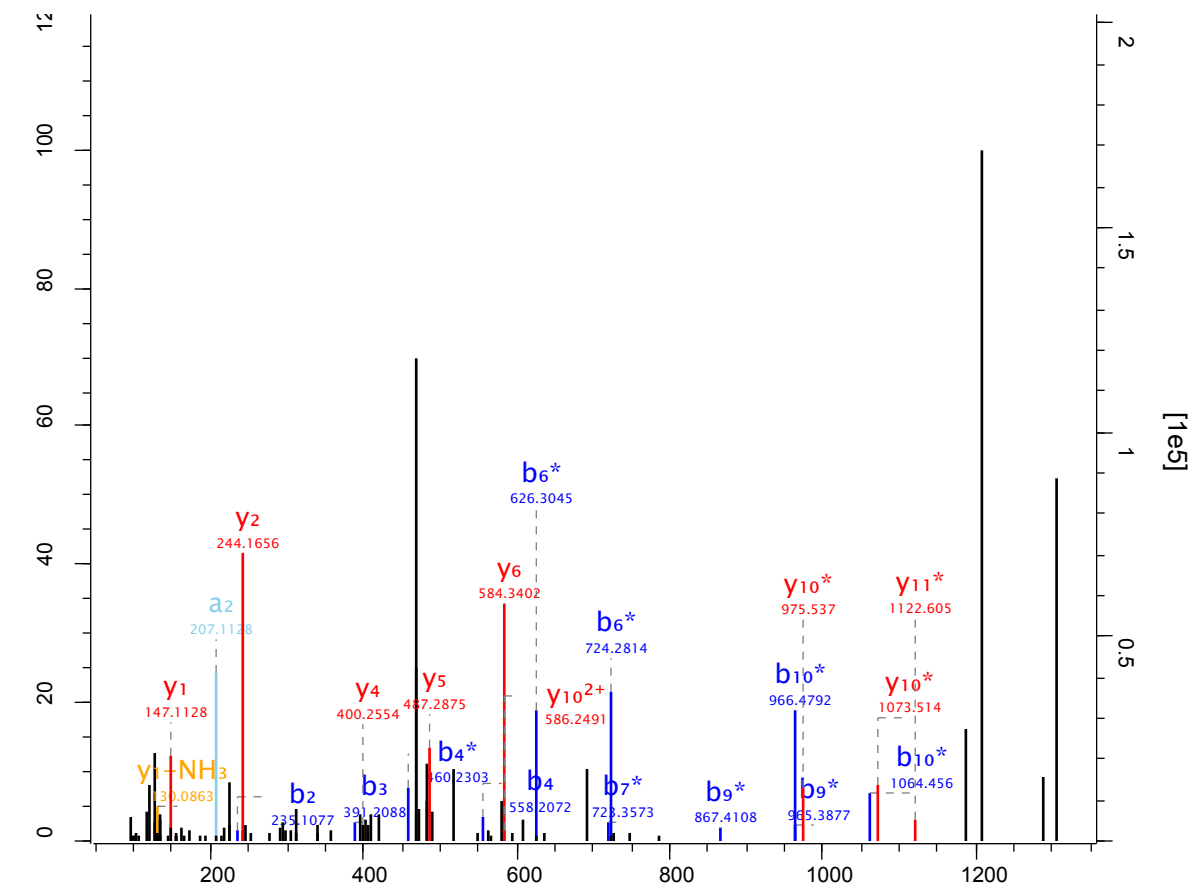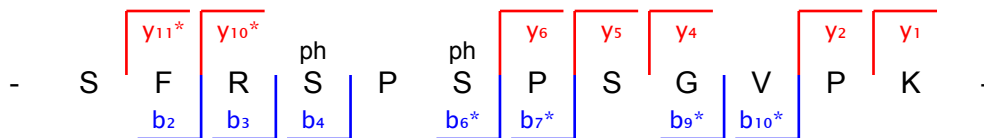

Raw file Scan Method Score m/z  
 2013\_COL15\_38\_45 9200 FTMS; HCD 128.76 672.8

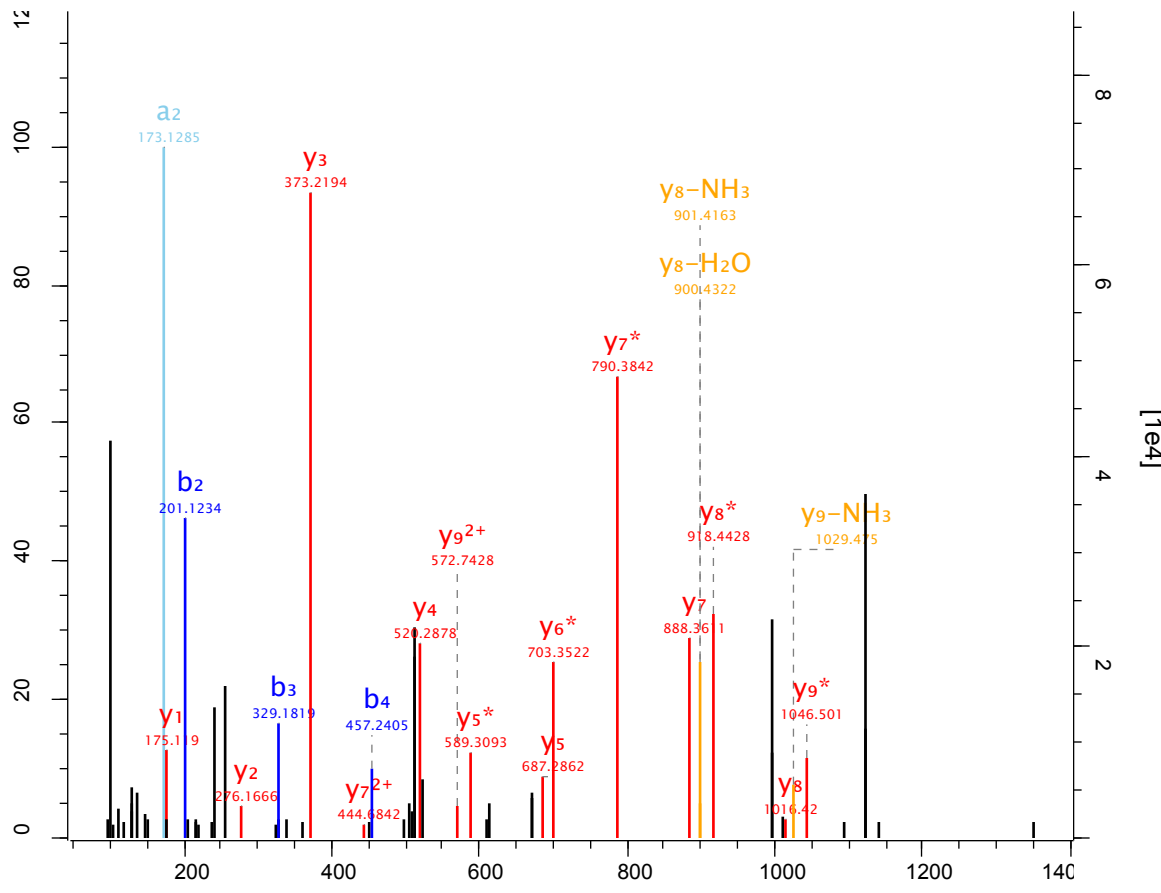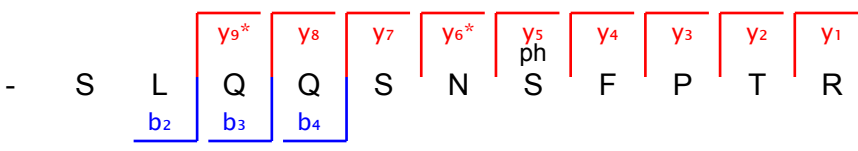

| Raw file         | Scan | Method    | Score | m/z    |
|------------------|------|-----------|-------|--------|
| 2013_COL15_38_45 | 9270 | FTMS; HCD | 63.47 | 575.74 |

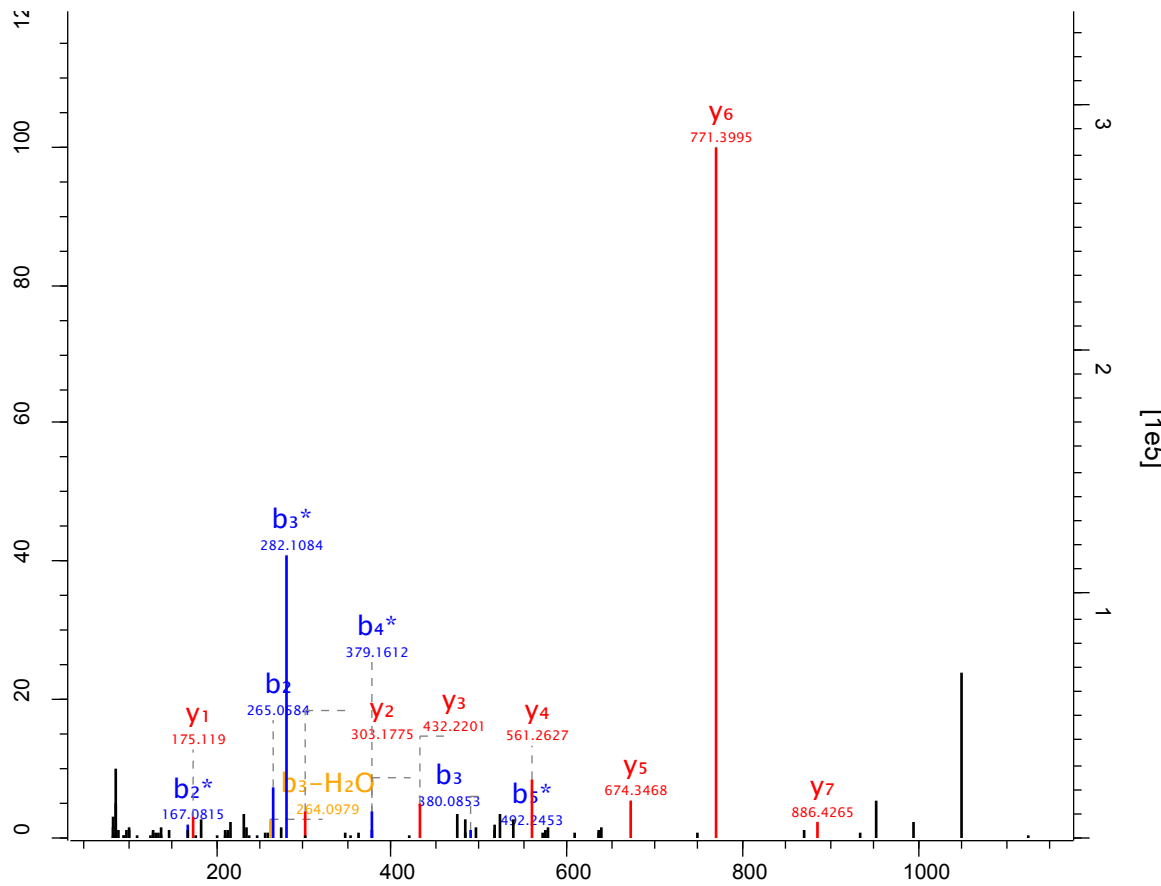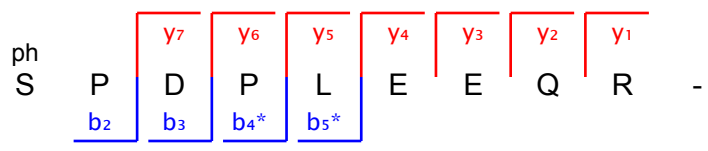

Raw file Scan Method Score m/z  
 2013\_COL15\_38\_45 9810 FTMS; HCD 80.39 662.79

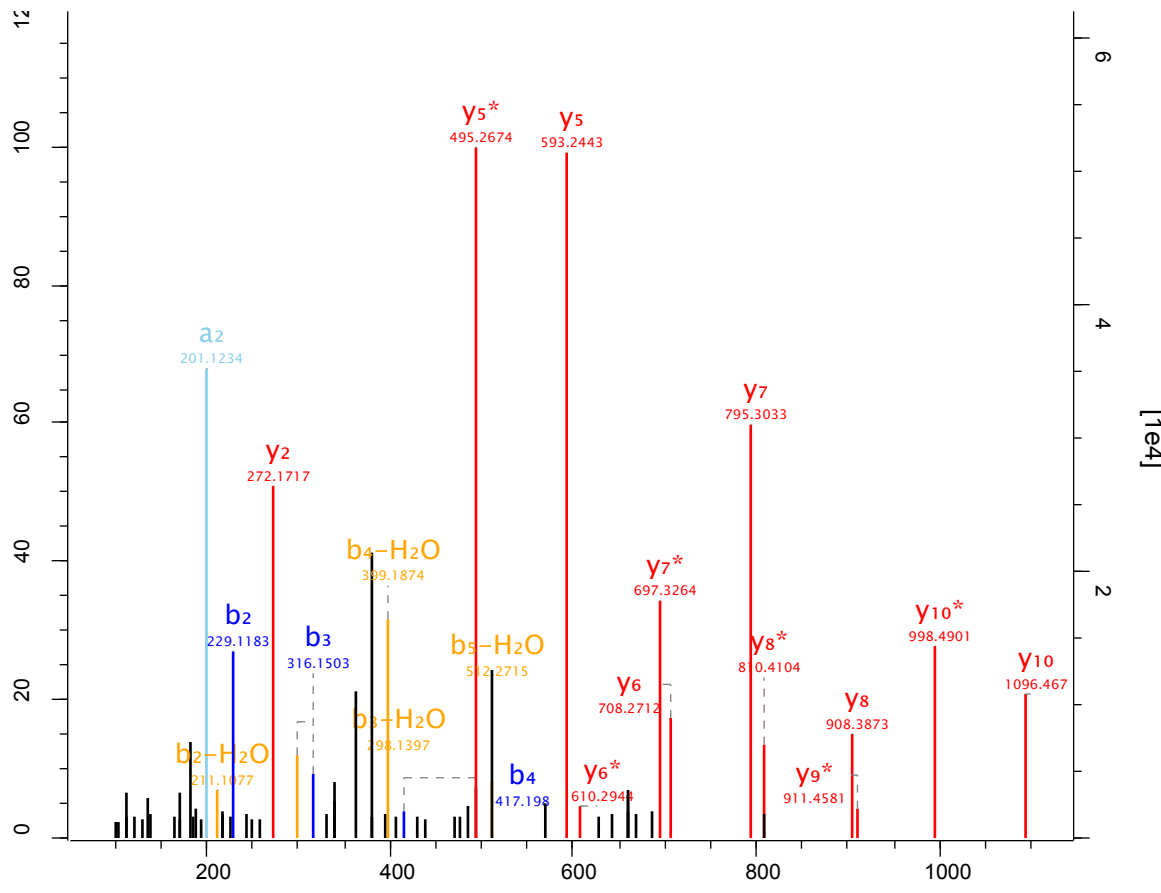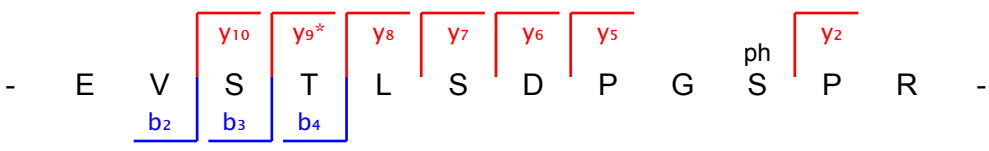



Raw file Scan Method Score m/z  
 2013\_COL15\_38\_45 9851 FTMS; HCD 101.07 566.25

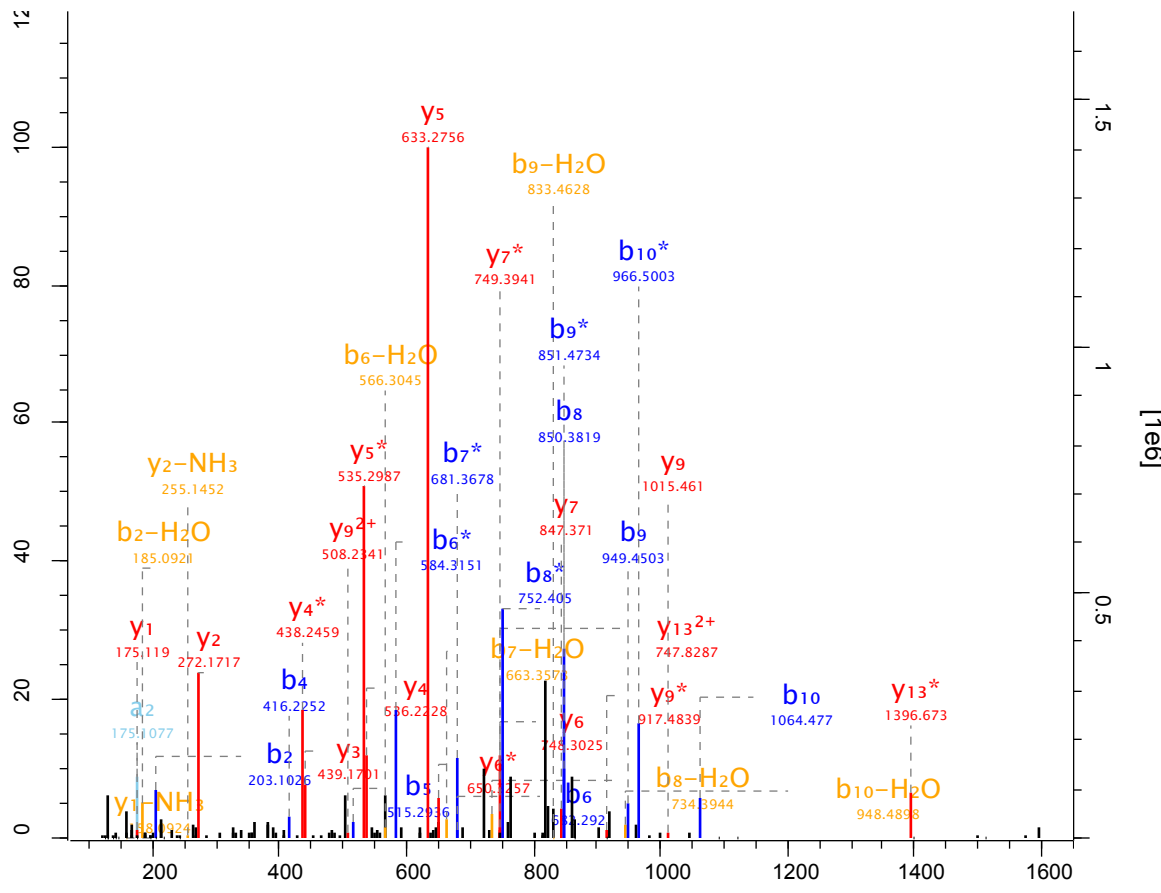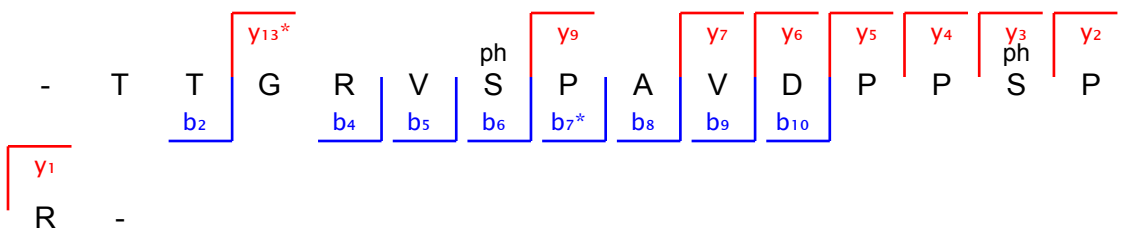

| Raw file           | Scan | Method    | Score | m/z    |
|--------------------|------|-----------|-------|--------|
| 201502_COL14_25_30 | 2105 | FTMS; HCD | 50.7  | 495.71 |

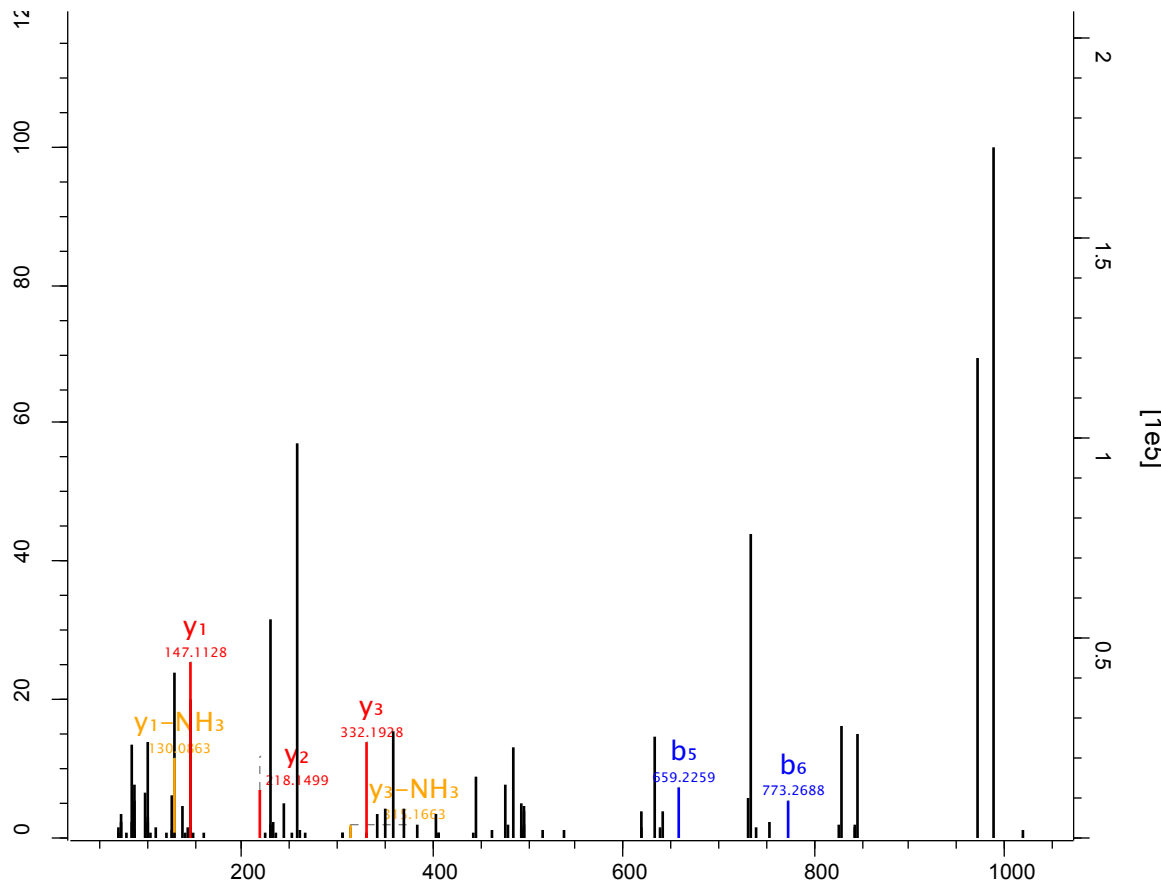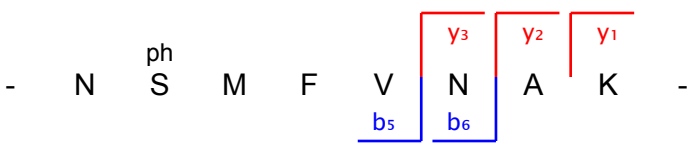

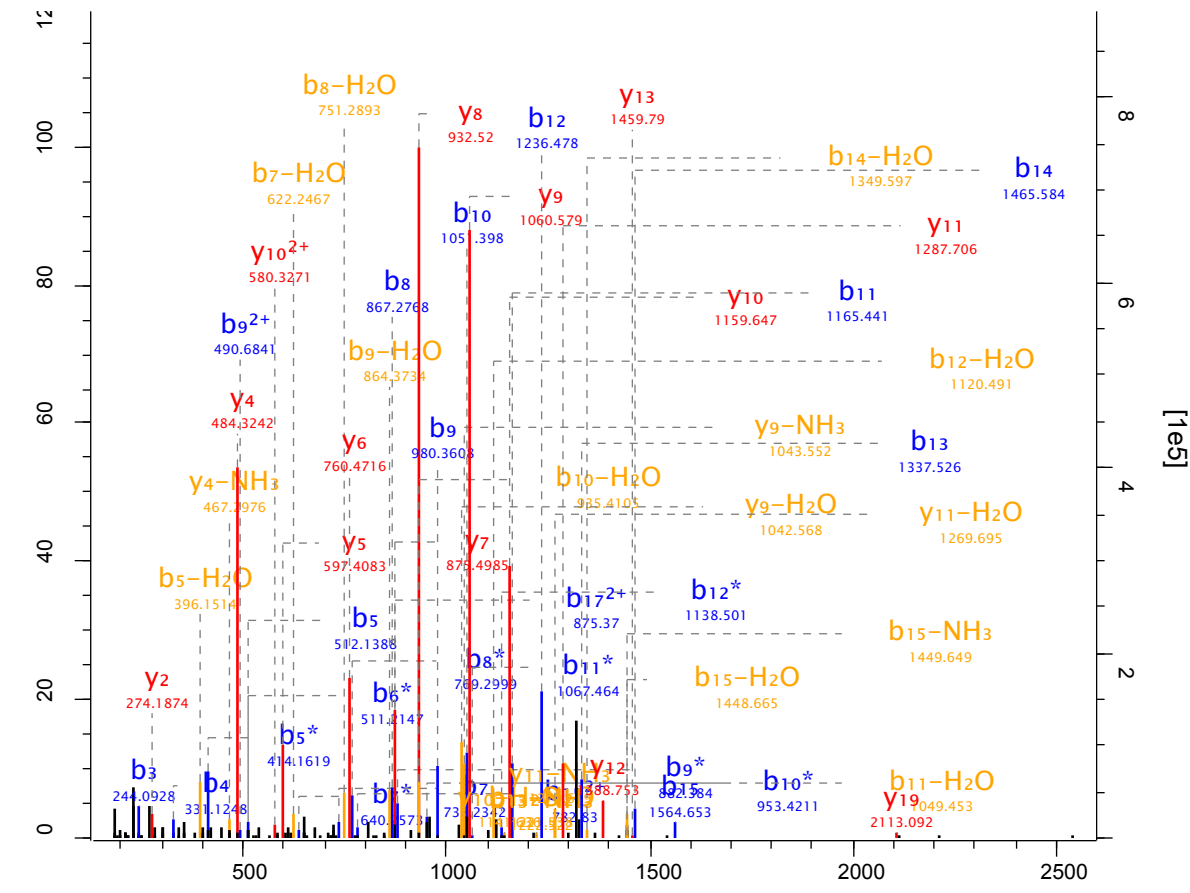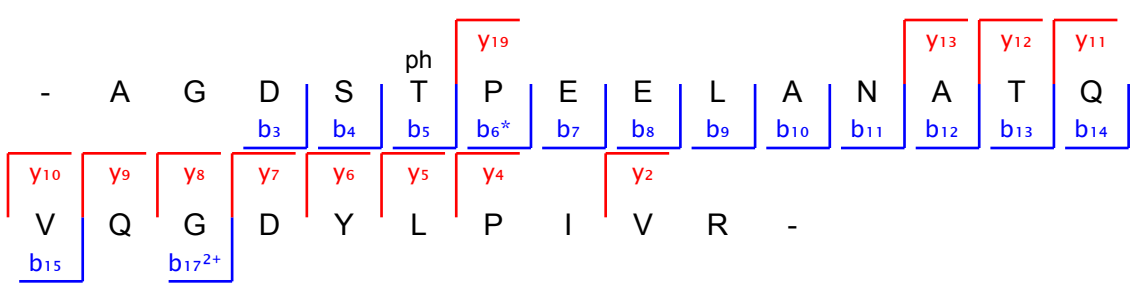

Raw file Scan Method Score m/z  
 201502\_COL14\_25\_30 2786 FTMS; HCD 43.08 499.23

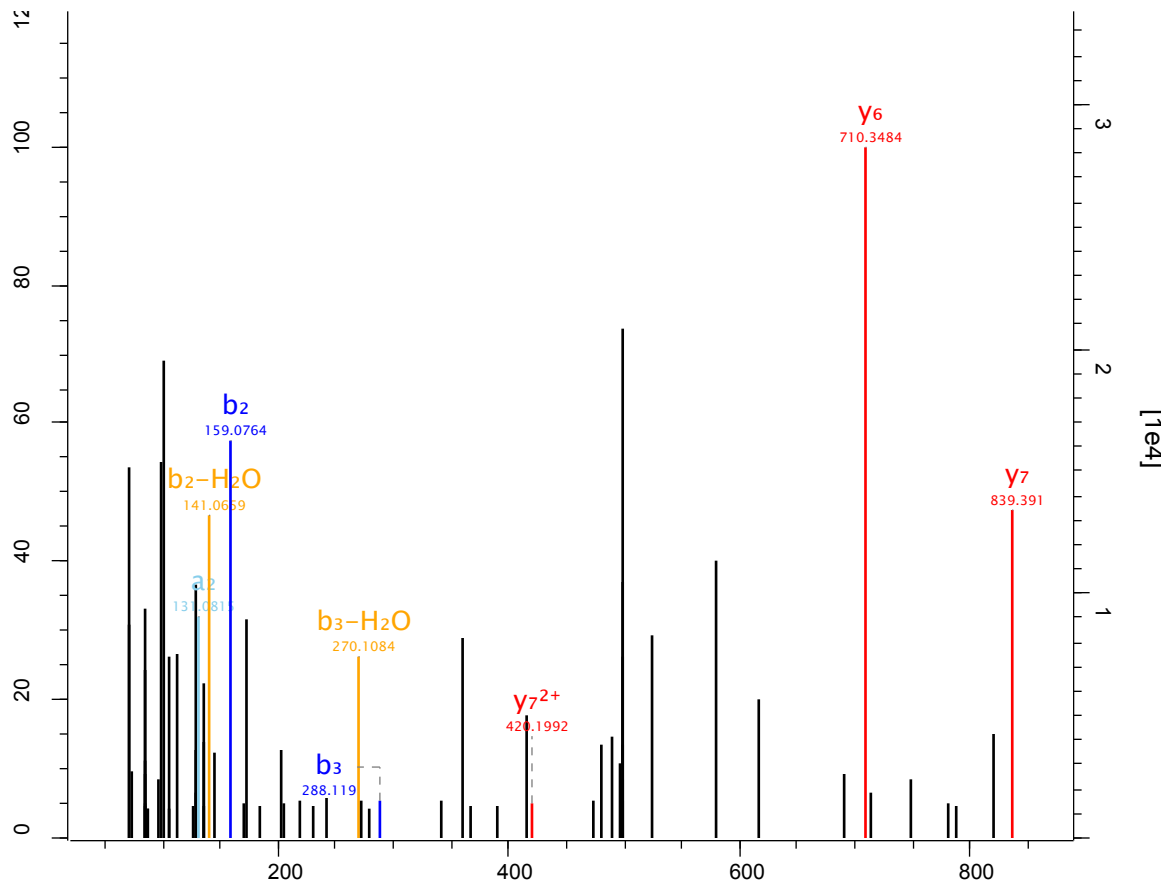

- A S E S V L P S K -  
 b<sub>2</sub> b<sub>3</sub> y<sub>7</sub> y<sub>6</sub> ph

Raw file 201502\_COL14\_25\_30 Scan 33421 Method FTMS; HCD Score 150.4 m/z 1217.97

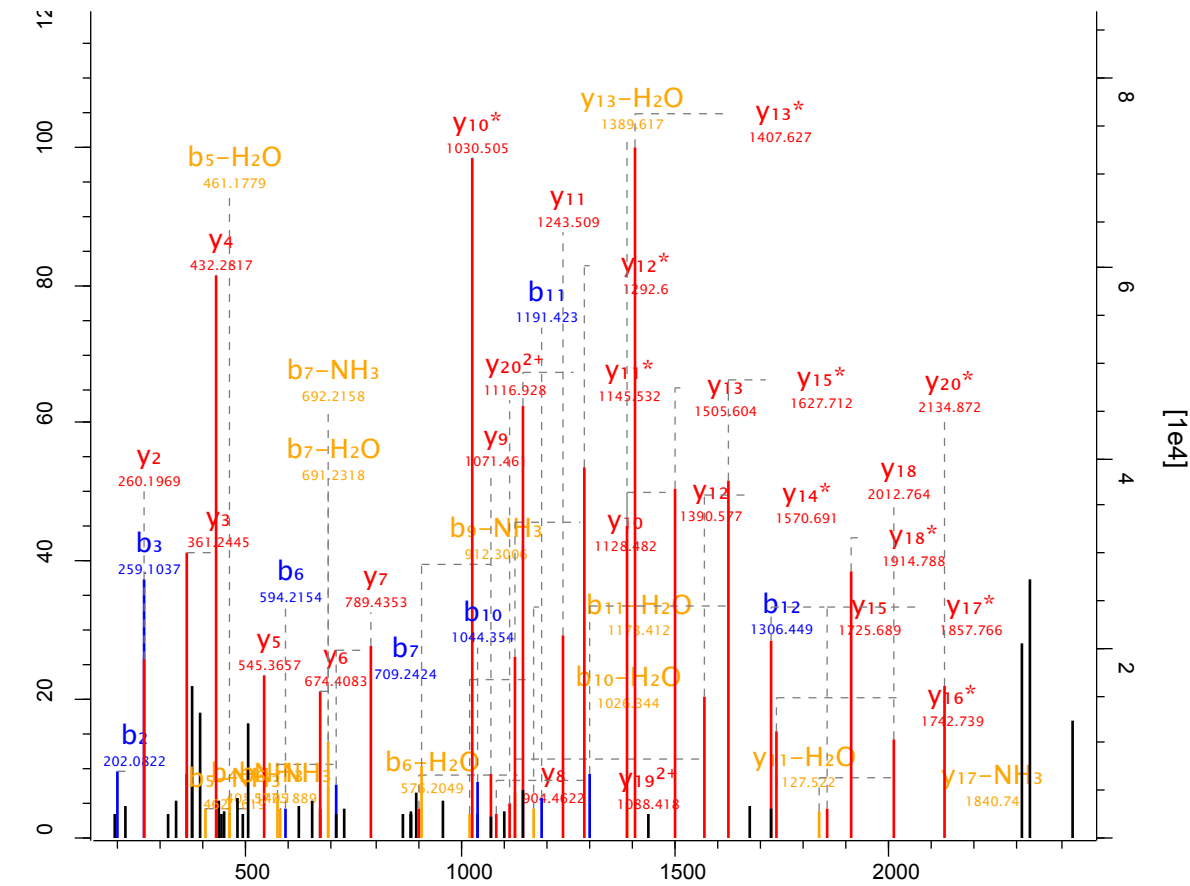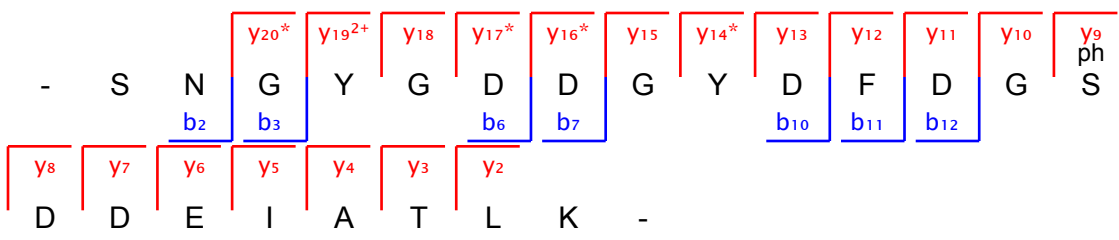

| Raw file           | Scan | Method    | Score | m/z    |
|--------------------|------|-----------|-------|--------|
| 201502_COL14_34_38 | 2181 | FTMS; HCD | 52.4  | 495.71 |

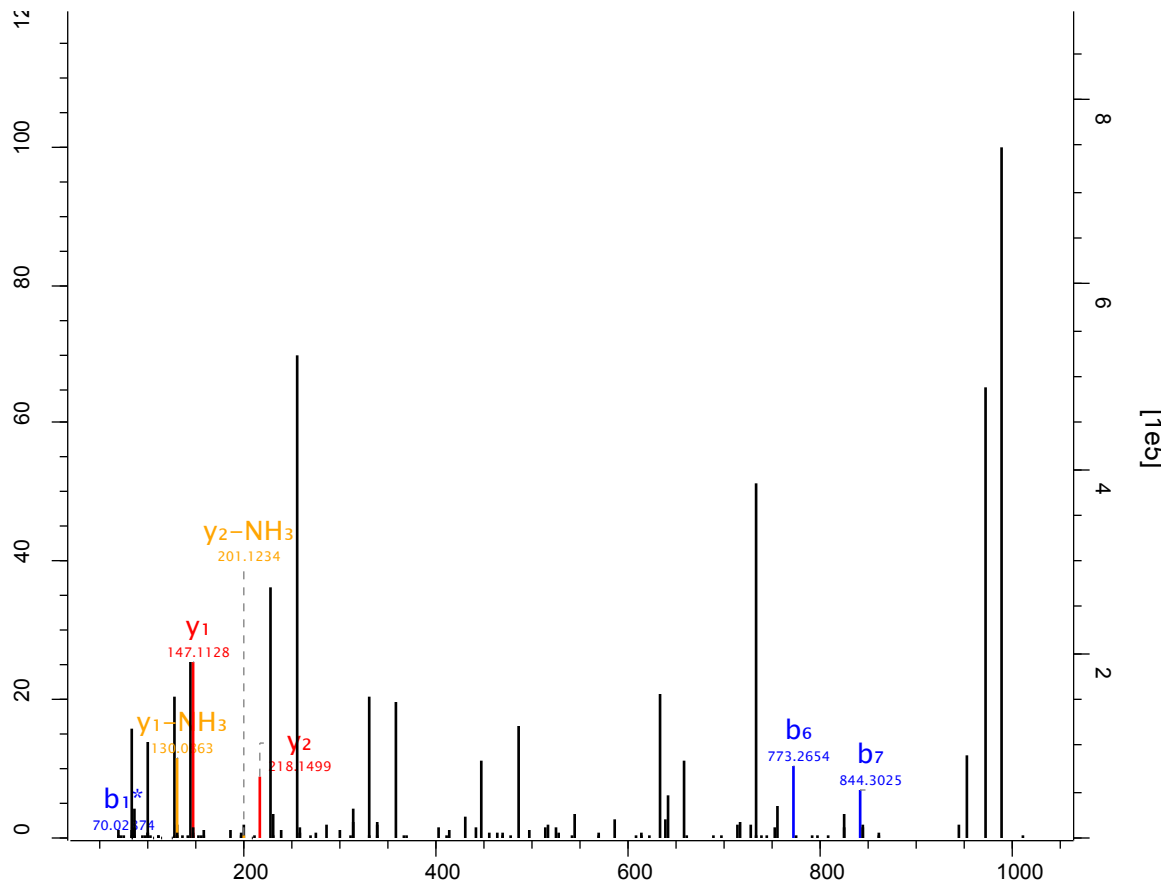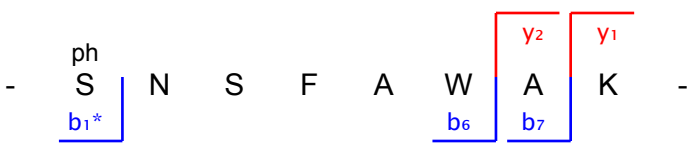

Raw file 201502\_COL14\_34\_38 Scan 21905 Method FTMS; HCD Score 154.55 m/z 736.79

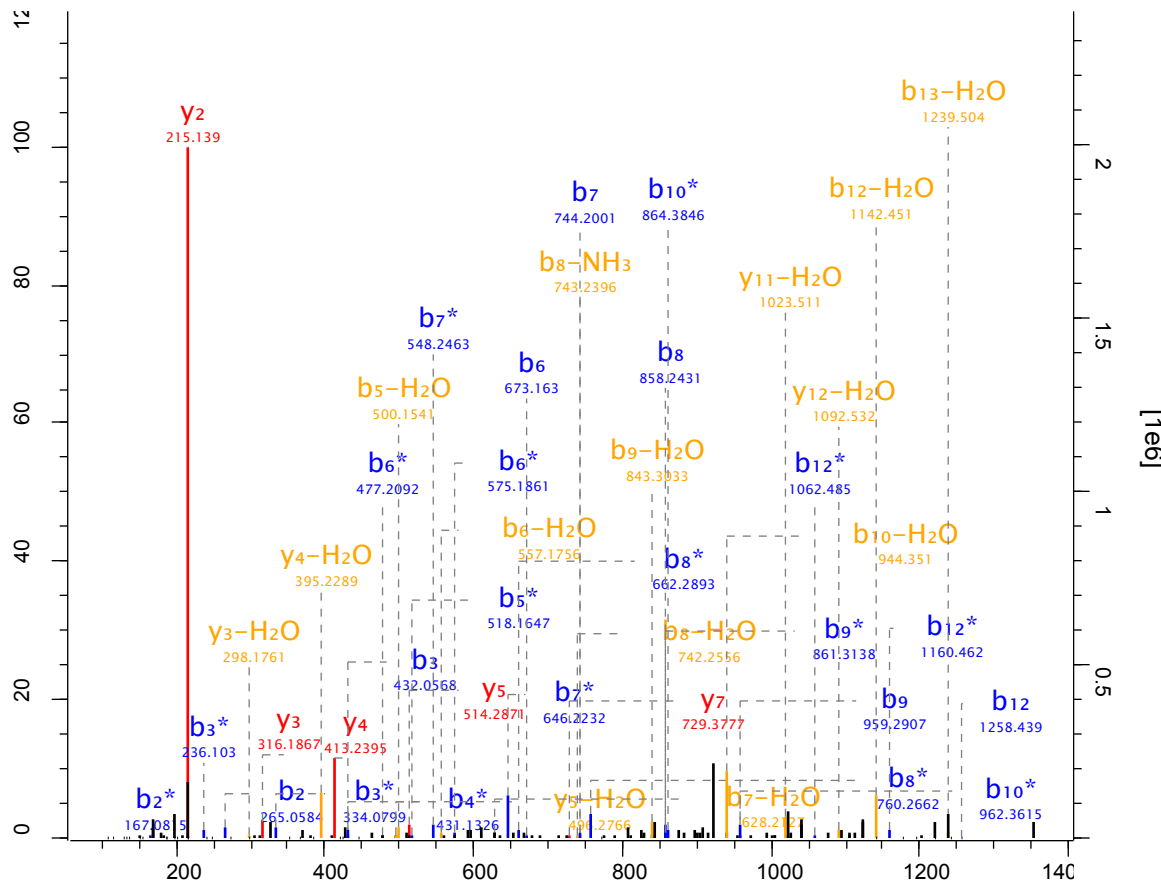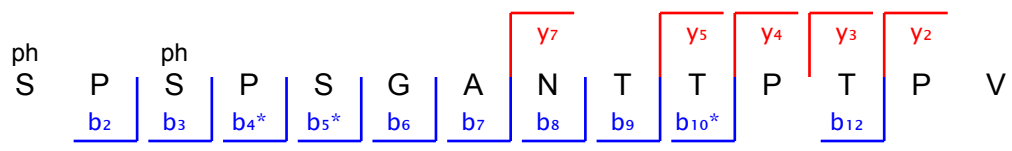

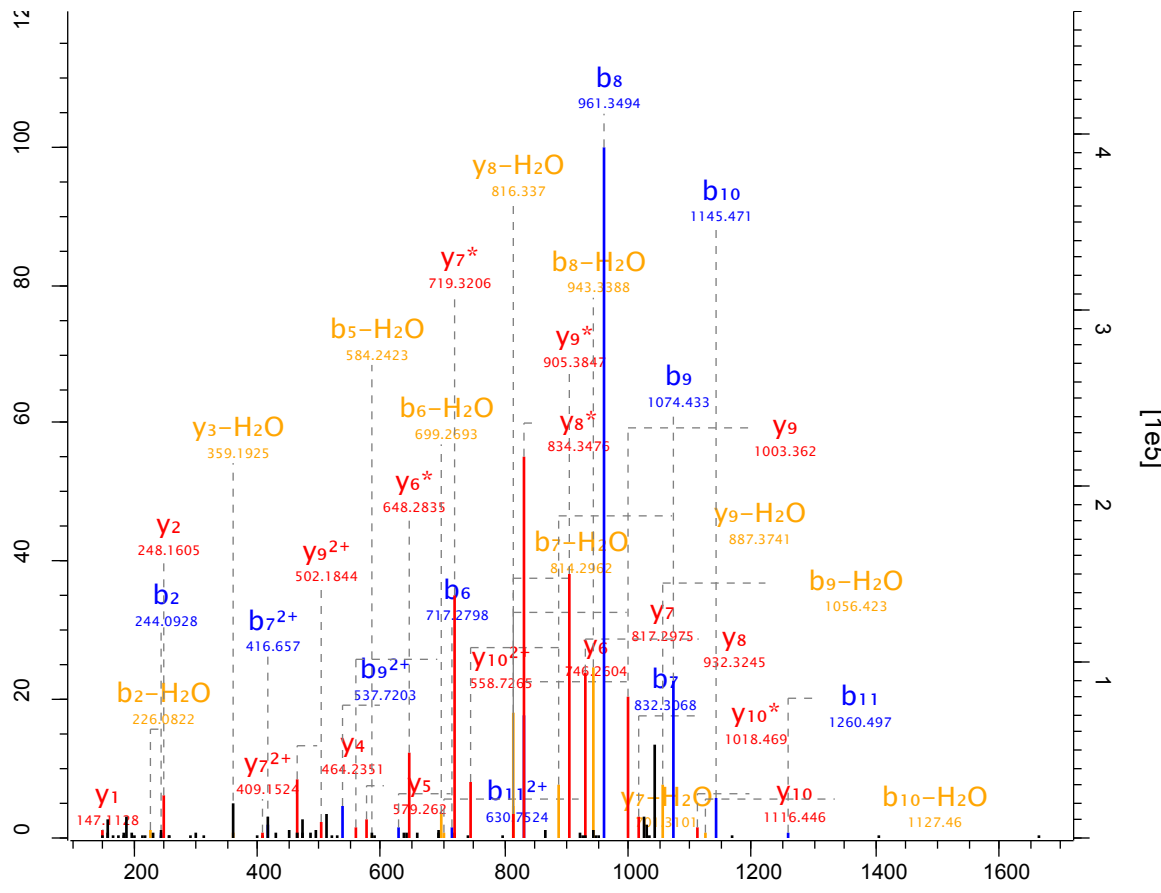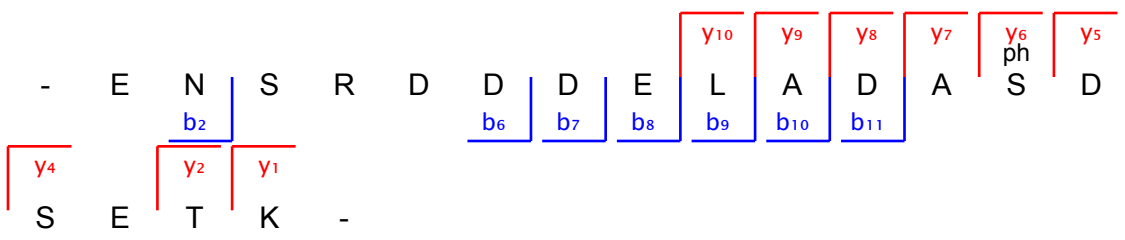



Raw file Scan Method Score m/z  
 201502\_COL14\_38\_45 10029 FTMS; HCD 63.19 730.83

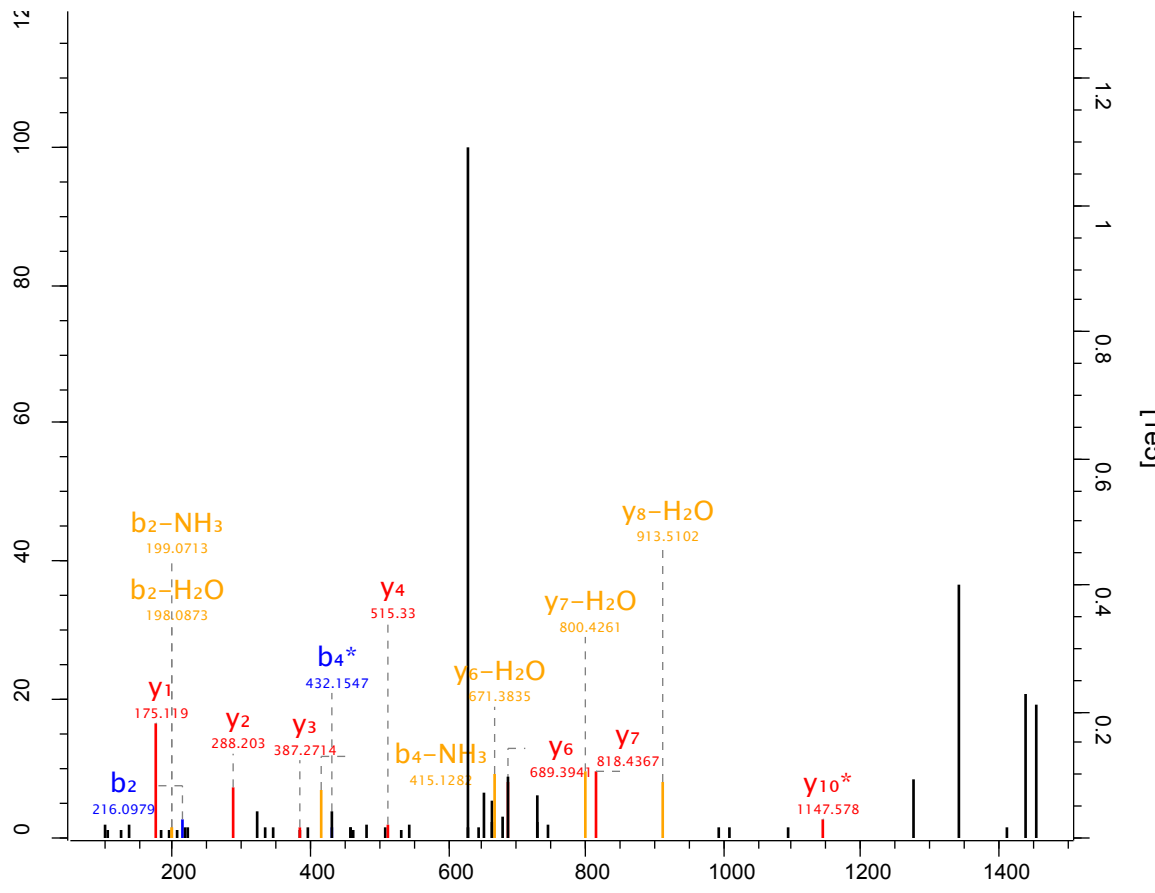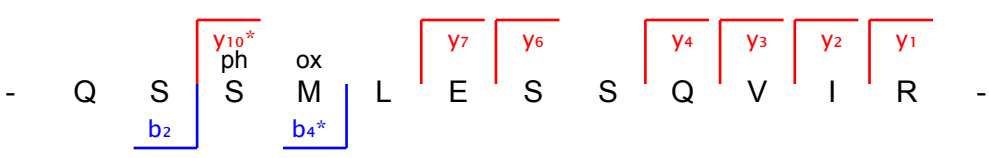

Raw file Scan Method Score m/z  
 201502\_COL14\_38\_45 10144 FTMS; HCD 200.69 786.83

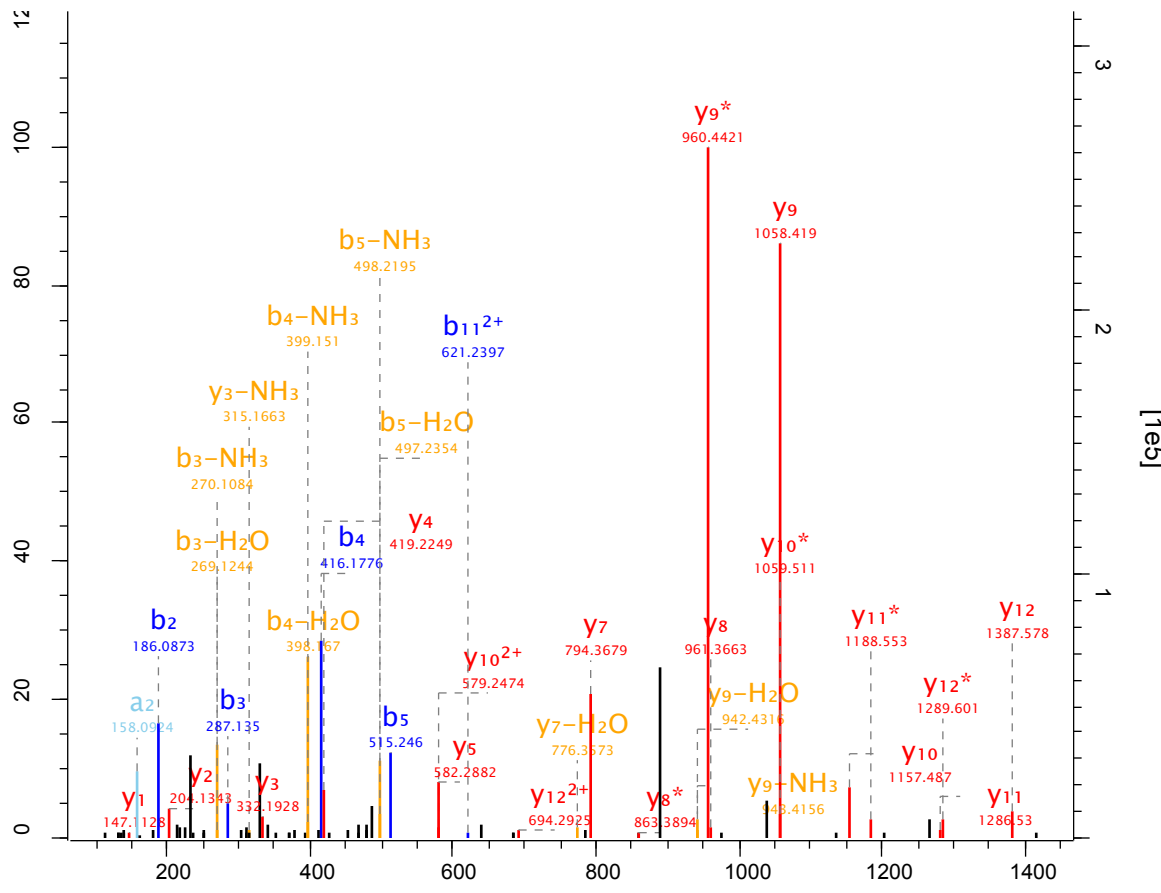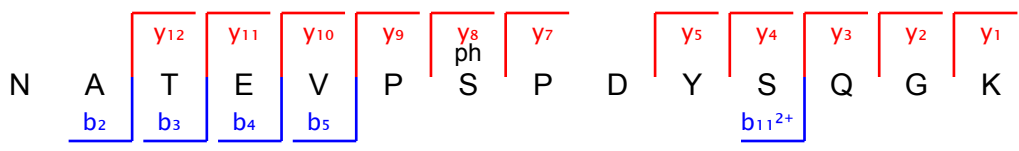

Raw file 201502\_COL14\_38\_45 Scan 1059 Method FTMS; HCD Score 80.59 m/z 583.23

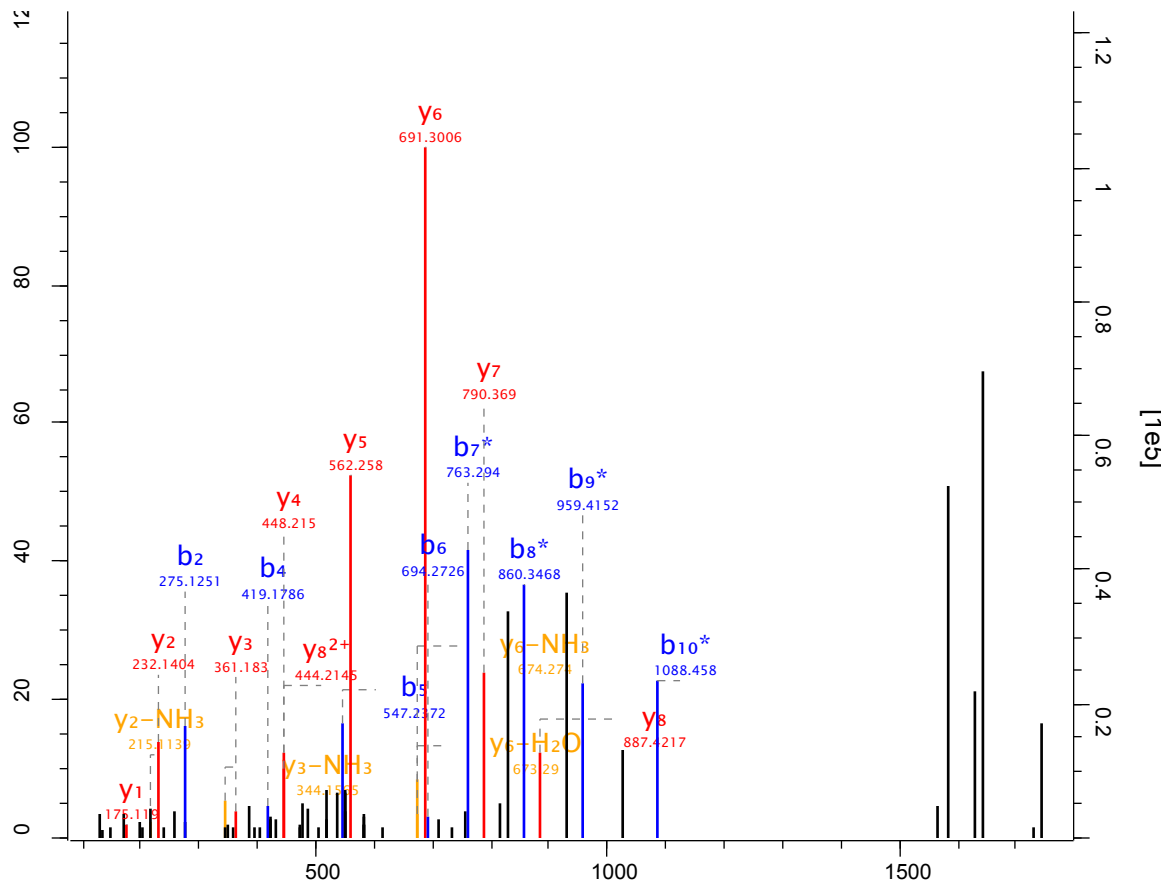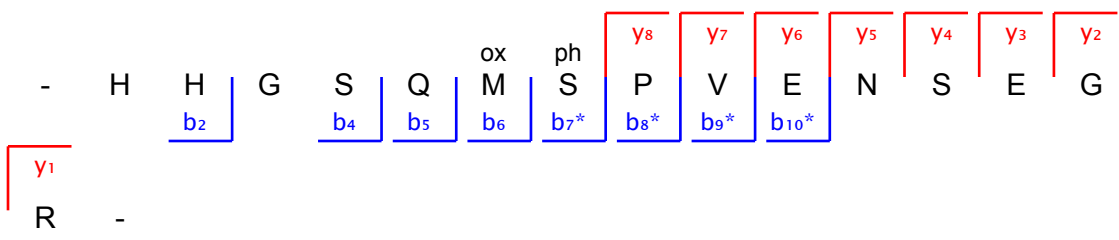

Raw file 201502\_COL14\_38\_45 Scan 1069 Method FTMS; HCD Score 66.25 m/z 451.87

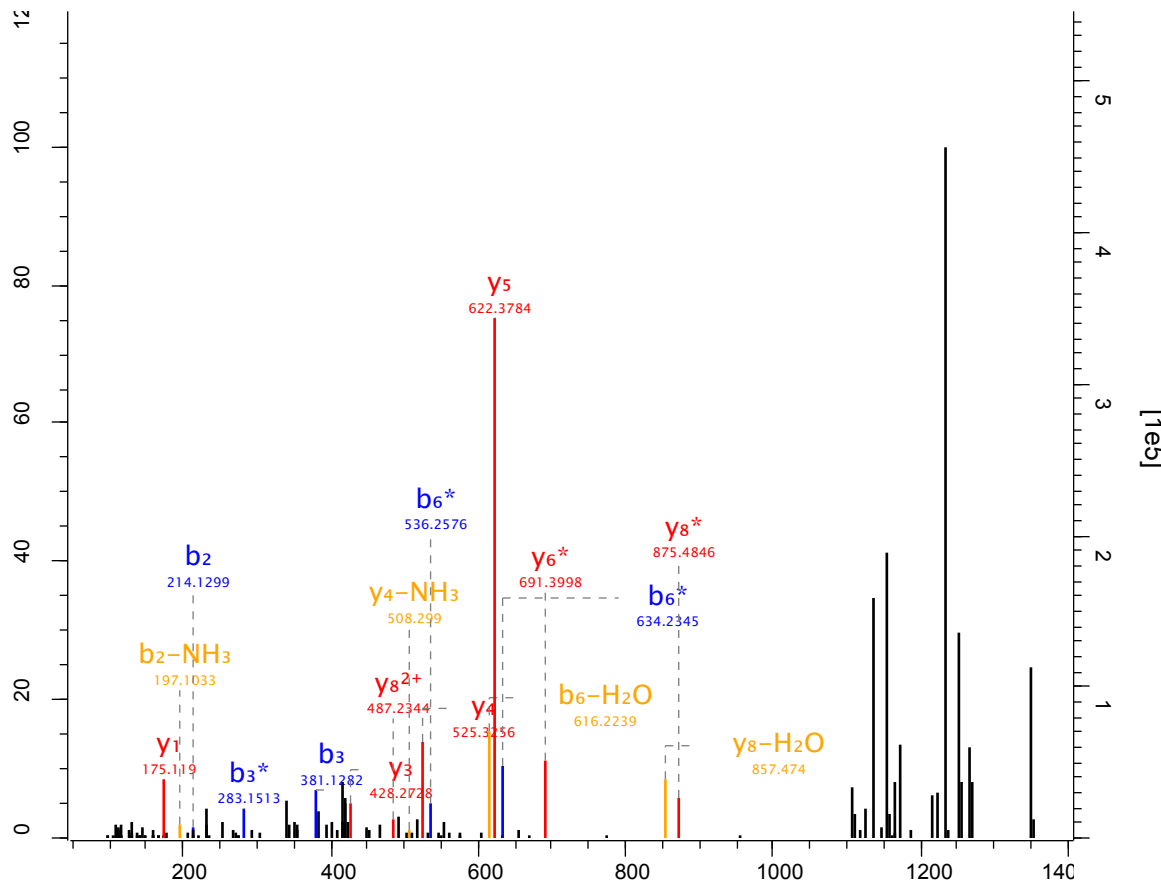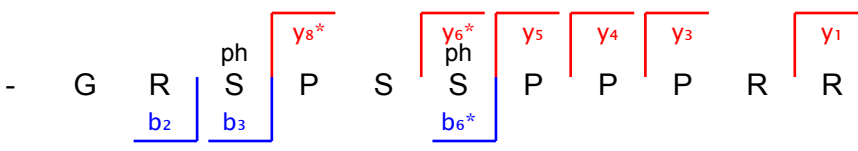

Raw file Scan Method Score m/z  
 201502\_COL14\_38\_45 11153 FTMS; HCD 56.2 595.28

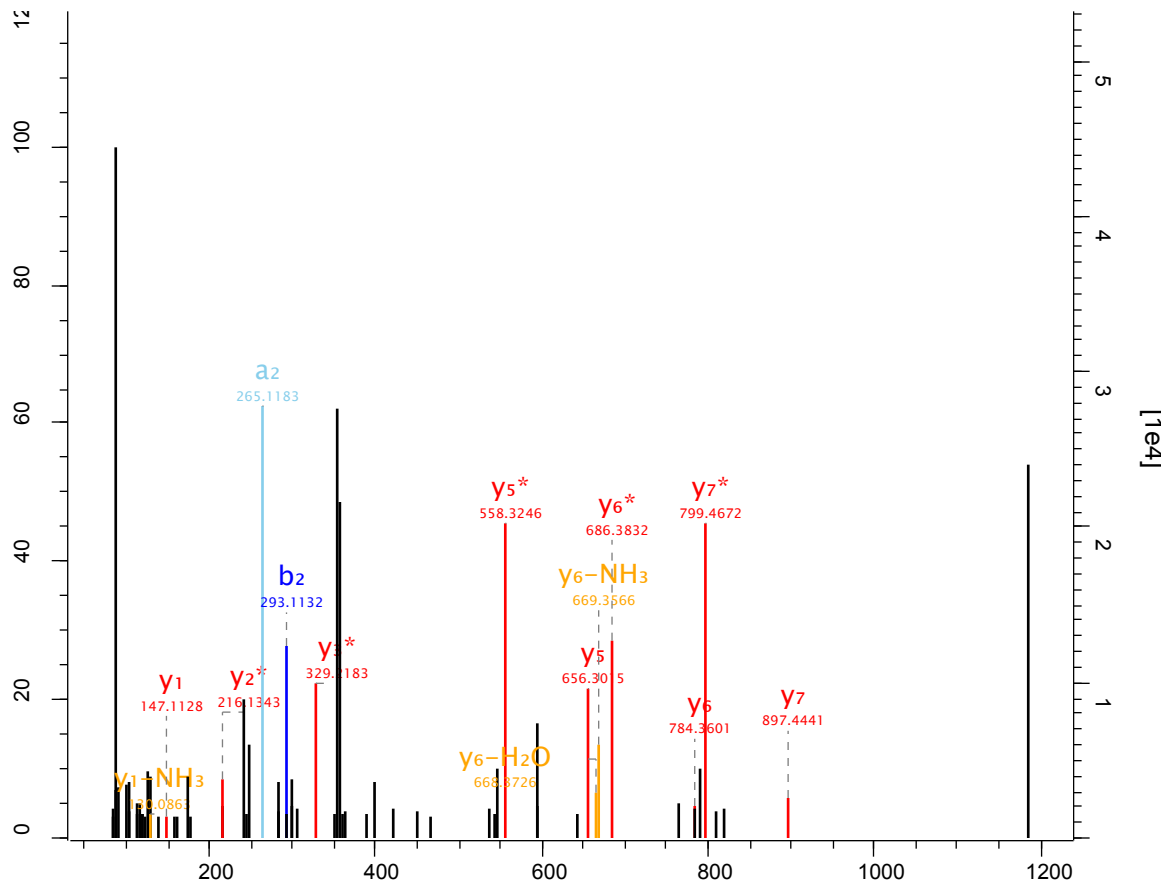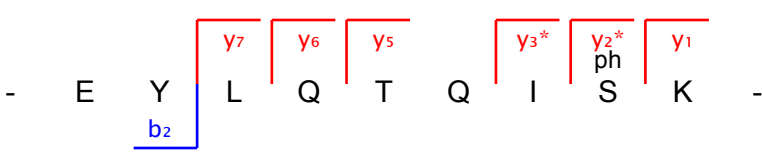

Raw file Scan Method Score m/z  
 201502\_COL14\_38\_45 11248 FTMS; HCD 142.88 878.82

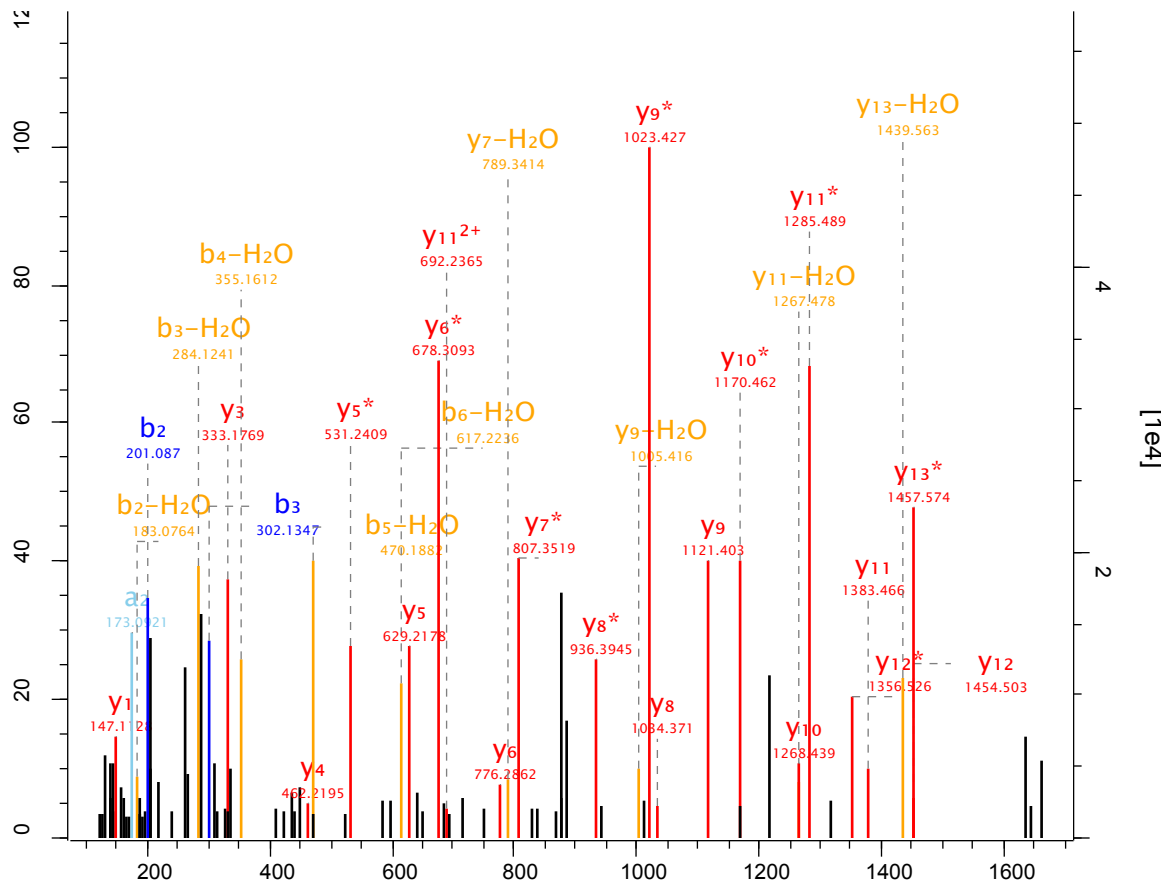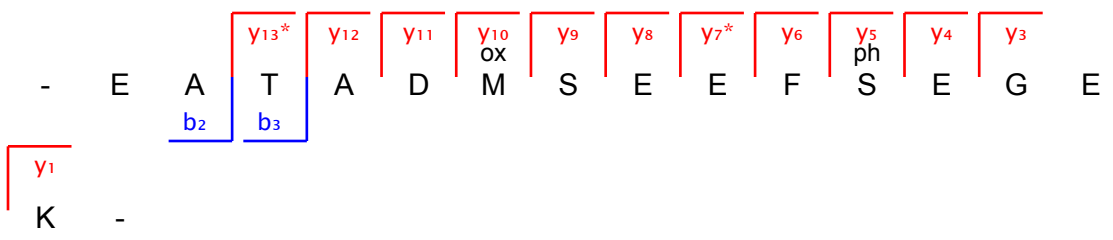

Raw file 201502\_COL14\_38\_45 Scan 11454 Method FTMS; HCD Score 67.4 m/z 891.06

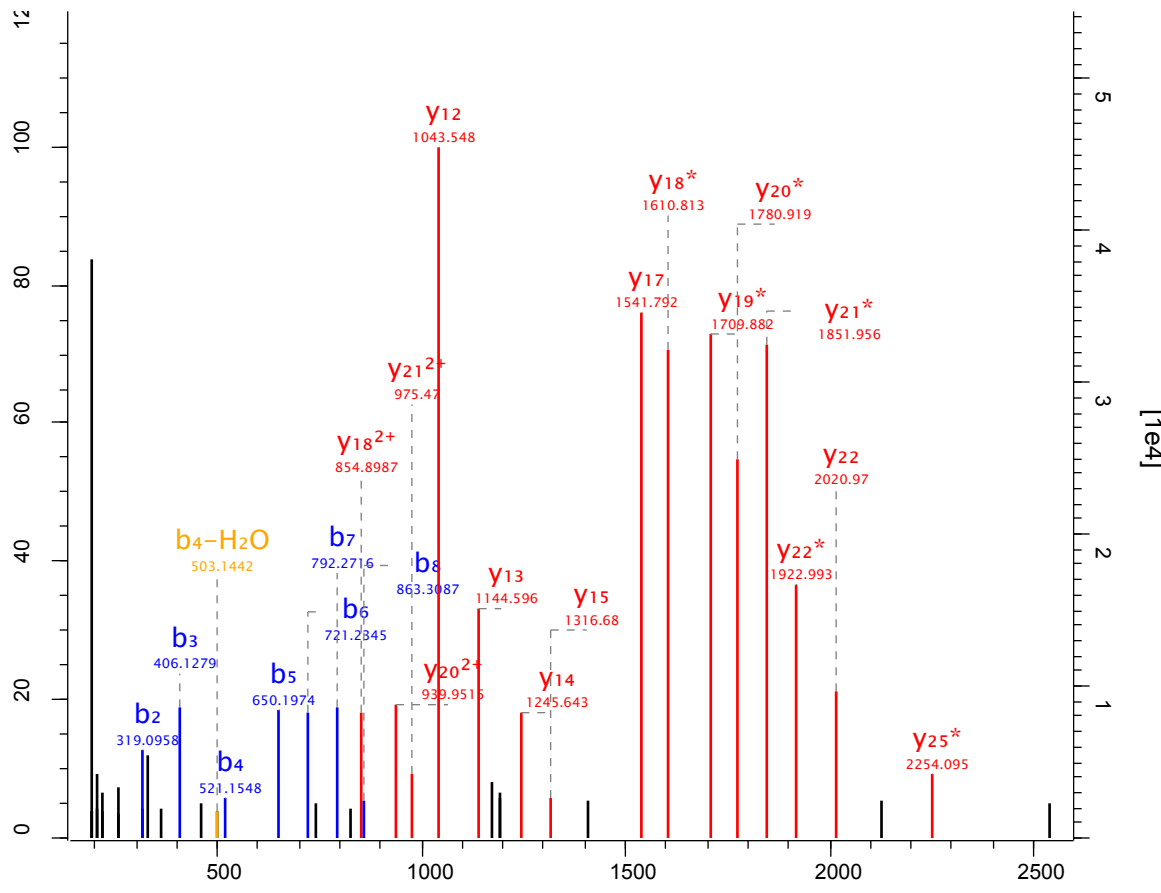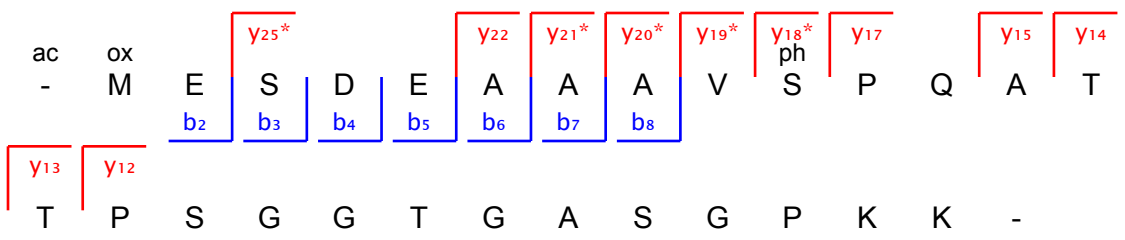

Raw file Scan Method Score m/z  
 201502\_COL14\_38\_45 11771 FTMS; HCD 68.03 577.21

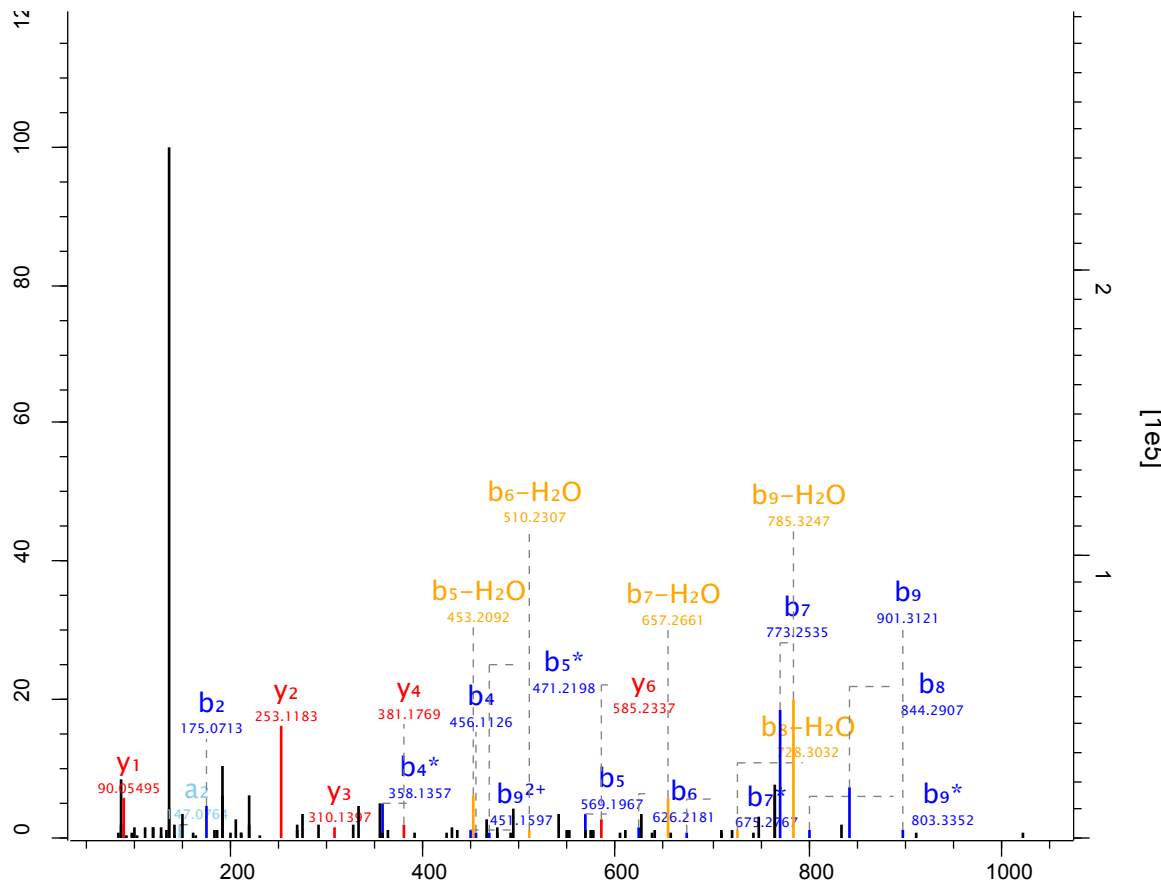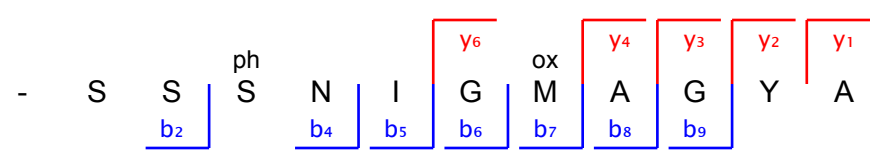



Raw file Scan Method Score m/z  
 201502\_COL14\_38\_45 12033 FTMS; HCD 83.76 740.79

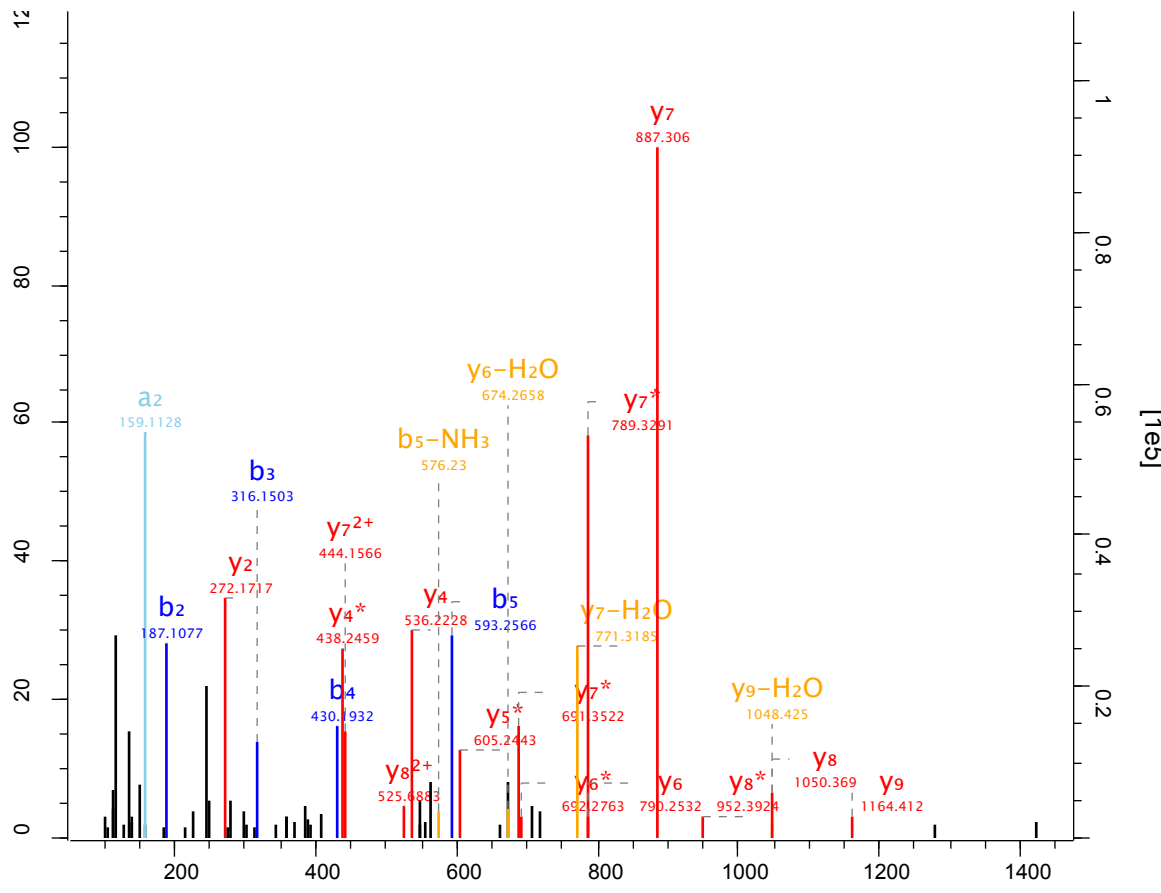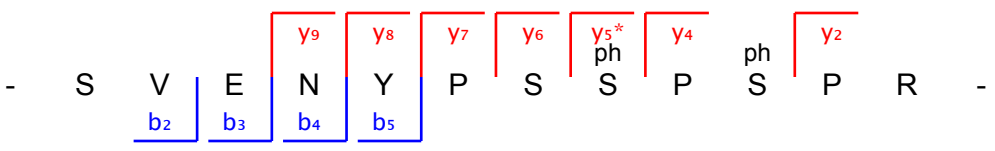

| Raw file           | Scan | Method    | Score | m/z    |
|--------------------|------|-----------|-------|--------|
| 201502_COL14_38_45 | 1211 | FTMS; HCD | 61.48 | 558.73 |

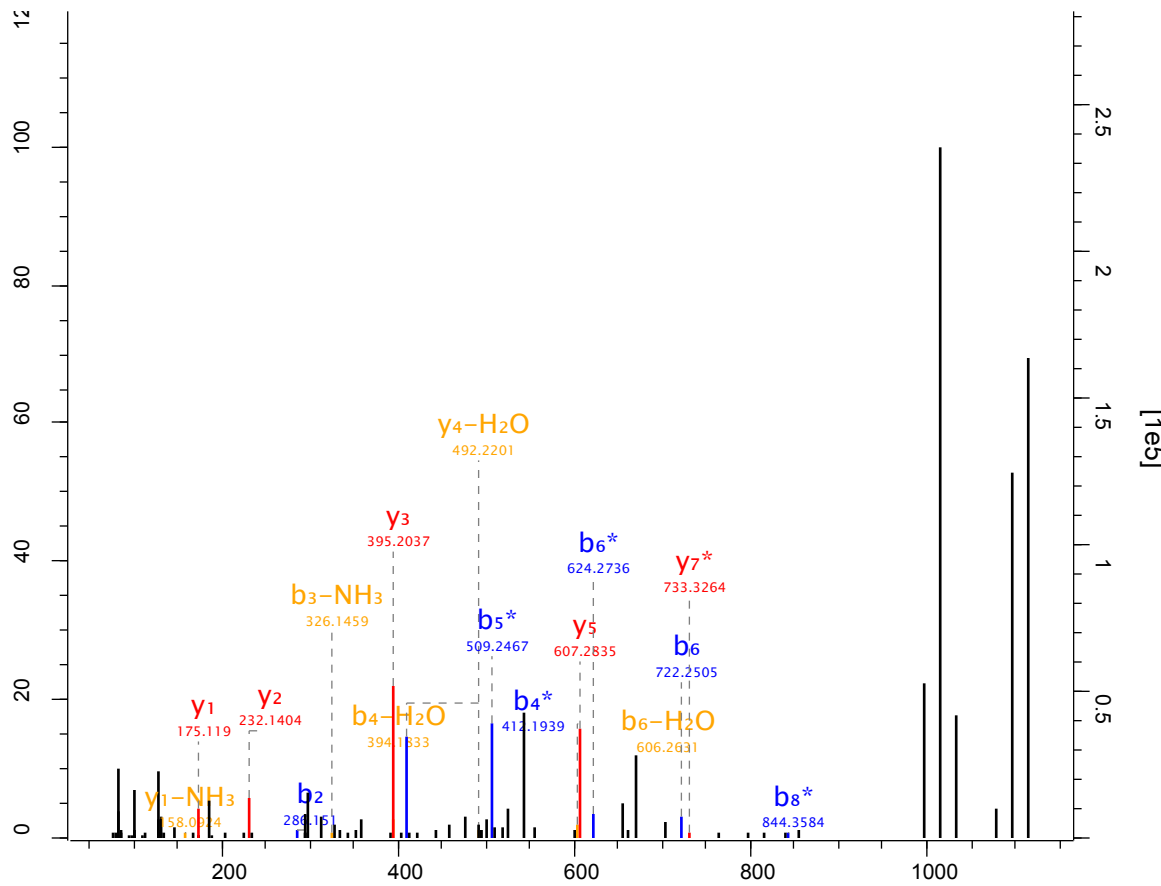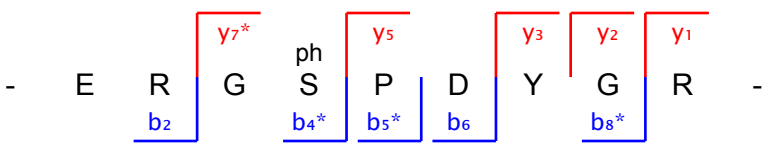

Raw file 201502\_COL14\_38\_45 Scan 1279 Method FTMS; HCD Score 112.34 m/z 522.53

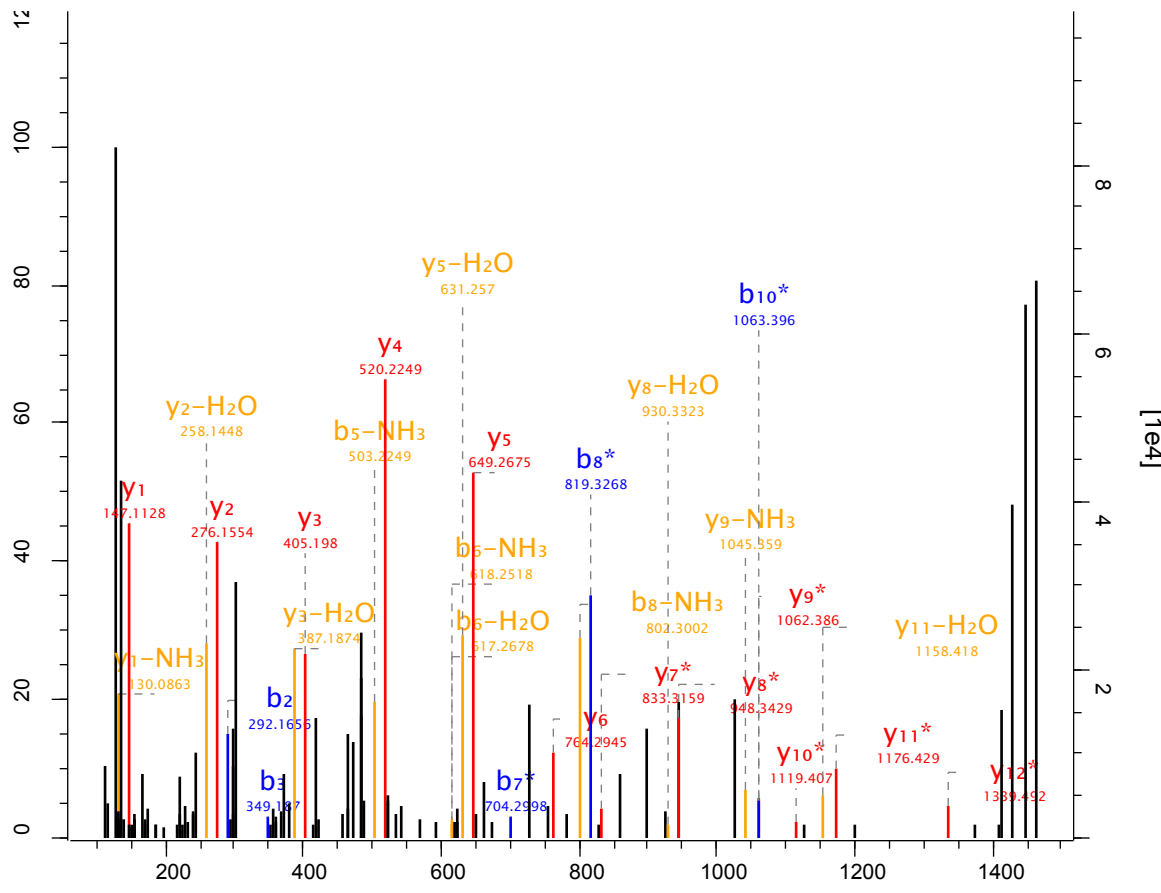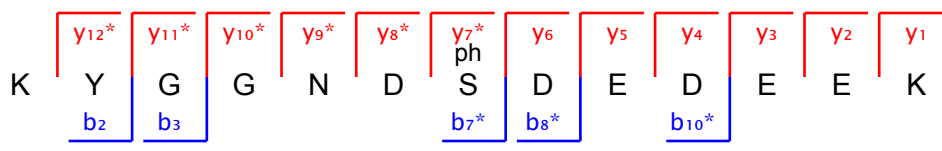

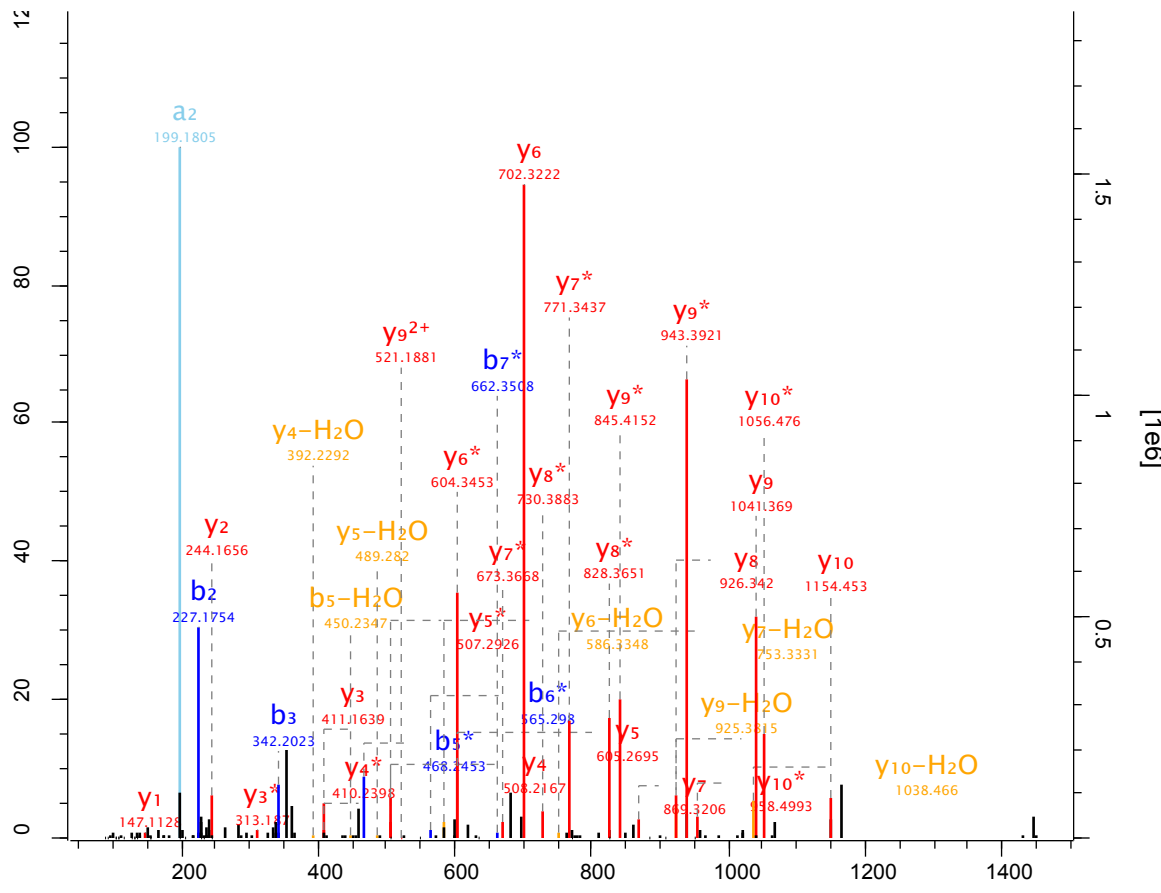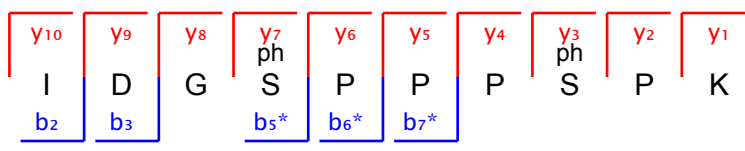

| Raw file           | Scan | Method    | Score | m/z    |
|--------------------|------|-----------|-------|--------|
| 201502_COL14_38_45 | 1367 | FTMS; HCD | 50.15 | 496.87 |

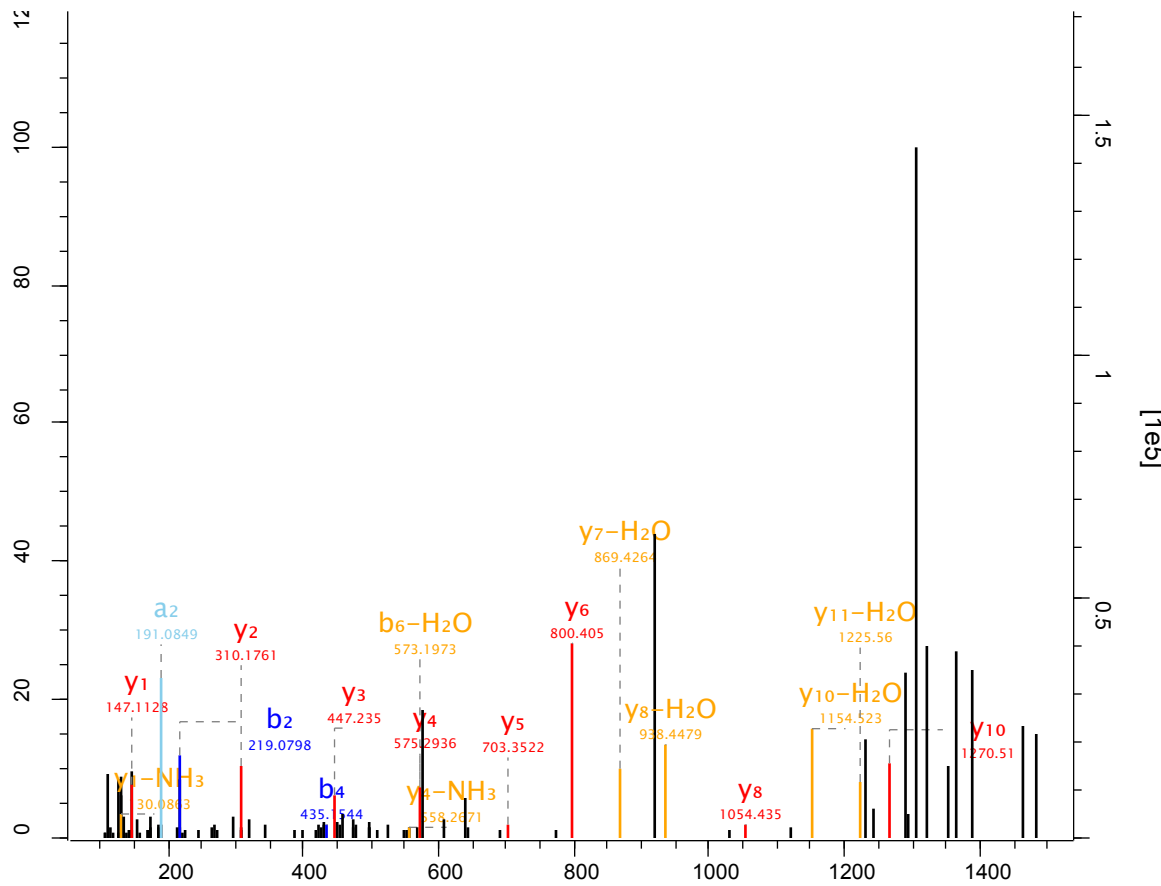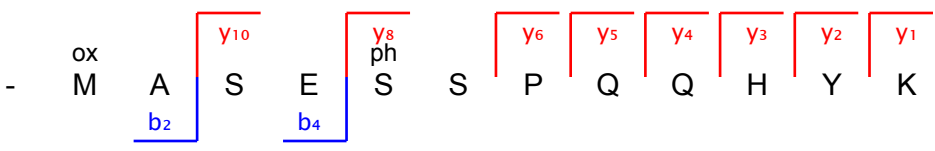

Raw file Scan Method Score m/z  
 201502\_COL14\_38\_45 14082 FTMS; HCD 43.03 548.21

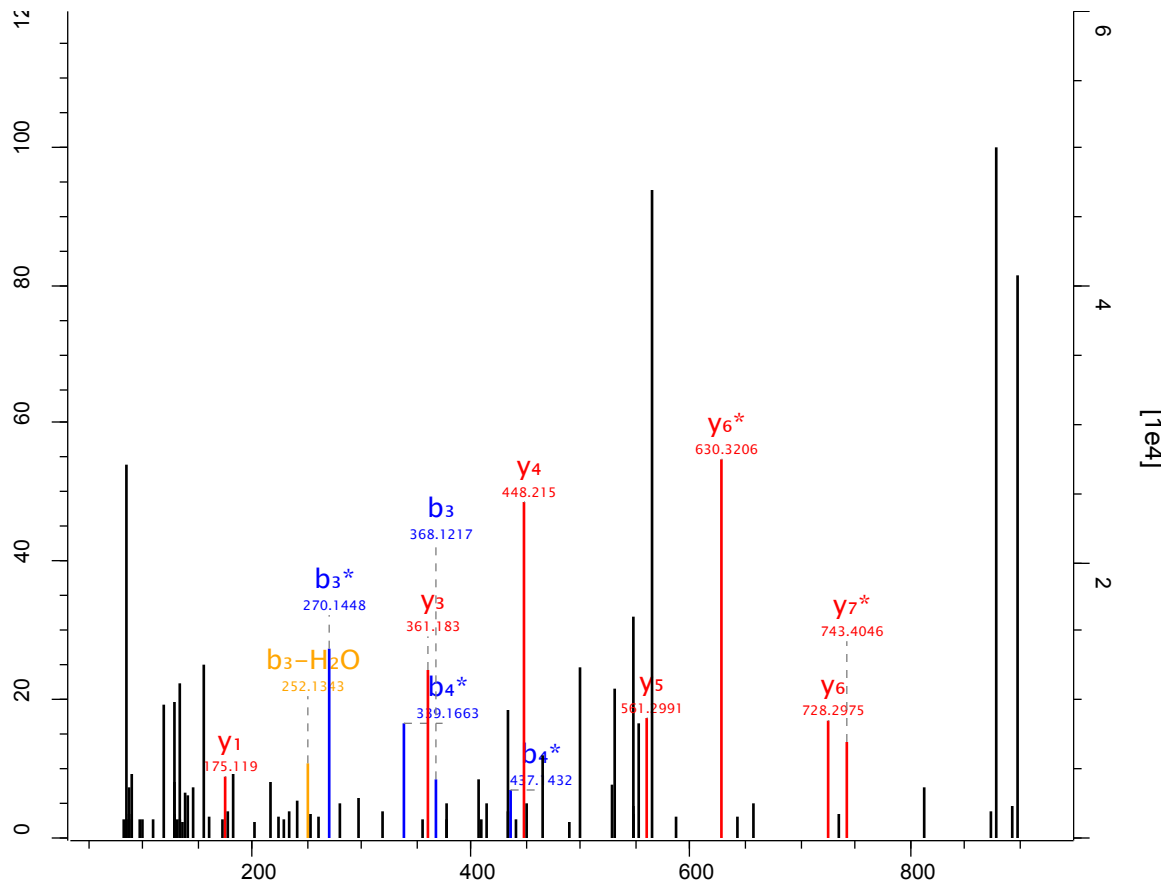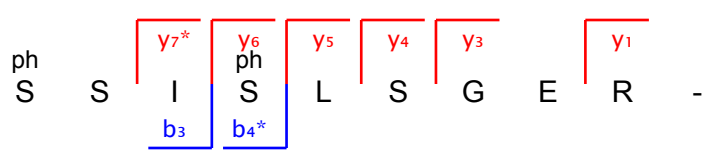

Raw file Scan Method Score m/z  
 201502\_COL14\_38\_45 1437 FTMS; HCD 56.77 473.53

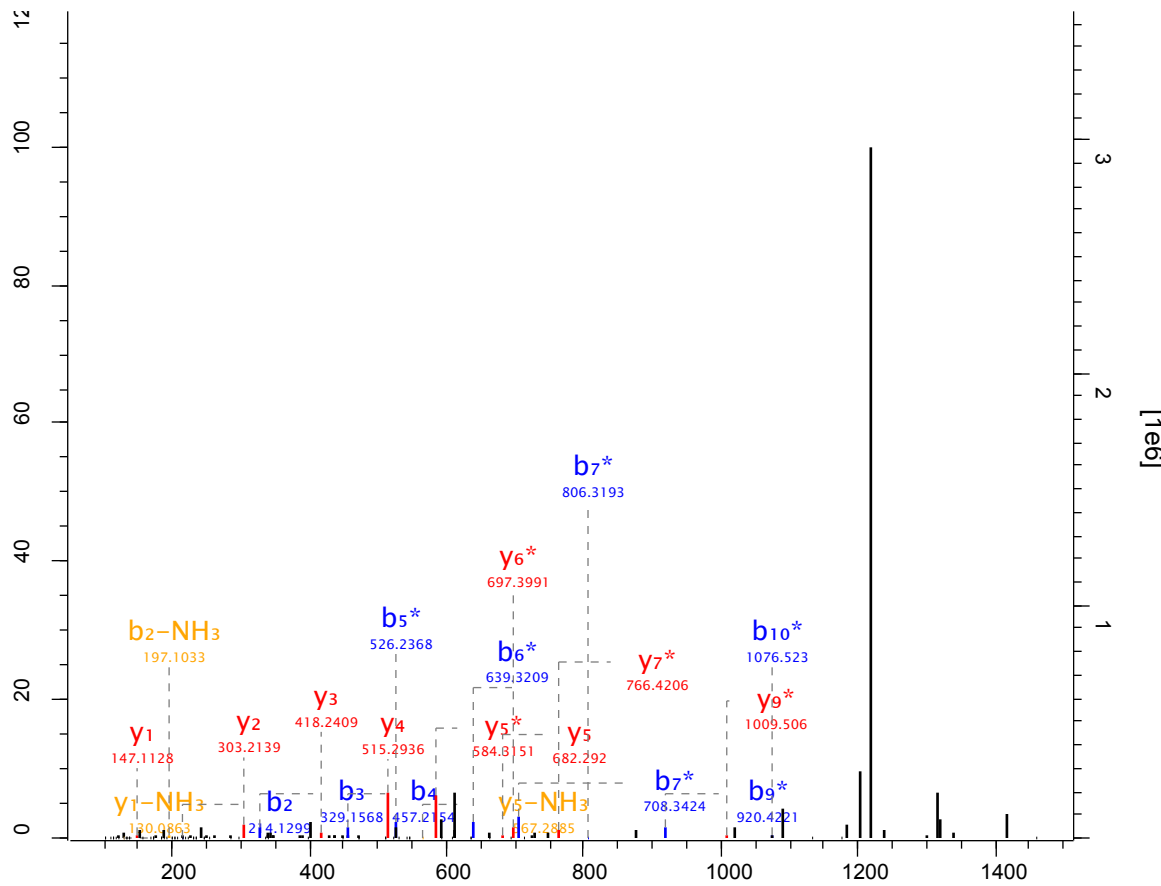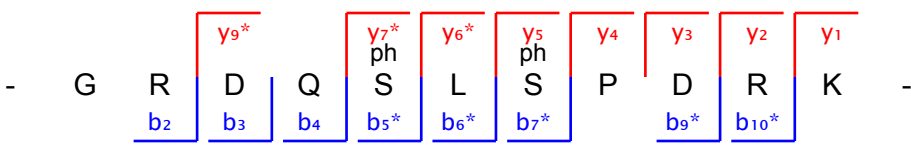

Raw file Scan Method Score m/z  
 201502\_COL14\_38\_45 14898 FTMS; HCD 77.75 675.79

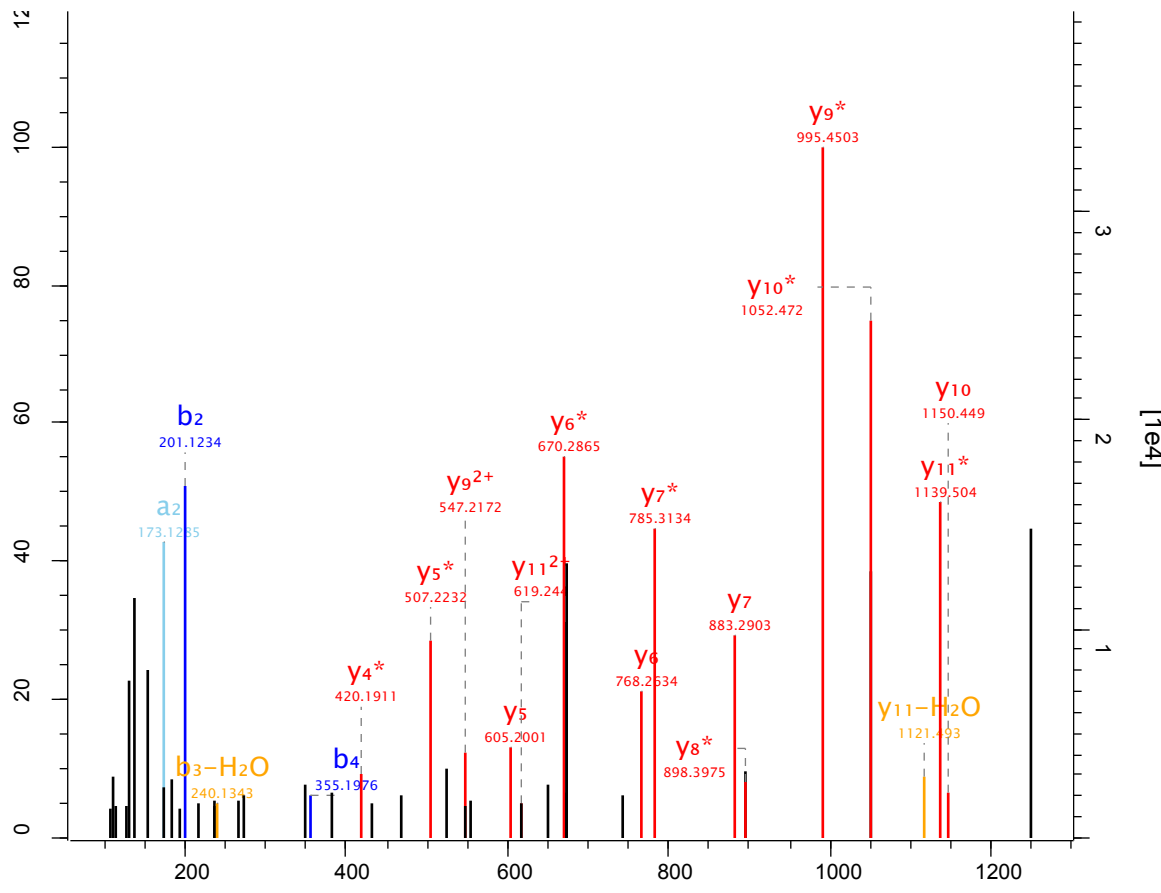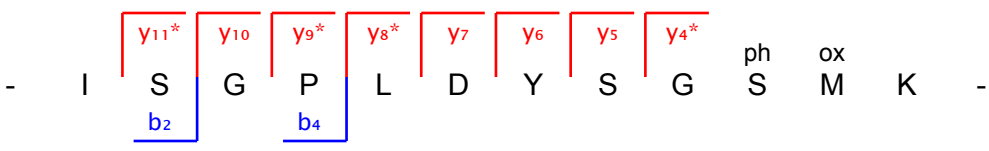



Raw file Scan Method Score m/z  
 201502\_COL14\_38\_45 1498 FTMS; HCD 94.57 522.53

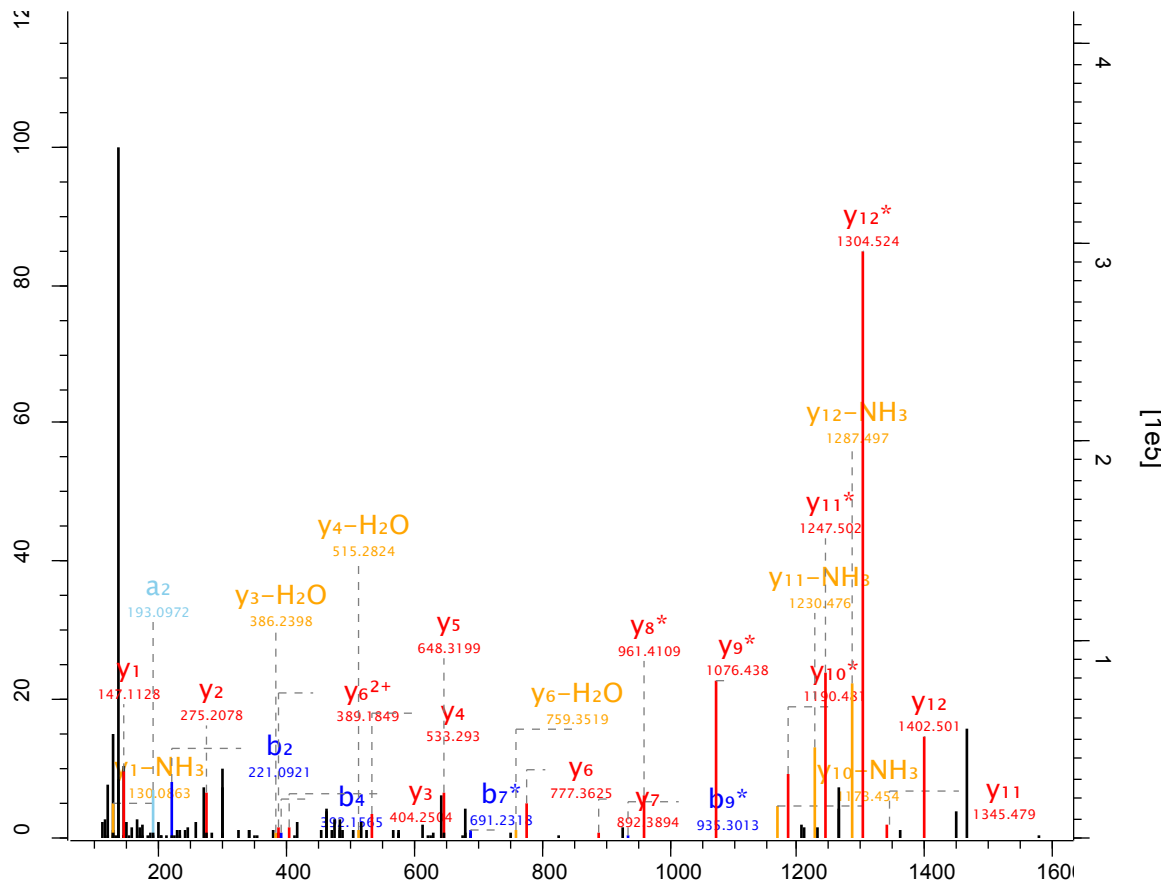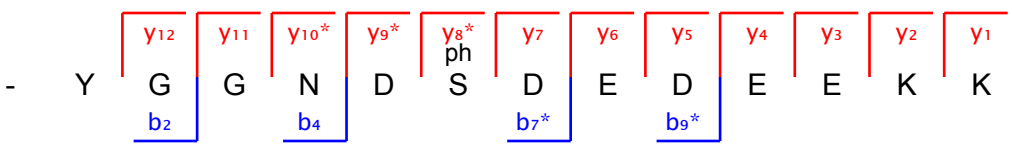

Raw file 201502\_COL14\_38\_45 Scan 15084 Method FTMS; HCD Score 82.89 m/z 913.36

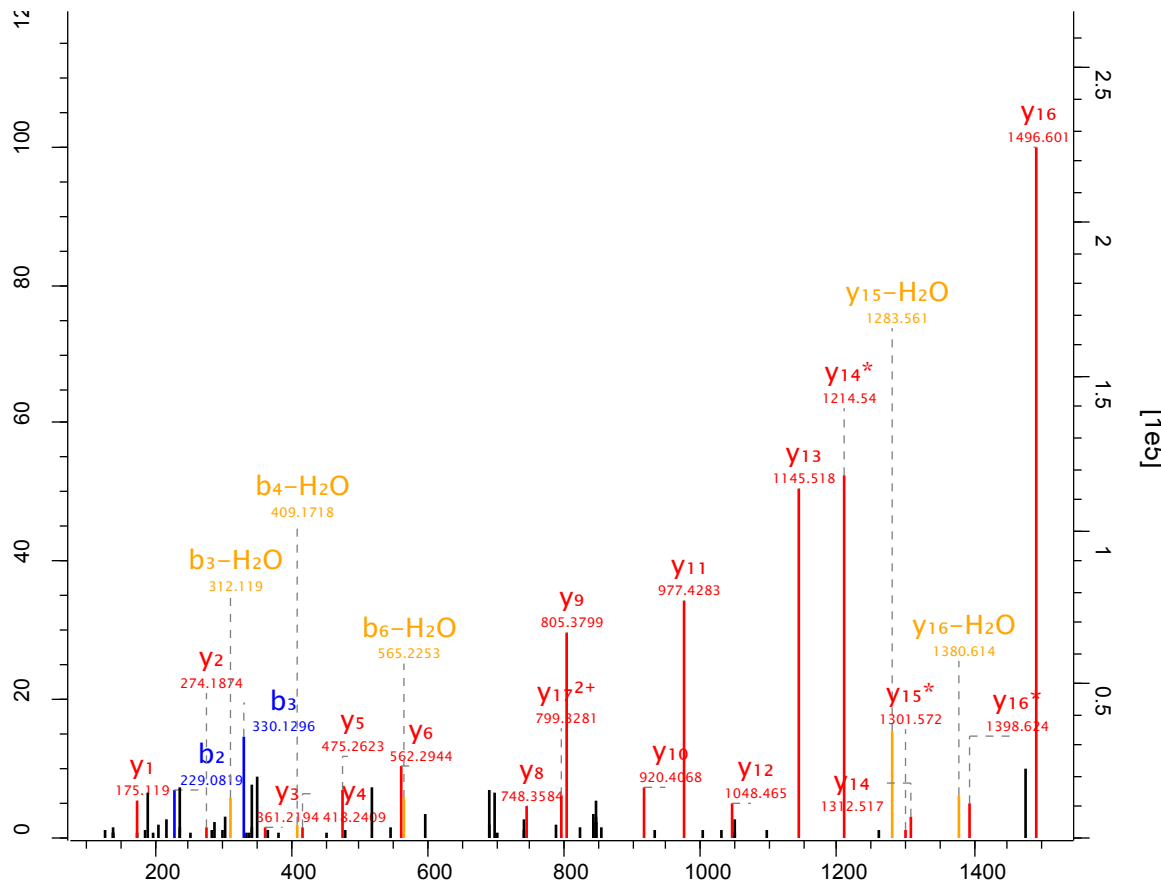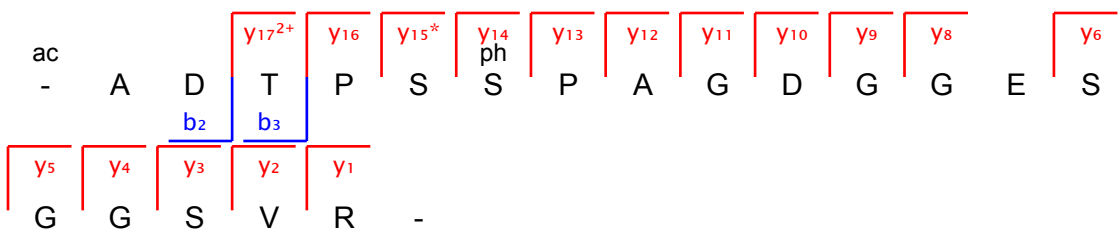

Raw file 201502\_COL14\_38\_45 Scan 16274 Method FTMS; HCD Score 74.44 m/z 972.93

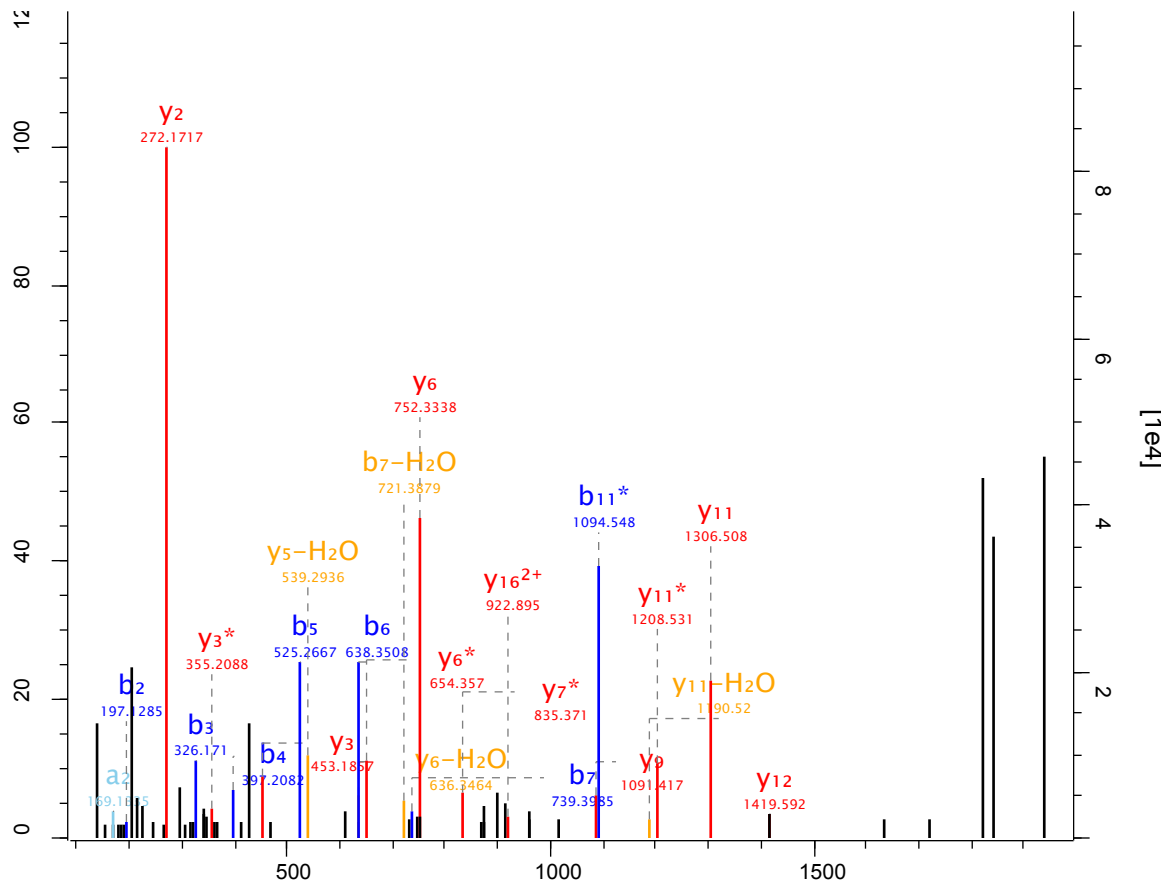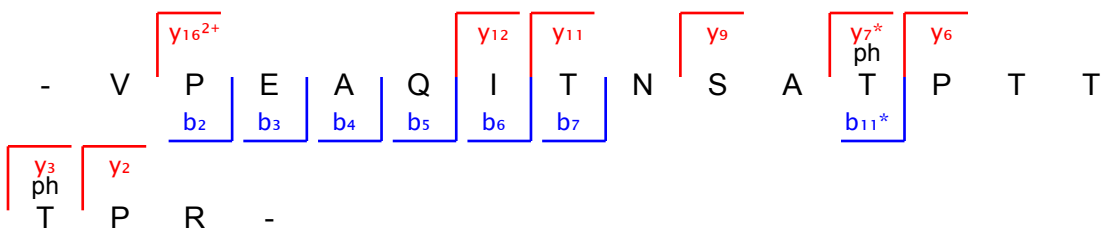

Raw file 201502\_COL14\_38\_45 Scan 1662 Method FTMS; HCD Score 81.65 m/z 564.22

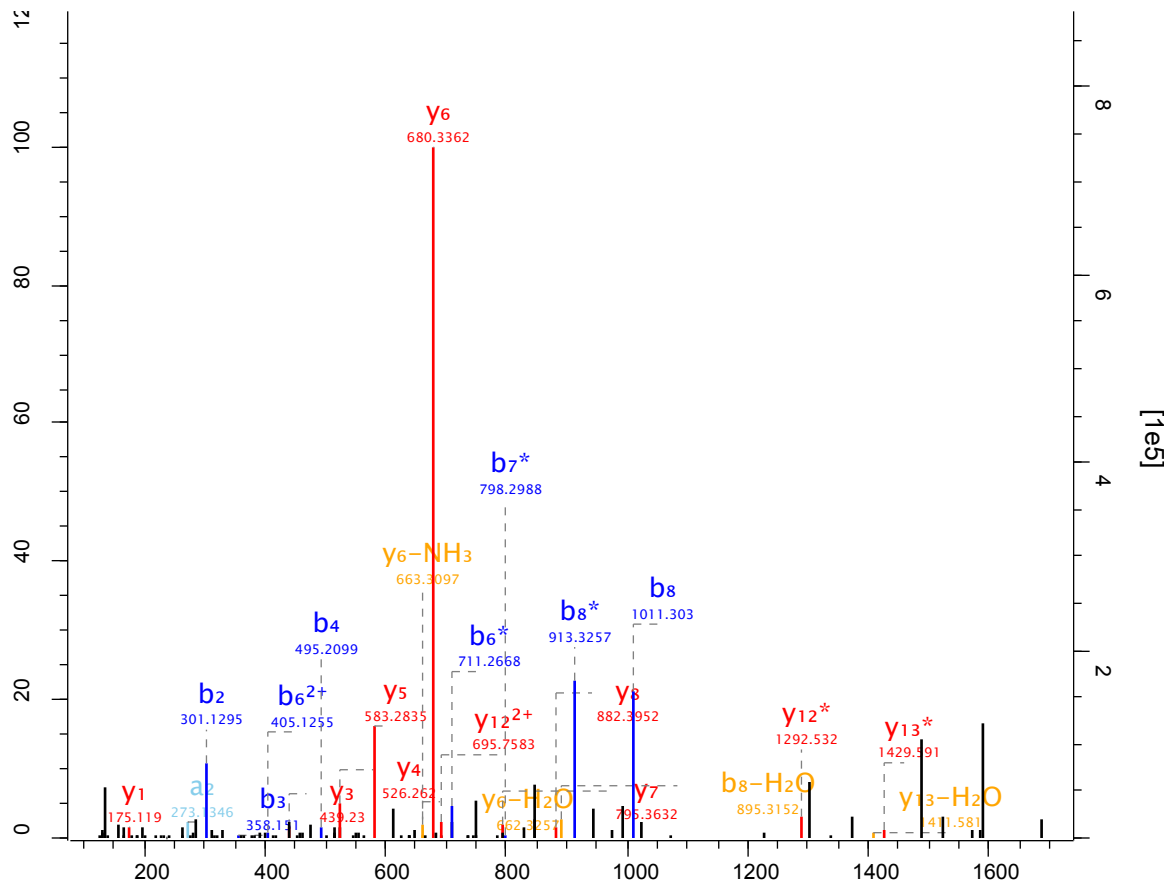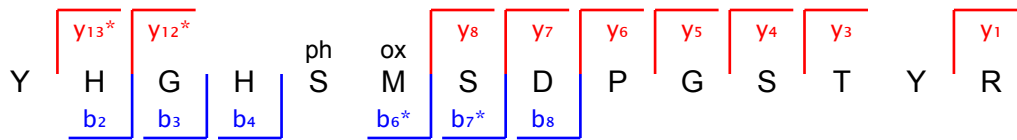

Raw file 201502\_COL14\_38\_45 Scan 17171 Method FTMS; HCD Score 64 m/z 909.89

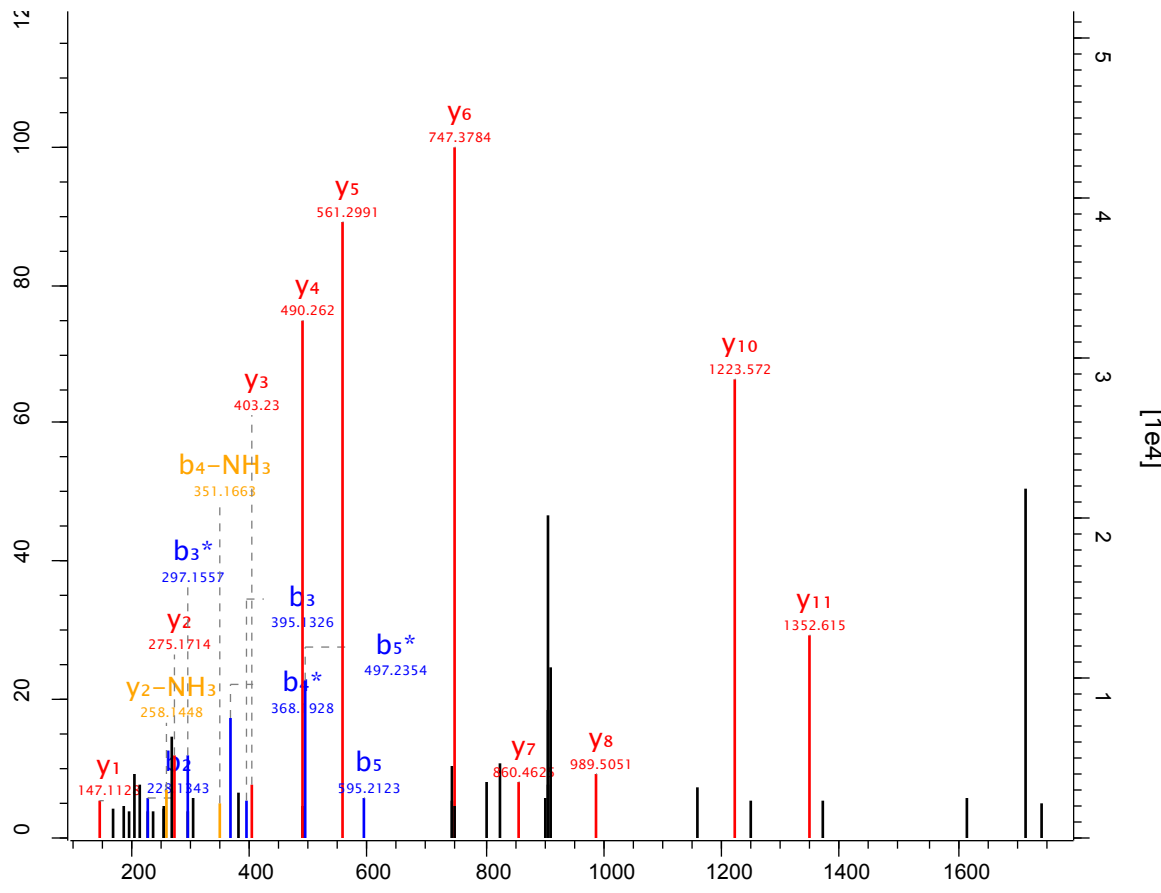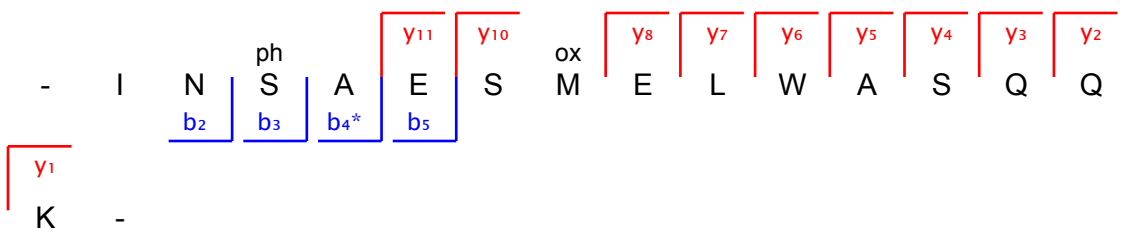

Raw file 201502\_COL14\_38\_45 Scan 1735 Method FTMS; HCD m/z 77.51 473.53

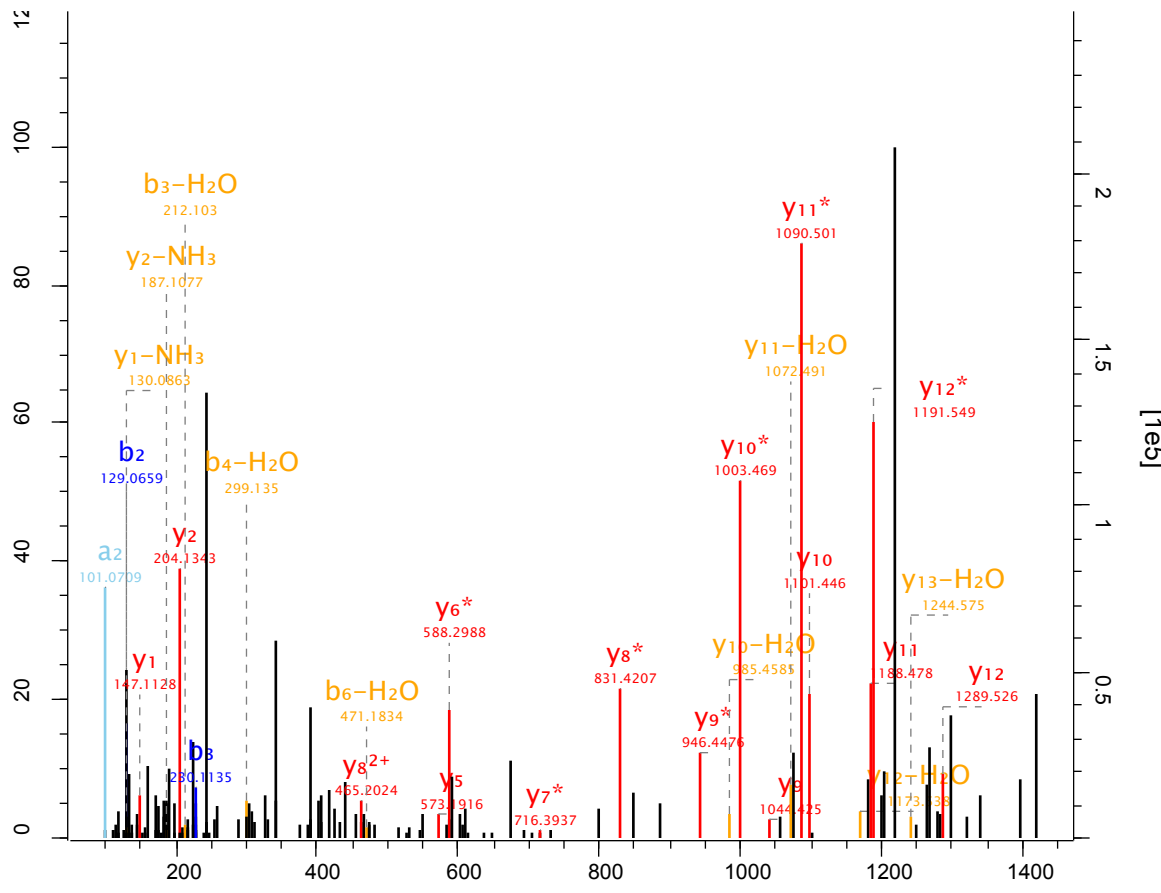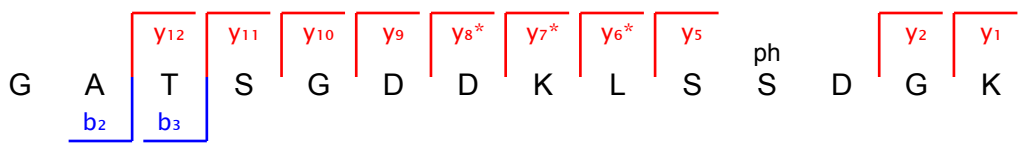

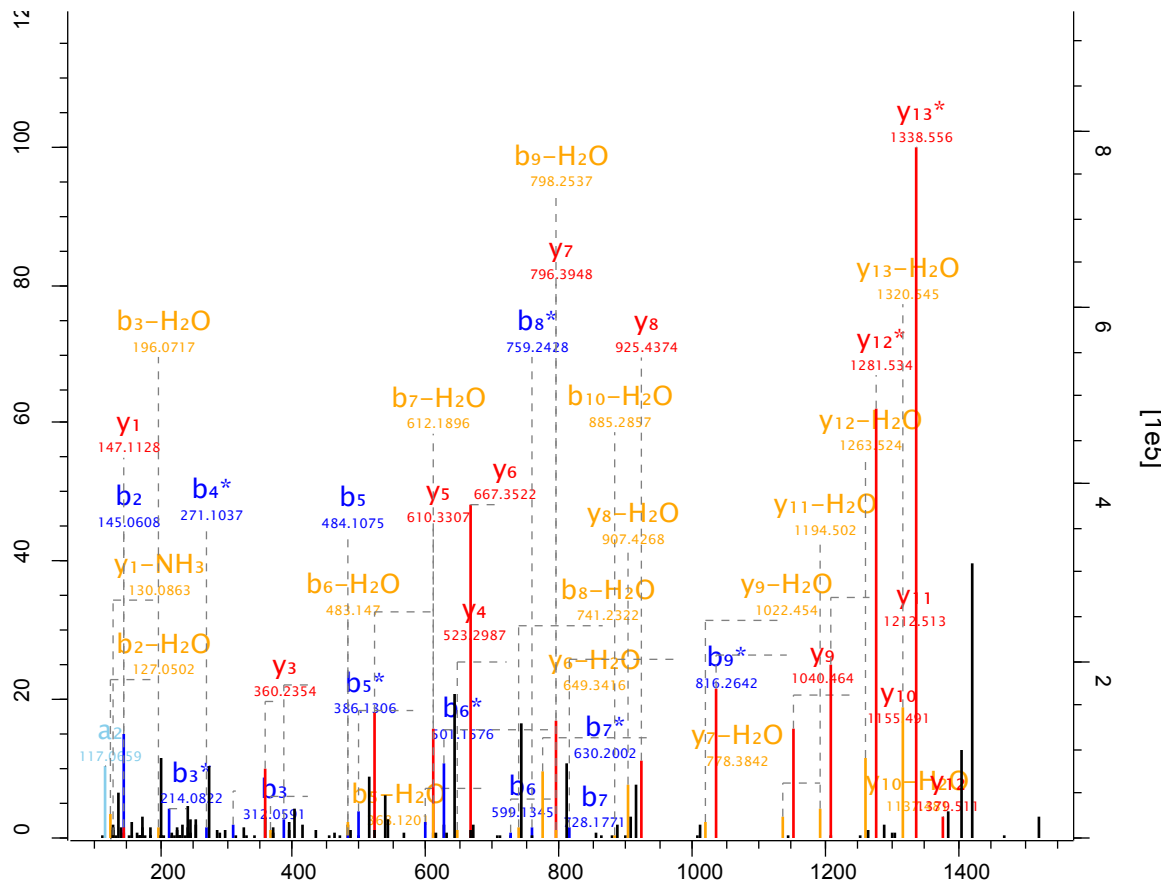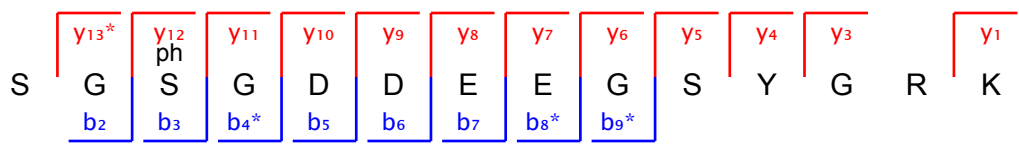

Raw file Scan Method Score m/z  
 201502\_COL14\_38\_45 18068 FTMS; HCD 117.21 1272.04

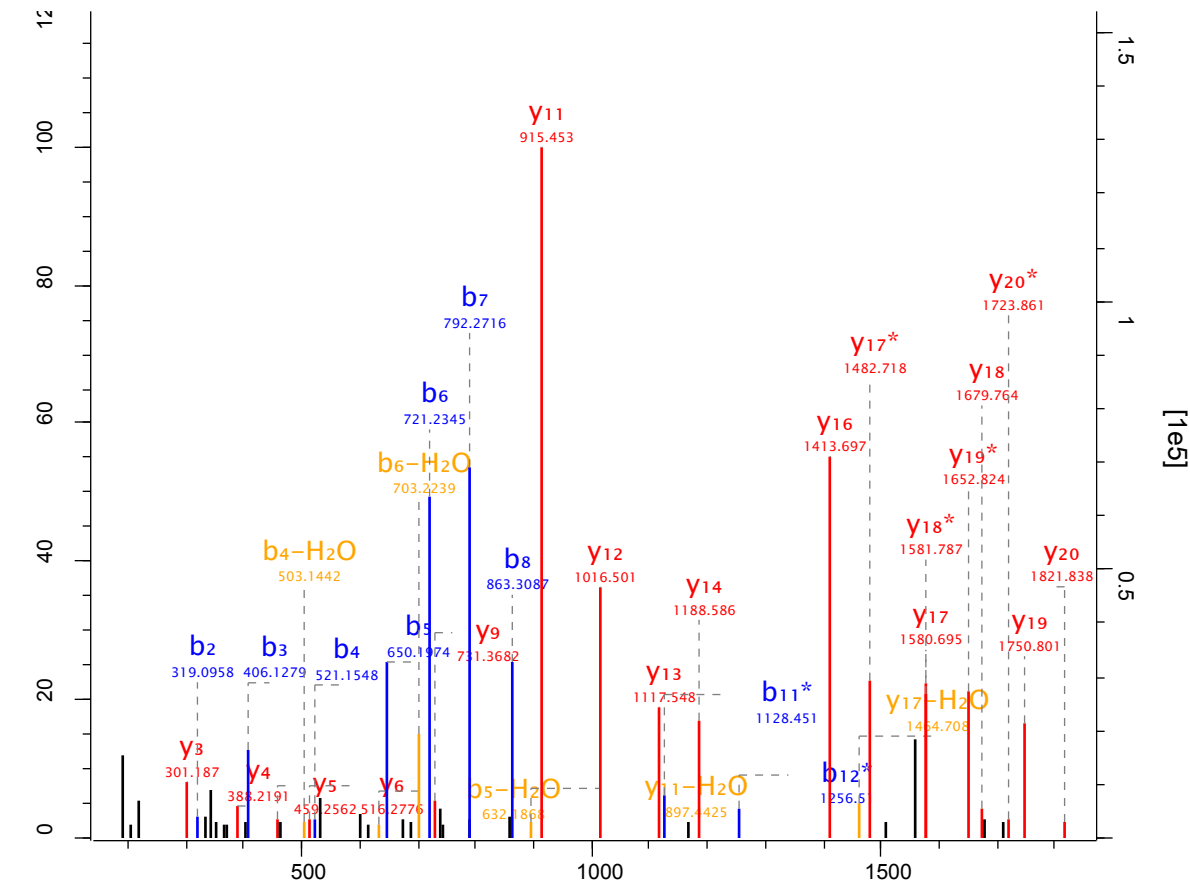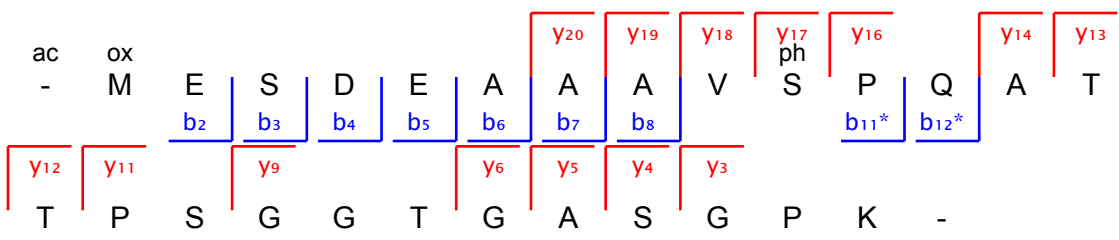



Raw file Scan Method Score m/z  
 201502\_COL14\_38\_45 18379 FTMS; HCD 68.54 523.73

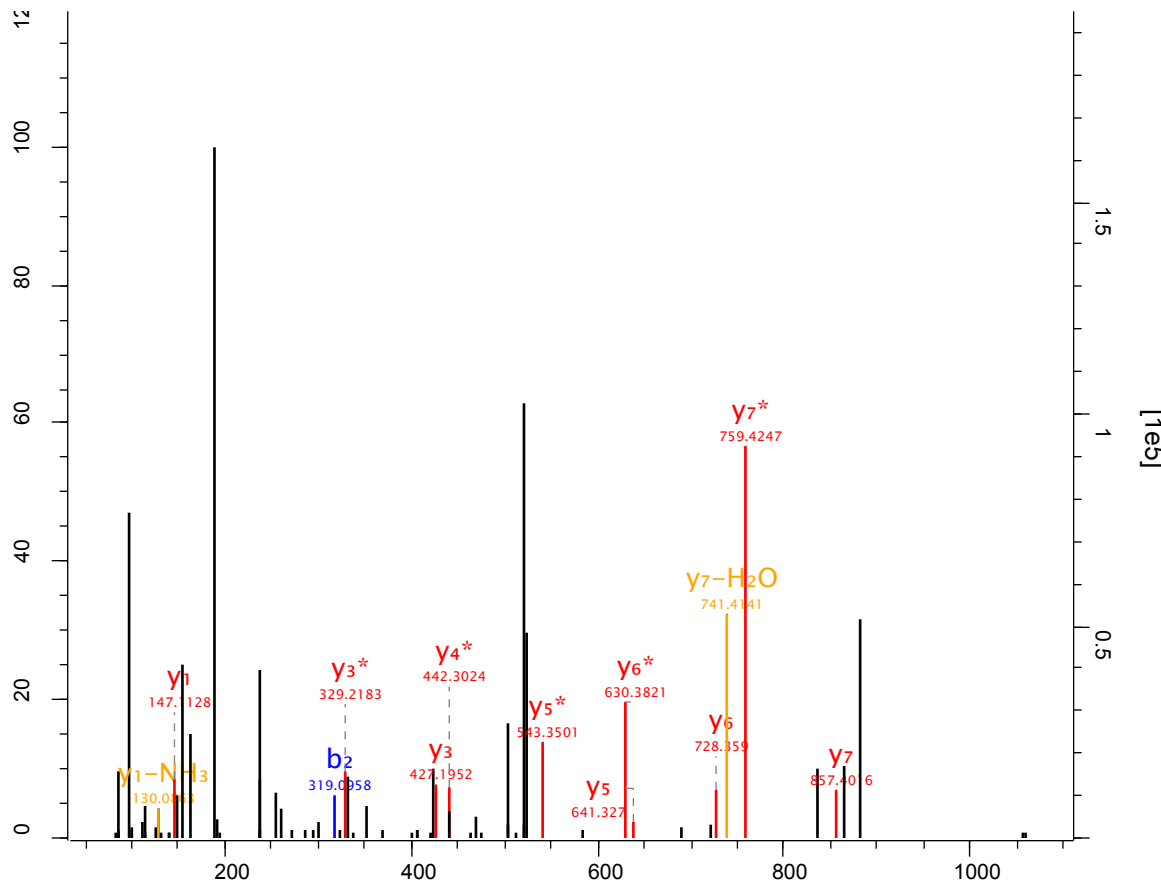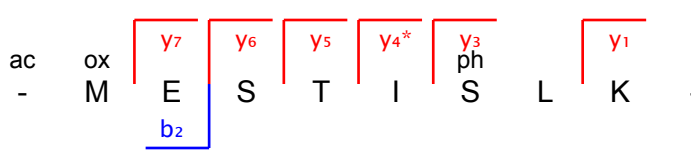

Raw file 201502\_COL14\_38\_45 Scan 19185 Method FTMS; HCD Score 80.96 m/z 595.76

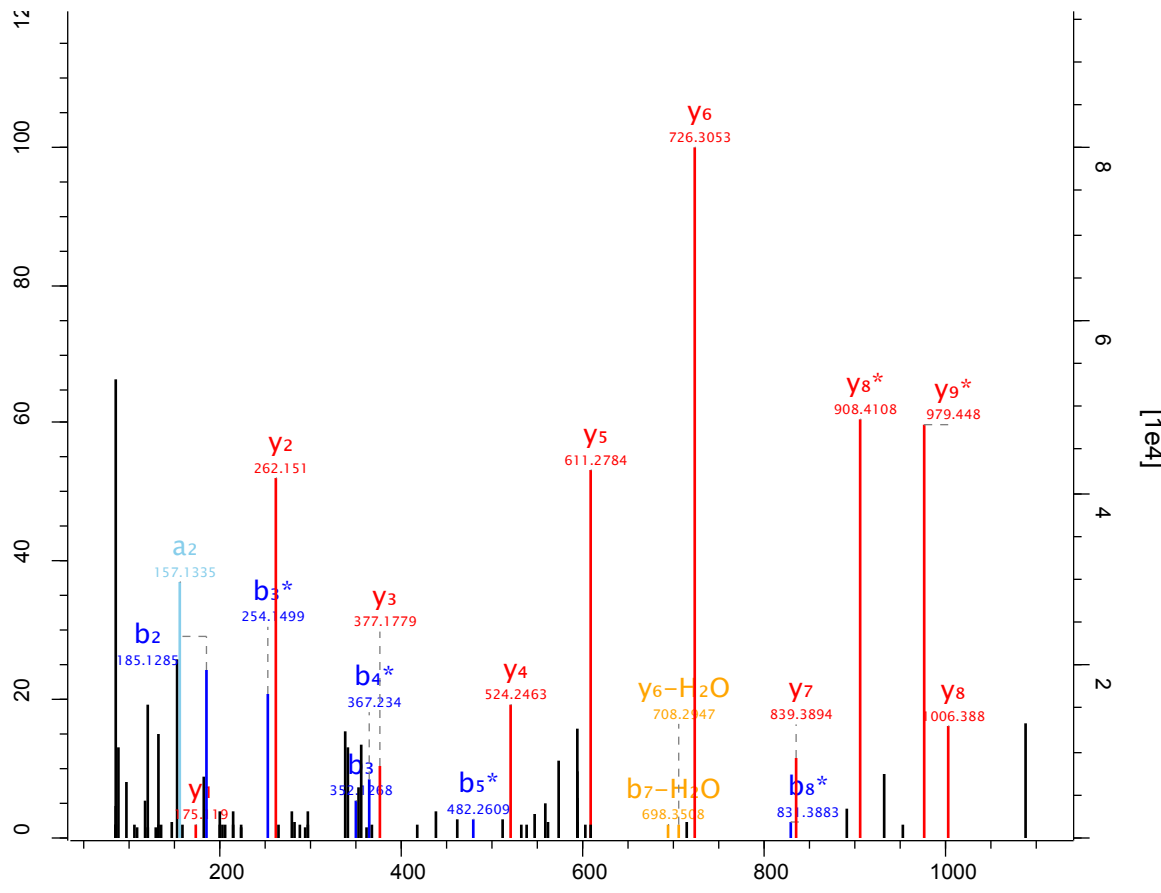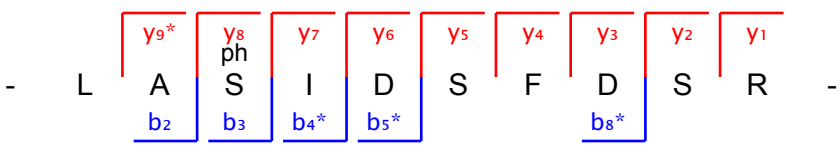

Raw file 201502\_COL14\_38\_45 Scan 1920 Method FTMS; HCD Score 89.56 m/z 575.9

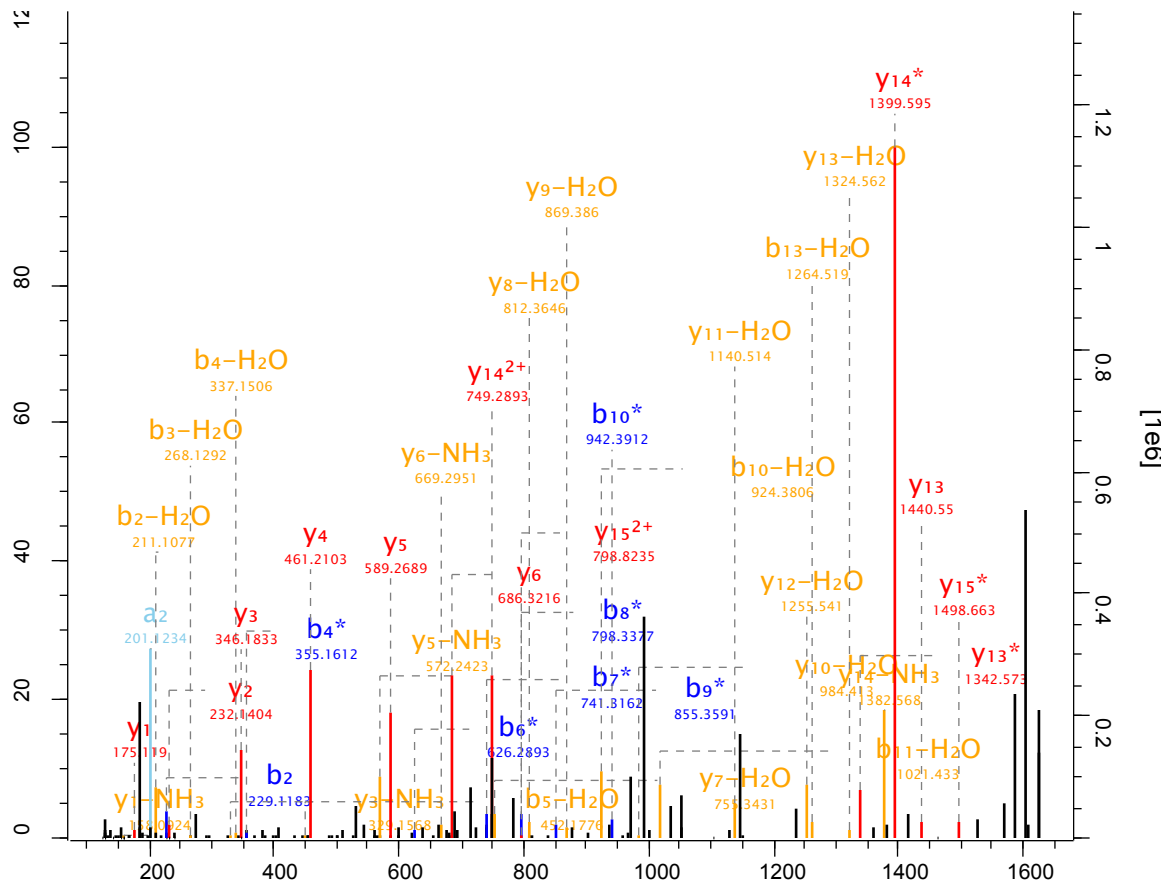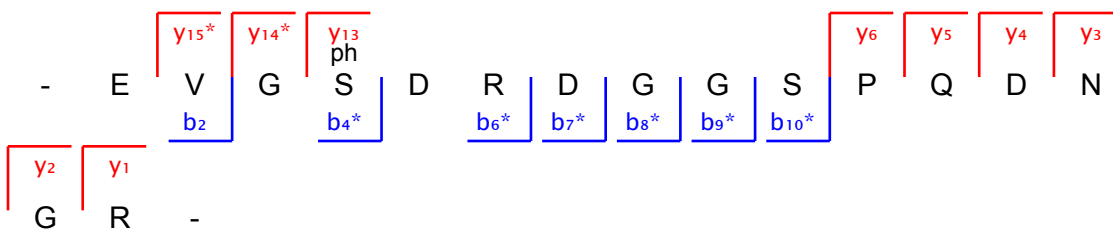

Raw file 201502\_COL14\_38\_45 Scan 2023 Method FTMS; HCD Score 88.11 m/z 649.25

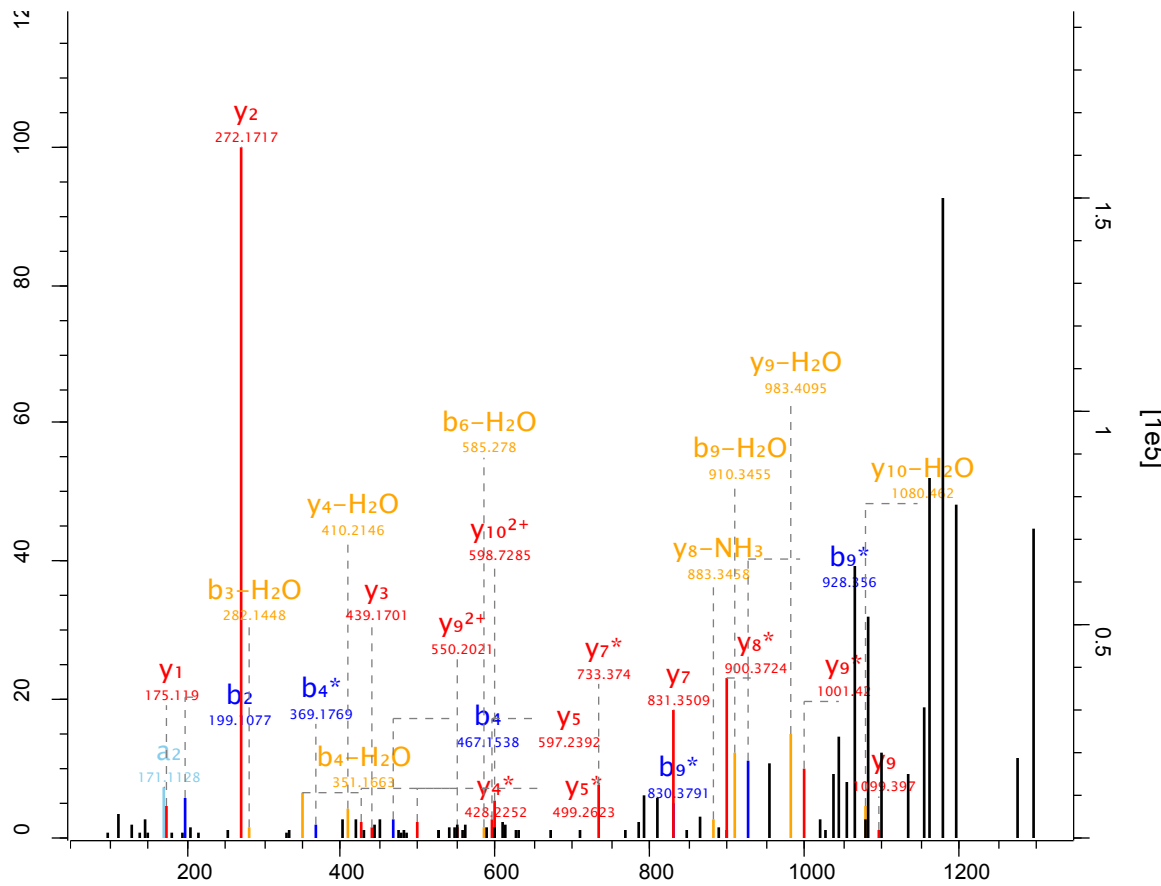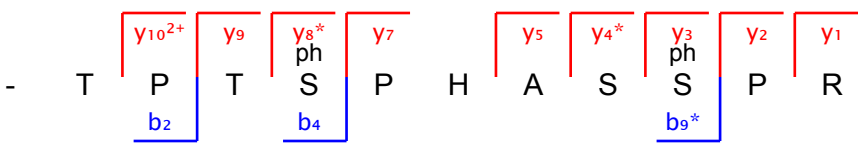

Raw file 201502\_COL14\_38\_45 Scan 2237 Method FTMS; HCD Score 180.86 m/z 649.24

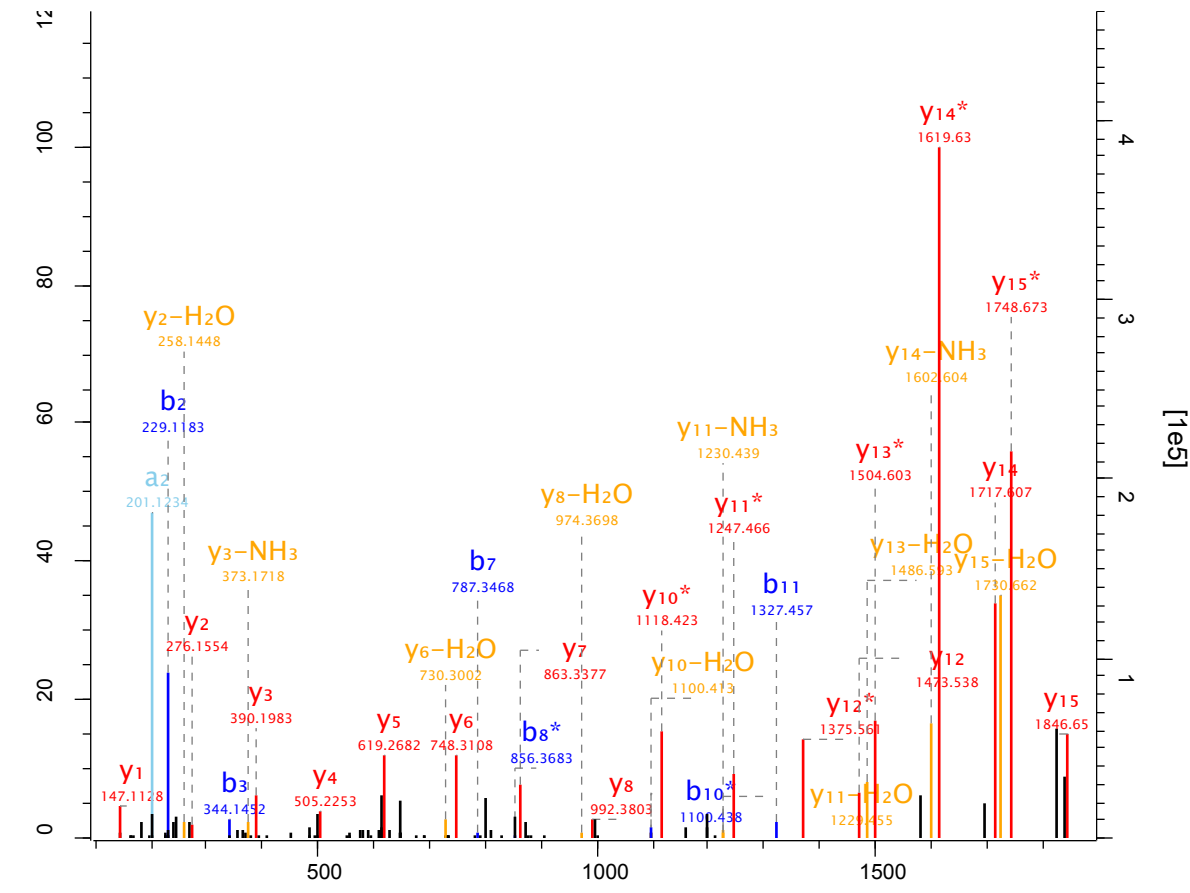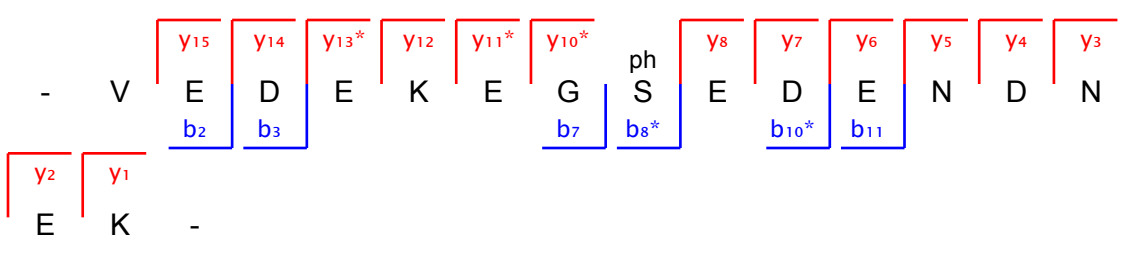



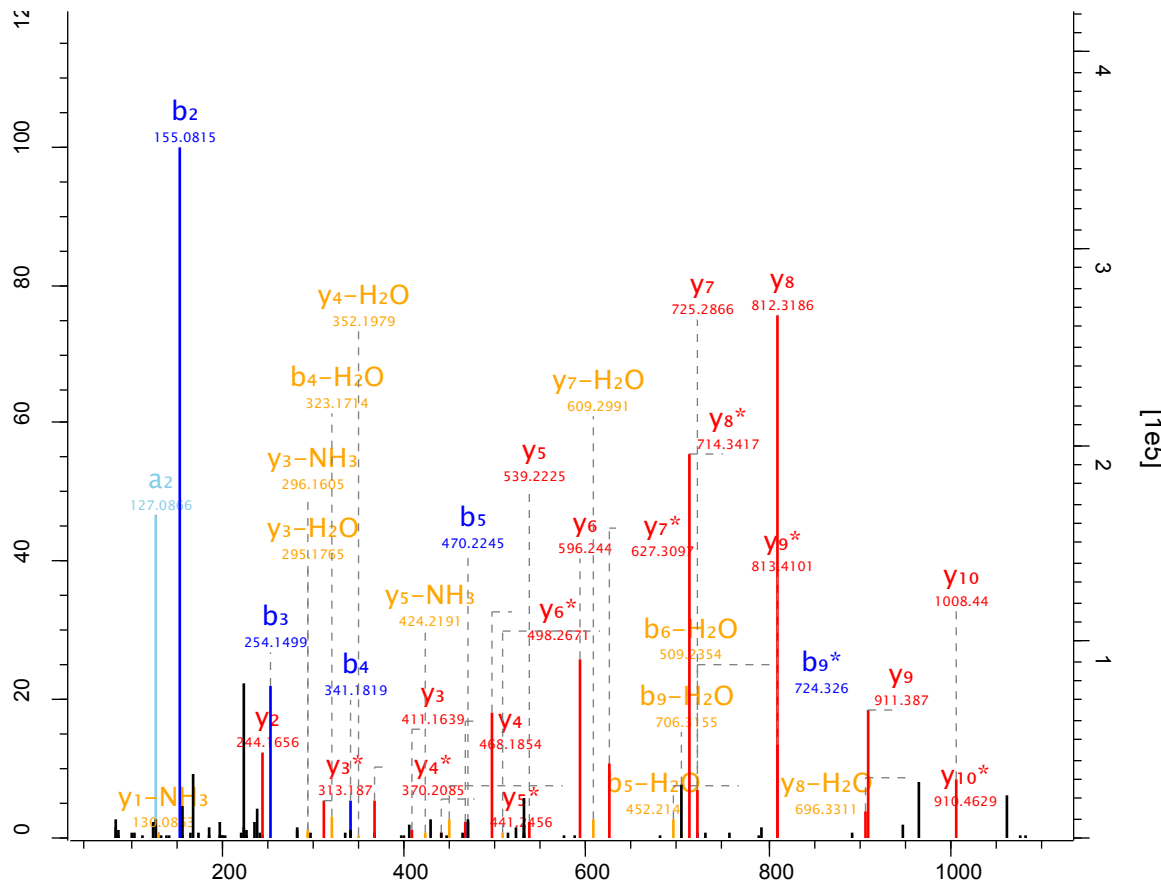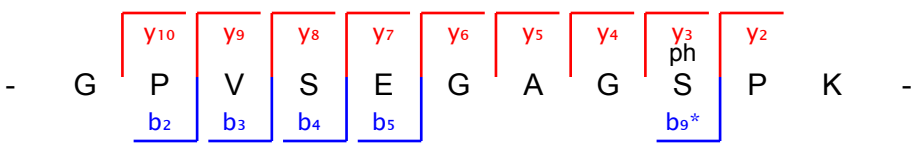

Raw file Scan Method Score m/z  
 201502\_COL14\_38\_45 23063 FTMS; HCD 100.28 887.86

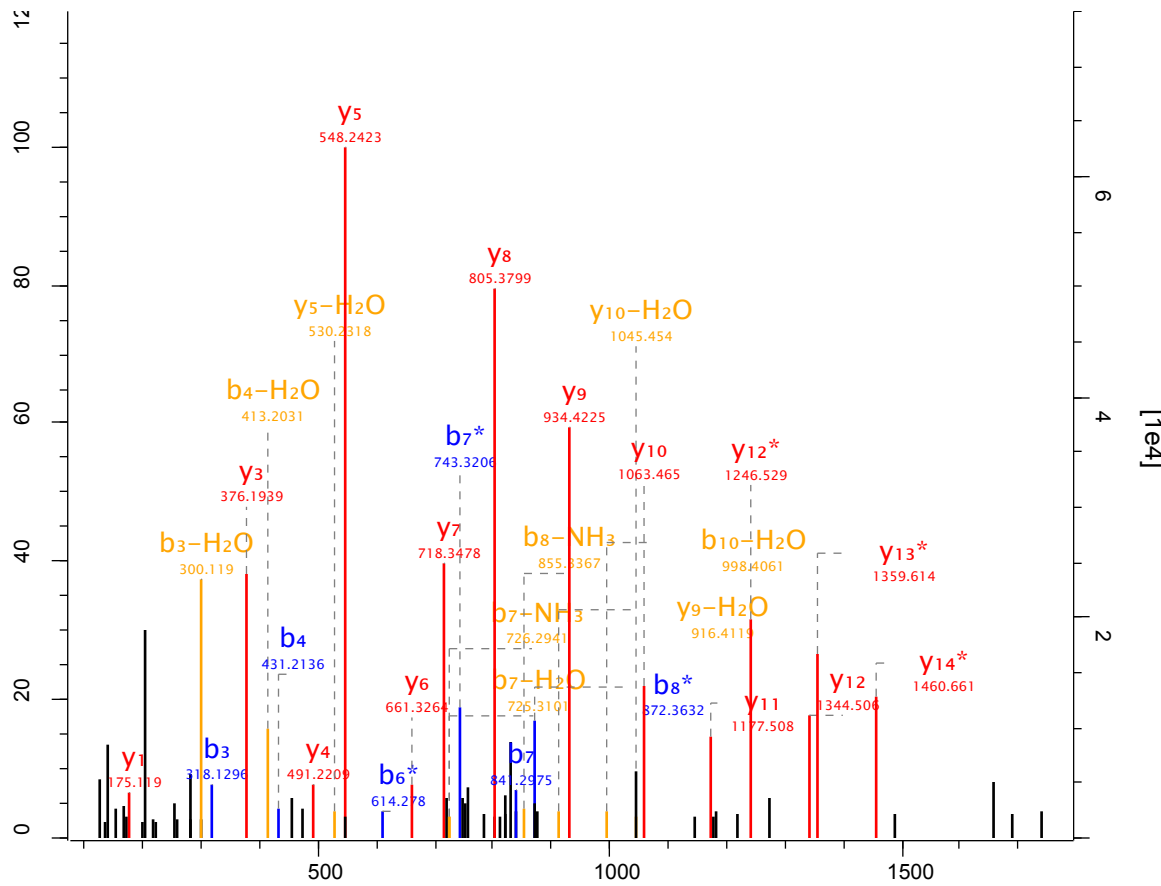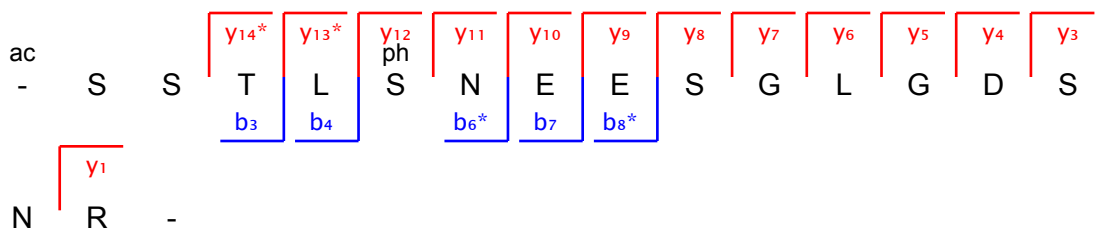



| Raw file           | Scan  | Method    | Score | m/z    |
|--------------------|-------|-----------|-------|--------|
| 201502_COL14_38_45 | 23845 | FTMS; HCD | 67.23 | 952.41 |

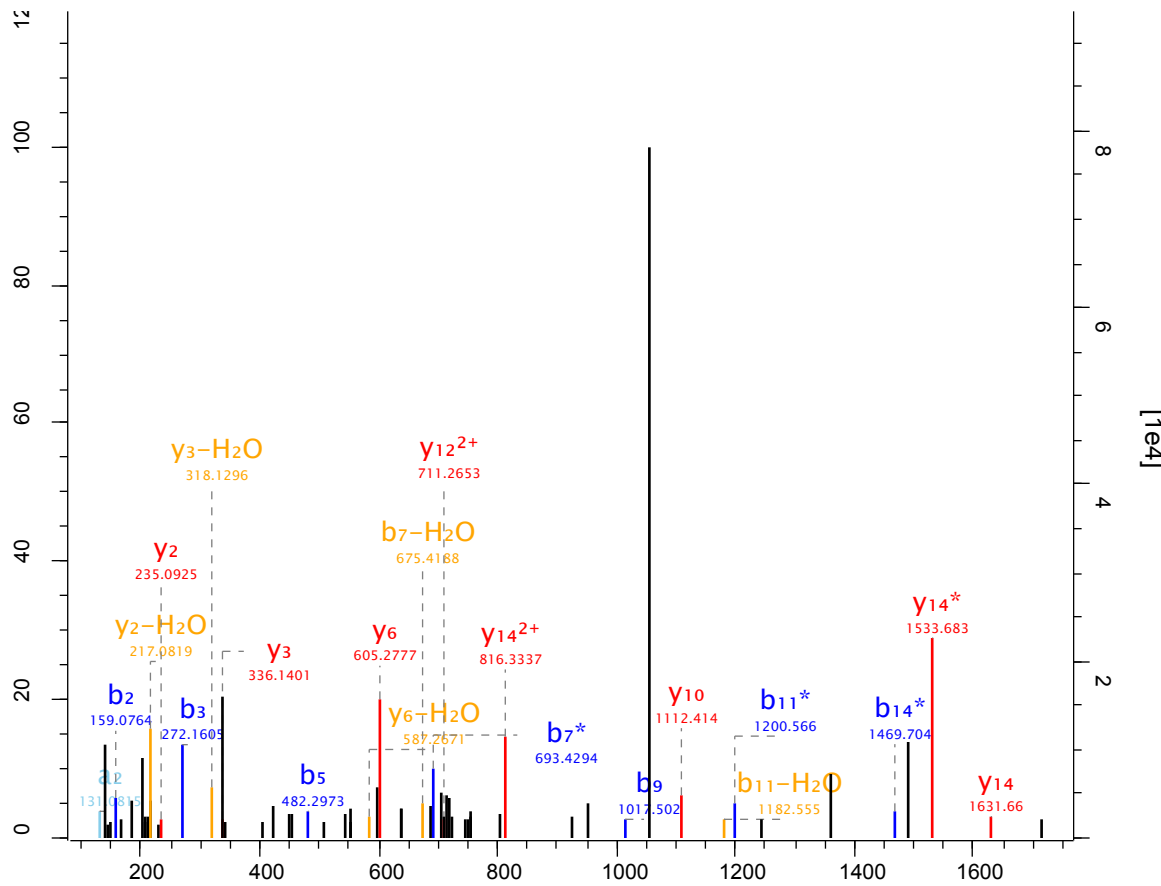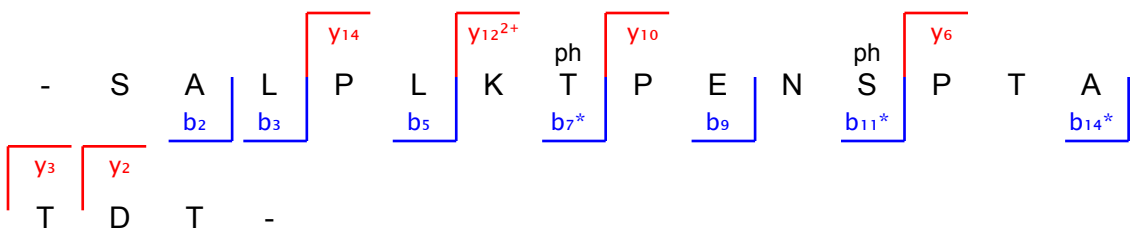

Raw file Scan Method Score m/z  
 201502\_COL14\_38\_45 24598 FTMS; HCD 86.08 805.98

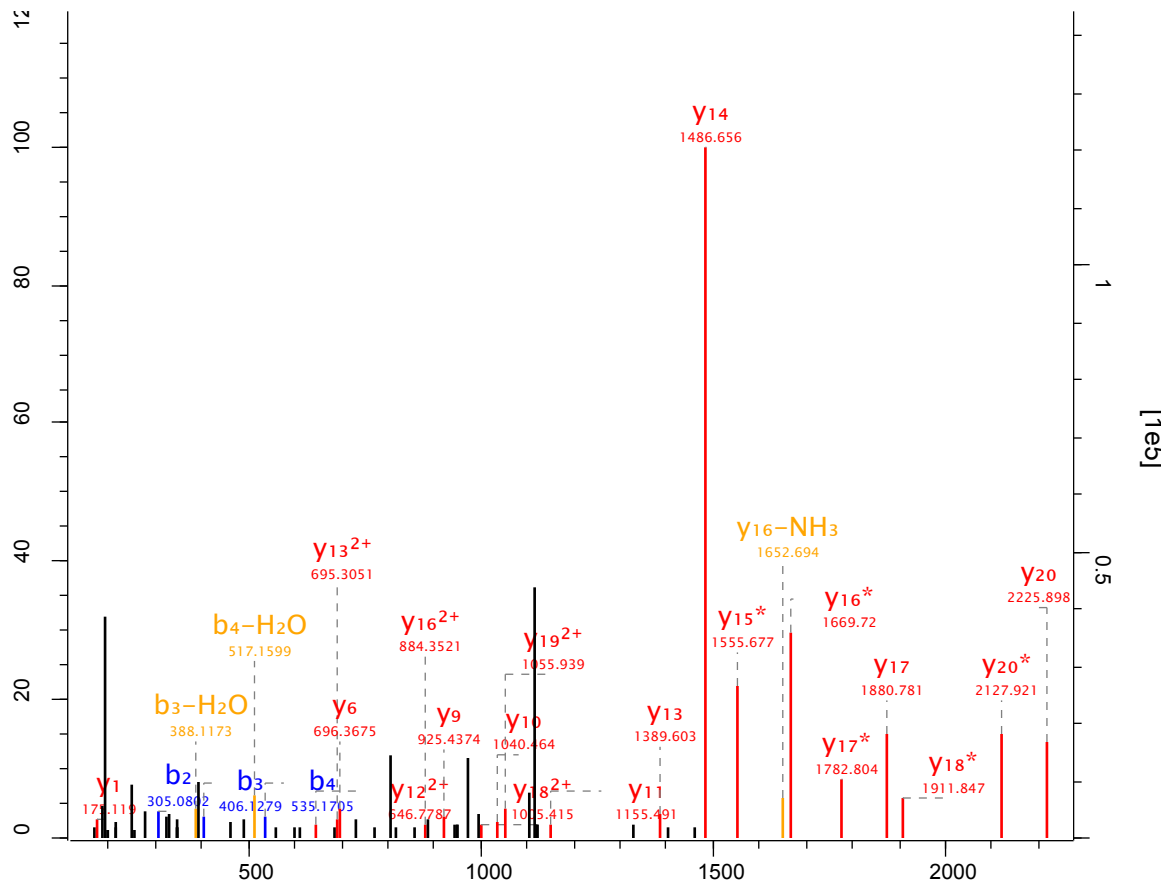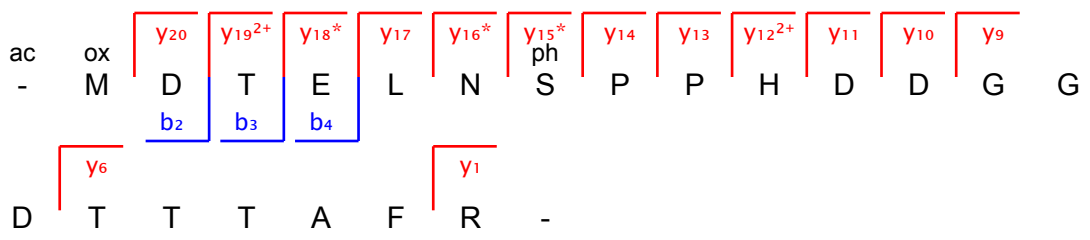

| Raw file           | Scan | Method    | Score | m/z    |
|--------------------|------|-----------|-------|--------|
| 201502_COL14_38_45 | 2540 | FTMS; HCD | 47.99 | 511.73 |

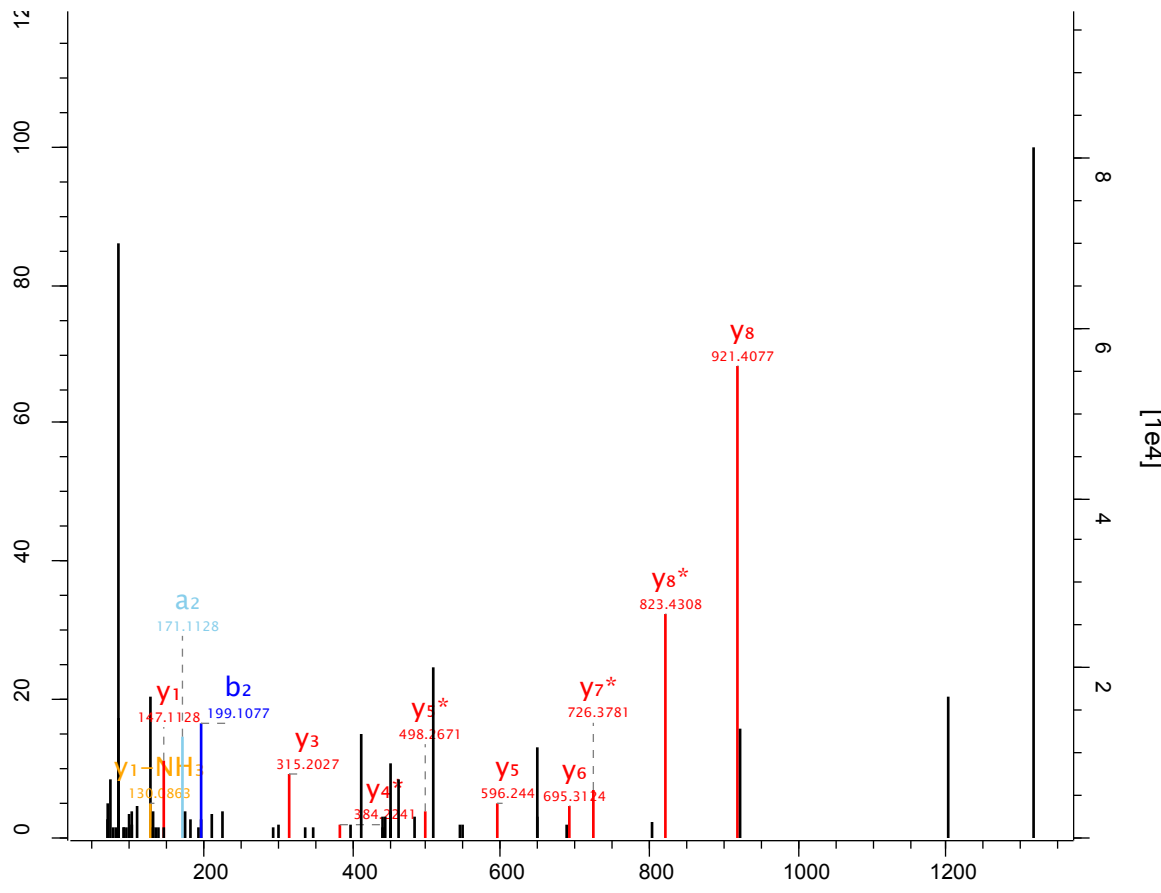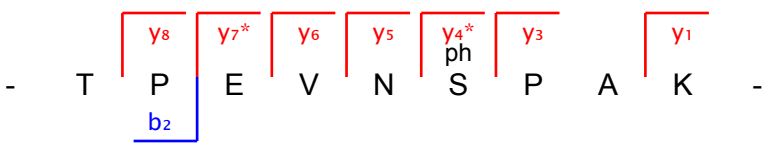

| Raw file           | Scan | Method    | Score | m/z    |
|--------------------|------|-----------|-------|--------|
| 201502_COL14_38_45 | 2633 | FTMS; HCD | 42.72 | 405.19 |

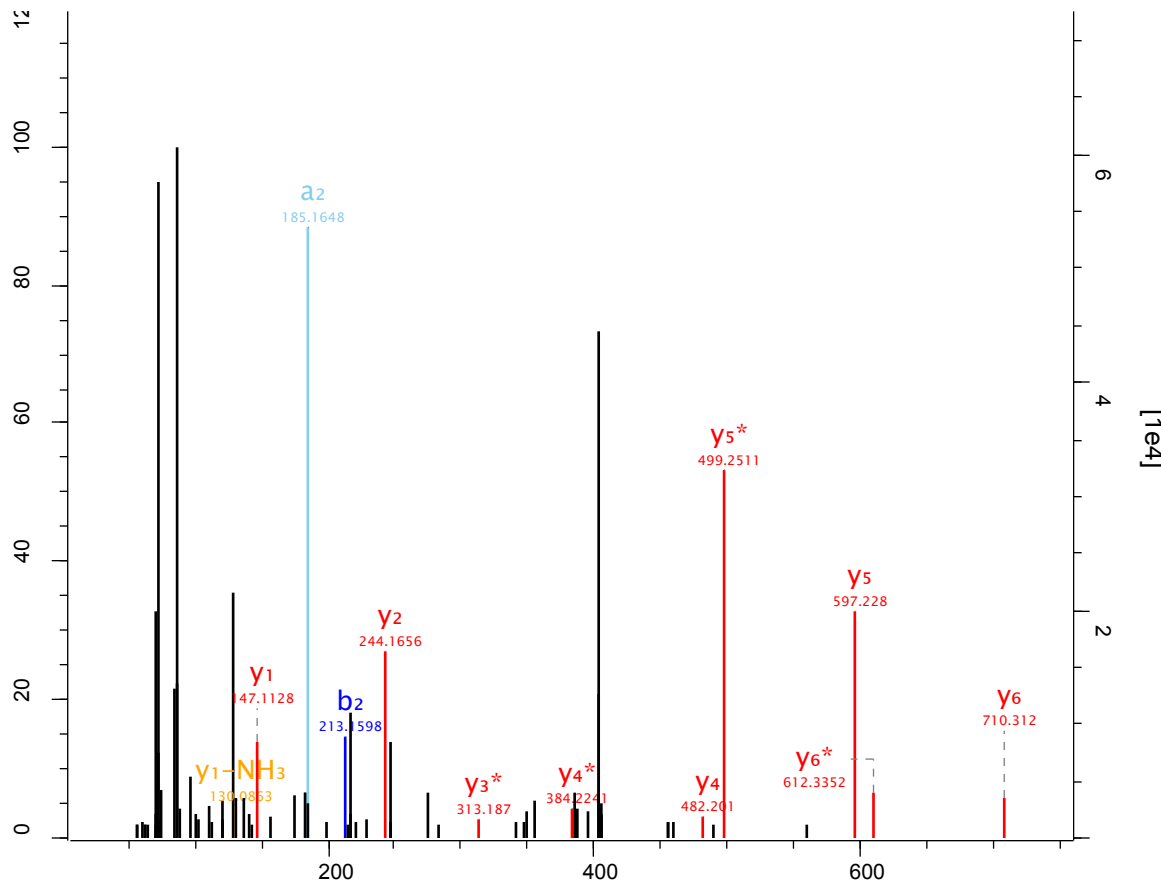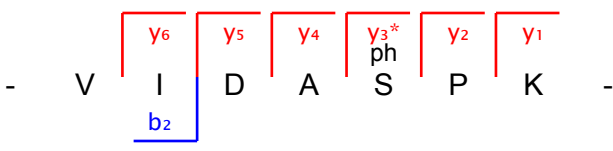

Raw file Scan Method Score m/z  
 201502\_COL14\_38\_45 26376 FTMS; HCD 42.79 878.03

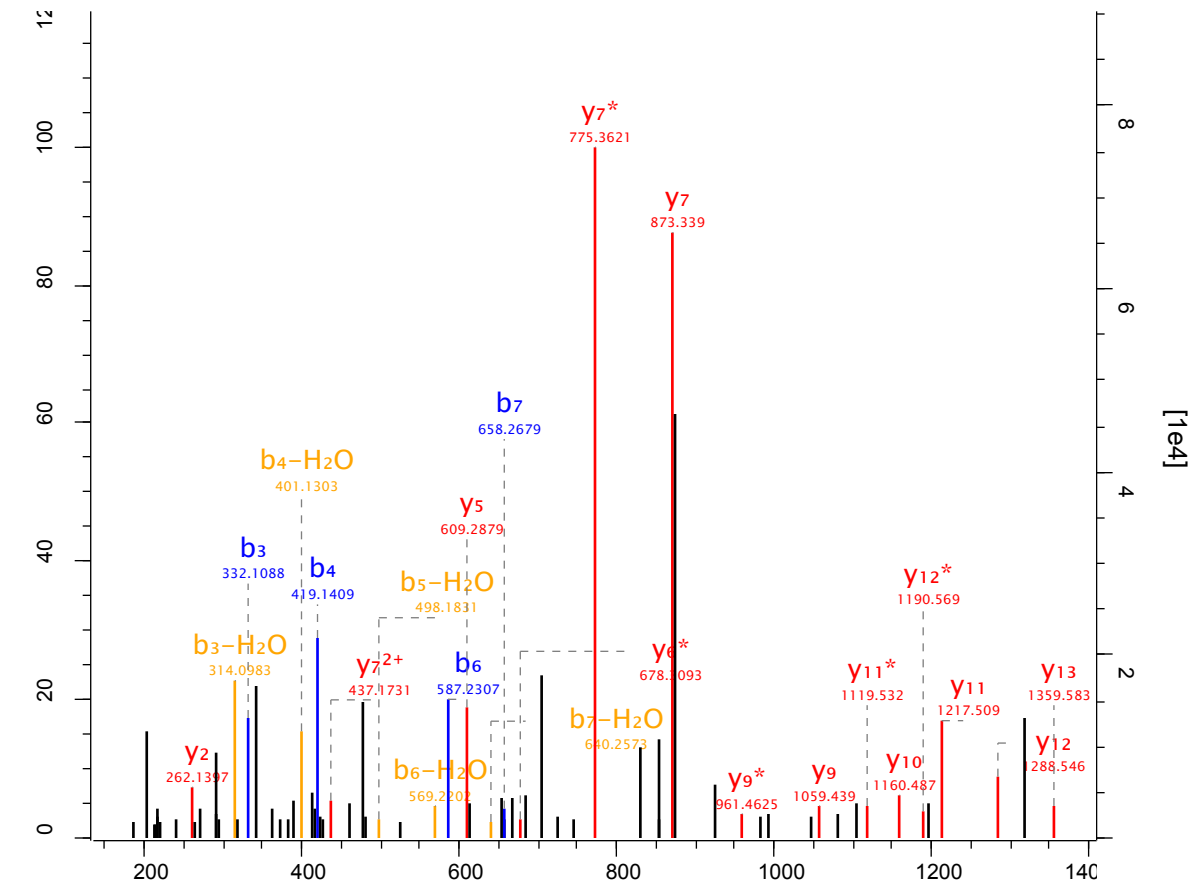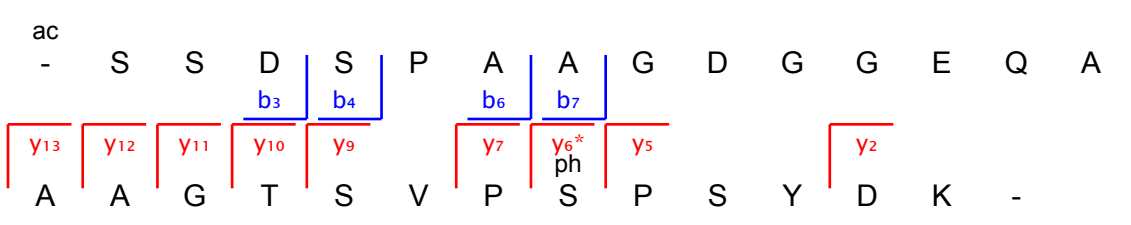

| Raw file           | Scan | Method    | Score | m/z    |
|--------------------|------|-----------|-------|--------|
| 201502_COL14_38_45 | 2674 | FTMS; HCD | 41.4  | 468.72 |

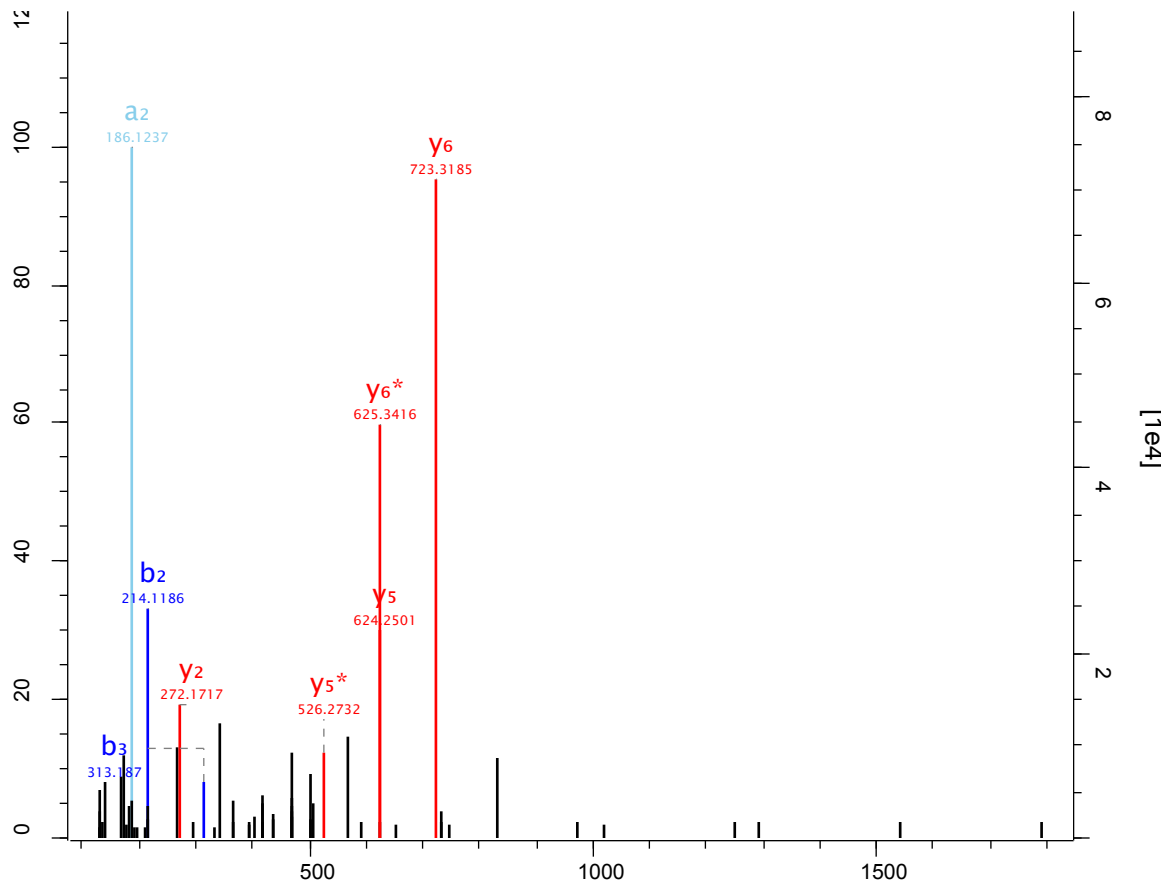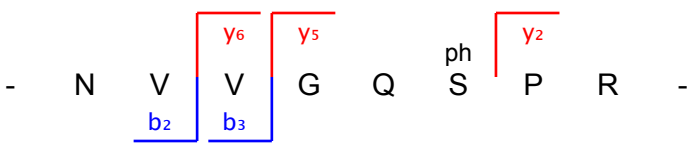

Raw file Scan Method Score m/z  
 201502\_COL14\_38\_45 26762 FTMS; HCD 42.31 610.76

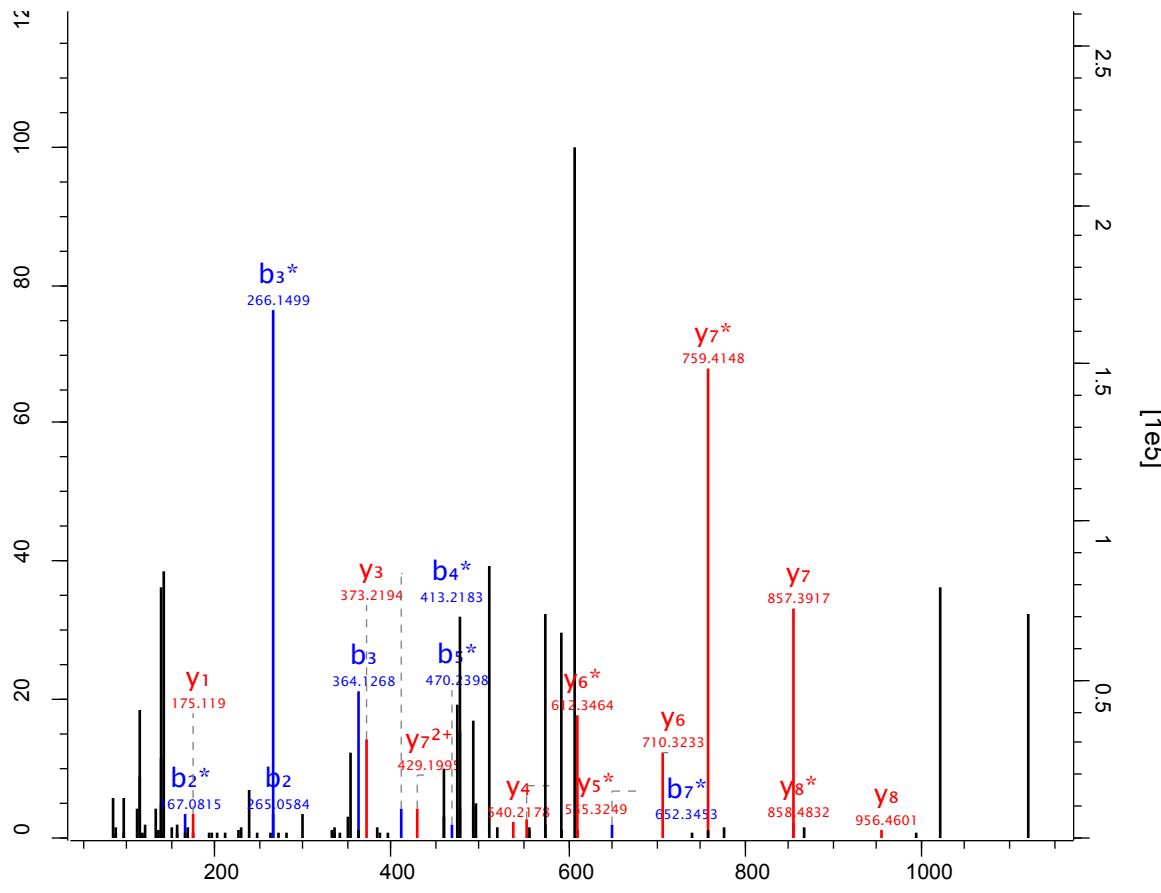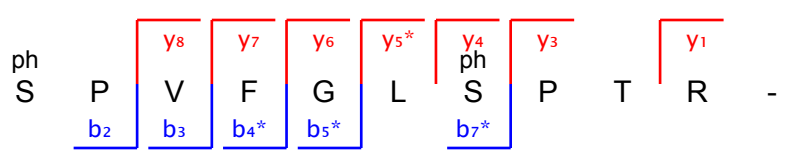

Raw file Scan Method Score m/z  
 201502\_COL14\_38\_45 2687 FTMS; HCD 60.55 598.27

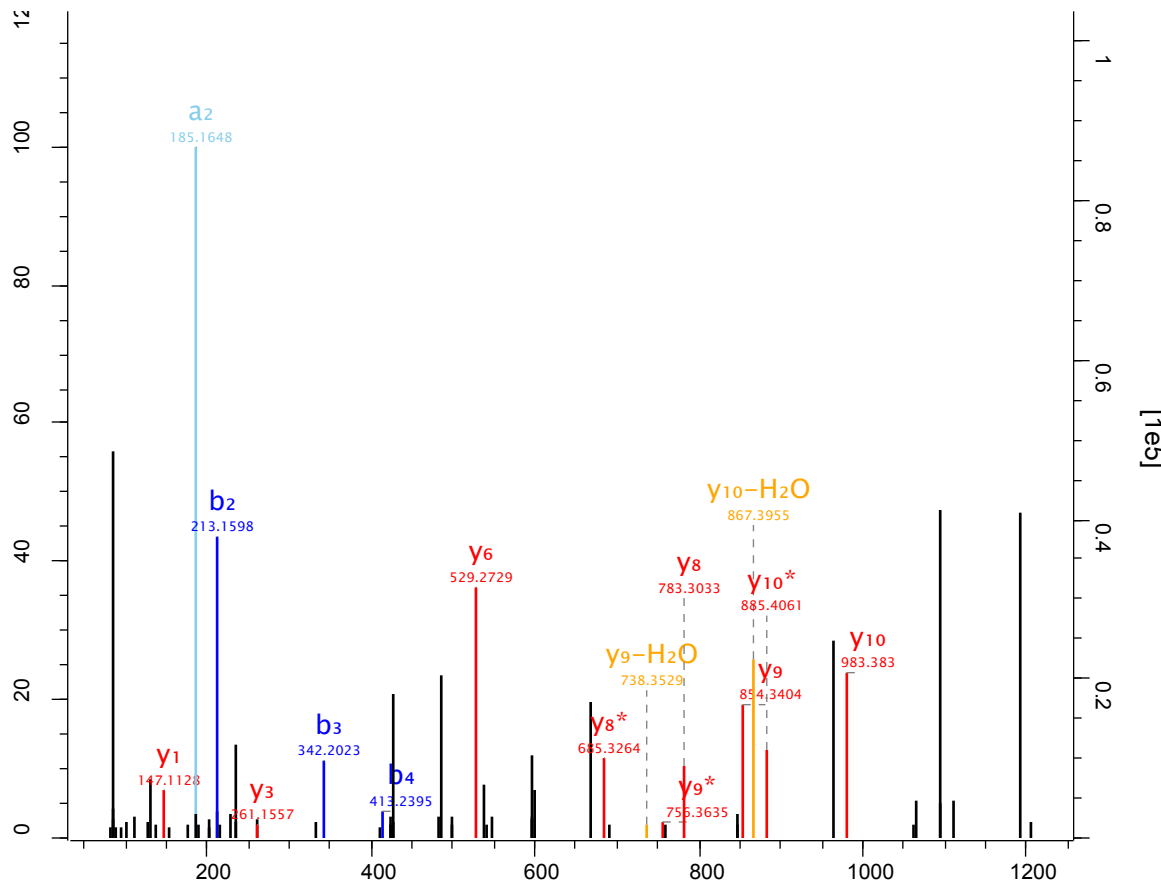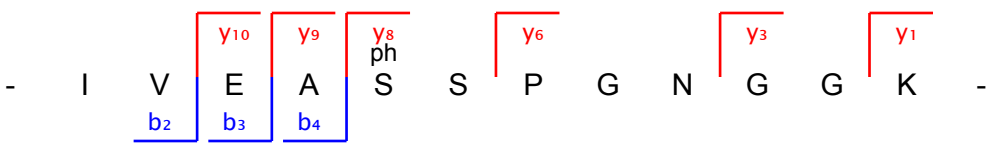



Raw file Scan Method Score m/z  
 201502\_COL14\_38\_45 27401 FTMS; HCD 101.53 674.82

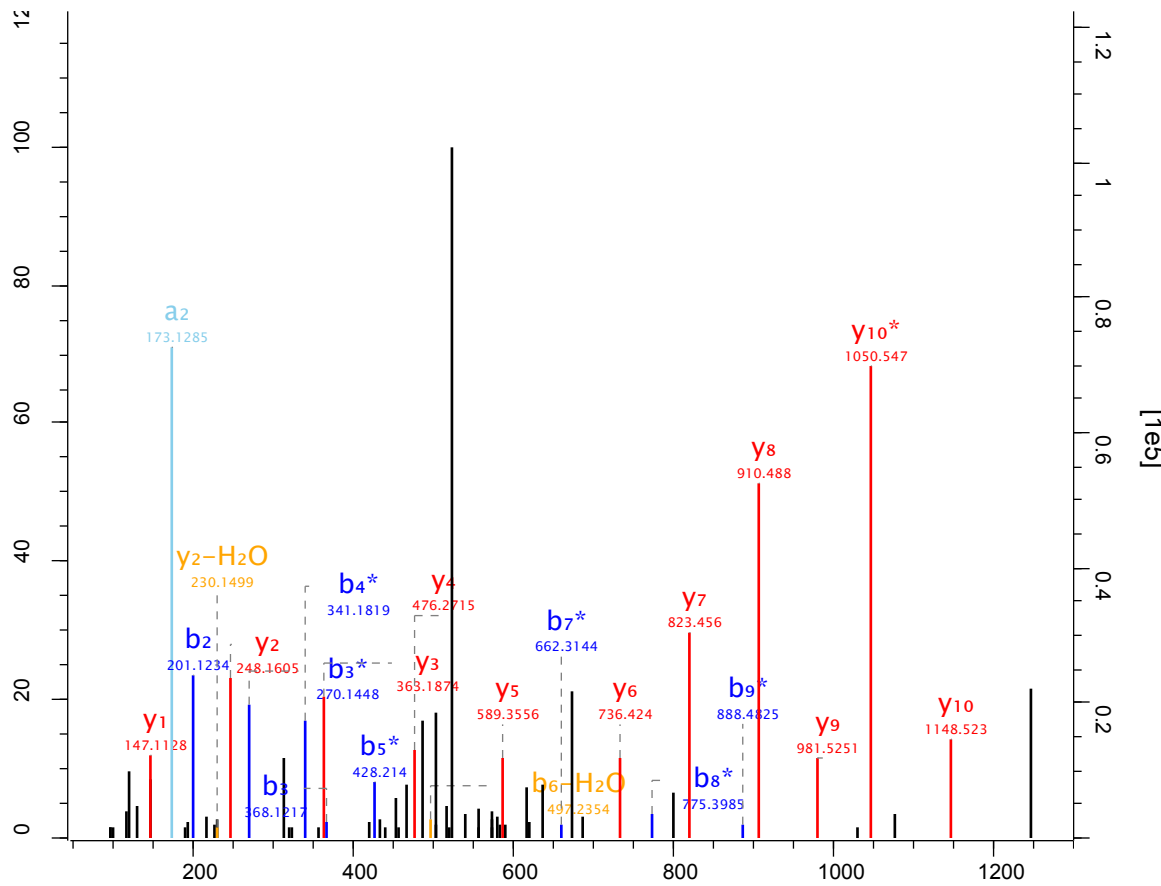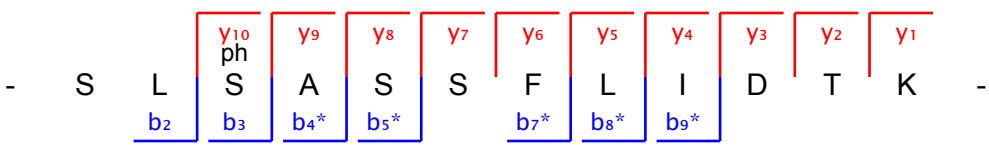

y<sub>10</sub>  
ph  
S

y<sub>9</sub>  
A

y<sub>8</sub>  
S

y<sub>7</sub>  
S

y<sub>6</sub>  
F

y<sub>5</sub>  
L

y<sub>4</sub>  
I

y<sub>3</sub>  
D

y<sub>2</sub>  
T

y<sub>1</sub>  
K

Raw file 201502\_COL14\_38\_45 Scan 27812 Method FTMS; HCD Score 77.08 m/z 820.37

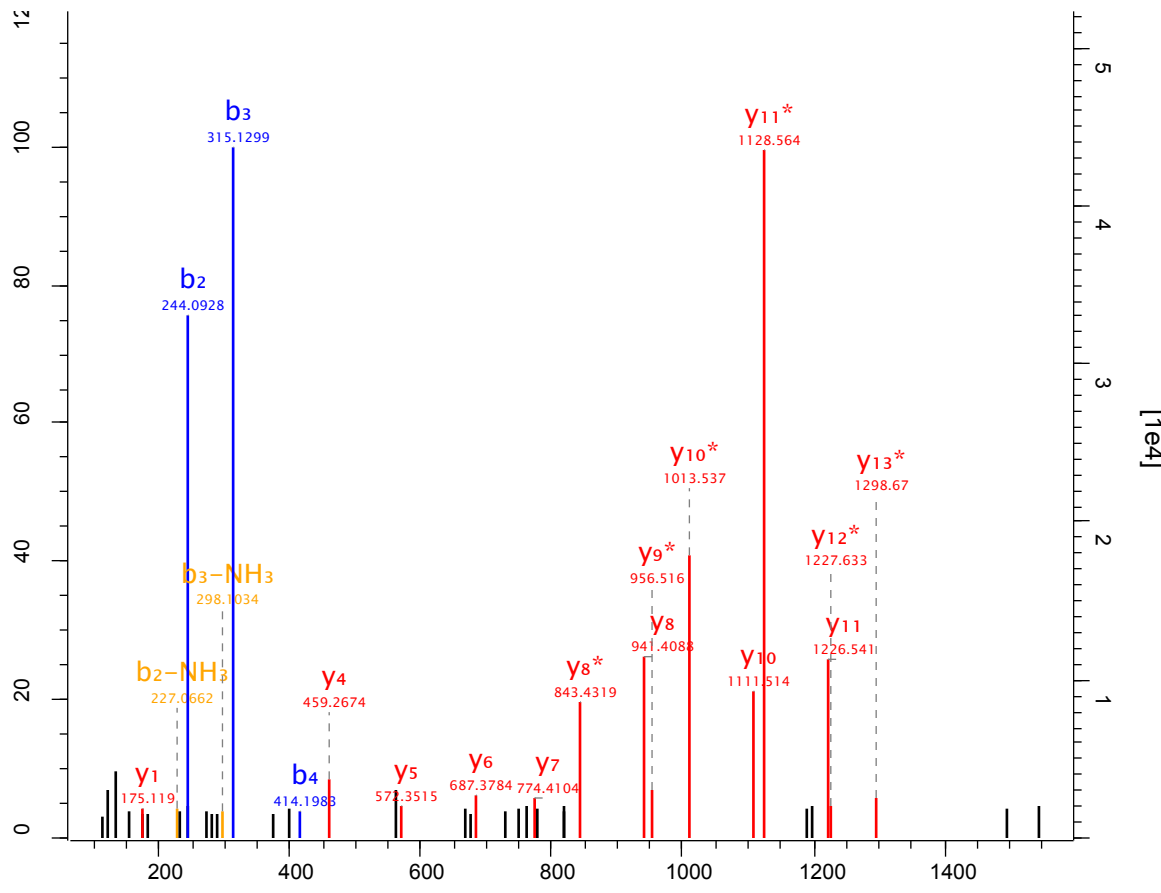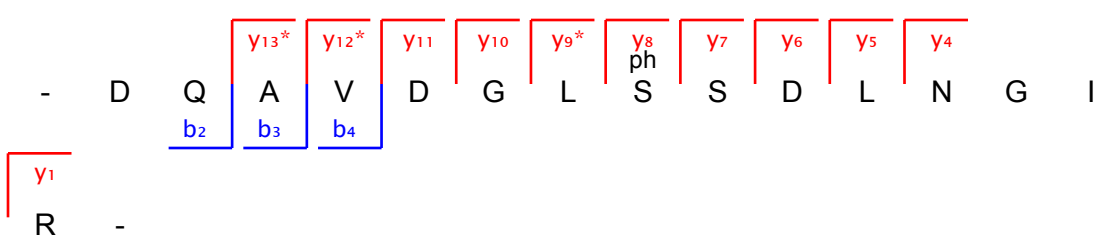

| Raw file           | Scan | Method    | Score | m/z    |
|--------------------|------|-----------|-------|--------|
| 201502_COL14_38_45 | 2823 | FTMS; HCD | 40.52 | 476.52 |

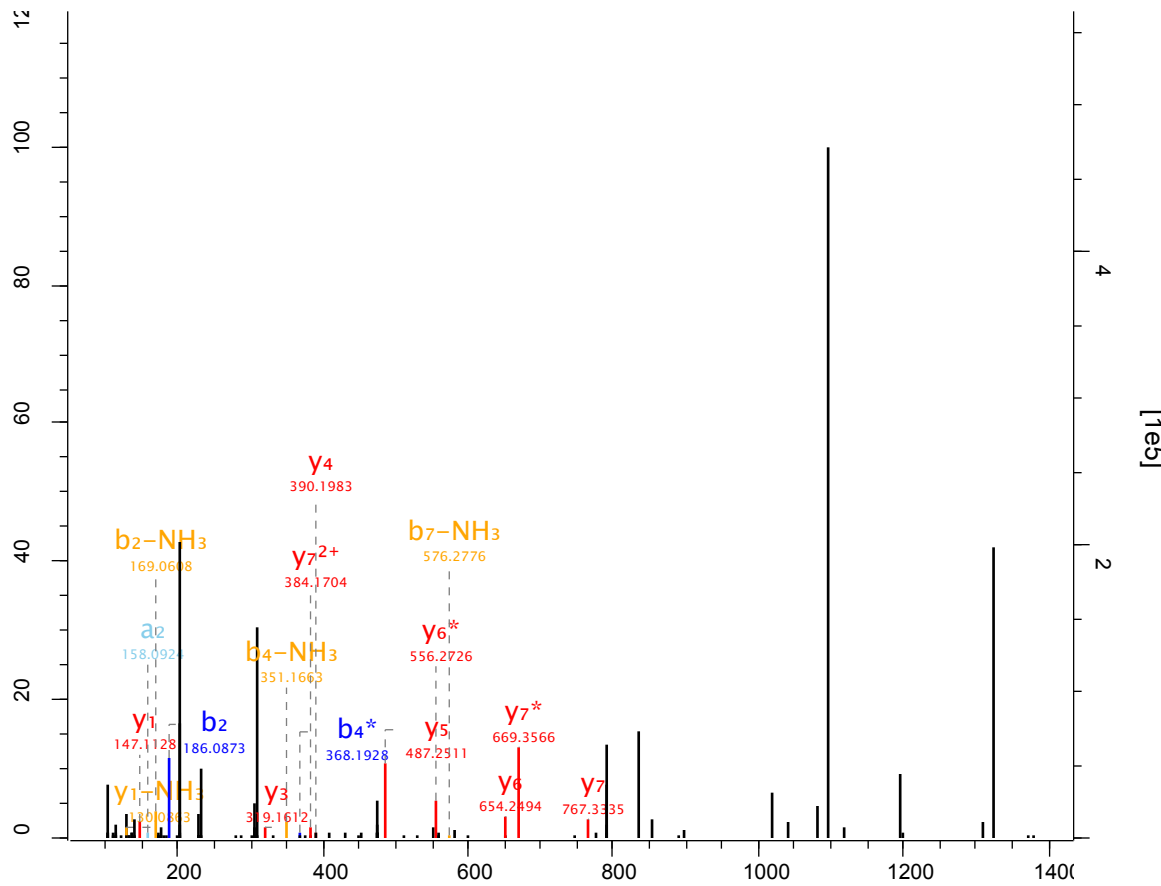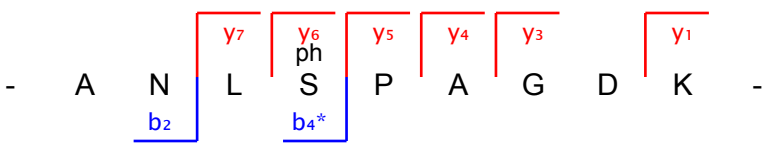

Raw file Scan Method Score m/z  
 201502\_COL14\_38\_45 28727 FTMS; HCD 63.06 619.3

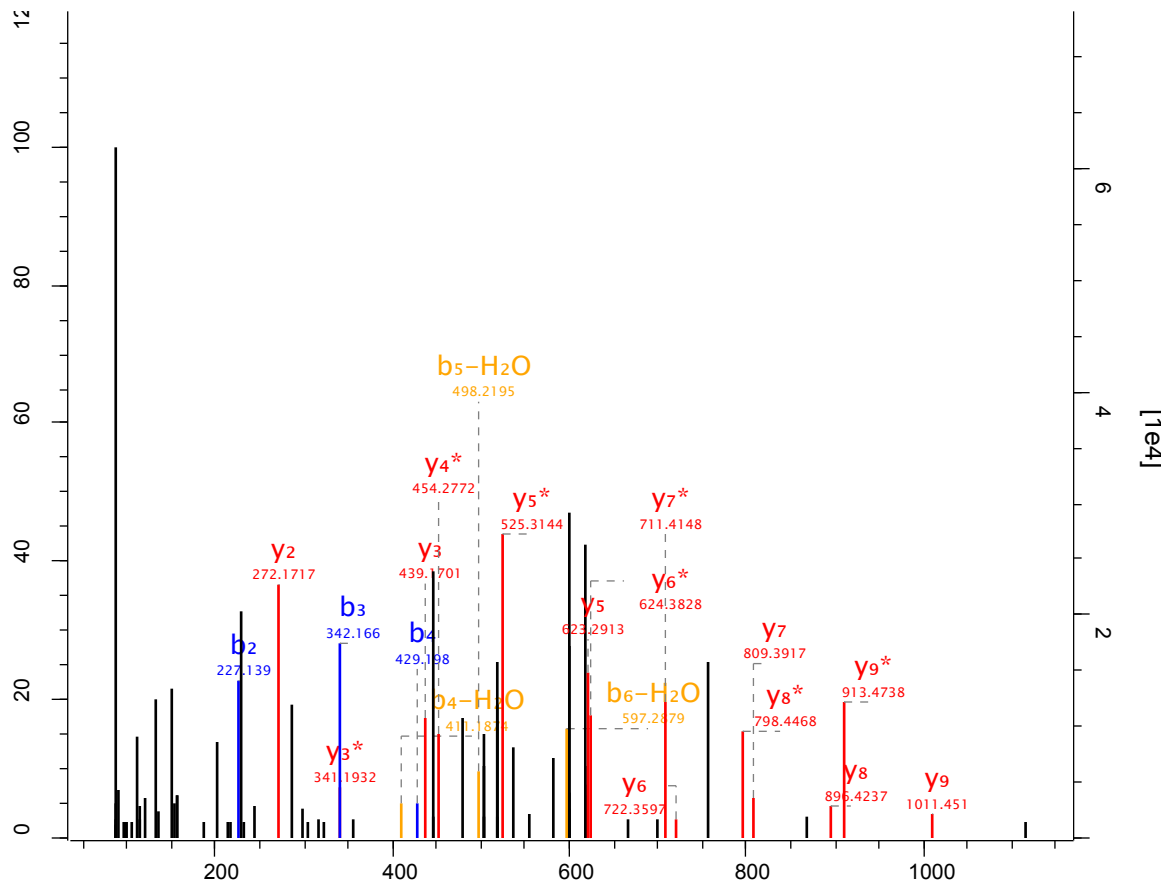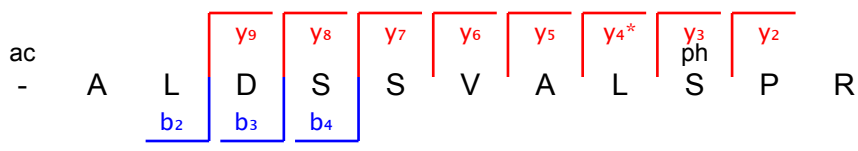

Raw file Scan Method Score m/z  
 201502\_COL14\_38\_45 28840 FTMS; HCD 57.29 679.29

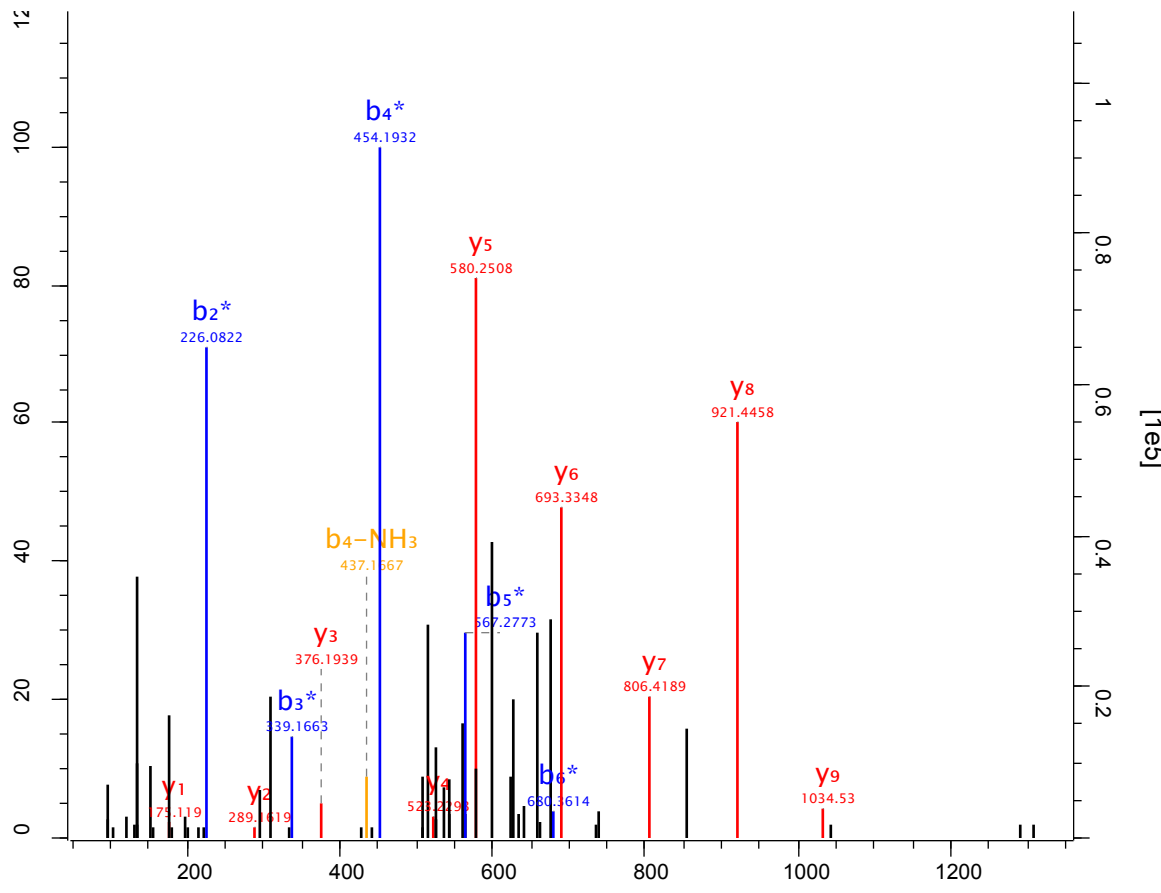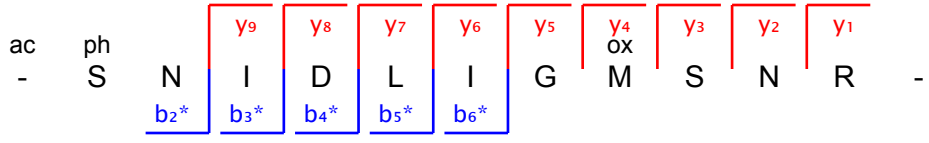

| Raw file           | Scan | Method    | Score | m/z    |
|--------------------|------|-----------|-------|--------|
| 201502_COL14_38_45 | 2917 | FTMS; HCD | 66.99 | 525.74 |

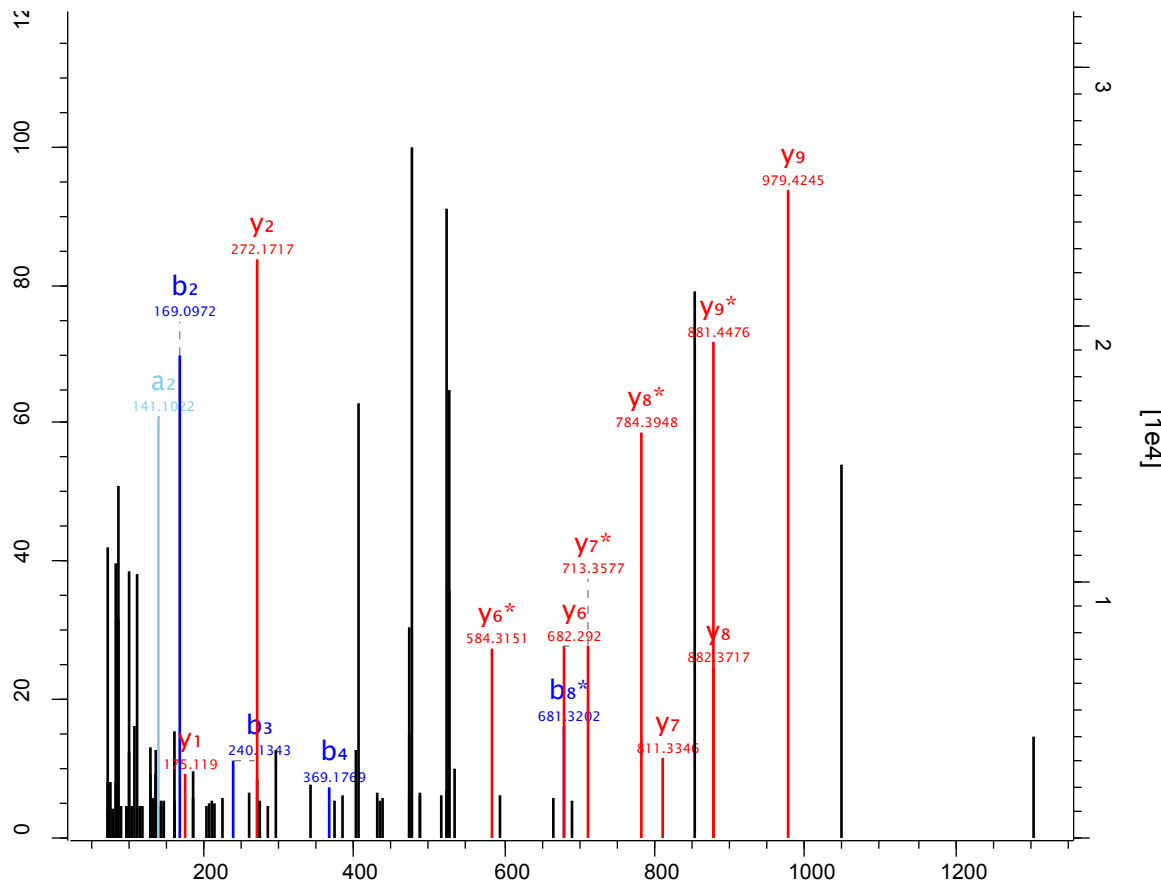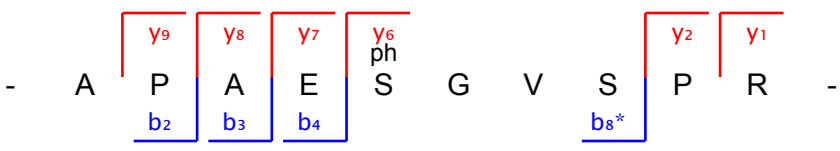

Raw file Scan Method Score m/z  
 201502\_COL14\_38\_45 29922 FTMS; HCD 238.31 815.37

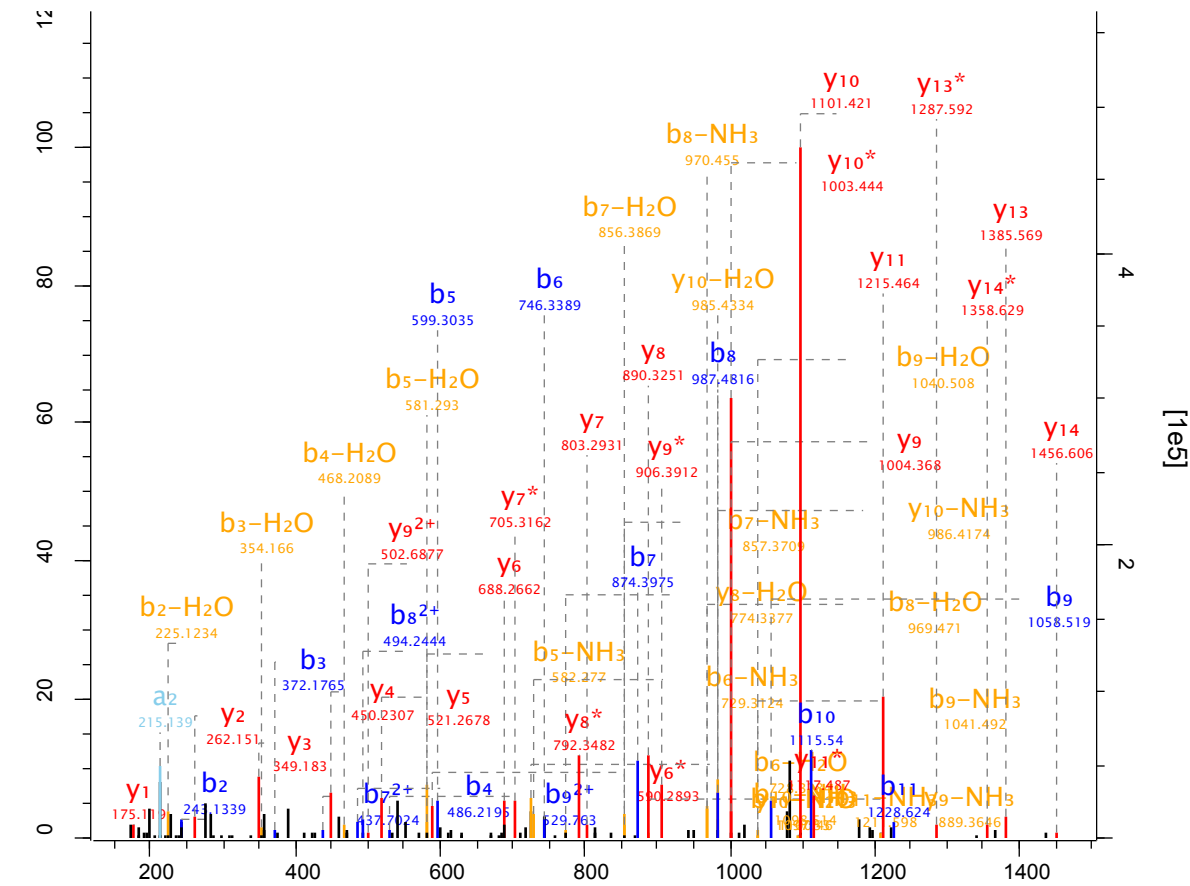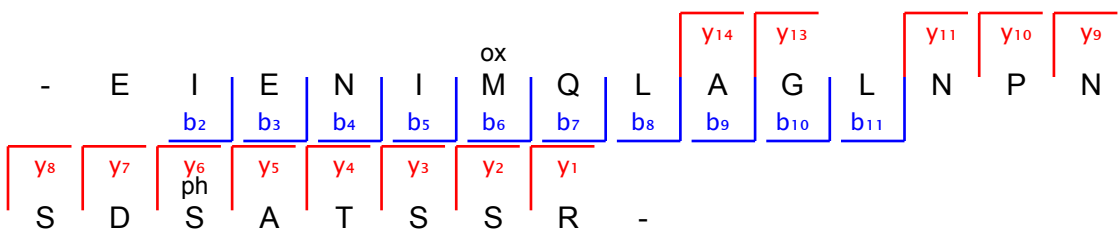

Raw file Scan Method Score m/z  
 201502\_COL14\_38\_45 3084 FTMS; HCD 42.95 680.27

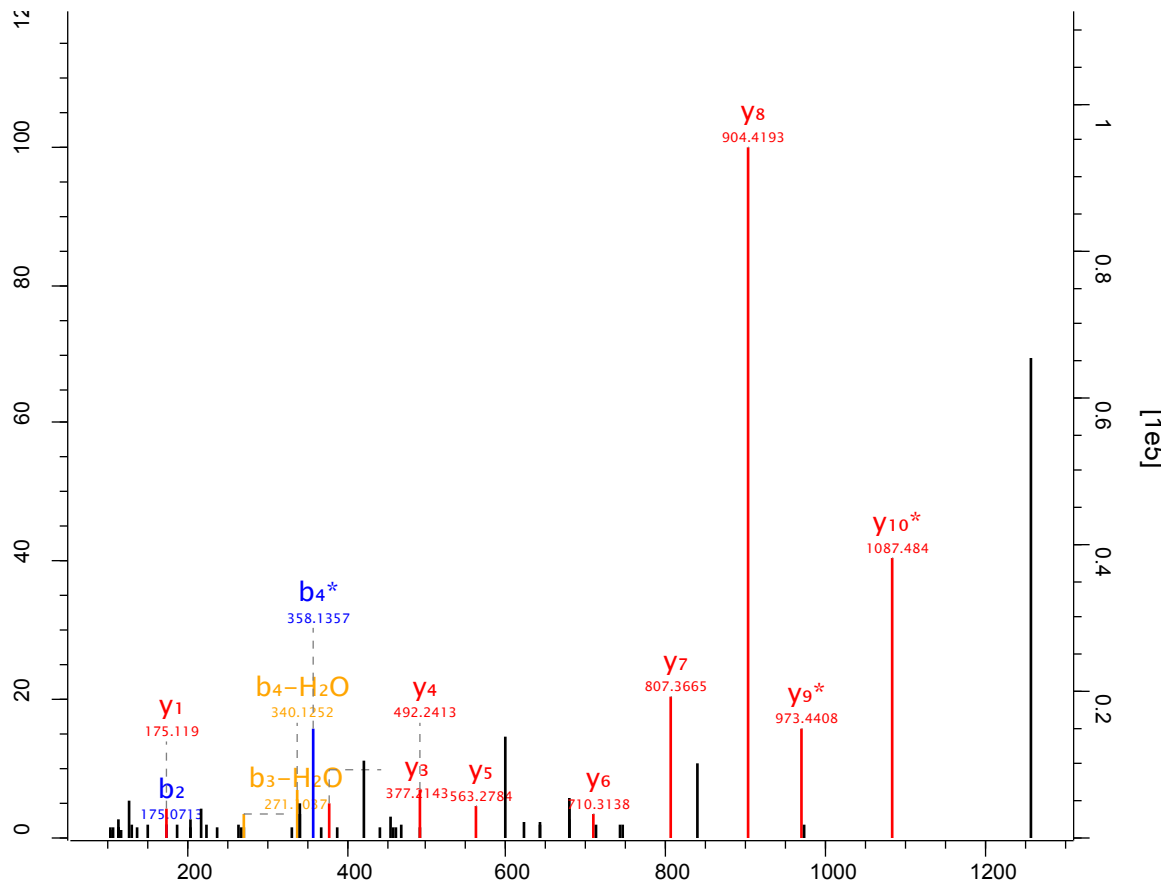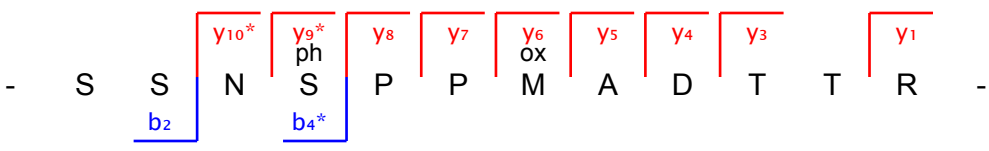



Raw file Scan Method Score m/z  
 201502\_COL14\_38\_45 31564 FTMS; HCD 54.58 1015.43

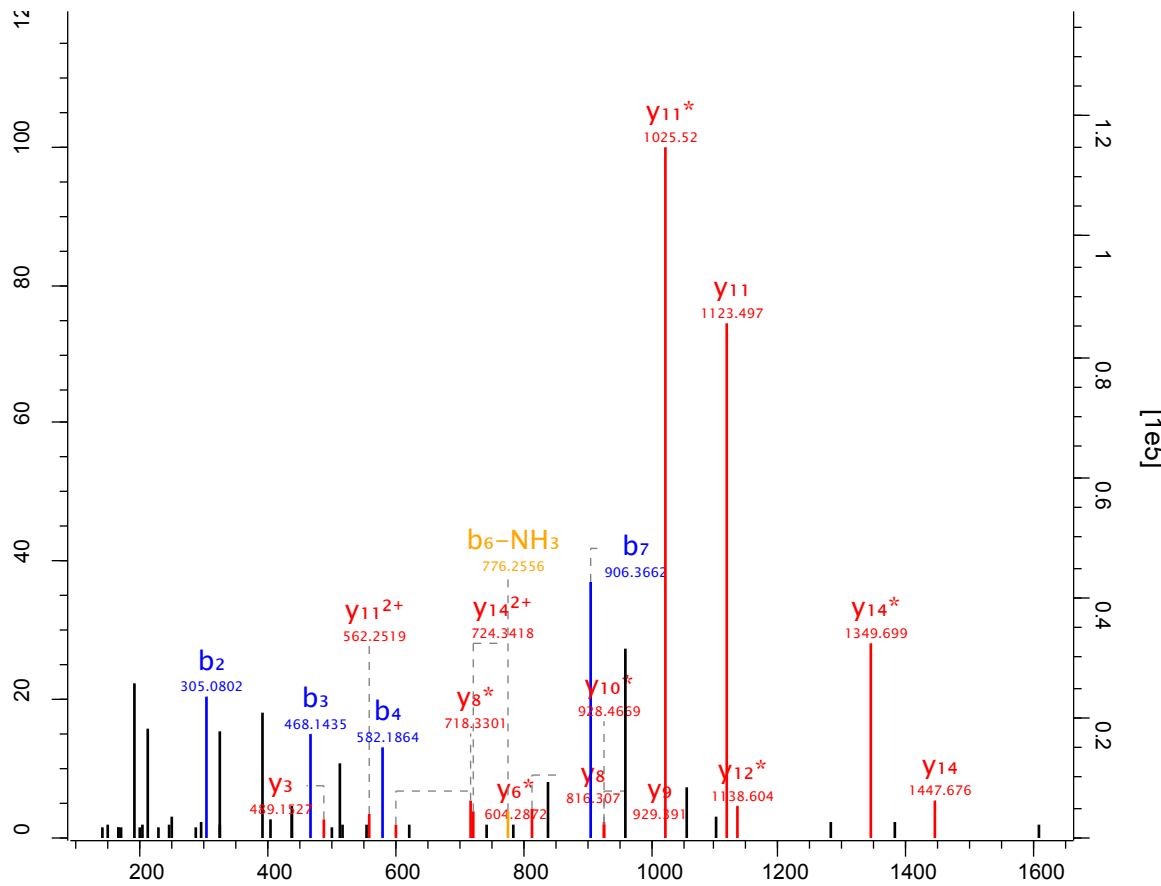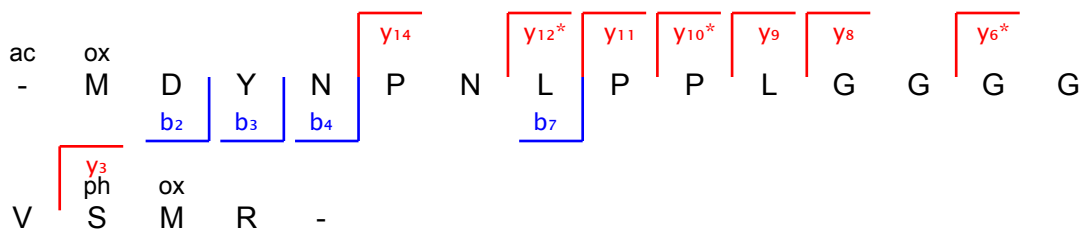

Raw file Scan Method Score m/z  
 201502\_COL14\_38\_45 3207 FTMS; HCD 112.44 550.89

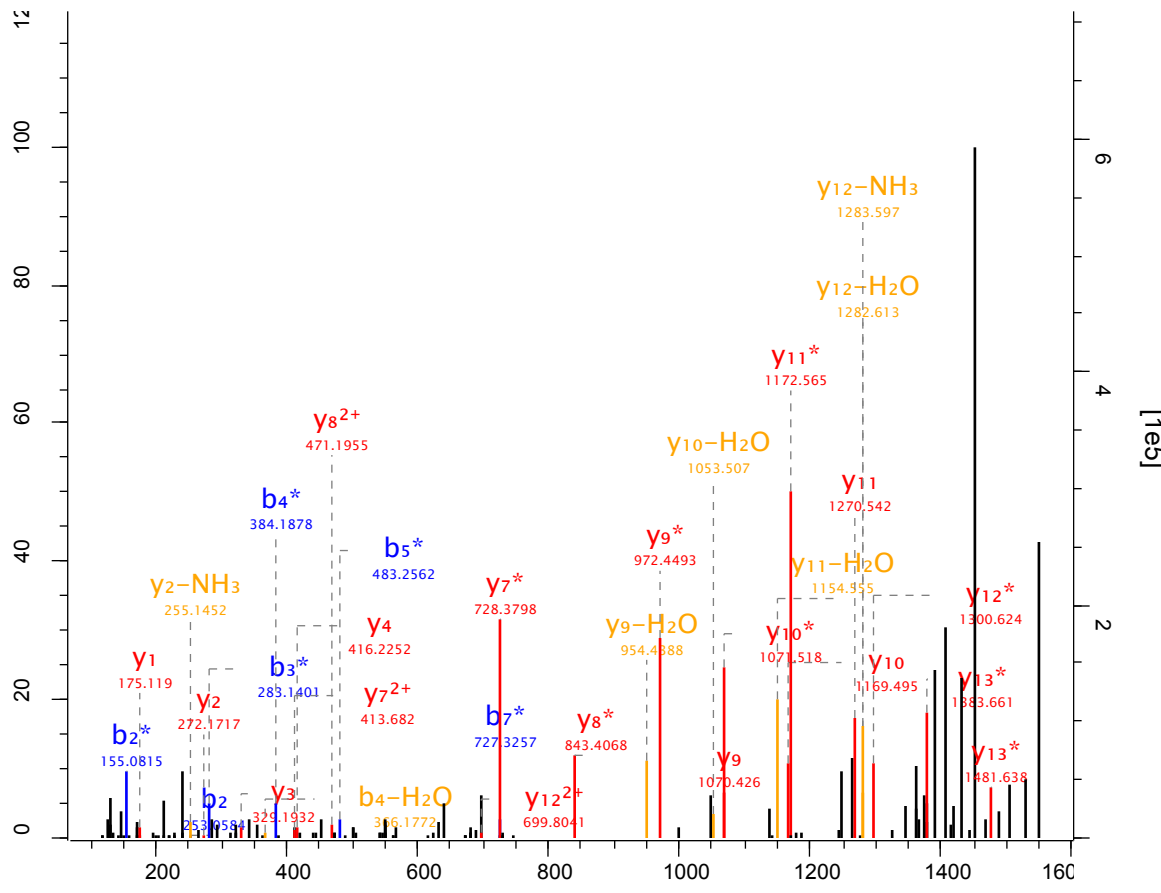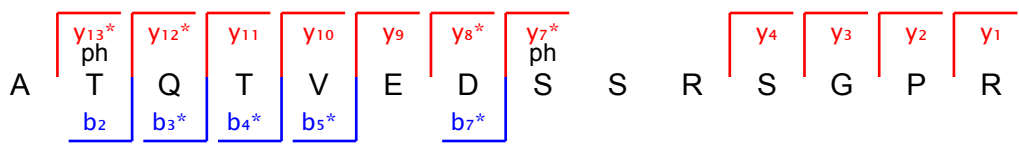

Raw file Scan Method Score m/z  
 201502\_COL14\_38\_45 3223 FTMS; HCD 87.32 670.59

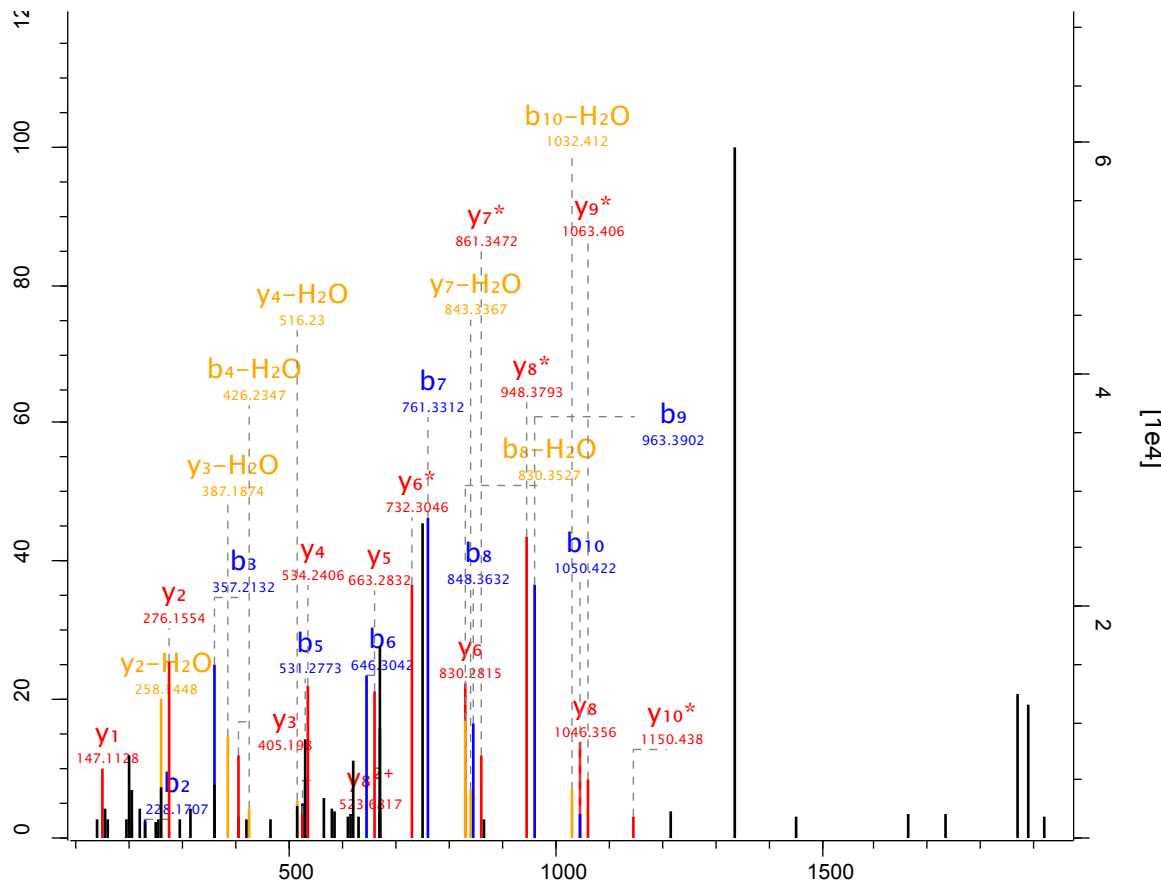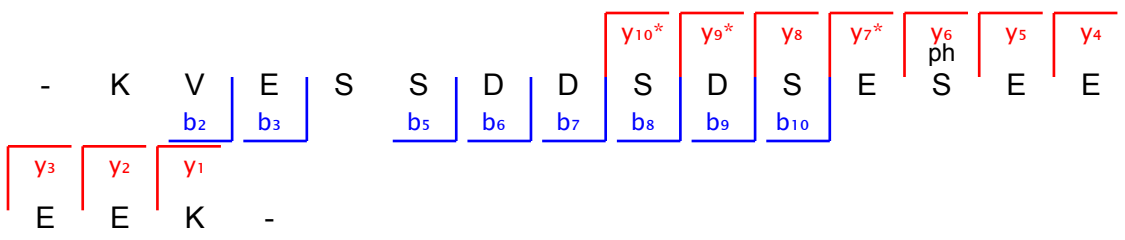

Raw file Scan Method Score m/z  
 201502\_COL14\_38\_45 32499 FTMS; HCD 87.52 794.34

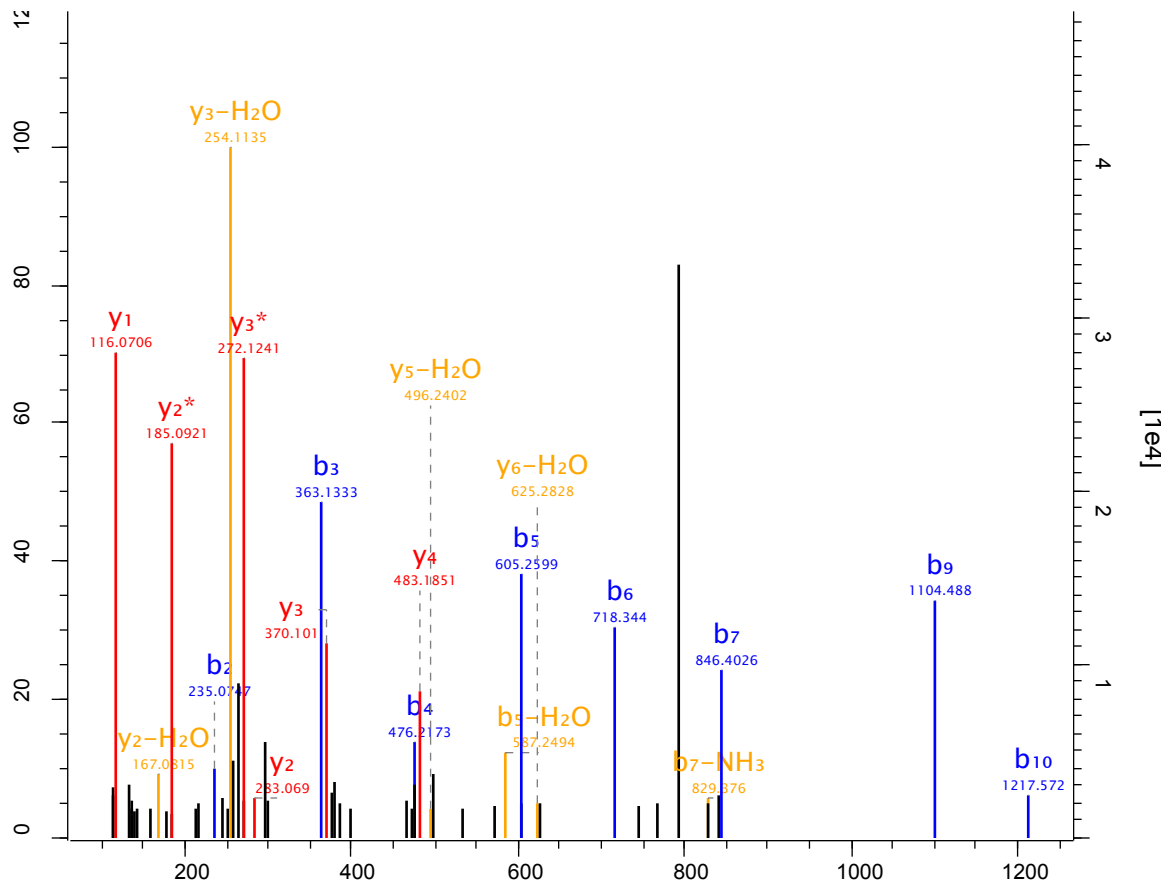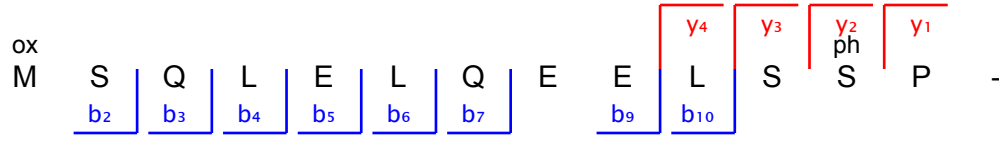

Raw file Scan Method Score m/z  
 201502\_COL14\_38\_45 32913 FTMS; HCD 64.85 908.08

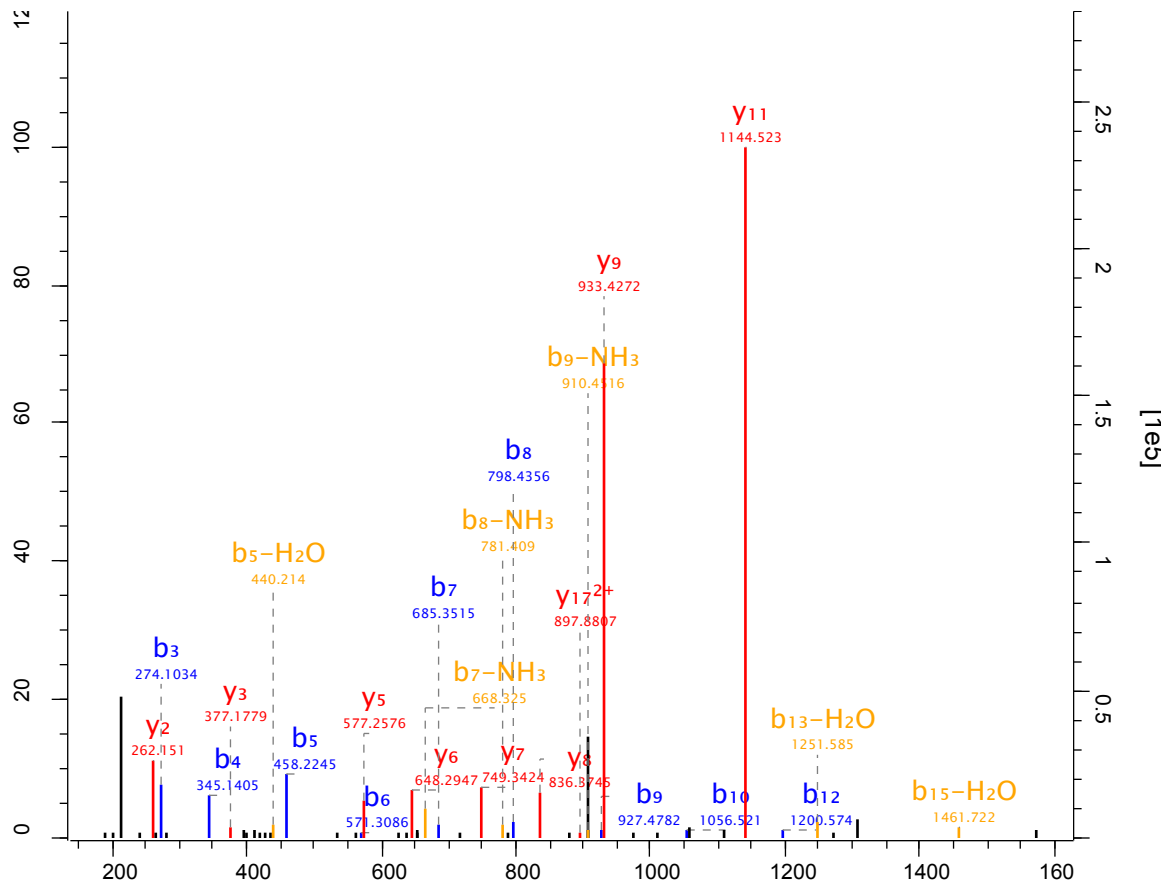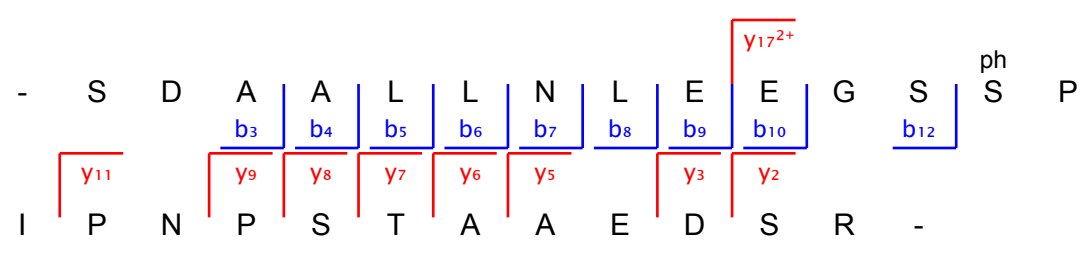

I P N P S T A A E D S R -

Raw file Scan Method Score m/z  
 201502\_COL14\_38\_45 3360 FTMS; HCD 67.65 661.61

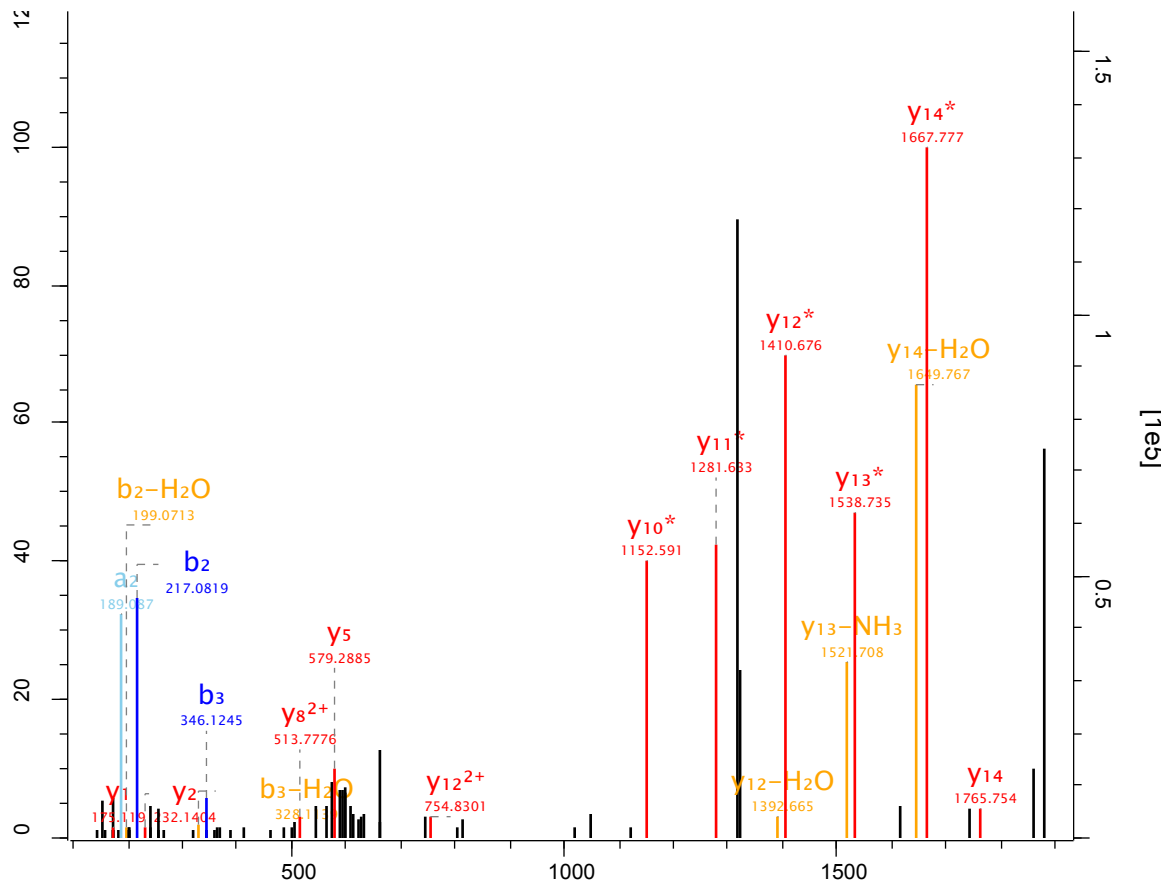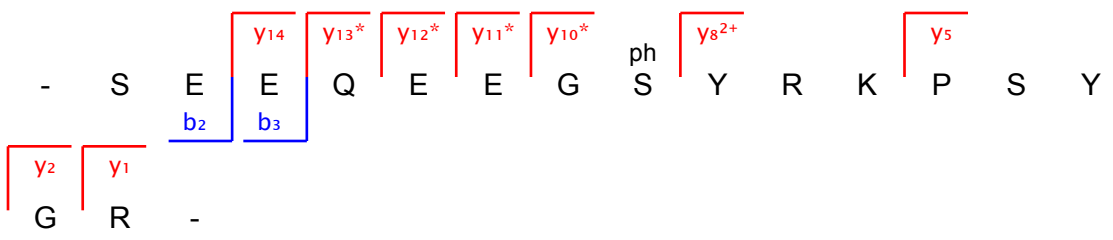

Raw file Scan Method Score m/z  
 201502\_COL14\_38\_45 34299 FTMS; HCD 128.05 750.31

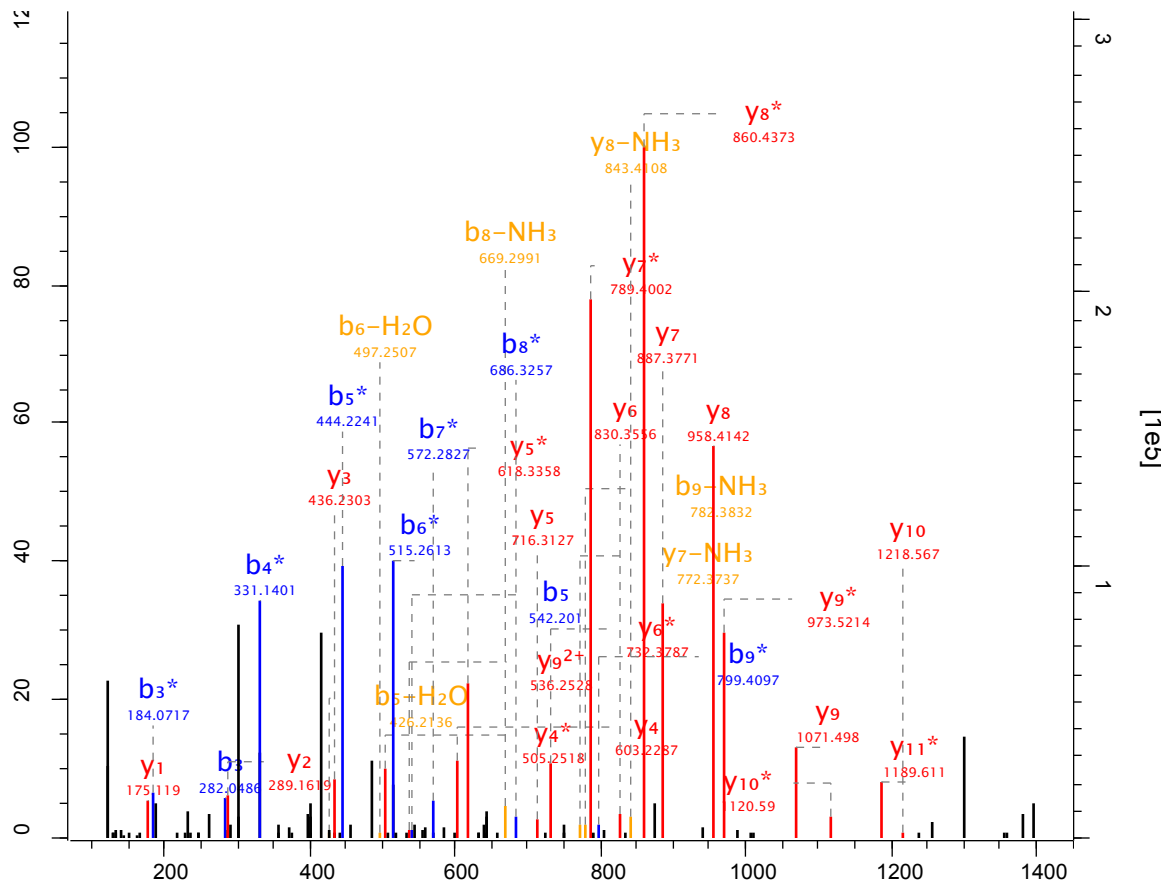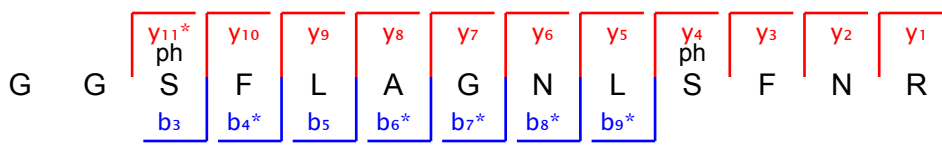

Raw file Scan Method Score m/z  
 201502\_COL14\_38\_45 34365 FTMS; HCD 46.89 841.37

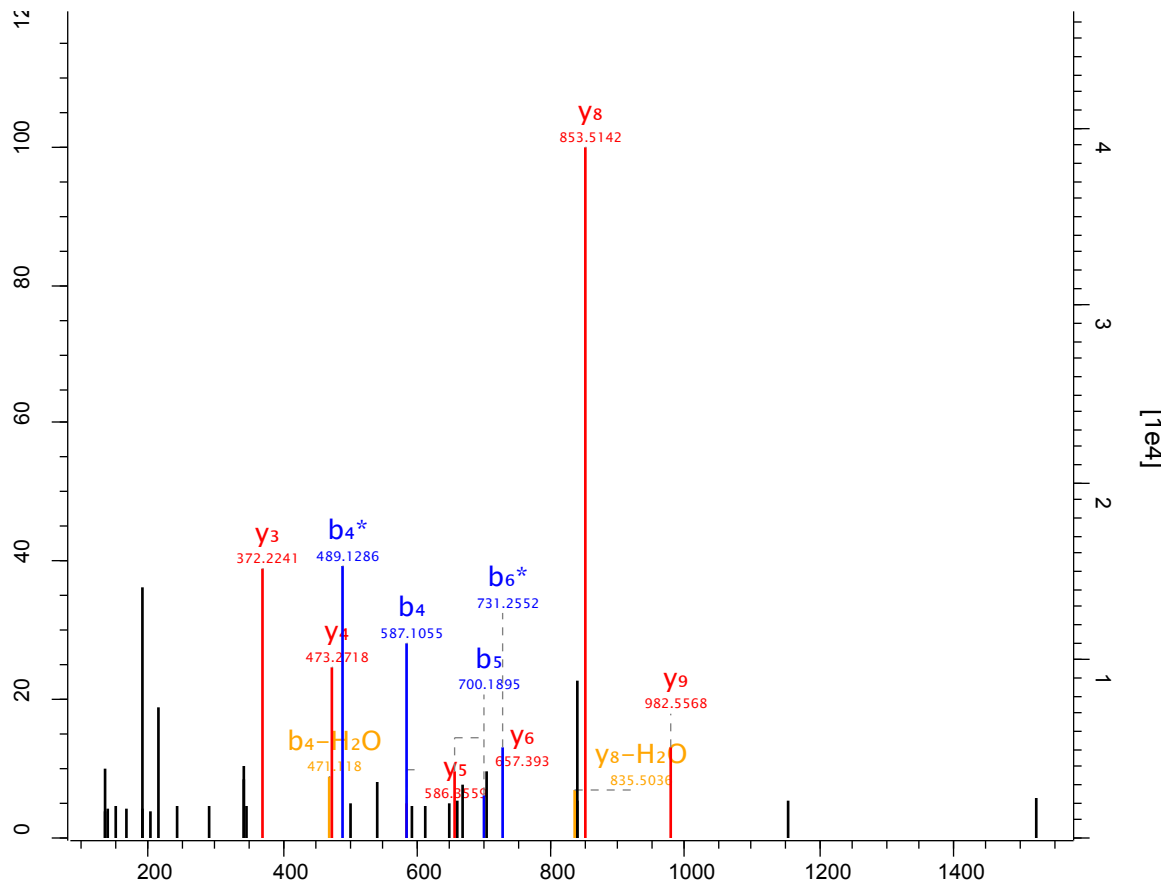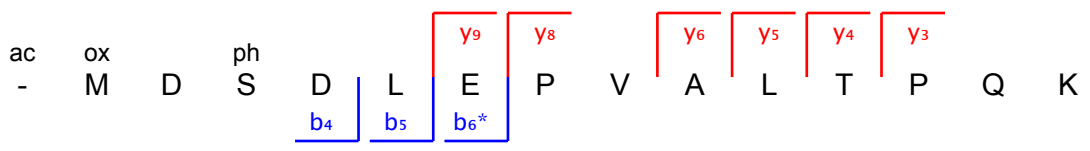



Raw file Scan Method Score m/z  
 201502\_COL14\_38\_45 3496 FTMS; HCD 82.53 620.27

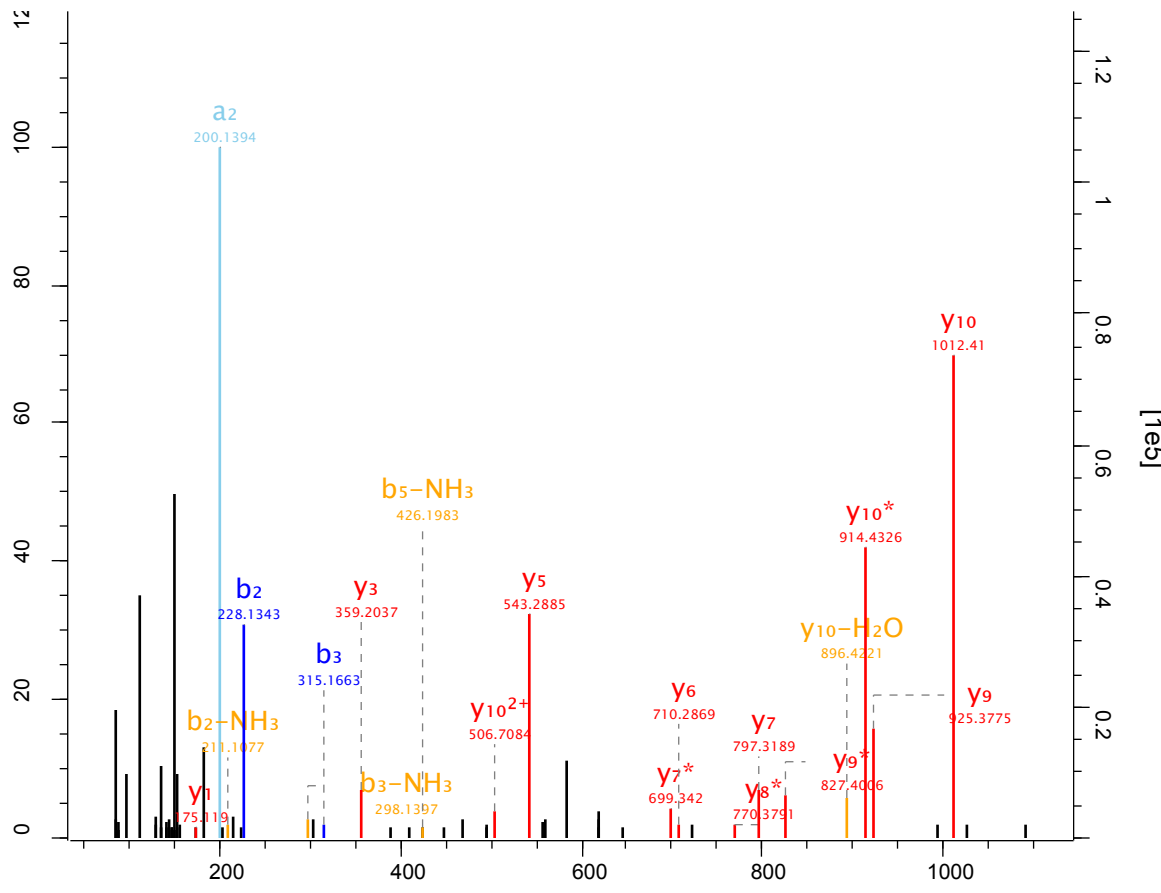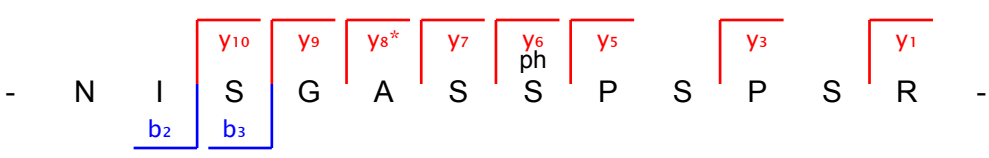

| Raw file           | Scan | Method    | Score | m/z    |
|--------------------|------|-----------|-------|--------|
| 201502_COL14_38_45 | 3511 | FTMS; HCD | 57.11 | 616.64 |

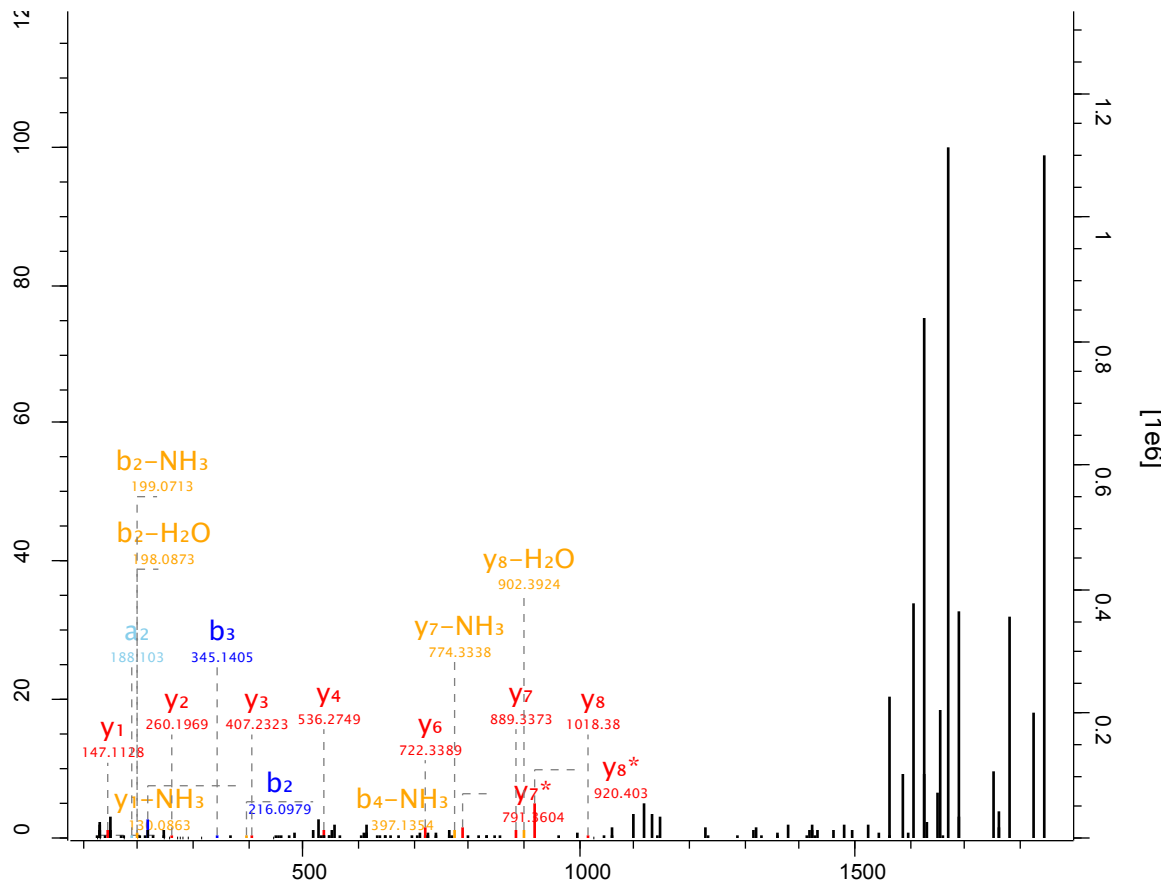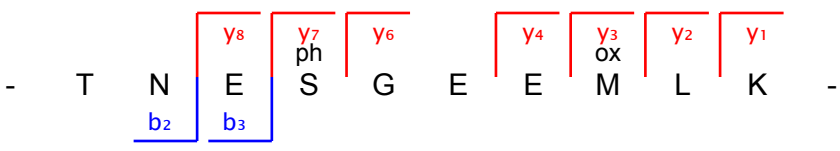

| Raw file           | Scan | Method    | Score | m/z    |
|--------------------|------|-----------|-------|--------|
| 201502_COL14_38_45 | 3516 | FTMS; HCD | 53.04 | 465.85 |

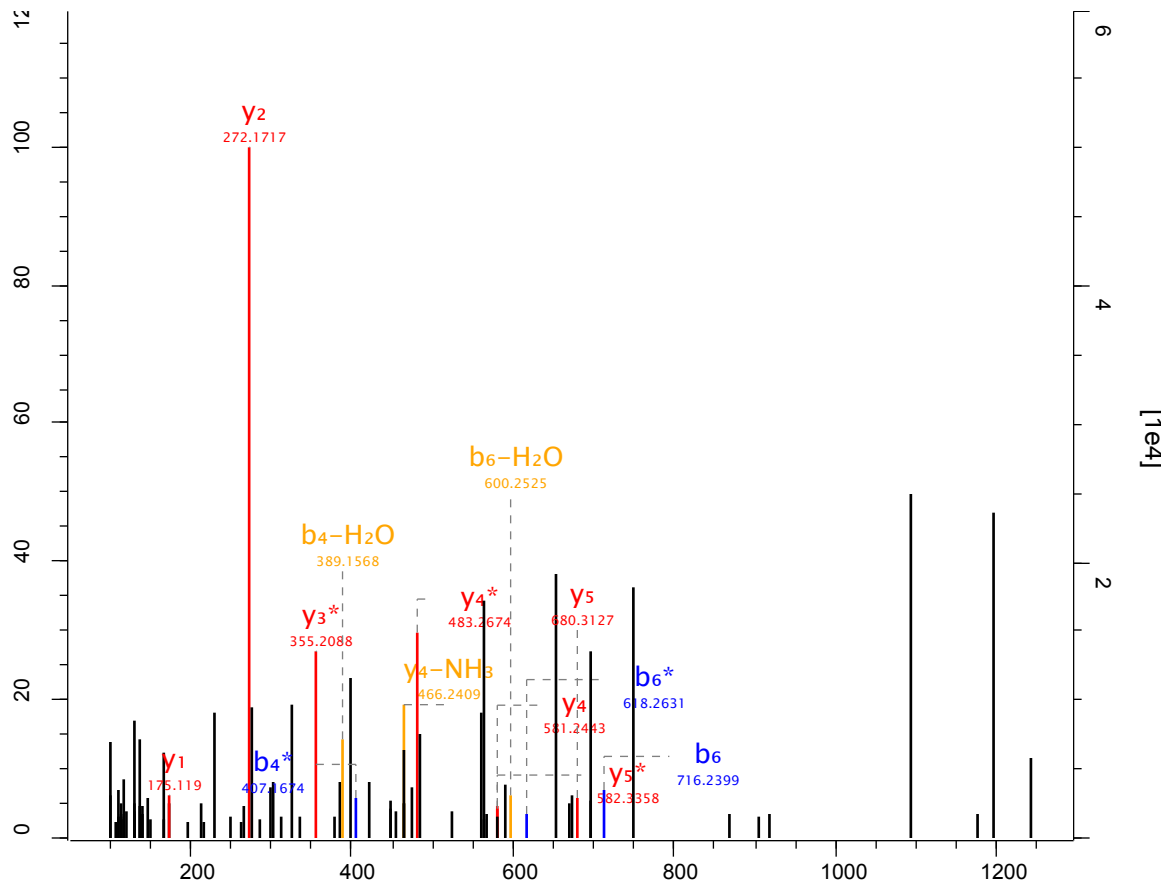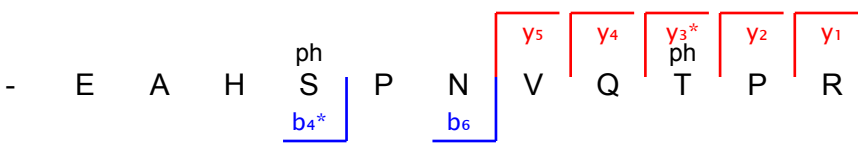

Raw file 201502\_COL14\_38\_45 Scan 37467 Method FTMS; HCD Score 46.07 m/z 843.37

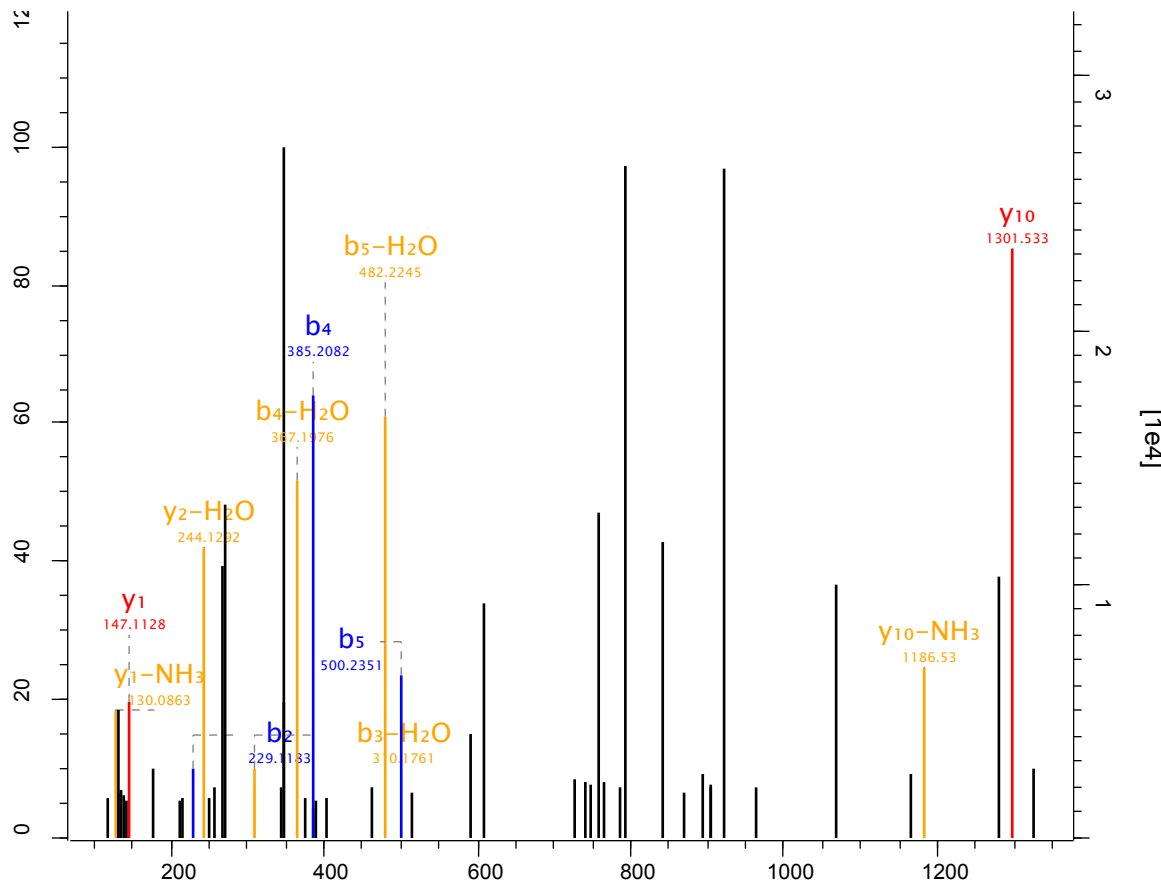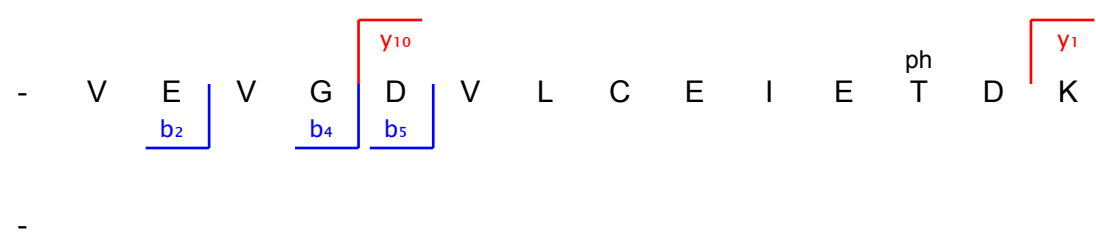

Raw file 201502\_COL14\_38\_45 Scan 38016 Method FTMS; HCD Score 187.79 m/z 1195

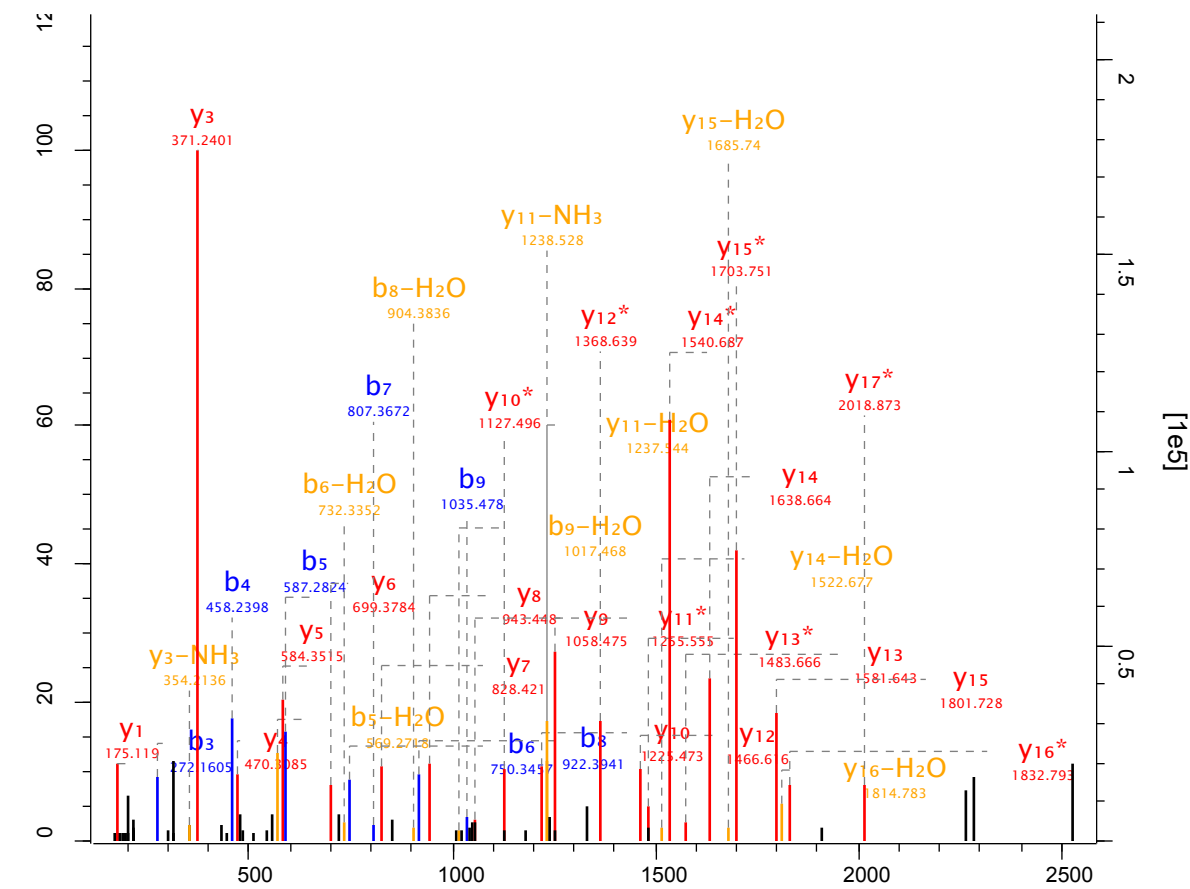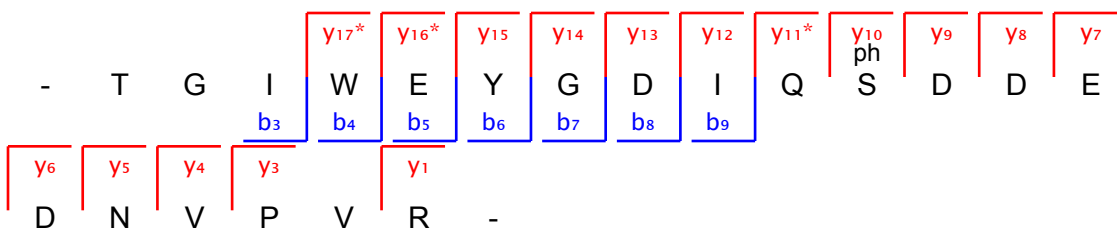

Raw file Scan Method Score m/z  
 201502\_COL14\_38\_45 38090 FTMS; HCD 47.88 1115.53

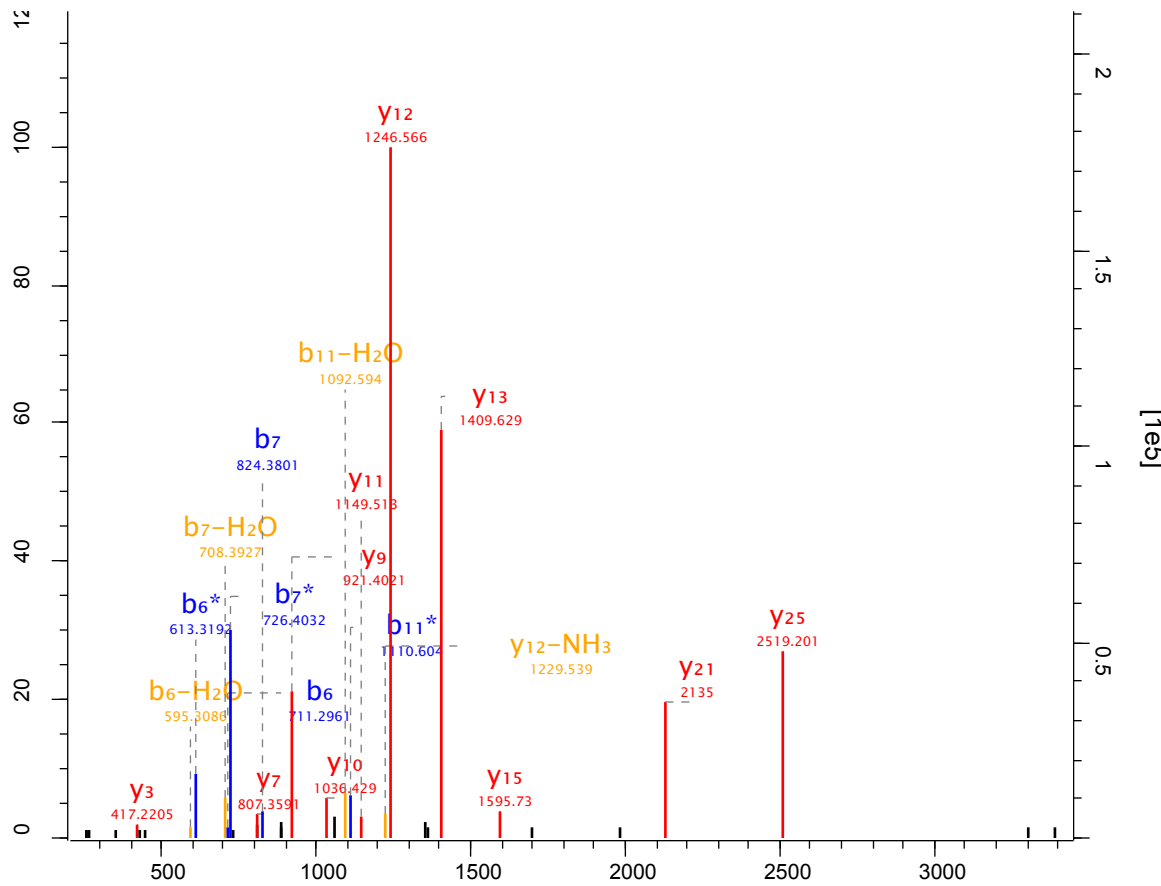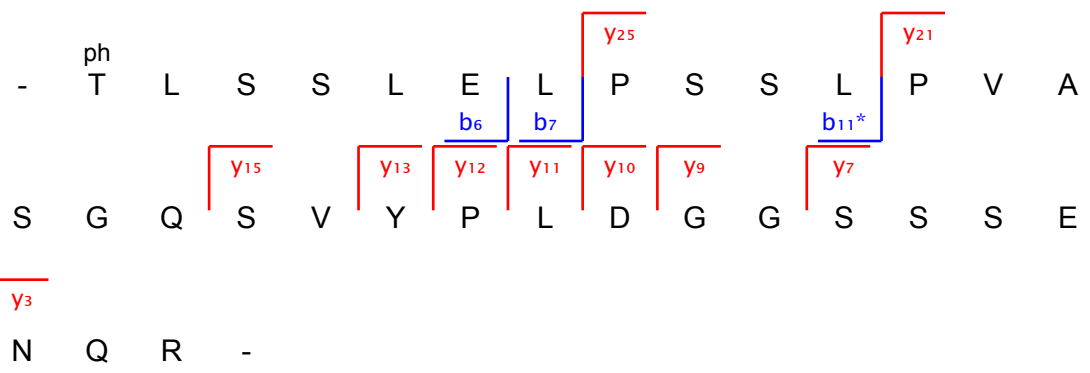

Raw file Scan Method Score m/z  
 201502\_COL14\_38\_45 40616 FTMS; HCD 252.13 1159.49

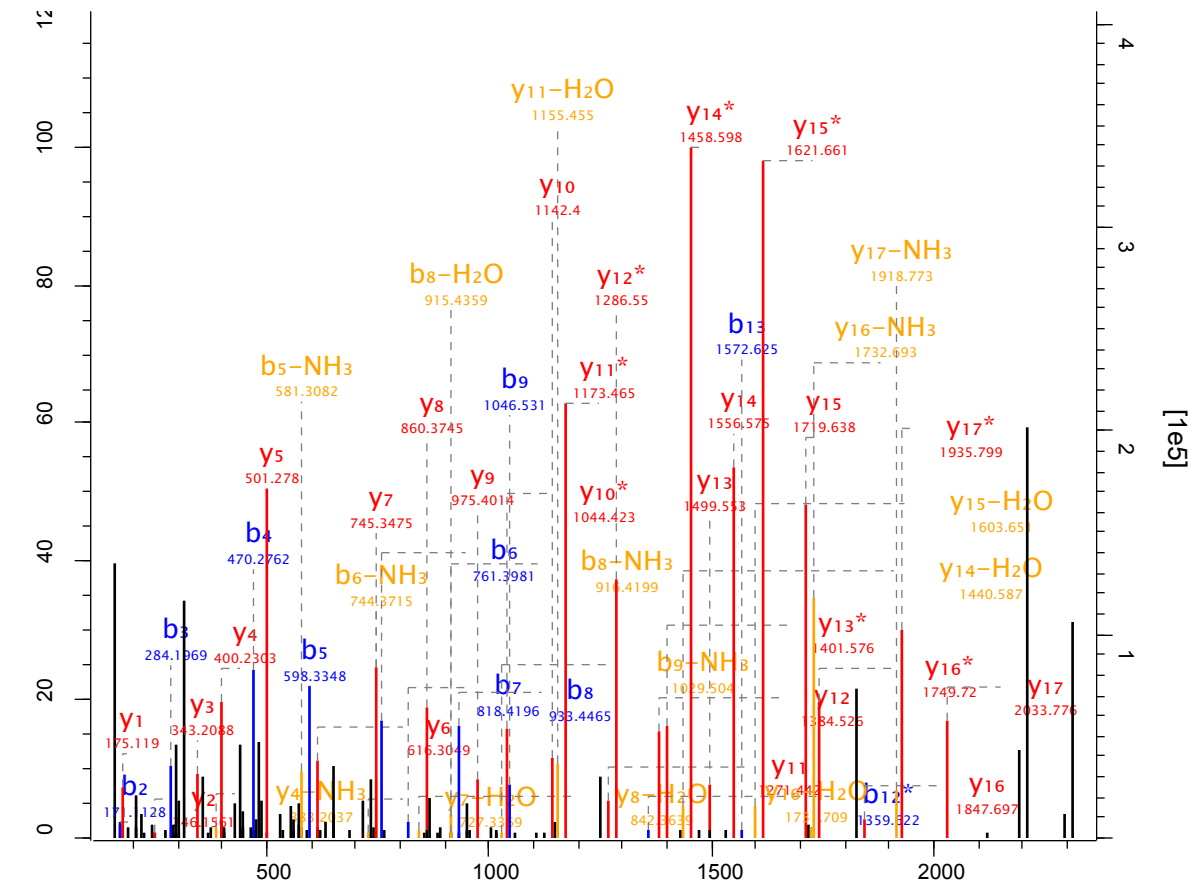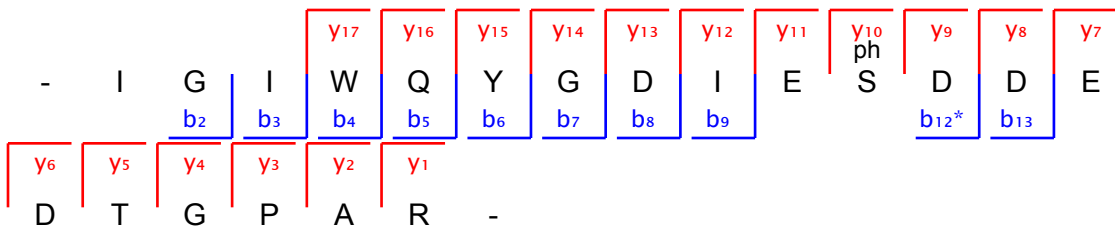

Raw file 201502\_COL14\_38\_45 Scan 41569 Method FTMS; HCD Score 119.23 m/z 1049.22

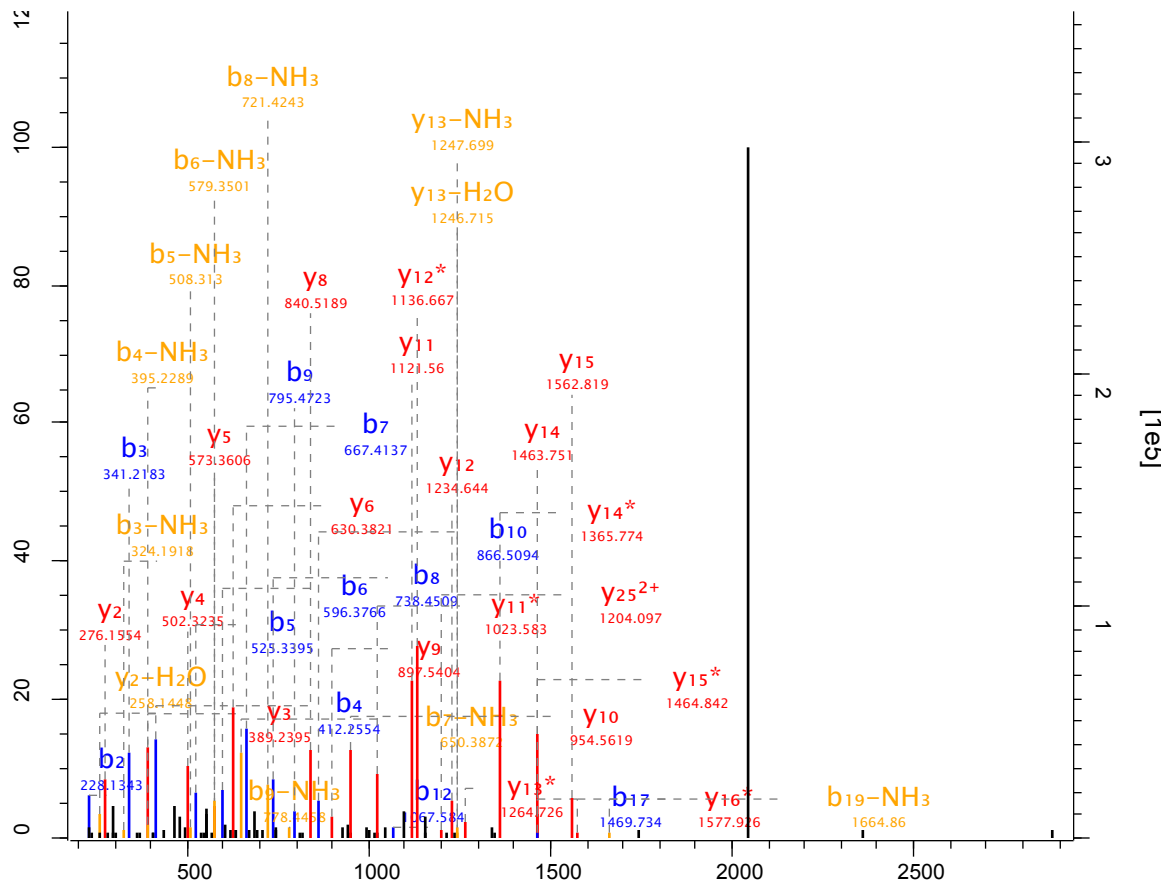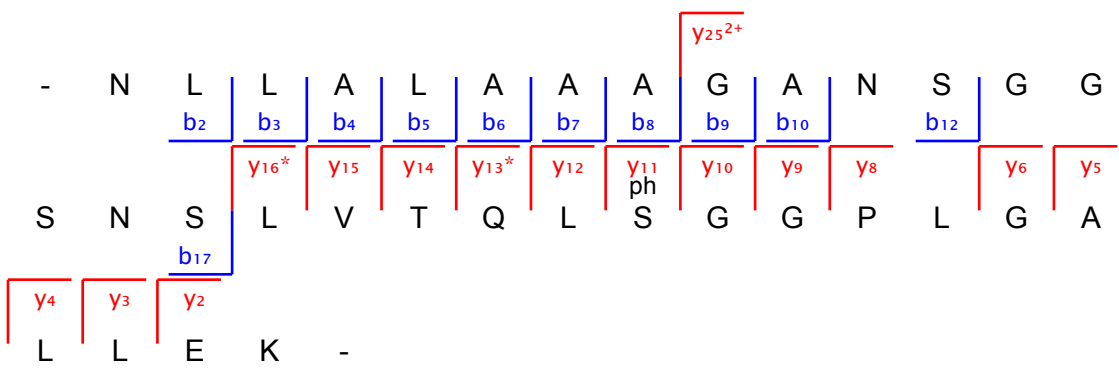



Raw file Scan Method Score m/z  
 201502\_COL14\_38\_45 4199 FTMS; HCD 78.51 626.72

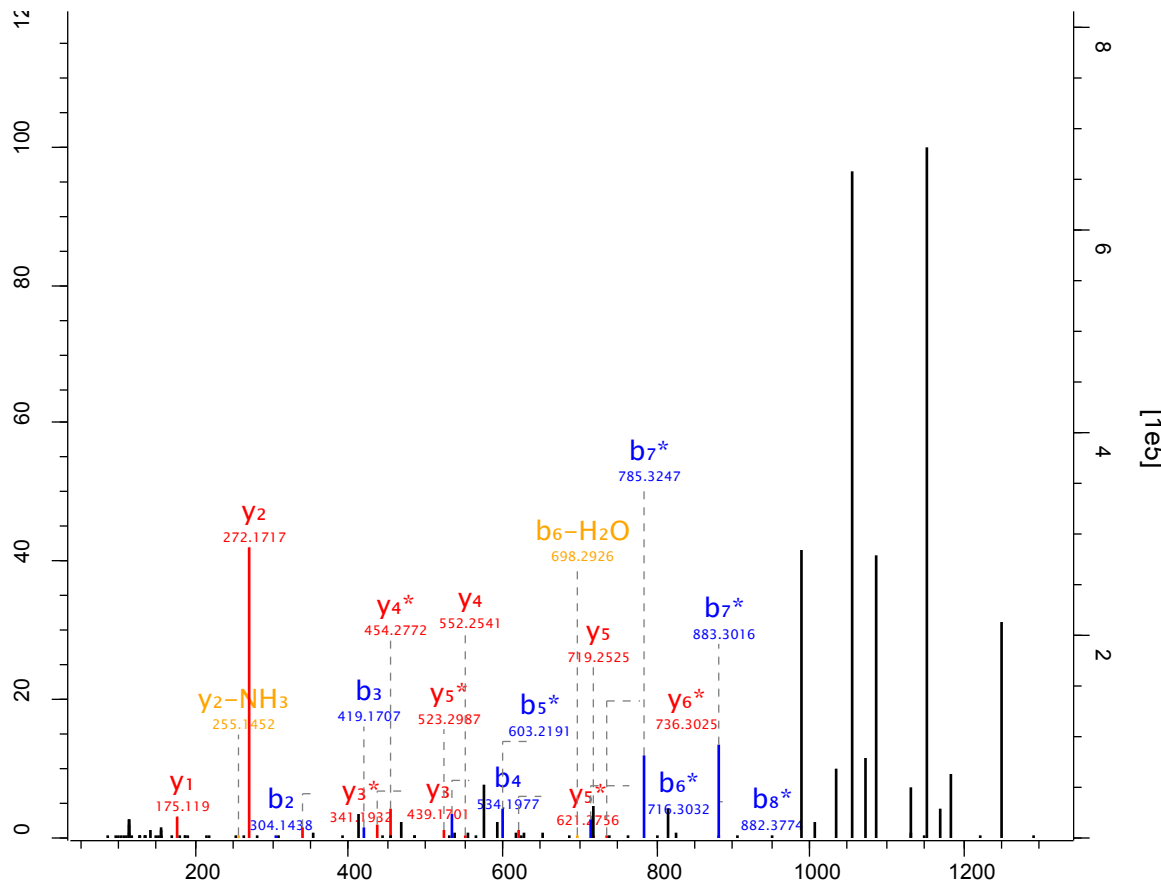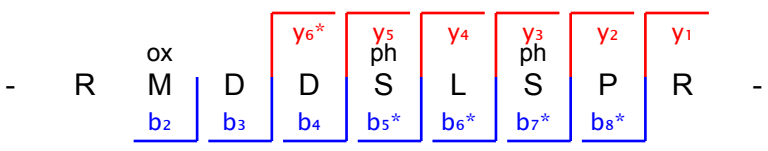

Raw file 201502\_COL14\_38\_45 Scan 4363 Method FTMS; HCD Score 158.44 m/z 706.95

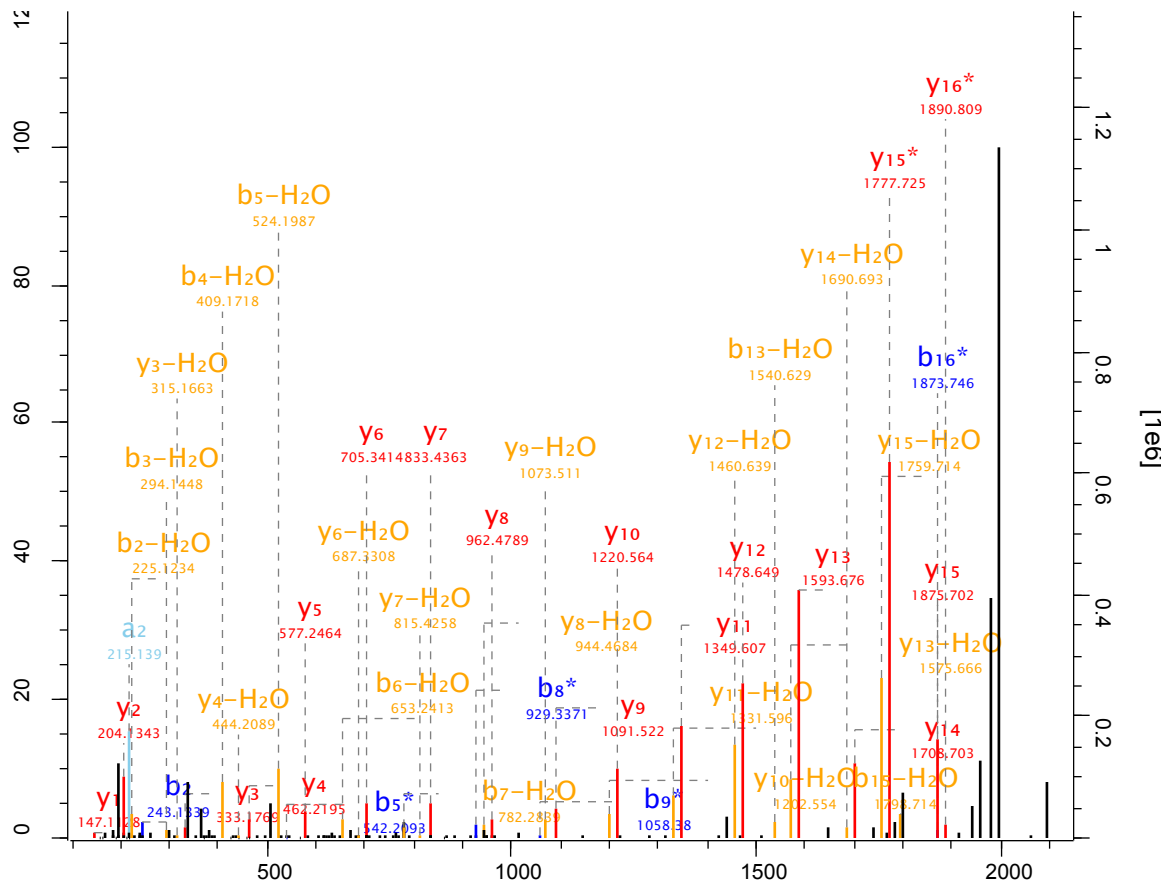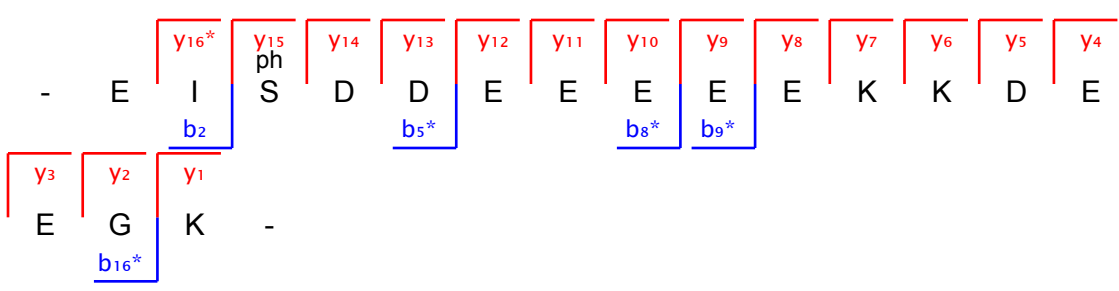

| Raw file           | Scan | Method    | Score | m/z    |
|--------------------|------|-----------|-------|--------|
| 201502_COL14_38_45 | 4493 | FTMS; HCD | 48.98 | 475.24 |

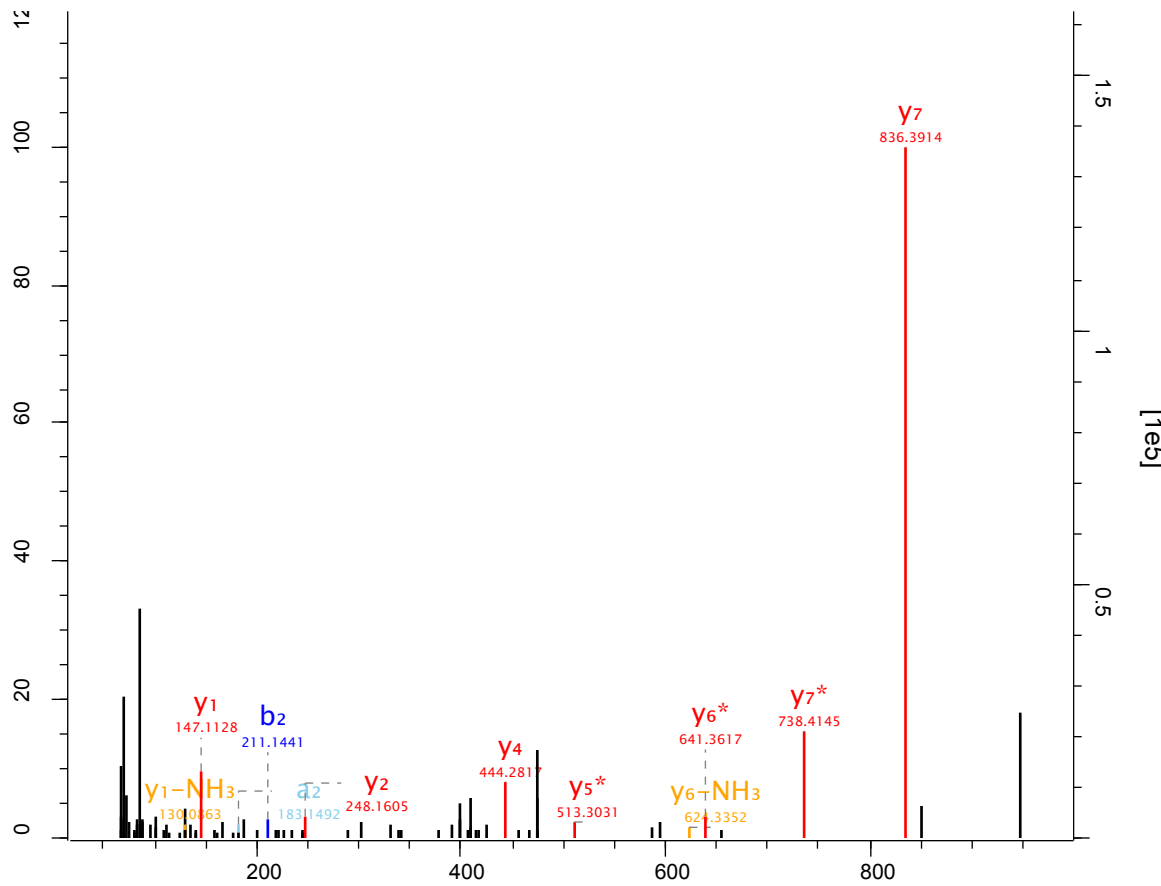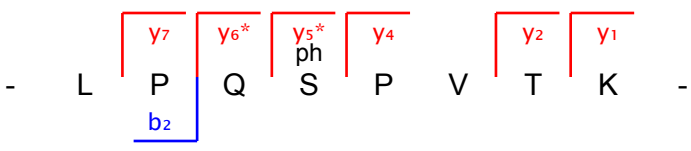

Raw file

Scan Method

Score

m/z

201502\_COL14\_38\_45

4519

FTMS; HCD

103.04

690.3

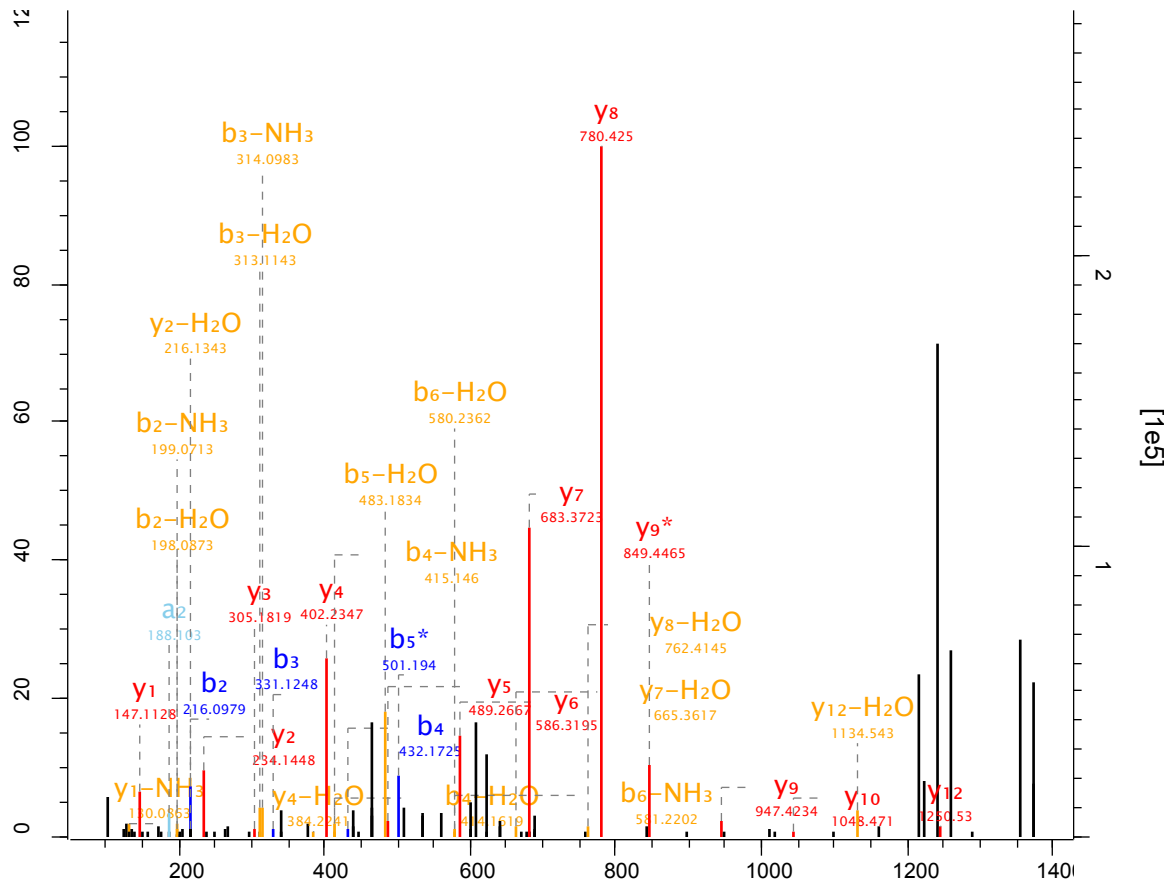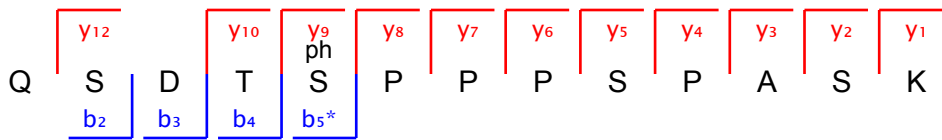

Raw file 201502\_COL14\_38\_45 Scan 4564 Method FTMS; HCD Score 106.35 m/z 723.76

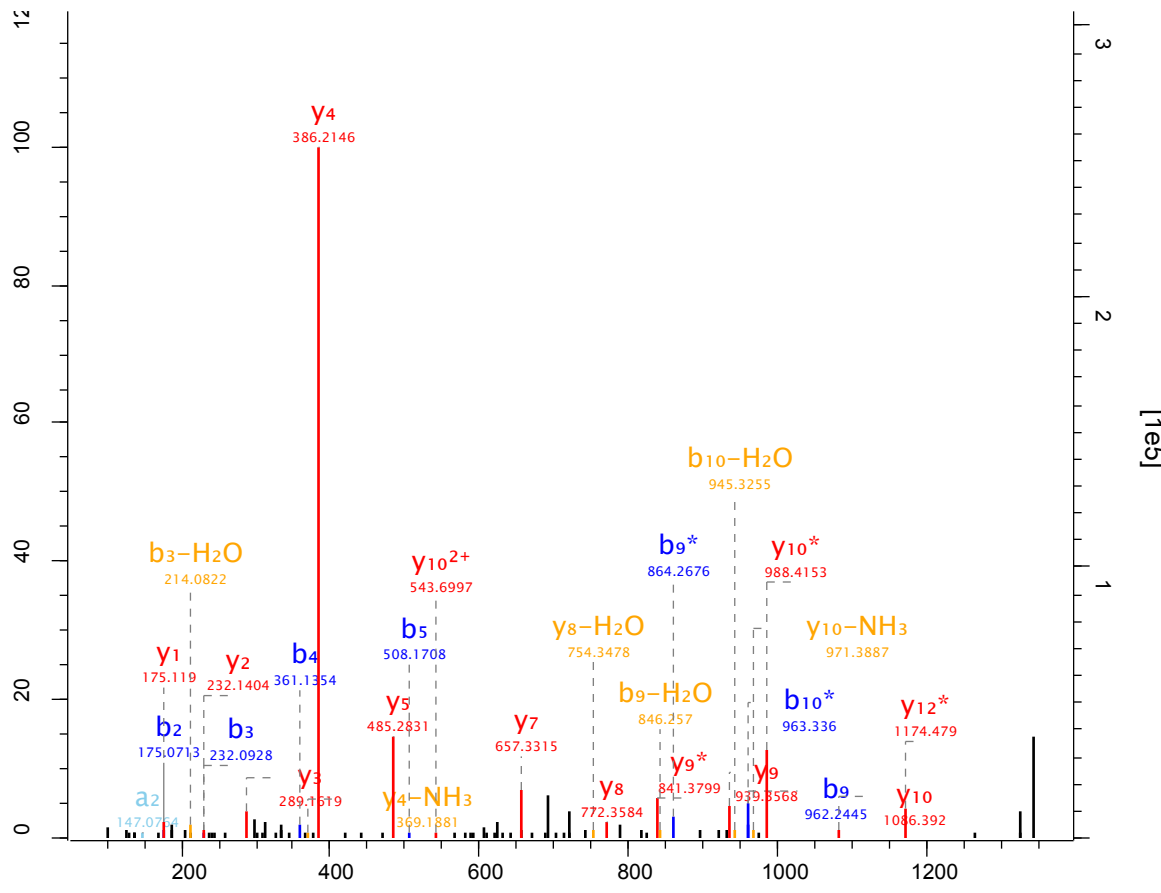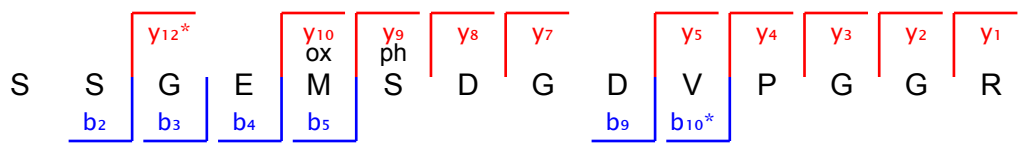

Raw file Scan Method Score m/z  
 201502\_COL14\_38\_45 4590 FTMS; HCD 57.16 574.73

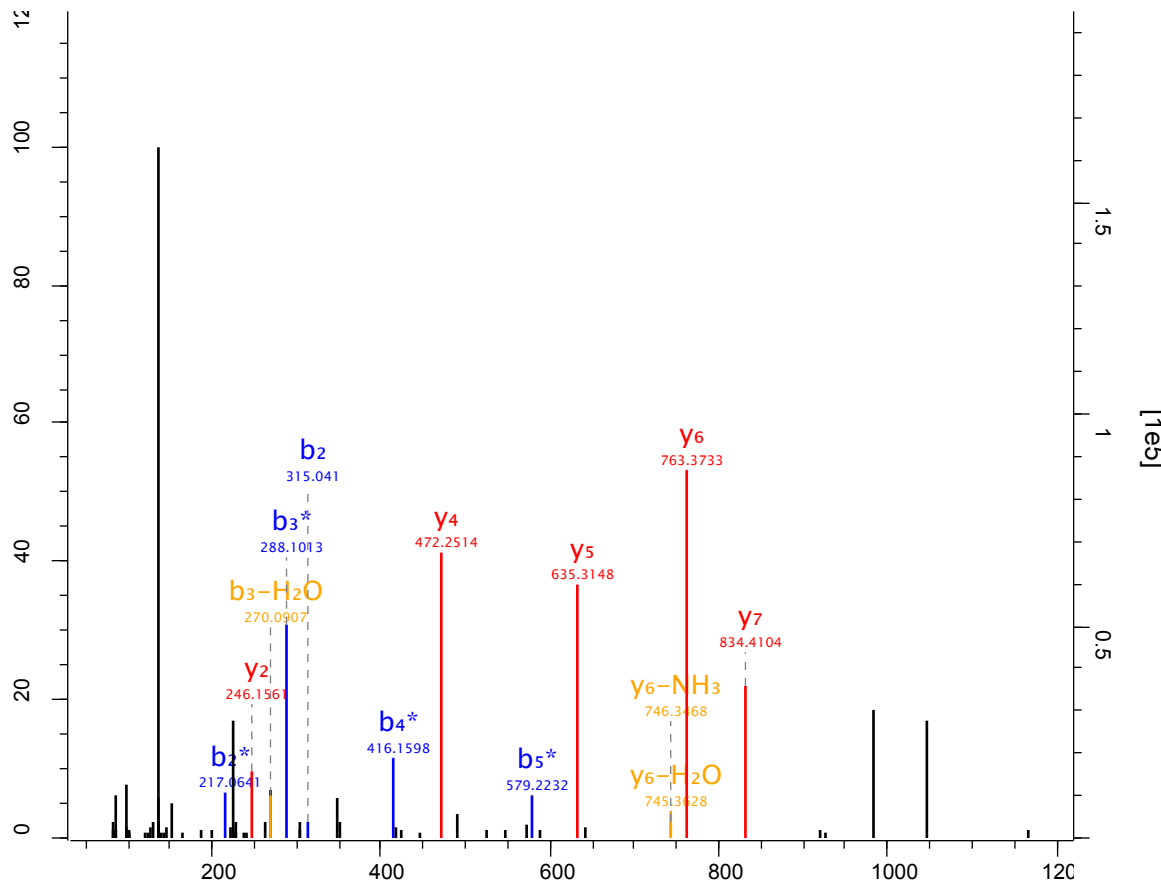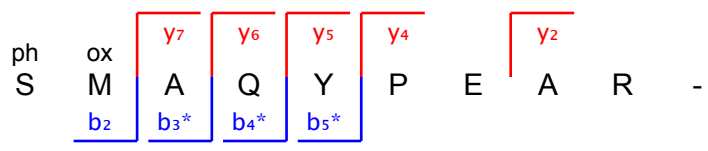

Raw file

Scan Method

Score

m/z

201502\_COL14\_38\_45

4674

FTMS; HCD

43.68

670.32

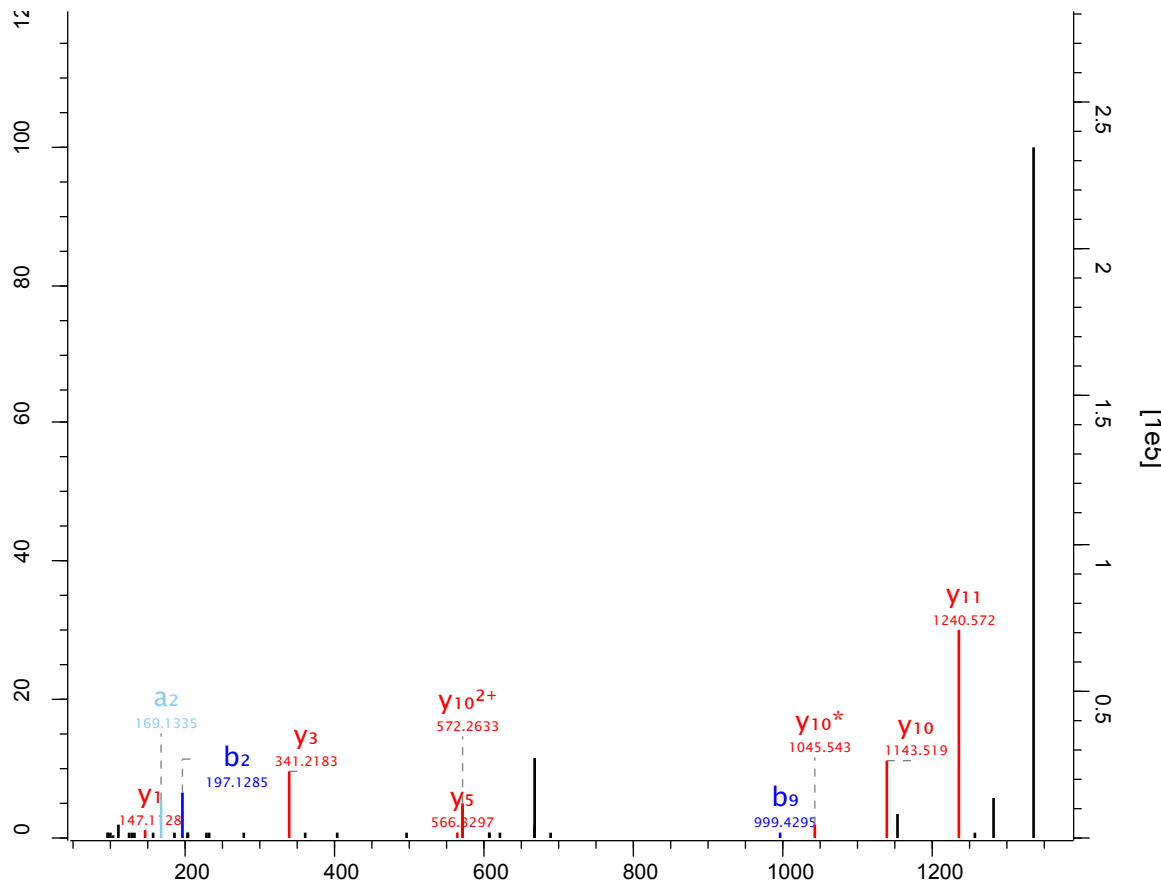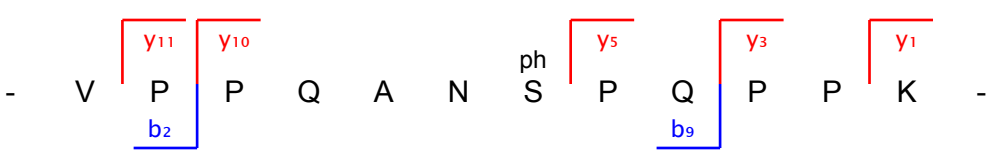

Raw file

Scan Method

Score

m/z

201502\_COL14\_38\_45

4705

FTMS; HCD

103.79

666.76

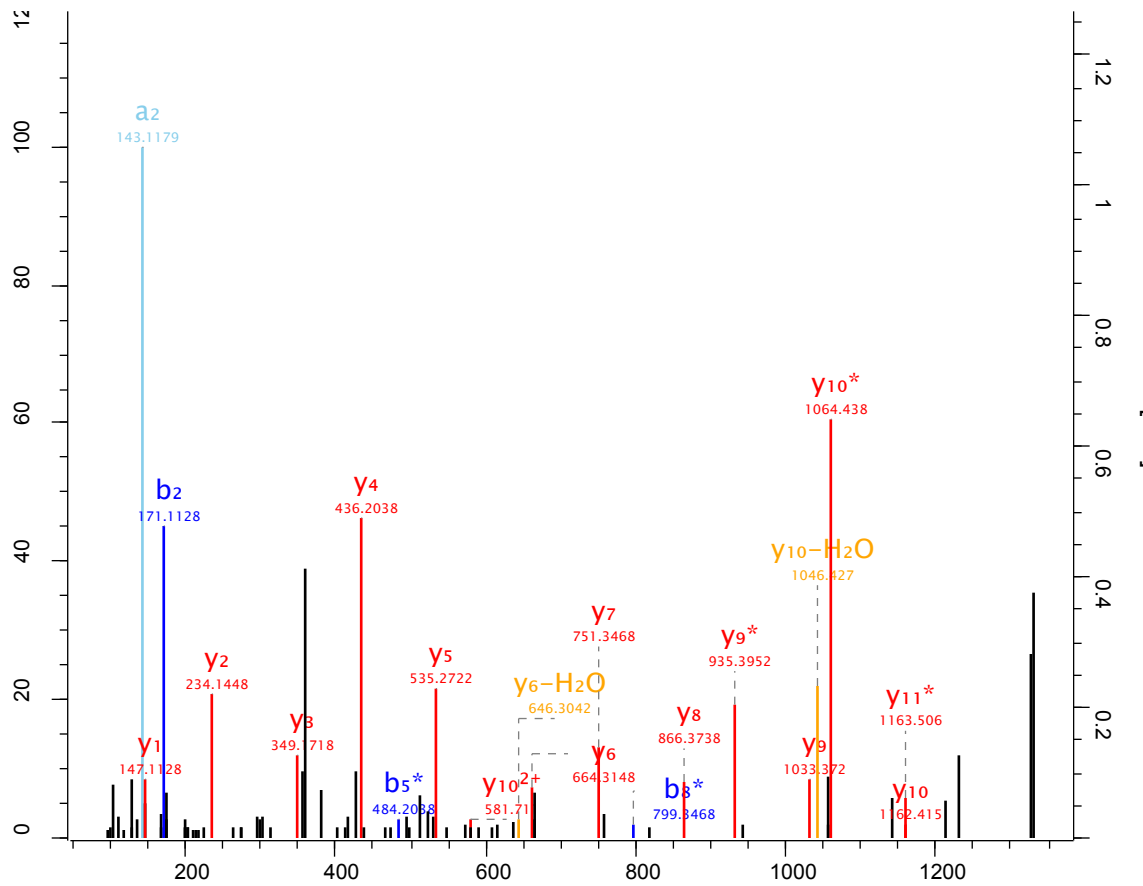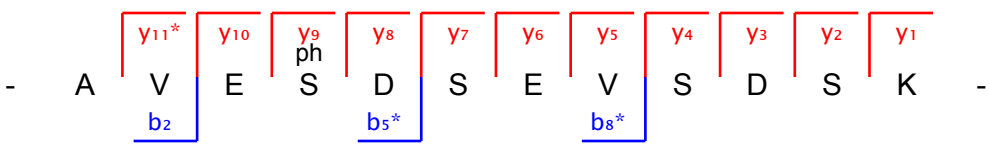



| Raw file           | Scan | Method    | Score | m/z    |
|--------------------|------|-----------|-------|--------|
| 201502_COL14_38_45 | 4839 | FTMS; HCD | 77.06 | 495.21 |

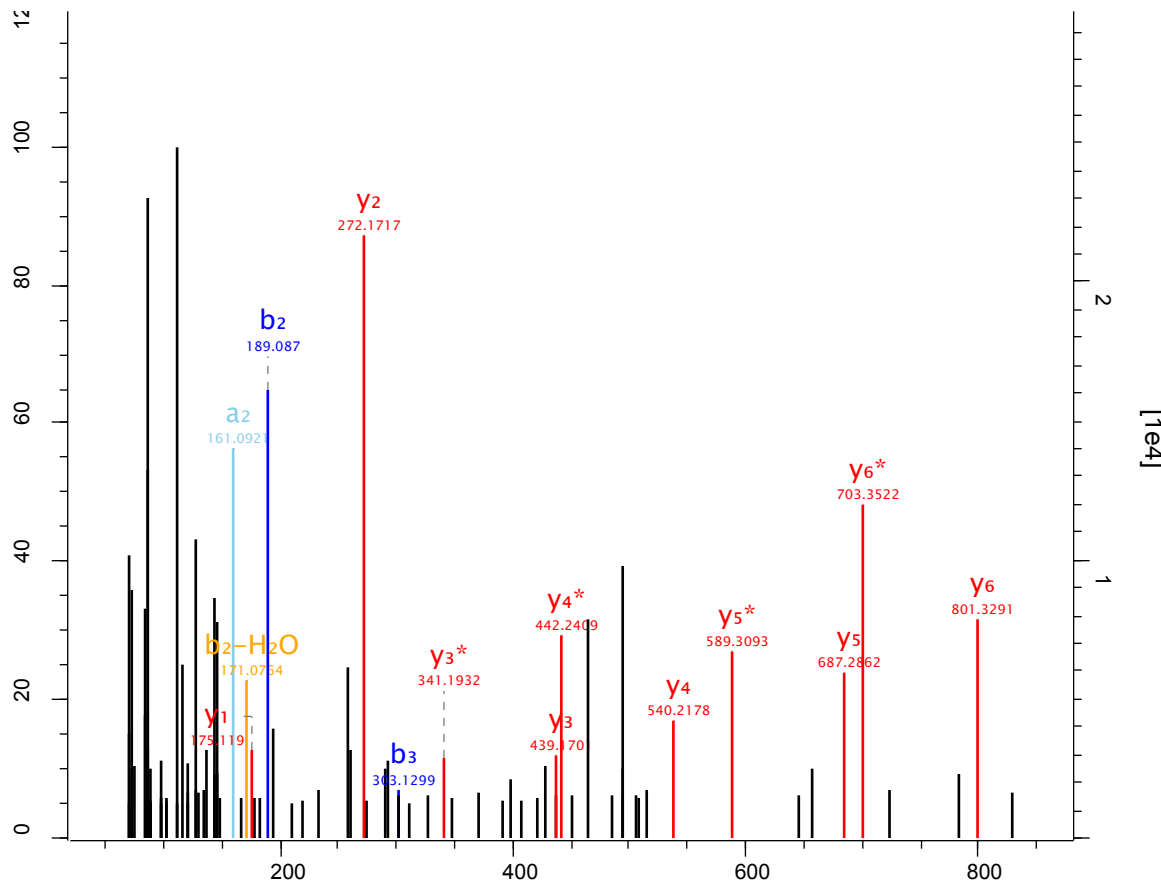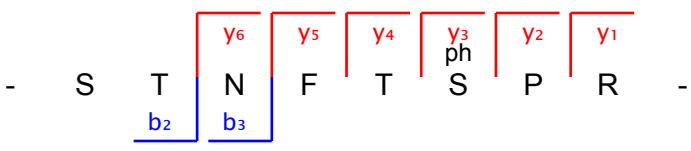

Raw file

Scan

Score

m/z

201502\_COL14\_38\_45

4982

FTMS; HCD

290.29

850.8

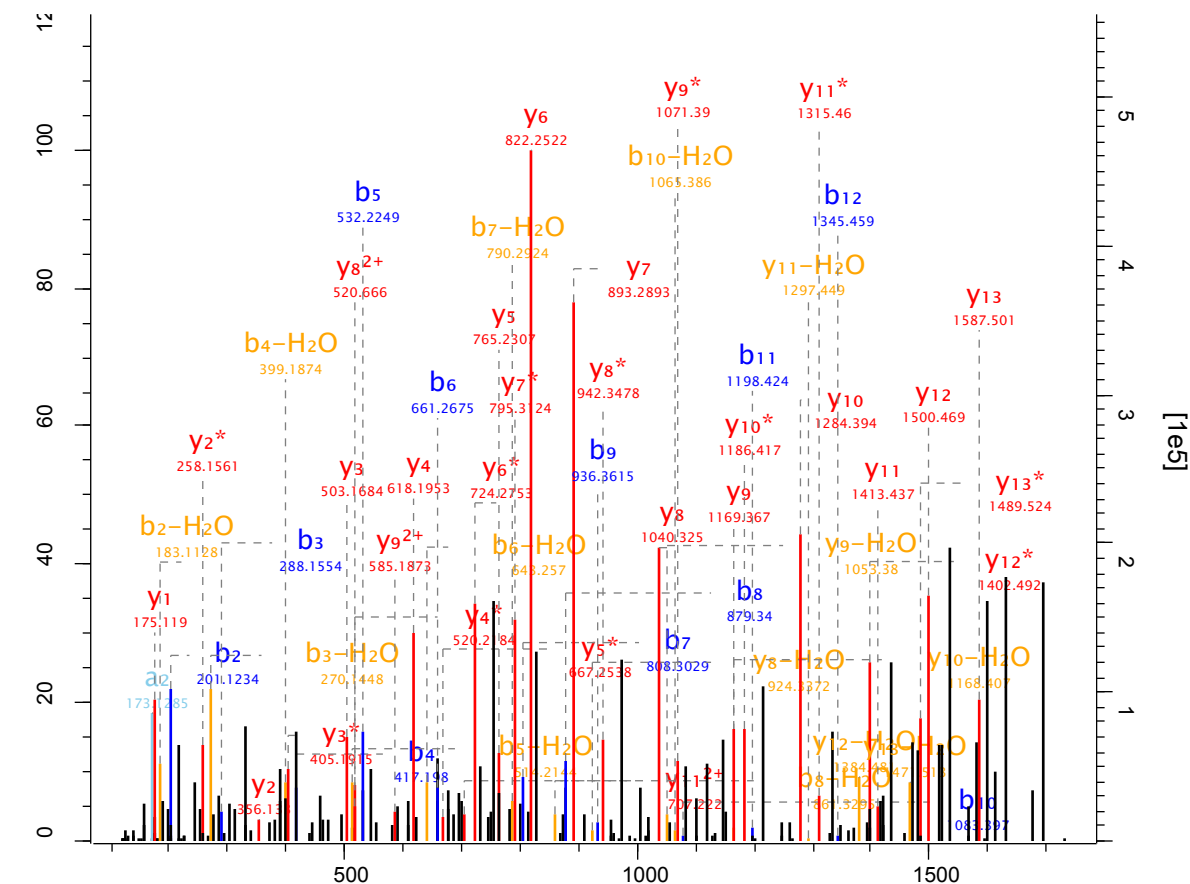

|   |                 |                 |                 |                 |                |                   |                |                |                   |                 |                   |                   |                |
|---|-----------------|-----------------|-----------------|-----------------|----------------|-------------------|----------------|----------------|-------------------|-----------------|-------------------|-------------------|----------------|
|   | y <sub>13</sub> | y <sub>12</sub> | y <sub>11</sub> | y <sub>10</sub> | y <sub>9</sub> | y <sub>8</sub> ox | y <sub>7</sub> | y <sub>6</sub> | y <sub>5</sub> ox | y <sub>4</sub>  | y <sub>3</sub> ox | y <sub>2</sub> ph | y <sub>1</sub> |
| I | S               | S               | E               | D               | E              | M                 | A              | G              | M                 | D               | M                 | T                 | R              |
|   | b <sub>2</sub>  | b <sub>3</sub>  | b <sub>4</sub>  | b <sub>5</sub>  | b <sub>6</sub> | b <sub>7</sub>    | b <sub>8</sub> | b <sub>9</sub> | b <sub>10</sub>   | b <sub>11</sub> | b <sub>12</sub>   |                   |                |

| Raw file           | Scan | Method    | Score | m/z    |
|--------------------|------|-----------|-------|--------|
| 201502_COL14_38_45 | 5268 | FTMS; HCD | 52.58 | 564.74 |

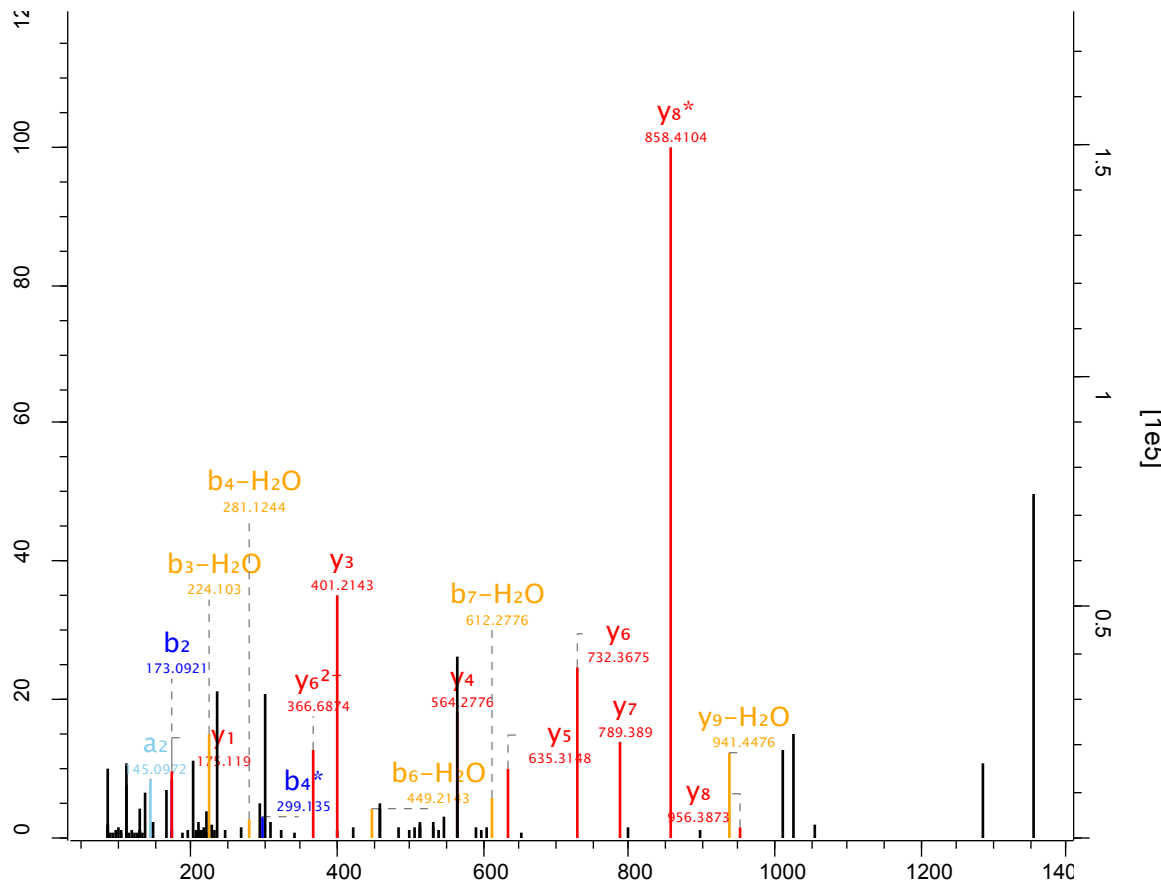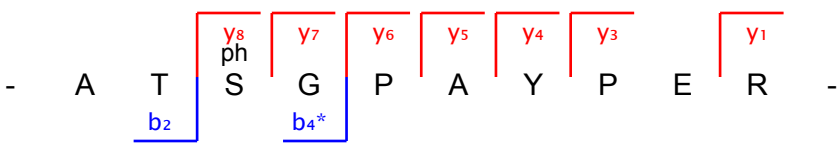

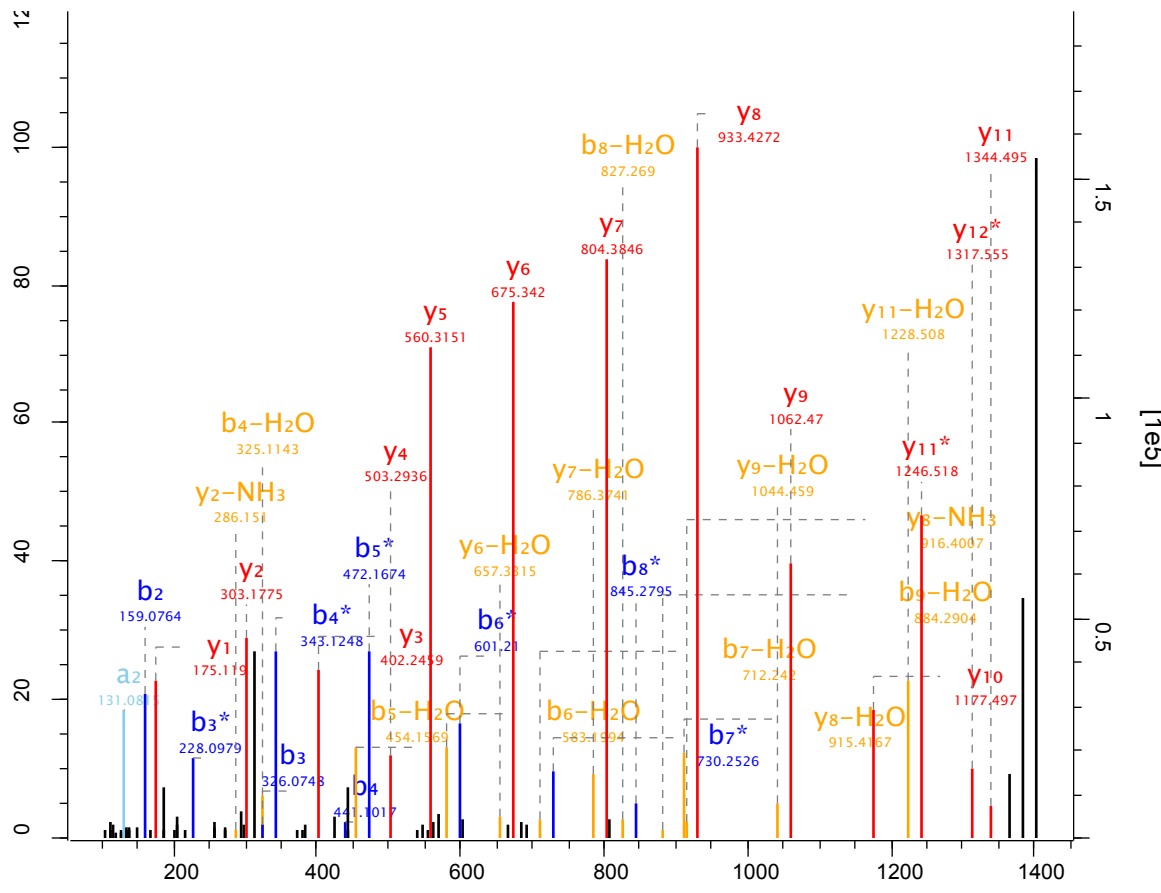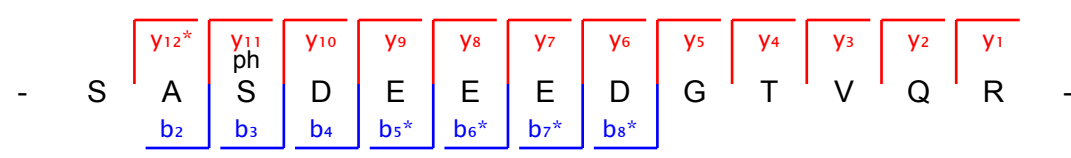

| Raw file           | Scan | Method    | Score | m/z    |
|--------------------|------|-----------|-------|--------|
| 201502_COL14_38_45 | 5493 | FTMS; HCD | 46.88 | 630.24 |

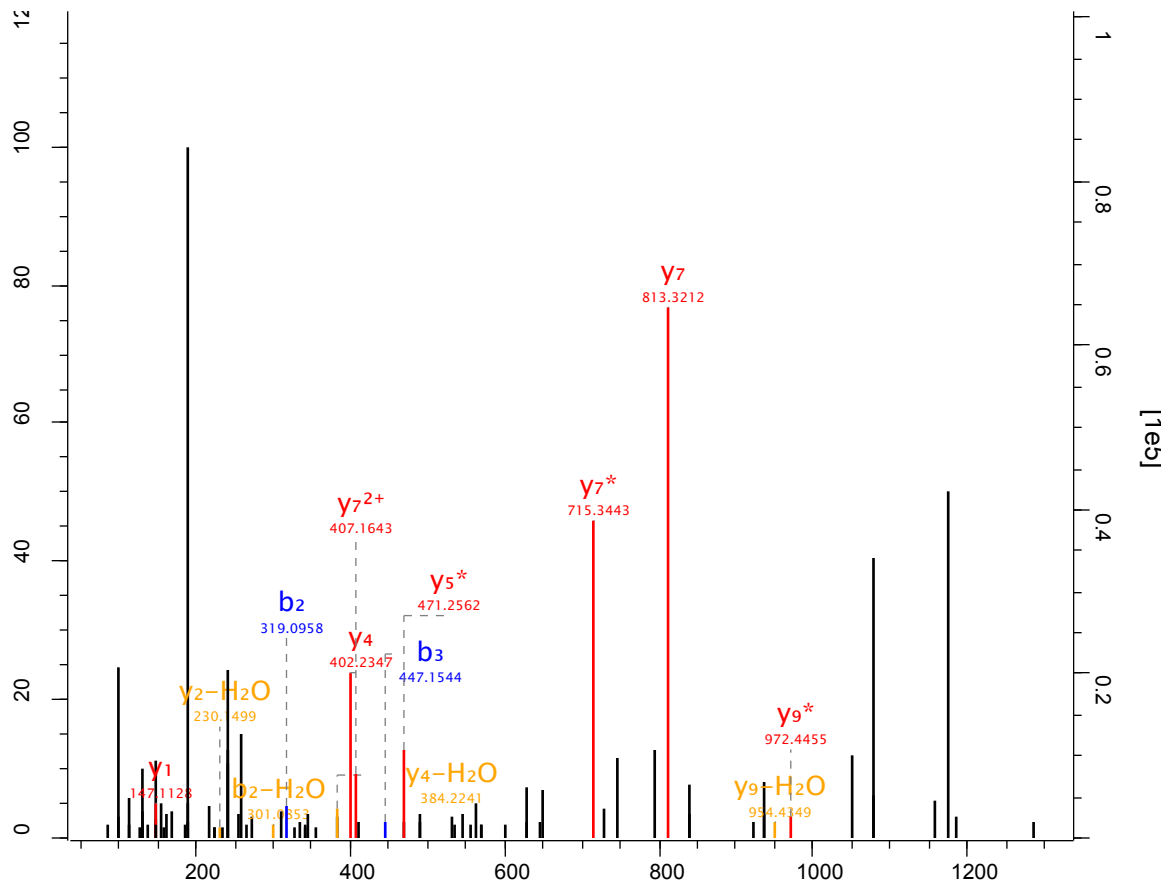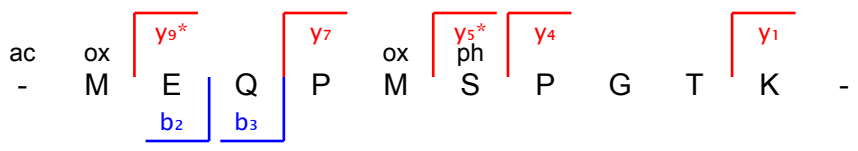

Raw file 201502\_COL14\_38\_45 Scan 6473 Method FTMS; HCD Score 50.9 m/z 678.78

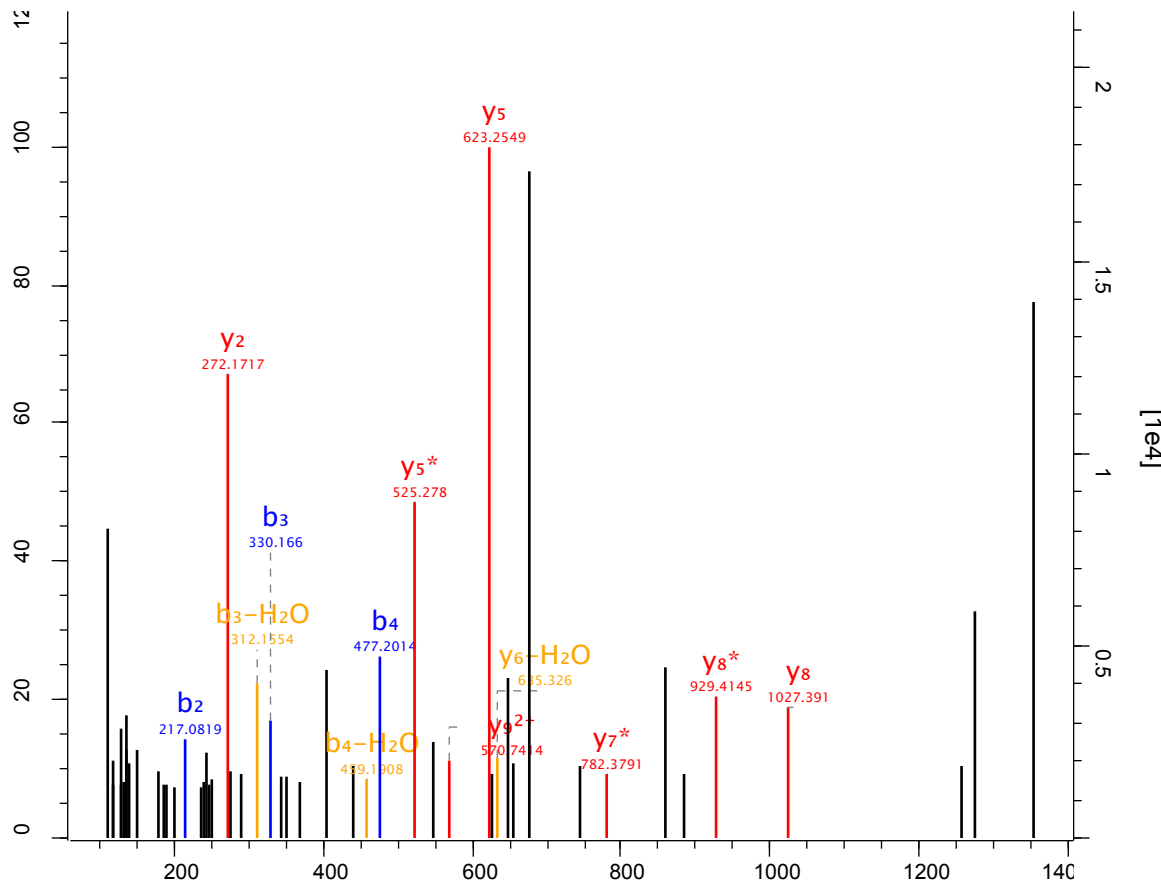

- D T I M E Q P S S P R -

Fragmentation labels: b2, b3, b4, y9<sup>2+</sup>, y8<sup>OX</sup>, y7\*, y5, y2

Raw file

Scan Method

Score

m/z

201502\_COL14\_38\_45

6516

FTMS; HCD

159.94

536.24

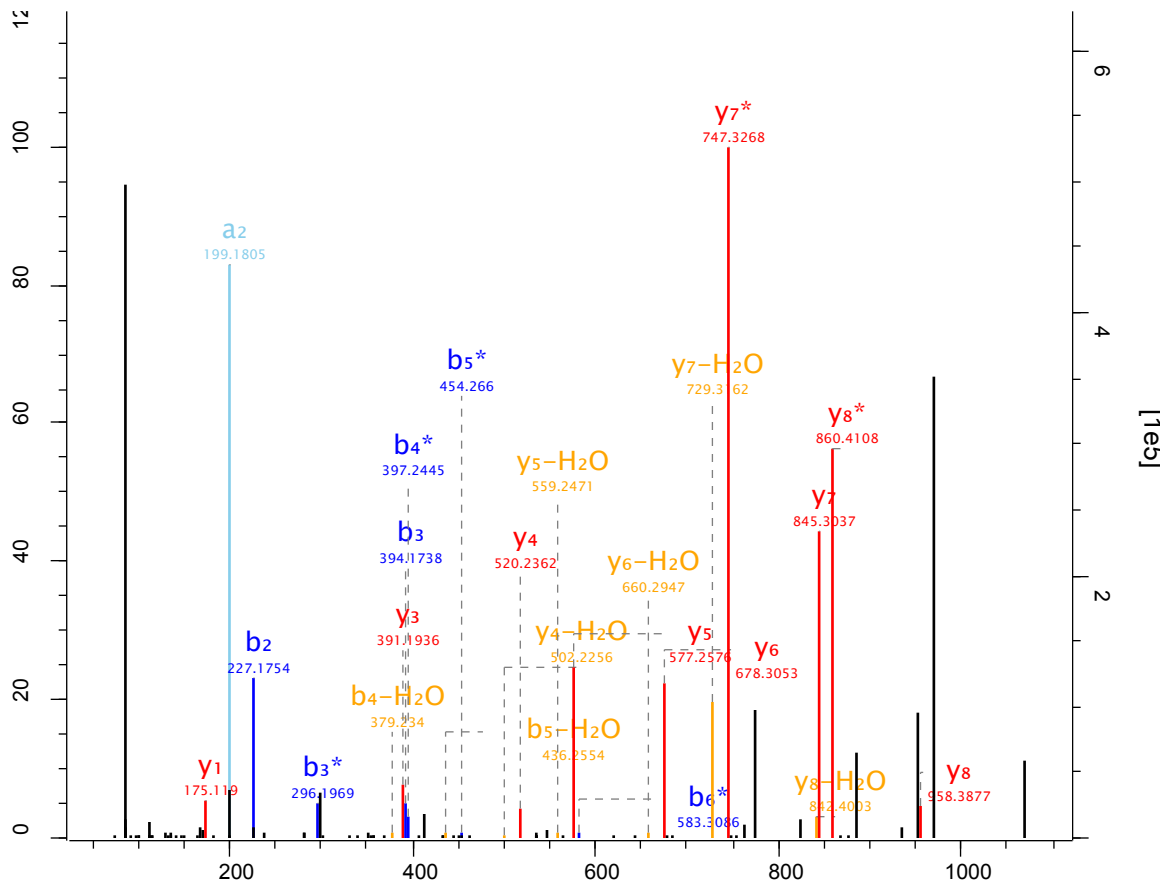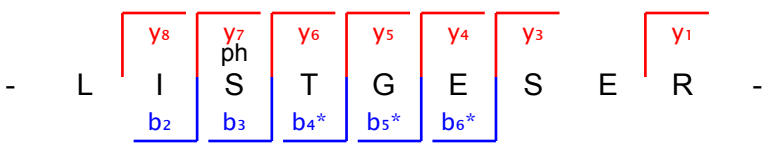

Raw file Scan Method Score m/z  
 201502\_COL14\_38\_45 6598 FTMS; HCD 63.07 488.19

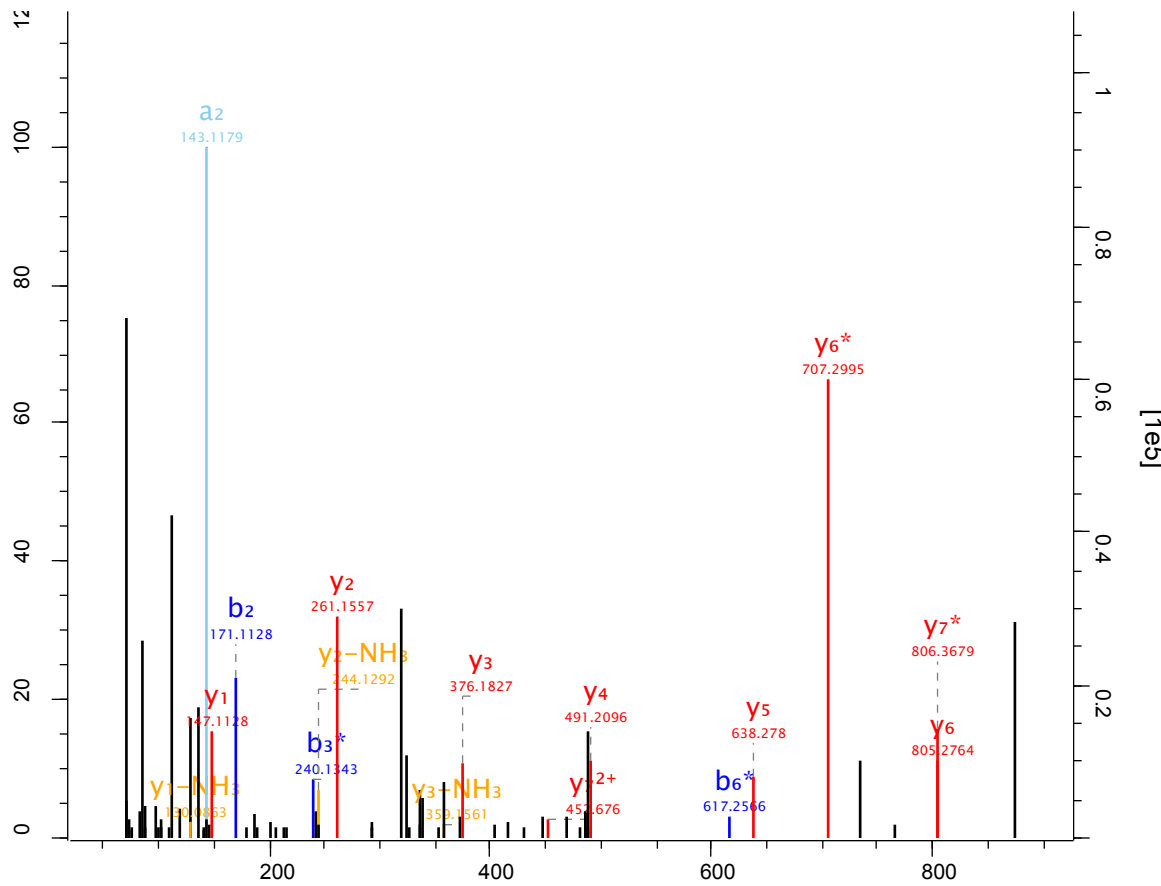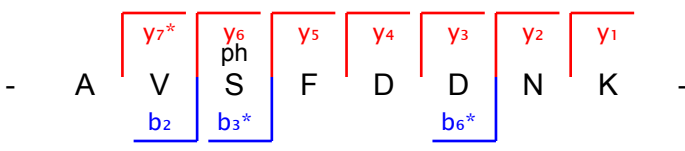



Raw file Scan Method Score m/z  
 201502\_COL14\_38\_45 6885 FTMS; HCD 84.48 588.74

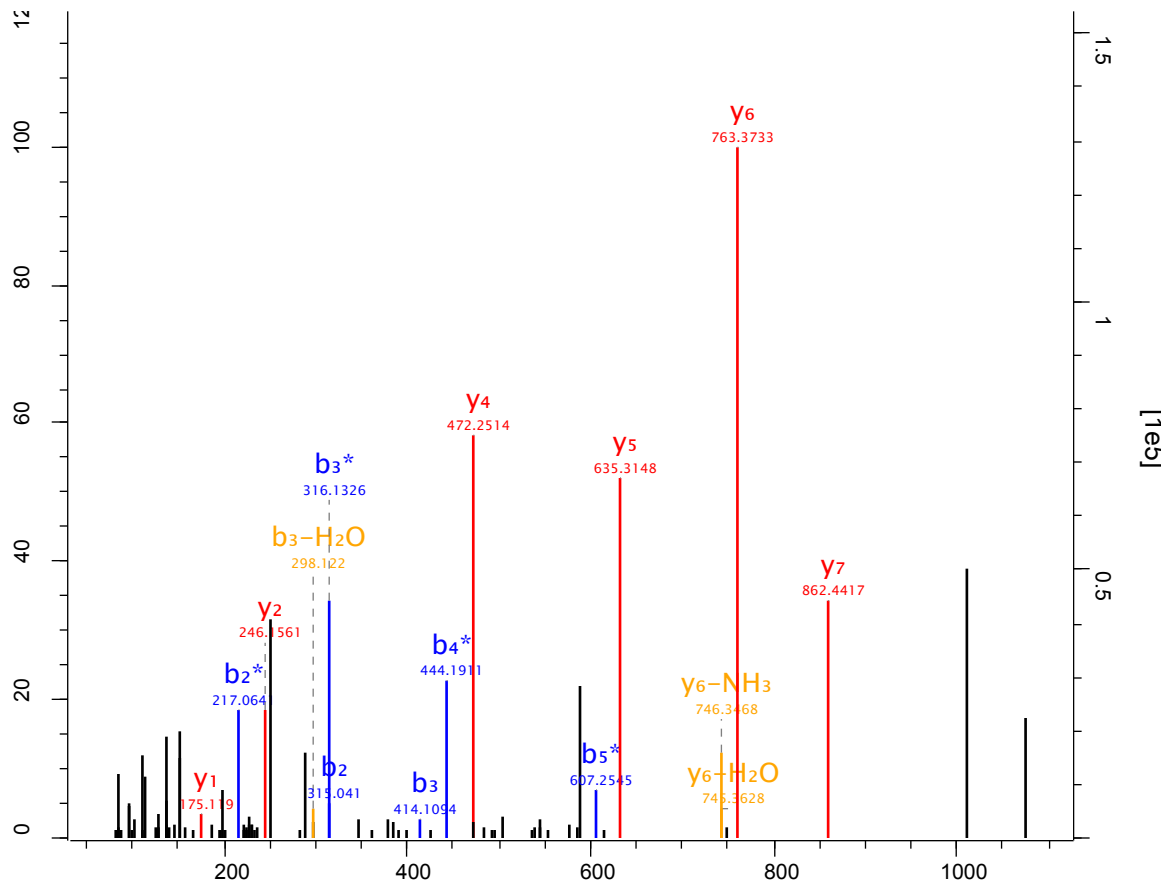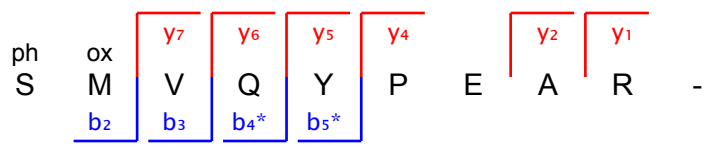



Raw file Scan Method Score m/z  
 201502\_COL14\_38\_45 7193 FTMS; HCD 89.86 872.36

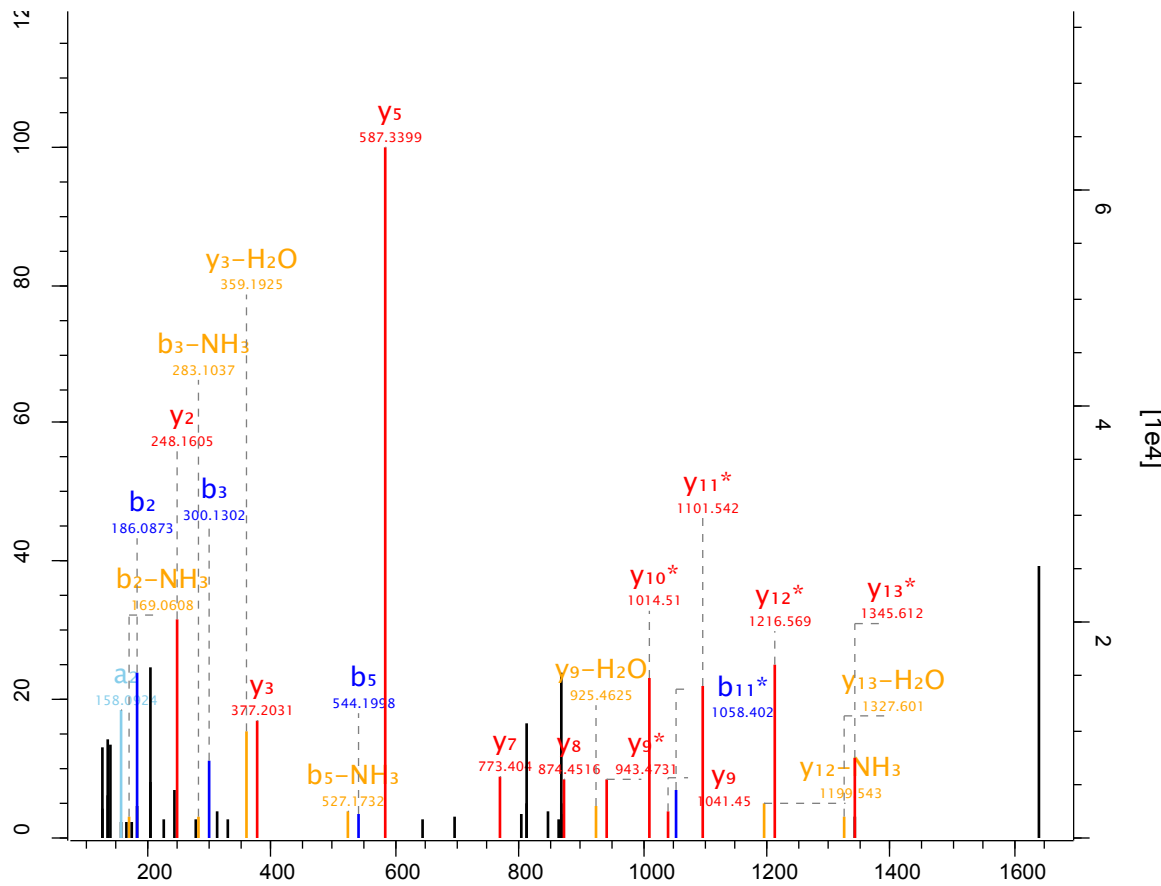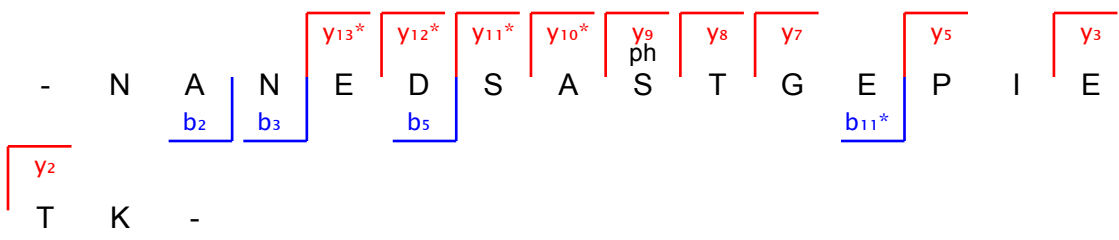

Raw file Scan Method Score m/z  
 201502\_COL14\_38\_45 7328 FTMS; HCD 64.83 563.25

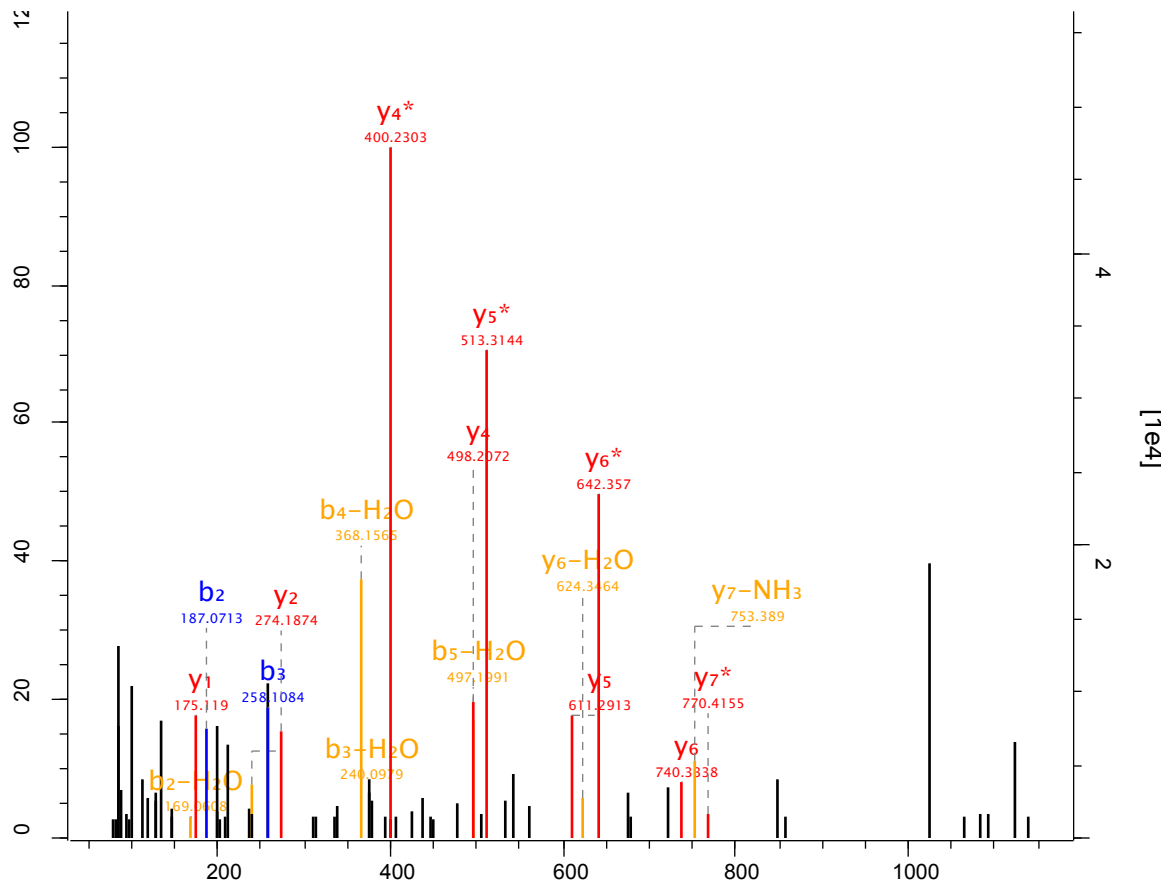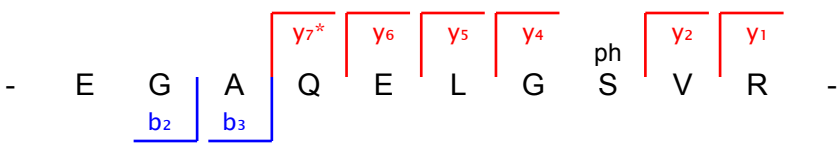

Raw file Scan Method Score m/z  
 201502\_COL14\_38\_45 7398 FTMS; HCD 73.72 622.8

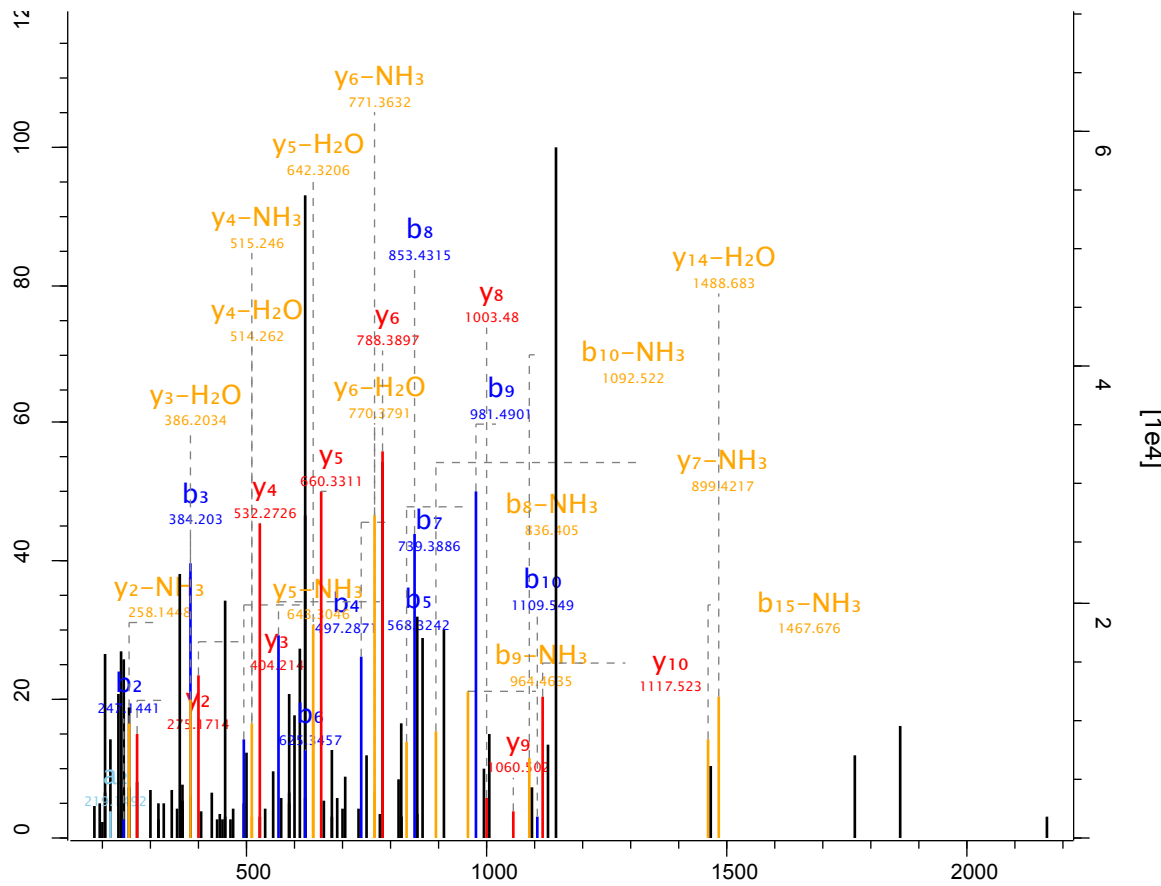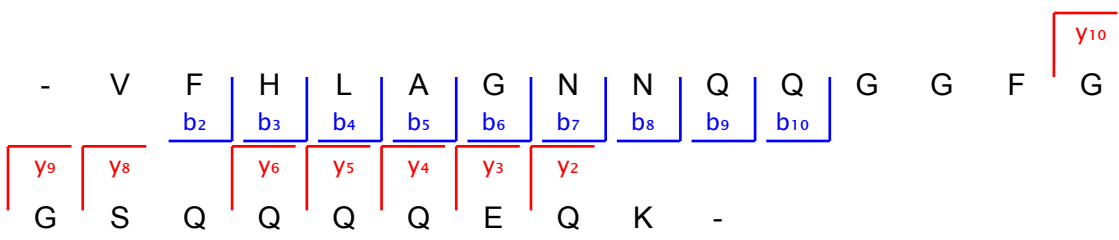

Raw file Scan Method Score m/z  
 201502\_COL14\_38\_45 8171 FTMS; HCD 41.62 646.25

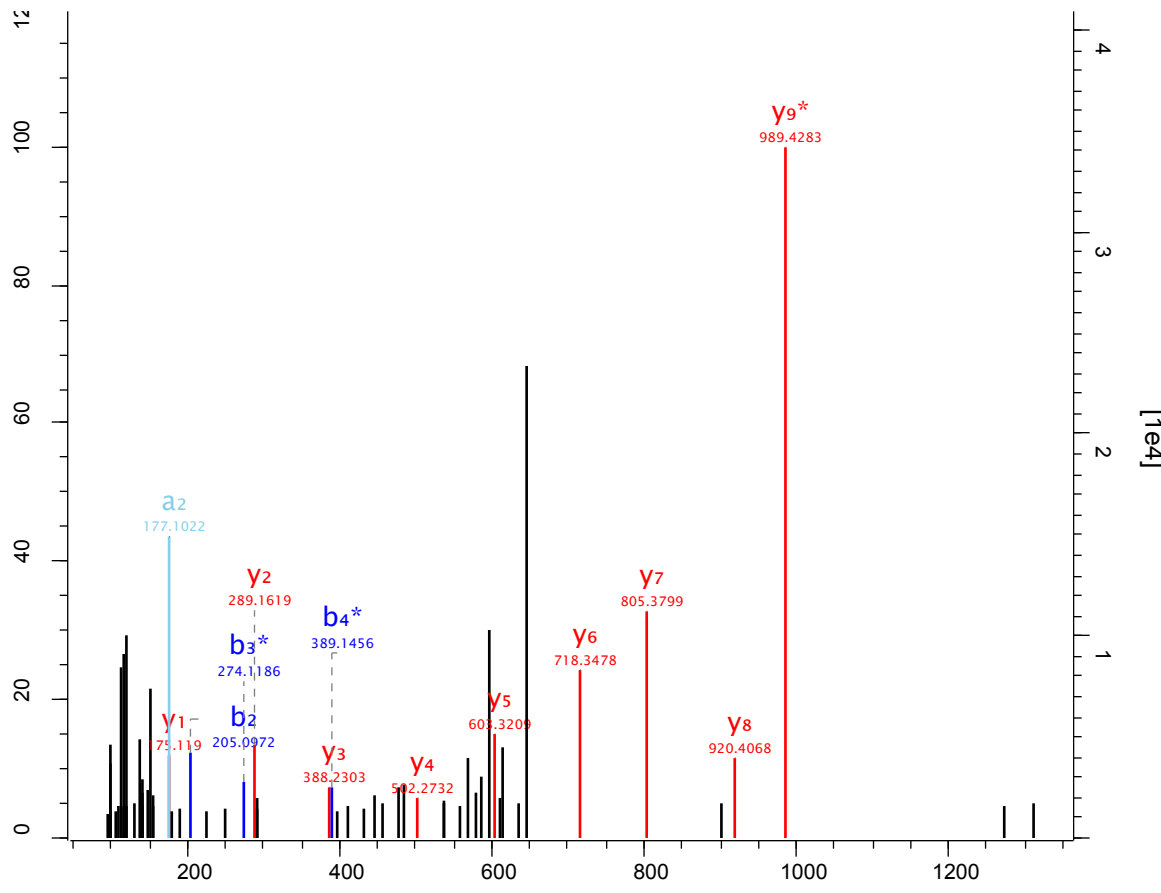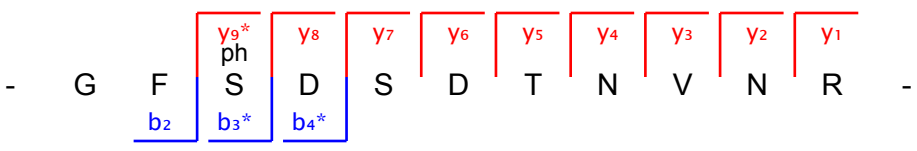

Raw file Scan Method Score m/z  
 201502\_COL14\_38\_45 8172 FTMS; HCD 44.39 520.89

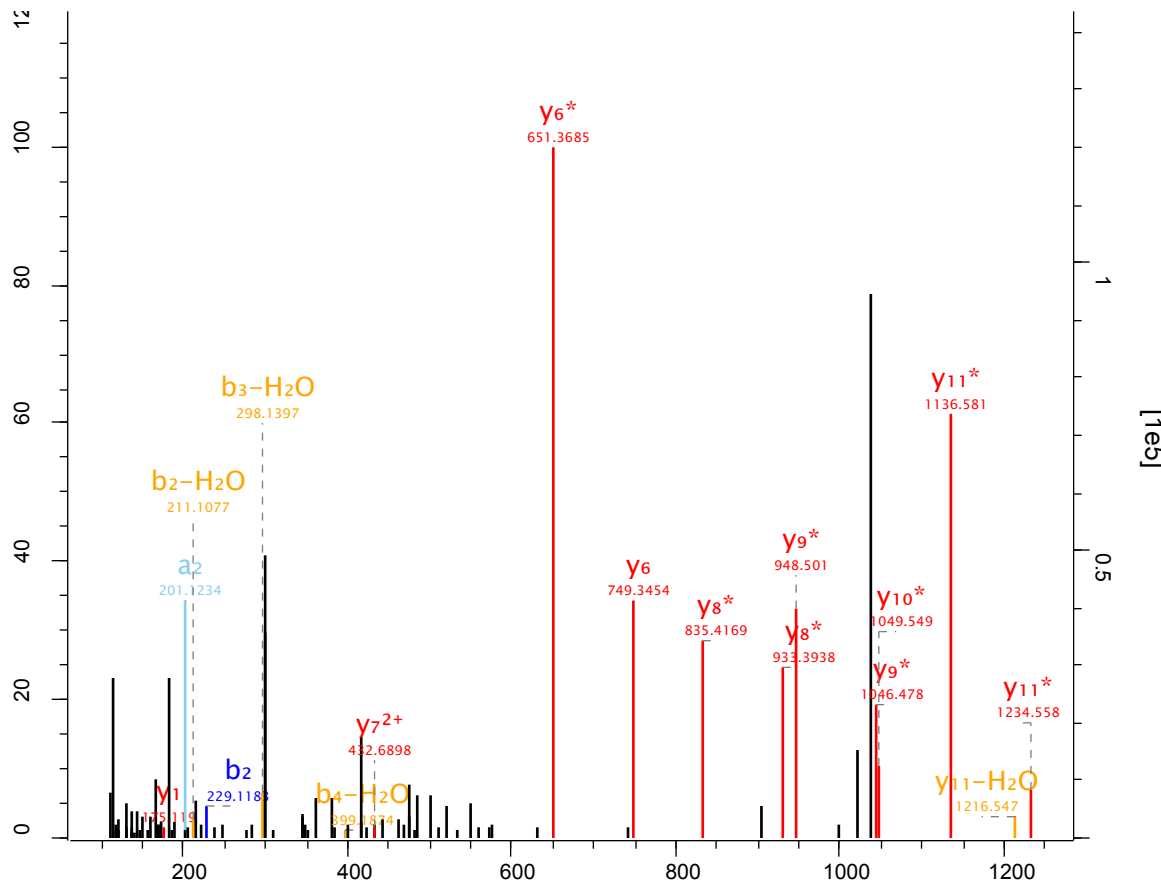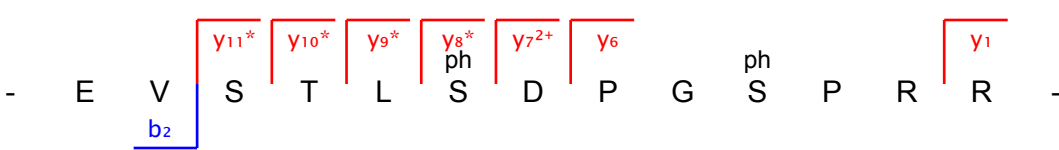

| Raw file           | Scan | Method    | Score | m/z    |
|--------------------|------|-----------|-------|--------|
| 201502_COL14_38_45 | 8317 | FTMS; HCD | 41.7  | 485.22 |

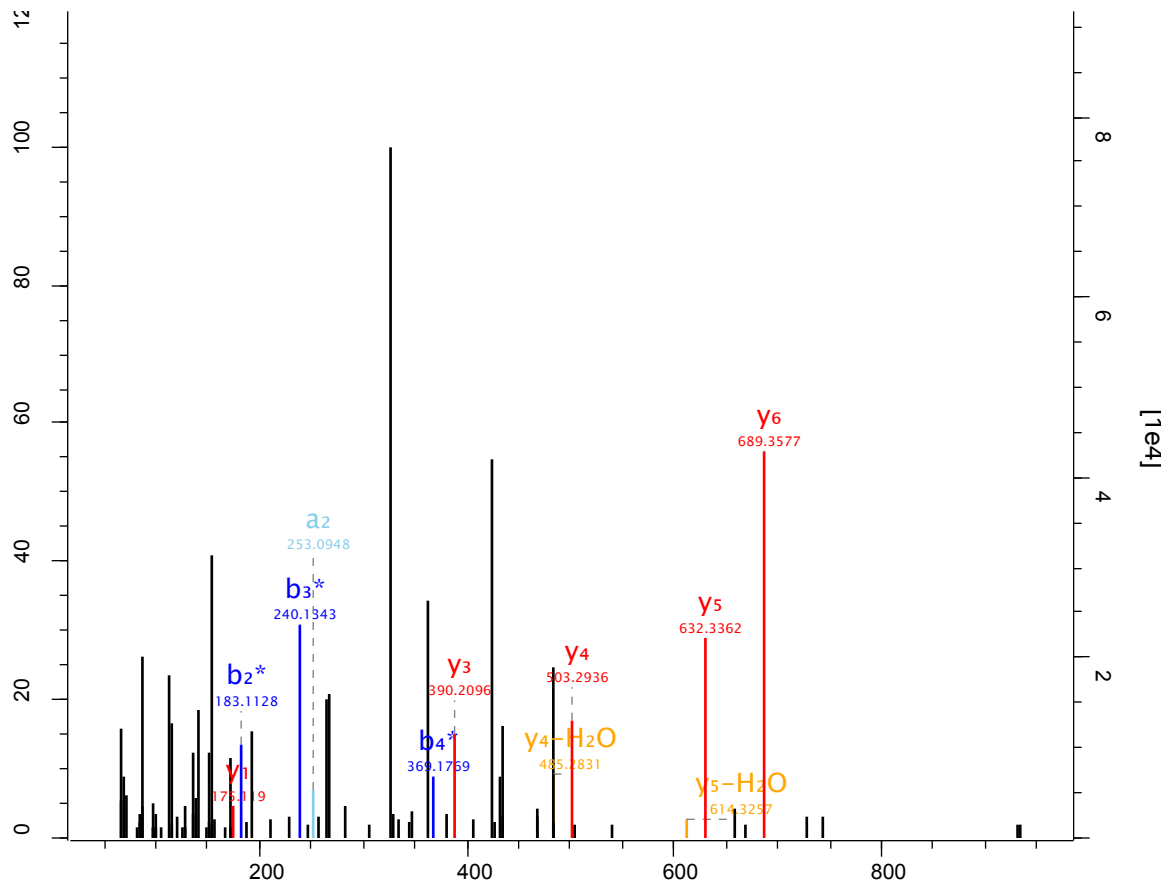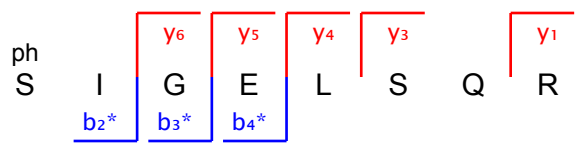



Raw file 201502\_COL14\_38\_45 Scan 8428 Method FTMS; HCD Score 113.86 m/z 827.29

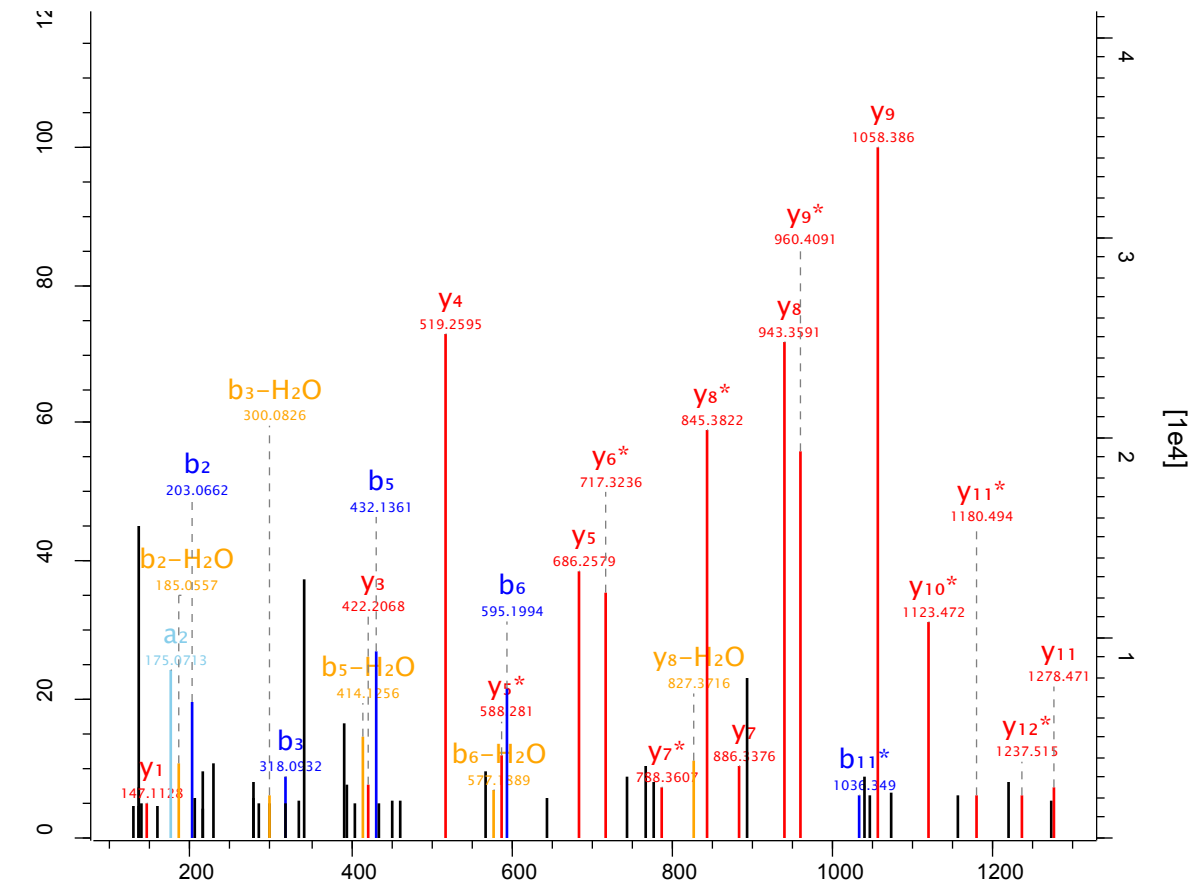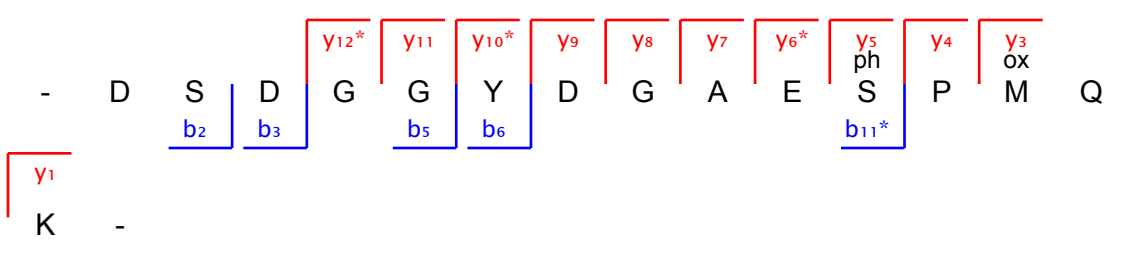

Raw file Scan Method Score m/z  
 201502\_COL14\_38\_45 8483 FTMS; HCD 101.05 799.84

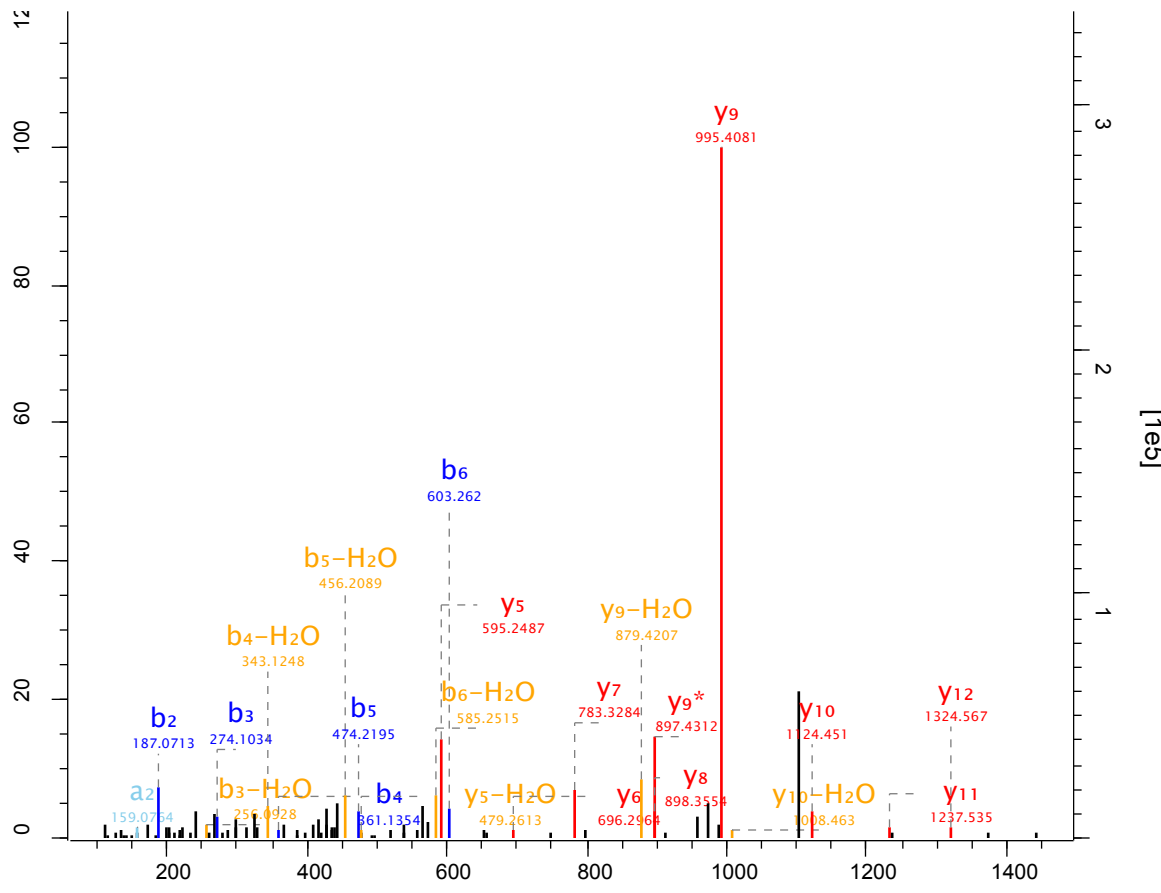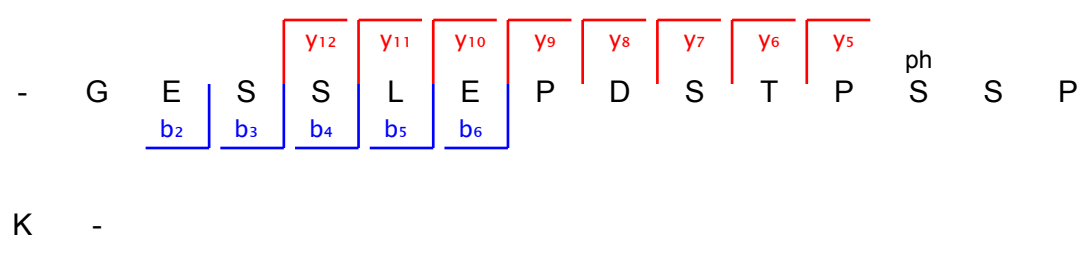

K -

Raw file Scan Method Score m/z  
 201502\_COL14\_38\_45 8972 FTMS; HCD 44.54 529.59

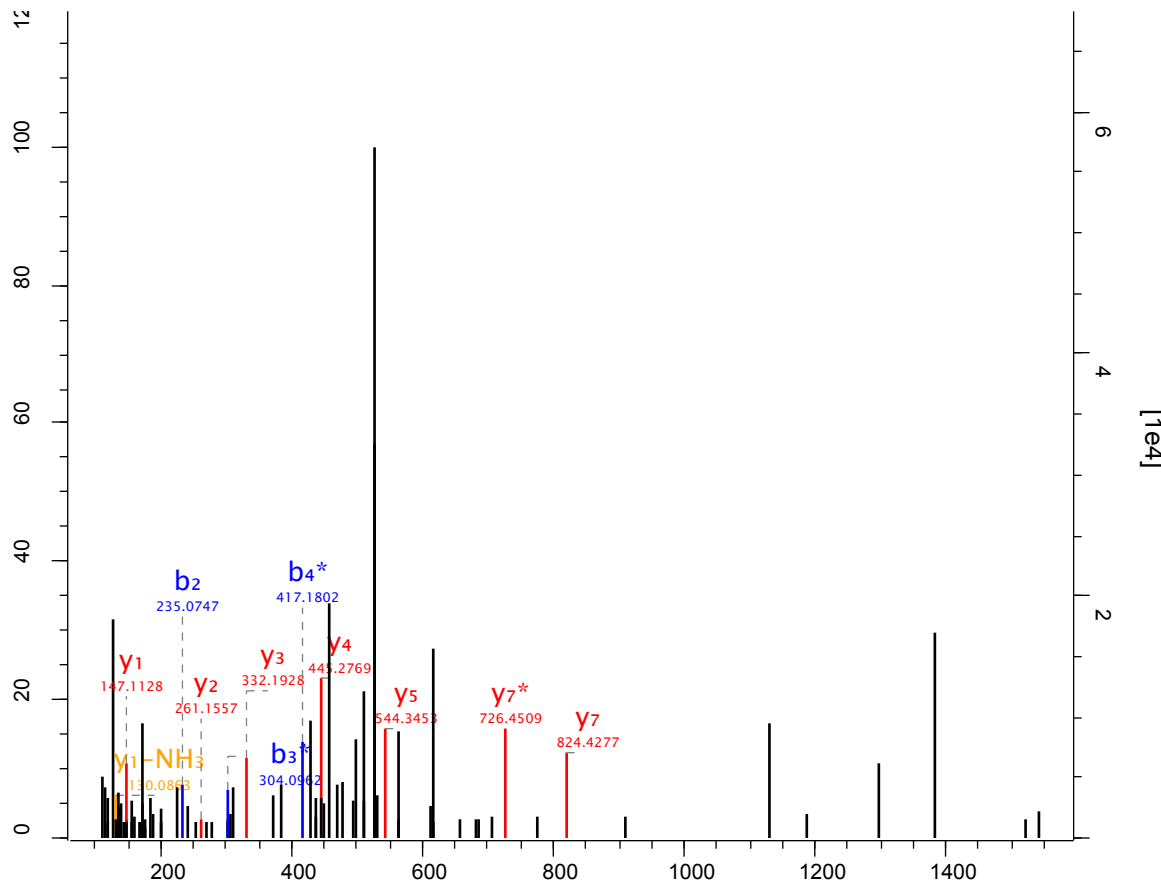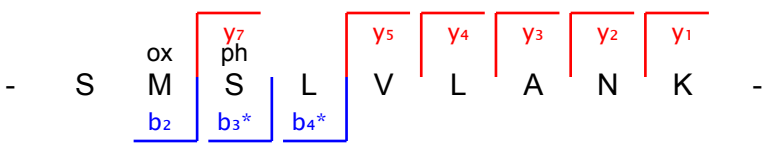

Raw file Scan Method Score m/z  
 201502\_COL14\_38\_45 9051 FTMS; HCD 78.08 551.23

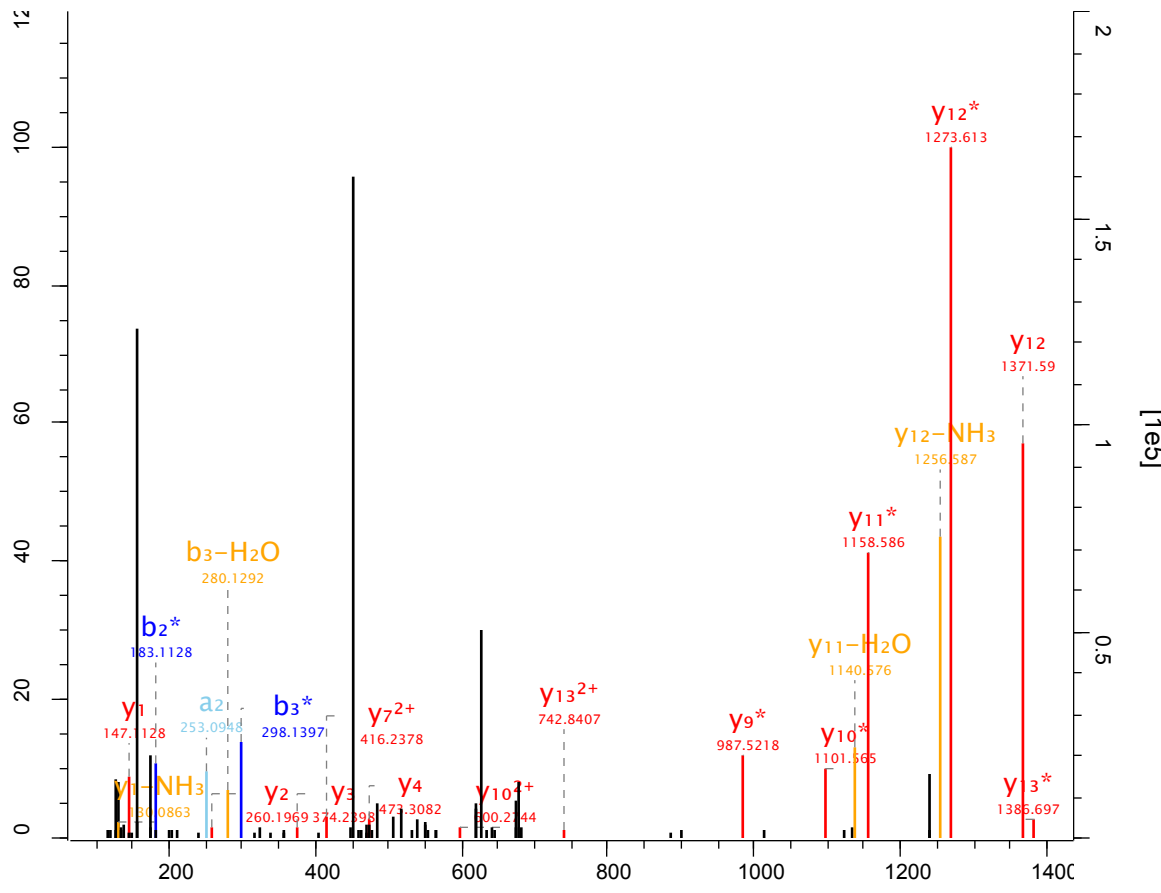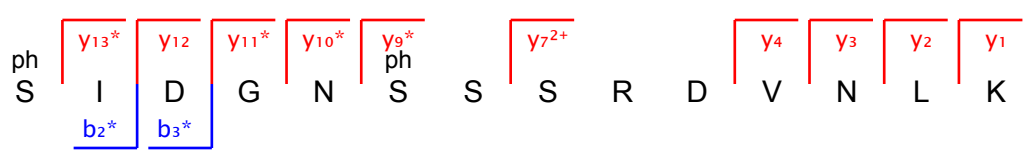



Raw file Scan Method Score m/z  
 201503\_COL14\_18\_25 19496 FTMS; HCD 105.99 637.77

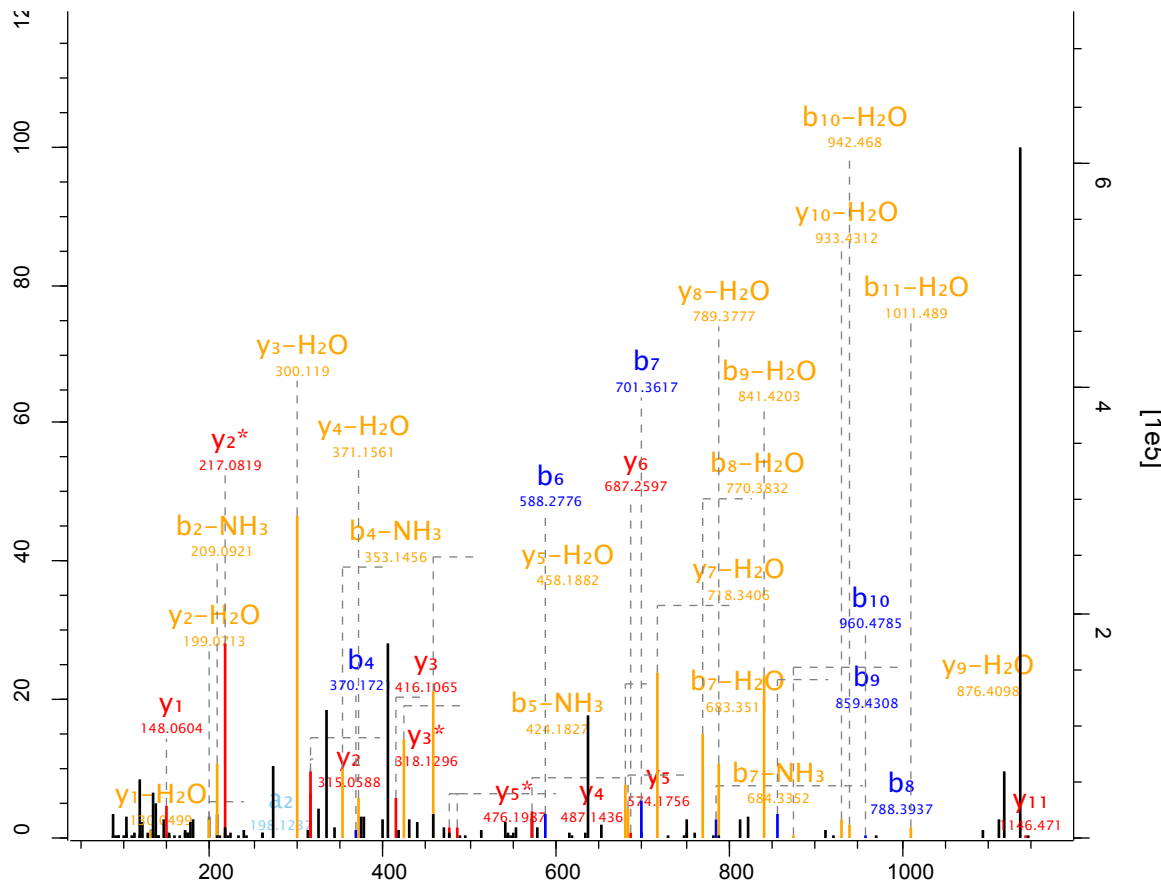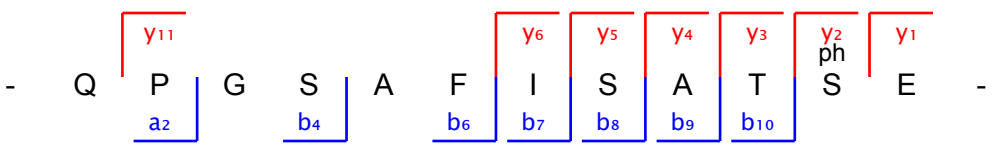

| Raw file           | Scan | Method    | Score | m/z    |
|--------------------|------|-----------|-------|--------|
| 201503_COL14_18_25 | 2975 | FTMS; HCD | 53.45 | 439.53 |

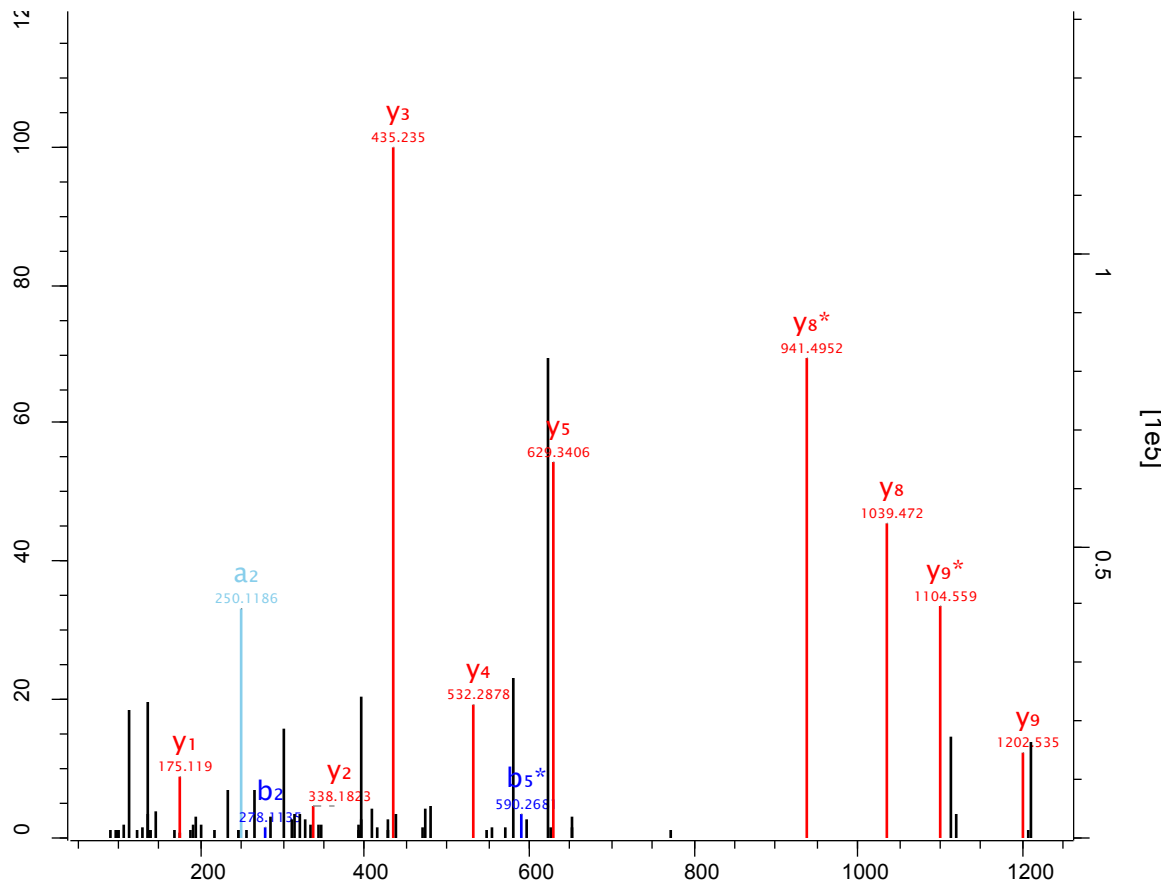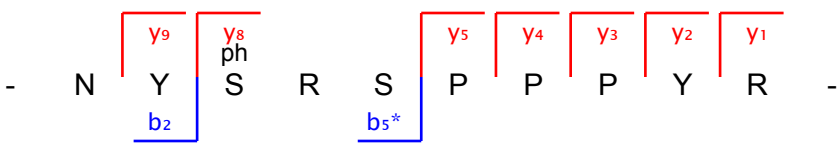

Raw file

Scan Method

Score

m/z

201503\_COL14\_18\_25

3073

FTMS; HCD

46.88

430.53

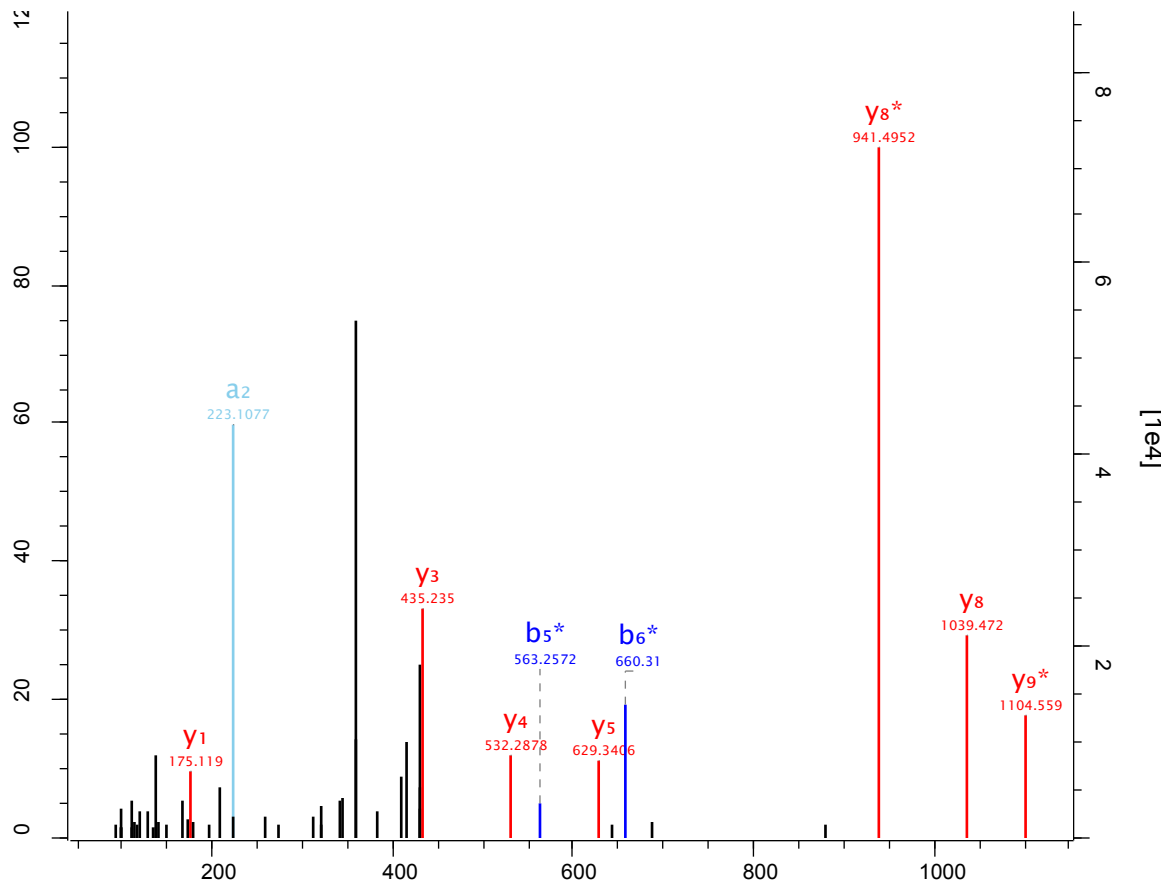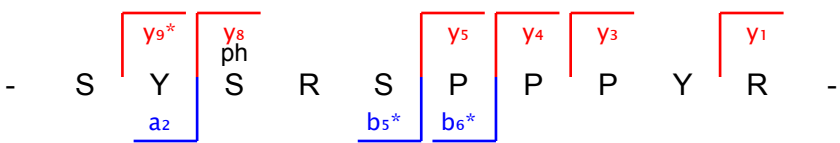



Raw file 201503\_COL14\_18\_25 Scan 33316 Method FTMS; HCD Score 49.27 m/z 781.33

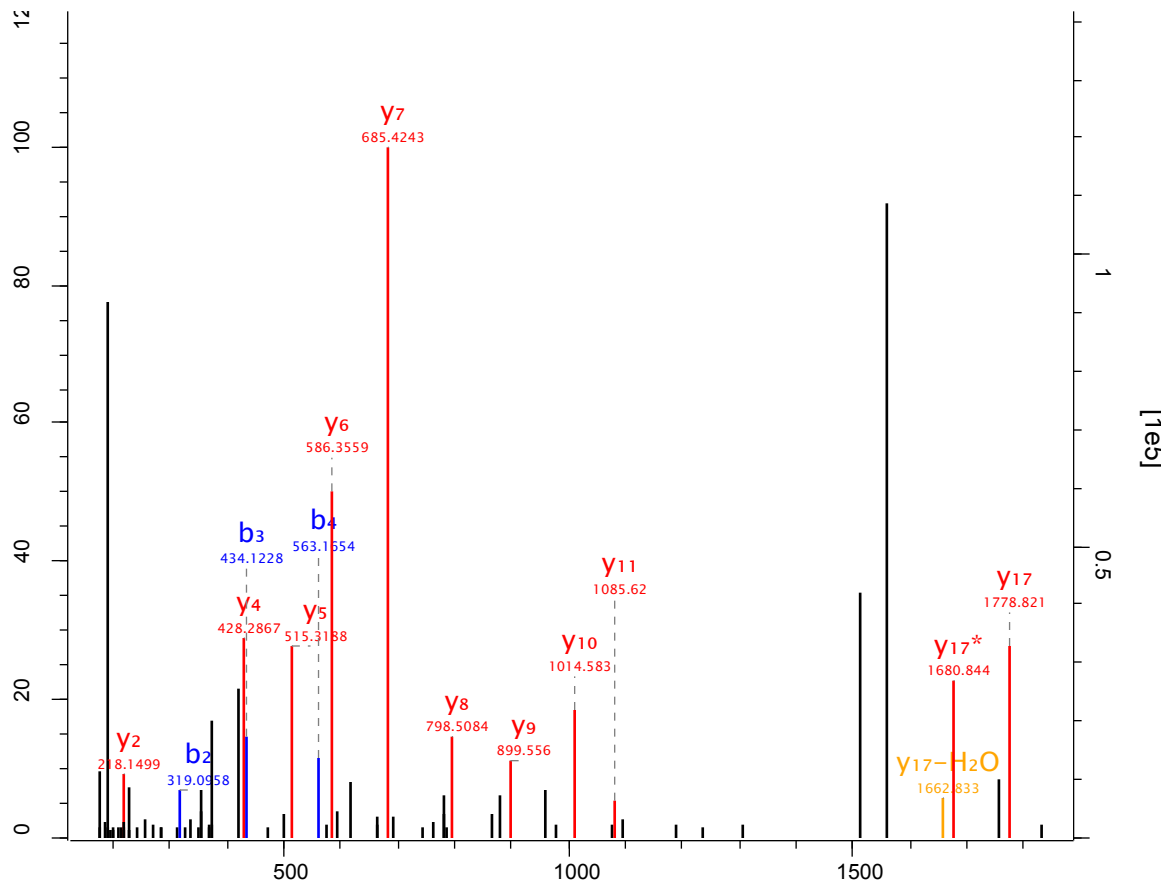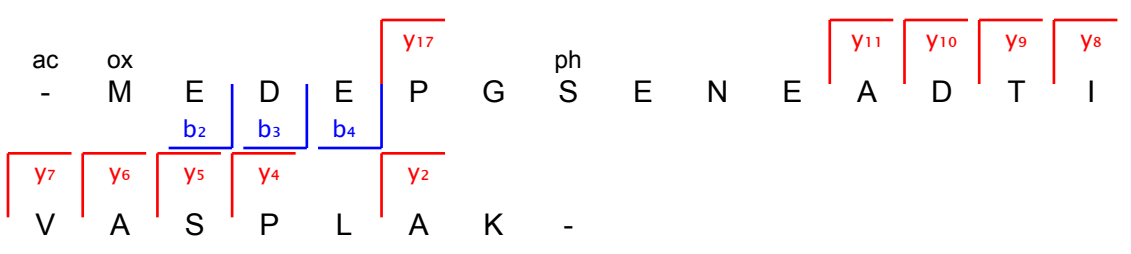

| Raw file           | Scan | Method    | Score | m/z    |
|--------------------|------|-----------|-------|--------|
| 201503_COL14_18_25 | 3589 | FTMS; HCD | 58.17 | 578.74 |

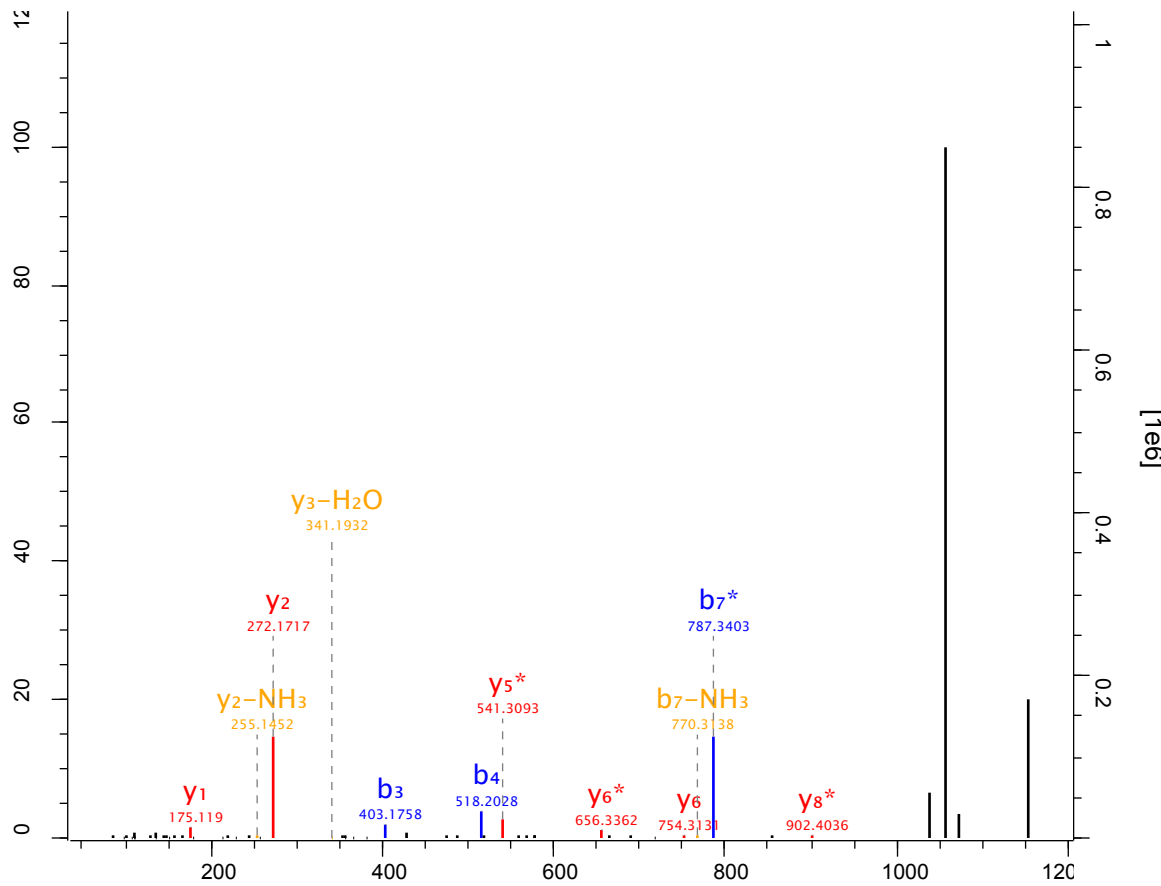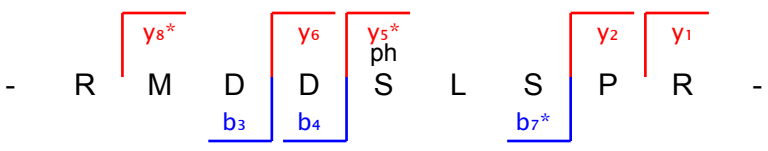

Raw file Scan Method Score m/z  
 201503\_COL14\_18\_25 4184 FTMS; HCD 141.22 475.91

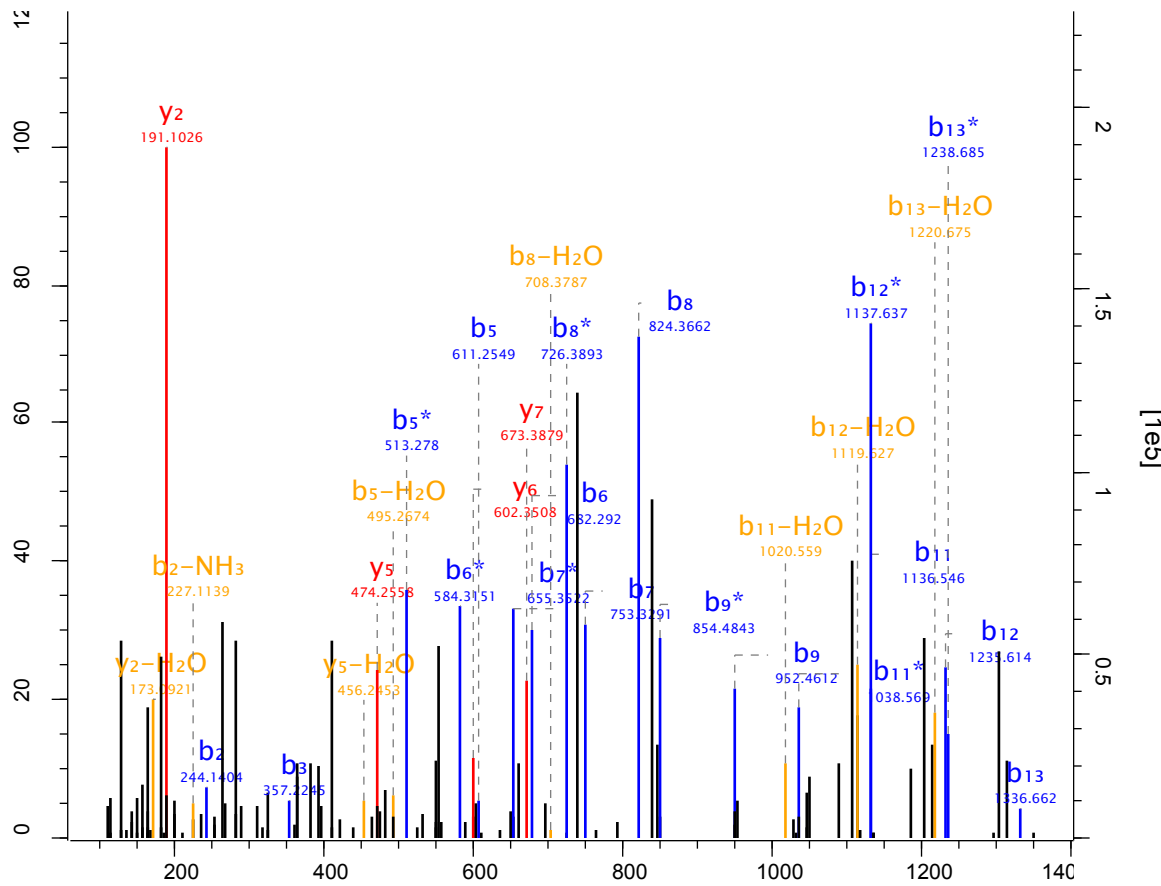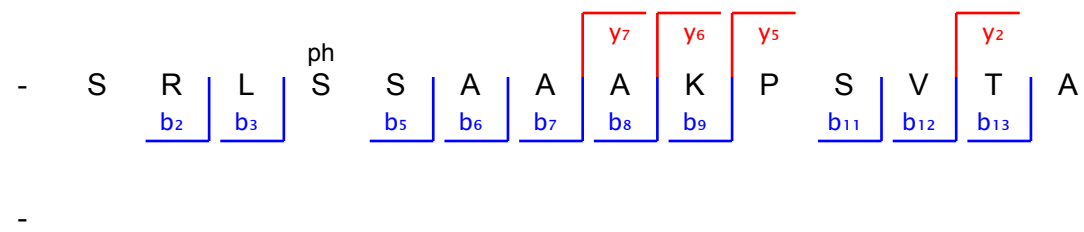

| Raw file           | Scan | Method    | Score | m/z    |
|--------------------|------|-----------|-------|--------|
| 201503_COL14_18_25 | 4471 | FTMS; HCD | 45.83 | 486.22 |

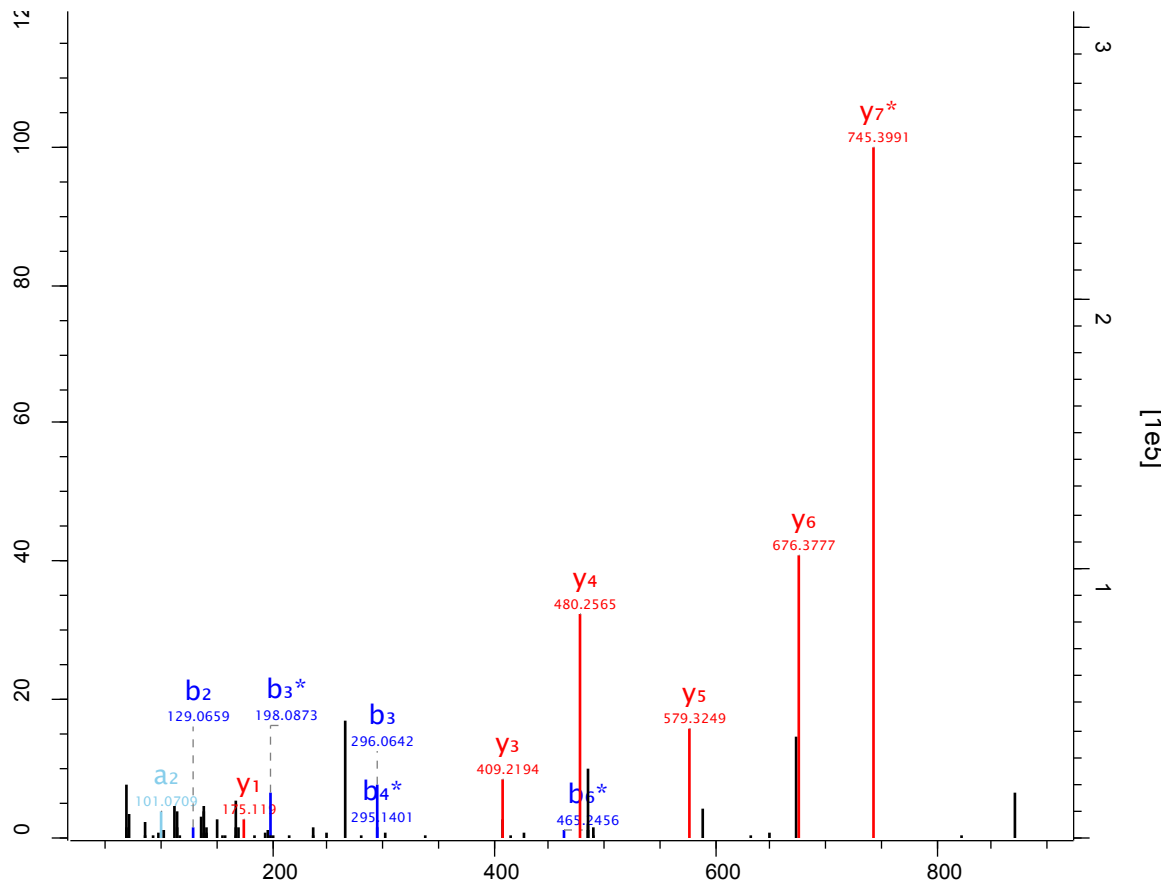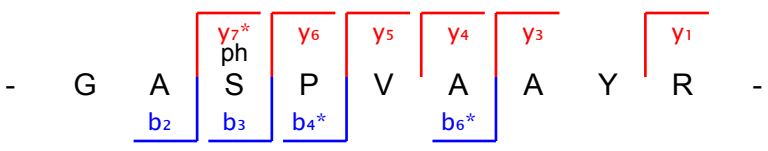

Raw file Scan Method Score m/z  
 201503\_COL14\_18\_25 4575 FTMS; HCD 88.02 558.27

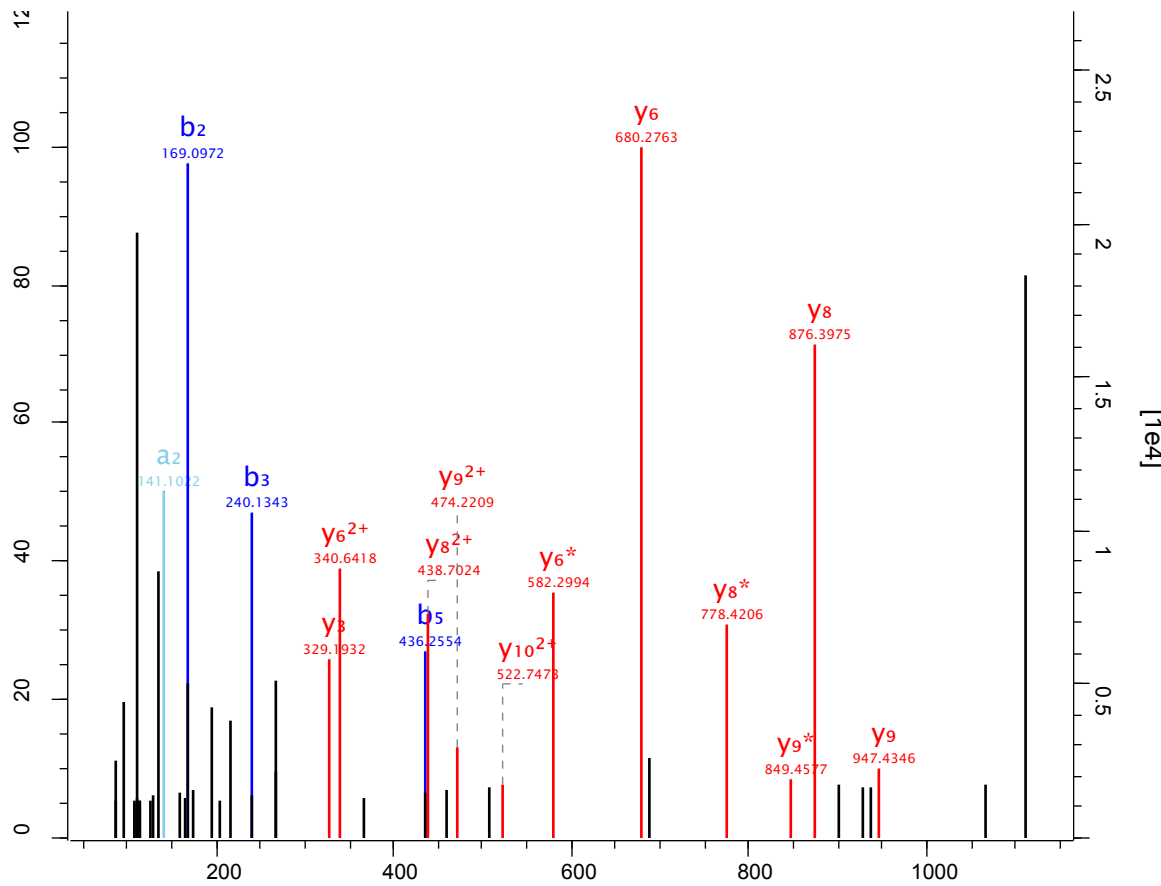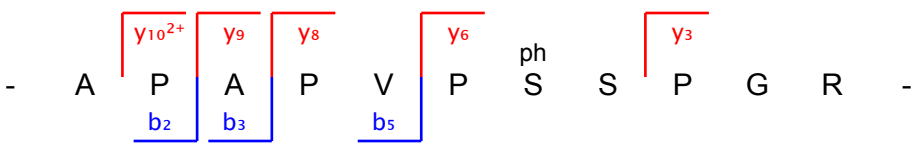

Raw file Scan Method Score m/z  
 201503\_COL14\_18\_25 5085 FTMS; HCD 63.47 539.77

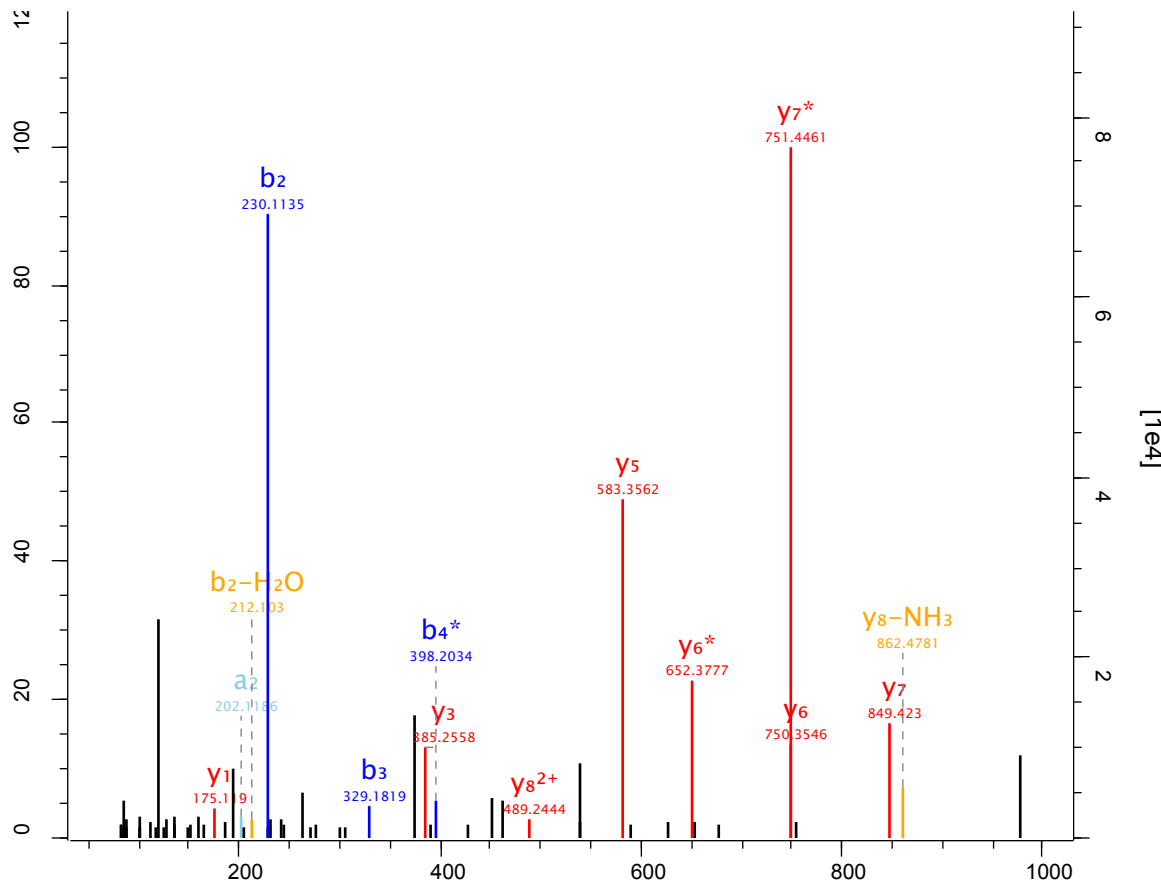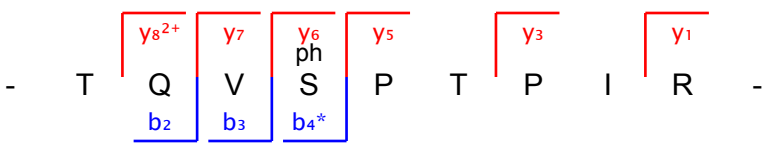

Raw file

Scan Method

Score

m/z

201503\_COL14\_18\_25

5804

FTMS; HCD

111.12

594.29

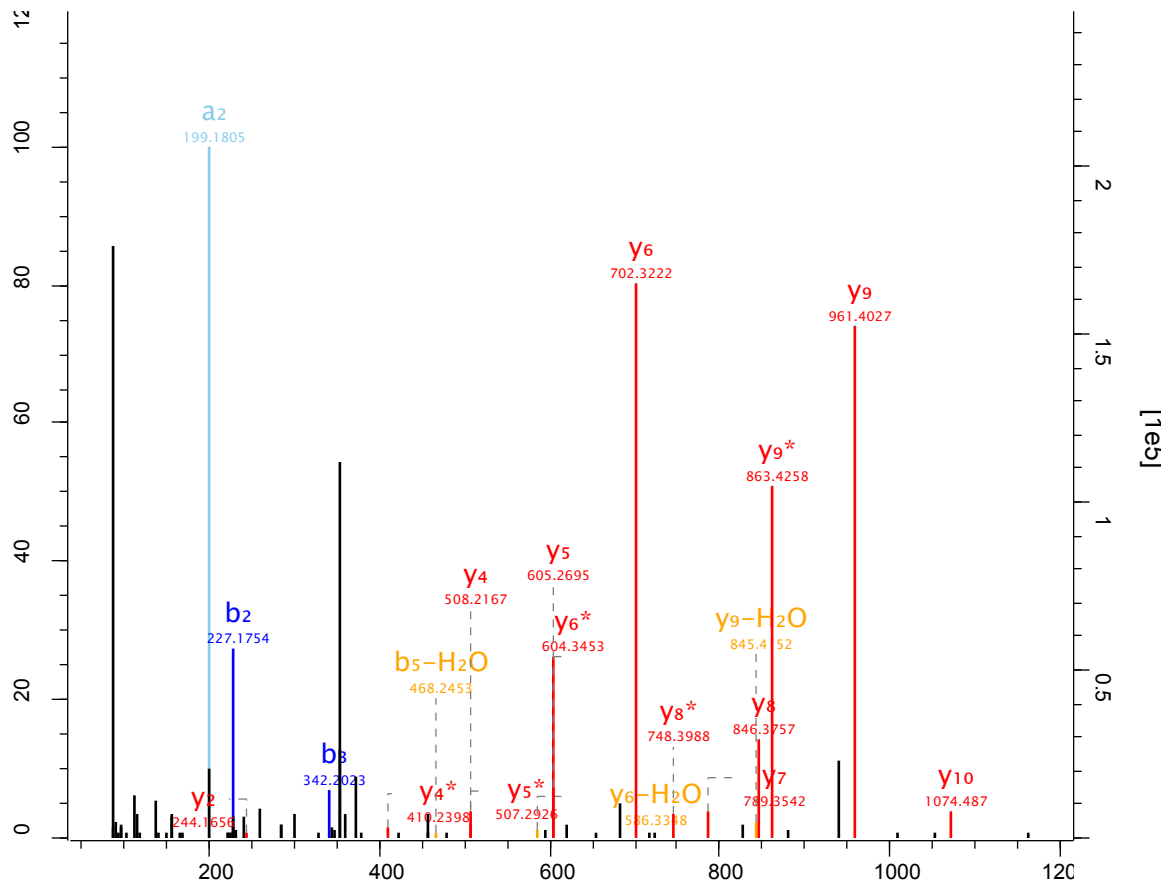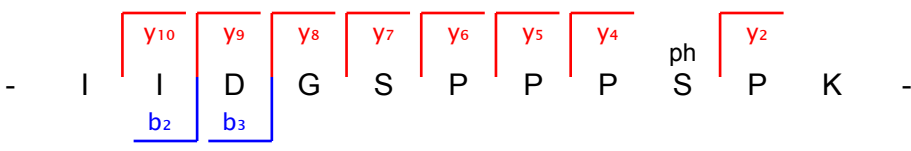

Raw file Scan Method Score m/z  
 201503\_COL14\_30\_34 10222 FTMS; HCD 95.2 937.94

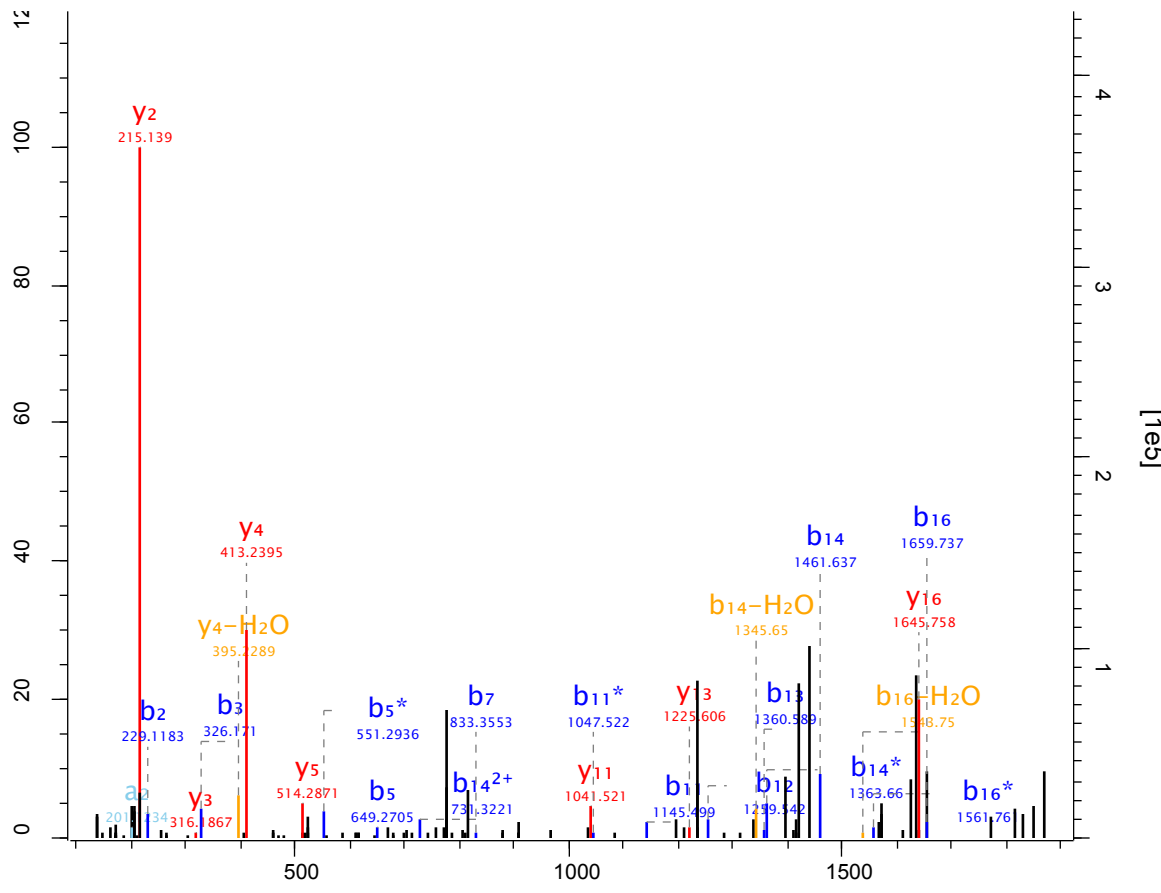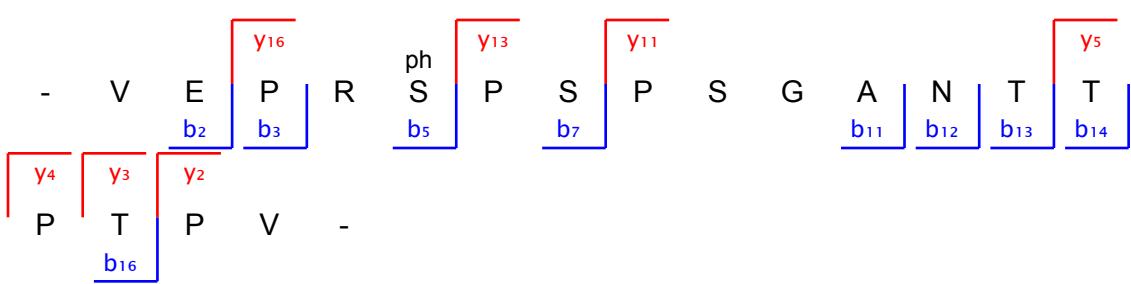



Raw file Scan Method Score m/z  
 201503\_COL14\_30\_34 10566 FTMS; HCD 58.89 703.81

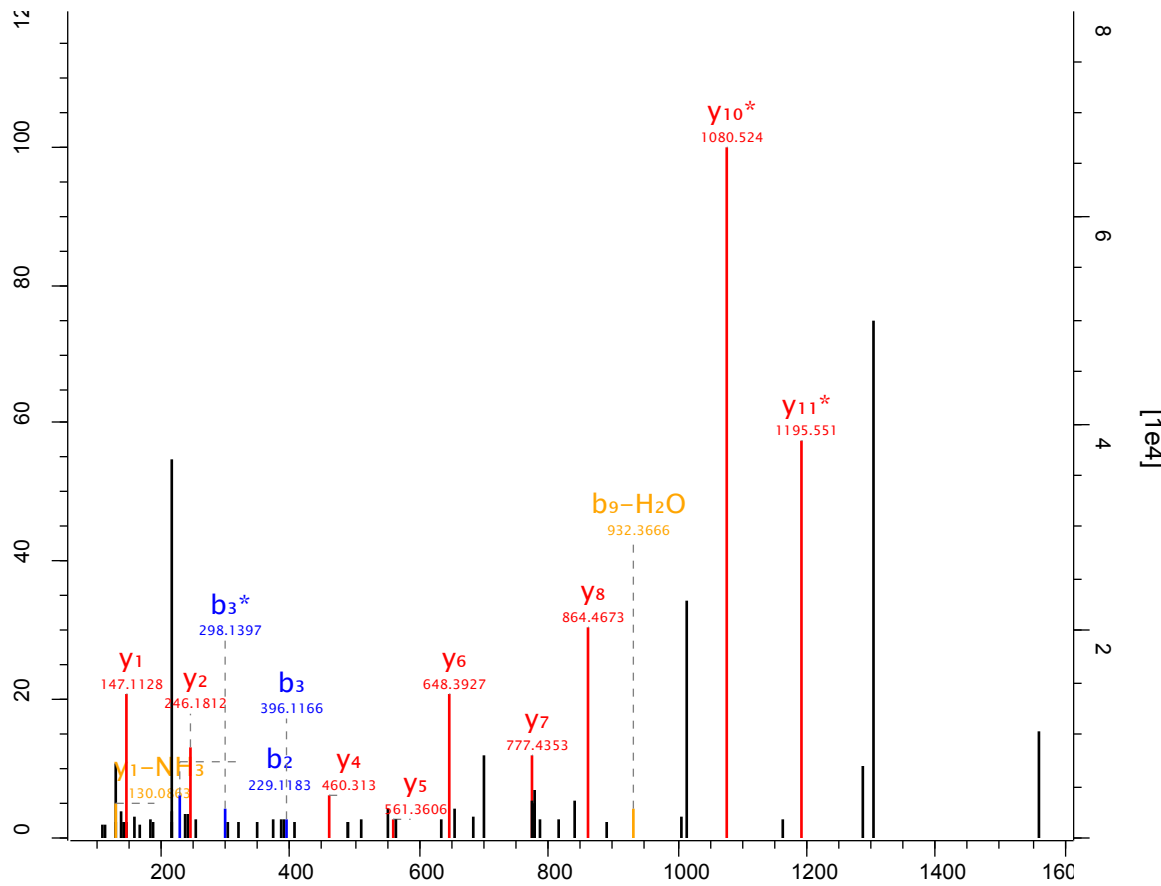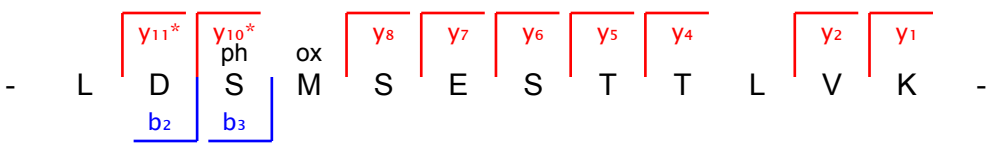

| Raw file           | Scan  | Method    | Score | m/z    |
|--------------------|-------|-----------|-------|--------|
| 201503_COL14_30_34 | 11449 | FTMS; HCD | 55.75 | 696.29 |

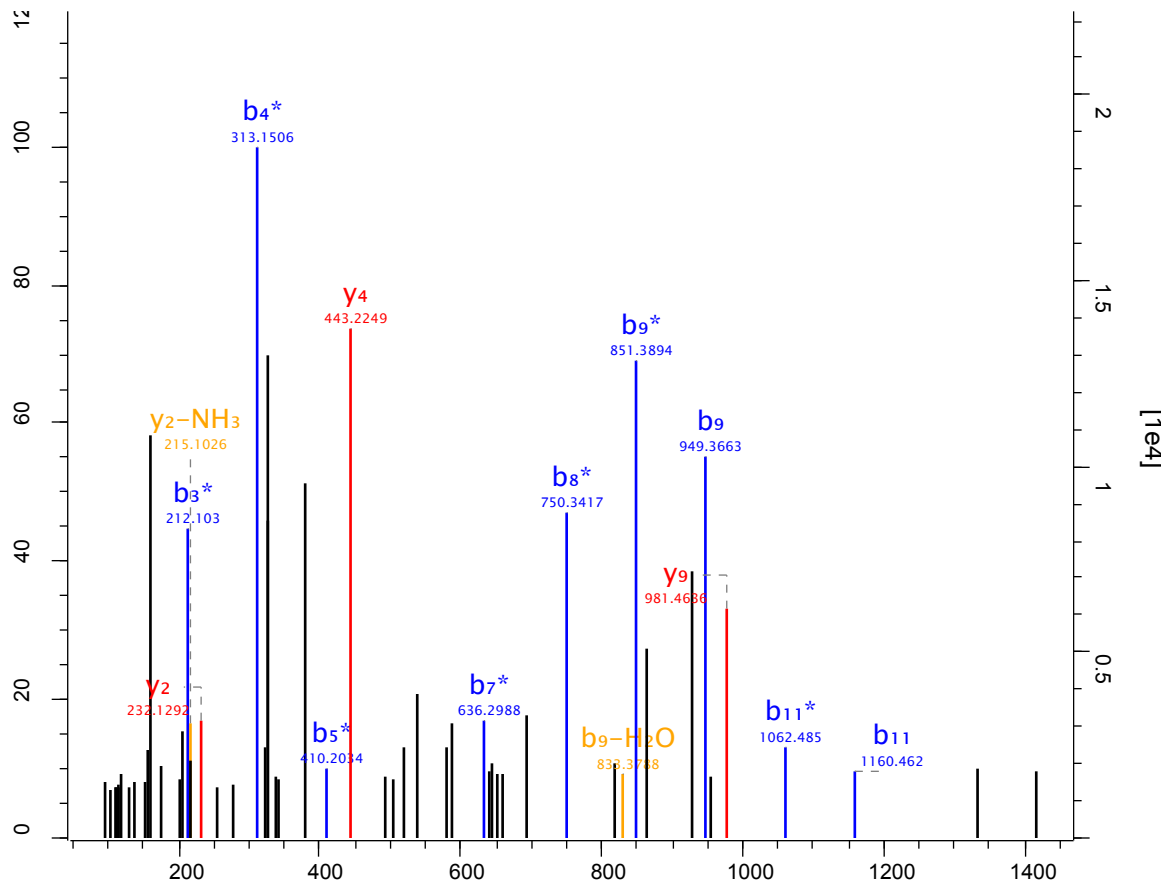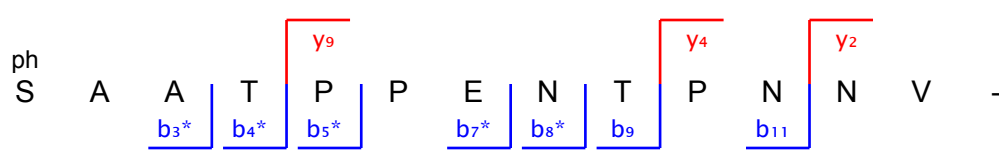

Raw file 201503\_COL14\_30\_34 Scan 11837 Method FTMS; HCD Score 173.21 m/z 596.62

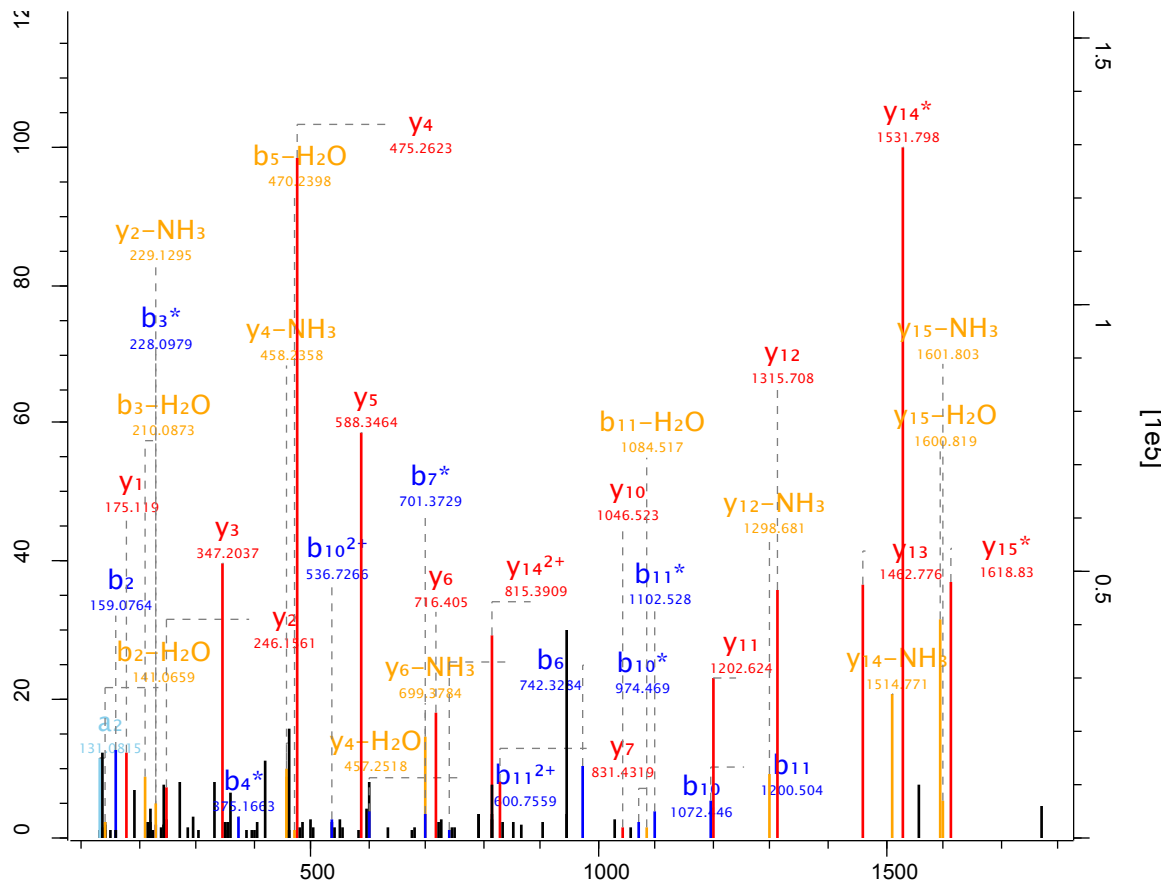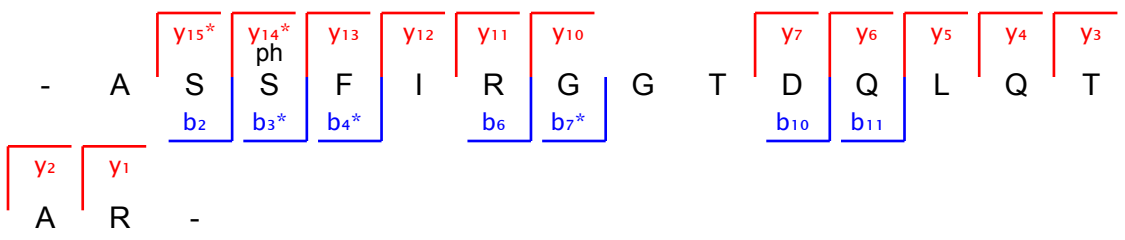

Raw file Scan Method Score m/z  
 201503\_COL14\_30\_34 11882 FTMS; HCD 44.51 550.77

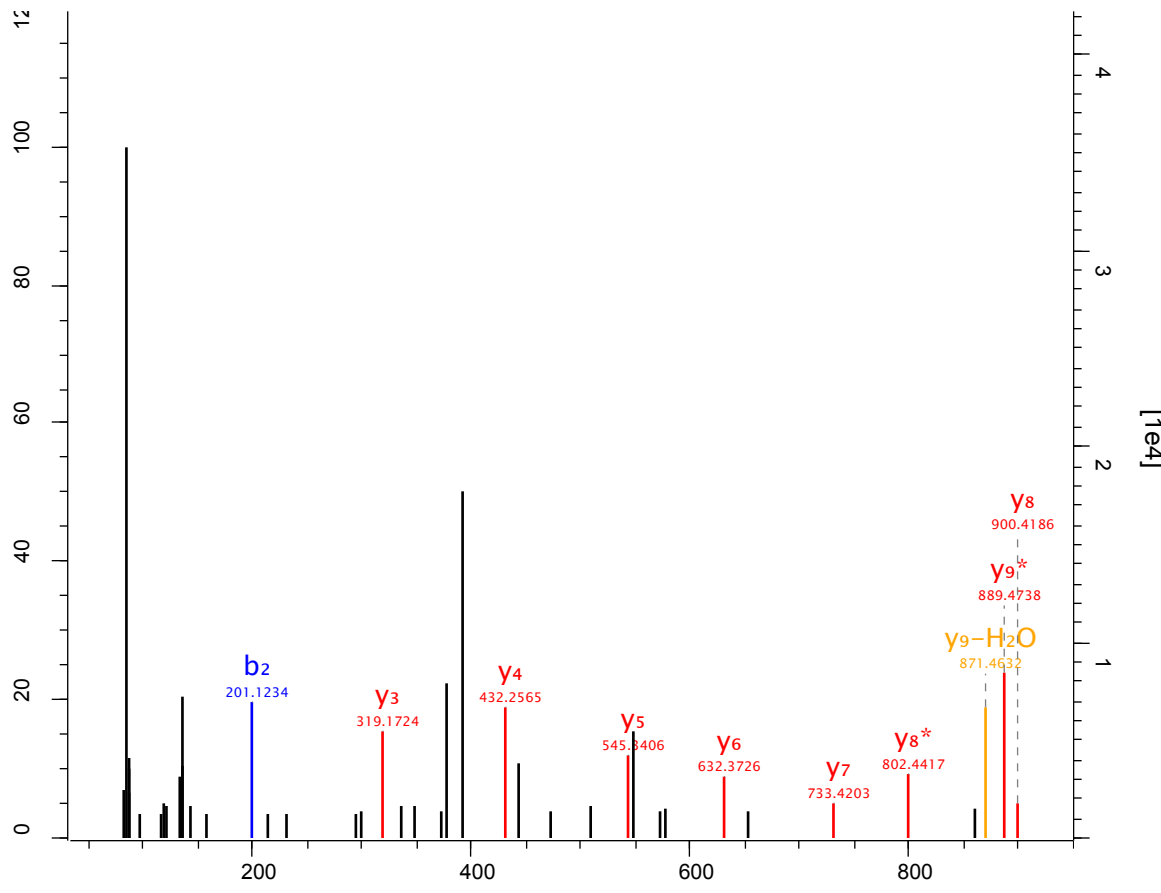

- I S S T S L I S G R -

Annotations above the sequence:

- y<sub>9</sub><sup>\*</sup> above the first S
- y<sub>8</sub> ph above the second S
- y<sub>7</sub> above the T
- y<sub>6</sub> above the first S
- y<sub>5</sub> above the L
- y<sub>4</sub> above the I
- y<sub>3</sub> above the second S

Annotation below the sequence:

- b<sub>2</sub> below the first S

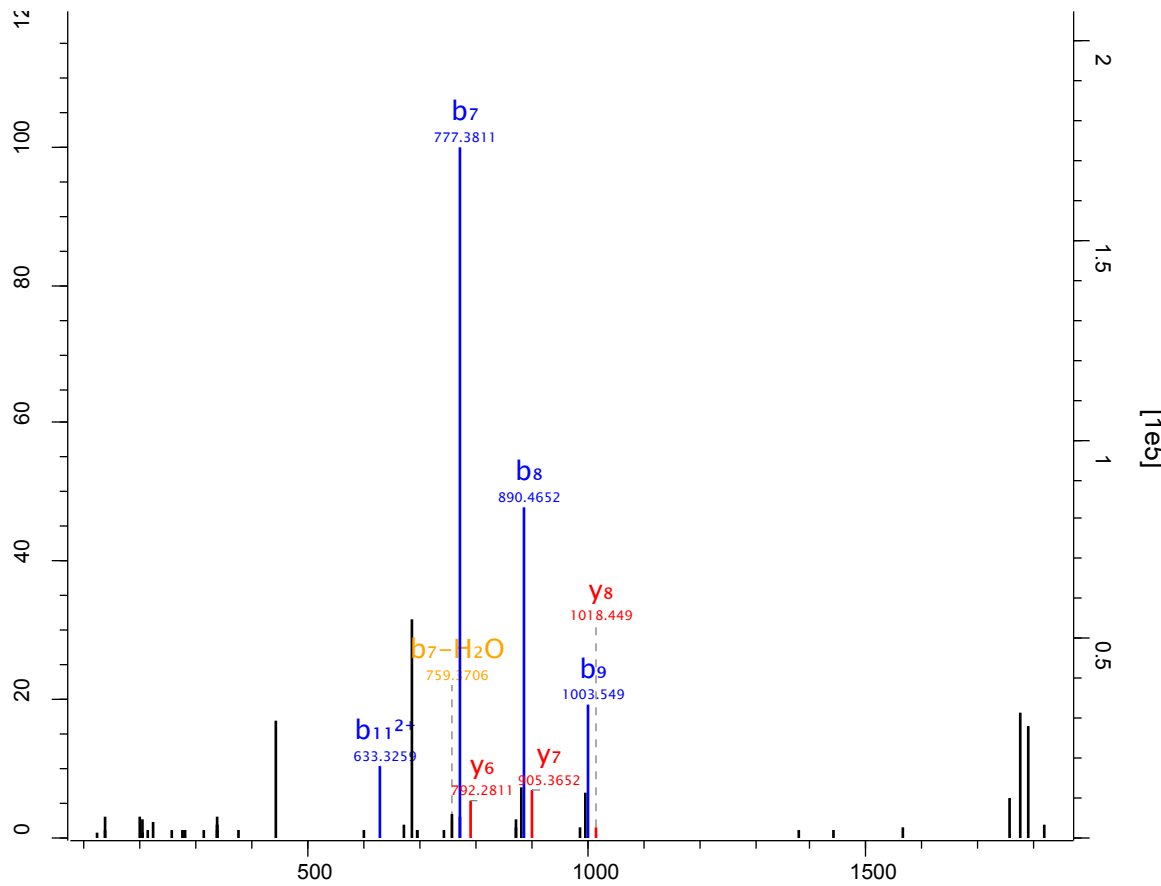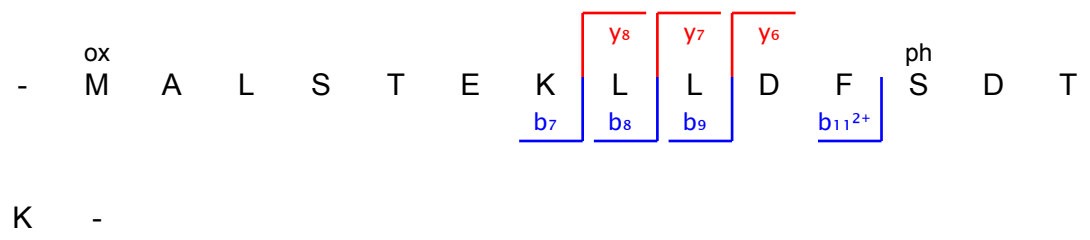

Raw file 201503\_COL14\_30\_34 Scan 22178 Method FTMS; HCD Score 43.77 m/z 639.29

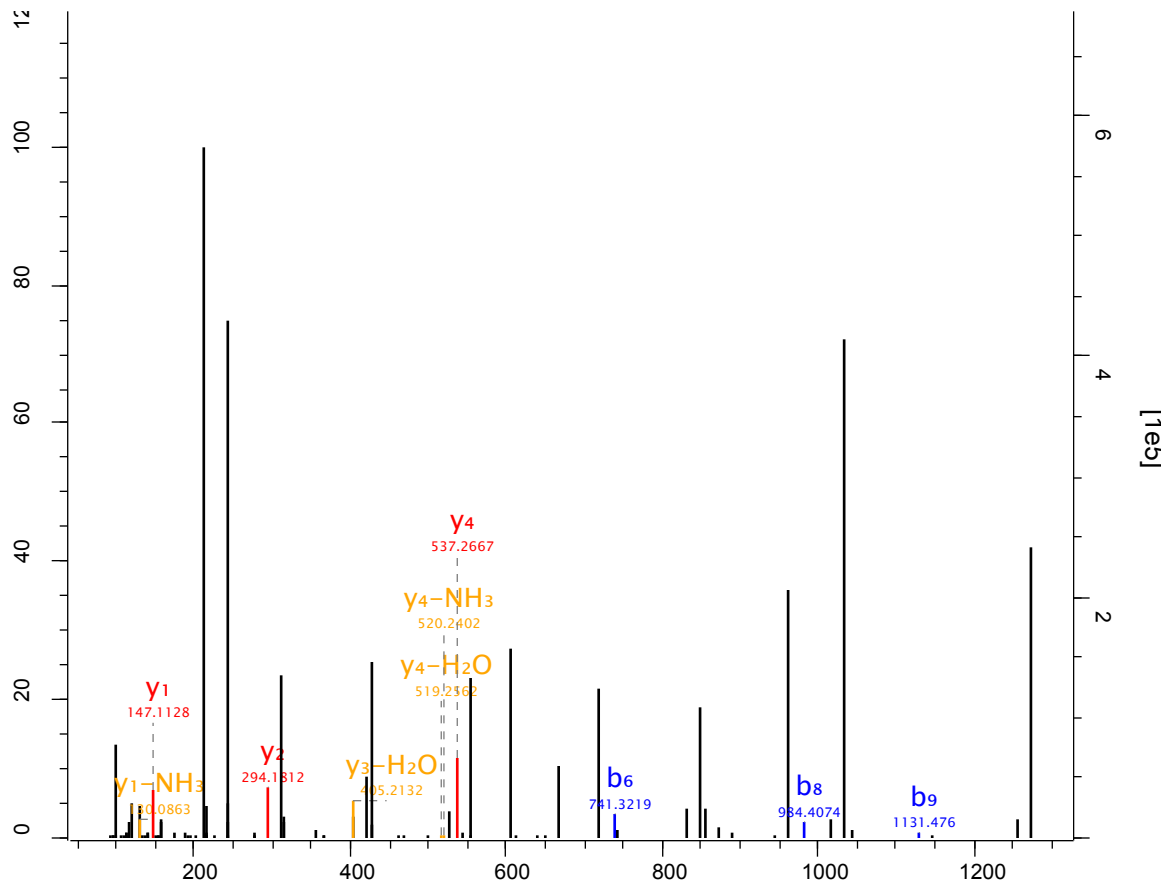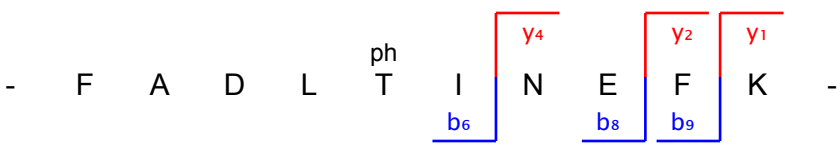

Raw file 201503\_COL14\_30\_34 Scan 26009 Method FTMS; HCD Score 86.52 m/z 826.36

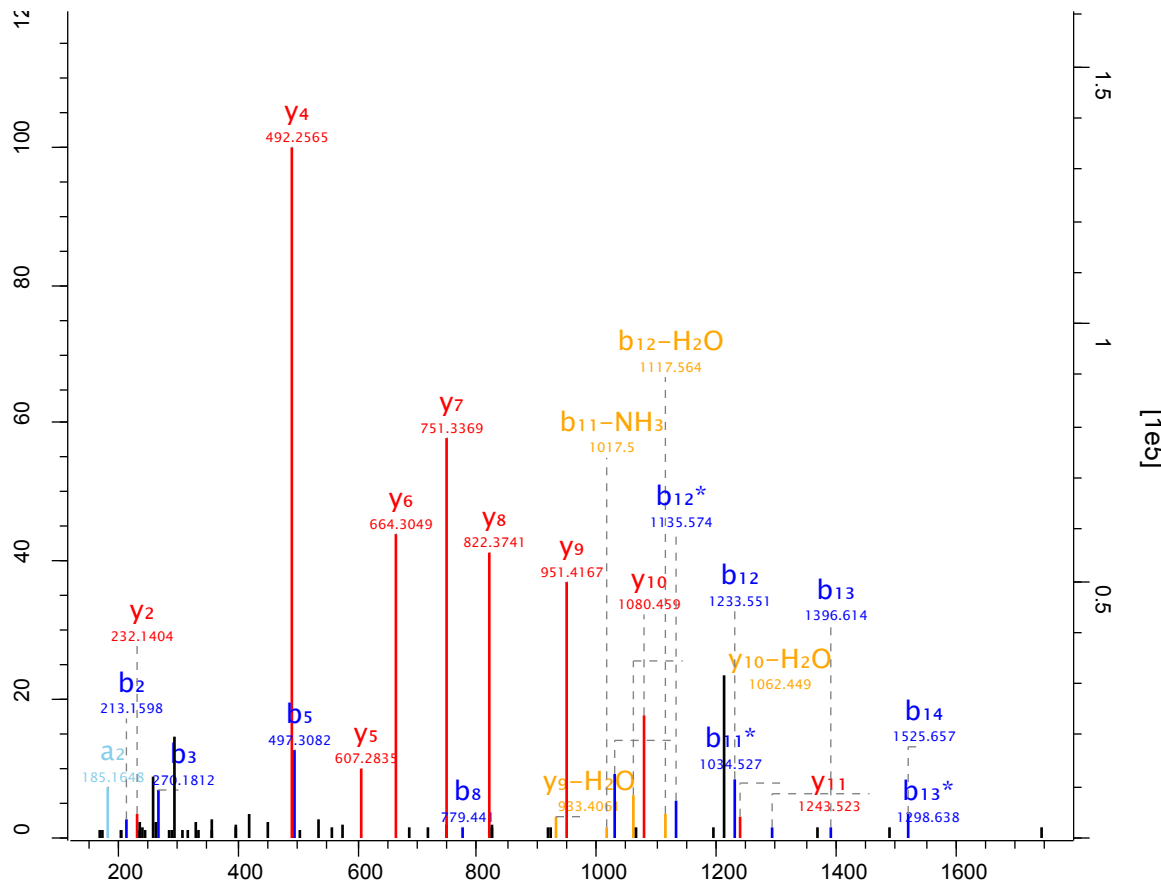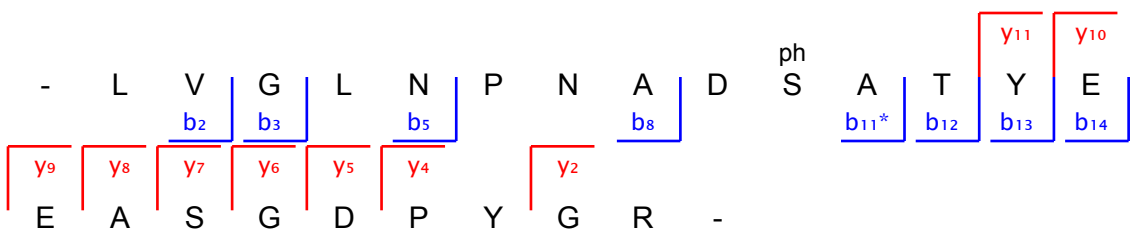

Raw file Scan Method Score m/z  
 201503\_COL14\_30\_34 2889 FTMS; HCD 50.36 624.95

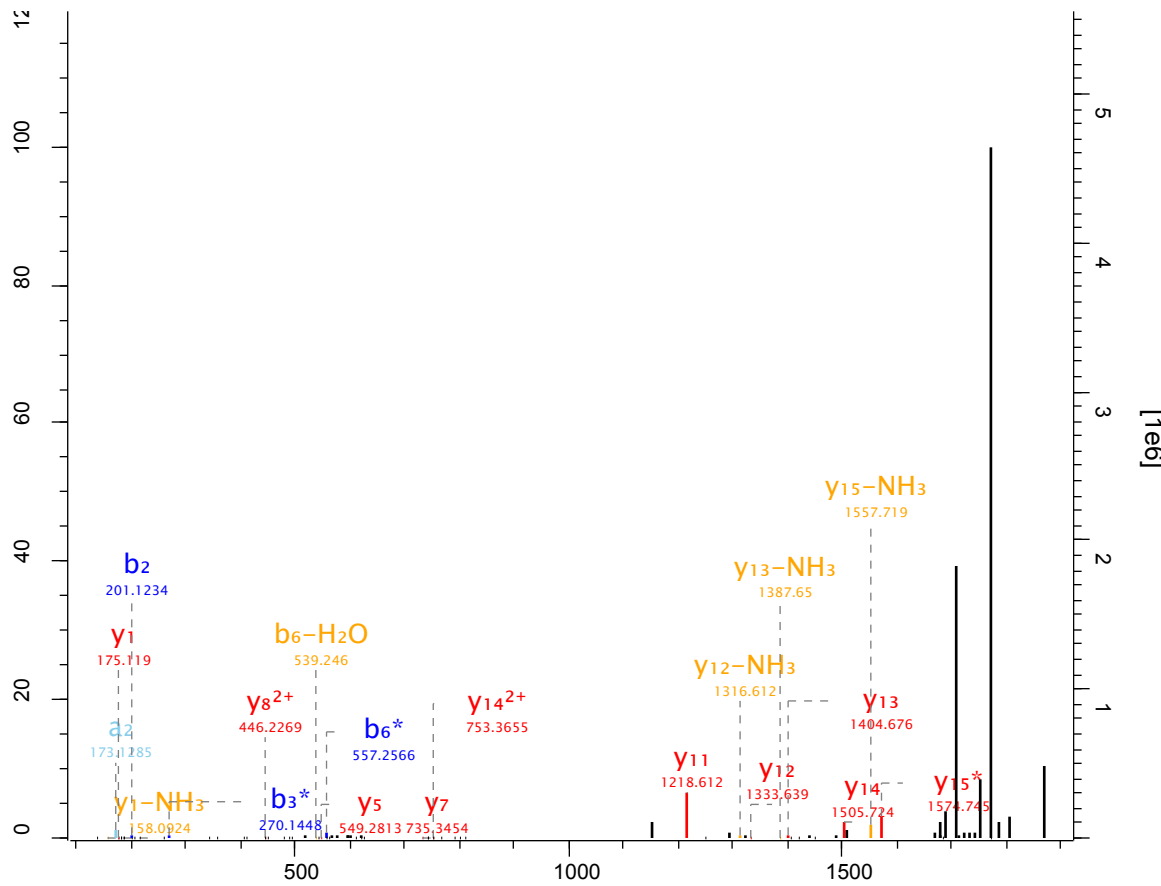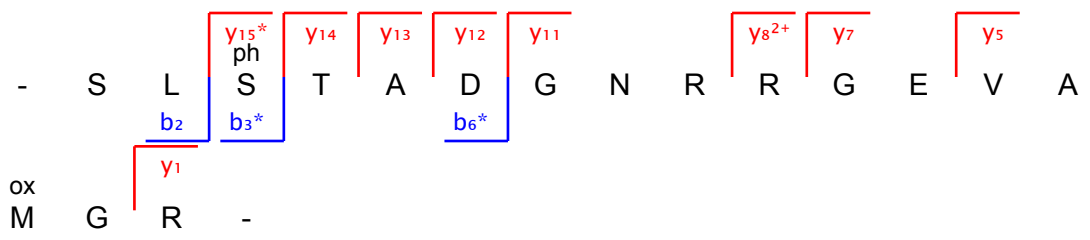



Raw file 201503\_COL14\_30\_34 Scan 29327 Method FTMS; HCD Score 127.01 m/z 997.44

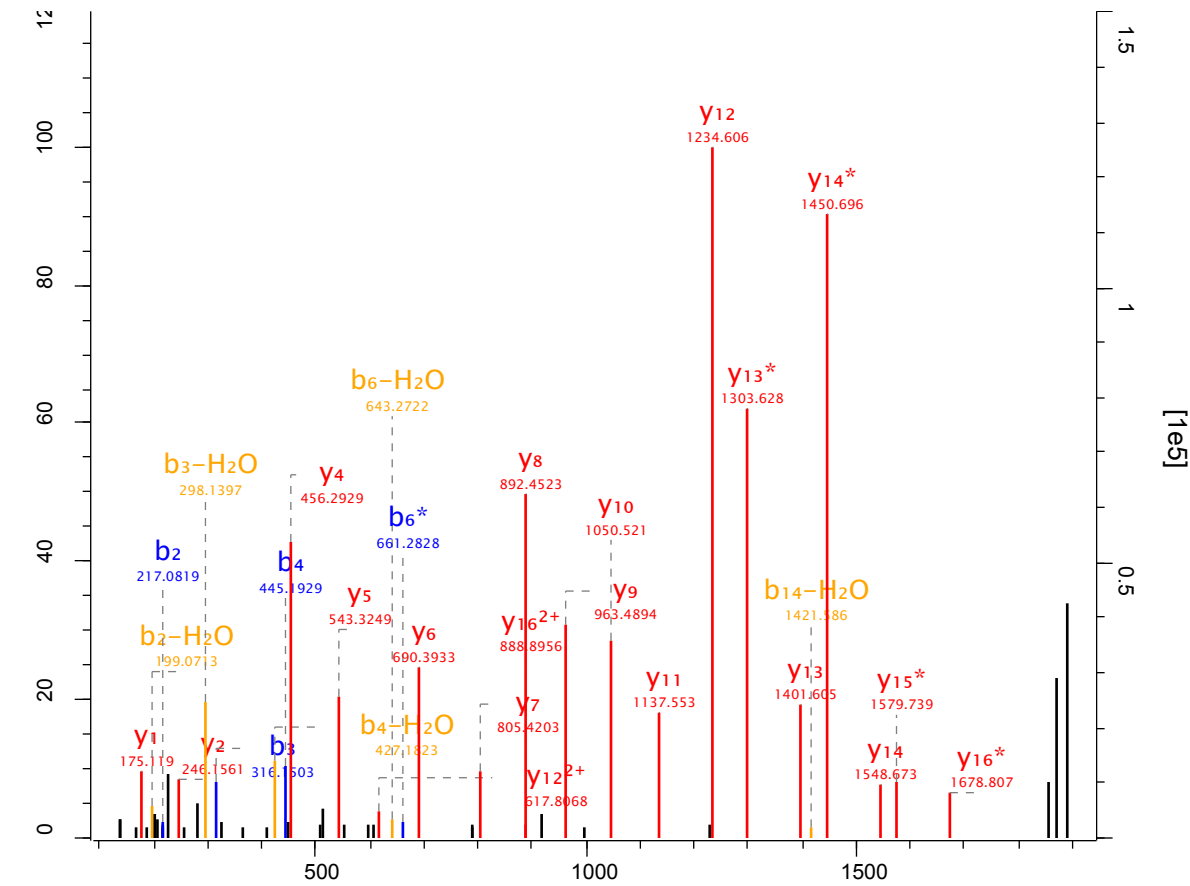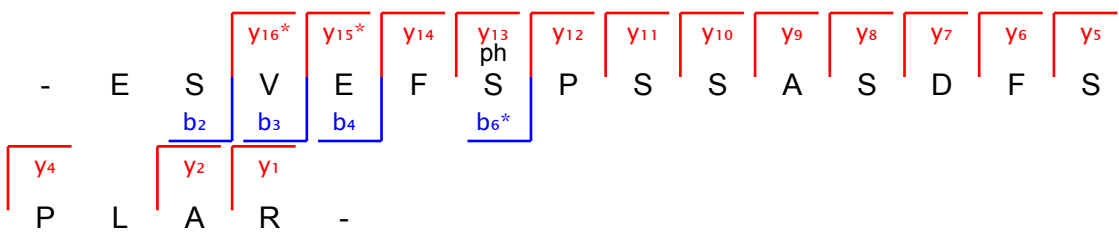

Raw file Scan Method Score m/z  
 201503\_COL14\_30\_34 3793 FTMS; HCD 67.65 701.81

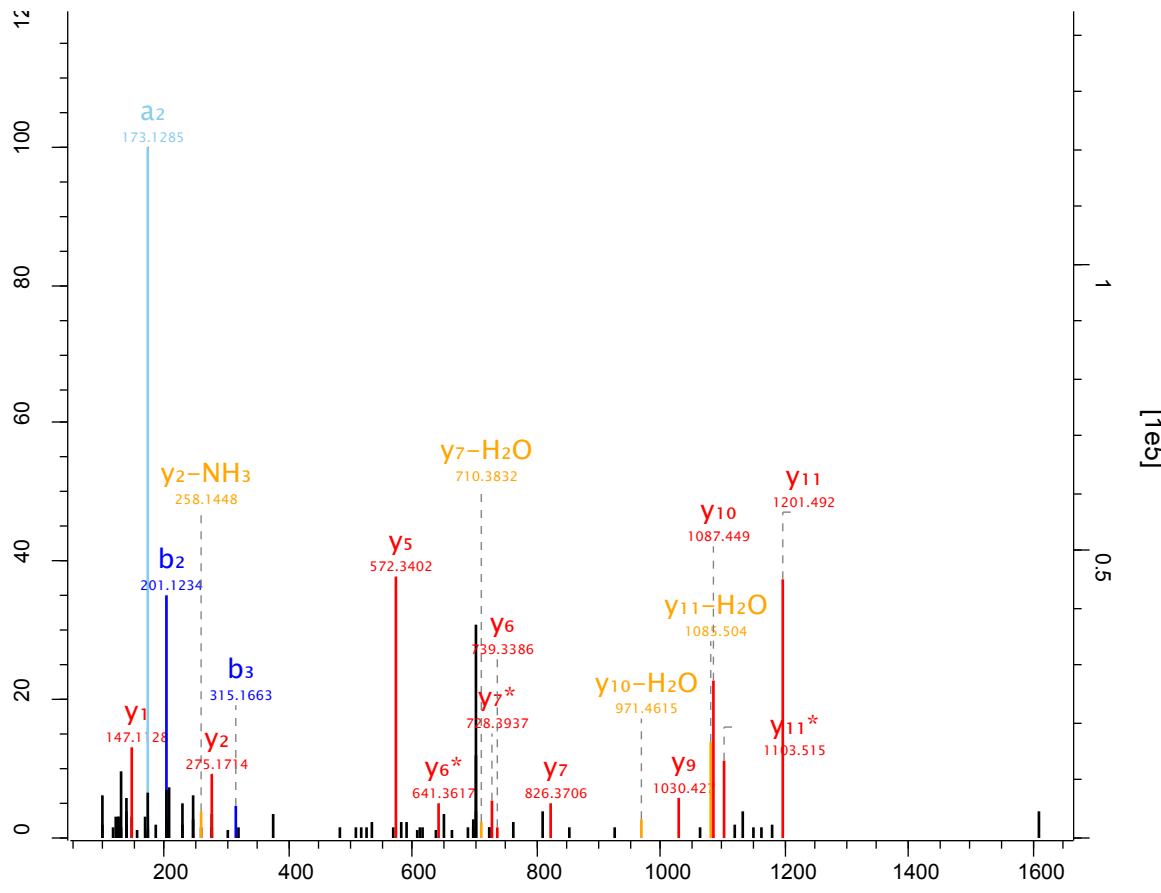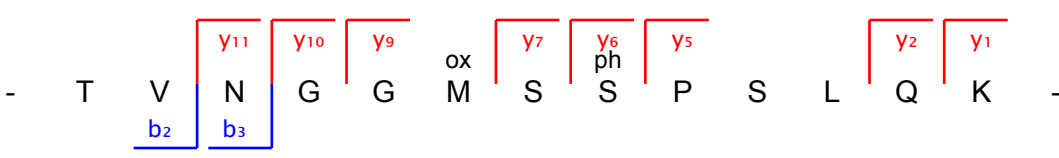

Raw file Scan Method Score m/z  
 201503\_COL14\_30\_34 4555 FTMS; HCD 79.69 635.29

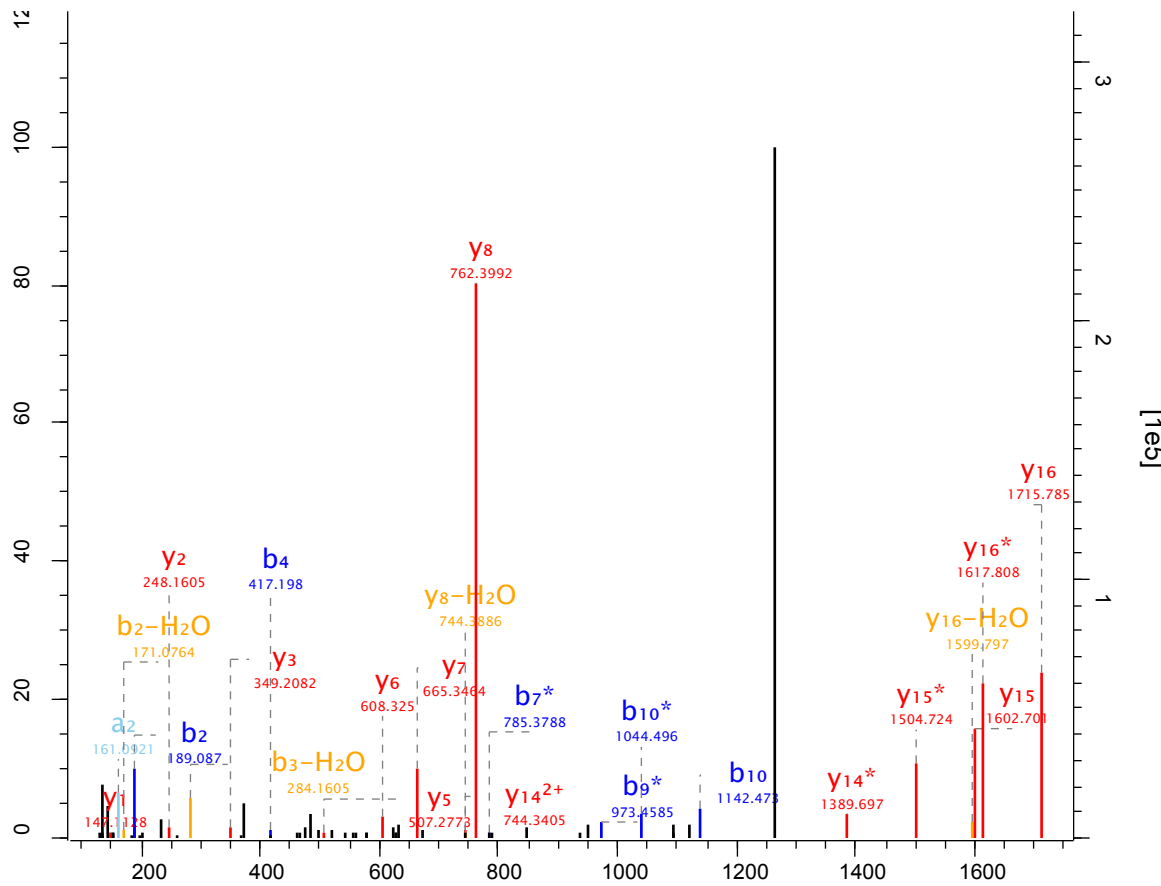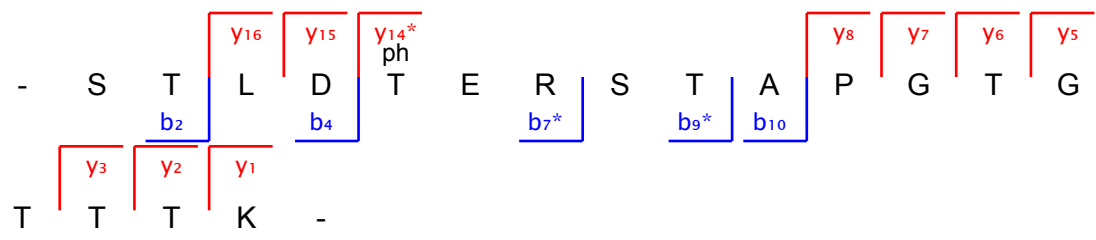

Raw file

Scan Method

Score m/z

201503\_COL14\_30\_34

5612

FTMS; HCD

69.92

504.57

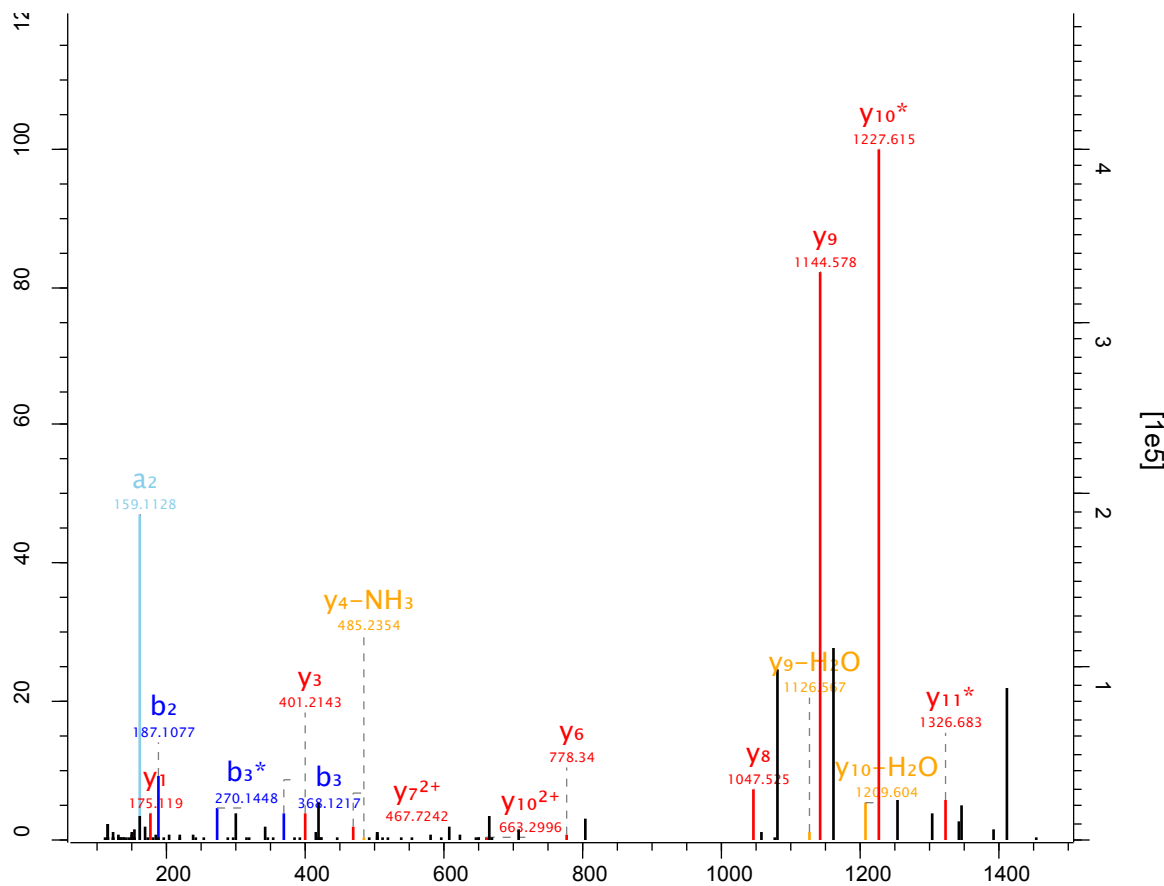

- S V P L R E ox M T P E R -

y11\*
y10\*
y9
y8
y7<sup>2+</sup>
y6
ox
M
T
y3
E
y1

b2
b3

Raw file

201503\_COL14\_30\_34

Scan

5682

Method

FTMS; HCD

Score

42.47

m/z

524.75

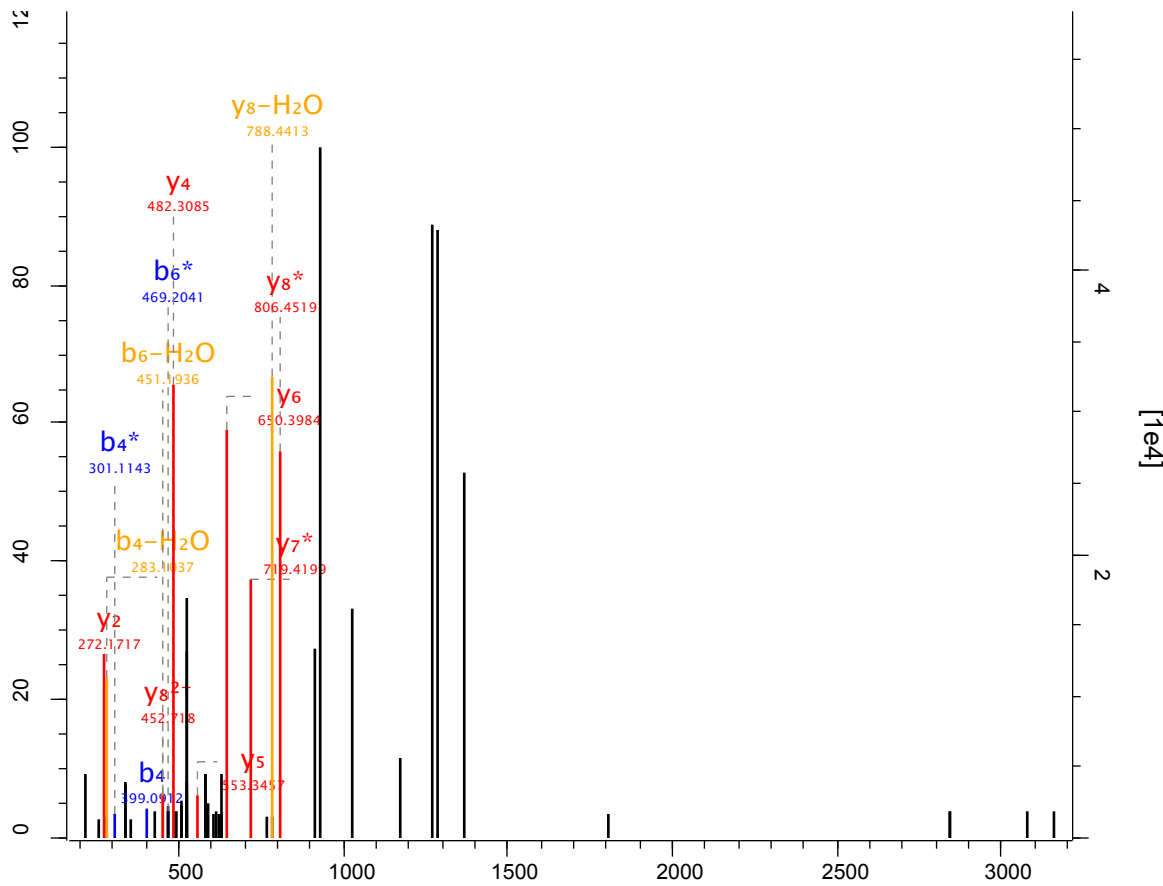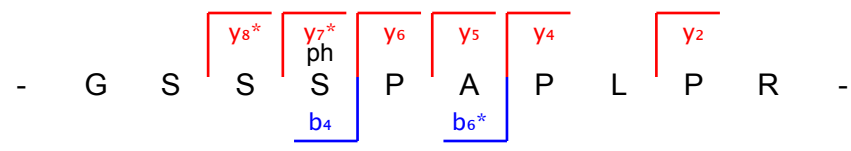

Raw file 201503\_COL14\_30\_34 Scan 6877 Method FTMS; HCD Score 119.34 m/z 677.66

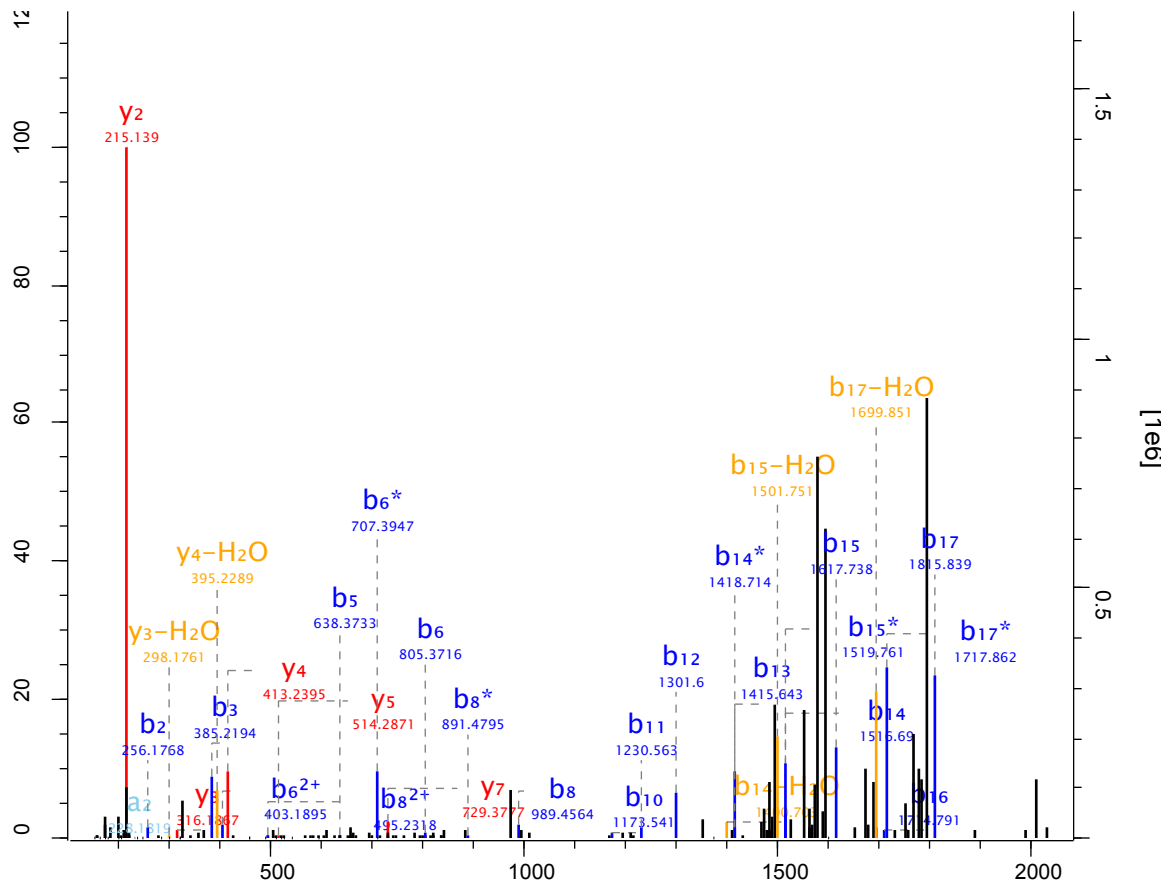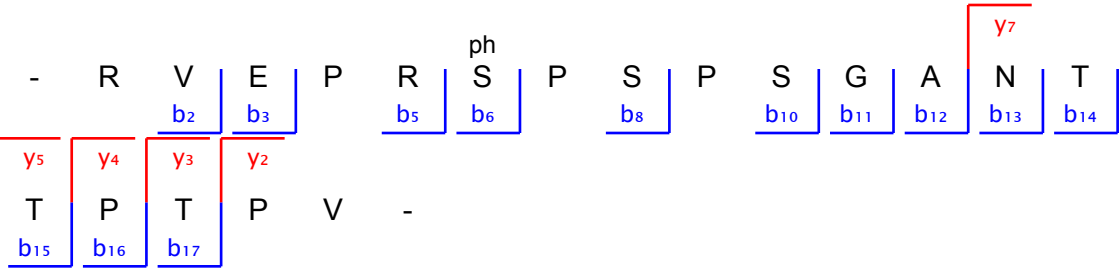

Raw file

Scan Method

Score

m/z

201503\_COL14\_30\_34

7697

FTMS; HCD

184.34

562.77

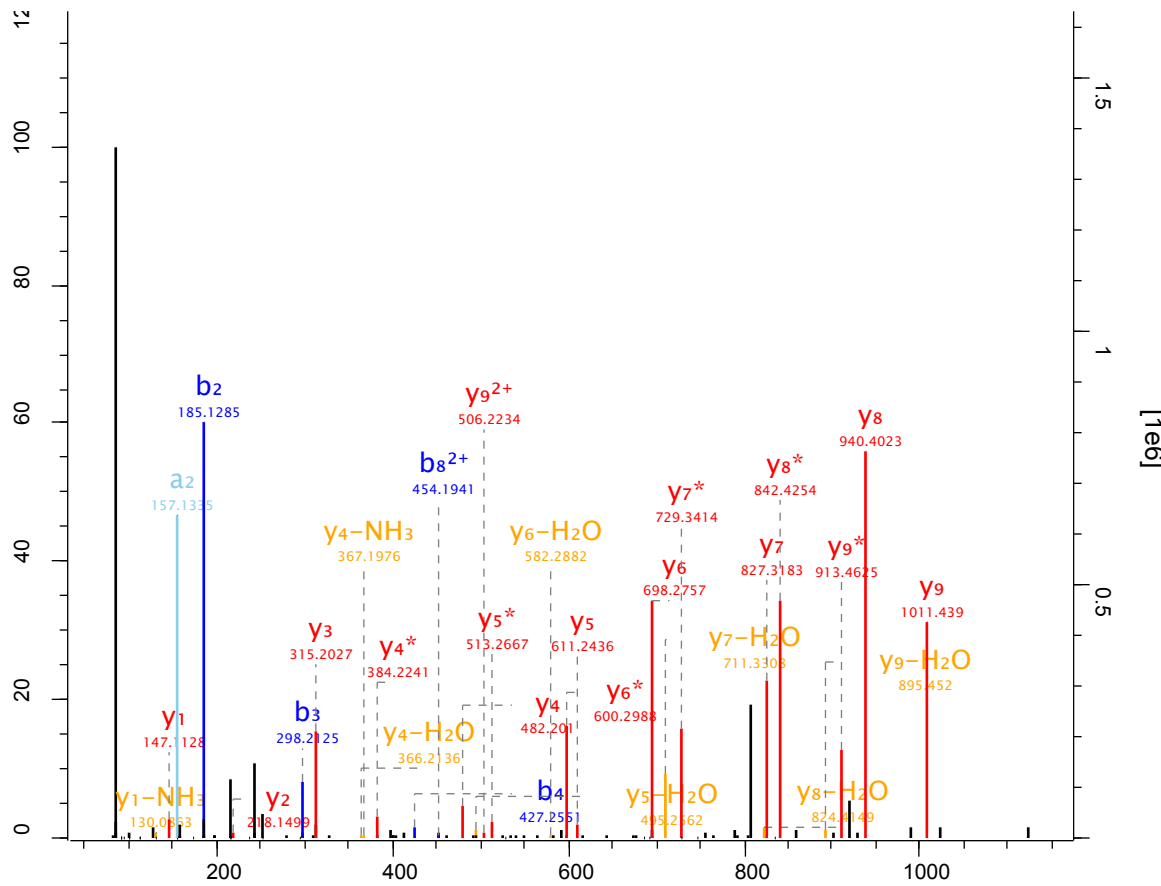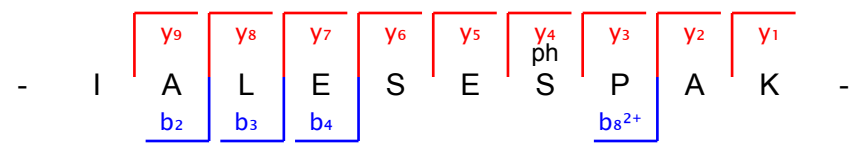

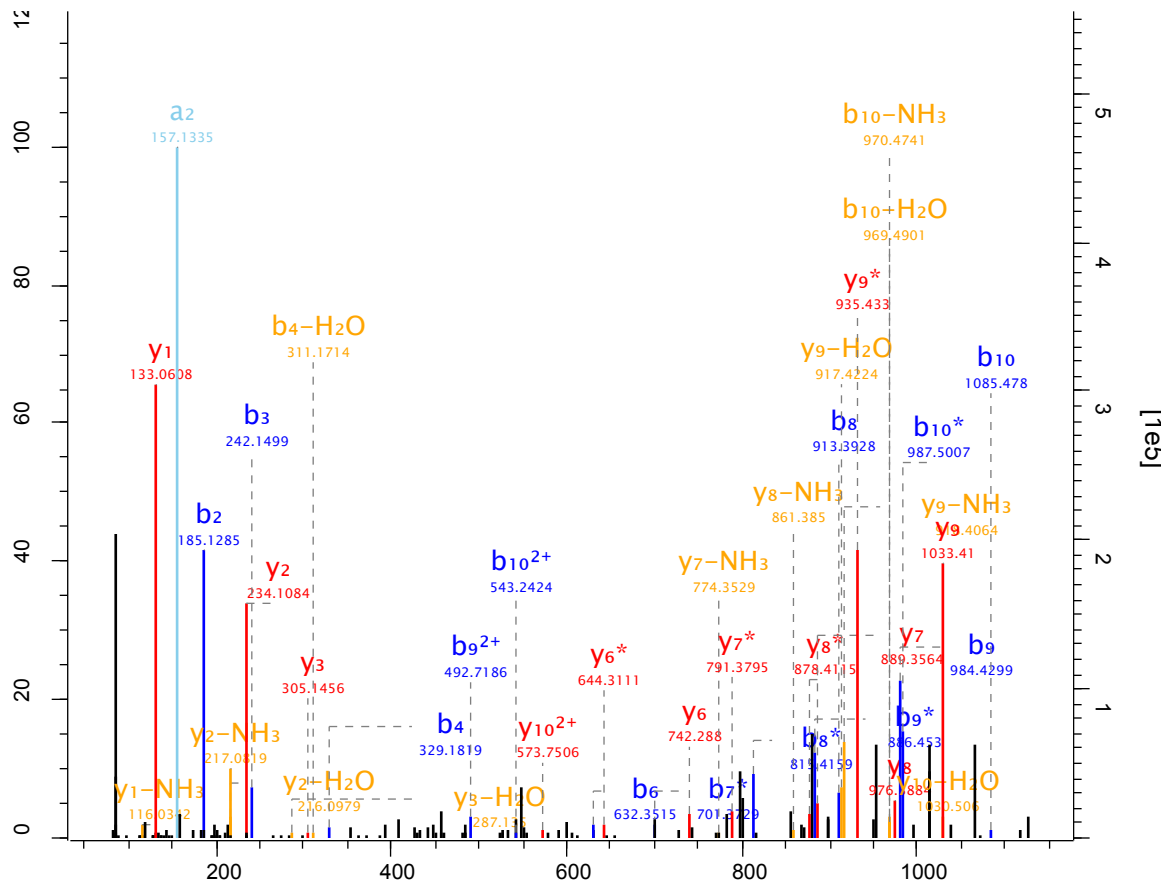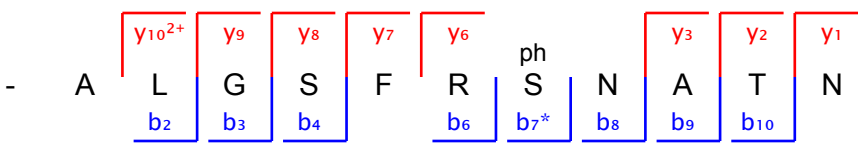





Raw file Scan Method Score m/z  
 30\_34 10219 FTMS; HCD 83.25 601.29

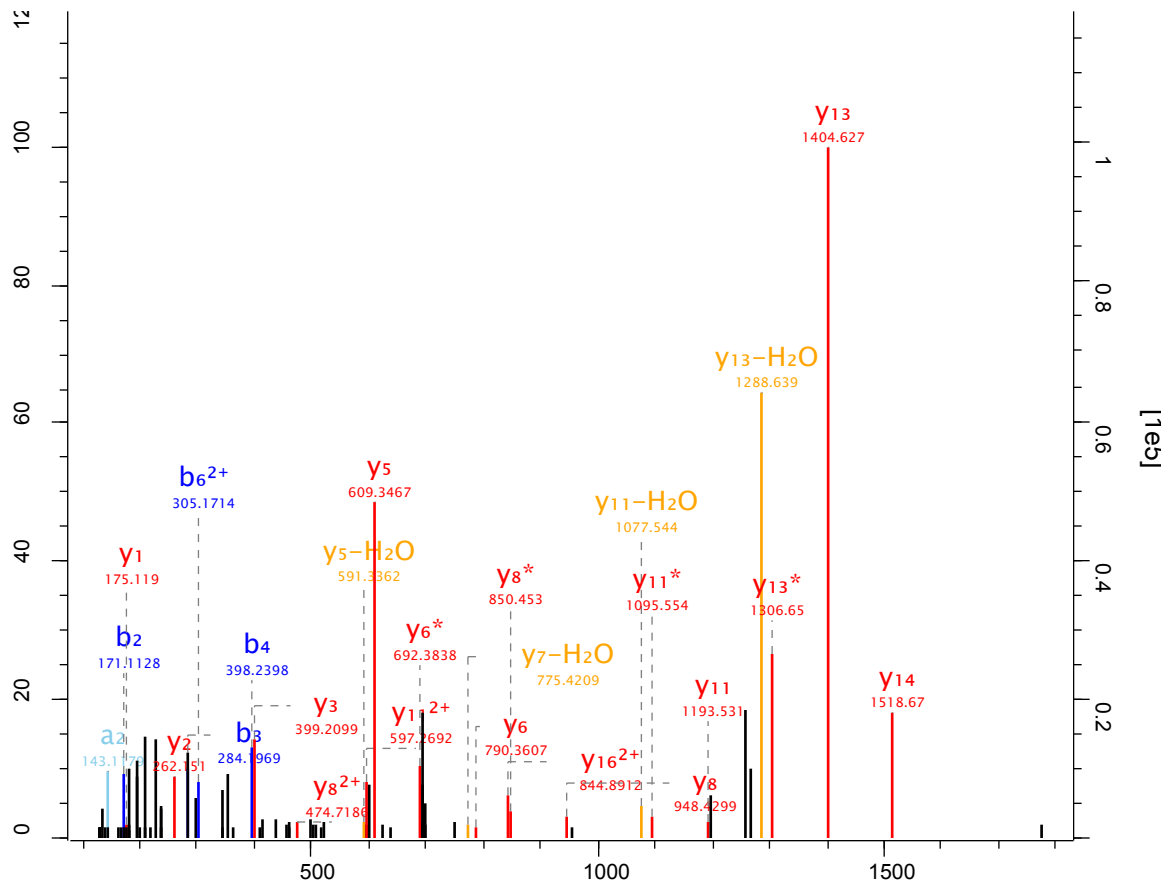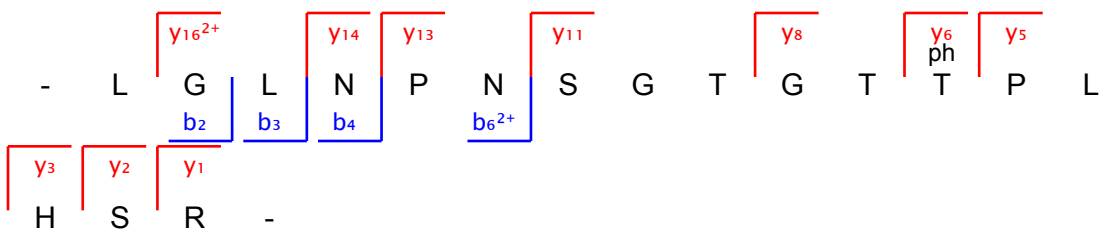

Raw file Scan Method Score m/z  
 30\_34 10352 FTMS; HCD 48.47 644.8

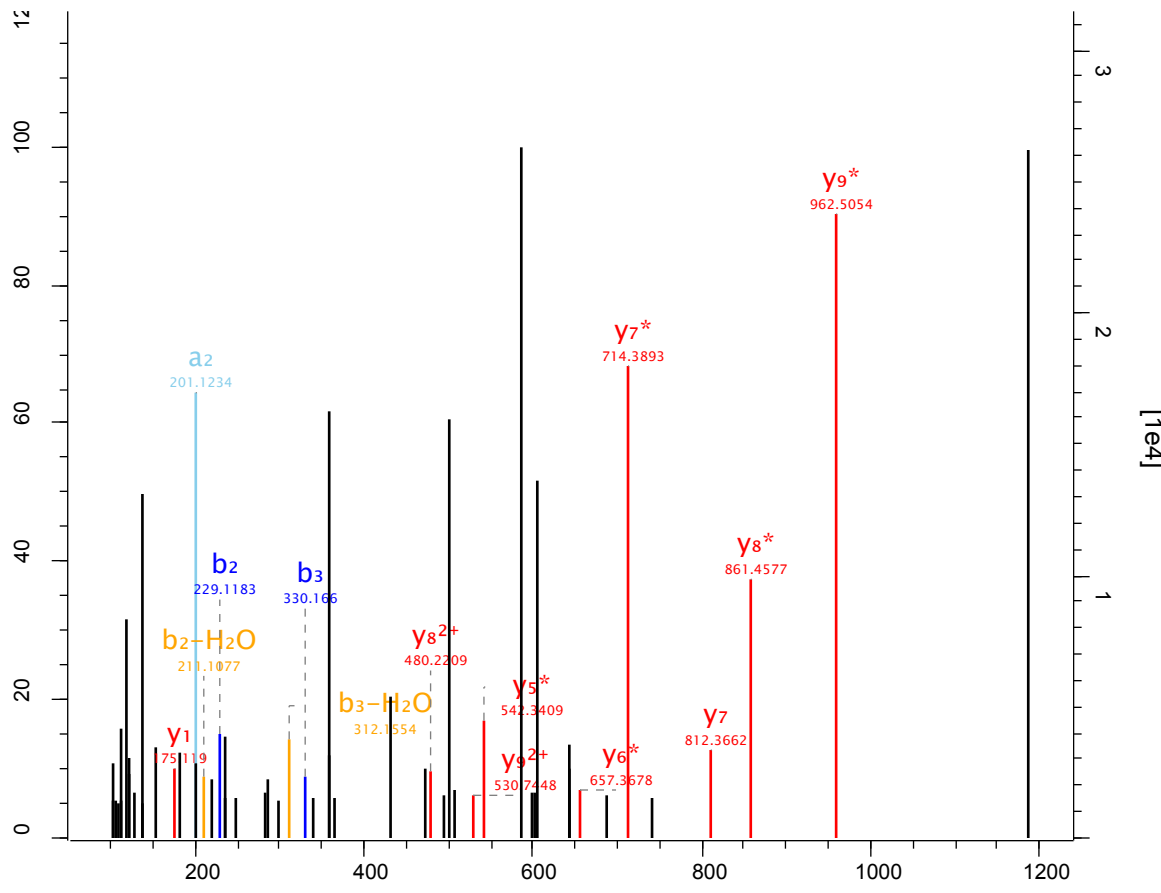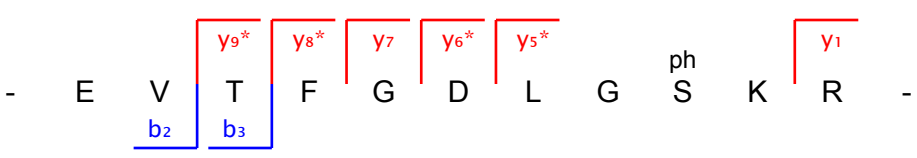

Raw file Scan Method Score m/z  
 30\_34 10732 FTMS; HCD 289.02 750.02

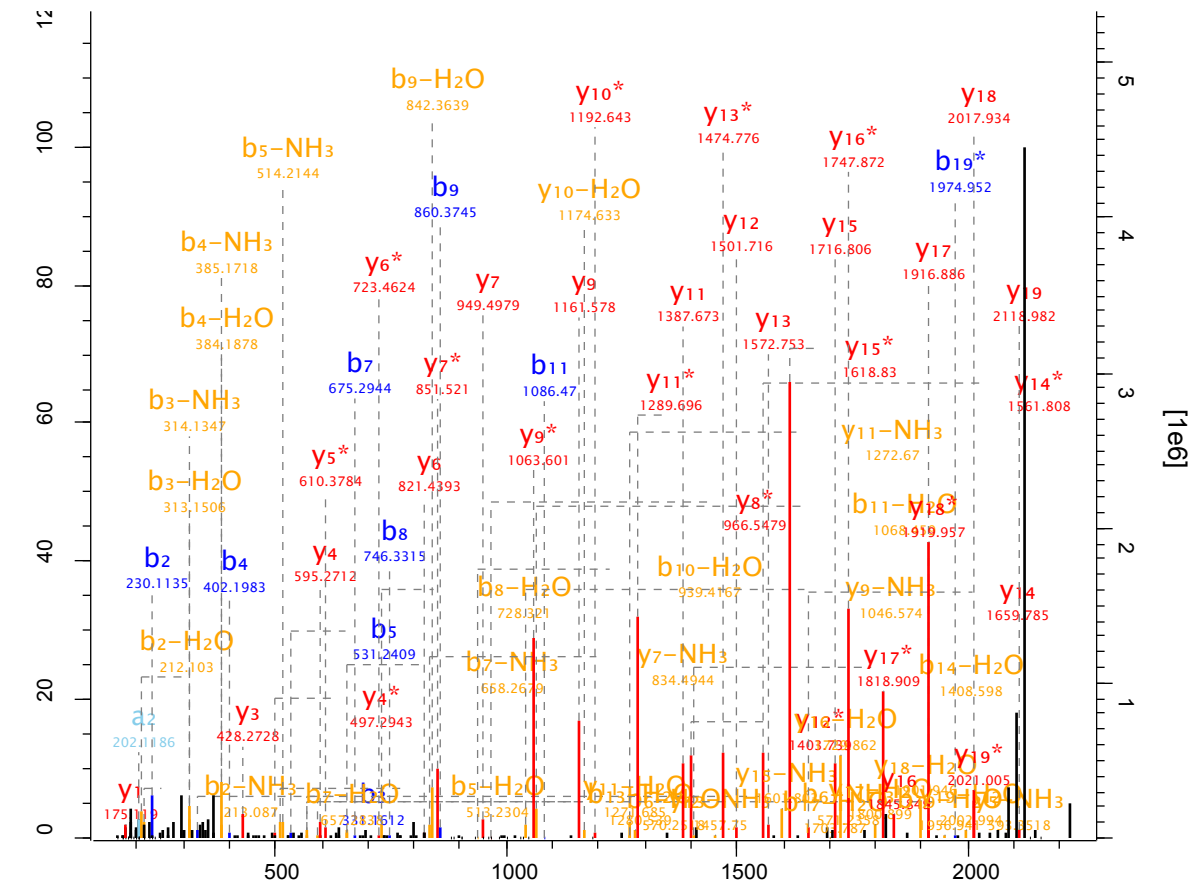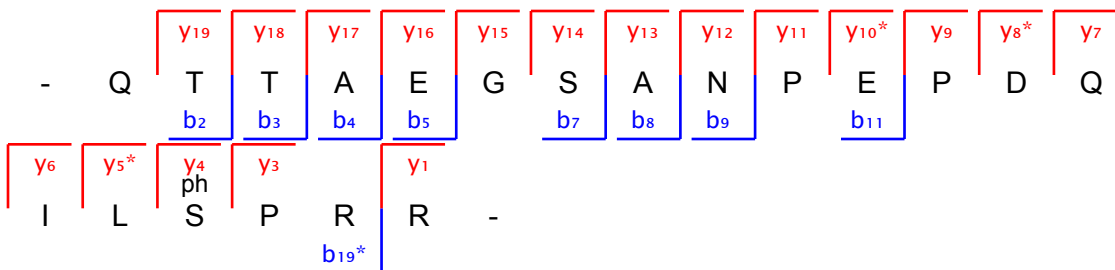

| Raw file | Scan  | Method    | Score | m/z    |
|----------|-------|-----------|-------|--------|
| 30_34    | 11923 | FTMS; HCD | 52.58 | 560.25 |

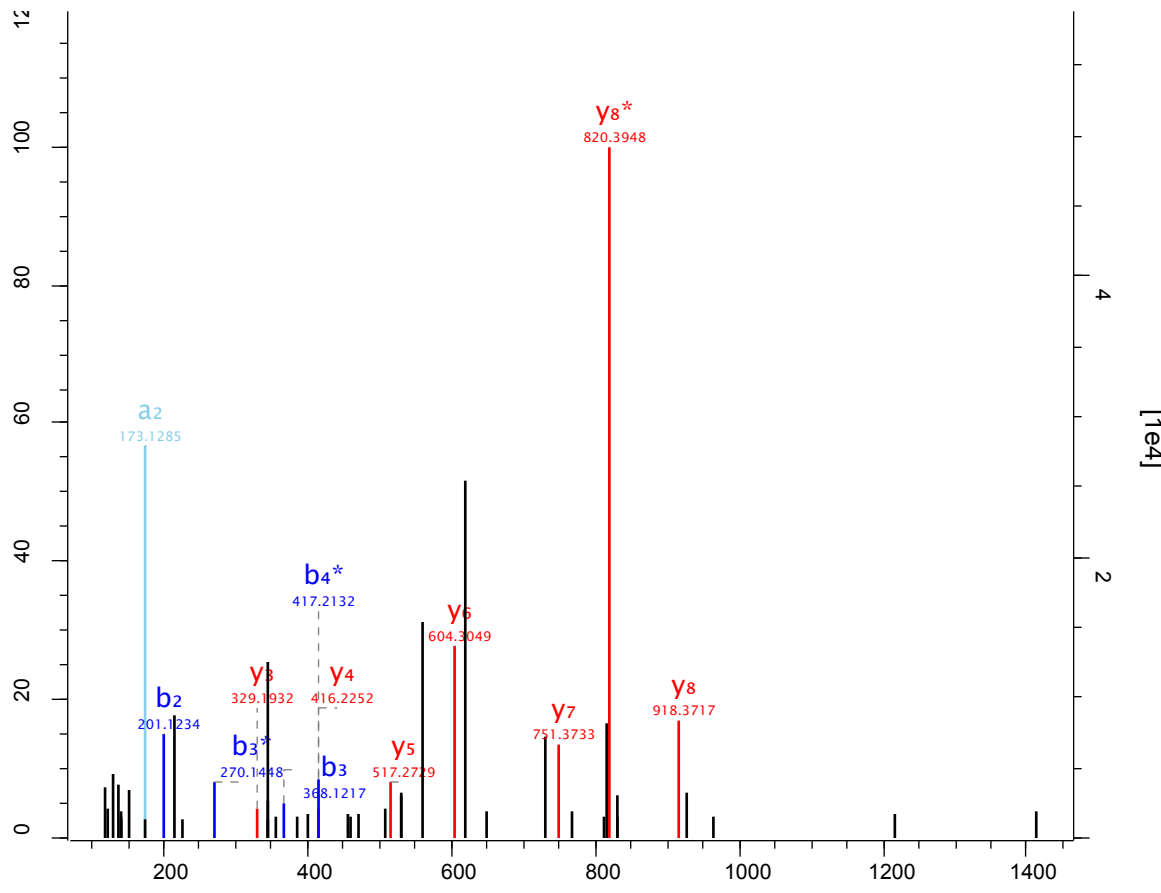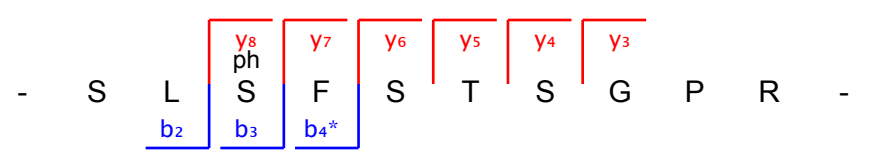

Raw file Scan Method Score m/z  
 30\_34 12243 FTMS; HCD 51.32 652.55

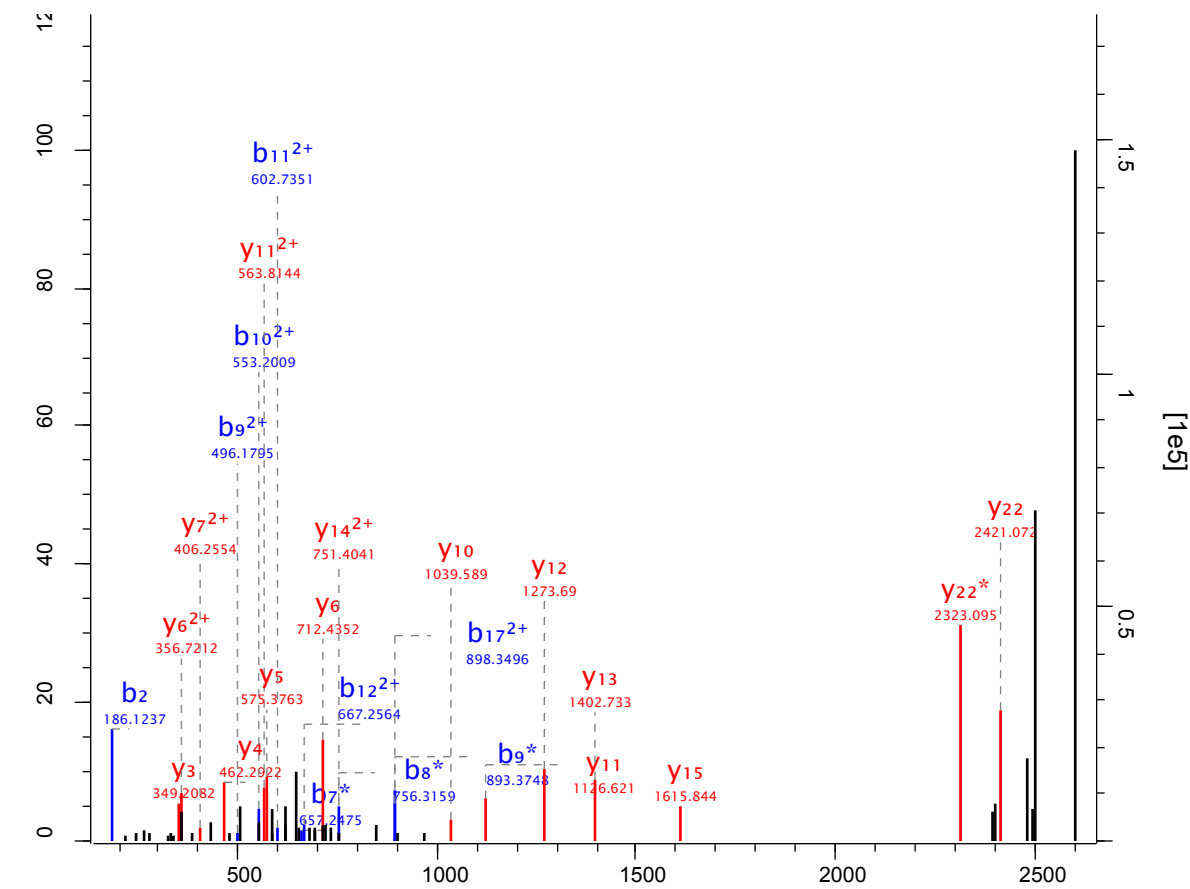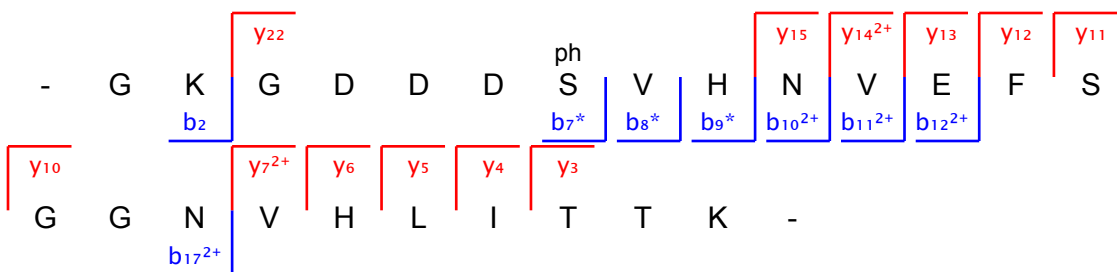

Raw file Scan Method Score m/z  
 30\_34 12256 FTMS; HCD 78.96 570.28

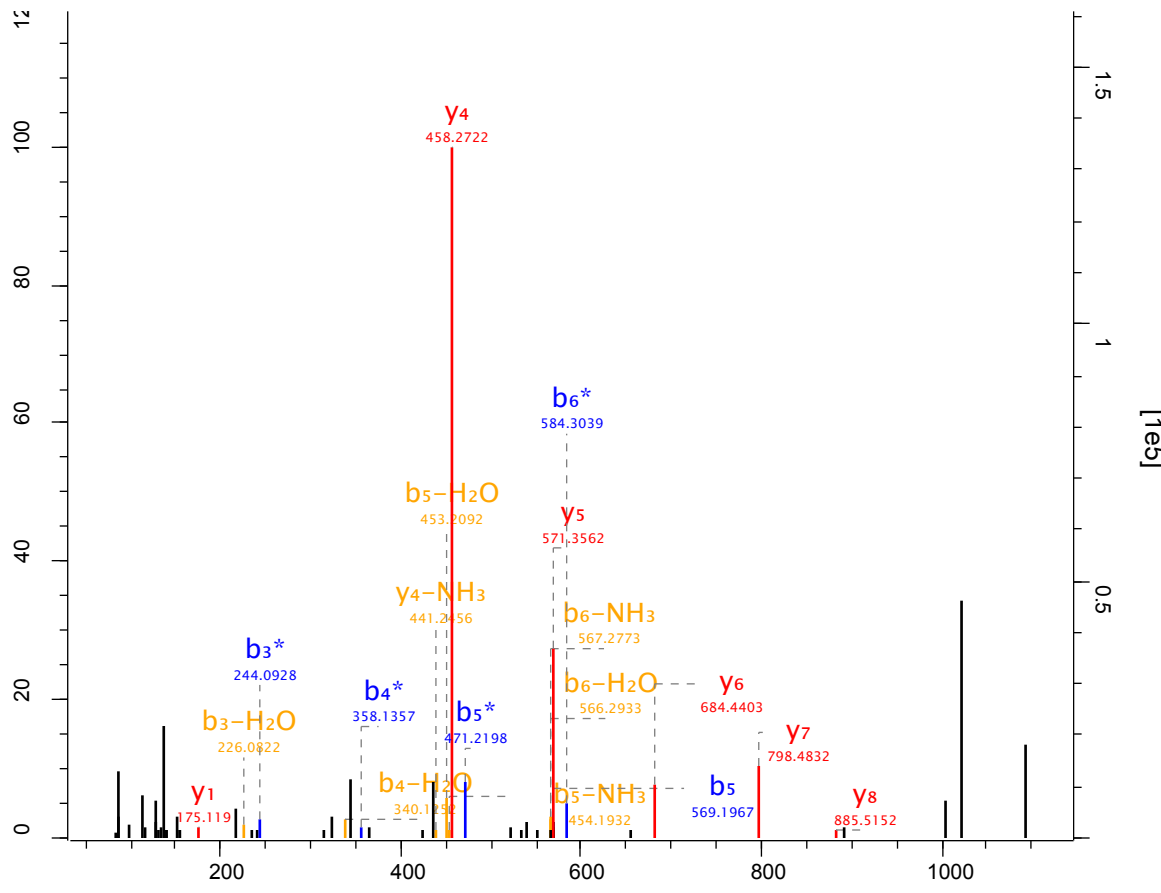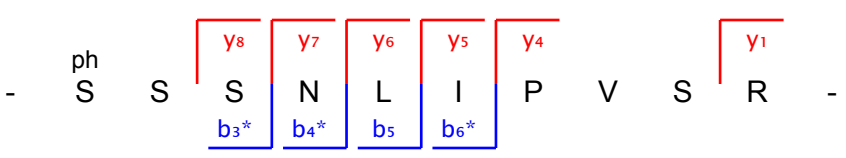





Raw file Scan Method Score m/z  
 30\_34 19574 FTMS; HCD 145.77 667.31

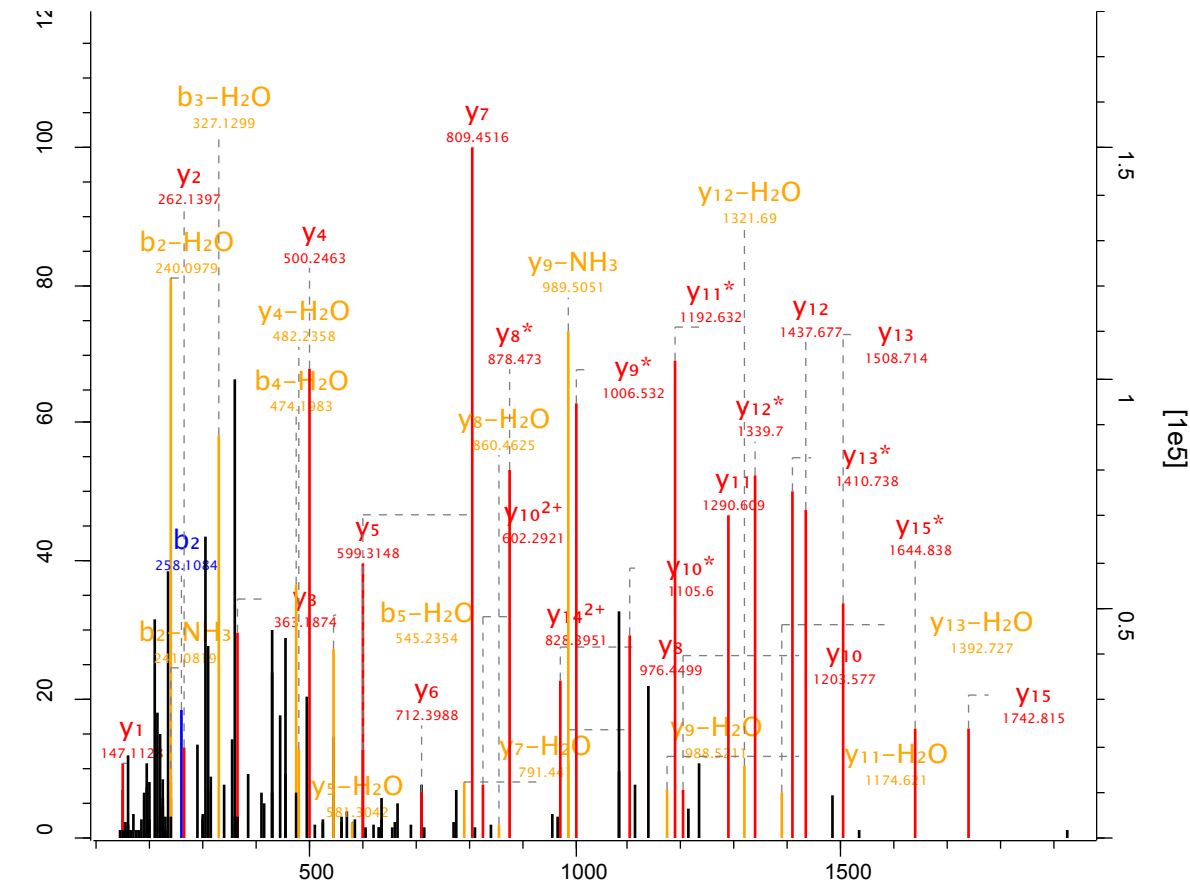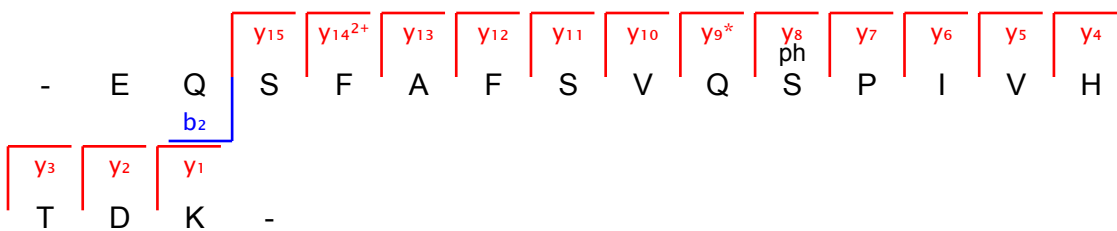

| Raw file | Scan | Method    | Score | m/z    |
|----------|------|-----------|-------|--------|
| 30_34    | 2901 | FTMS; HCD | 57.86 | 383.19 |

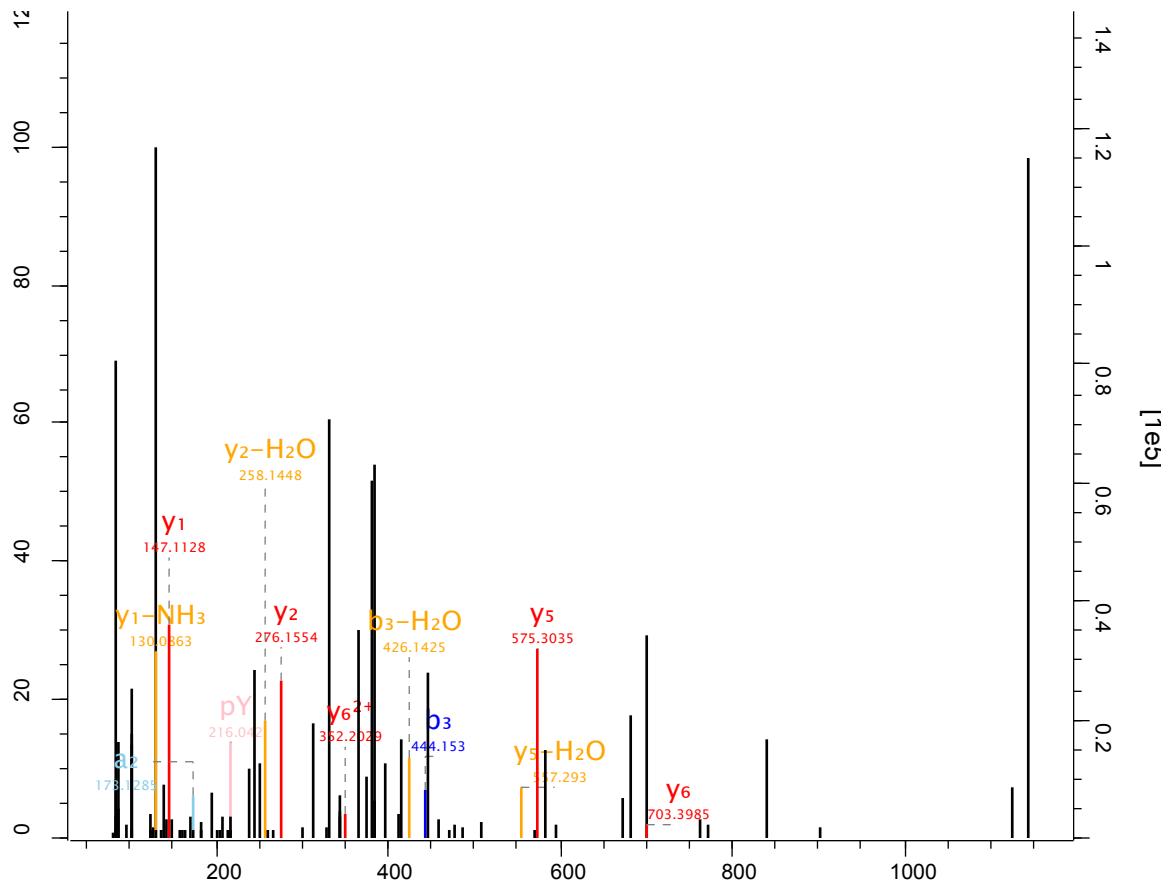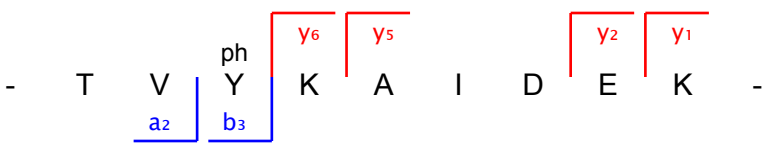

Raw file Scan Method Score m/z  
 30\_34 2938 FTMS; HCD 90.5 547.6

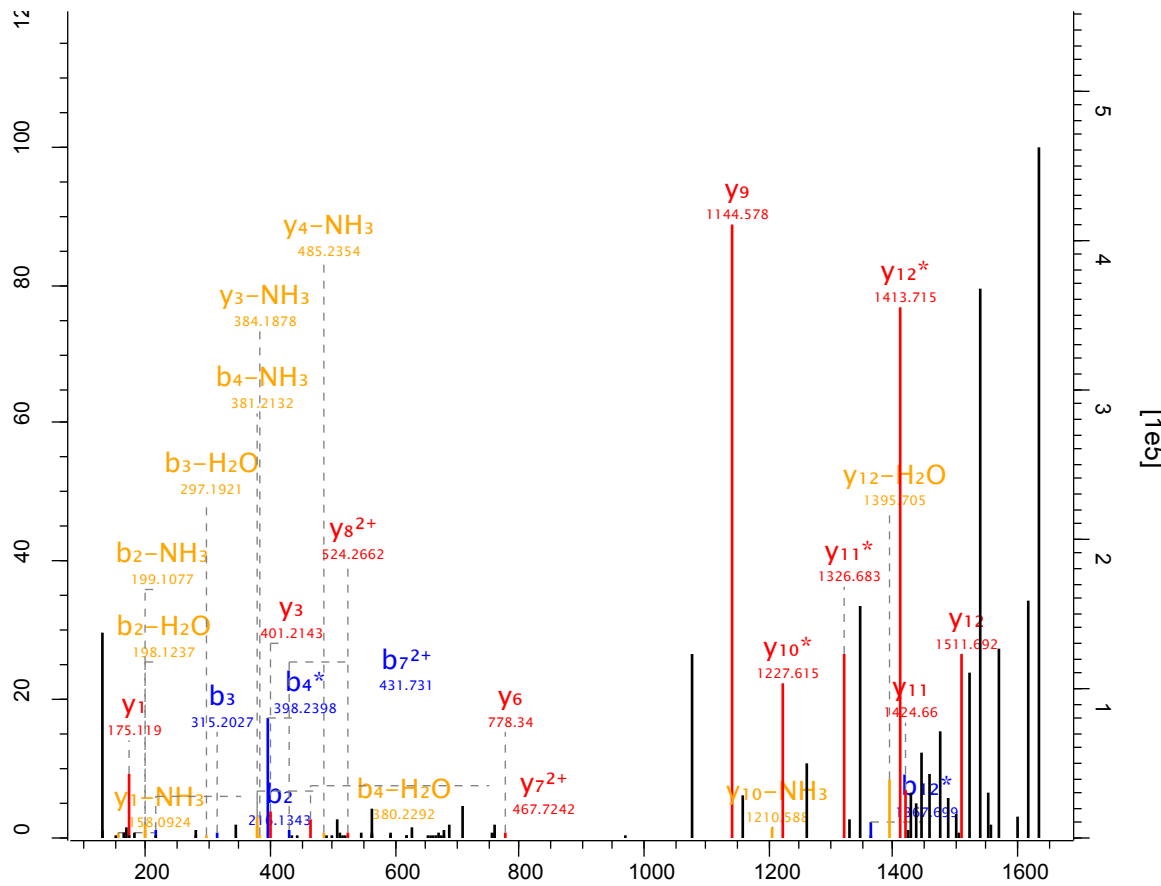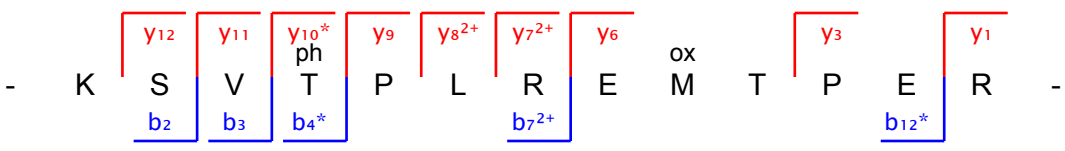

Raw file Scan Method Score m/z  
 30\_34 2943 FTMS; HCD 77.55 602.56

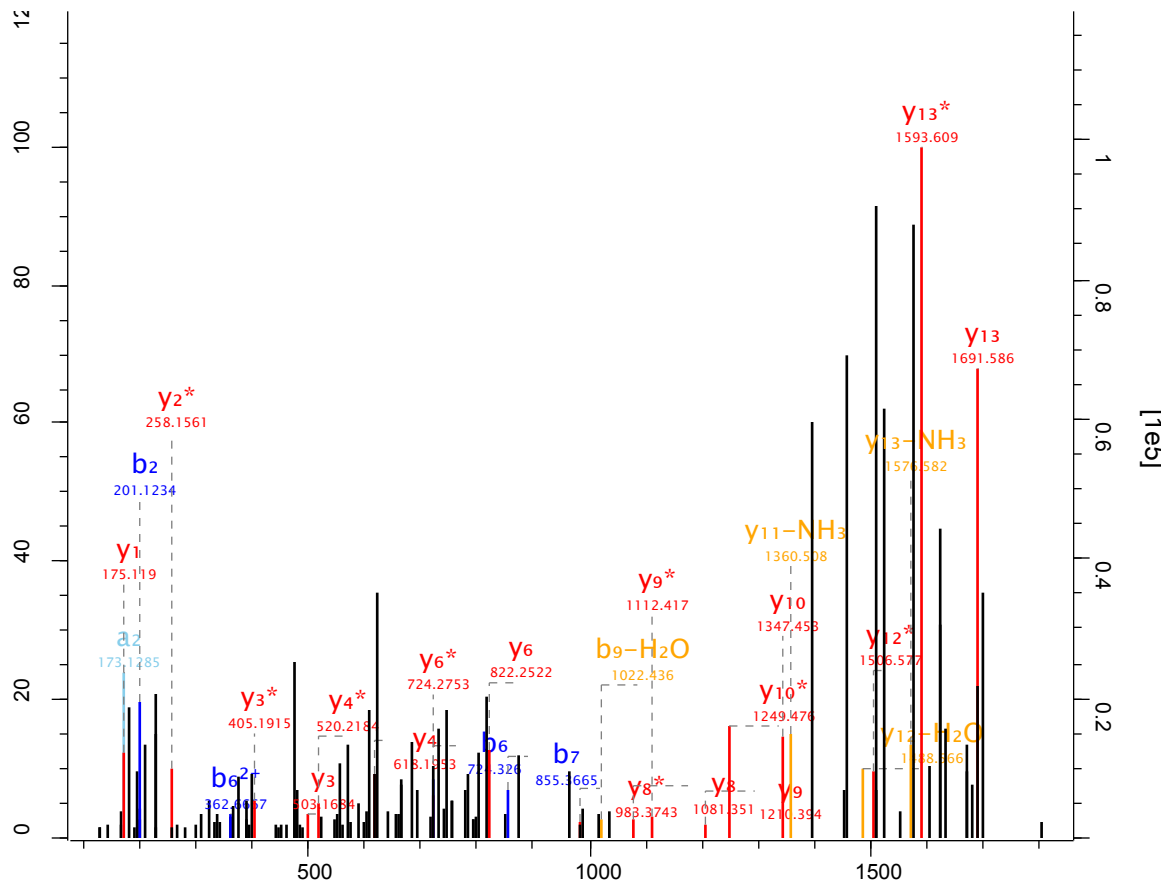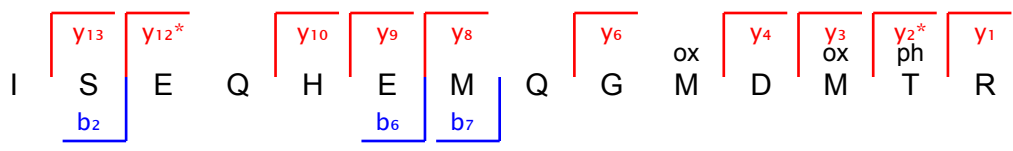

Raw file Scan Method Score m/z  
 30\_34 2989 FTMS; HCD 41.11 753.29

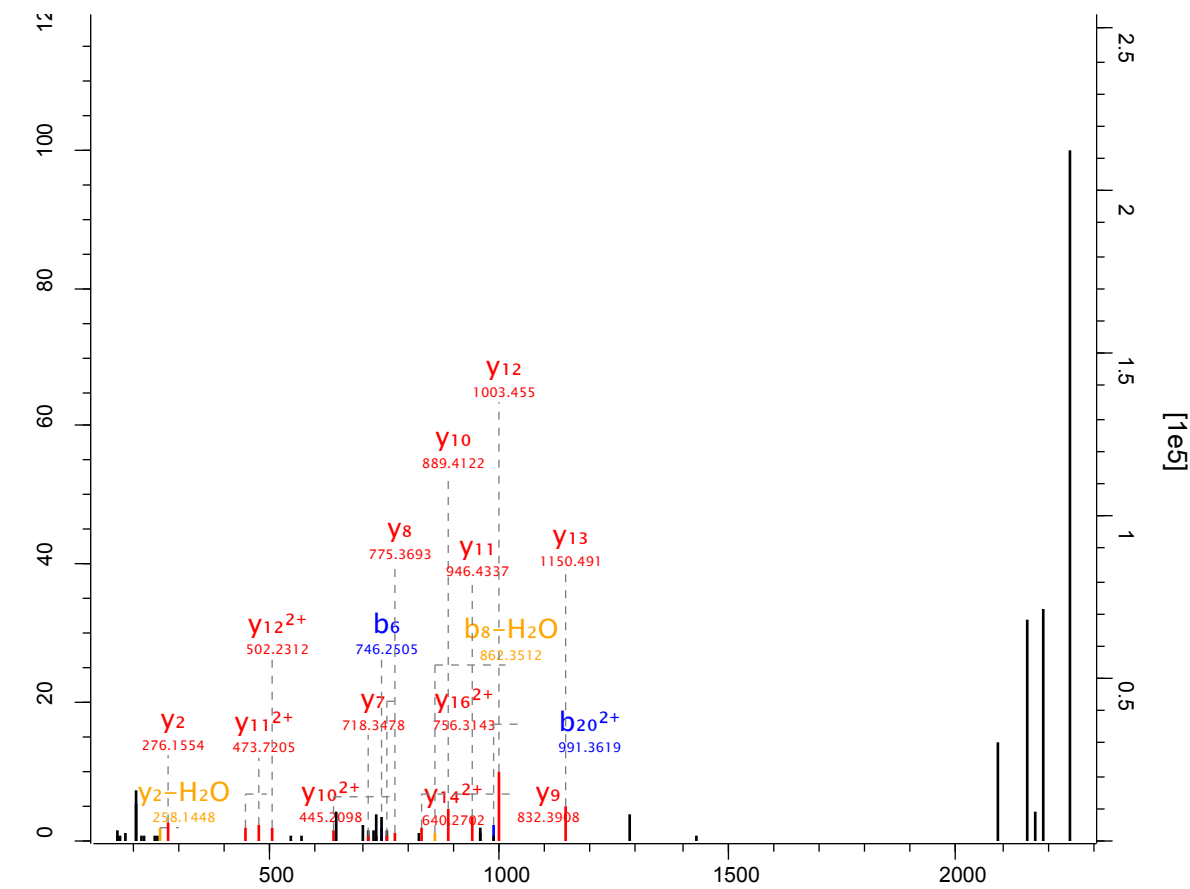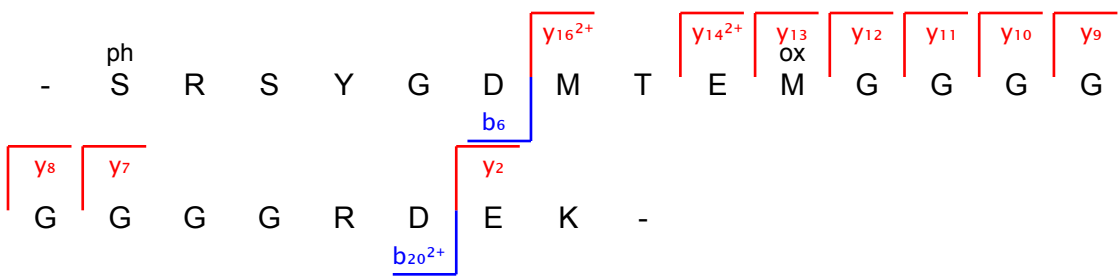

Raw file Scan Method Score m/z  
 30\_34 30985 FTMS; HCD 48.53 617.27

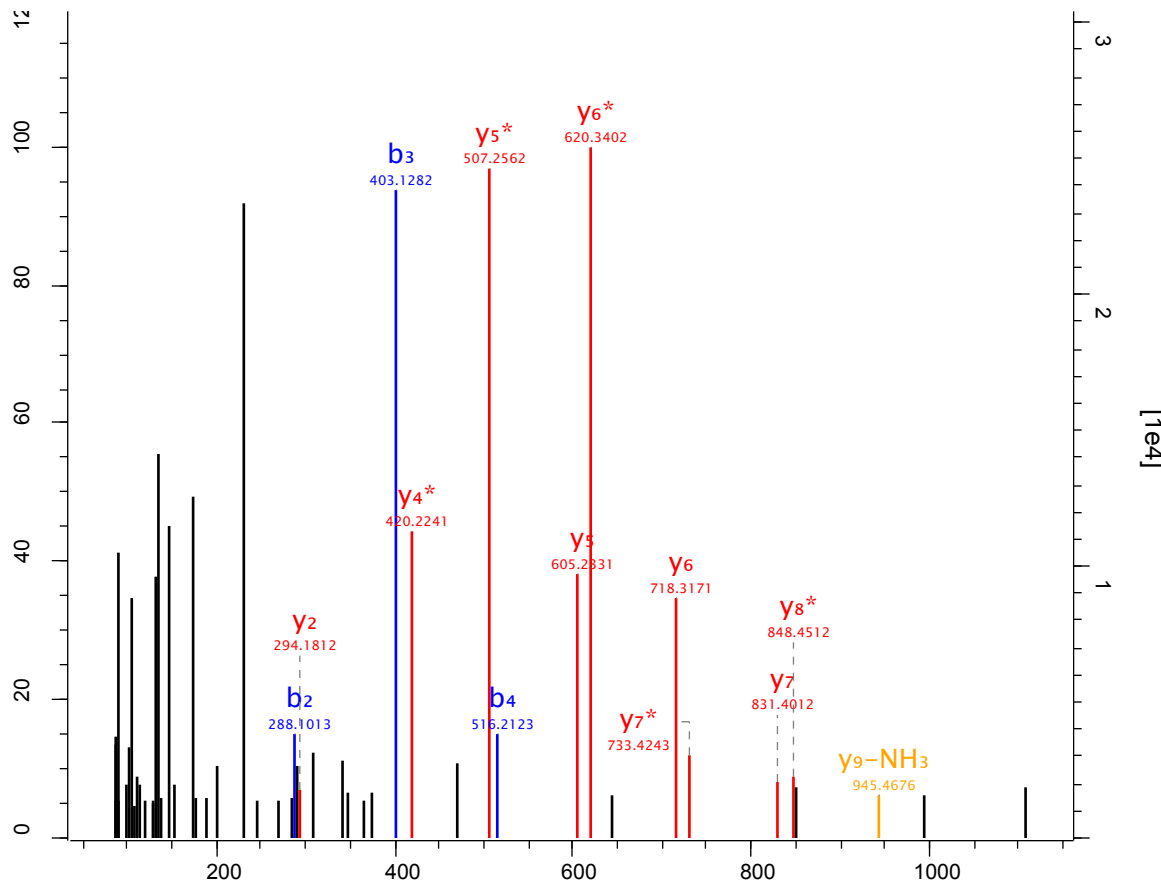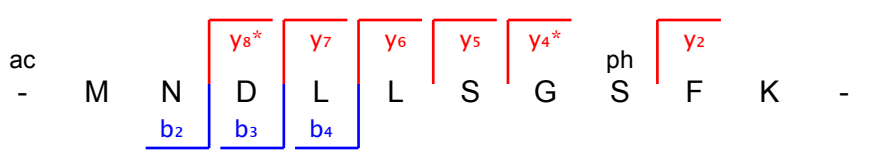

Raw file Scan Method Score m/z  
 30\_34 32501 FTMS; HCD 68.04 706.78

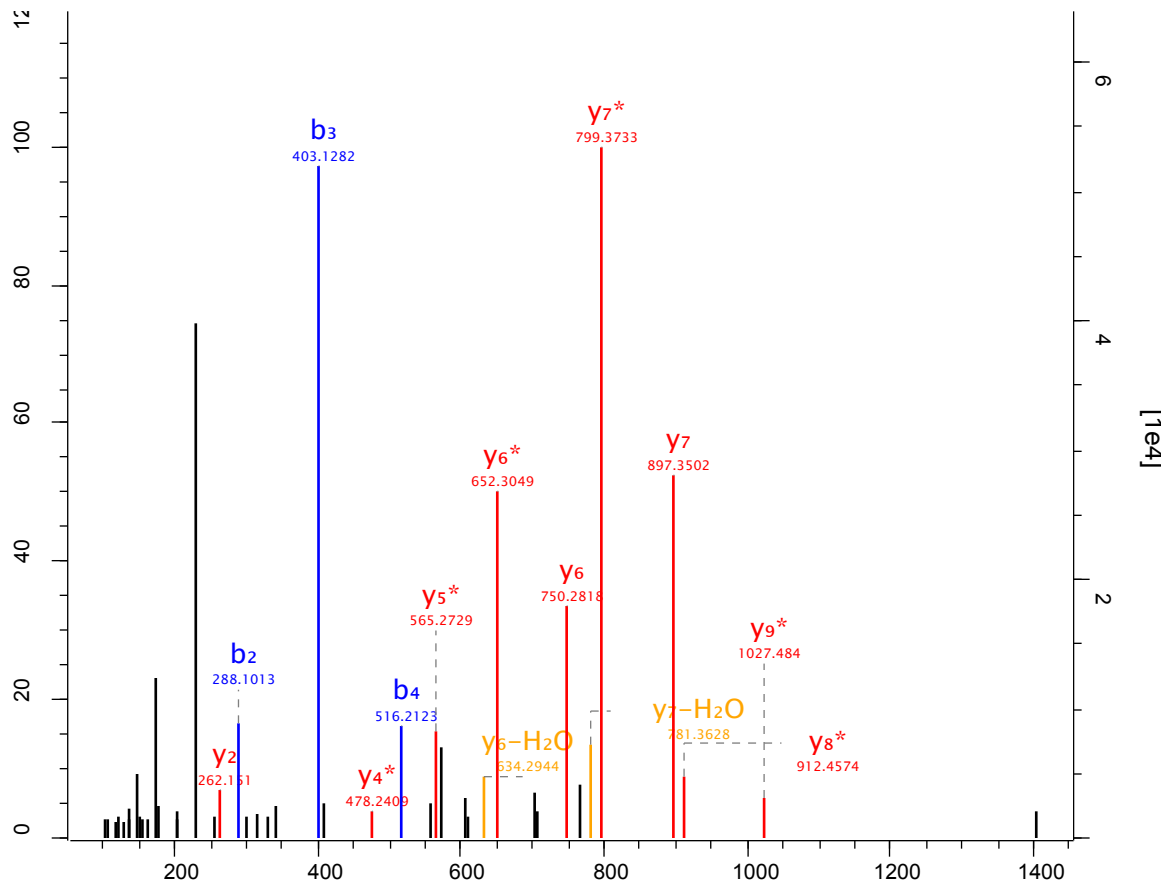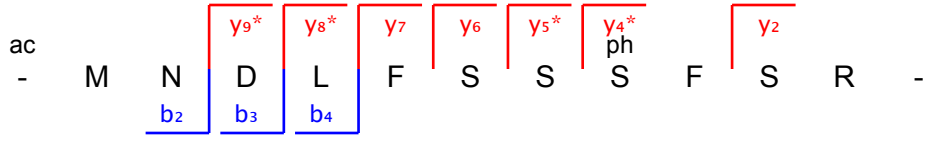

Raw file Scan Method Score m/z  
 30\_34 3425 FTMS; HCD 45.22 497.59

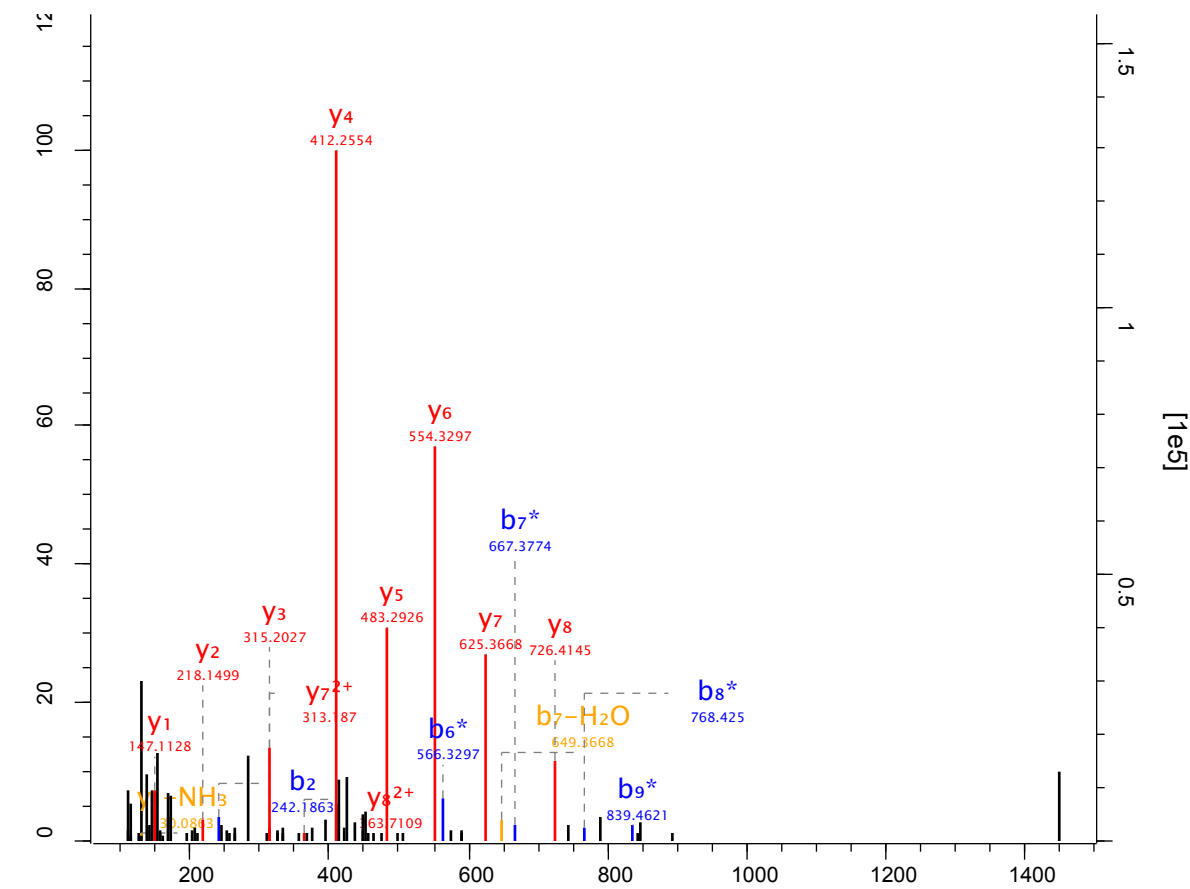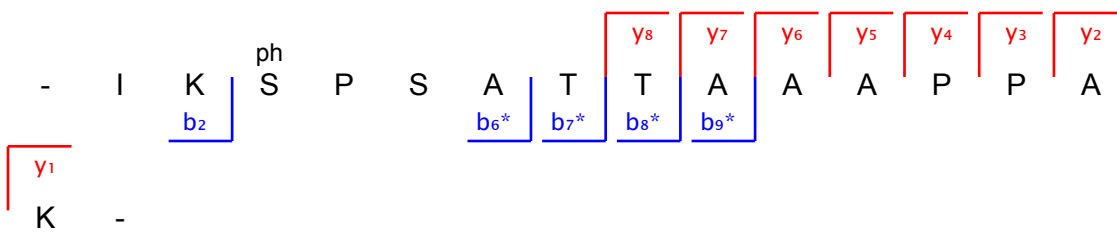



Raw file Scan Method Score m/z  
 30\_34 3693 FTMS; HCD 62.29 412.86

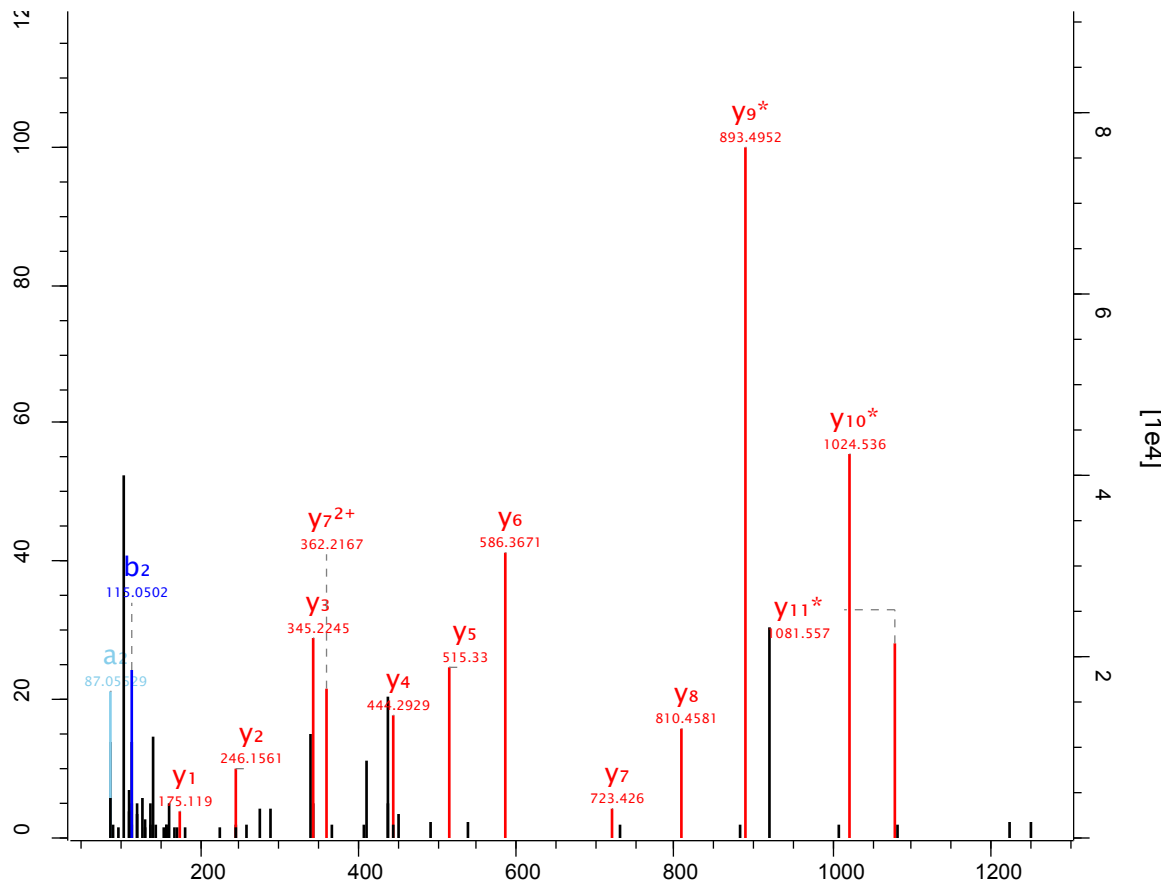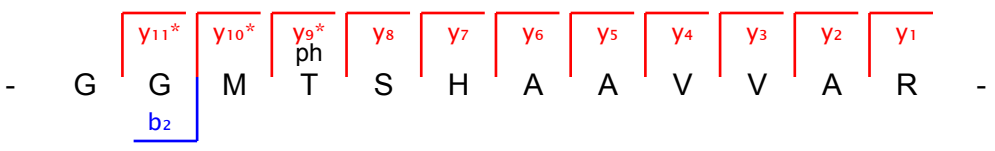

Raw file Scan Method Score m/z  
 30\_34 3819 FTMS; HCD 73.83 493.88

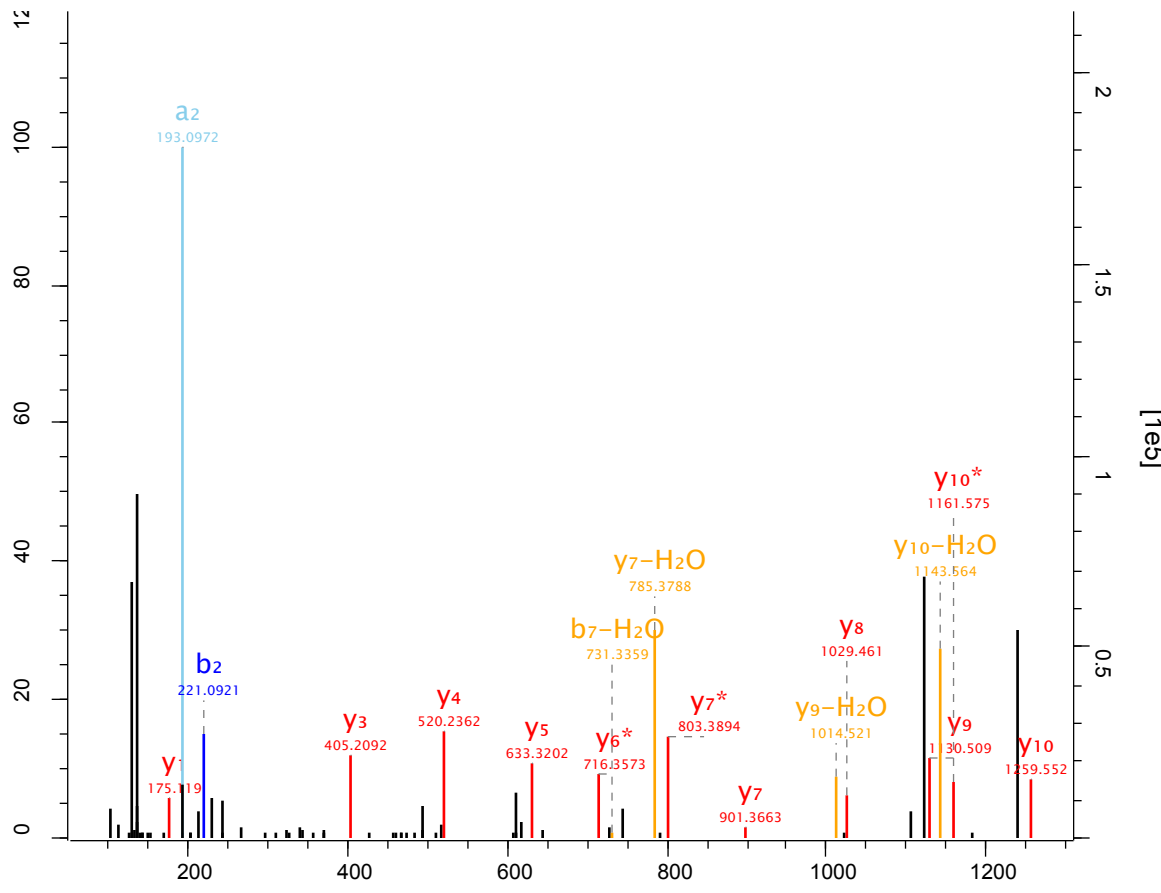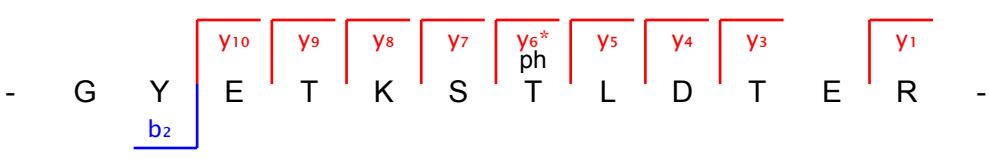

| Raw file | Scan | Method    | Score | m/z    |
|----------|------|-----------|-------|--------|
| 30_34    | 3839 | FTMS; HCD | 49.77 | 578.26 |

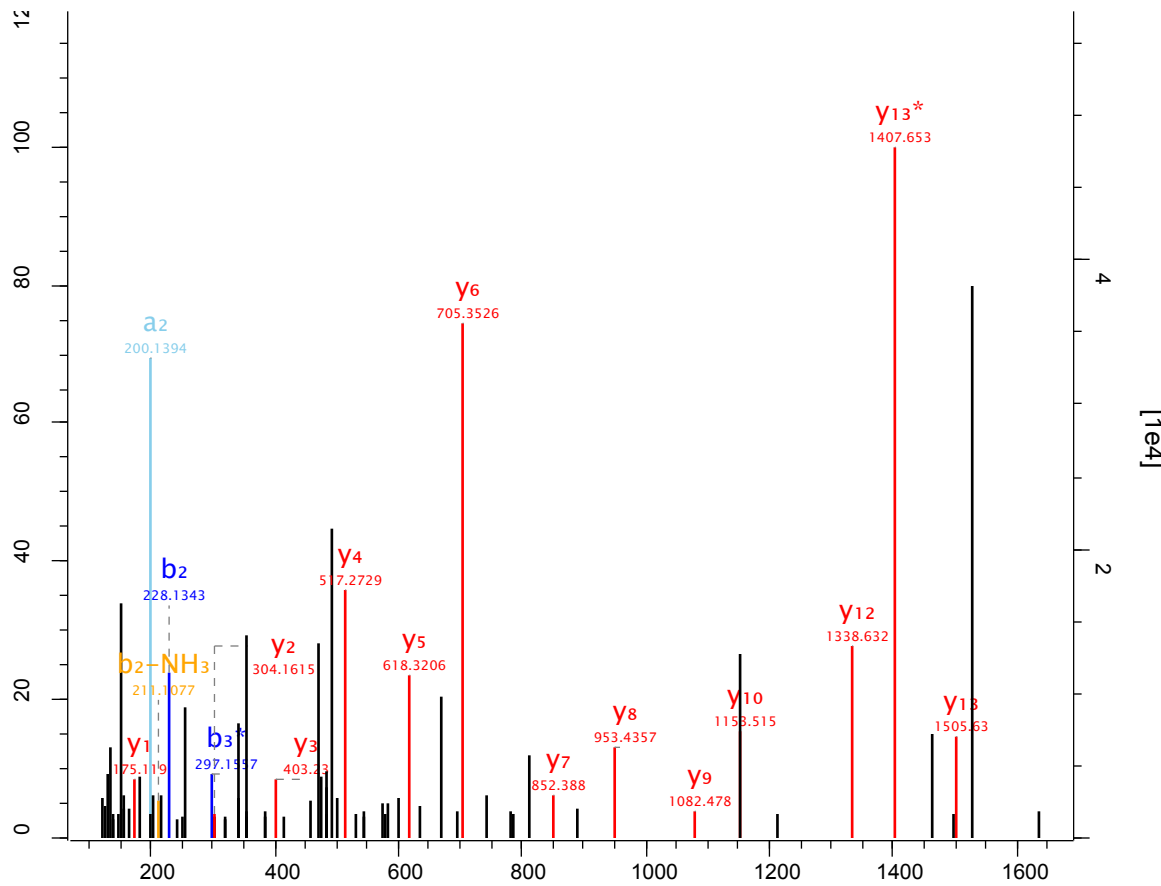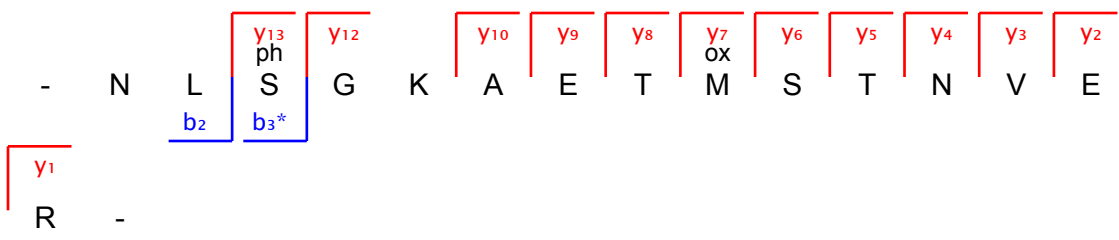

Raw file Scan Method Score m/z  
 30\_34 4095 FTMS; HCD 53.98 551.28

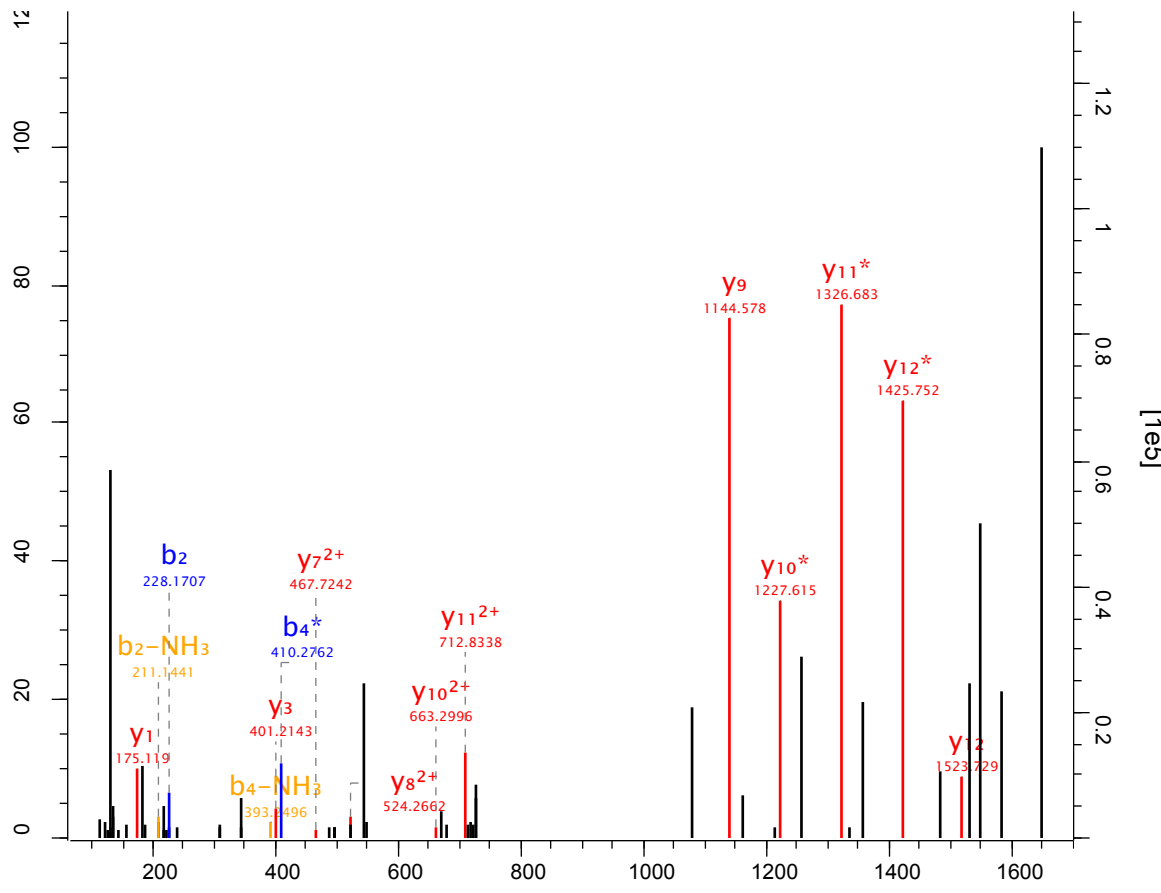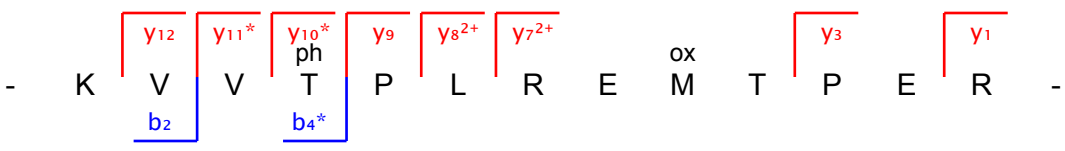

Raw file Scan Method Score m/z  
 30\_34 4717 FTMS; HCD 45.88 499.57

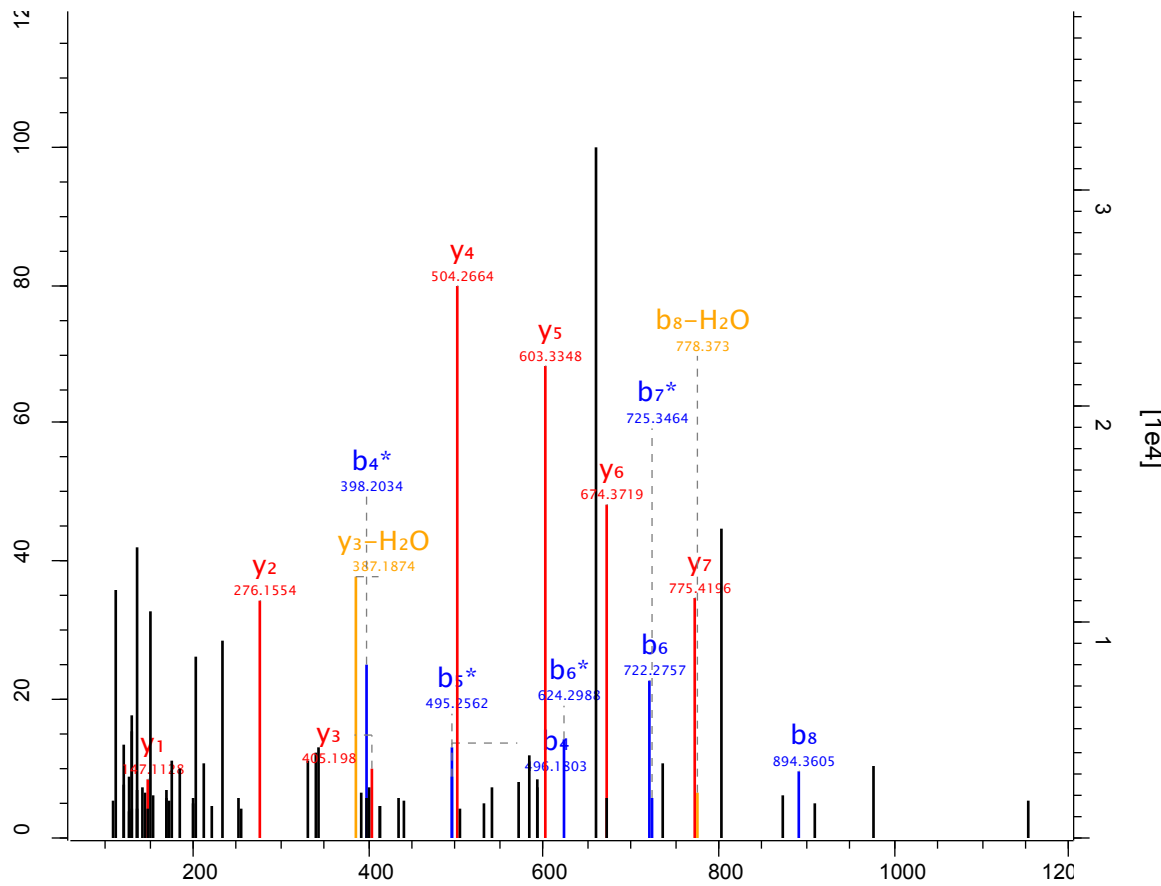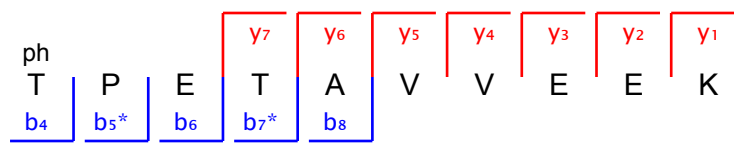

Raw file Scan Method Score m/z  
 30\_34 4878 FTMS; HCD 66.37 717.33

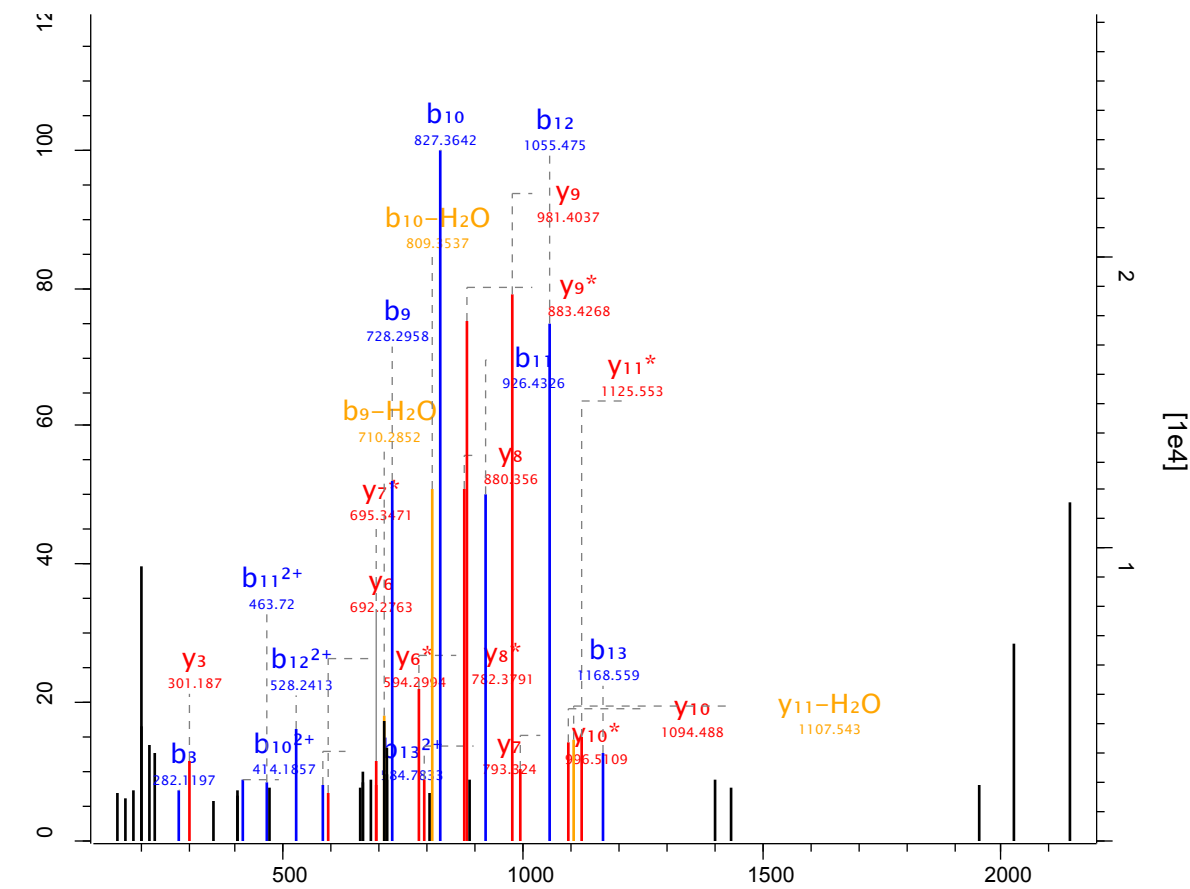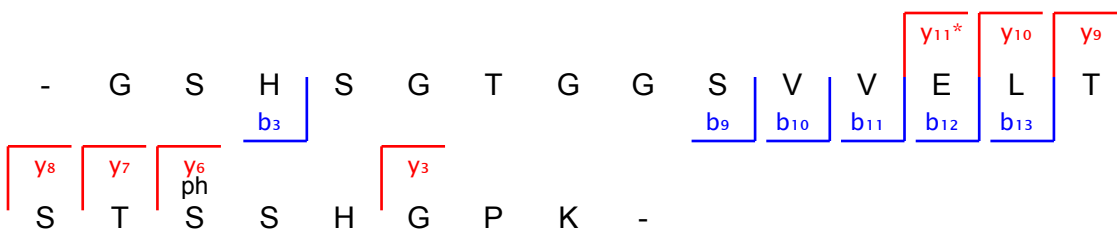

| Raw file | Scan | Method    | Score | m/z    |
|----------|------|-----------|-------|--------|
| 30_34    | 5878 | FTMS; HCD | 49.33 | 426.89 |

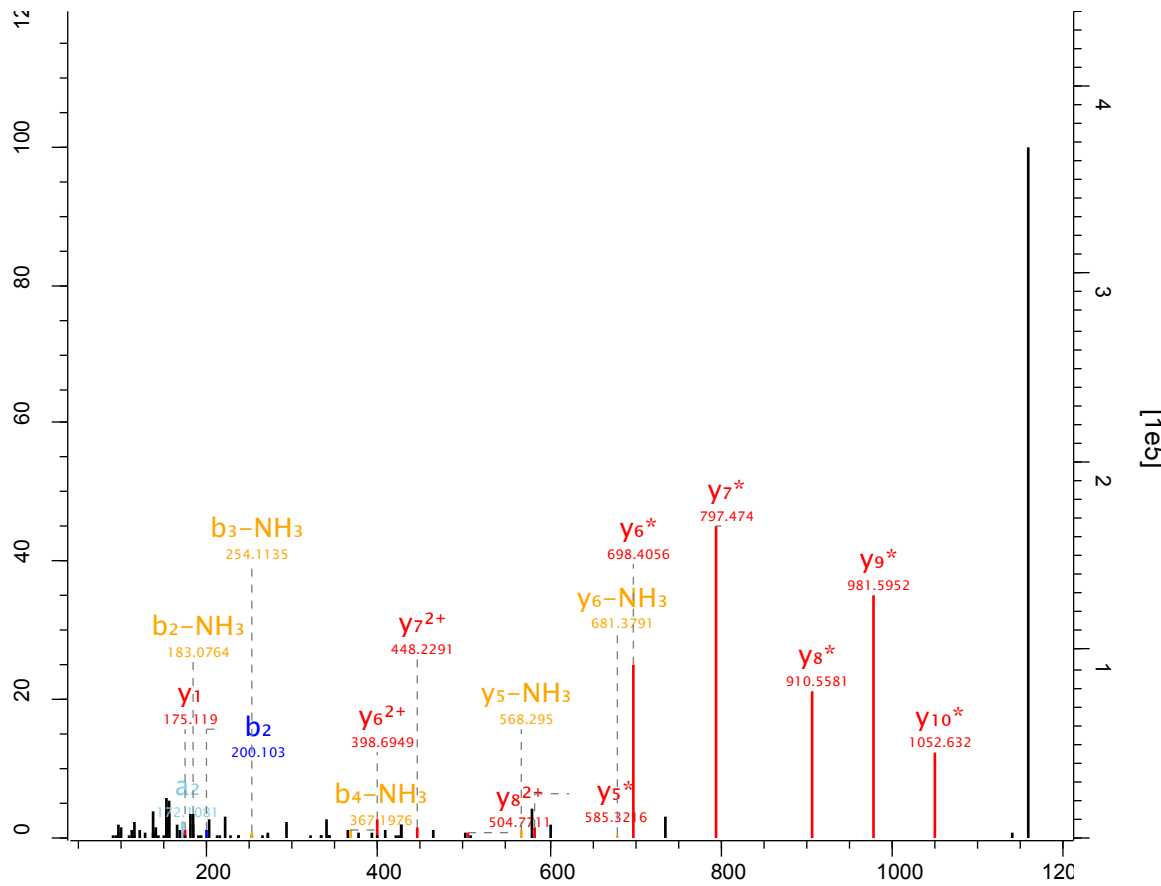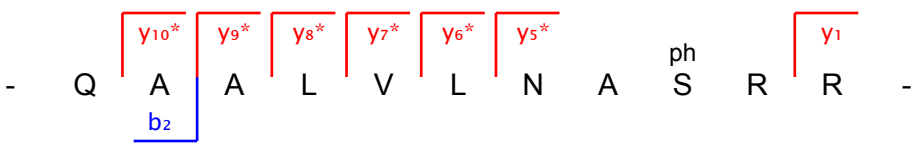

| Raw file | Scan | Method    | Score | m/z    |
|----------|------|-----------|-------|--------|
| 30_34    | 6835 | FTMS; HCD | 43.79 | 539.92 |

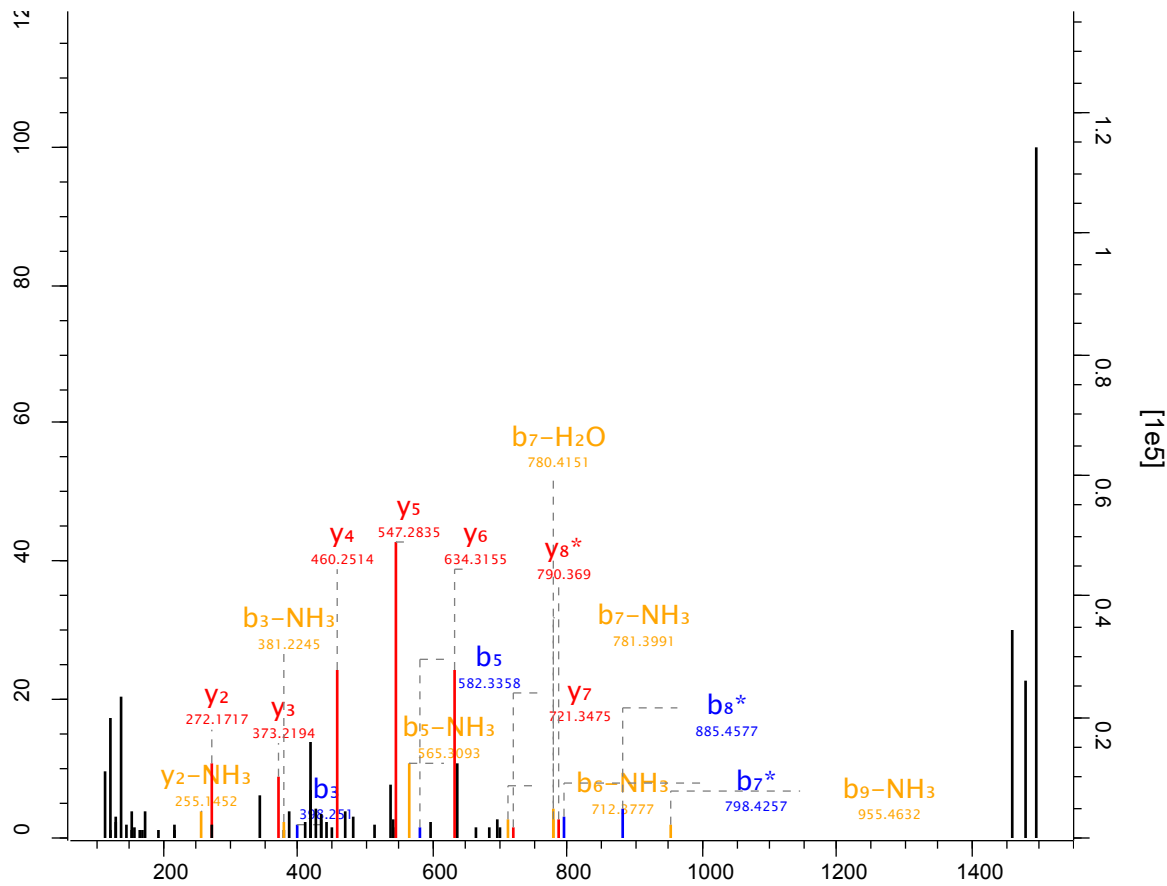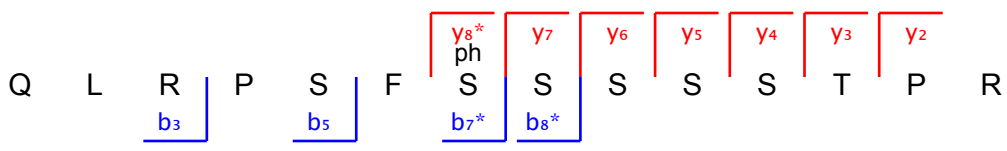



Raw file Scan Method Score m/z  
 30\_34 6872 FTMS; HCD 75.32 461.88

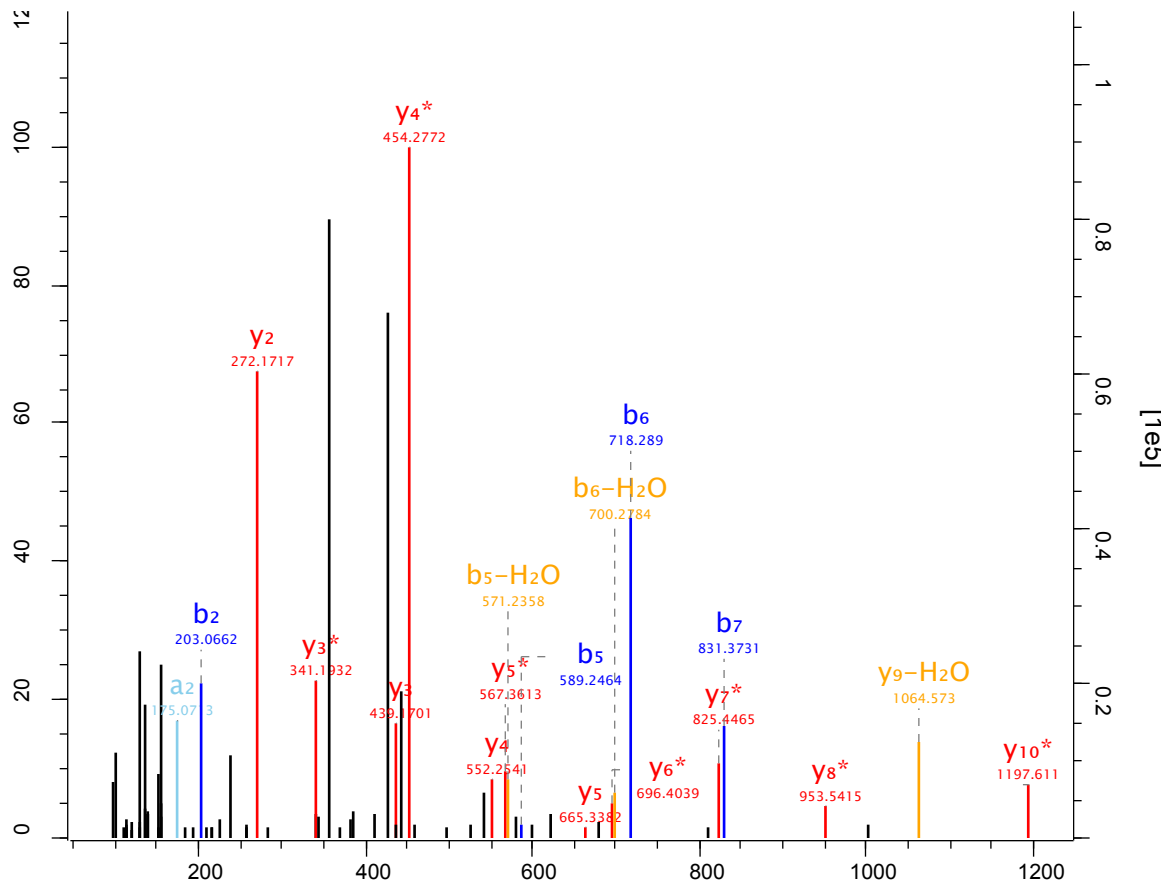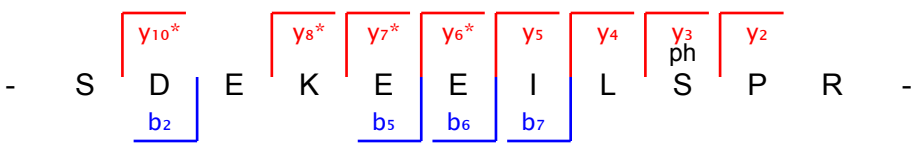

Raw file Scan Method Score m/z  
 30\_34 7225 FTMS; HCD 101.05 739.86

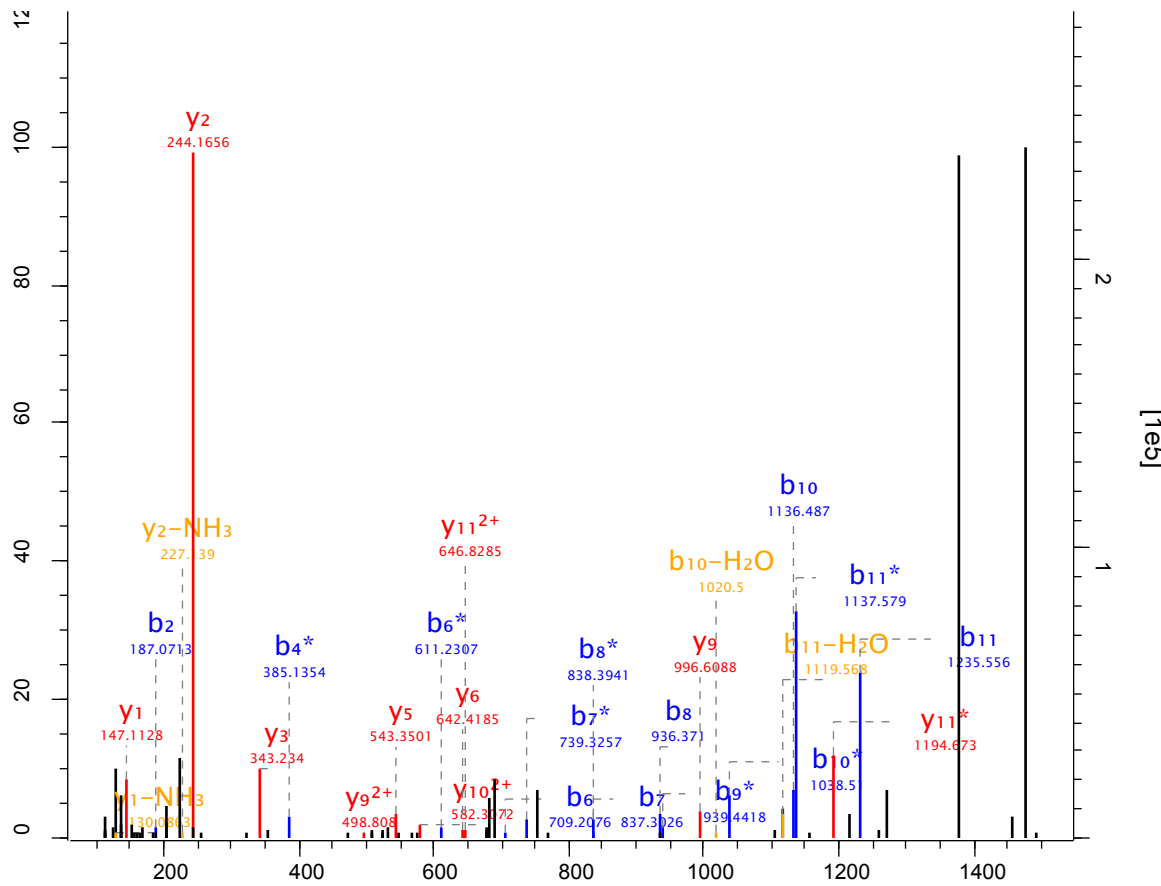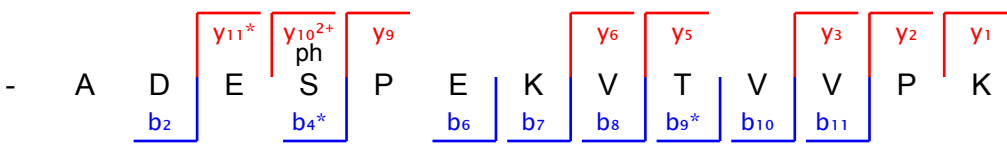

Raw file Scan Method Score m/z  
 30\_34 7279 FTMS; HCD 90.76 466.89

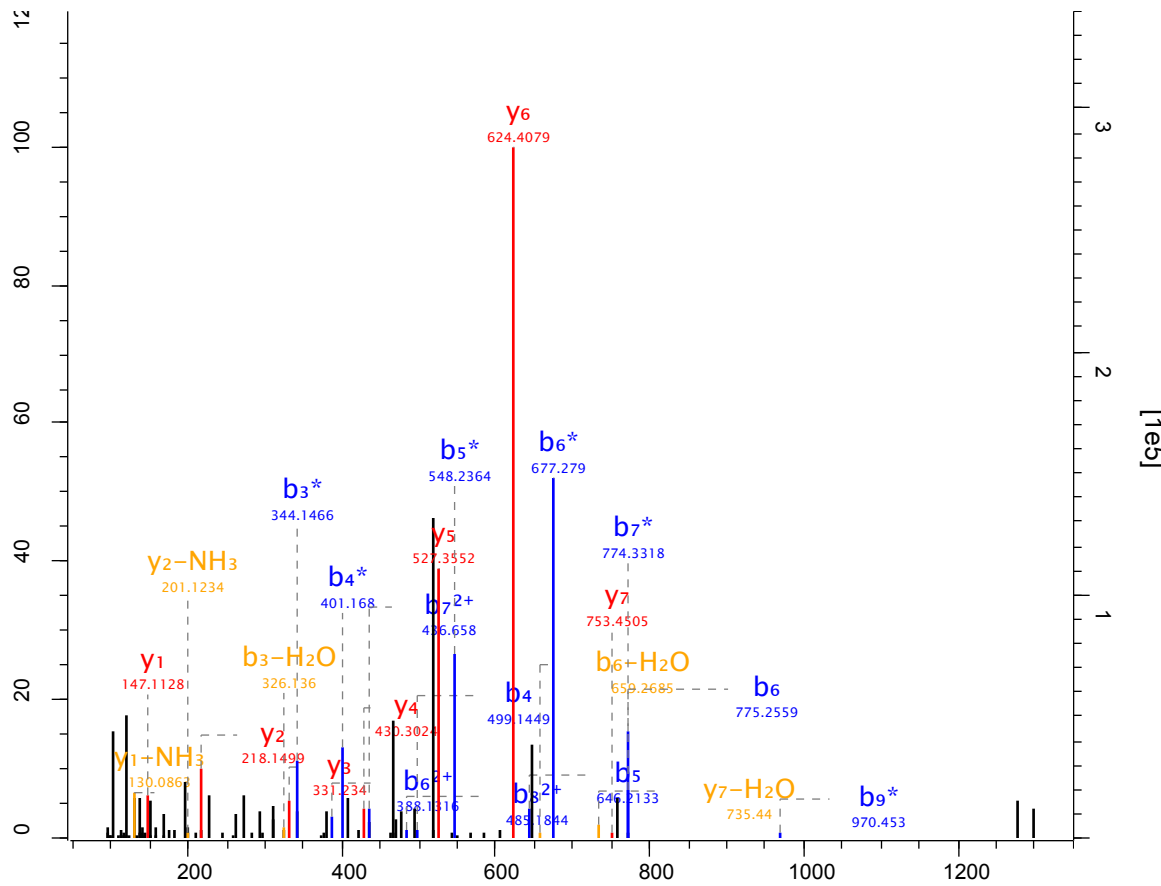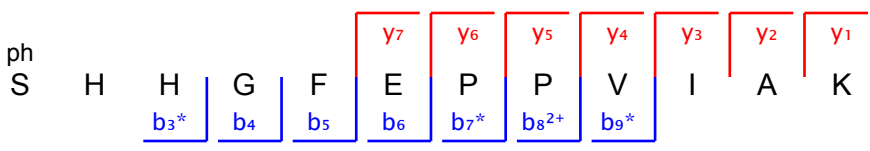

Raw file Scan Method Score m/z  
 30\_34 7484 FTMS; HCD 55.01 625.29

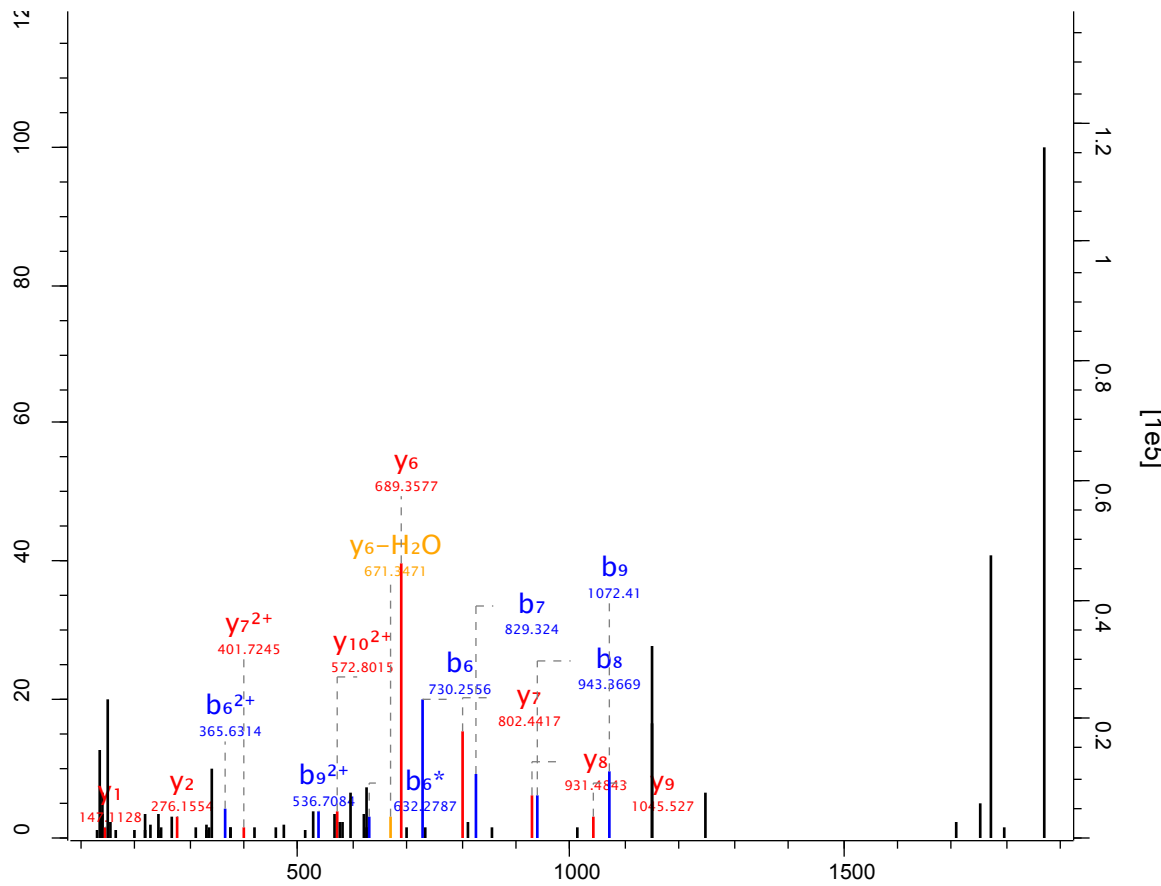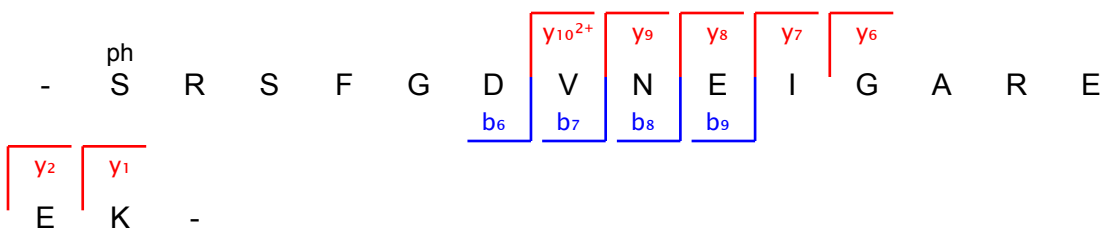

| Raw file | Scan | Method    | Score | m/z   |
|----------|------|-----------|-------|-------|
| 30_34    | 8013 | FTMS; HCD | 87.26 | 436.7 |

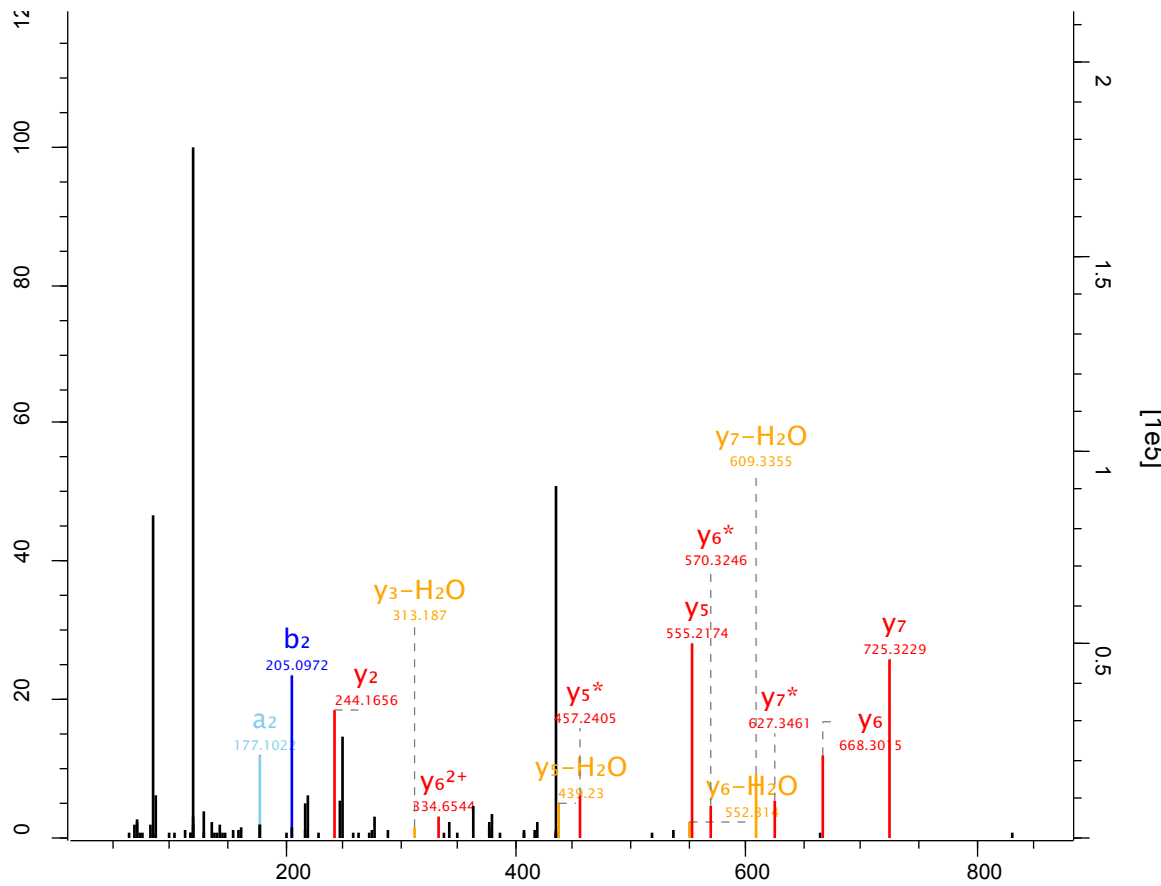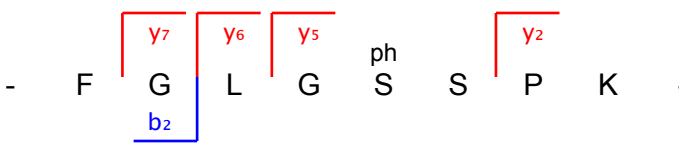



| Raw file | Scan | Method    | Score | m/z    |
|----------|------|-----------|-------|--------|
| 30_34    | 8746 | FTMS; HCD | 49.71 | 591.56 |

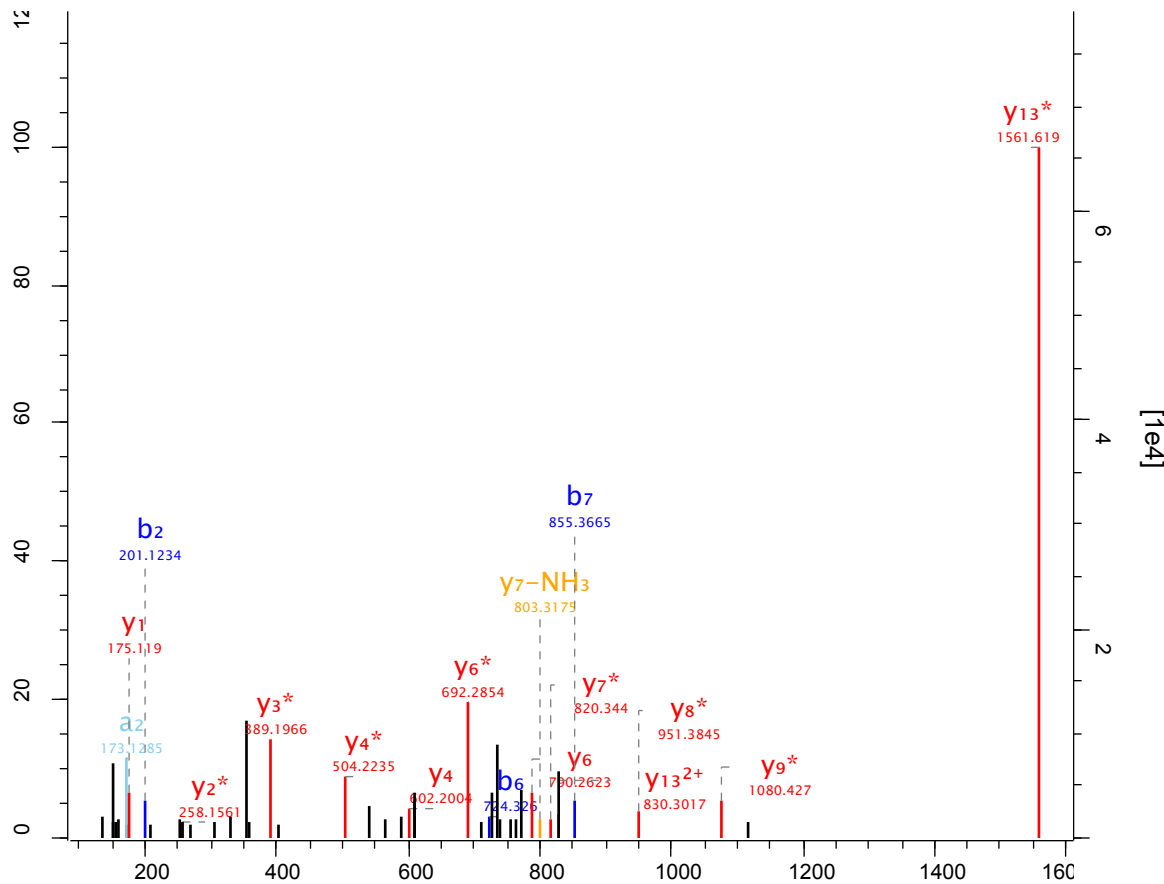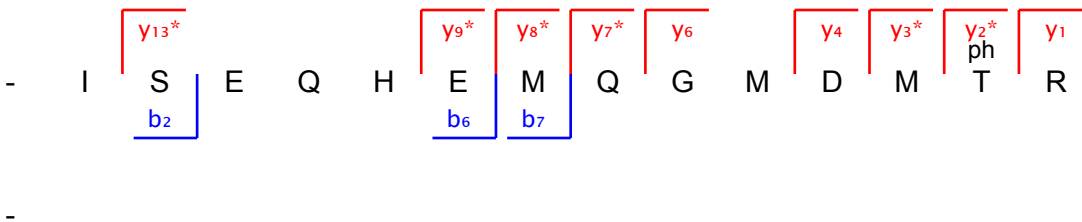

| Raw file | Scan | Method    | Score | m/z    |
|----------|------|-----------|-------|--------|
| 30_34    | 9573 | FTMS; HCD | 48.4  | 532.58 |

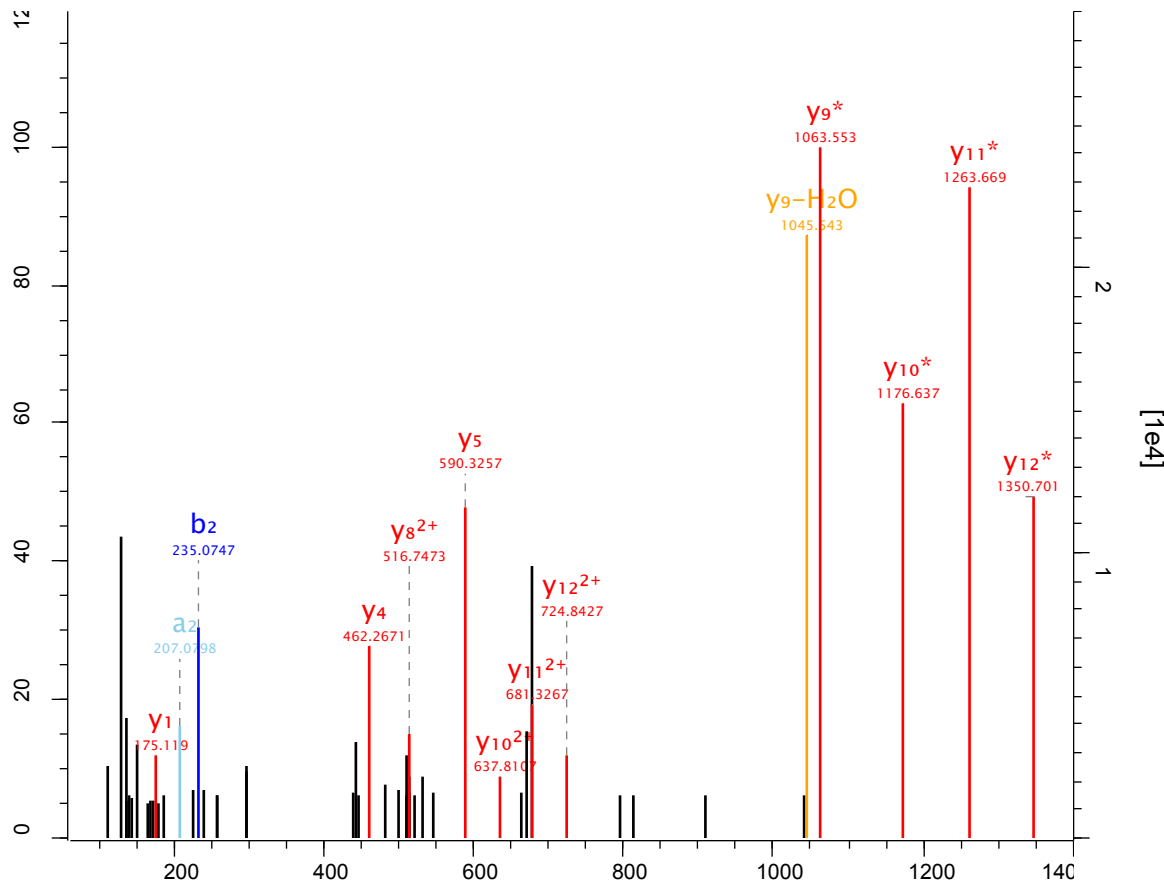

ox M y<sub>12</sub><sup>\*</sup> y<sub>11</sub><sup>\*</sup> y<sub>10</sub><sup>\*</sup> y<sub>9</sub><sup>\*</sup> y<sub>8</sub><sup>2+</sup> ph S F K y<sub>5</sub> y<sub>4</sub> S S L y<sub>1</sub> R -

b<sub>2</sub>



Raw file Scan Method Score m/z  
 30\_34 9660 FTMS; HCD 121.03 496.56

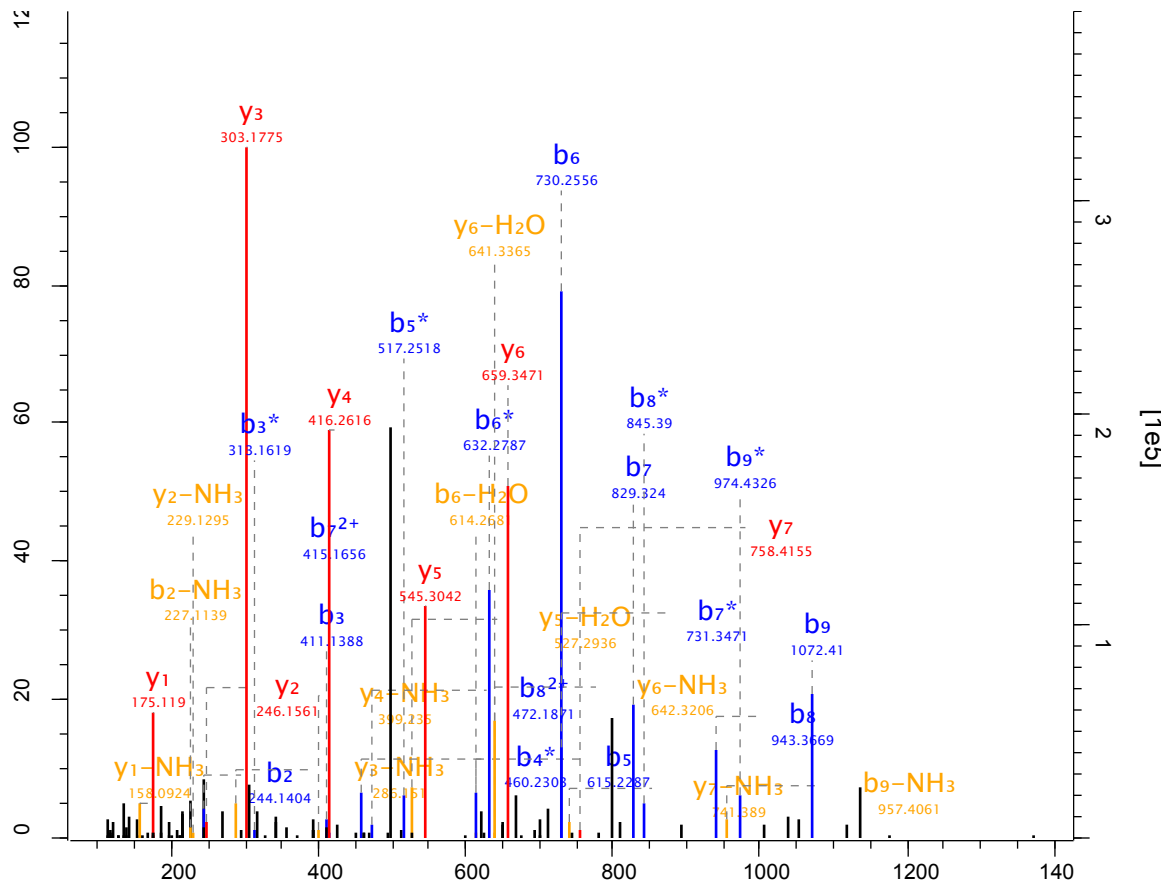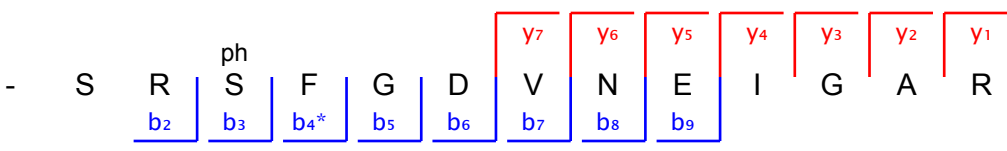

Raw file Scan Method Score m/z  
 30\_34 9682 FTMS; HCD 99.41 877.85

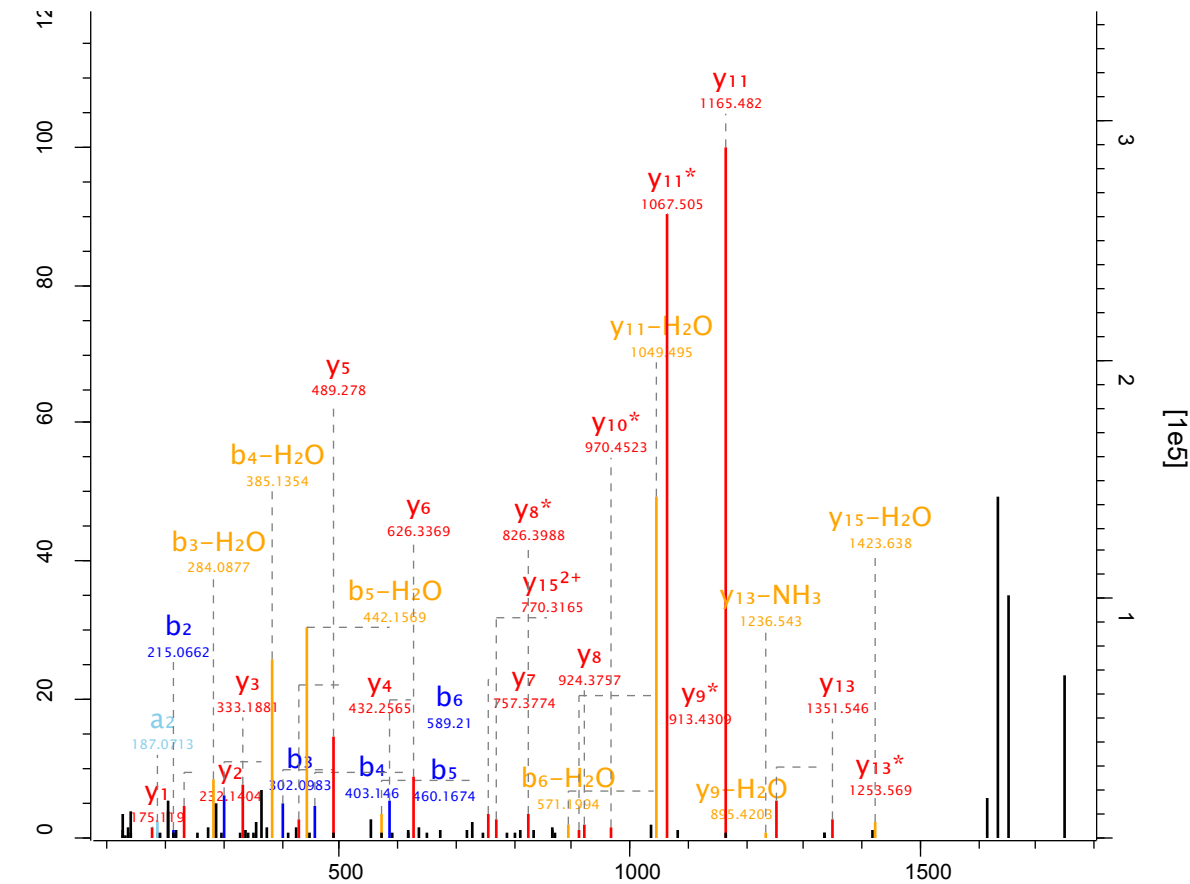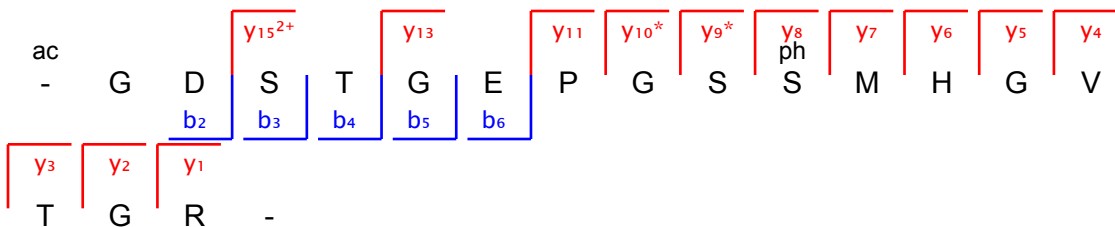

| Raw file | Scan | Method    | Score | m/z   |
|----------|------|-----------|-------|-------|
| 30_34    | 9842 | FTMS; HCD | 76.22 | 452.2 |

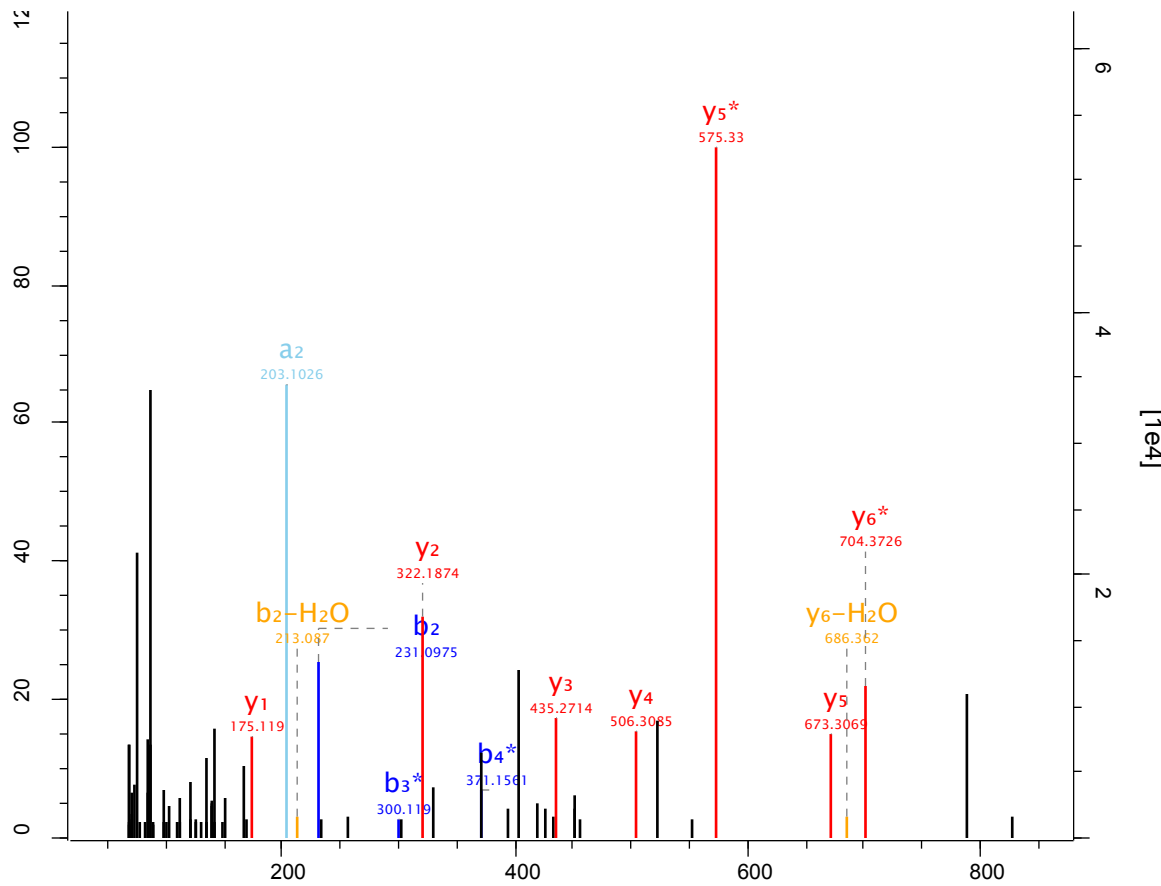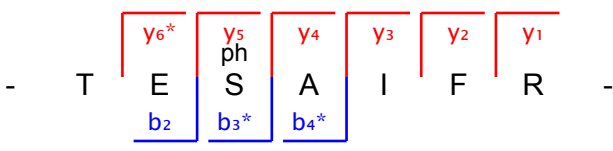

Raw file Scan Method Score m/z  
 34\_38 10571 FTMS; HCD 66.22 657.29

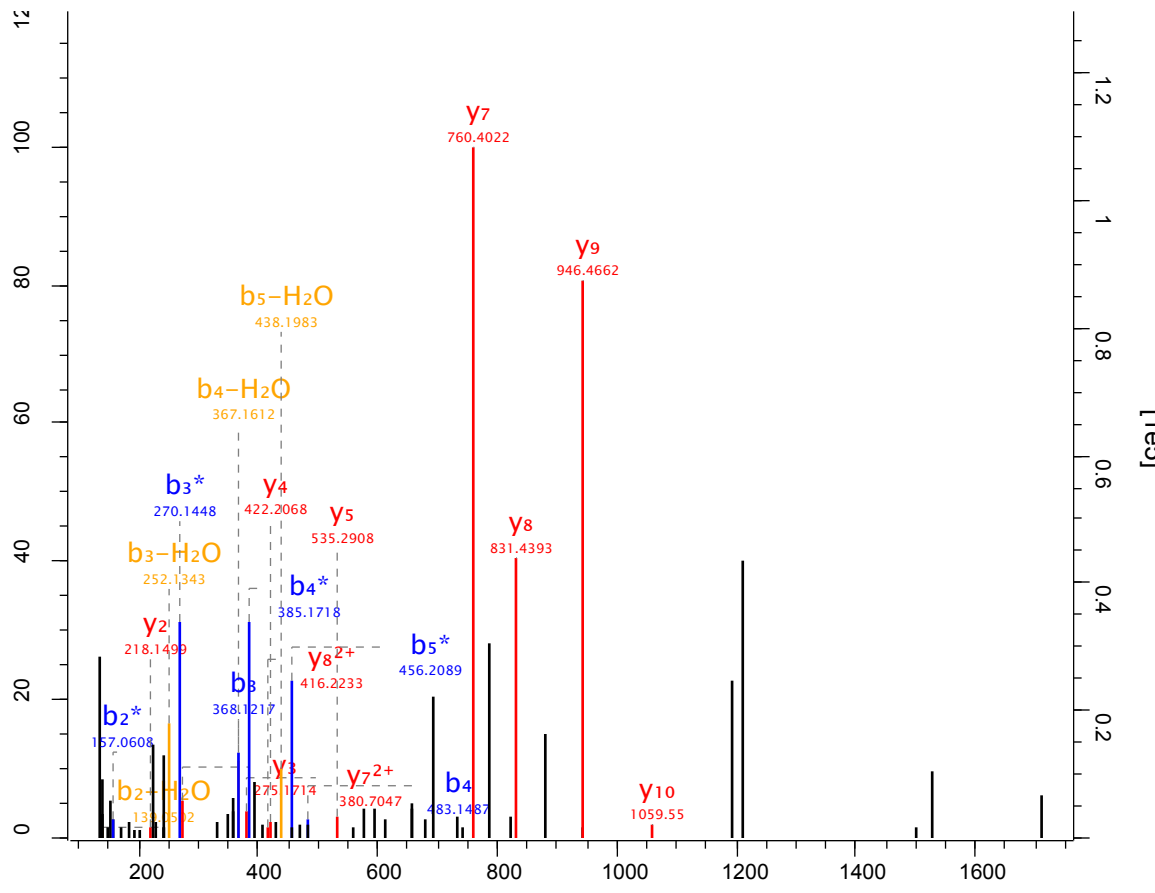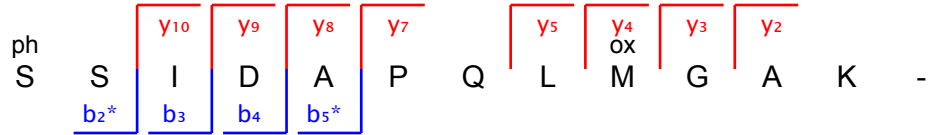

Raw file Scan Method Score m/z  
 34\_38 11378 FTMS; HCD 82.87 641.27

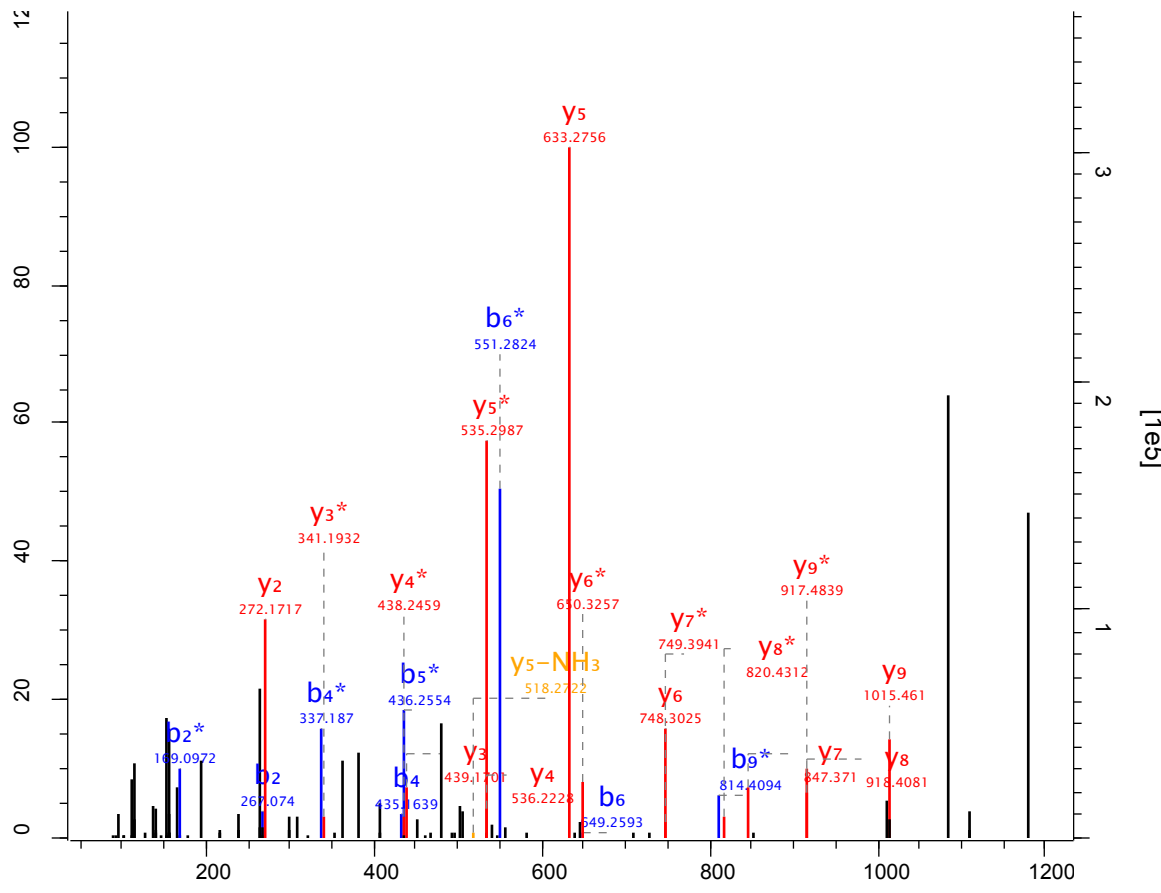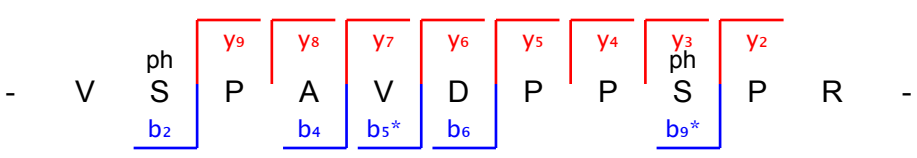

Raw file Scan Method Score m/z  
 34\_38 11405 FTMS; HCD 77.96 817.86

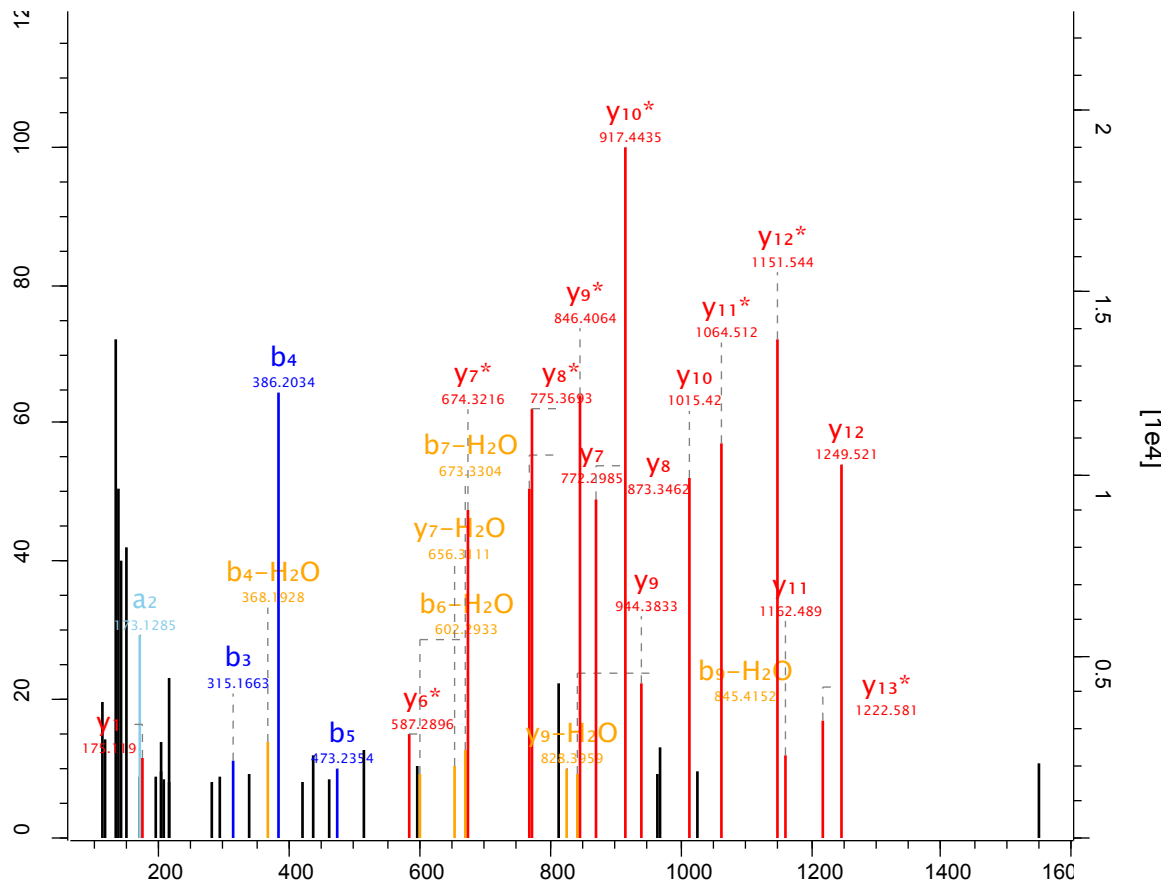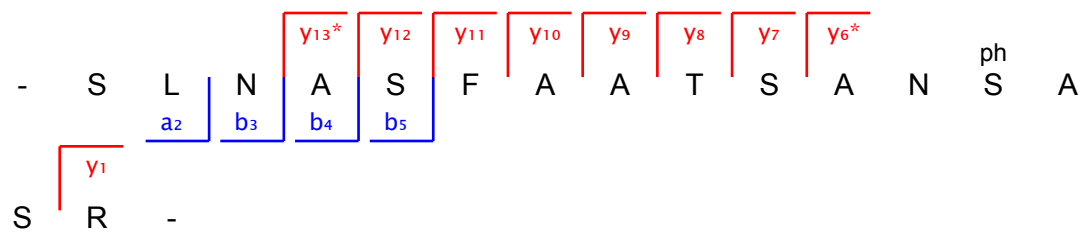

Raw file Scan Method Score m/z  
 34\_38 1154 FTMS; HCD 58.43 321.17

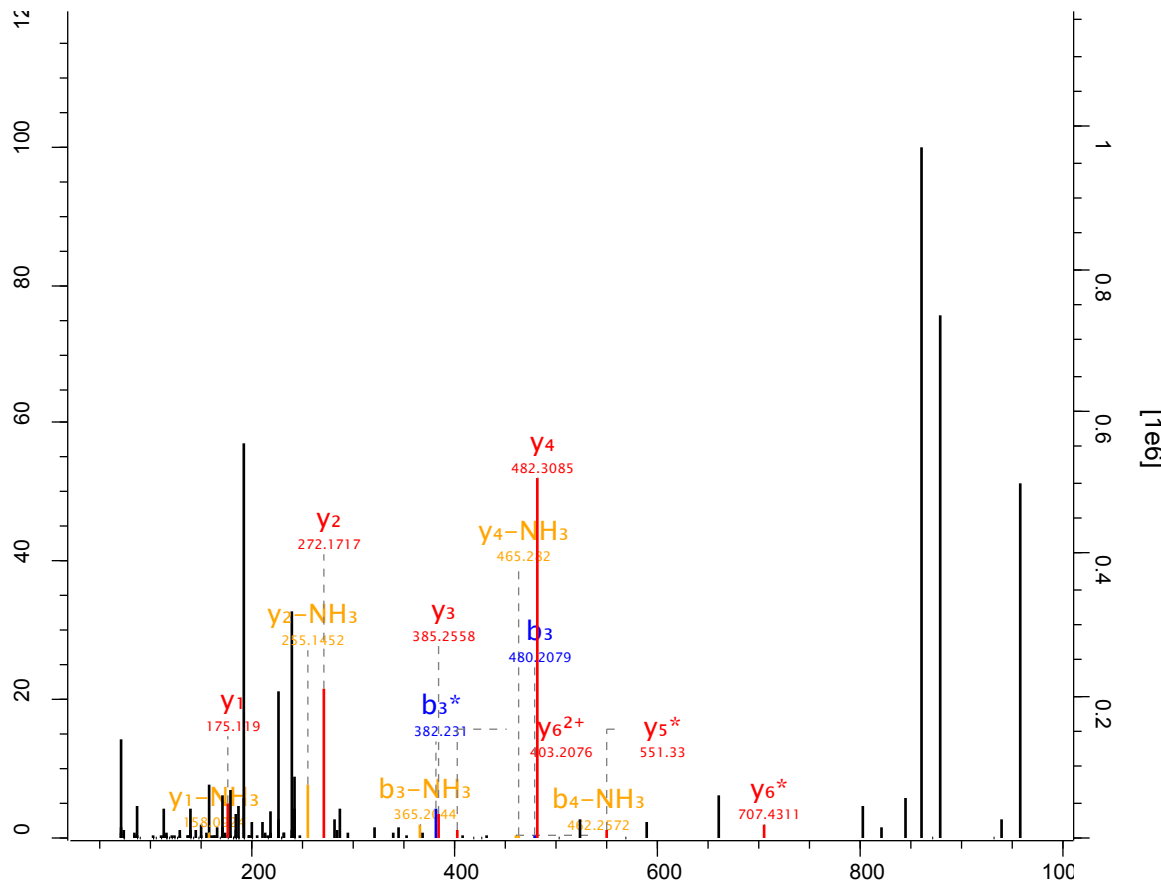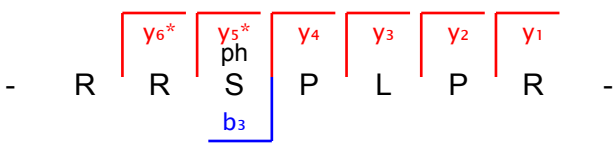





| Raw file | Scan | Method    | Score | m/z    |
|----------|------|-----------|-------|--------|
| 34_38    | 1165 | FTMS; HCD | 45.28 | 395.18 |

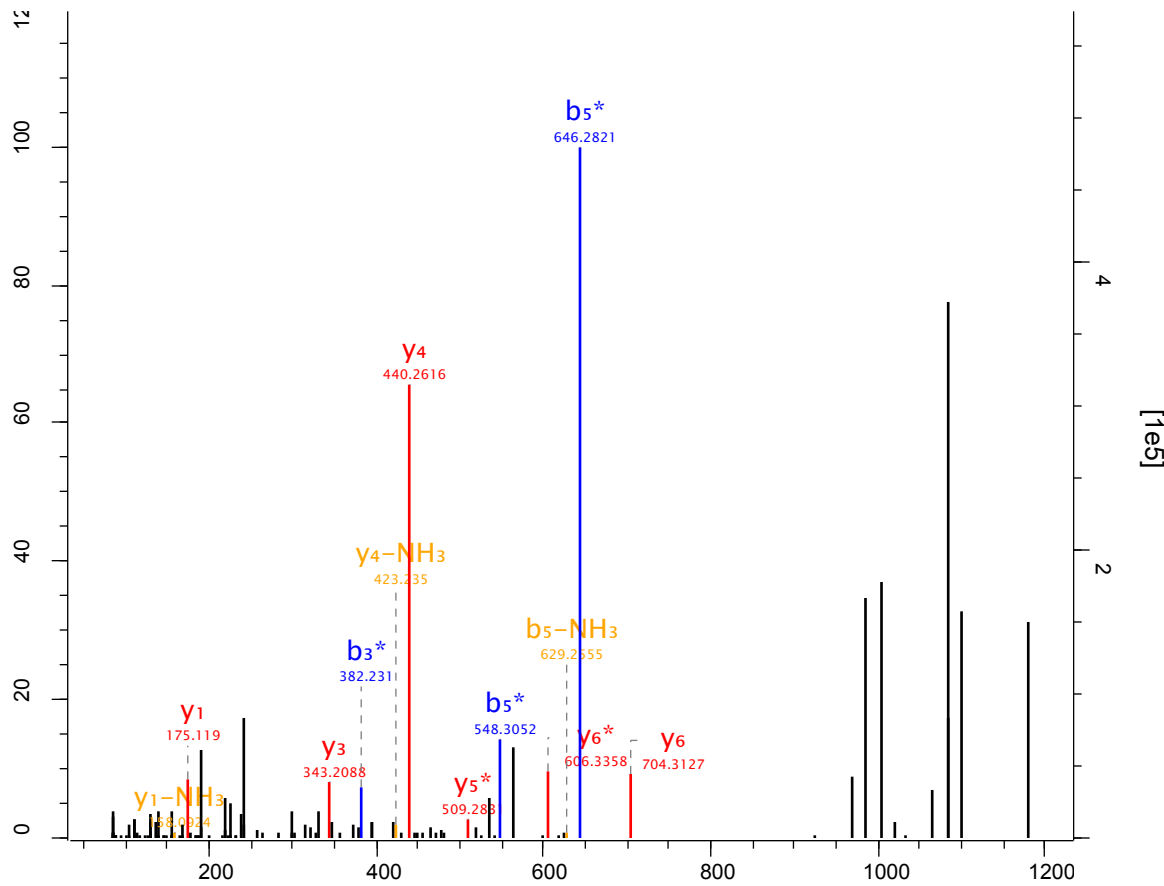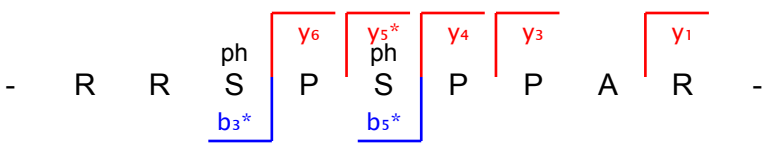

Raw file Scan Method Score m/z  
 34\_38 1188 FTMS; HCD 91.36 525.89

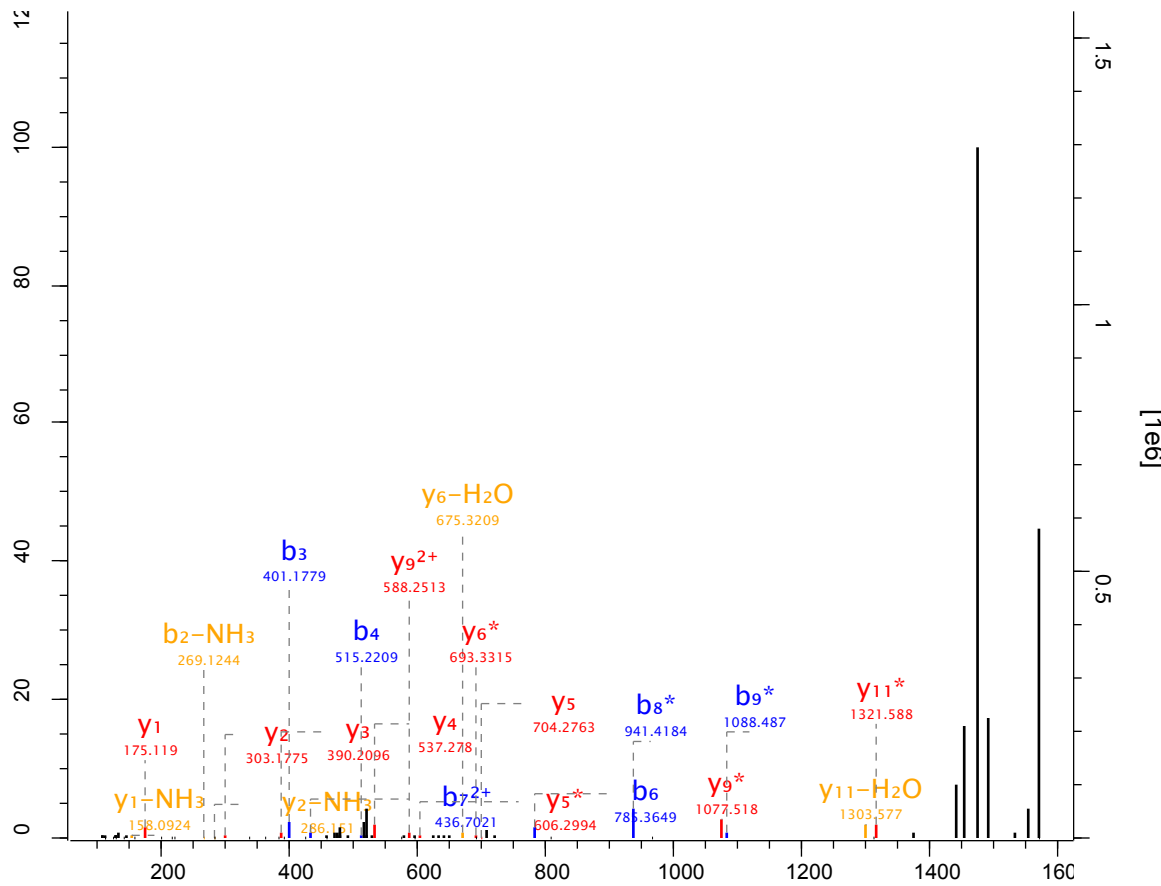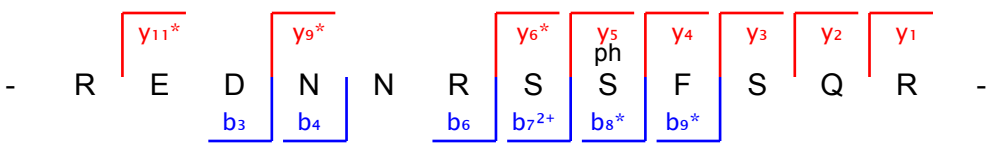

Raw file Scan Method Score m/z  
 34\_38 1195 FTMS; HCD 126.04 703.28

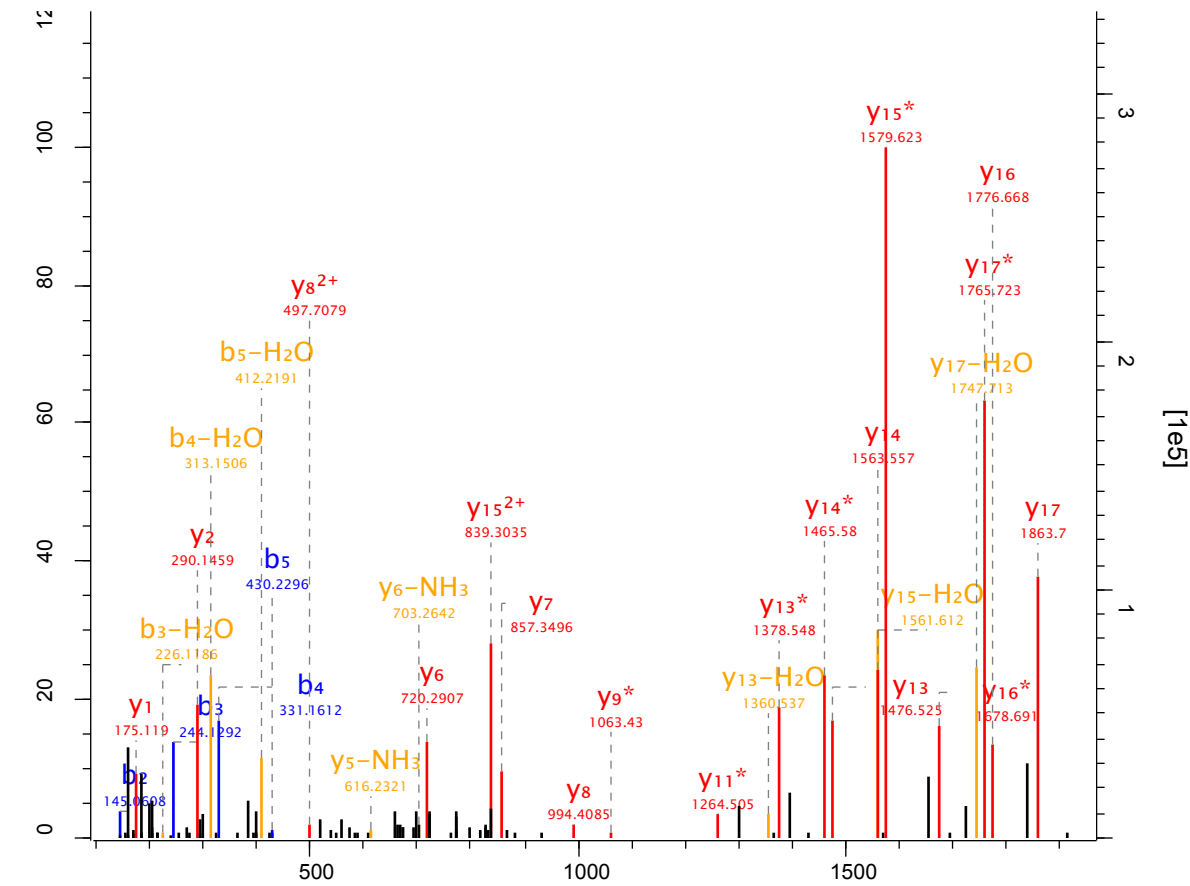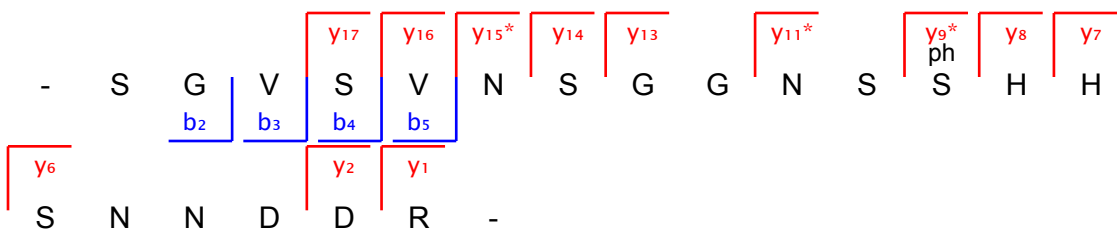

Raw file Scan Method Score m/z  
34\_38 12064 FTMS; HCD 42.08 526.23

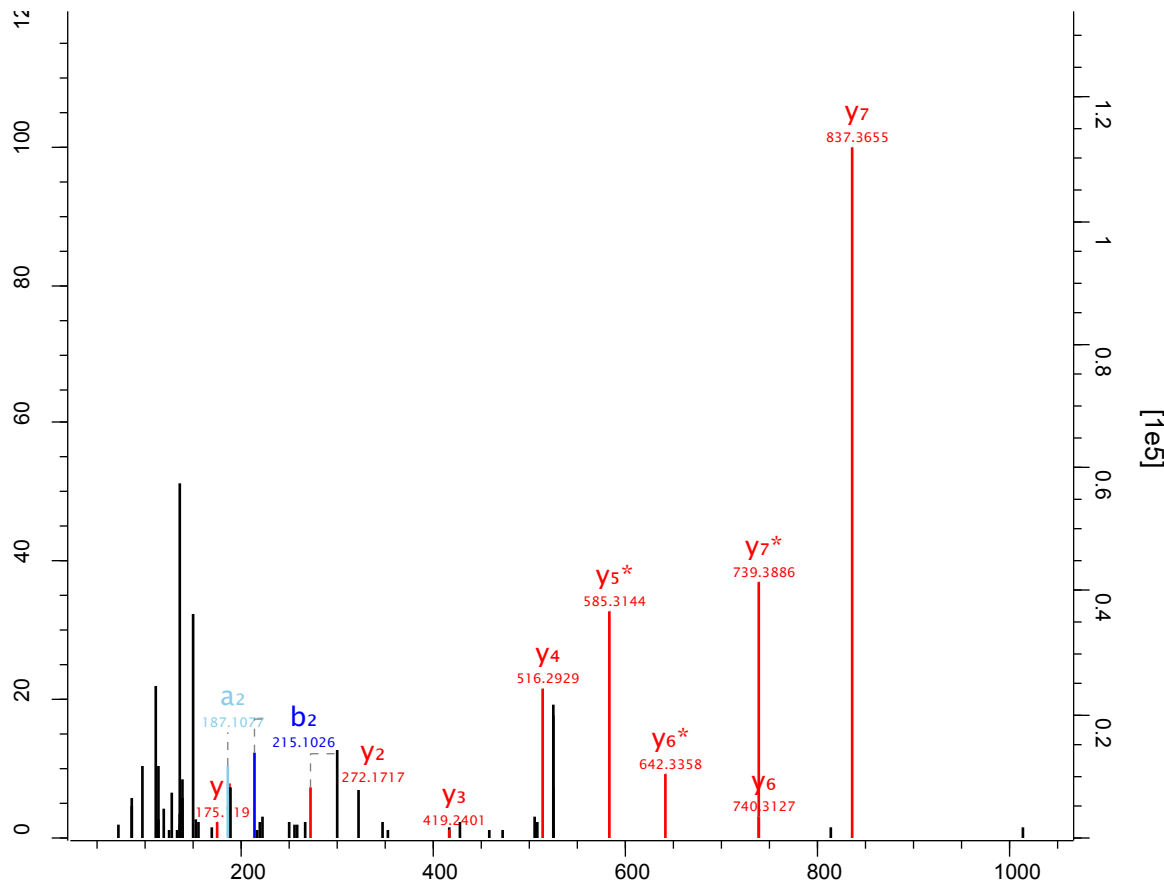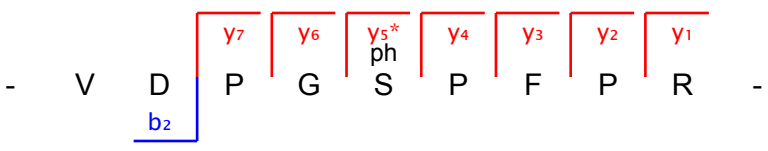

Raw file Scan Method Score m/z  
 34\_38 12273 FTMS; HCD 69.33 707.82

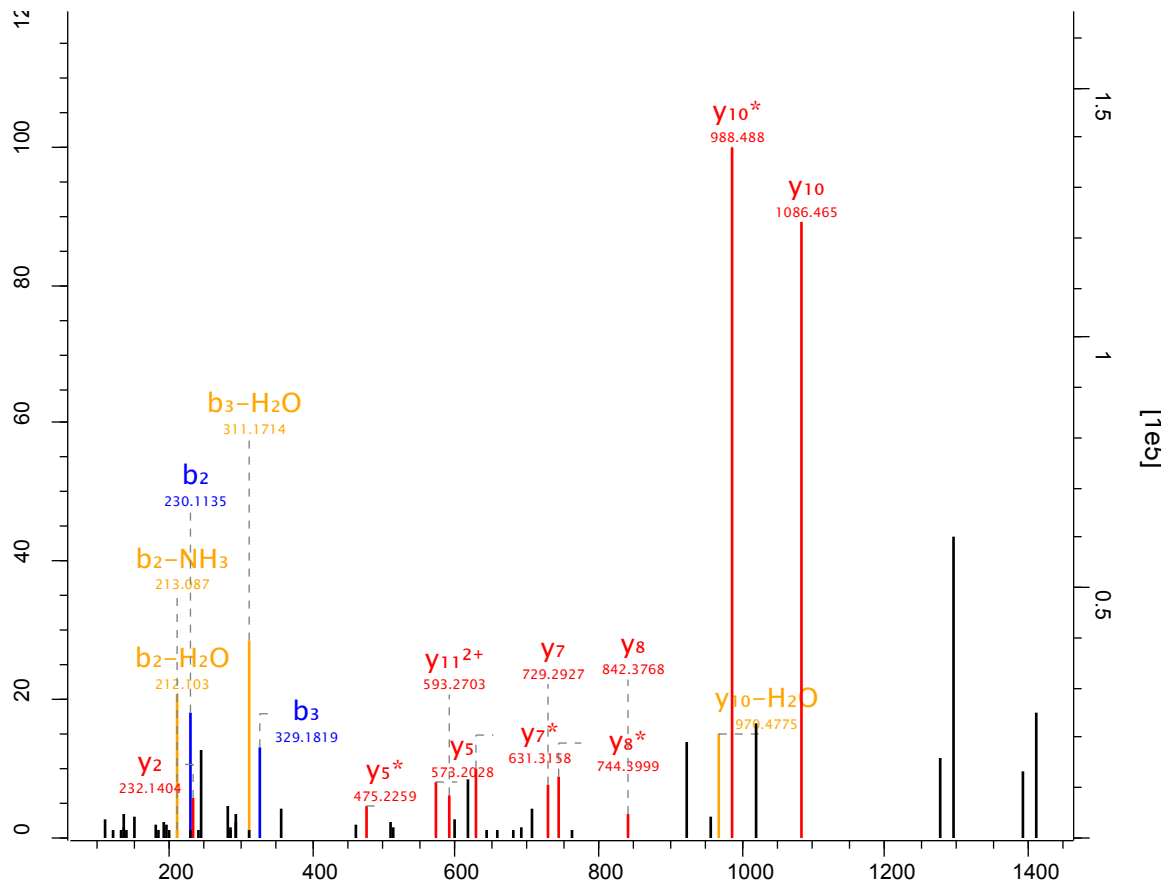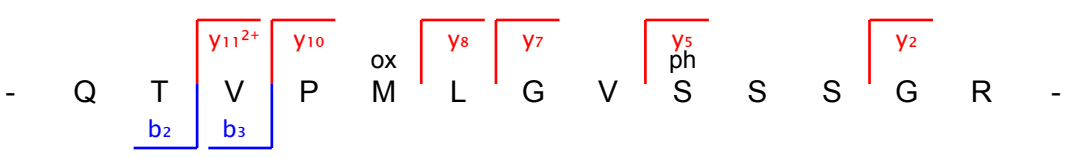

Raw file Scan Method Score m/z  
 34\_38 13934 FTMS; HCD 94.63 611.81

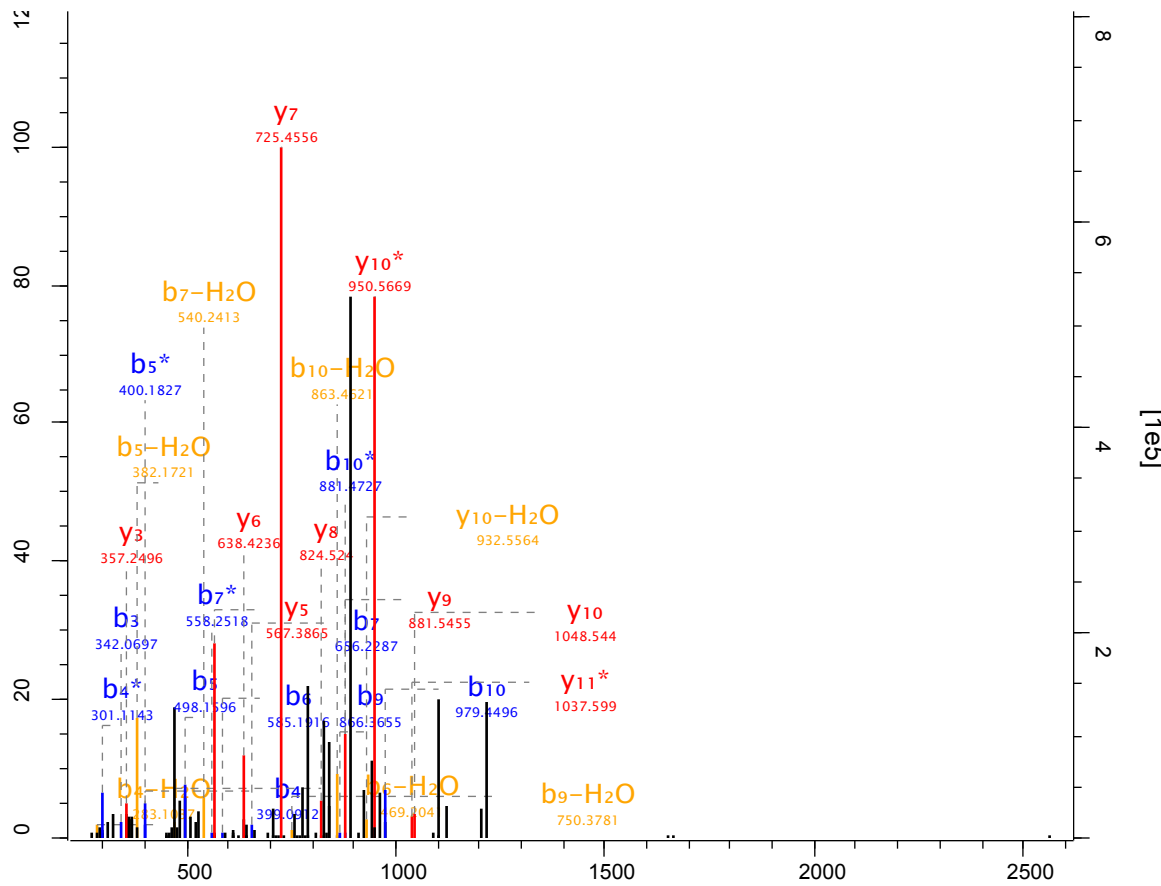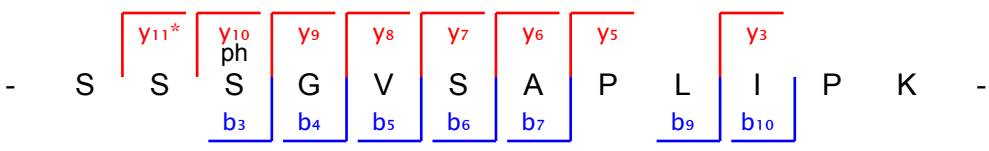

Raw file Scan Method Score m/z  
 34\_38 13952 FTMS; HCD 173.55 809

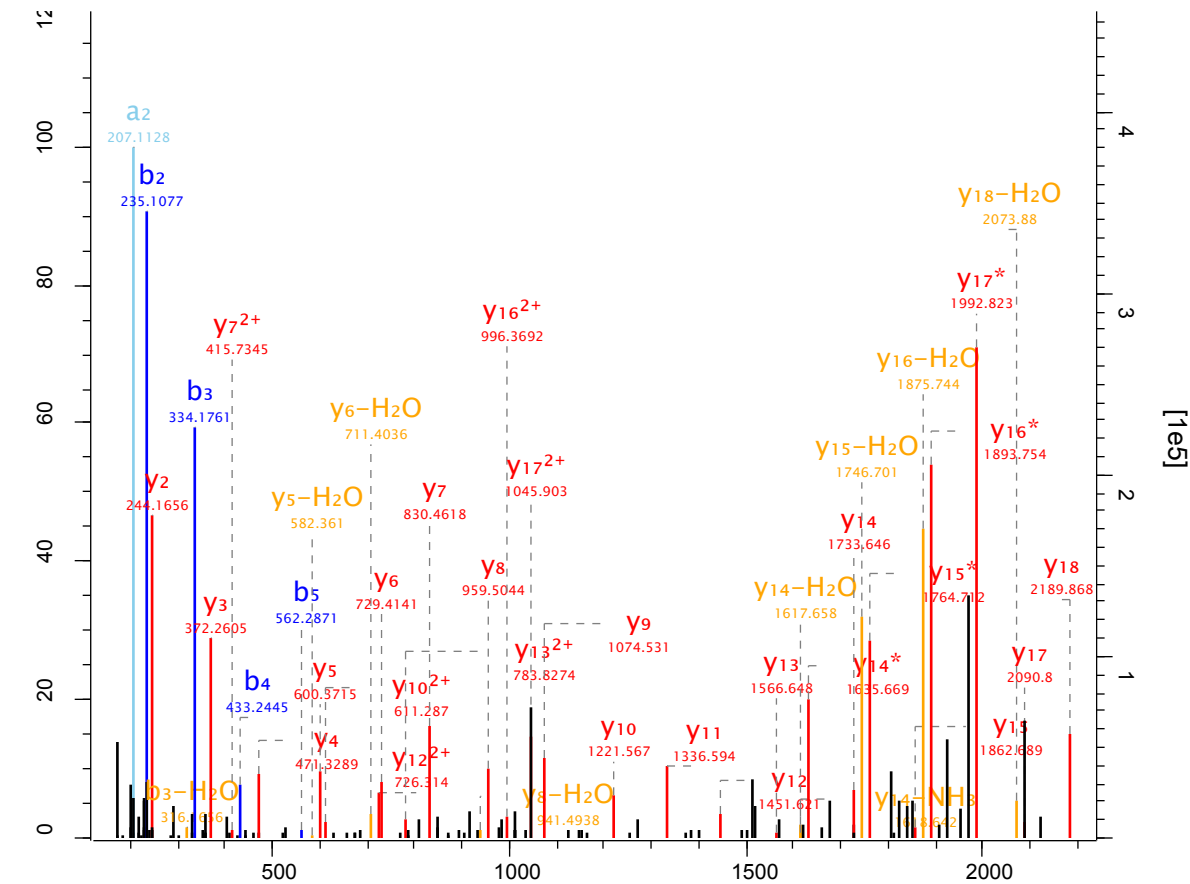

|    |    |    |     |     |      |     |           |     |     |     |           |    |    |    |
|----|----|----|-----|-----|------|-----|-----------|-----|-----|-----|-----------|----|----|----|
|    |    |    | y18 | y17 | y16* | y15 | y14<br>ph | y13 | y12 | y11 | y10<br>OX | y9 | y8 | y7 |
| -  | S  | F  | V   | V   | E    | E   | S         | D   | D   | D   | M         | D  | E  | T  |
|    |    | b2 | b3  | b4  | b5   |     |           |     |     |     |           |    |    |    |
| y6 | y5 | y4 | y3  | y2  |      |     |           |     |     |     |           |    |    |    |
| E  | E  | V  | K   | P   | K    | -   |           |     |     |     |           |    |    |    |

Raw file Scan Method Score m/z  
 34\_38 14178 FTMS; HCD 50.35 686.32

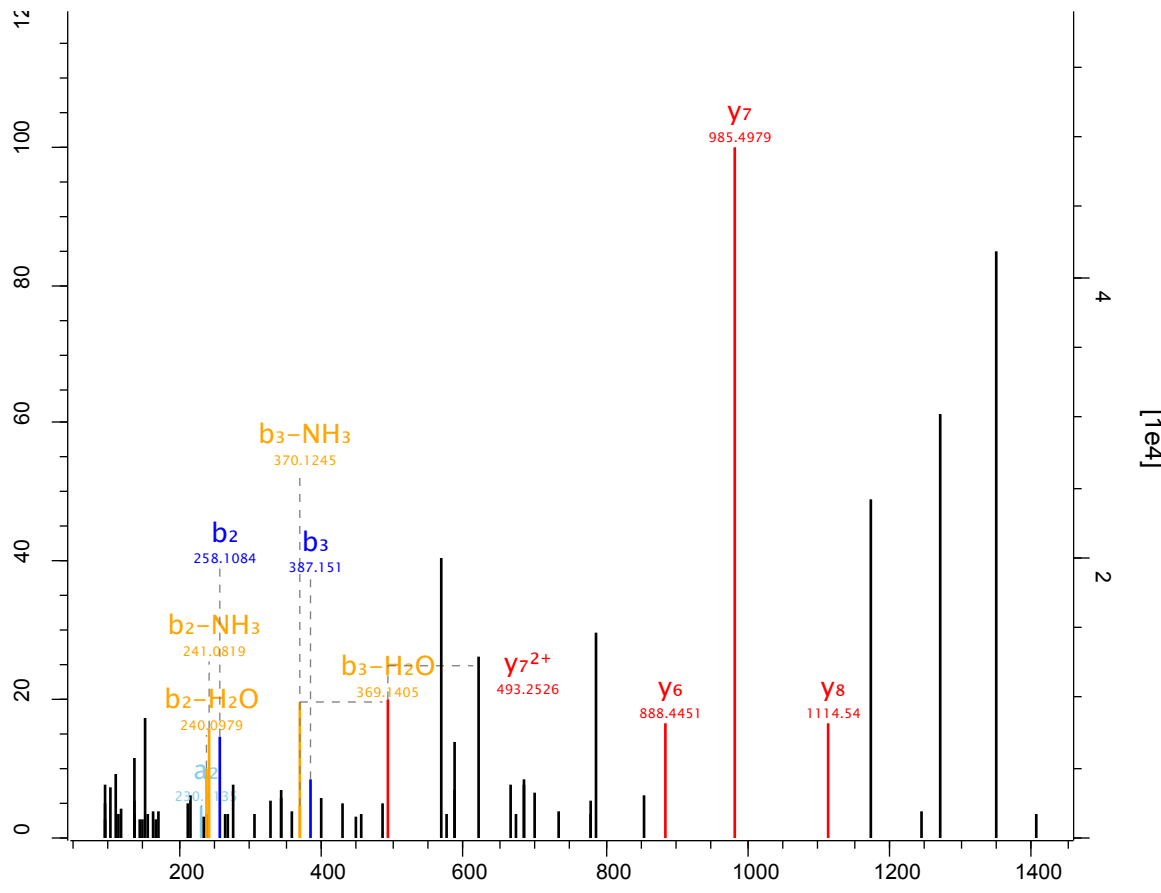

- E Q E P T K F R T R -

Fragmentation mapping (b and y ions):

- Q (m/z 240.0379) is labeled b2.
- E (m/z 258.1084) is labeled b3.
- T (m/z 369.1405) is labeled y6-ph.
- P (m/z 387.151) is labeled y7.
- R (m/z 888.4451) is labeled y6.
- T (m/z 985.4979) is labeled y7.
- R (m/z 1114.54) is labeled y8.



Raw file Scan Method Score m/z  
 34\_38 14187 FTMS; HCD 59.34 882.34

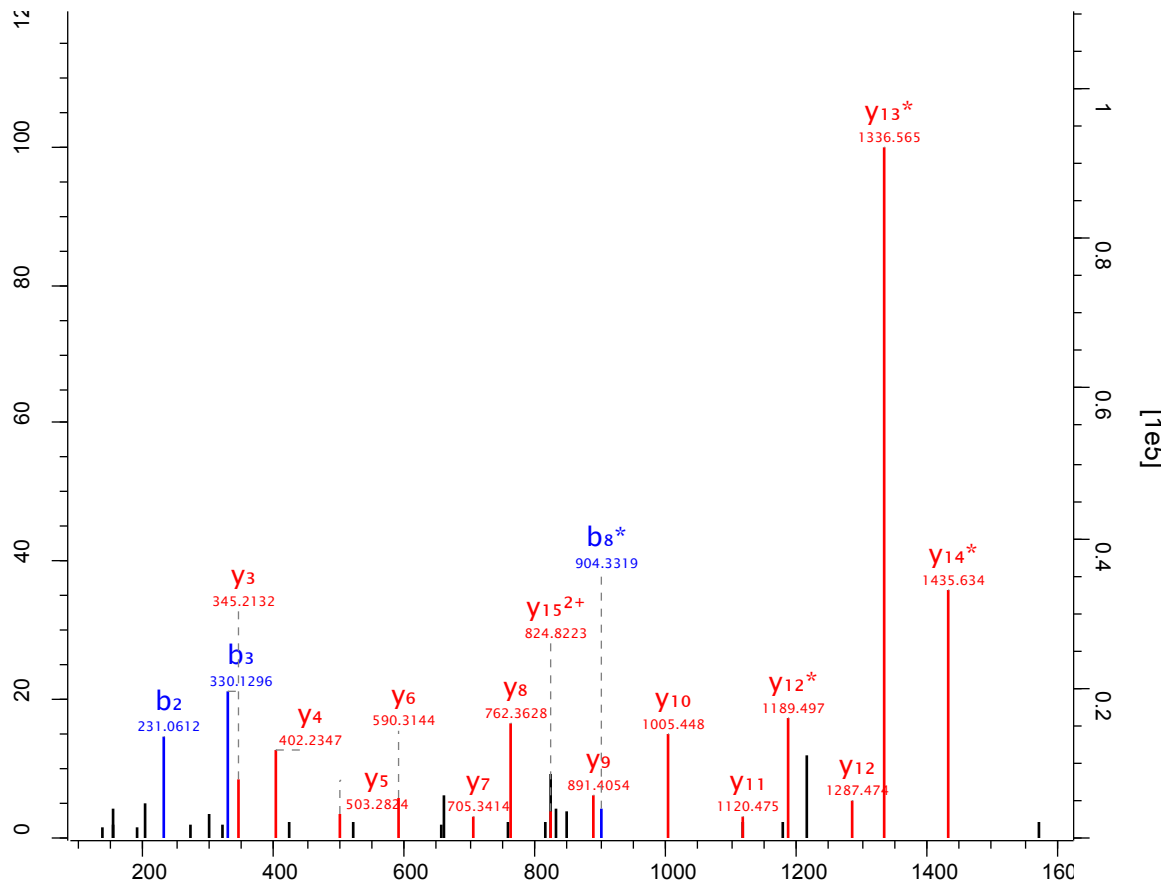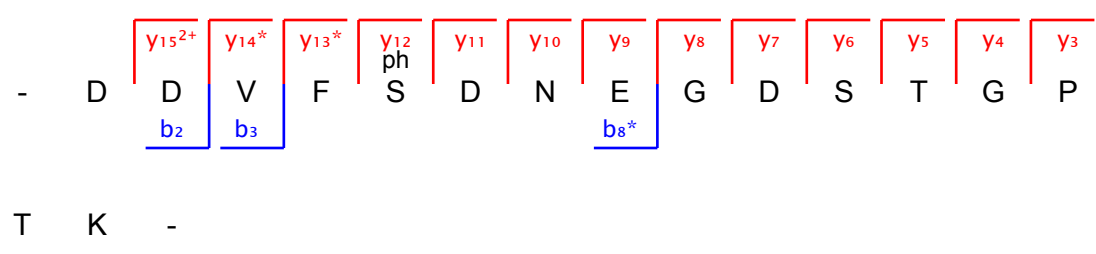

Raw file Scan Method Score m/z  
 34\_38 15269 FTMS; HCD 71.68 714.37

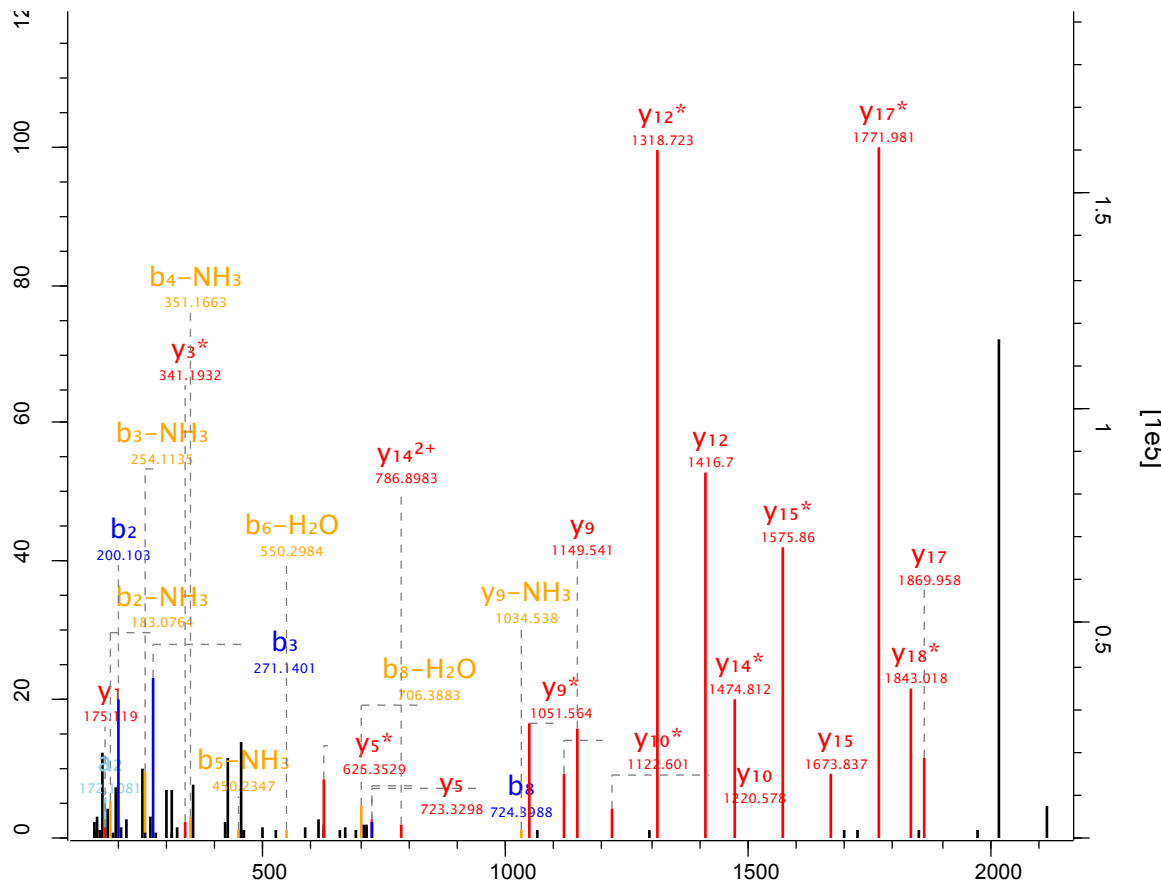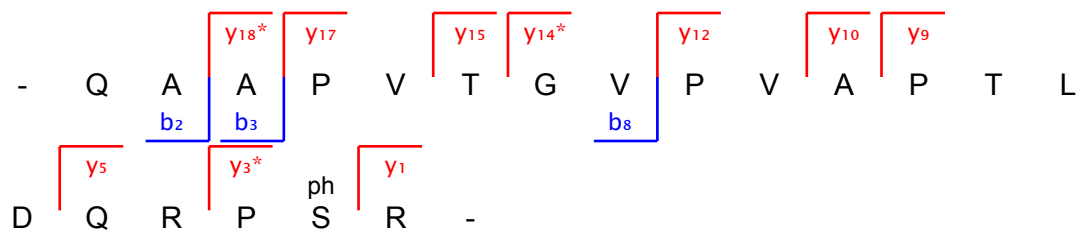

Raw file Scan Method Score m/z  
 34\_38 15613 FTMS; HCD 40.86 662.33

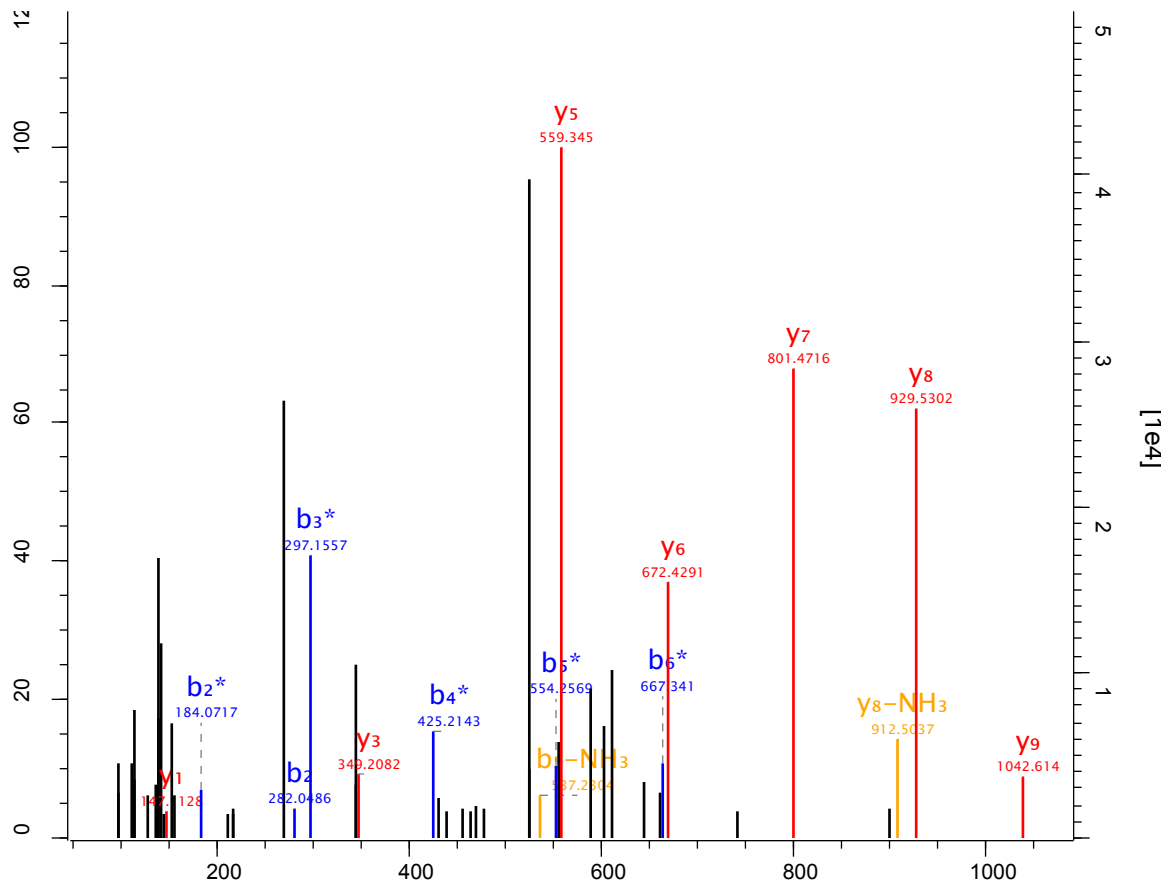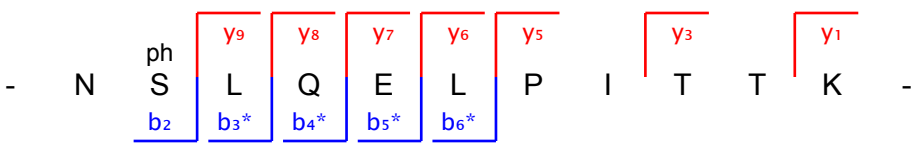

Raw file Scan Method Score m/z  
 34\_38 15874 FTMS; HCD 91.84 659.3

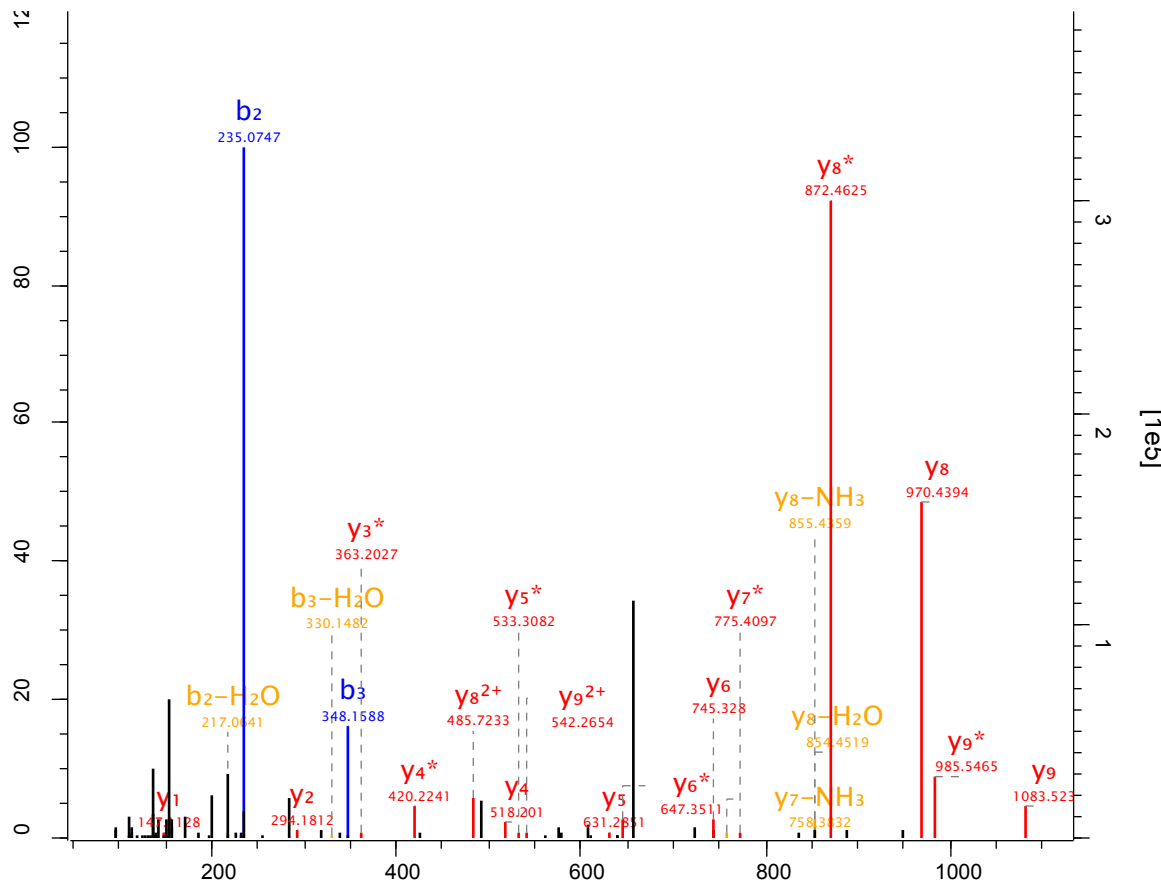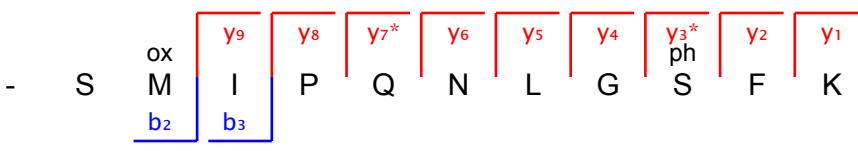

Raw file Scan Method Score m/z  
 34\_38 17166 FTMS; HCD 73.39 689.79

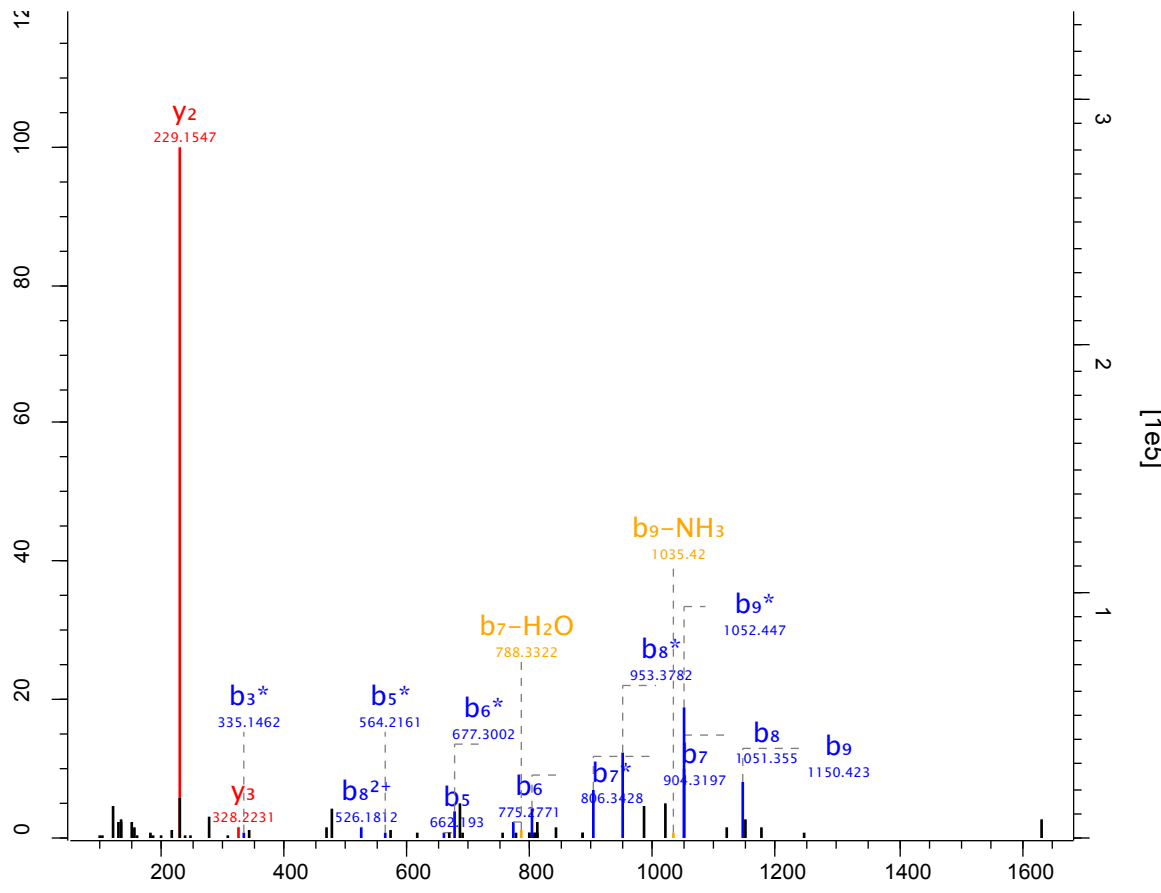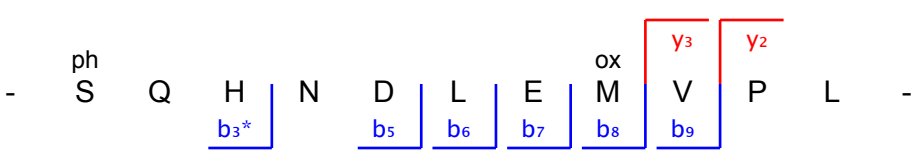

Raw file Scan Method Score m/z  
 34\_38 19026 FTMS; HCD 107.41 695.29

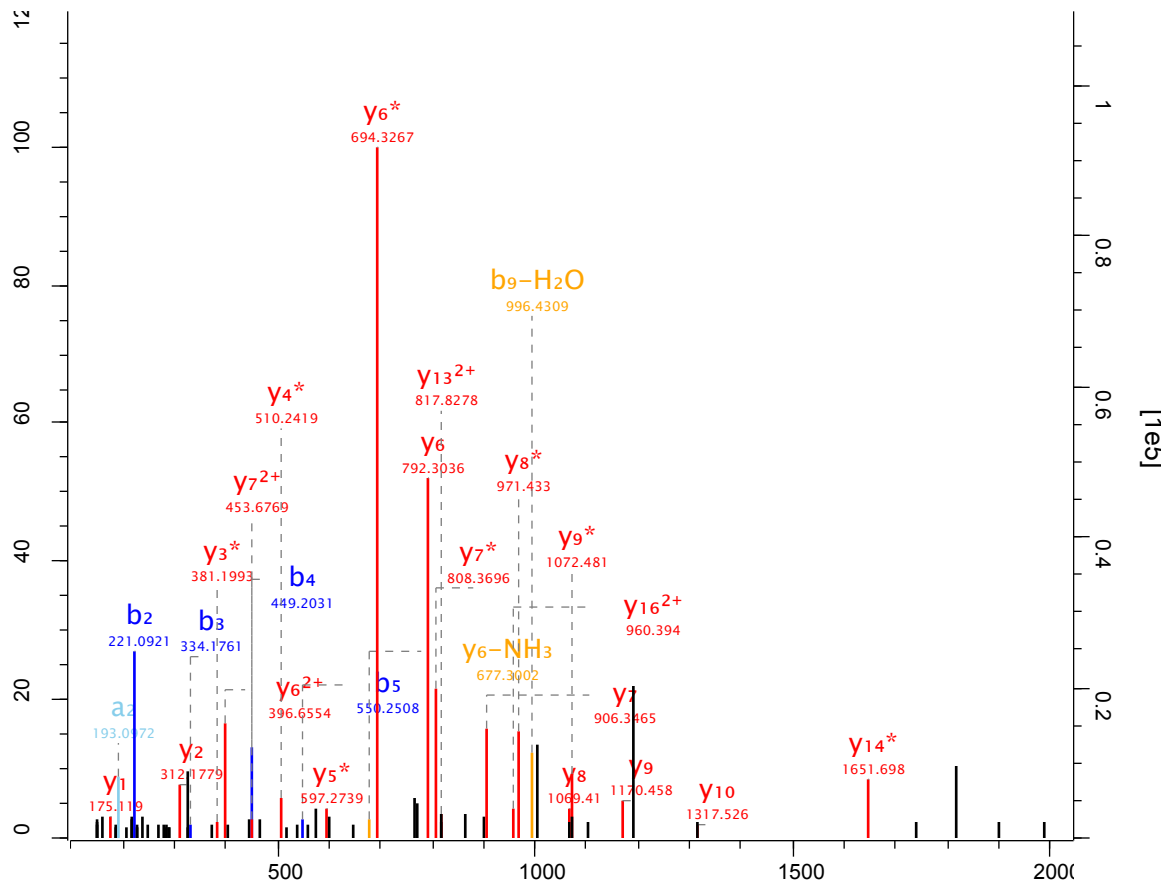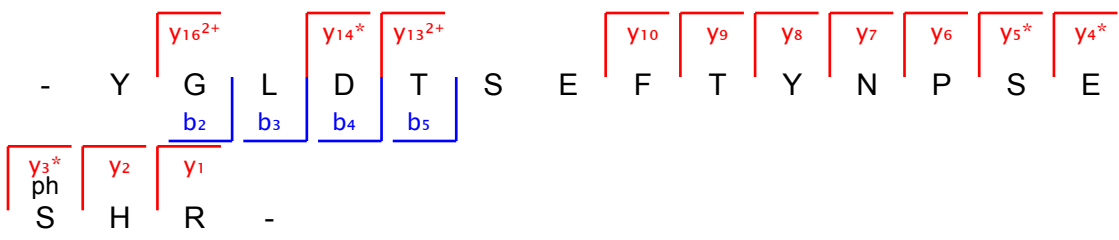

Raw file Scan Method Score m/z  
 34\_38 19141 FTMS; HCD 87.39 748.78

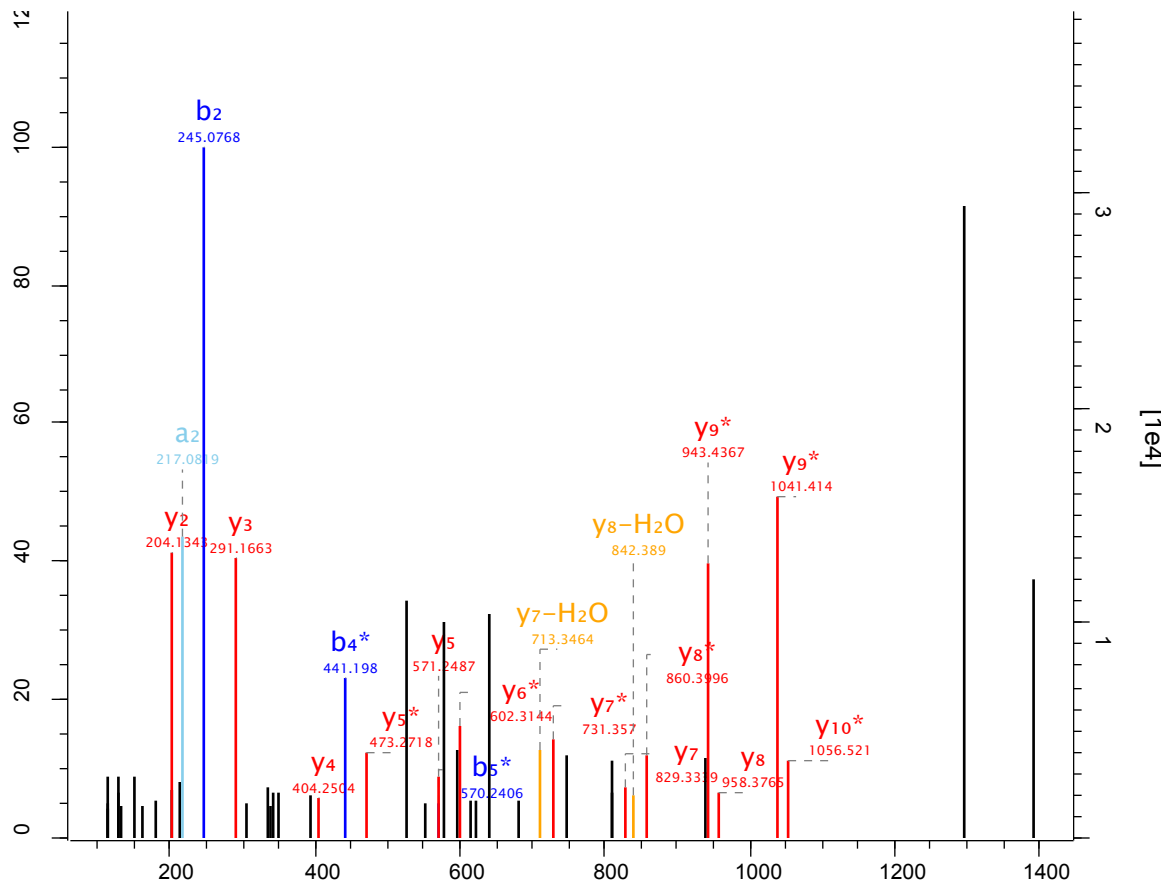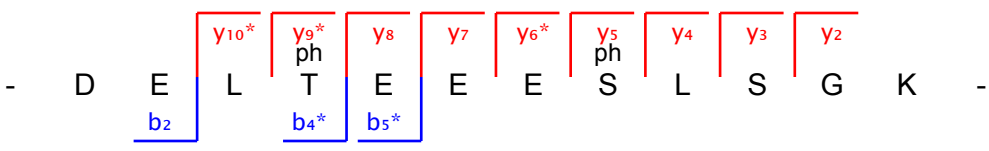

Raw file Scan Method Score m/z  
 34\_38 19638 FTMS; HCD 64.52 672.95

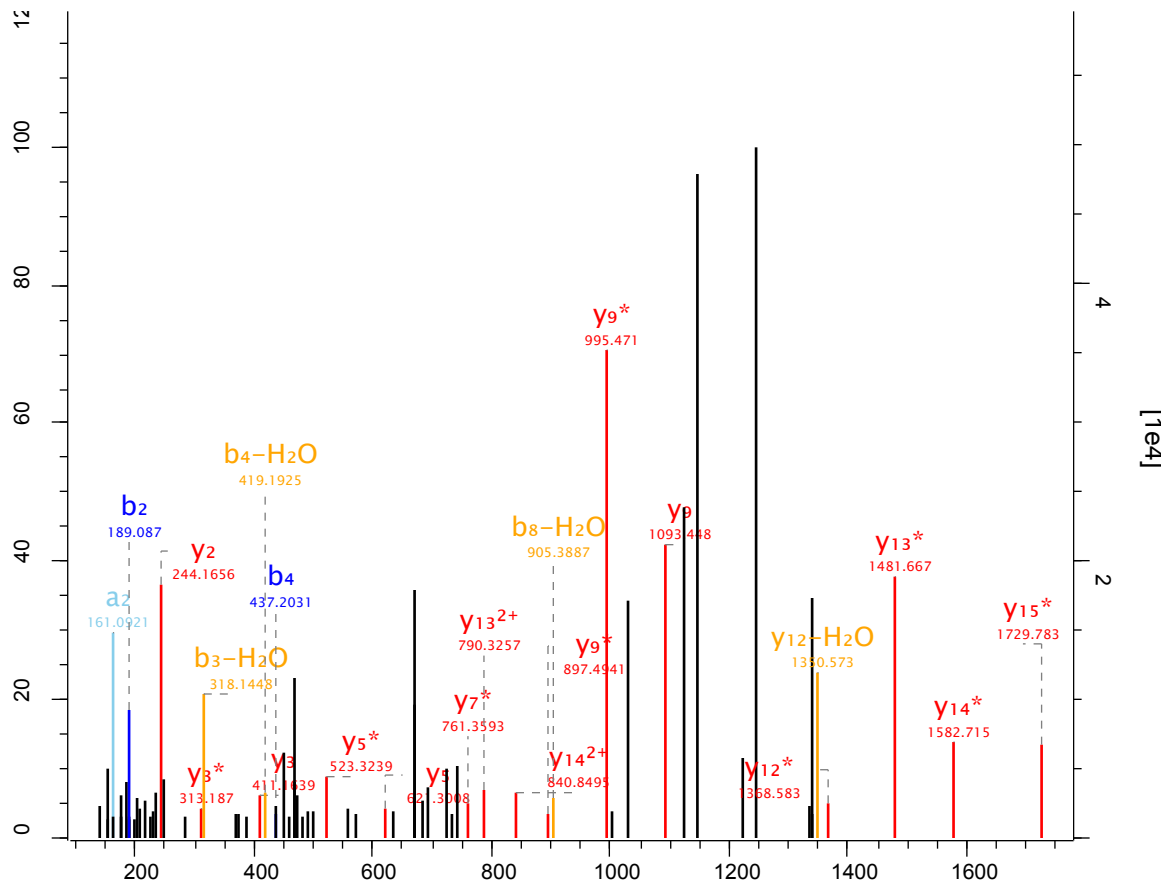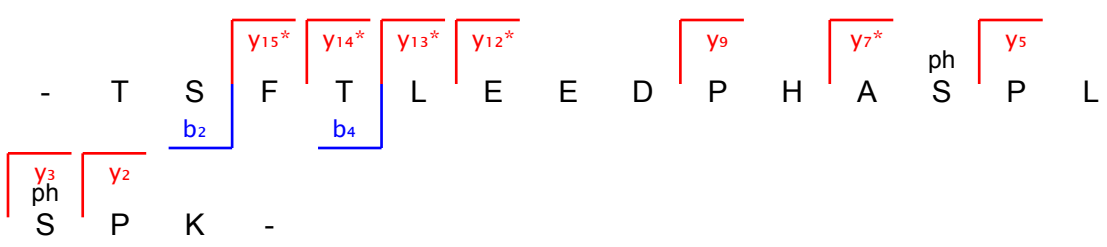



| Raw file | Scan  | Method    | Score | m/z     |
|----------|-------|-----------|-------|---------|
| 34_38    | 21068 | FTMS; HCD | 88.24 | 1121.99 |

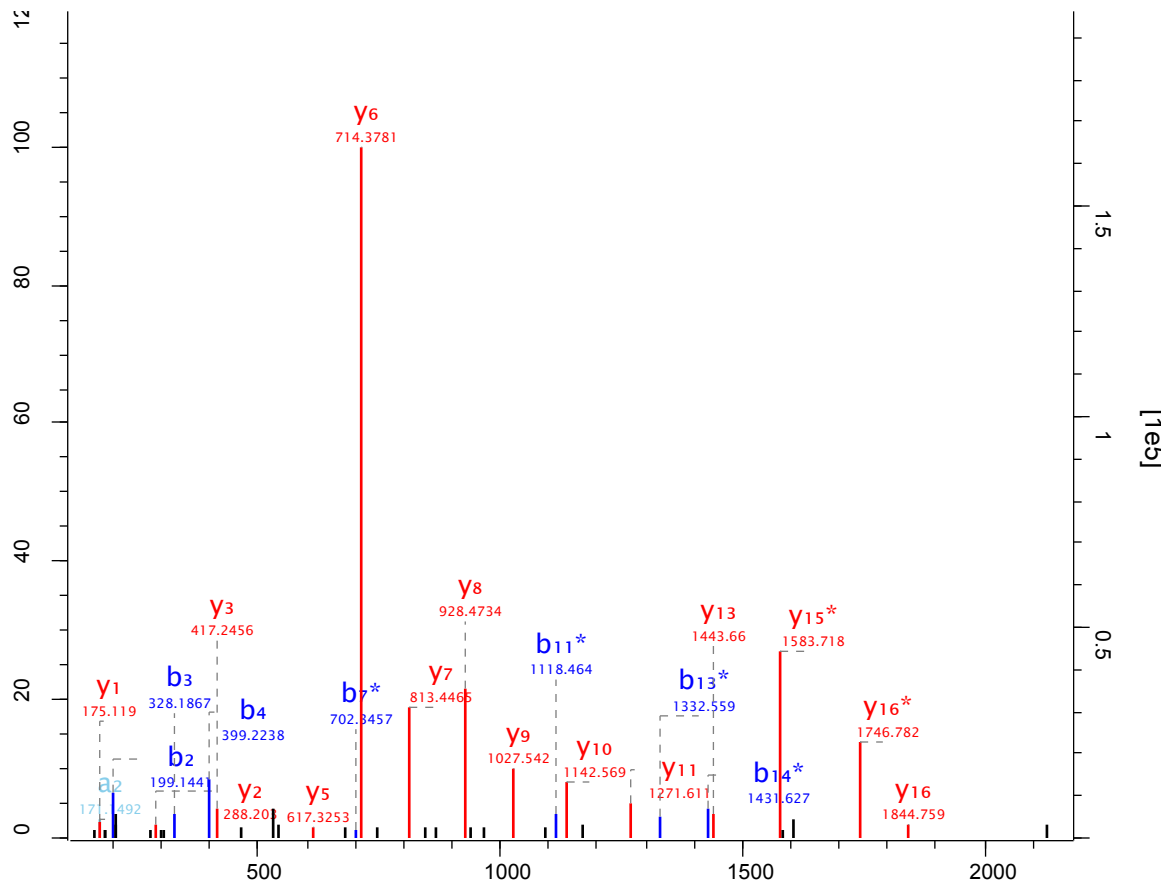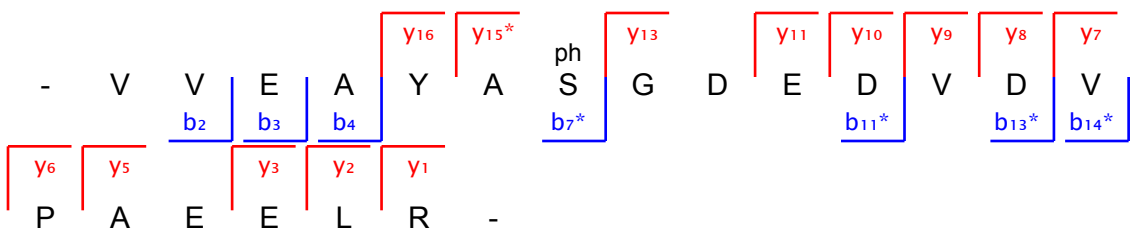

Raw file Scan Method Score m/z  
 34\_38 2570 FTMS; HCD 42.64 709.96

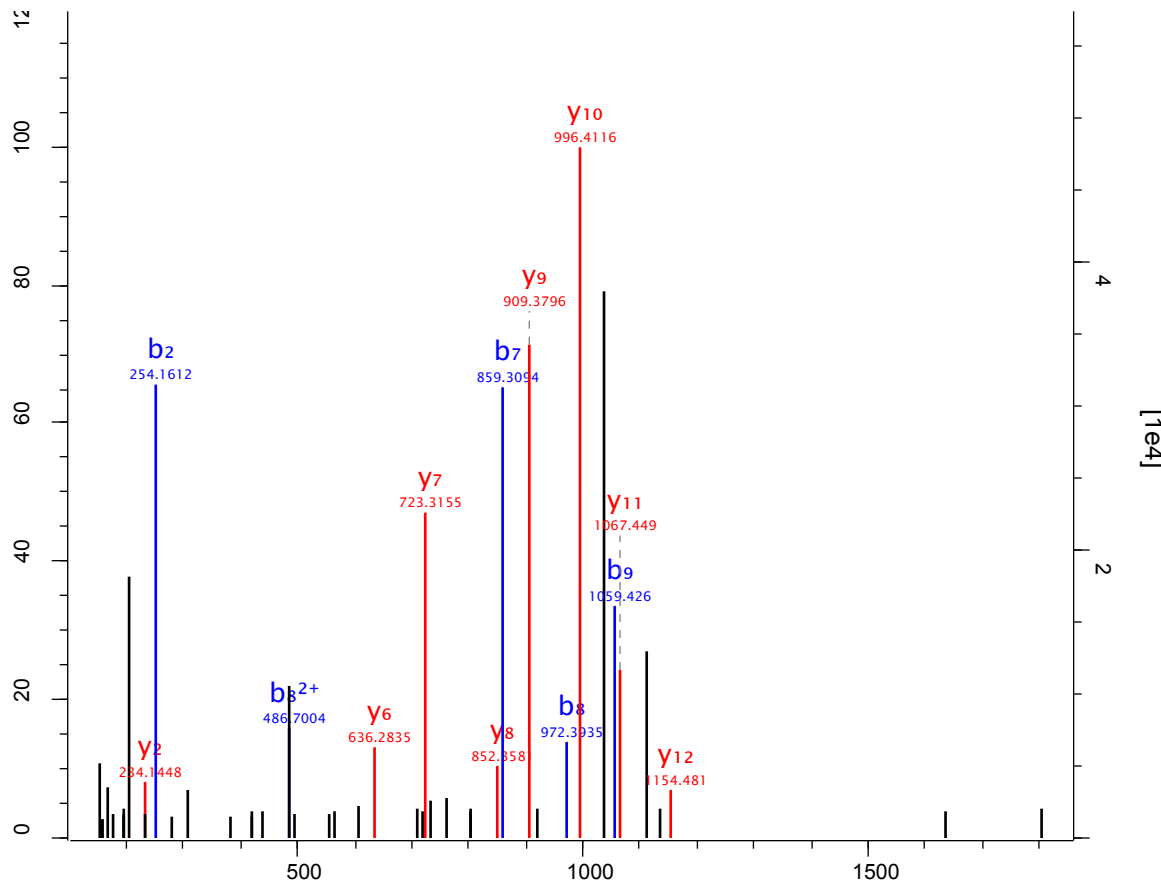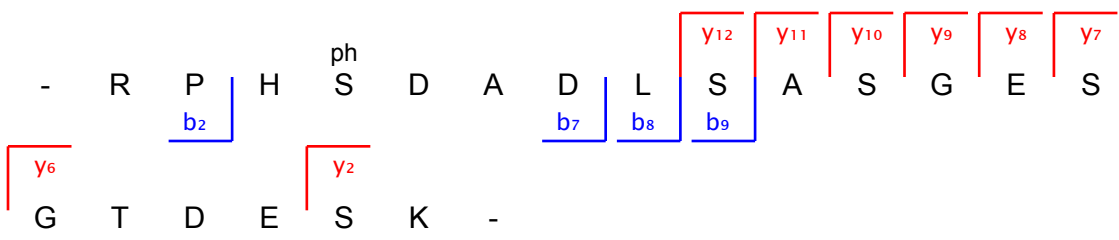



Raw file Scan Method Score m/z  
 34\_38 2945 FTMS; HCD 52.97 698.95

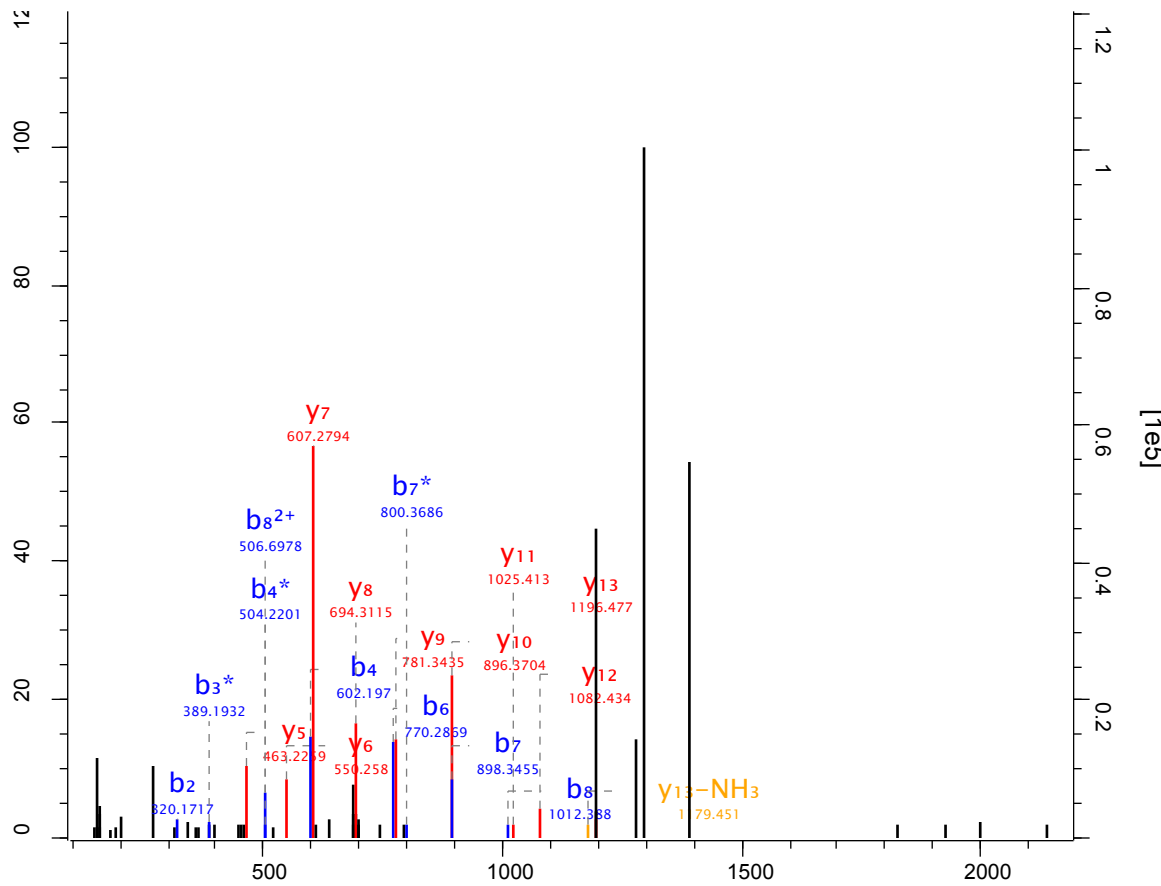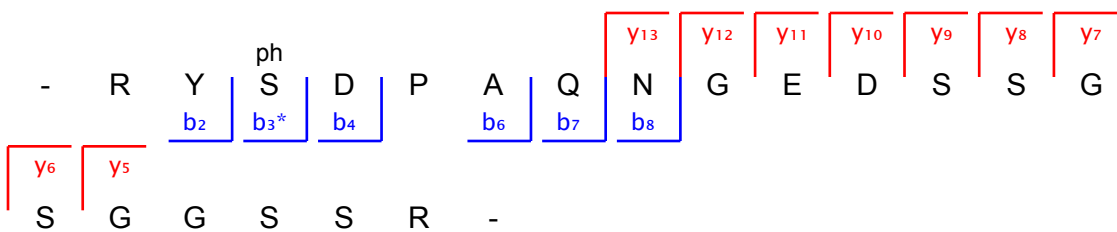

Raw file 34\_38 Scan 3367 Method FTMS; HCD Score 119.21 m/z 487.25

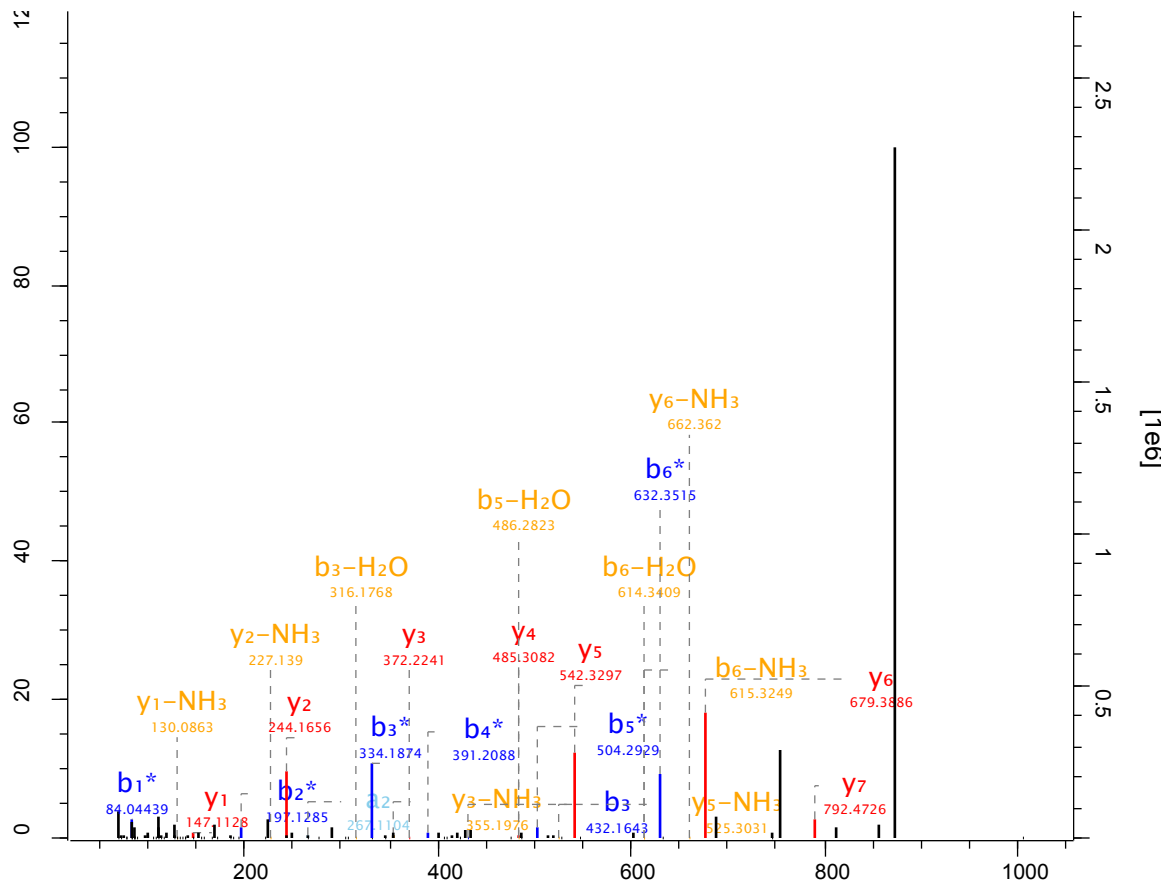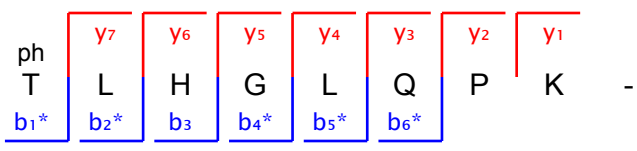

Raw file Scan Method Score m/z  
 34\_38 34121 FTMS; HCD 59.37 874.05

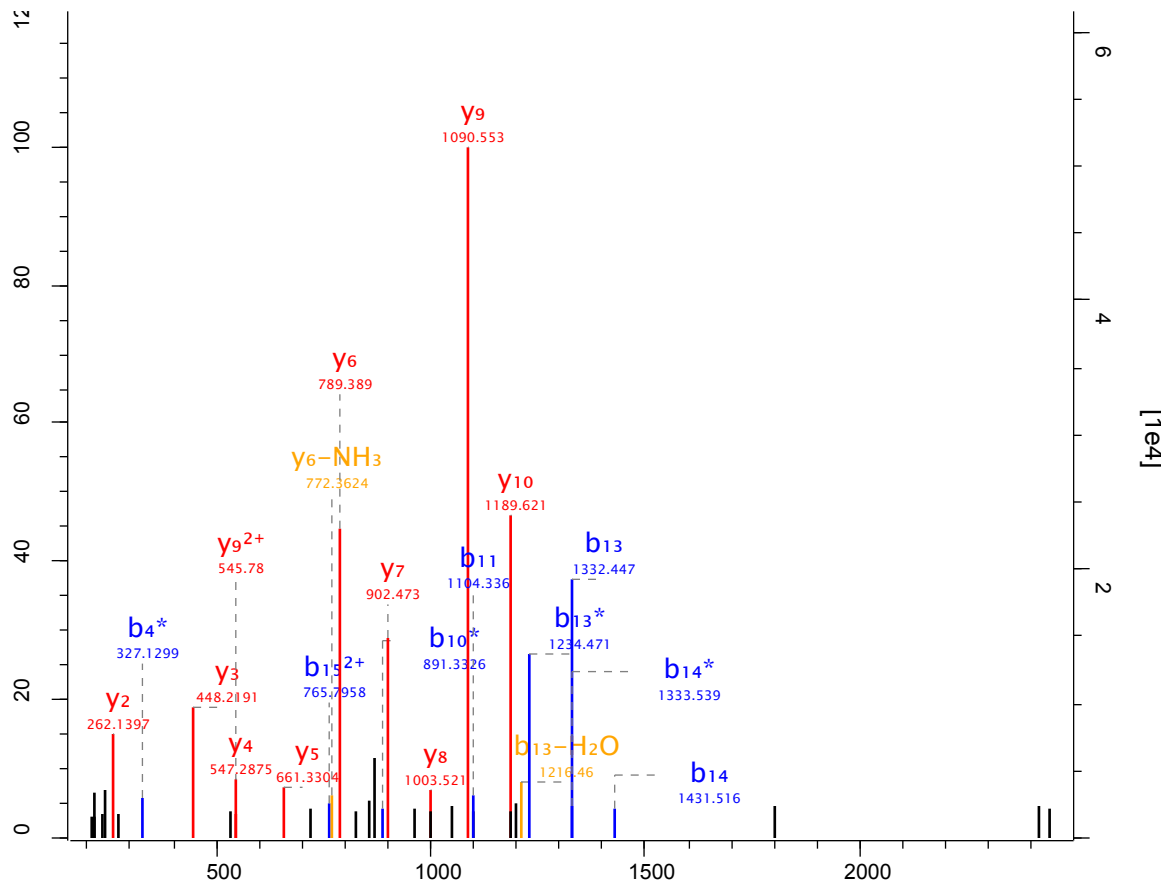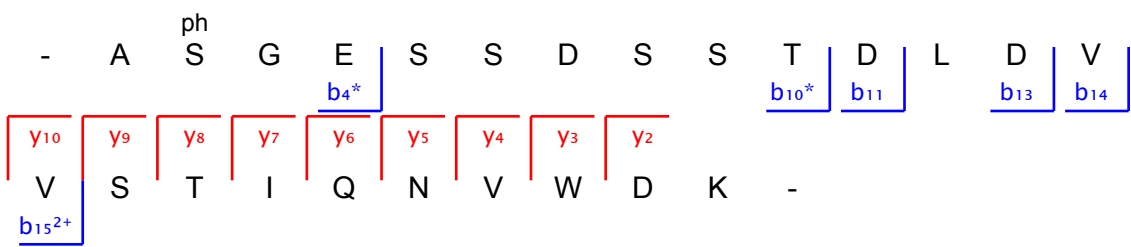

Raw file Scan Method Score m/z  
 34\_38 3606 FTMS; HCD 49.45 625.23

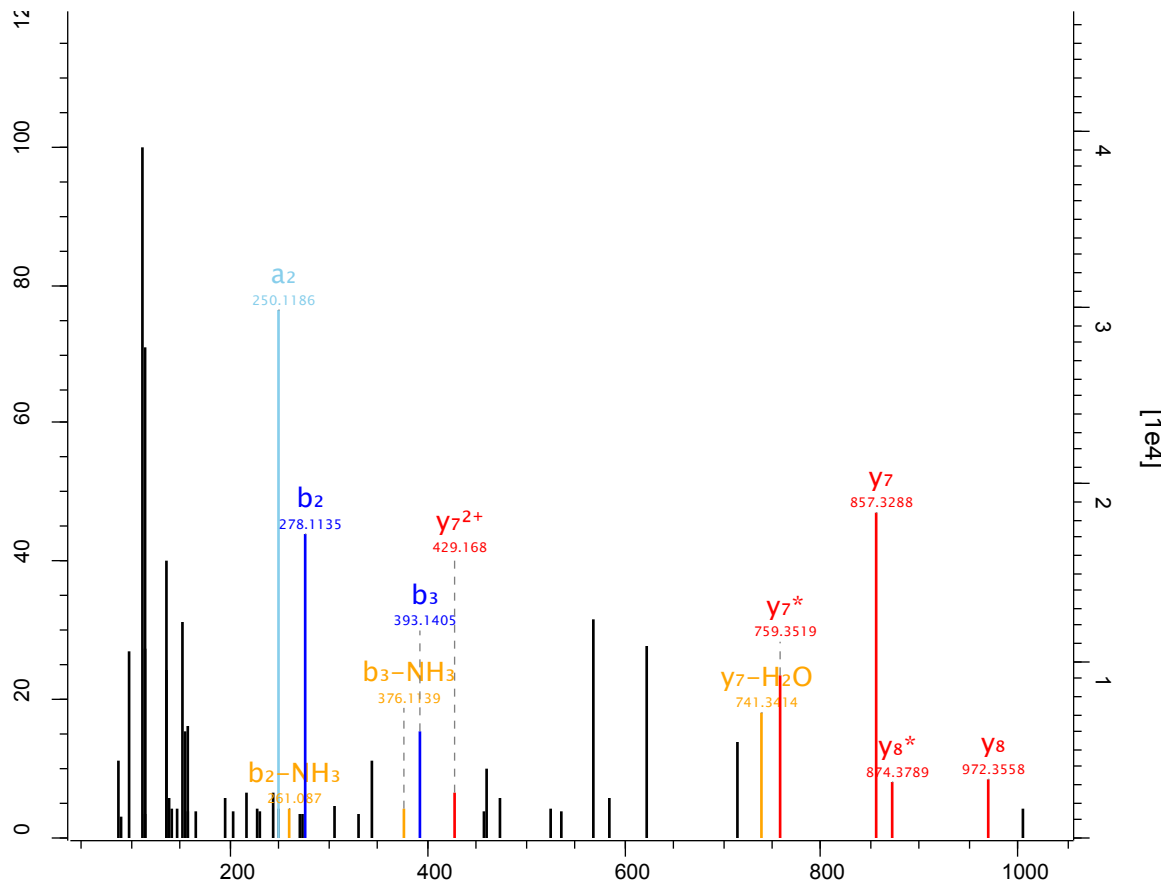

- N Y D P S E T S E K -

Annotations: **b<sub>2</sub>** (under Y), **b<sub>3</sub>** (under D), **y<sub>8</sub>** (over D), **y<sub>7</sub>** (over P)

Raw file Scan Method Score m/z  
 34\_38 36781 FTMS; HCD 143.25 800.77

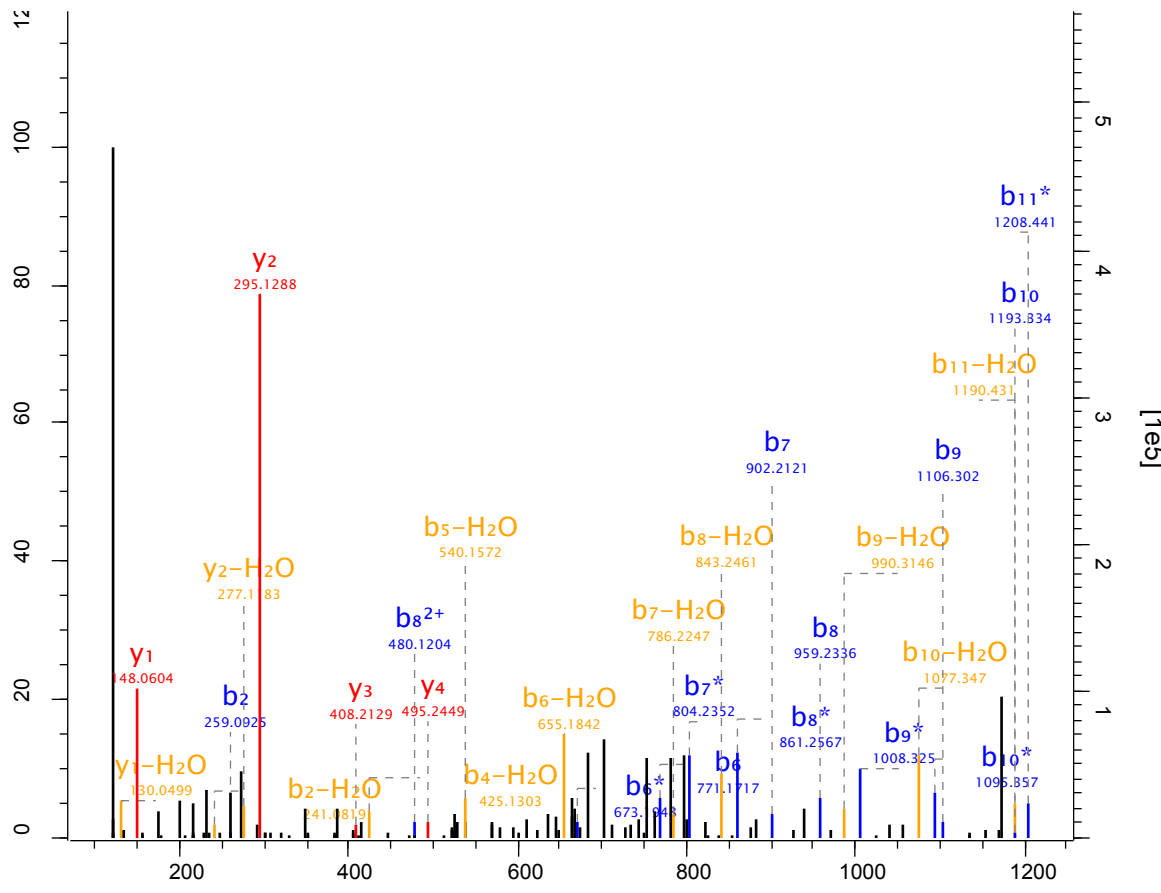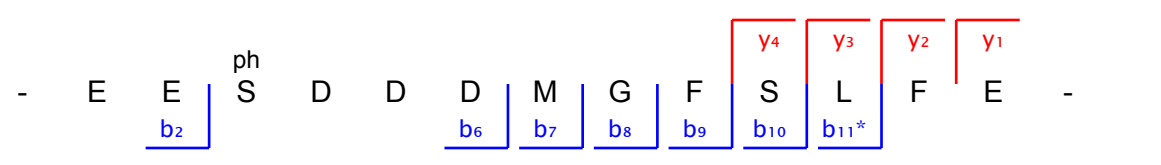



Raw file Scan Method Score m/z  
 34\_38 4005 FTMS; HCD 76.96 693.95

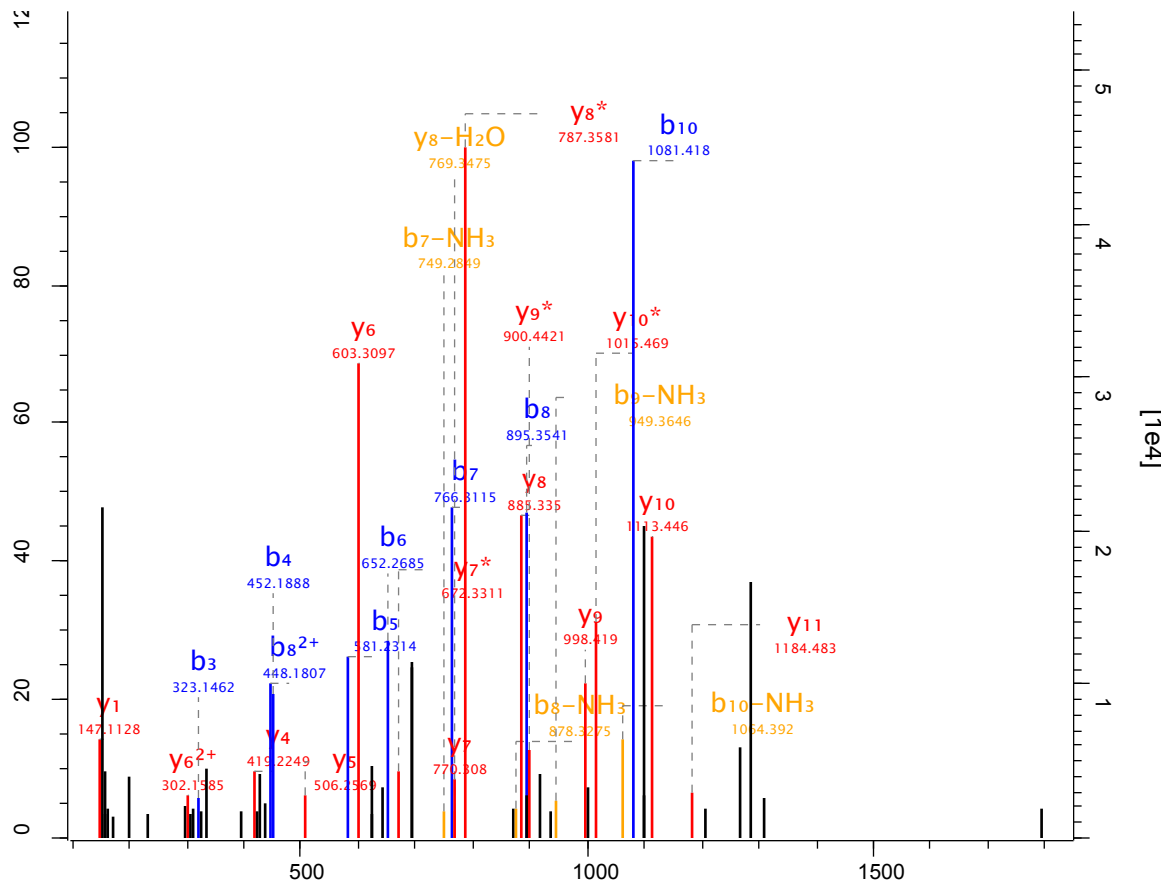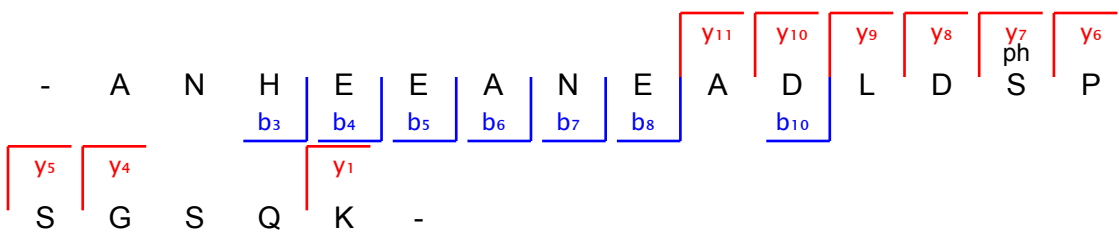

Raw file Scan Method Score m/z  
 34\_38 4196 FTMS; HCD 86.55 711.79

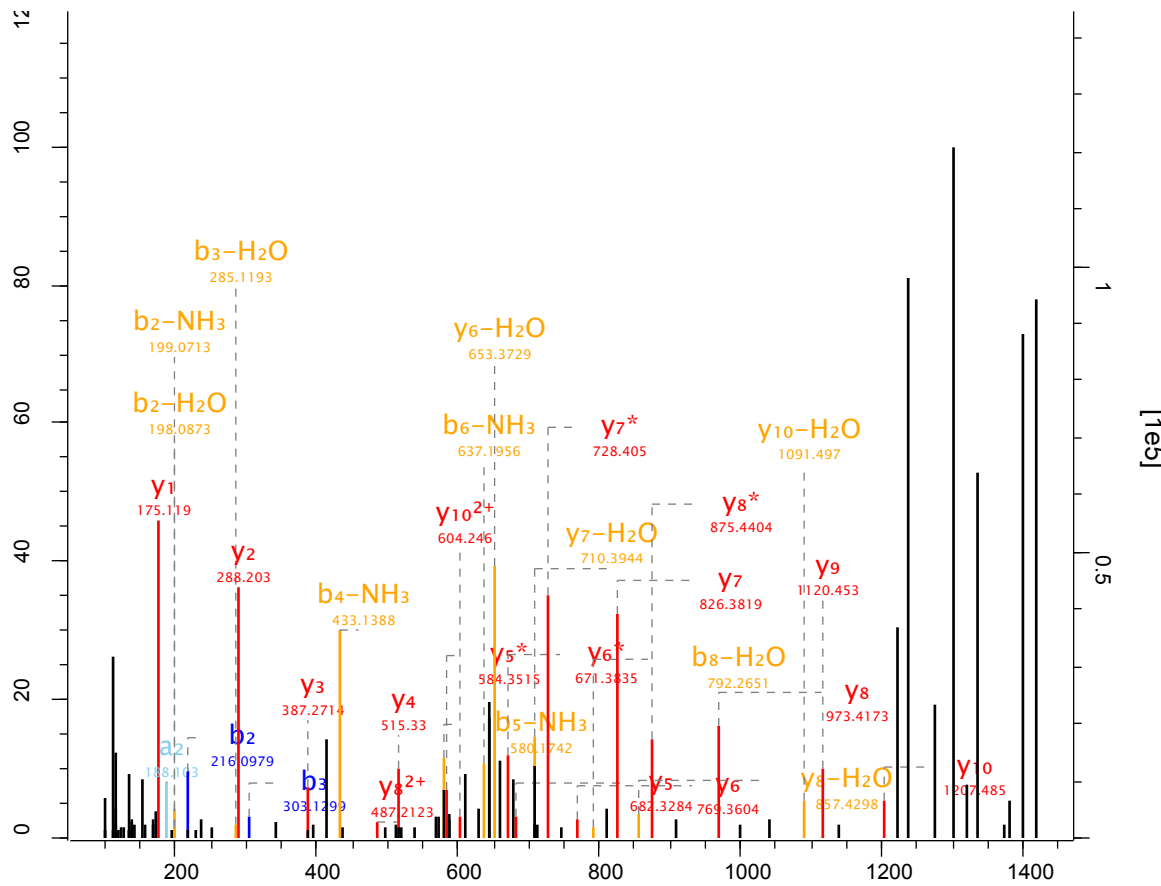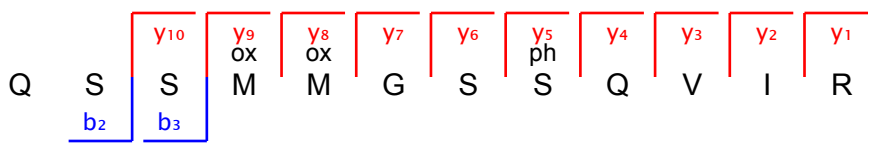

| Raw file | Scan | Method    | Score | m/z   |
|----------|------|-----------|-------|-------|
| 34_38    | 4355 | FTMS; HCD | 88.6  | 427.7 |

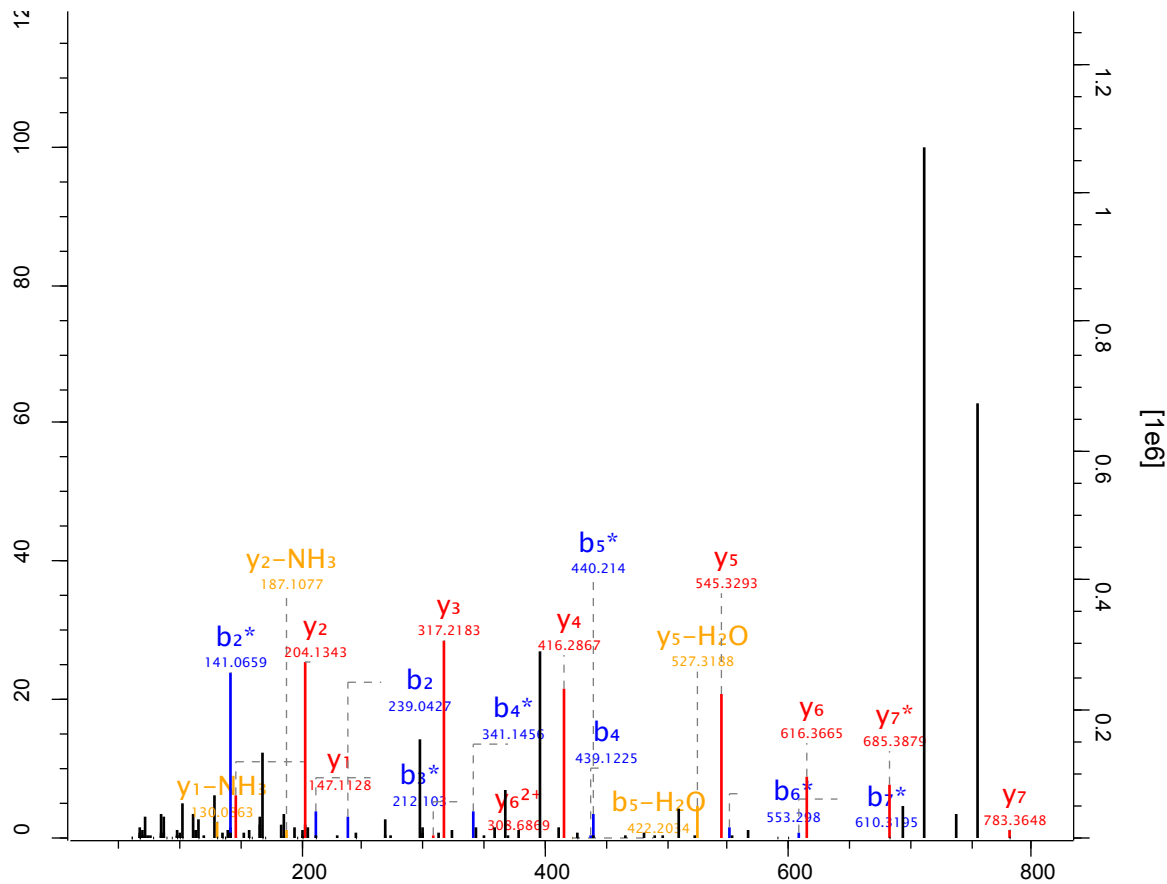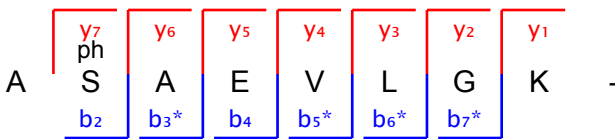

Raw file Scan Method Score m/z  
 34\_38 4839 FTMS; HCD 55.72 759.28

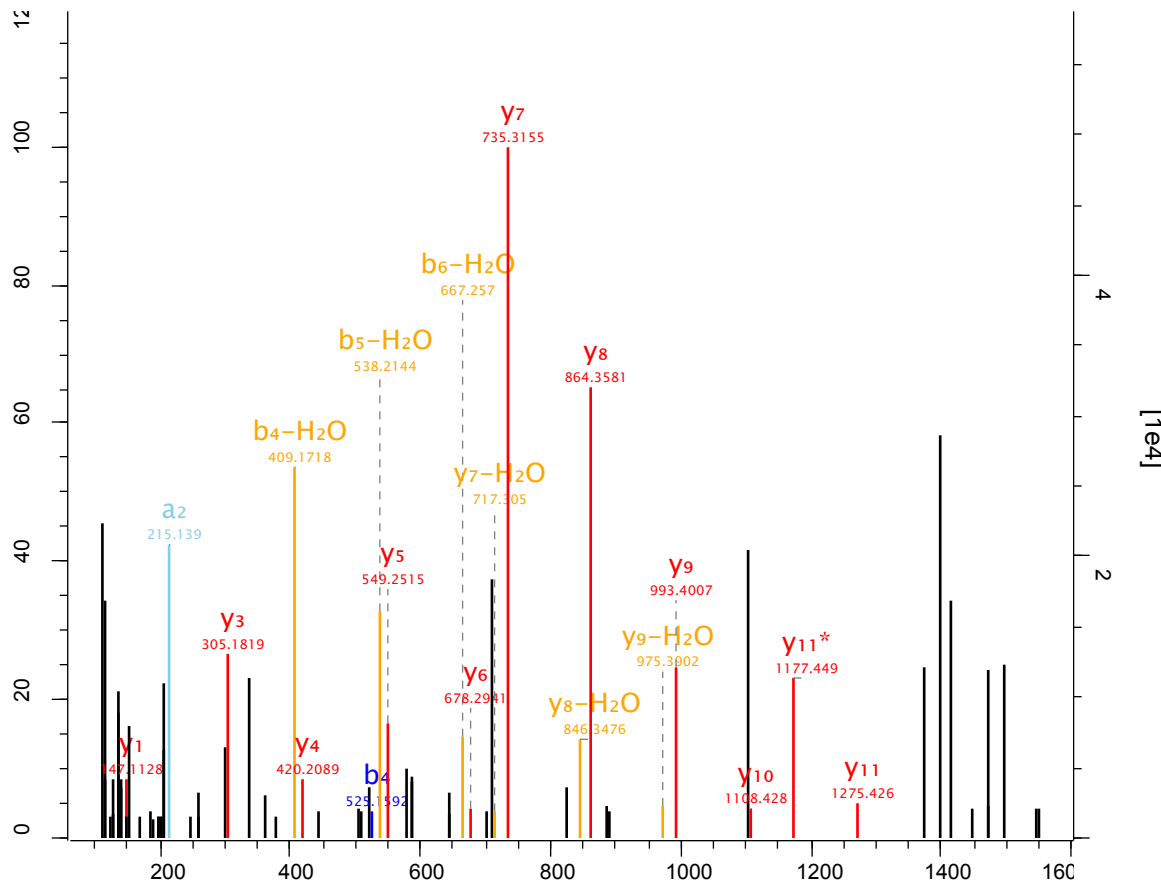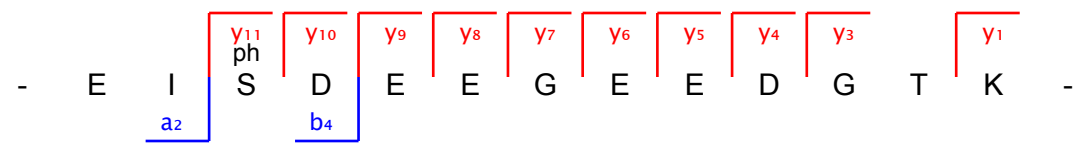

| Raw file | Scan | Method    | Score | m/z    |
|----------|------|-----------|-------|--------|
| 34_38    | 5339 | FTMS; HCD | 46.07 | 642.71 |

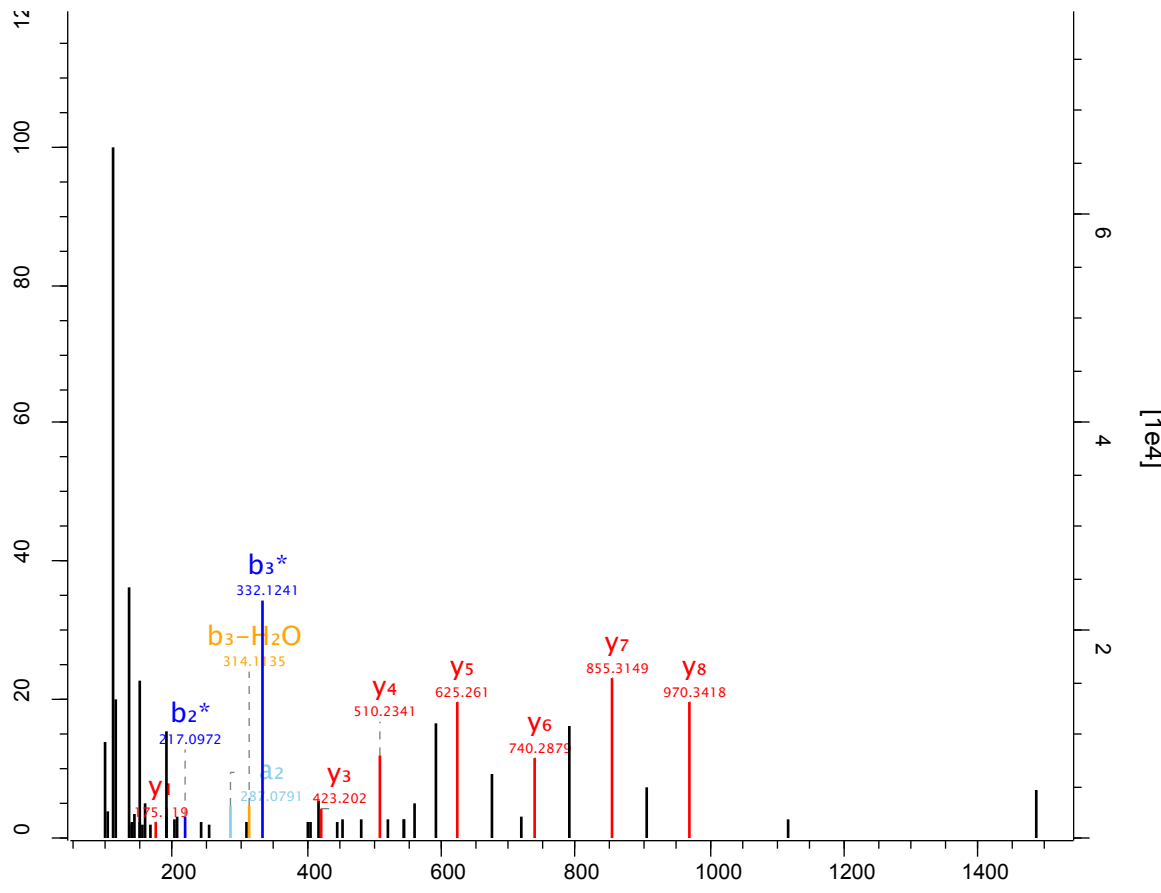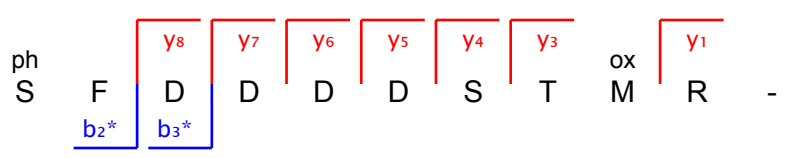

Raw file Scan Method Score m/z  
 34\_38 5593 FTMS; HCD 140.32 885.34

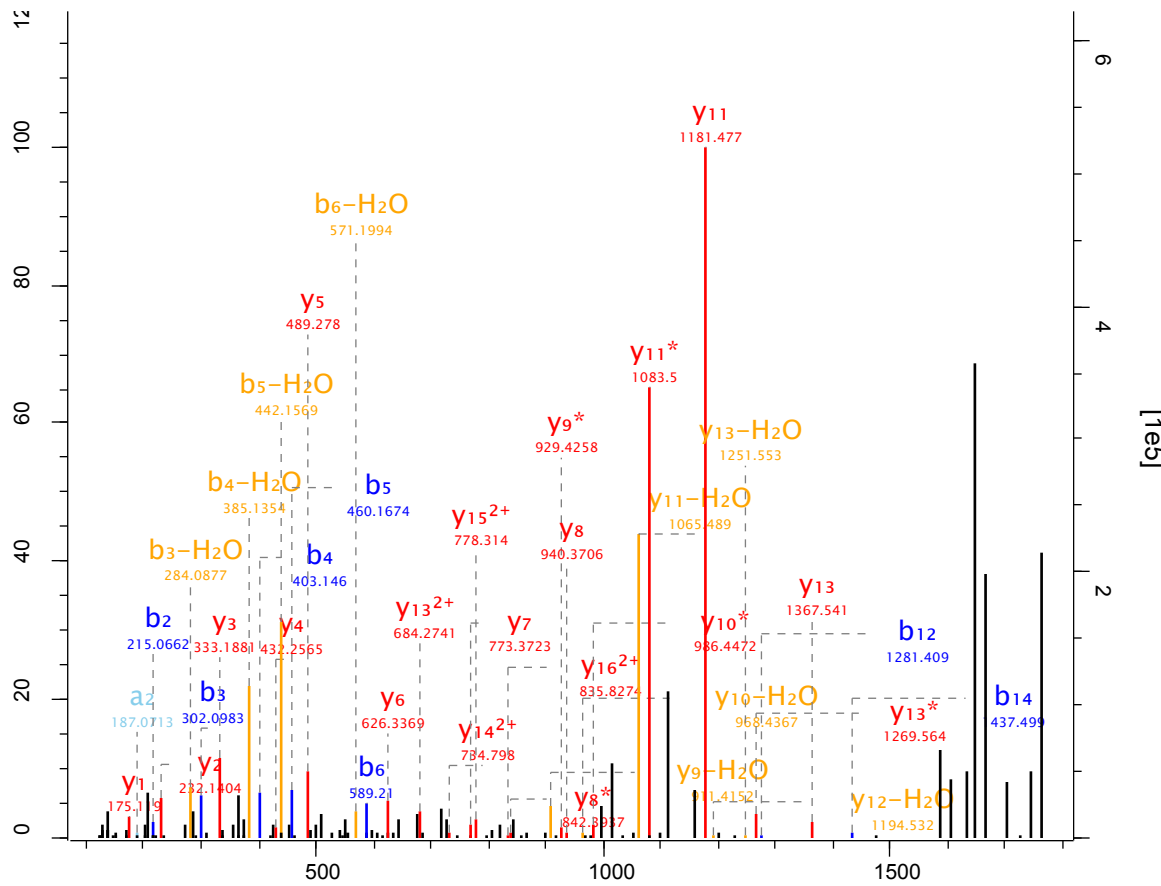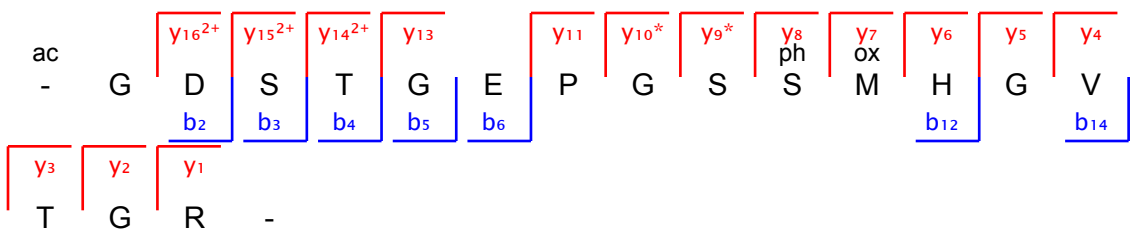

Raw file Scan Method Score m/z  
 34\_38 6008 FTMS; HCD 70.94 515.72

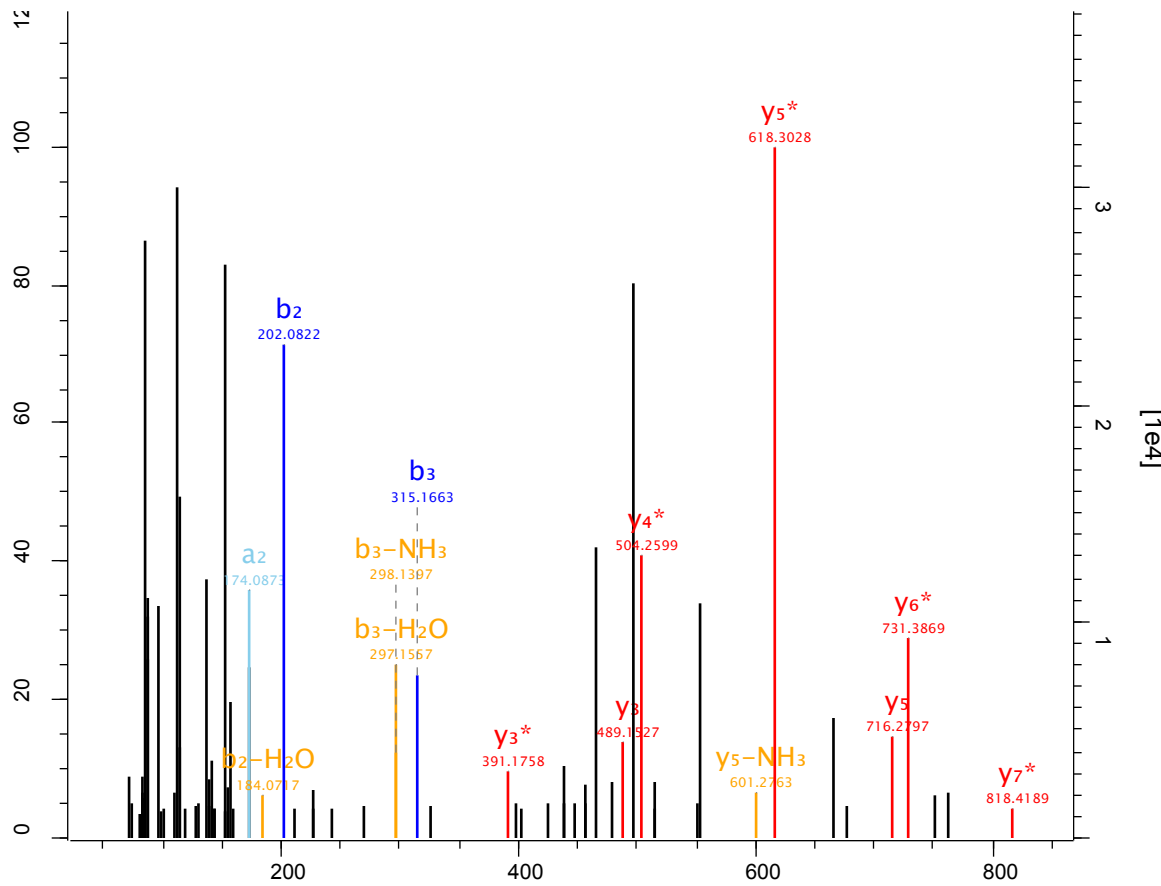

- N S L N I S ox M R -

Fragmentation labels:  $y_7^*$ ,  $y_6^*$ ,  $y_5$ ,  $y_4^*$ ,  $y_3$ ,  $y_3^{ph}$ ,  $b_2$ ,  $b_3$

Raw file Scan Method Score m/z  
 34\_38 6123 FTMS; HCD 62.09 750.77

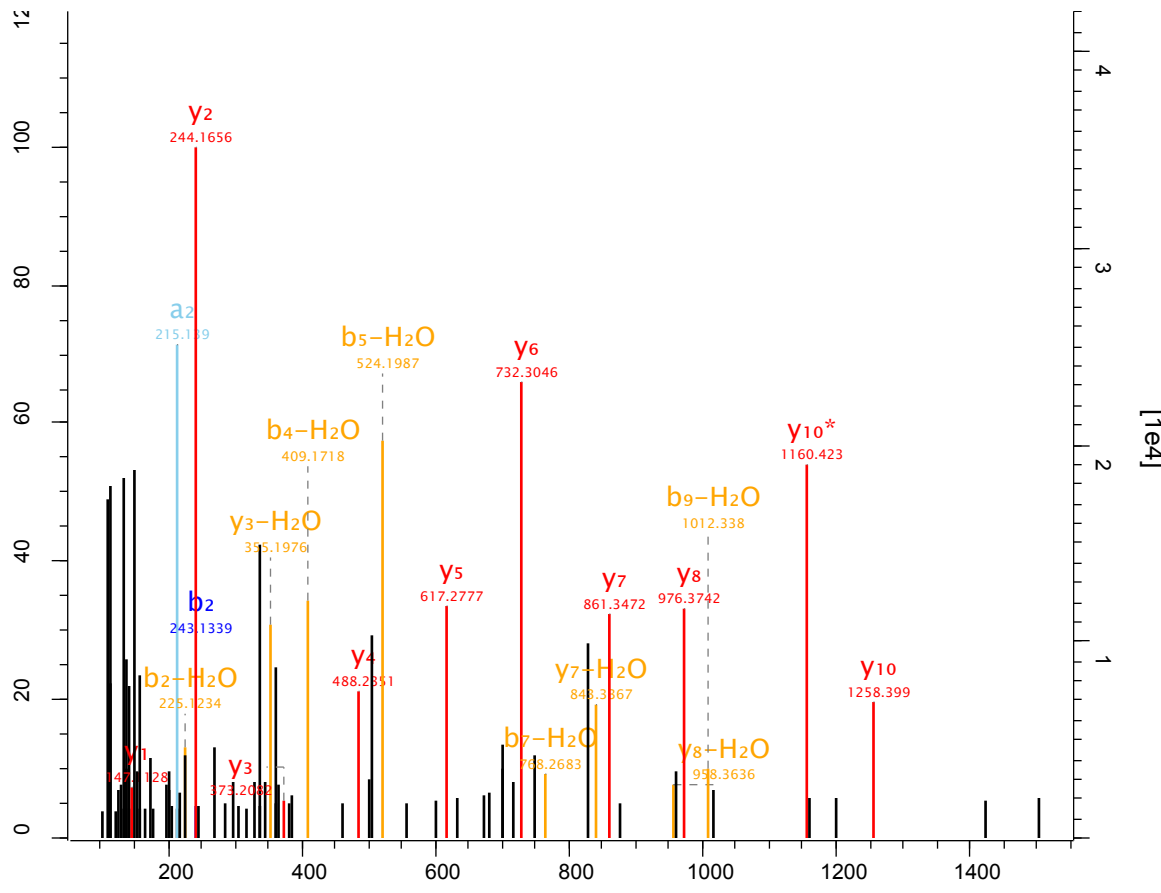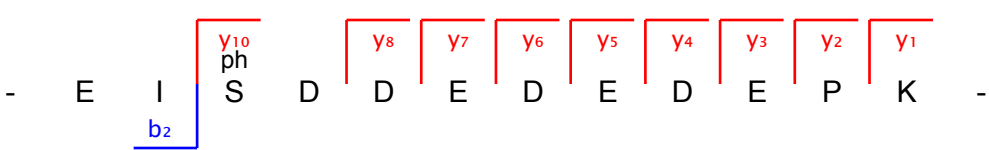



Raw file Scan Method Score m/z  
 34\_38 6568 FTMS; HCD 171.25 792.84

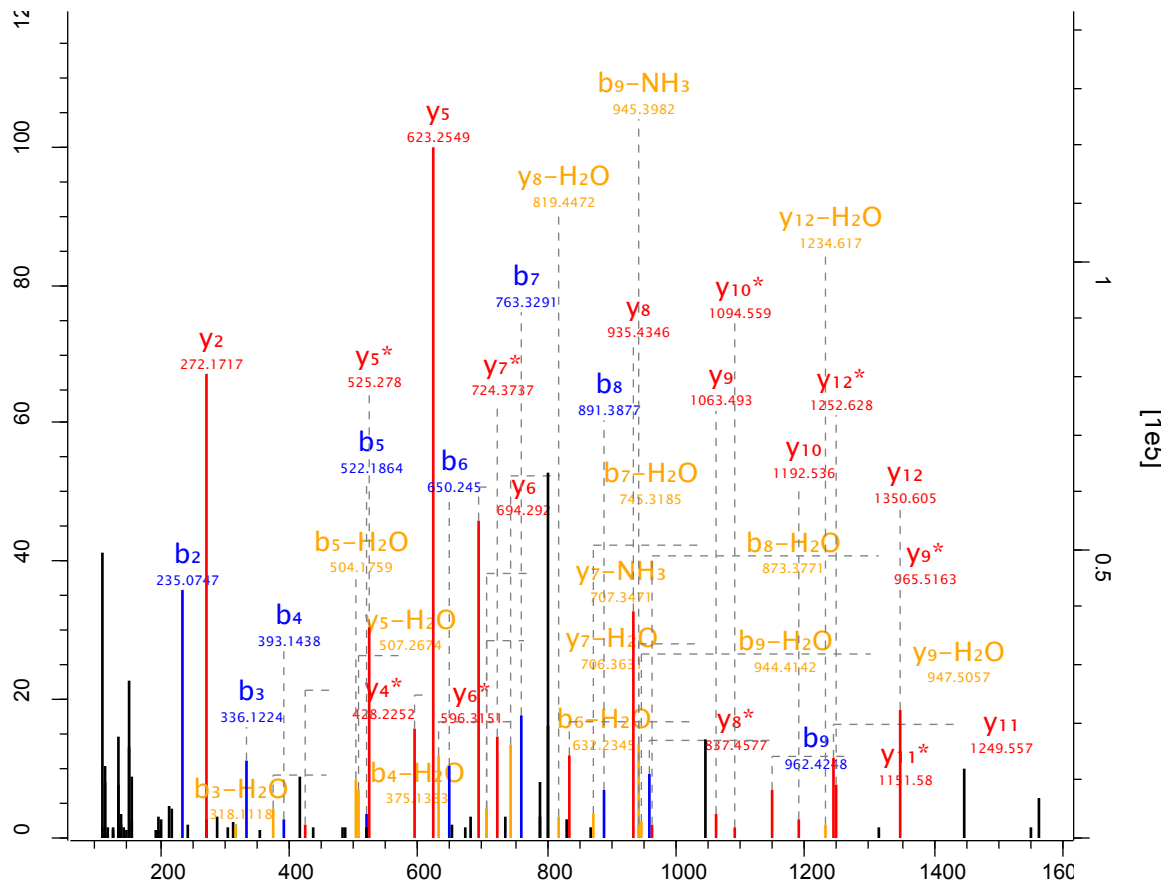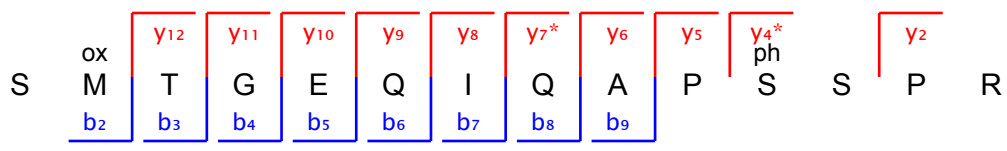

Raw file Scan Method Score m/z  
 34\_38 6834 FTMS; HCD 78.78 829.84

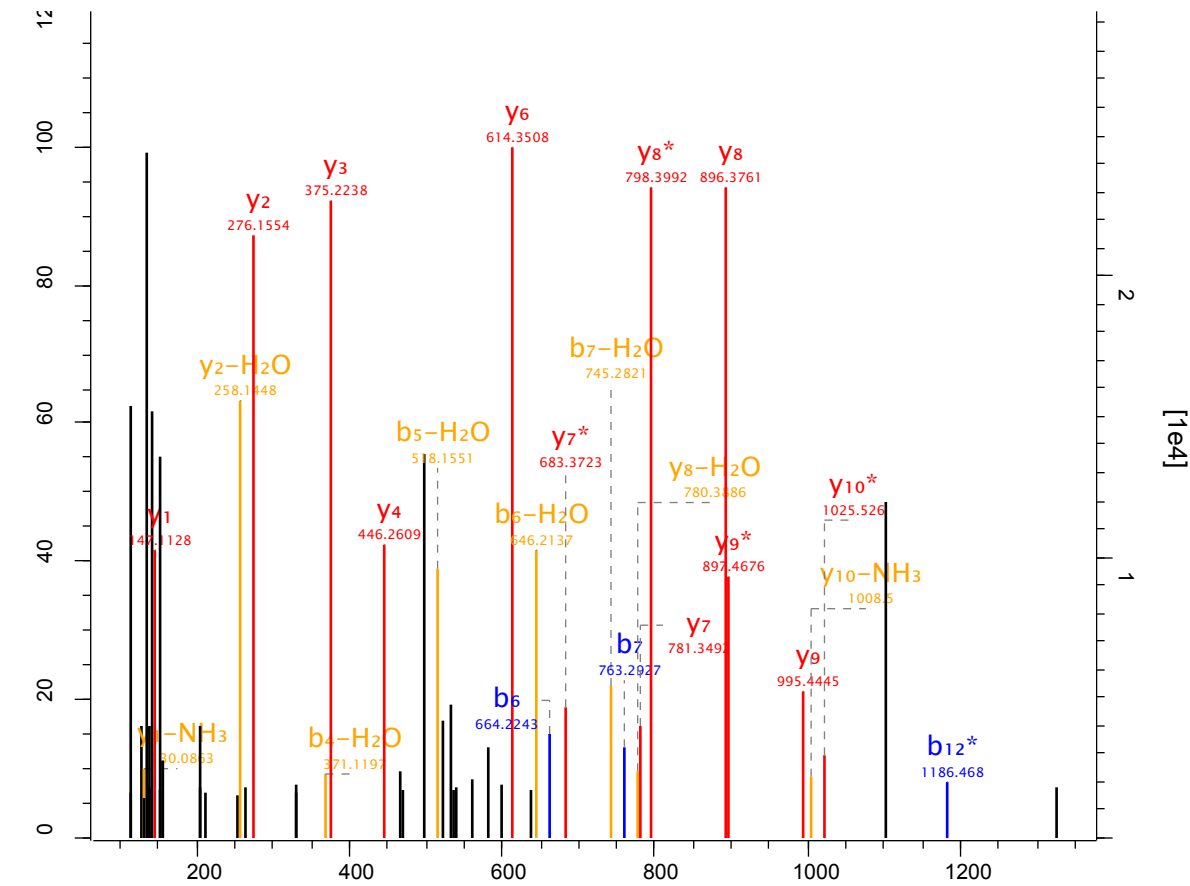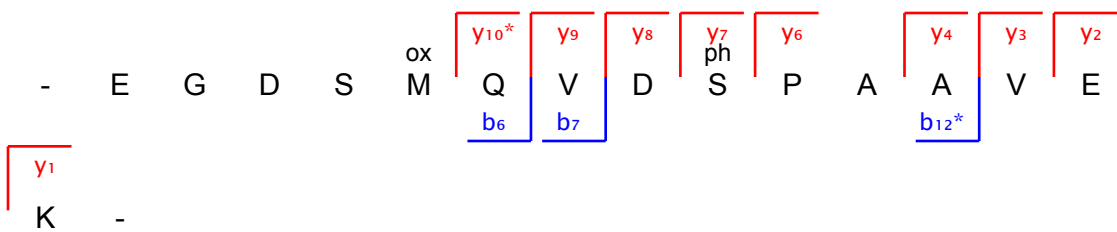

Raw file Scan Method Score m/z  
 34\_38 7175 FTMS; HCD 60.26 508.23

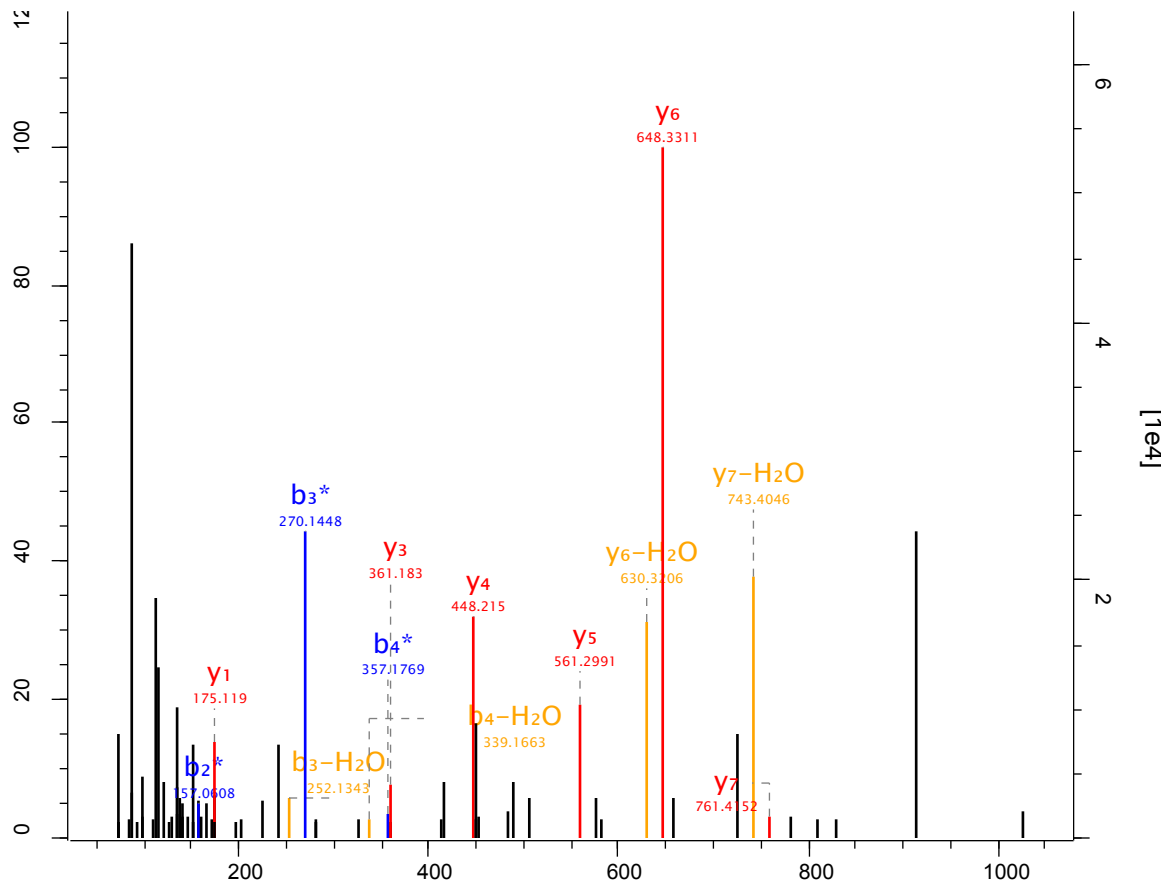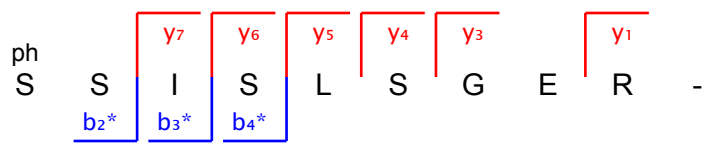

Raw file Scan Method Score m/z  
34\_38 7480 FTMS; HCD 45.08 512.24

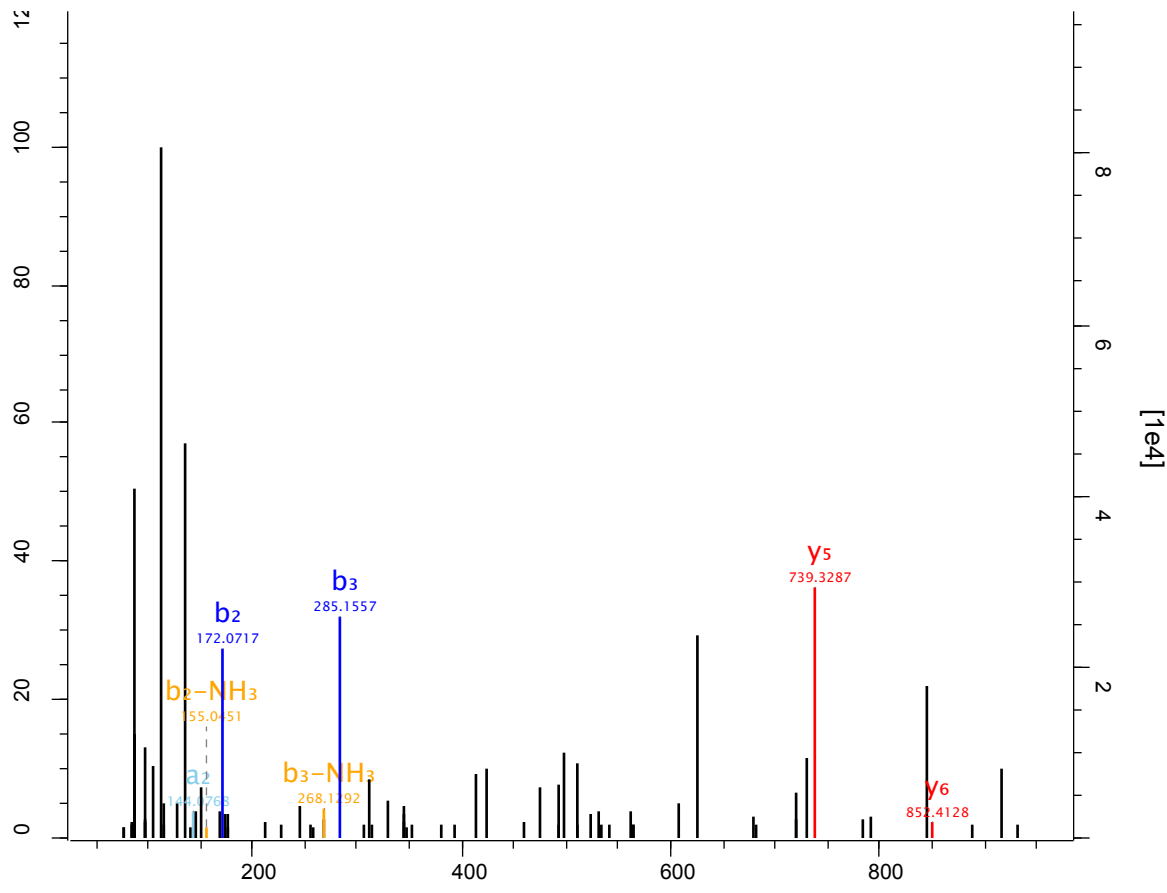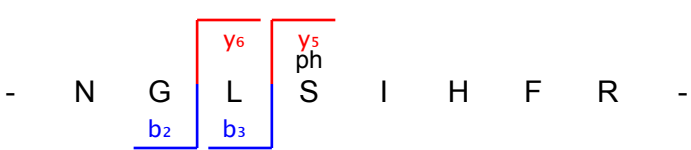

Raw file Scan Method Score m/z  
 34\_38 8058 FTMS; HCD 53.45 524.59

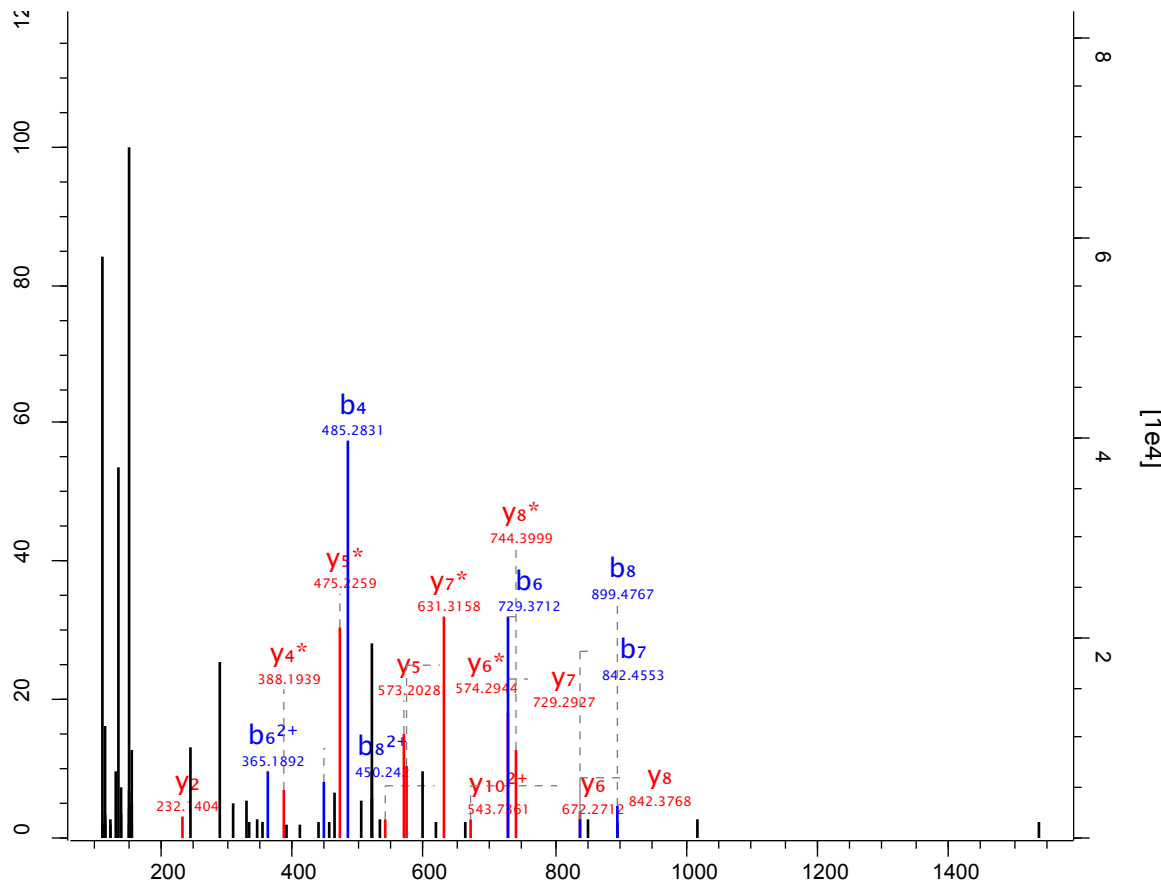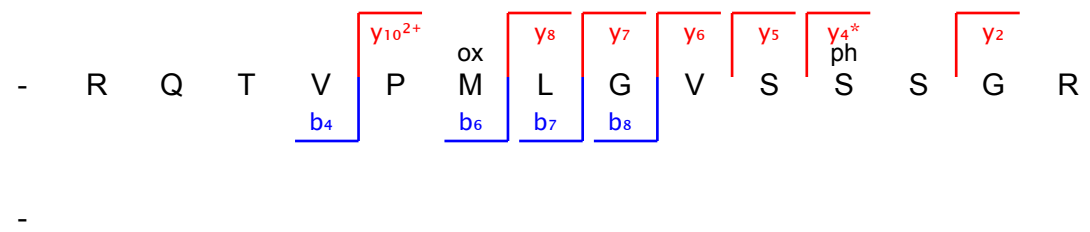

| Raw file | Scan | Method    | Score | m/z    |
|----------|------|-----------|-------|--------|
| 34_38    | 8346 | FTMS; HCD | 62.46 | 462.22 |

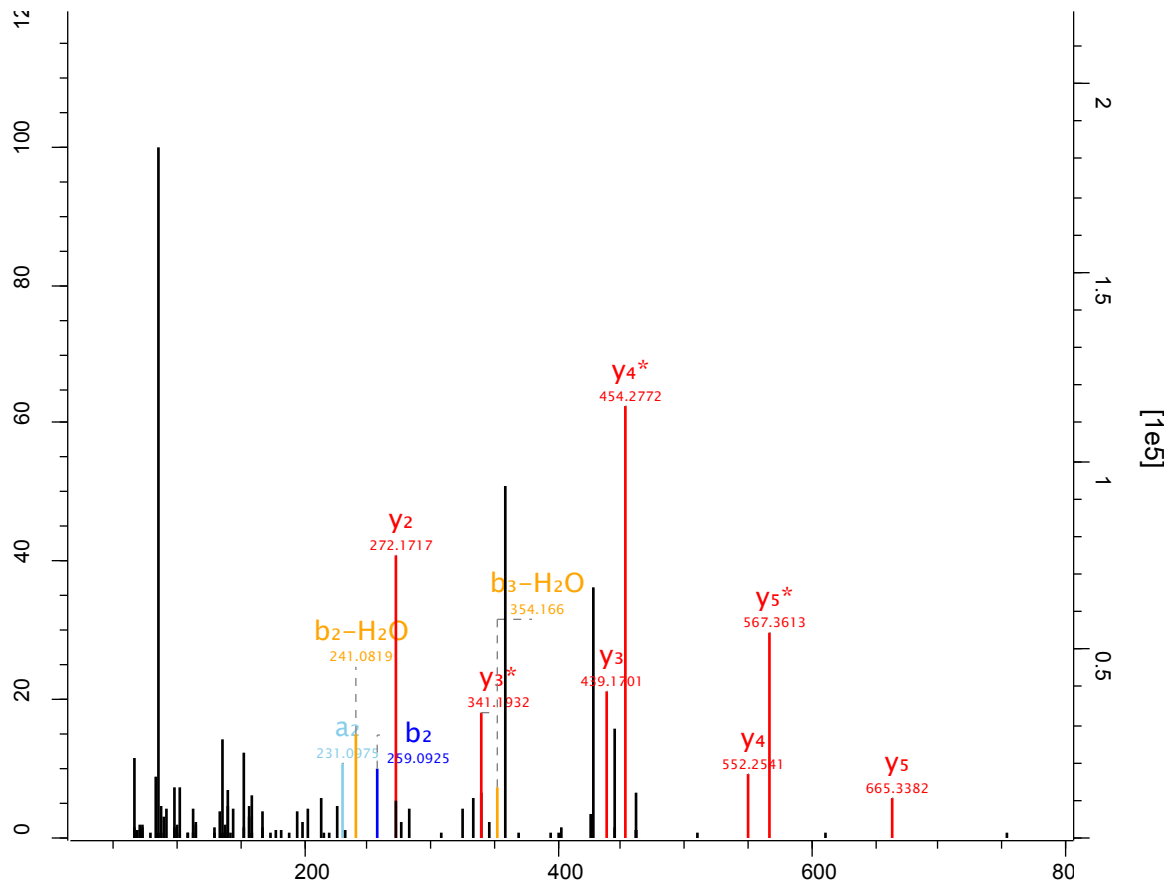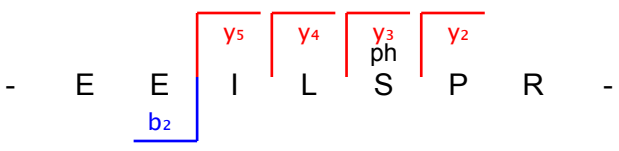

Raw file Scan Method Score m/z  
 34\_38 8544 FTMS; HCD 43.76 599.78

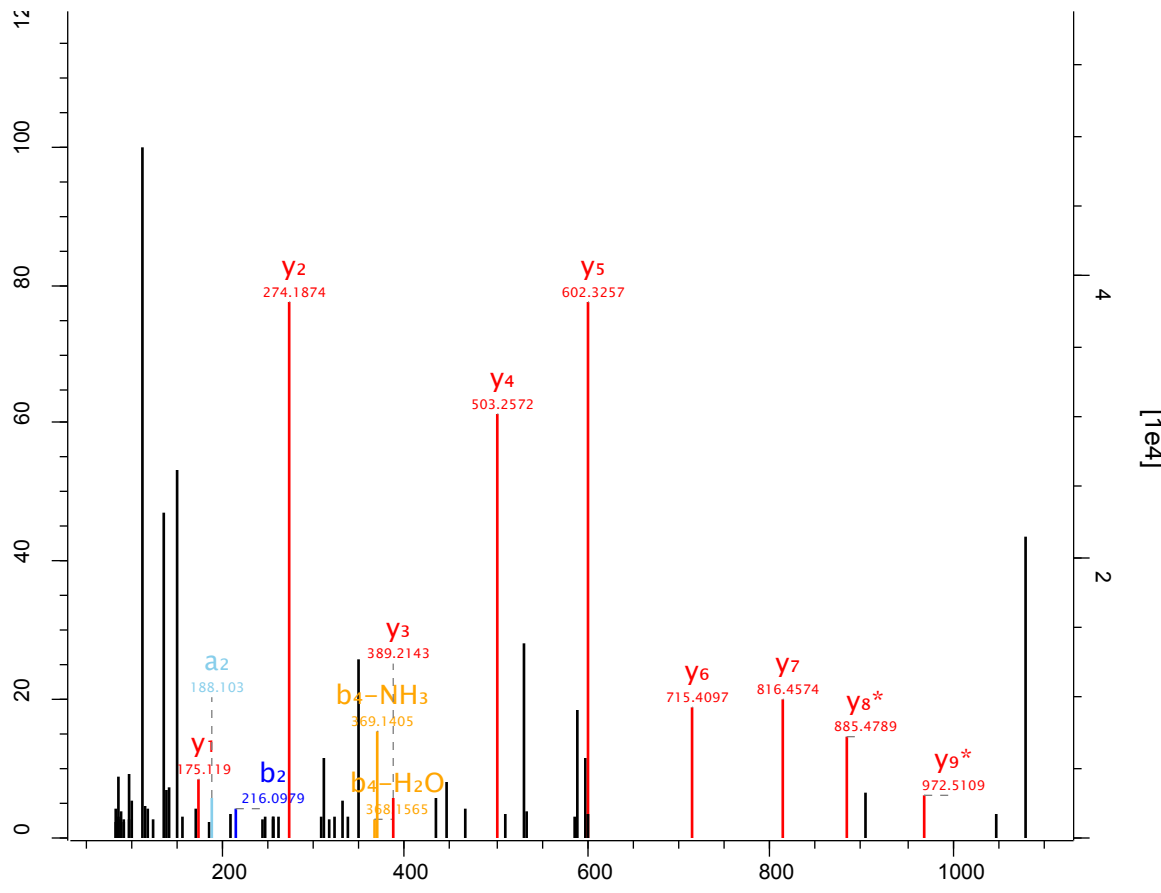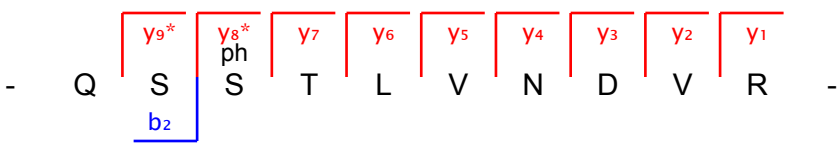

| Raw file | Scan | Method    | Score | m/z    |
|----------|------|-----------|-------|--------|
| 34_38    | 9689 | FTMS; HCD | 52.58 | 448.21 |

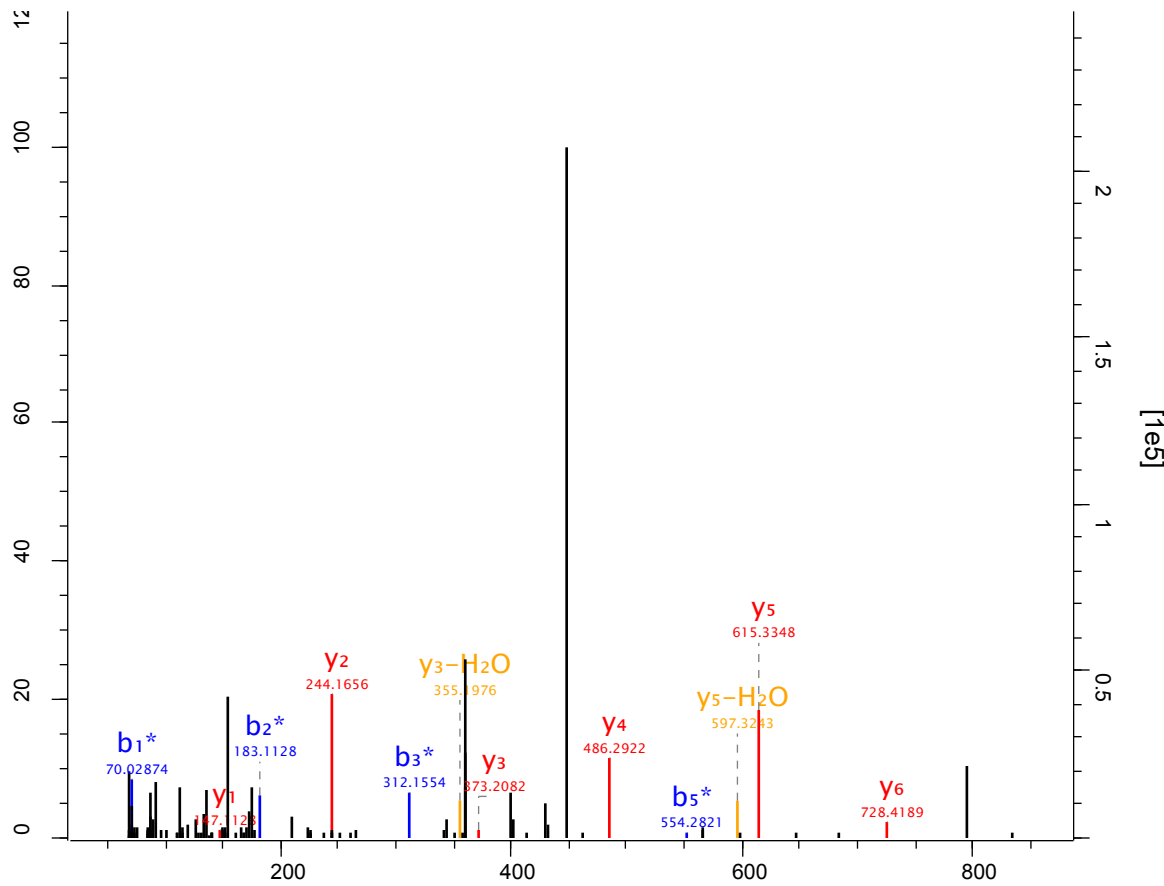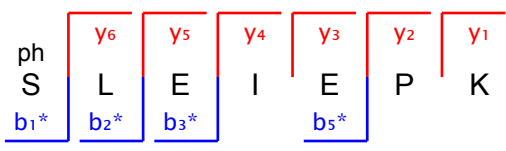



Raw file Scan Method Score m/z  
 Recip\_2\_18\_25 11418 FTMS; HCD 253.8 818.88

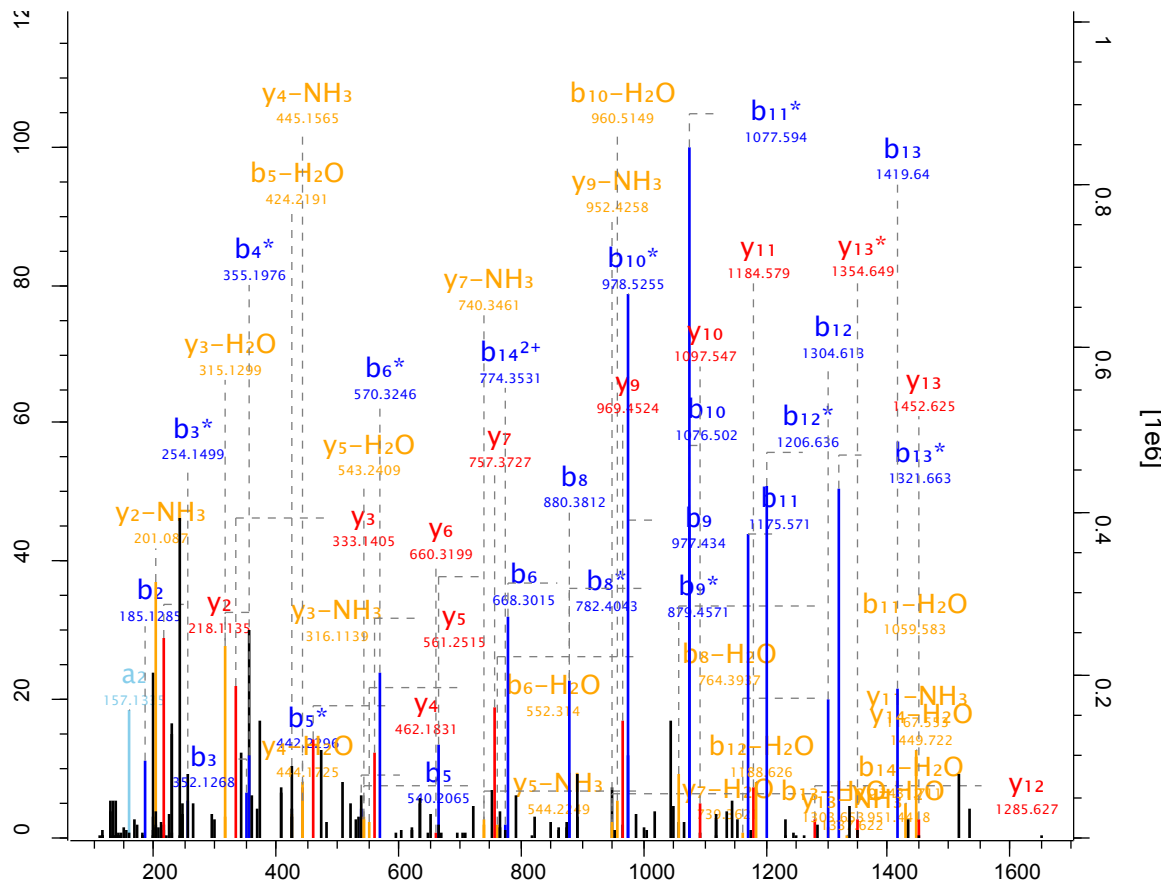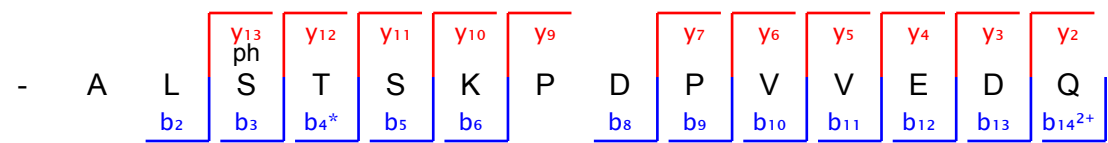

A -

| Raw file      | Scan | Method    | Score | m/z    |
|---------------|------|-----------|-------|--------|
| Recip_2_18_25 | 1258 | FTMS; HCD | 62.09 | 425.18 |

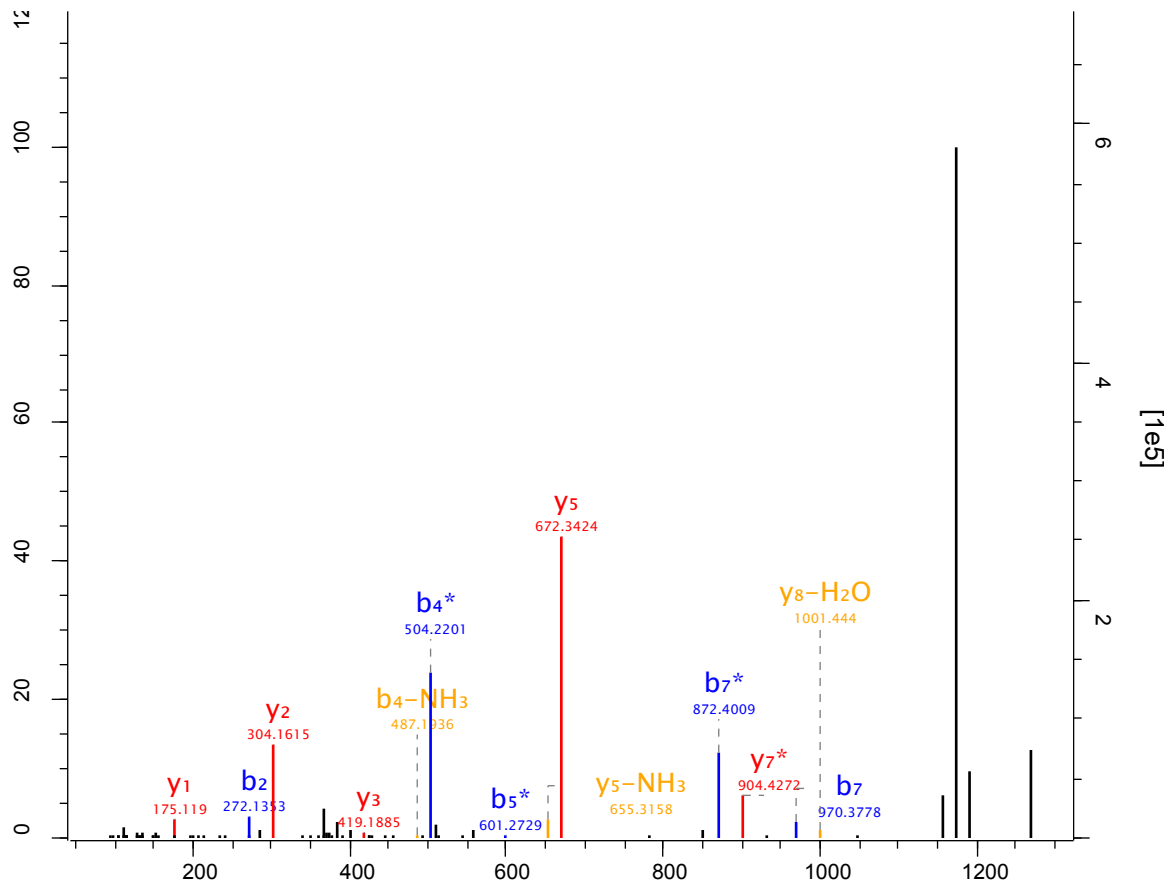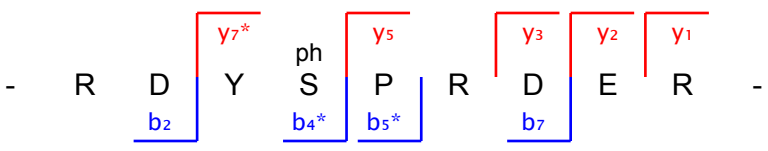

| Raw file      | Scan | Method    | Score | m/z    |
|---------------|------|-----------|-------|--------|
| Recip_2_18_25 | 1340 | FTMS; HCD | 72.89 | 451.86 |

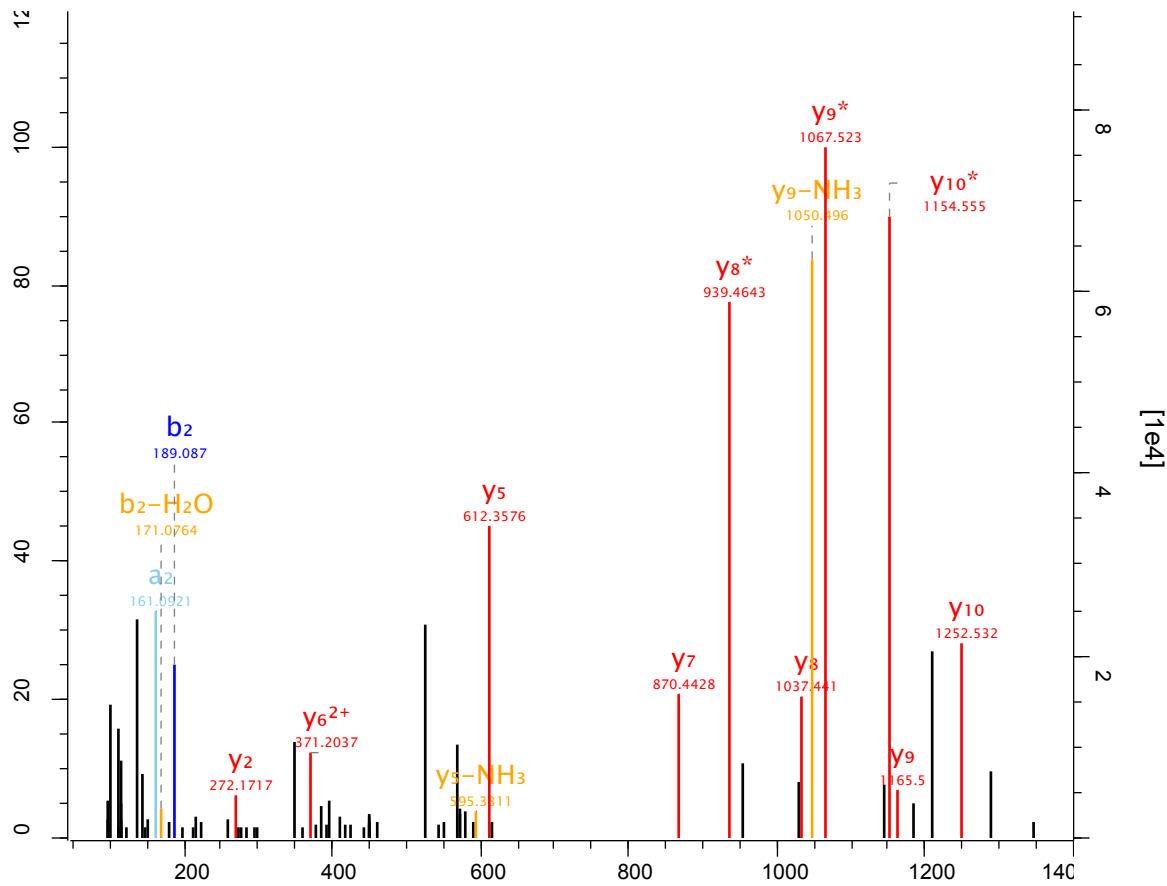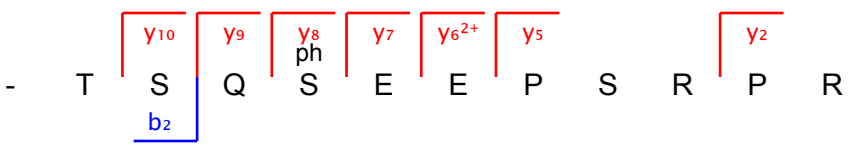

| Raw file      | Scan | Method    | Score  | m/z    |
|---------------|------|-----------|--------|--------|
| Recip_2_18_25 | 1587 | FTMS; HCD | 142.83 | 580.74 |

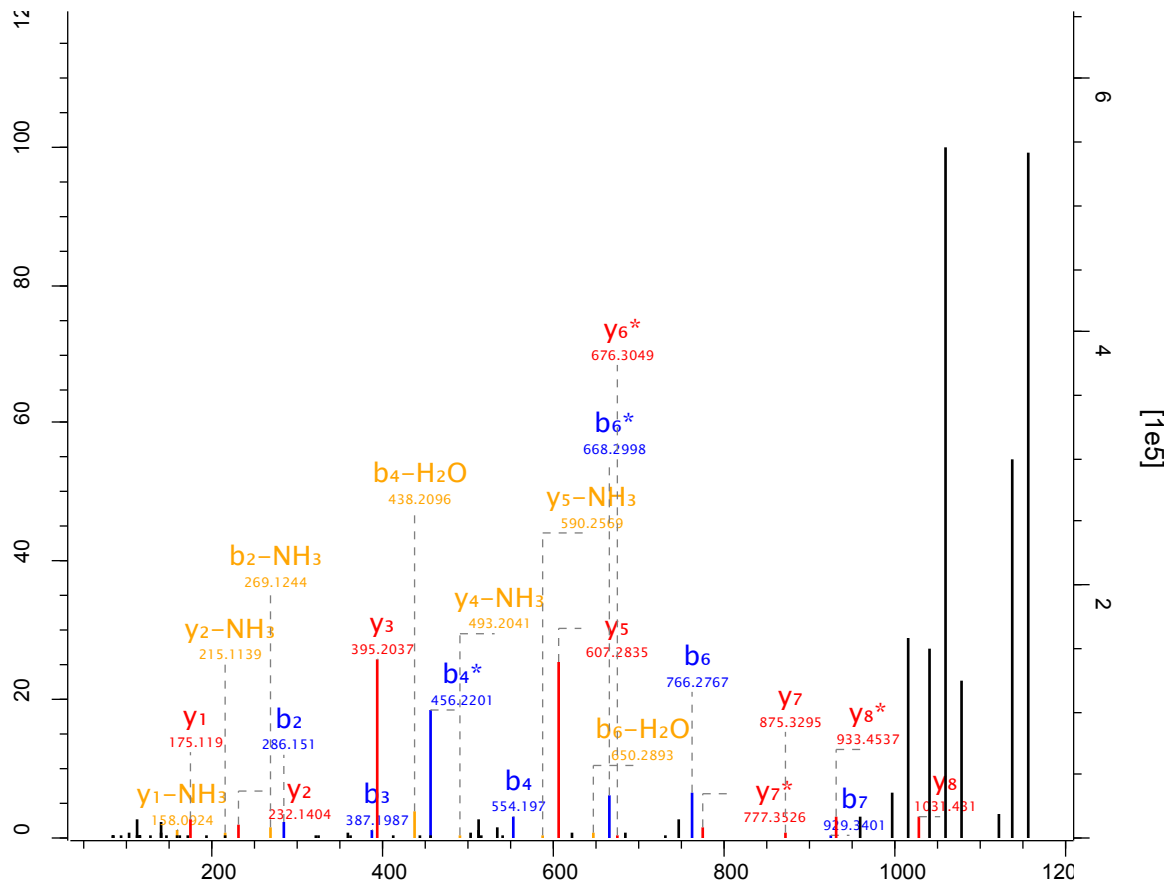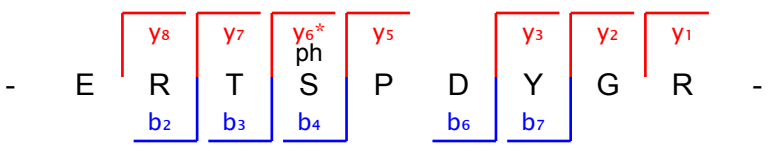

| Raw file      | Scan | Method    | Score | m/z    |
|---------------|------|-----------|-------|--------|
| Recip_2_18_25 | 1615 | FTMS; HCD | 51.94 | 423.54 |

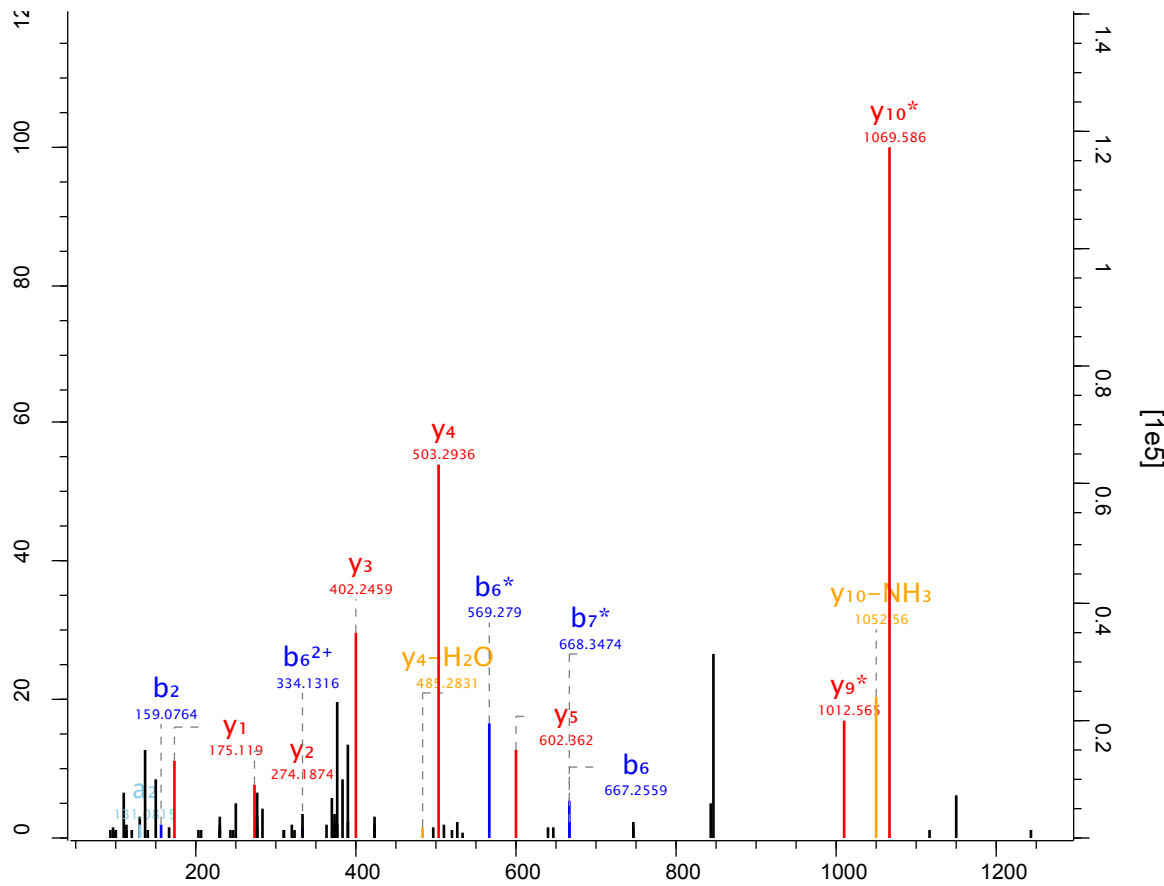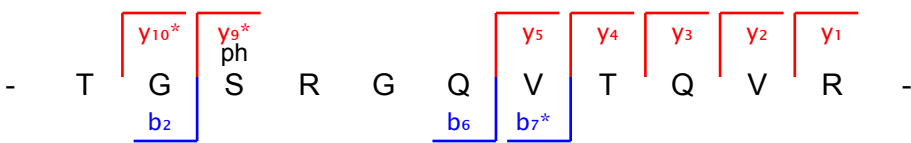

| Raw file      | Scan | Method    | Score | m/z    |
|---------------|------|-----------|-------|--------|
| Recip_2_18_25 | 2129 | FTMS; HCD | 97.1  | 568.56 |

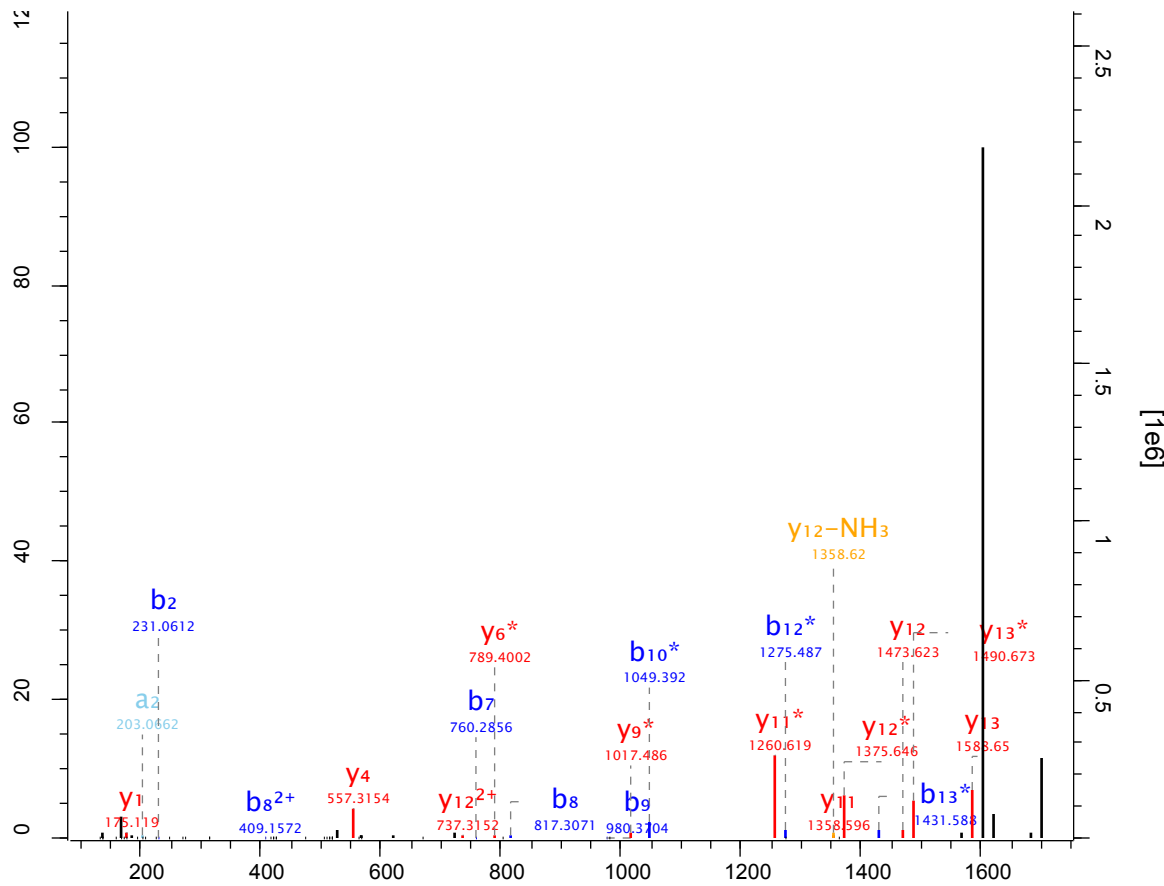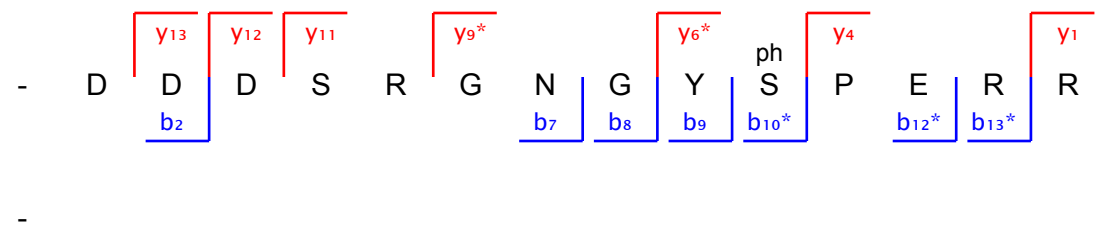

| Raw file      | Scan | Method    | Score | m/z    |
|---------------|------|-----------|-------|--------|
| Recip_2_18_25 | 3057 | FTMS; HCD | 61.34 | 515.24 |

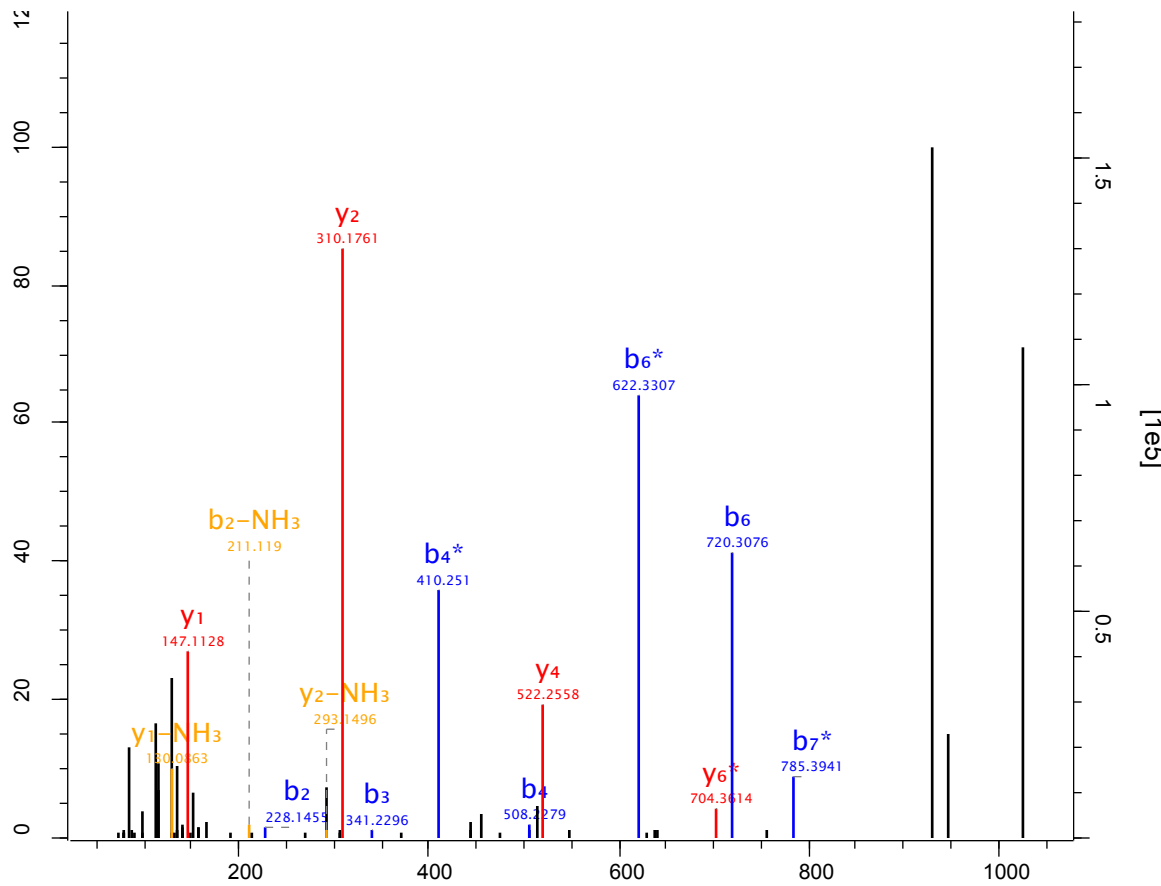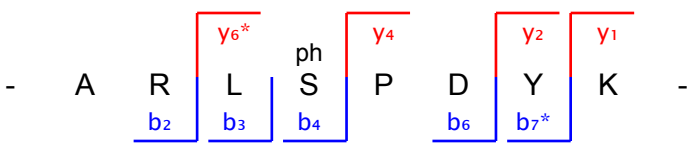

| Raw file      | Scan | Method    | Score  | m/z    |
|---------------|------|-----------|--------|--------|
| Recip_2_18_25 | 5769 | FTMS; HCD | 151.22 | 504.69 |

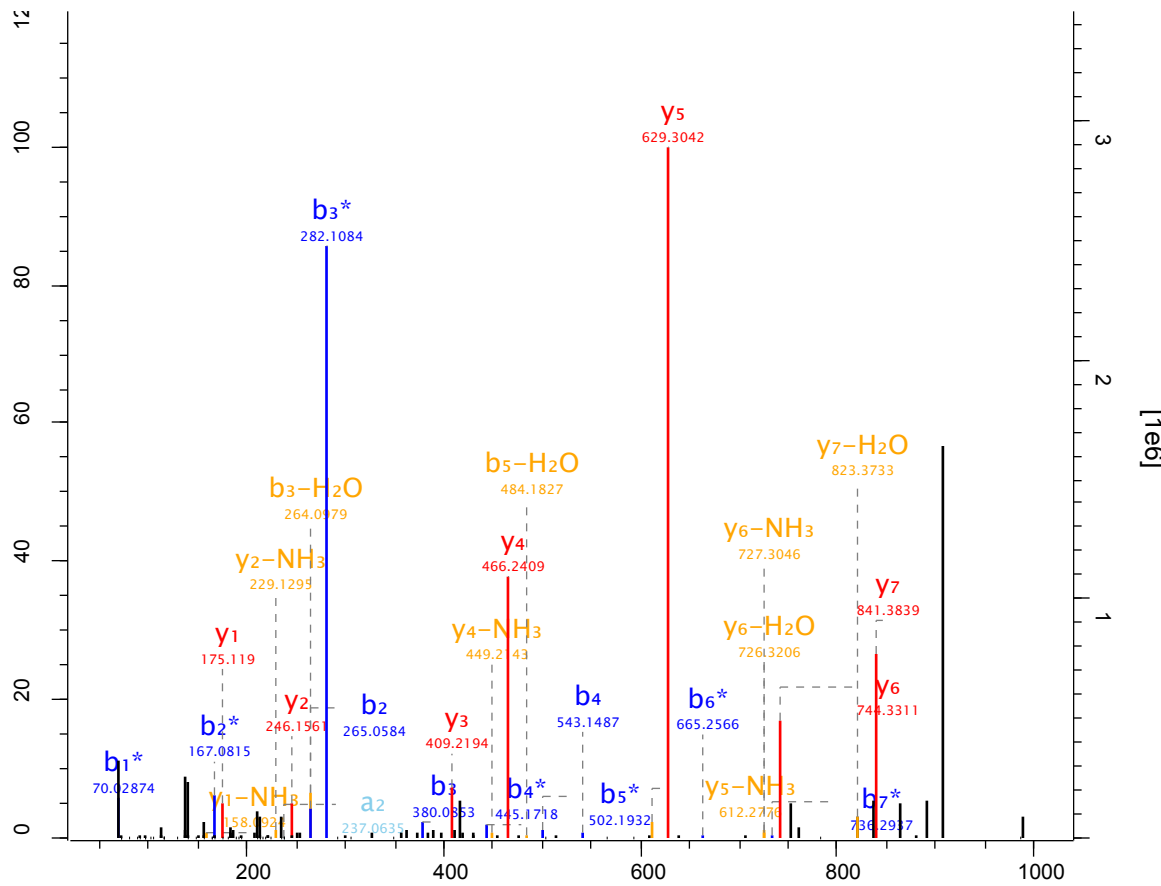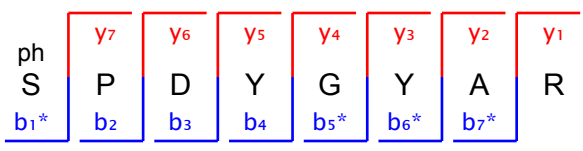



Raw file Scan Method Score m/z  
 Recip\_2\_18\_25 5841 FTMS; HCD 113.65 591.79

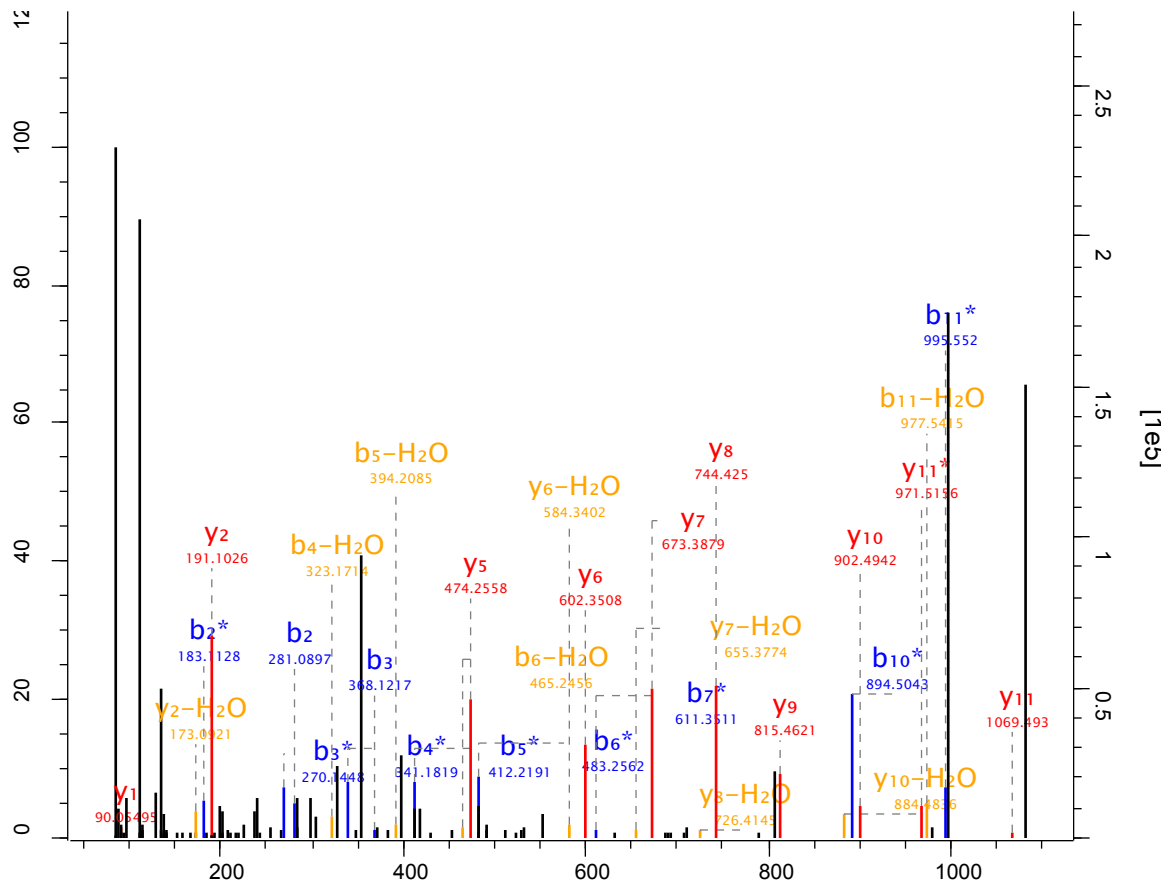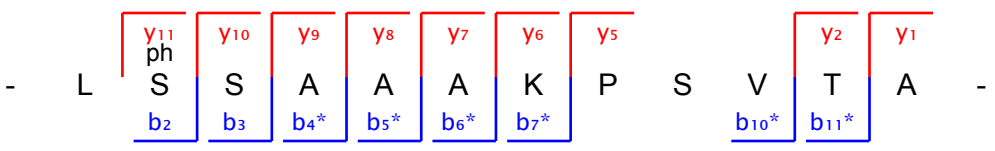

Raw file Scan Method Score m/z  
 Recip\_2\_18\_25 7870 FTMS; HCD 104.88 736.32

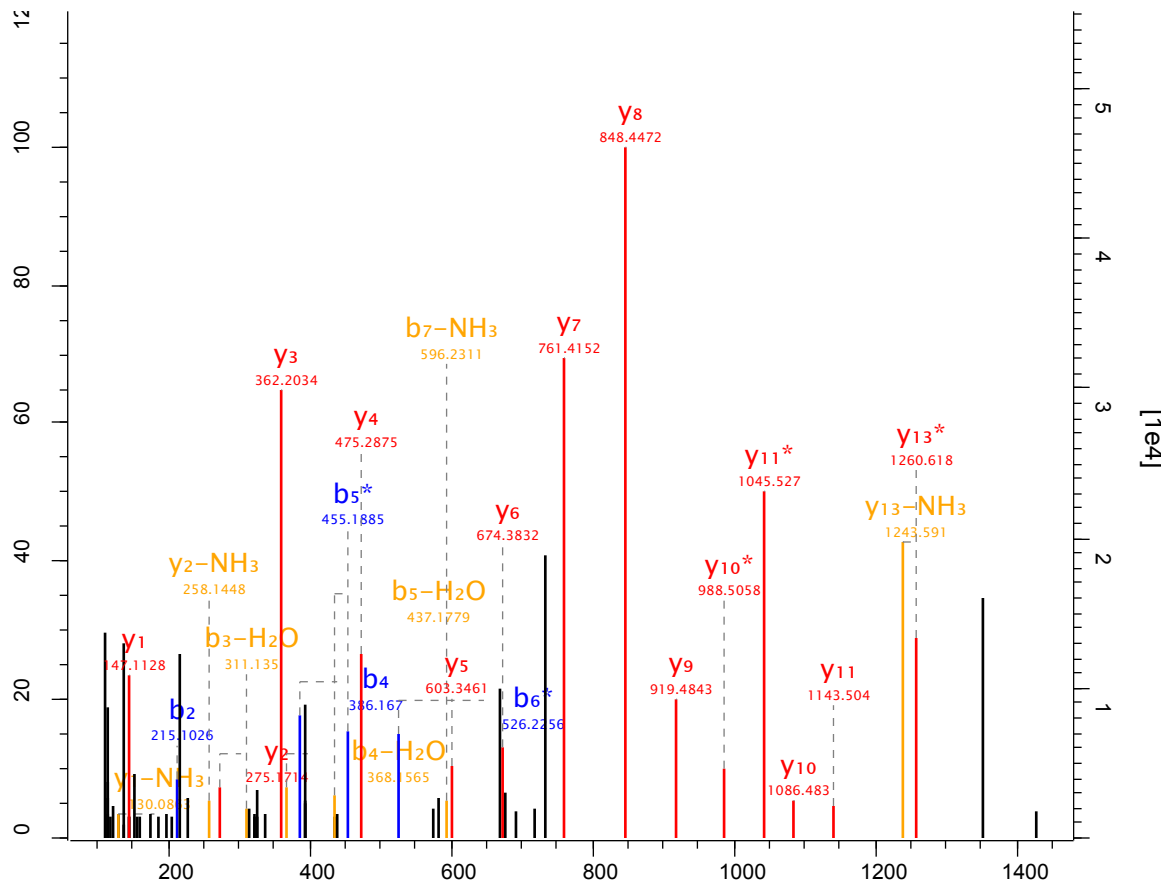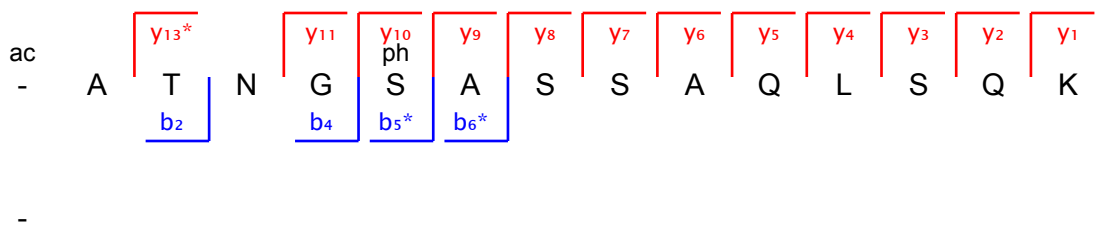

Raw file Scan Method Score m/z  
 Recip\_2\_25\_30 13526 FTMS; HCD 48.98 528.25

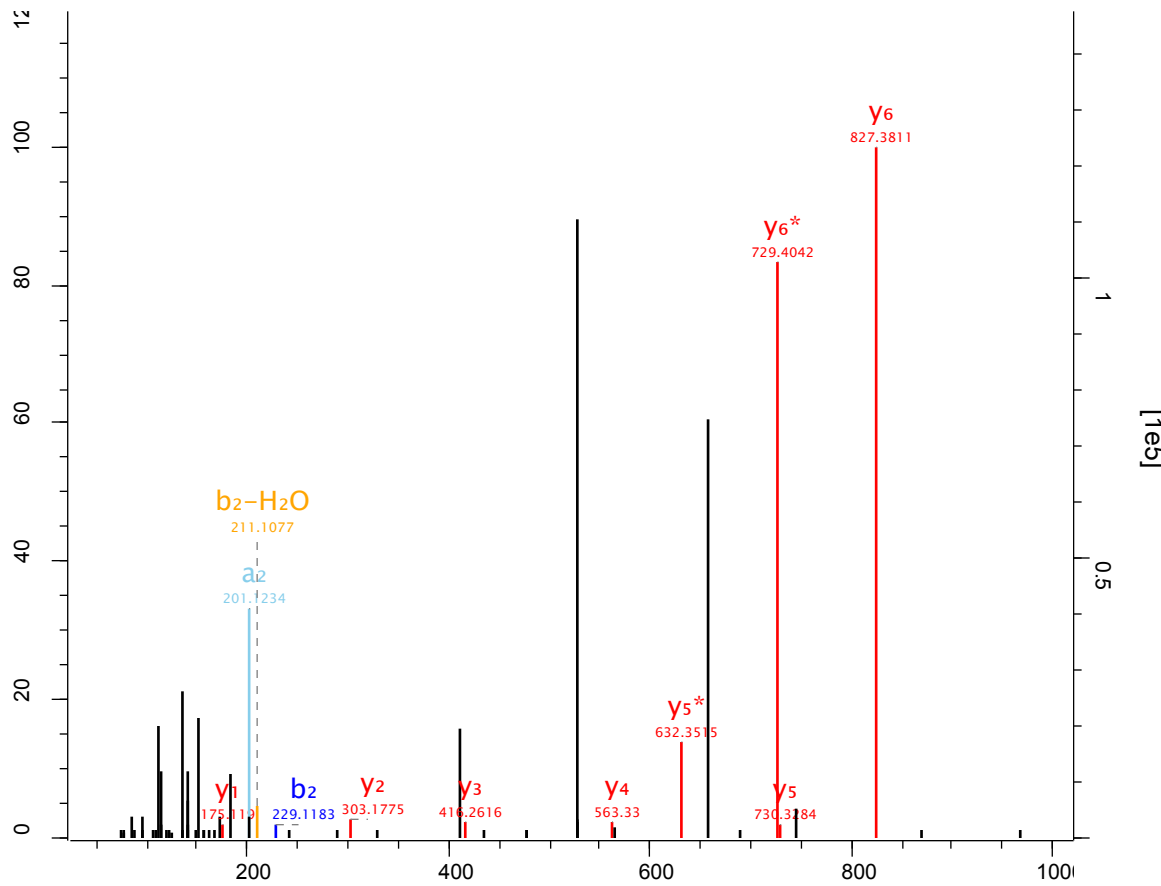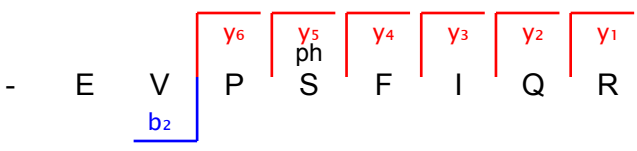

Raw file Scan Method Score m/z  
 Recip\_2\_30\_34 3913 FTMS; HCD 91.91 459.2

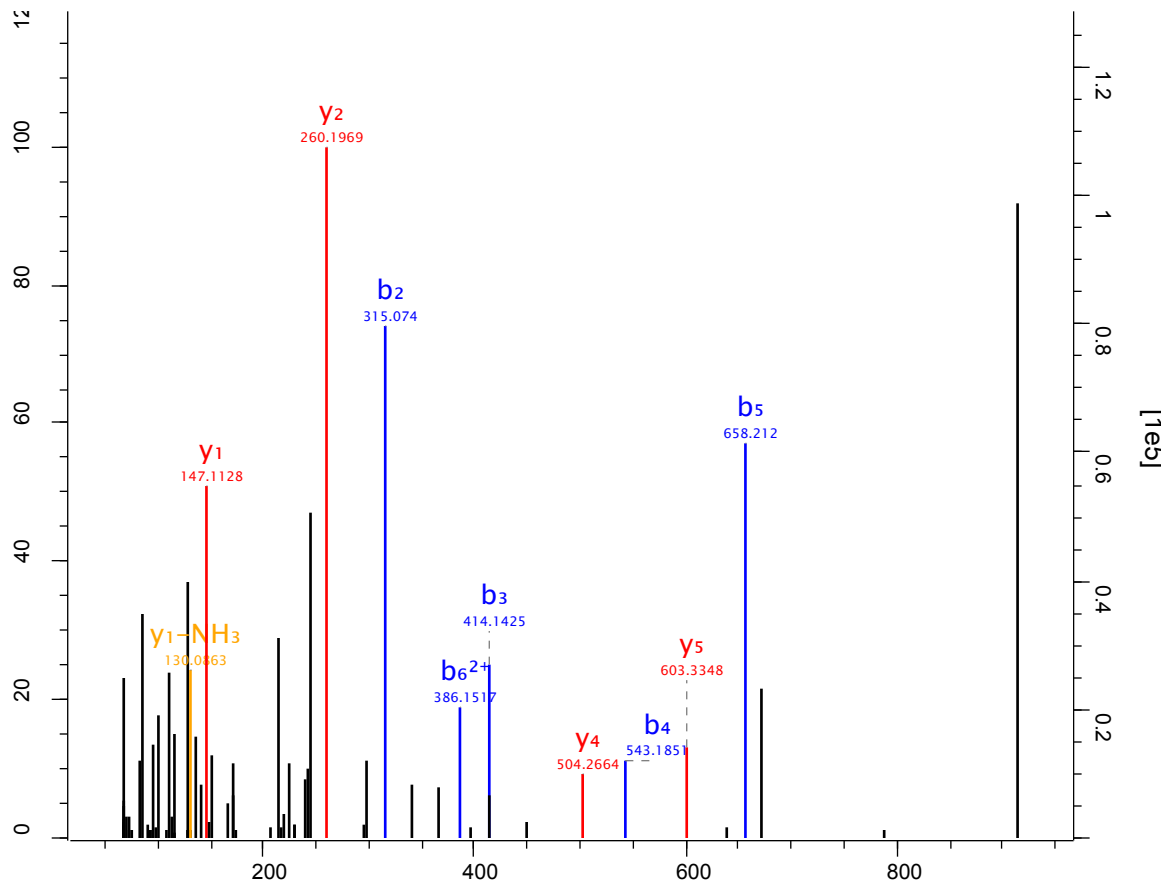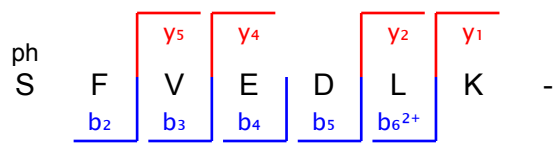

Raw file Scan Method Score m/z  
 Recip\_2\_34\_38 10001 FTMS; HCD 204.13 716.26

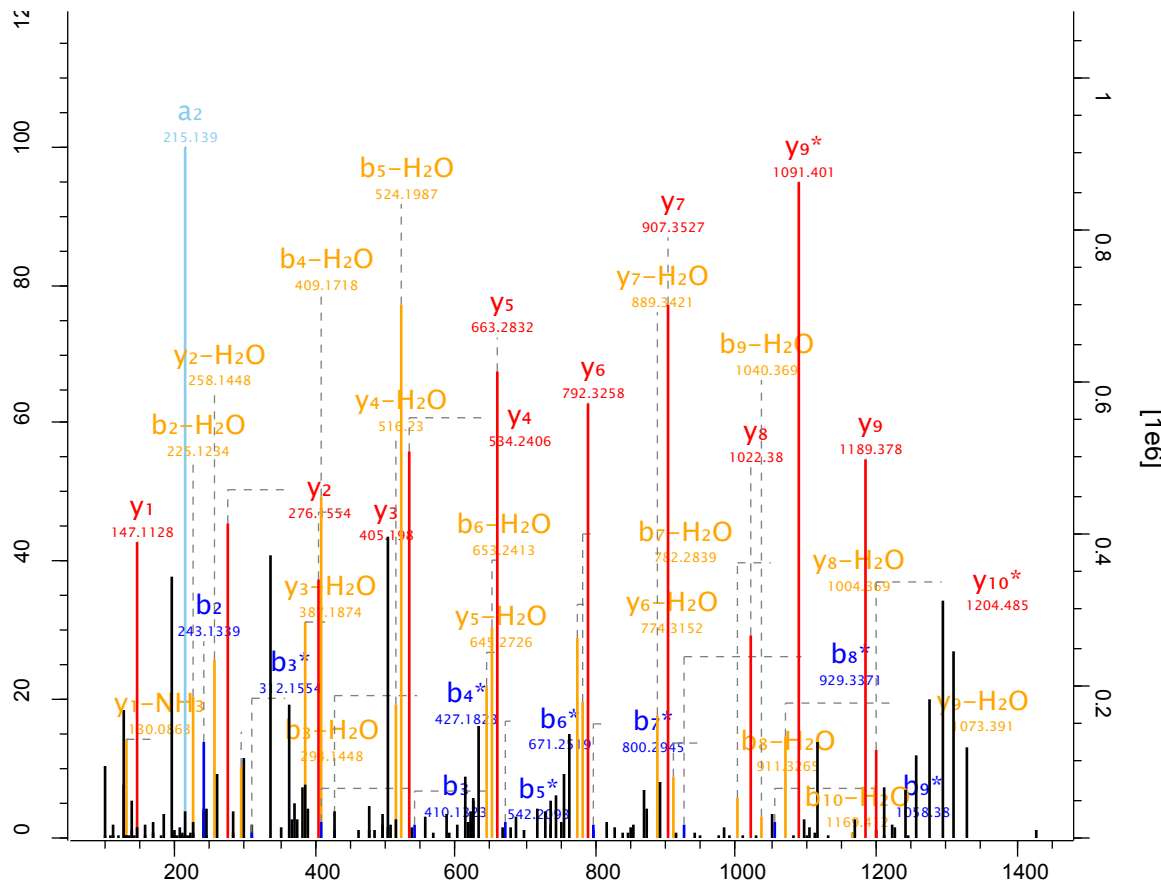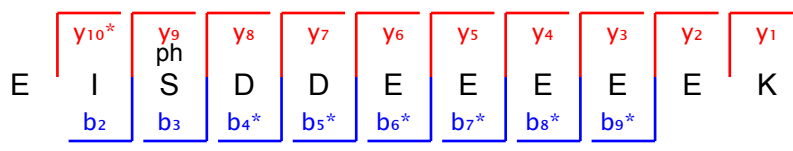



Raw file Scan Method Score m/z  
 Recip\_2\_34\_38 10343 FTMS; HCD 59.23 667.35

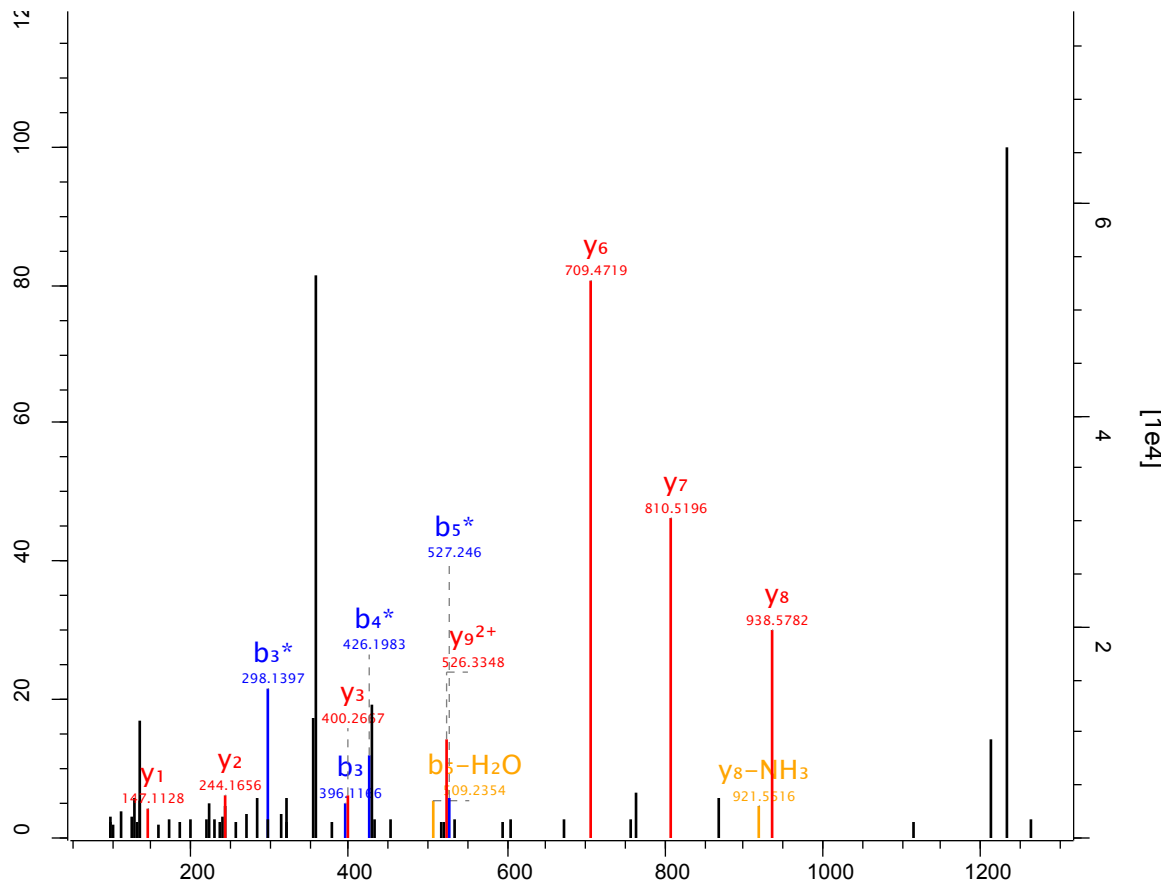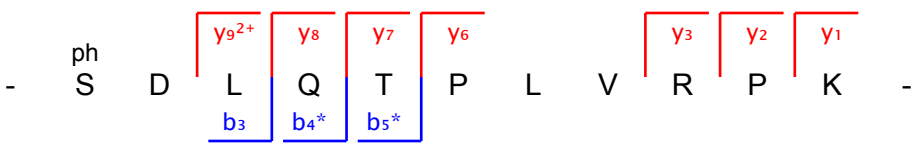

Raw file Scan Method Score m/z  
 Recip\_2\_34\_38 10589 FTMS; HCD 65.42 594.56

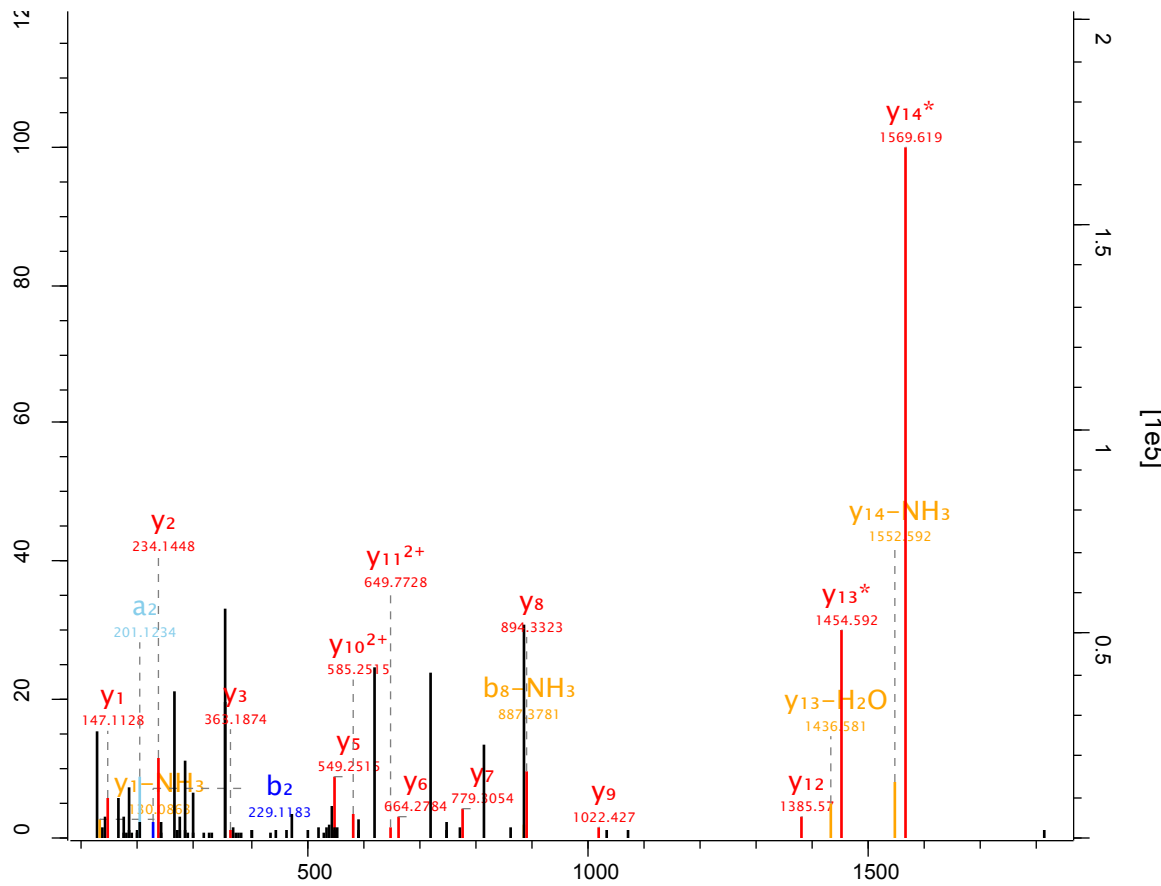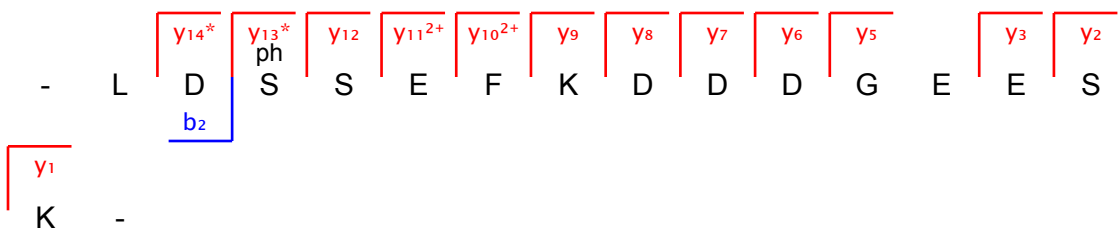



Raw file Scan Method Score m/z  
 Recip\_2\_34\_38 10670 FTMS; HCD 100.02 649.27

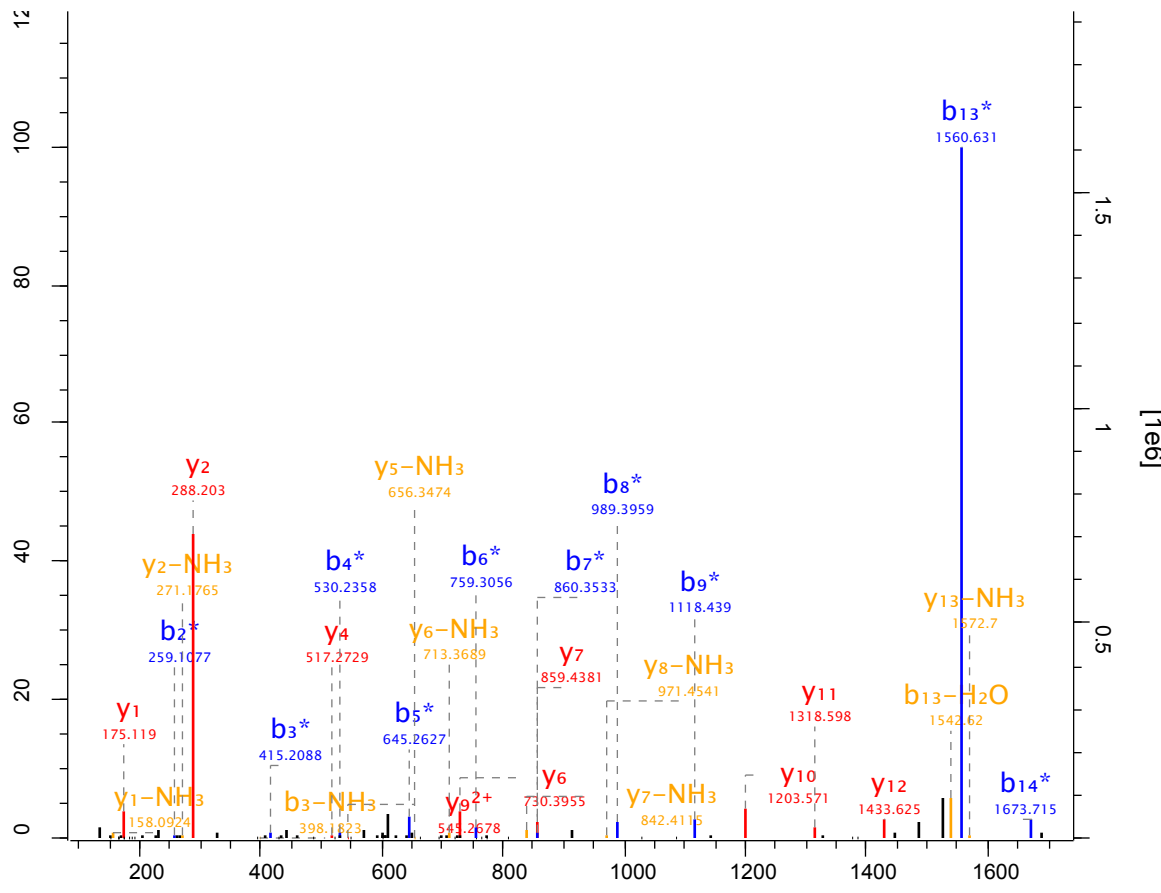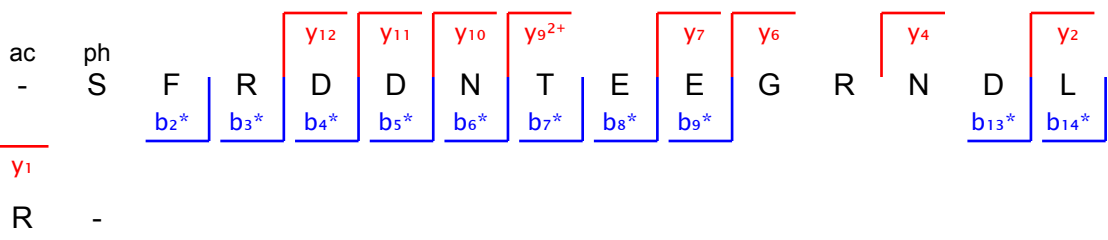

Raw file Scan Method Score m/z  
 Recip\_2\_34\_38 10759 FTMS; HCD 157.73 704.32

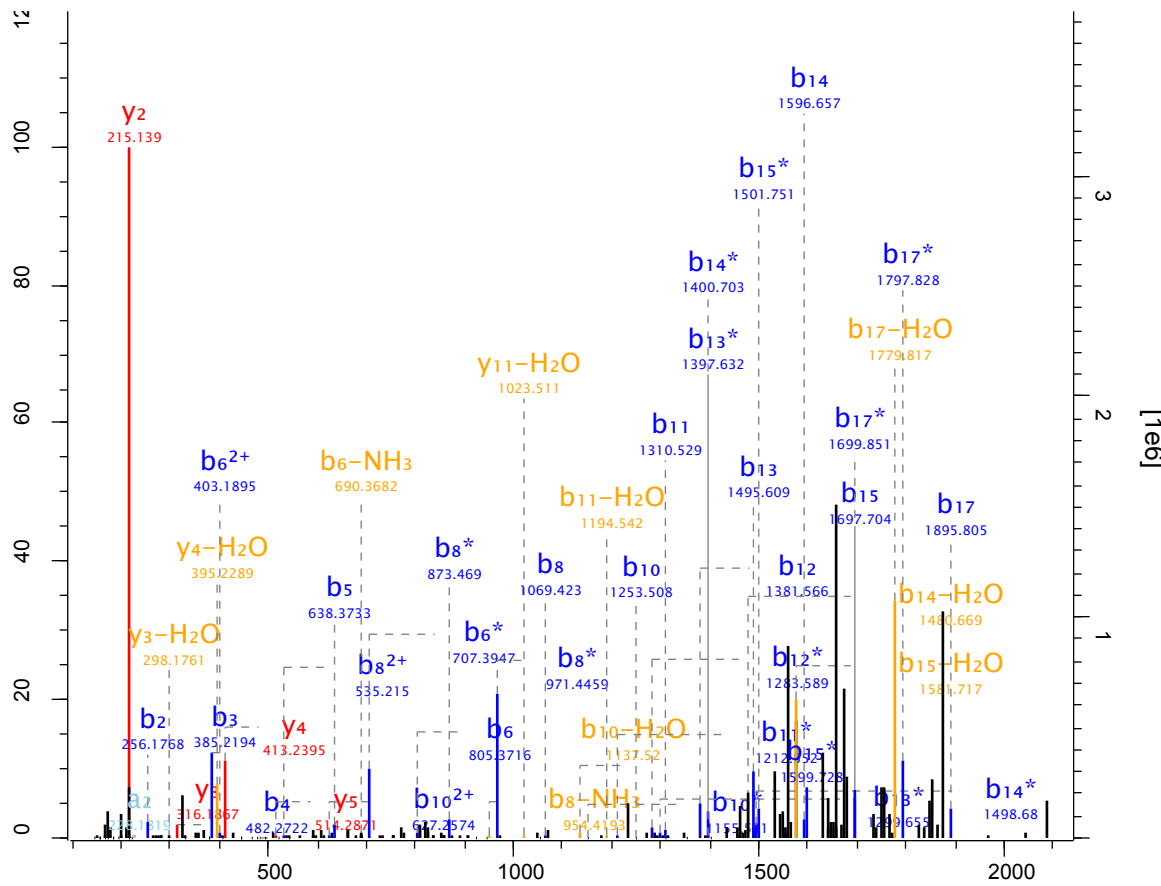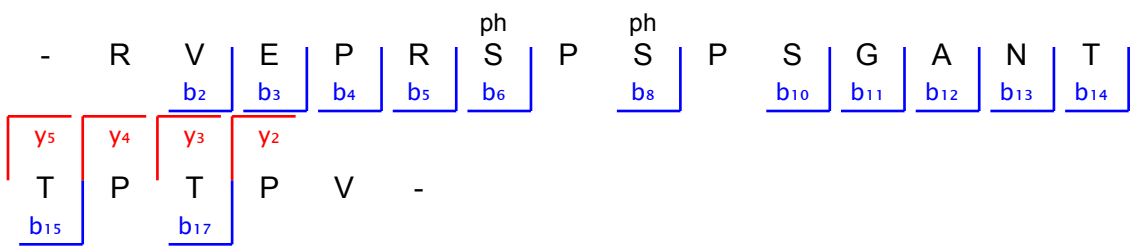

Raw file Scan Method Score m/z  
 Recip\_2\_34\_38 1081 FTMS; HCD 144.95 591.27

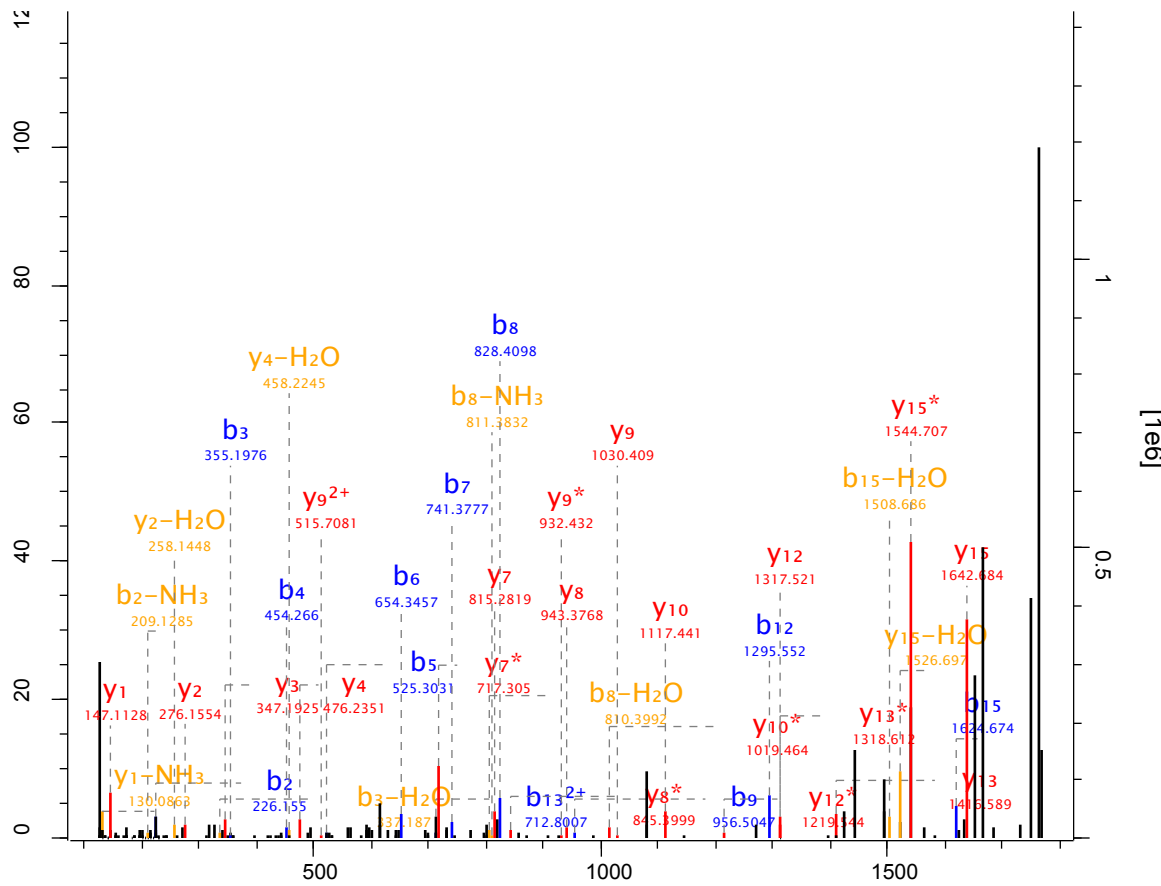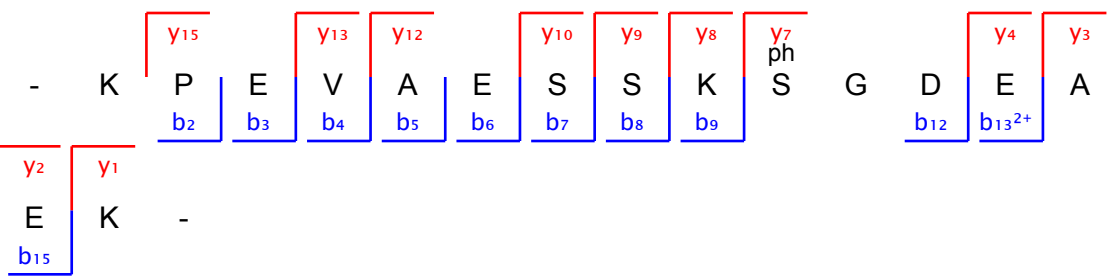

| Raw file      | Scan  | Method    | Score | m/z    |
|---------------|-------|-----------|-------|--------|
| Recip_2_34_38 | 10839 | FTMS; HCD | 58.51 | 522.77 |

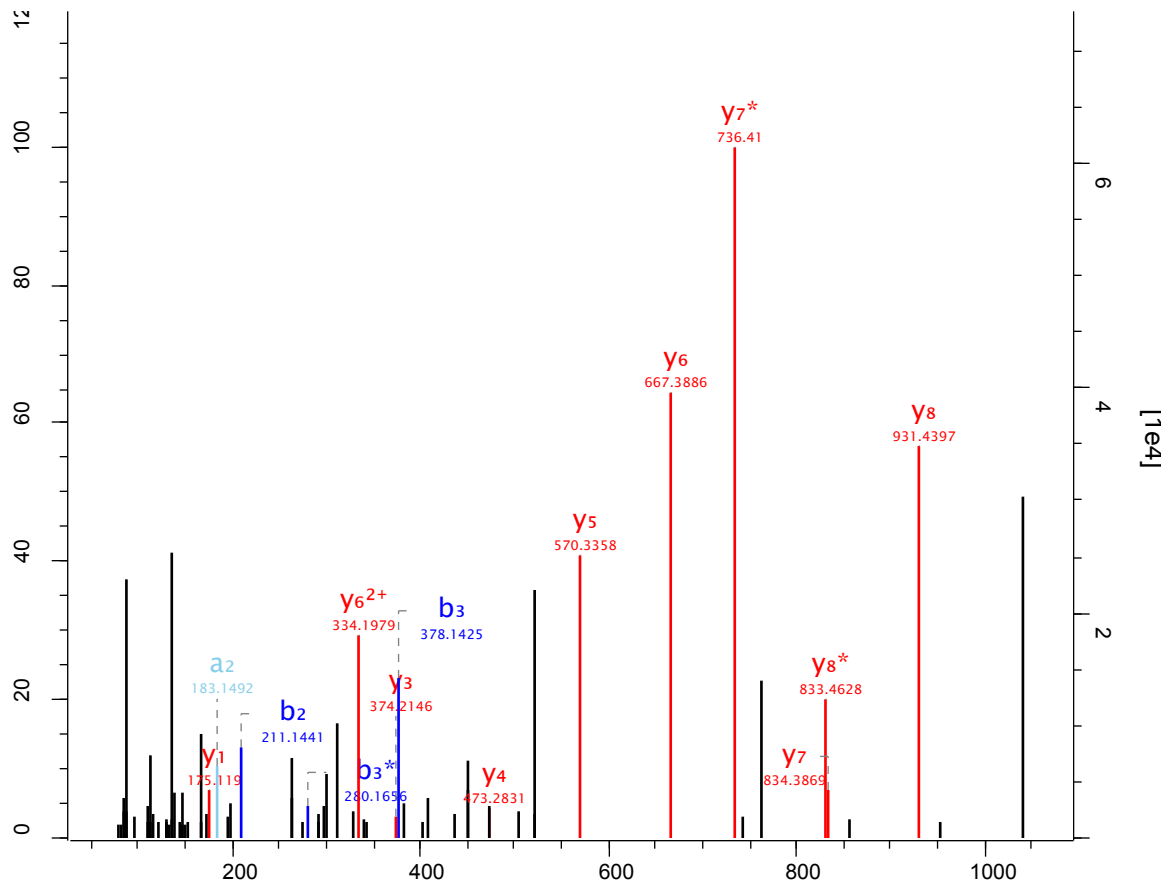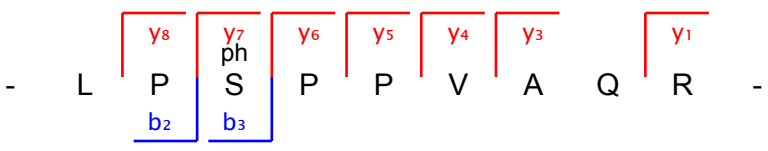

| Raw file      | Scan | Method    | Score | m/z    |
|---------------|------|-----------|-------|--------|
| Recip_2_34_38 | 1089 | FTMS; HCD | 92.26 | 548.24 |

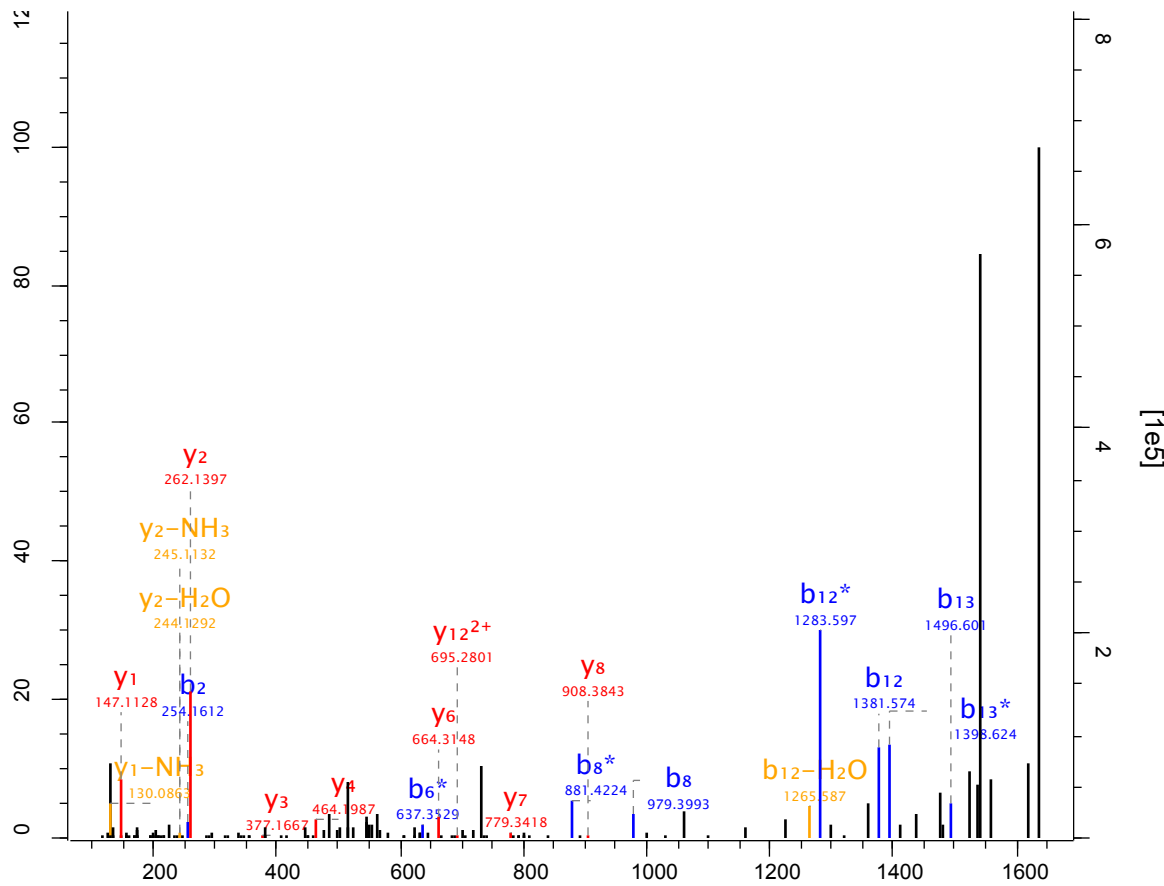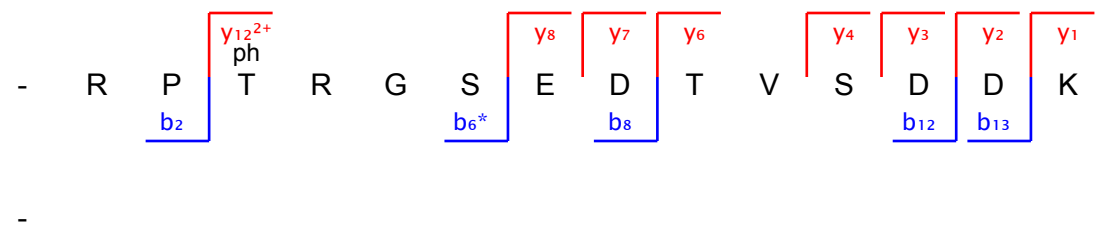

| Raw file      | Scan | Method    | Score | m/z    |
|---------------|------|-----------|-------|--------|
| Recip_2_34_38 | 1091 | FTMS; HCD | 85.01 | 457.21 |

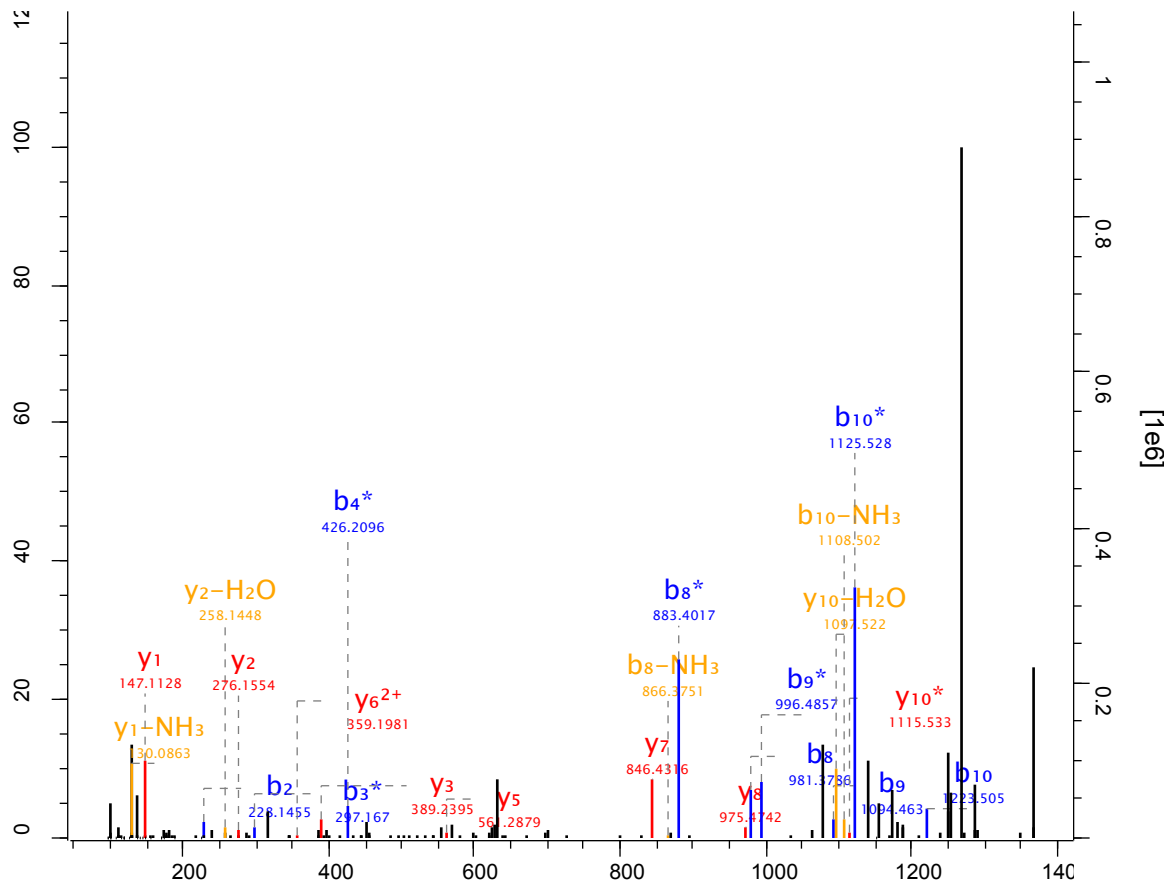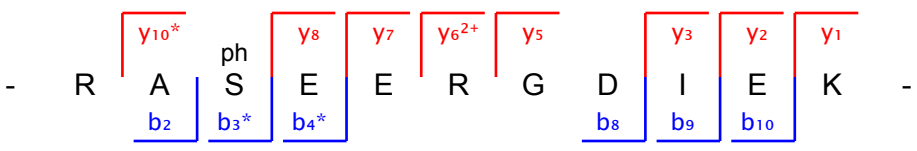

Raw file Scan Method Score m/z  
 Recip\_2\_34\_38 11203 FTMS; HCD 44.39 757.3

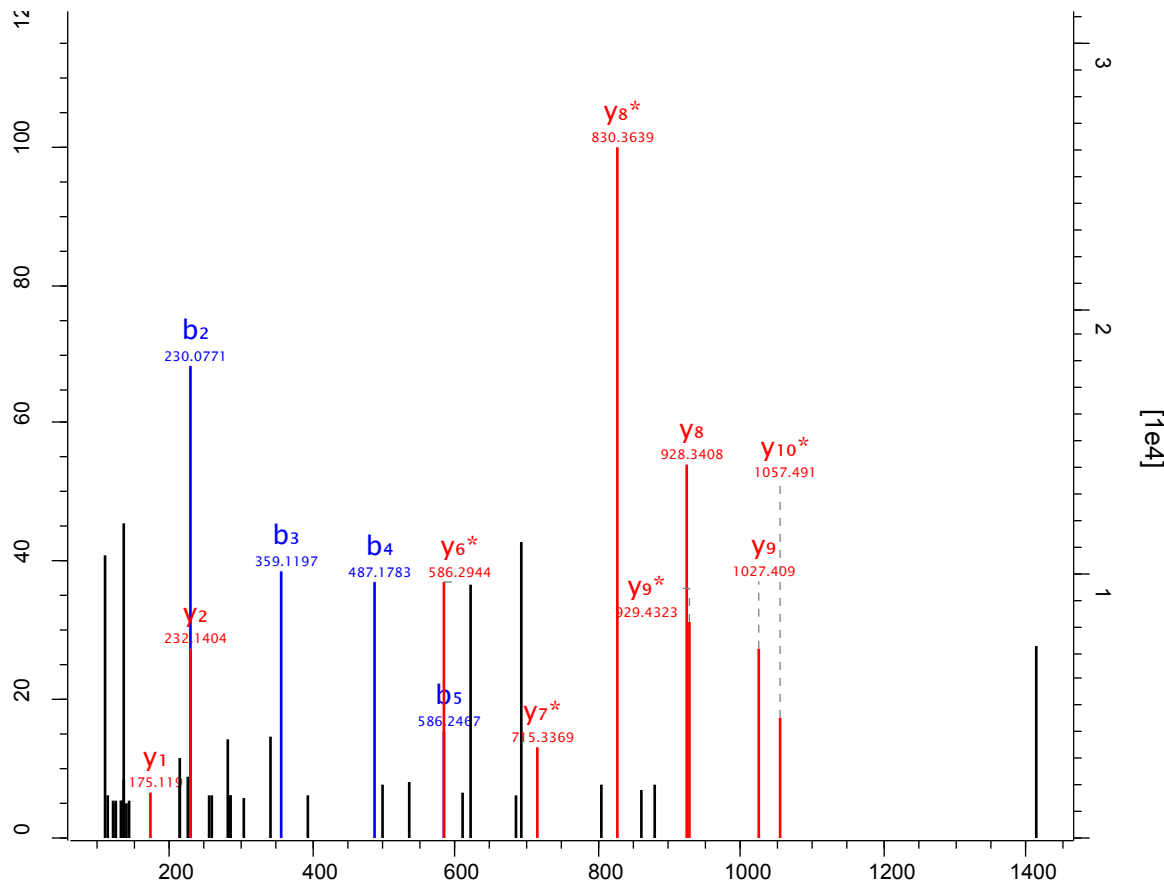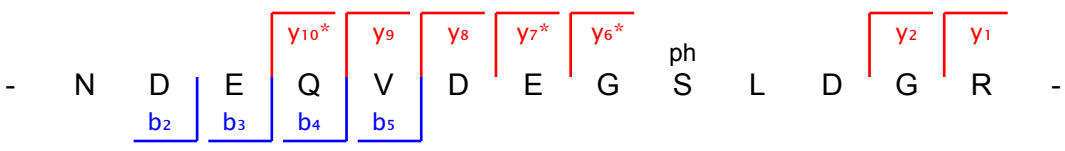

| Raw file      | Scan | Method    | Score | m/z    |
|---------------|------|-----------|-------|--------|
| Recip_2_34_38 | 1129 | FTMS; HCD | 42.06 | 462.53 |

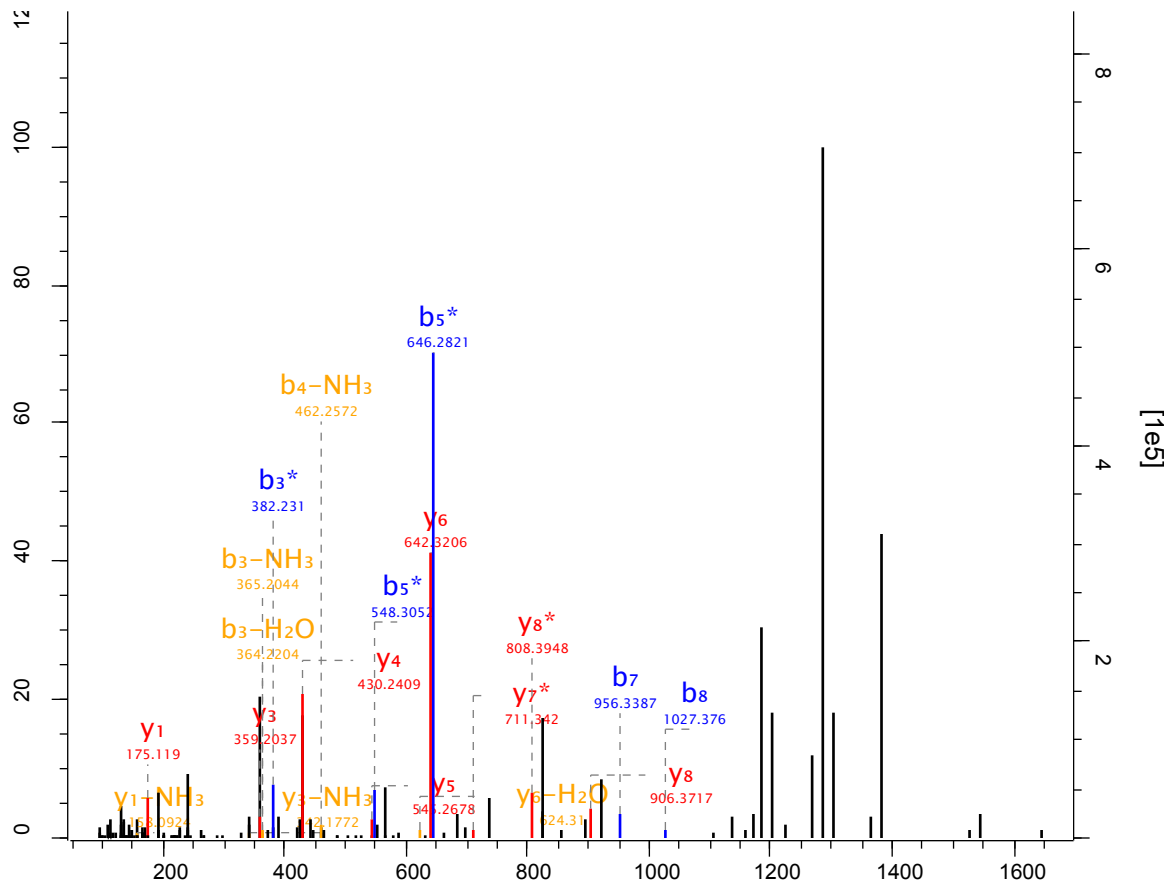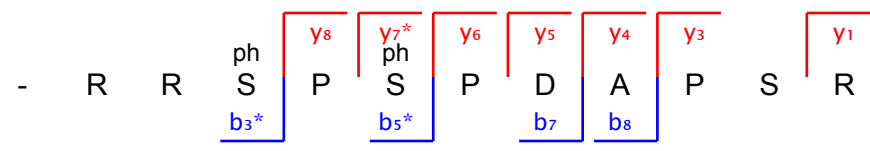



Raw file Scan Method Score m/z  
 Recip\_2\_34\_38 11304 FTMS; HCD 77.75 501.26

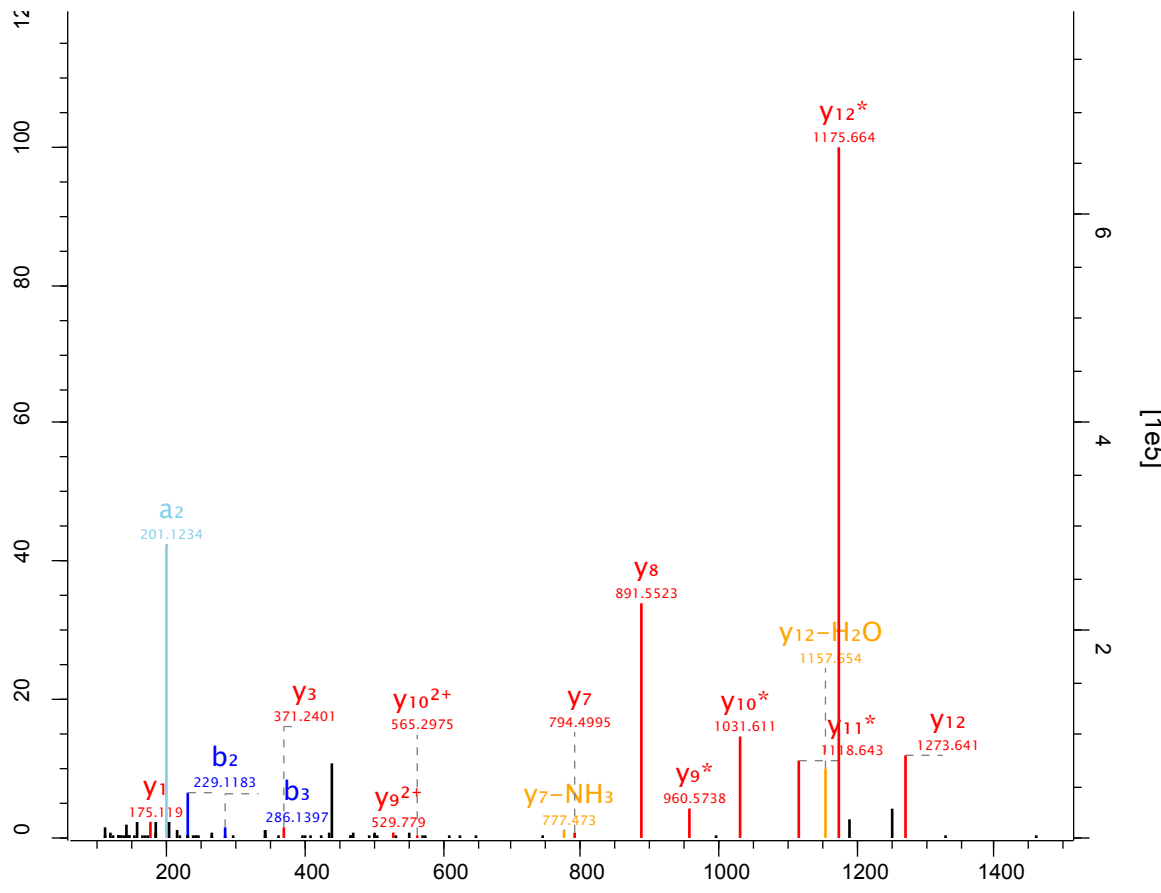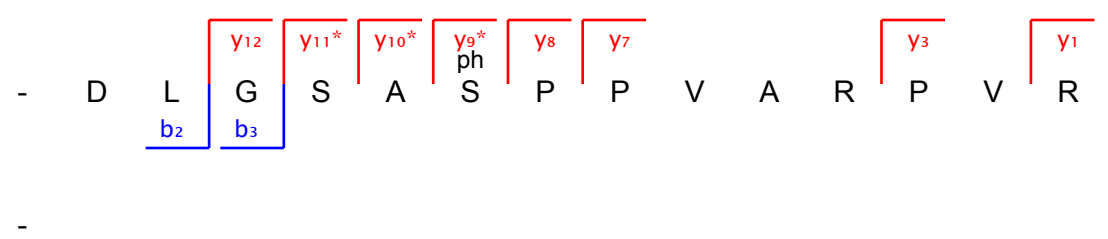

Raw file Scan Method Score m/z  
 Recip\_2\_34\_38 1132 FTMS; HCD 65.18 506.21

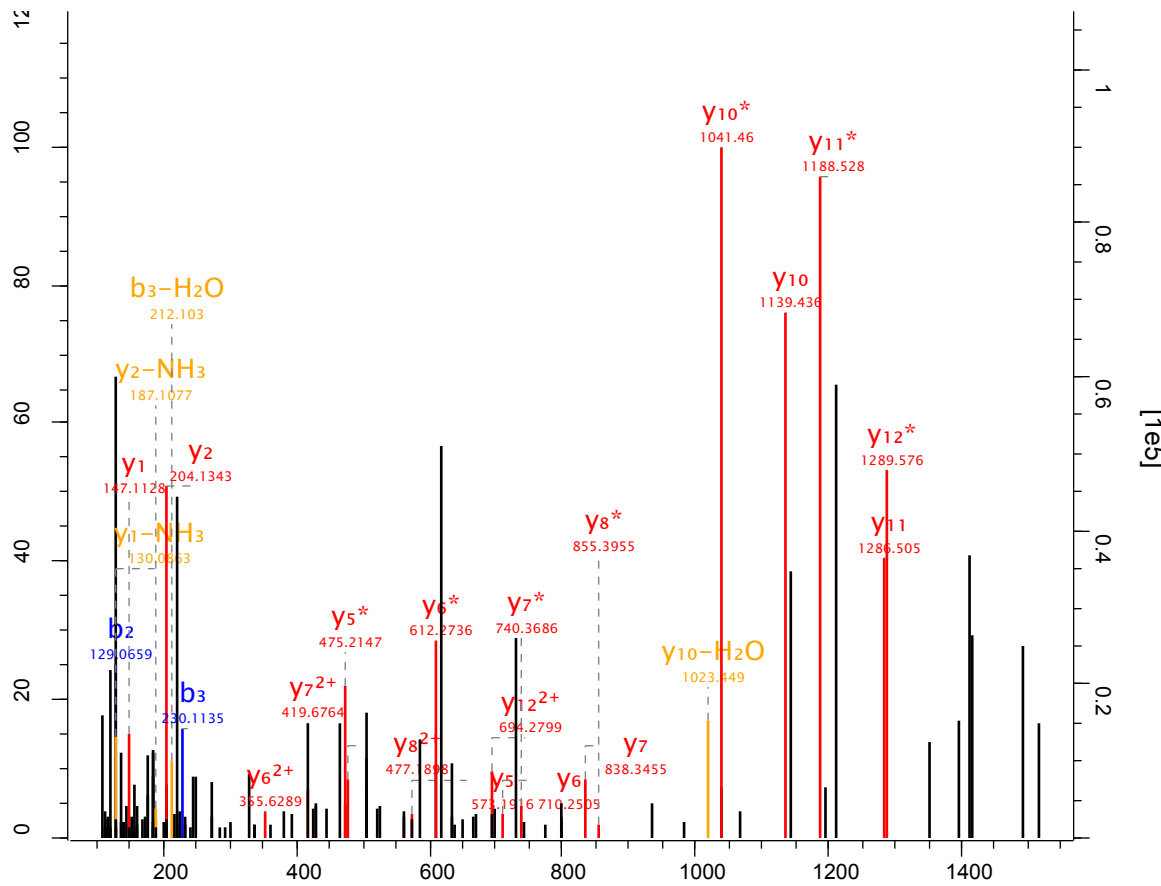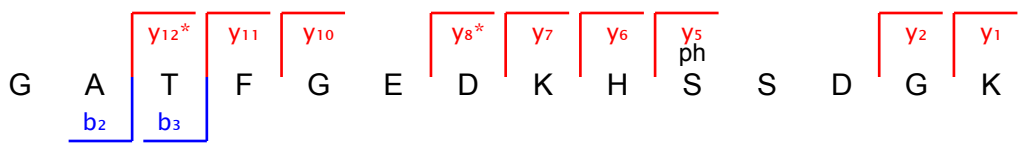

Raw file Scan Method Score m/z  
 Recip\_2\_34\_38 1133 FTMS; HCD 112.55 532.23

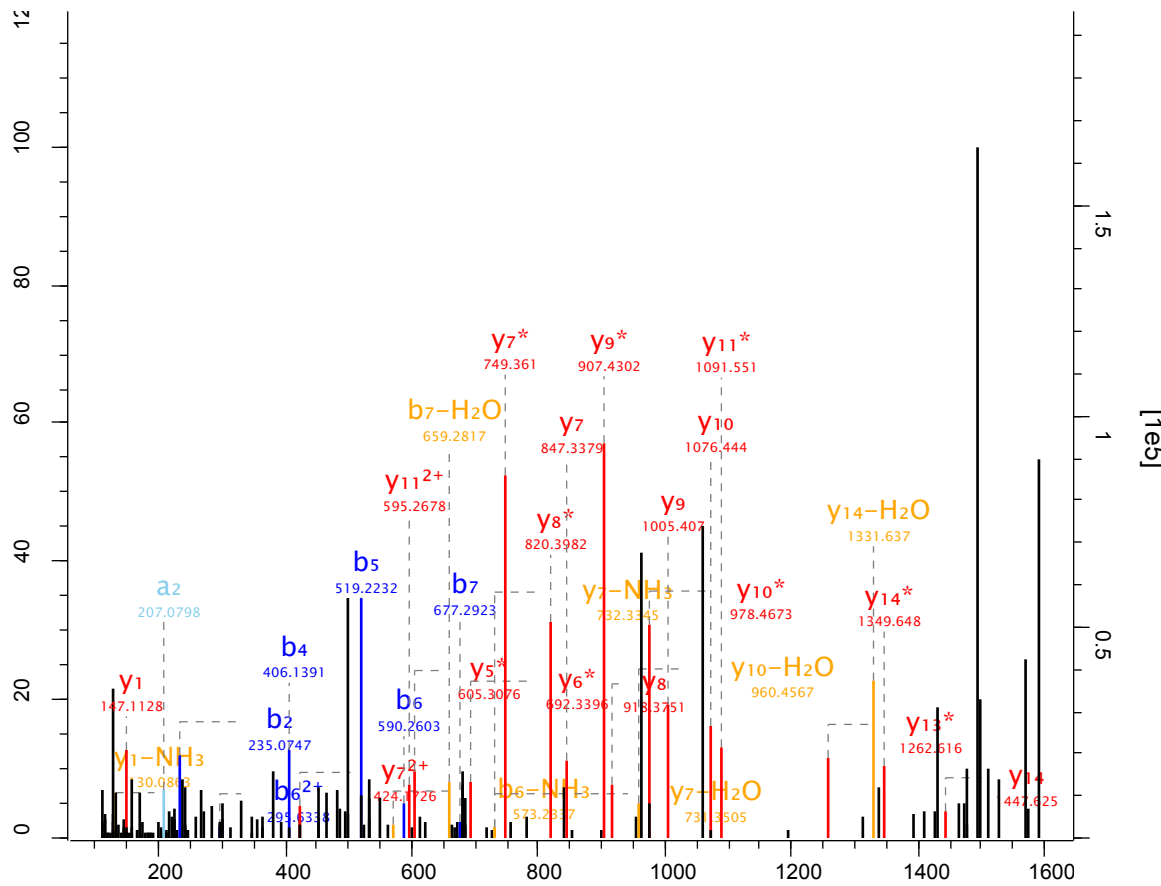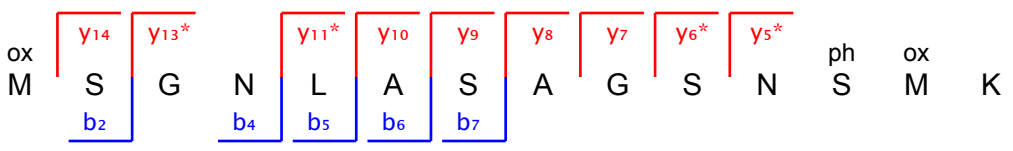

y1  
K

Raw file Scan Method Score m/z  
 Recip\_2\_34\_38 11383 FTMS; HCD 68.58 764.3

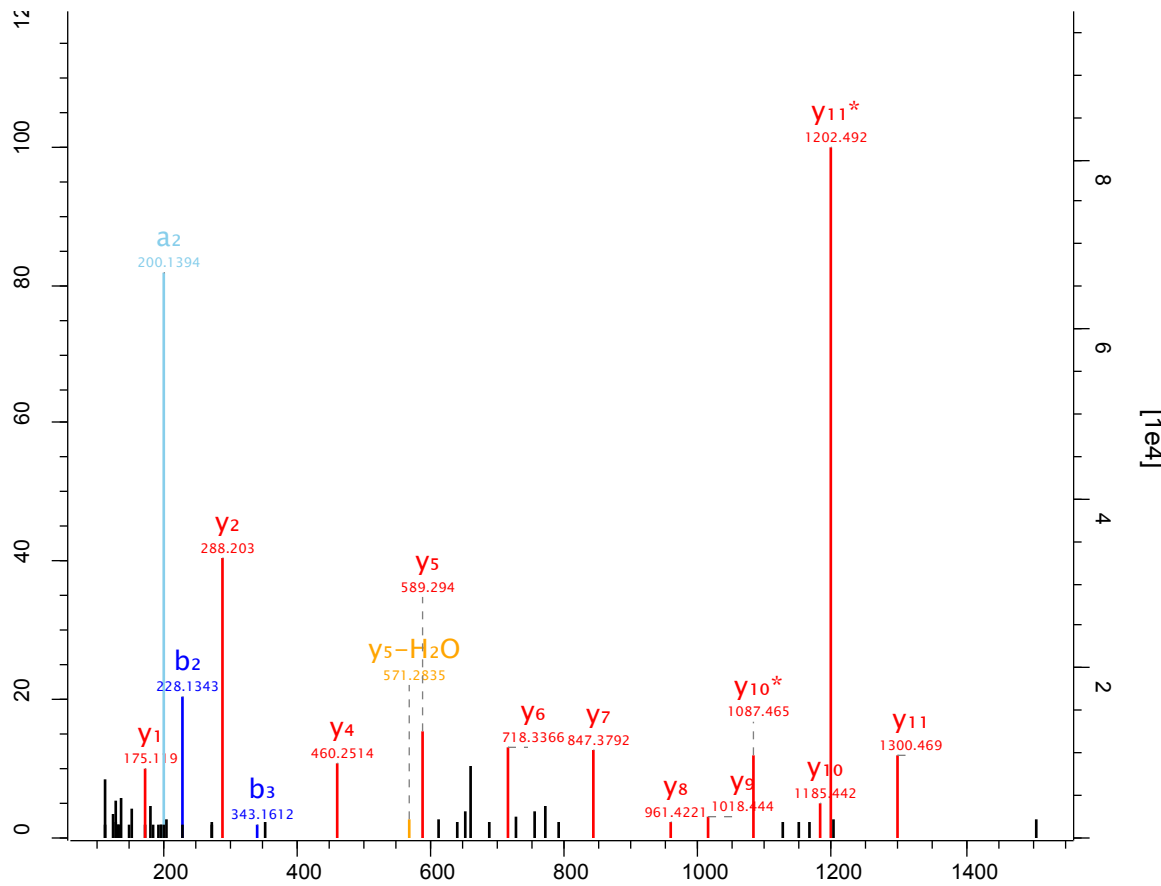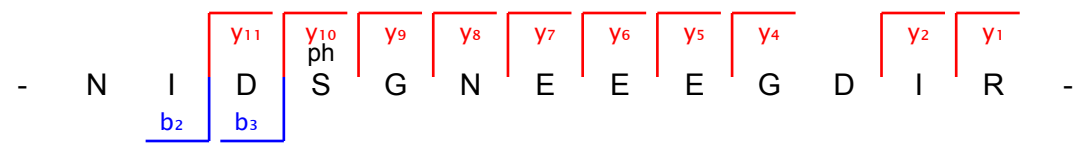

| Raw file      | Scan | Method    | Score | m/z    |
|---------------|------|-----------|-------|--------|
| Recip_2_34_38 | 1157 | FTMS; HCD | 44.79 | 672.27 |

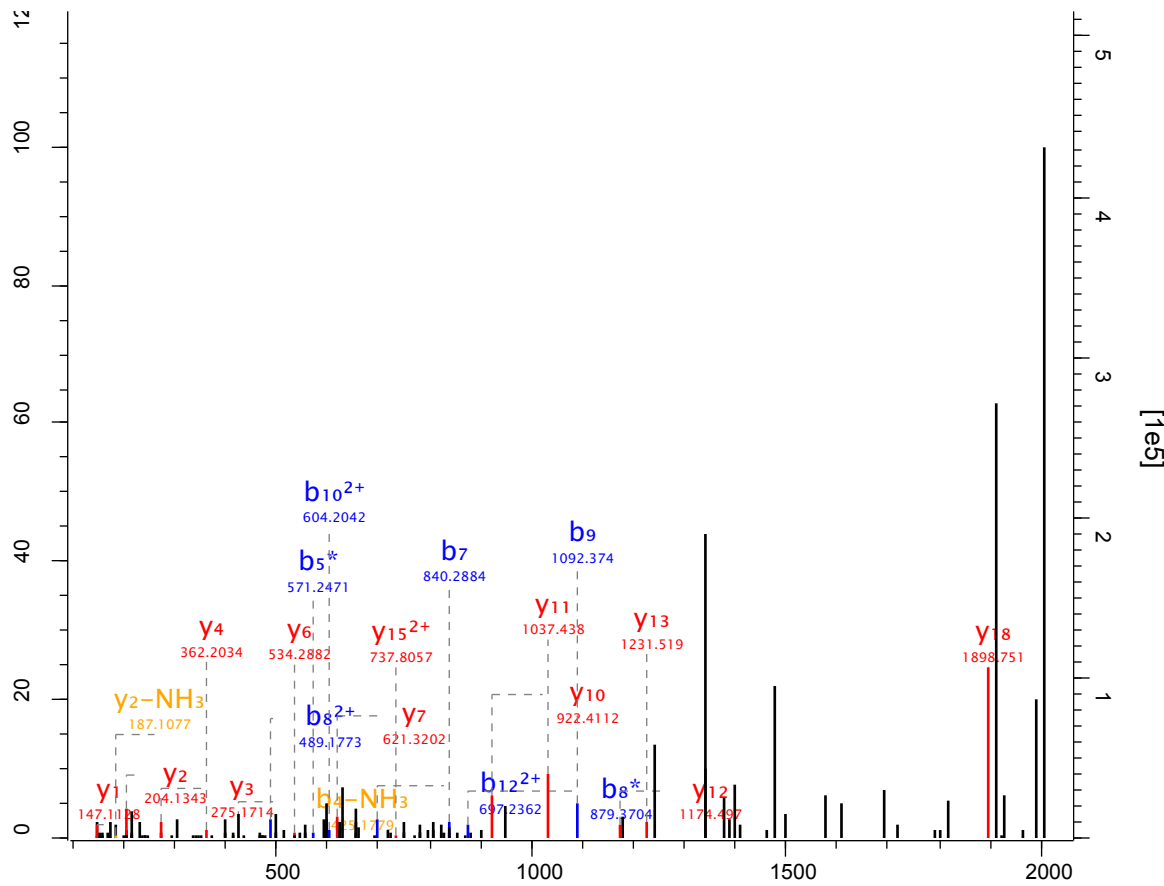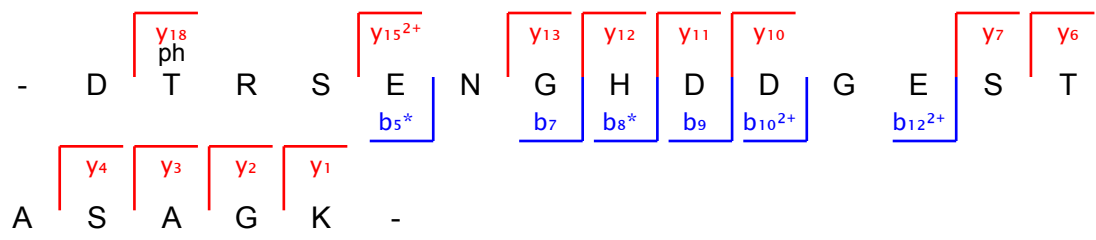

Raw file Scan Method Score m/z  
 Recip\_2\_34\_38 11621 FTMS; HCD 74.3 670.33

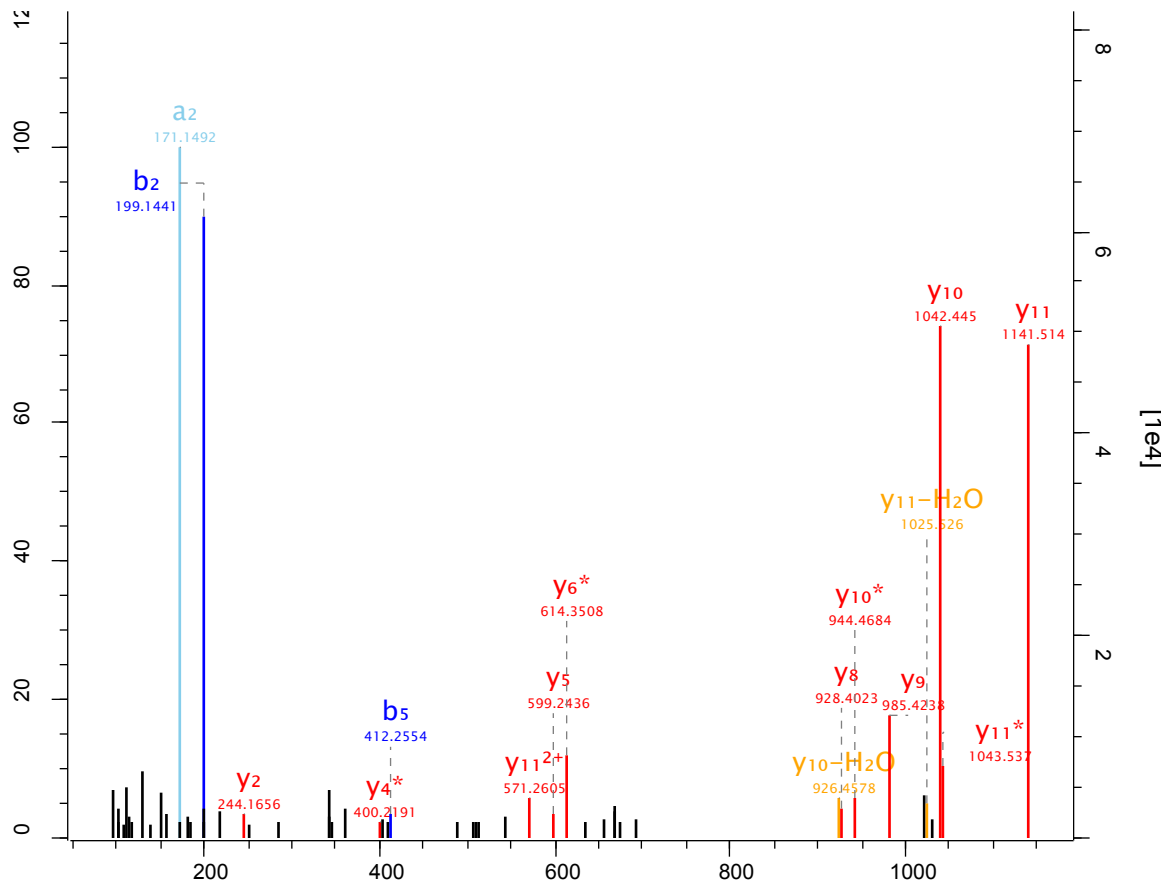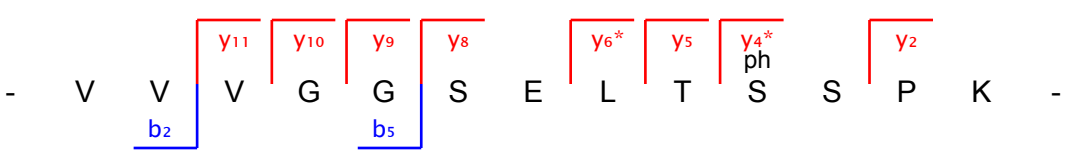

Raw file Scan Method Score m/z  
 Recip\_2\_34\_38 11749 FTMS; HCD 77.06 571.72

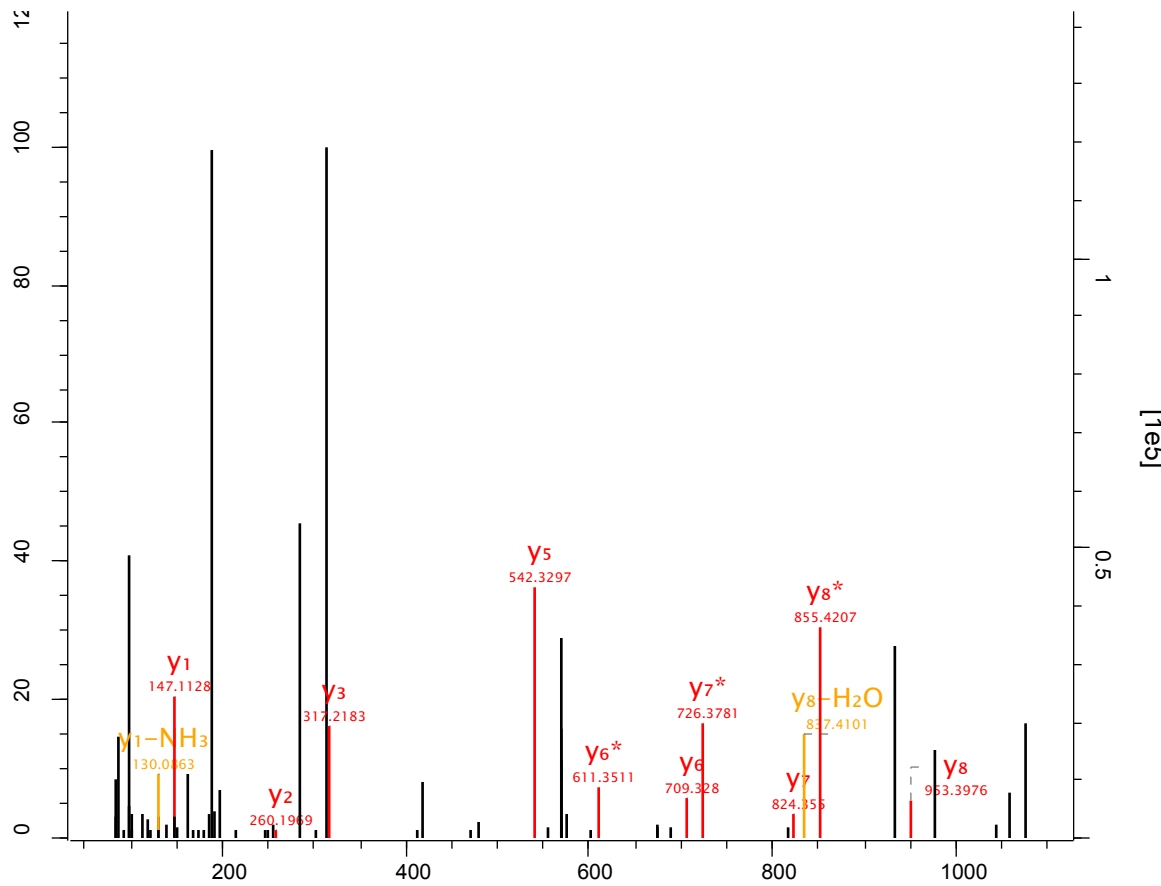

ac ox y8 y7 y6 y5  
 - M E D S P Q G L K -

| Raw file      | Scan  | Method    | Score | m/z   |
|---------------|-------|-----------|-------|-------|
| Recip_2_34_38 | 11822 | FTMS; HCD | 53.57 | 496.7 |

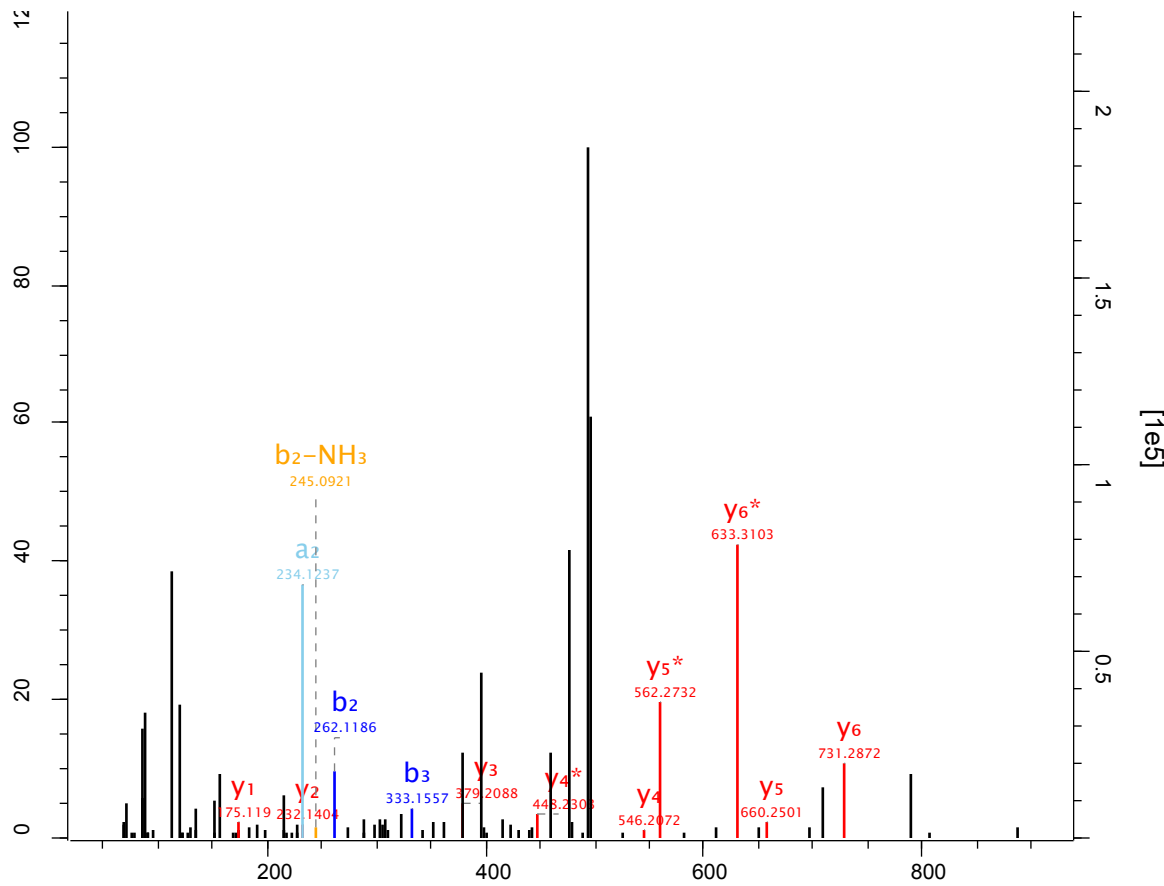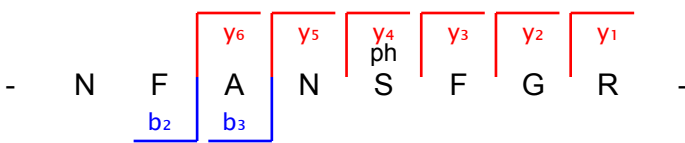



Raw file Scan Method Score m/z  
 Recip\_2\_34\_38 1188 FTMS; HCD 53.56 476.55

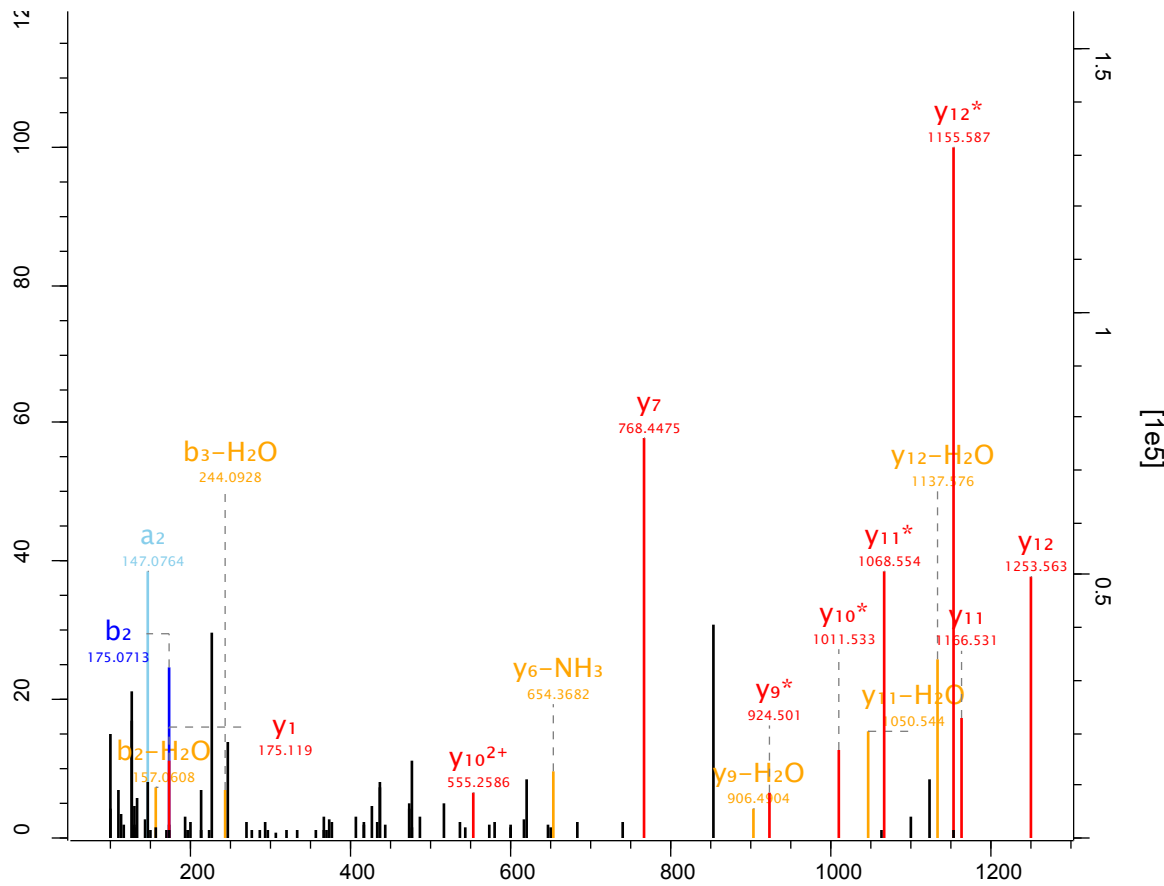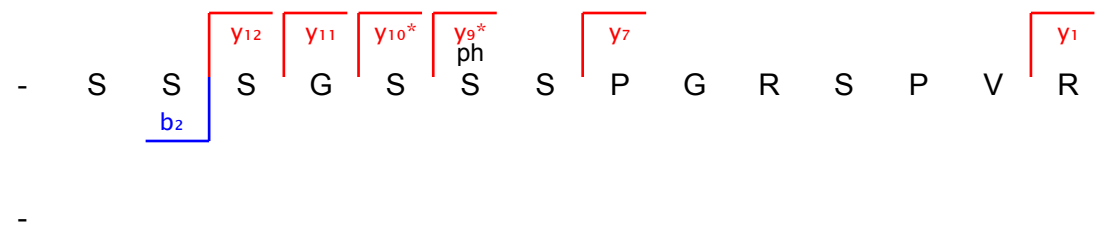

| Raw file      | Scan | Method    | Score | m/z    |
|---------------|------|-----------|-------|--------|
| Recip_2_34_38 | 1205 | FTMS; HCD | 66.02 | 526.27 |

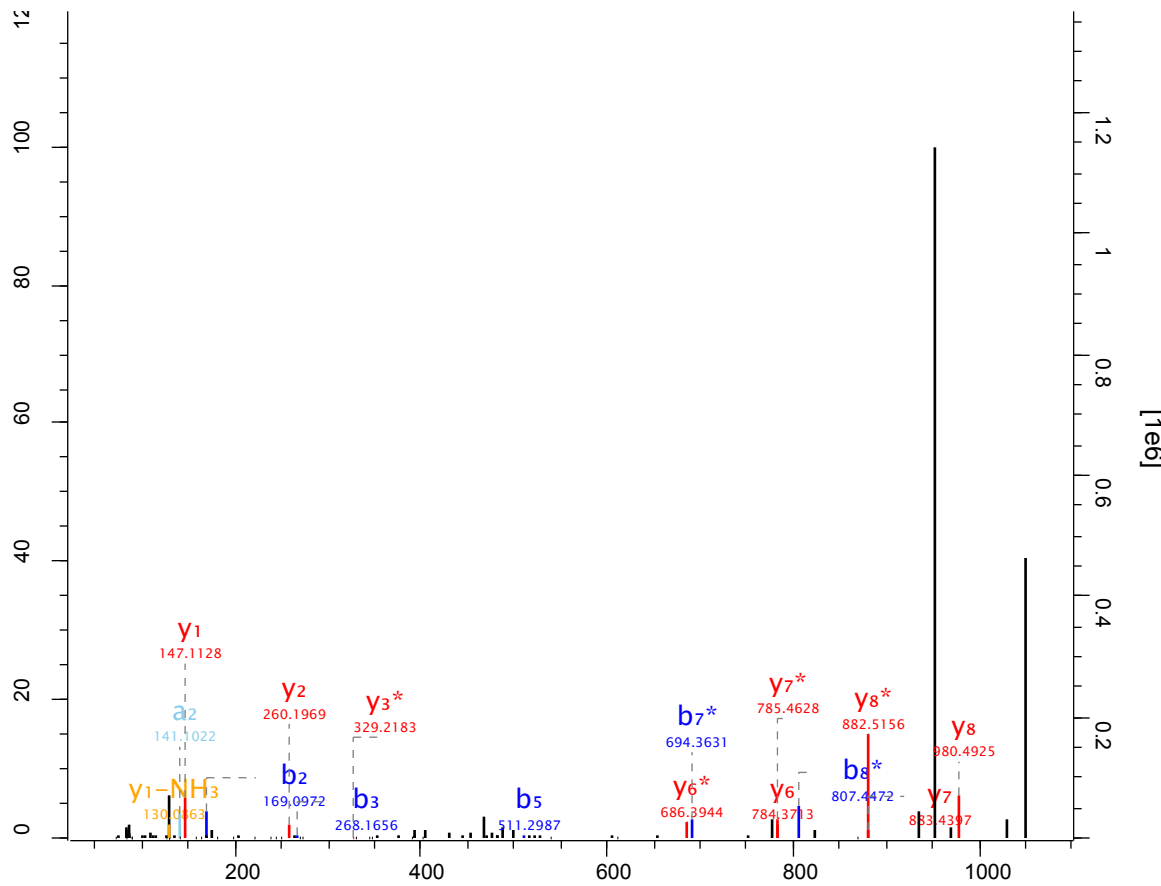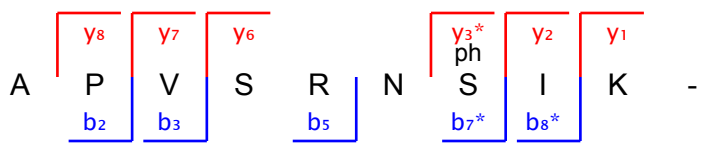

Raw file Scan Method Score m/z  
 Recip\_2\_34\_38 1208 FTMS; HCD 66.99 474.86

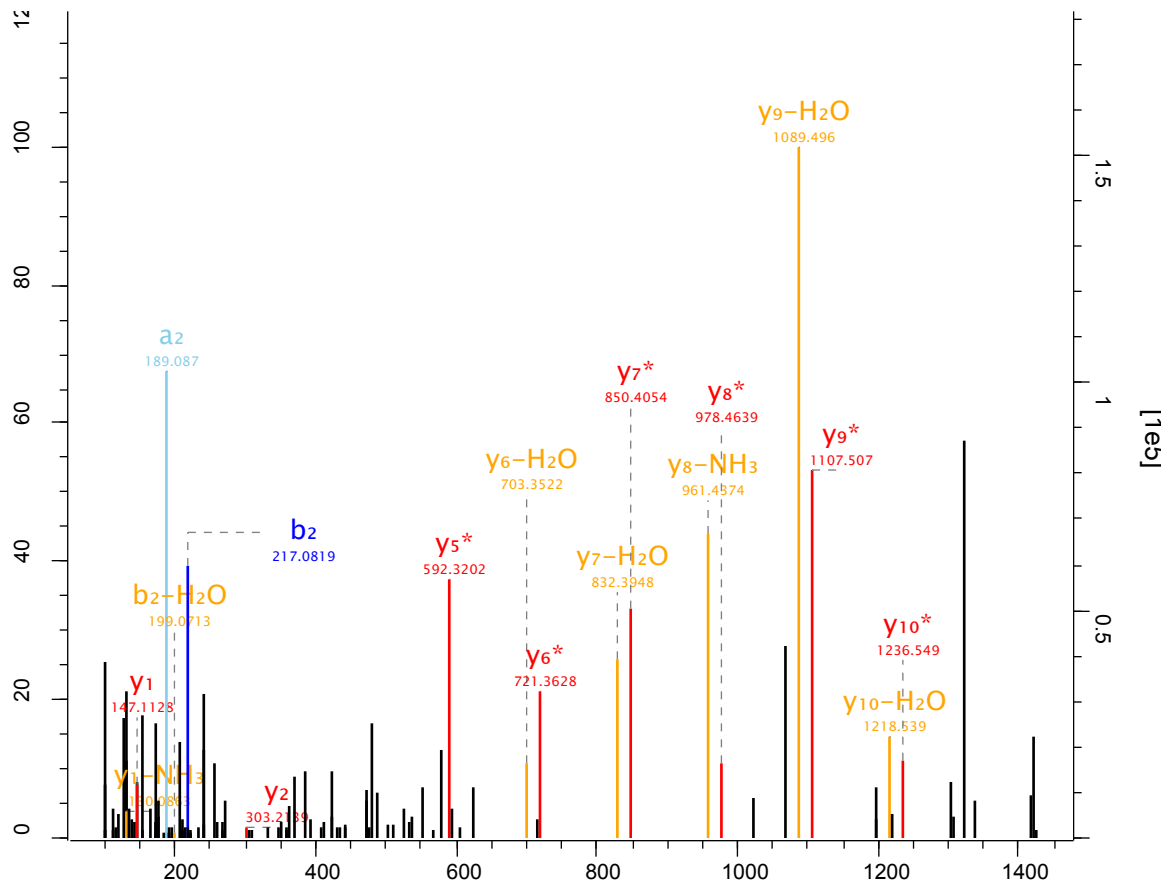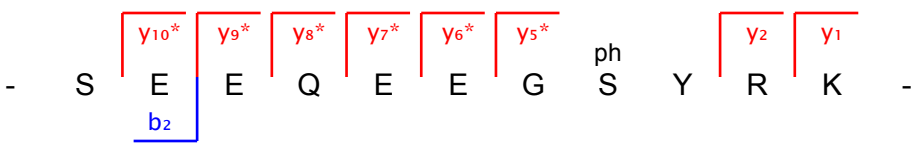

| Raw file      | Scan | Method    | Score | m/z    |
|---------------|------|-----------|-------|--------|
| Recip_2_34_38 | 1217 | FTMS; HCD | 82.61 | 606.56 |

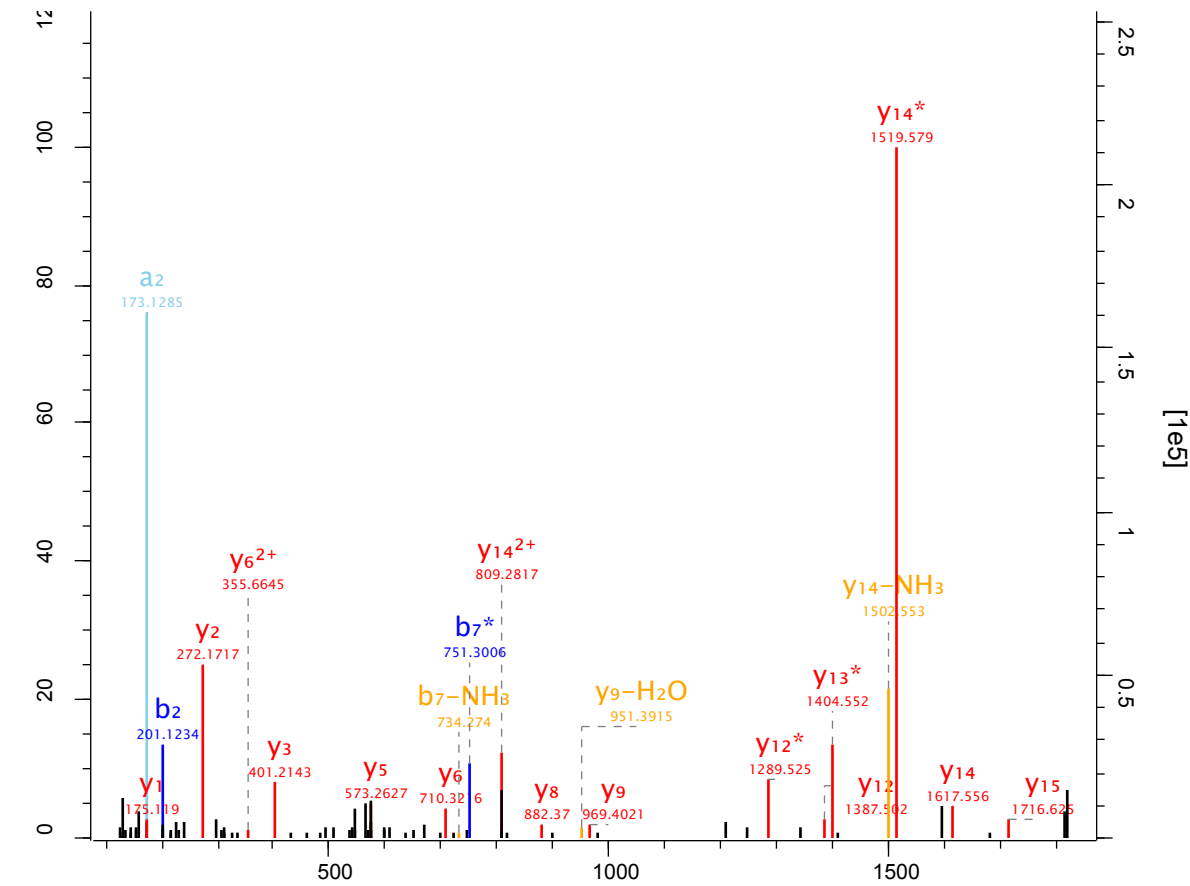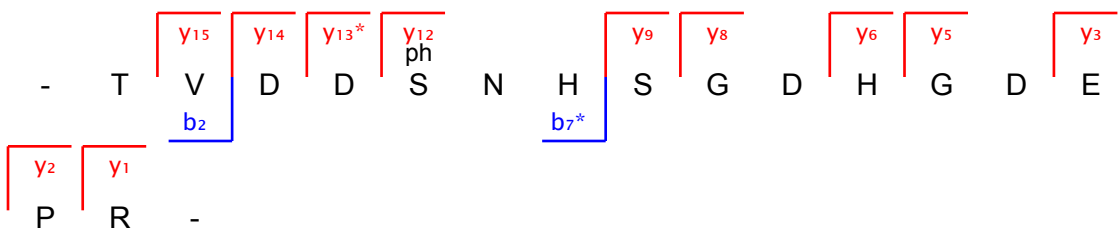

| Raw file      | Scan | Method    | Score | m/z    |
|---------------|------|-----------|-------|--------|
| Recip_2_34_38 | 1232 | FTMS; HCD | 50.04 | 423.53 |

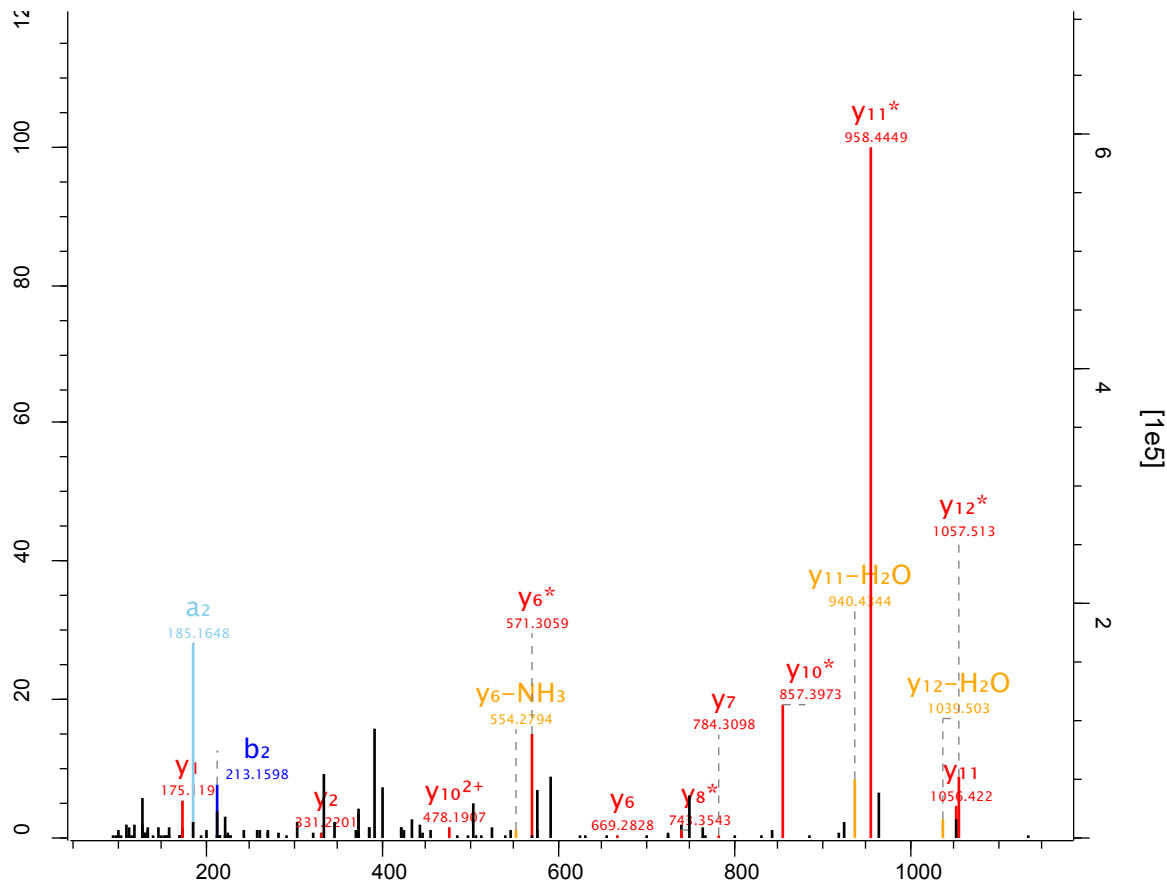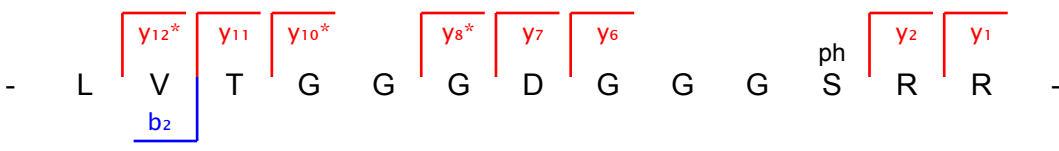

| Raw file      | Scan | Method    | Score | m/z    |
|---------------|------|-----------|-------|--------|
| Recip_2_34_38 | 1237 | FTMS; HCD | 55.26 | 634.79 |

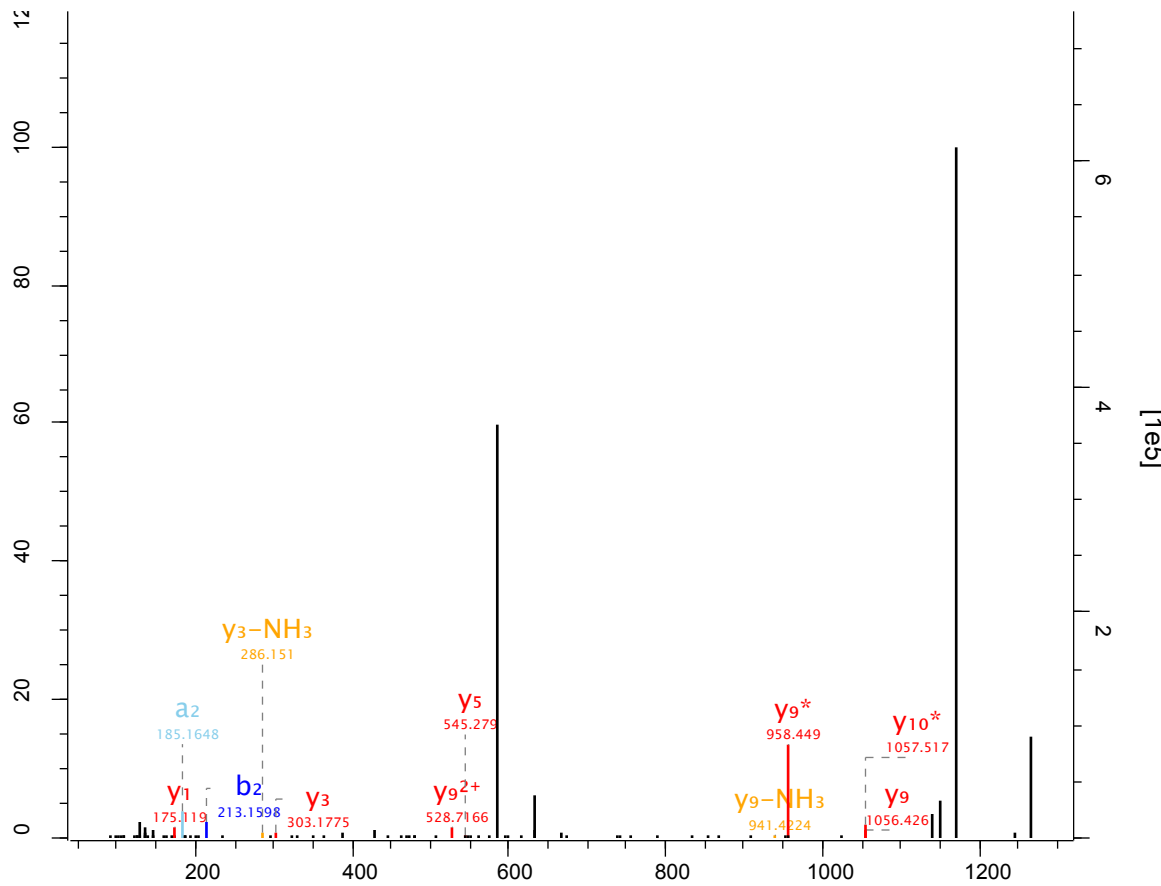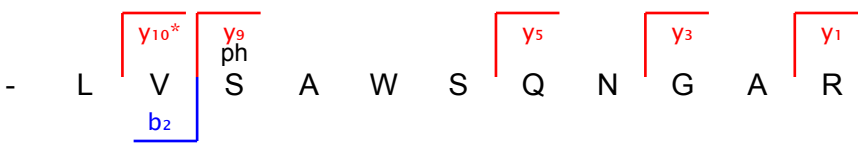

Raw file Scan Method Score m/z  
 Recip\_2\_34\_38 12660 FTMS; HCD 69.98 858.83

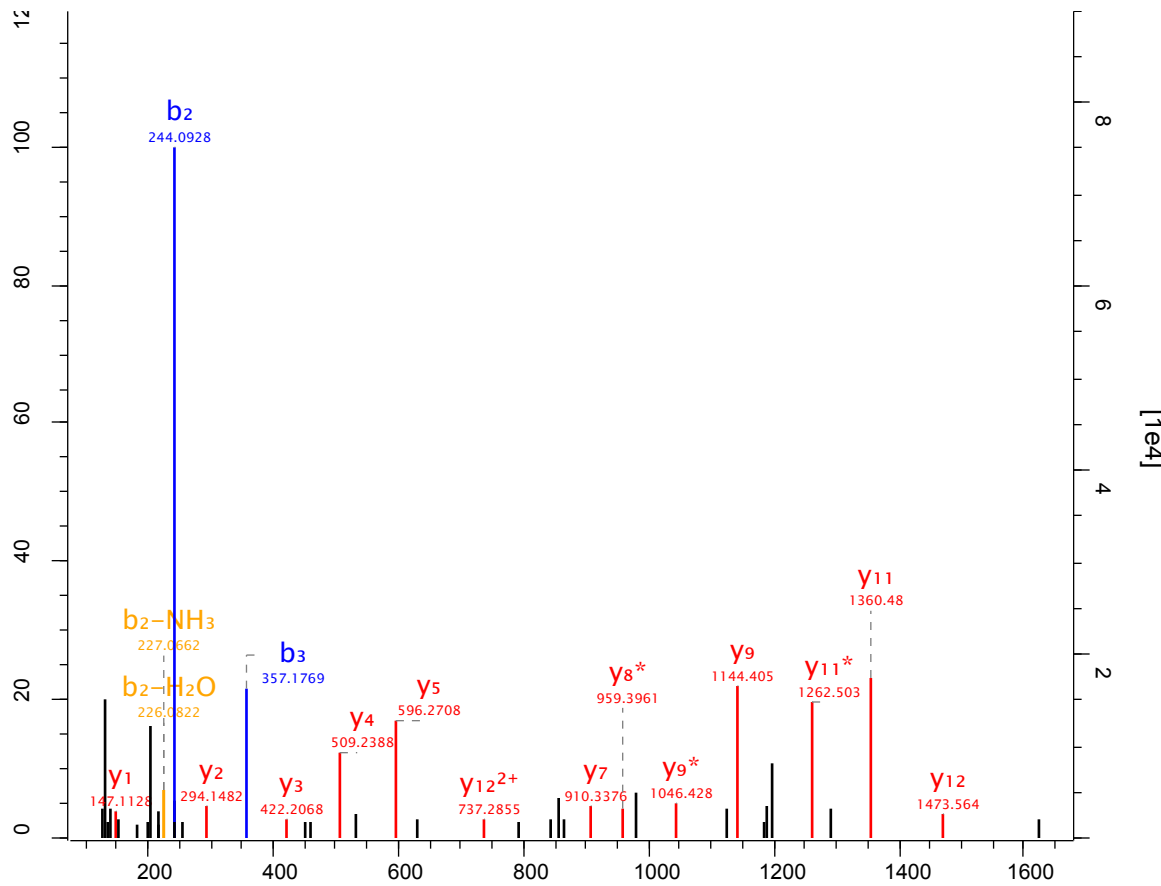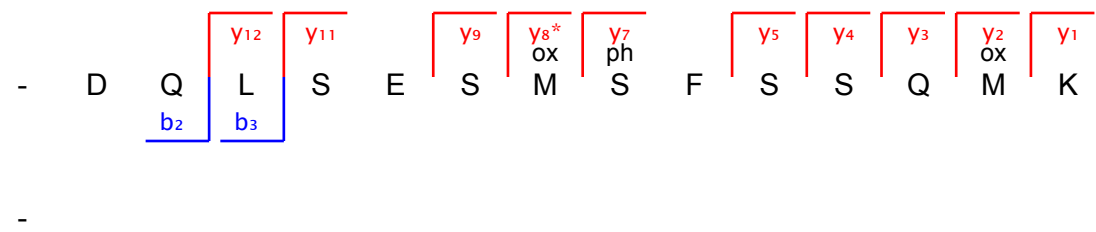

Raw file Scan Method Score m/z  
 Recip\_2\_34\_38 12783 FTMS; HCD 78.4 673.26

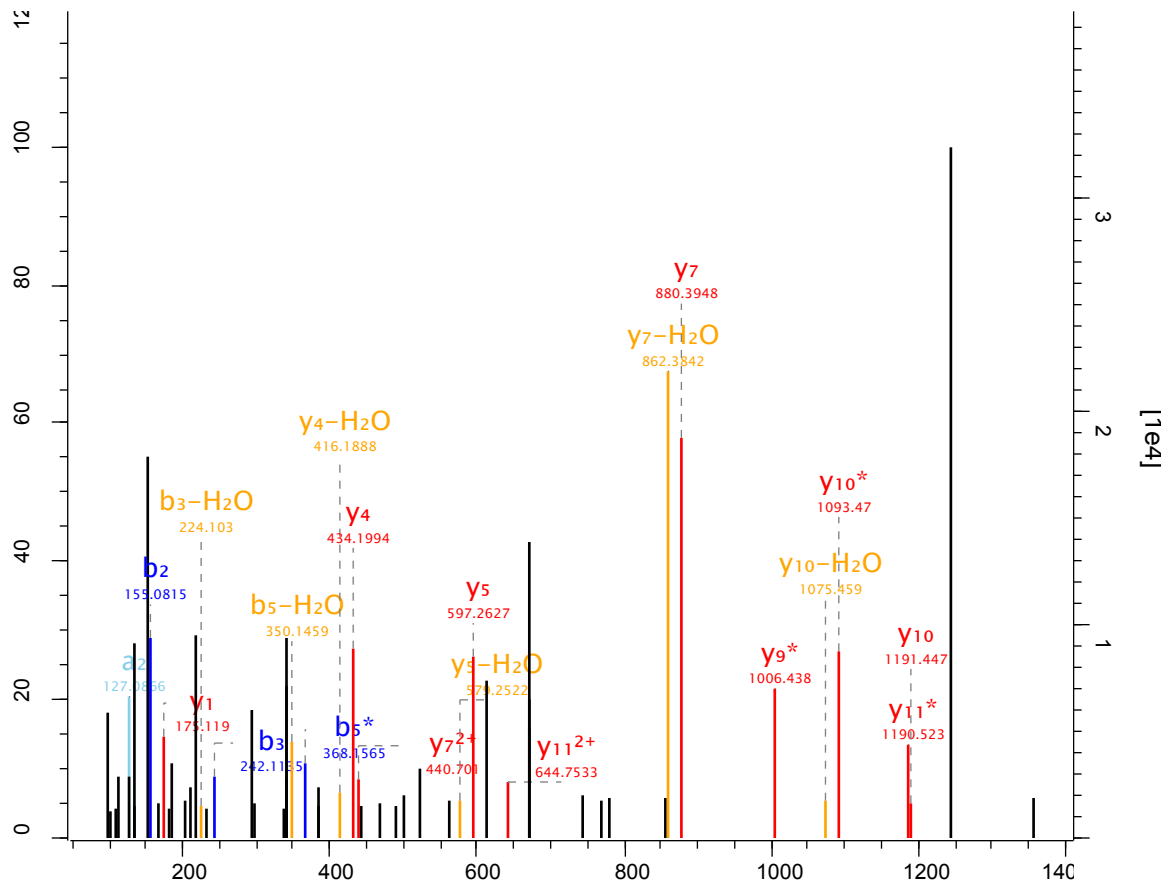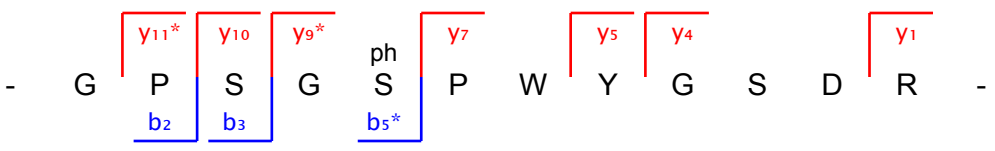



Raw file Scan Method Score m/z  
 Recip\_2\_34\_38 1316 FTMS; HCD 123.95 609.27

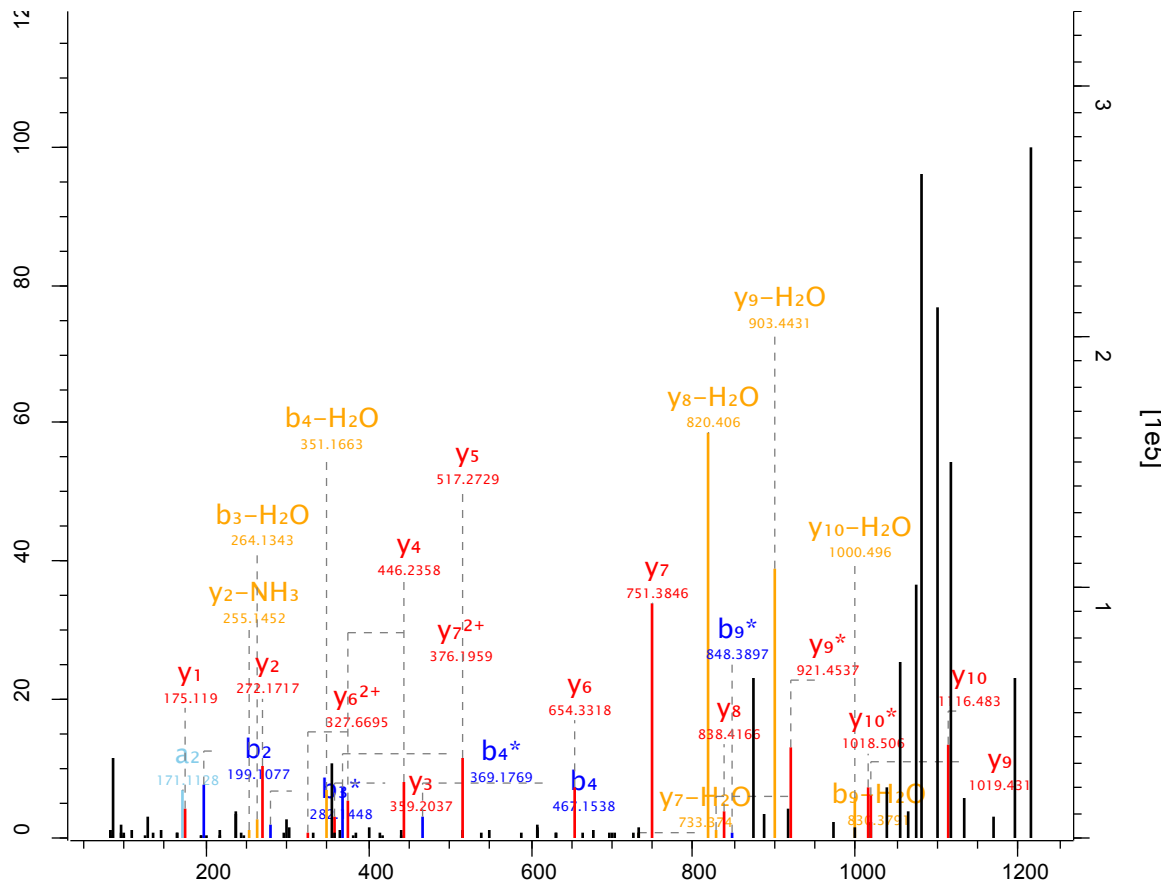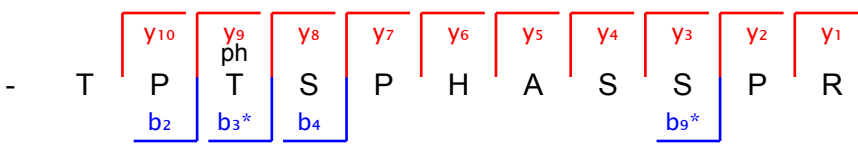

Raw file Scan Method Score m/z  
 Recip\_2\_34\_38 13171 FTMS; HCD 60.49 735.8

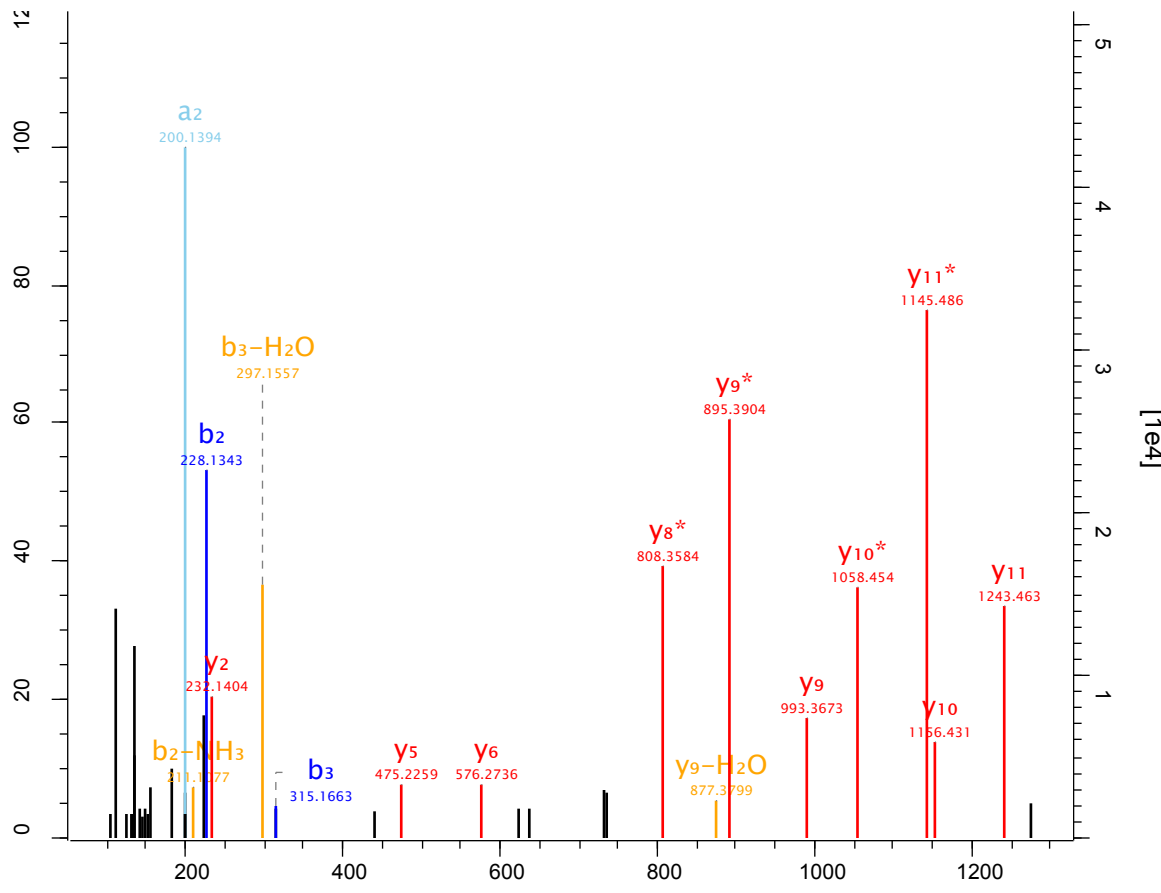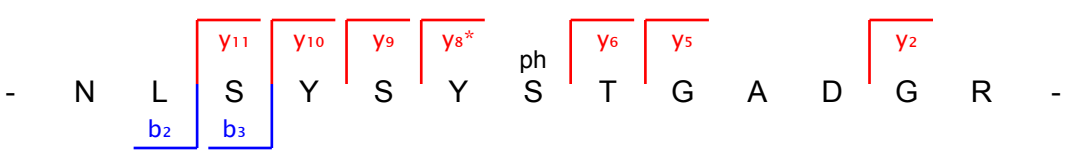

Raw file Scan Method Score m/z  
 Recip\_2\_34\_38 1320 FTMS; HCD 163.45 578.76

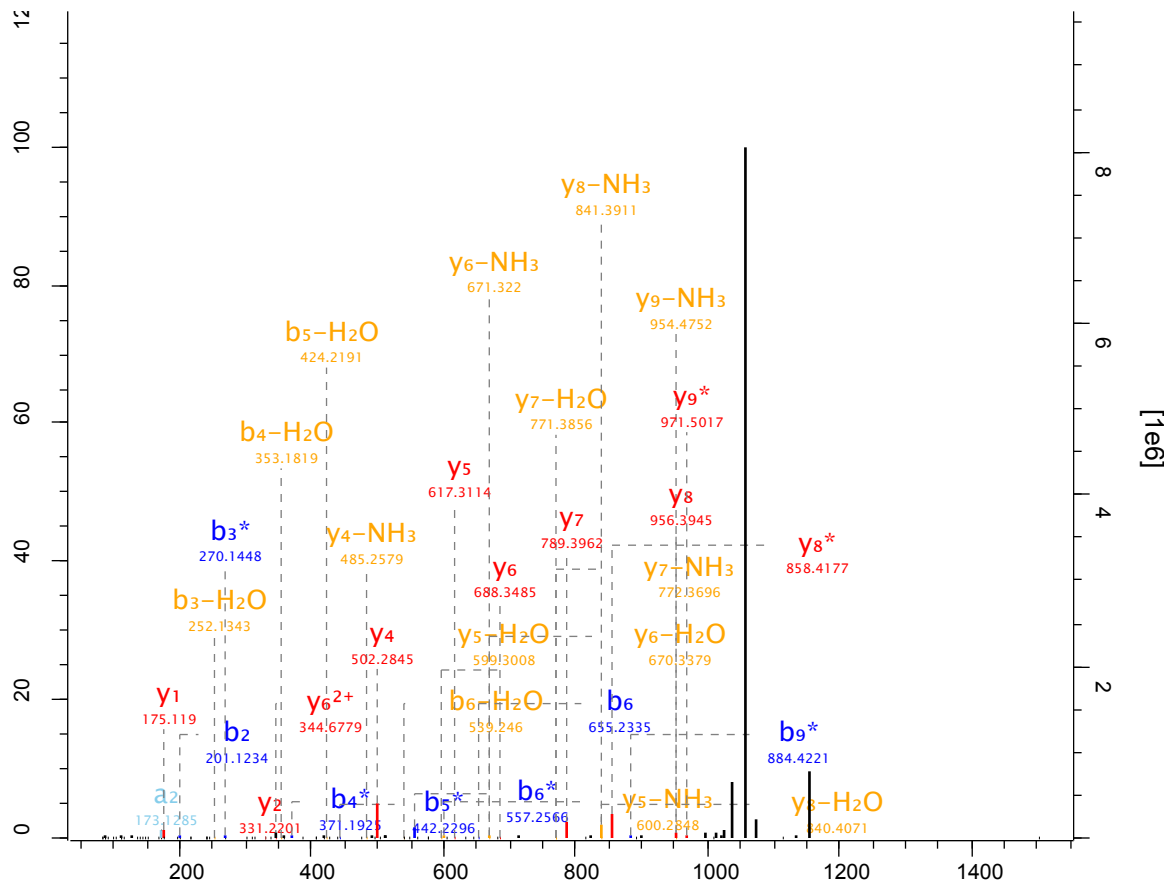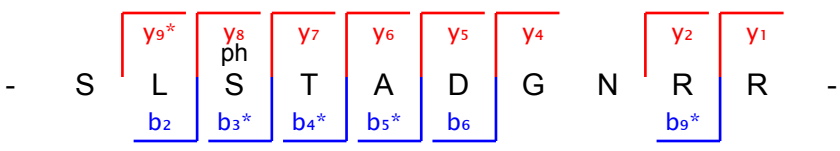

Raw file Scan Method Score m/z  
 Recip\_2\_34\_38 13295 FTMS; HCD 120.23 594.62

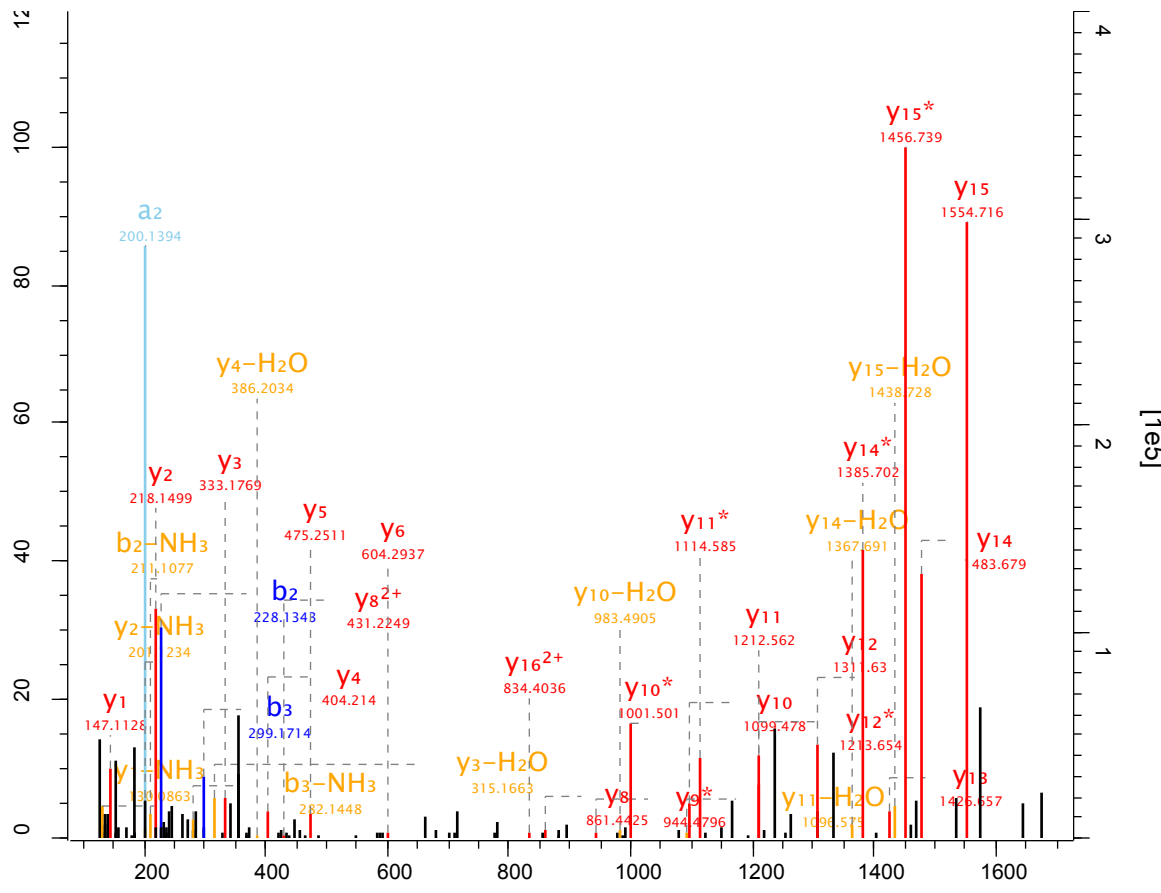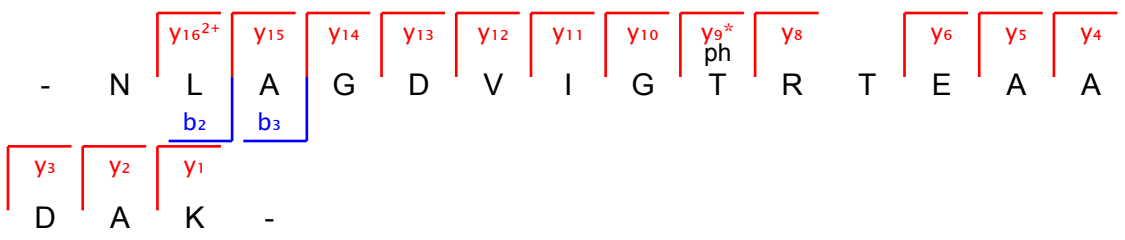

Raw file Scan Method Score m/z  
 Recip\_2\_34\_38 1330 FTMS; HCD 110.6 533.24

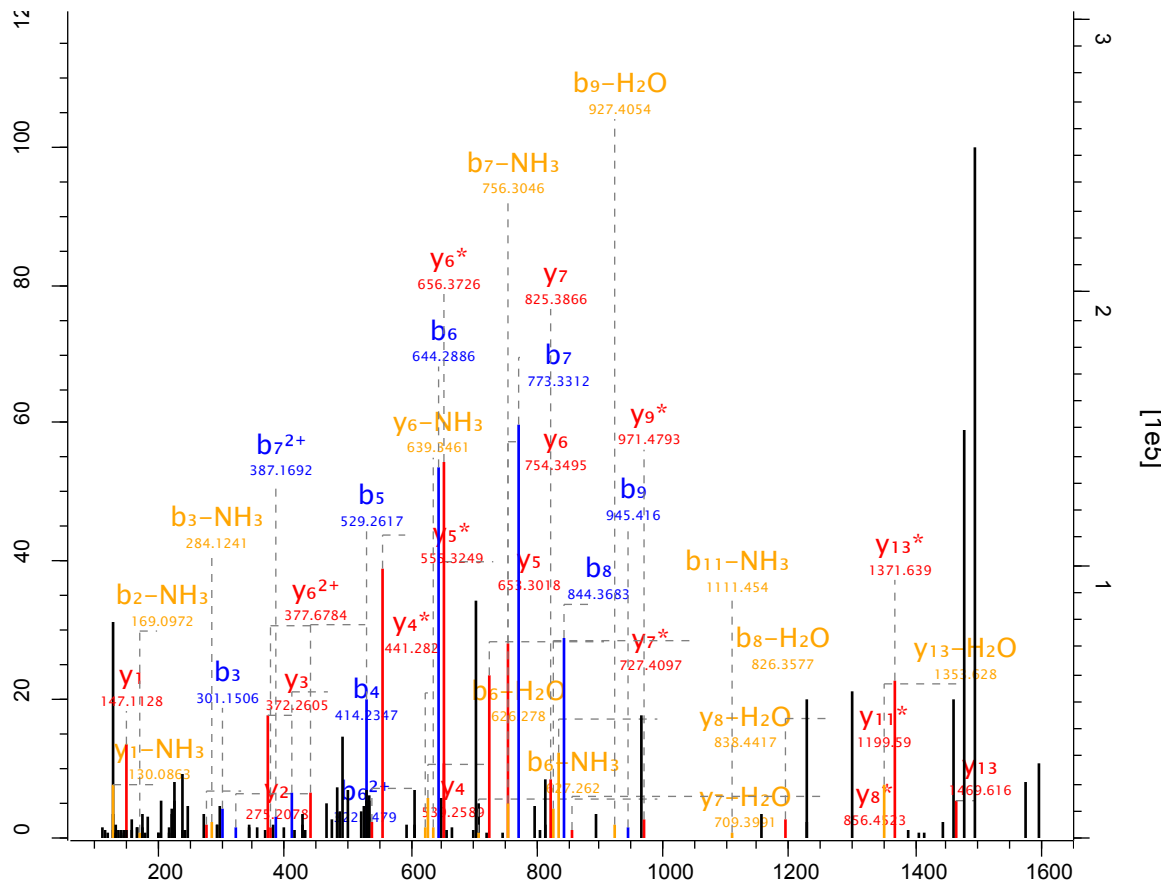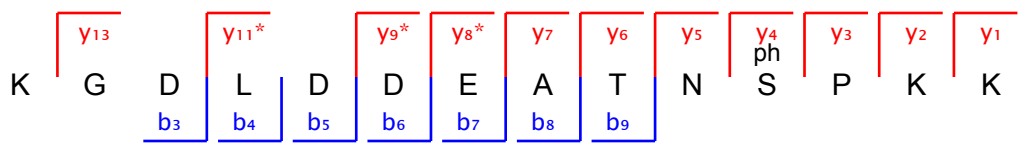

| Raw file      | Scan | Method    | Score | m/z    |
|---------------|------|-----------|-------|--------|
| Recip_2_34_38 | 1331 | FTMS; HCD | 59.73 | 536.22 |

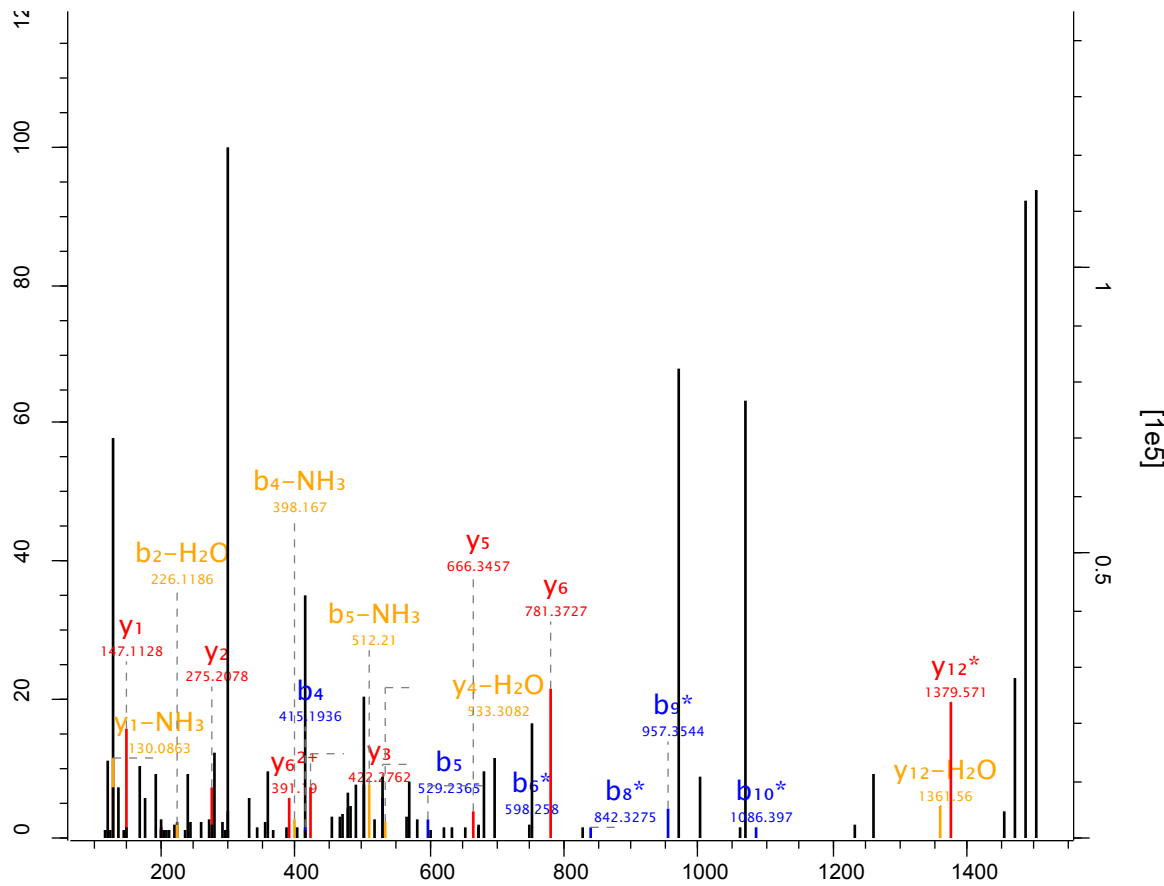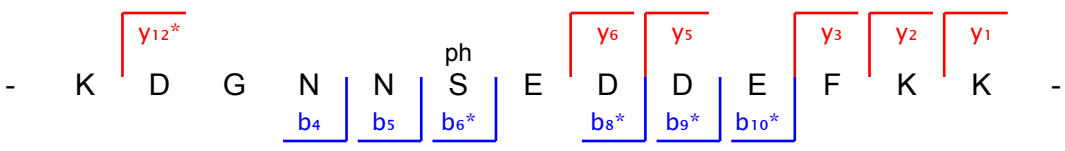

| Raw file      | Scan | Method    | Score | m/z    |
|---------------|------|-----------|-------|--------|
| Recip_2_34_38 | 1340 | FTMS; HCD | 51.03 | 564.59 |

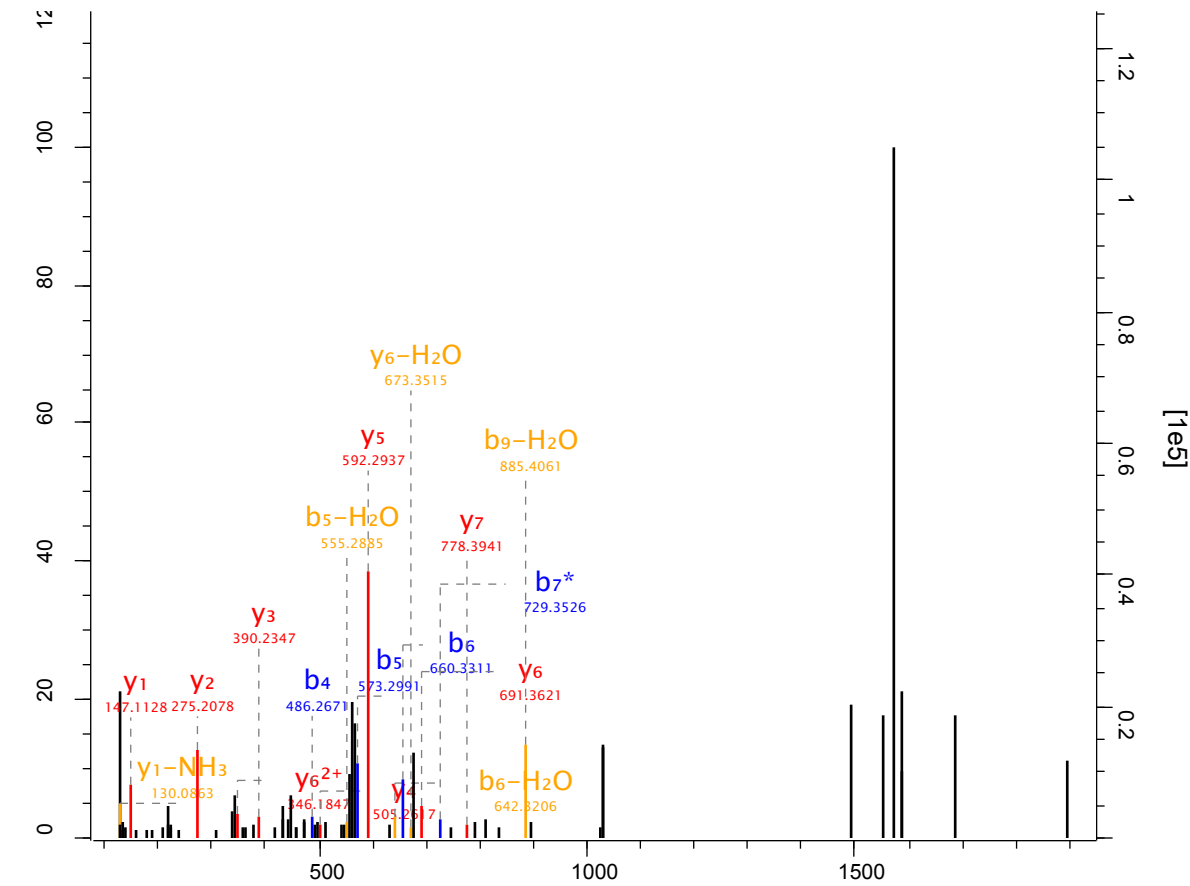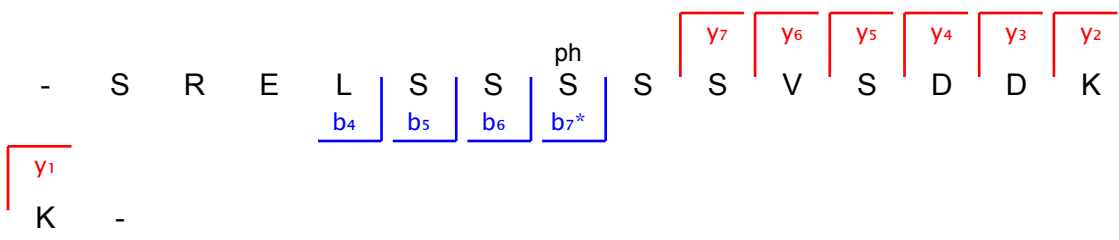

Raw file Scan Method Score m/z  
 Recip\_2\_34\_38 13453 FTMS; HCD 256.51 1392.61

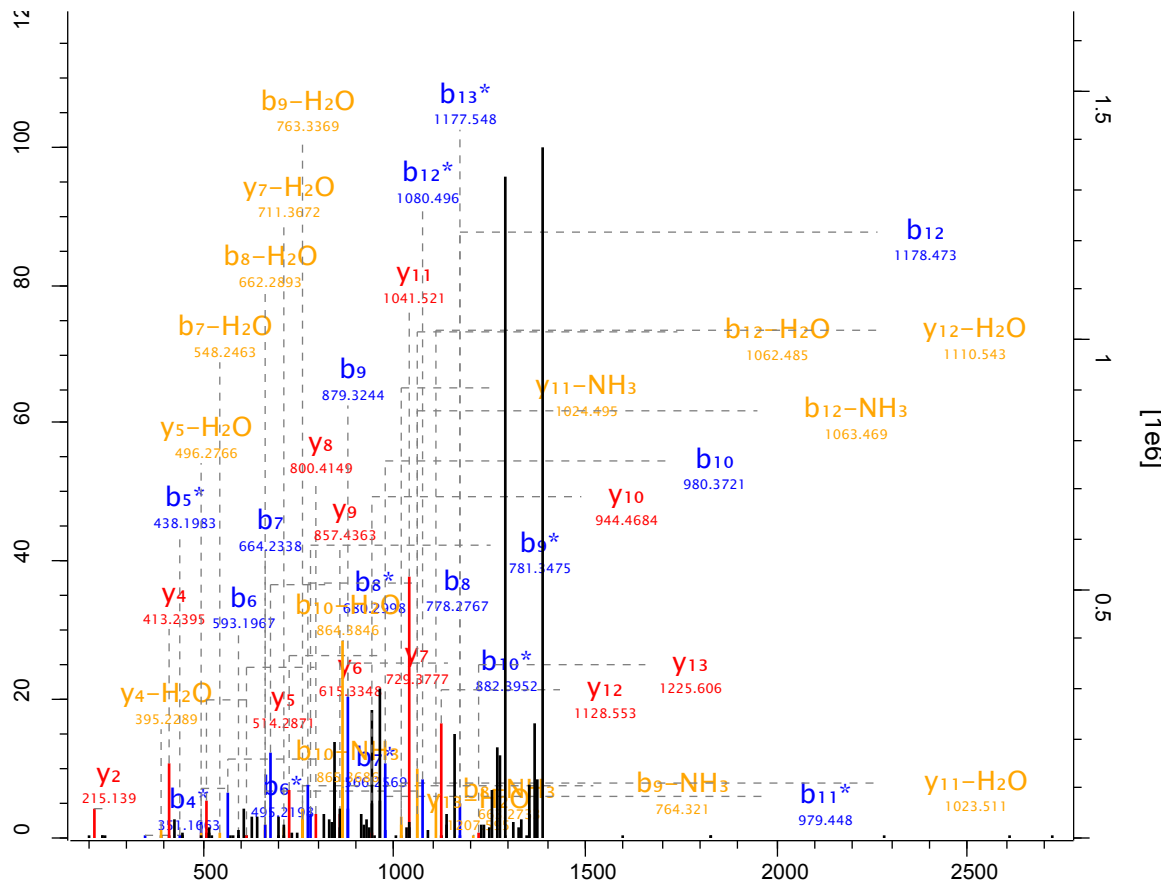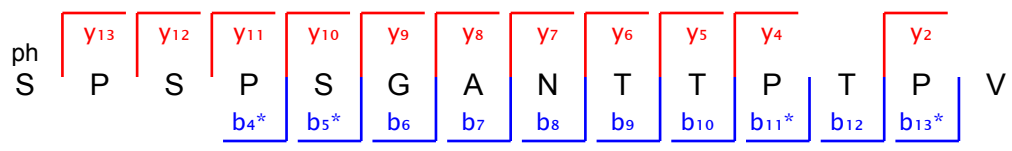



Raw file Scan Method Score m/z  
 Recip\_2\_34\_38 13501 FTMS; HCD 84.17 564.76

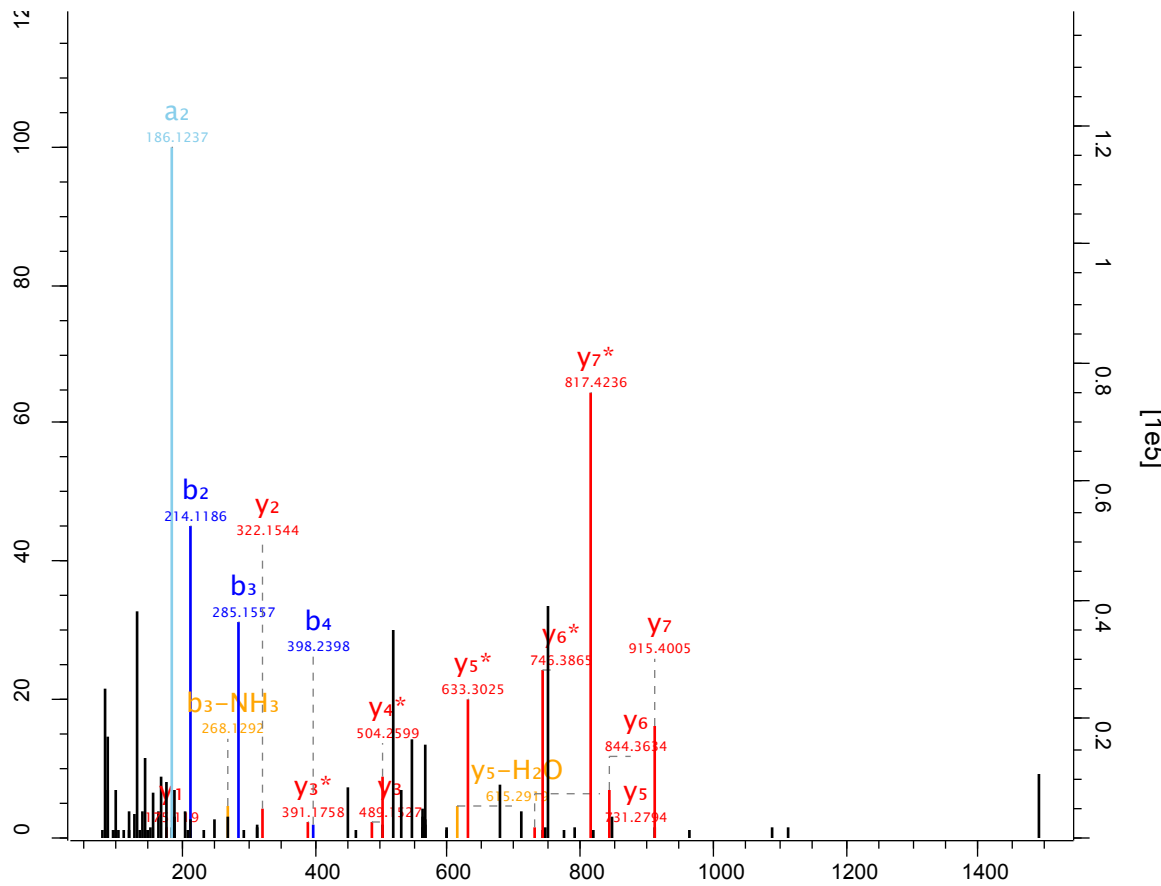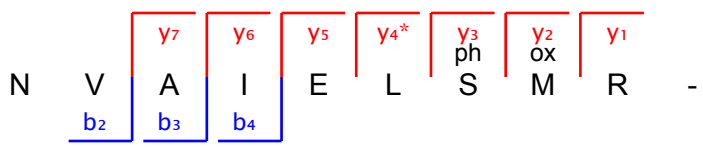

Raw file Scan Method Score m/z  
 Recip\_2\_34\_38 13543 FTMS; HCD 286.07 863.35

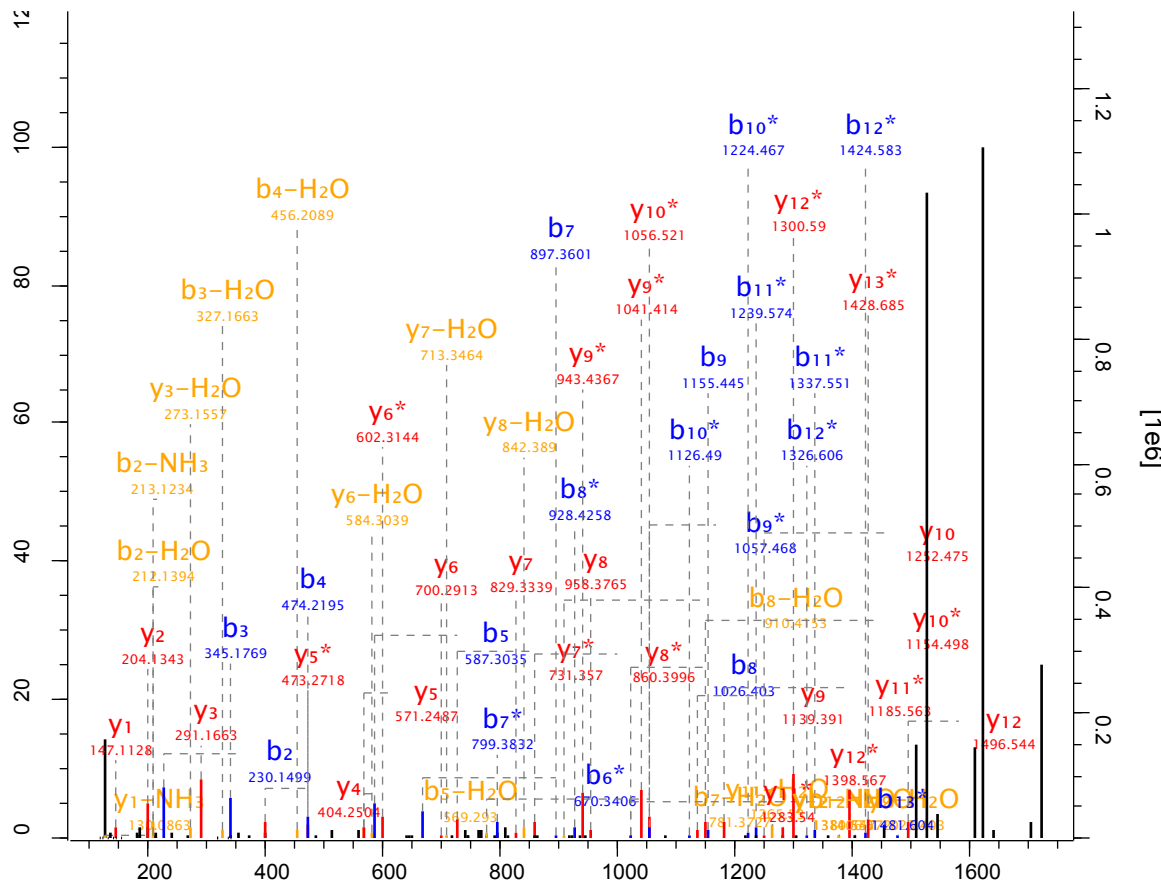

|   |                   |                 |                   |                 |                      |                |                |                |                      |                   |                   |                   |                |
|---|-------------------|-----------------|-------------------|-----------------|----------------------|----------------|----------------|----------------|----------------------|-------------------|-------------------|-------------------|----------------|
|   | y <sub>13</sub> * | y <sub>12</sub> | y <sub>11</sub> * | y <sub>10</sub> | y <sub>9</sub><br>ph | y <sub>8</sub> | y <sub>7</sub> | y <sub>6</sub> | y <sub>5</sub><br>ph | y <sub>4</sub>    | y <sub>3</sub>    | y <sub>2</sub>    | y <sub>1</sub> |
| T | K                 | D               | E                 | L               | T                    | E              | E              | E              | S                    | L                 | S                 | G                 | K              |
|   | b <sub>2</sub>    | b <sub>3</sub>  | b <sub>4</sub>    | b <sub>5</sub>  | b <sub>6</sub> *     | b <sub>7</sub> | b <sub>8</sub> | b <sub>9</sub> | b <sub>10</sub> *    | b <sub>11</sub> * | b <sub>12</sub> * | b <sub>13</sub> * |                |

Raw file Scan Method Score m/z  
 Recip\_2\_34\_38 13637 FTMS; HCD 70.78 996.4

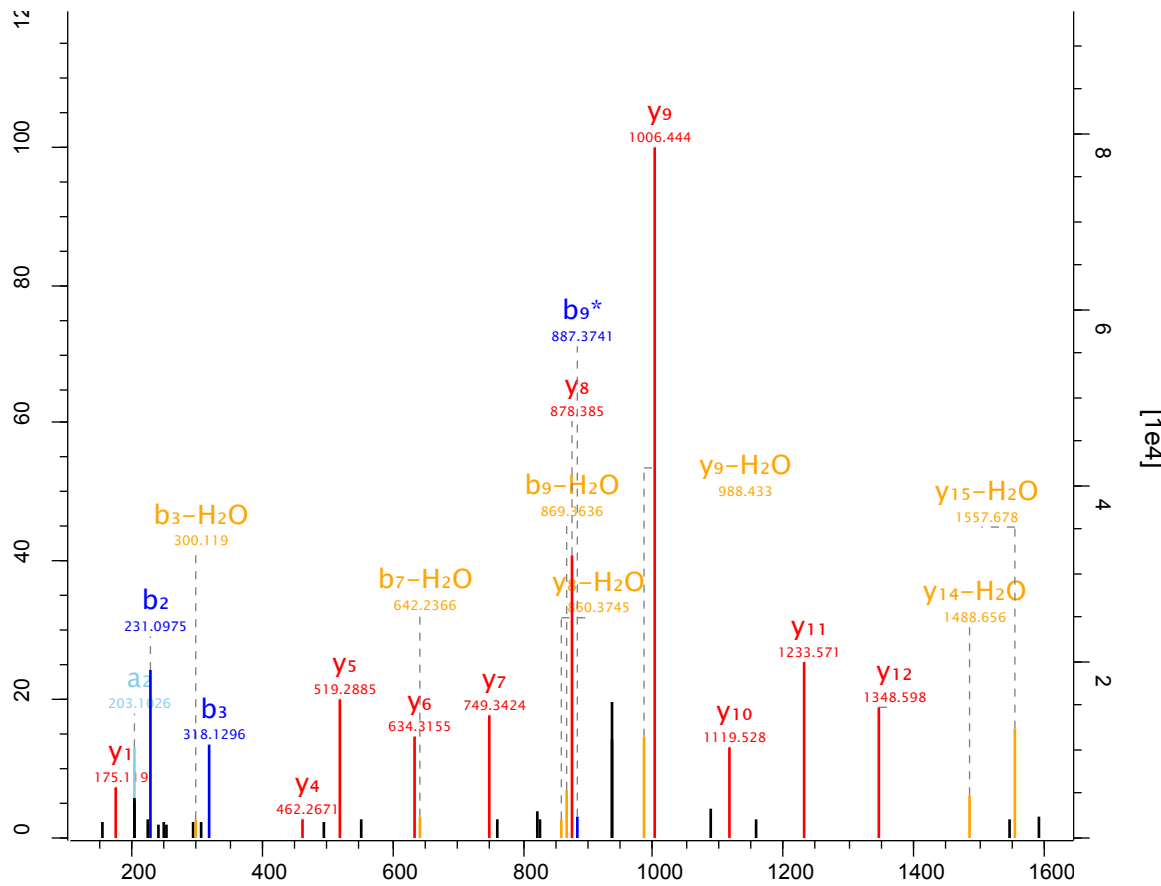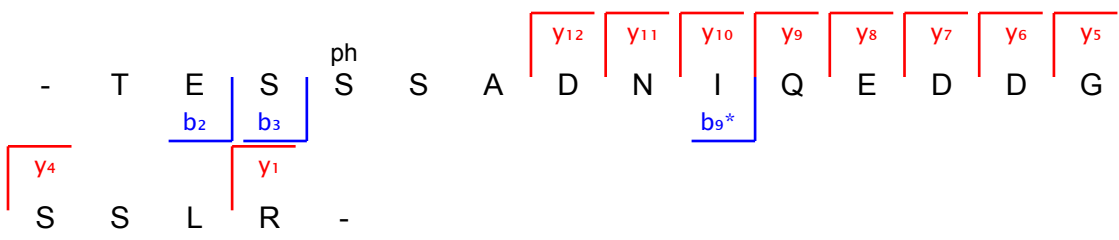

Raw file Scan Method Score m/z  
 Recip\_2\_34\_38 13745 FTMS; HCD 102.07 941.88

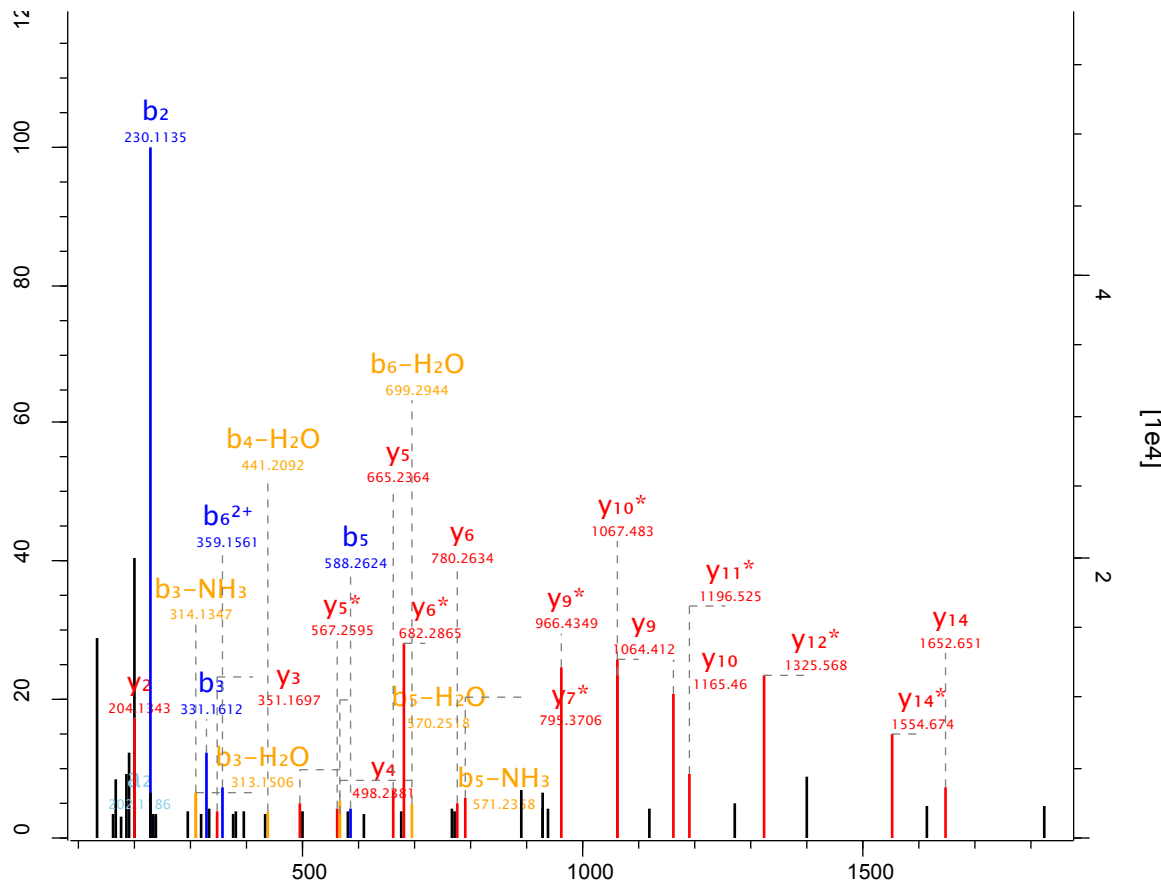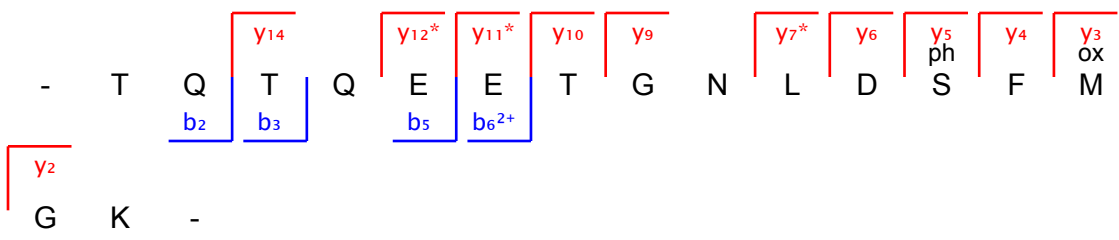

Raw file Scan Method Score m/z  
 Recip\_2\_34\_38 14066 FTMS; HCD 45.35 874.89

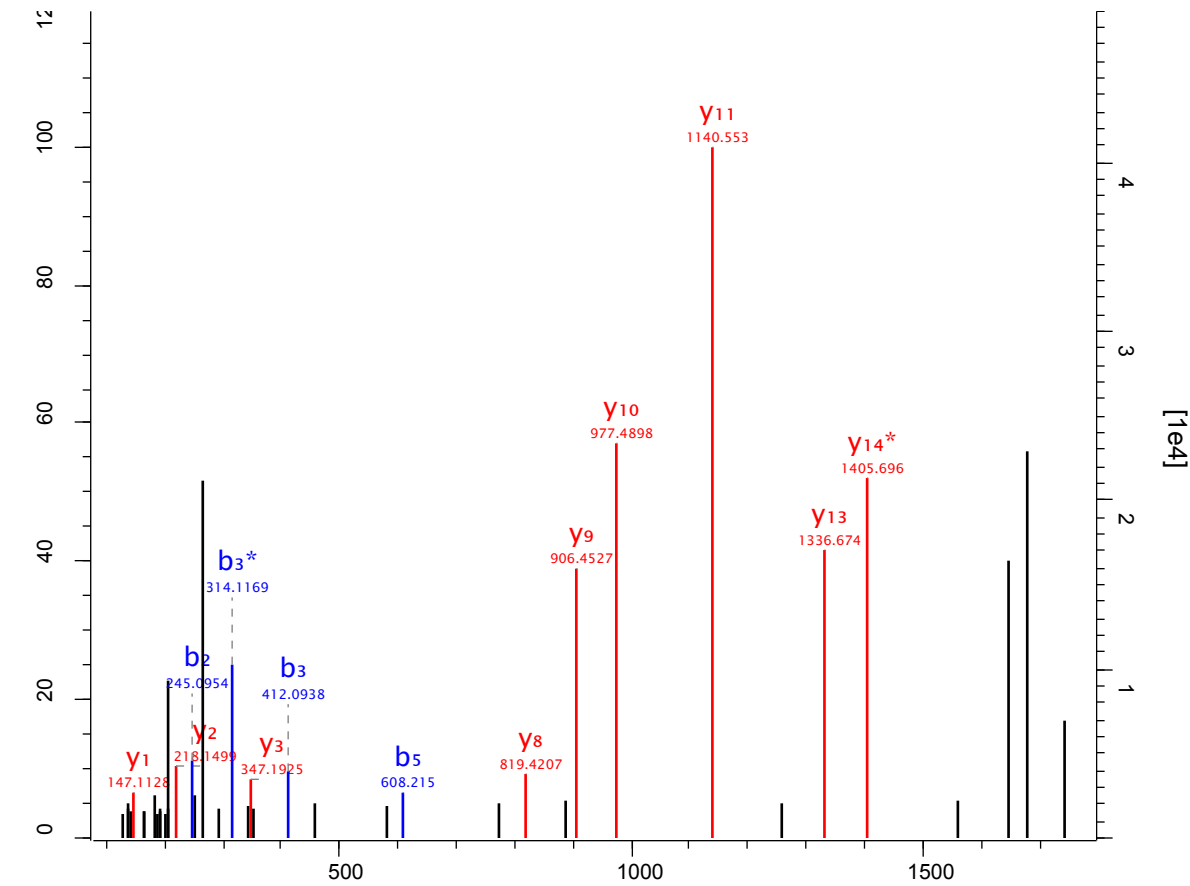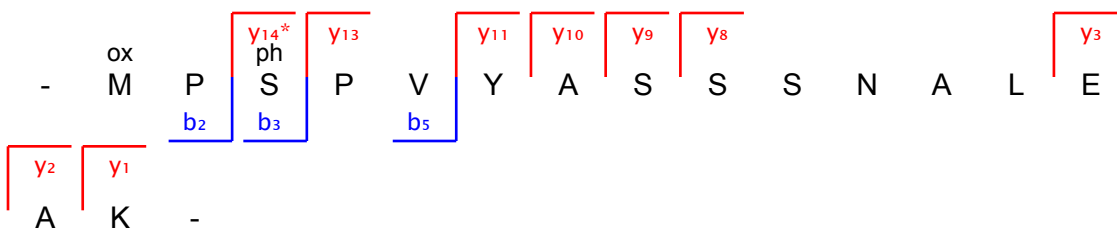

Raw file Scan Method Score m/z  
 Recip\_2\_34\_38 14072 FTMS; HCD 51.77 714.81

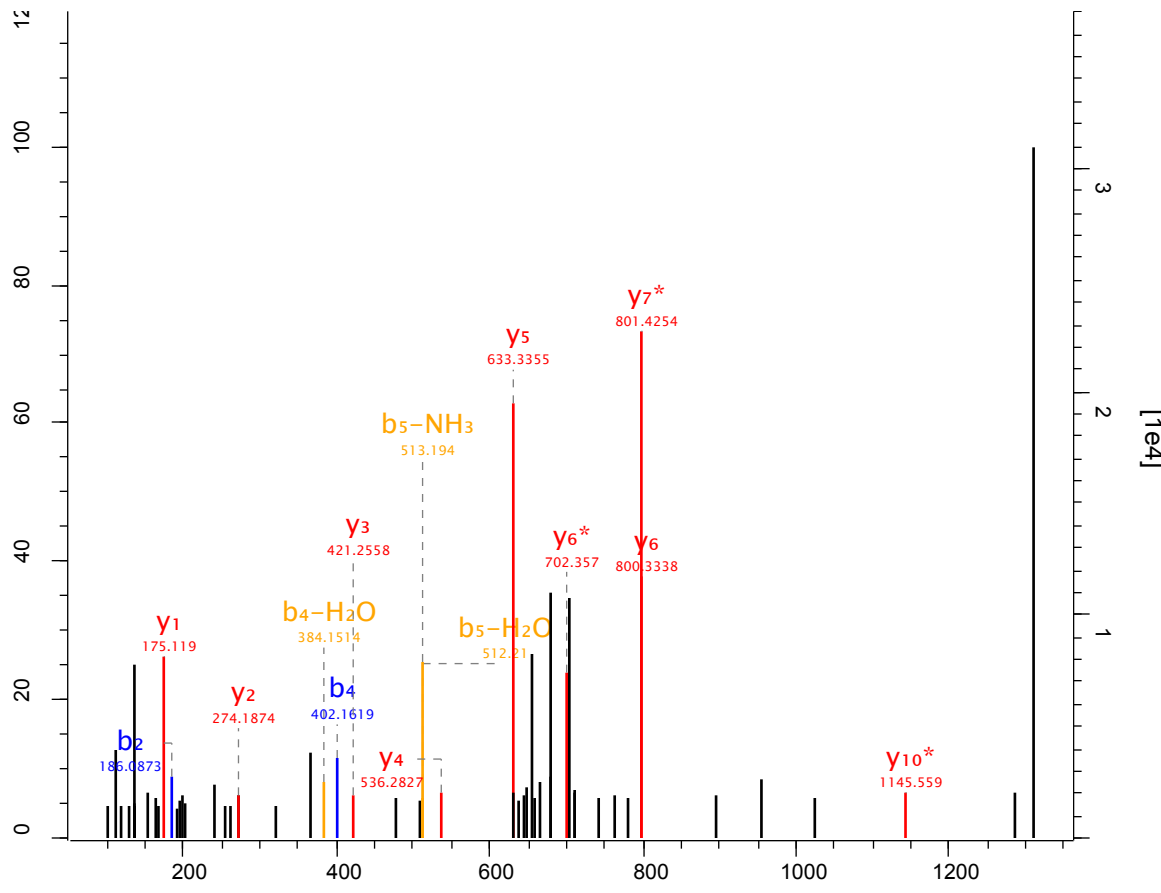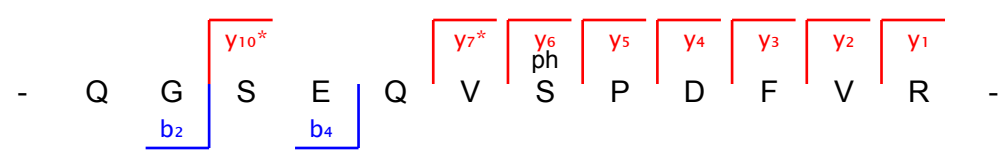

Raw file Scan Method Score m/z  
 Recip\_2\_34\_38 14141 FTMS; HCD 77.04 820.33

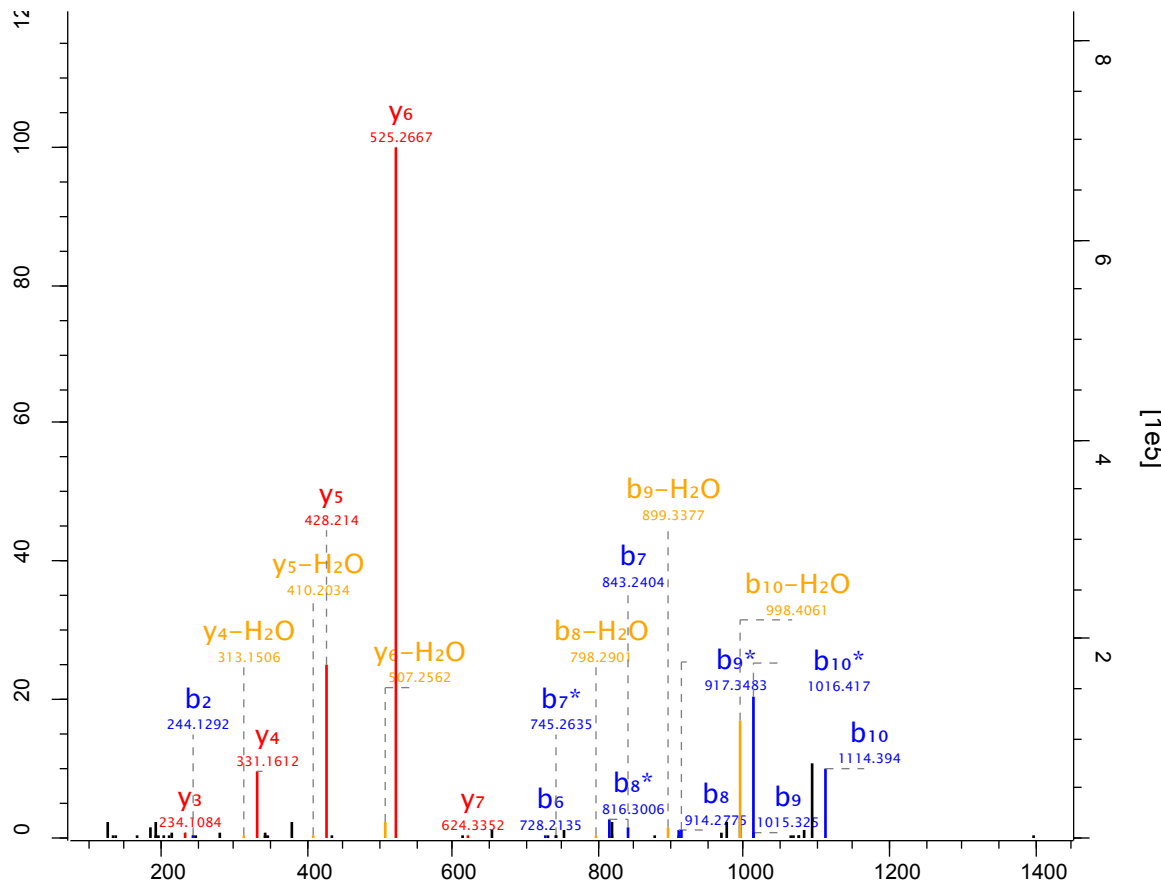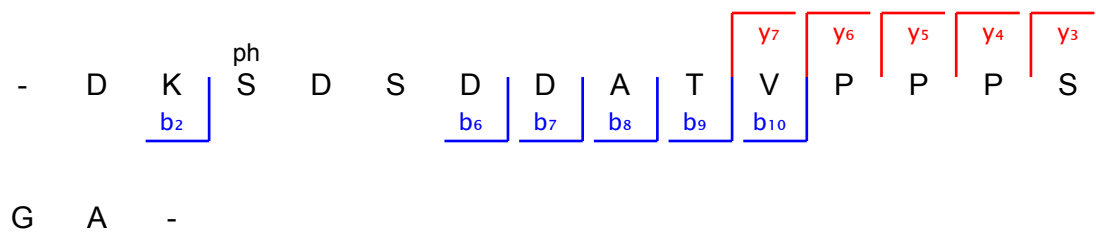

Raw file Scan Method Score m/z  
 Recip\_2\_34\_38 14215 FTMS; HCD 95.26 636.26

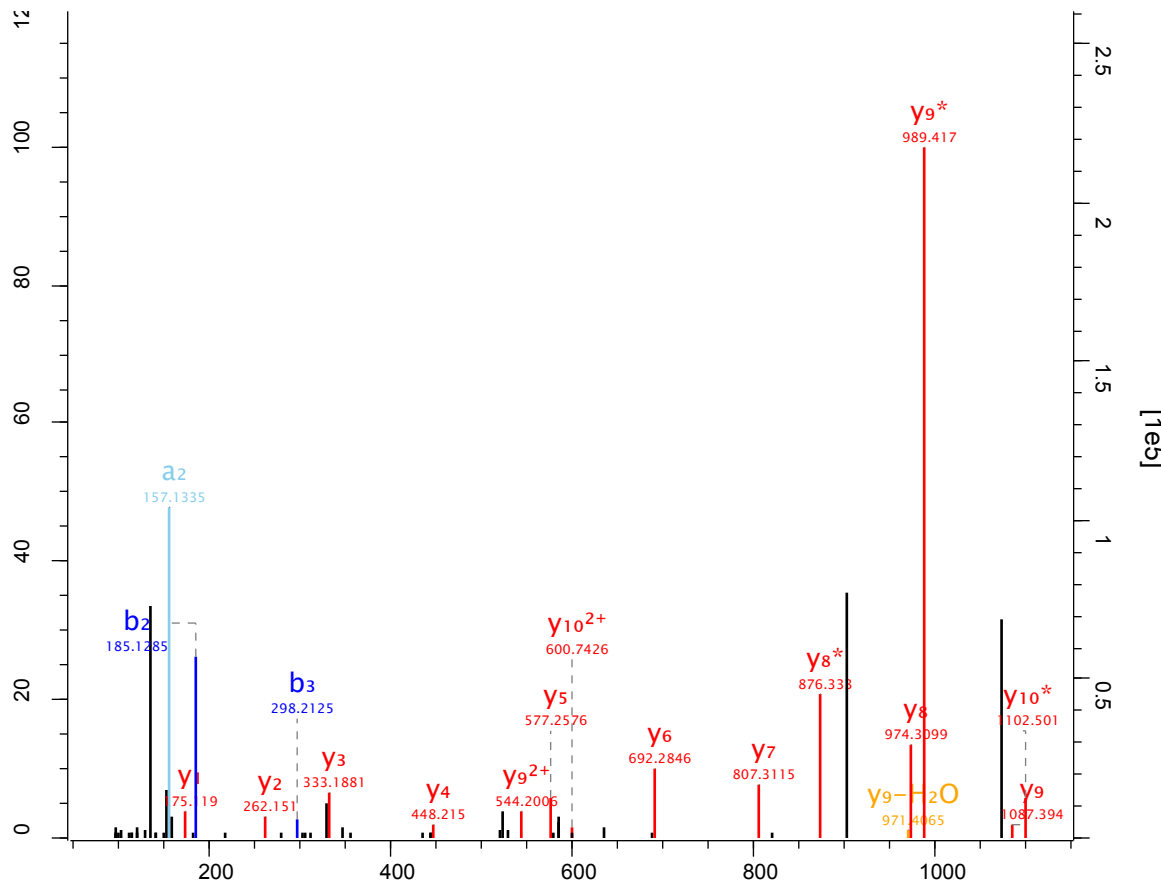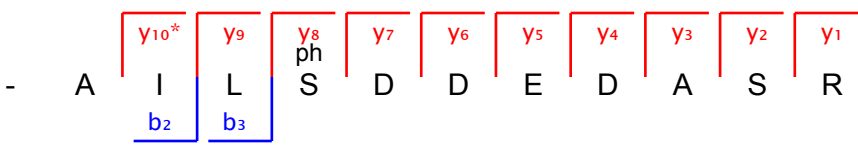



Raw file Scan Method Score m/z  
 Recip\_2\_34\_38 14293 FTMS; HCD 56.12 745.3

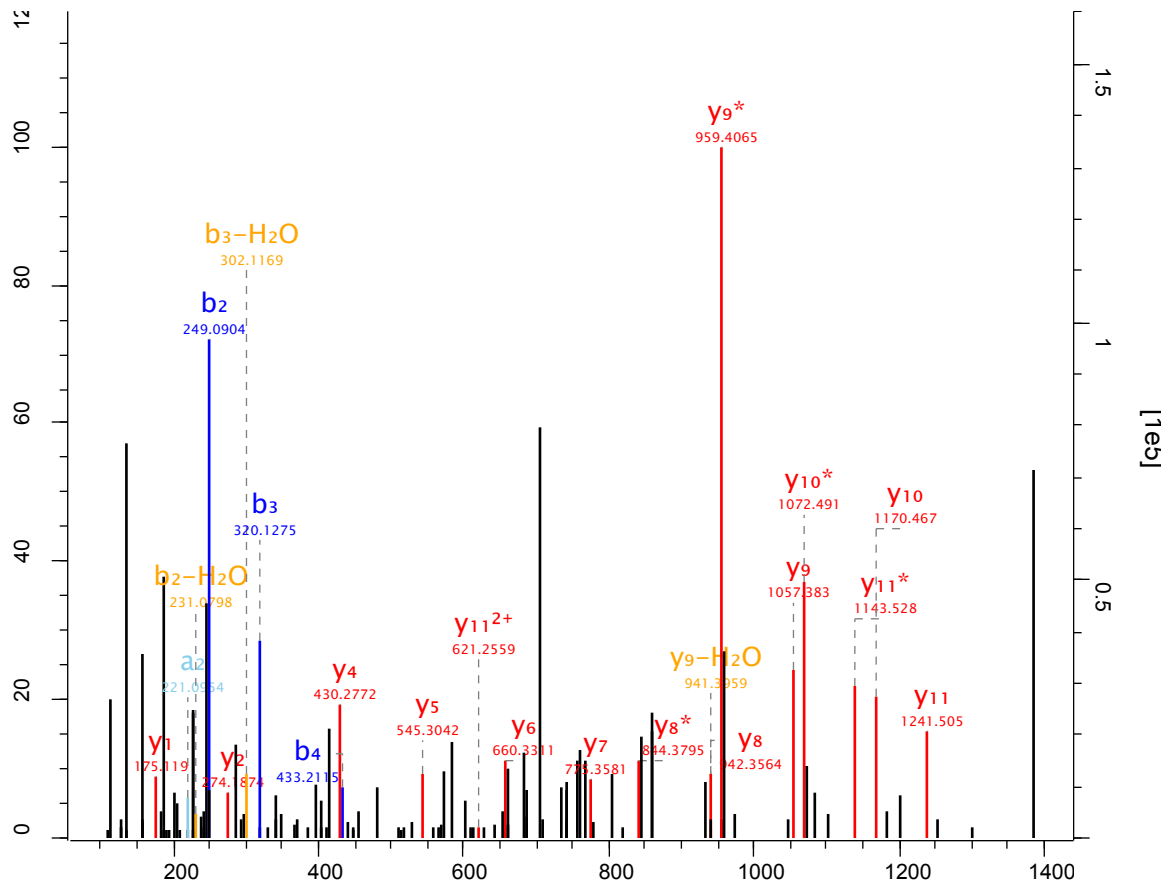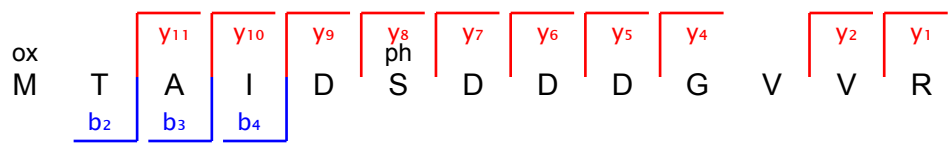

| Raw file      | Scan | Method    | Score | m/z    |
|---------------|------|-----------|-------|--------|
| Recip_2_34_38 | 1430 | FTMS; HCD | 56.02 | 591.89 |

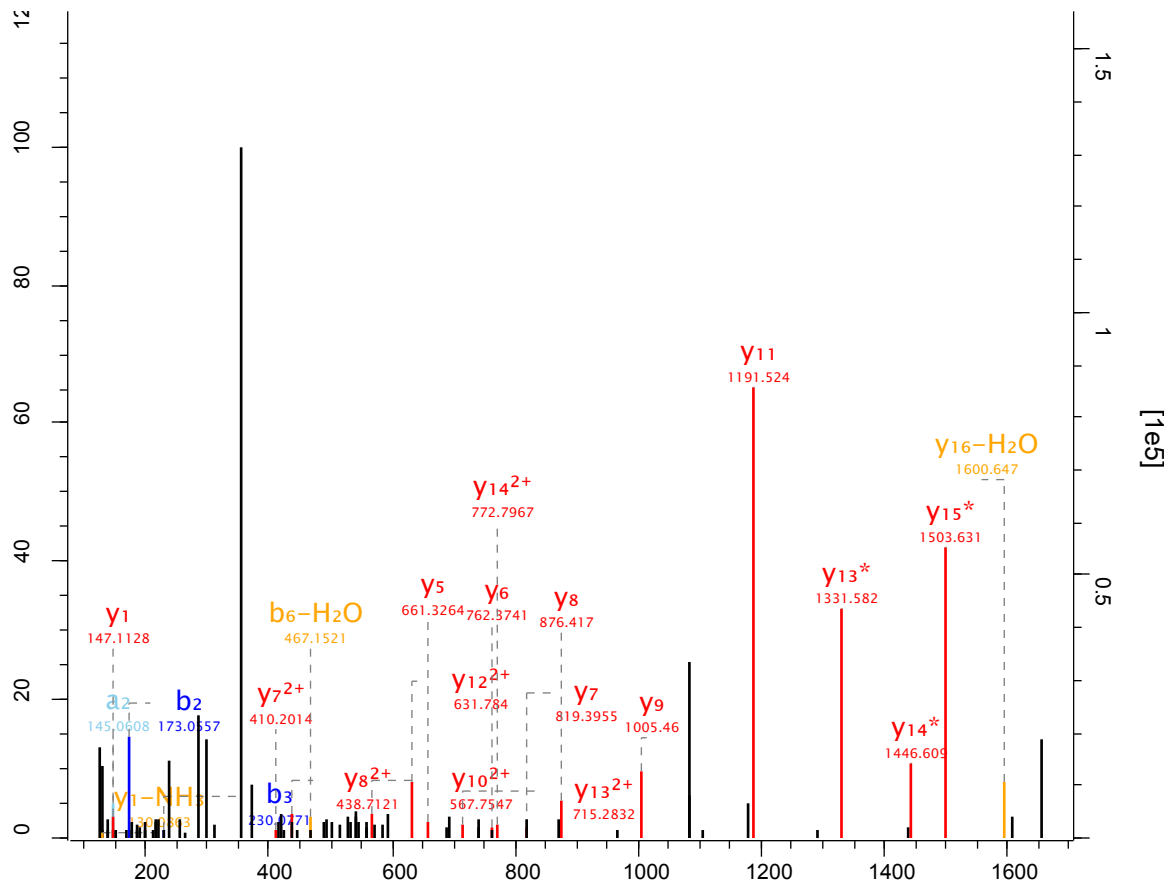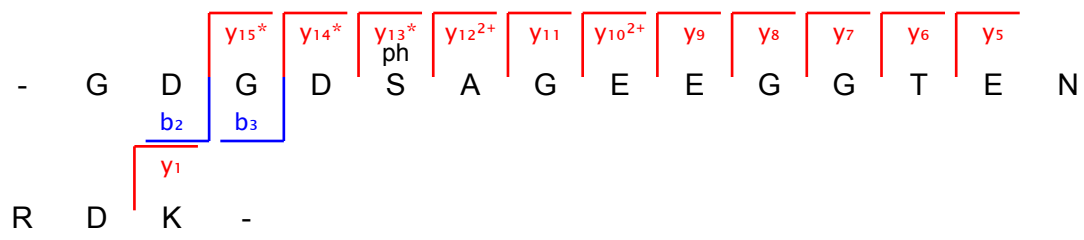

Raw file Scan Method Score m/z  
 Recip\_2\_34\_38 14586 FTMS; HCD 143 504.21

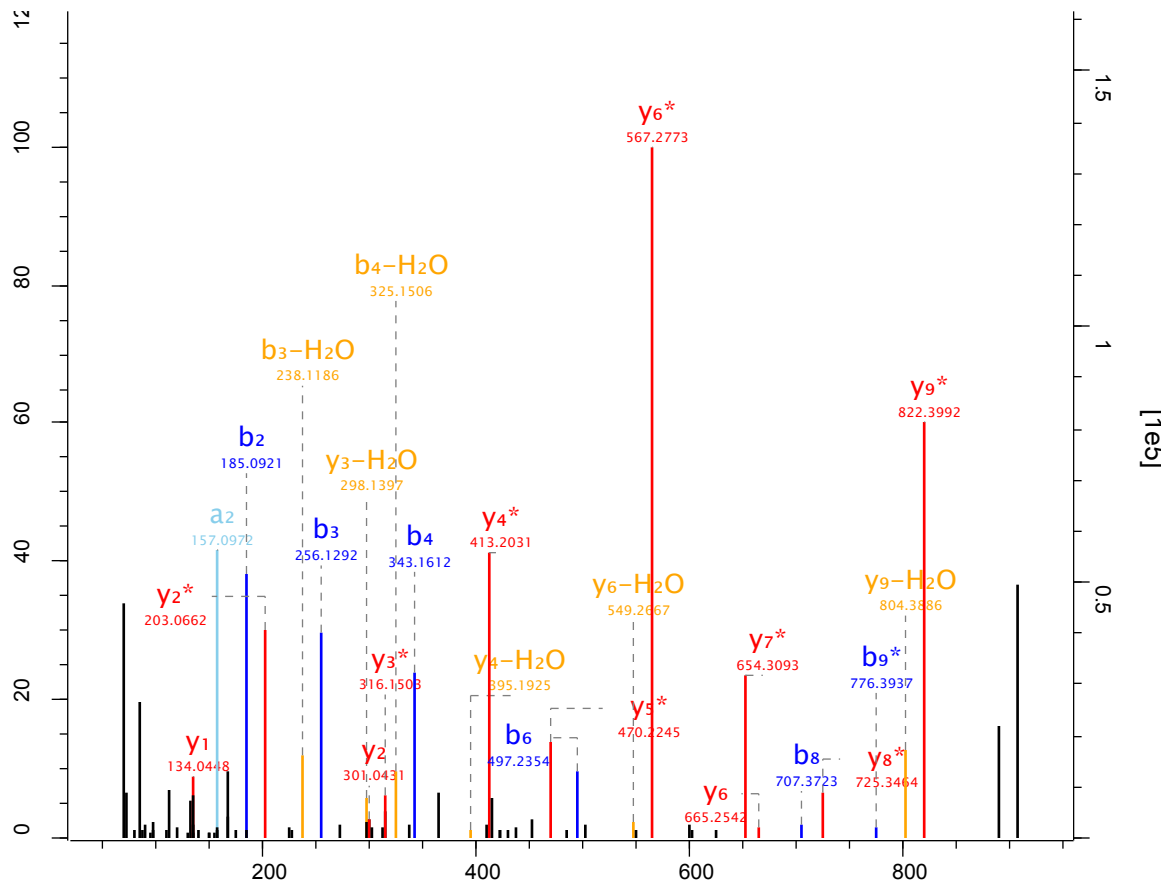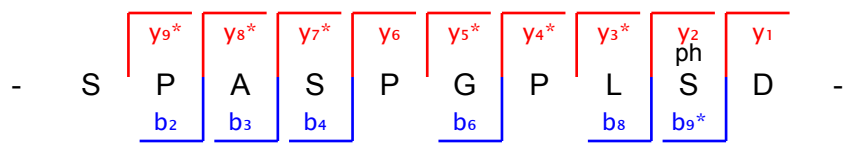

Raw file Scan Method Score m/z  
 Recip\_2\_34\_38 14737 FTMS; HCD 159.65 915.03

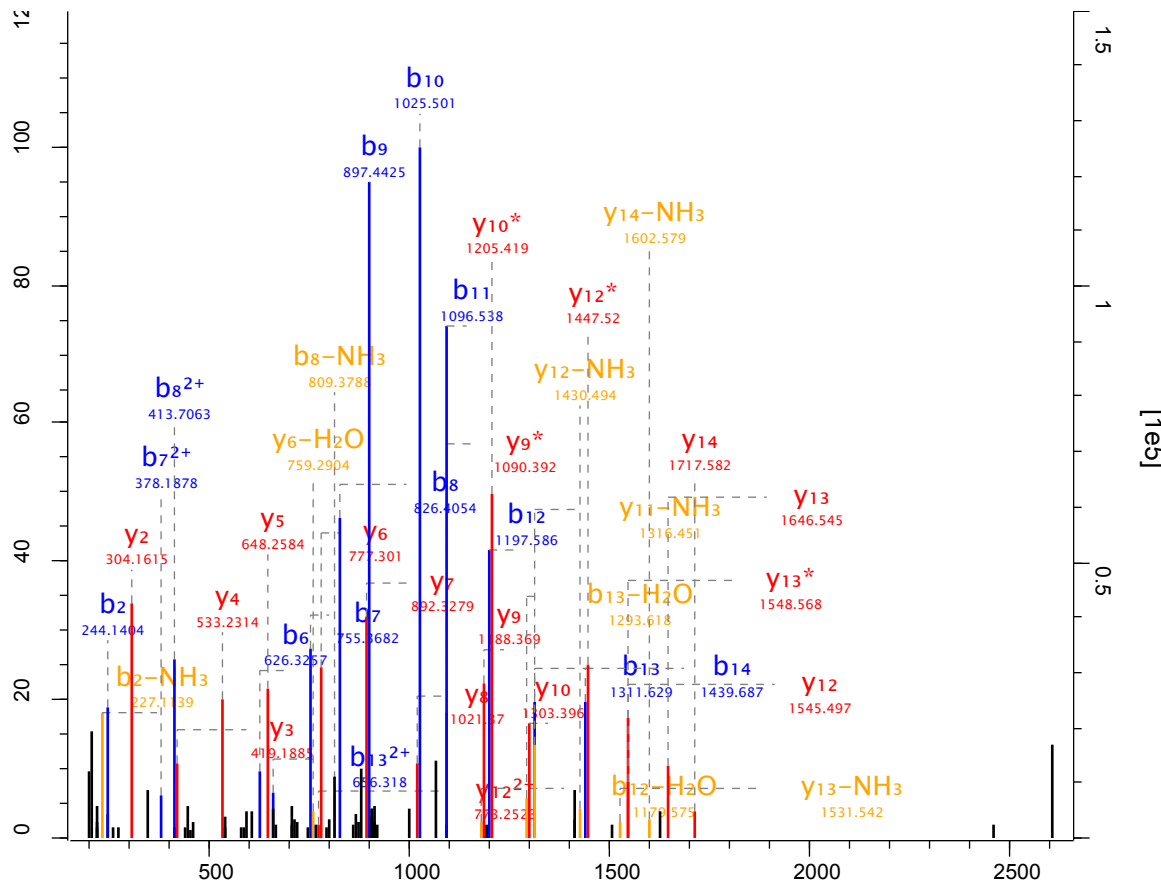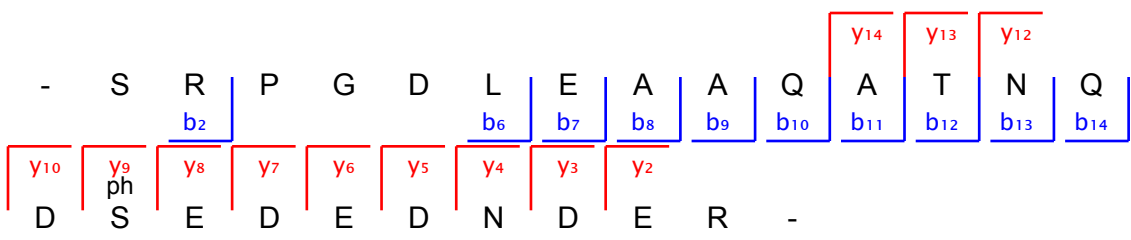

D S E D E D N D E R -

Raw file Scan Method Score m/z  
 Recip\_2\_34\_38 14919 FTMS; HCD 106.28 734.8

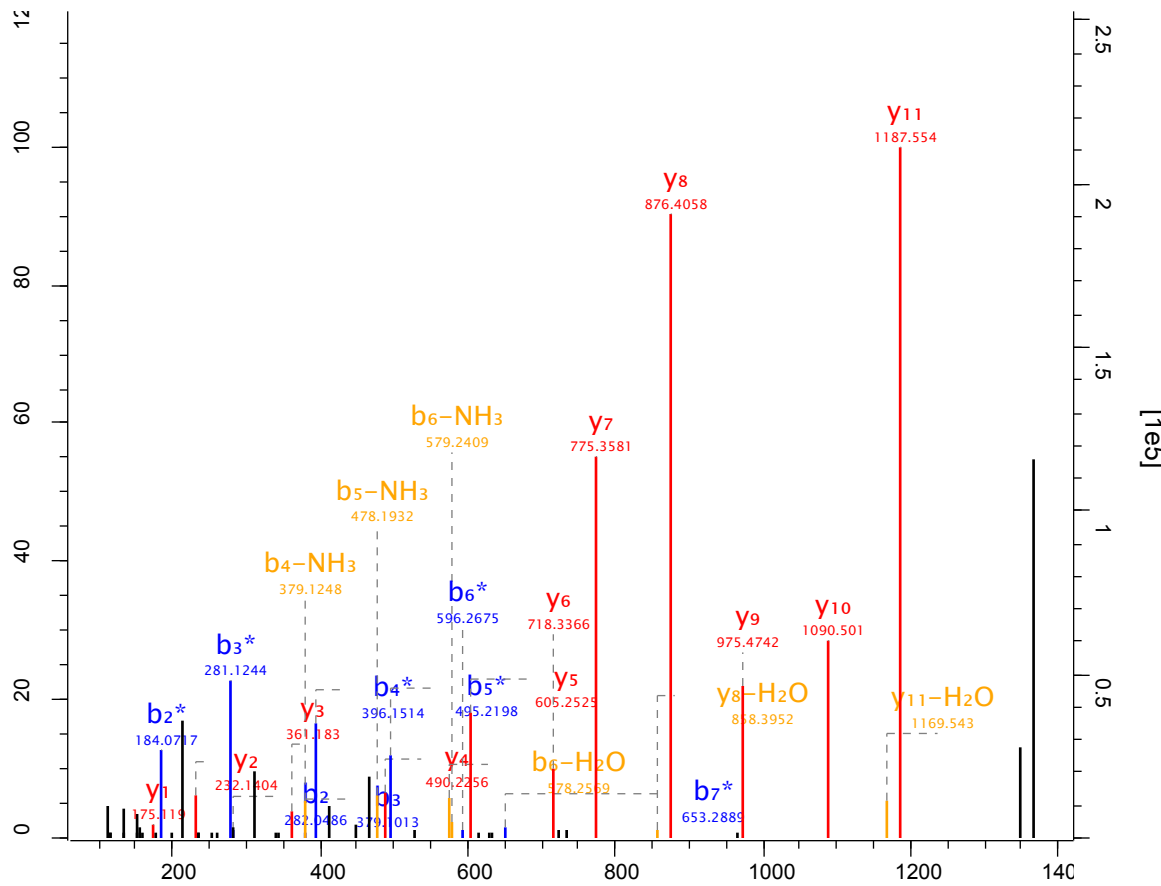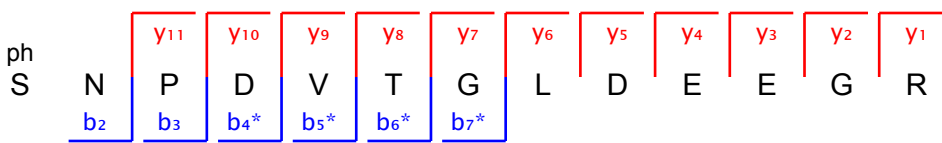

Raw file Scan Method Score m/z  
 Recip\_2\_34\_38 14936 FTMS; HCD 42.03 652.65

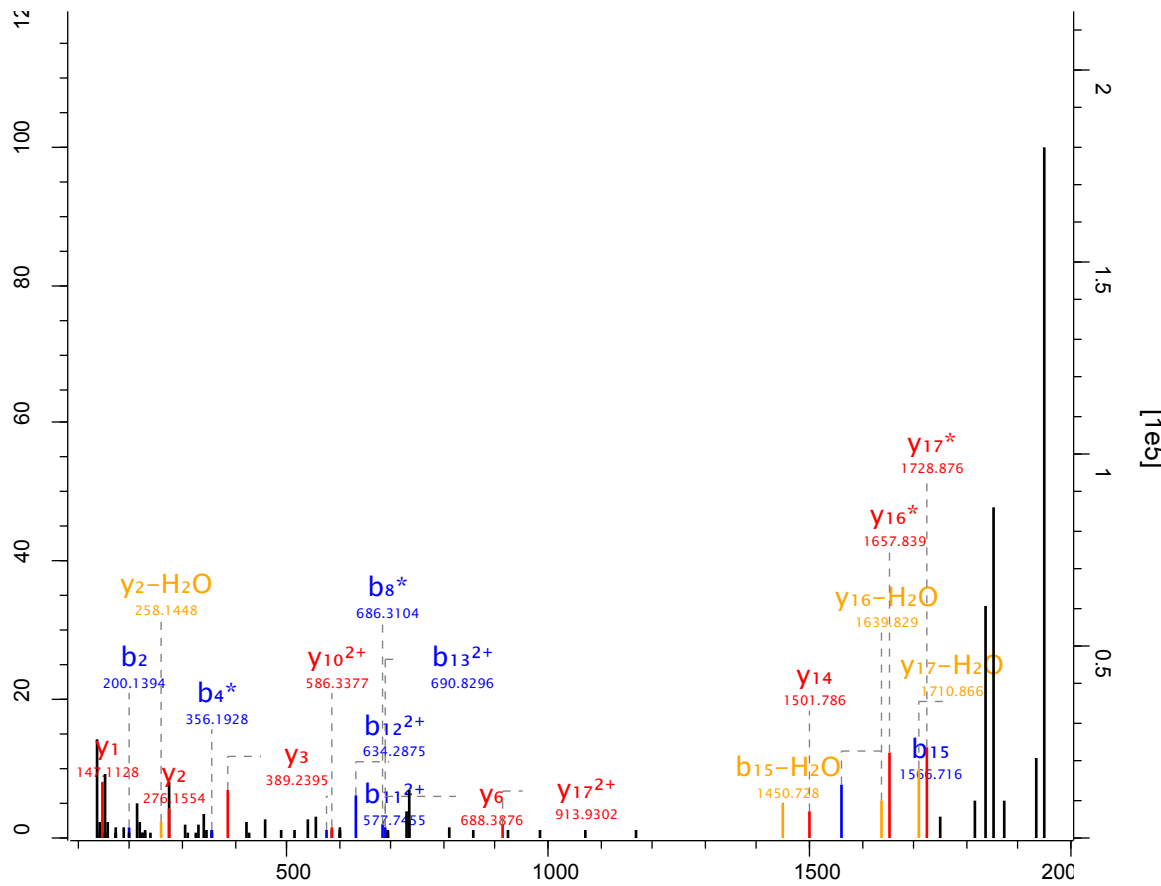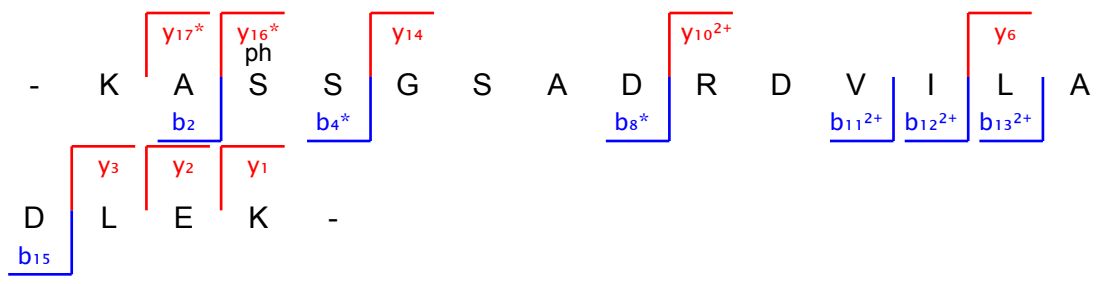

Raw file Scan Method Score m/z  
 Recip\_2\_34\_38 15185 FTMS; HCD 127.83 533.2

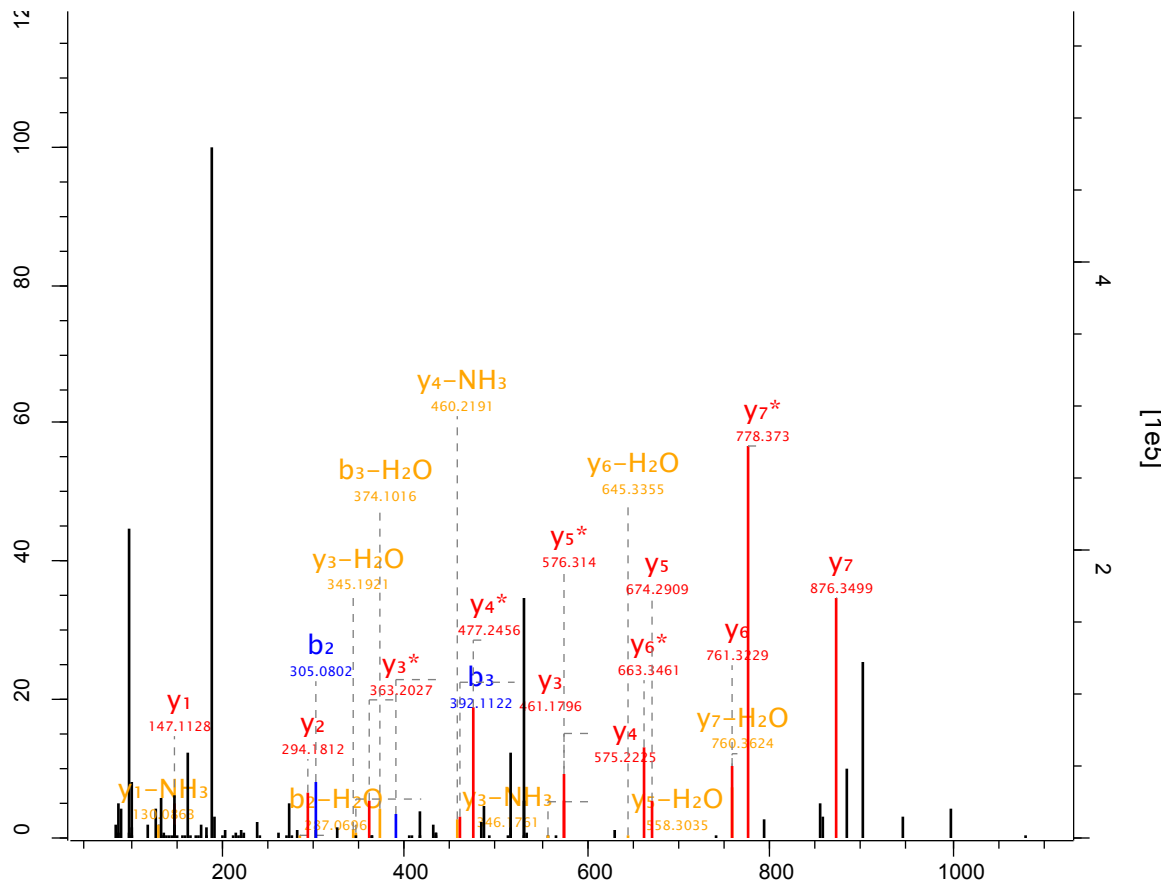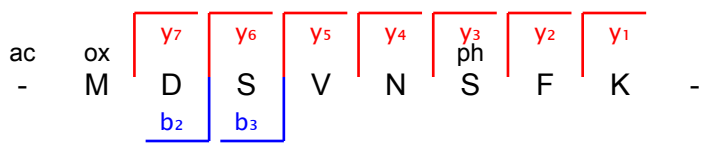

Raw file Scan Method Score m/z  
 Recip\_2\_34\_38 15274 FTMS; HCD 94.57 711.31

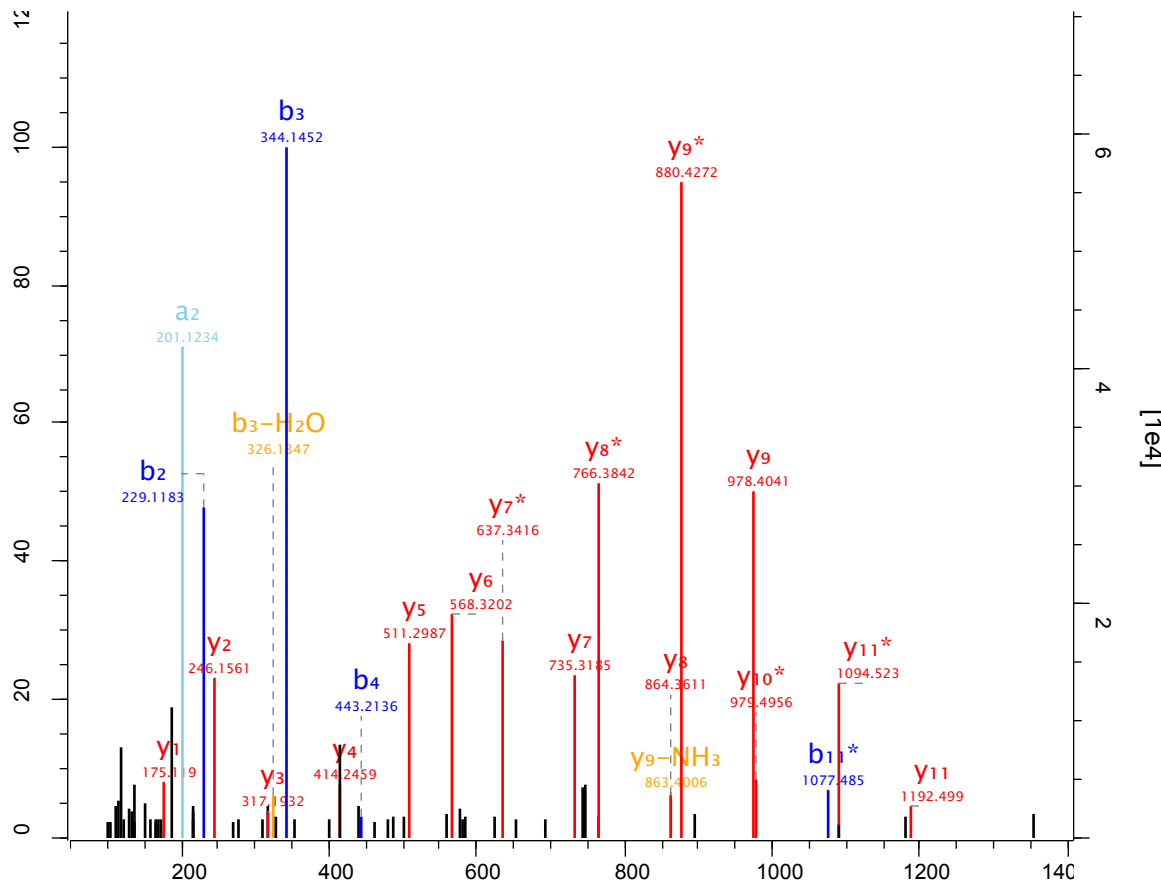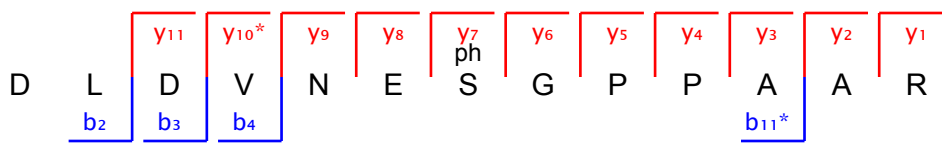



Raw file Scan Method Score m/z  
 Recip\_2\_34\_38 1549 FTMS; HCD 111.65 539.21

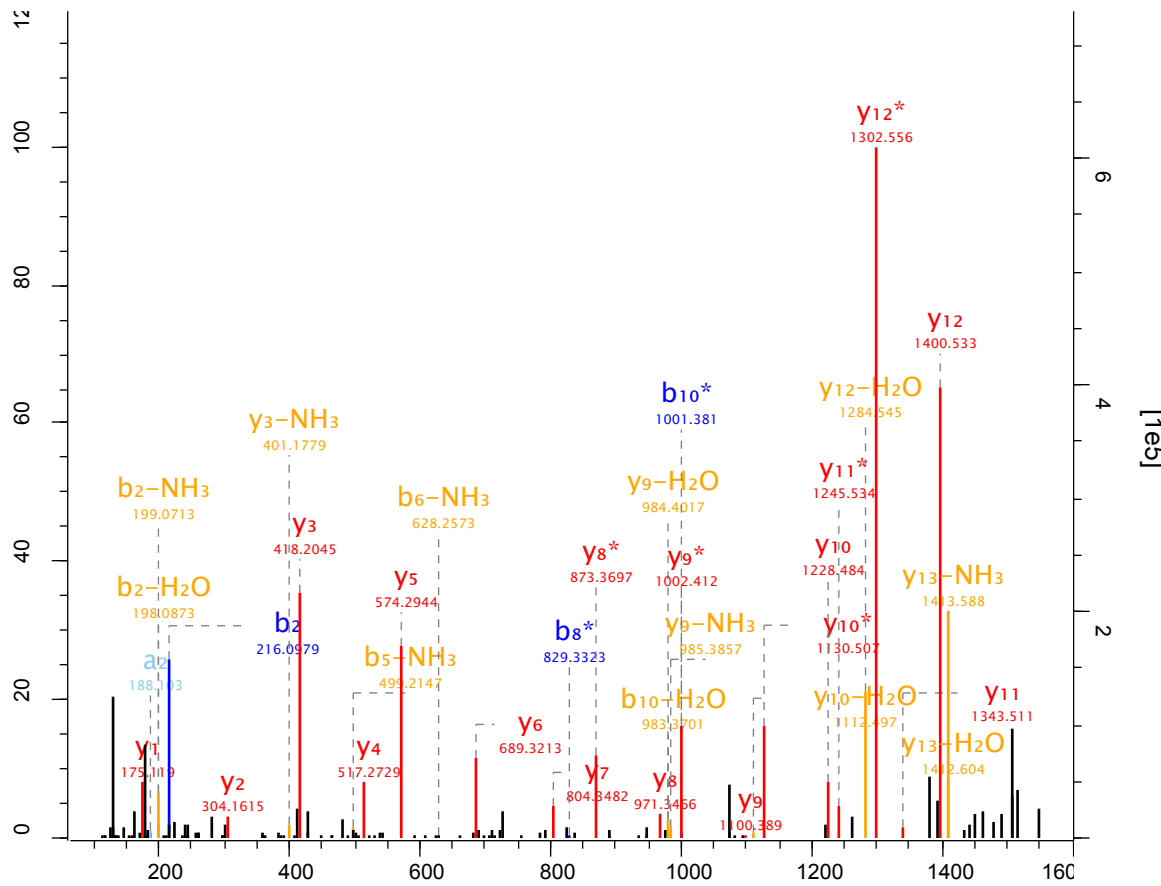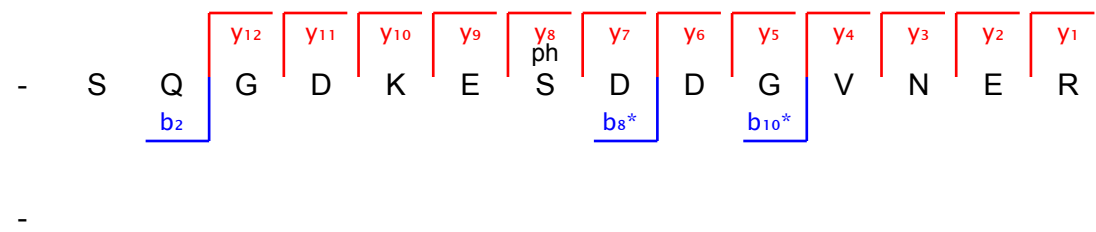

Raw file Scan Method Score m/z  
 Recip\_2\_34\_38 15522 FTMS; HCD 144.57 830.35

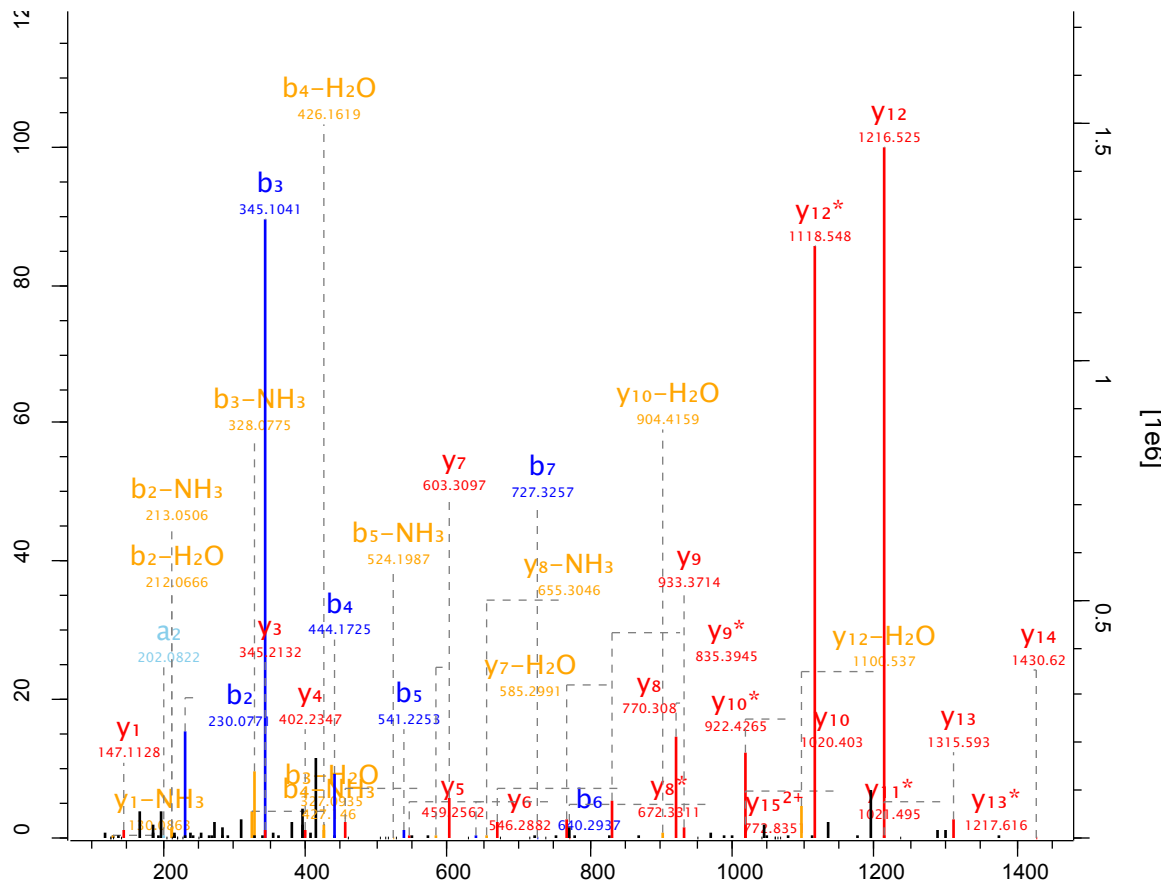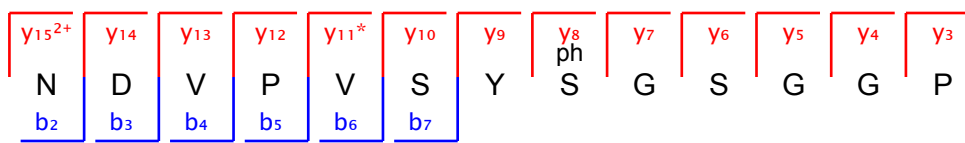

T  
 K -

Raw file Scan Method Score m/z  
 Recip\_2\_34\_38 1574 FTMS; HCD 124.94 607.89

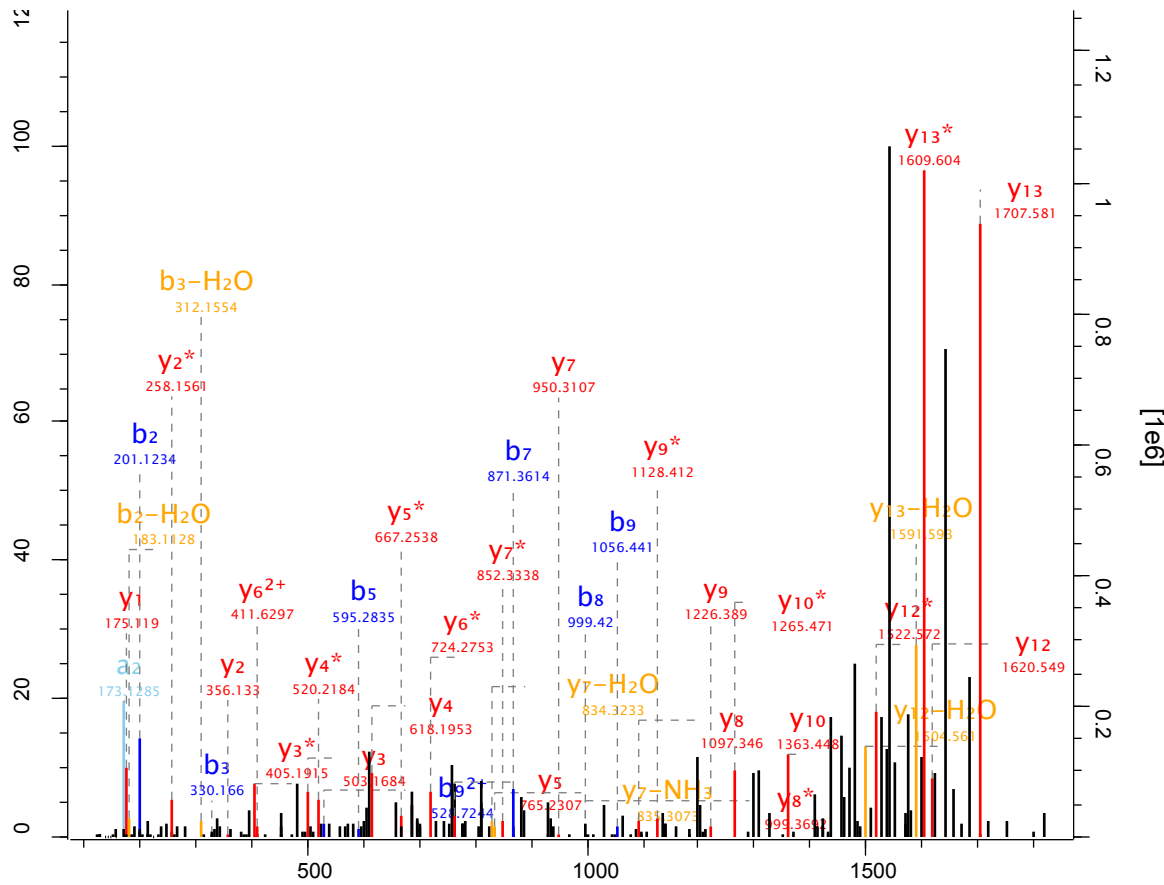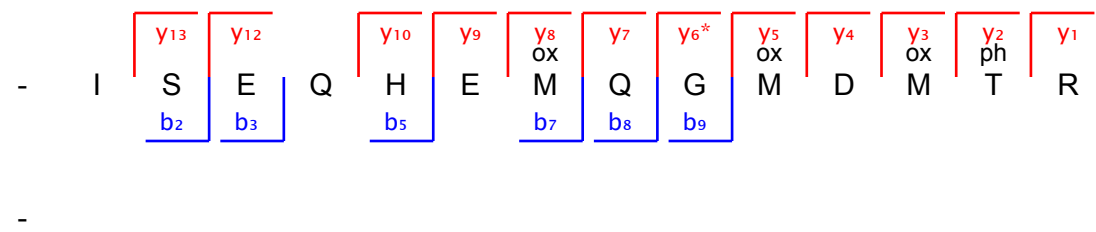

Raw file Scan Method Score m/z  
 Recip\_2\_34\_38 15793 FTMS; HCD 67.4 904.09

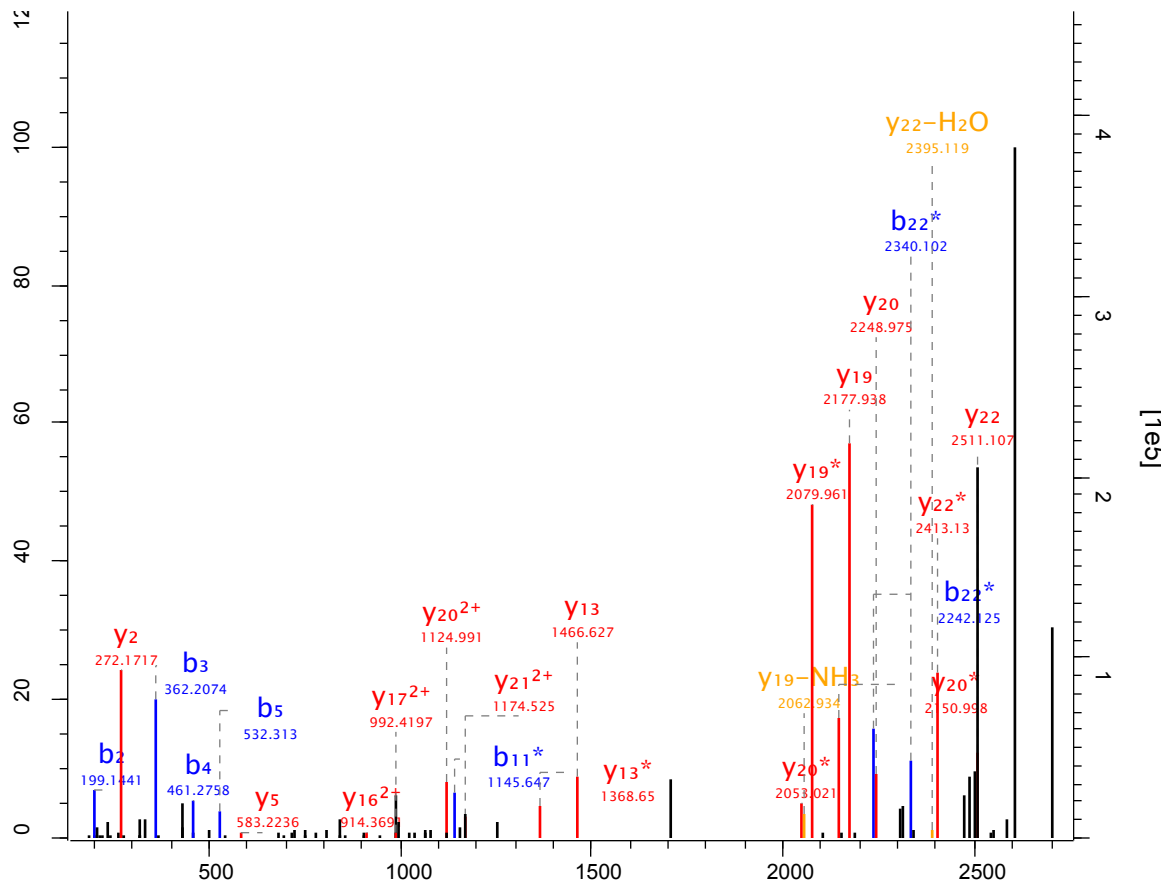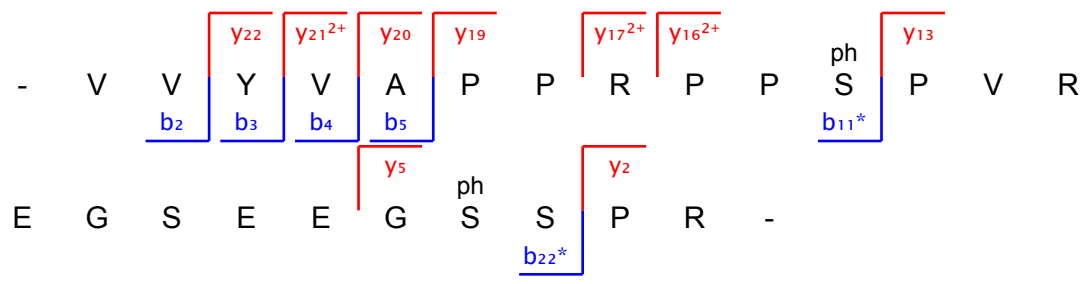

Raw file Scan Method Score m/z  
 Recip\_2\_34\_38 15850 FTMS; HCD 58.71 794.38

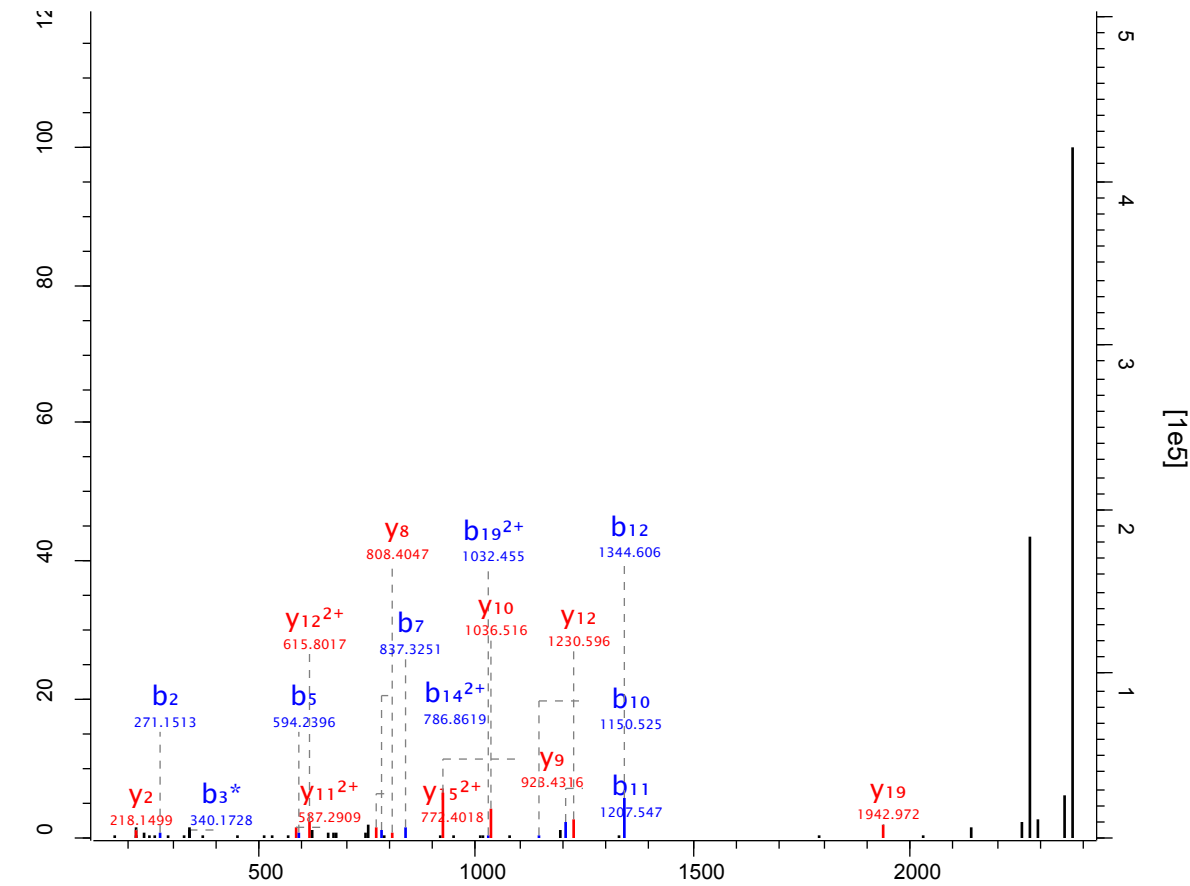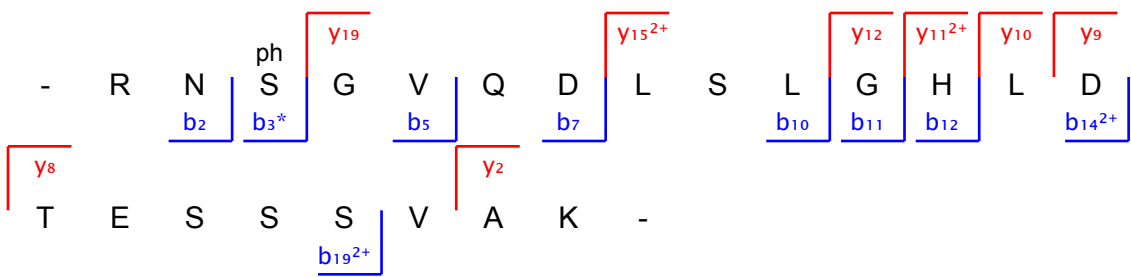

| Raw file      | Scan | Method    | Score | m/z    |
|---------------|------|-----------|-------|--------|
| Recip_2_34_38 | 1588 | FTMS; HCD | 58.7  | 476.73 |

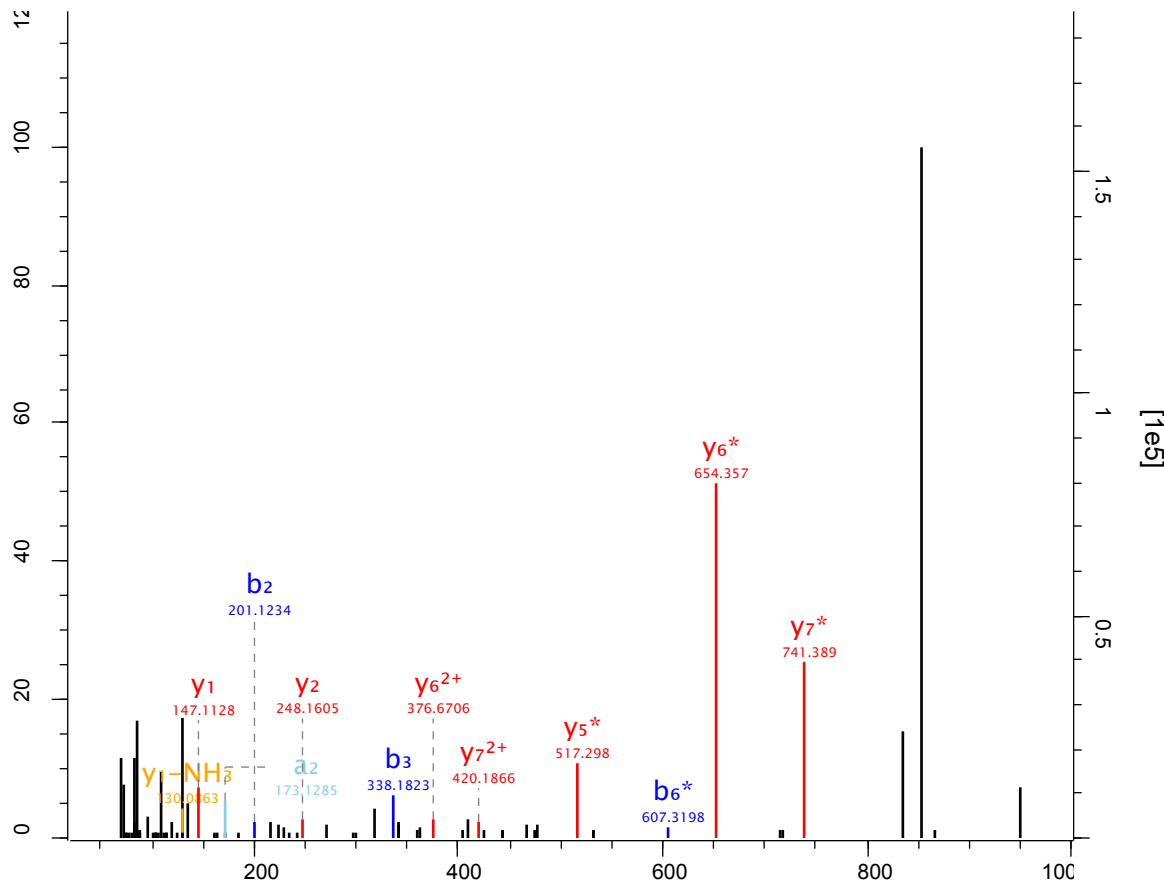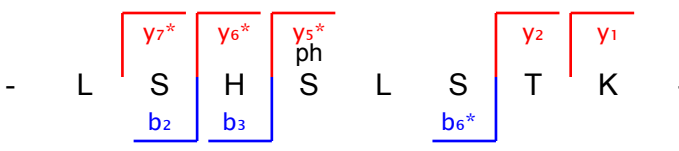

Raw file Scan Method Score m/z  
 Recip\_2\_34\_38 15916 FTMS; HCD 56.92 401.2

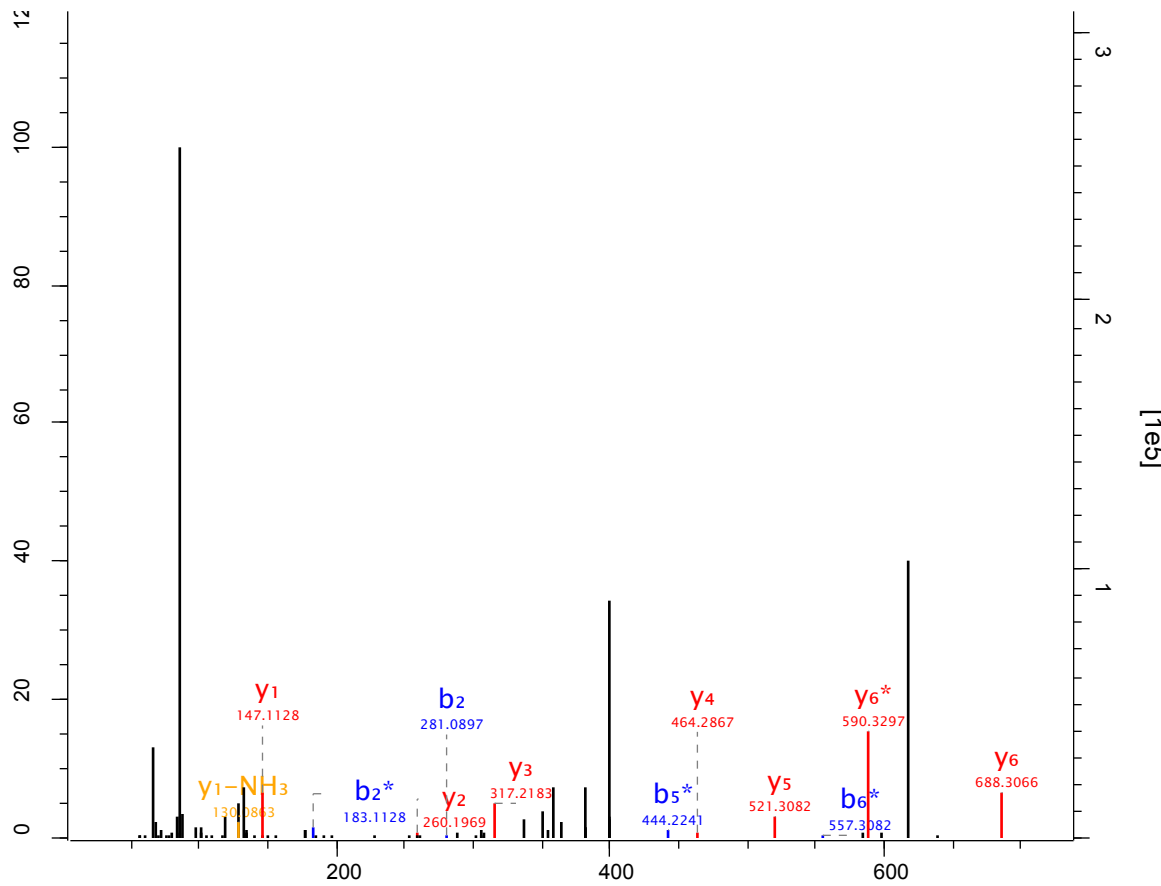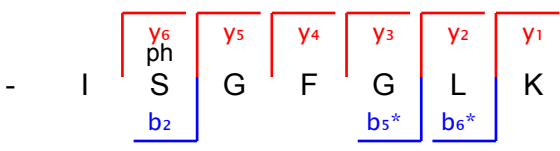

Raw file Scan Method Score m/z  
 Recip\_2\_34\_38 16090 FTMS; HCD 66.02 668.27

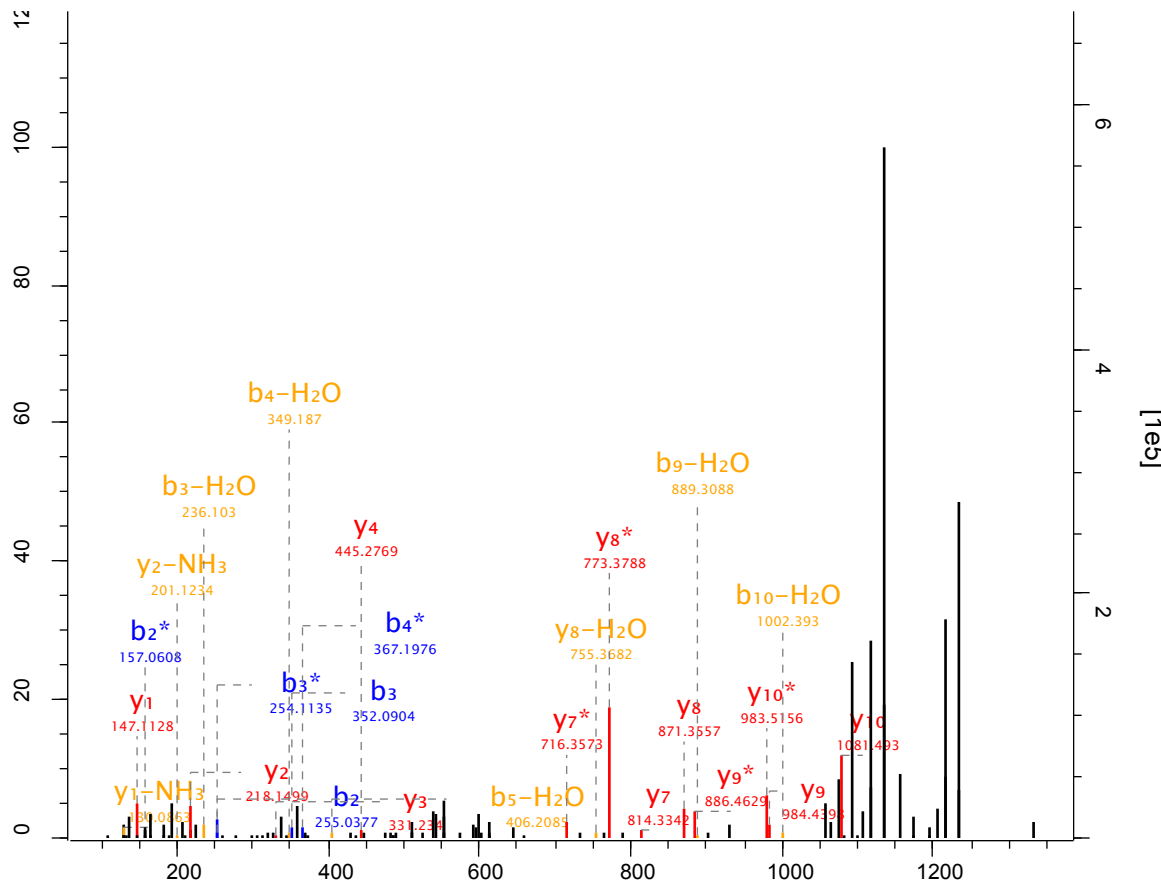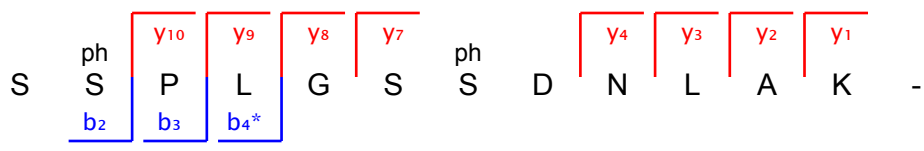



Raw file Scan Method Score m/z  
 Recip\_2\_34\_38 16210 FTMS; HCD 76.89 802.37

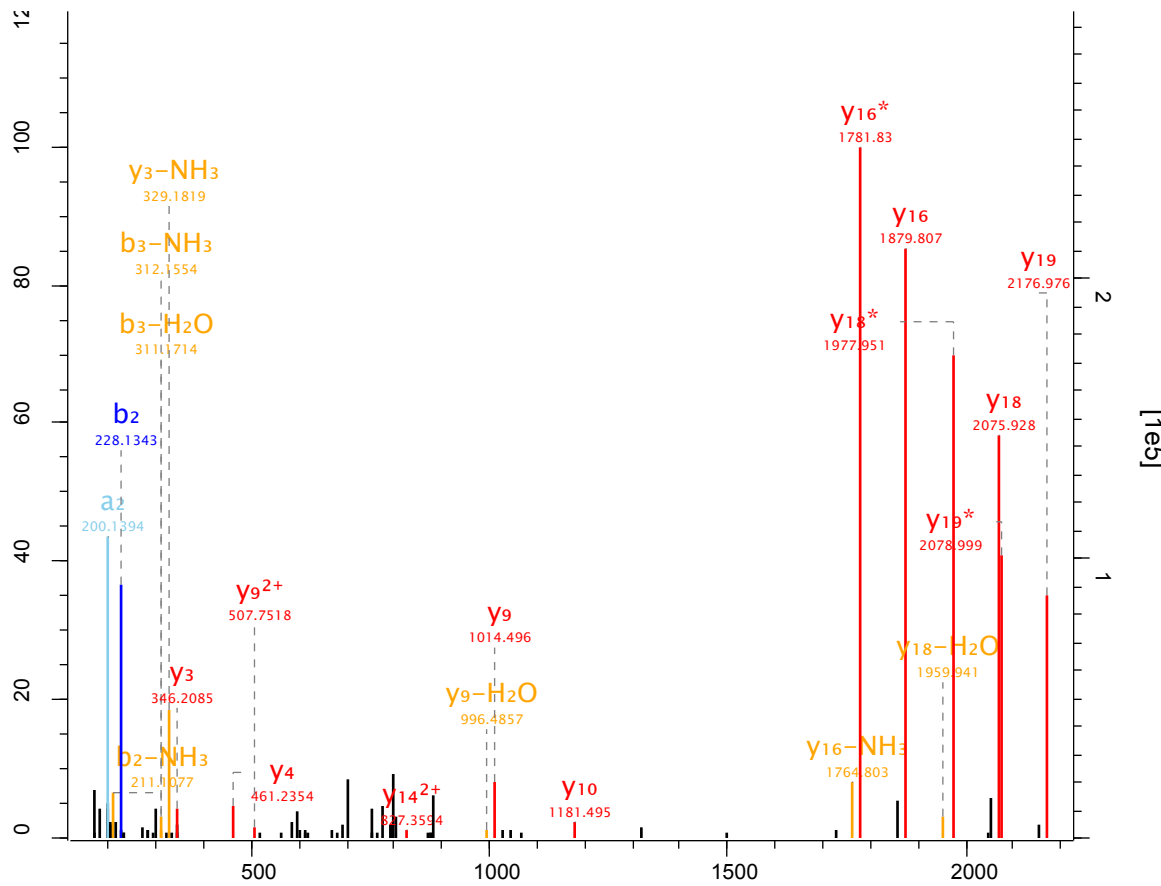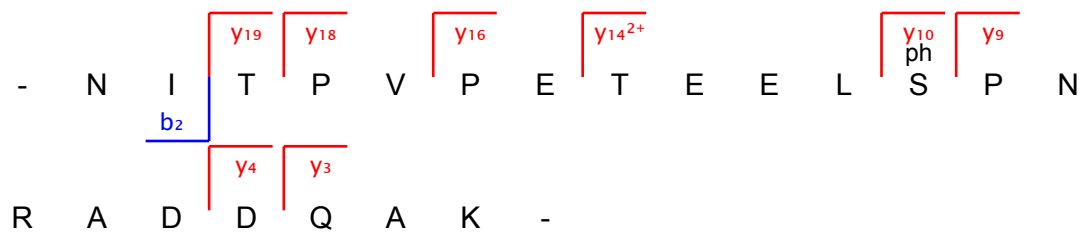

Raw file Scan Method Score m/z  
 Recip\_2\_34\_38 16233 FTMS; HCD 102.98 930.37

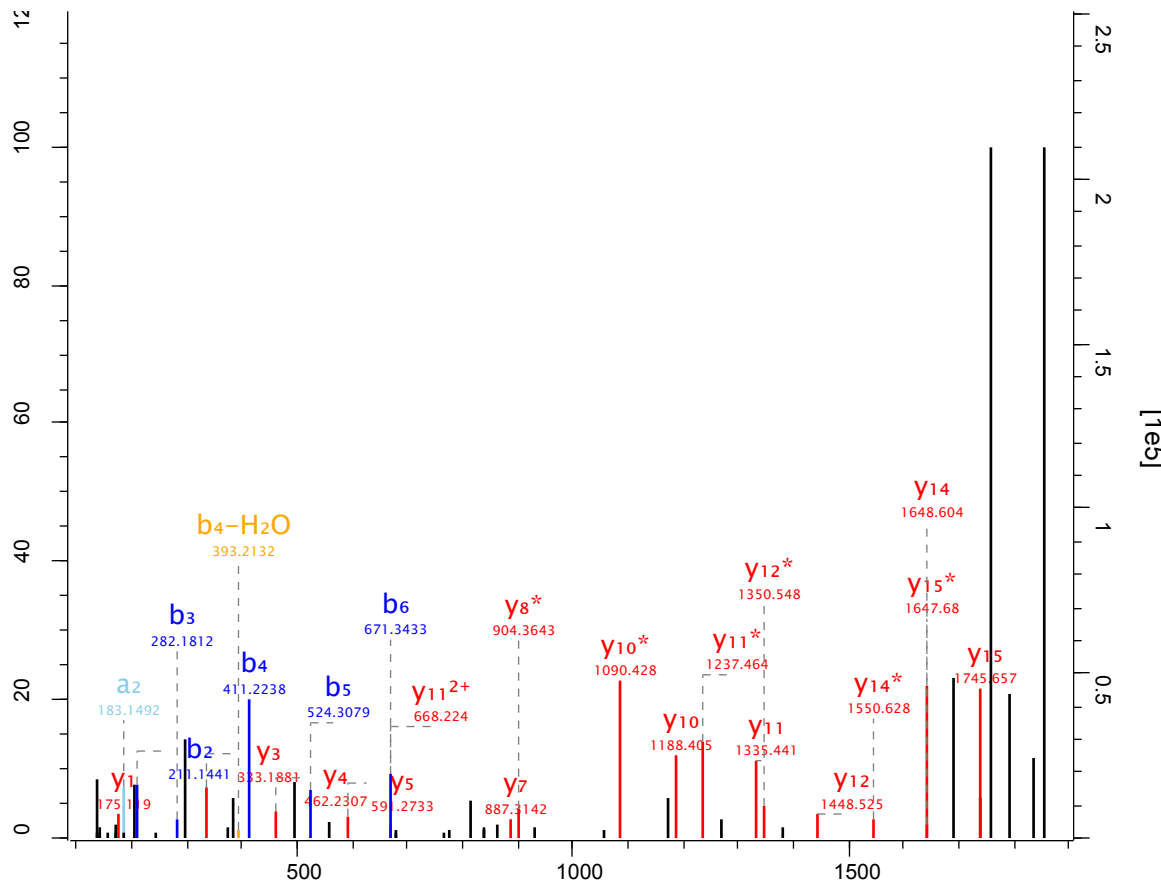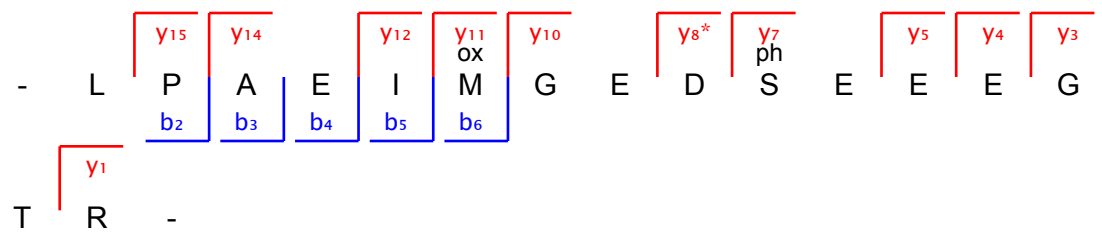

Raw file Scan Method Score m/z  
 Recip\_2\_34\_38 16456 FTMS; HCD 60.55 720.8

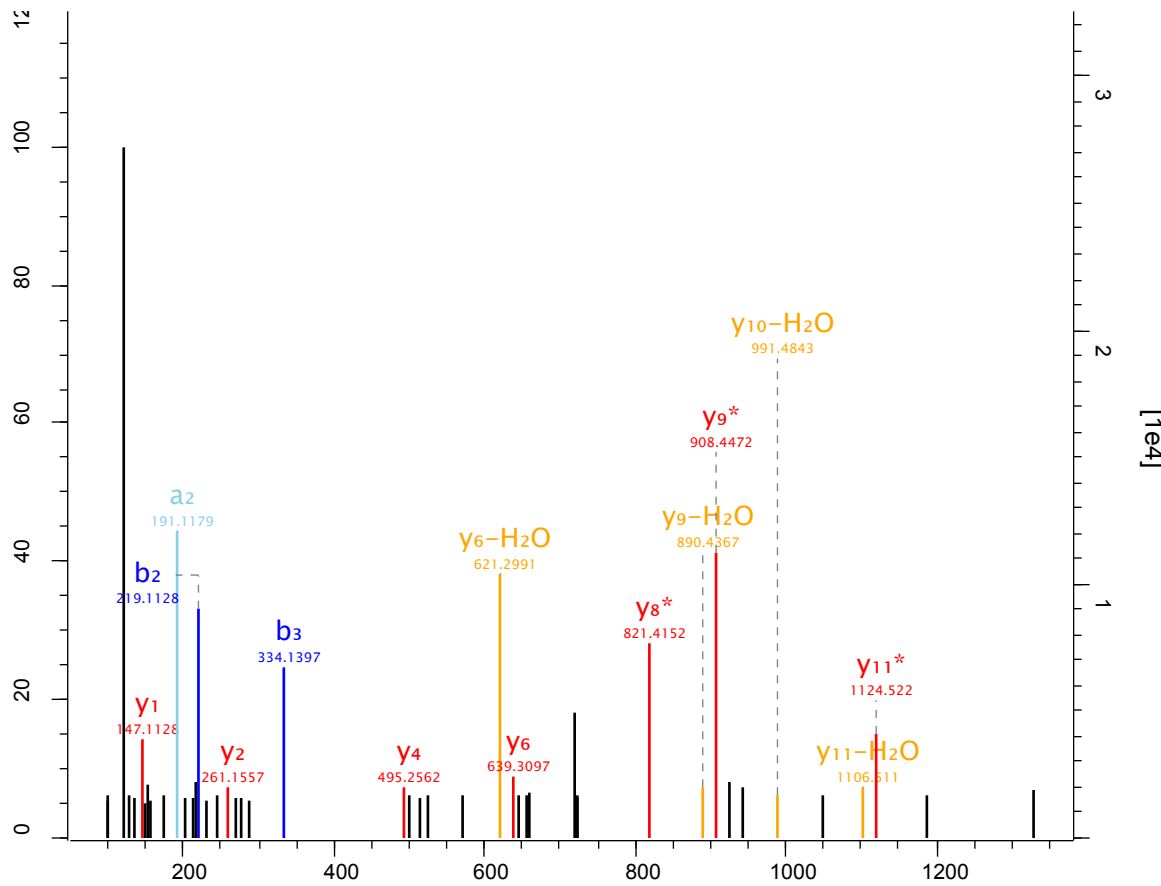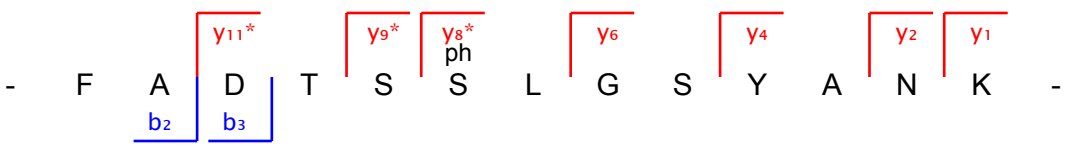

Raw file Scan Method Score m/z  
 Recip\_2\_34\_38 1646 FTMS; HCD 69.92 418.19

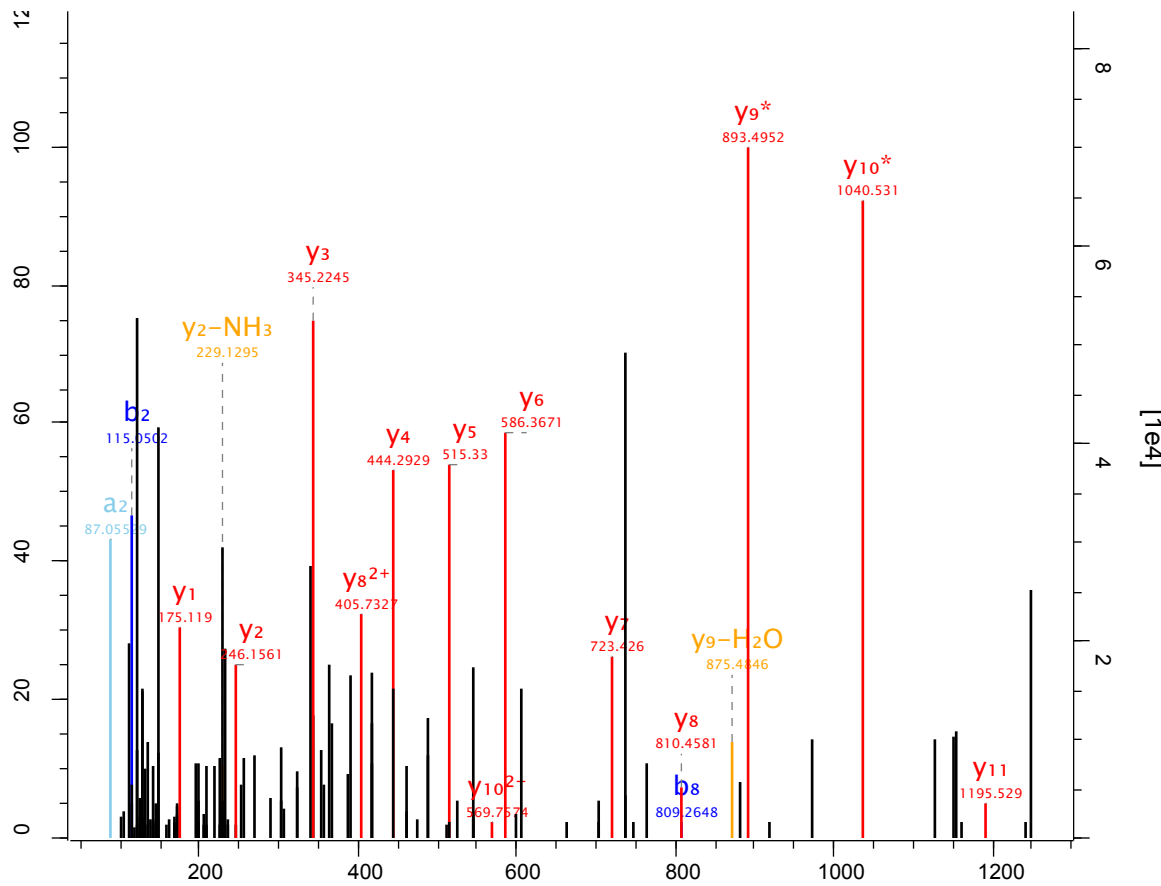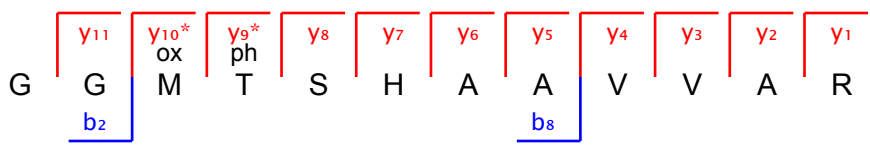

Raw file Scan Method Score m/z  
 Recip\_2\_34\_38 16544 FTMS; HCD 126.04 977.92

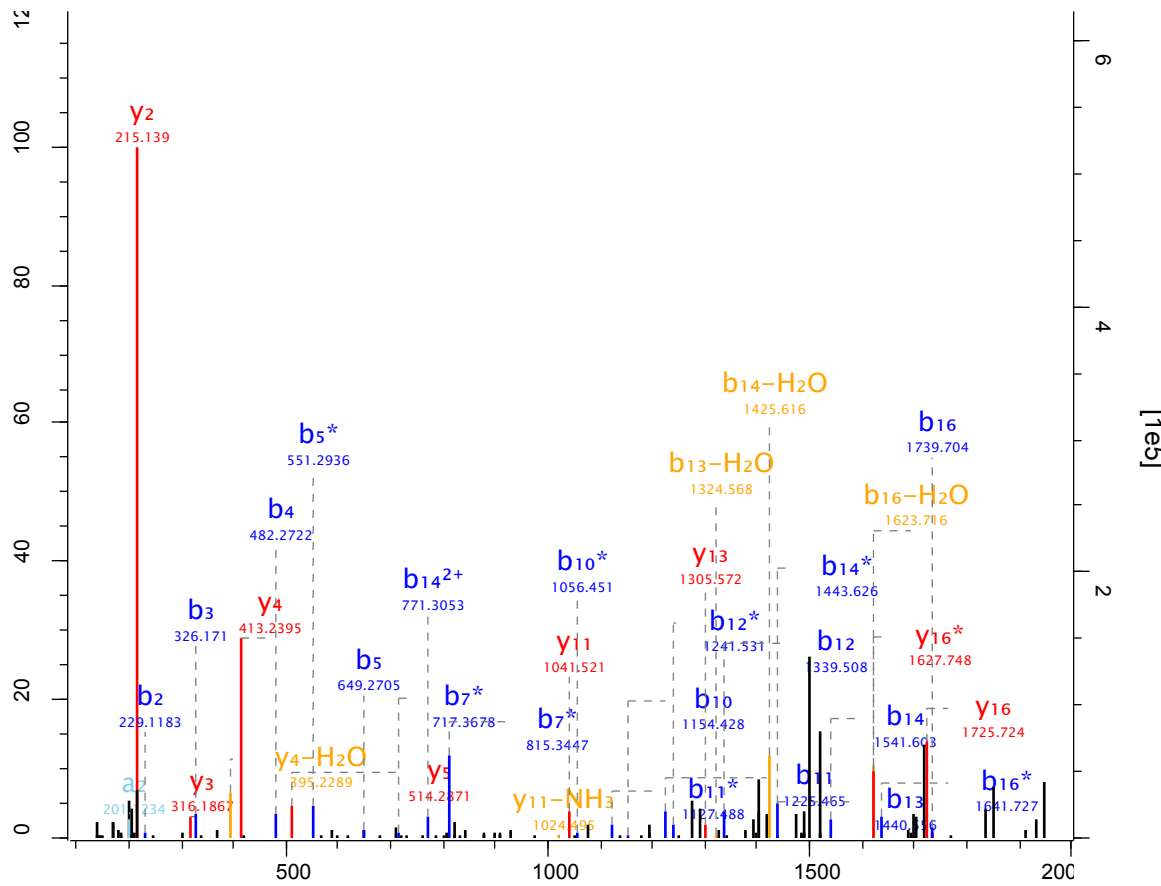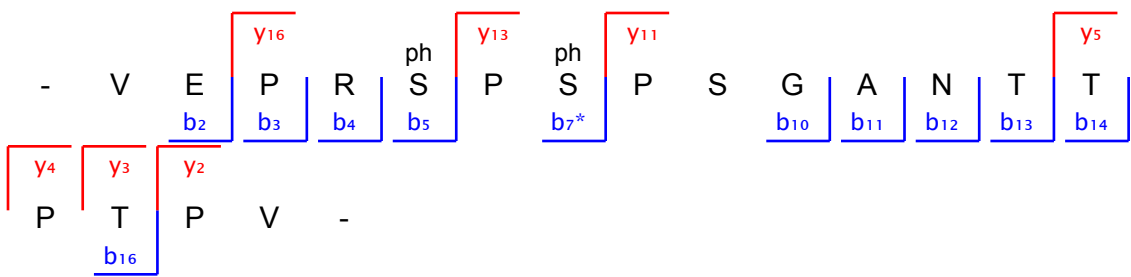

Raw file Scan Method Score m/z  
 Recip\_2\_34\_38 16719 FTMS; HCD 185.28 778.85

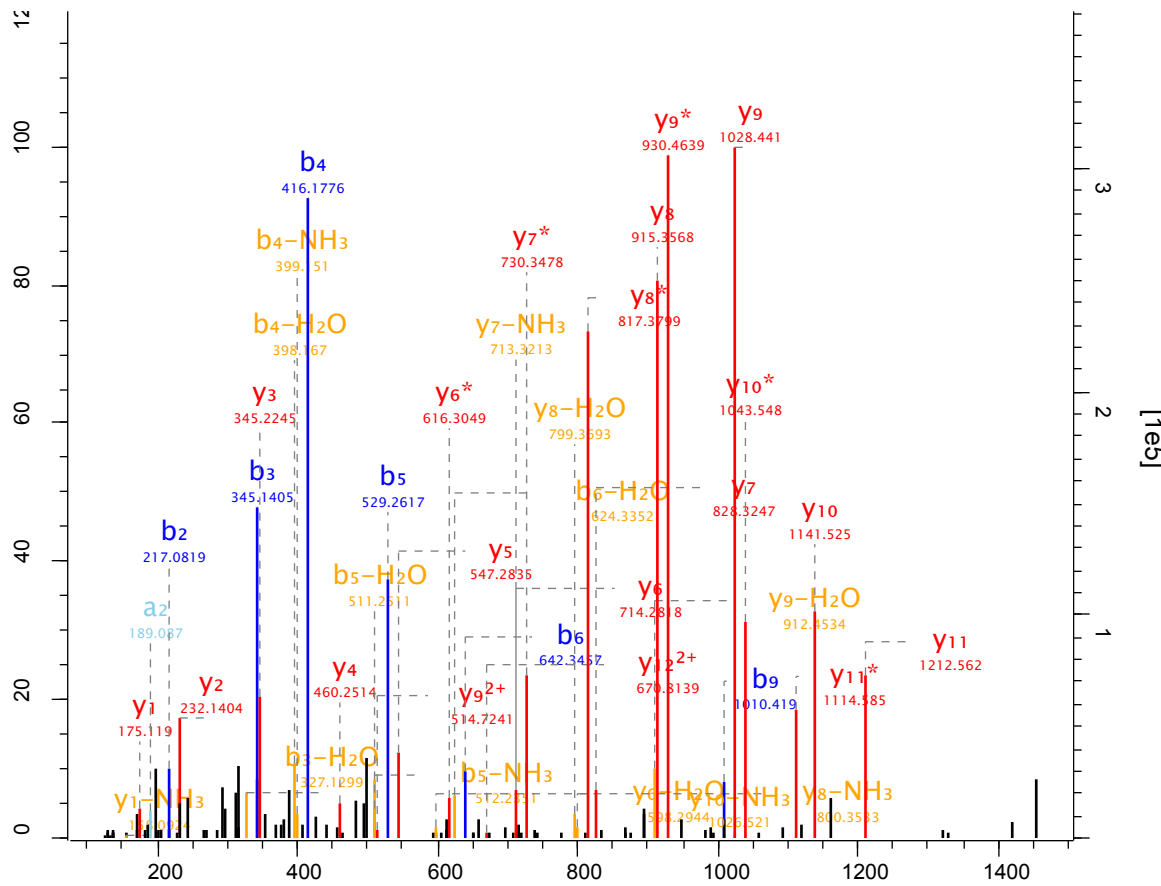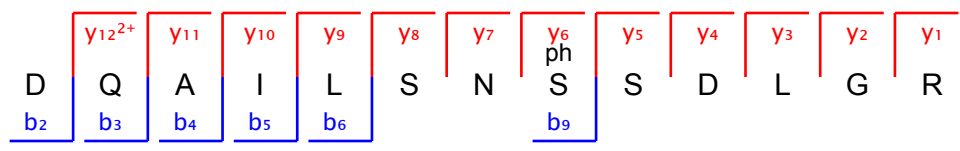

Raw file Scan Method Score m/z  
 Recip\_2\_34\_38 1687 FTMS; HCD 180.02 524.23

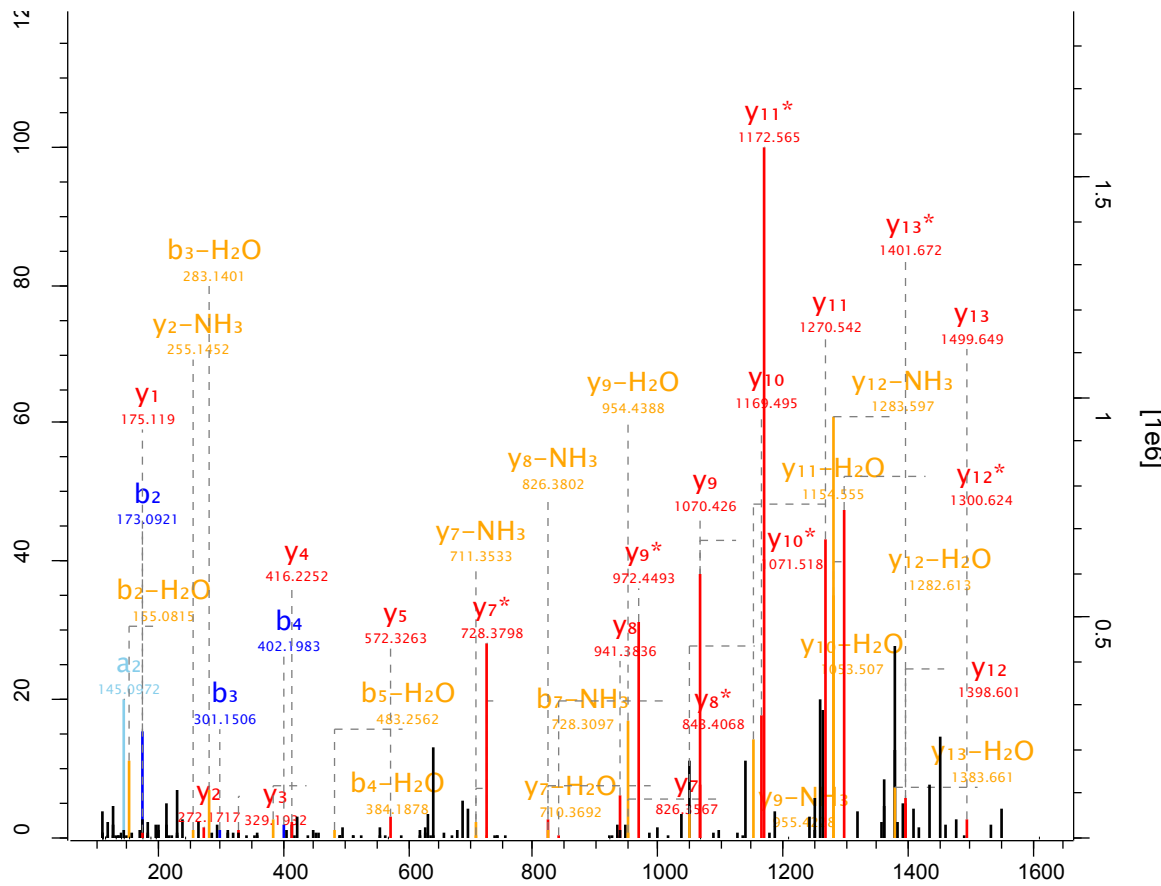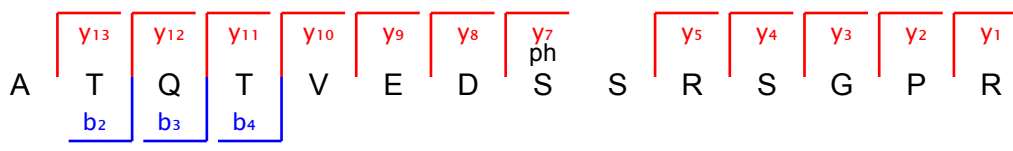

Raw file Scan Method Score m/z  
 Recip\_2\_34\_38 17110 FTMS; HCD 42.96 693.33

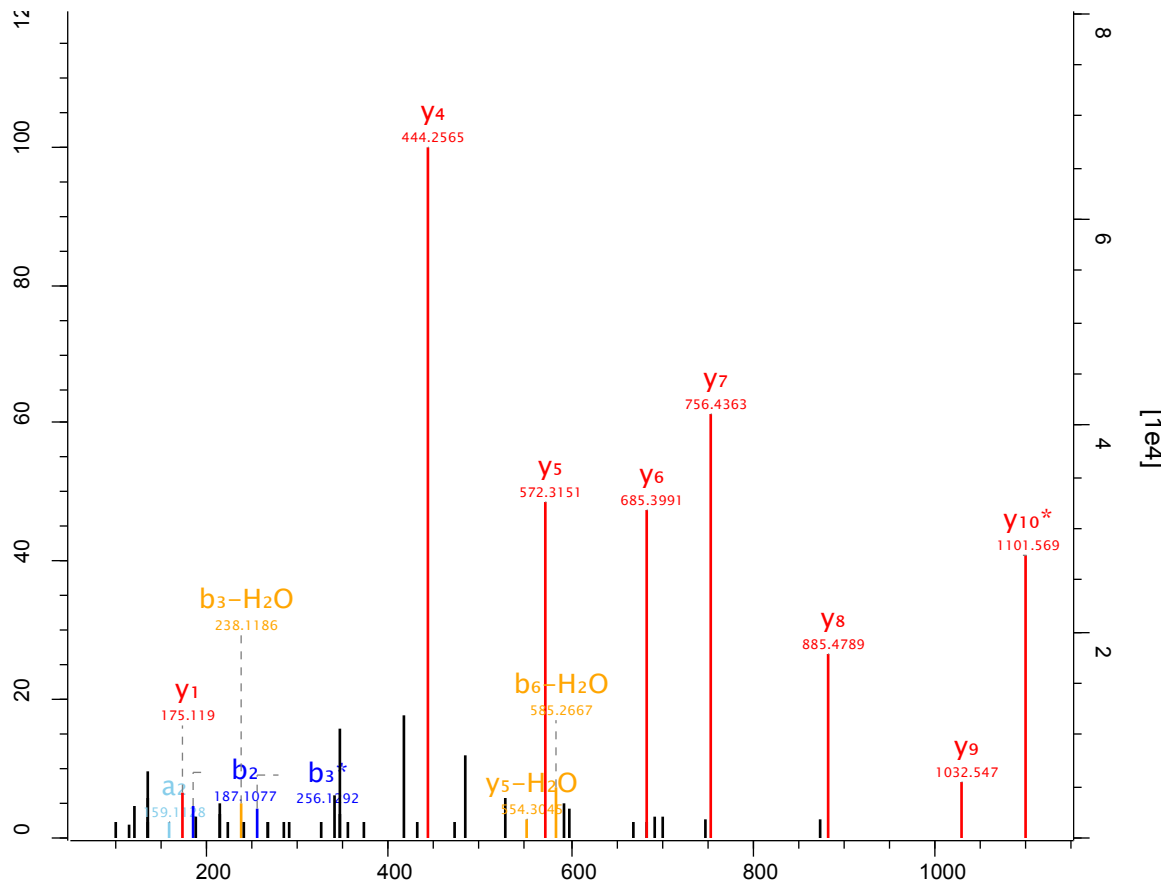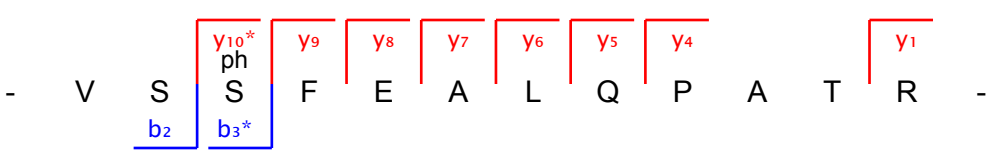



| Raw file      | Scan  | Method    | Score | m/z    |
|---------------|-------|-----------|-------|--------|
| Recip_2_34_38 | 17134 | FTMS; HCD | 83.69 | 493.55 |

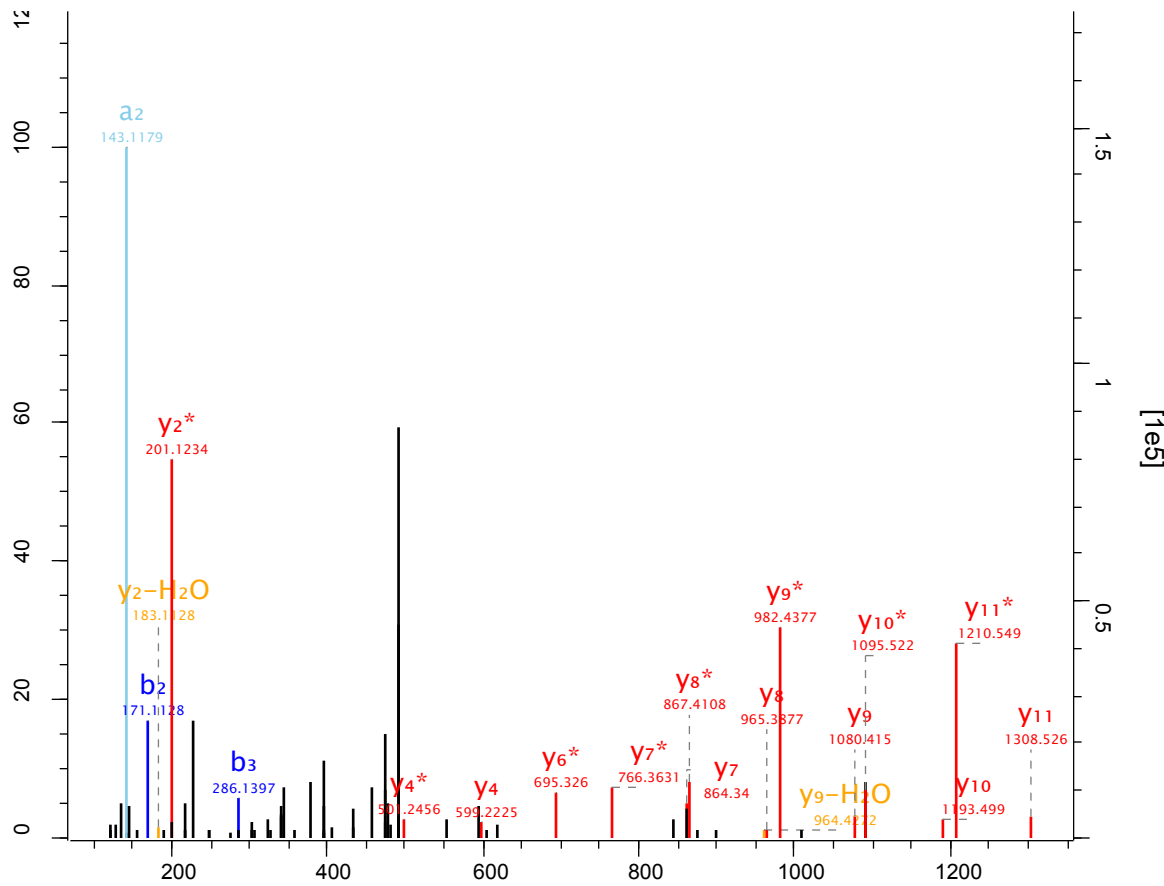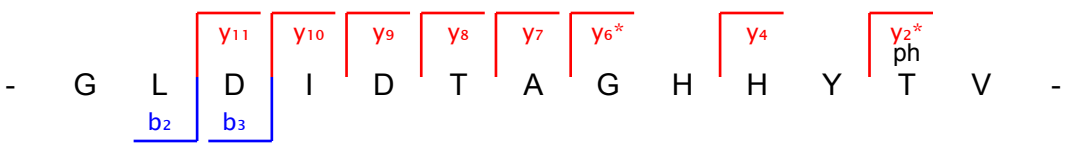

Raw file Scan Method Score m/z  
 Recip\_2\_34\_38 17290 FTMS; HCD 47.71 685.81

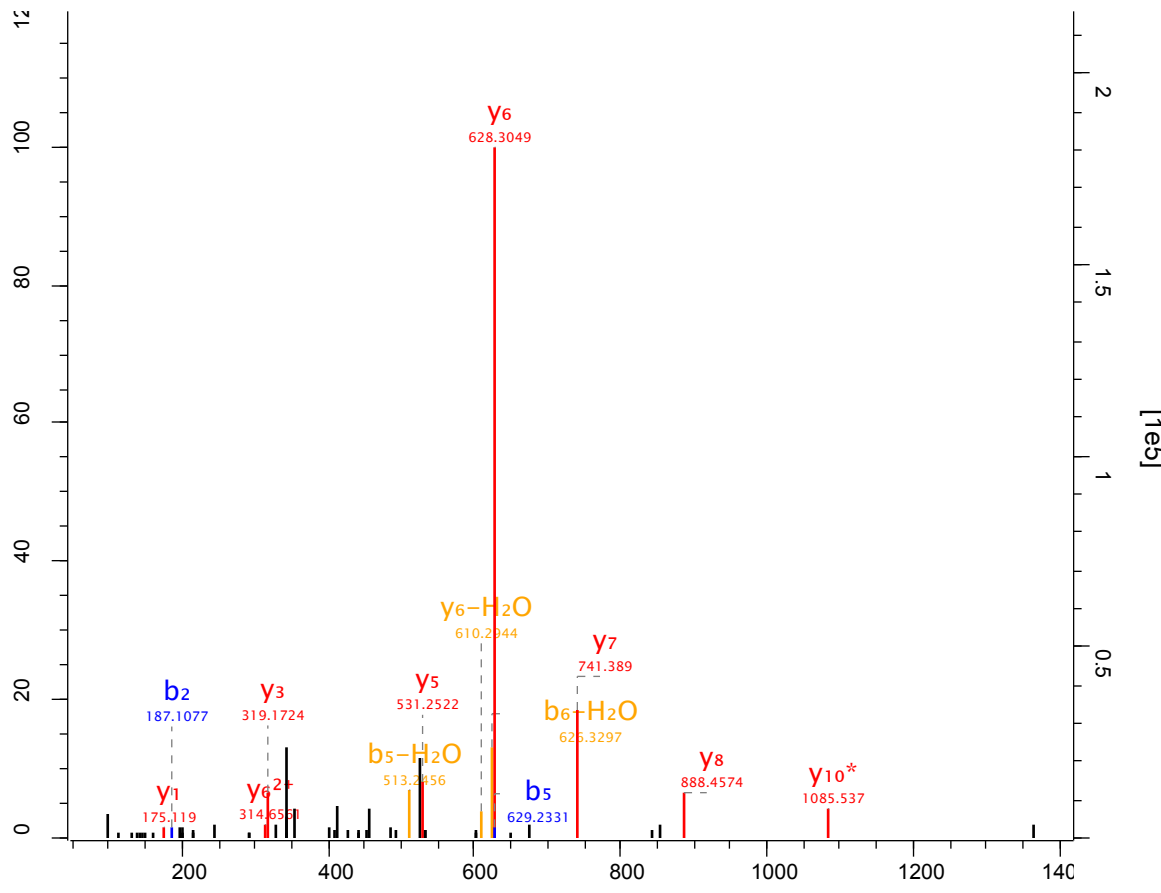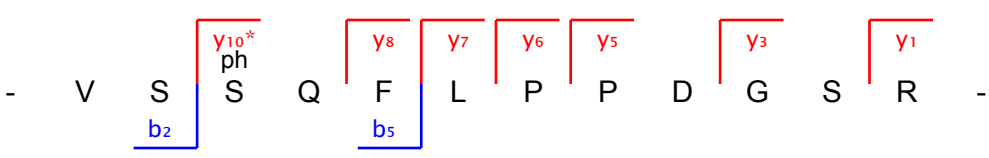

Raw file Scan Method Score m/z  
 Recip\_2\_34\_38 1752 FTMS; HCD 148.52 587.24

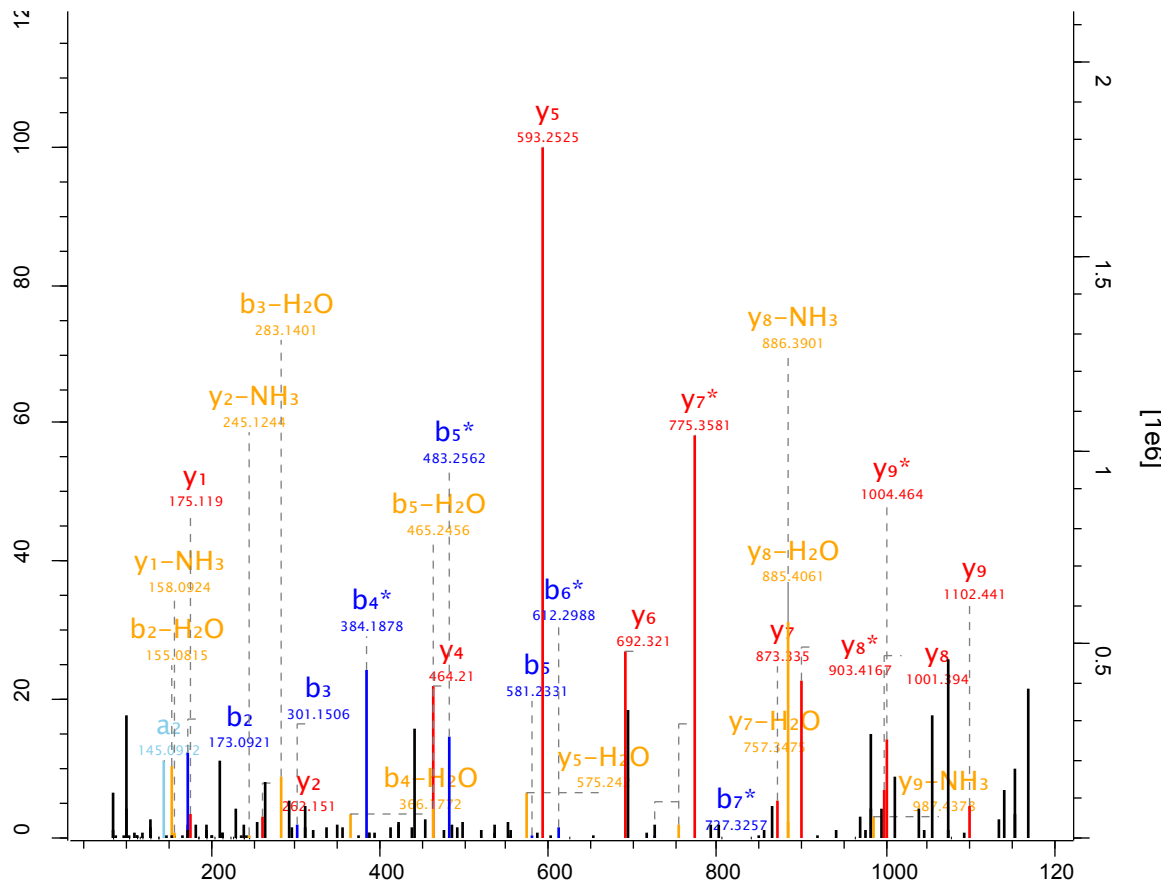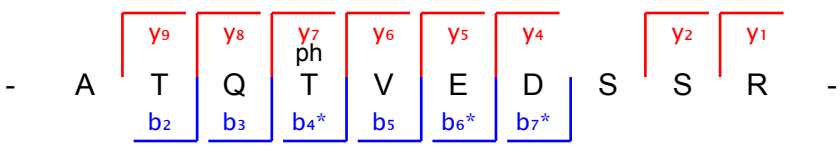

| Raw file      | Scan | Method    | Score | m/z    |
|---------------|------|-----------|-------|--------|
| Recip_2_34_38 | 1768 | FTMS; HCD | 41.4  | 461.24 |

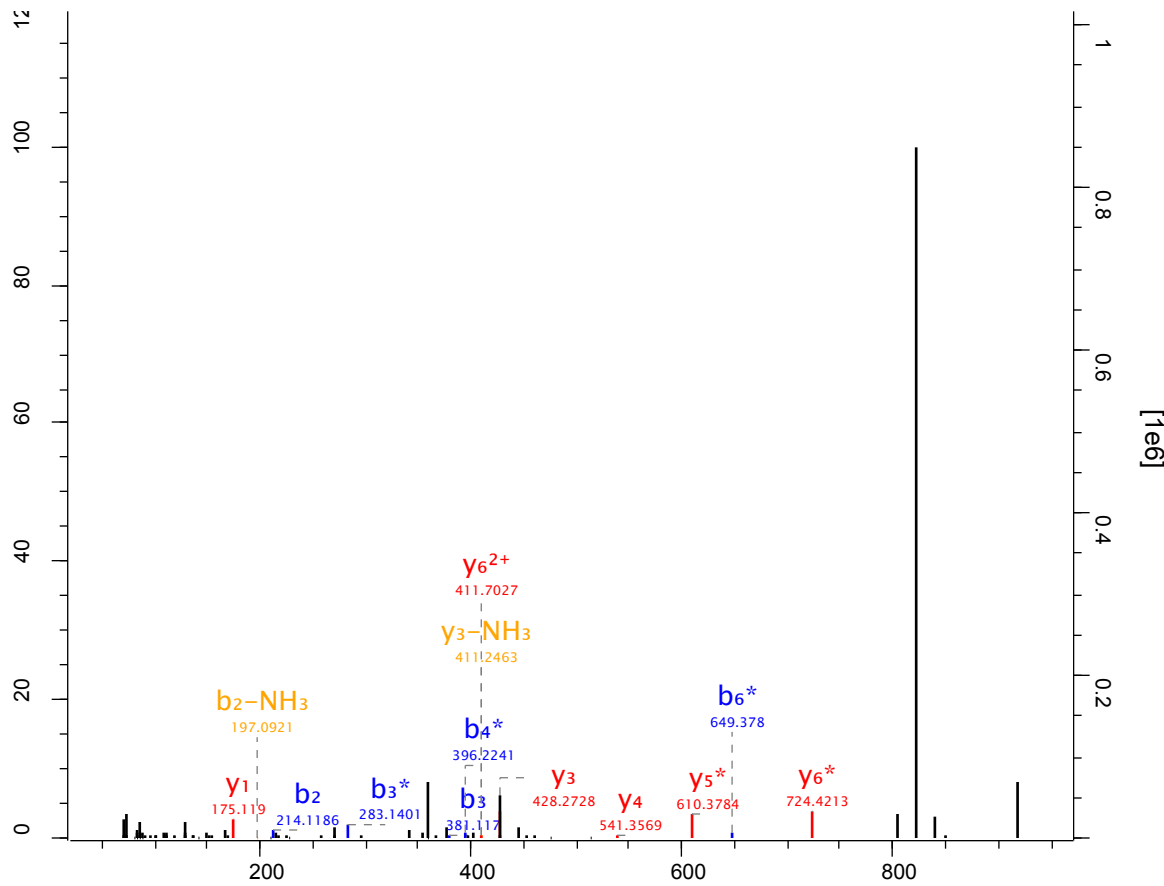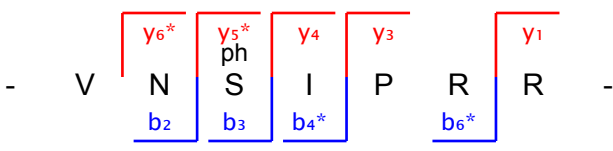

| Raw file      | Scan | Method    | Score | m/z    |
|---------------|------|-----------|-------|--------|
| Recip_2_34_38 | 1775 | FTMS; HCD | 78.9  | 582.73 |

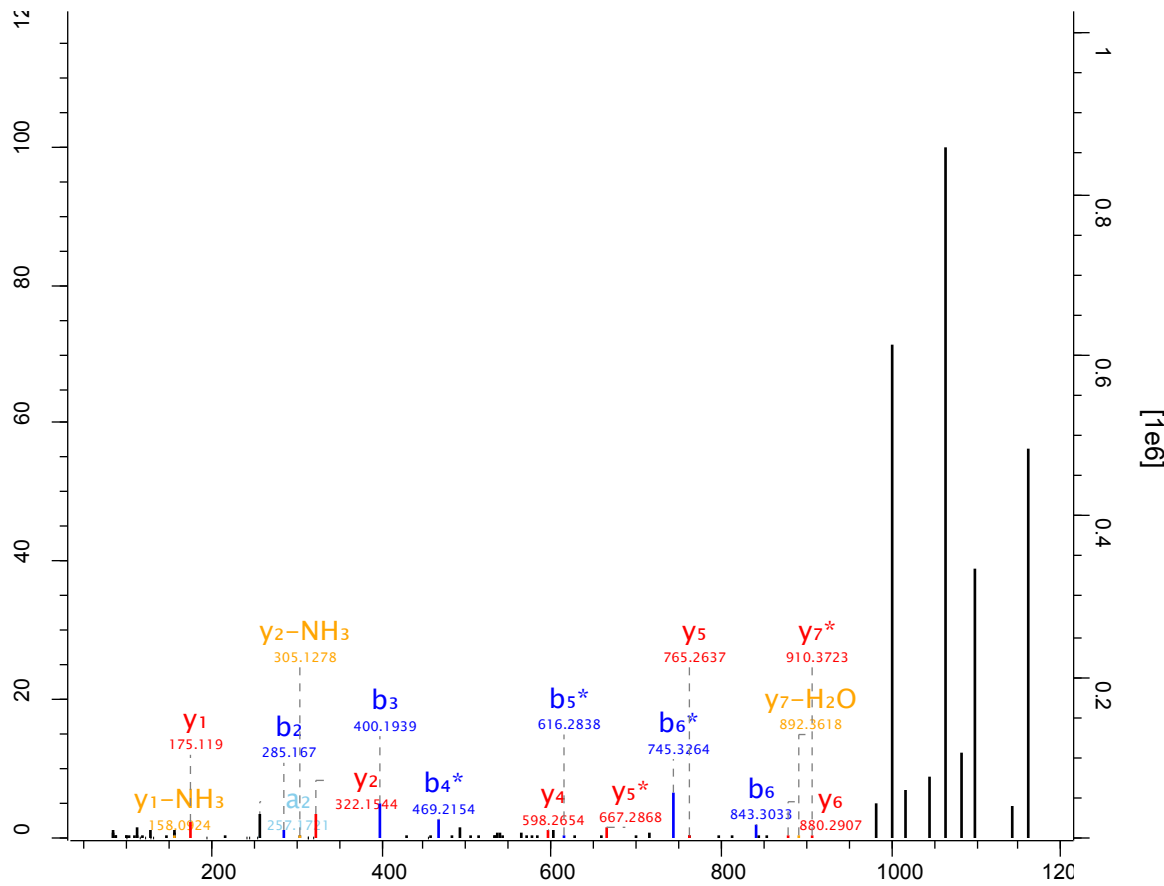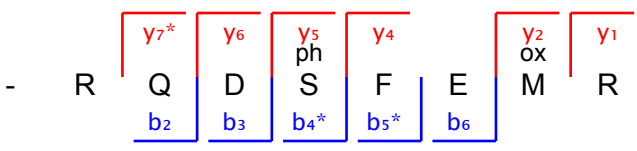

Raw file Scan Method Score m/z  
 Recip\_2\_34\_38 1804 FTMS; HCD 211.17 835.85

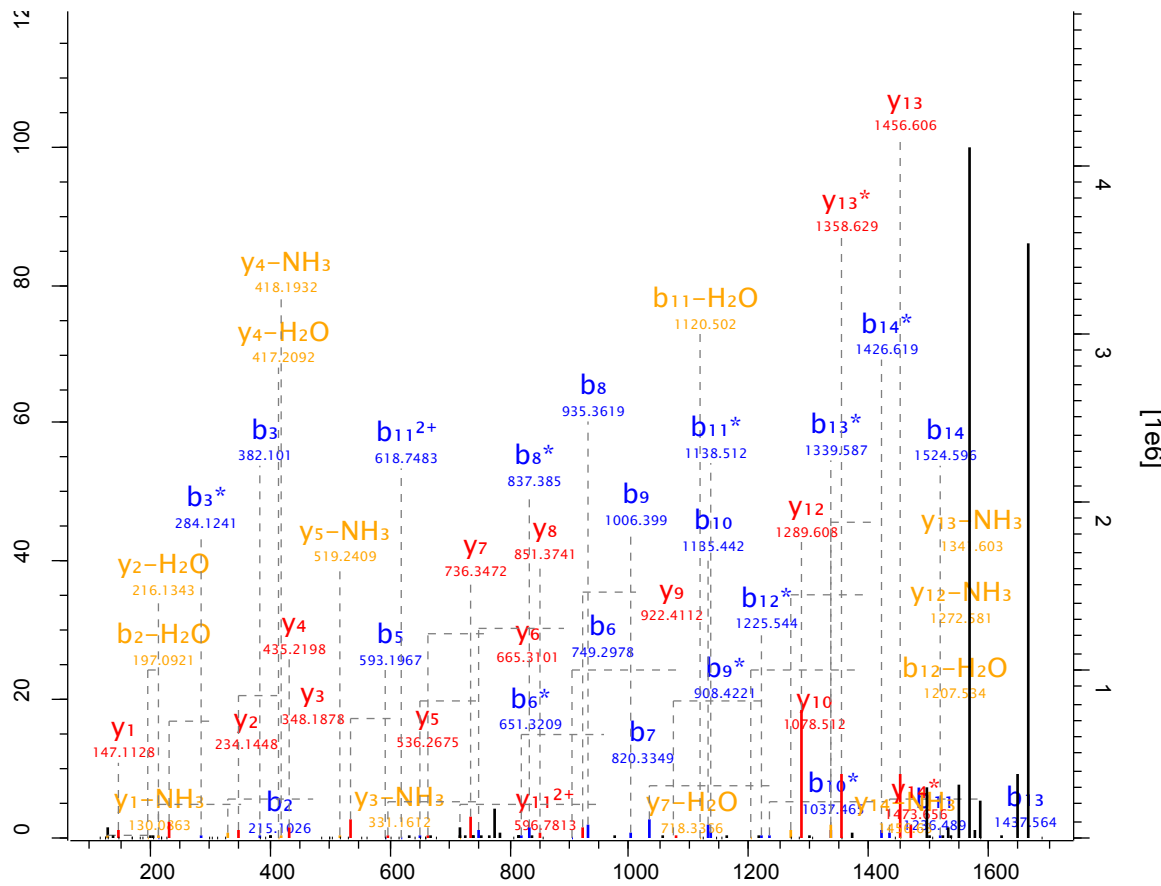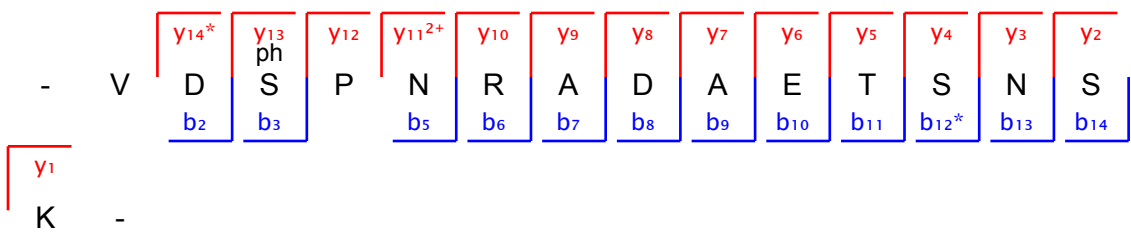

| Raw file      | Scan | Method    | Score | m/z    |
|---------------|------|-----------|-------|--------|
| Recip_2_34_38 | 1814 | FTMS; HCD | 47.62 | 474.19 |

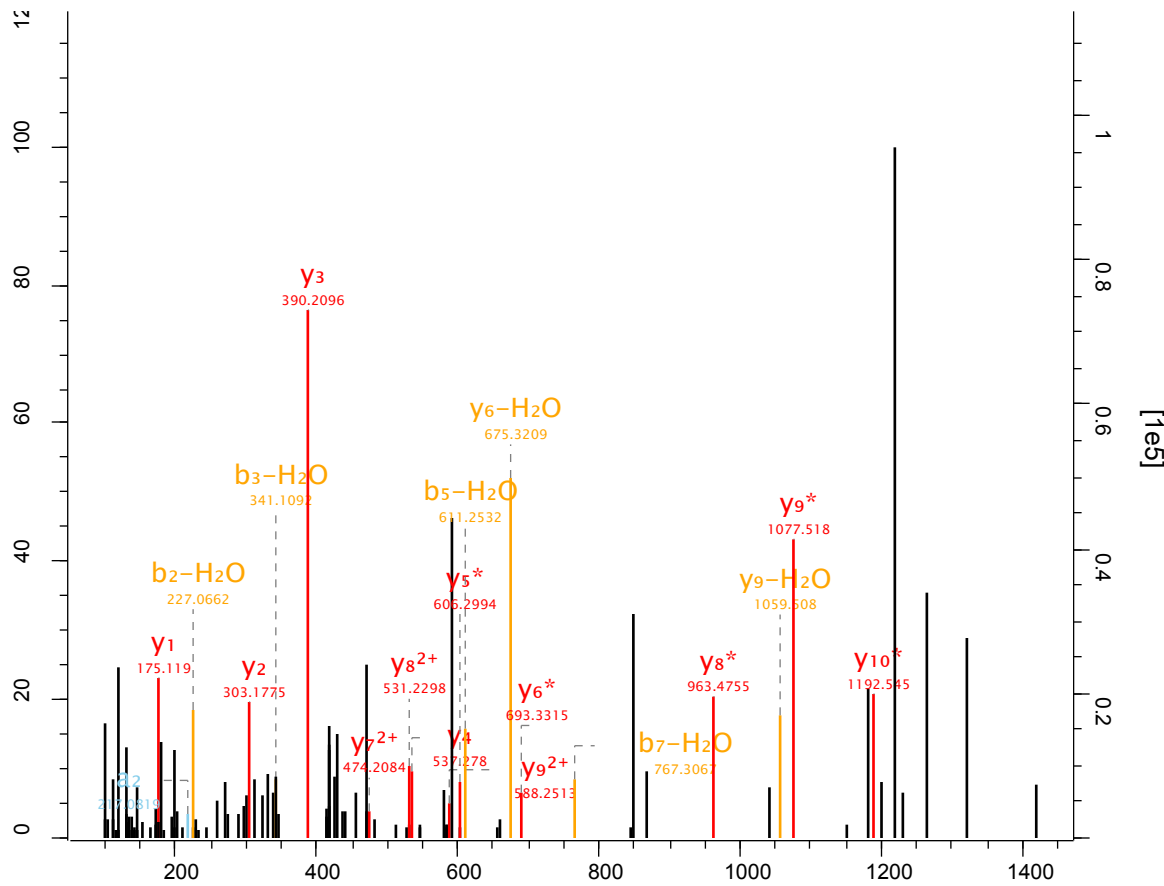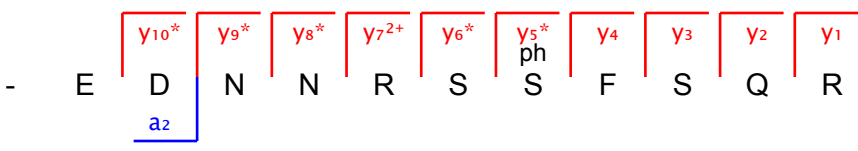

Raw file Scan Method Score m/z  
 Recip\_2\_34\_38 18149 FTMS; HCD 179.56 709.29

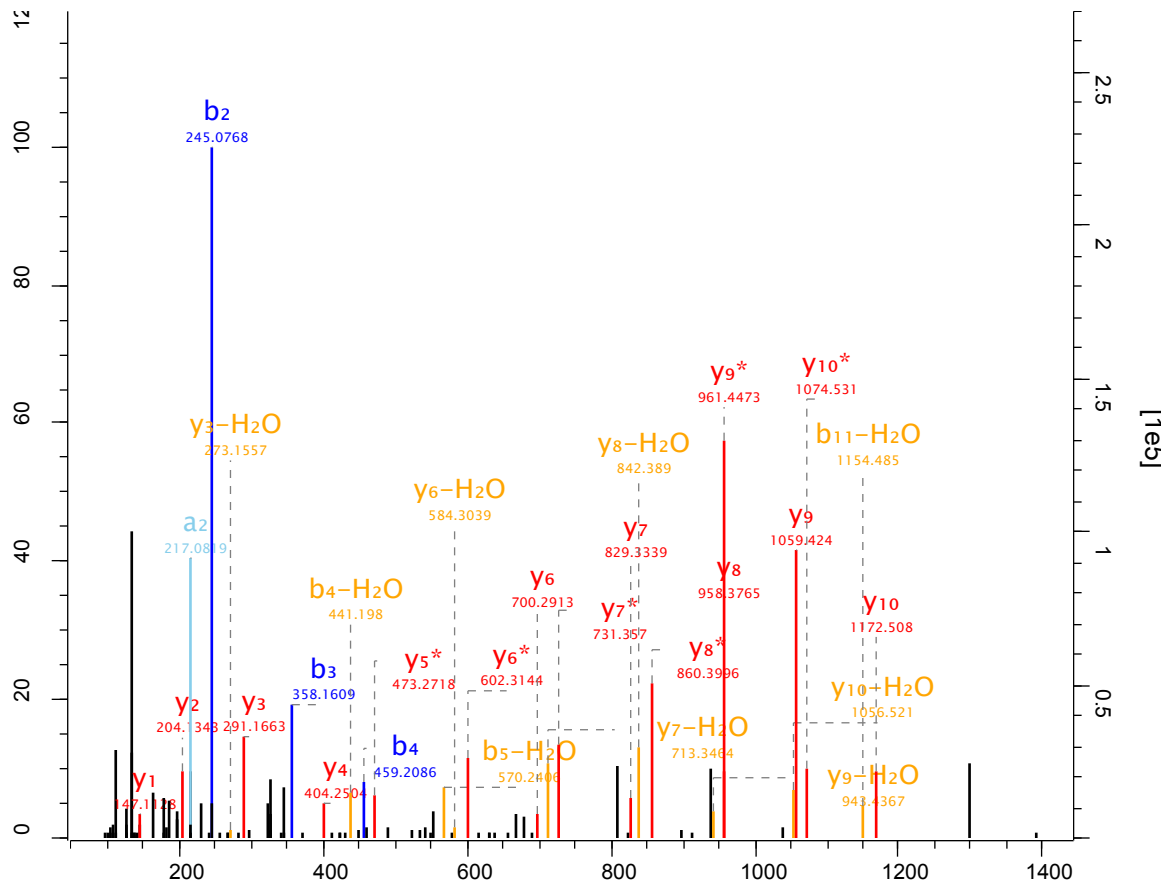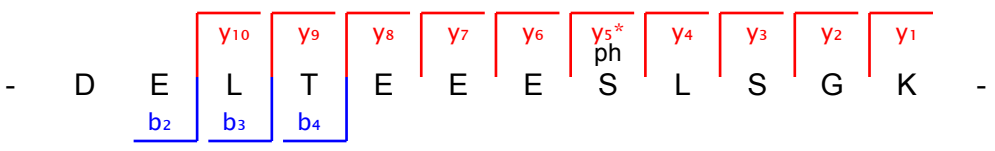



Raw file Scan Method Score m/z  
 Recip\_2\_34\_38 18273 FTMS; HCD 136.08 669.27

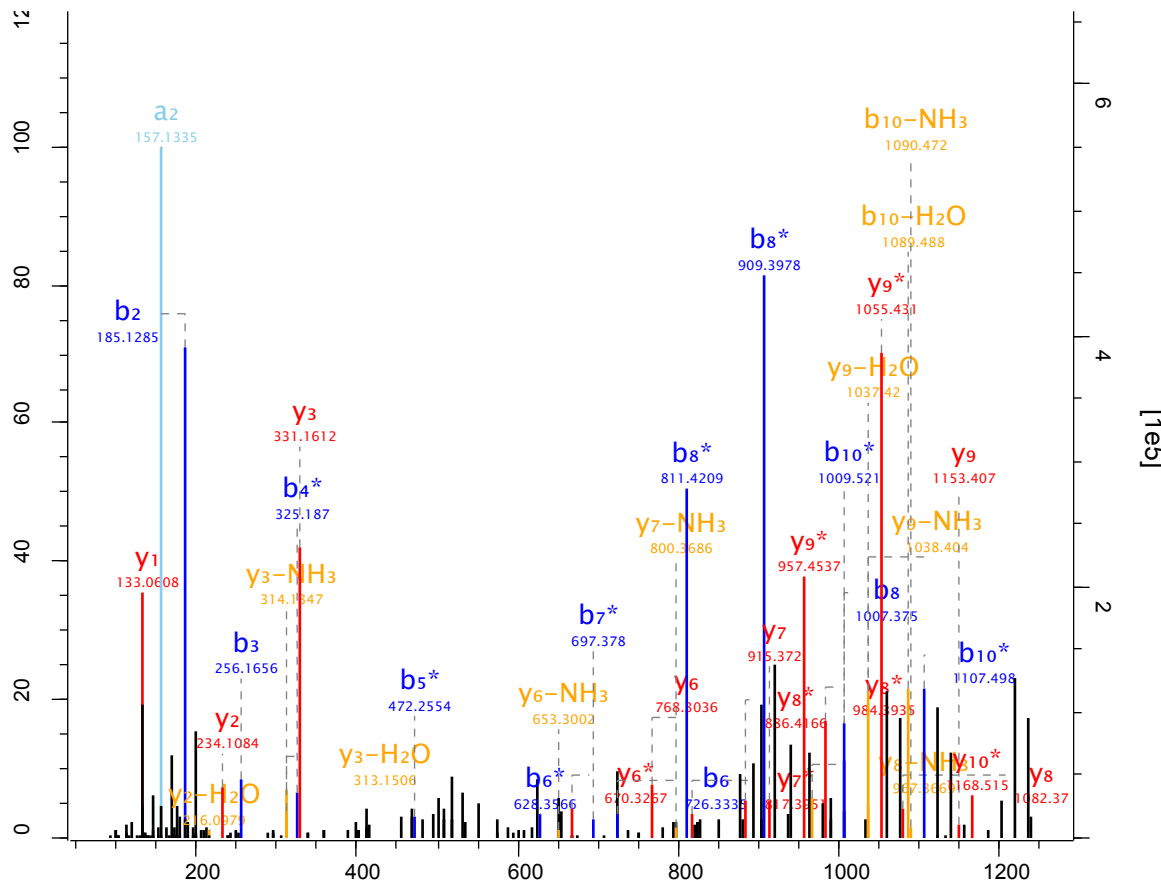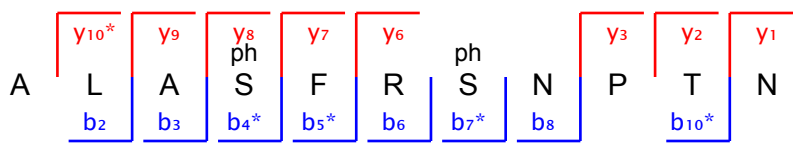

Raw file Scan Method Score m/z  
 Recip\_2\_34\_38 1831 FTMS; HCD 53.3 490.21

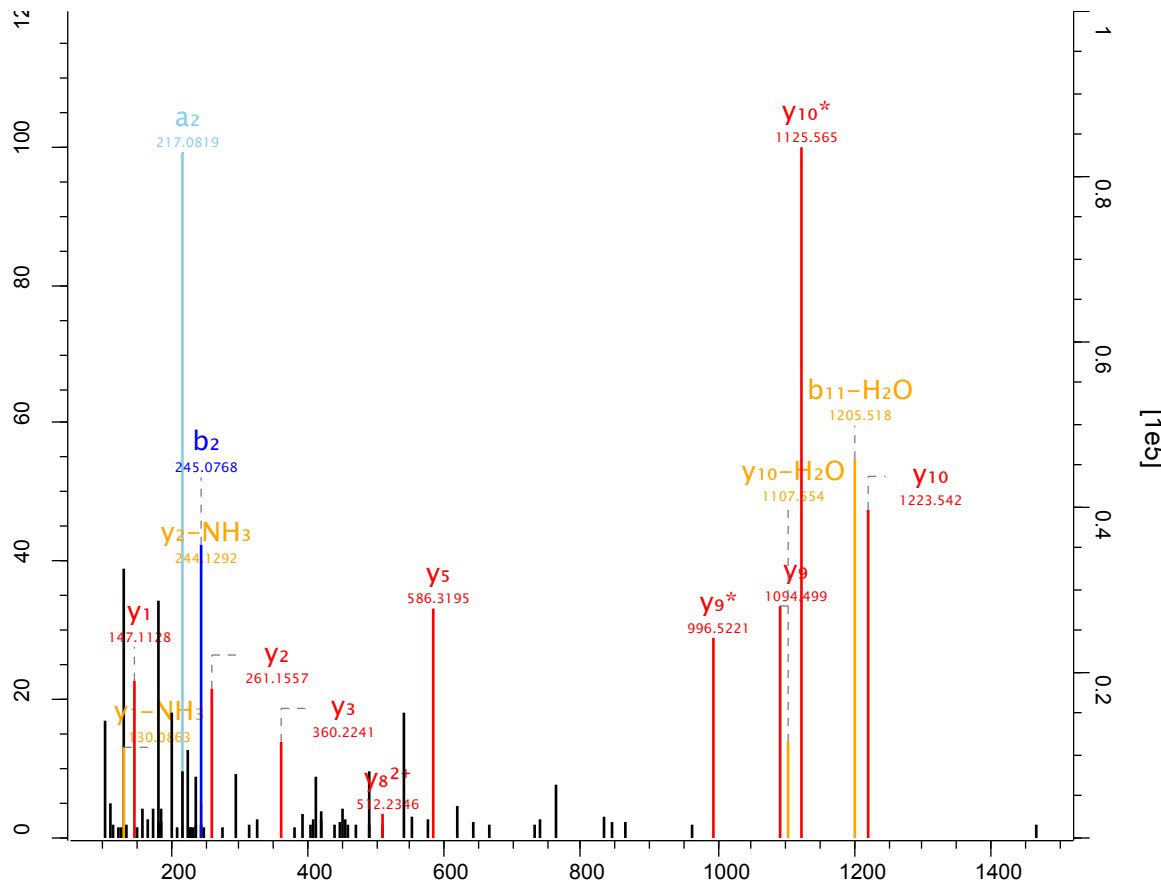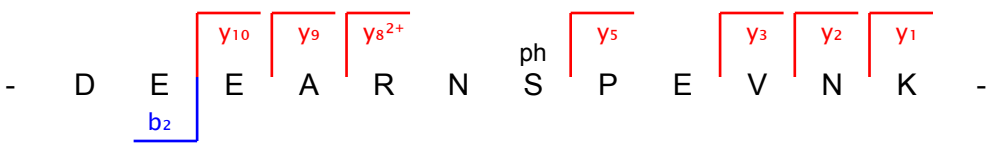

| Raw file      | Scan | Method    | Score | m/z    |
|---------------|------|-----------|-------|--------|
| Recip_2_34_38 | 1834 | FTMS; HCD | 60.44 | 343.15 |

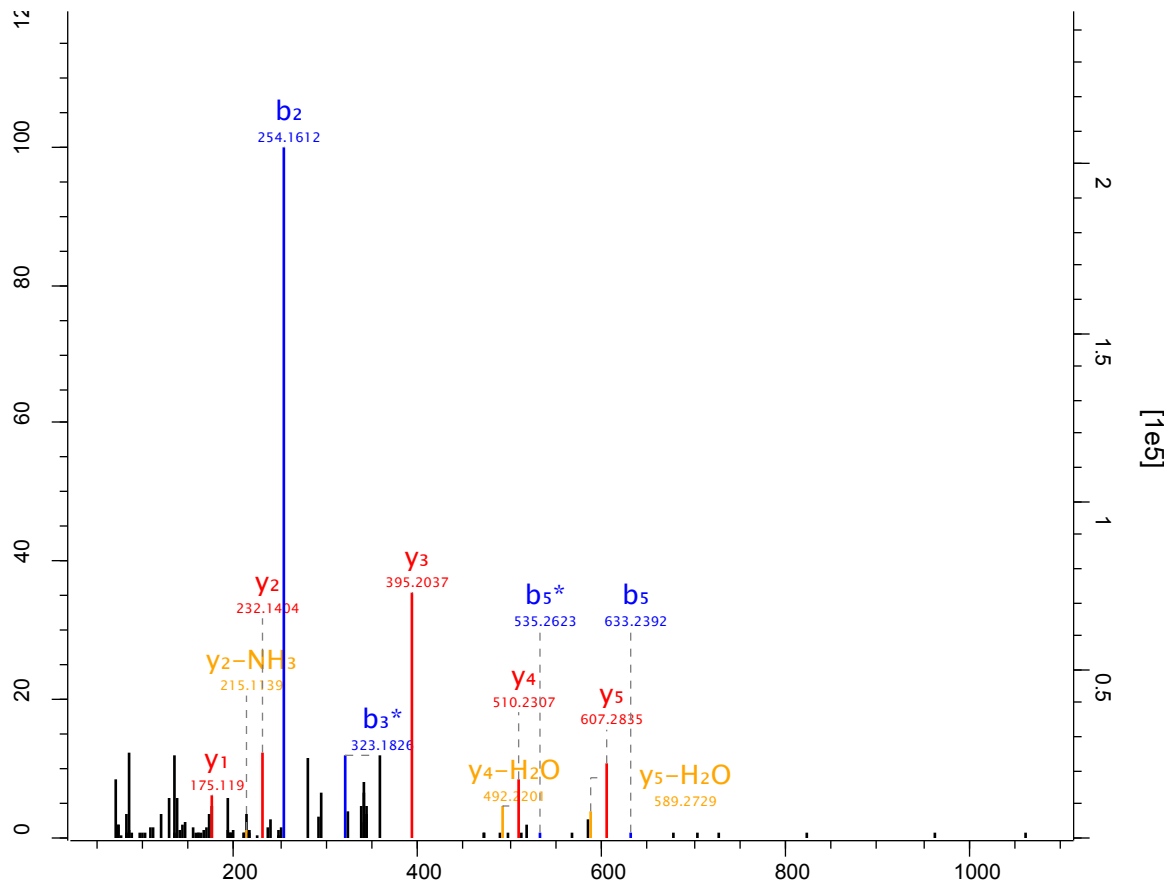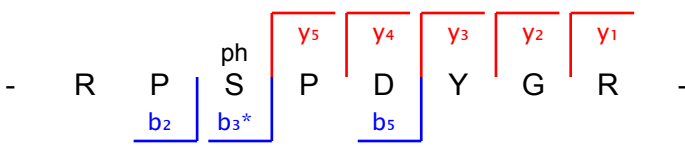

Raw file Scan Method Score m/z  
 Recip\_2\_34\_38 18571 FTMS; HCD 106.99 734.36

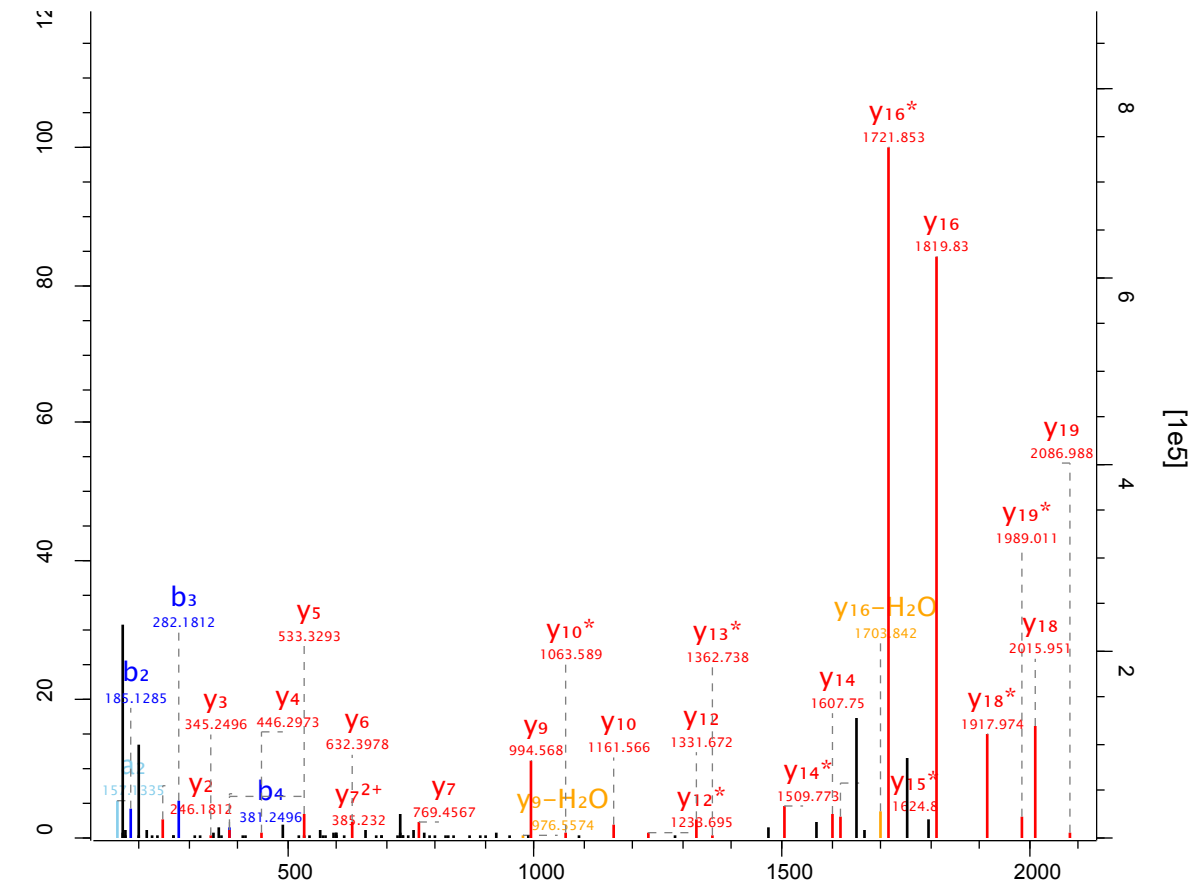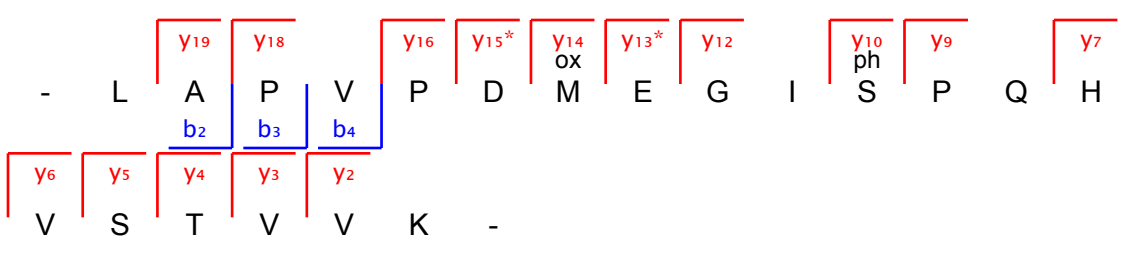

Raw file Scan Method Score m/z  
 Recip\_2\_34\_38 18756 FTMS; HCD 87.68 575.24

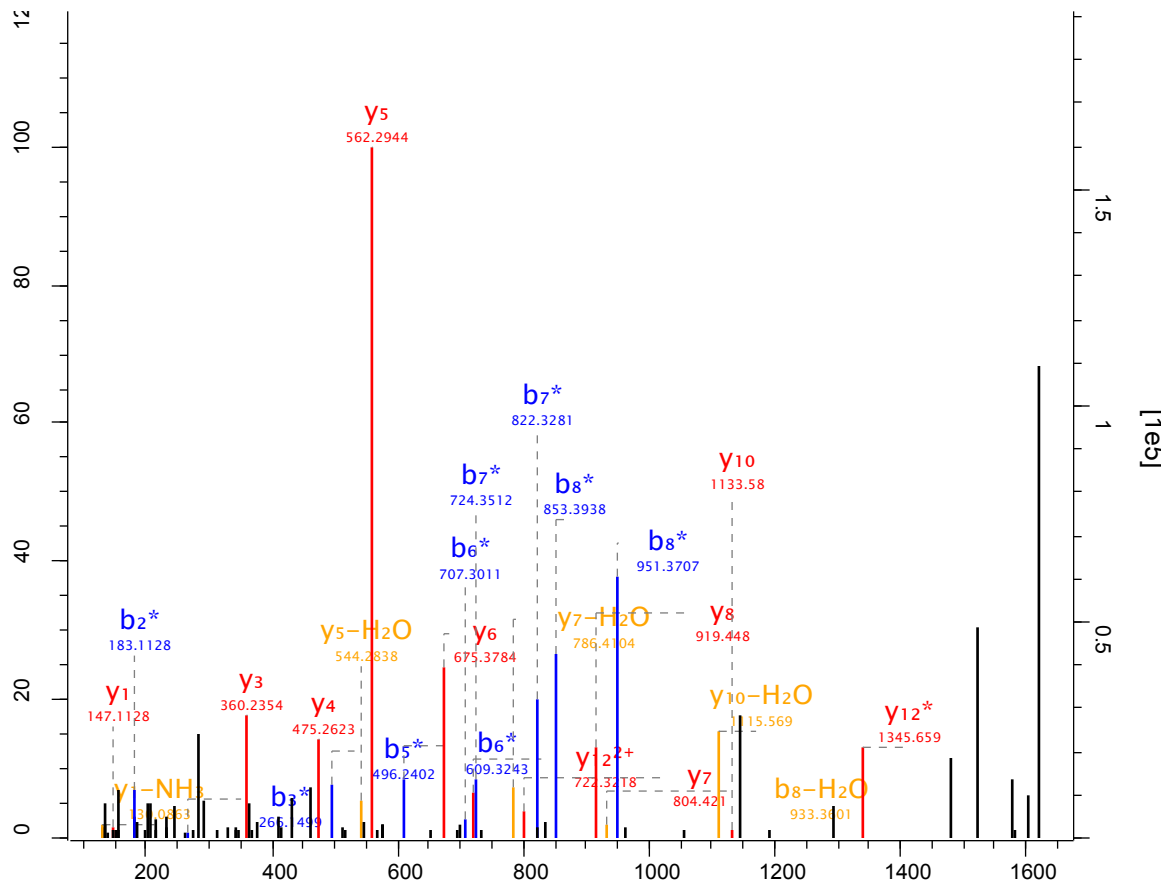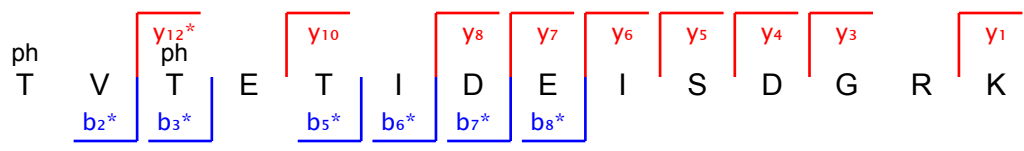

Raw file Scan Method Score m/z  
 Recip\_2\_34\_38 18838 FTMS; HCD 58.95 765.34

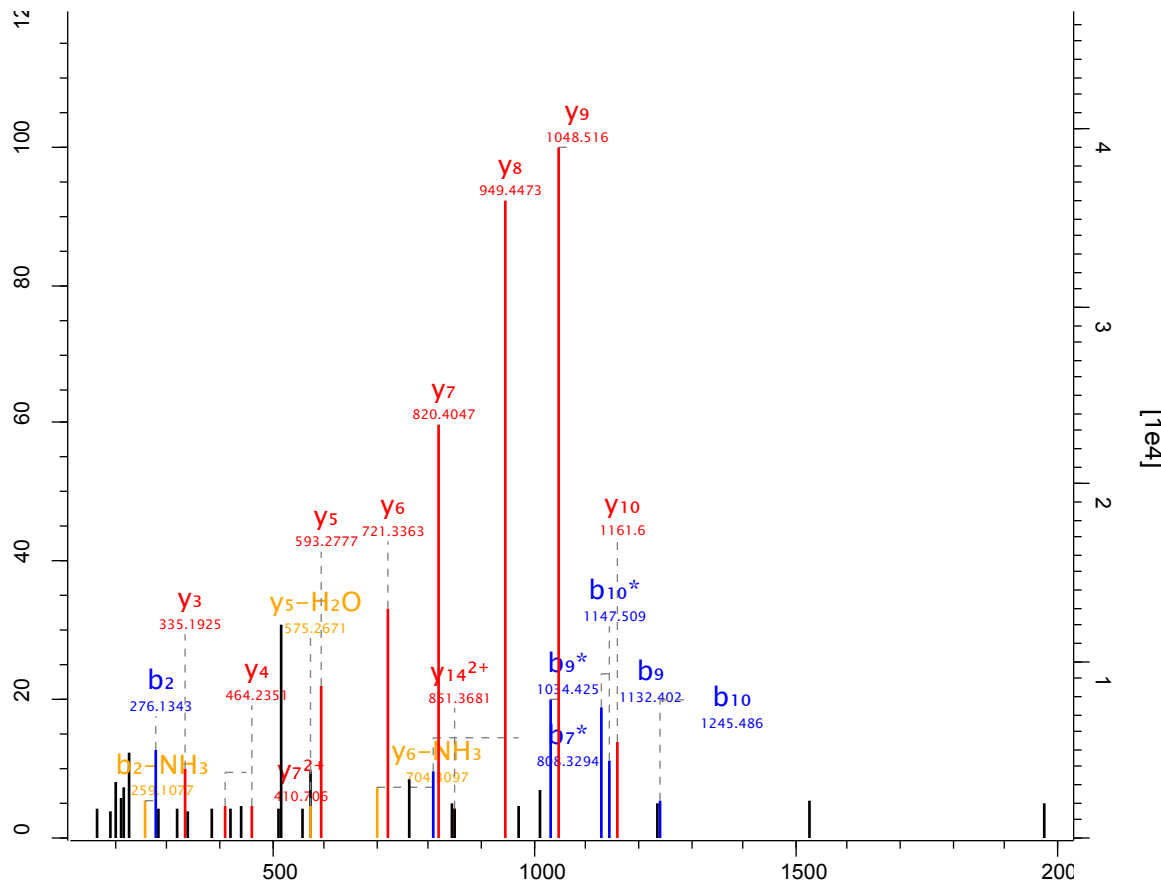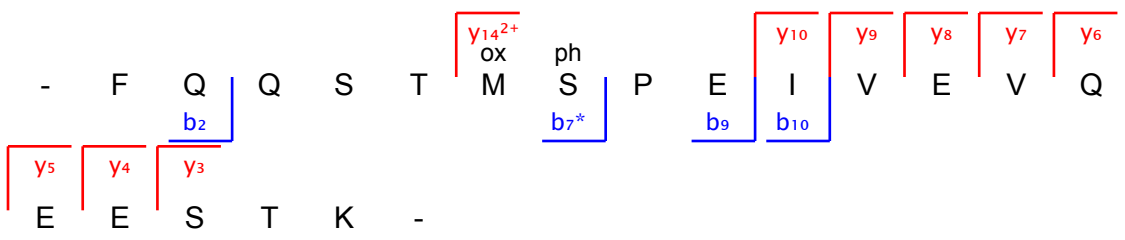

Raw file Scan Method Score m/z  
 Recip\_2\_34\_38 19020 FTMS; HCD 61.49 863.77

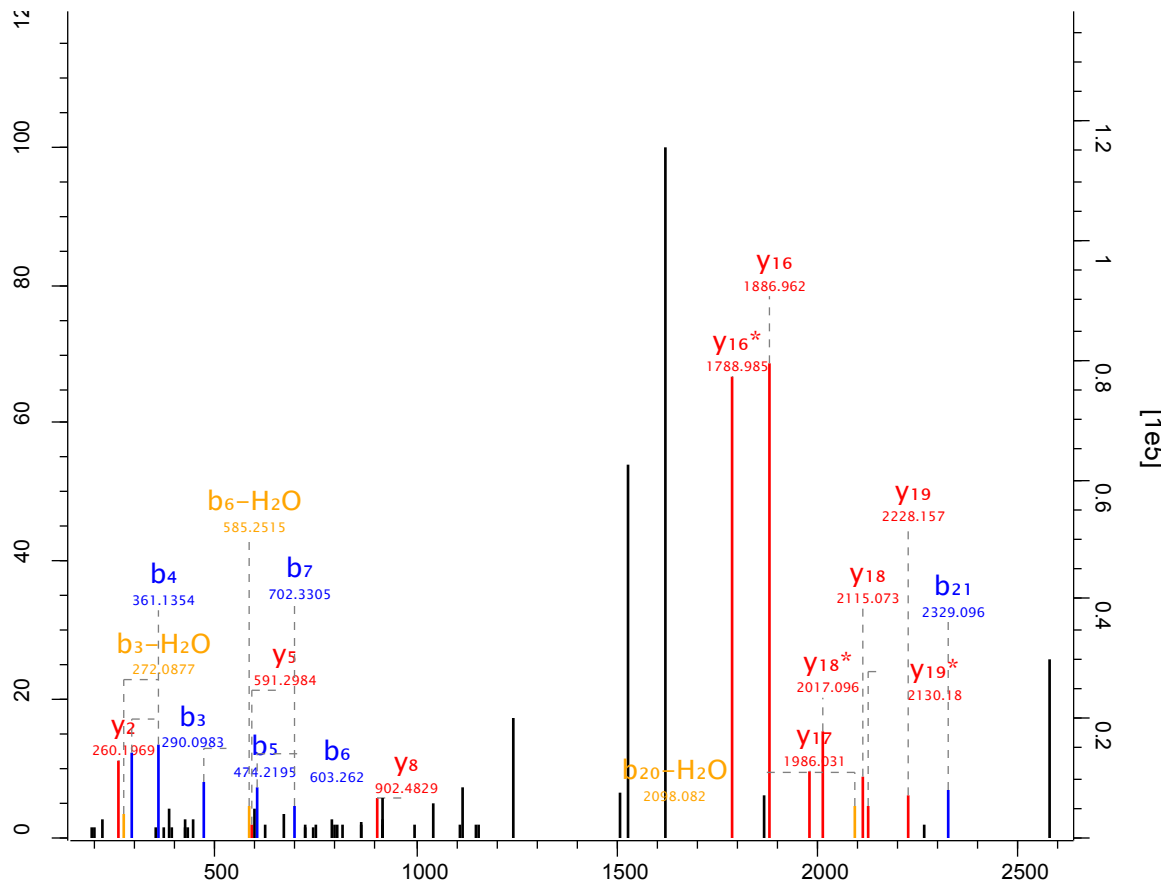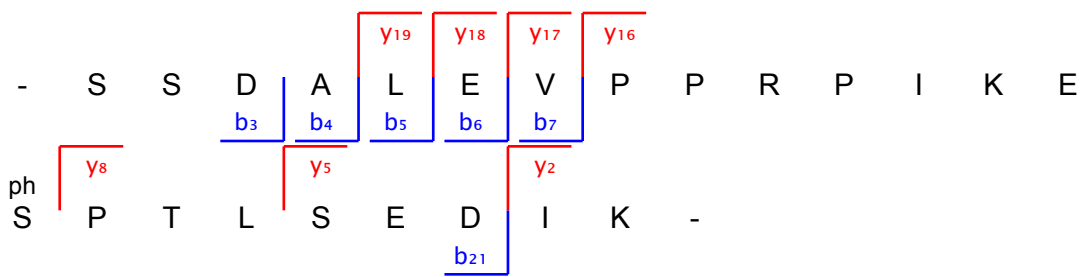

Raw file Scan Method Score m/z  
 Recip\_2\_34\_38 19118 FTMS; HCD 116.43 922.9

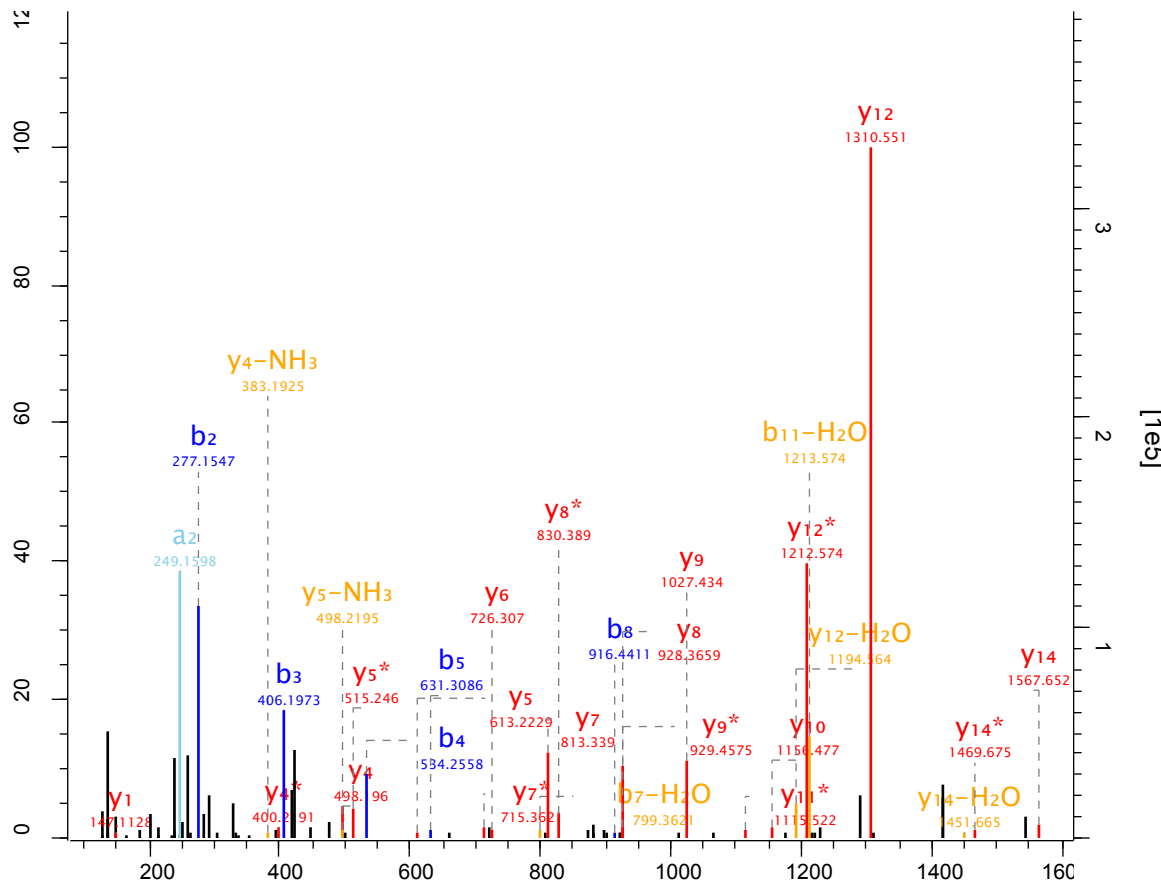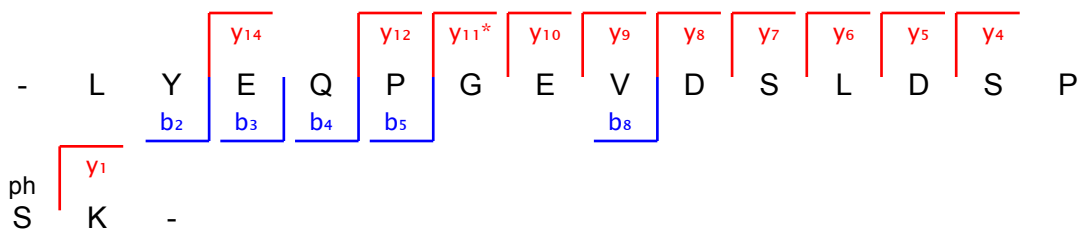



Raw file Scan Method Score m/z  
 Recip\_2\_34\_38 19353 FTMS; HCD 87.73 566.75

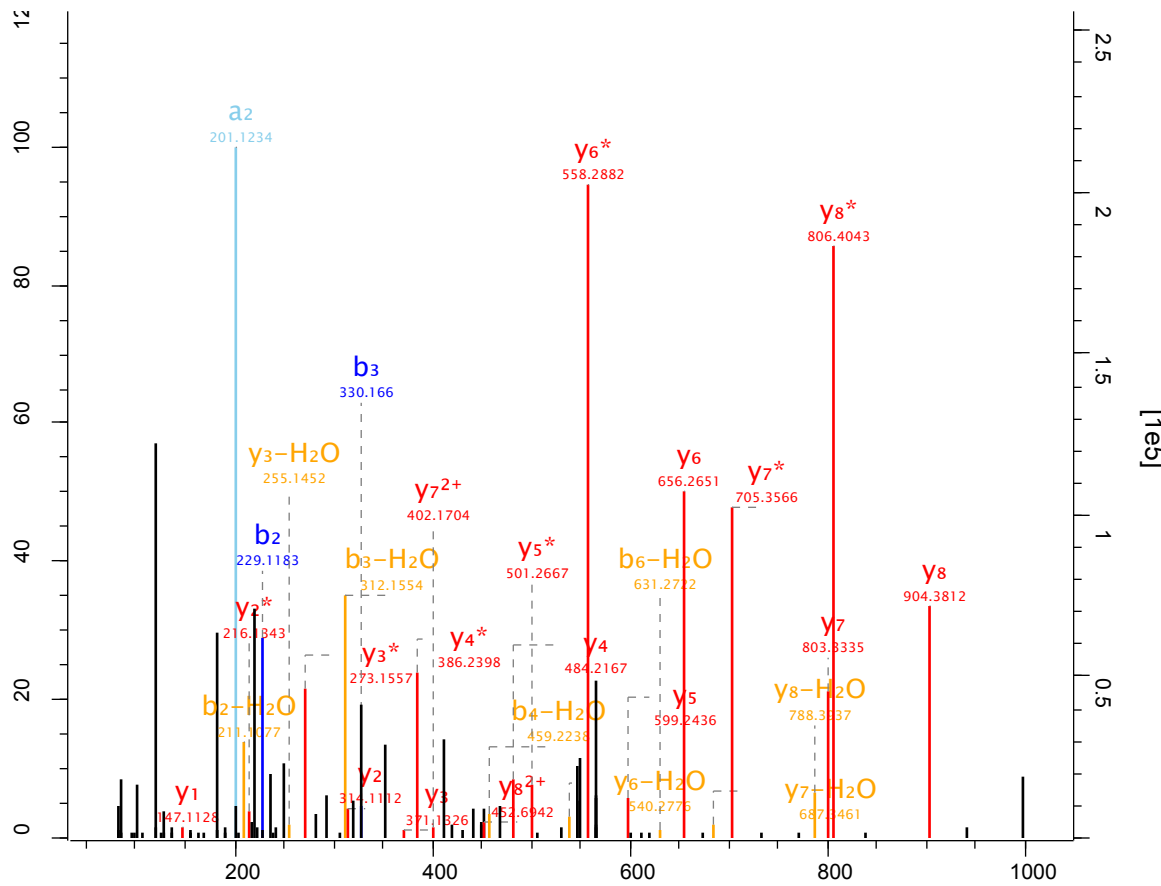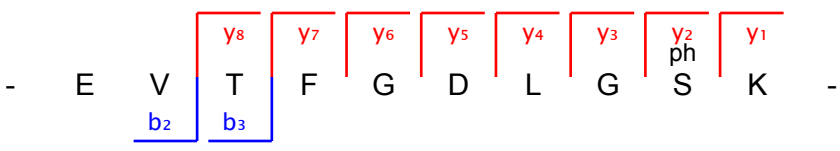

Raw file Scan Method Score m/z  
 Recip\_2\_34\_38 19426 FTMS; HCD 51.5 832.35

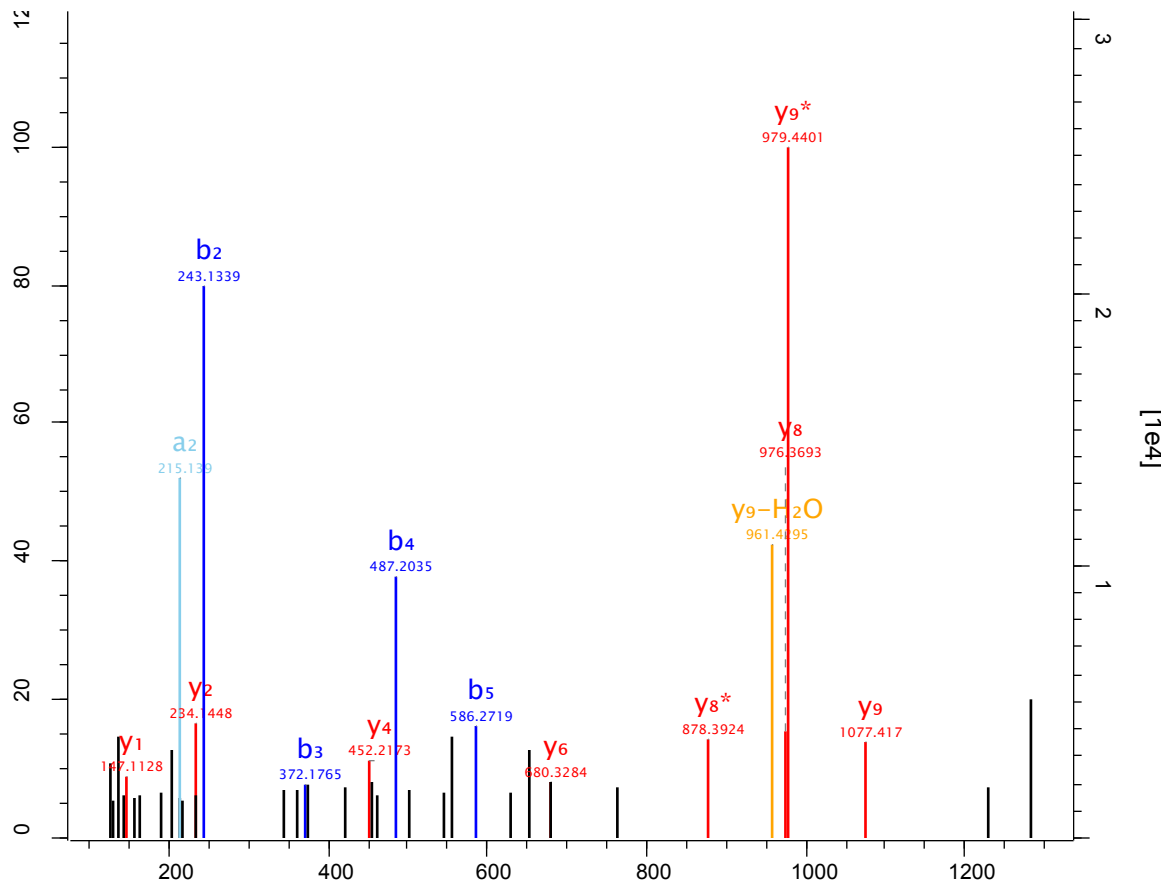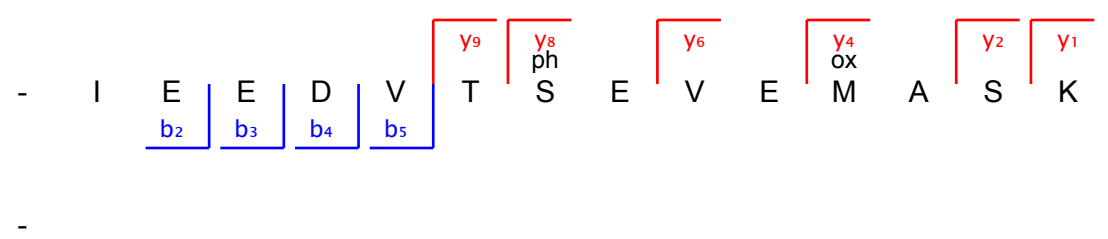

Raw file Scan Method Score m/z  
 Recip\_2\_34\_38 19598 FTMS; HCD 88.09 989.37

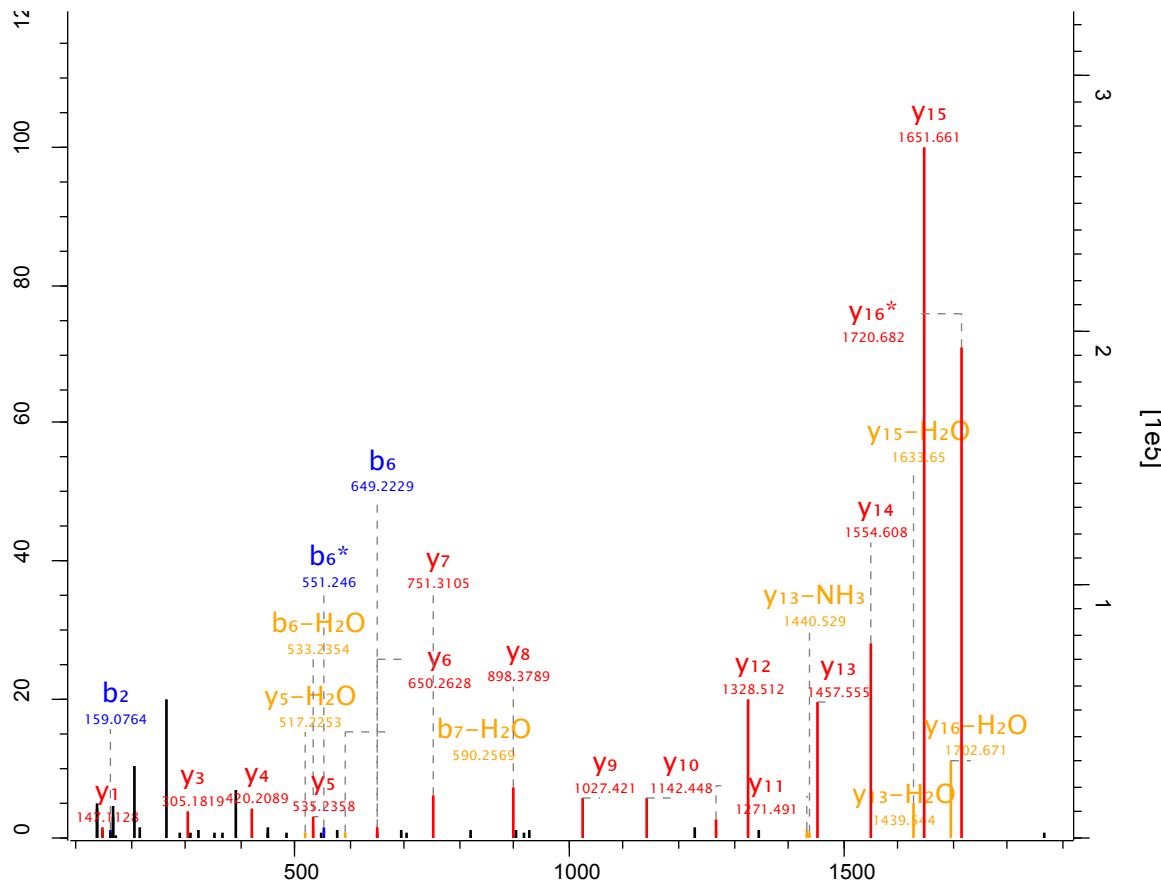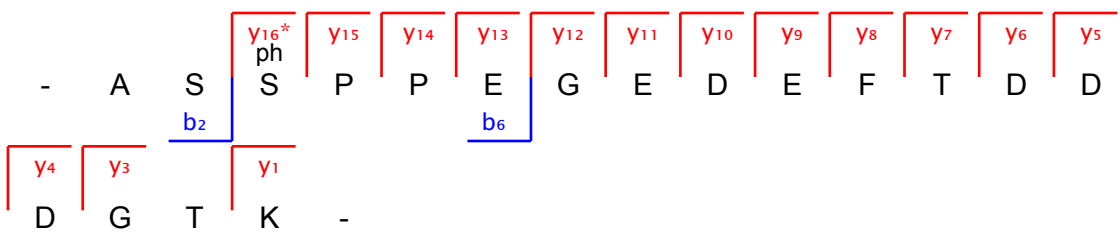

| Raw file      | Scan  | Method    | Score | m/z   |
|---------------|-------|-----------|-------|-------|
| Recip_2_34_38 | 19814 | FTMS; HCD | 47.55 | 725.3 |

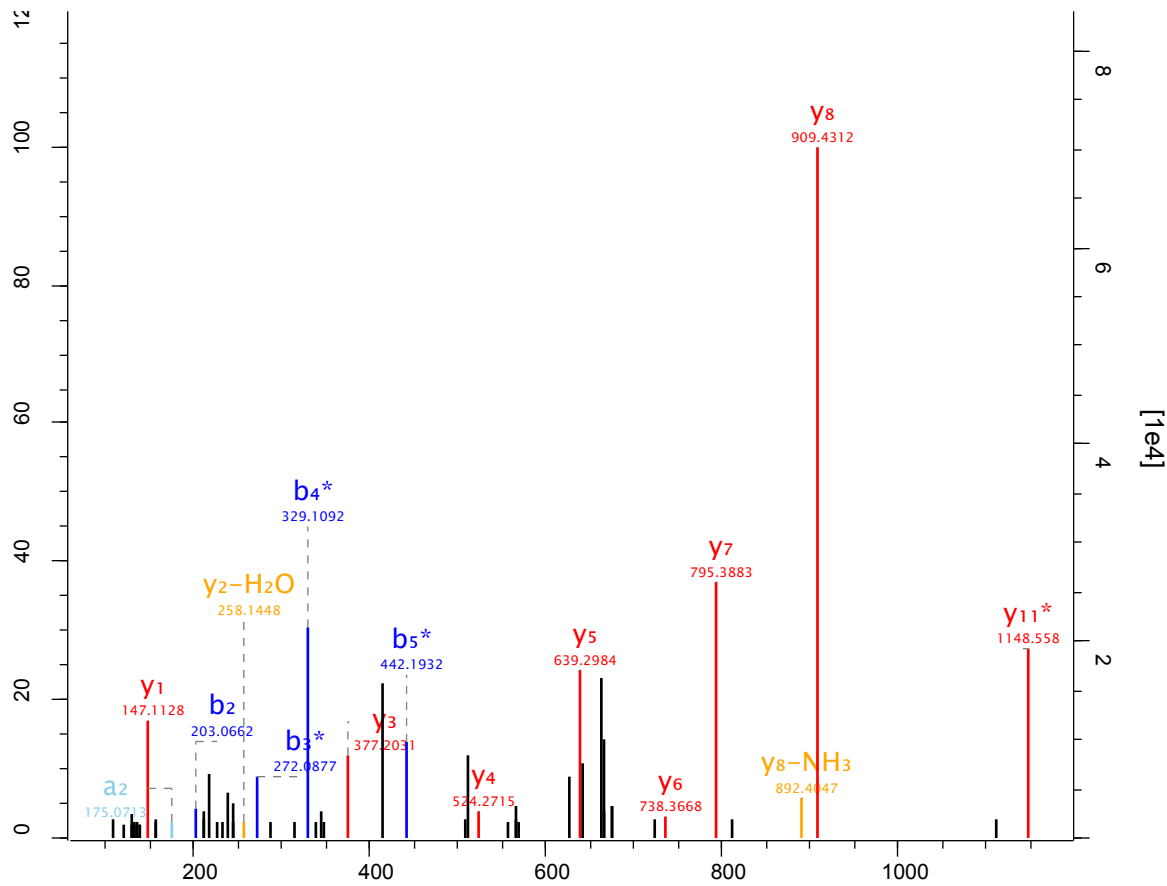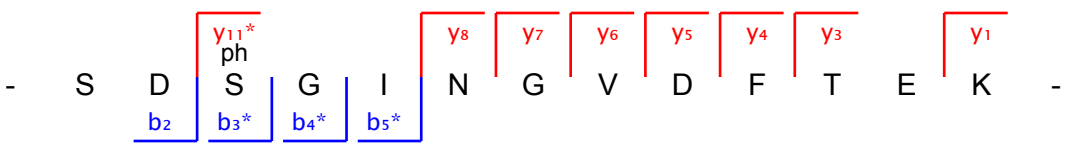

Raw file Scan Method Score m/z  
 Recip\_2\_34\_38 19971 FTMS; HCD 155.17 688.99

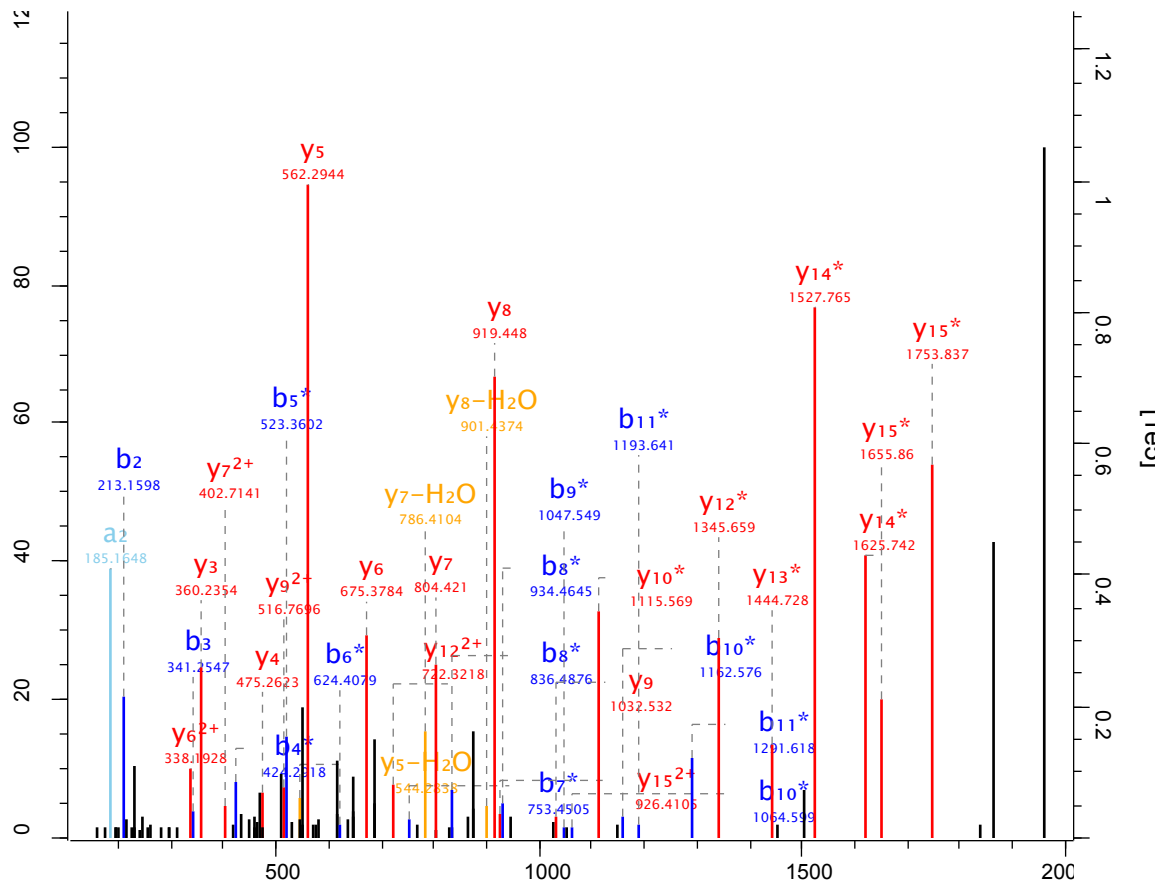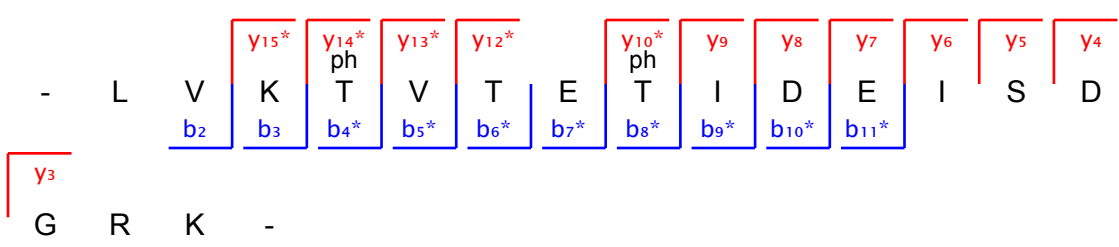

Raw file Scan Method Score m/z  
 Recip\_2\_34\_38 20040 FTMS; HCD 43.03 663.3

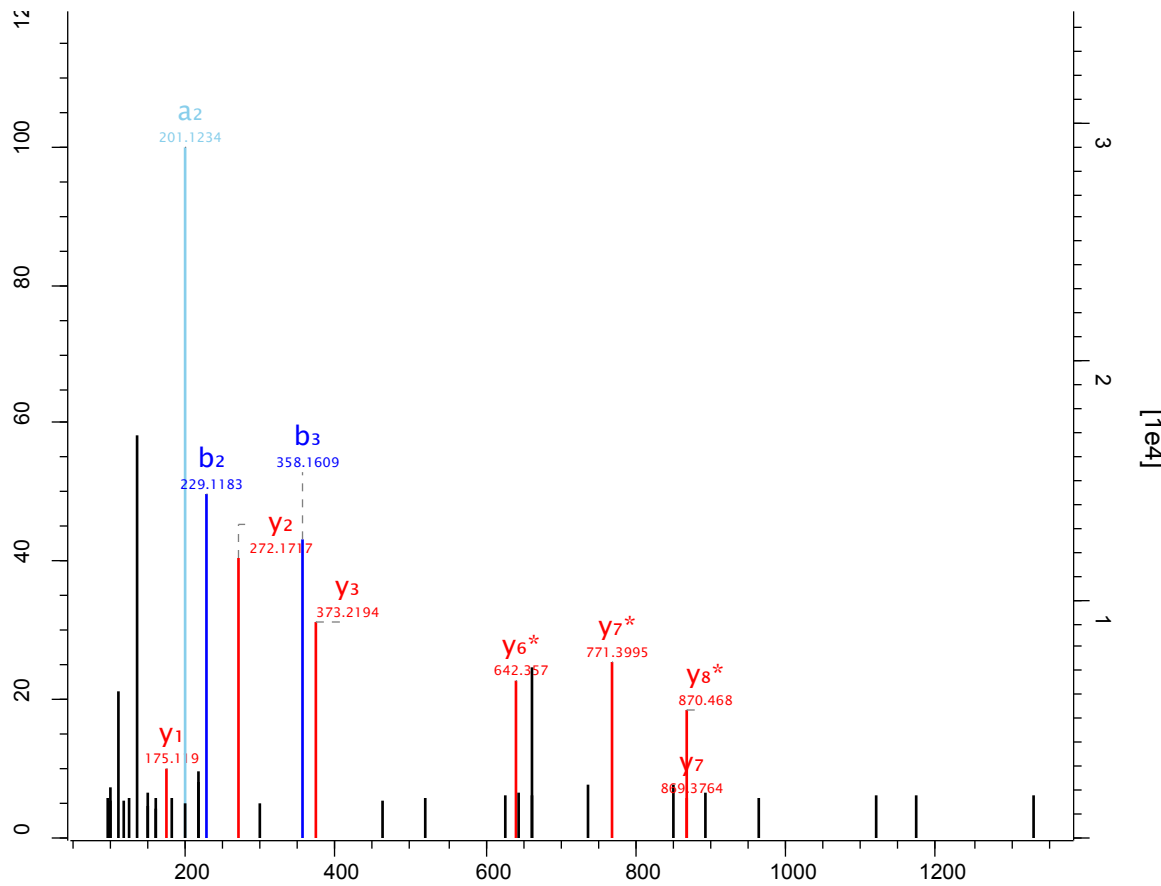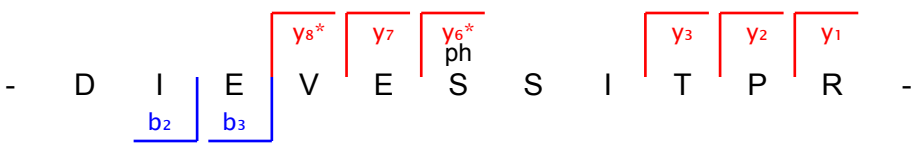

Raw file Scan Method Score m/z  
 Recip\_2\_34\_38 20053 FTMS; HCD 42.47 1068.86

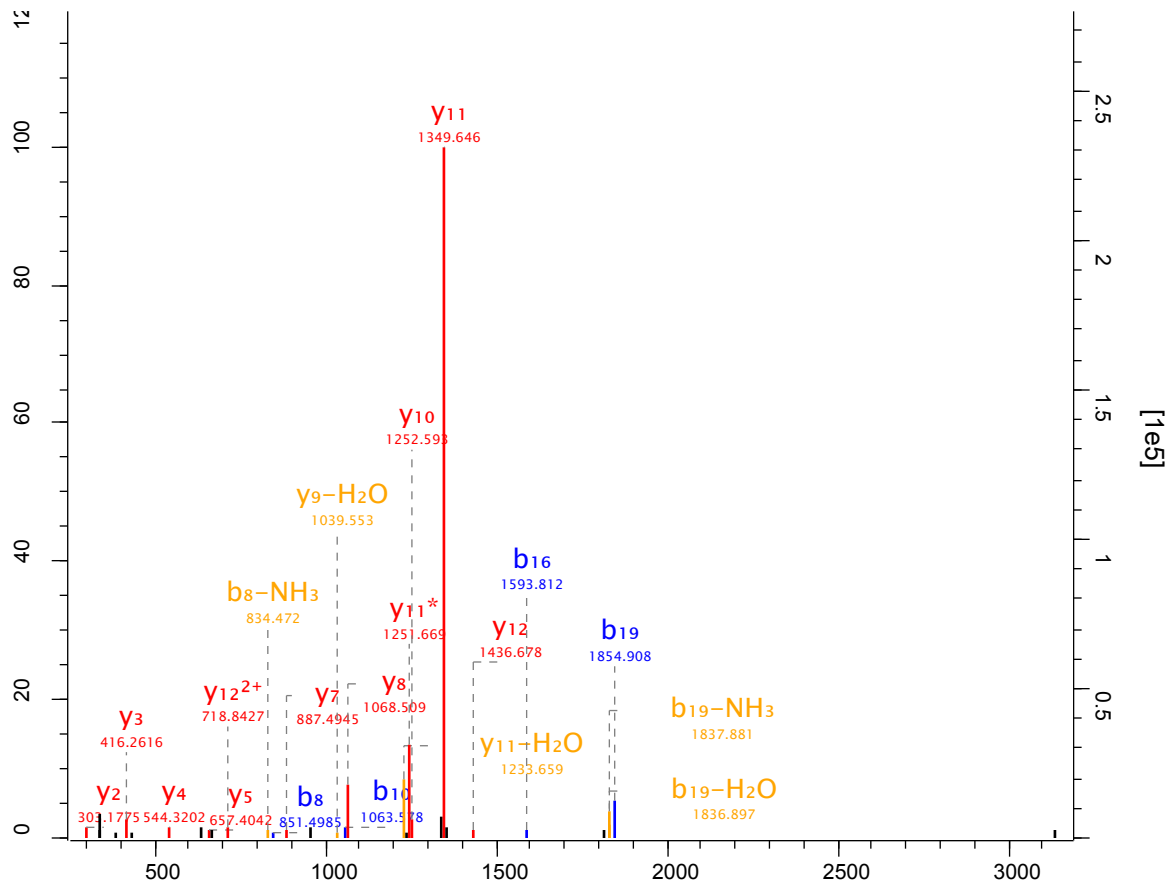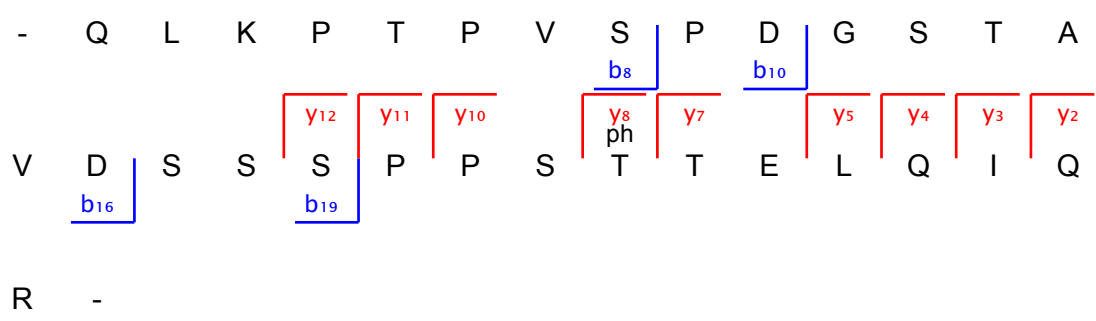

Raw file Scan Method Score m/z  
 Recip\_2\_34\_38 20100 FTMS; HCD 77.18 536.76

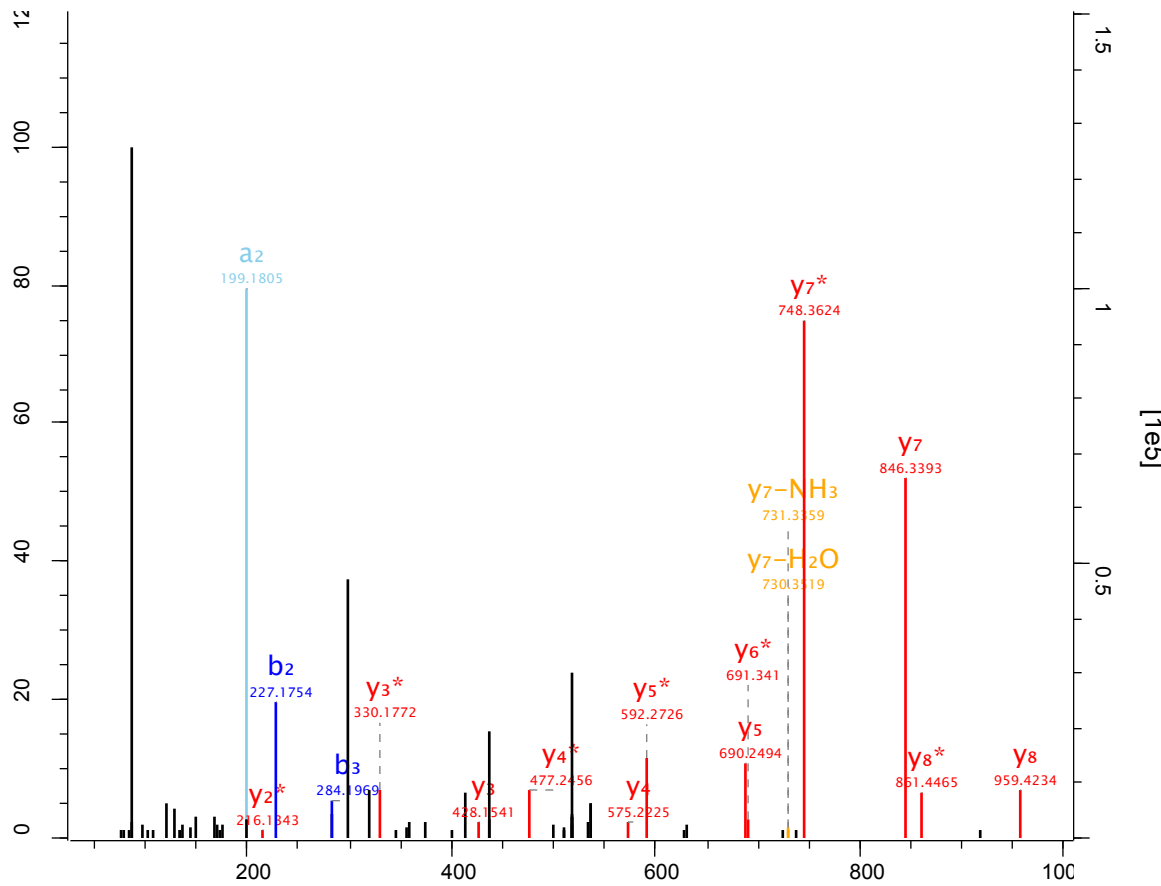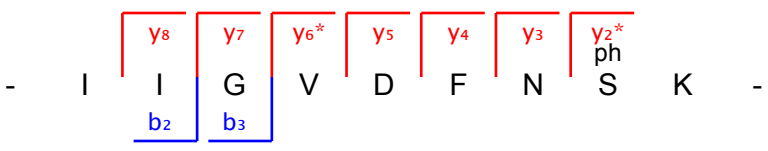



Raw file Scan Method Score m/z  
 Recip\_2\_34\_38 20323 FTMS; HCD 122.34 551.77

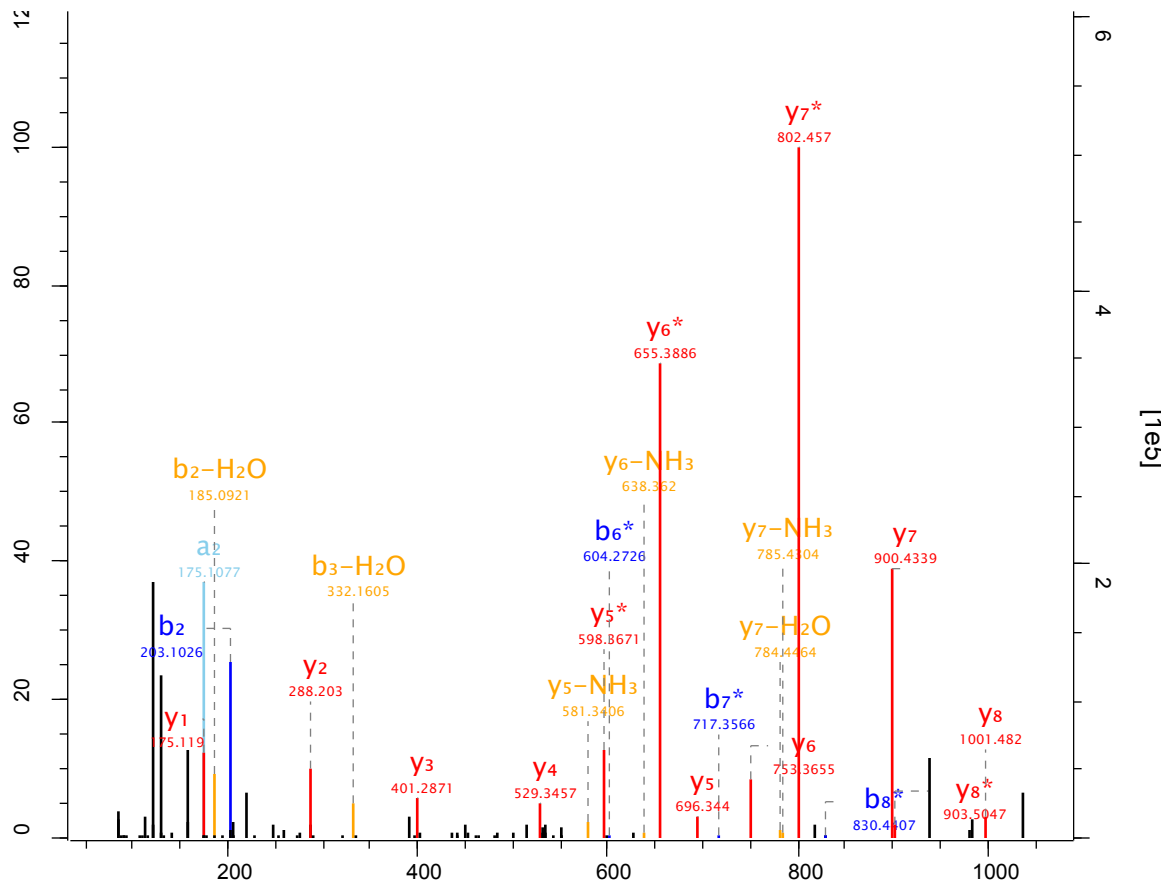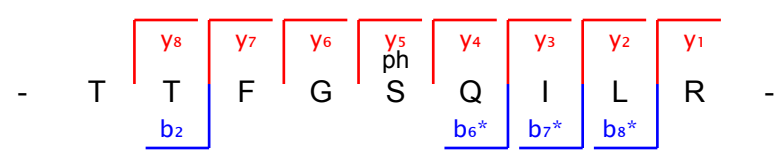

Raw file Scan Method Score m/z  
 Recip\_2\_34\_38 20459 FTMS; HCD 159.69 760.89

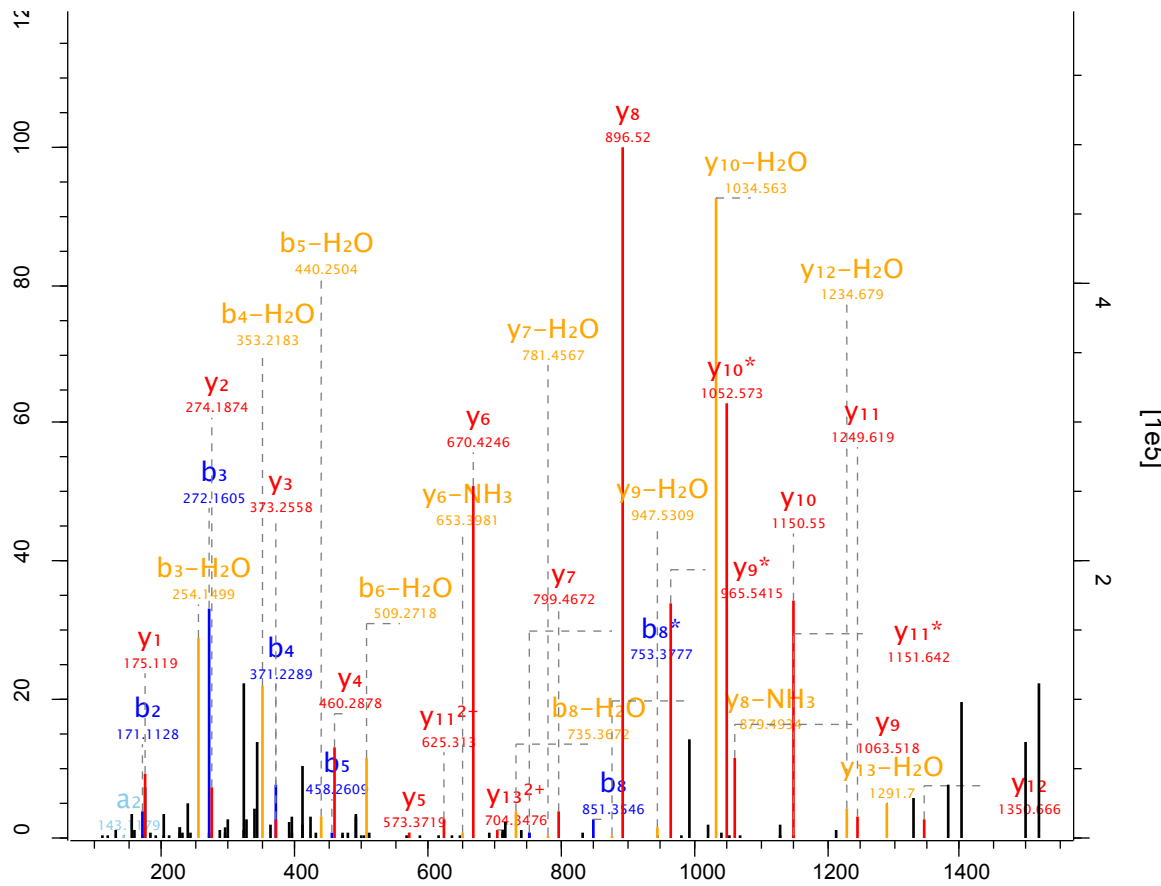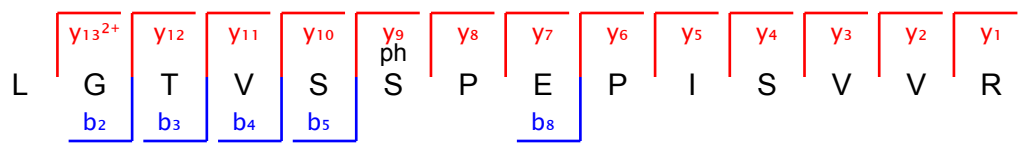

Raw file Scan Method Score m/z  
 Recip\_2\_34\_38 20488 FTMS; HCD 96.88 989.46

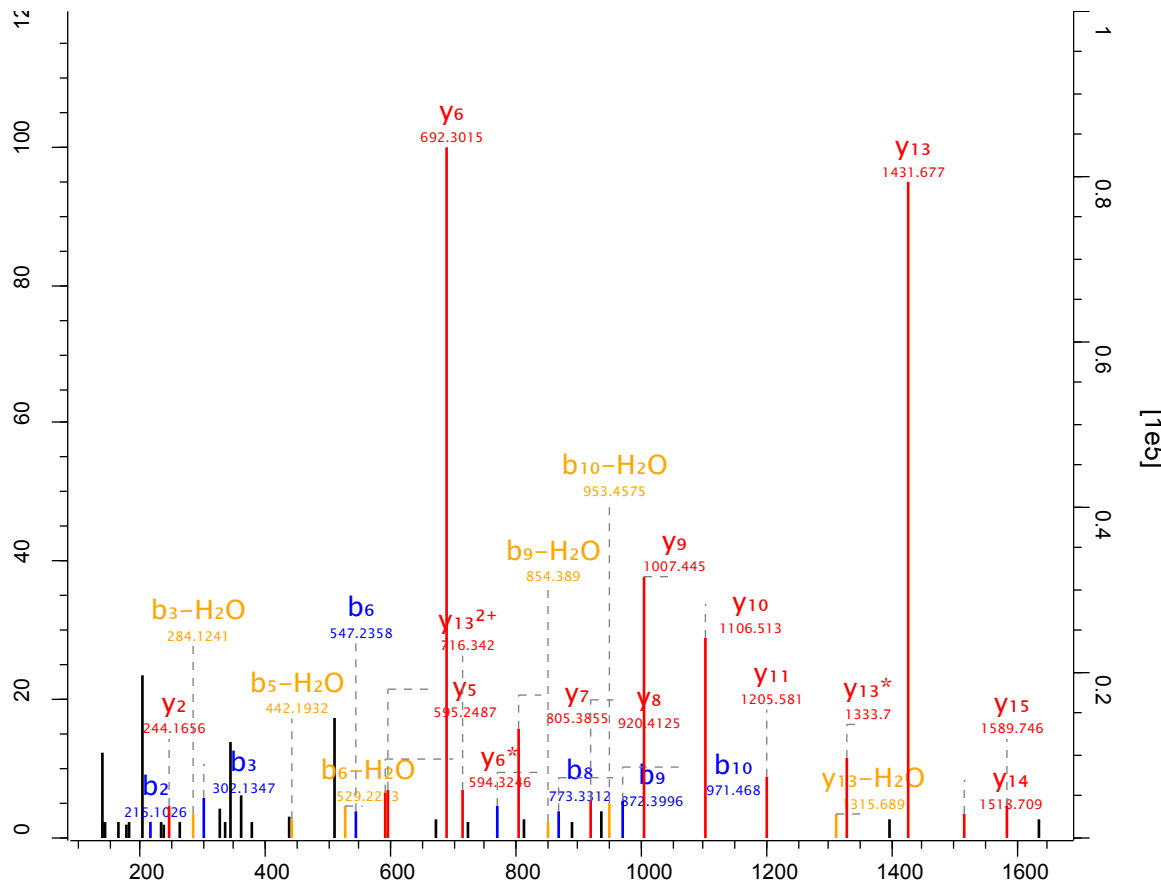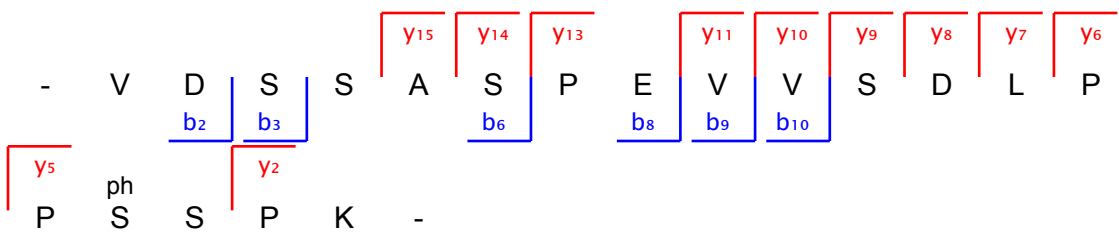

Raw file Scan Method Score m/z  
 Recip\_2\_34\_38 20563 FTMS; HCD 130.56 618.78

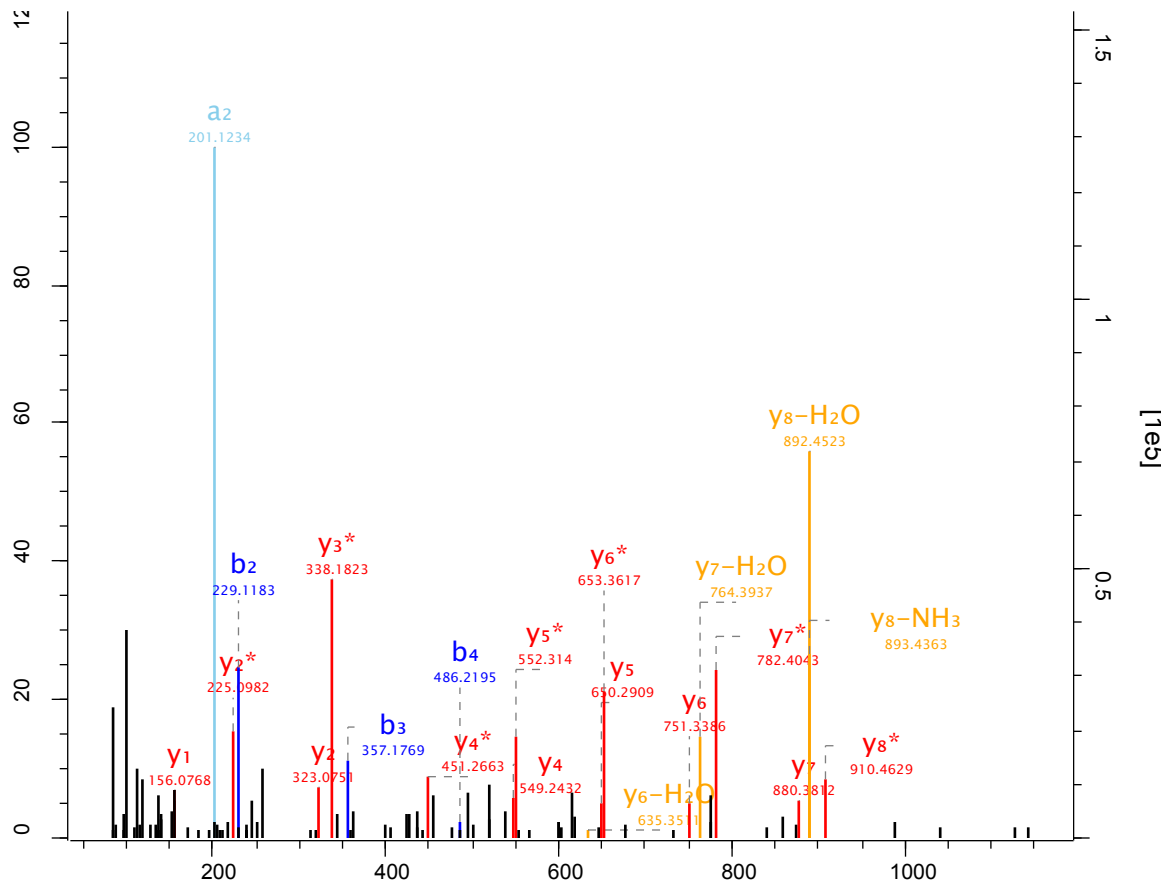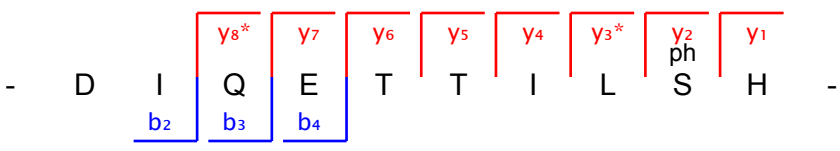

Raw file Scan Method Score m/z  
 Recip\_2\_34\_38 20727 FTMS; HCD 132.97 588.77

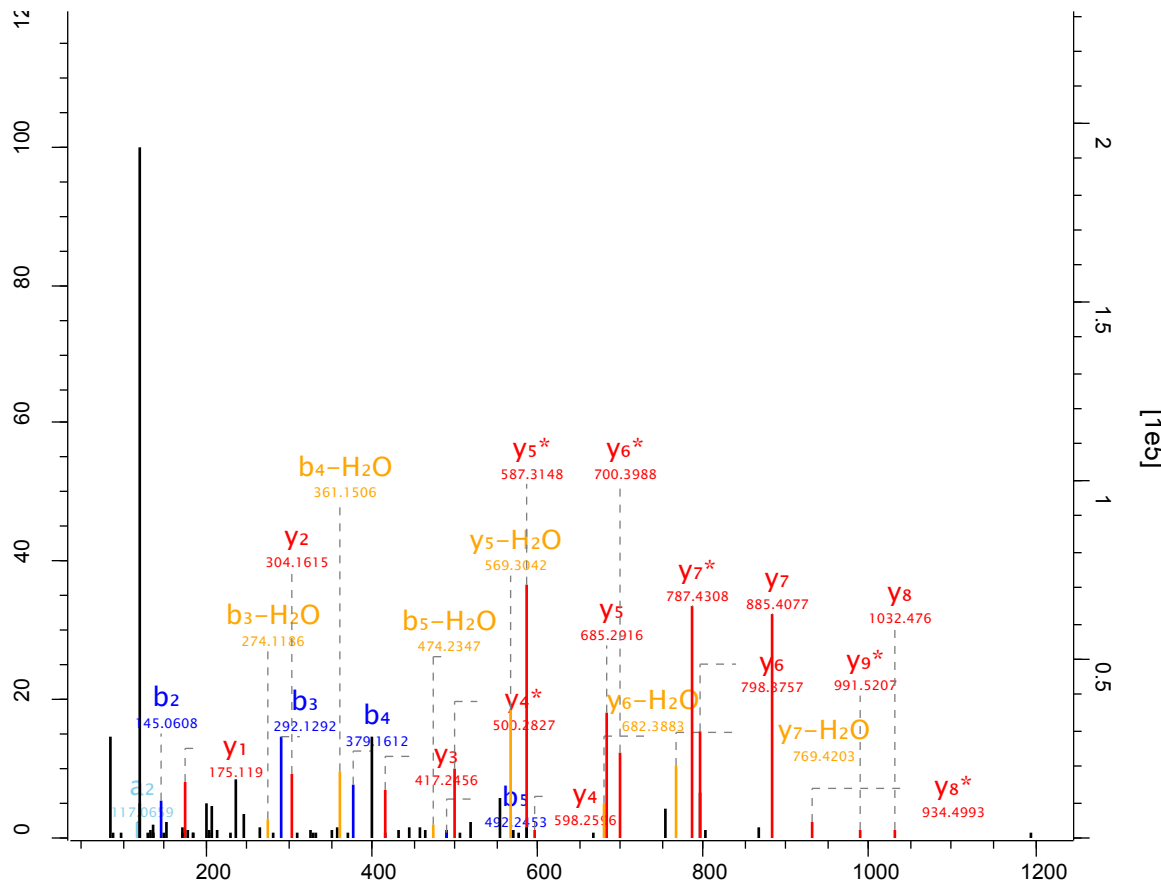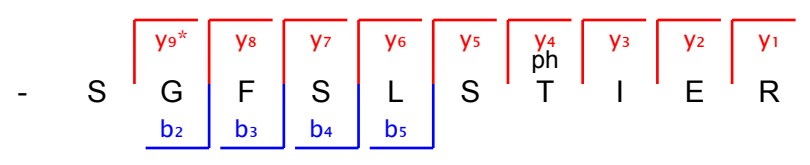

Raw file Scan Method Score m/z  
 Recip\_2\_34\_38 20840 FTMS; HCD 124.25 853.42

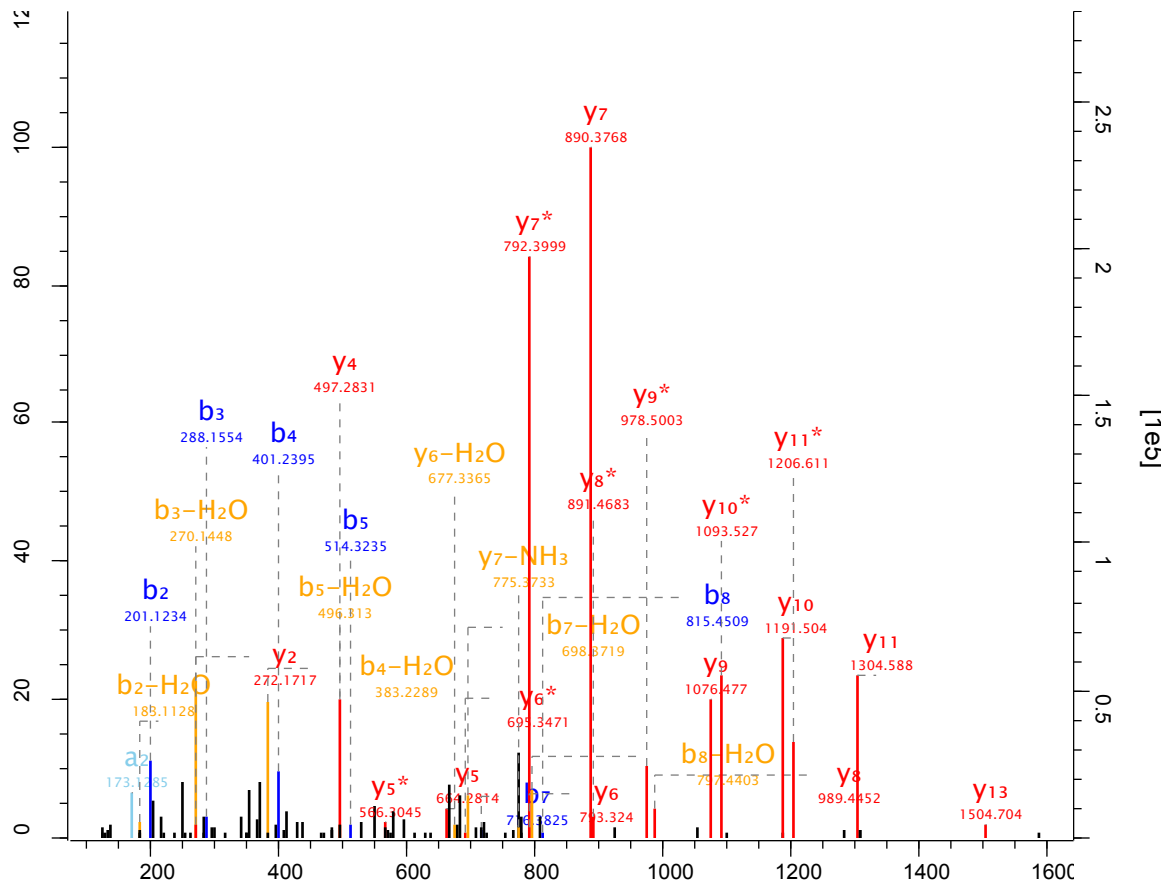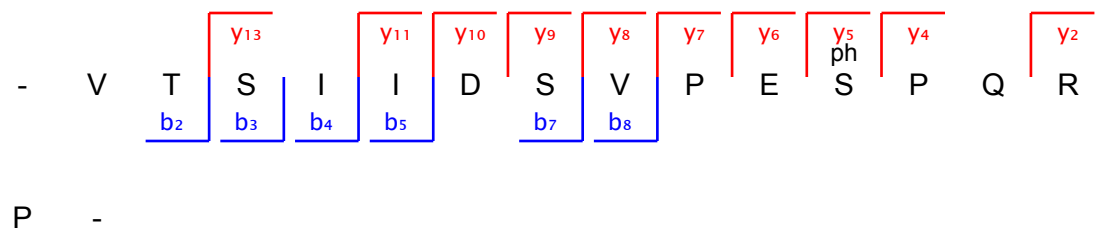

Raw file Scan Method Score m/z  
 Recip\_2\_34\_38 2111 FTMS; HCD 41.74 545.24

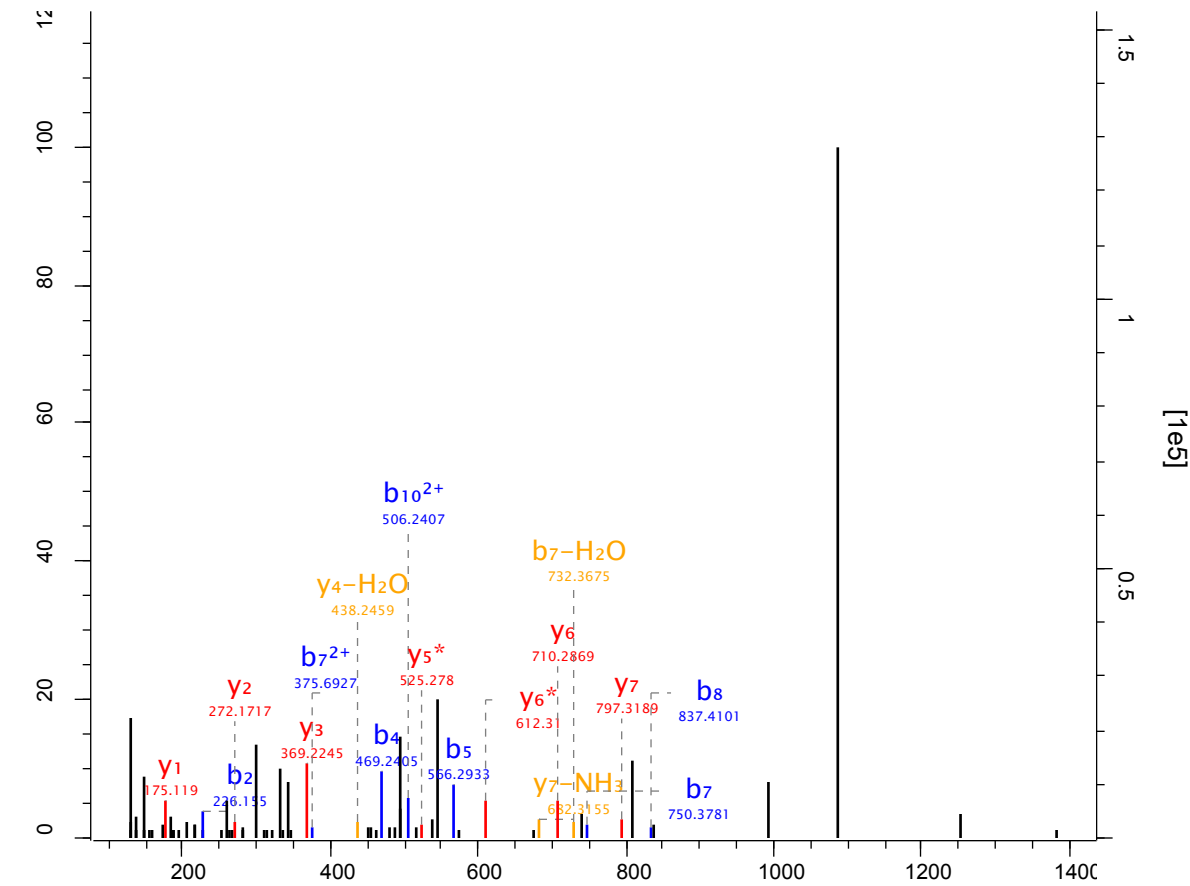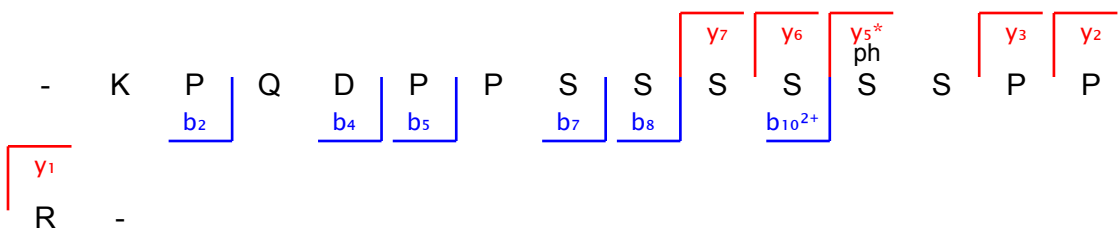

Raw file Scan Method Score m/z  
 Recip\_2\_34\_38 21169 FTMS; HCD 136.33 715.34

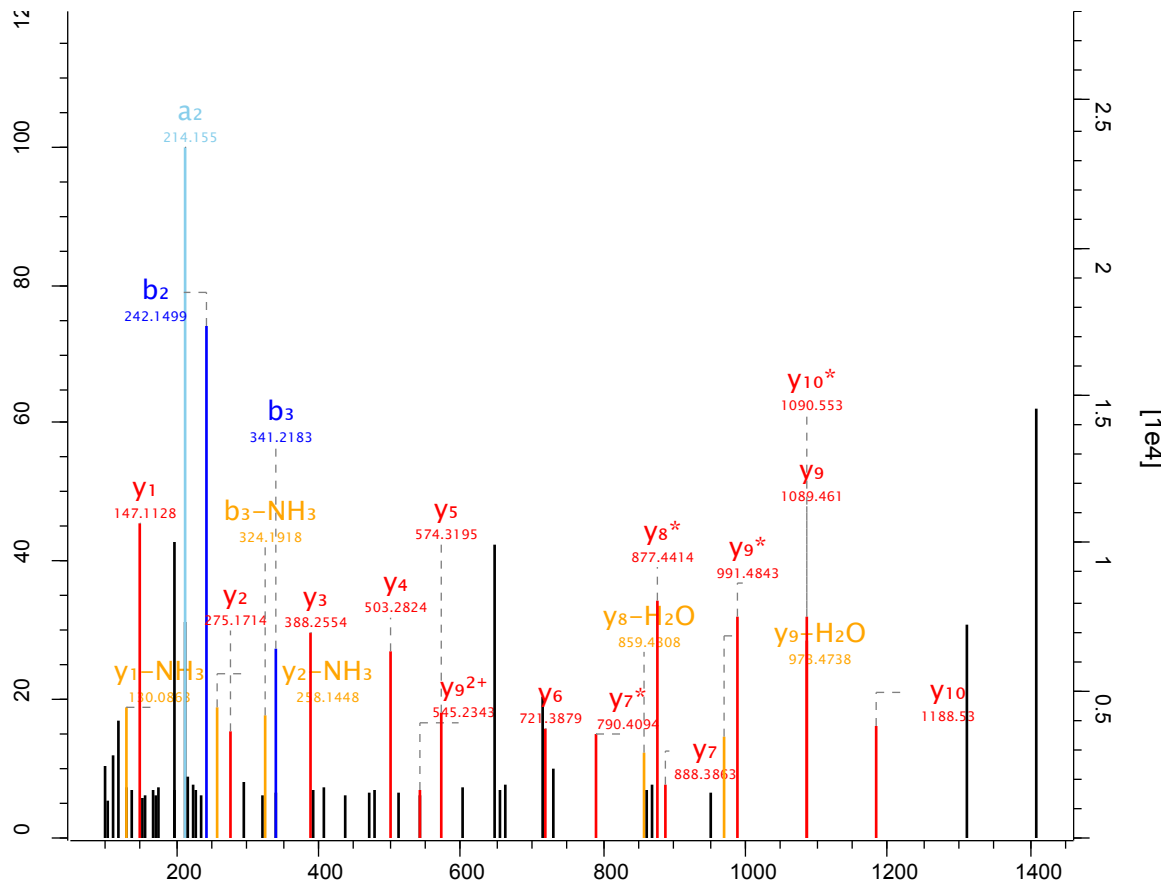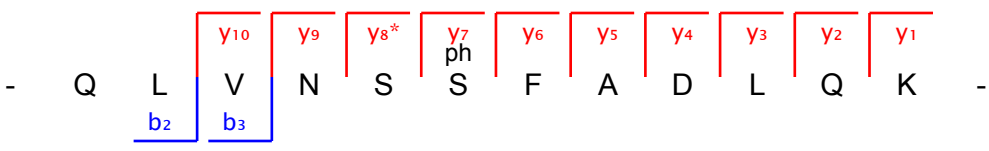



Raw file Scan Method Score m/z  
 Recip\_2\_34\_38 21185 FTMS; HCD 83.25 609.62

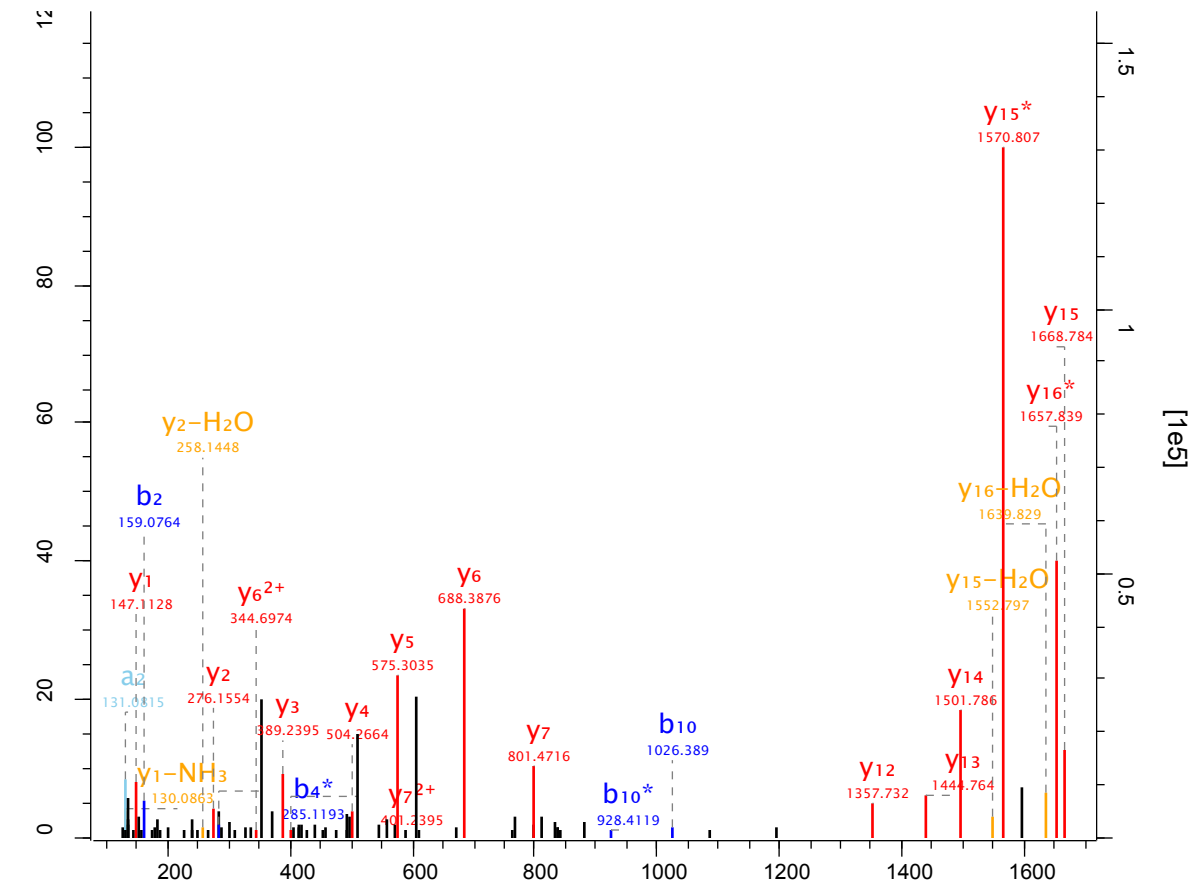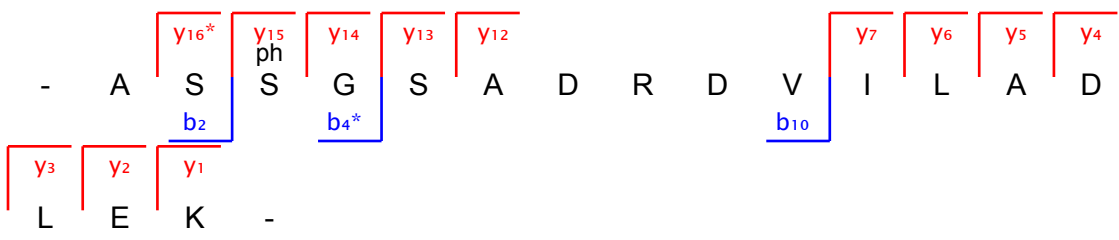

Raw file Scan Method Score m/z  
 Recip\_2\_34\_38 21264 FTMS; HCD 46.32 637.81

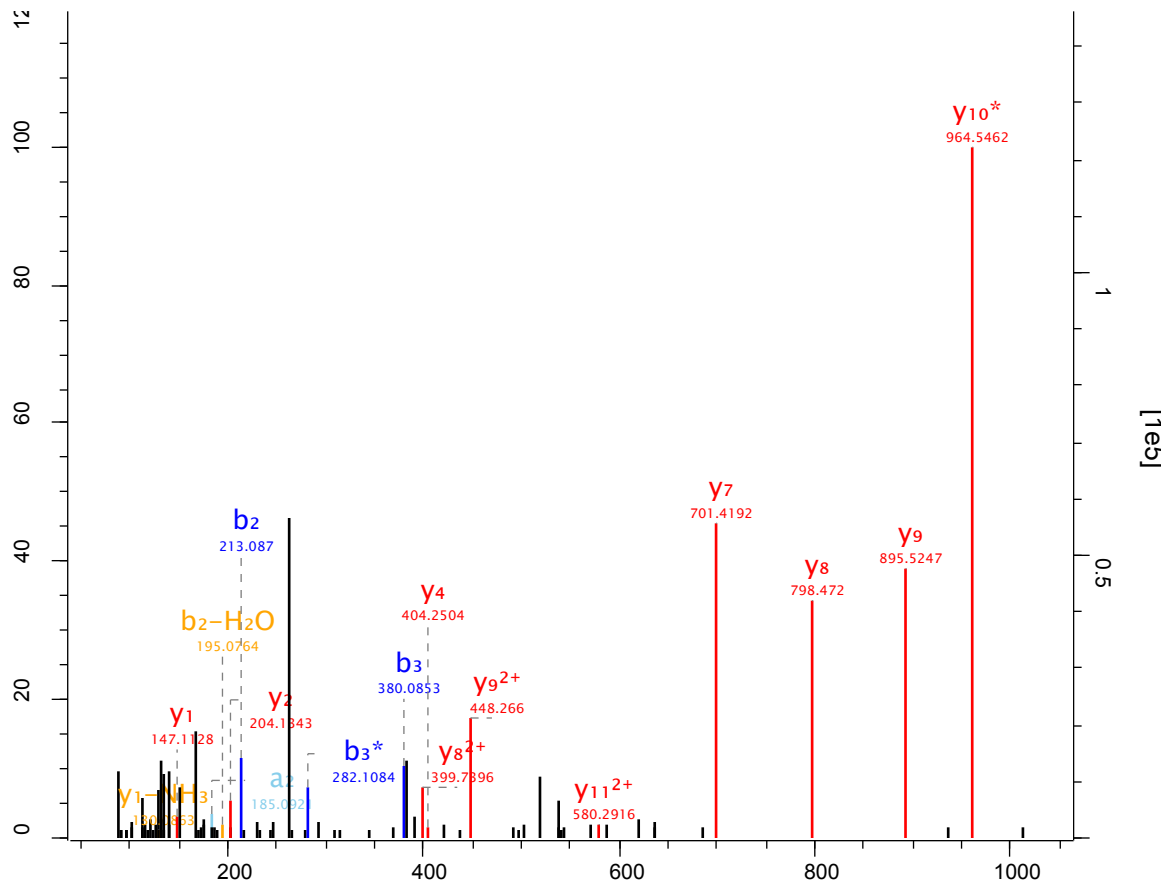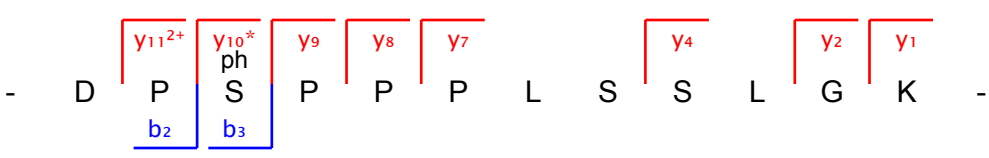

| Raw file      | Scan  | Method    | Score | m/z    |
|---------------|-------|-----------|-------|--------|
| Recip_2_34_38 | 21337 | FTMS; HCD | 47.97 | 563.74 |

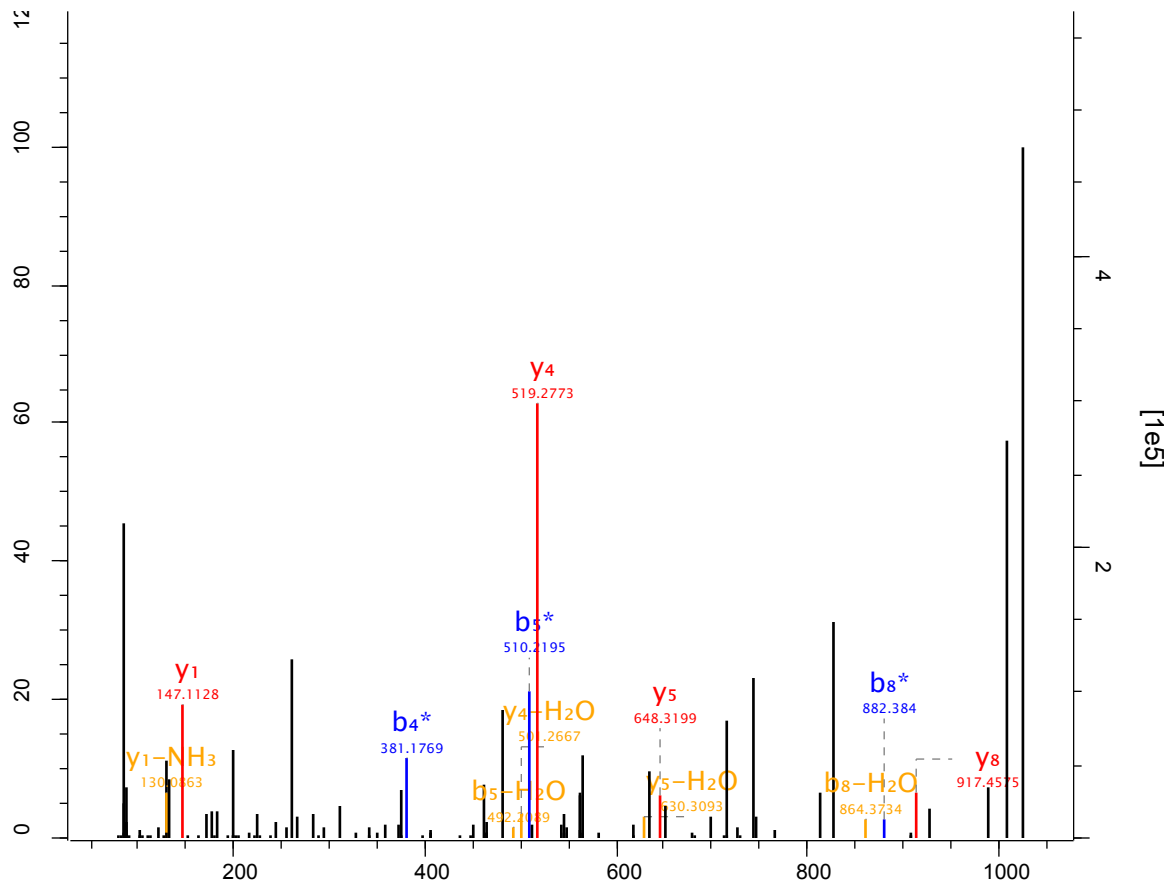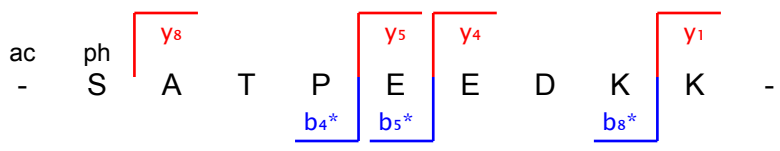

Raw file Scan Method Score m/z  
 Recip\_2\_34\_38 21354 FTMS; HCD 80.74 760.37

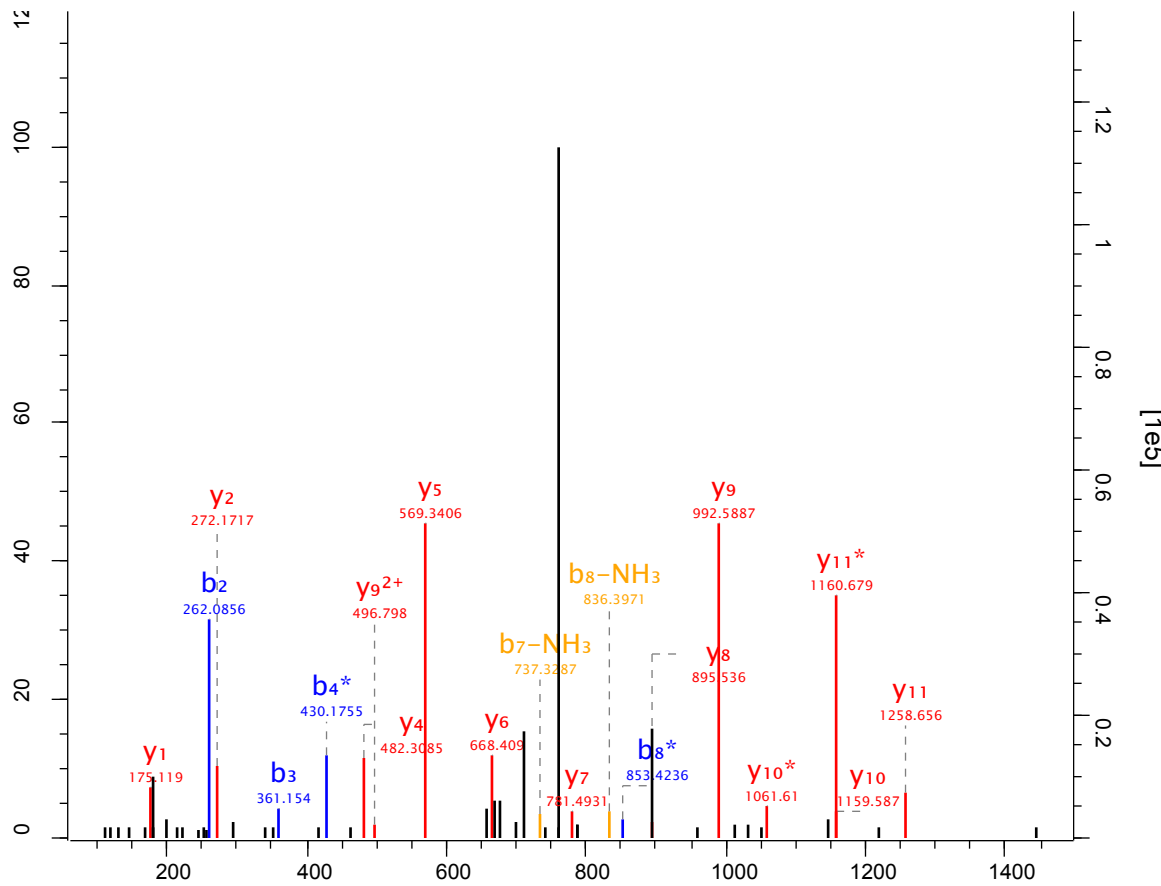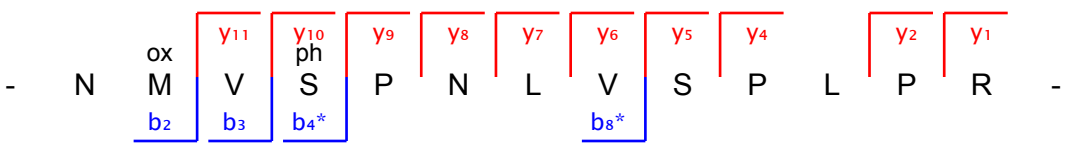

Raw file Scan Method Score m/z  
 Recip\_2\_34\_38 21698 FTMS; HCD 76.82 729.82

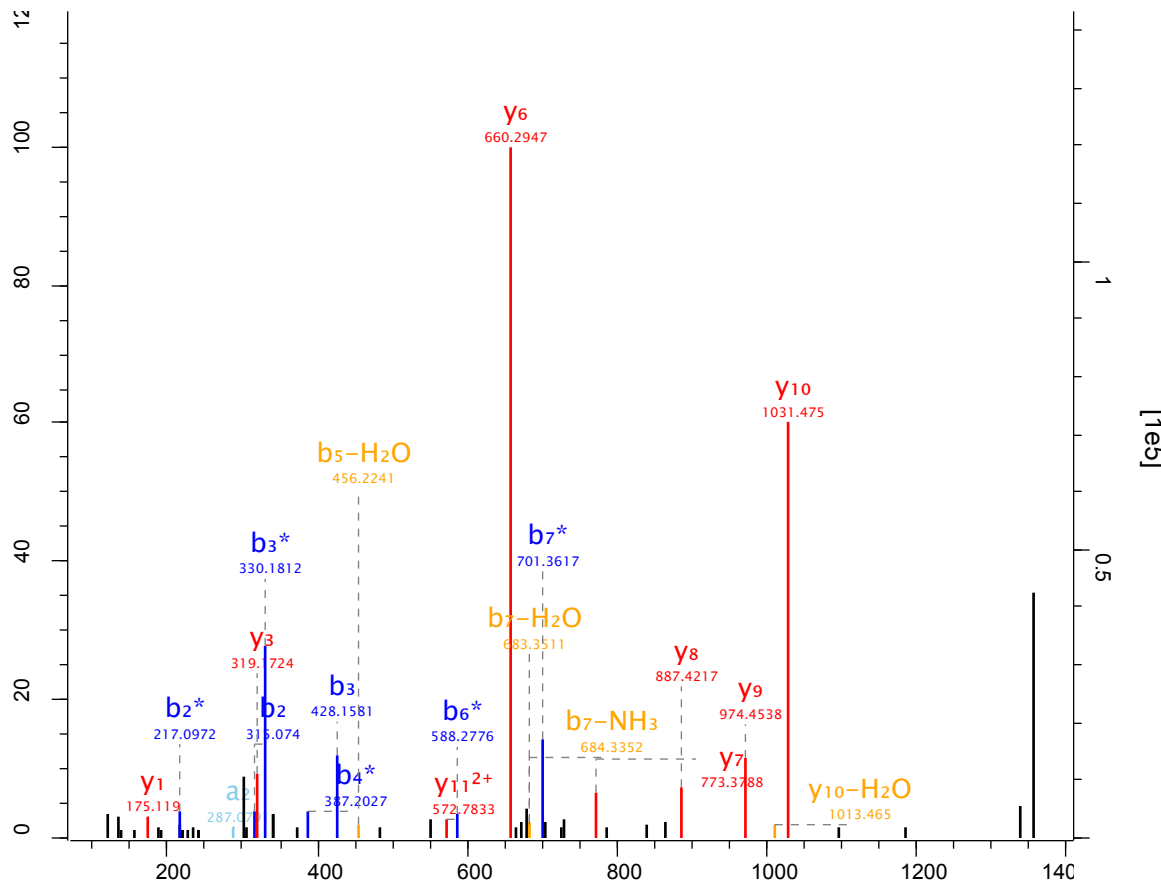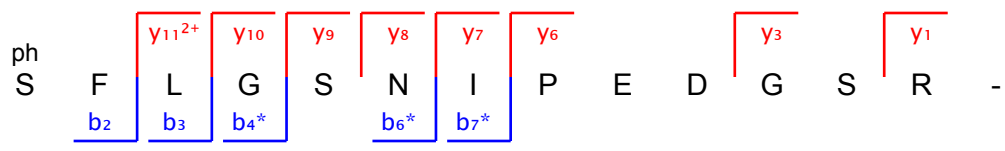

Raw file Scan Method Score m/z  
 Recip\_2\_34\_38 21787 FTMS; HCD 95.57 773.35

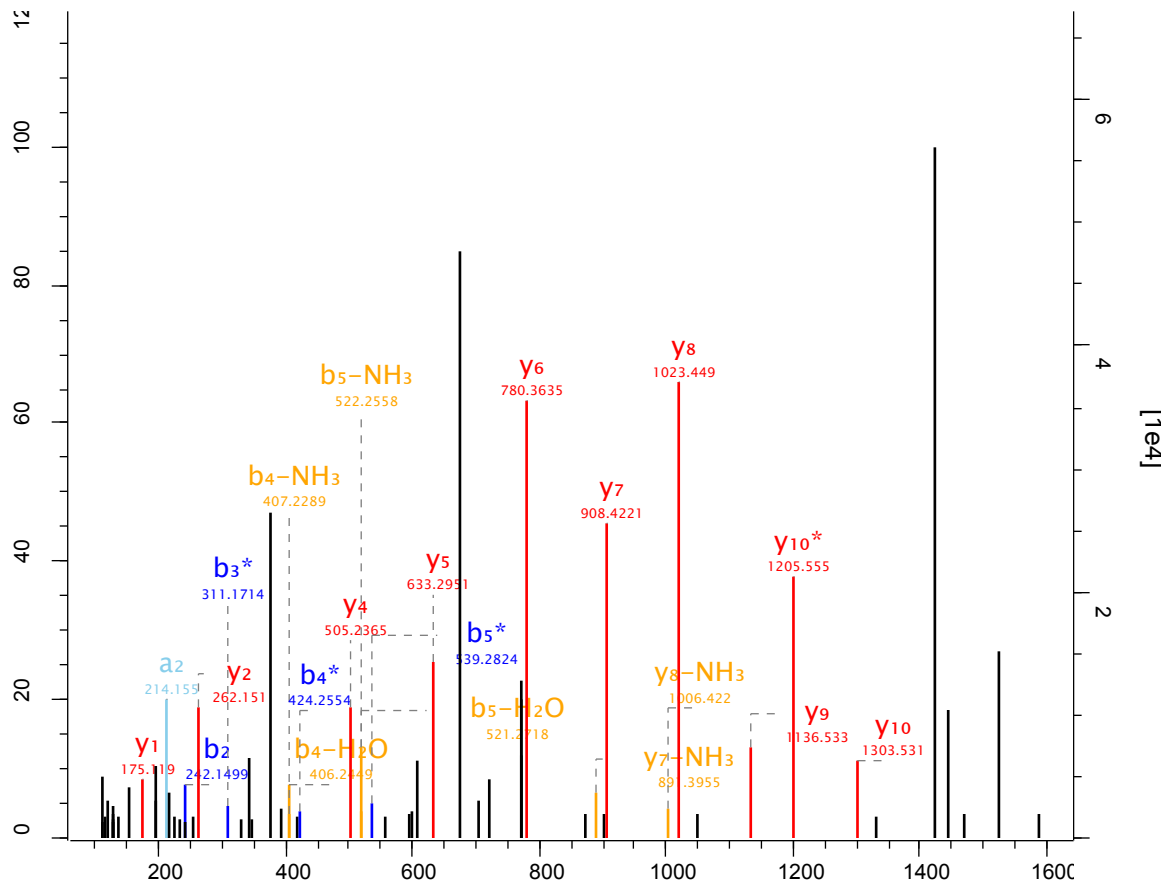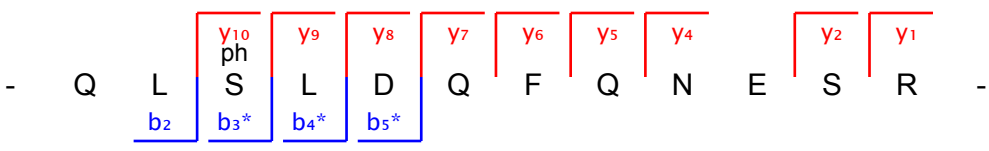

Raw file Scan Method Score m/z  
 Recip\_2\_34\_38 2185 FTMS; HCD 60.13 569.56

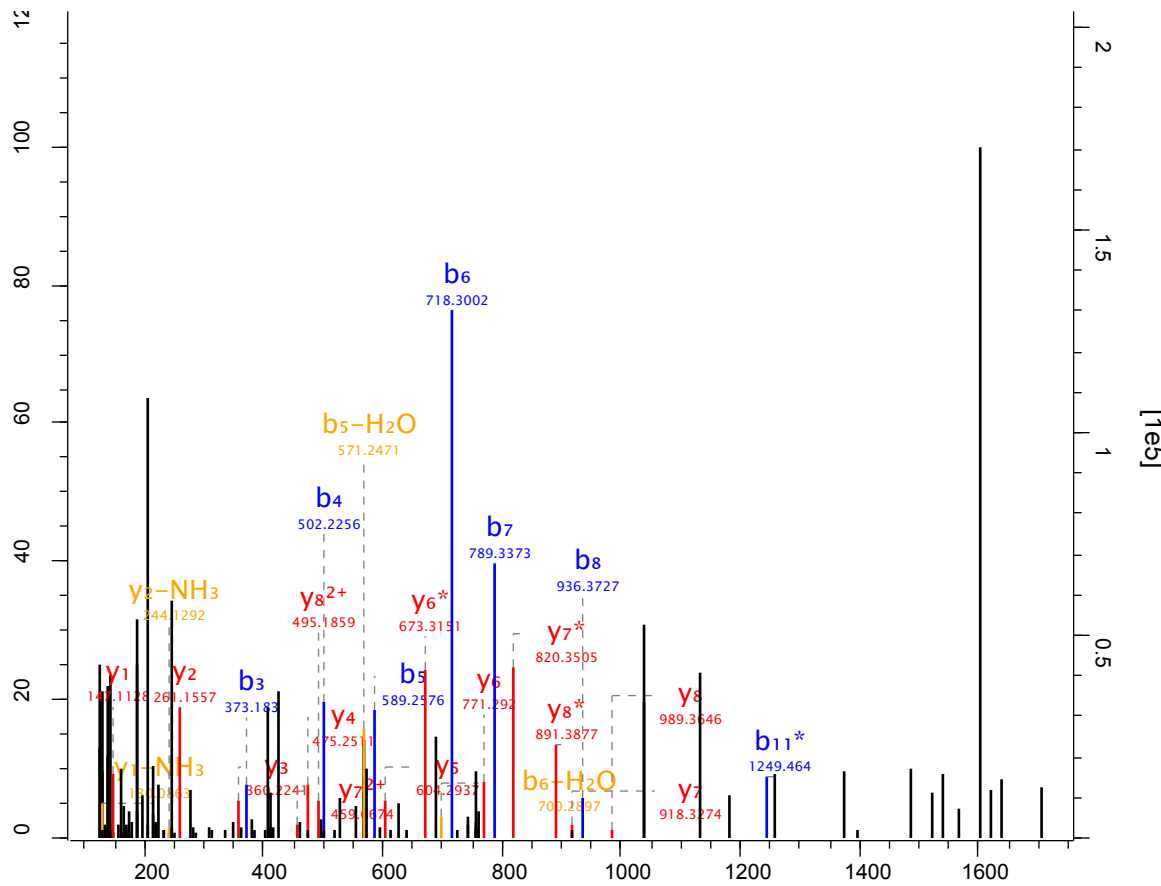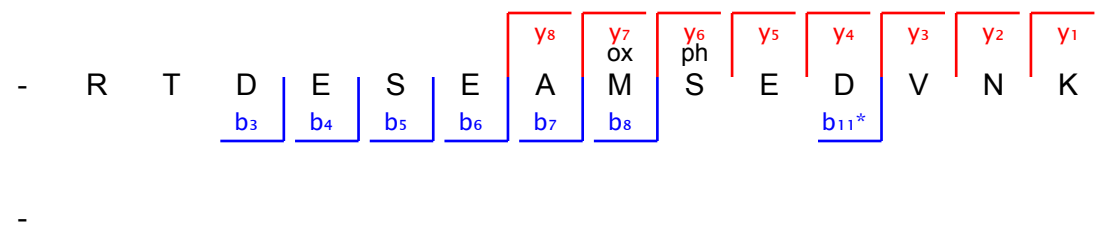

Raw file Scan Method Score m/z  
 Recip\_2\_34\_38 22216 FTMS; HCD 40.94 629.79

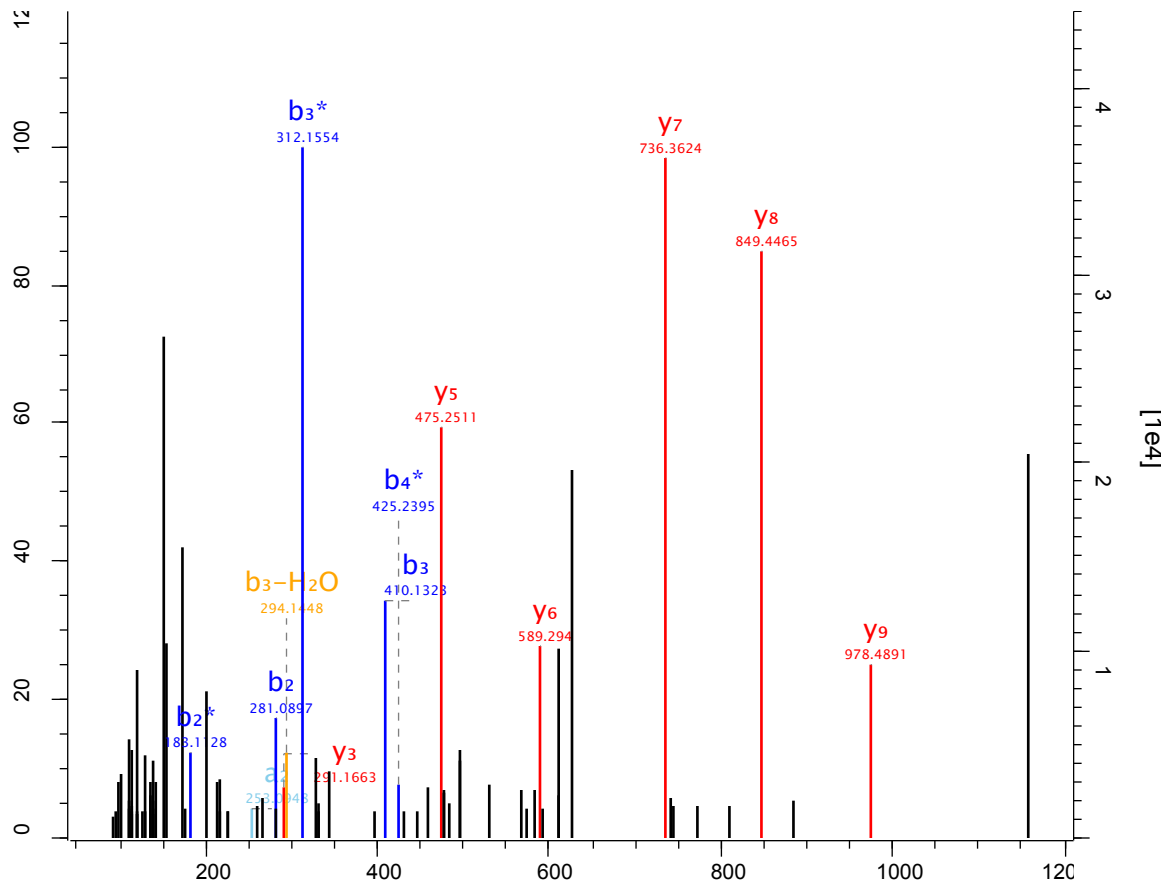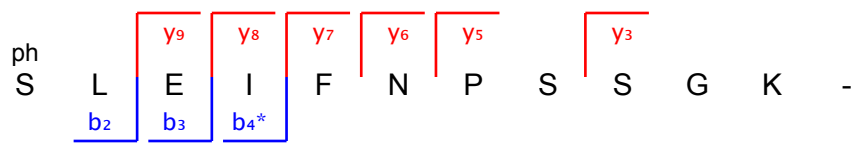



Raw file Scan Method m/z  
 Recip\_2\_34\_38 22401 FTMS; HCD 195.38 877.39

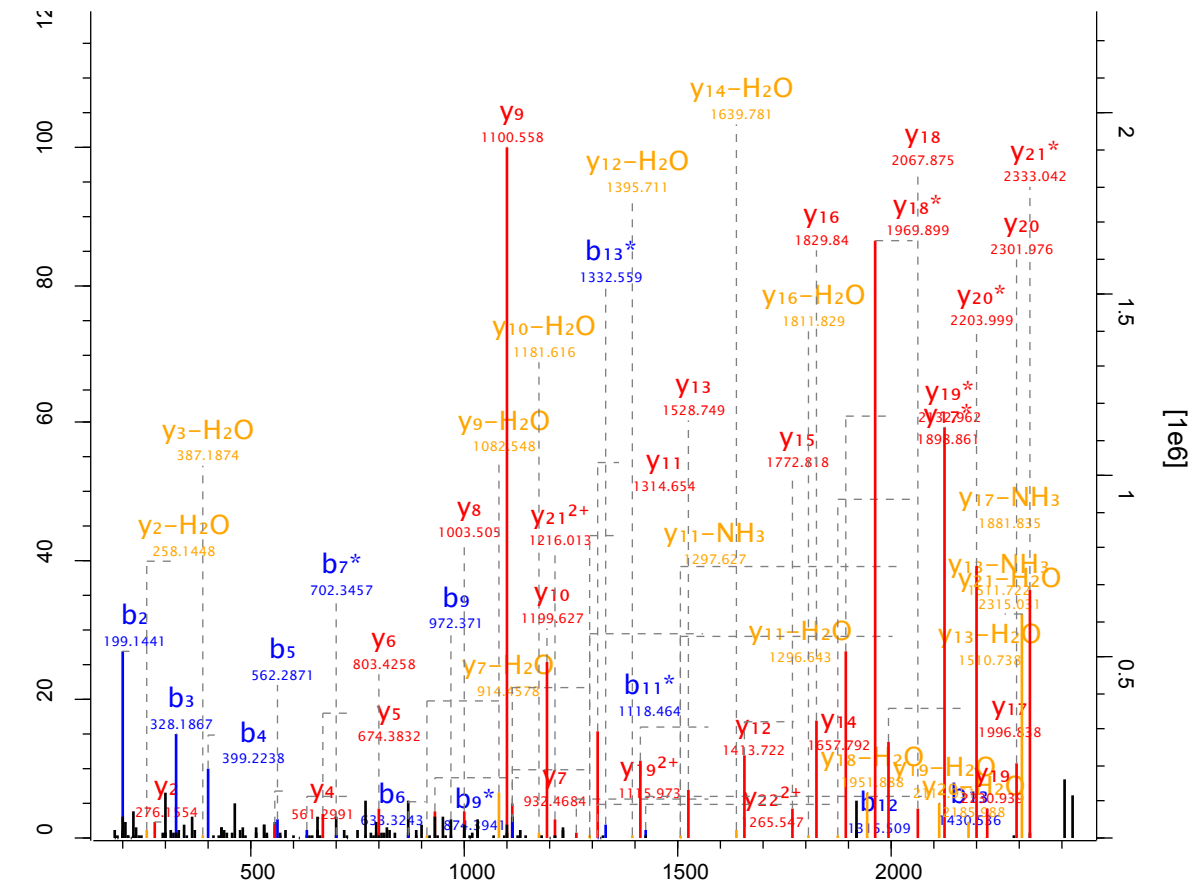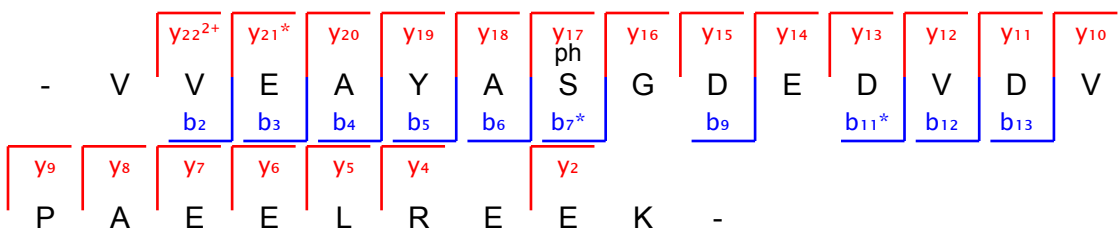

| Raw file      | Scan  | Method    | Score | m/z    |
|---------------|-------|-----------|-------|--------|
| Recip_2_34_38 | 22637 | FTMS; HCD | 79.38 | 789.05 |

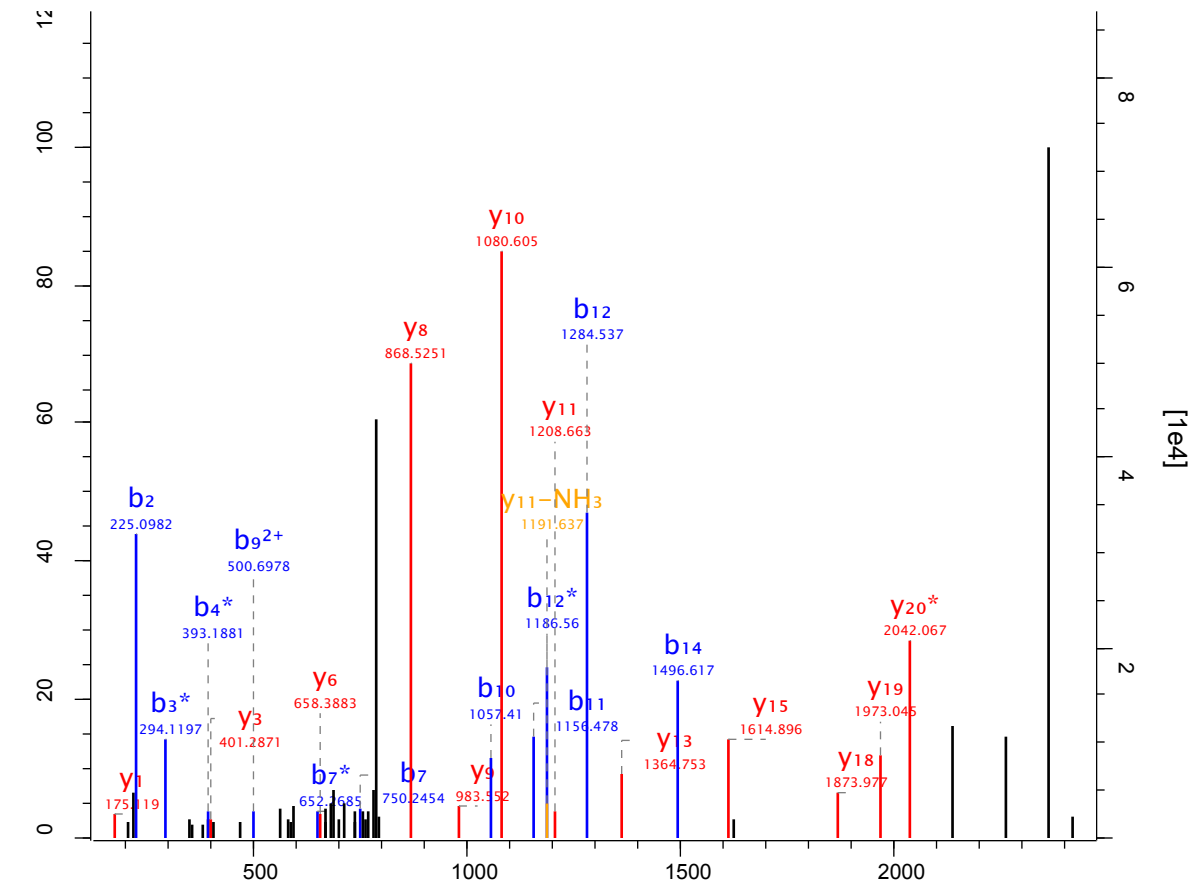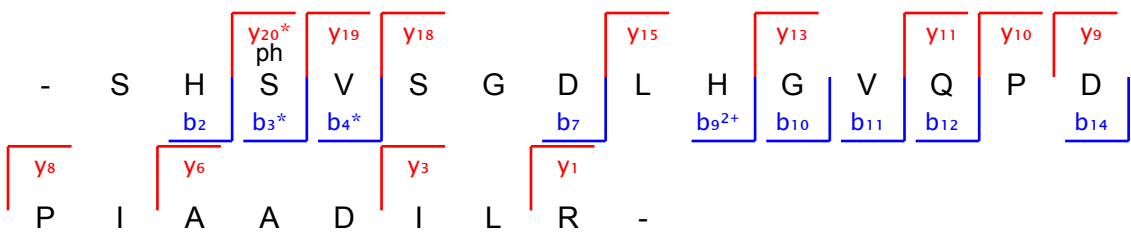

Raw file Scan Method Score m/z  
 Recip\_2\_34\_38 22805 FTMS; HCD 42.06 890.42

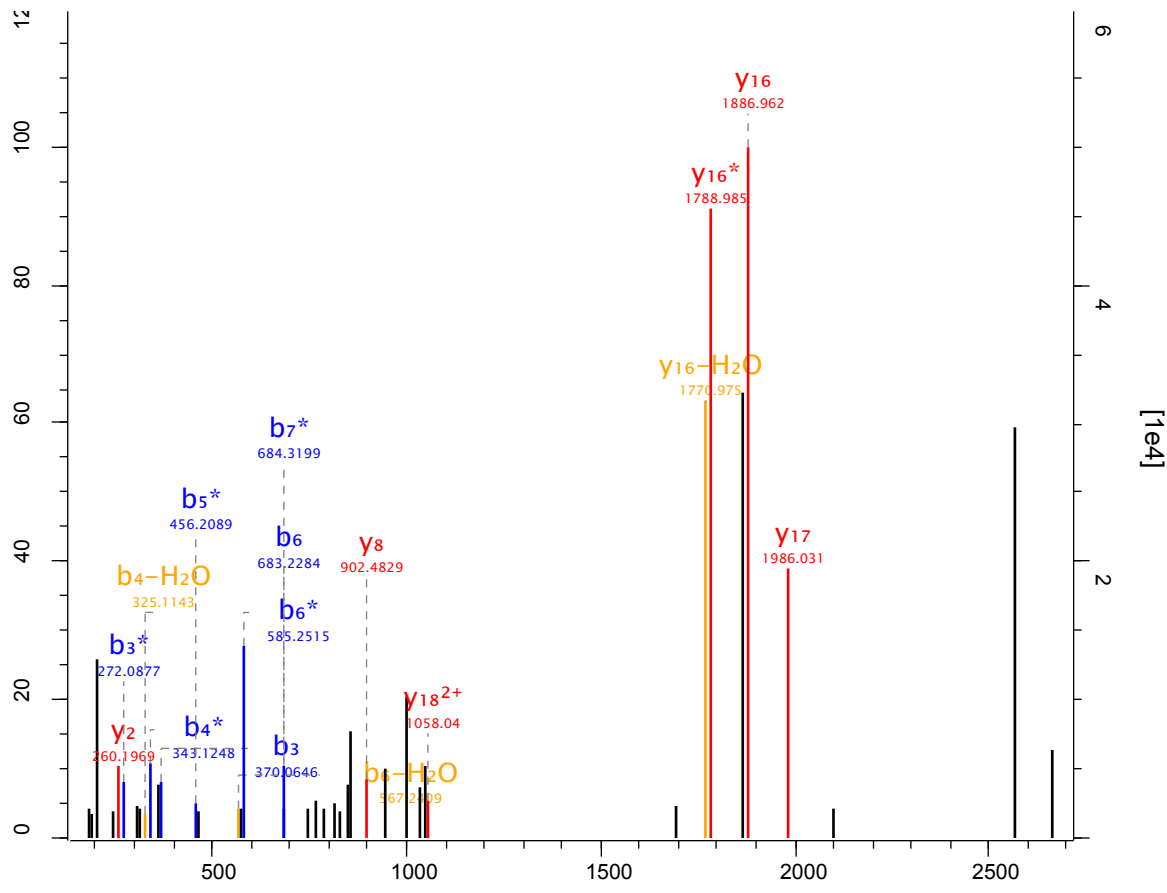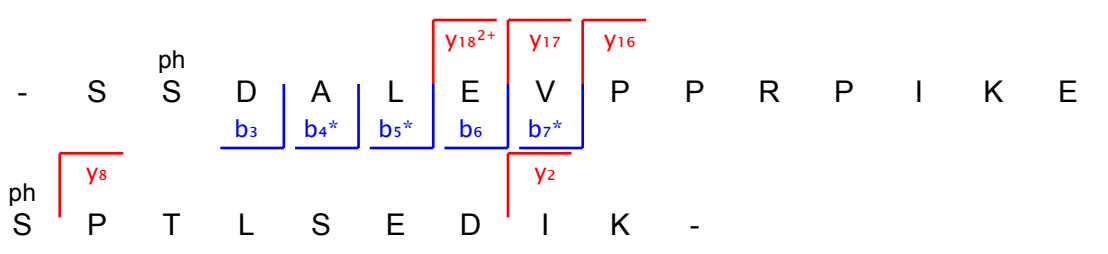

Raw file Scan Method Score m/z  
 Recip\_2\_34\_38 2302 FTMS; HCD 165.9 690.94

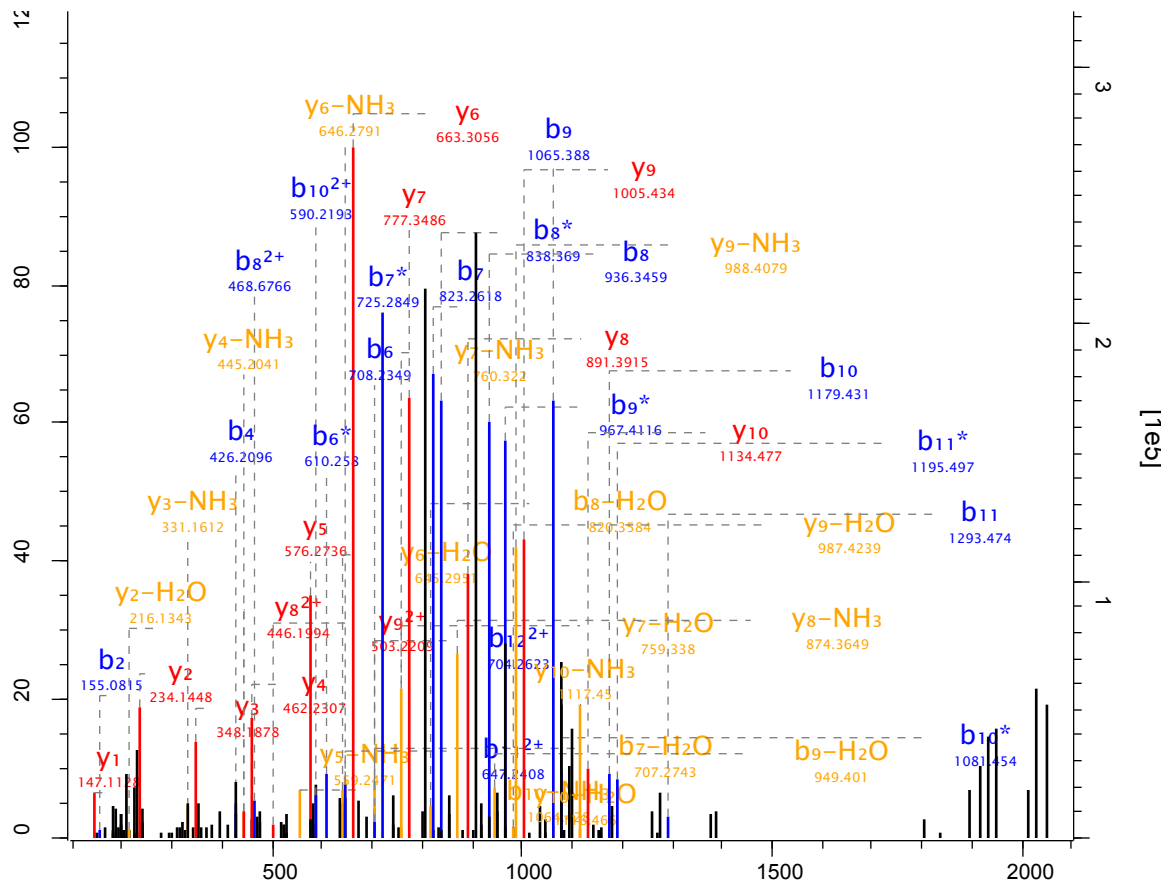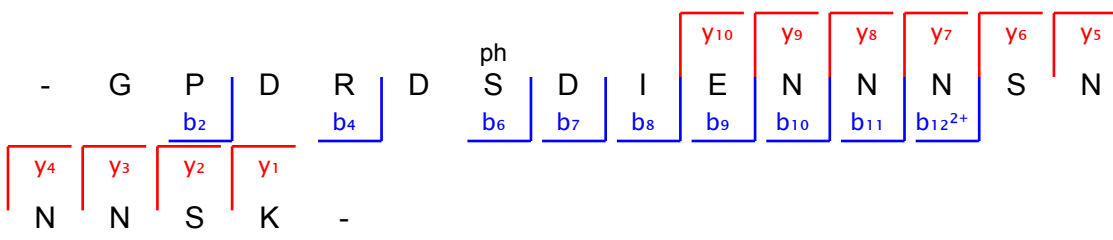

Raw file Scan Method Score m/z  
 Recip\_2\_34\_38 23831 FTMS; HCD 135.62 728.99

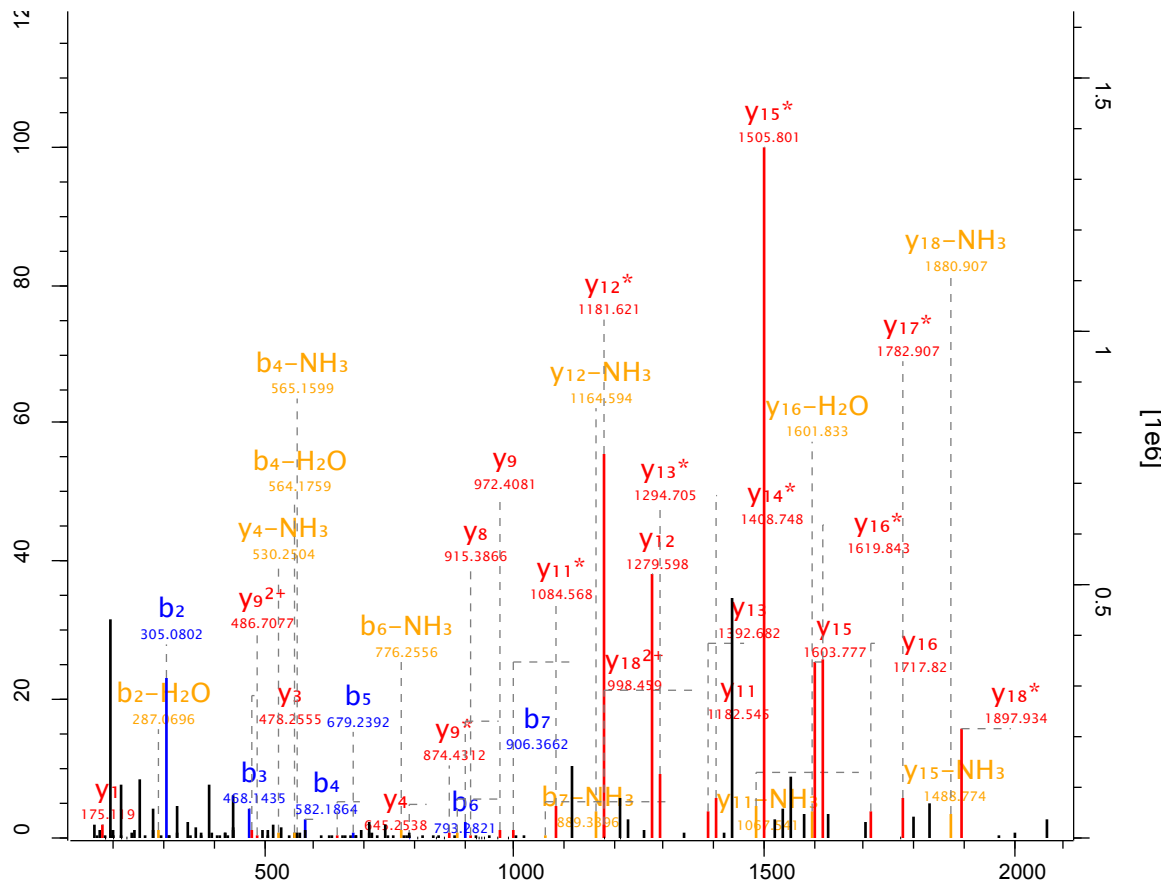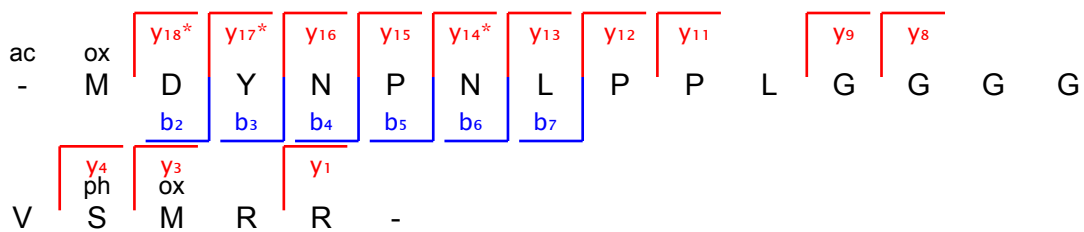

| Raw file      | Scan | Method    | Score | m/z   |
|---------------|------|-----------|-------|-------|
| Recip_2_34_38 | 2394 | FTMS; HCD | 65.22 | 662.3 |

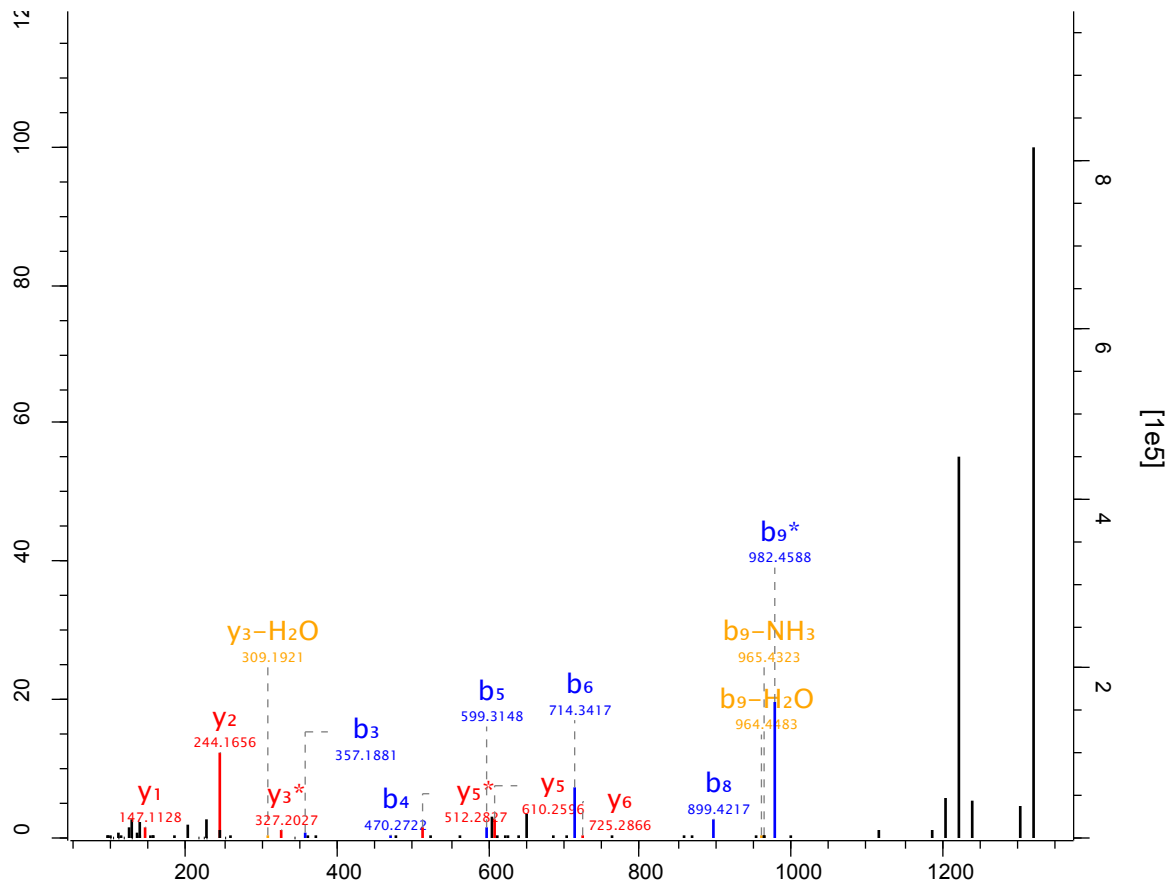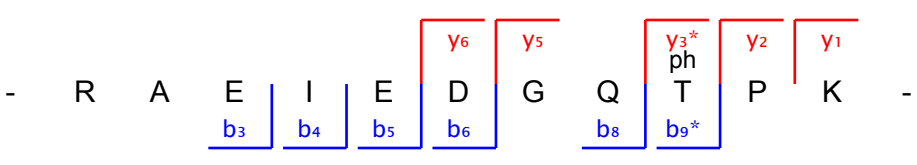

| Raw file      | Scan  | Method    | Score | m/z    |
|---------------|-------|-----------|-------|--------|
| Recip_2_34_38 | 24070 | FTMS; HCD | 43.68 | 591.26 |

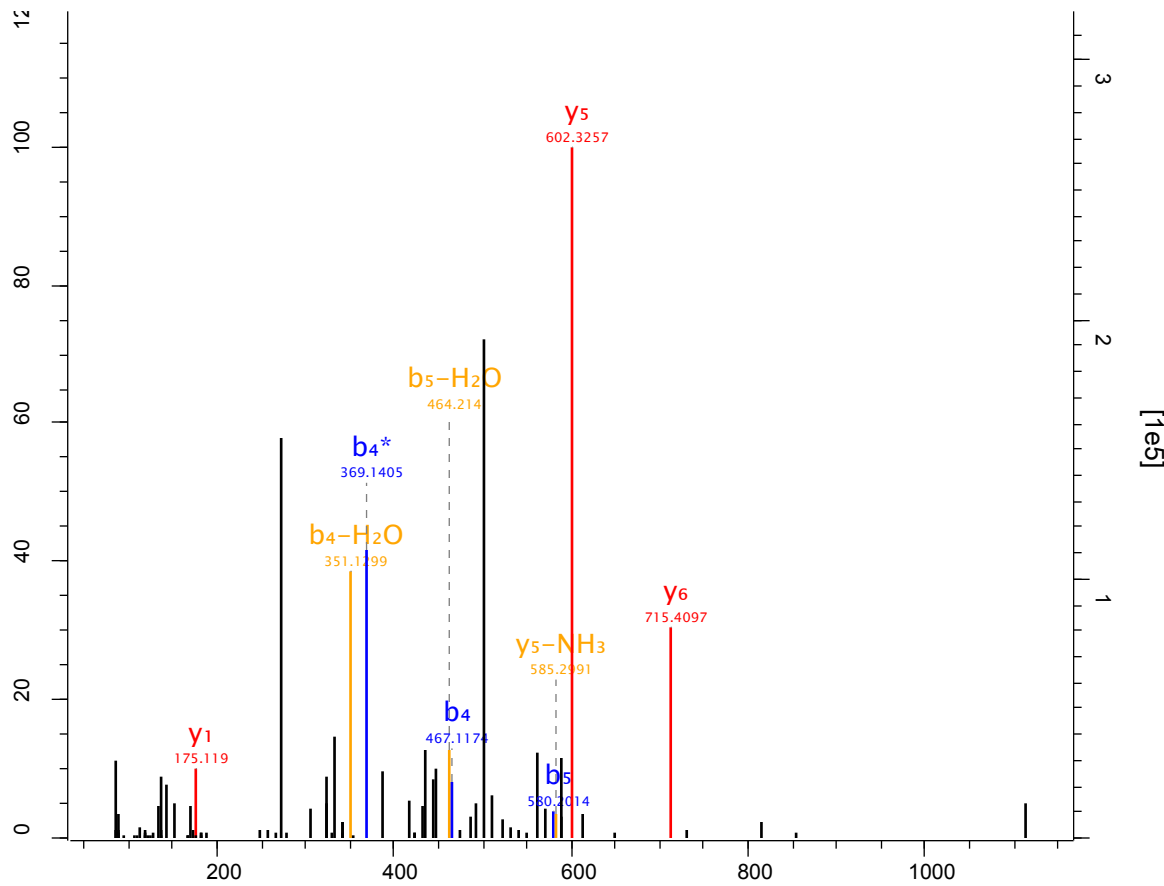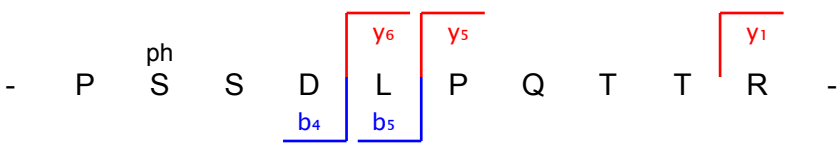

| Raw file      | Scan  | Method    | Score | m/z   |
|---------------|-------|-----------|-------|-------|
| Recip_2_34_38 | 24143 | FTMS; HCD | 56.72 | 867.4 |

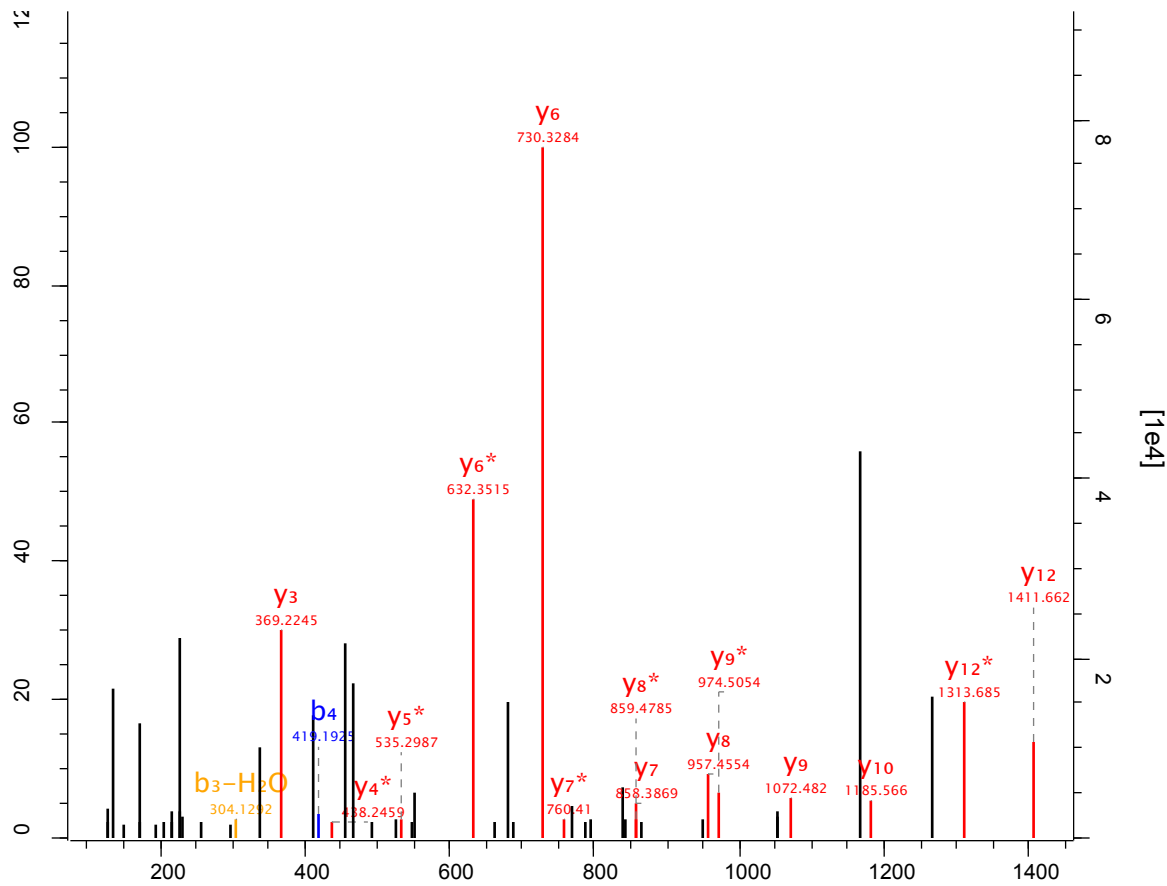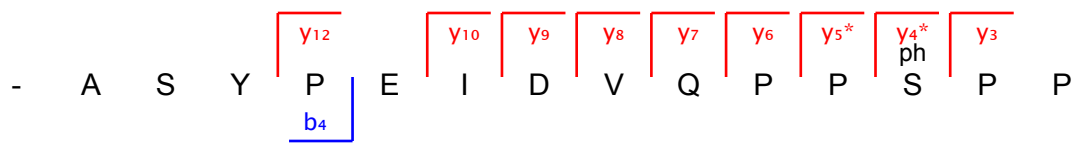

R -



| Raw file      | Scan  | Method    | Score | m/z    |
|---------------|-------|-----------|-------|--------|
| Recip_2_34_38 | 24161 | FTMS; HCD | 52.86 | 723.35 |

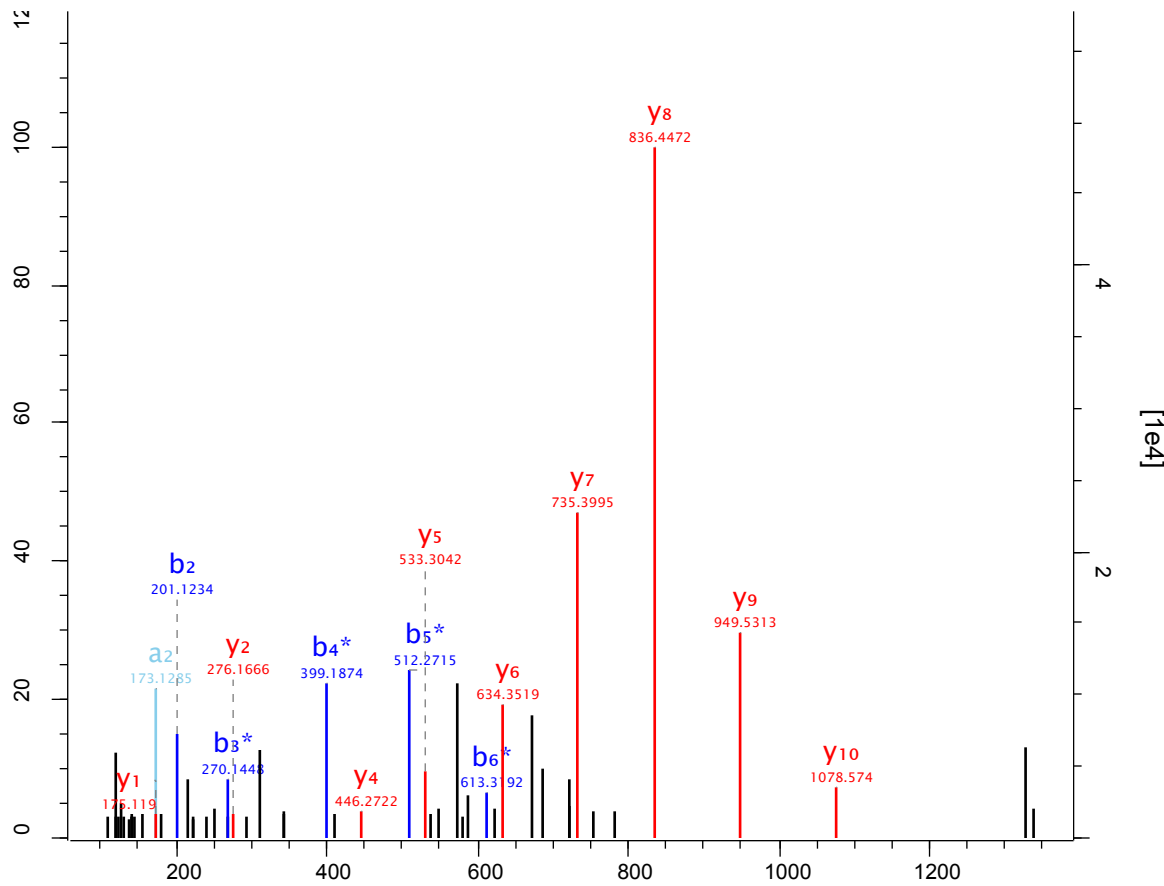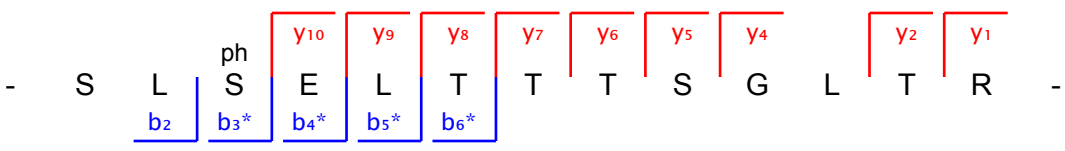

Raw file Scan Method Score m/z  
 Recip\_2\_34\_38 25379 FTMS; HCD 46.32 818.33

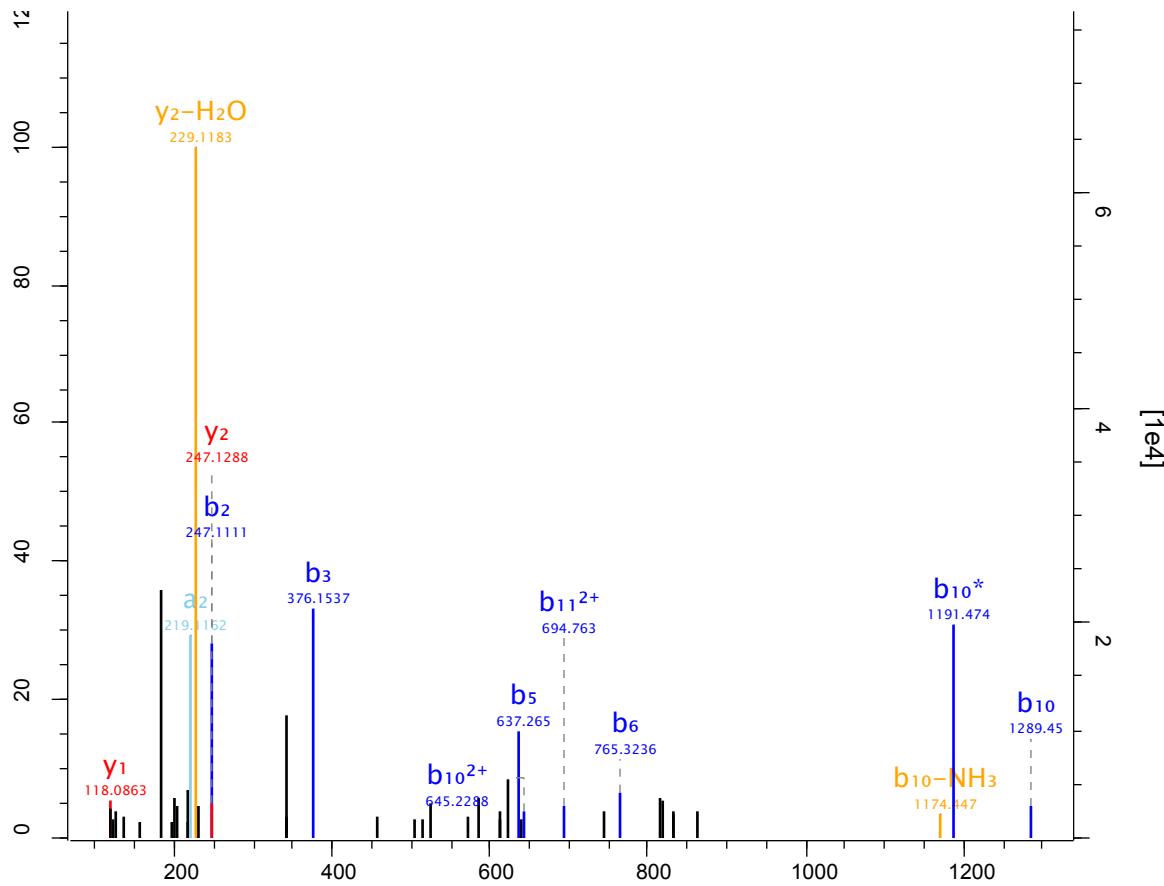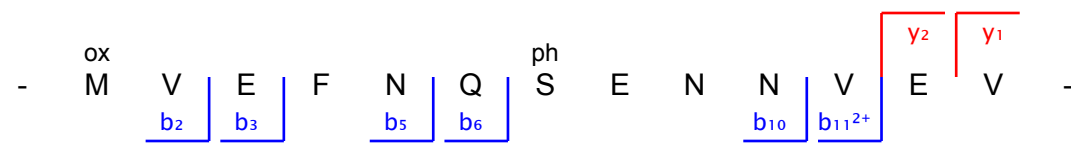

| Raw file      | Scan  | Method    | Score  | m/z    |
|---------------|-------|-----------|--------|--------|
| Recip_2_34_38 | 25503 | FTMS; HCD | 104.88 | 898.91 |

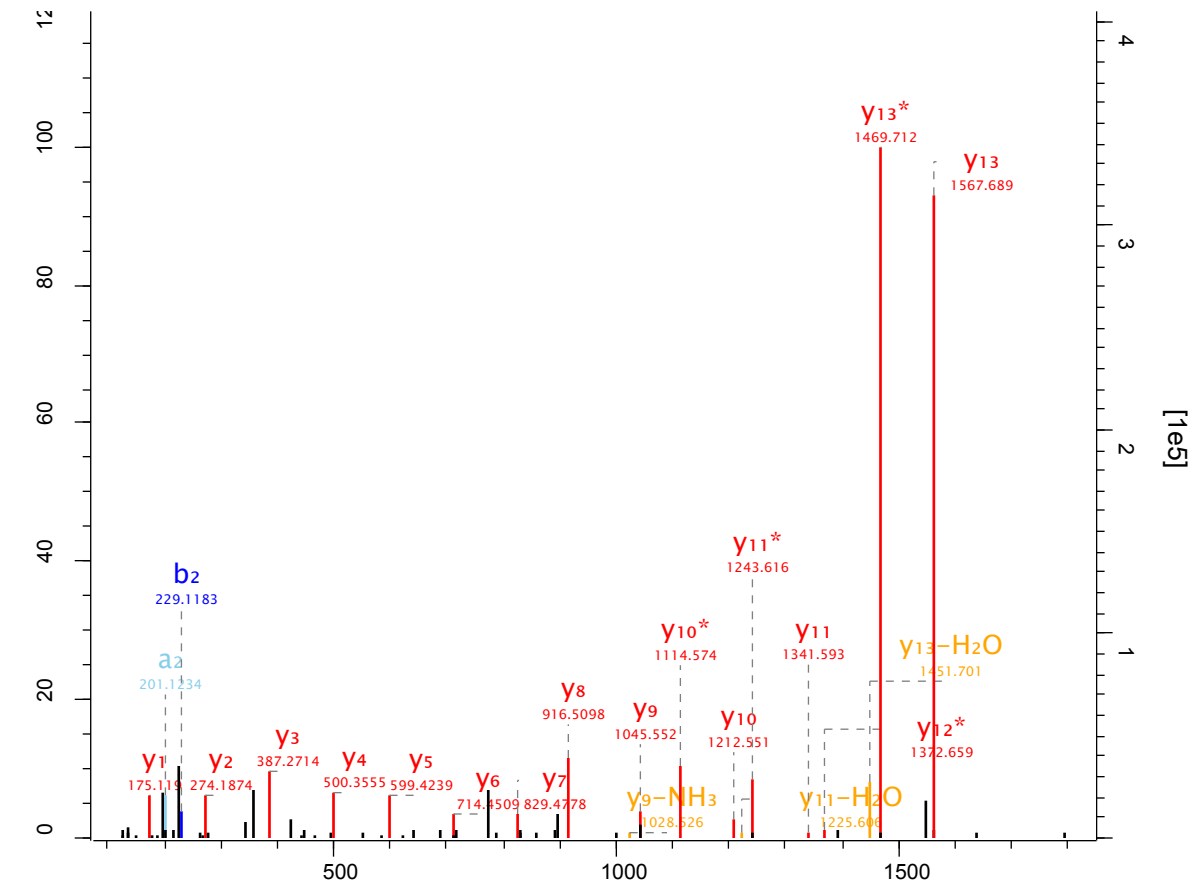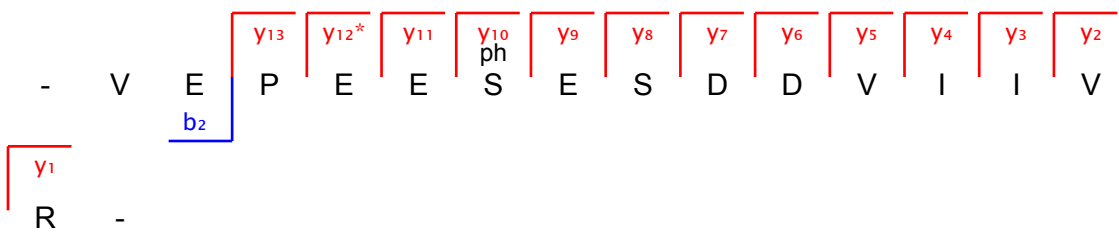

Raw file Scan Method Score m/z  
 Recip\_2\_34\_38 26154 FTMS; HCD 144.17 777.41

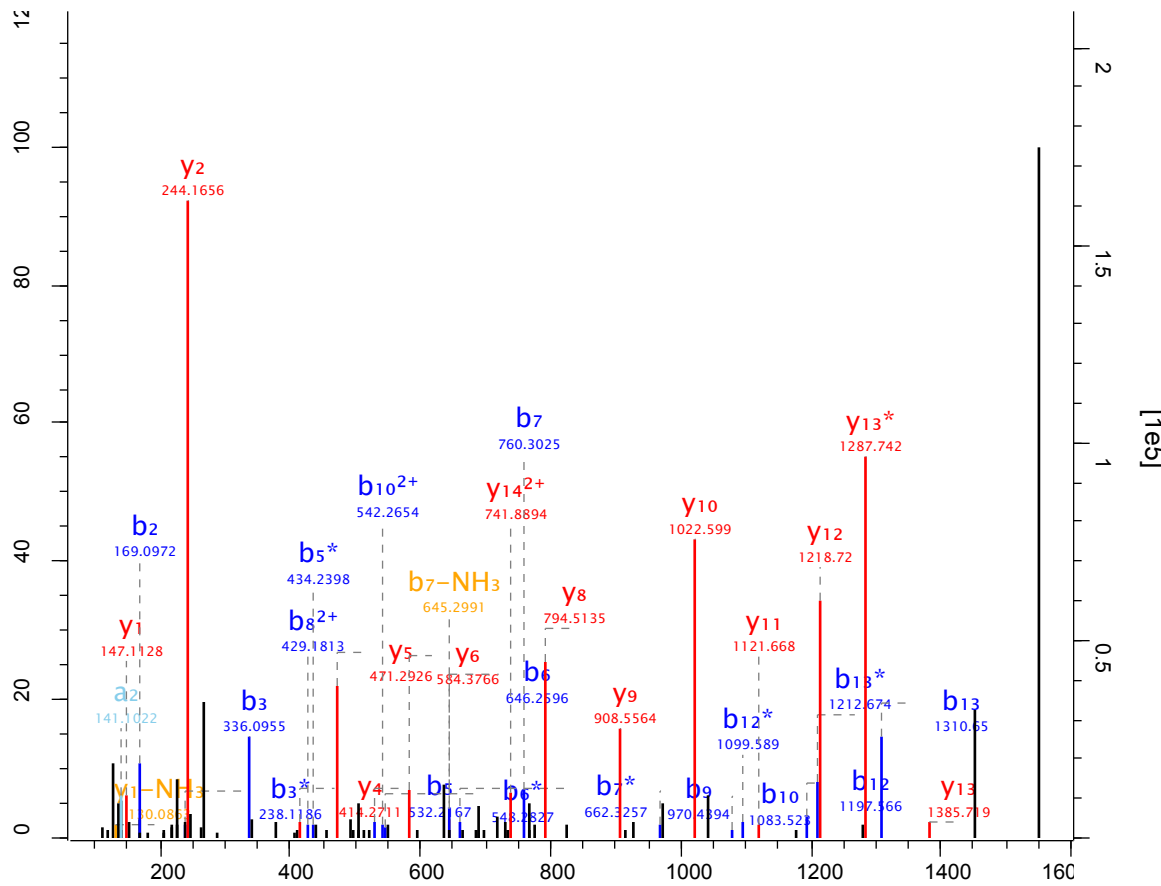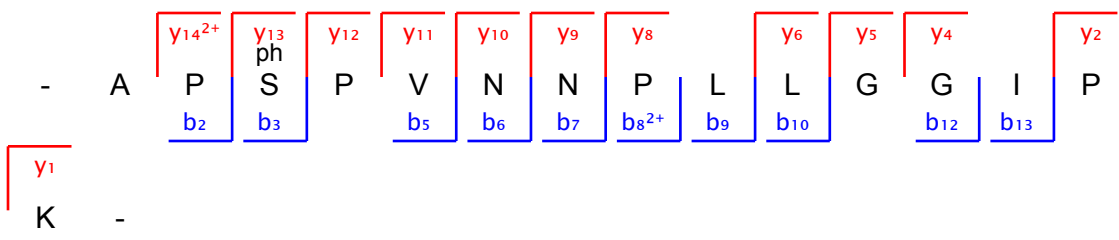

Raw file Scan Method Score m/z  
 Recip\_2\_34\_38 2625 FTMS; HCD 134.25 684.28

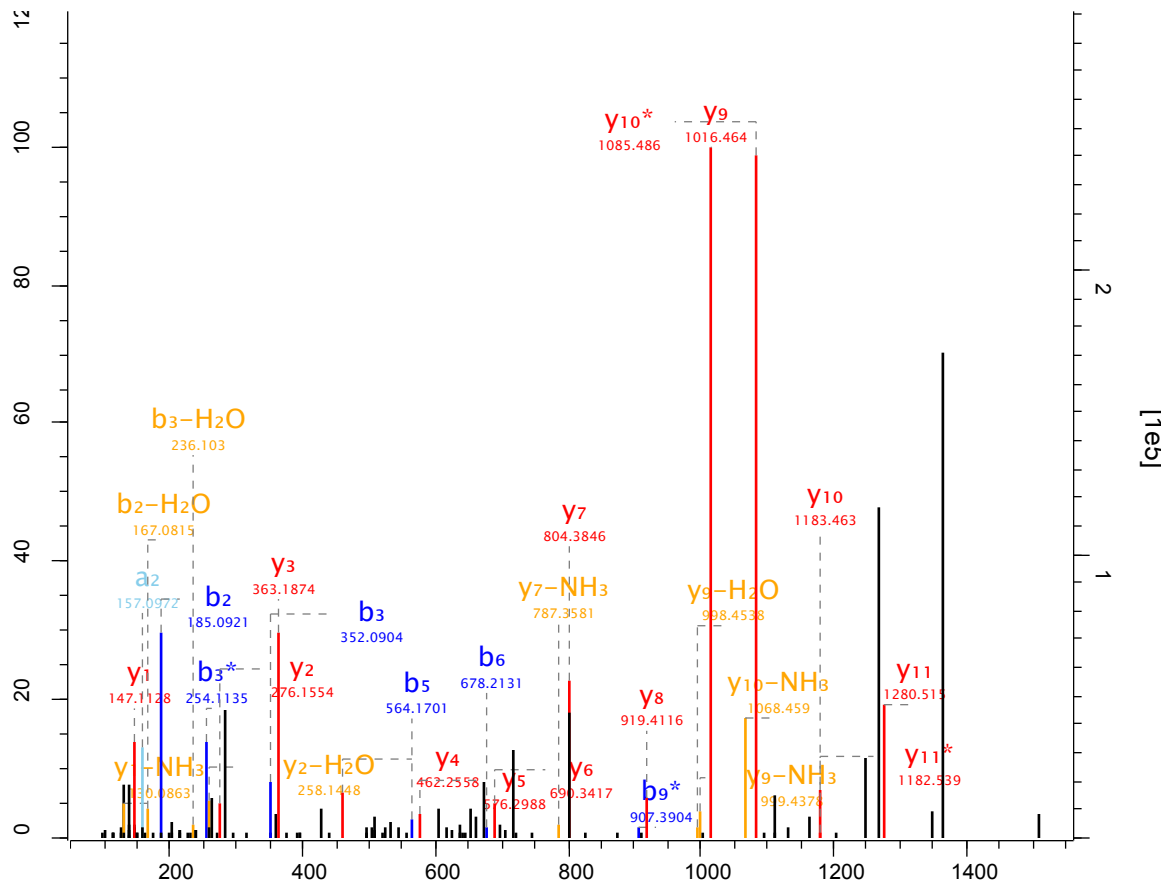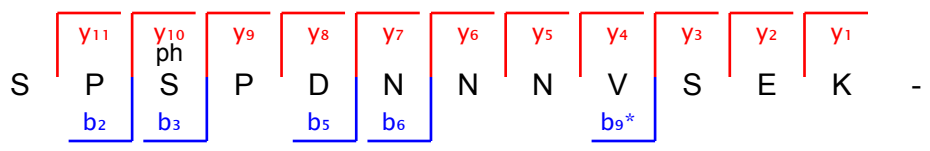

Raw file Scan Method Score m/z  
 Recip\_2\_34\_38 2681 FTMS; HCD 255.2 737.3

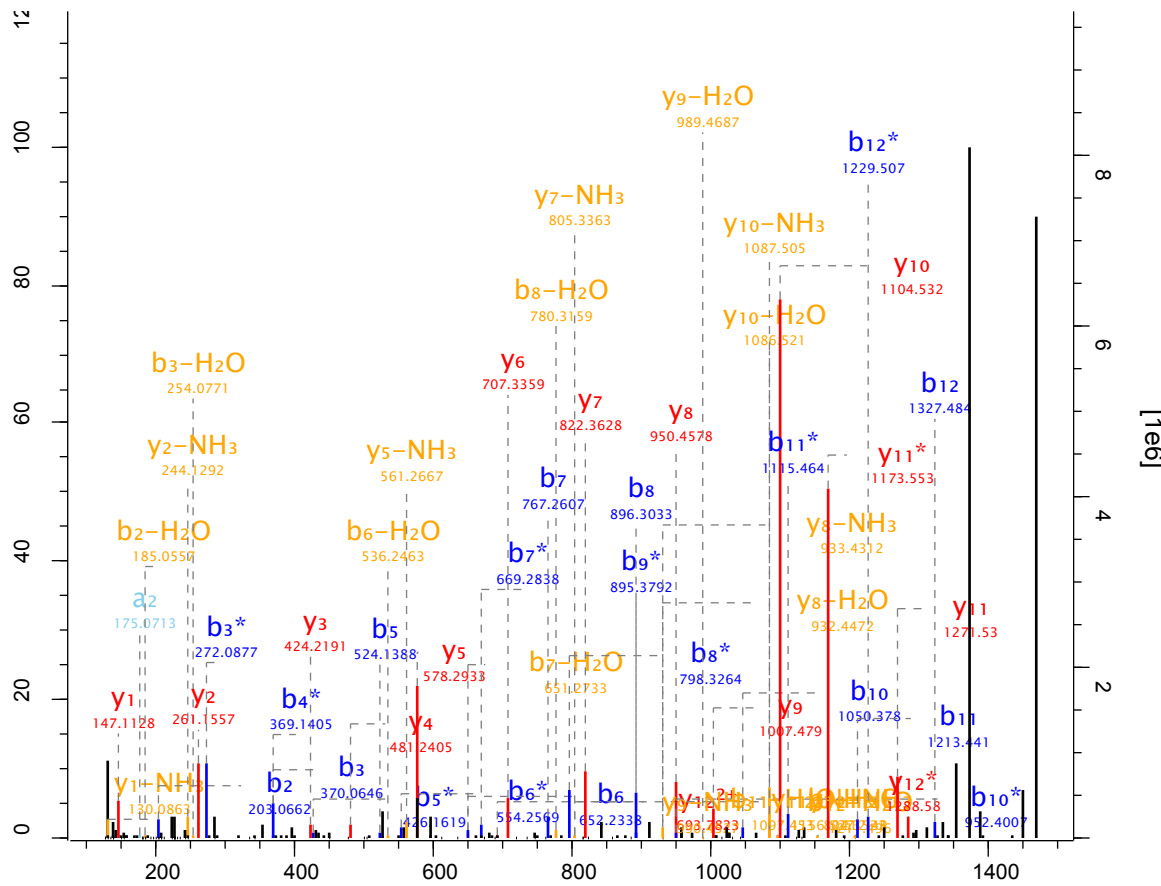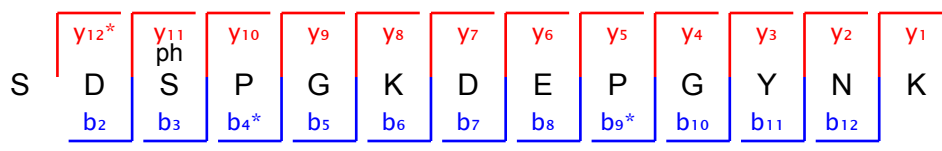

Raw file Scan Method Score m/z  
 Recip\_2\_34\_38 26992 FTMS; HCD 54.83 770.71

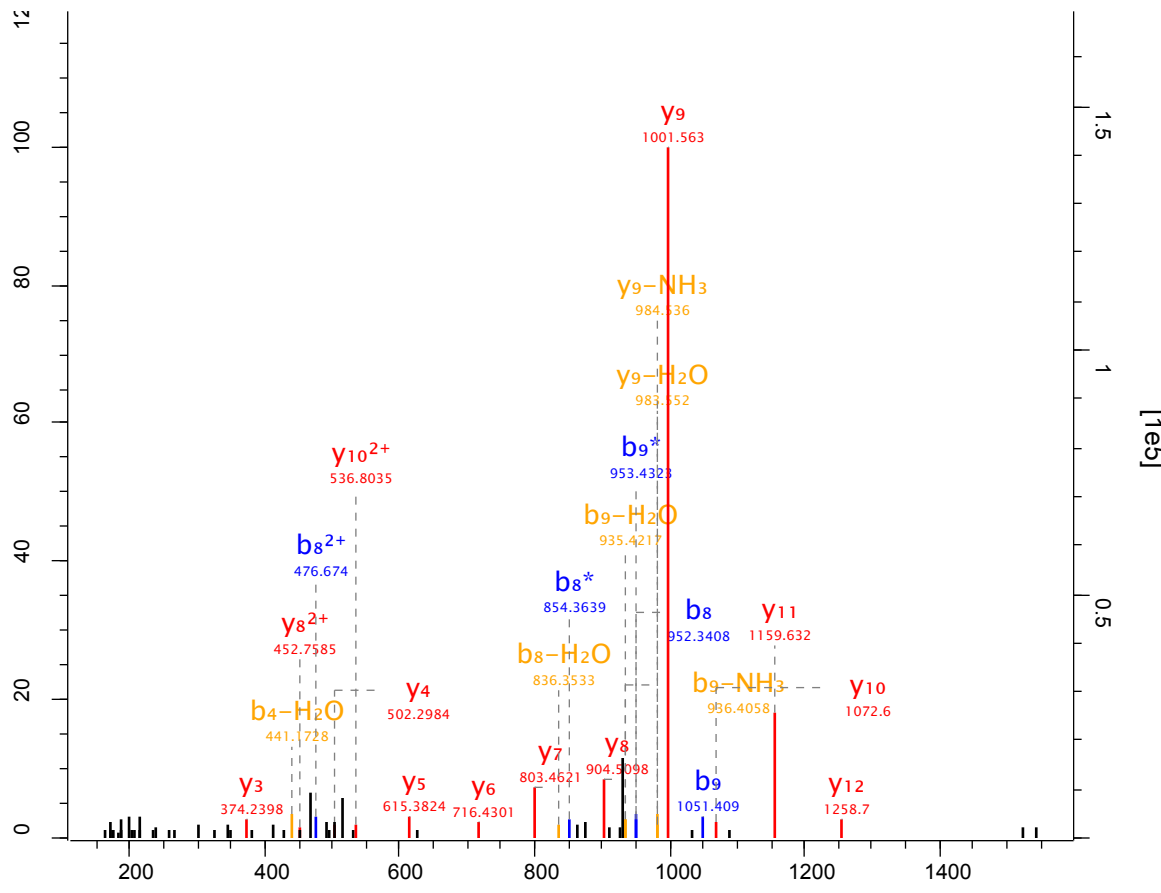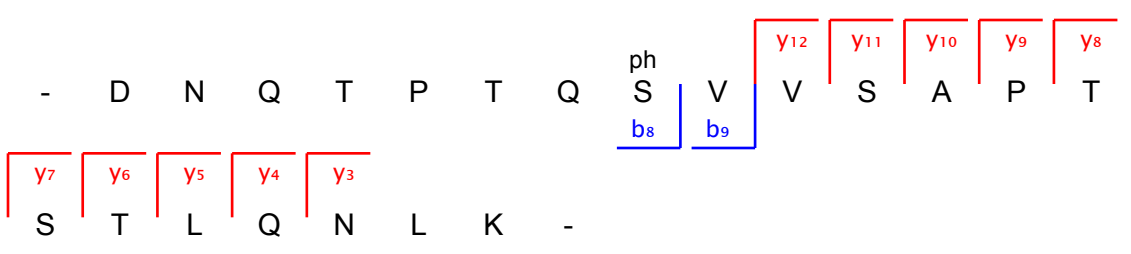

Raw file Scan Method Score m/z  
 Recip\_2\_34\_38 2739 FTMS; HCD 149.94 500.71

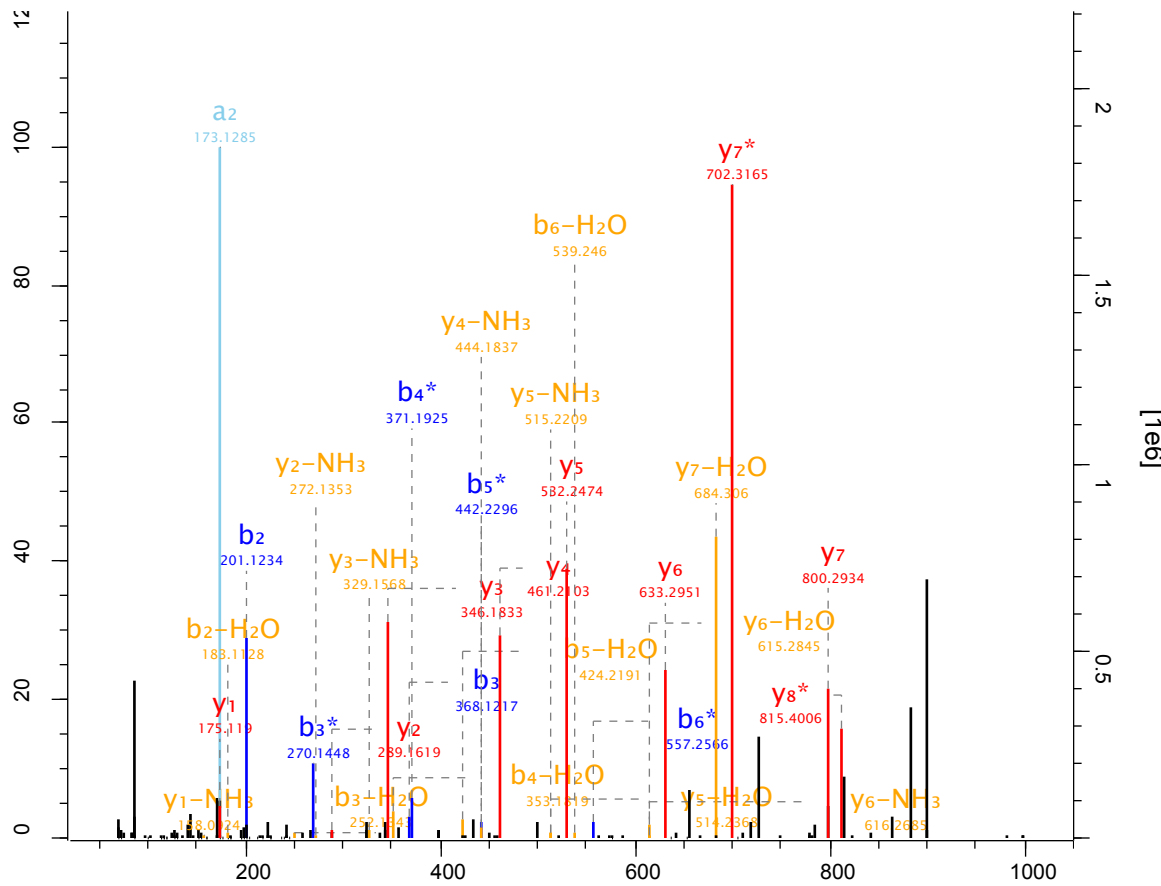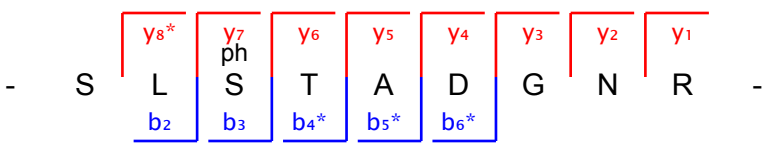



Raw file Scan Method Score m/z  
 Recip\_2\_34\_38 2750 FTMS; HCD 65.1 536.91

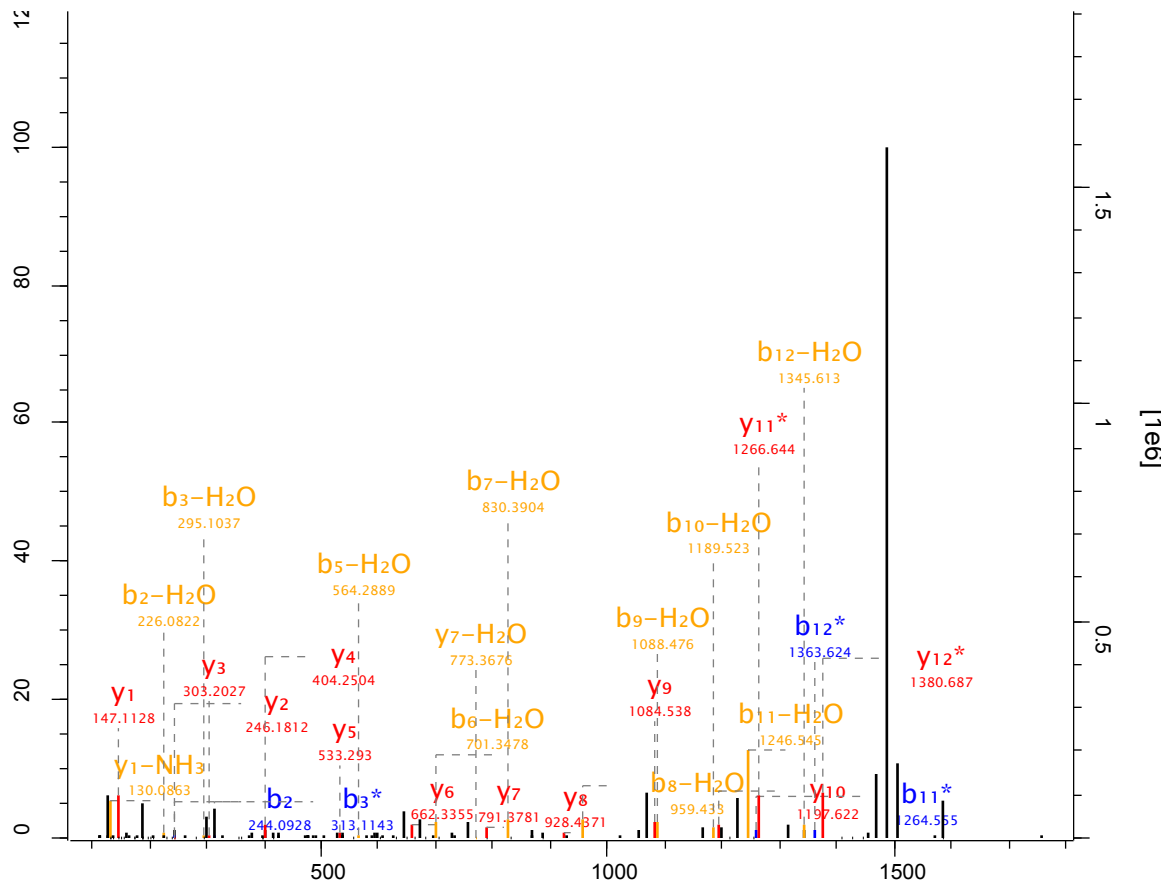

500 1000 1500

[1e6]

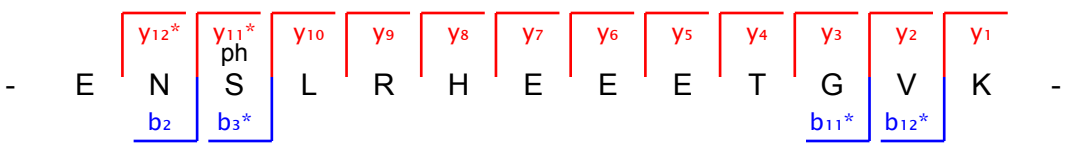

Raw file Scan Method Score m/z  
 Recip\_2\_34\_38 2764 FTMS; HCD 108.45 784.3

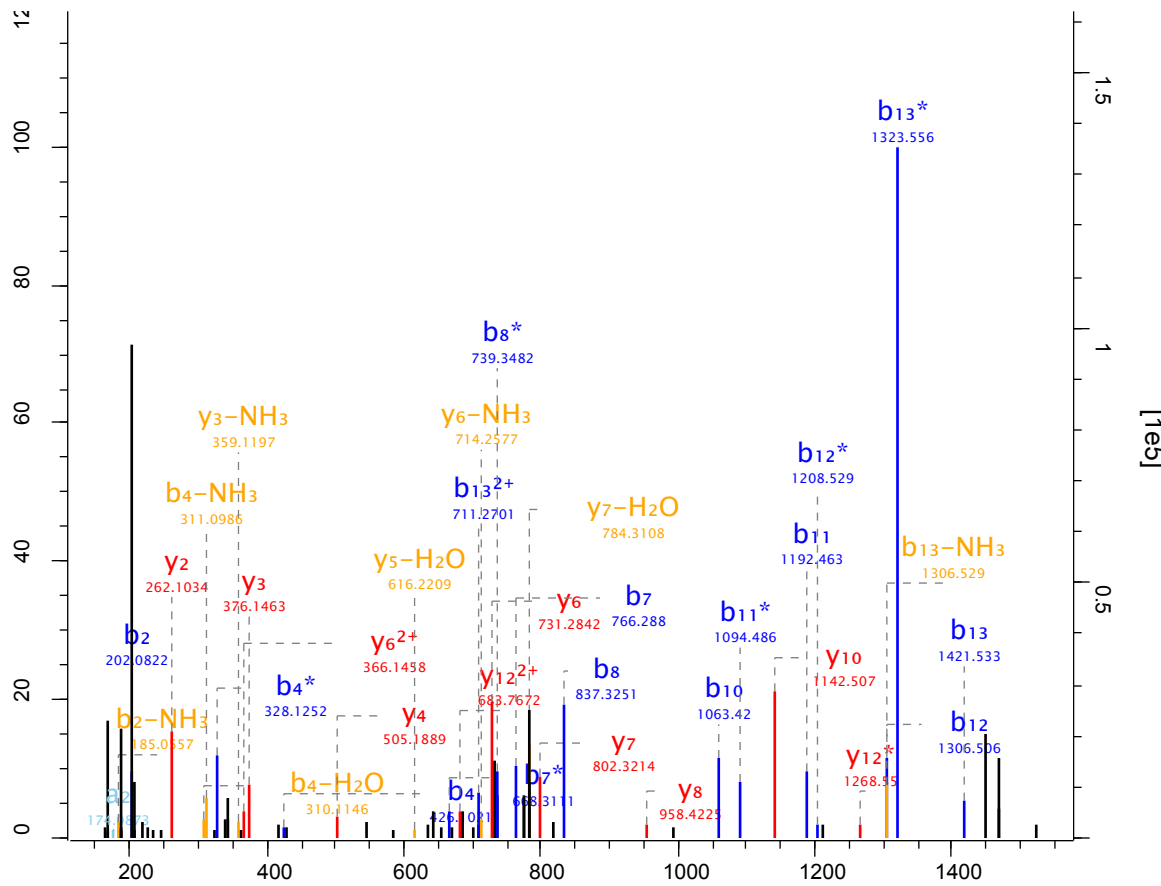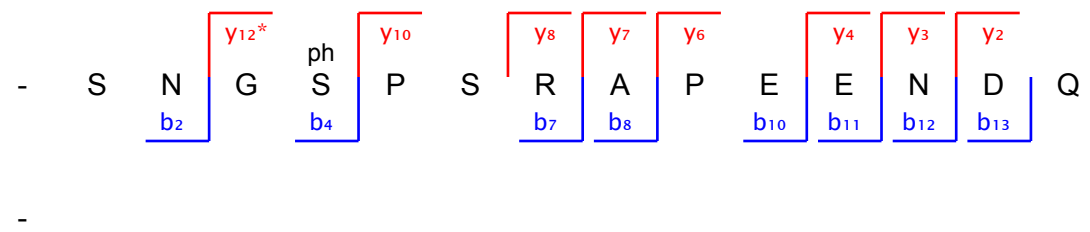

| Raw file      | Scan  | Method    | Score | m/z    |
|---------------|-------|-----------|-------|--------|
| Recip_2_34_38 | 27734 | FTMS; HCD | 43.03 | 671.78 |

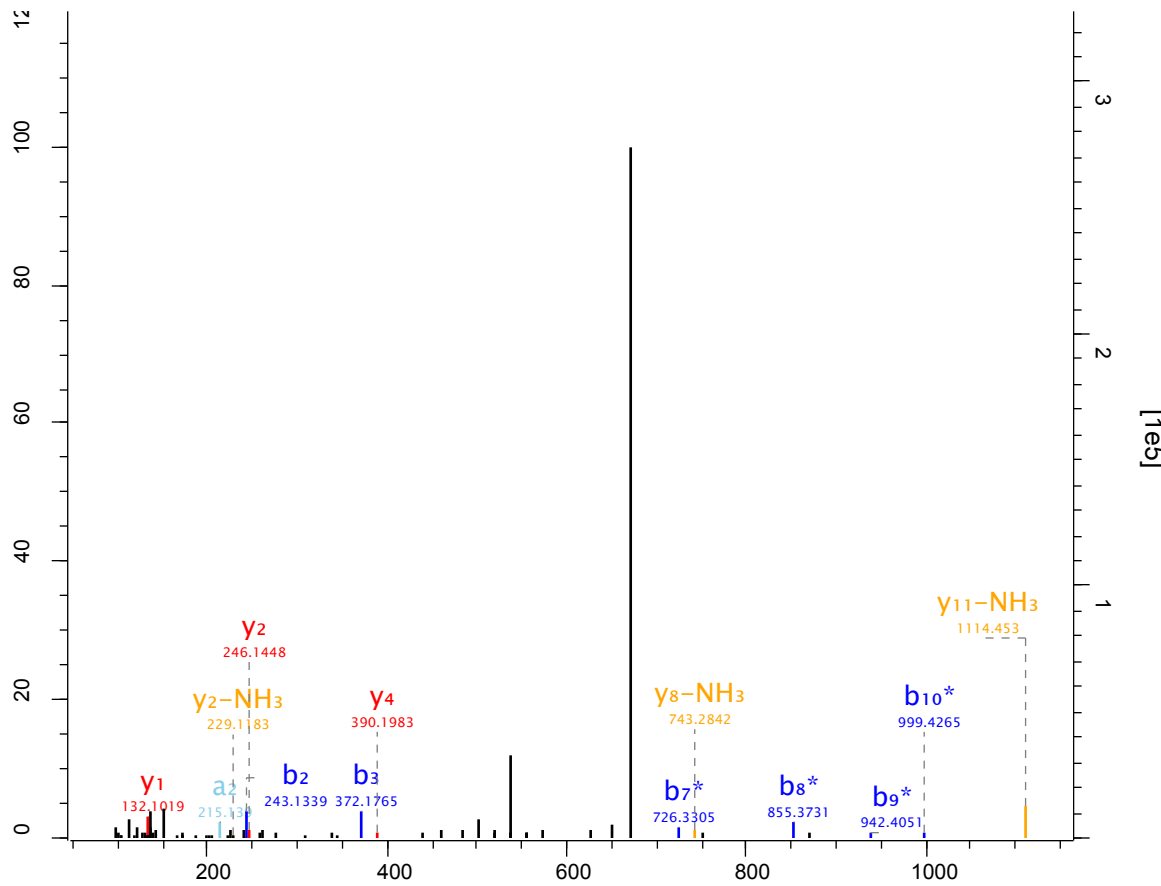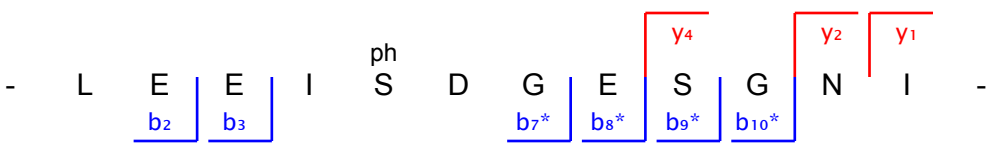

| Raw file      | Scan | Method    | Score | m/z    |
|---------------|------|-----------|-------|--------|
| Recip_2_34_38 | 2790 | FTMS; HCD | 42.58 | 546.59 |

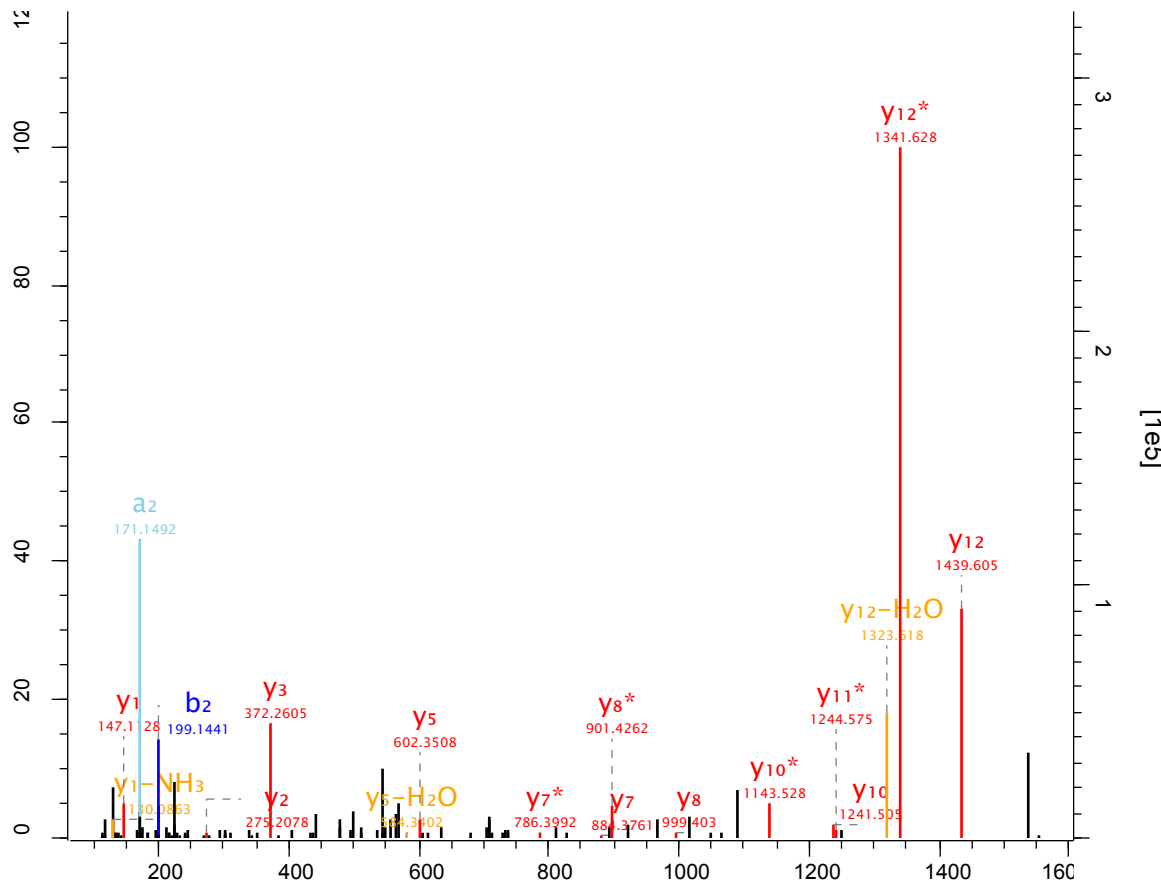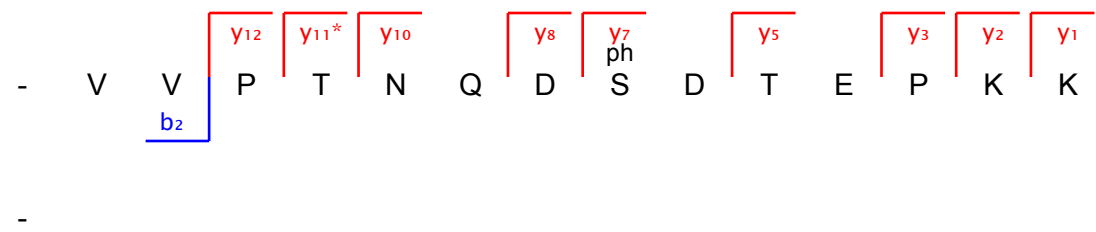

Raw file Scan Method Score m/z  
 Recip\_2\_34\_38 2848 FTMS; HCD 159 717.77

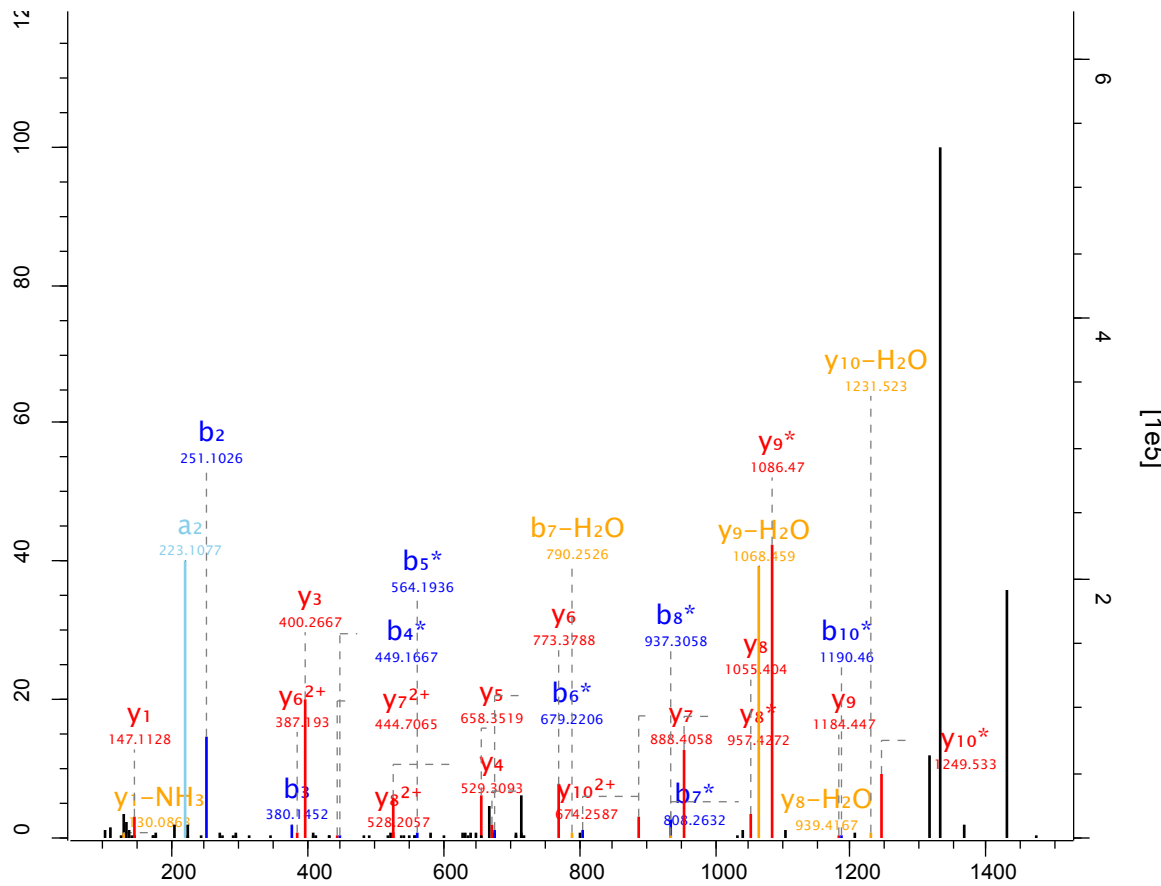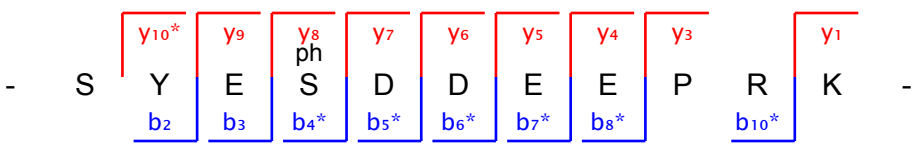



Raw file Scan Method Score m/z  
 Recip\_2\_34\_38 28665 FTMS; HCD 209.18 890.42

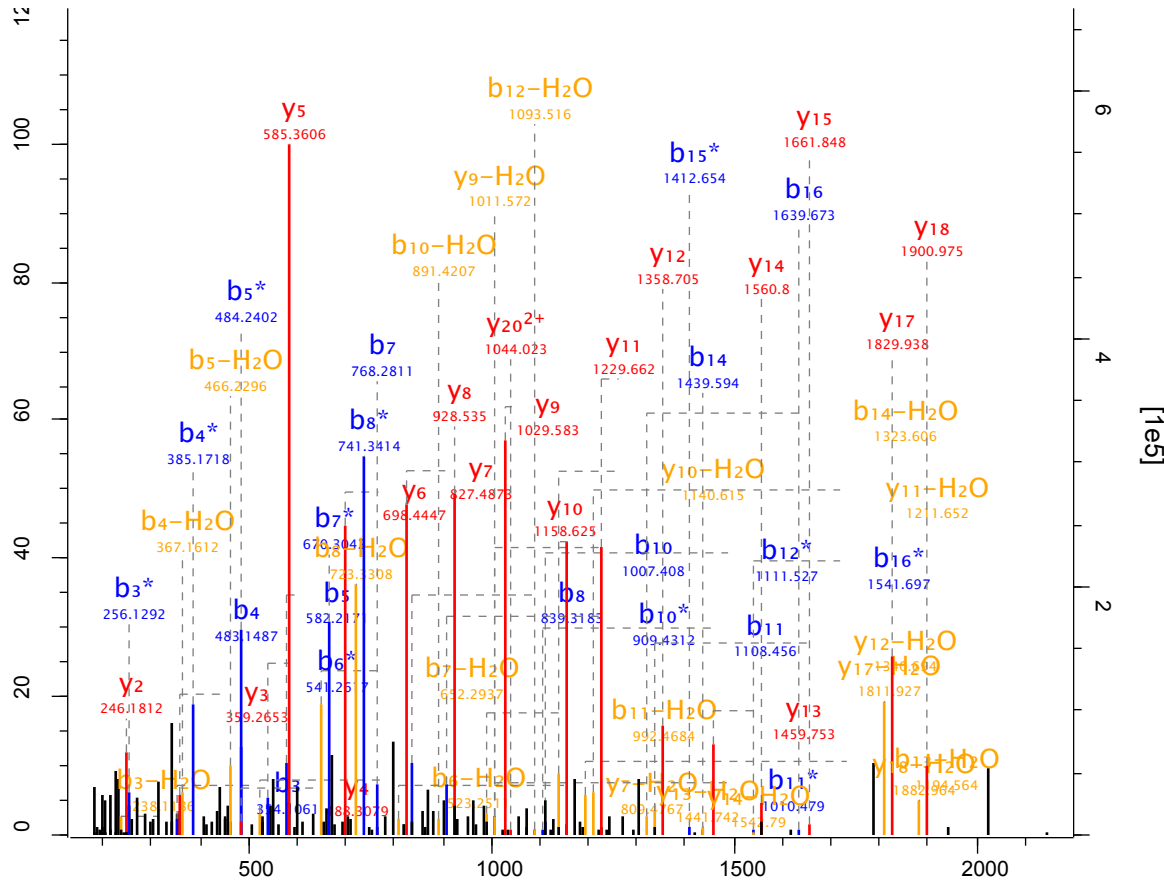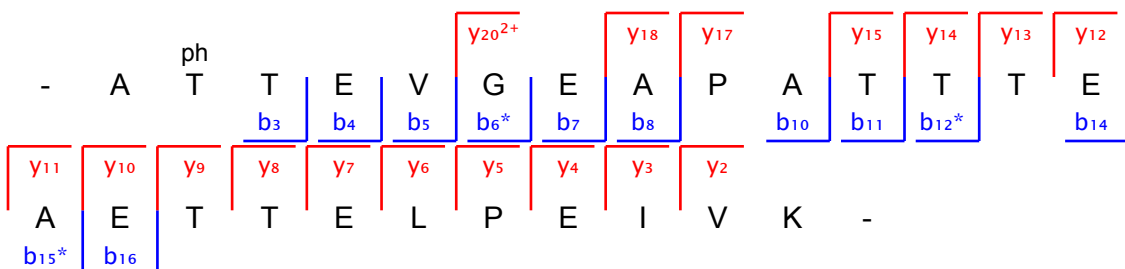

Raw file Scan Method Score m/z  
 Recip\_2\_34\_38 28847 FTMS; HCD 101.04 797.05

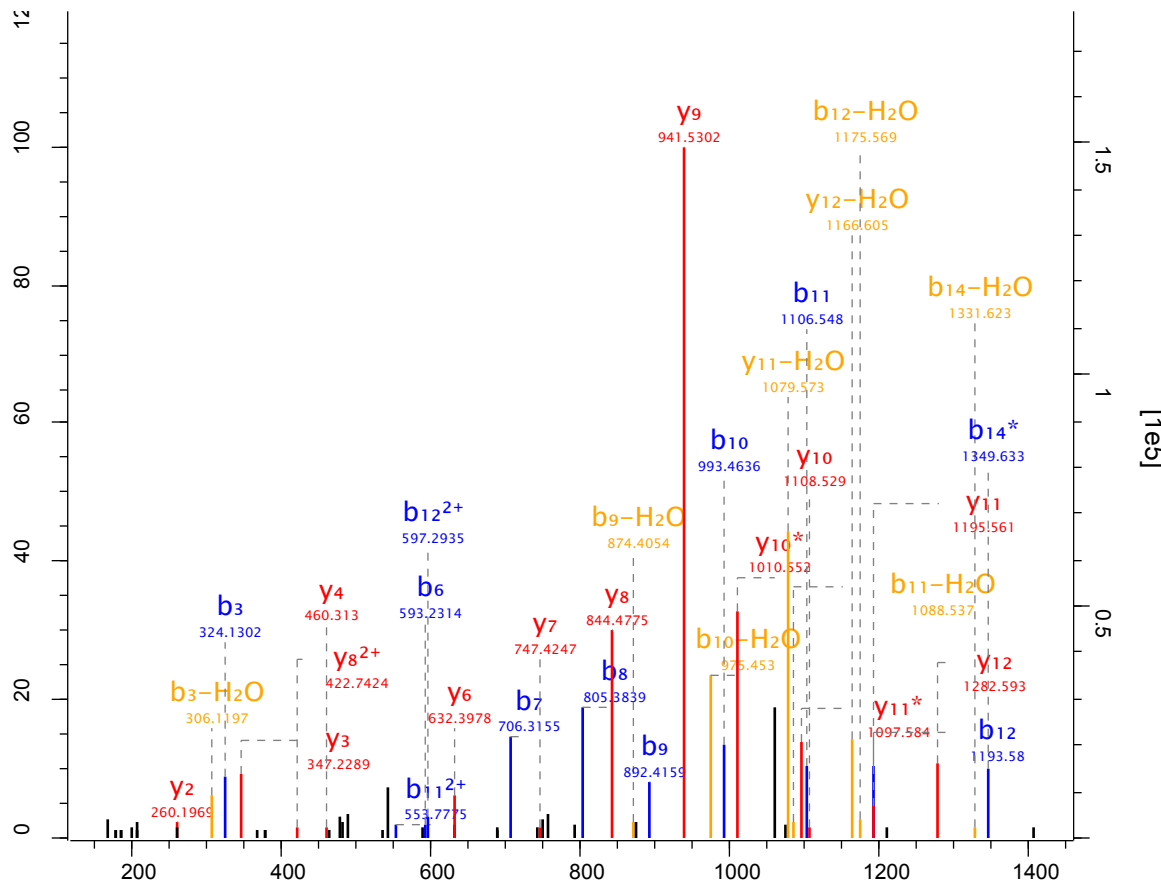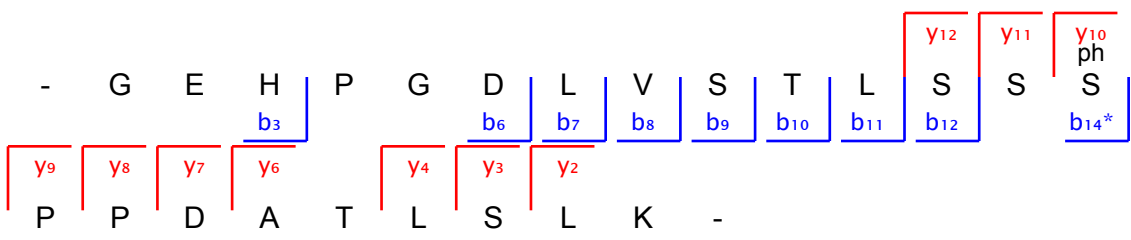



Raw file Scan Method Score m/z  
 Recip\_2\_34\_38 29066 FTMS; HCD 194.23 690.81

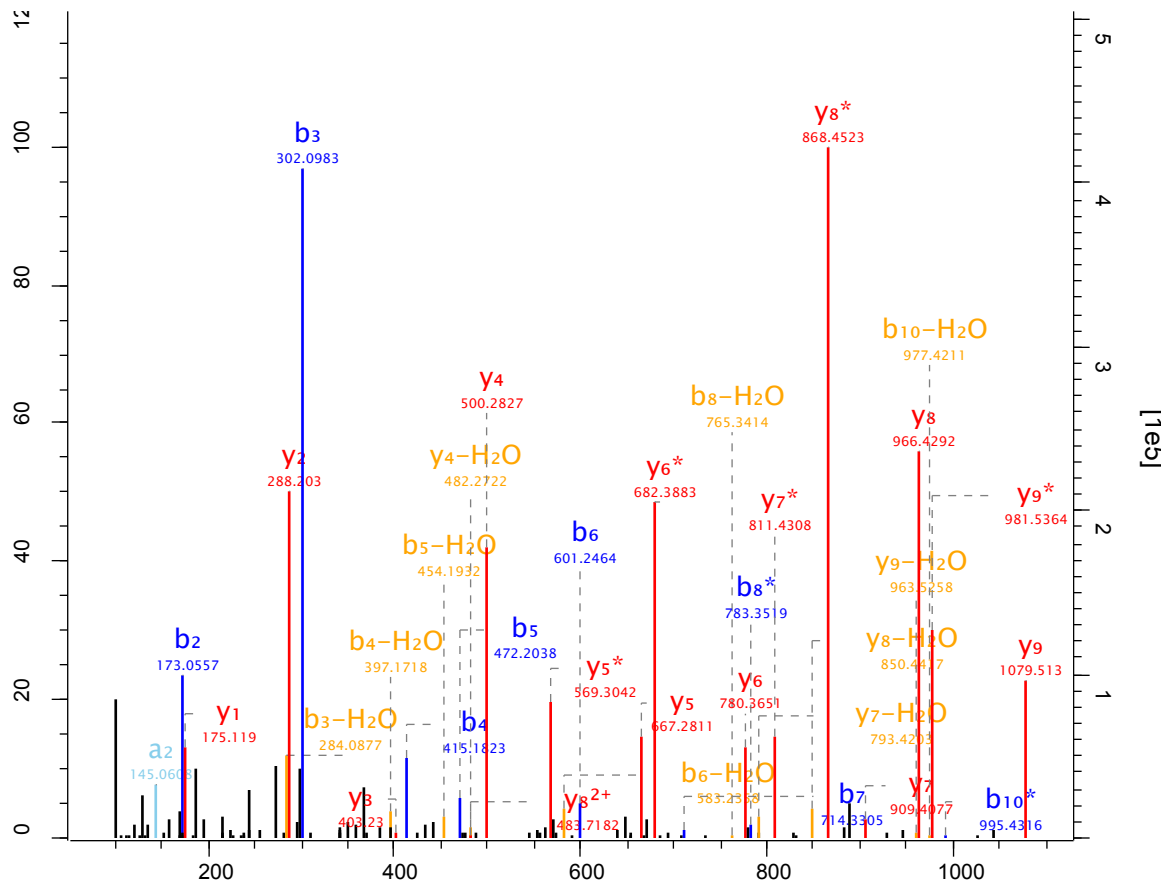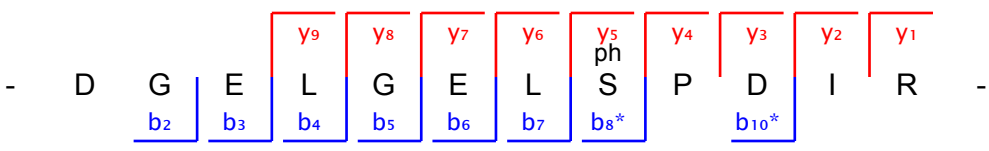

Raw file Scan Method Score m/z  
 Recip\_2\_34\_38 2912 FTMS; HCD 102.73 626.27

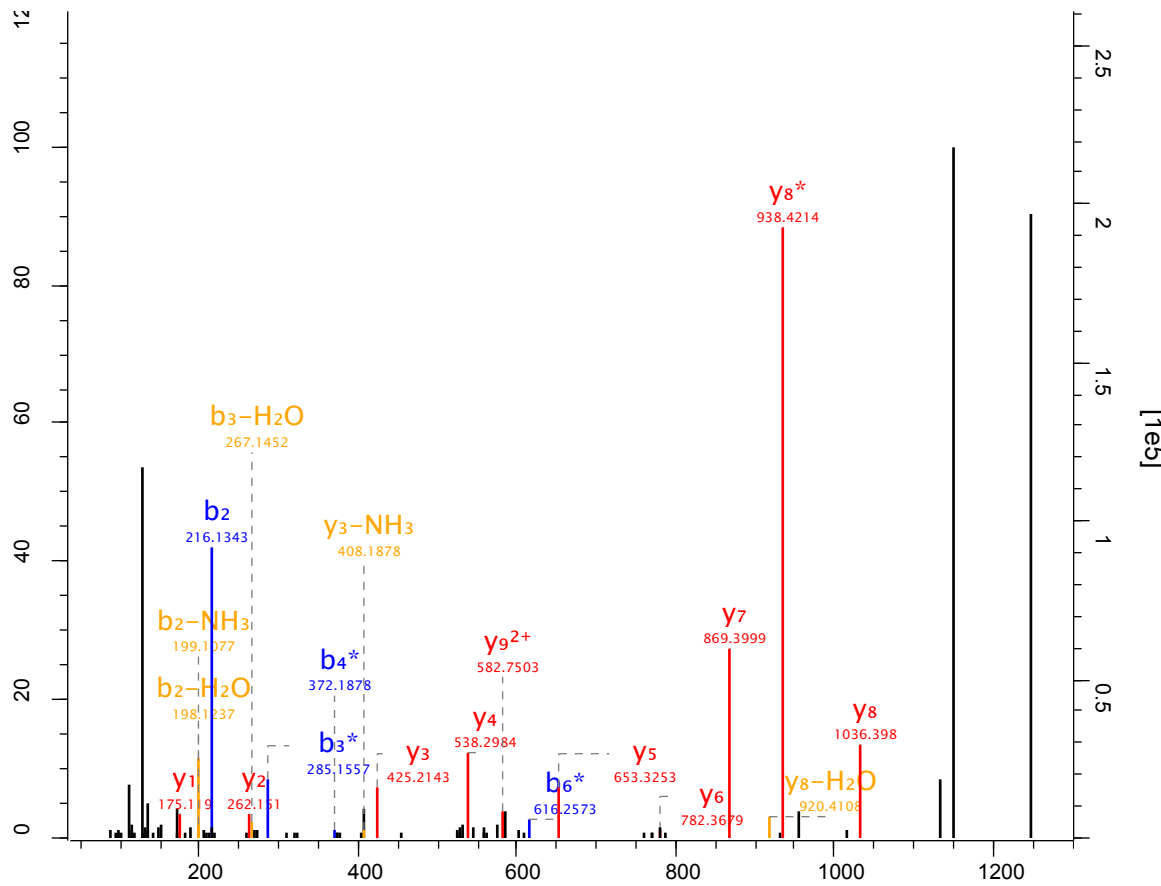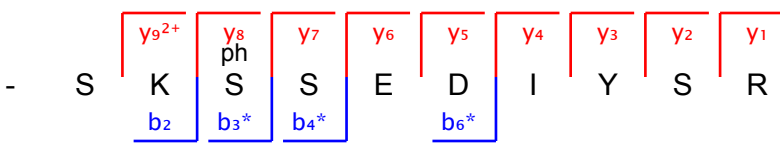

Raw file Scan Method Score m/z  
 Recip\_2\_34\_38 29503 FTMS; HCD 80.63 669.86

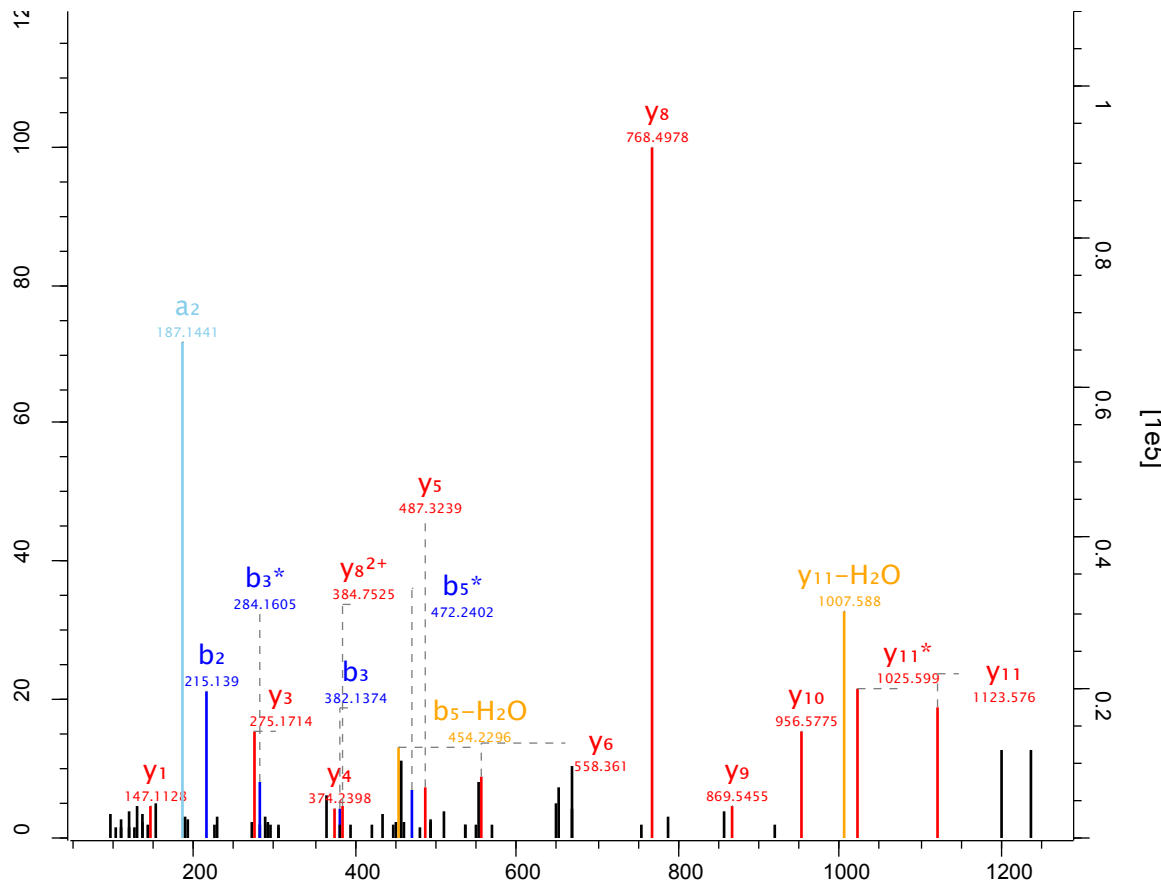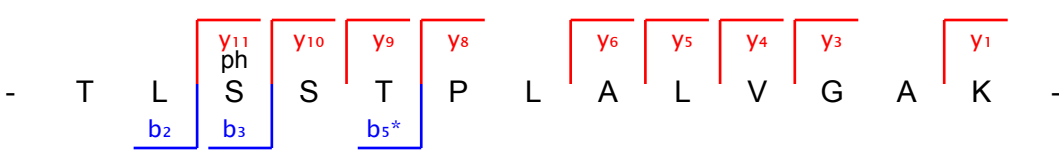

Raw file Scan Method Score m/z  
 Recip\_2\_34\_38 29591 FTMS; HCD 127.14 712.59

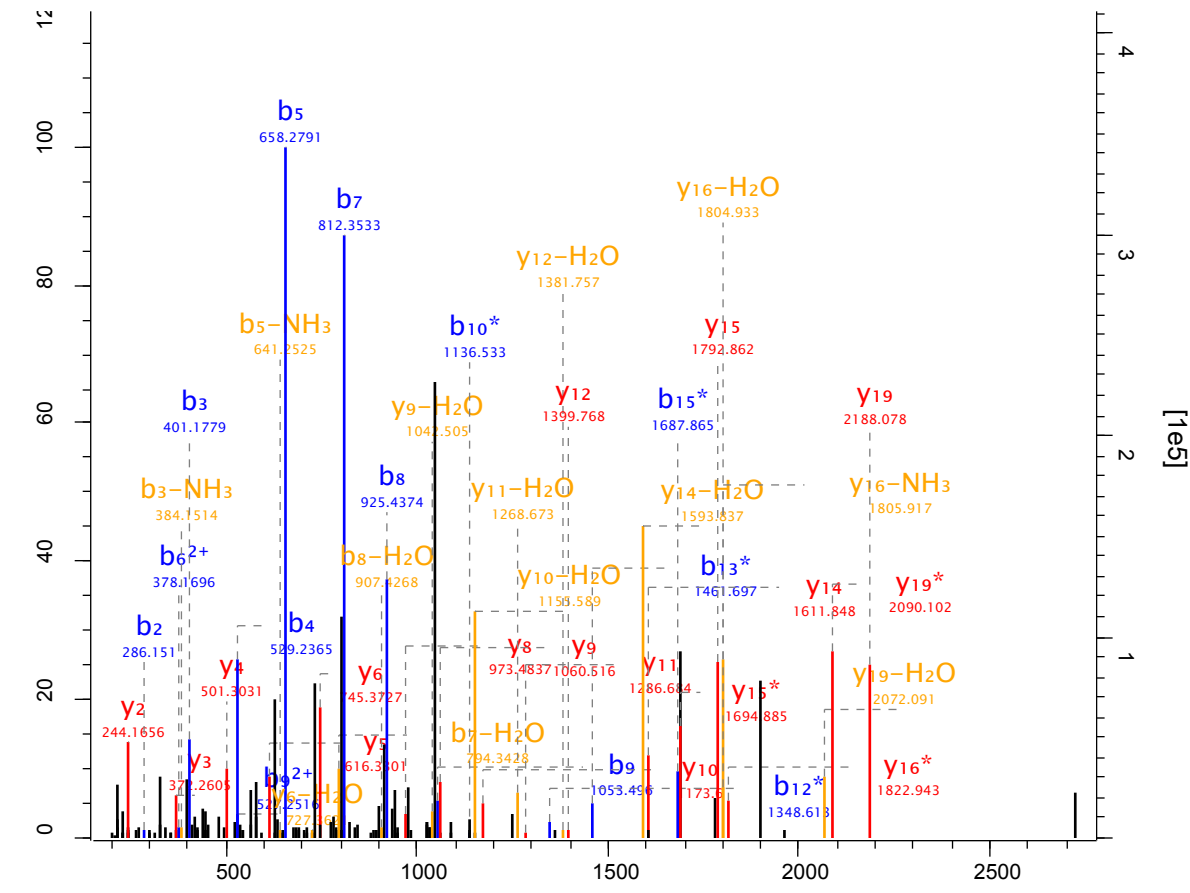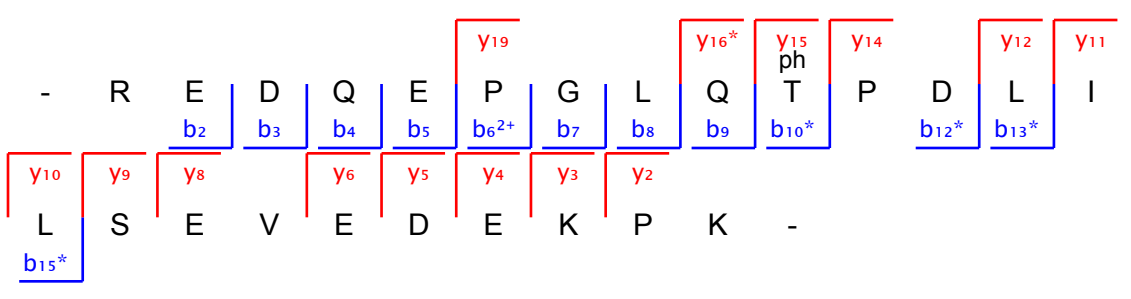

| Raw file      | Scan | Method    | Score | m/z   |
|---------------|------|-----------|-------|-------|
| Recip_2_34_38 | 2974 | FTMS; HCD | 65.63 | 493.7 |

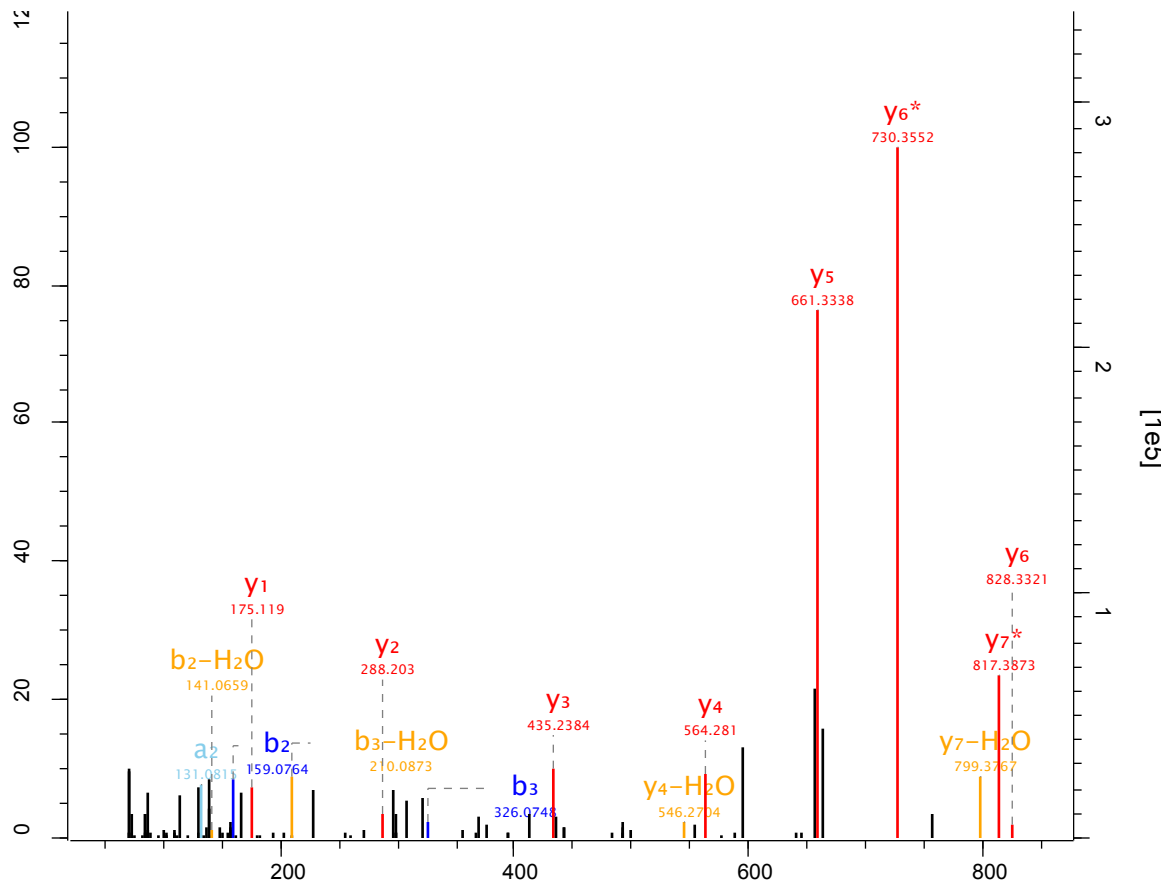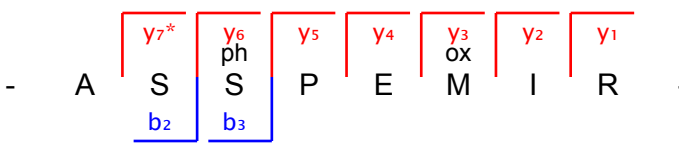

Raw file Scan Method Score m/z  
 Recip\_2\_34\_38 29790 FTMS; HCD 112.17 735.34

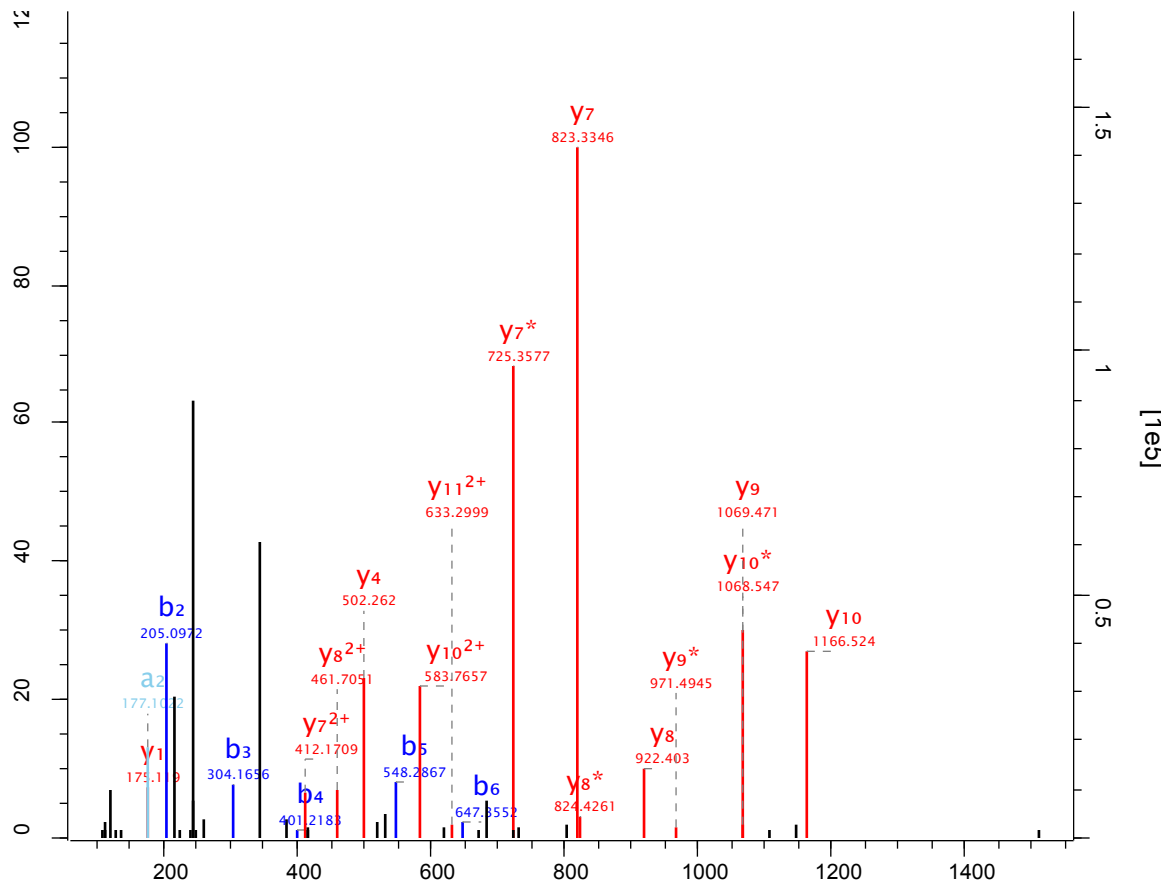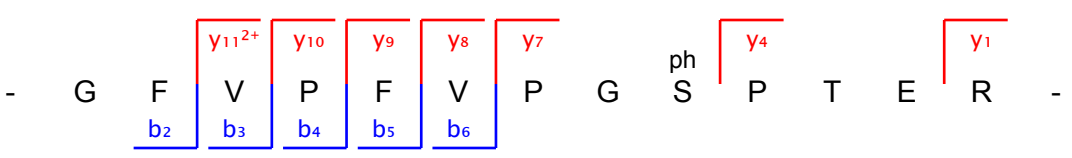

Raw file Scan Method Score m/z  
 Recip\_2\_34\_38 2987 FTMS; HCD 176.98 606.27

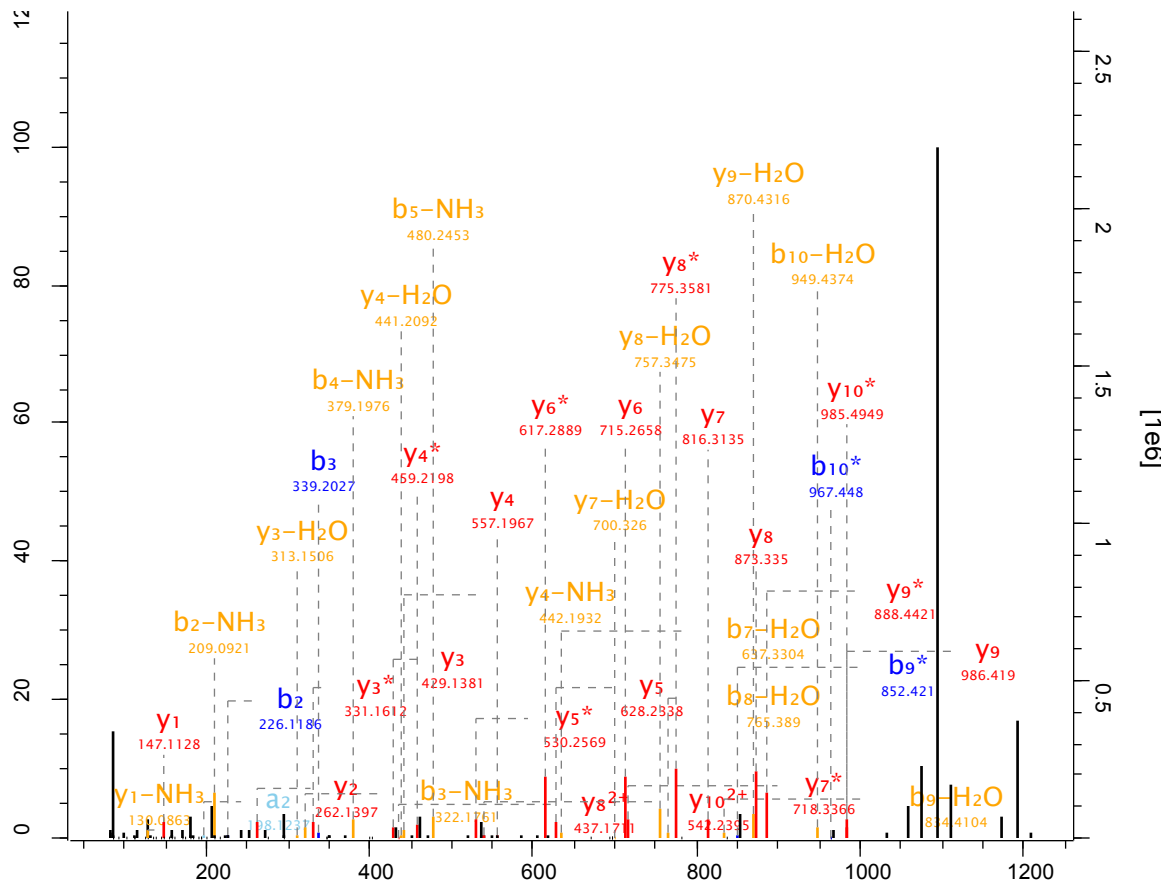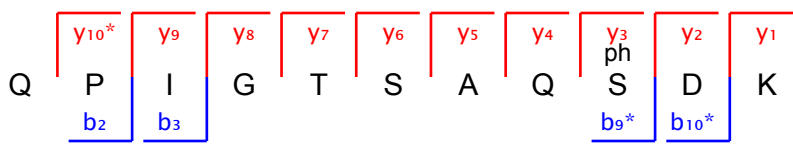

Raw file Scan Method m/z  
 Recip\_2\_34\_38 3011 FTMS; HCD 127.78 557.75

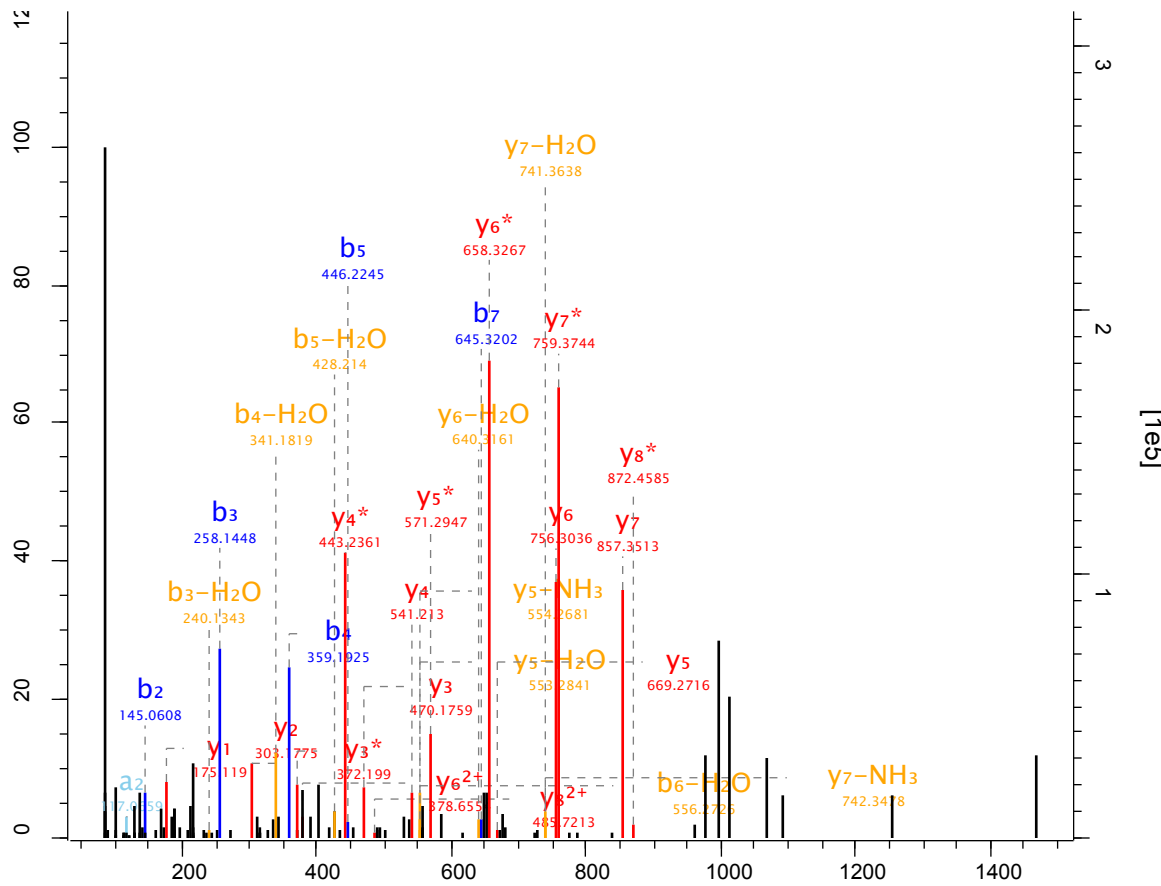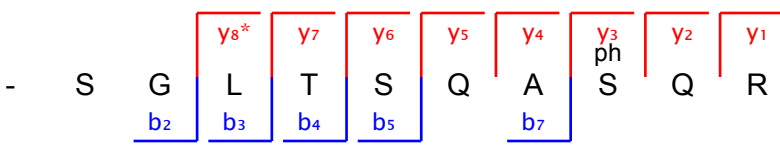



| Raw file      | Scan | Method    | Score | m/z    |
|---------------|------|-----------|-------|--------|
| Recip_2_34_38 | 3083 | FTMS; HCD | 70.09 | 548.25 |

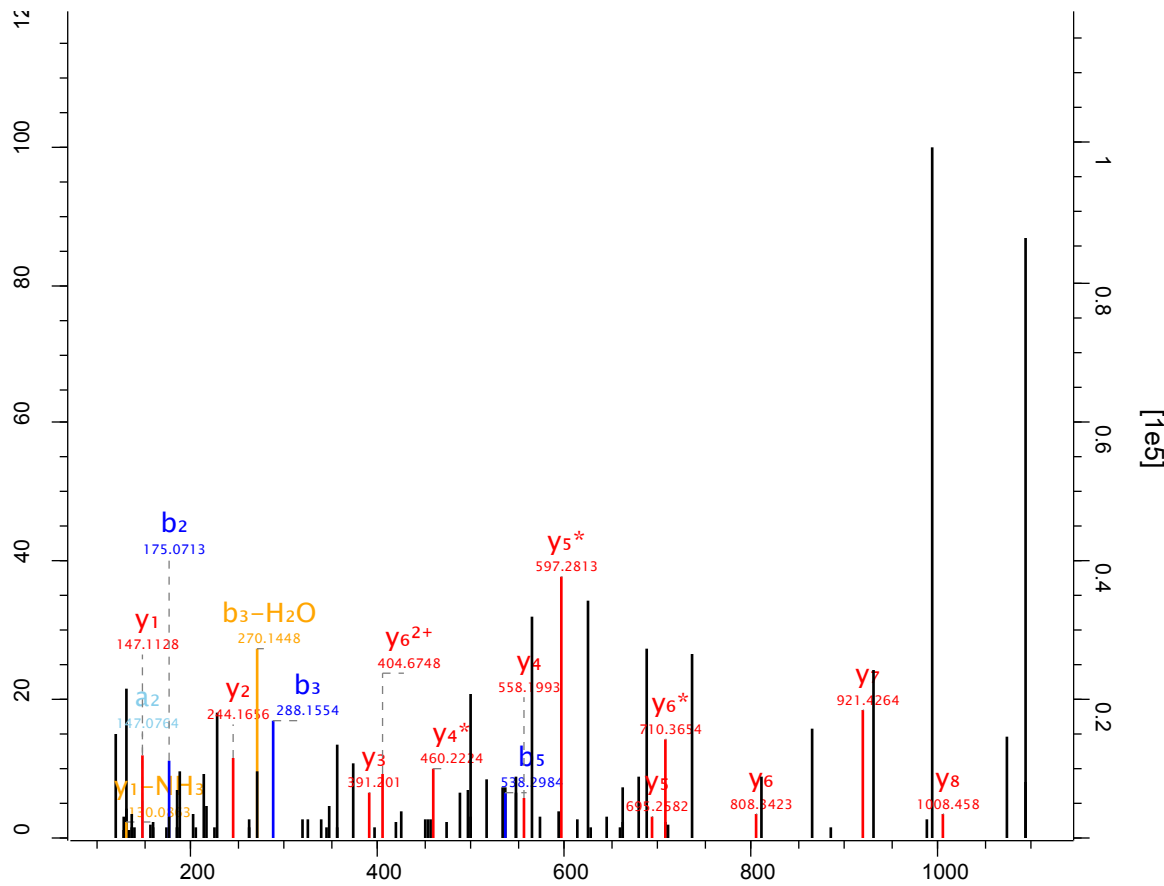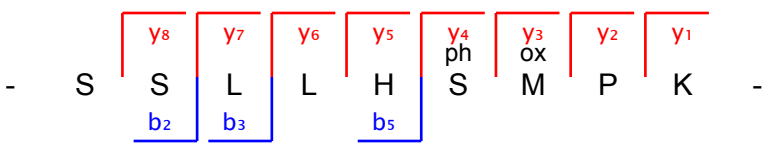

Raw file Scan Method Score m/z  
 Recip\_2\_34\_38 3086 FTMS; HCD 57.94 720.8

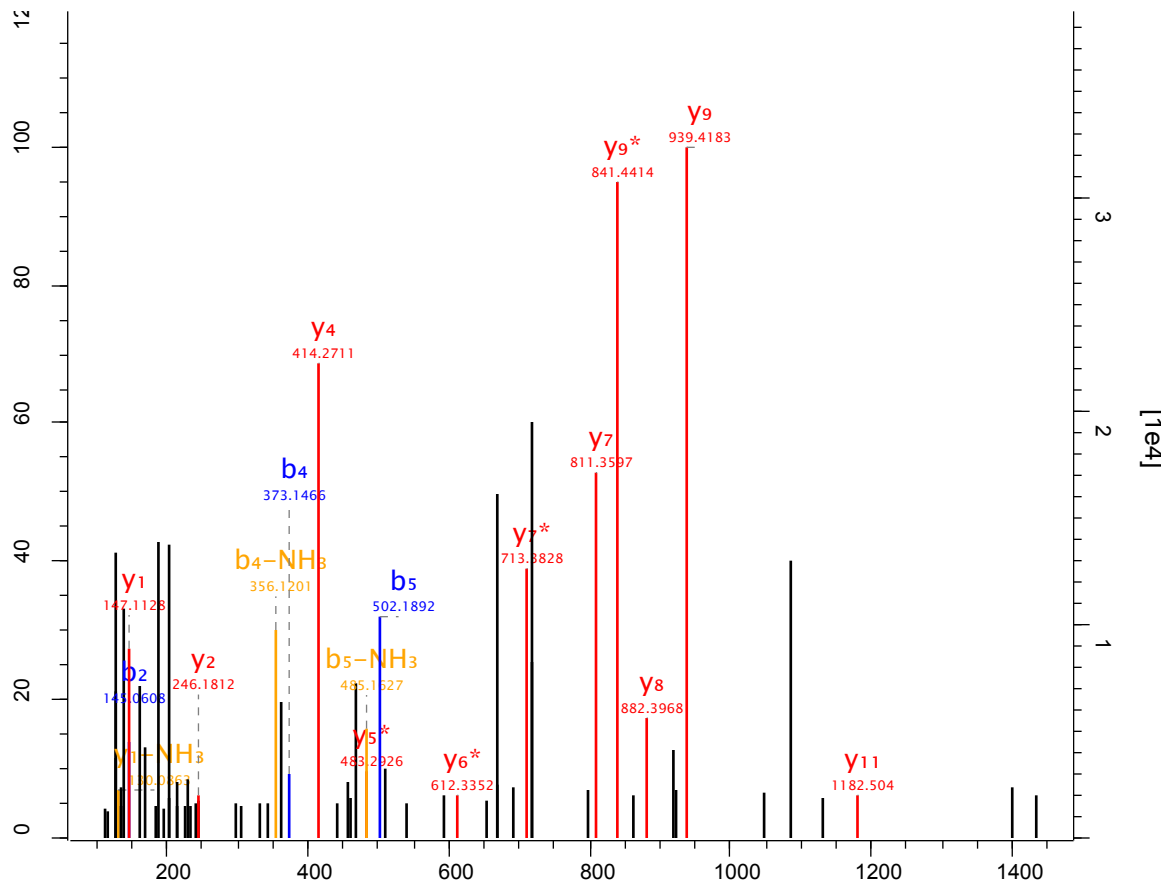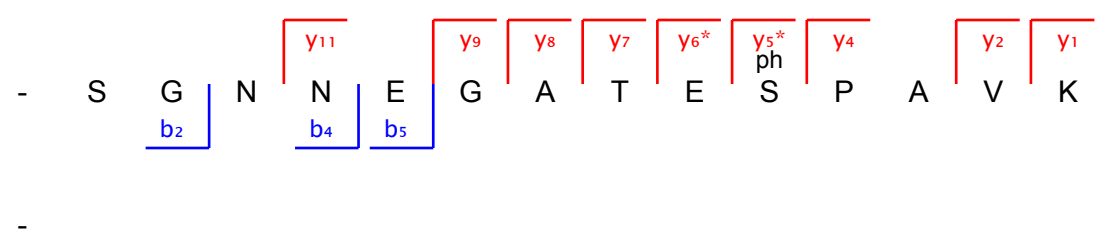

Raw file Scan Method Score m/z  
 Recip\_2\_34\_38 3118 FTMS; HCD 63.3 696.65

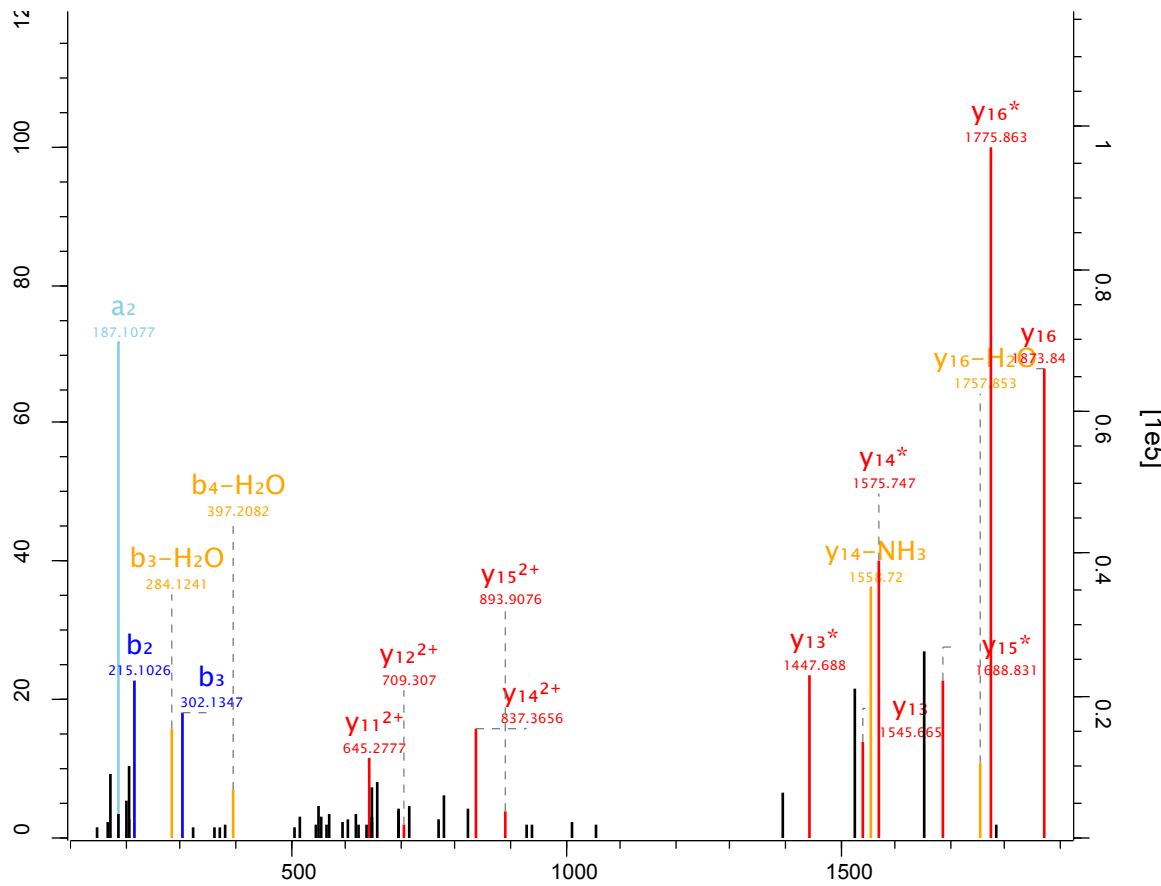

- D V S L Q Q Q E E G R S S S  
 b2 b3  
 y16 y15\* y14\* y13 y12<sup>2+</sup> y11<sup>2+</sup>  
 ph

S S R K -

Raw file Scan Method Score m/z  
 Recip\_2\_34\_38 31396 FTMS; HCD 199.57 913.42

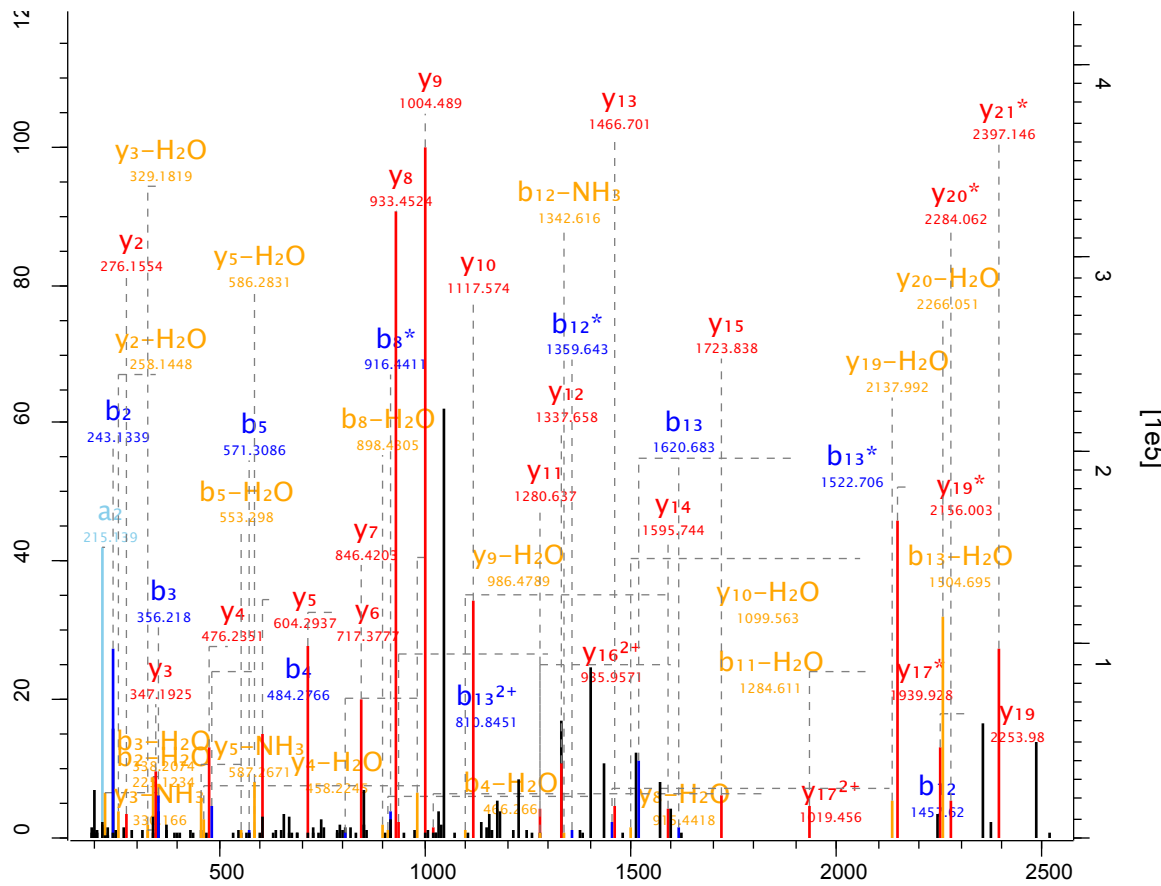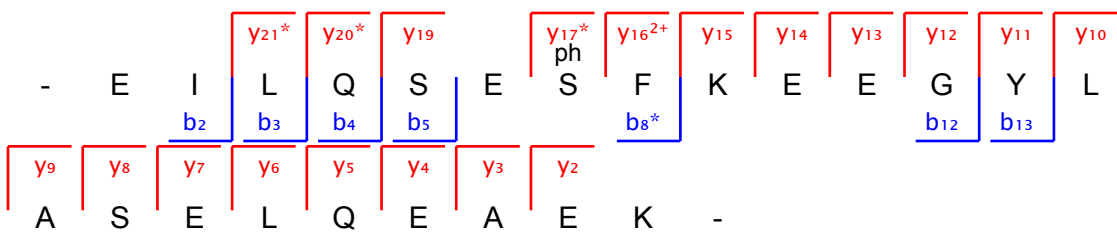

Raw file Scan Method Score m/z  
 Recip\_2\_34\_38 31667 FTMS; HCD 317.01 941.95

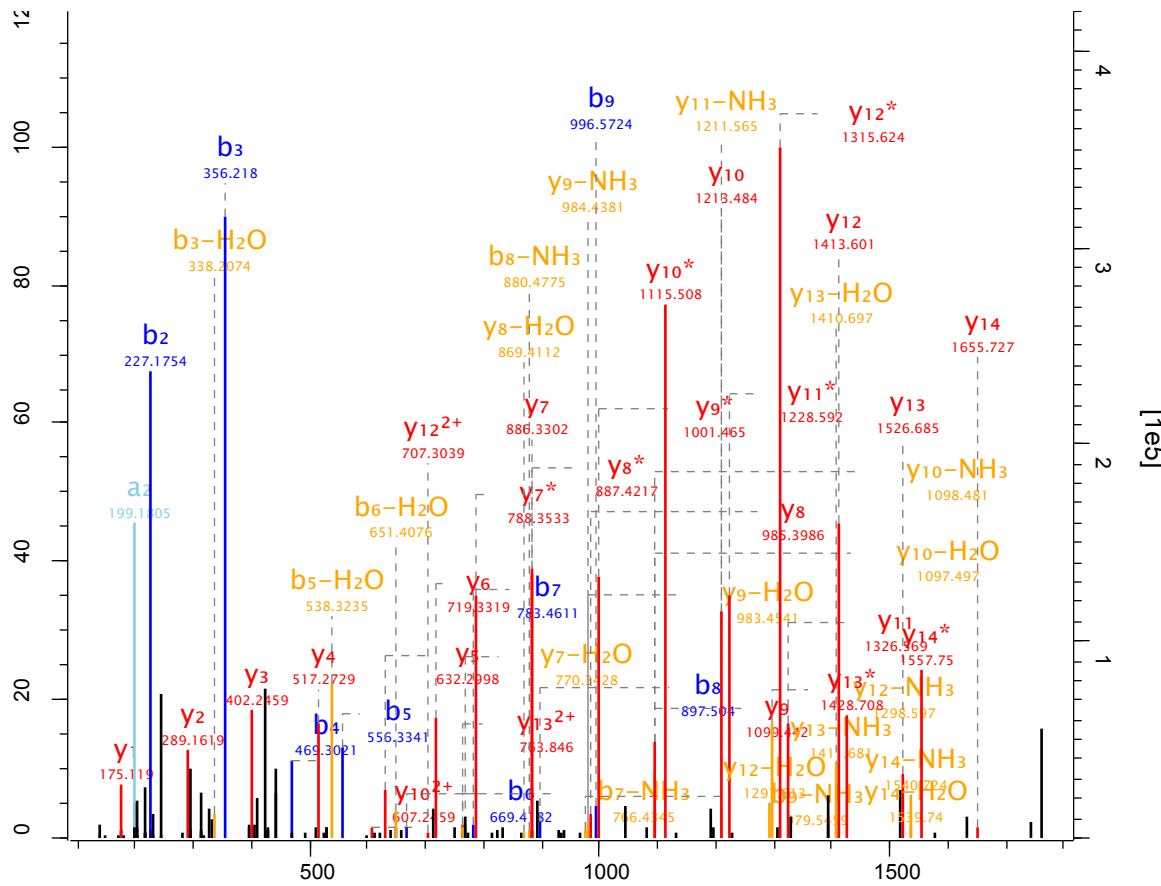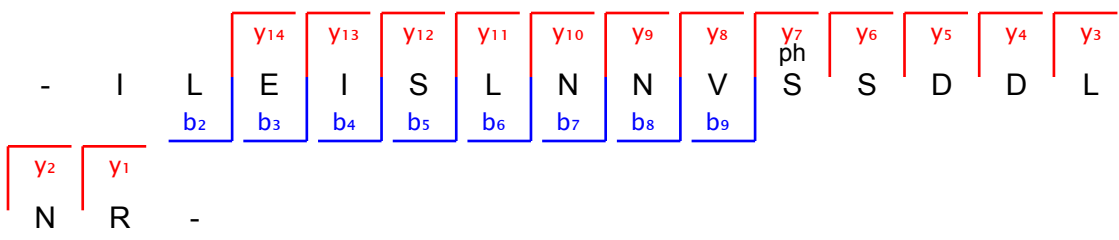

Raw file Scan Method Score m/z  
 Recip\_2\_34\_38 32115 FTMS; HCD 87.32 865.37

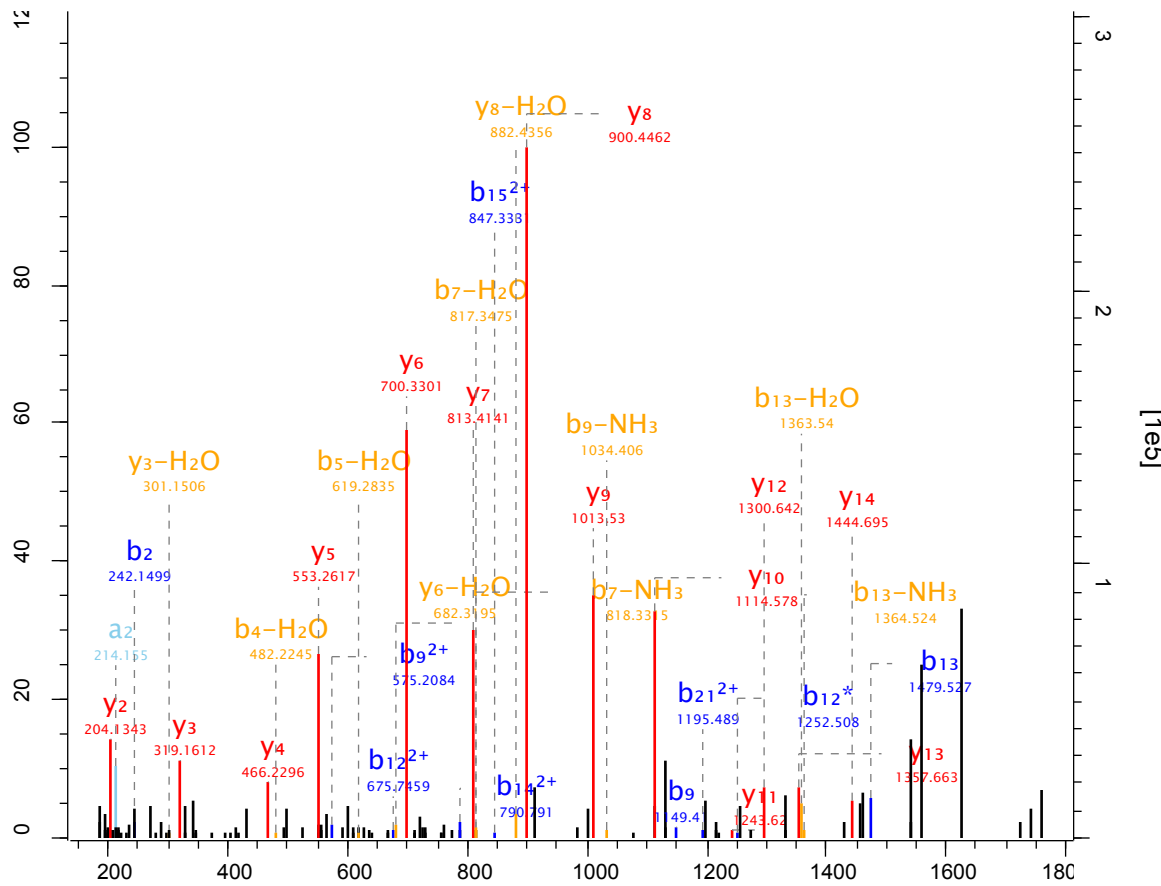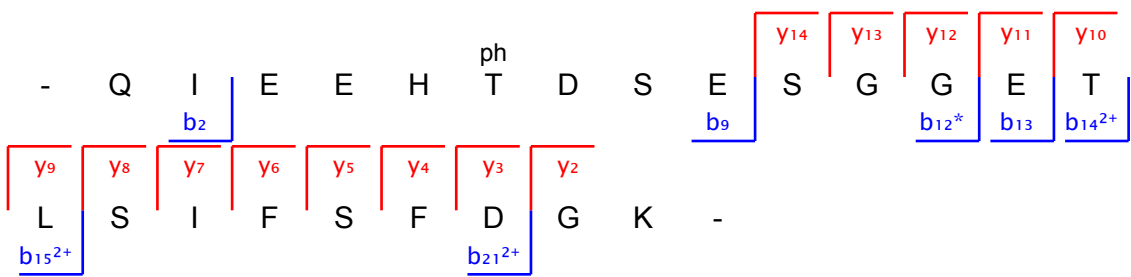

| Raw file      | Scan | Method    | Score | m/z    |
|---------------|------|-----------|-------|--------|
| Recip_2_34_38 | 3297 | FTMS; HCD | 46.99 | 400.18 |

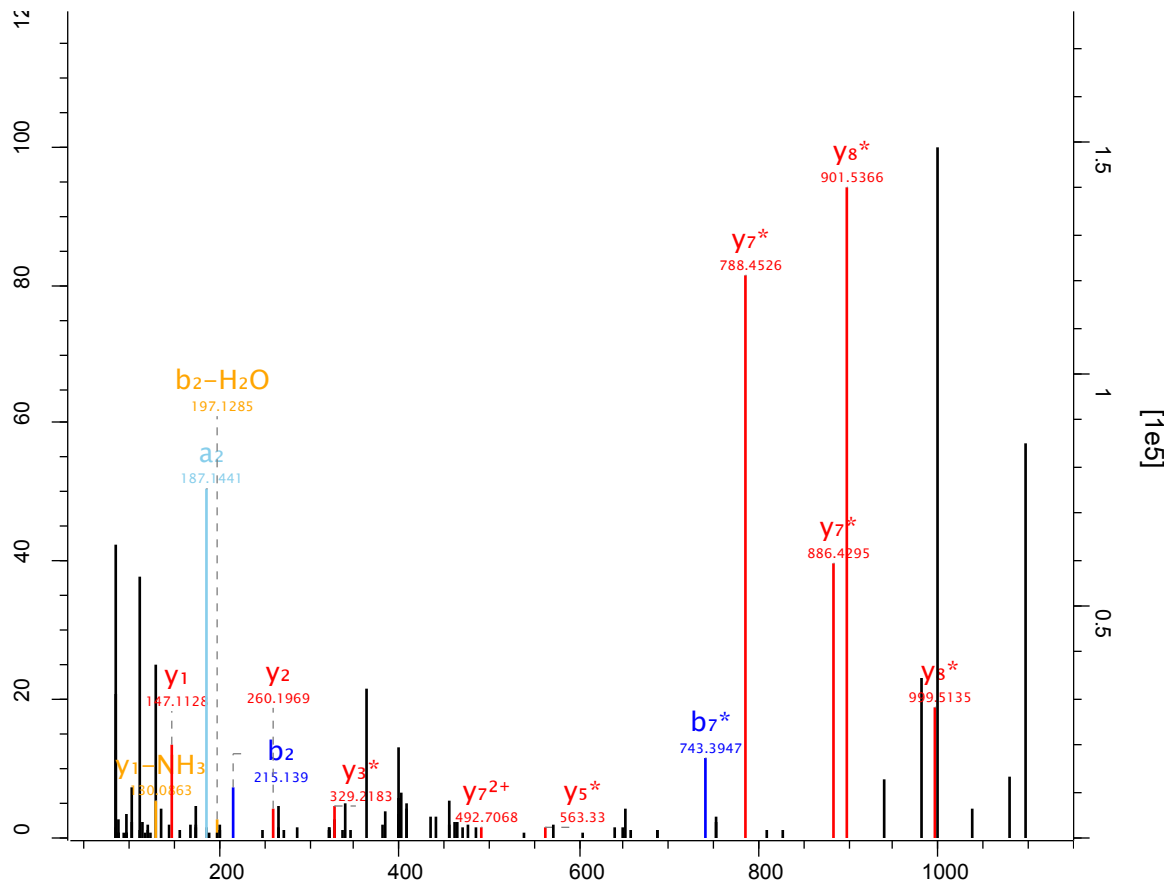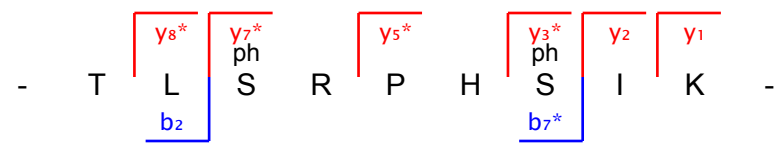

| Raw file      | Scan | Method    | Score | m/z    |
|---------------|------|-----------|-------|--------|
| Recip_2_34_38 | 3344 | FTMS; HCD | 42.6  | 559.75 |

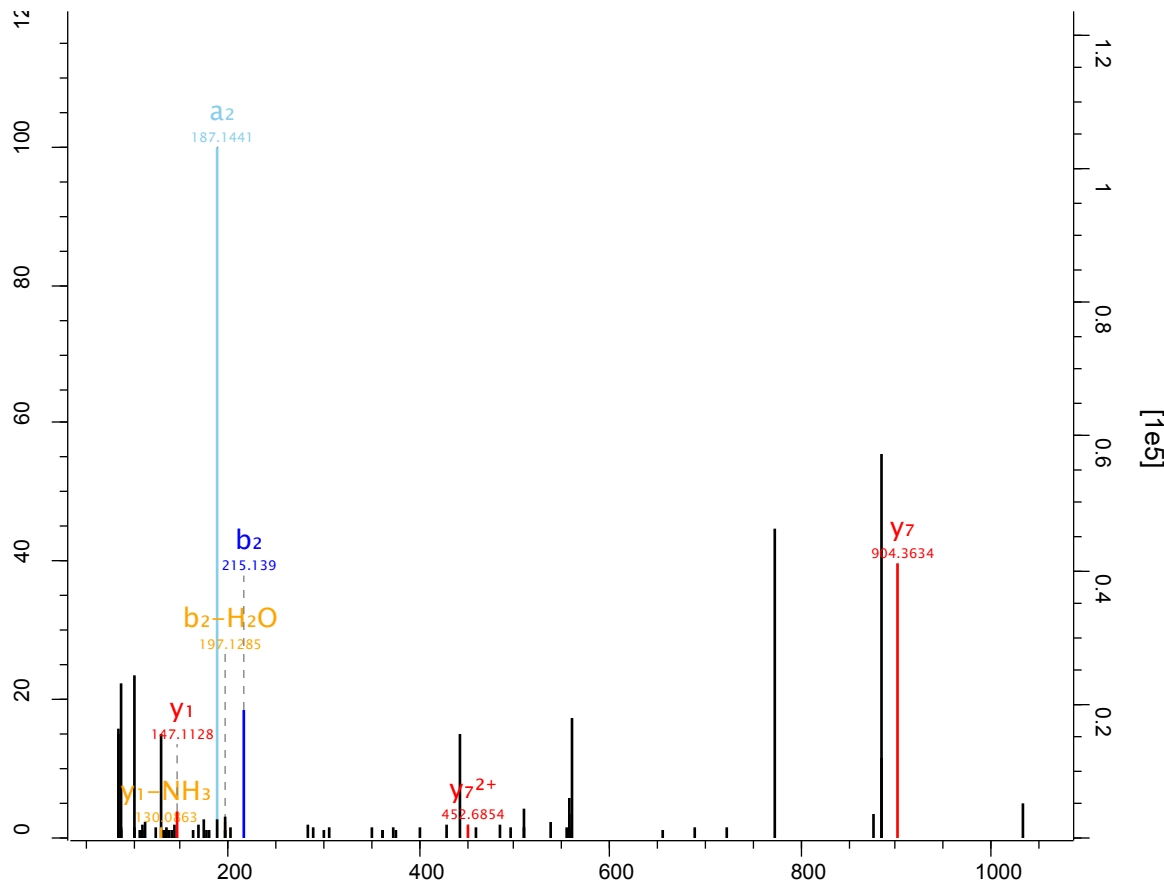

- L T C S Y P G I K -

Annotations: b<sub>2</sub> (under T), y<sub>7</sub> (over C), y<sub>1</sub> (over K)



| Raw file      | Scan | Method    | Score | m/z    |
|---------------|------|-----------|-------|--------|
| Recip_2_34_38 | 3357 | FTMS; HCD | 42.08 | 615.76 |

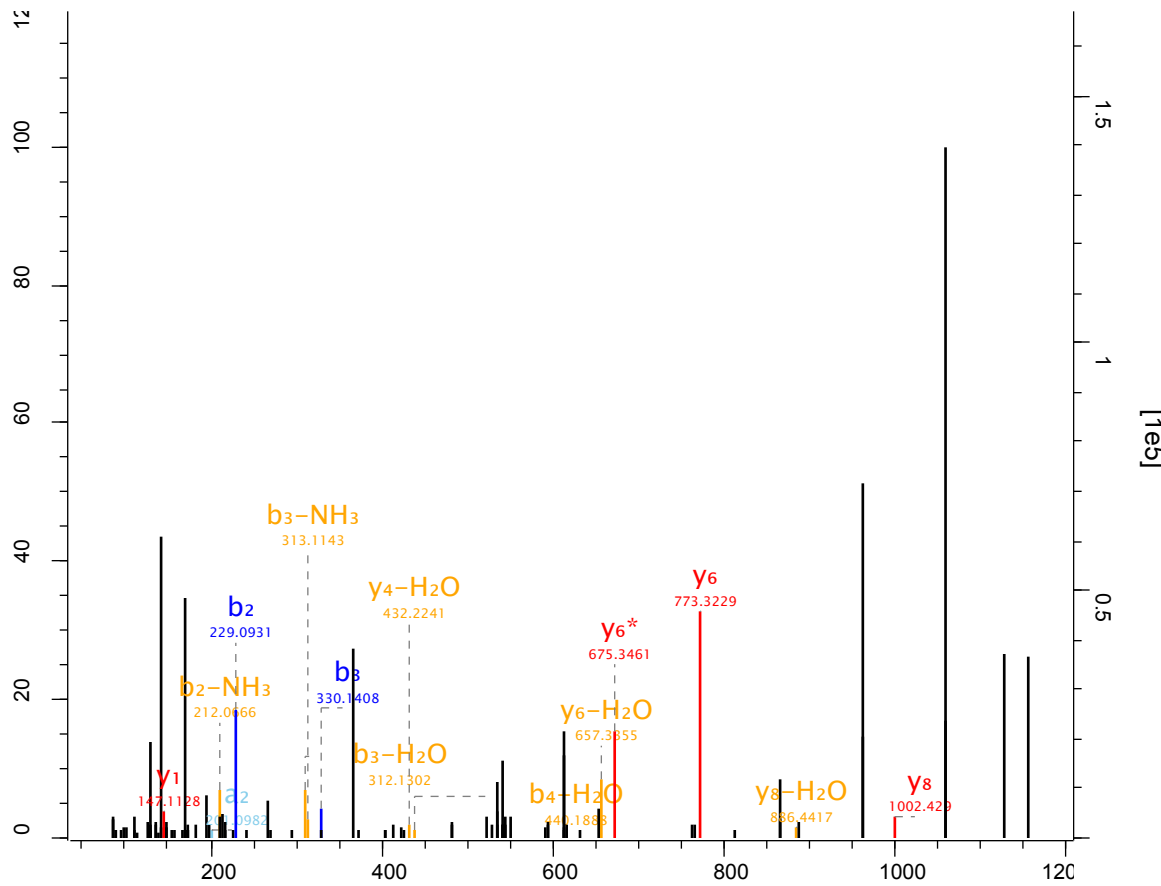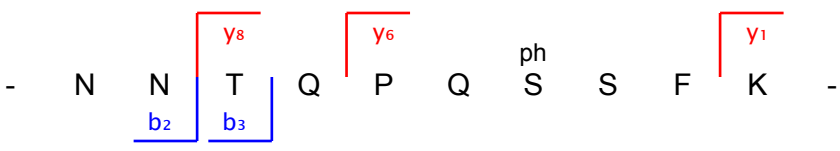

| Raw file      | Scan | Method    | Score | m/z    |
|---------------|------|-----------|-------|--------|
| Recip_2_34_38 | 3358 | FTMS; HCD | 44.43 | 629.28 |

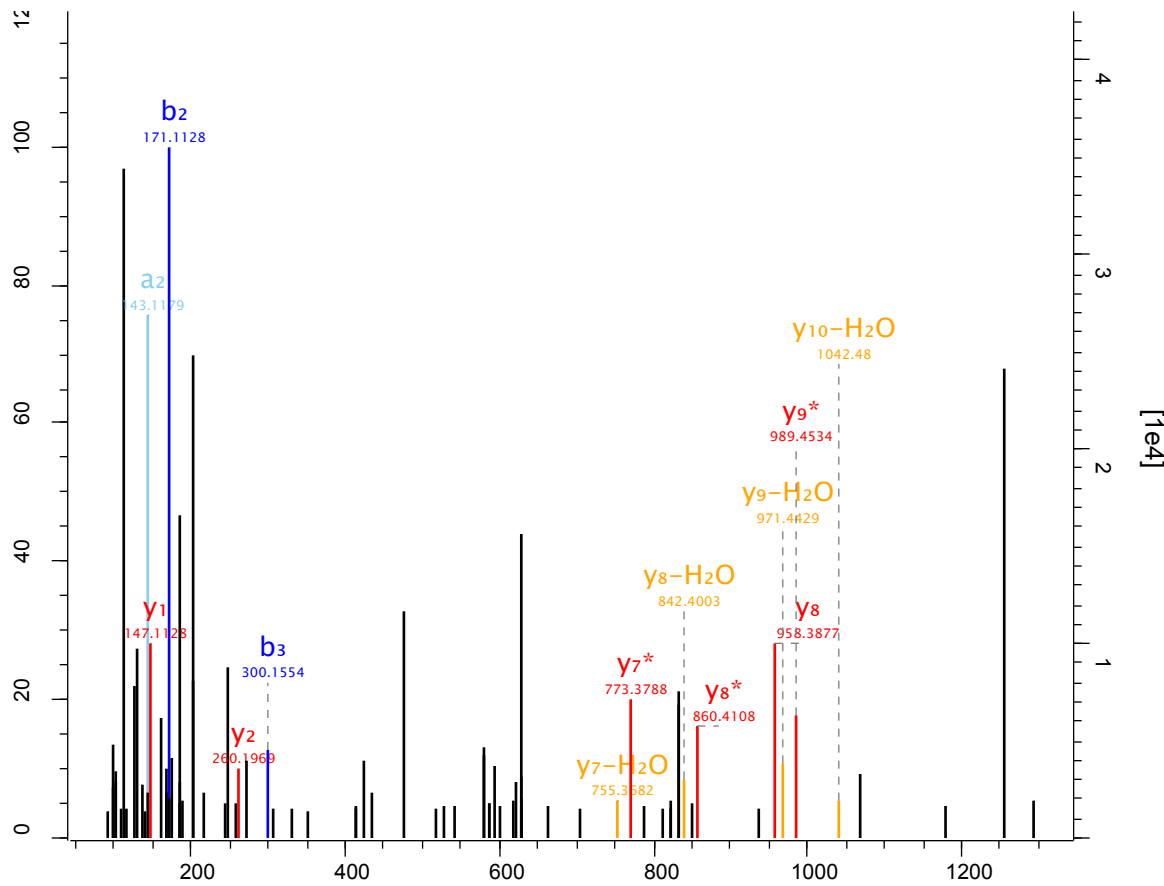

- V A E S S N N E L K -

Annotations: b<sub>2</sub> (under A), b<sub>3</sub> (under E), y<sub>9</sub>\* (over E), y<sub>8</sub> (over S), y<sub>7</sub>\* (over S), y<sub>2</sub> (over L), y<sub>1</sub> (over K).

| Raw file      | Scan | Method    | Score | m/z    |
|---------------|------|-----------|-------|--------|
| Recip_2_34_38 | 3368 | FTMS; HCD | 76.76 | 498.92 |

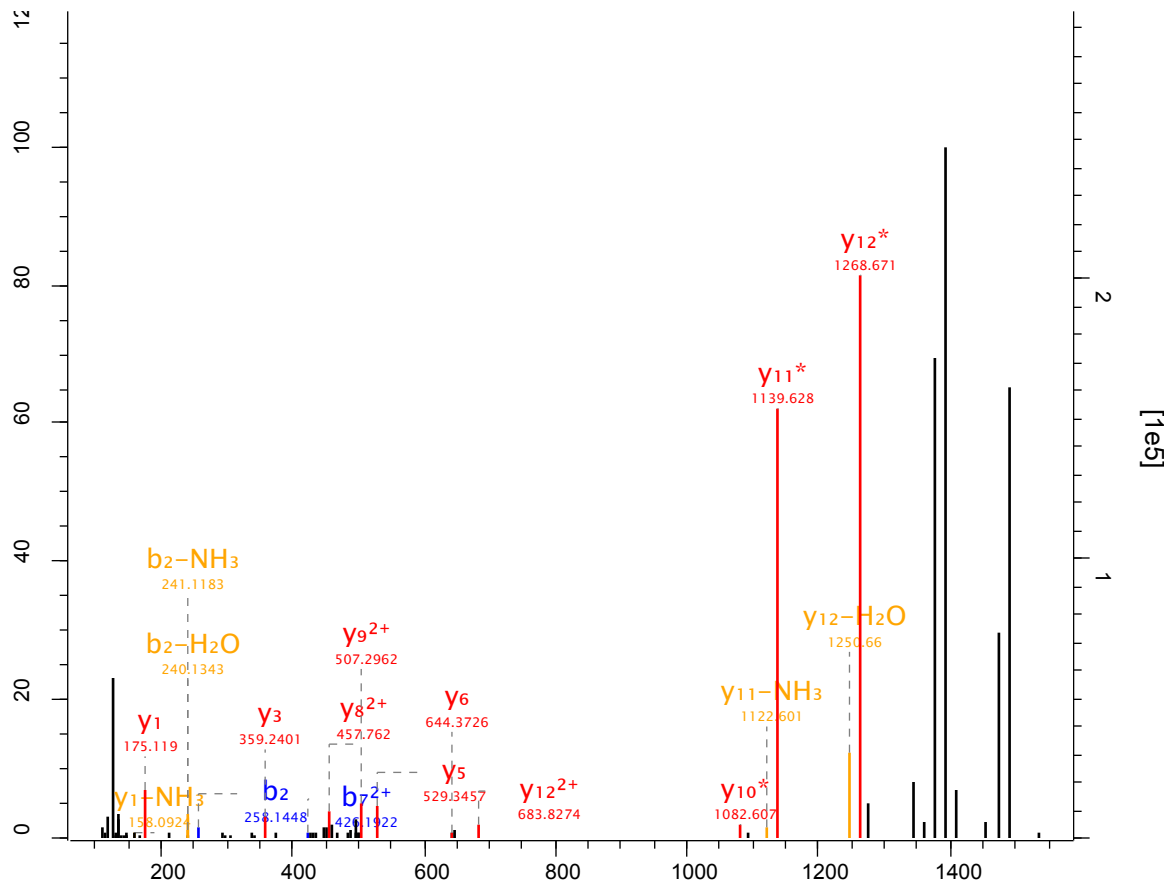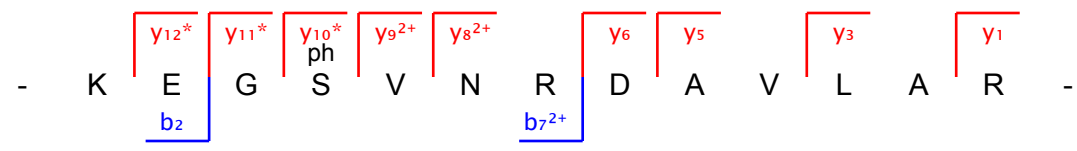

Raw file Scan Method Score m/z  
 Recip\_2\_34\_38 33930 FTMS; HCD 280.49 976.11

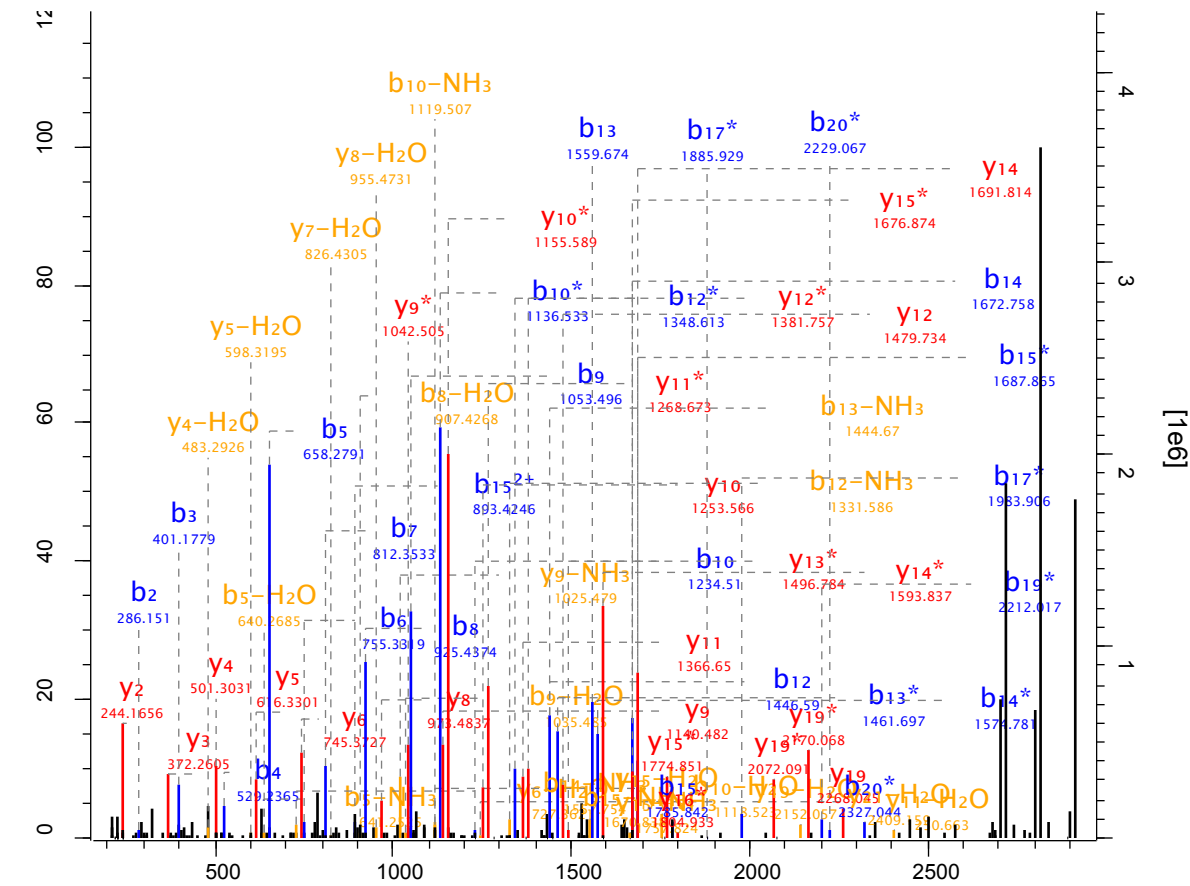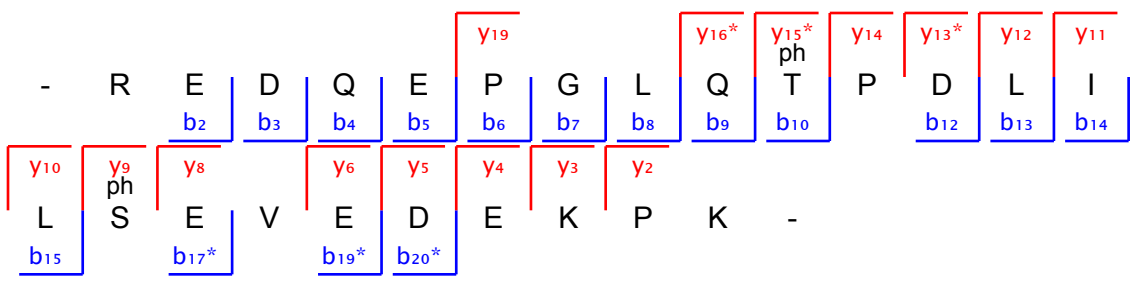

Raw file Scan Method Score m/z  
 Recip\_2\_34\_38 3414 FTMS; HCD 248.99 780.3

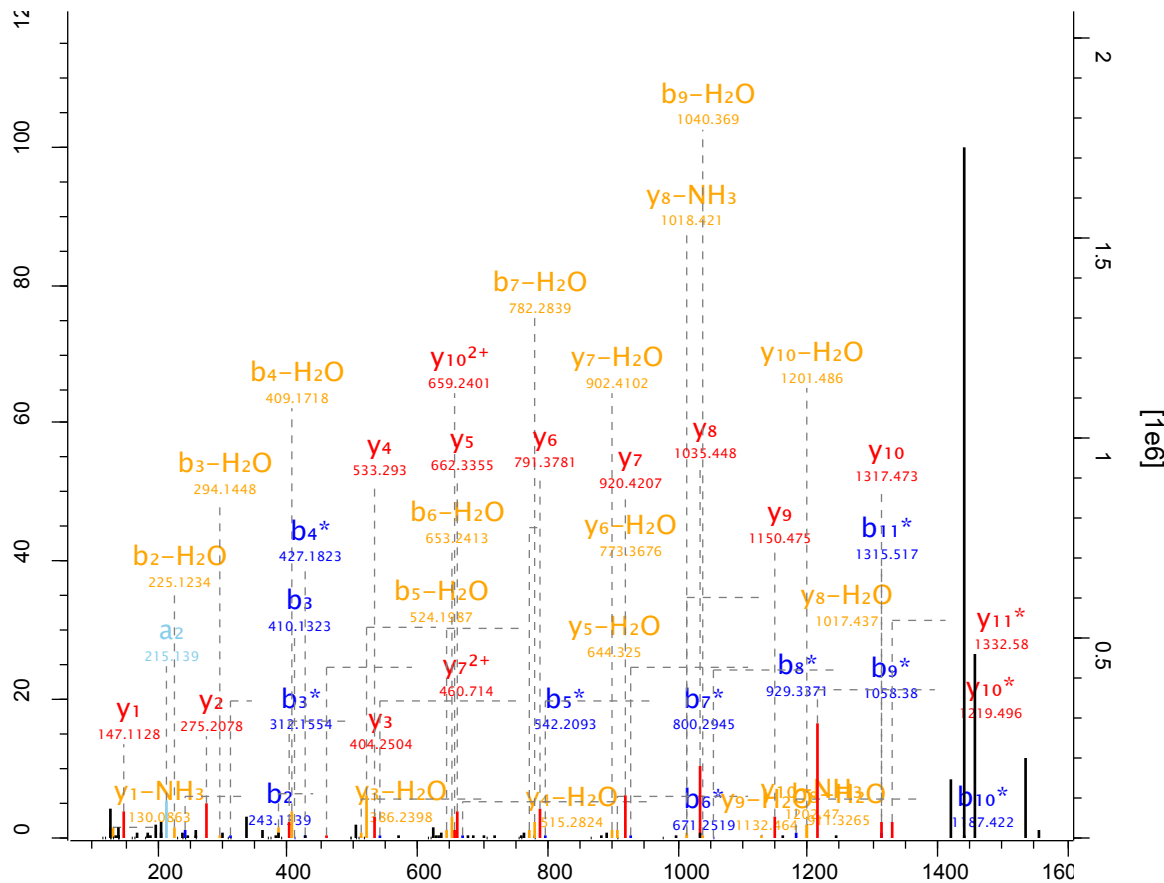

y<sub>11</sub><sup>\*</sup>
y<sub>10</sub>ph
y<sub>9</sub>
y<sub>8</sub>
y<sub>7</sub>
y<sub>6</sub>
y<sub>5</sub>
y<sub>4</sub>
y<sub>3</sub>
y<sub>2</sub>
y<sub>1</sub>

- E I S D D E E E E E K -

b<sub>2</sub>
b<sub>3</sub>
b<sub>4</sub><sup>\*</sup>
b<sub>5</sub><sup>\*</sup>
b<sub>6</sub><sup>\*</sup>
b<sub>7</sub><sup>\*</sup>
b<sub>8</sub><sup>\*</sup>
b<sub>9</sub><sup>\*</sup>
b<sub>10</sub><sup>\*</sup>
b<sub>11</sub><sup>\*</sup>

Raw file Scan Method Score m/z  
 Recip\_2\_34\_38 34712 FTMS; HCD 42.42 848.37

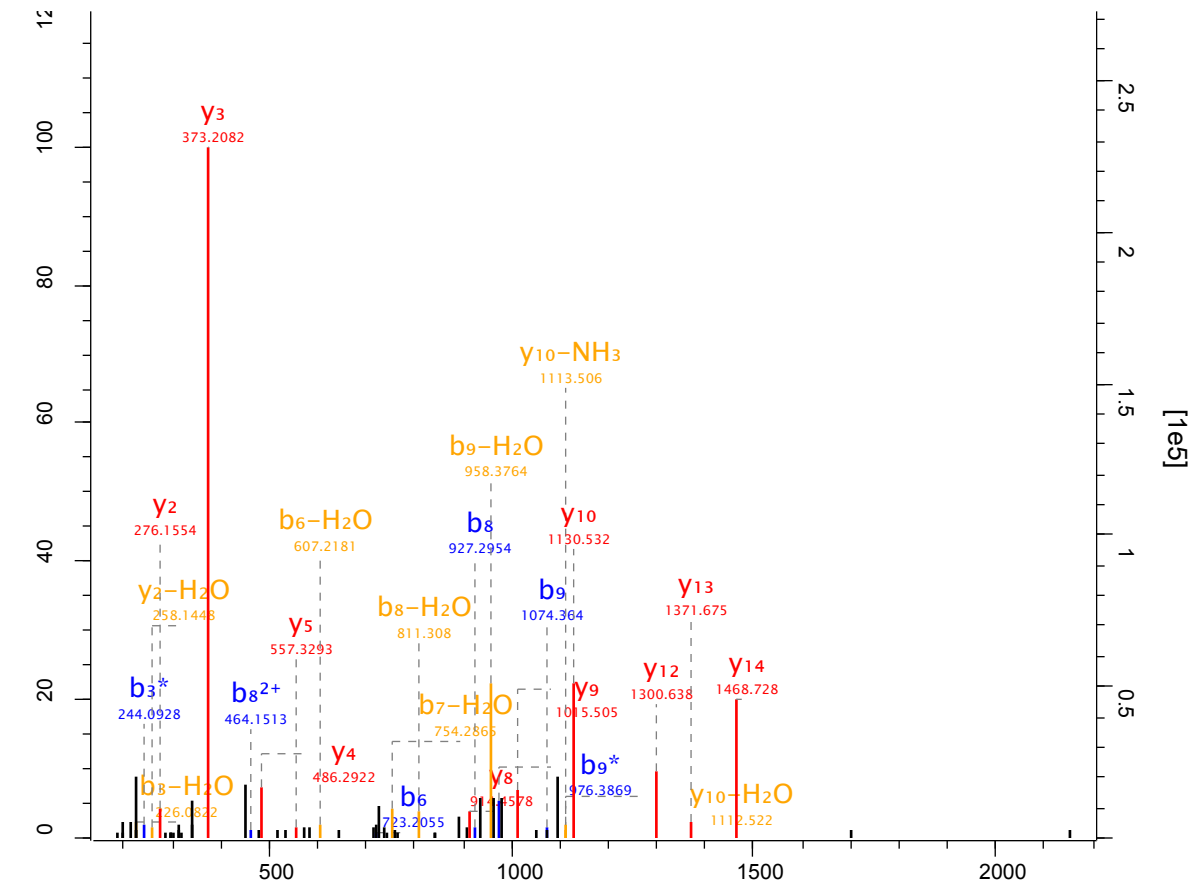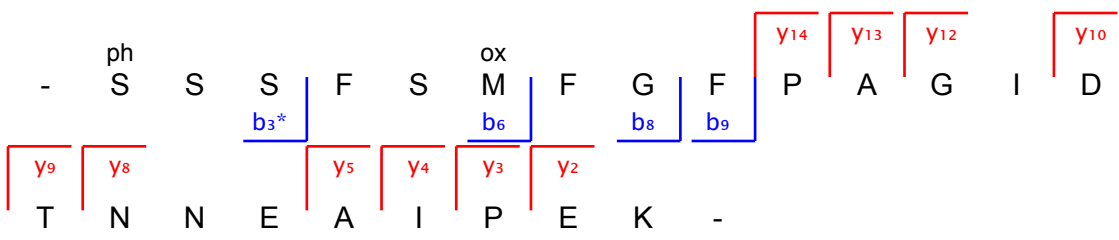

Raw file Scan Method Score m/z  
 Recip\_2\_34\_38 35030 FTMS; HCD 42.64 693.95

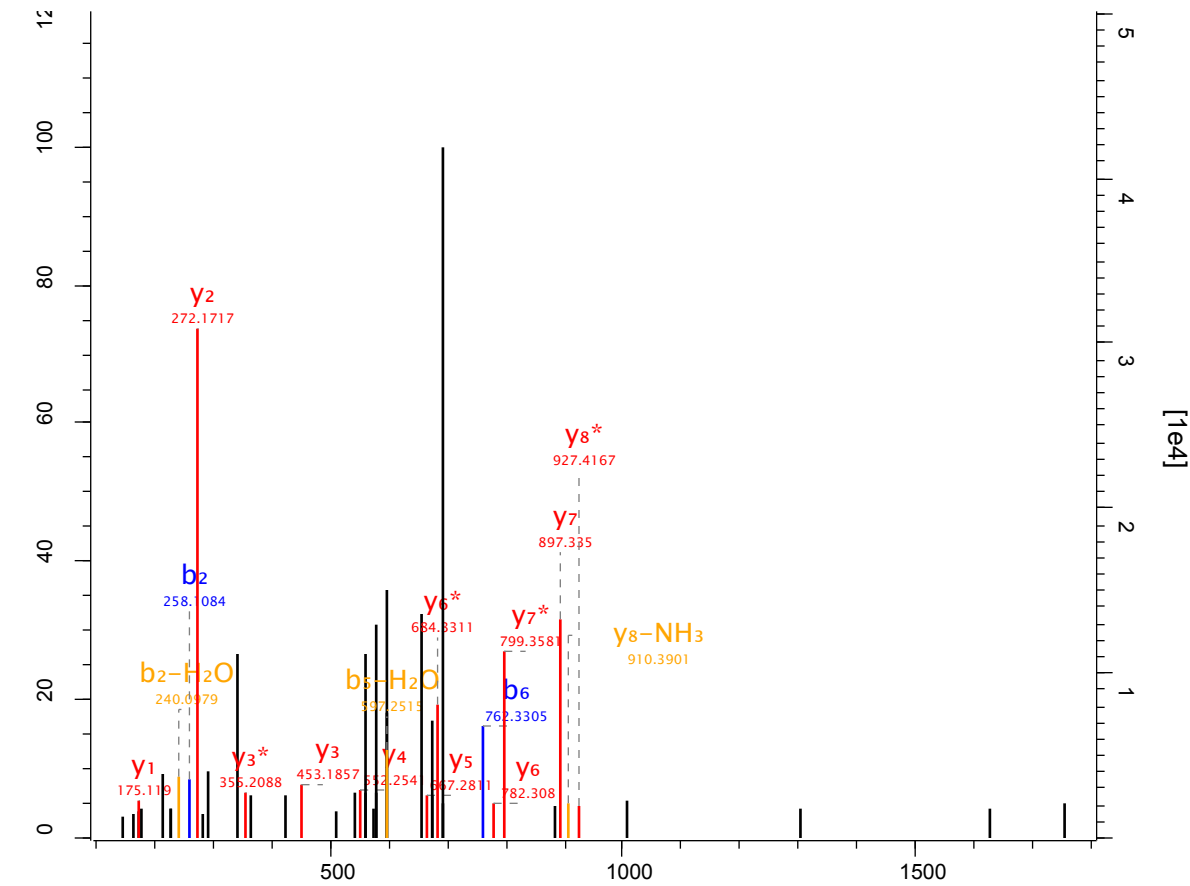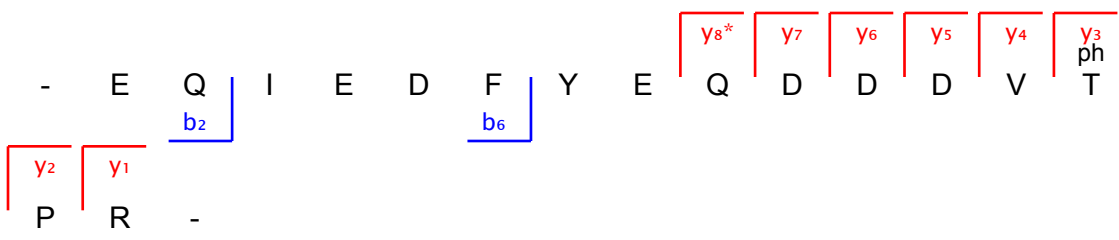

Raw file Scan Method Score m/z  
 Recip\_2\_34\_38 35235 FTMS; HCD 45.14 927.08

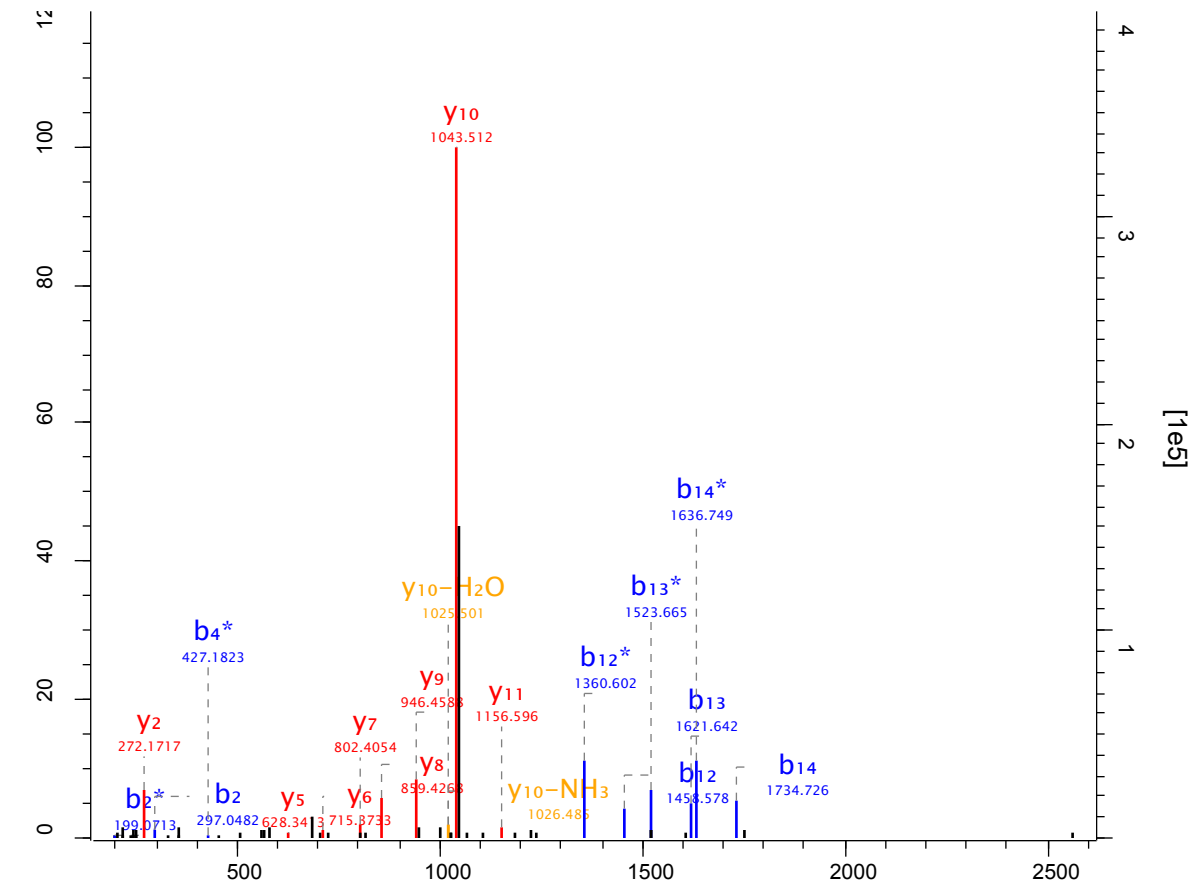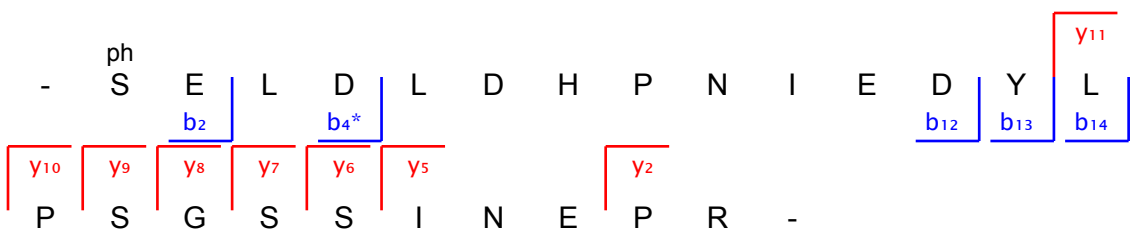



Raw file Scan Method Score m/z  
 Recip\_2\_34\_38 35622 FTMS; HCD 52.36 911.08

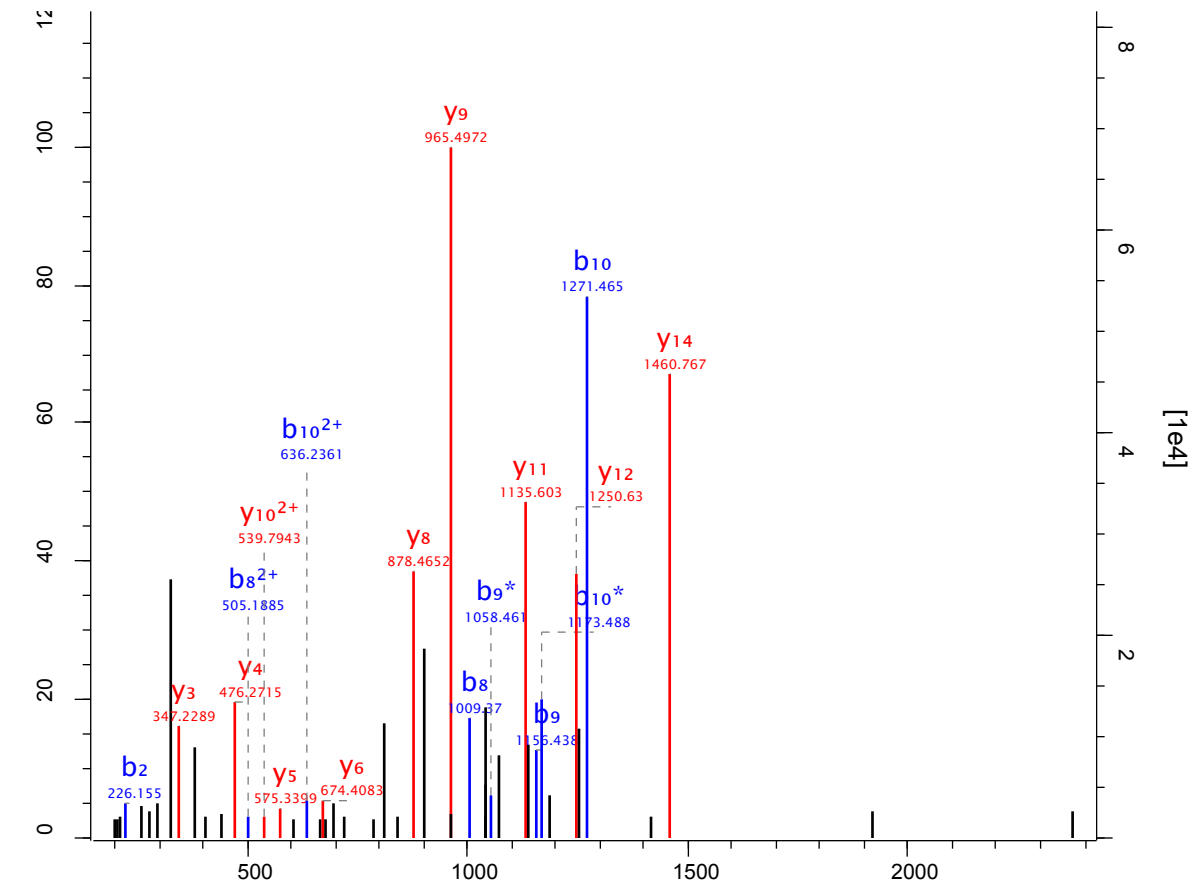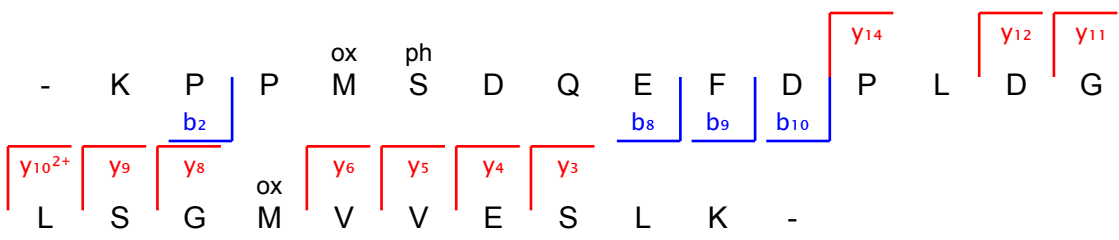

| Raw file      | Scan | Method    | Score | m/z    |
|---------------|------|-----------|-------|--------|
| Recip_2_34_38 | 3577 | FTMS; HCD | 46.46 | 421.69 |

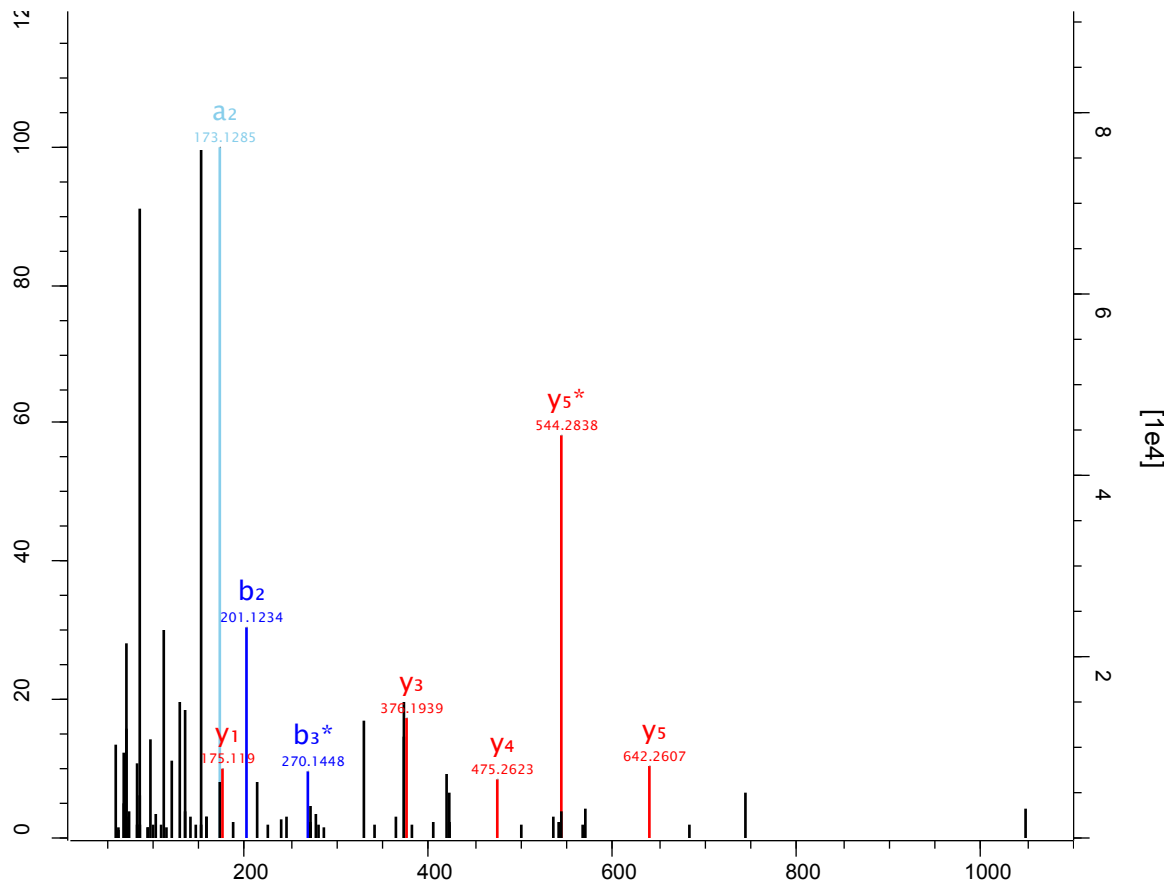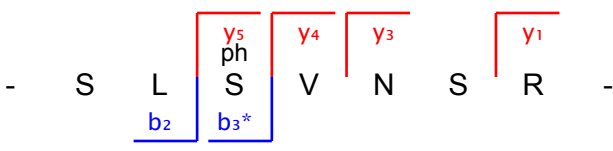

Raw file Scan Method Score m/z  
 Recip\_2\_34\_38 36382 FTMS; HCD 47.81 801.71

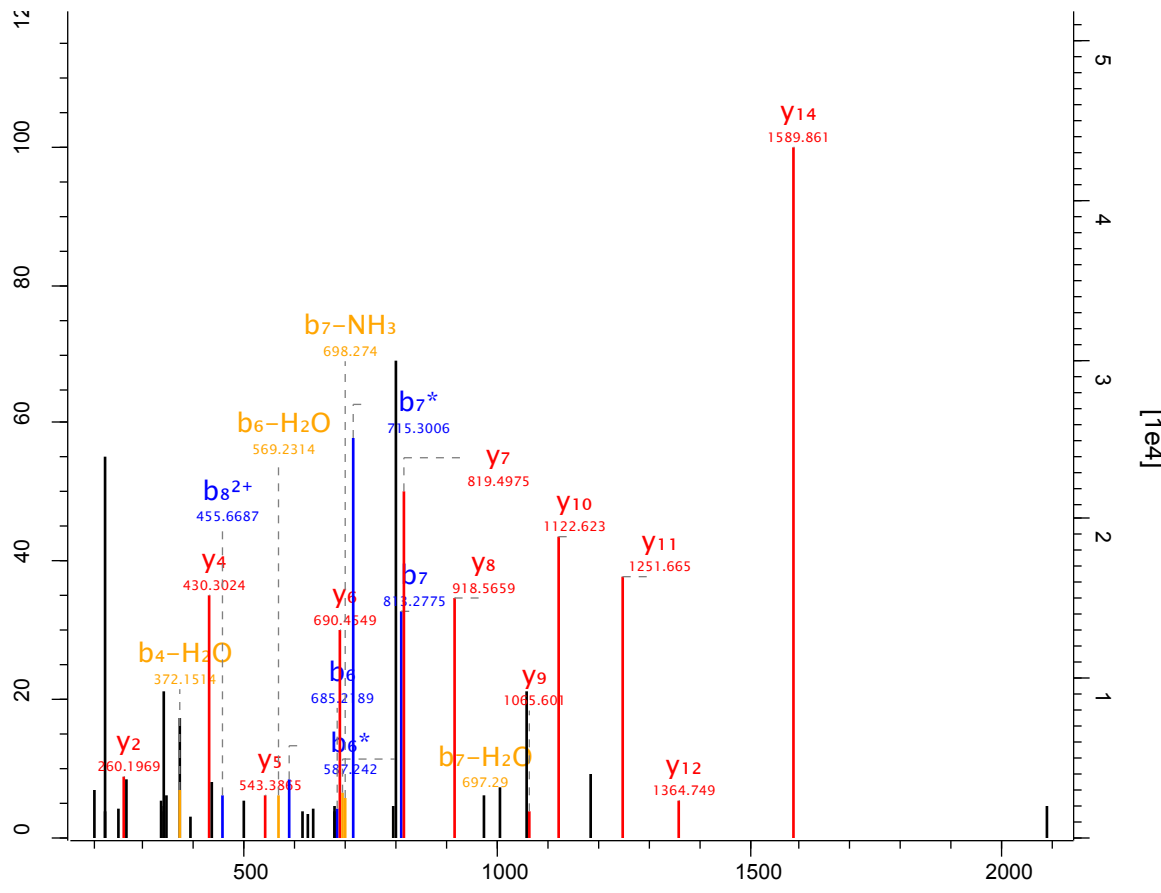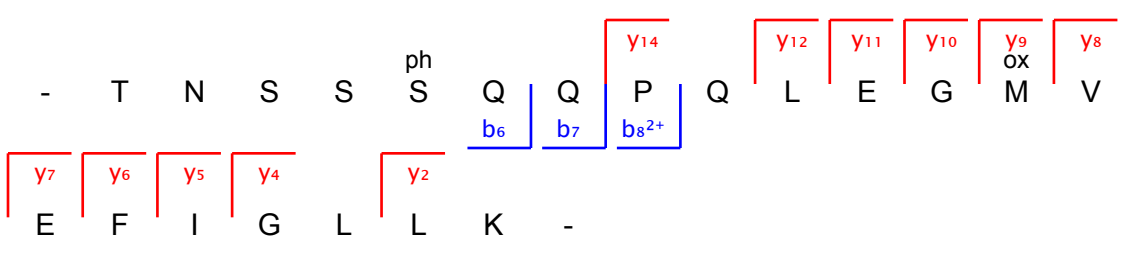

| Raw file      | Scan | Method    | Score | m/z    |
|---------------|------|-----------|-------|--------|
| Recip_2_34_38 | 3677 | FTMS; HCD | 41.88 | 422.17 |

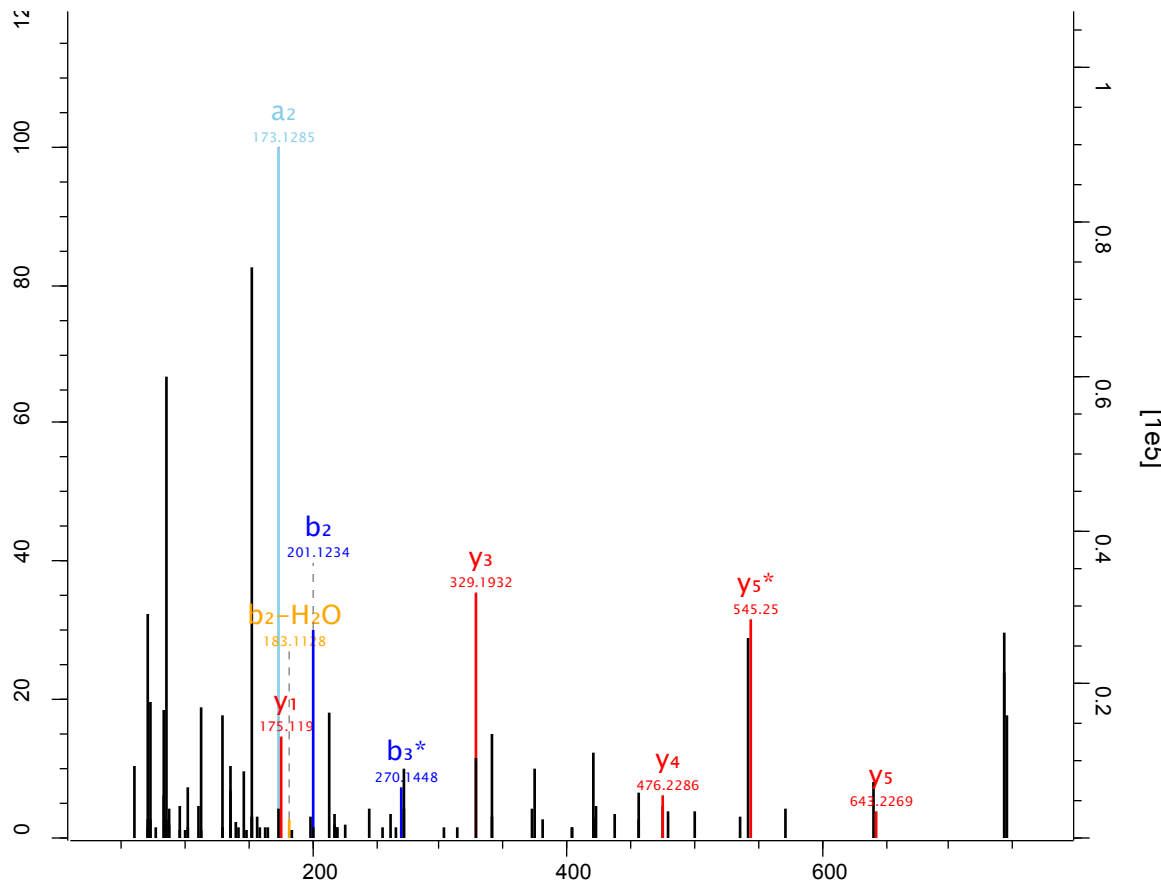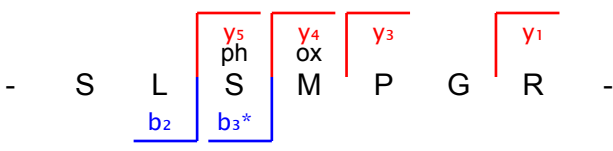

| Raw file      | Scan | Method    | Score | m/z    |
|---------------|------|-----------|-------|--------|
| Recip_2_34_38 | 3695 | FTMS; HCD | 52.72 | 734.29 |

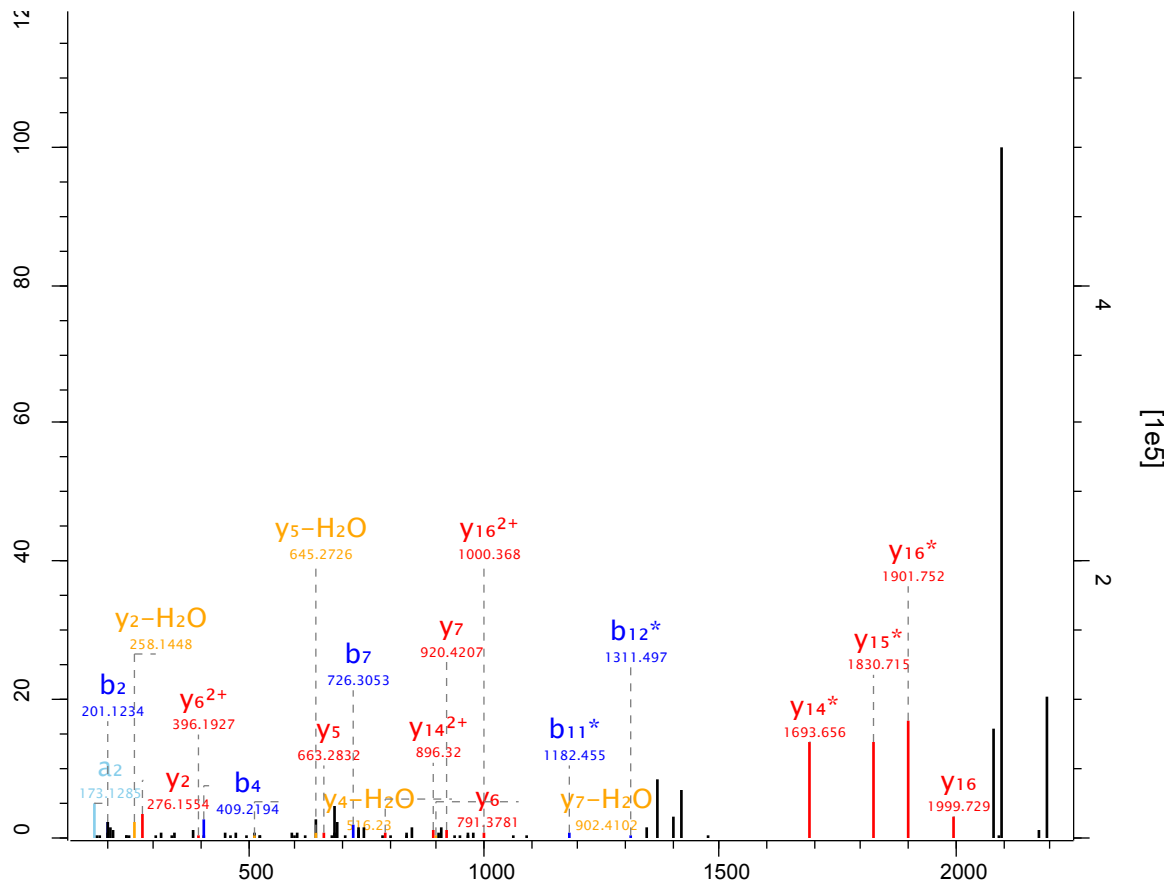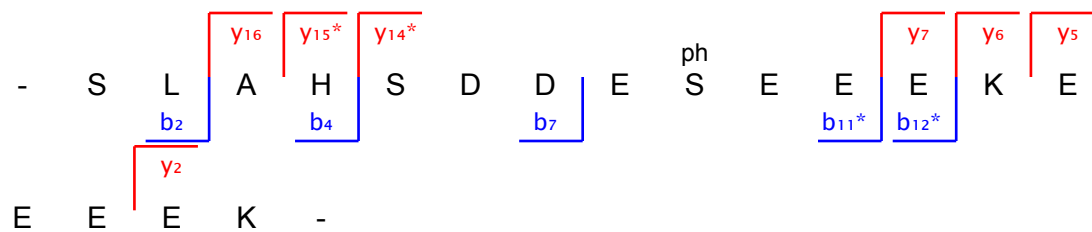

| Raw file      | Scan | Method    | Score | m/z    |
|---------------|------|-----------|-------|--------|
| Recip_2_34_38 | 3705 | FTMS; HCD | 79.15 | 427.68 |

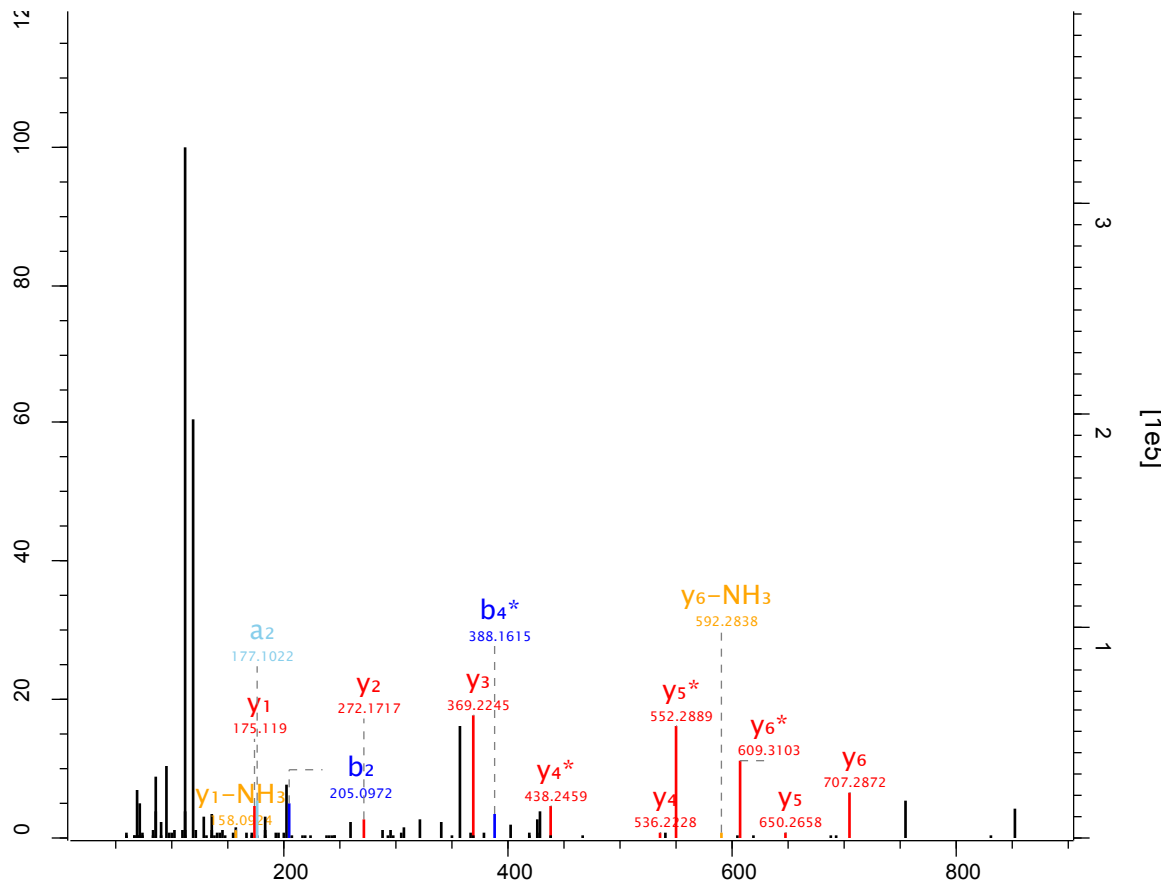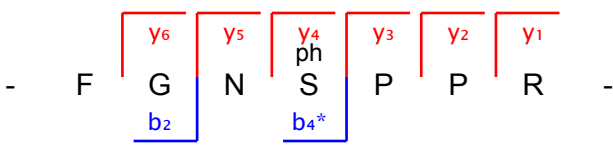

Raw file Scan Method Score m/z  
 Recip\_2\_34\_38 3713 FTMS; HCD 59.5 460.9

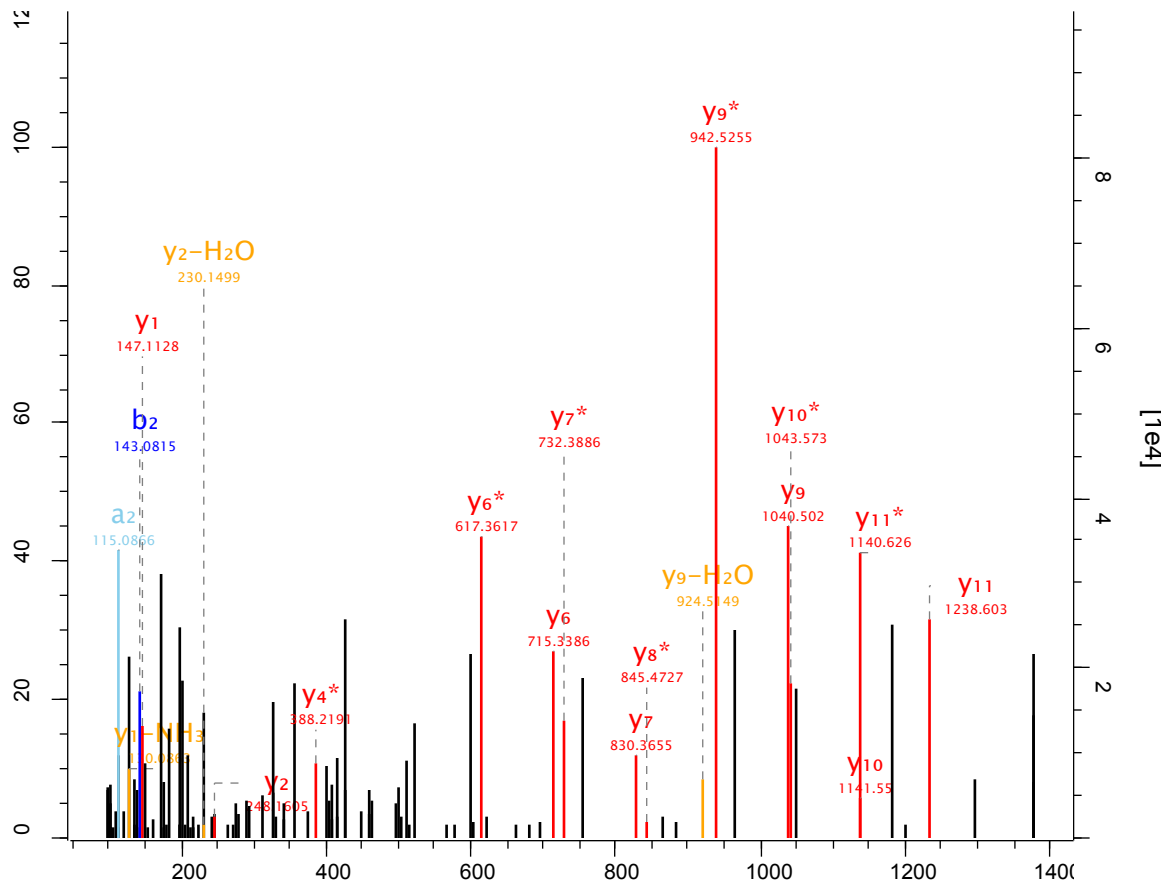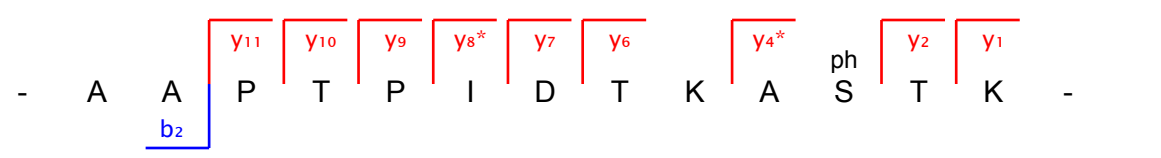

Raw file Scan Method Score m/z  
 Recip\_2\_34\_38 37150 FTMS; HCD 65.51 1087.14

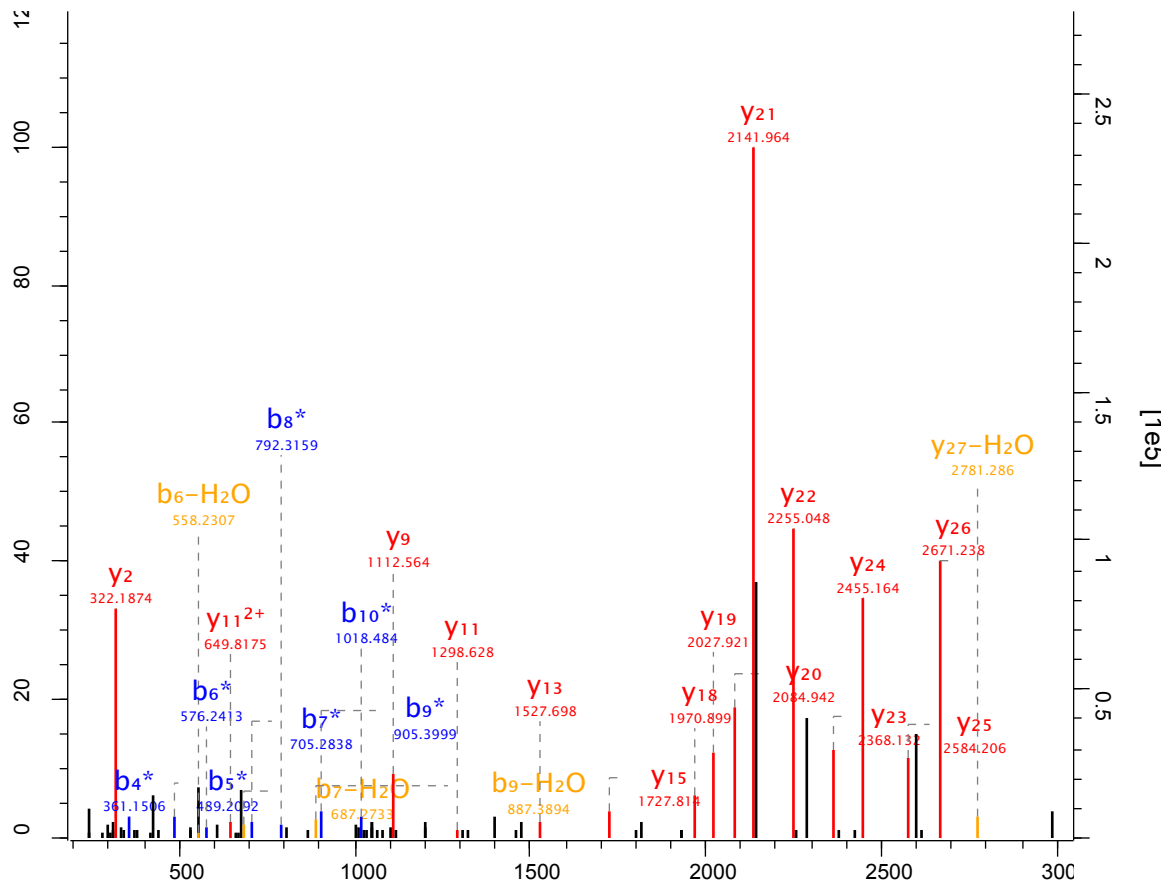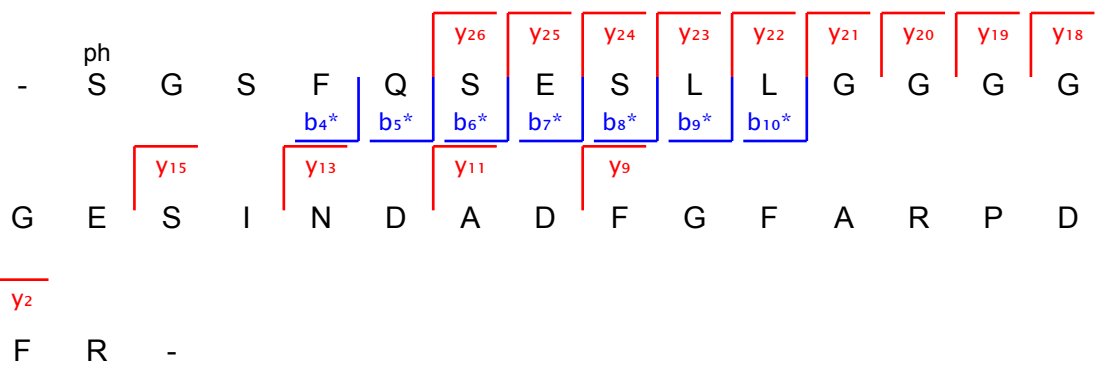



Raw file Scan Method Score m/z  
 Recip\_2\_34\_38 37400 FTMS; HCD 61.61 1056.51

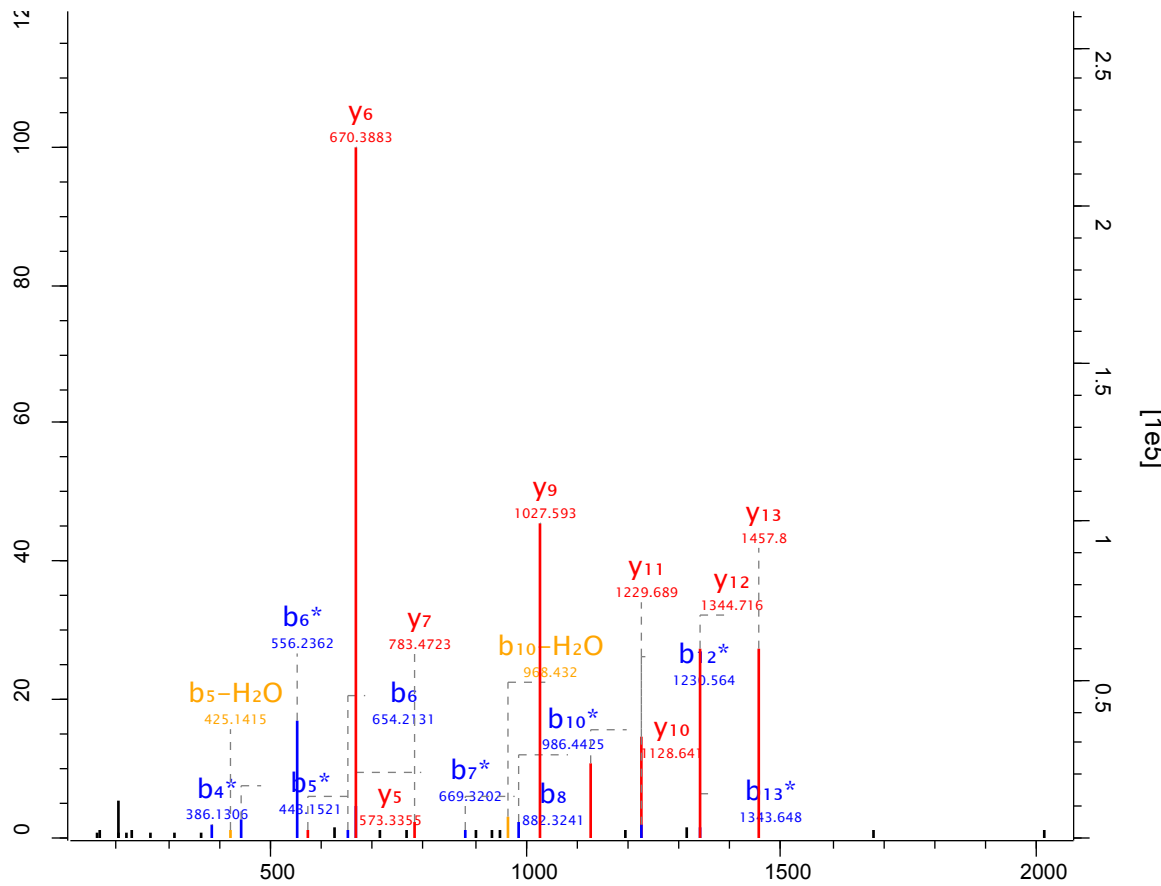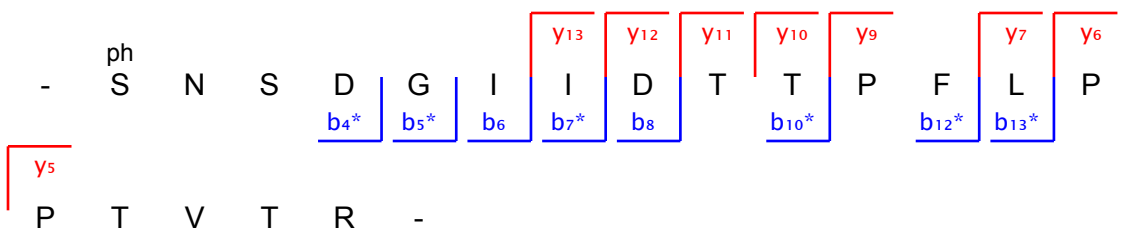

Raw file Scan Method Score m/z  
 Recip\_2\_34\_38 37705 FTMS; HCD 196 945.48

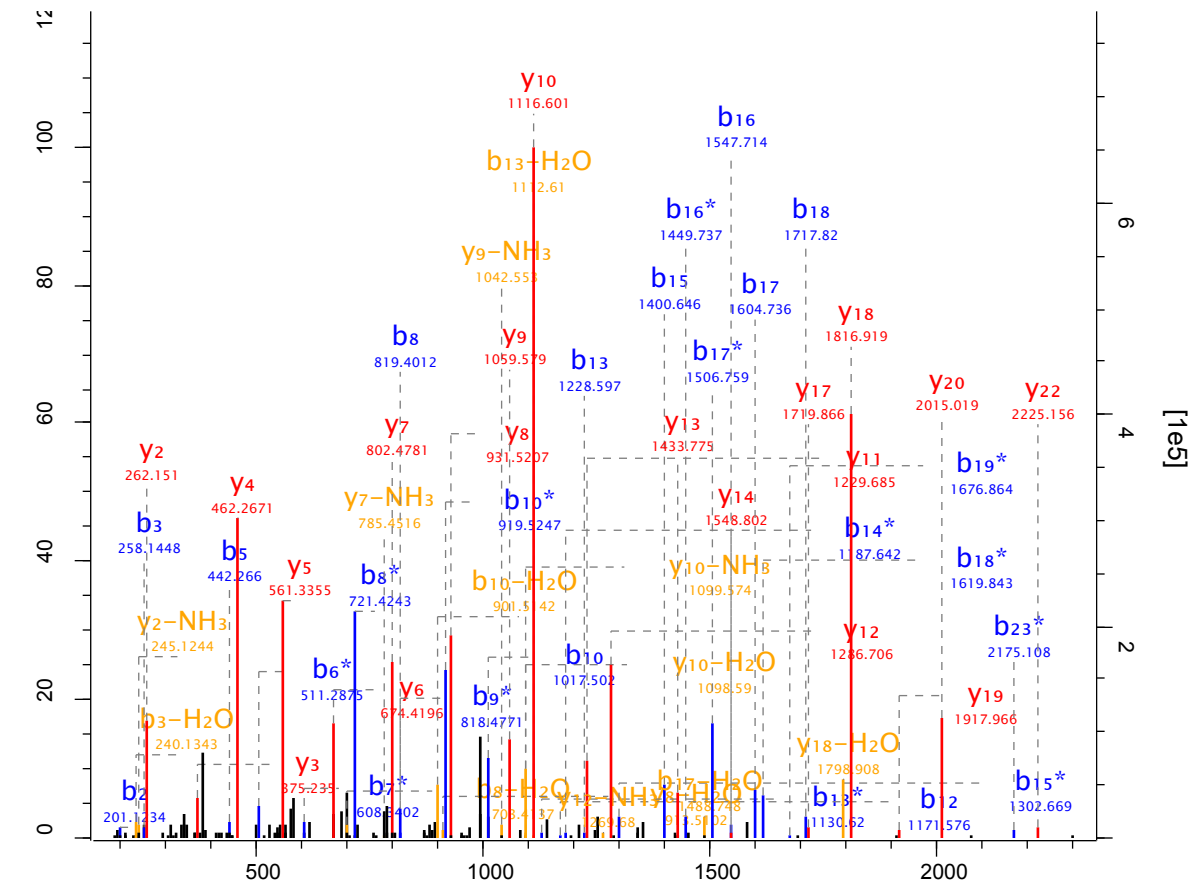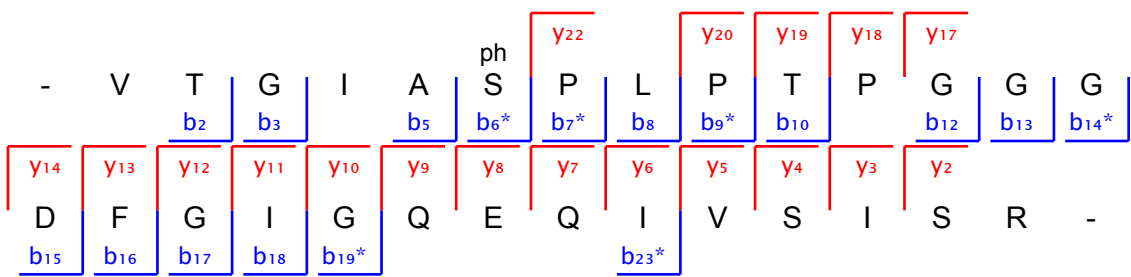

Raw file Scan Method Score m/z  
 Recip\_2\_34\_38 37707 FTMS; HCD 102.21 1053.84

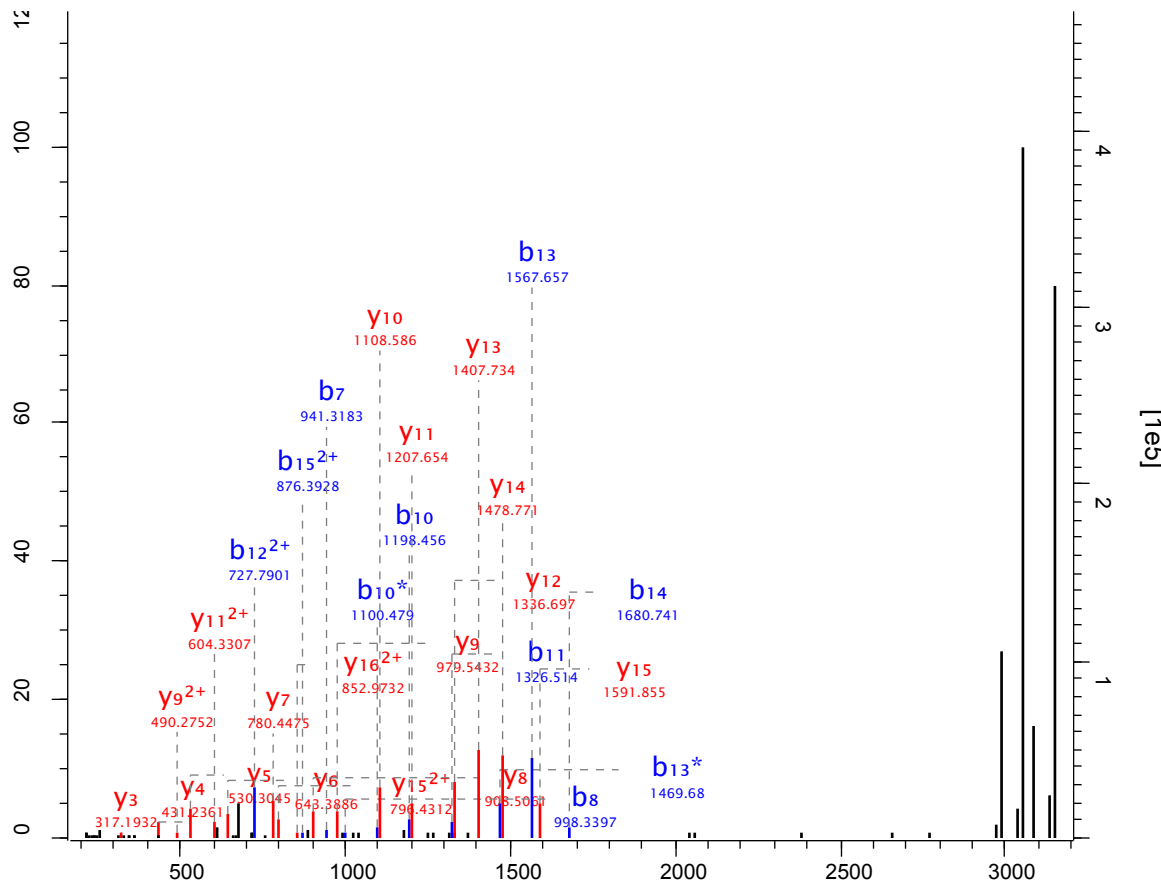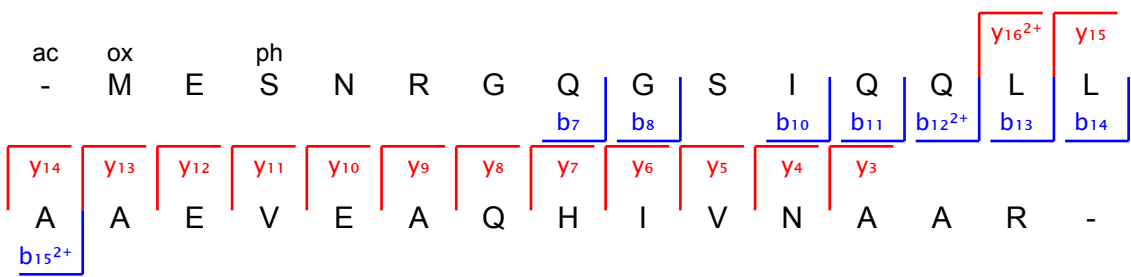

Raw file Scan Method Score m/z  
 Recip\_2\_34\_38 3820 FTMS; HCD 150.12 654.78

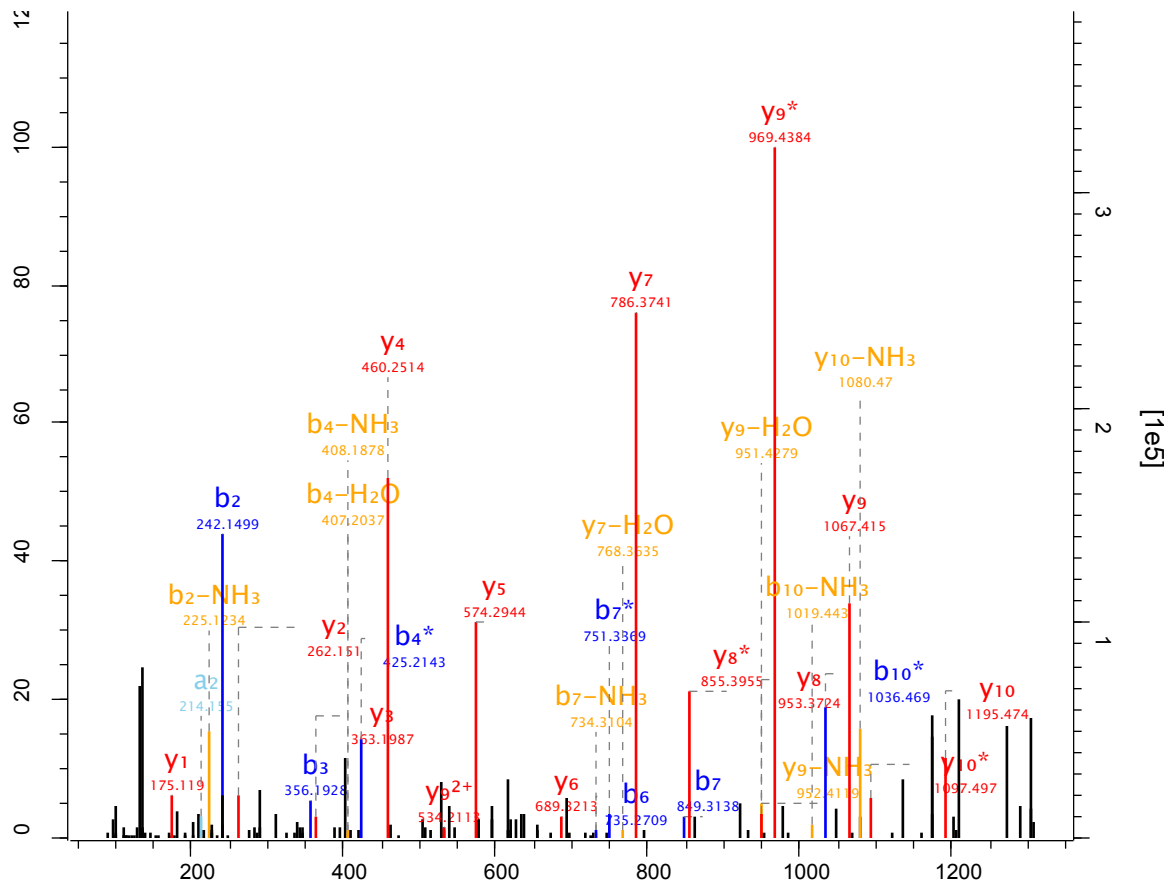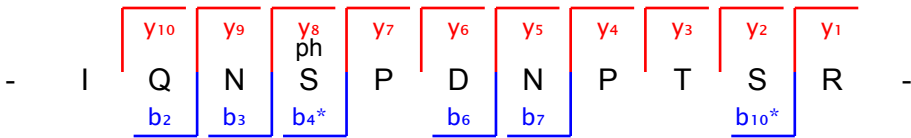

Raw file Scan Method Score m/z  
 Recip\_2\_34\_38 38819 FTMS; HCD 42.35 877.44

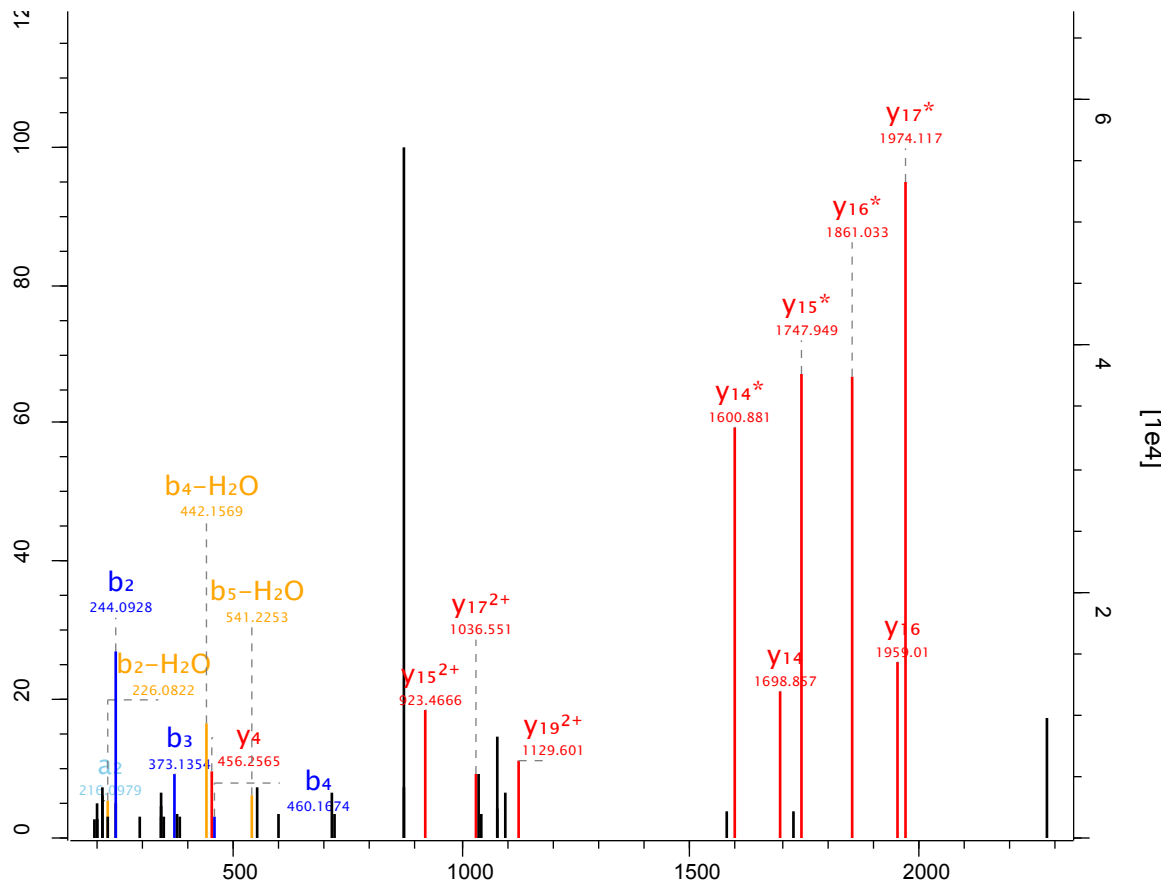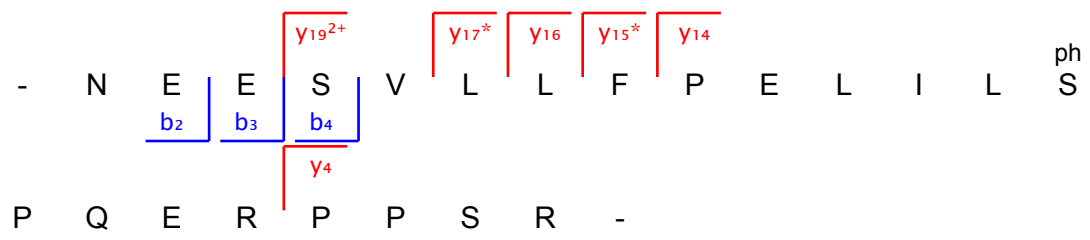

Raw file Scan Method Score m/z  
 Recip\_2\_34\_38 3905 FTMS; HCD 114.01 693.77

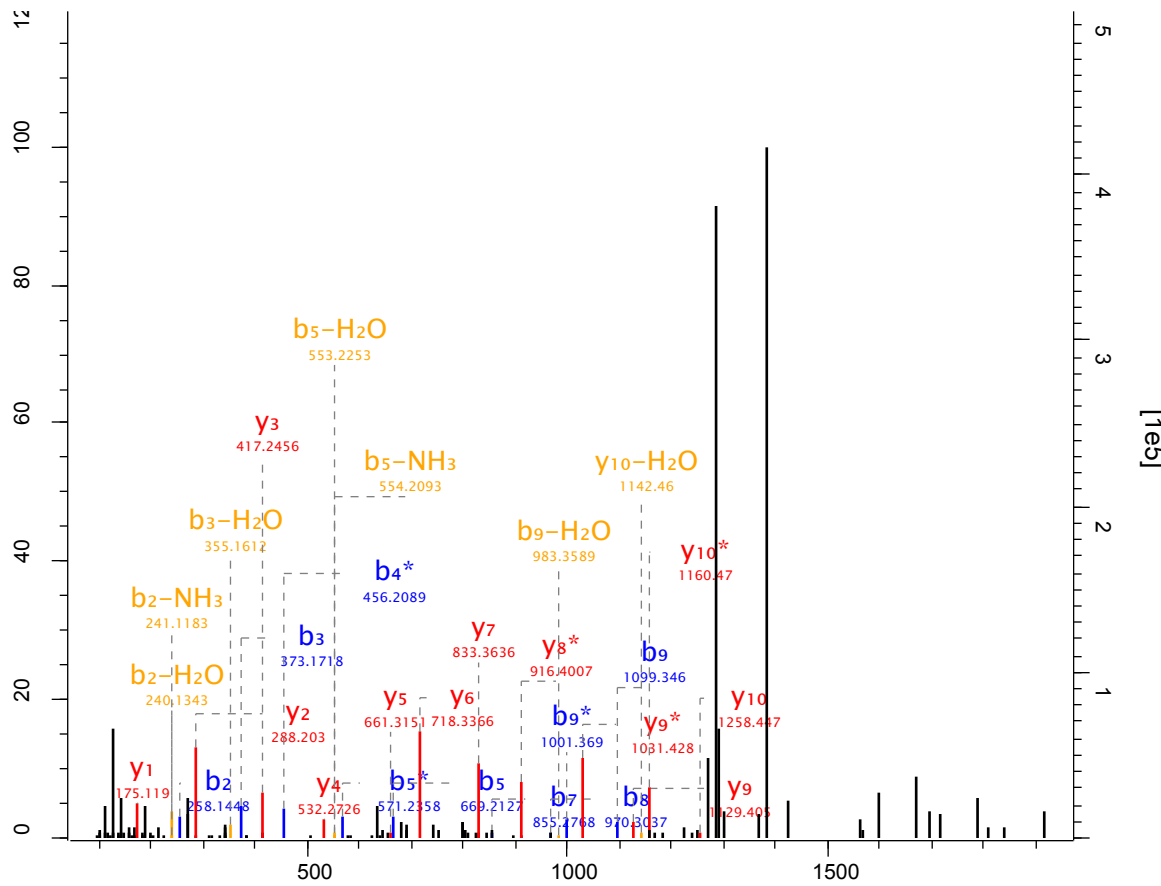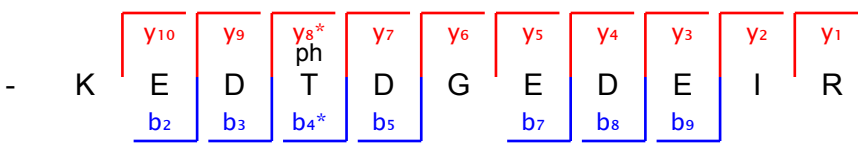

Raw file Scan Method Score m/z  
 Recip\_2\_34\_38 39815 FTMS; HCD 84.15 908.4

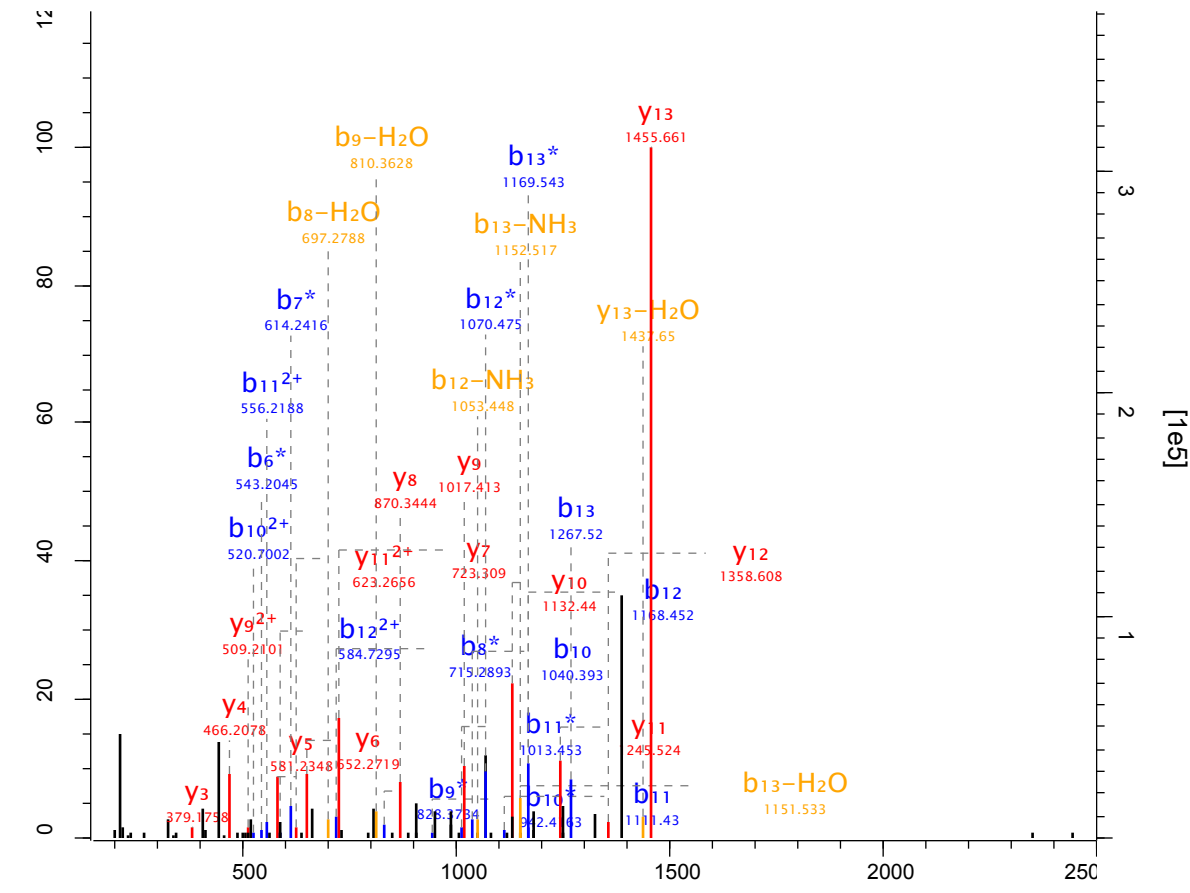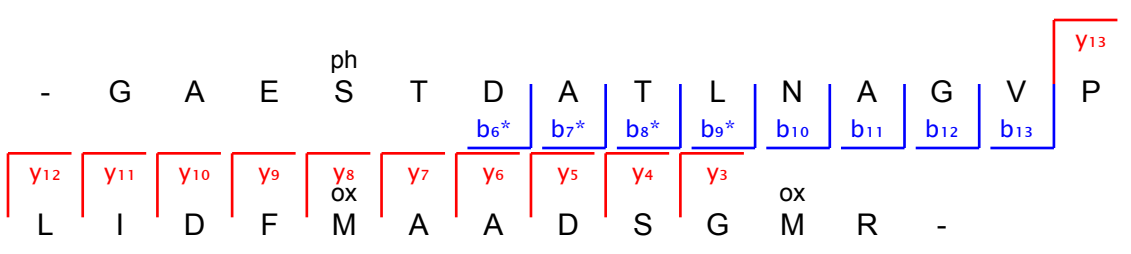

Raw file Scan Method Score m/z  
 Recip\_2\_34\_38 40908 FTMS; HCD 271.66 1086.94

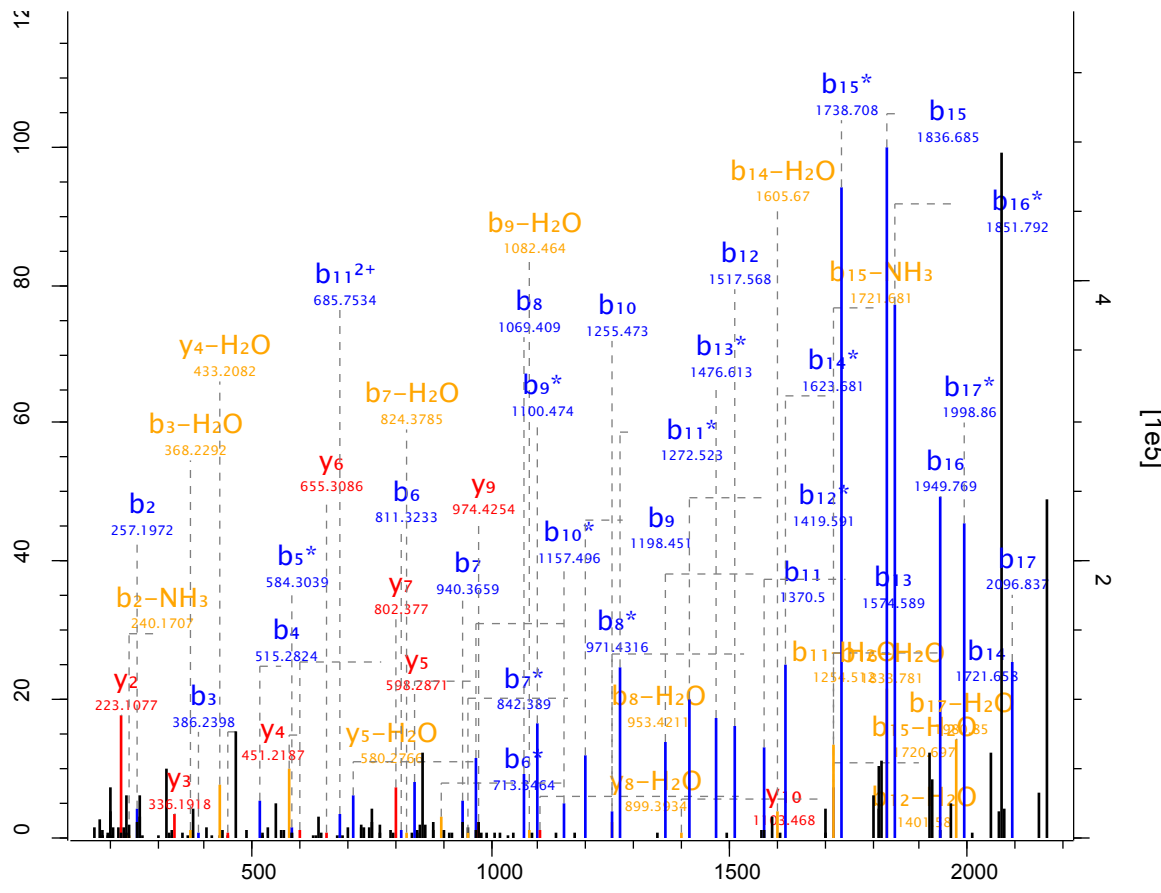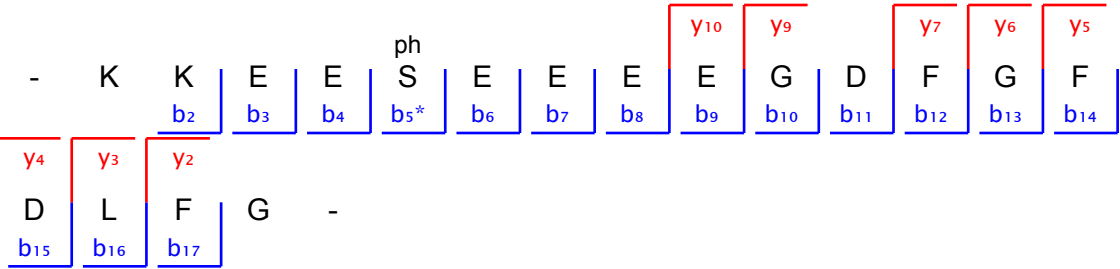



Raw file Scan Method Score m/z  
 Recip\_2\_34\_38 41401 FTMS; HCD 54.93 1006.16

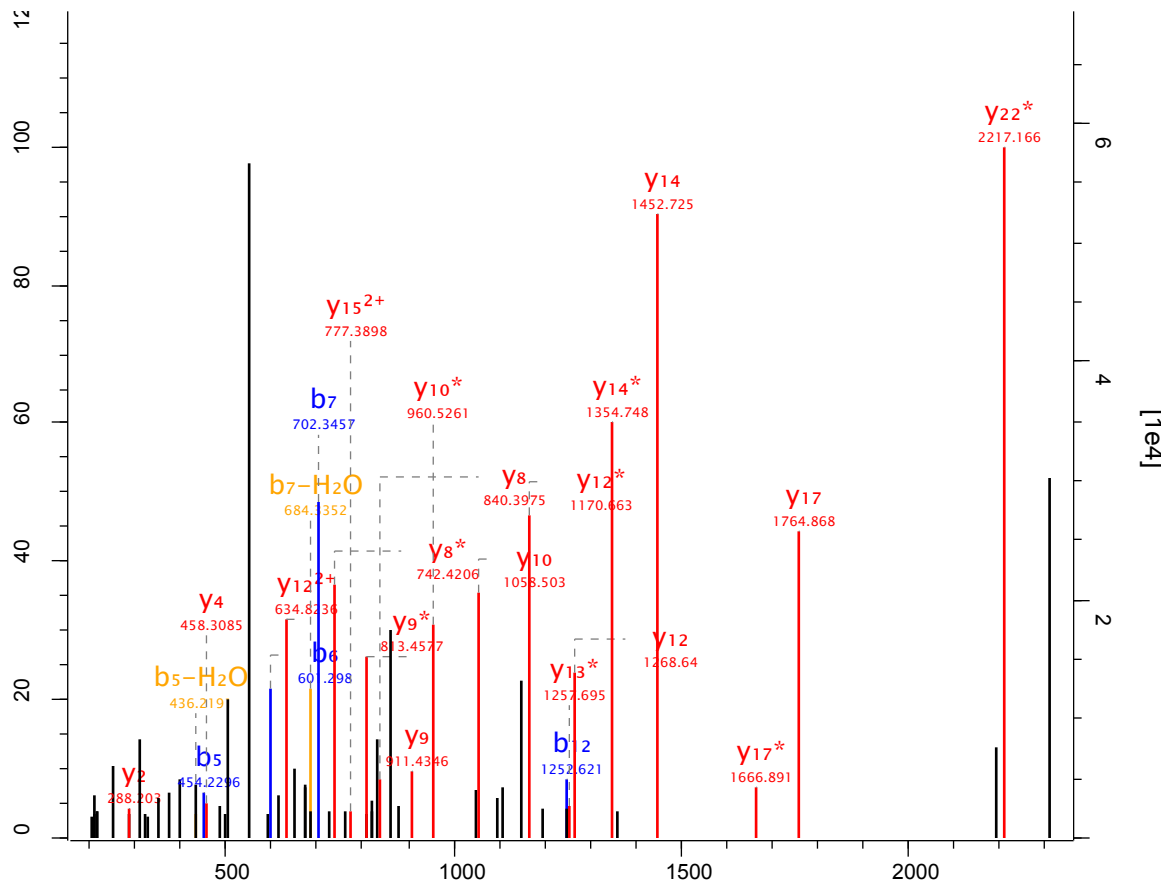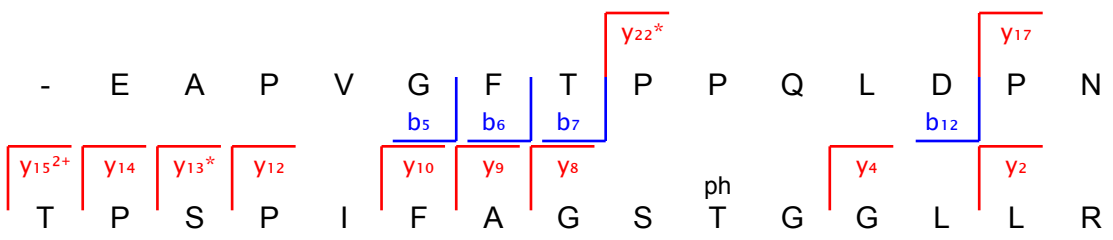

T P S P I F A G S ph T G G L L R

| Raw file      | Scan | Method    | Score | m/z    |
|---------------|------|-----------|-------|--------|
| Recip_2_34_38 | 4154 | FTMS; HCD | 49.3  | 658.75 |

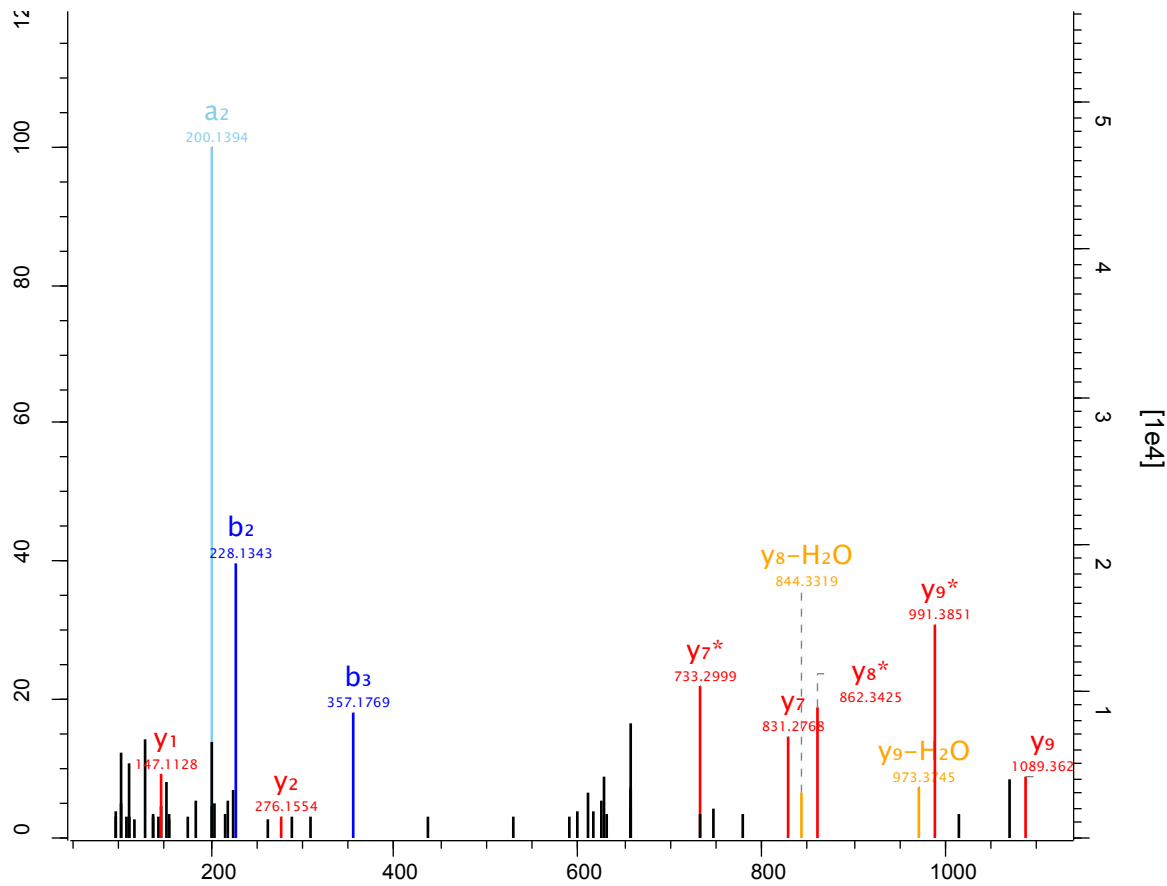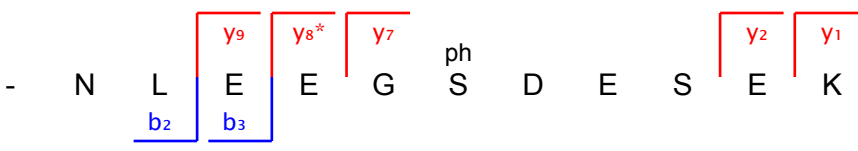

Raw file Scan Method Score m/z  
 Recip\_2\_34\_38 41791 FTMS; HCD 63.46 765.86

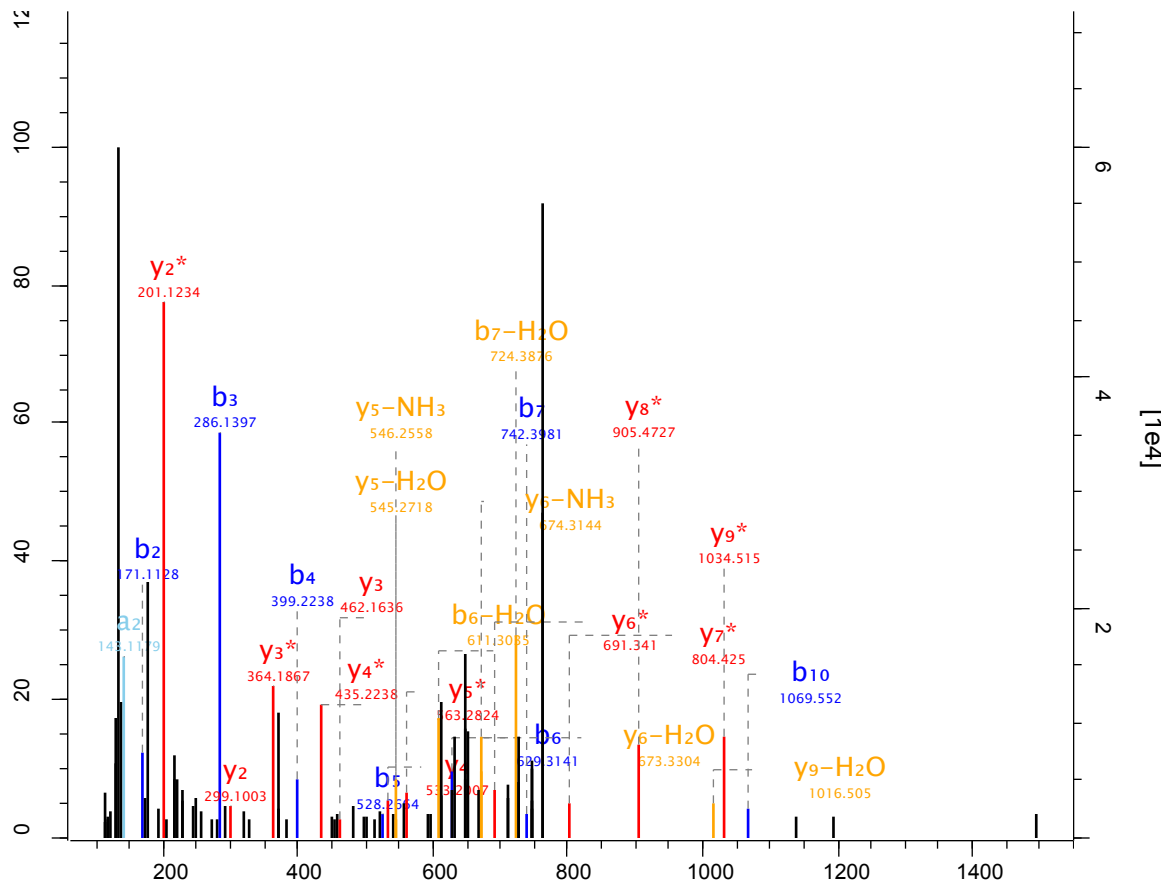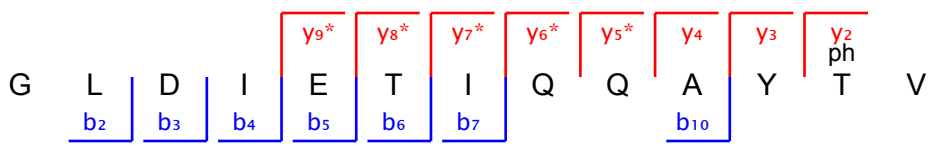

Raw file Scan Method m/z  
 Recip\_2\_34\_38 41951 FTMS; HCD 76.89 1067.5

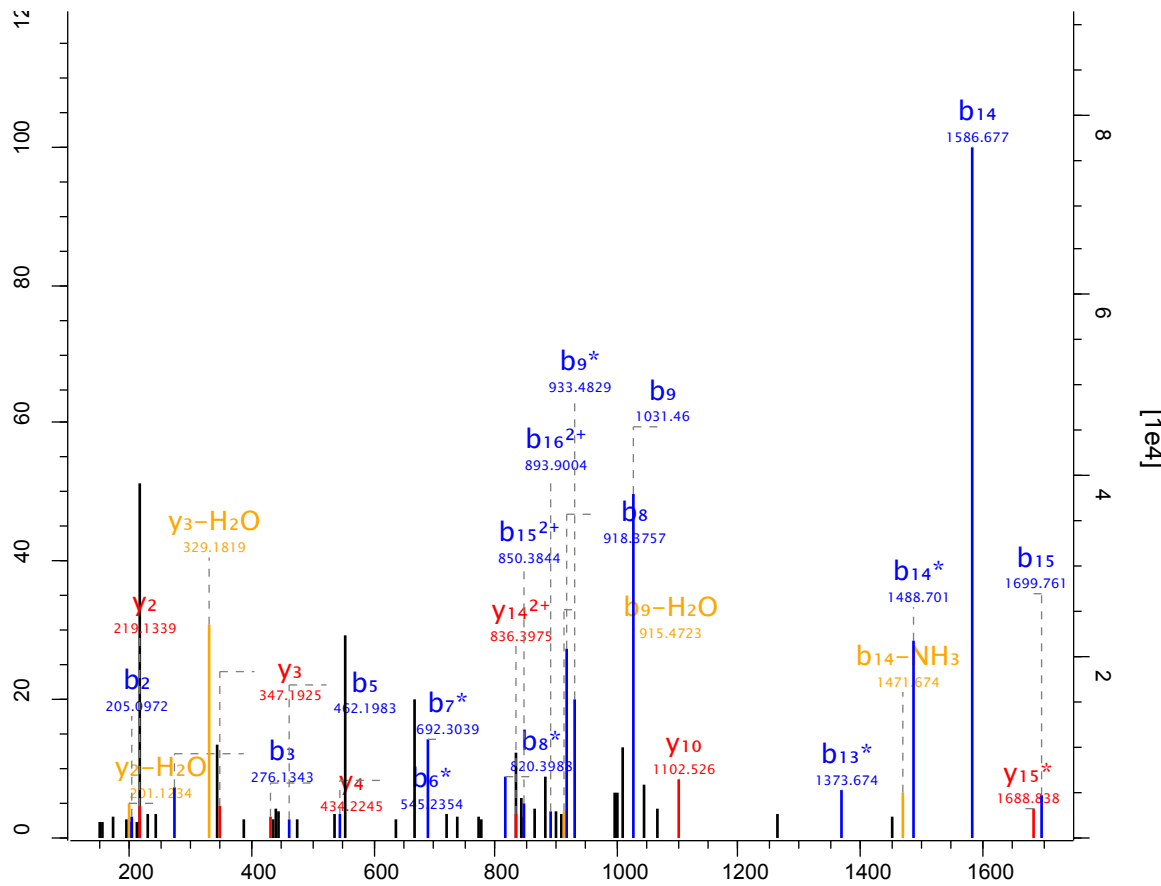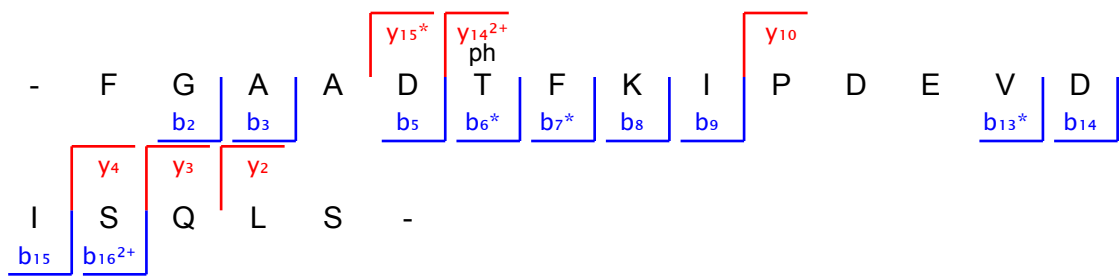

Raw file Scan Method Score m/z  
 Recip\_2\_34\_38 42036 FTMS; HCD 117.62 1063.45

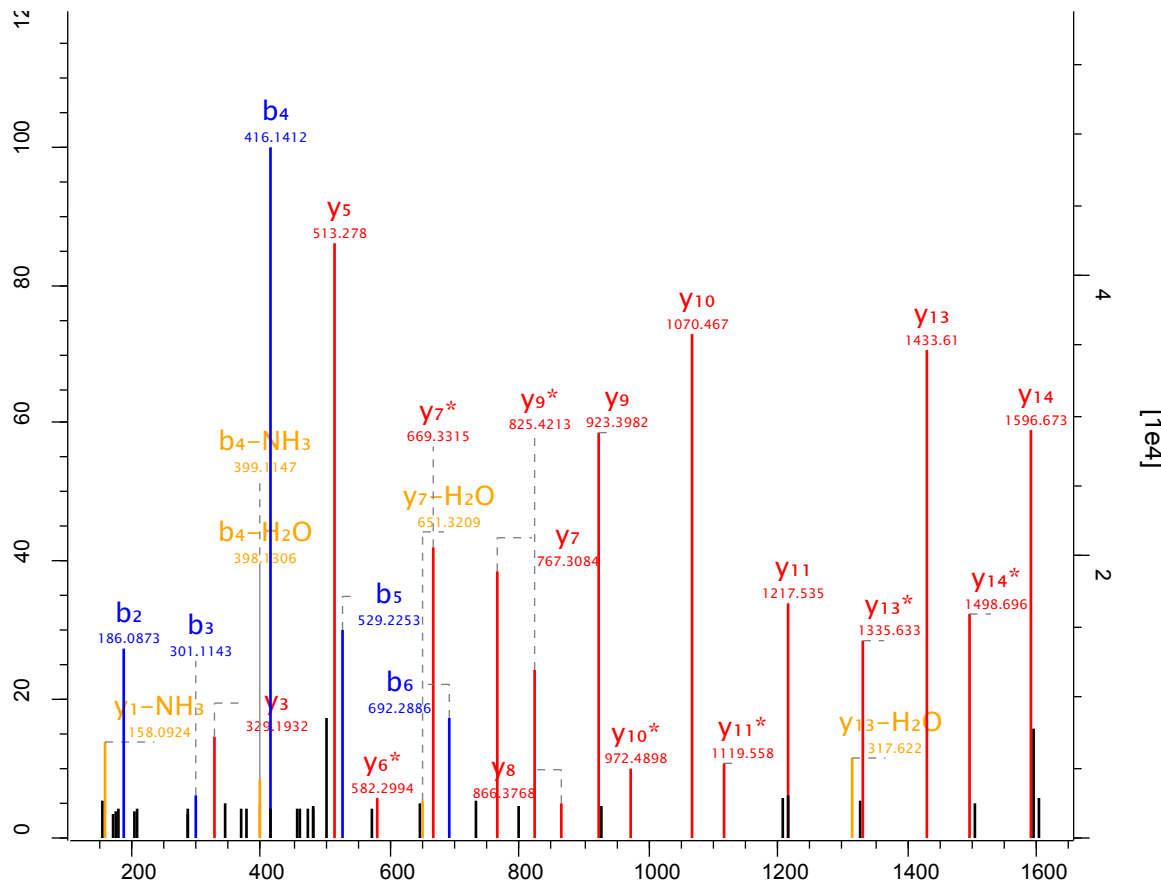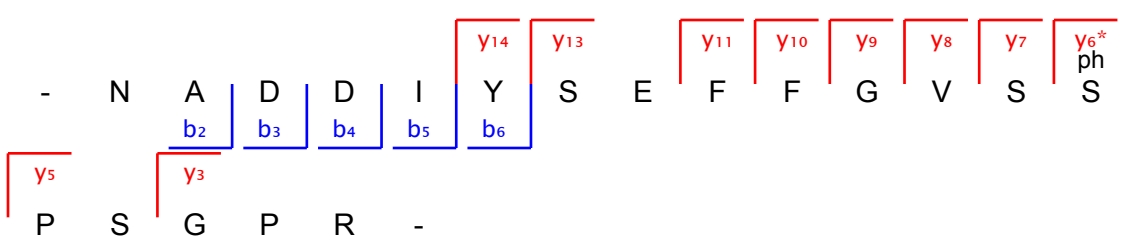

| Raw file      | Scan | Method    | Score | m/z   |
|---------------|------|-----------|-------|-------|
| Recip_2_34_38 | 4229 | FTMS; HCD | 77.18 | 661.8 |

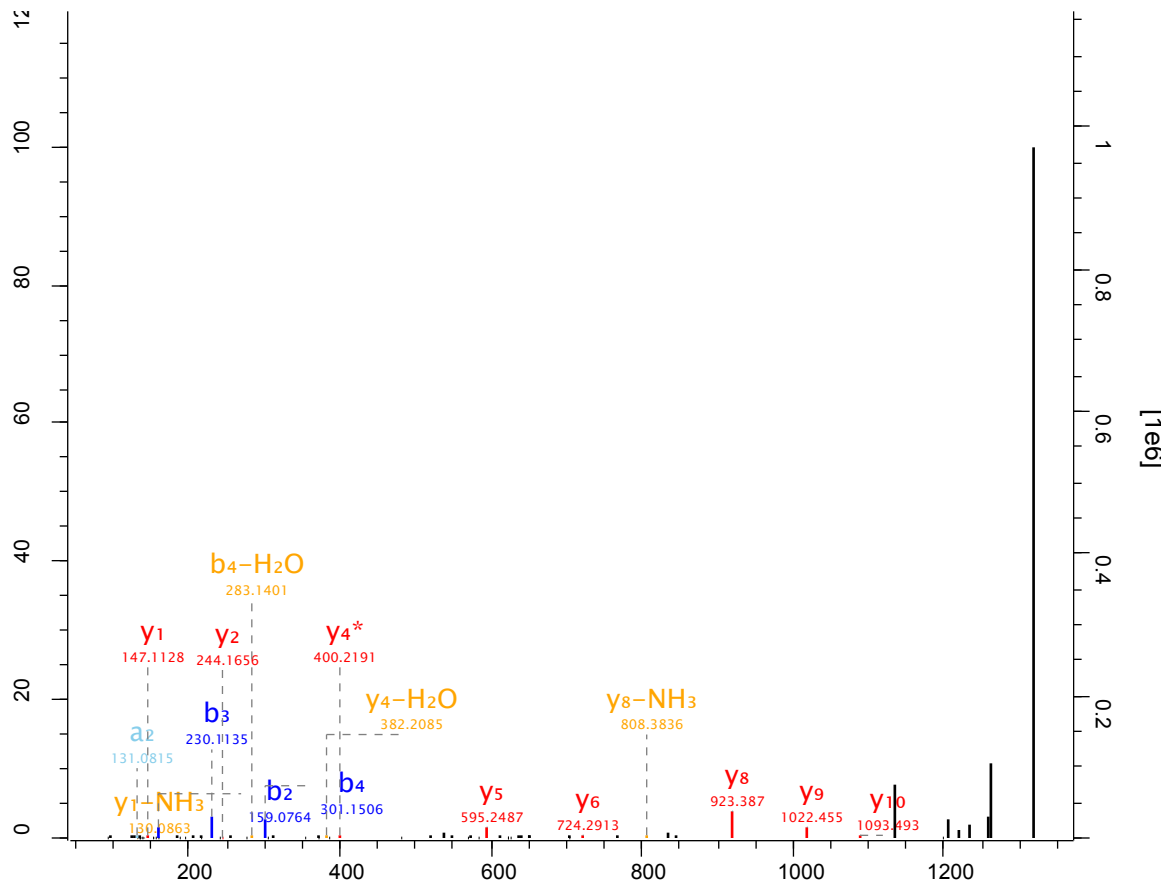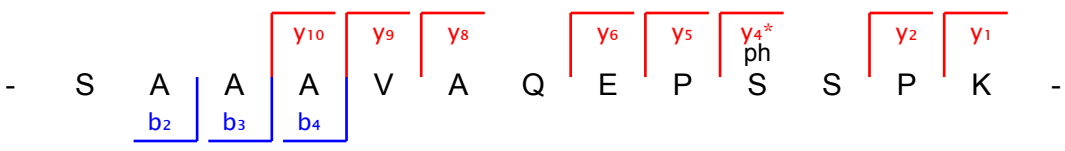

Raw file Scan Method Score m/z  
 Recip\_2\_34\_38 42495 FTMS; HCD 46.66 928.43

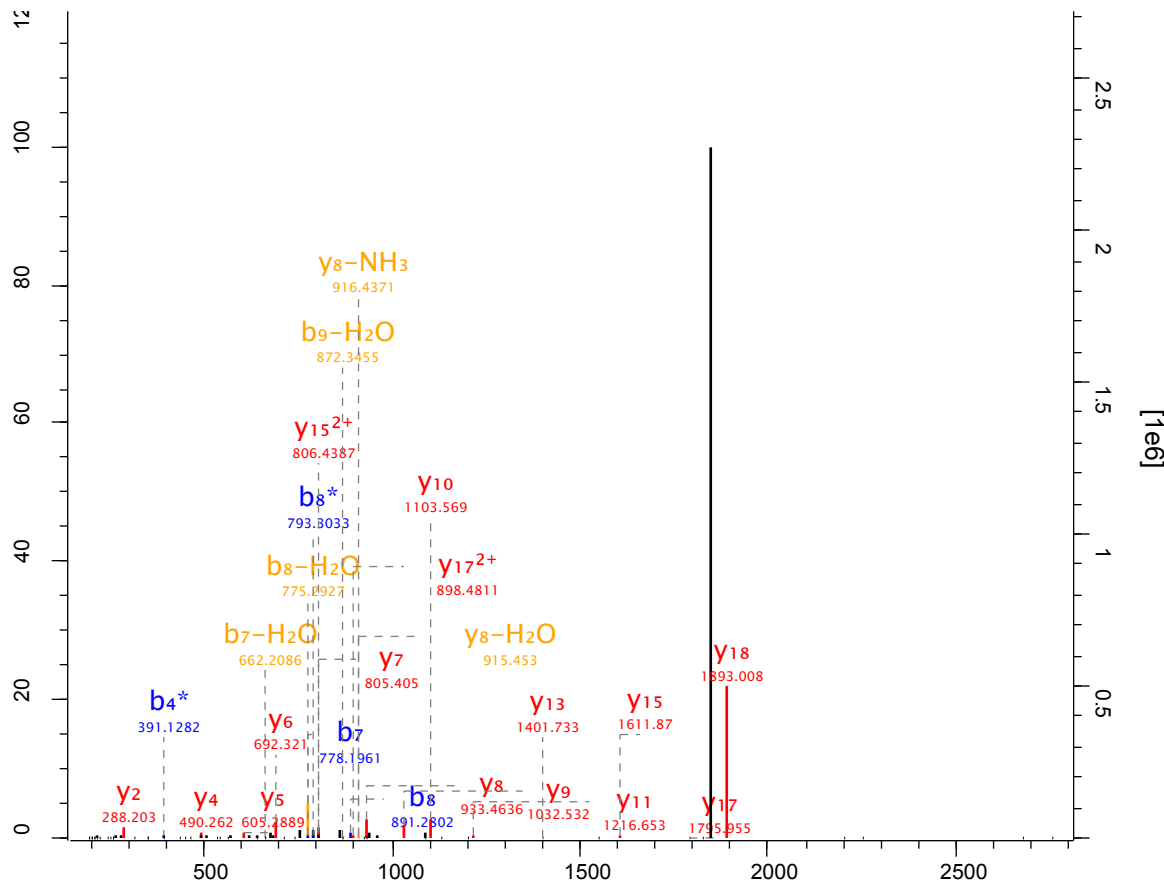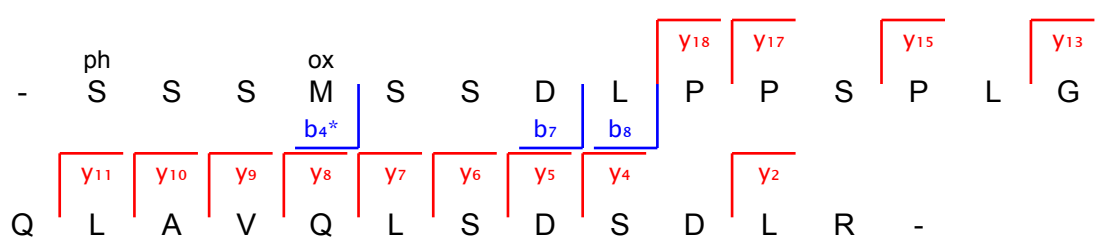

Raw file Scan Method Score m/z  
 Recip\_2\_34\_38 42752 FTMS; HCD 78.04 1036.52

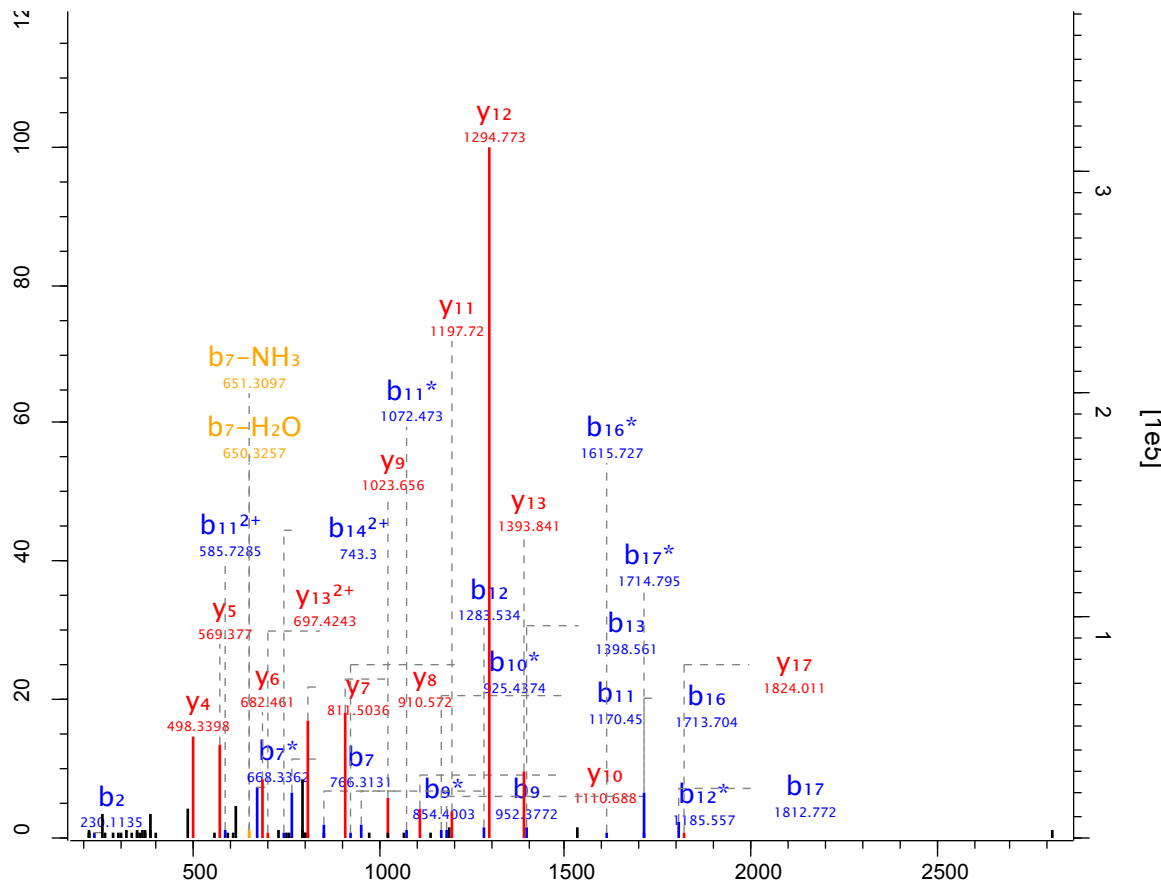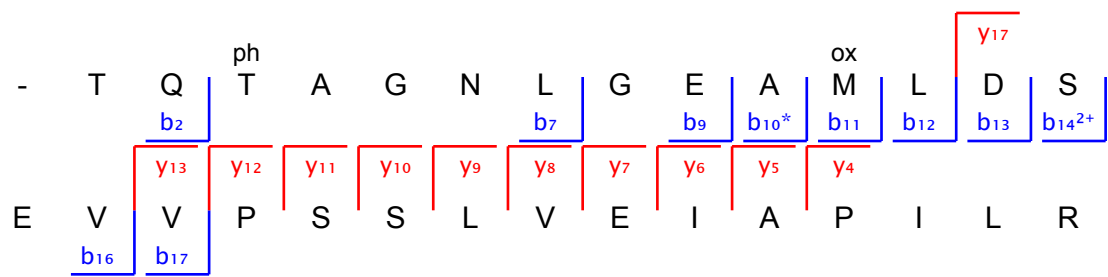



Raw file Scan Method Score m/z  
 Recip\_2\_34\_38 4299 FTMS; HCD 232.59 697.77

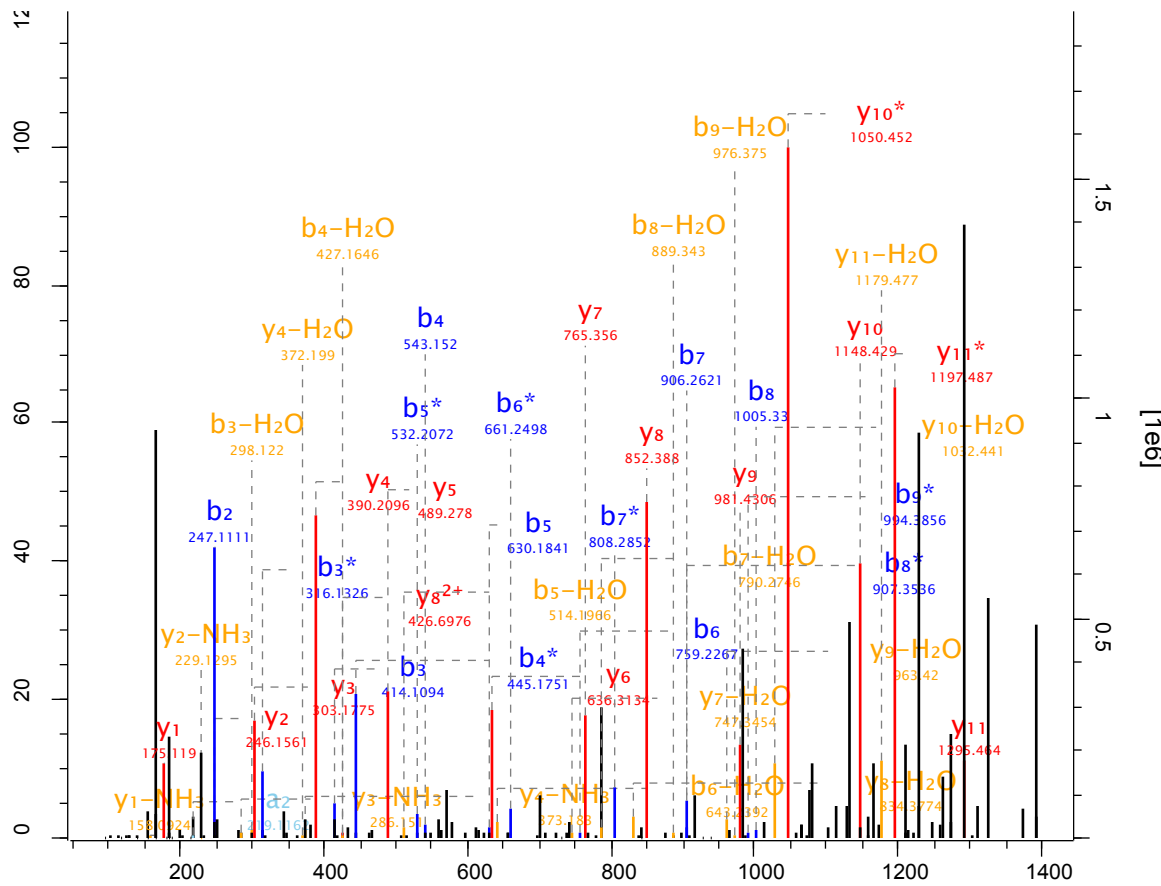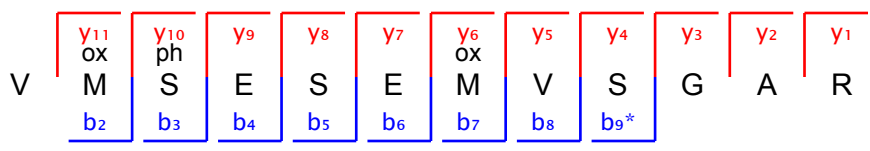

| Raw file      | Scan | Method    | Score | m/z    |
|---------------|------|-----------|-------|--------|
| Recip_2_34_38 | 4305 | FTMS; HCD | 91.62 | 584.75 |

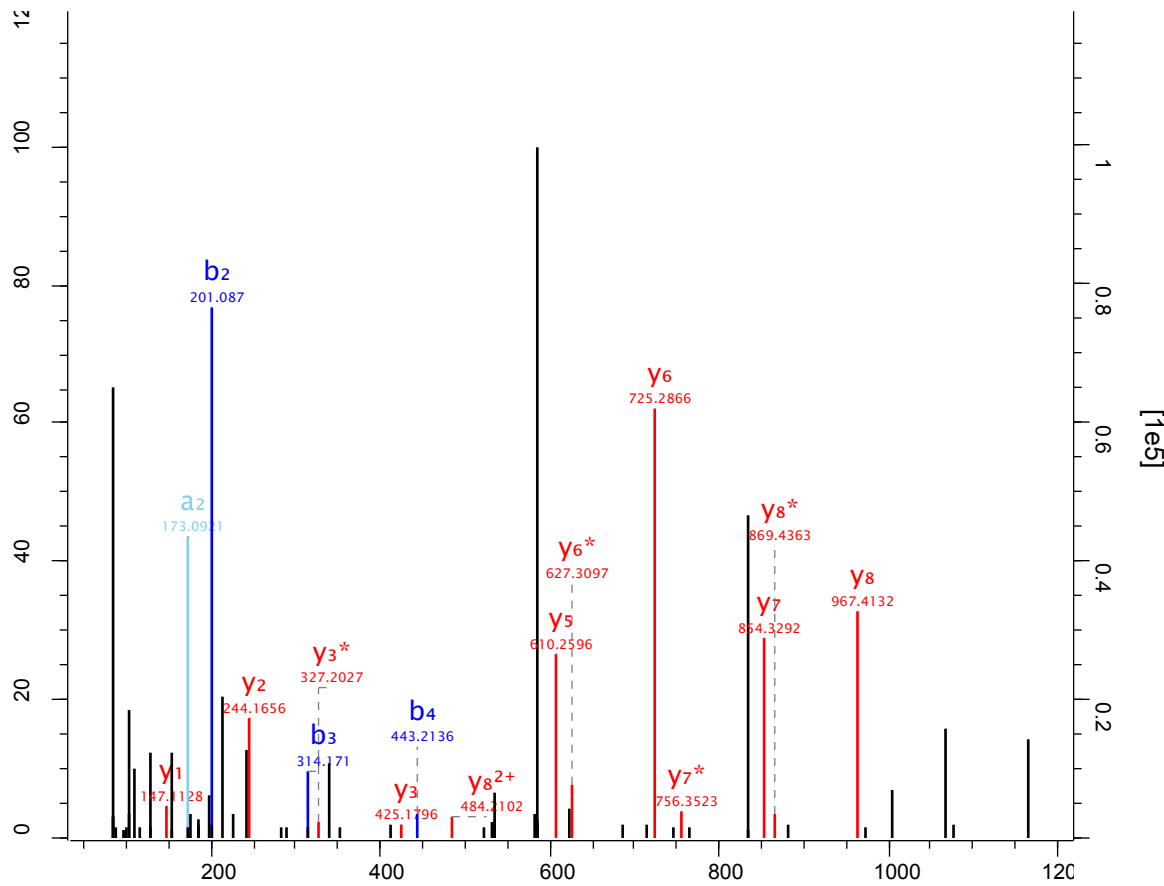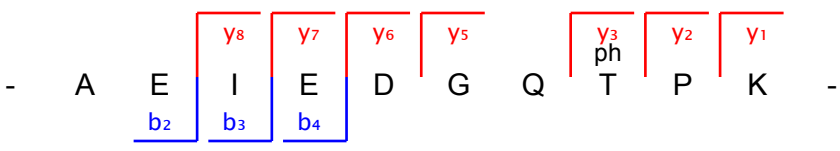

| Raw file      | Scan | Method    | Score | m/z    |
|---------------|------|-----------|-------|--------|
| Recip_2_34_38 | 4416 | FTMS; HCD | 63.43 | 426.72 |

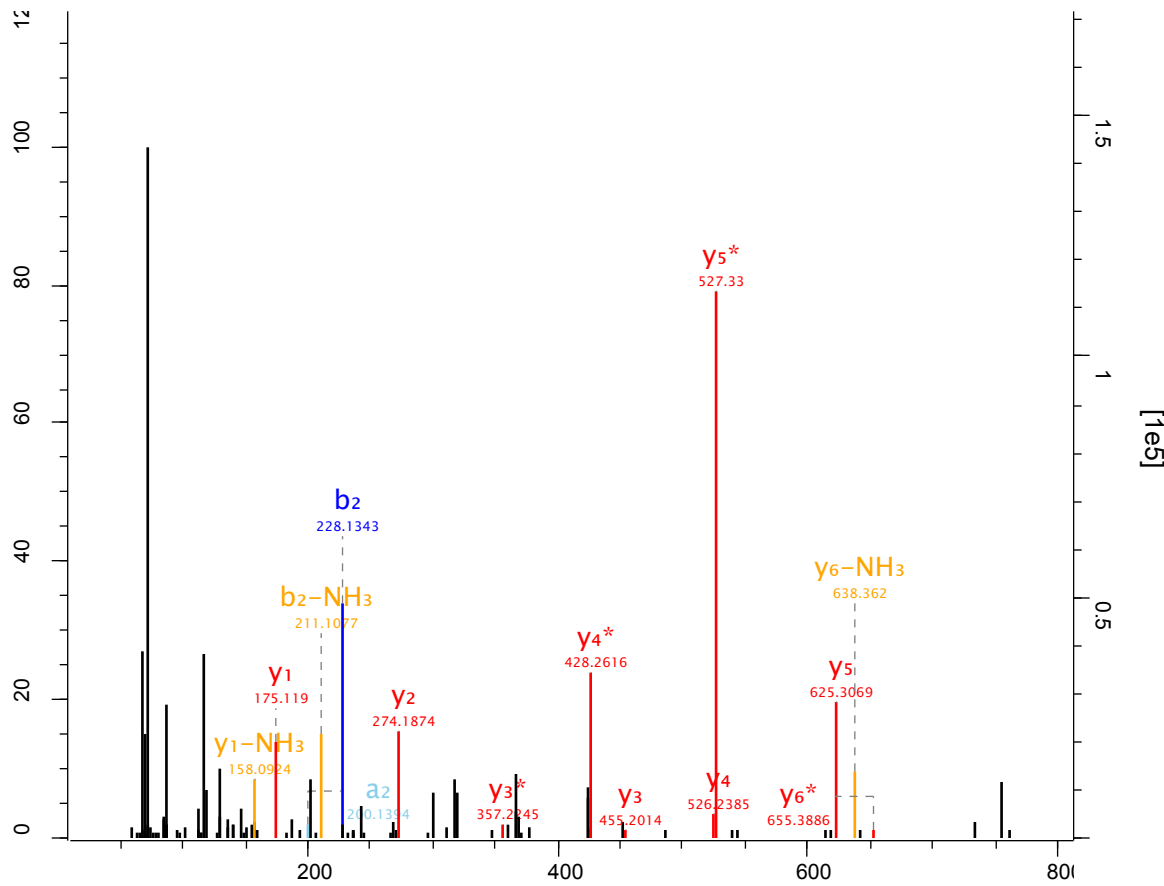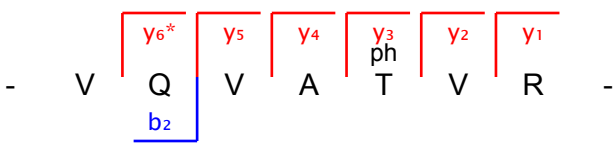

| Raw file      | Scan | Method    | Score | m/z    |
|---------------|------|-----------|-------|--------|
| Recip_2_34_38 | 4476 | FTMS; HCD | 57.8  | 596.23 |

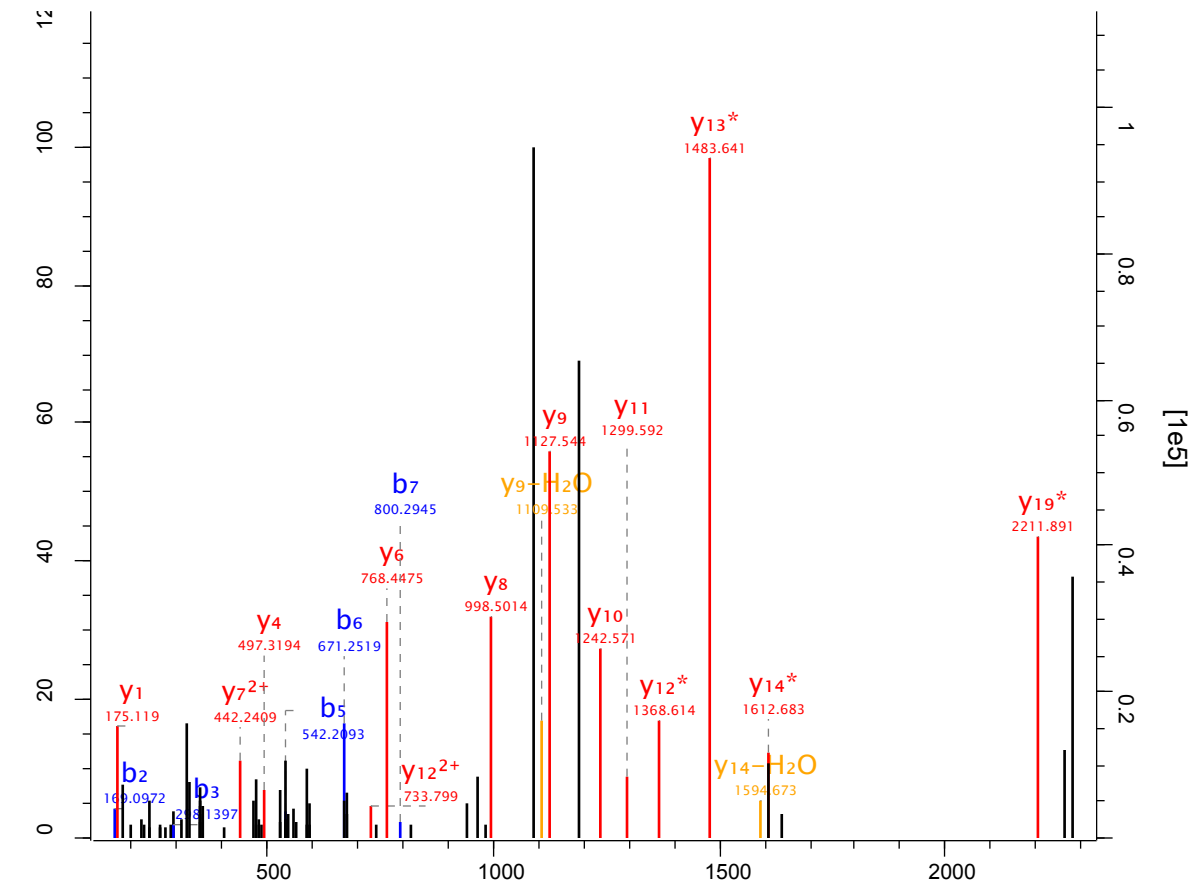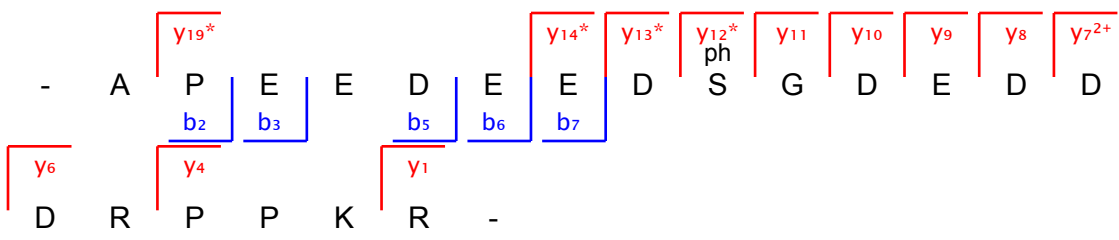

| Raw file      | Scan | Method    | Score | m/z    |
|---------------|------|-----------|-------|--------|
| Recip_2_34_38 | 4562 | FTMS; HCD | 88.27 | 404.19 |

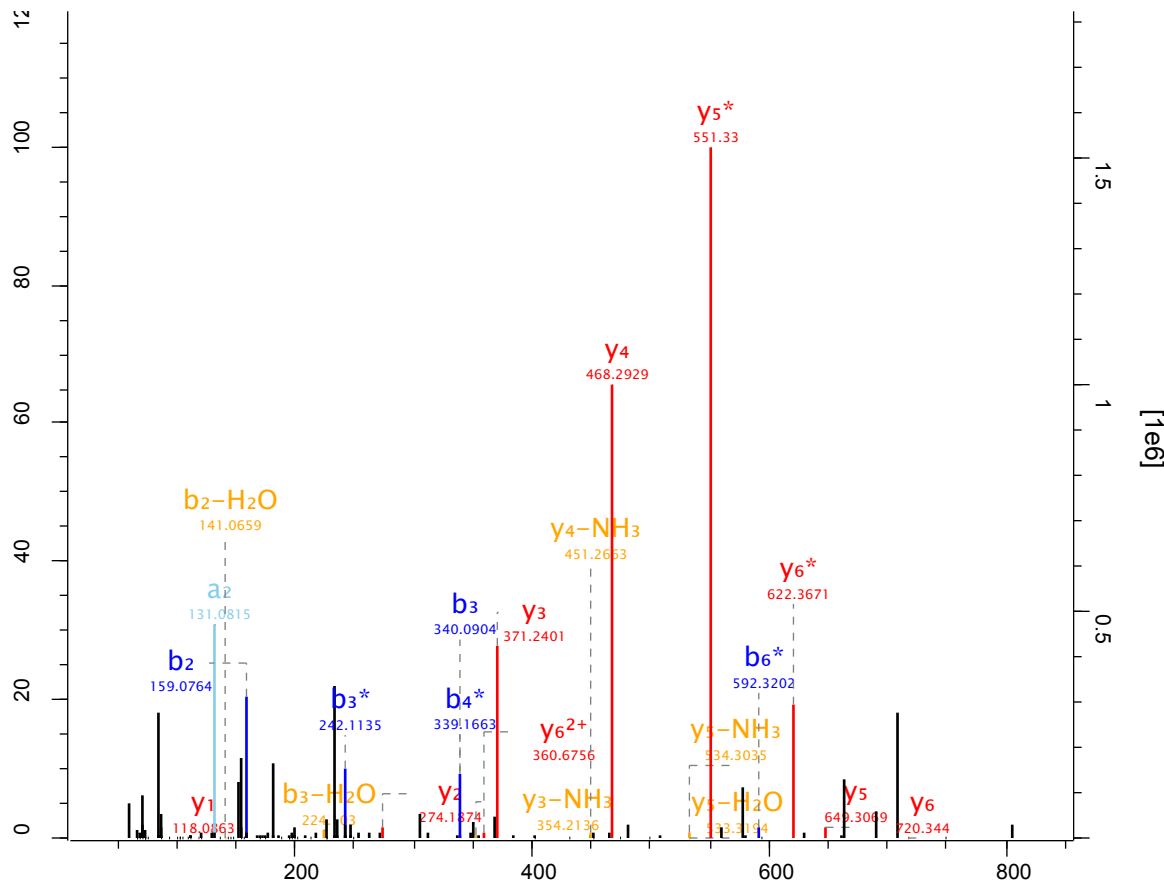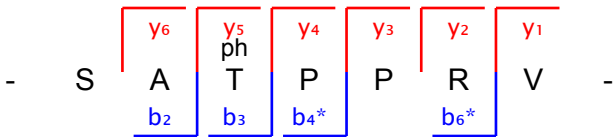

| Raw file      | Scan | Method    | Score | m/z    |
|---------------|------|-----------|-------|--------|
| Recip_2_34_38 | 4758 | FTMS; HCD | 61.24 | 571.75 |

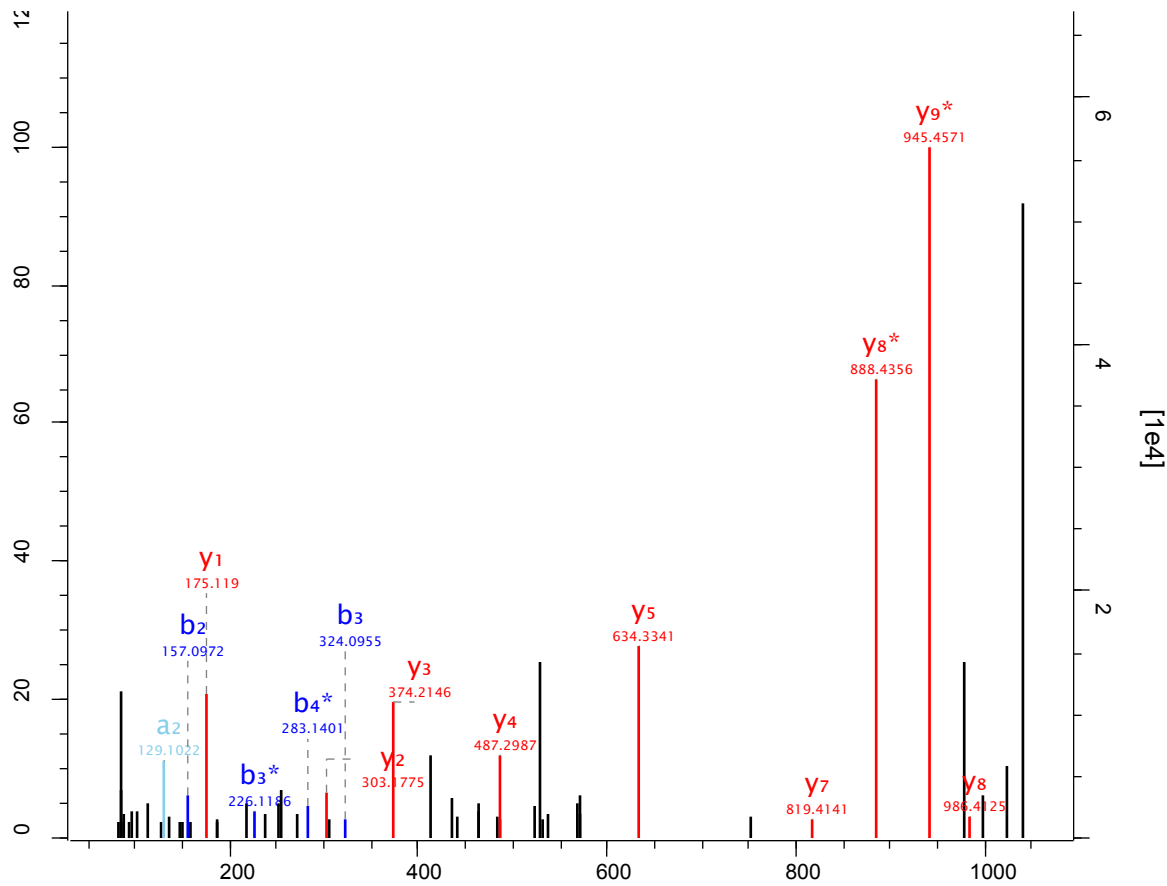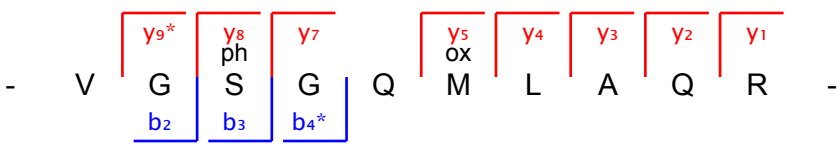

| Raw file      | Scan | Method    | Score | m/z    |
|---------------|------|-----------|-------|--------|
| Recip_2_34_38 | 4822 | FTMS; HCD | 59.25 | 734.32 |

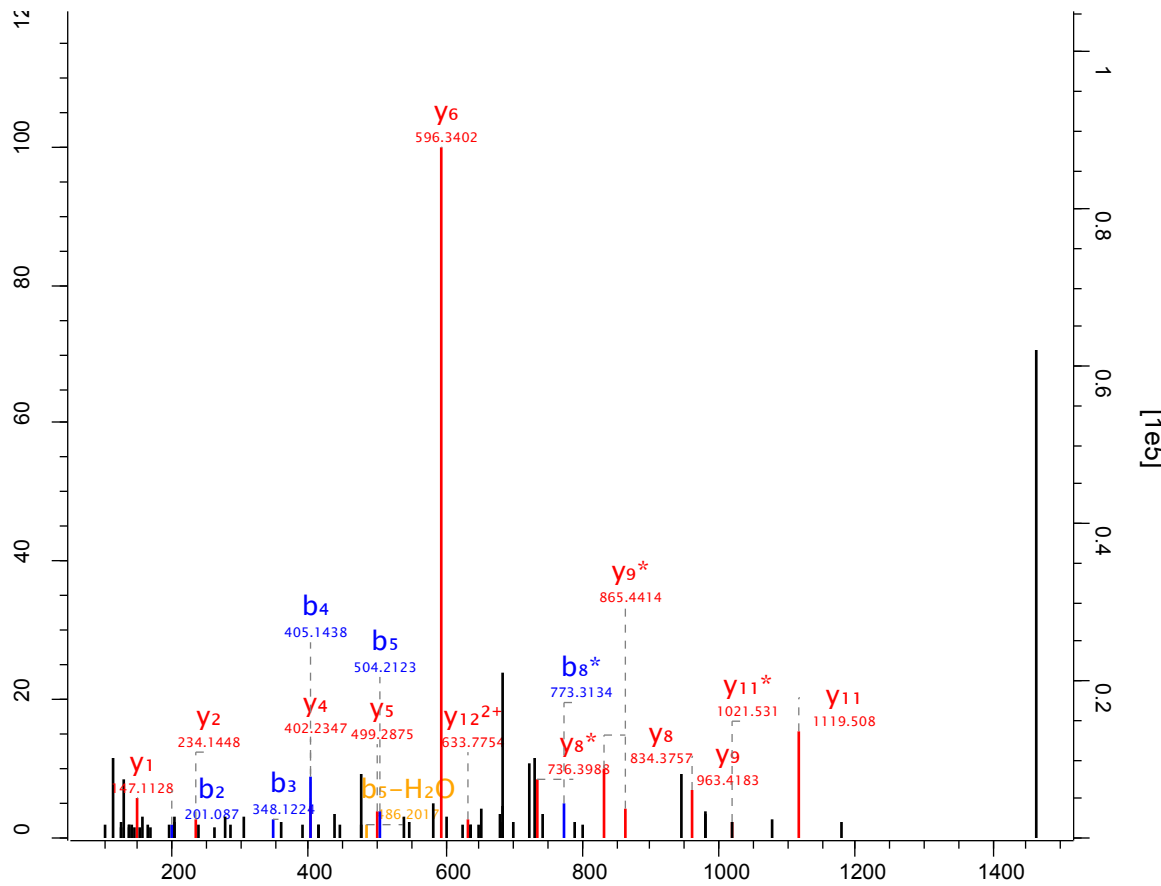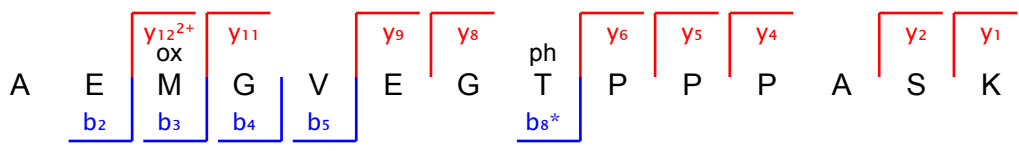

Raw file Scan Method Score m/z  
 Recip\_2\_34\_38 4917 FTMS; HCD 132.79 804.3

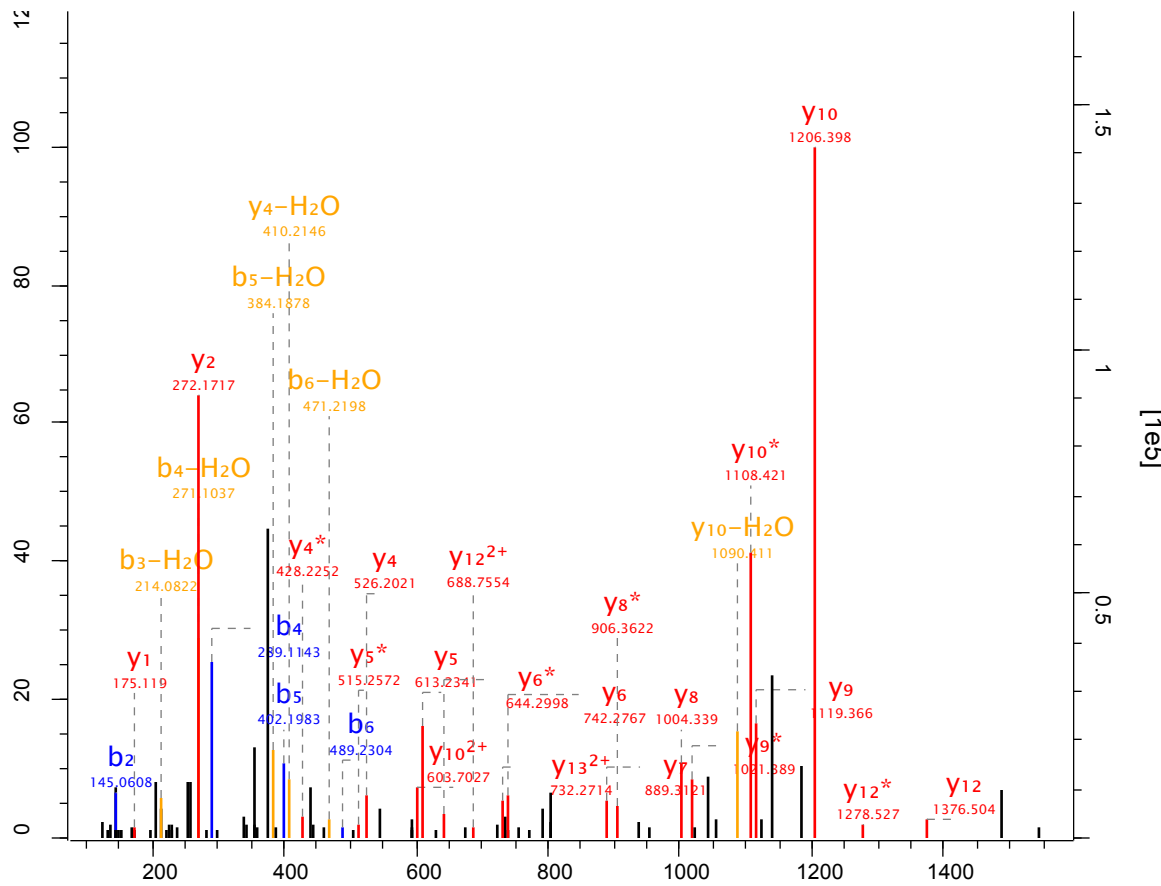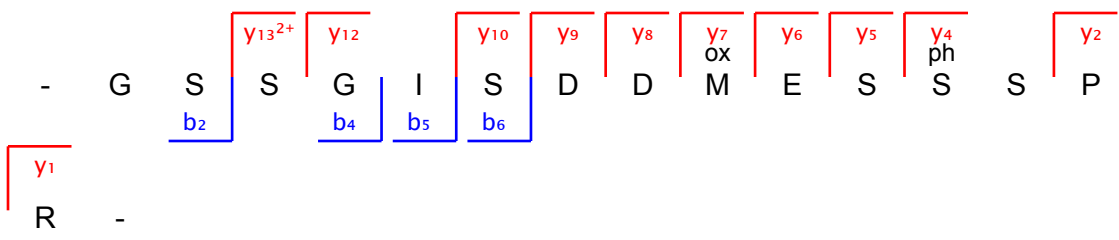



Raw file Scan Method Score m/z  
 Recip\_2\_34\_38 4935 FTMS; HCD 63.09 557.25

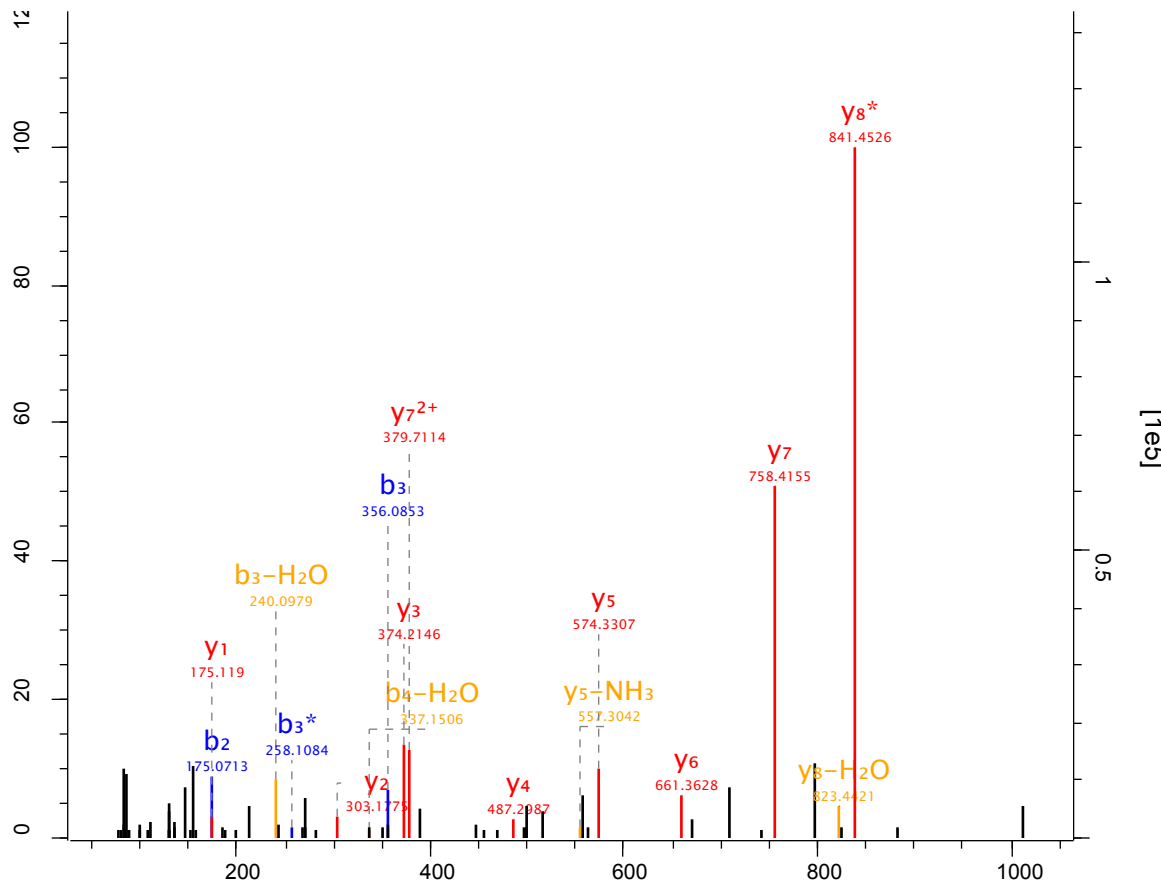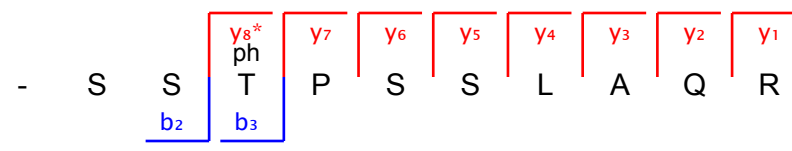

| Raw file      | Scan | Method    | Score | m/z    |
|---------------|------|-----------|-------|--------|
| Recip_2_34_38 | 4970 | FTMS; HCD | 80.63 | 660.76 |

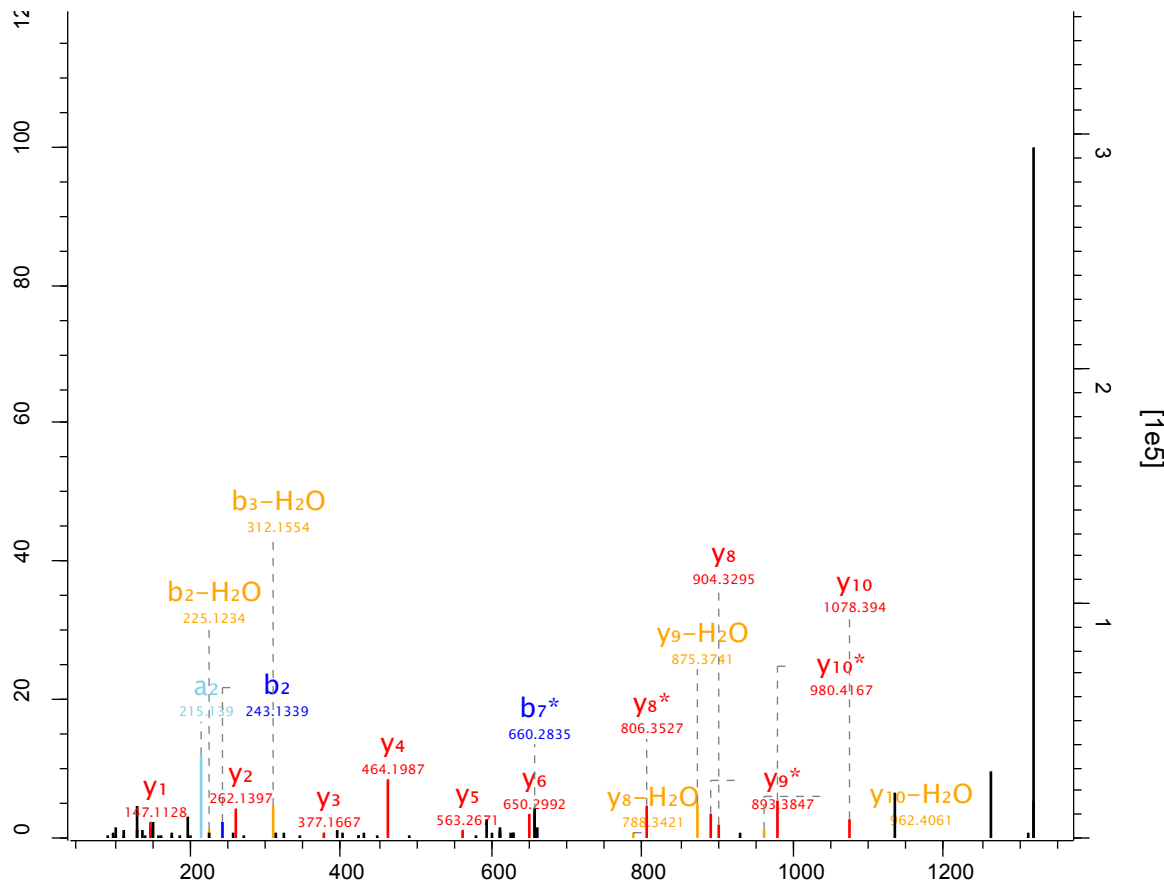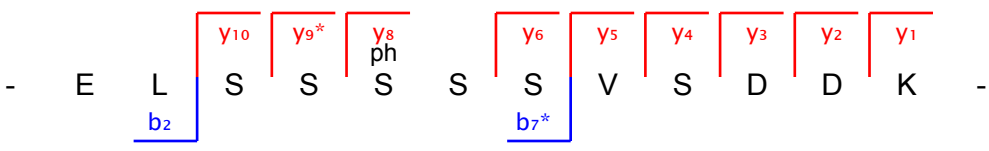

Raw file Scan Method Score m/z  
 Recip\_2\_34\_38 4983 FTMS; HCD 96.38 867.34

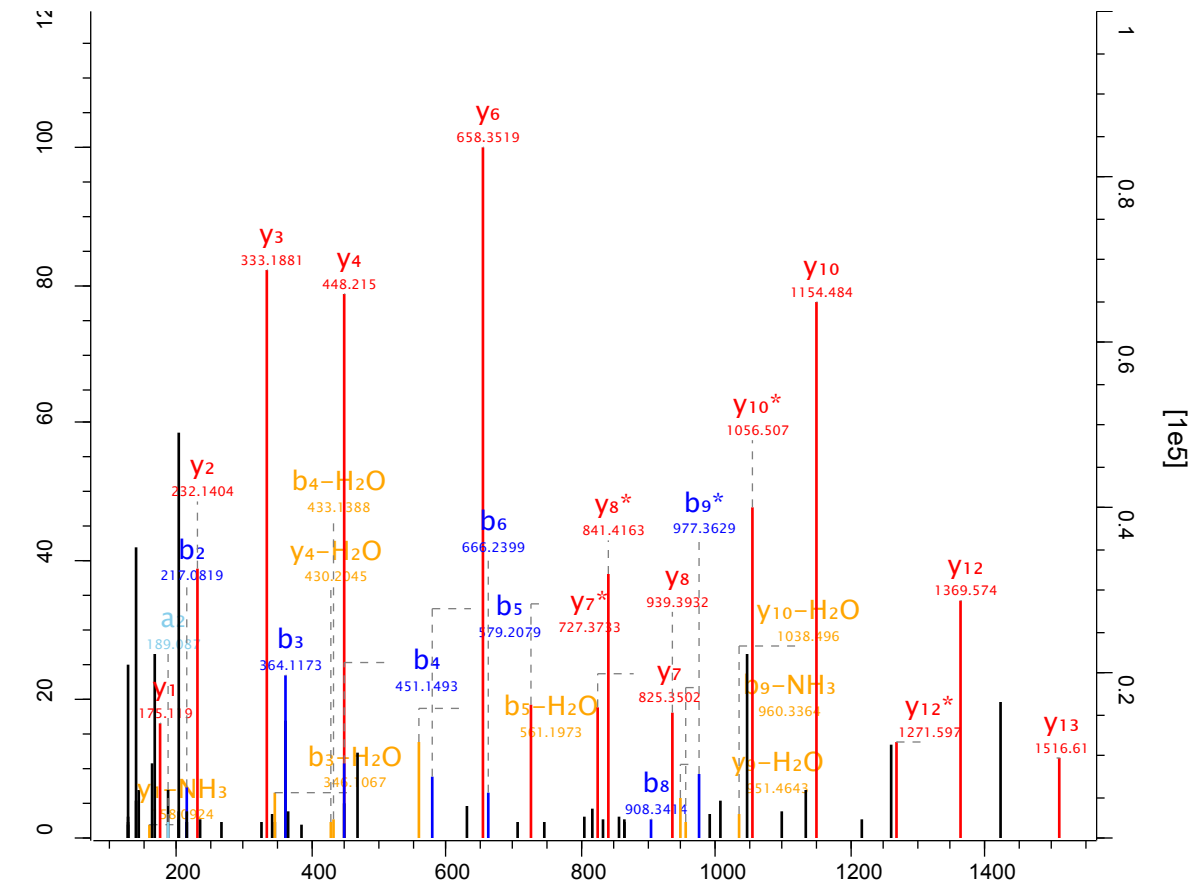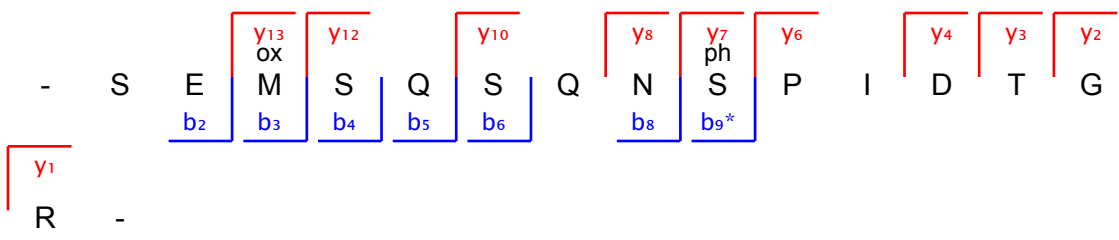

Raw file Scan Method Score m/z  
 Recip\_2\_34\_38 5116 FTMS; HCD 225.29 698.24

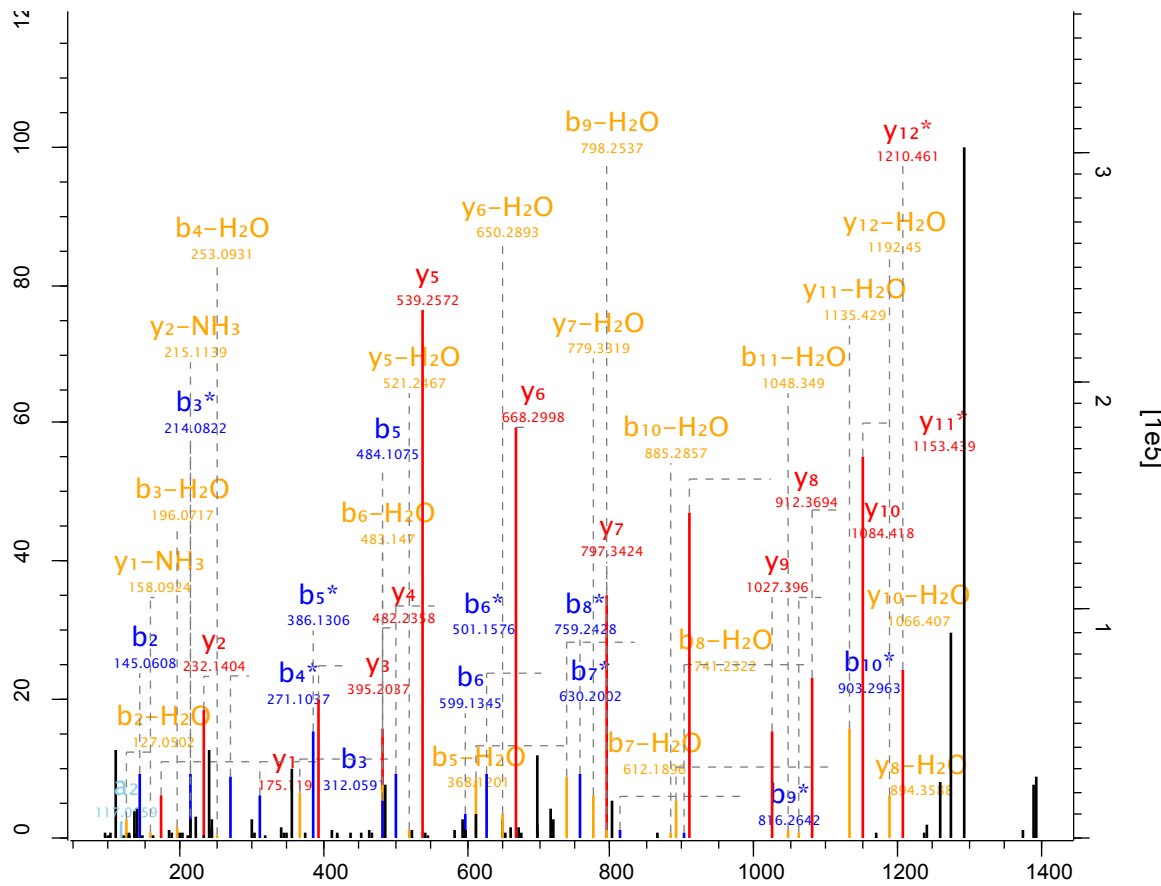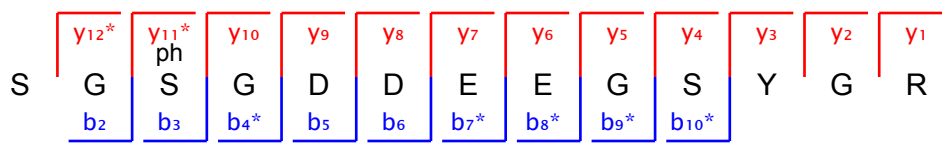

| Raw file      | Scan | Method    | Score | m/z    |
|---------------|------|-----------|-------|--------|
| Recip_2_34_38 | 5137 | FTMS; HCD | 54.09 | 564.23 |

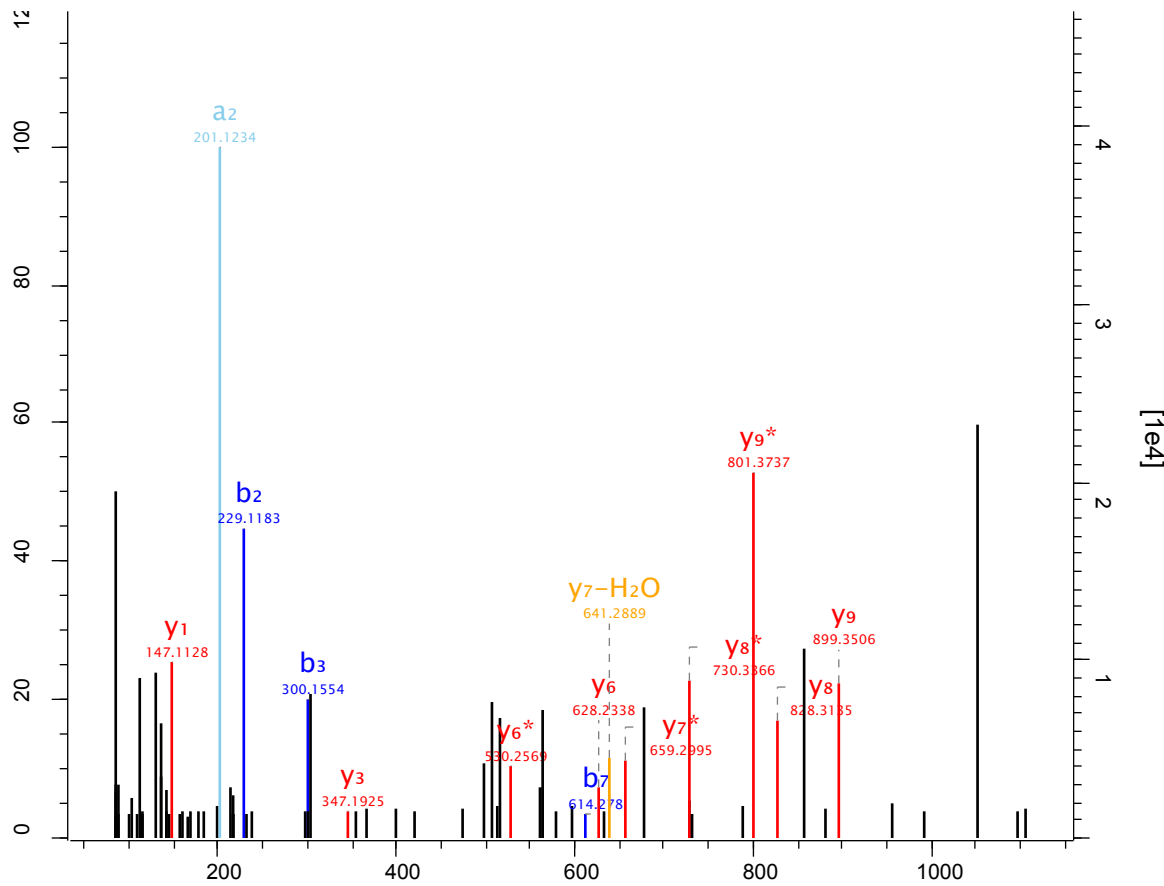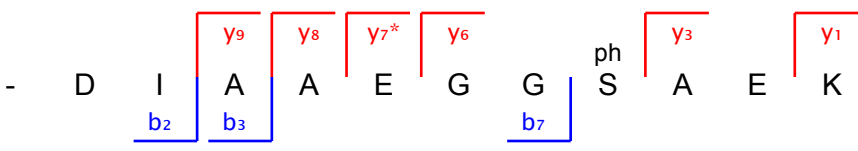

| Raw file      | Scan | Method    | Score | m/z    |
|---------------|------|-----------|-------|--------|
| Recip_2_34_38 | 5306 | FTMS; HCD | 52.45 | 640.26 |

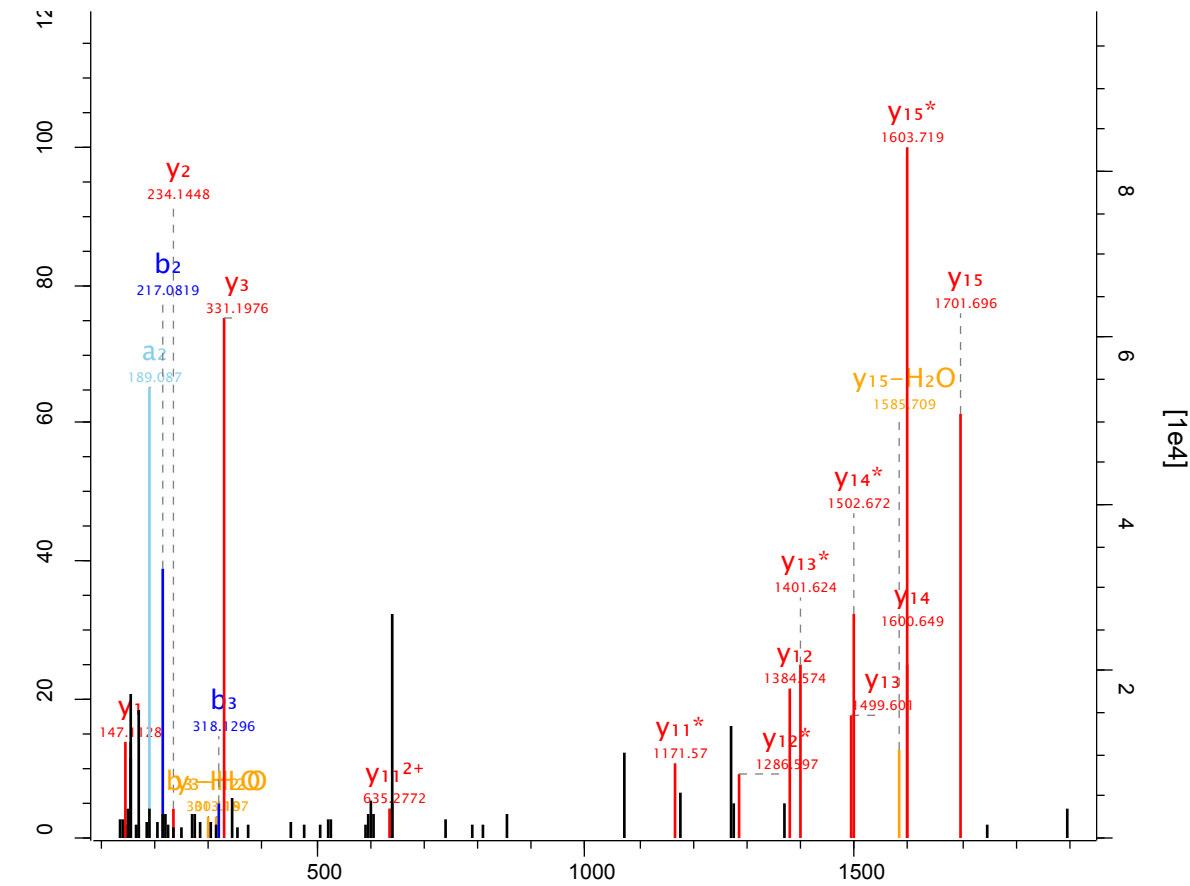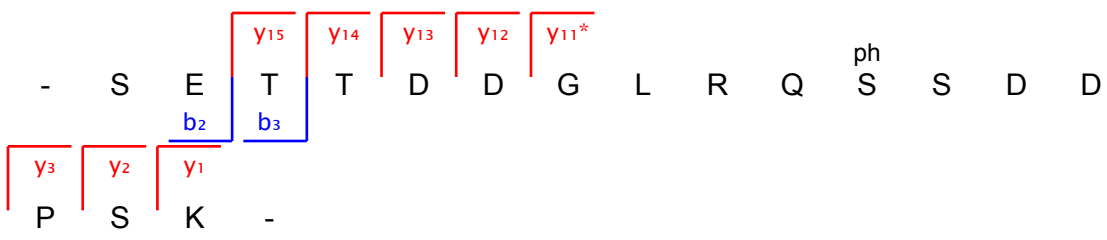

Raw file Scan Method Score m/z  
 Recip\_2\_34\_38 5346 FTMS; HCD 142.89 528.72

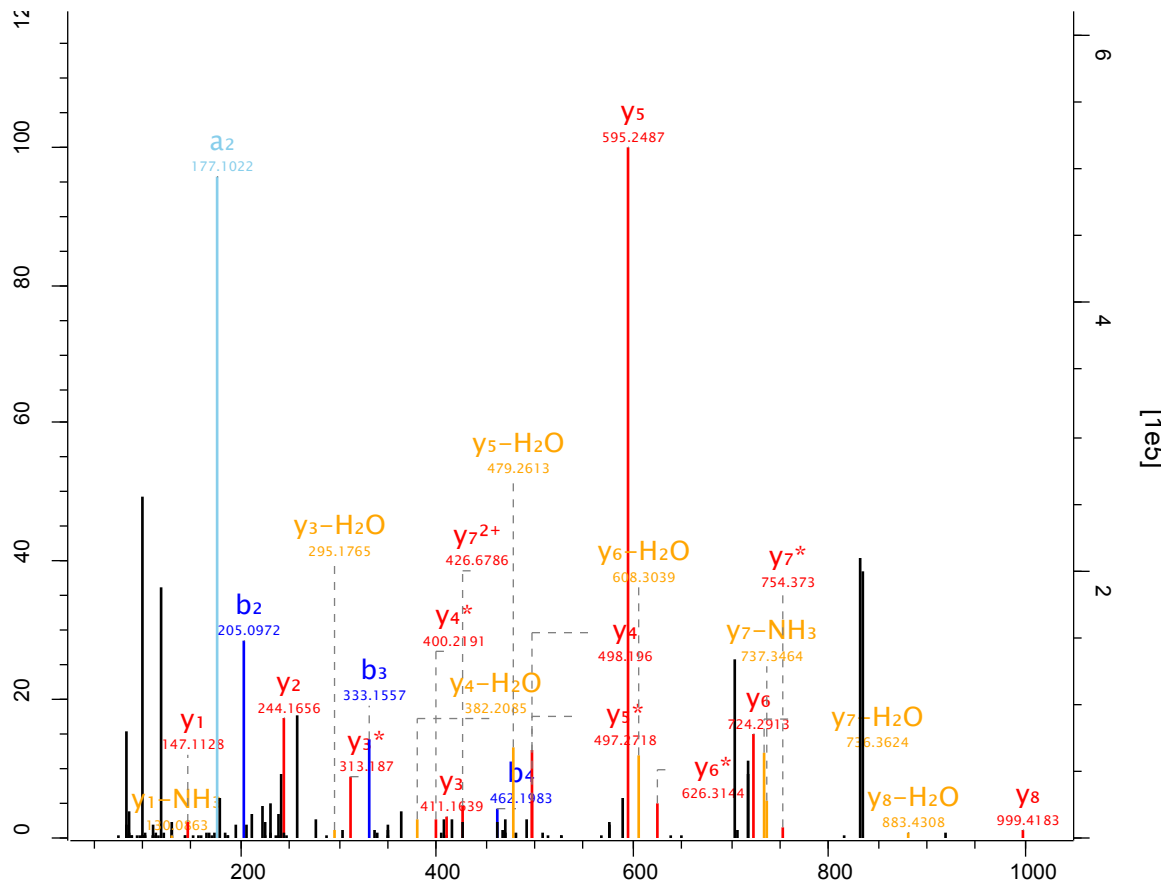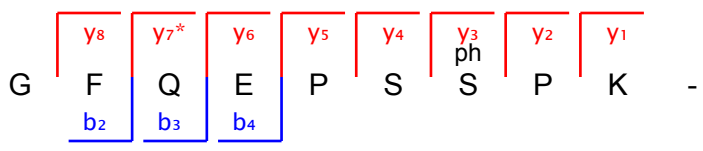

| Raw file      | Scan | Method    | Score  | m/z    |
|---------------|------|-----------|--------|--------|
| Recip_2_34_38 | 5376 | FTMS; HCD | 106.58 | 636.26 |

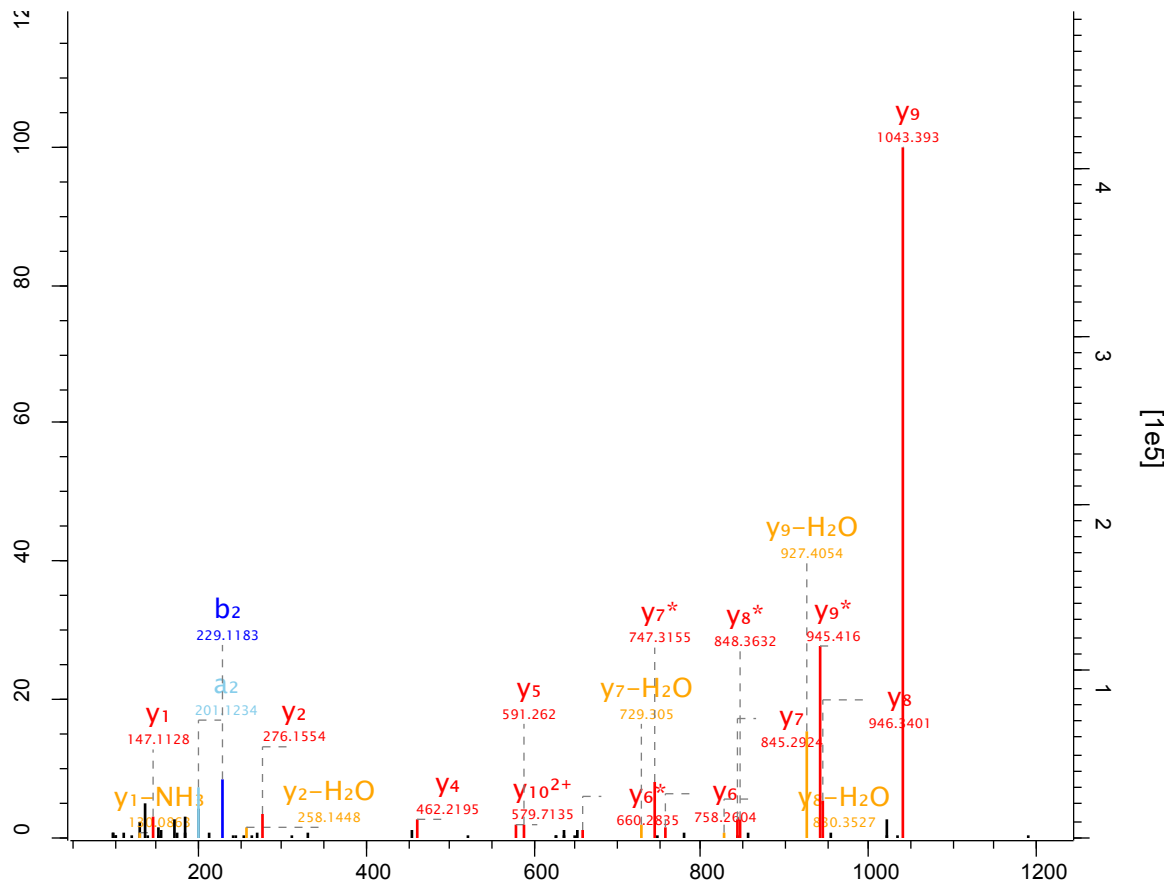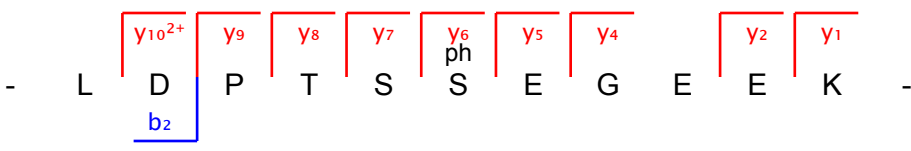



| Raw file      | Scan | Method    | Score | m/z    |
|---------------|------|-----------|-------|--------|
| Recip_2_34_38 | 5389 | FTMS; HCD | 68.36 | 487.24 |

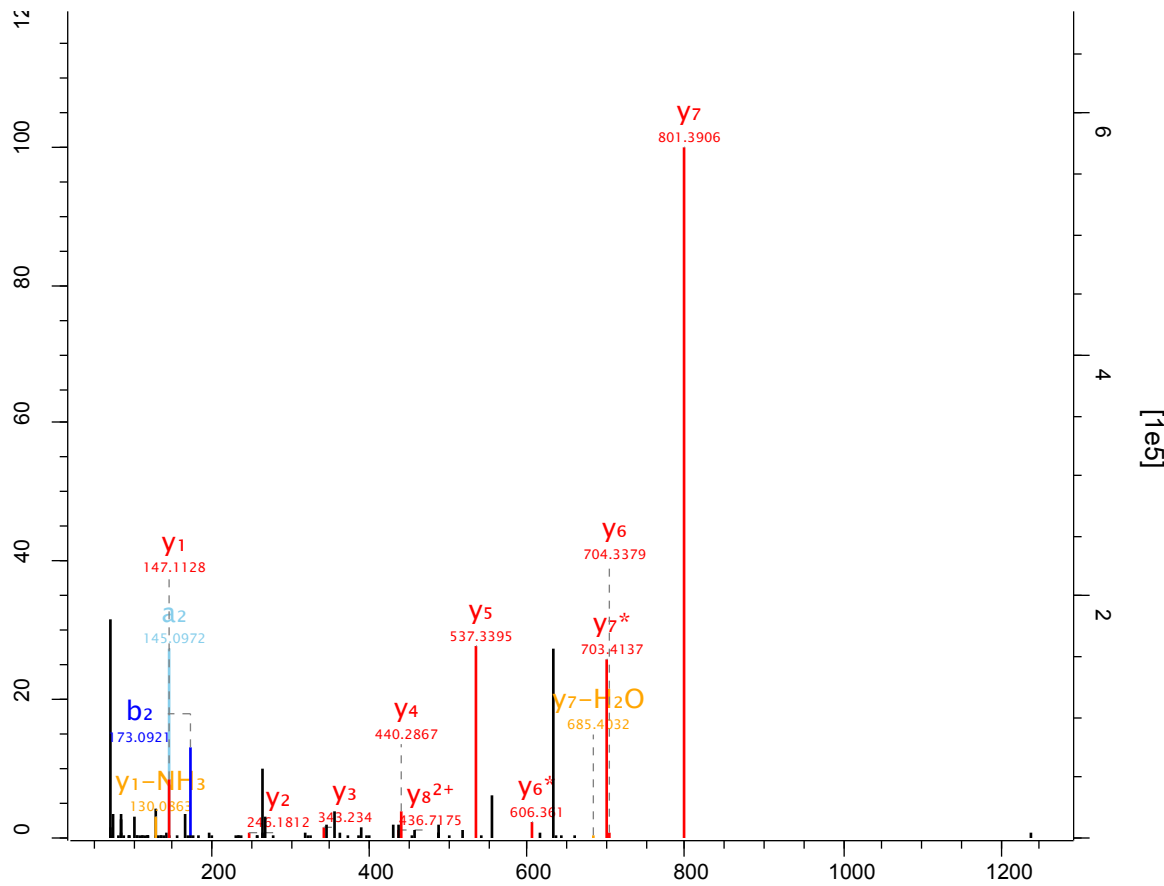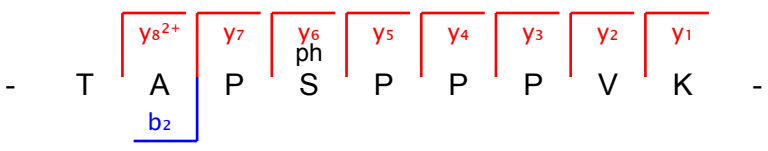

Raw file Scan Method Score m/z  
 Recip\_2\_34\_38 5433 FTMS; HCD 145.86 657.8

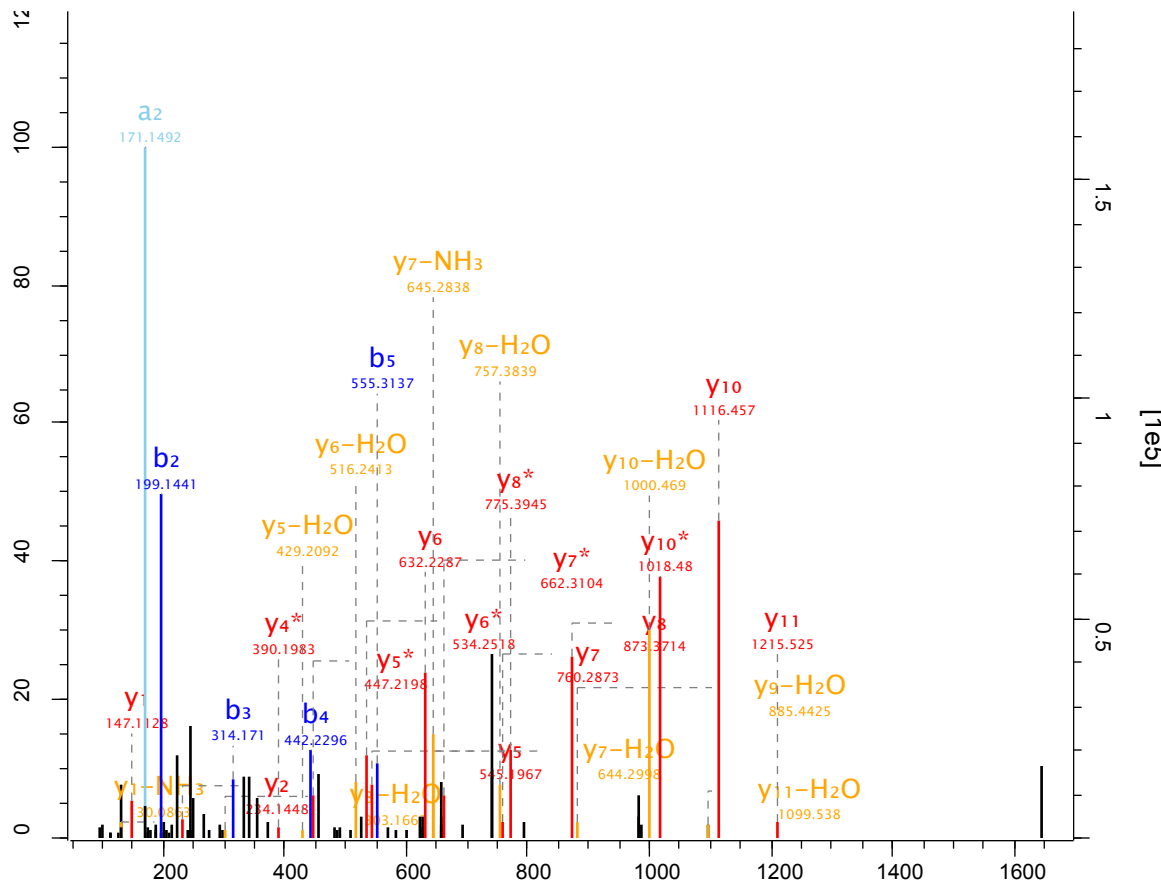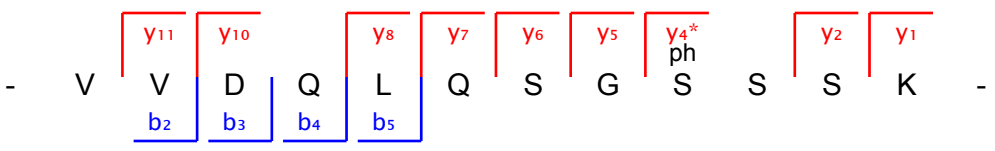

Raw file Scan Method Score m/z  
 Recip\_2\_34\_38 5584 FTMS; HCD 49.59 707.32

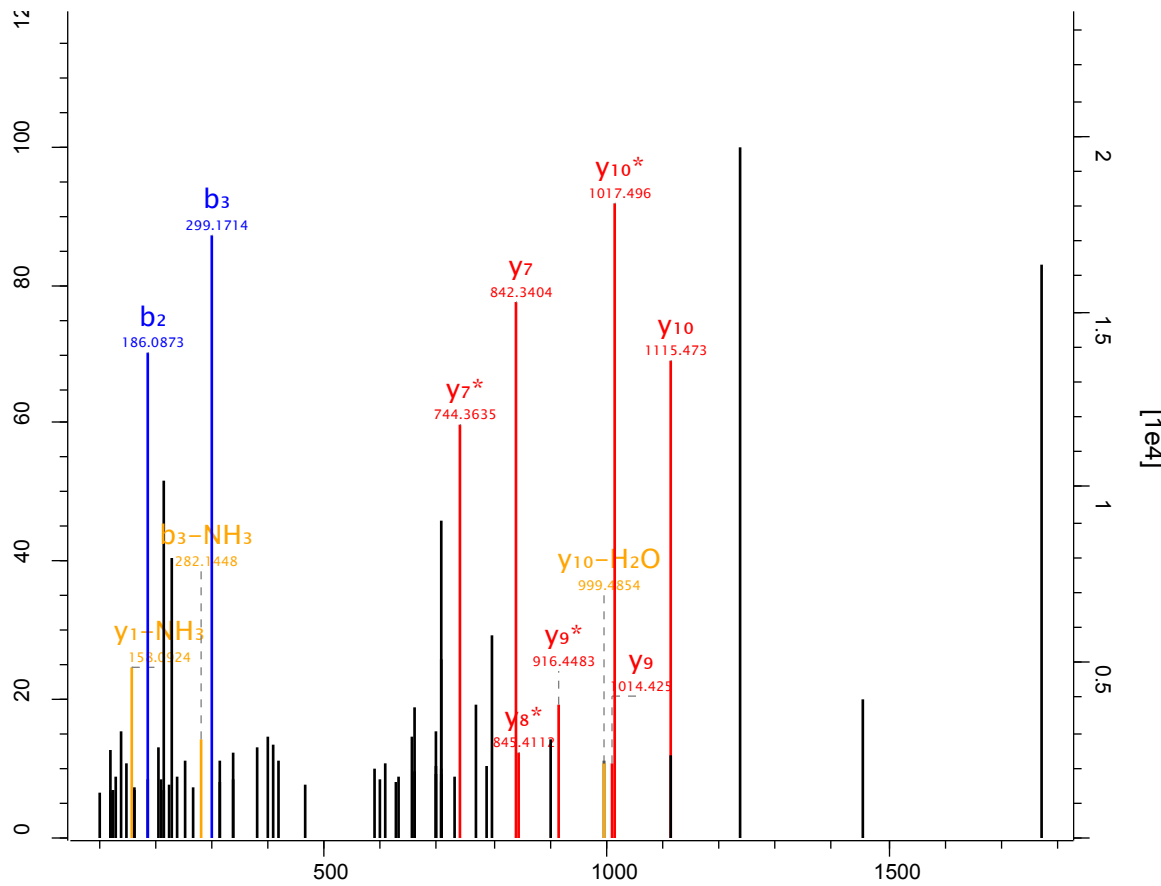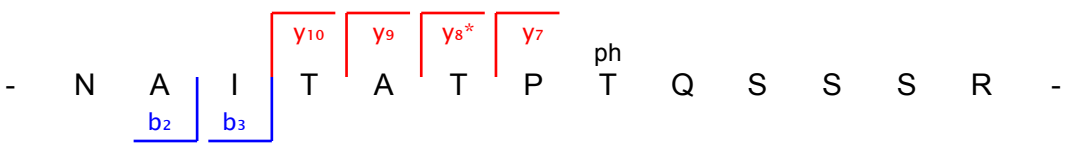

| Raw file      | Scan | Method    | Score | m/z    |
|---------------|------|-----------|-------|--------|
| Recip_2_34_38 | 5629 | FTMS; HCD | 73.83 | 640.78 |

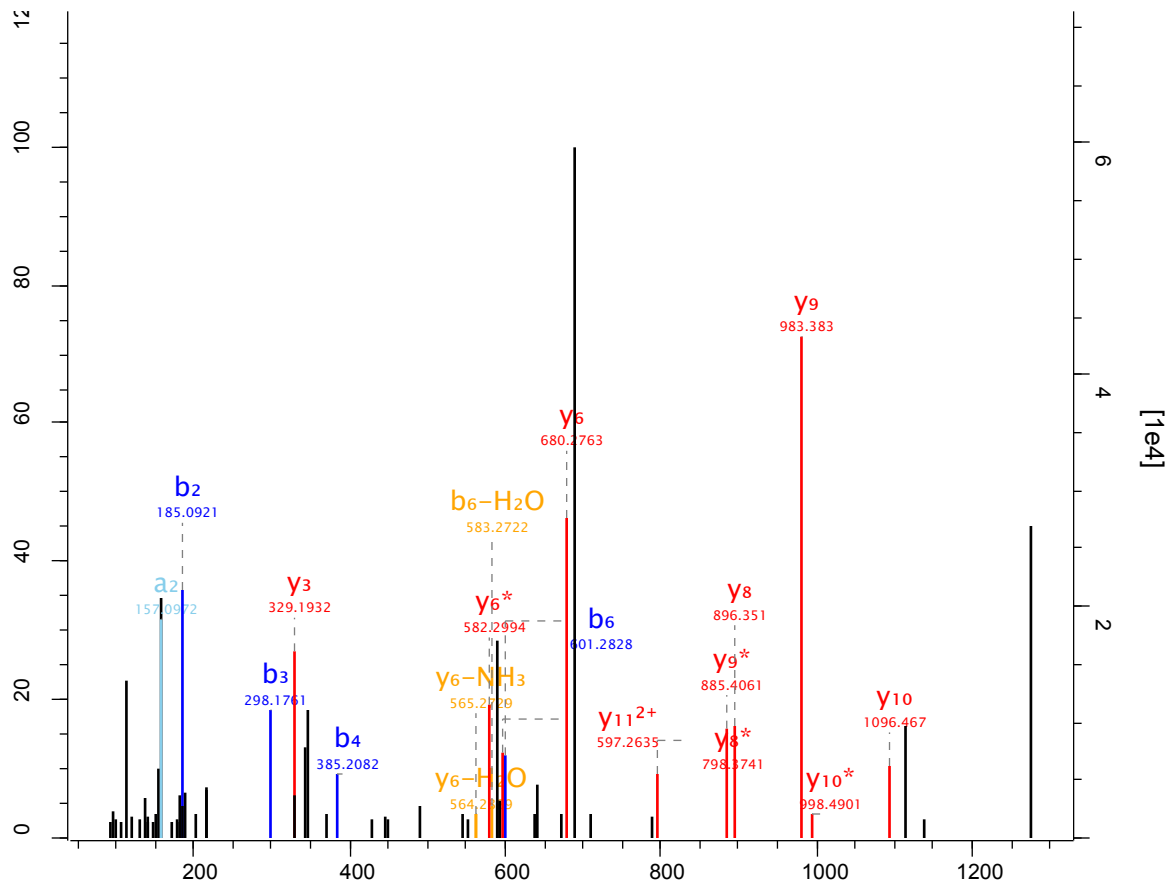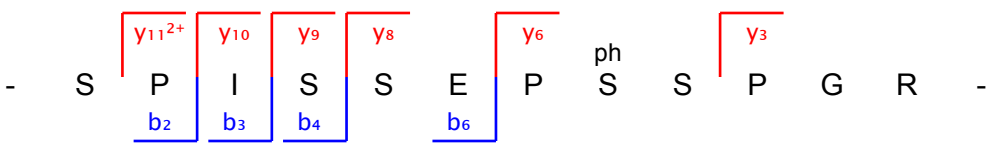

| Raw file      | Scan | Method    | Score | m/z    |
|---------------|------|-----------|-------|--------|
| Recip_2_34_38 | 5711 | FTMS; HCD | 49.19 | 973.37 |

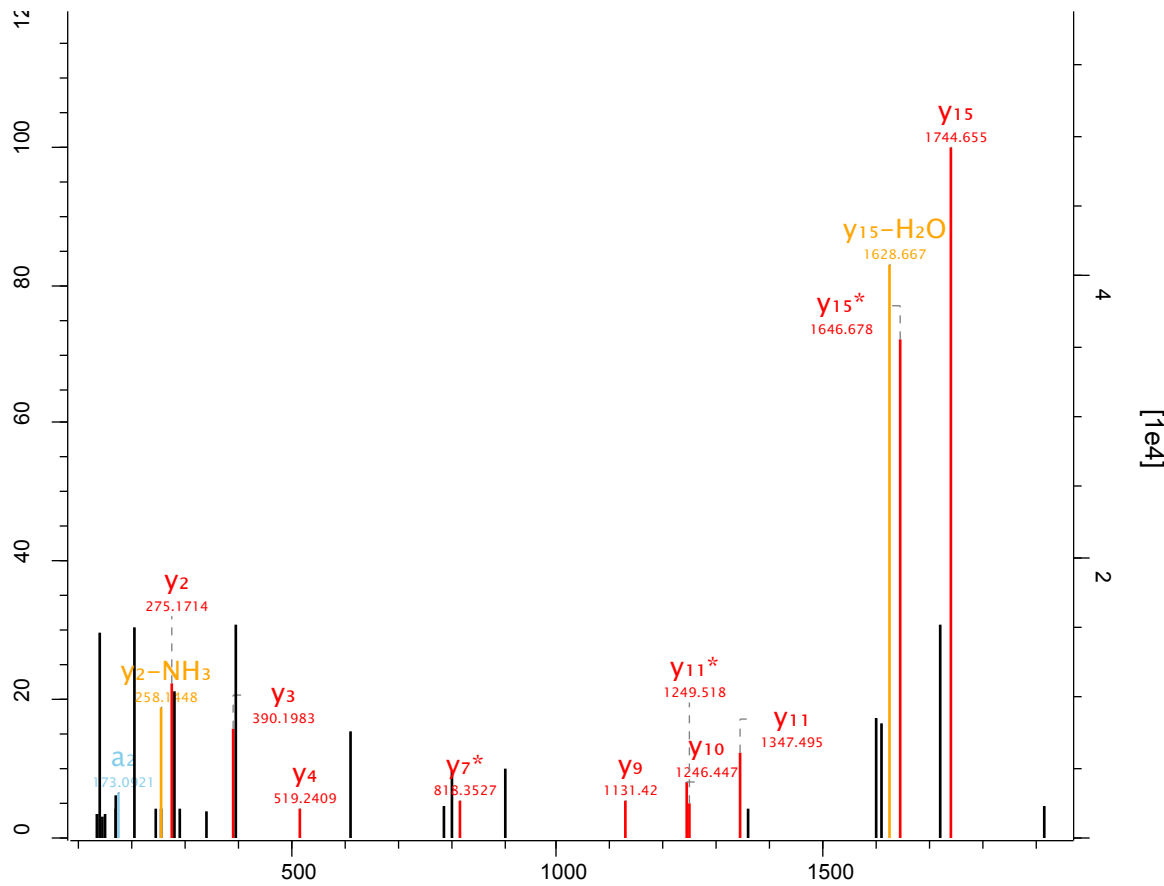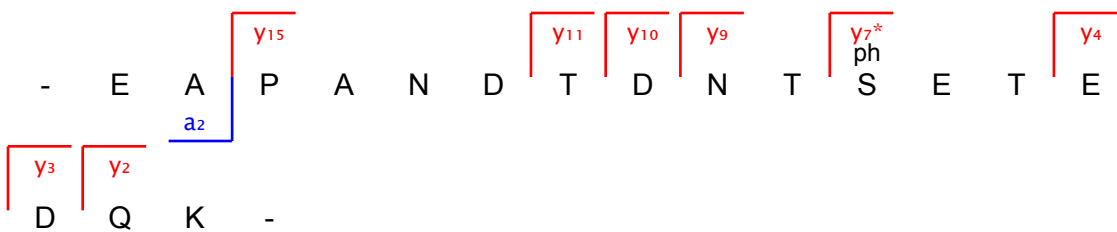

Raw file Scan Method Score m/z  
 Recip\_2\_34\_38 5841 FTMS; HCD 129.77 588.94

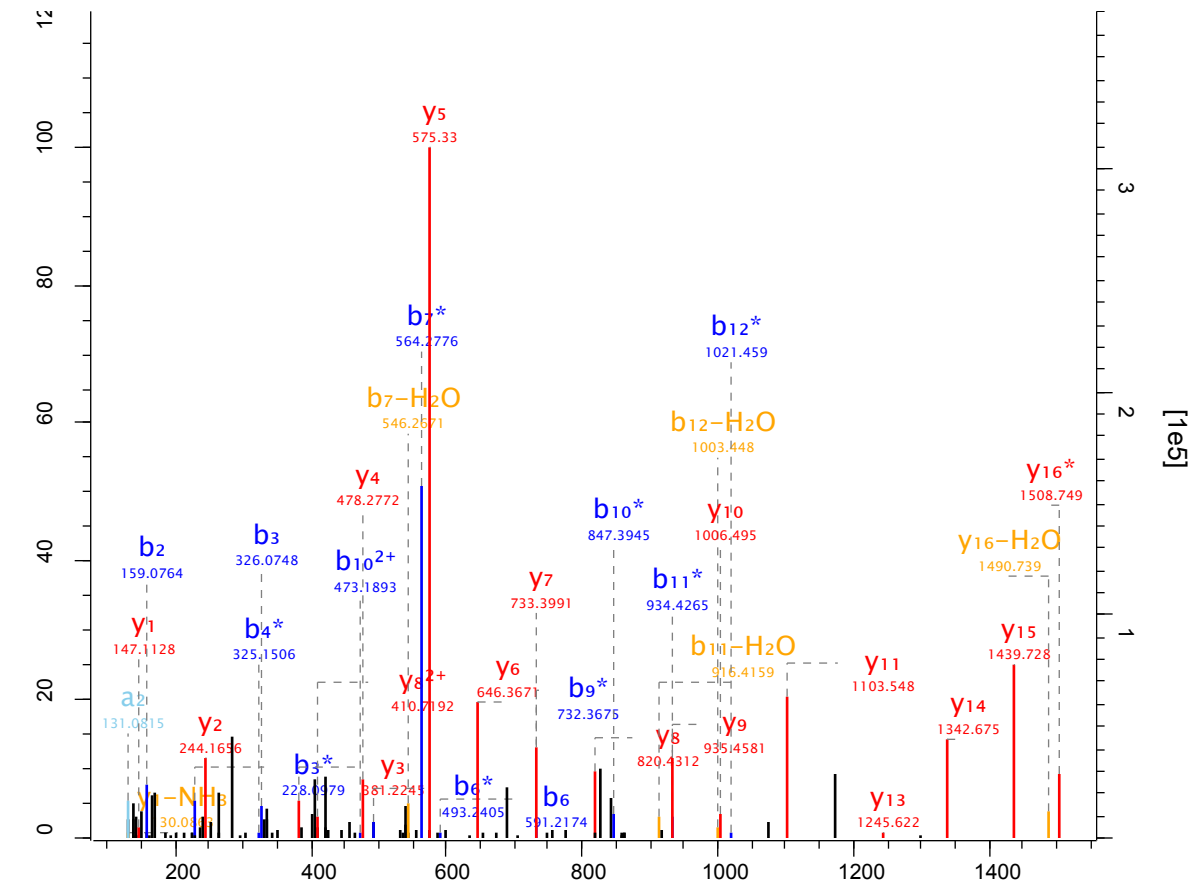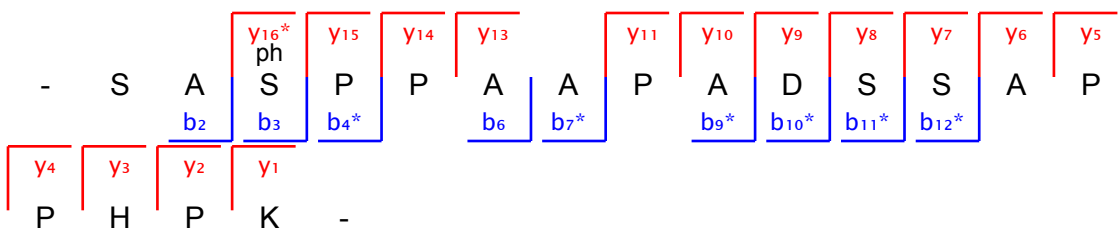

Raw file Scan Method Score m/z  
 Recip\_2\_34\_38 5872 FTMS; HCD 71.08 524.57

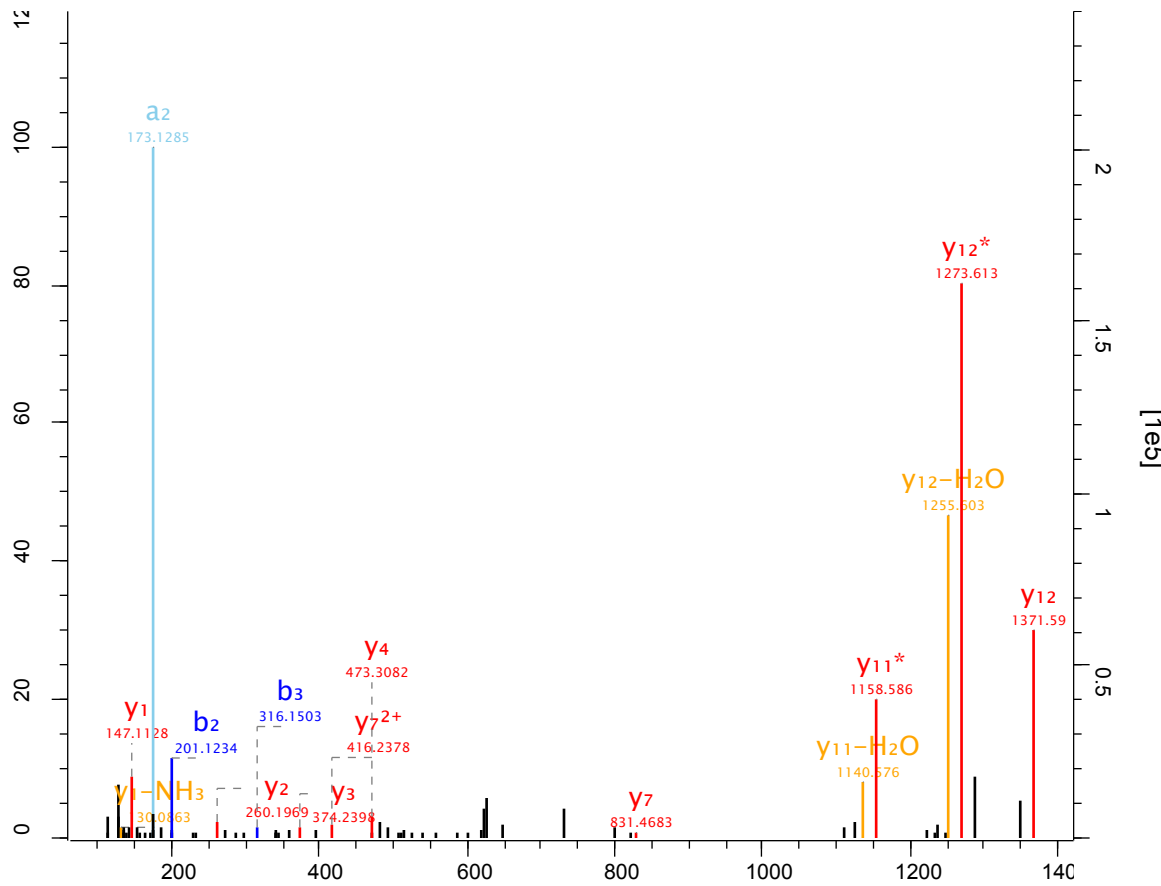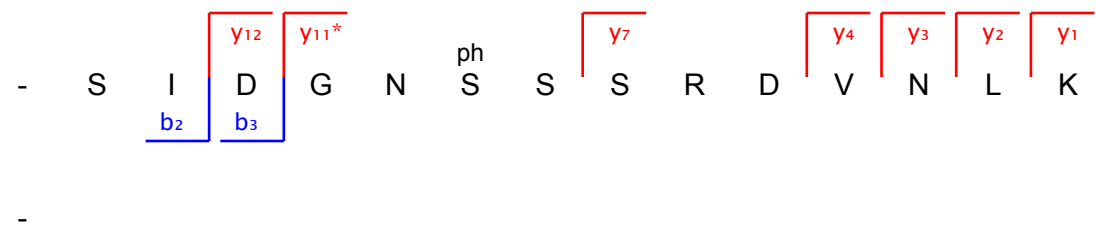

Raw file Scan Method Score m/z  
 Recip\_2\_34\_38 5946 FTMS; HCD 148.57 593.24

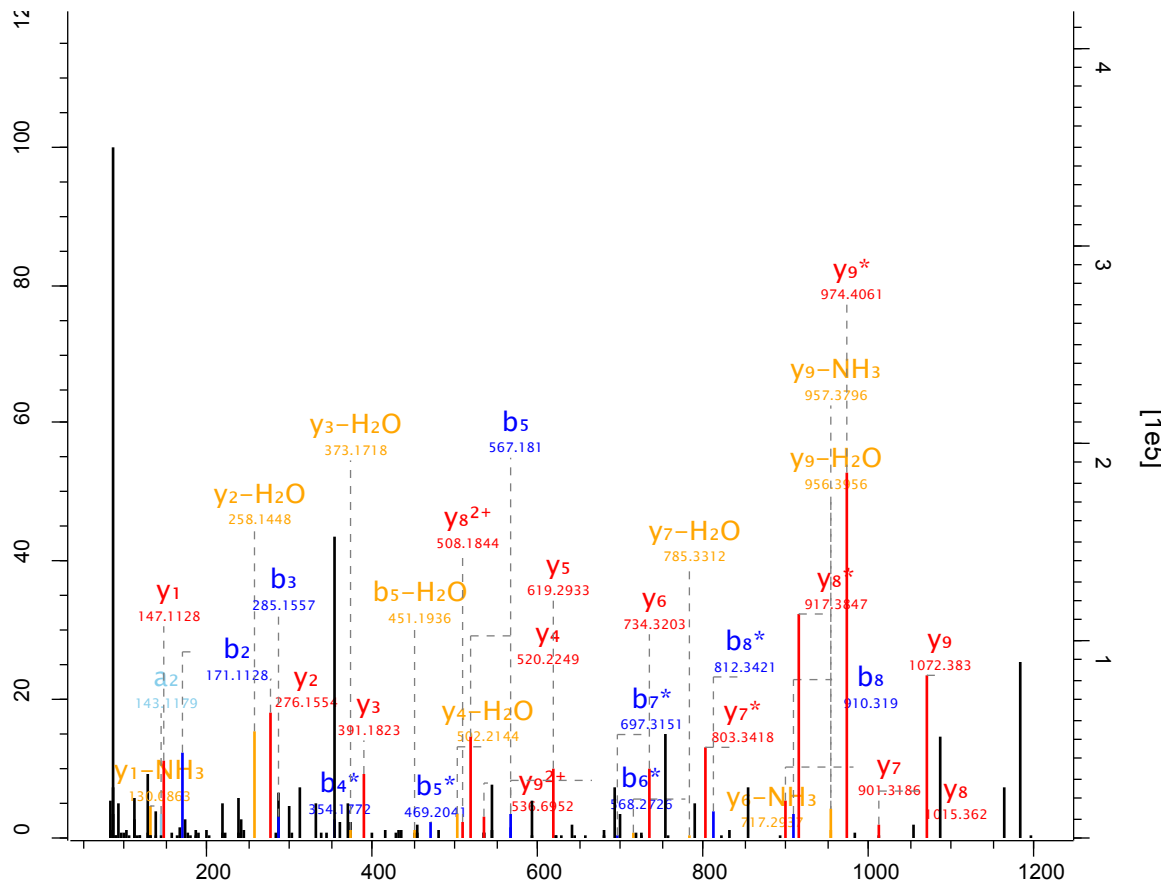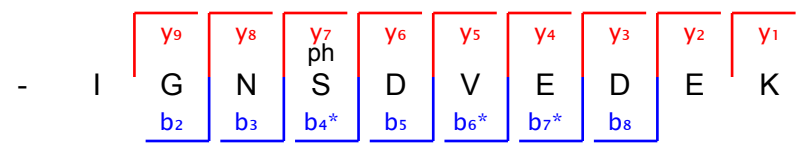



Raw file Scan Method Score m/z  
 Recip\_2\_34\_38 5954 FTMS; HCD 122.39 499.23

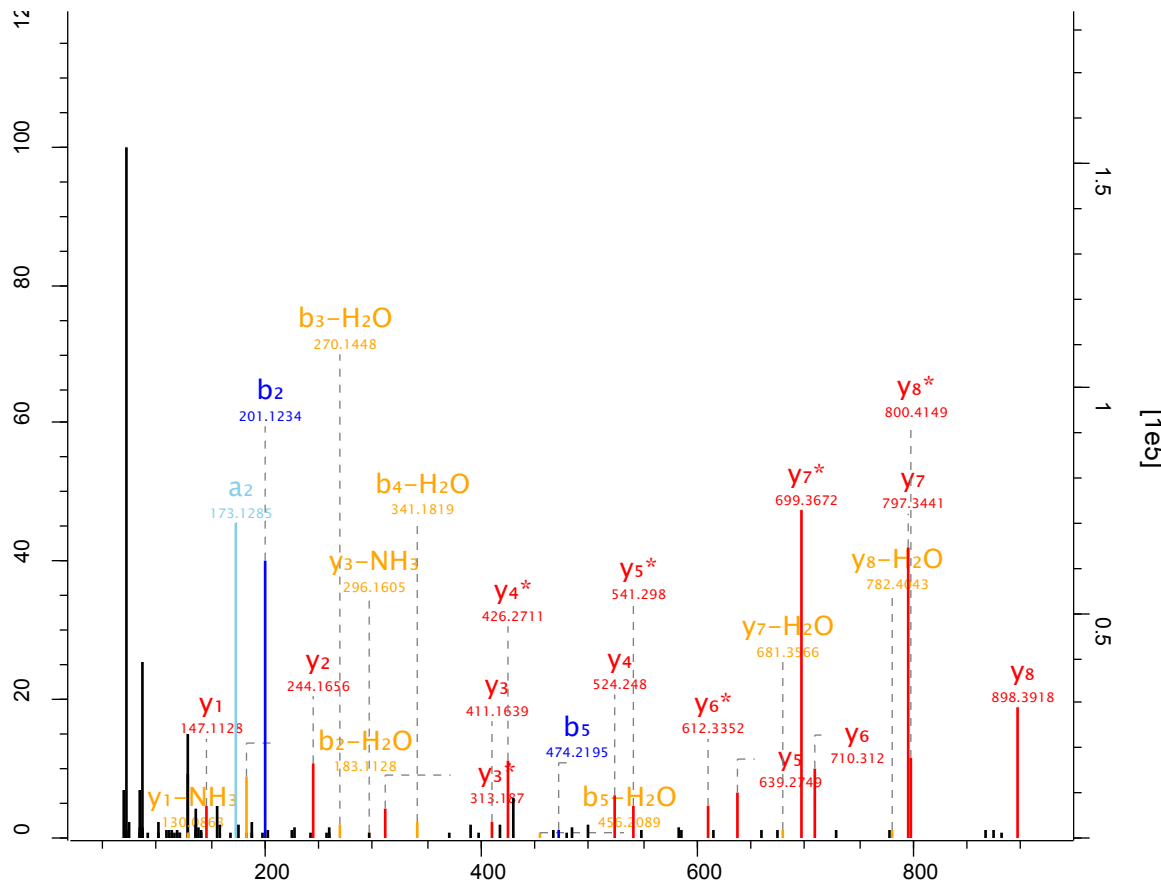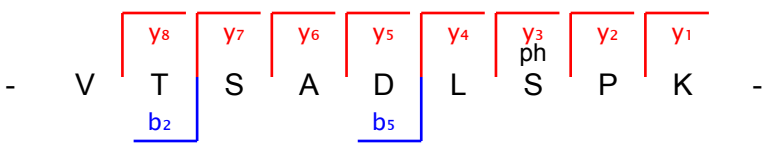

Raw file Scan Method Score m/z  
 Recip\_2\_34\_38 6232 FTMS; HCD 130.19 594.26

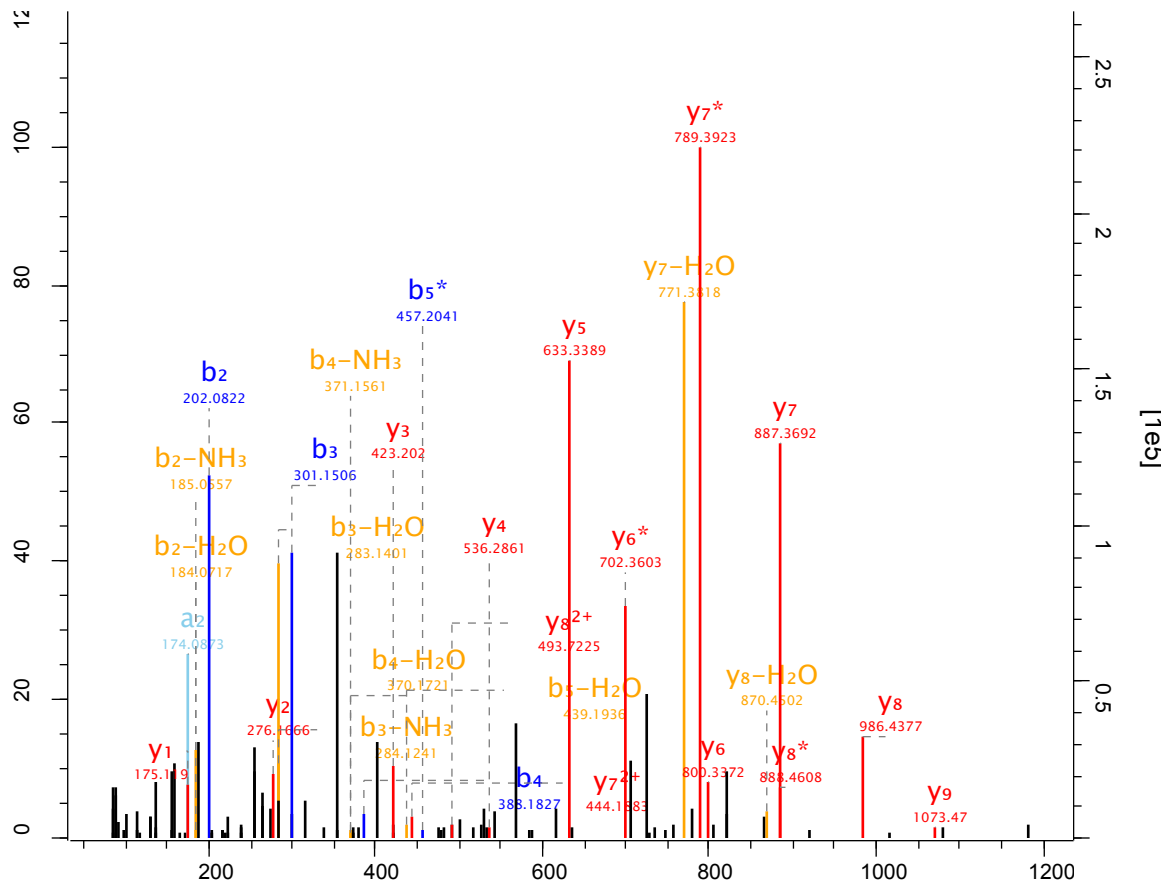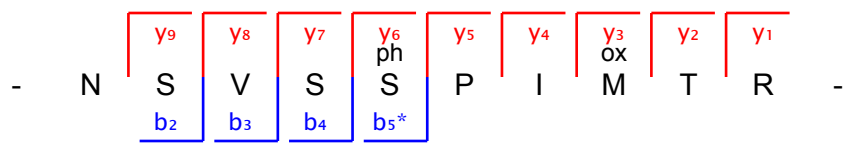



| Raw file      | Scan | Method    | Score | m/z    |
|---------------|------|-----------|-------|--------|
| Recip_2_34_38 | 6302 | FTMS; HCD | 66.99 | 545.73 |

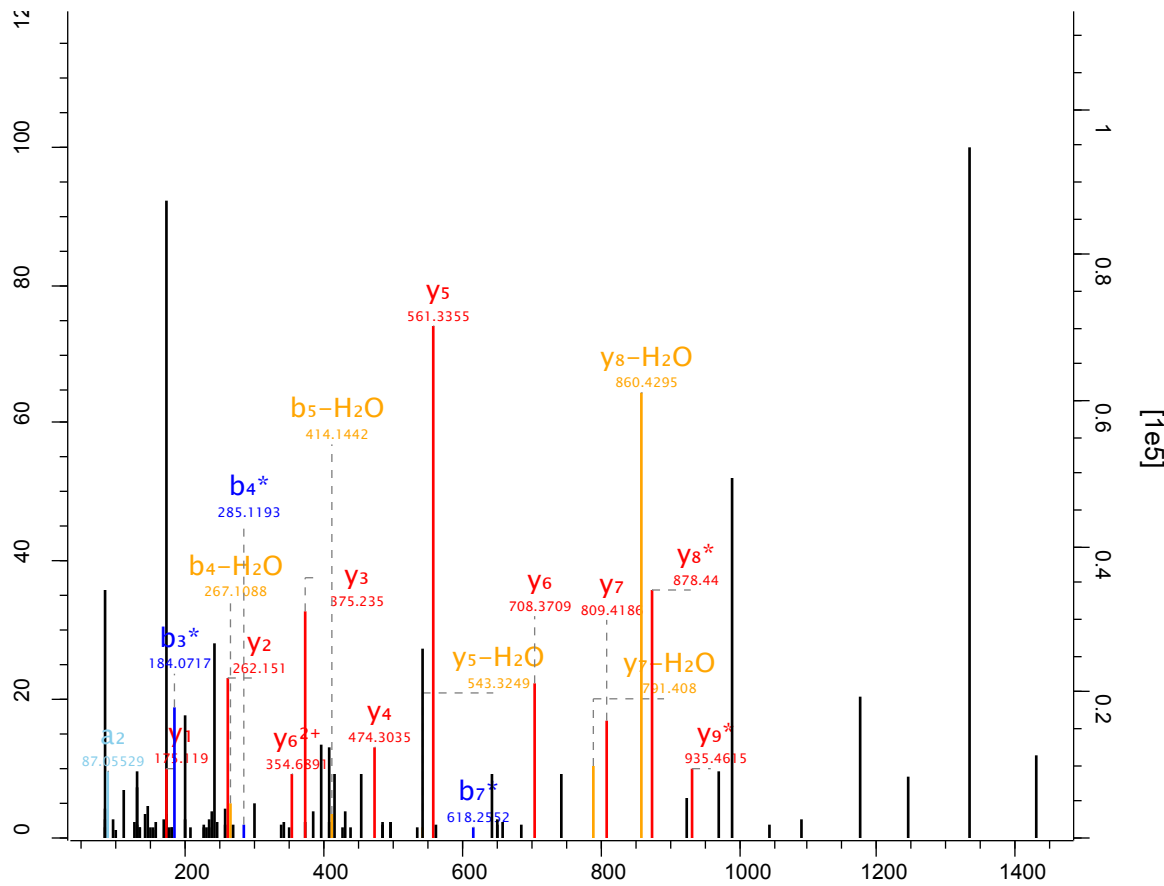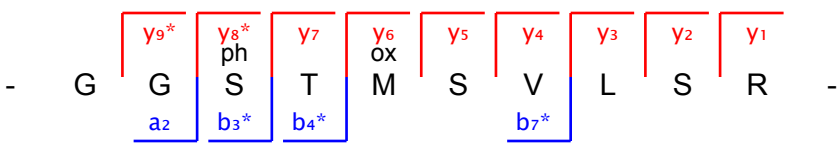

Raw file Scan Method Score m/z  
 Recip\_2\_34\_38 6316 FTMS; HCD 54.26 502.2

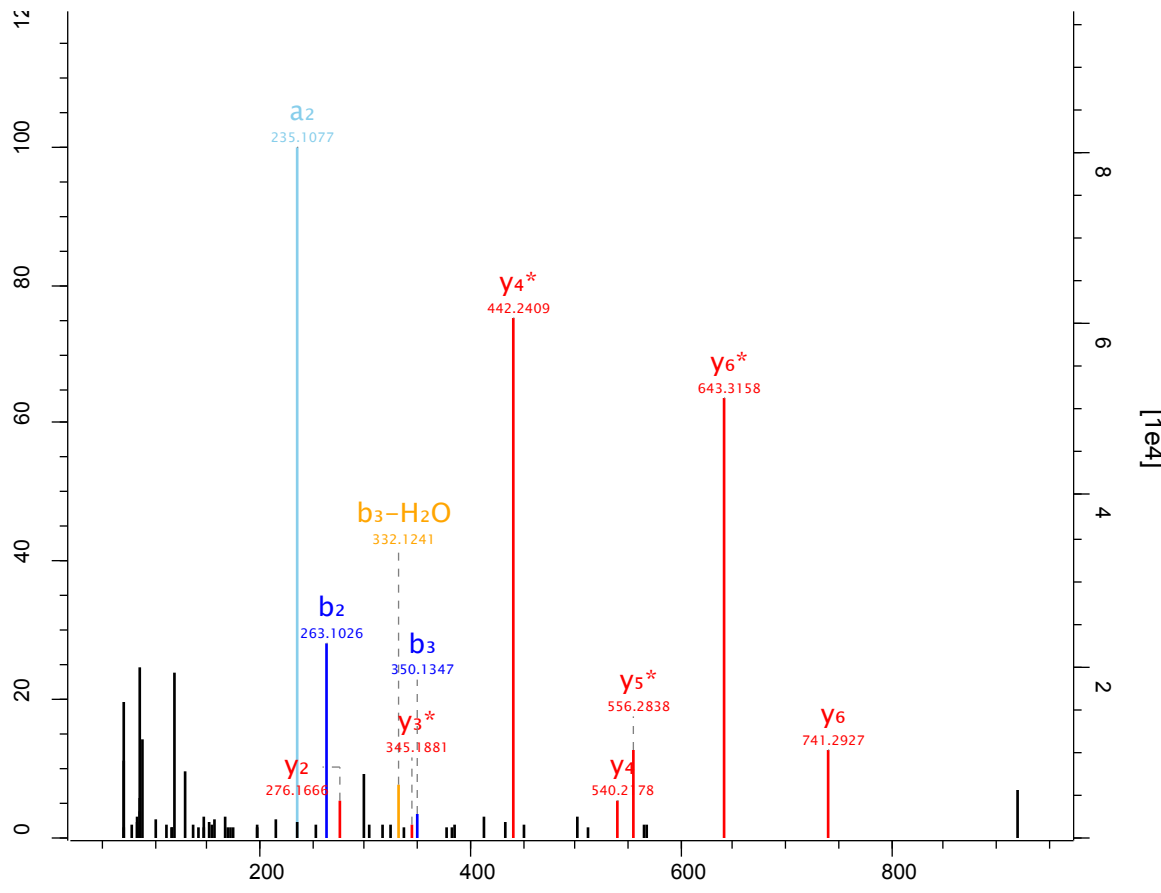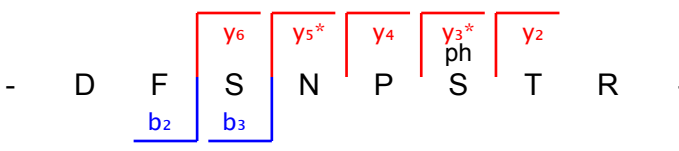

Raw file Scan Method Score m/z  
 Recip\_2\_34\_38 6392 FTMS; HCD 173.19 833.87

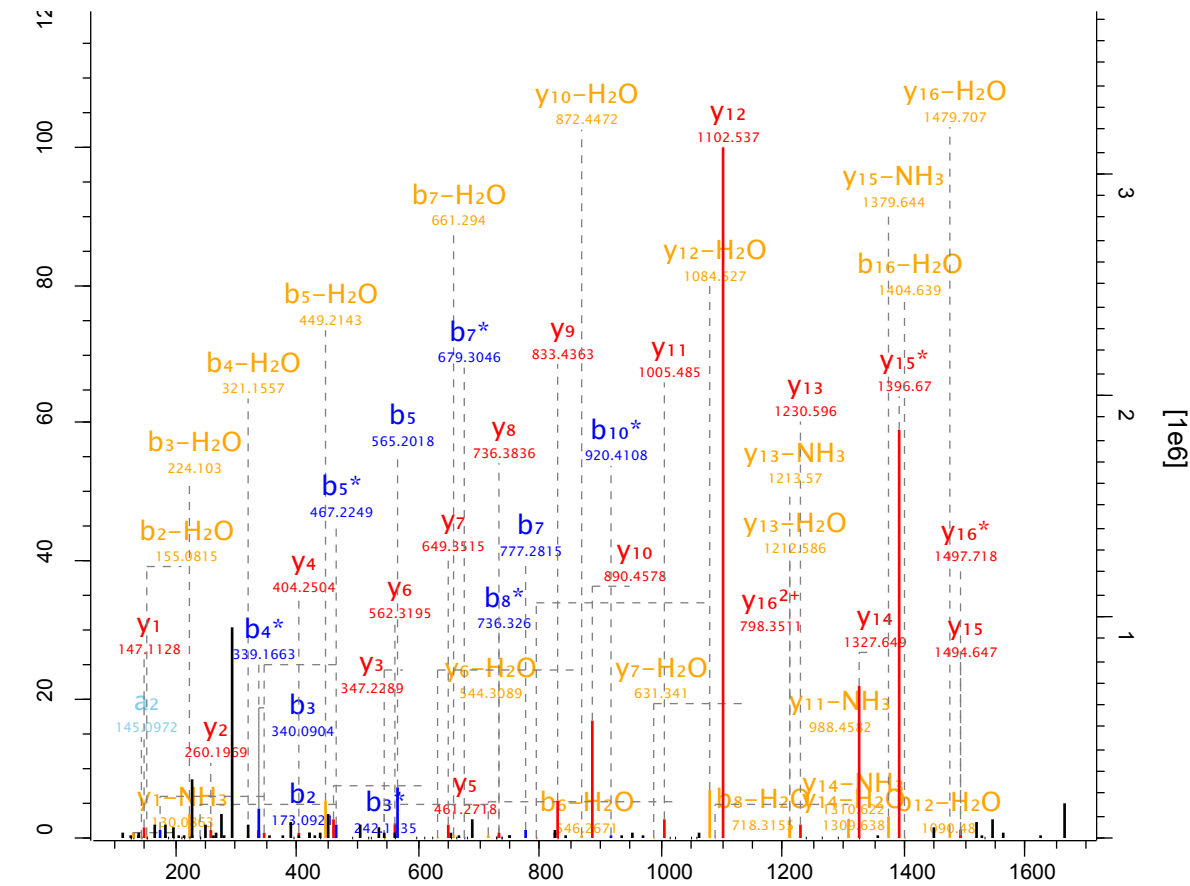

| Raw file      | Scan | Method    | Score | m/z    |
|---------------|------|-----------|-------|--------|
| Recip_2_34_38 | 6514 | FTMS; HCD | 65.22 | 422.21 |

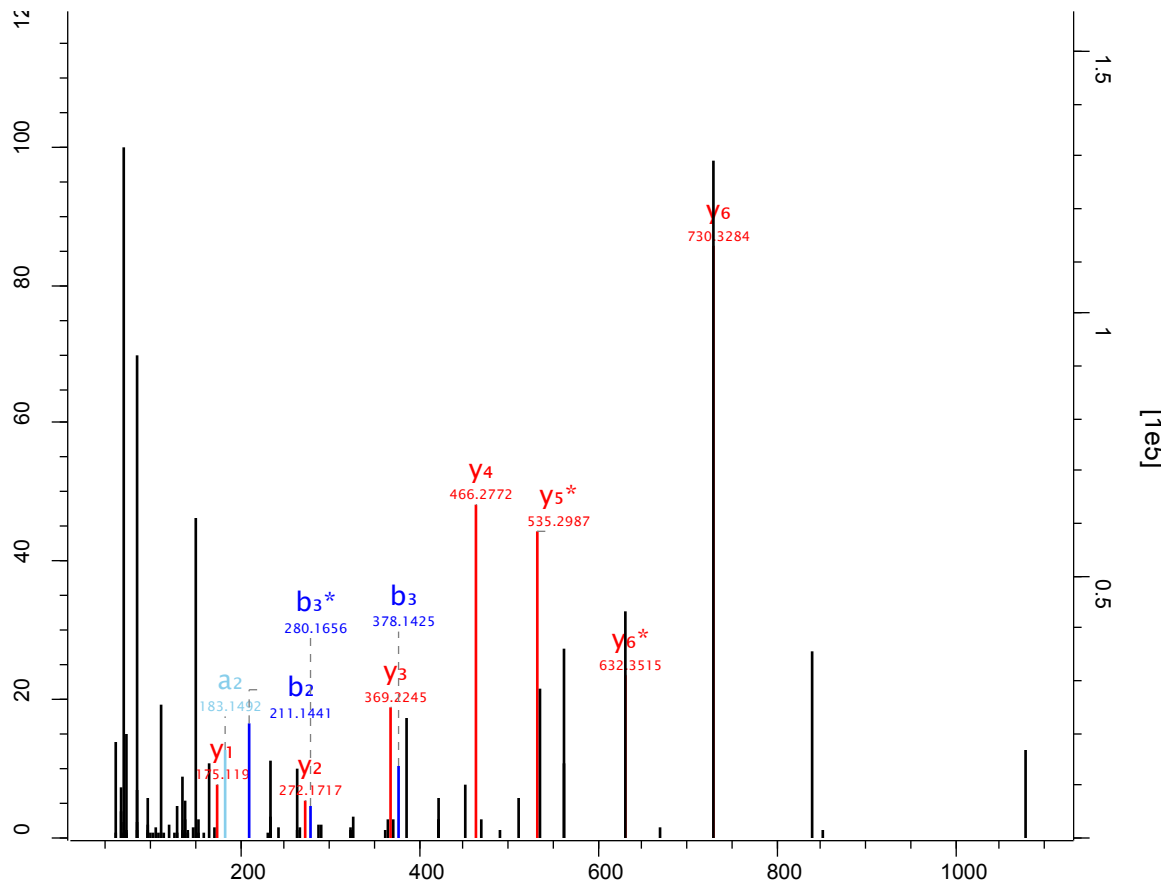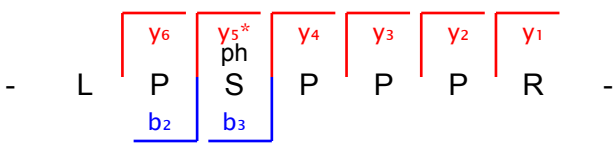

| Raw file      | Scan | Method    | Score | m/z    |
|---------------|------|-----------|-------|--------|
| Recip_2_34_38 | 6578 | FTMS; HCD | 92.27 | 643.78 |

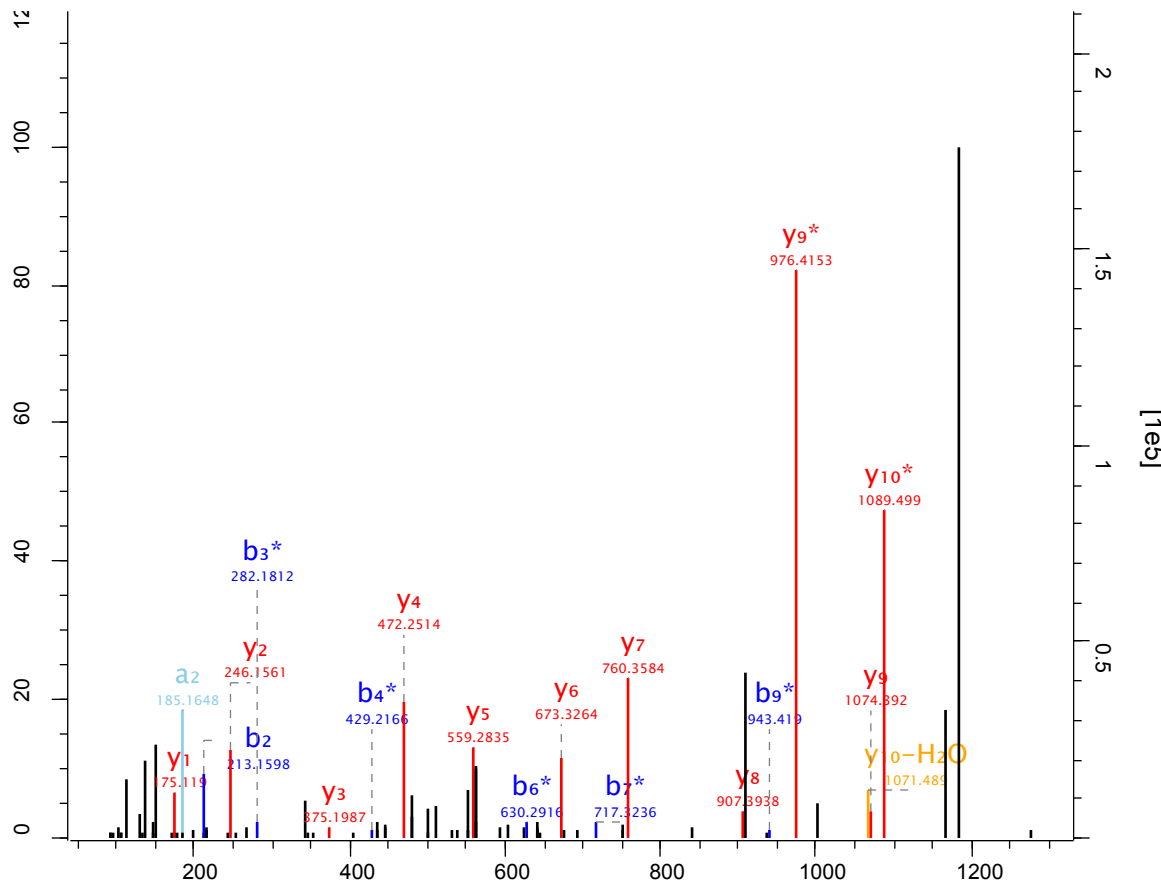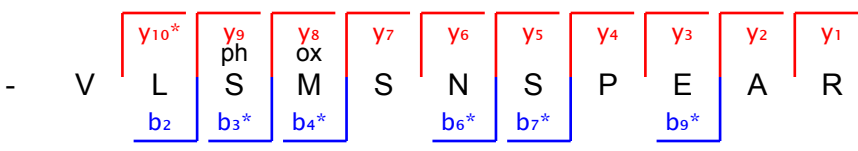



| Raw file      | Scan | Method    | Score | m/z    |
|---------------|------|-----------|-------|--------|
| Recip_2_34_38 | 6582 | FTMS; HCD | 72.89 | 584.25 |

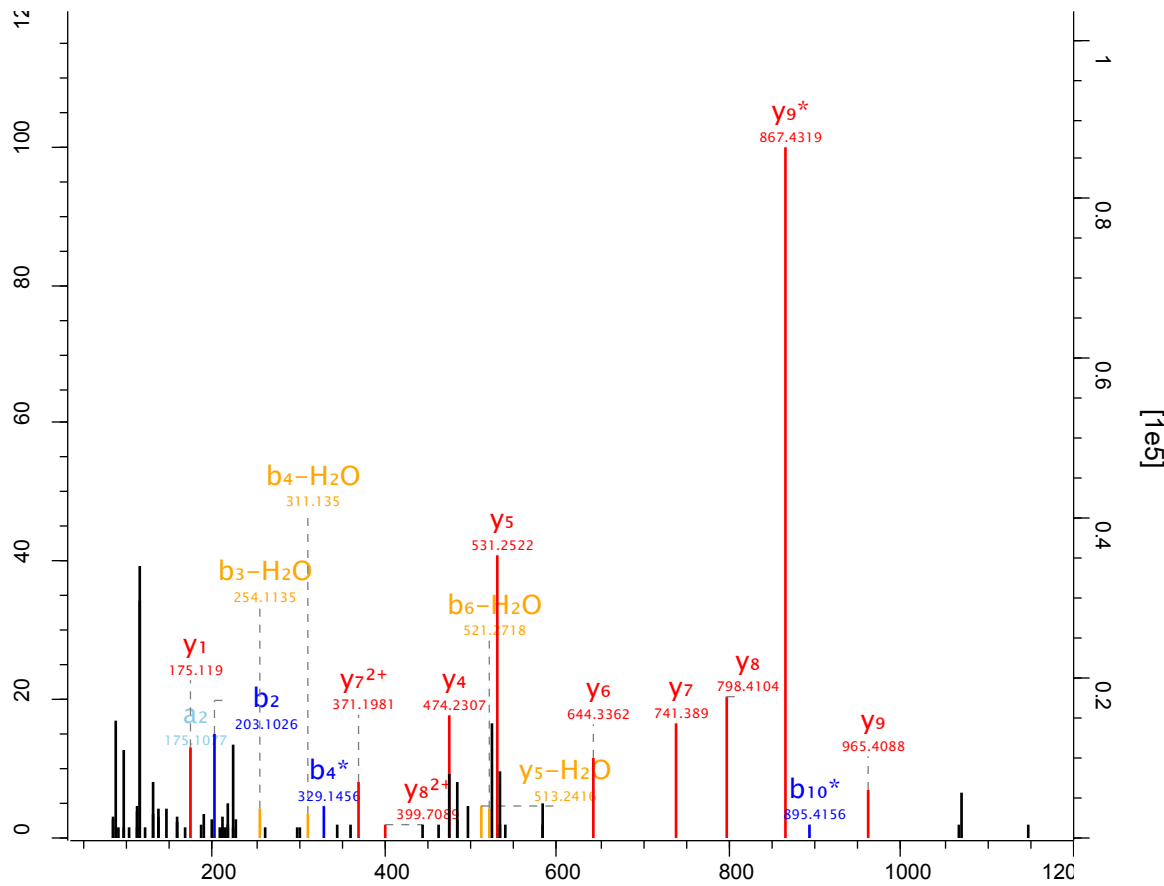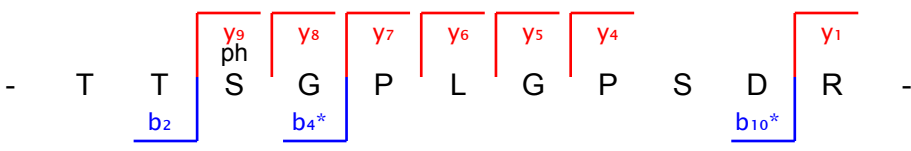

| Raw file      | Scan | Method    | Score | m/z    |
|---------------|------|-----------|-------|--------|
| Recip_2_34_38 | 6629 | FTMS; HCD | 40.5  | 483.21 |

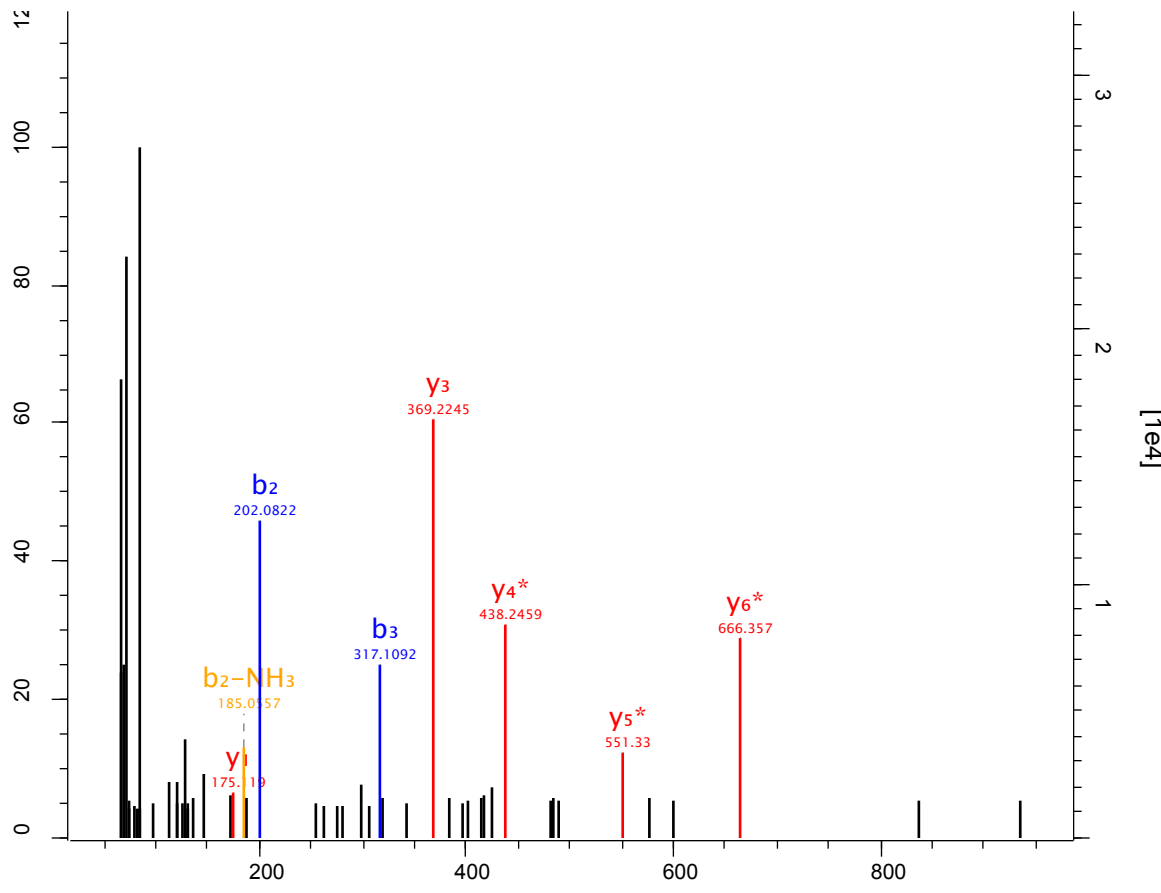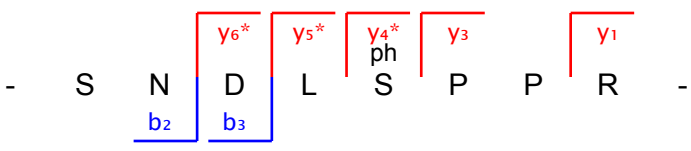

Raw file Scan Method Score m/z  
 Recip\_2\_34\_38 6652 FTMS; HCD 57.81 676.63

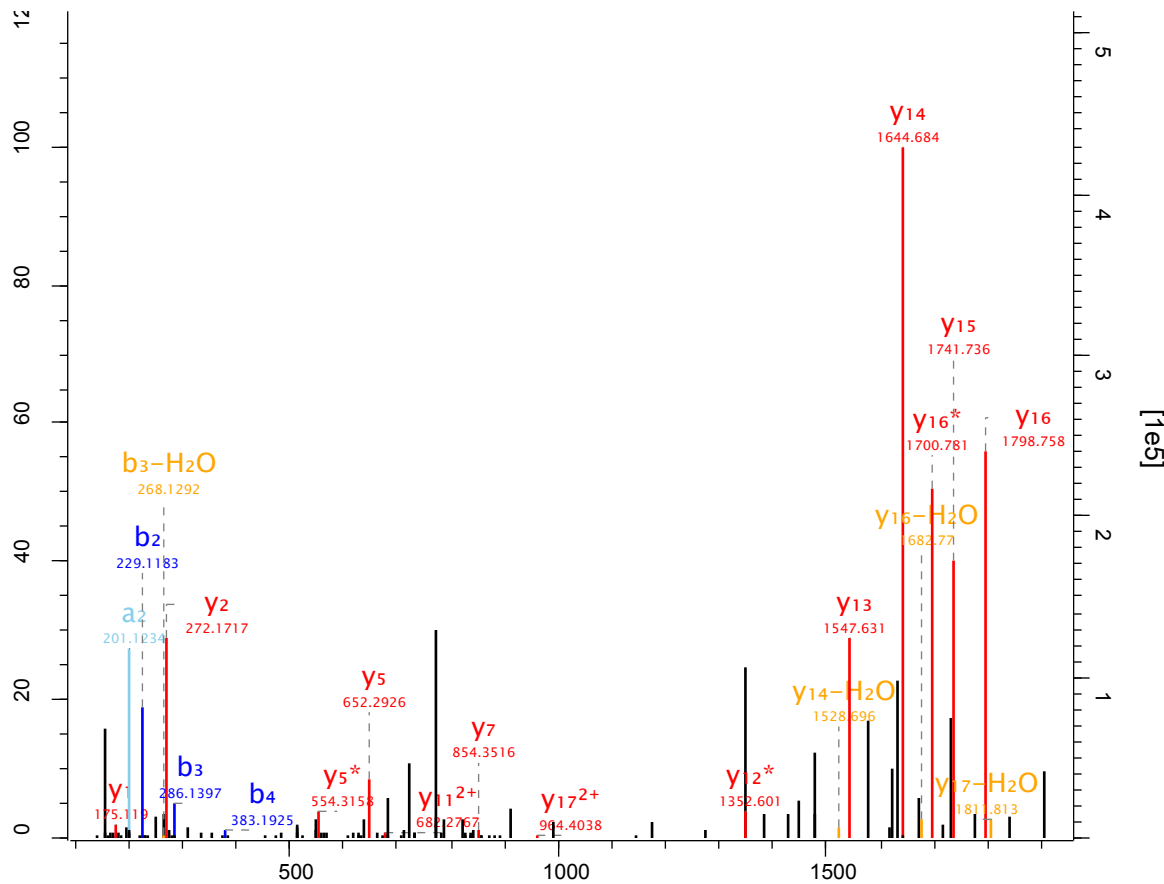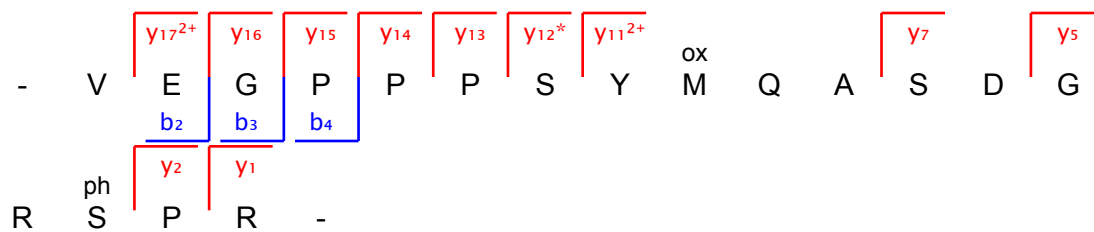

Raw file Scan Method Score m/z  
 Recip\_2\_34\_38 6669 FTMS; HCD 199.81 842.8

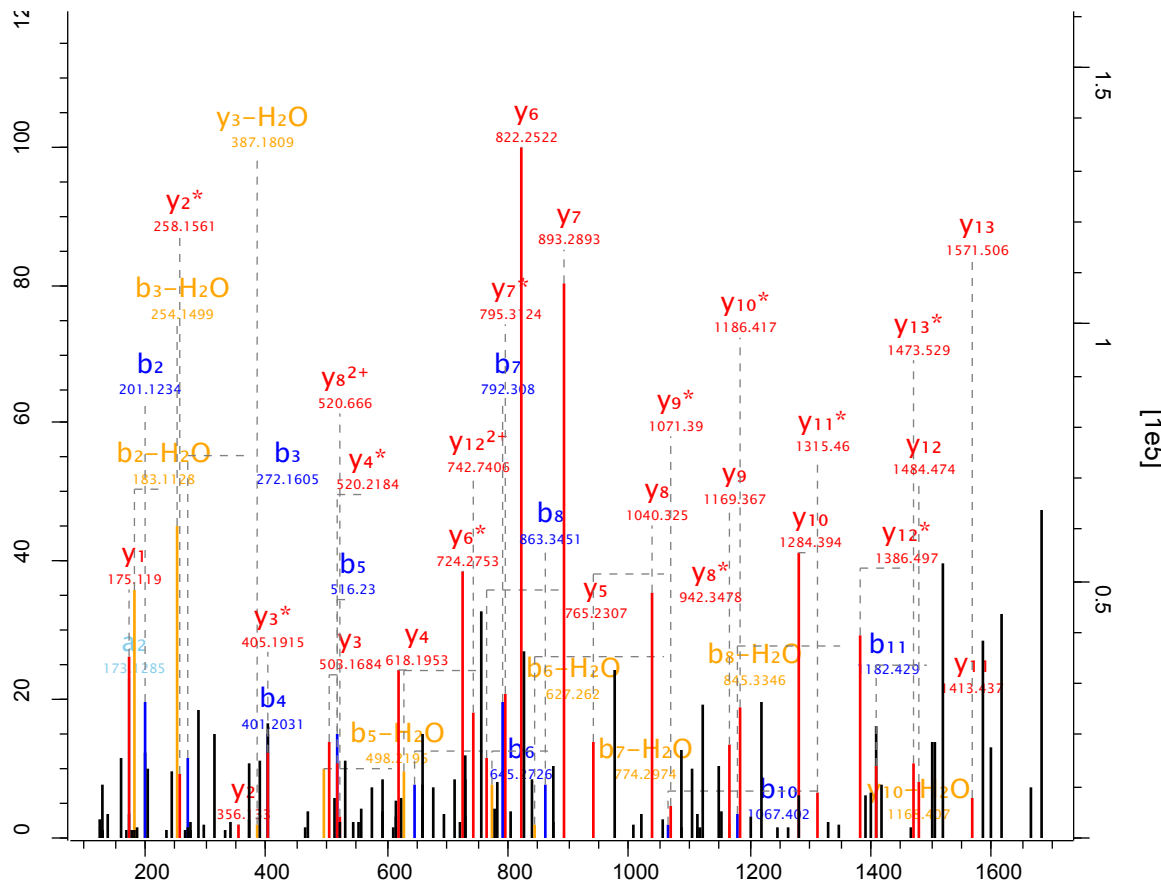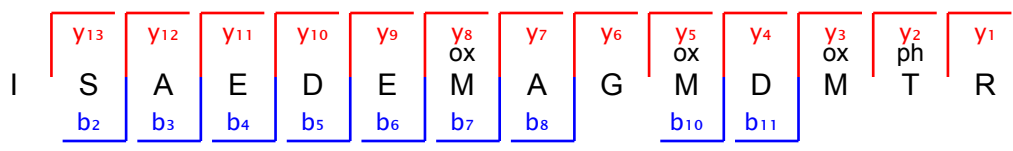

Raw file Scan Method Score m/z  
 Recip\_2\_34\_38 6696 FTMS; HCD 50.23 767.98

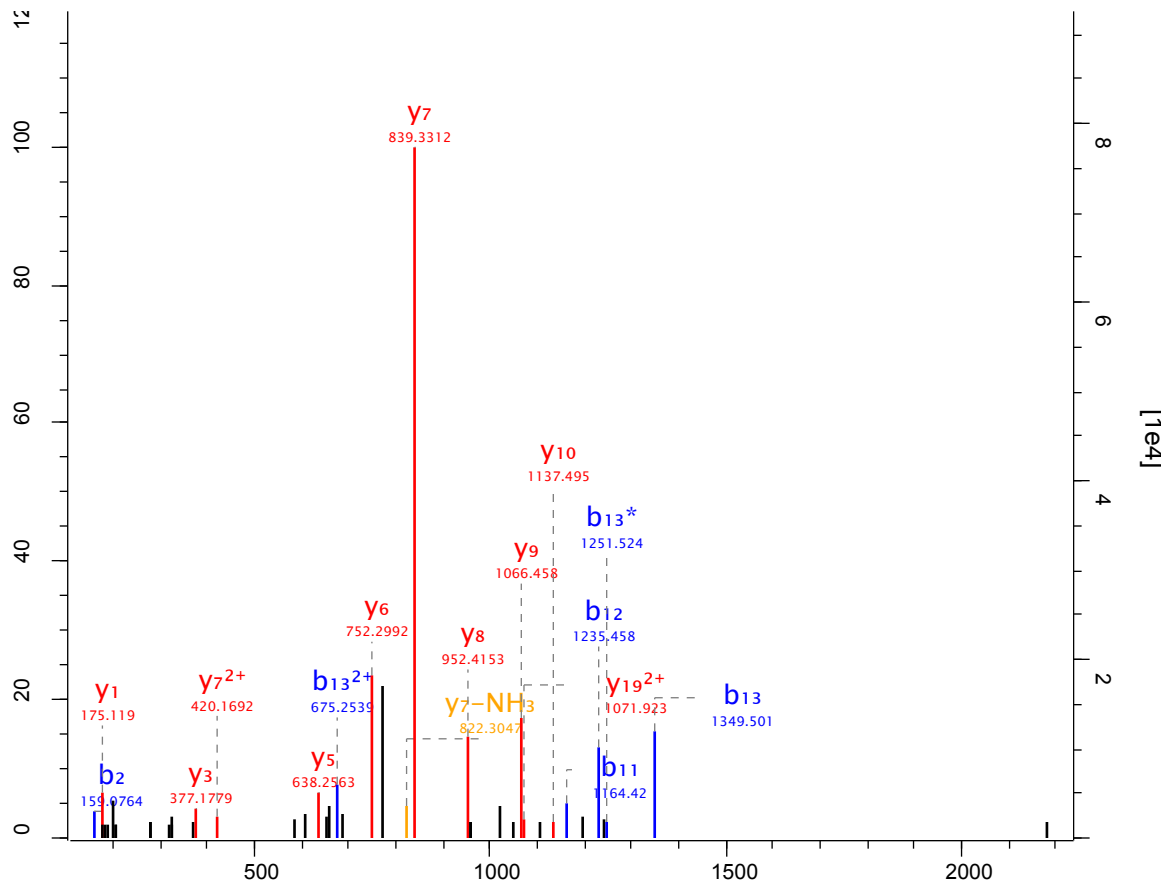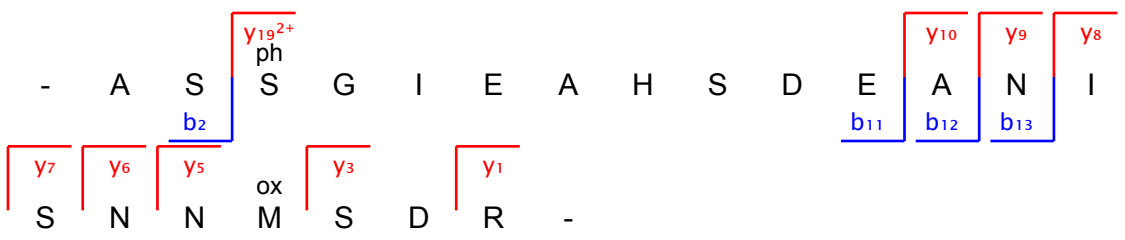

| Raw file      | Scan | Method    | Score | m/z   |
|---------------|------|-----------|-------|-------|
| Recip_2_34_38 | 6898 | FTMS; HCD | 87.15 | 430.7 |

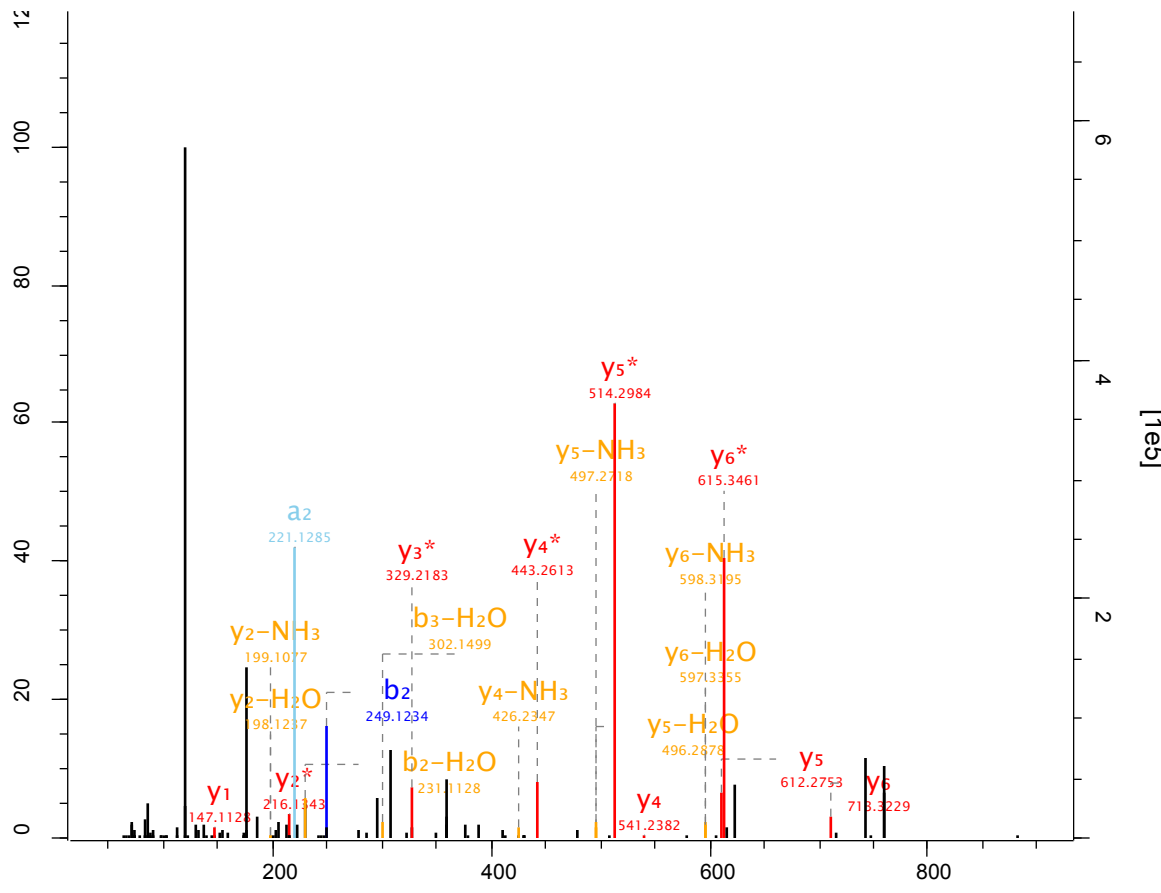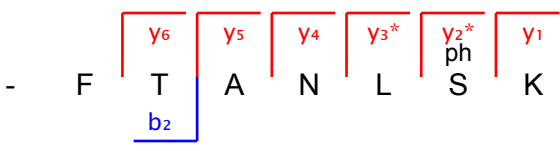

| Raw file      | Scan | Method    | Score | m/z    |
|---------------|------|-----------|-------|--------|
| Recip_2_34_38 | 6960 | FTMS; HCD | 53.77 | 543.93 |

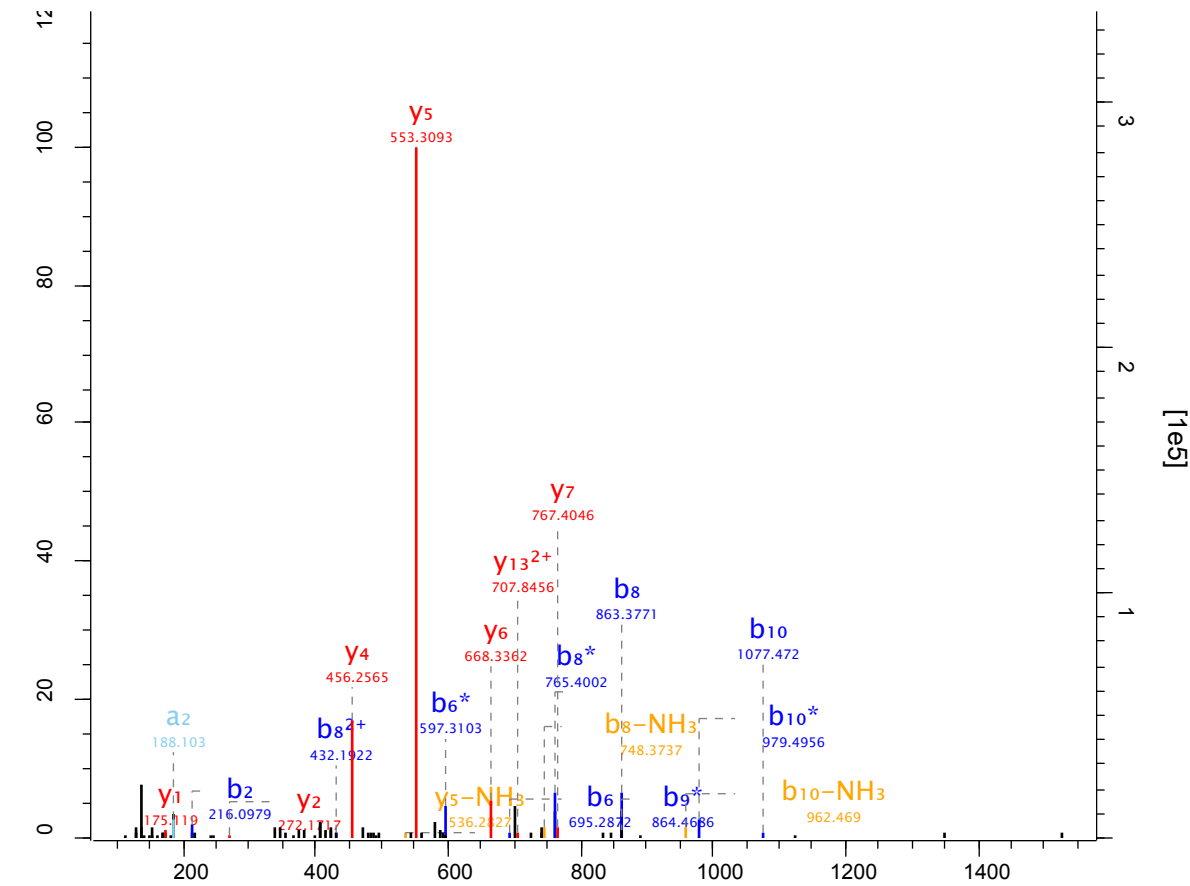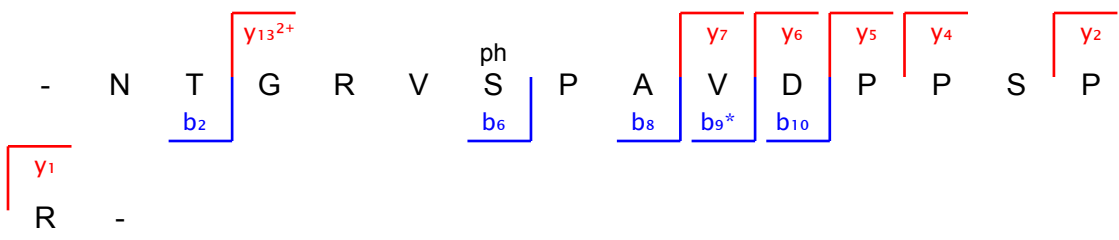

Raw file Scan Method Score m/z  
 Recip\_2\_34\_38 7307 FTMS; HCD 166.9 657.78

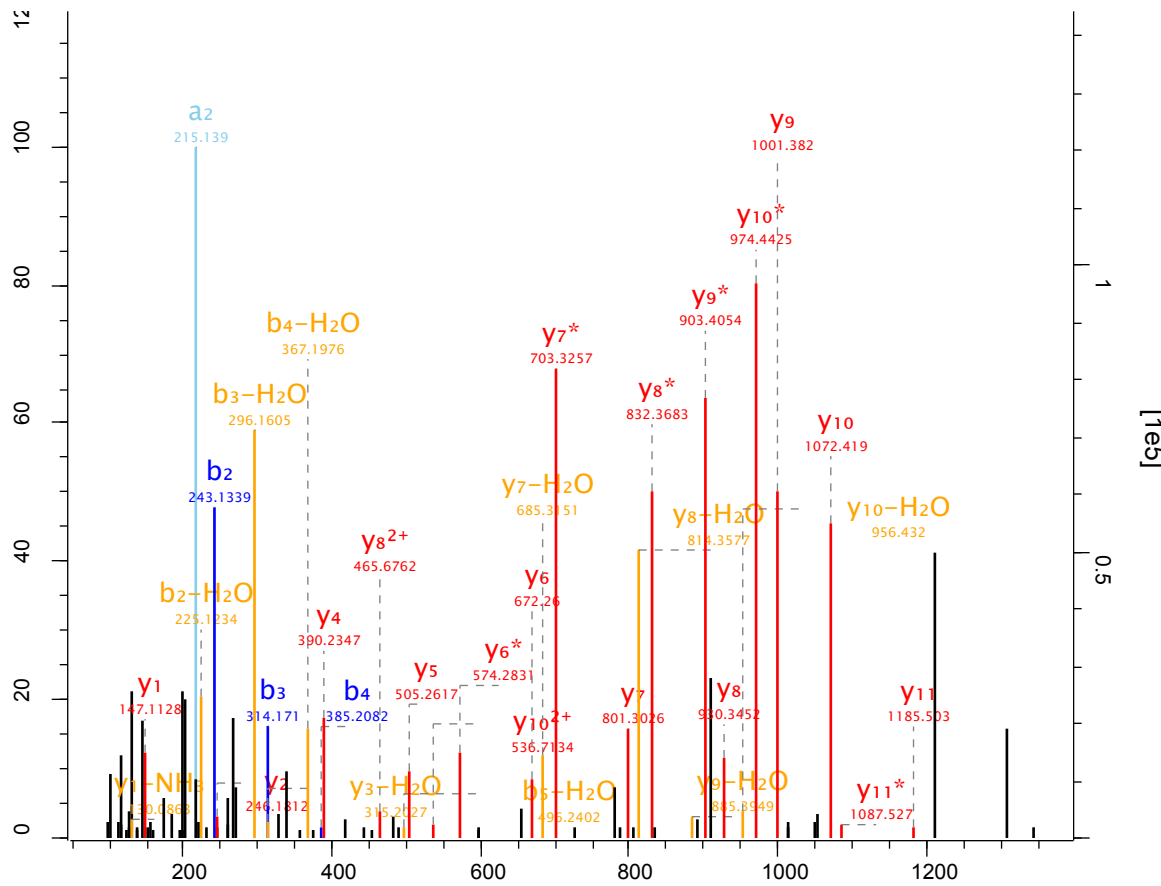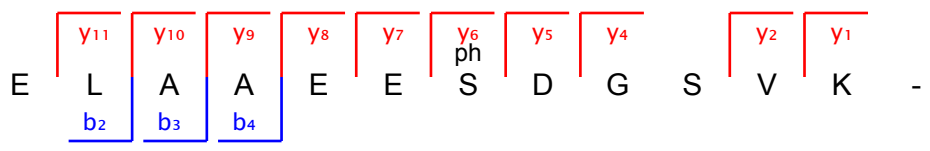



| Raw file      | Scan | Method    | Score | m/z    |
|---------------|------|-----------|-------|--------|
| Recip_2_34_38 | 7365 | FTMS; HCD | 52.58 | 579.73 |

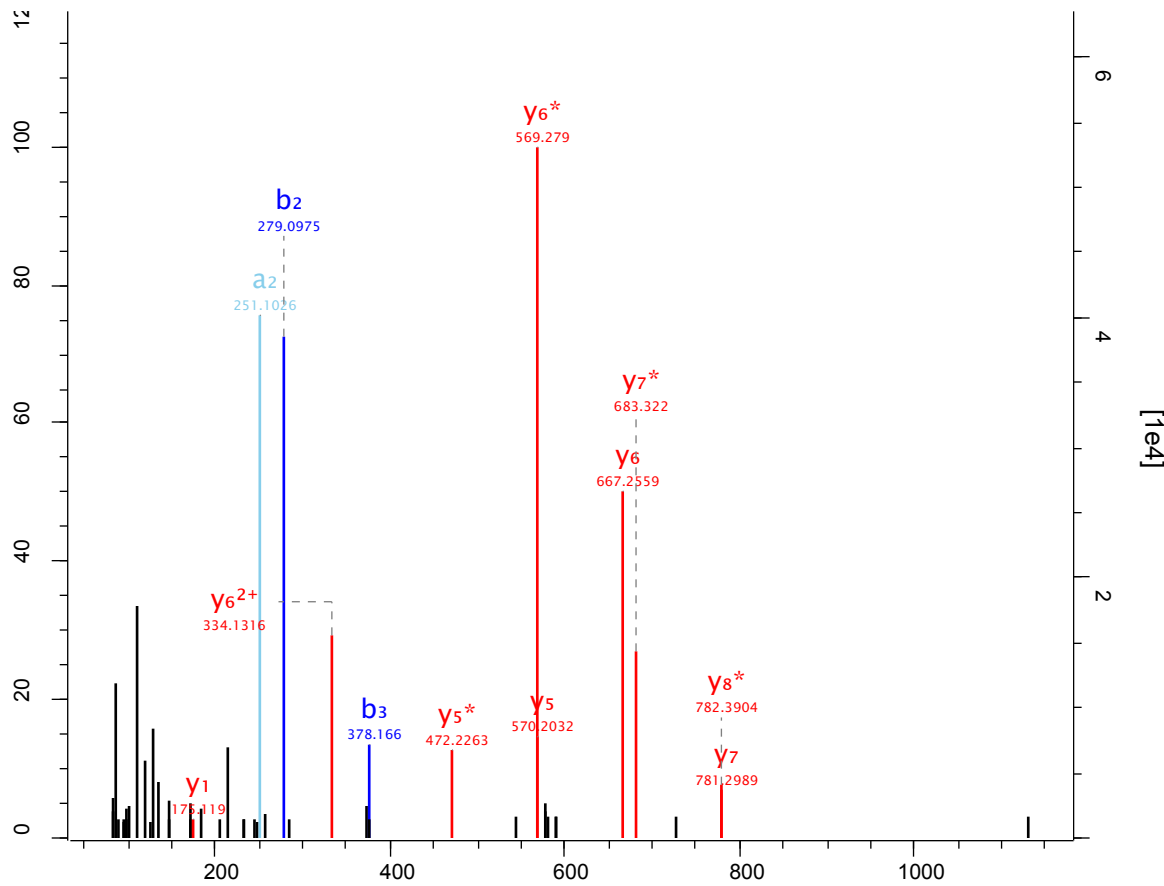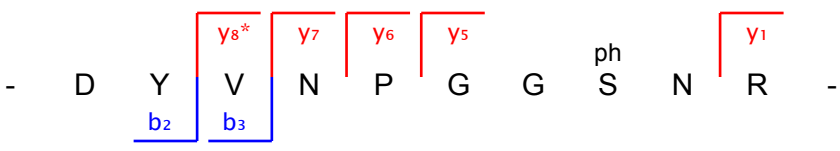

| Raw file      | Scan | Method    | Score | m/z    |
|---------------|------|-----------|-------|--------|
| Recip_2_34_38 | 7501 | FTMS; HCD | 46.07 | 590.76 |

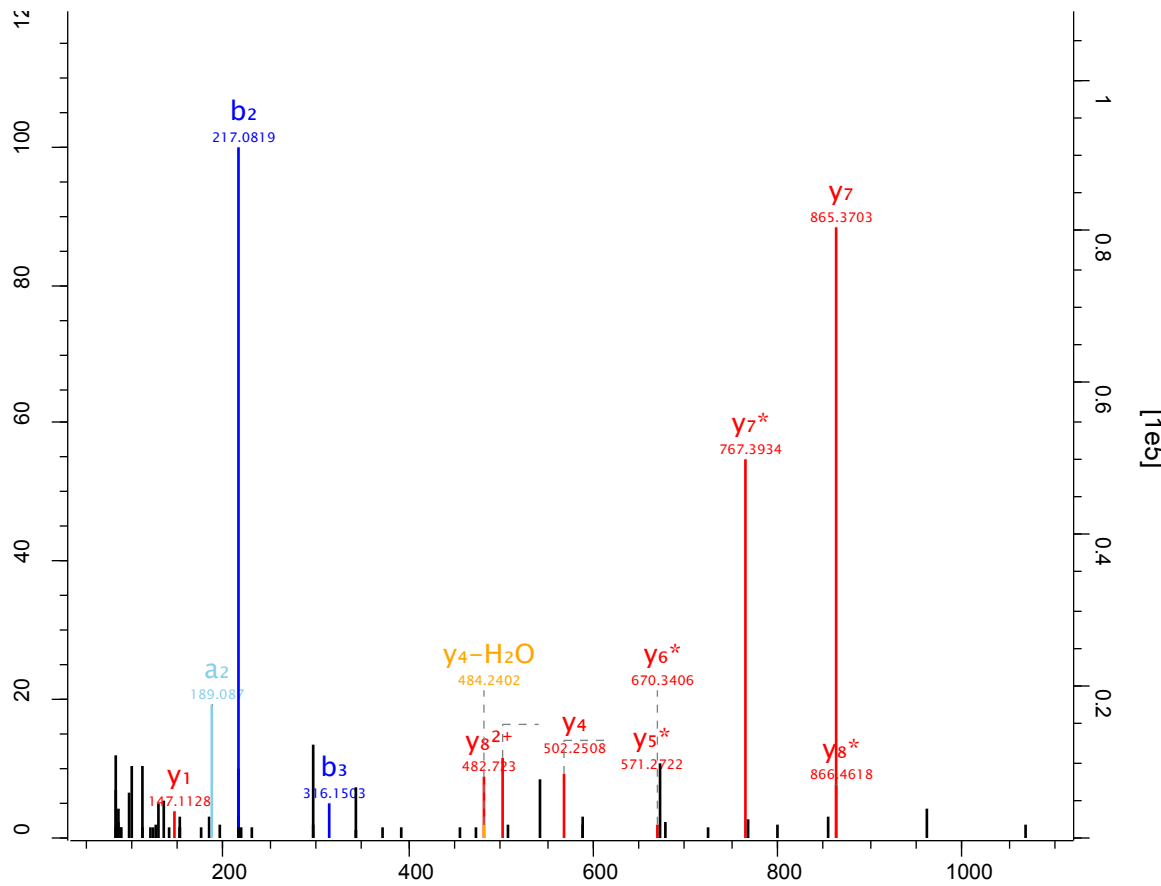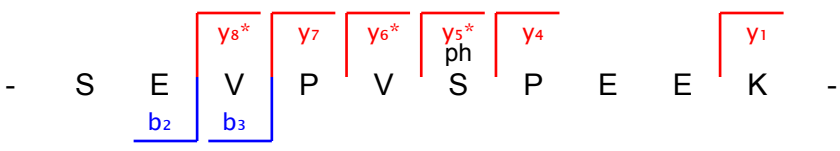

Raw file Scan Method Score m/z  
 Recip\_2\_34\_38 7504 FTMS; HCD 117.2 627.27

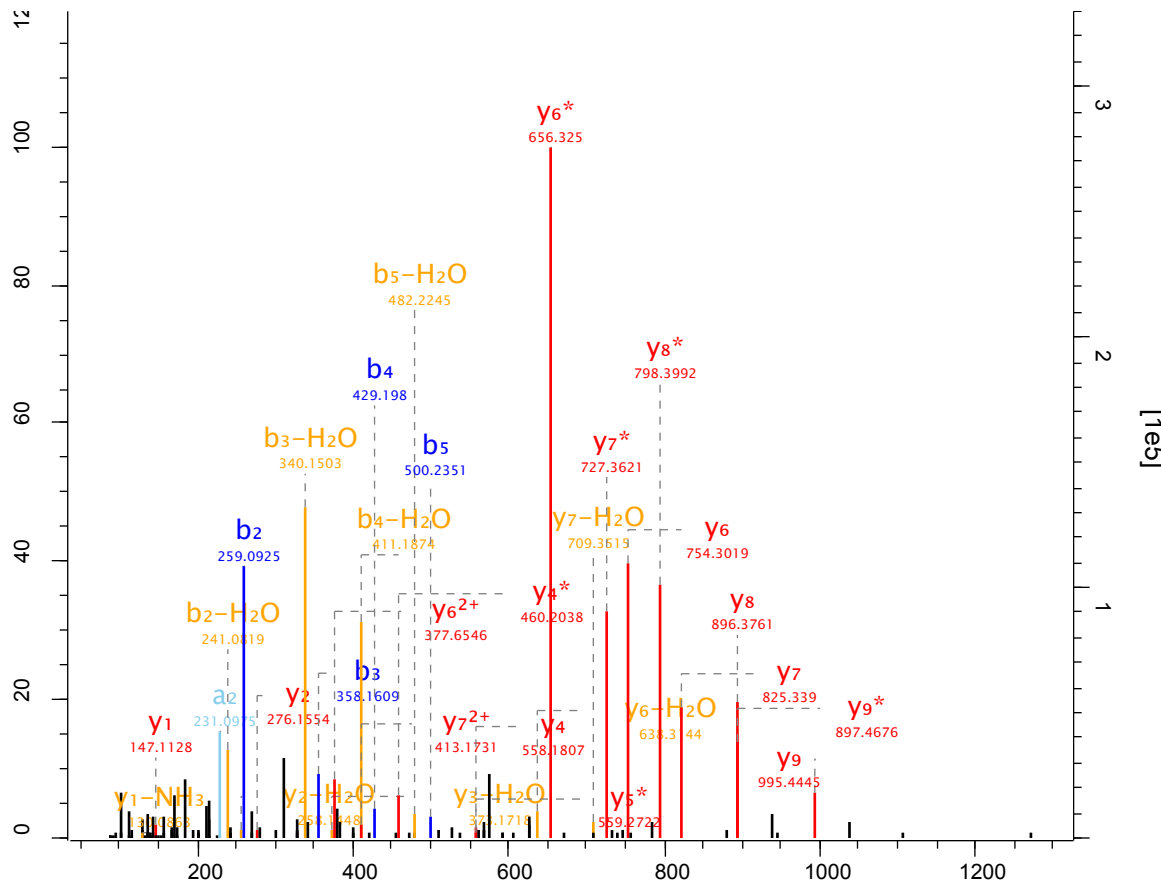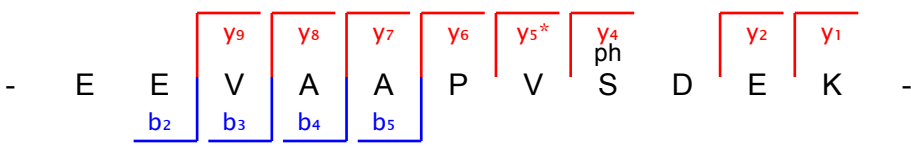

Raw file Scan Method Score m/z  
 Recip\_2\_34\_38 7580 FTMS; HCD 106.19 697.78

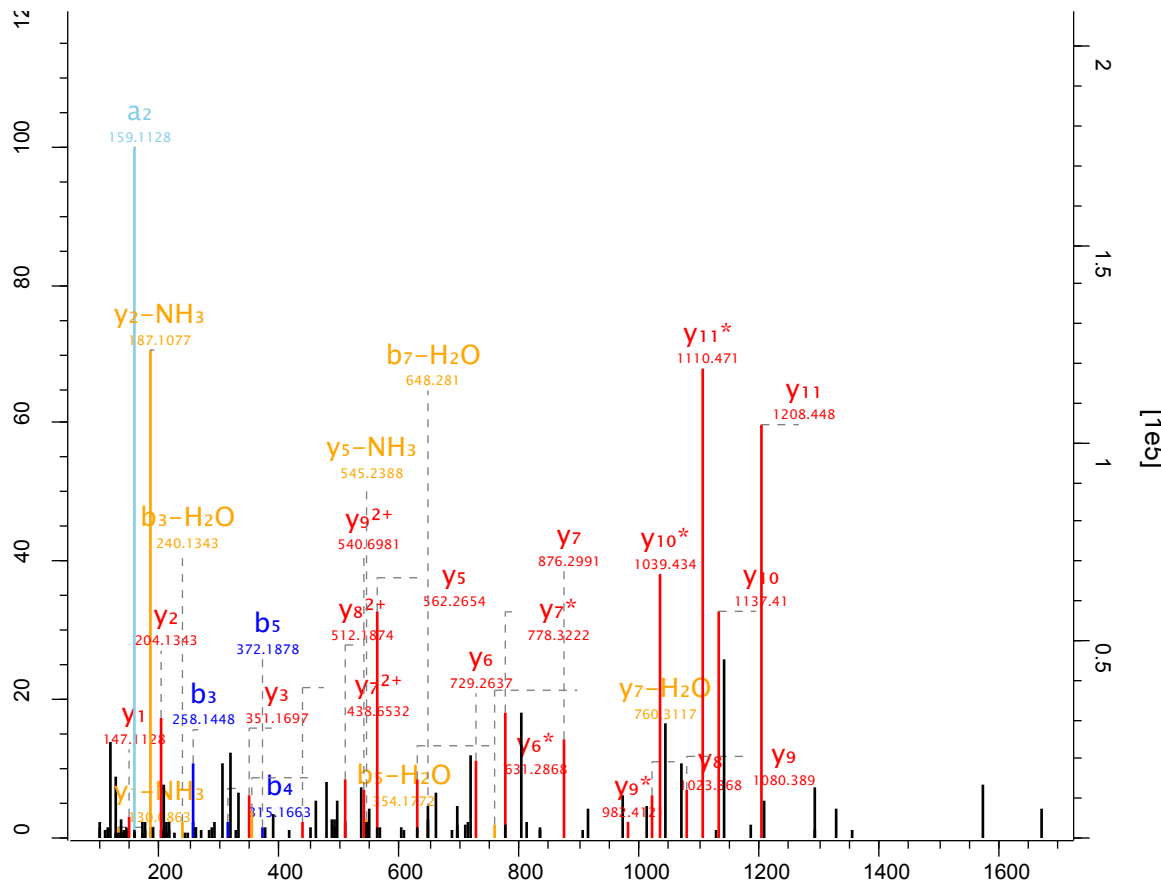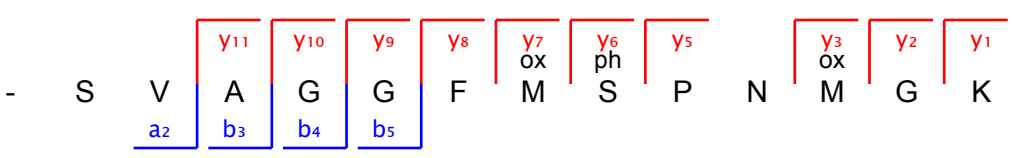

Raw file Scan Method Score m/z  
 Recip\_2\_34\_38 7584 FTMS; HCD 160.78 700.3

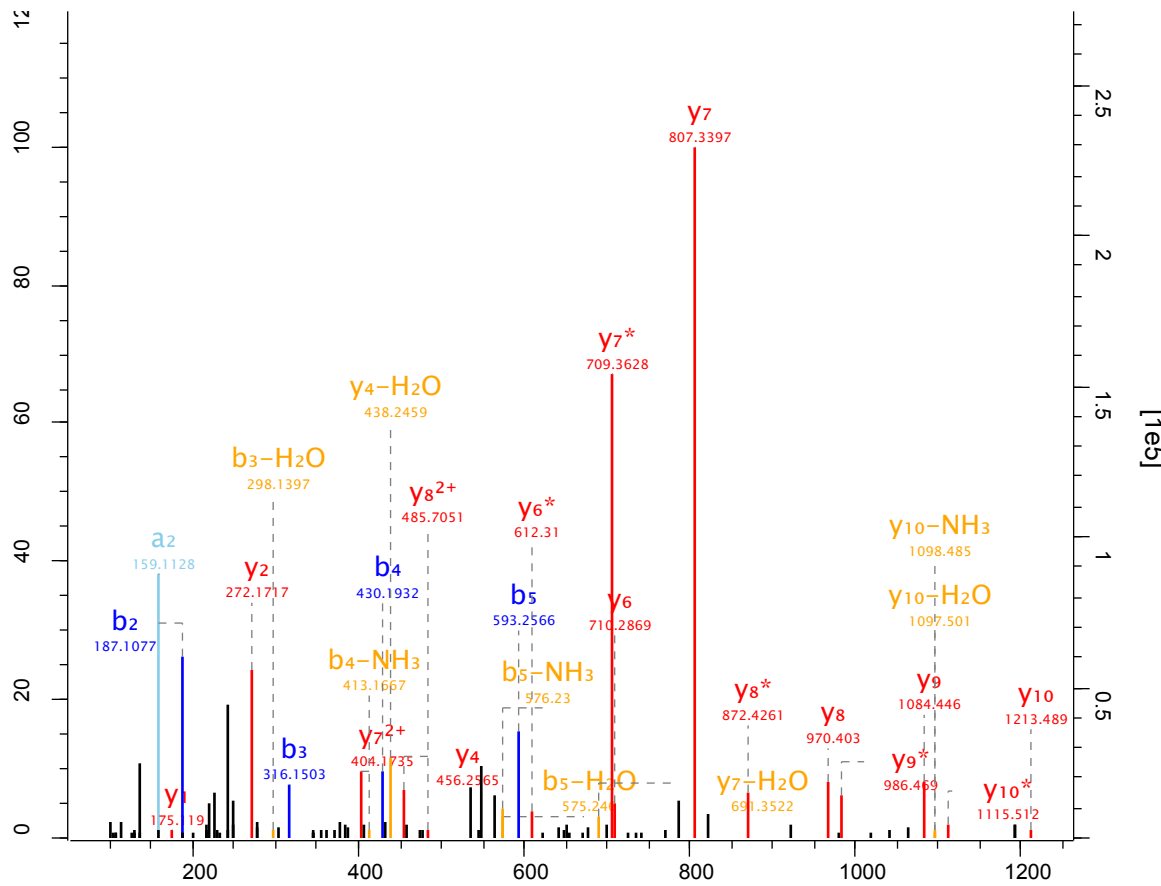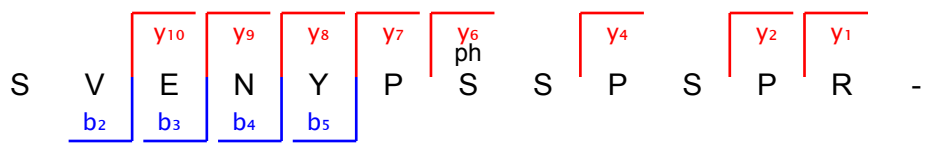

| Raw file      | Scan | Method    | Score | m/z    |
|---------------|------|-----------|-------|--------|
| Recip_2_34_38 | 7642 | FTMS; HCD | 63.47 | 506.25 |

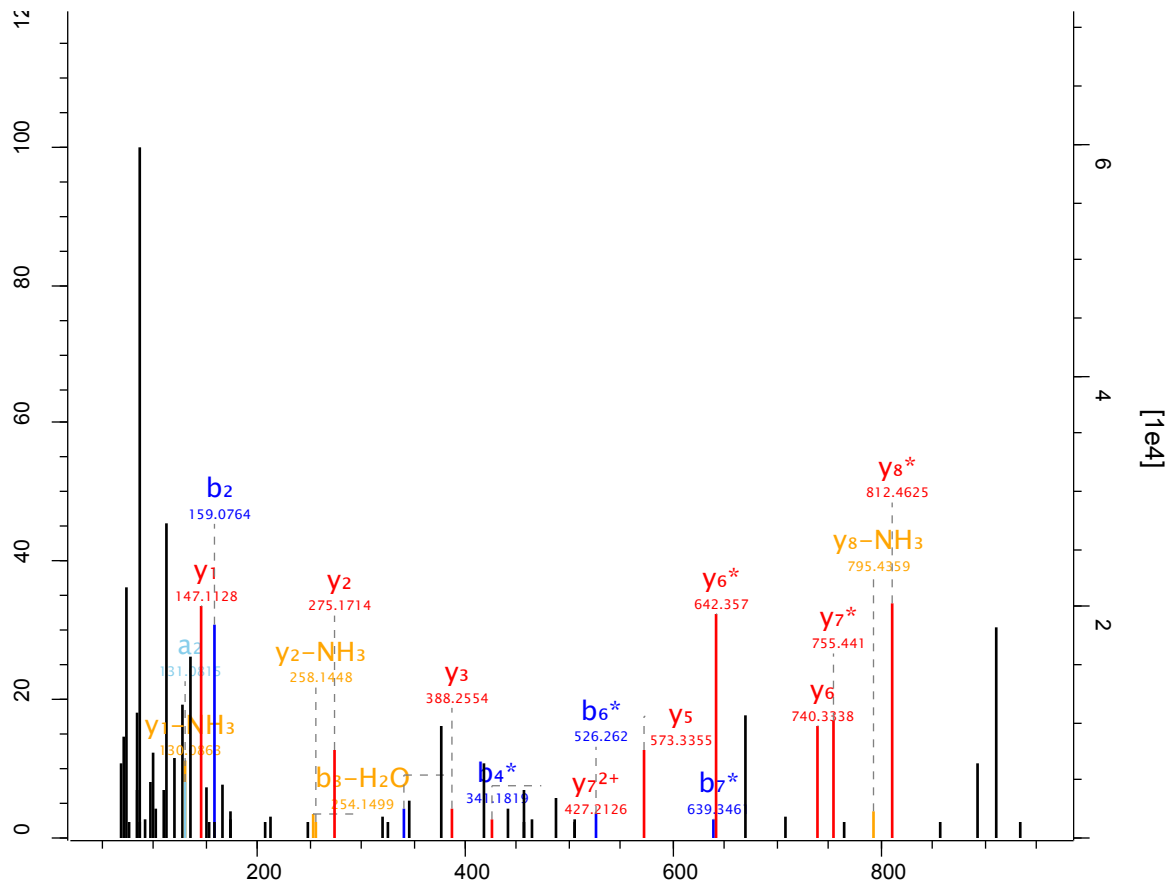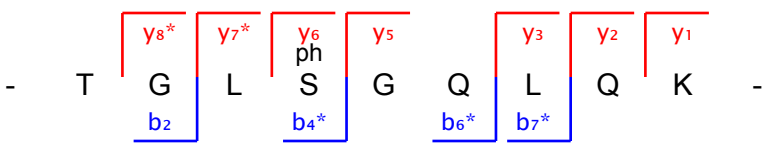

Raw file Scan Method Score m/z  
 Recip\_2\_34\_38 7806 FTMS; HCD 134.68 671.75

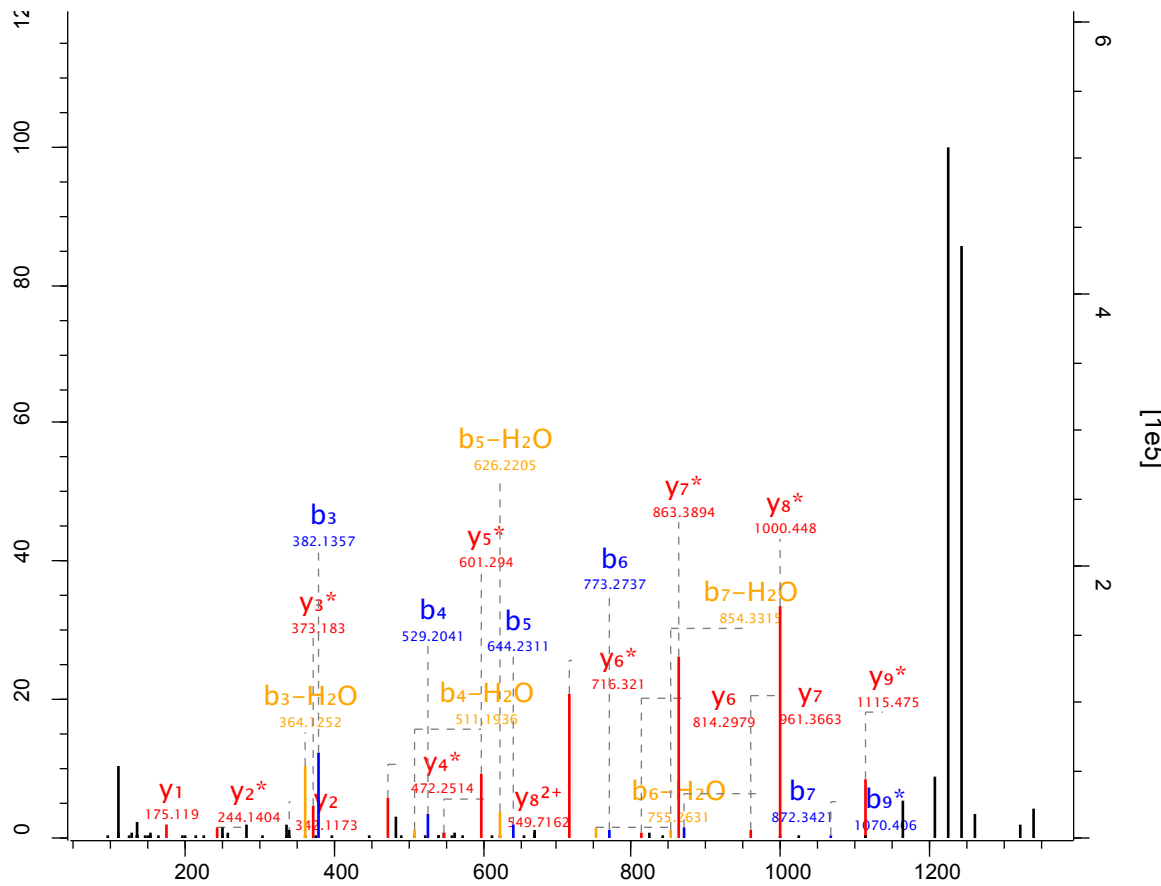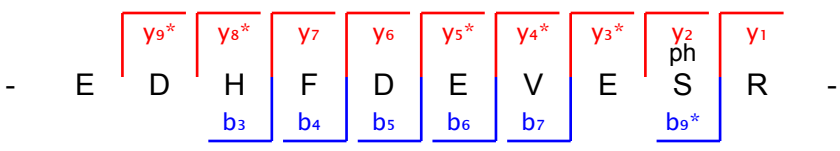

| Raw file      | Scan | Method    | Score | m/z    |
|---------------|------|-----------|-------|--------|
| Recip_2_34_38 | 7854 | FTMS; HCD | 40.48 | 653.79 |

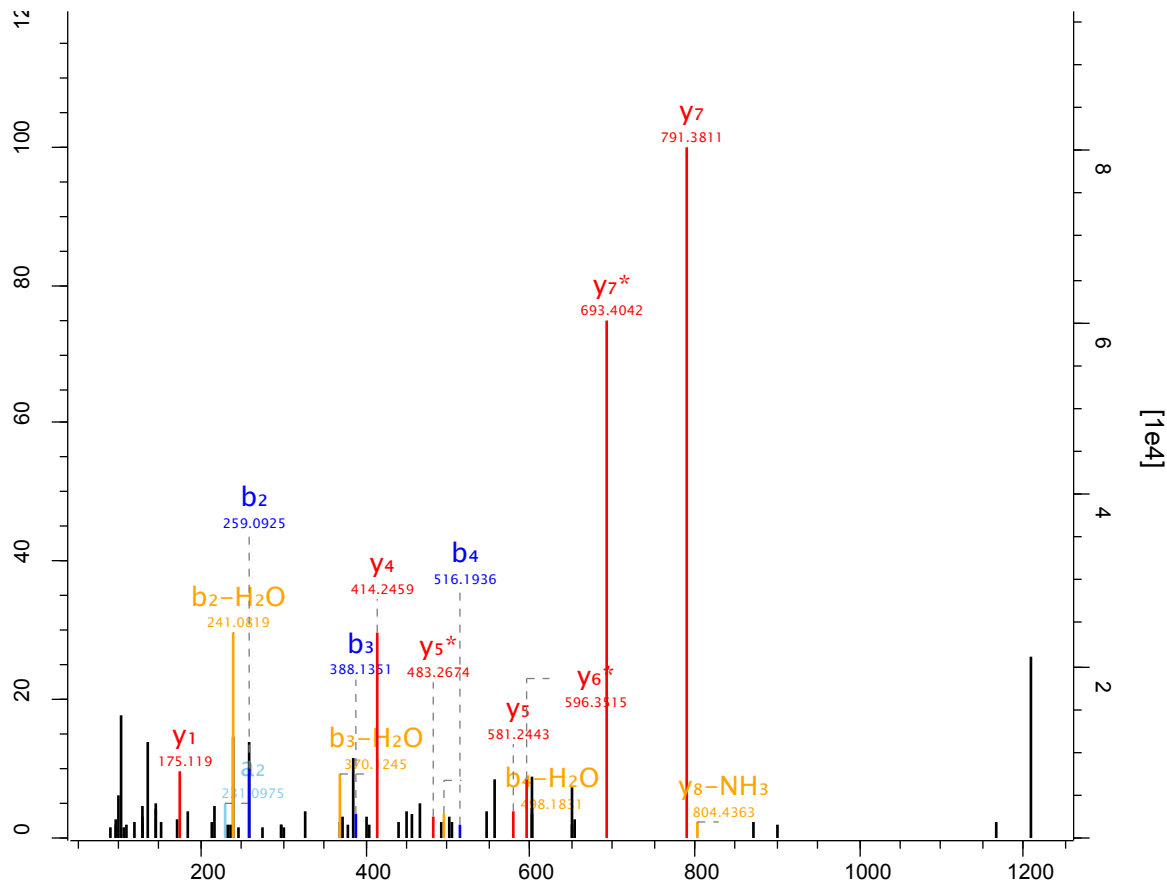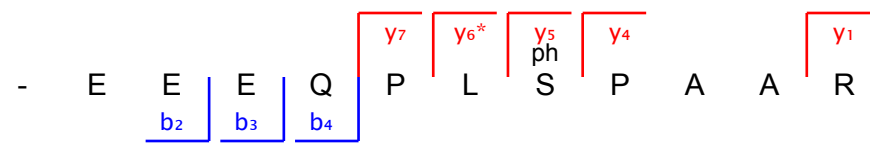



Raw file Scan Method Score m/z  
 Recip\_2\_34\_38 7857 FTMS; HCD 171.49 572.28

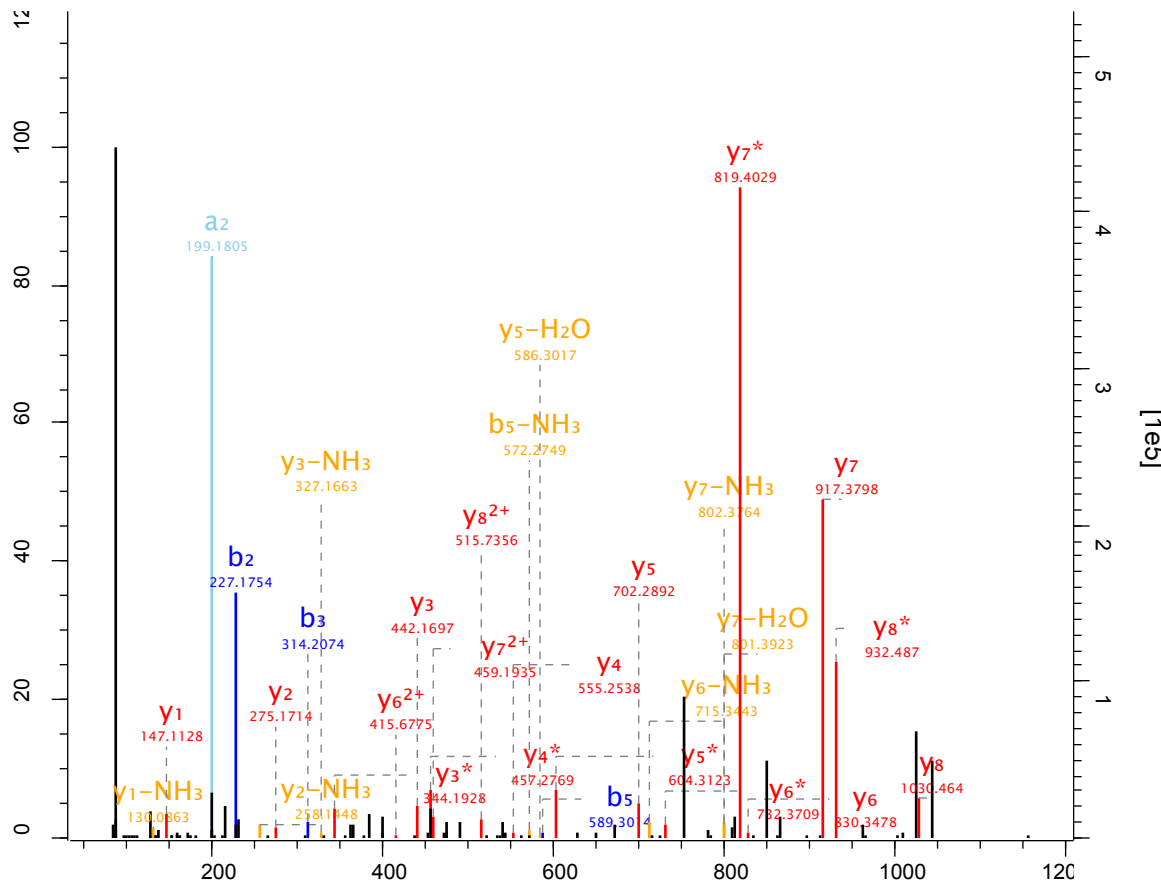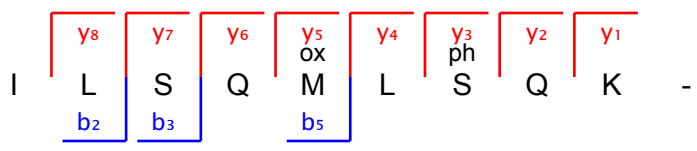

| Raw file      | Scan | Method    | Score | m/z    |
|---------------|------|-----------|-------|--------|
| Recip_2_34_38 | 7930 | FTMS; HCD | 61.17 | 588.24 |

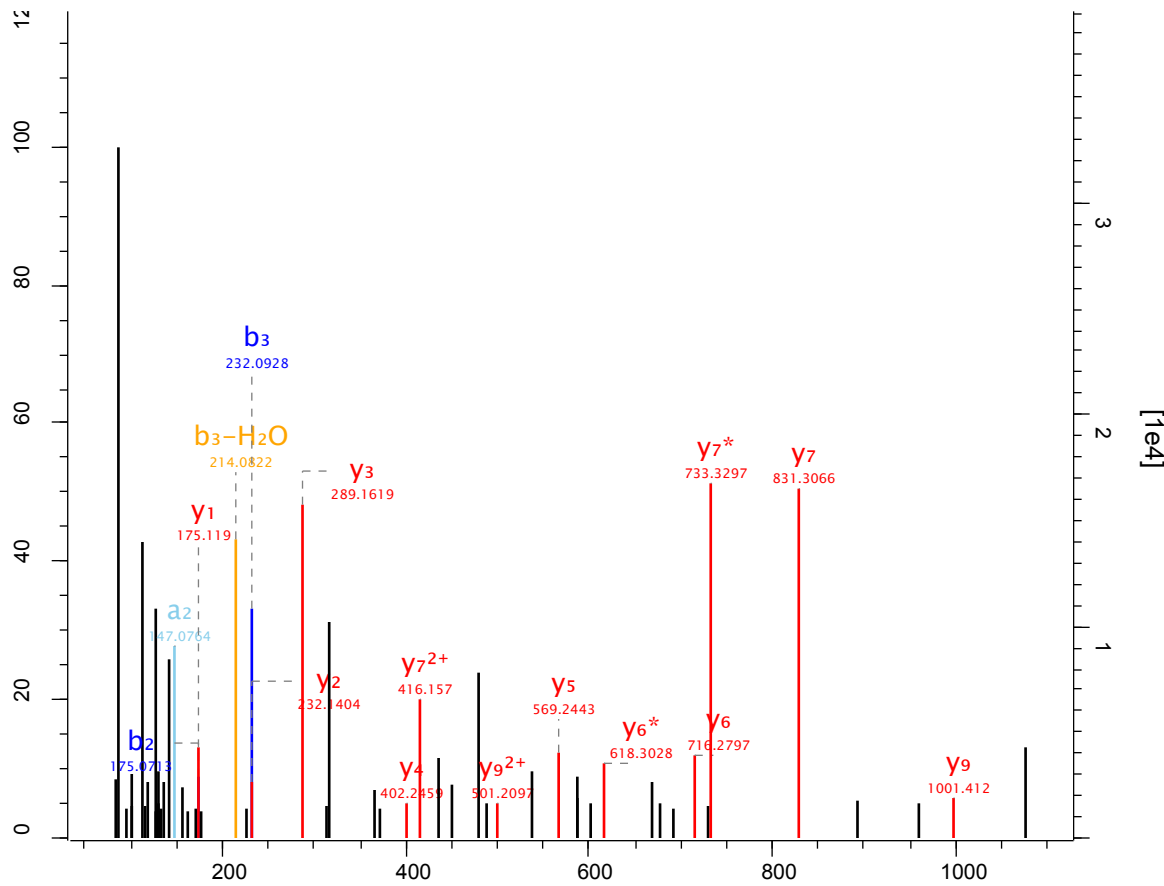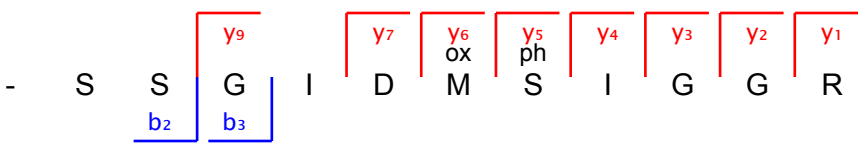

Raw file Scan Method Score m/z  
 Recip\_2\_34\_38 8270 FTMS; HCD 122.49 842.8

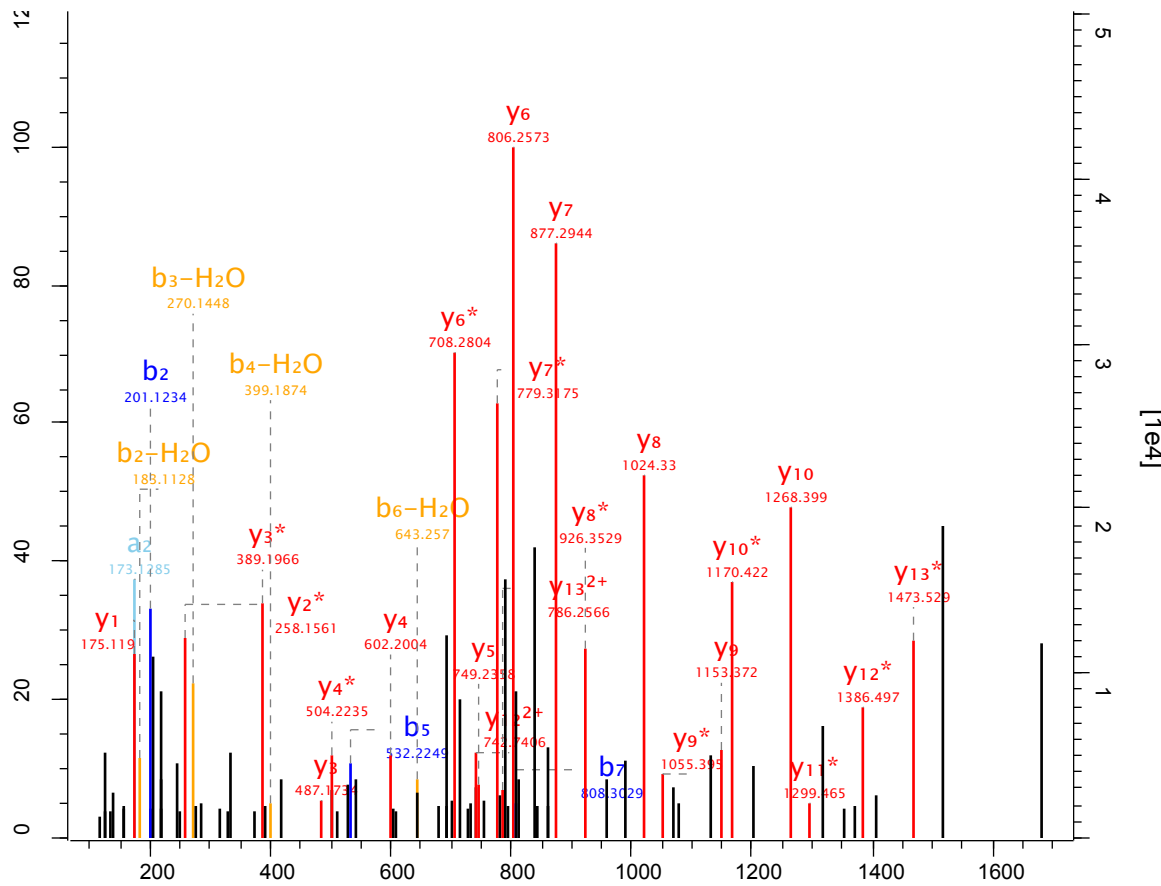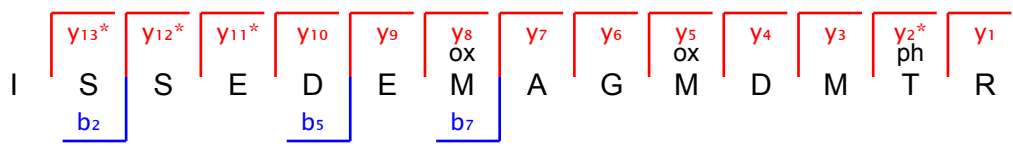

| Raw file      | Scan | Method    | Score | m/z    |
|---------------|------|-----------|-------|--------|
| Recip_2_34_38 | 8528 | FTMS; HCD | 42.12 | 980.97 |

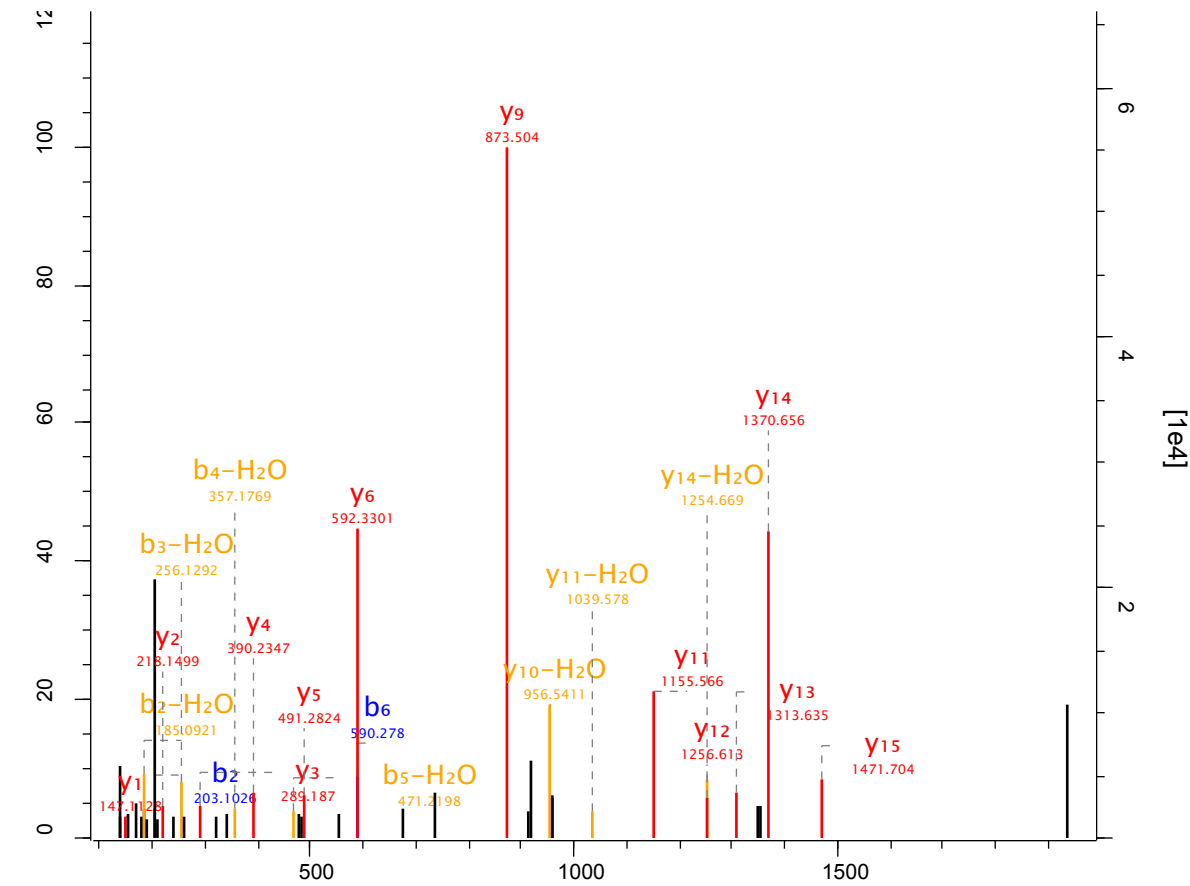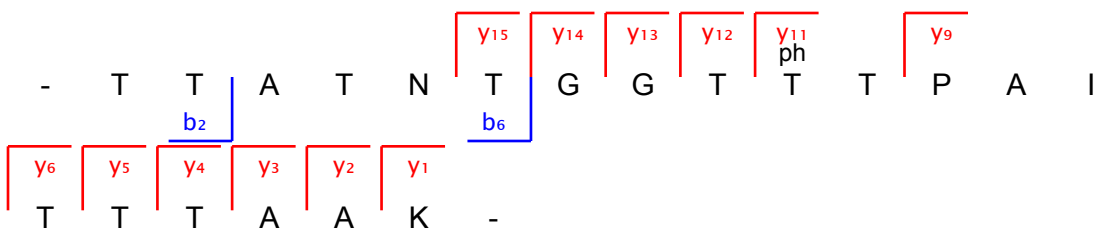

Raw file Scan Method Score m/z  
 Recip\_2\_34\_38 8695 FTMS; HCD 199.3 572.25

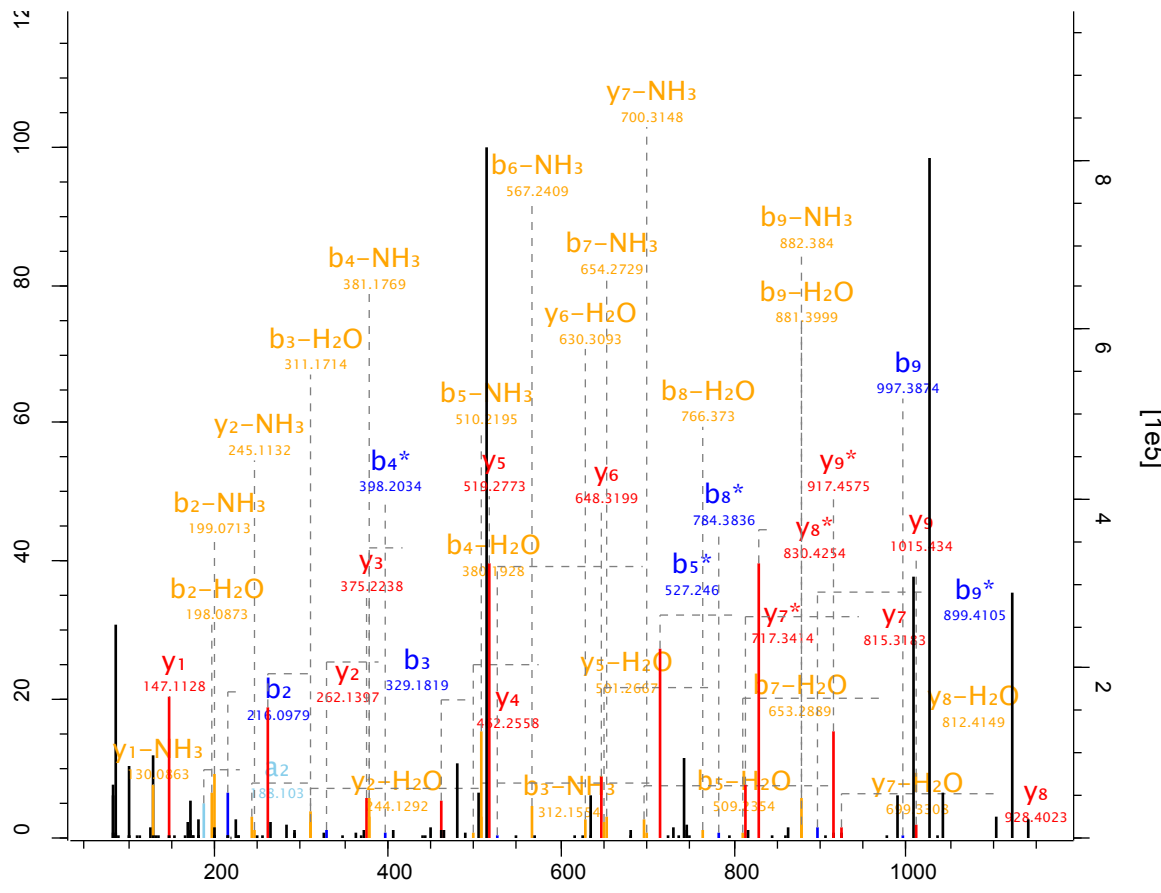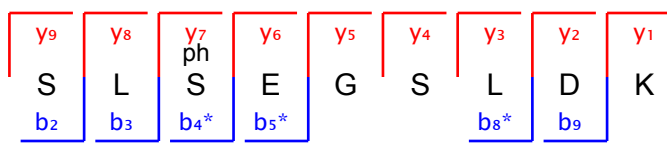

| Raw file      | Scan | Method    | Score | m/z    |
|---------------|------|-----------|-------|--------|
| Recip_2_34_38 | 8707 | FTMS; HCD | 63.22 | 916.88 |

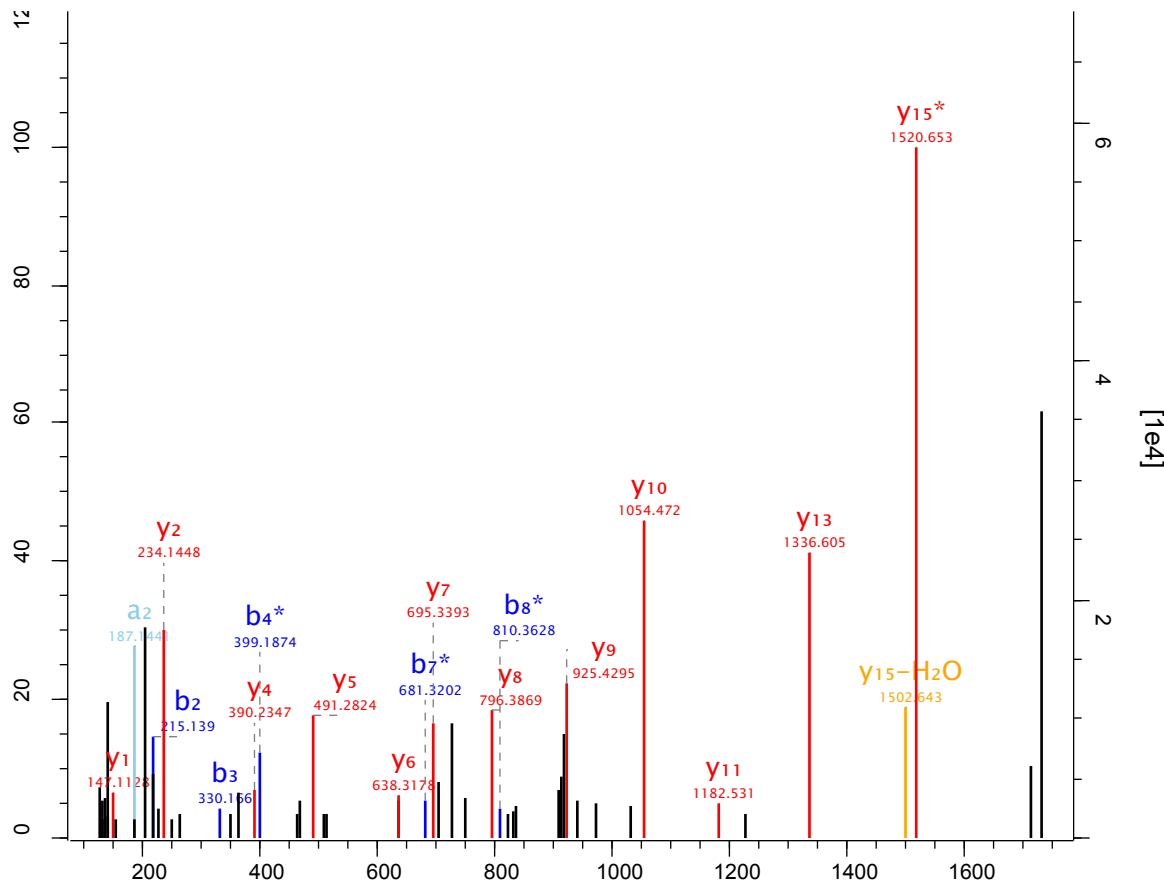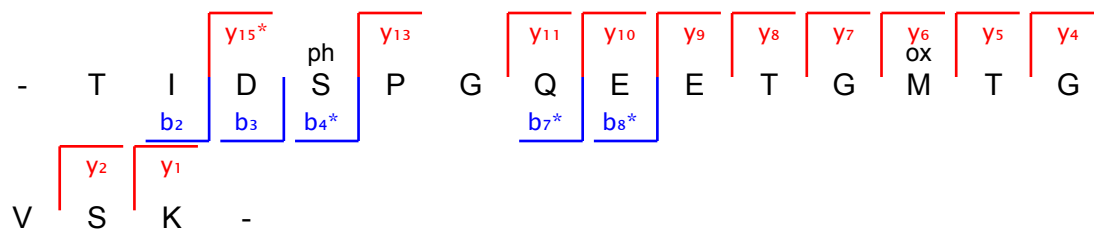

Raw file Scan Method Score m/z  
 Recip\_2\_34\_38 8815 FTMS; HCD 136.7 561.76

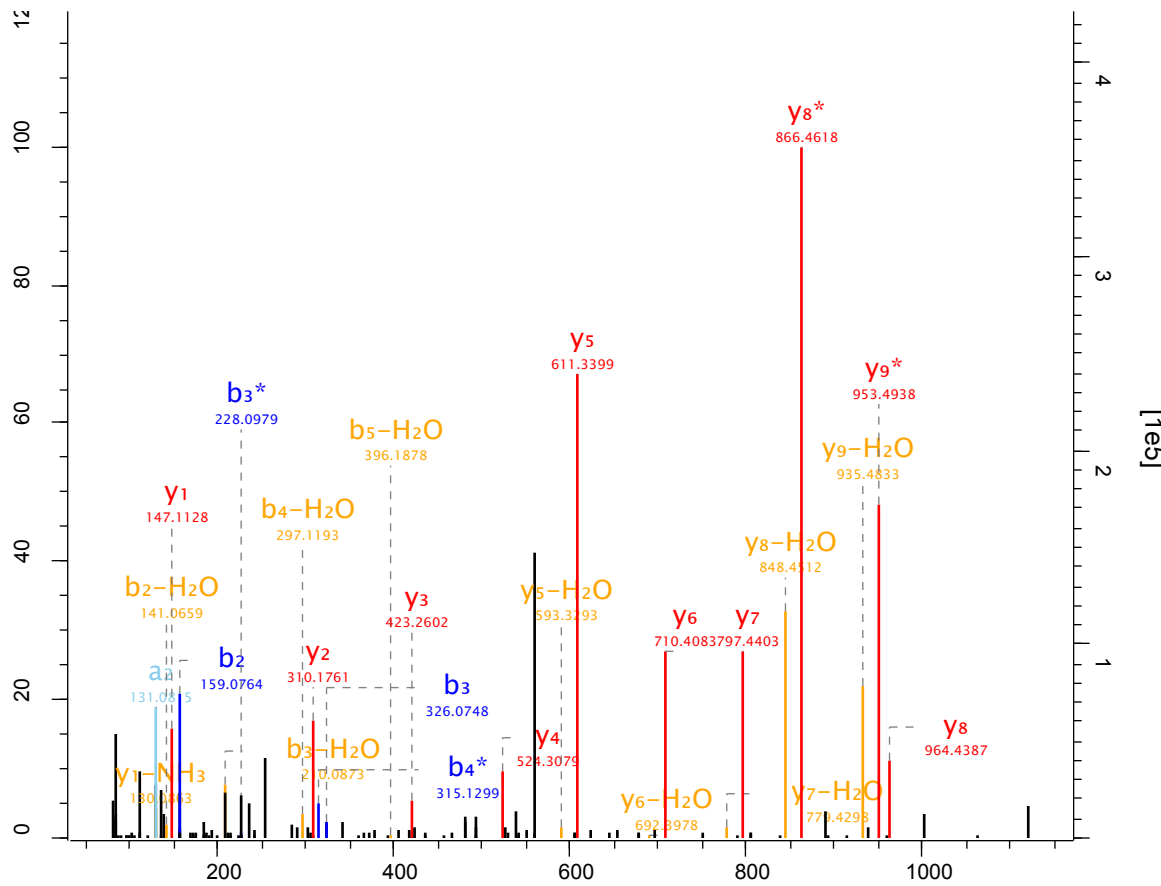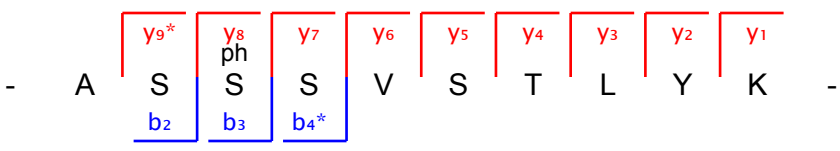

Raw file Scan Method Score m/z  
 Recip\_2\_34\_38 8822 FTMS; HCD 86.8 707.31

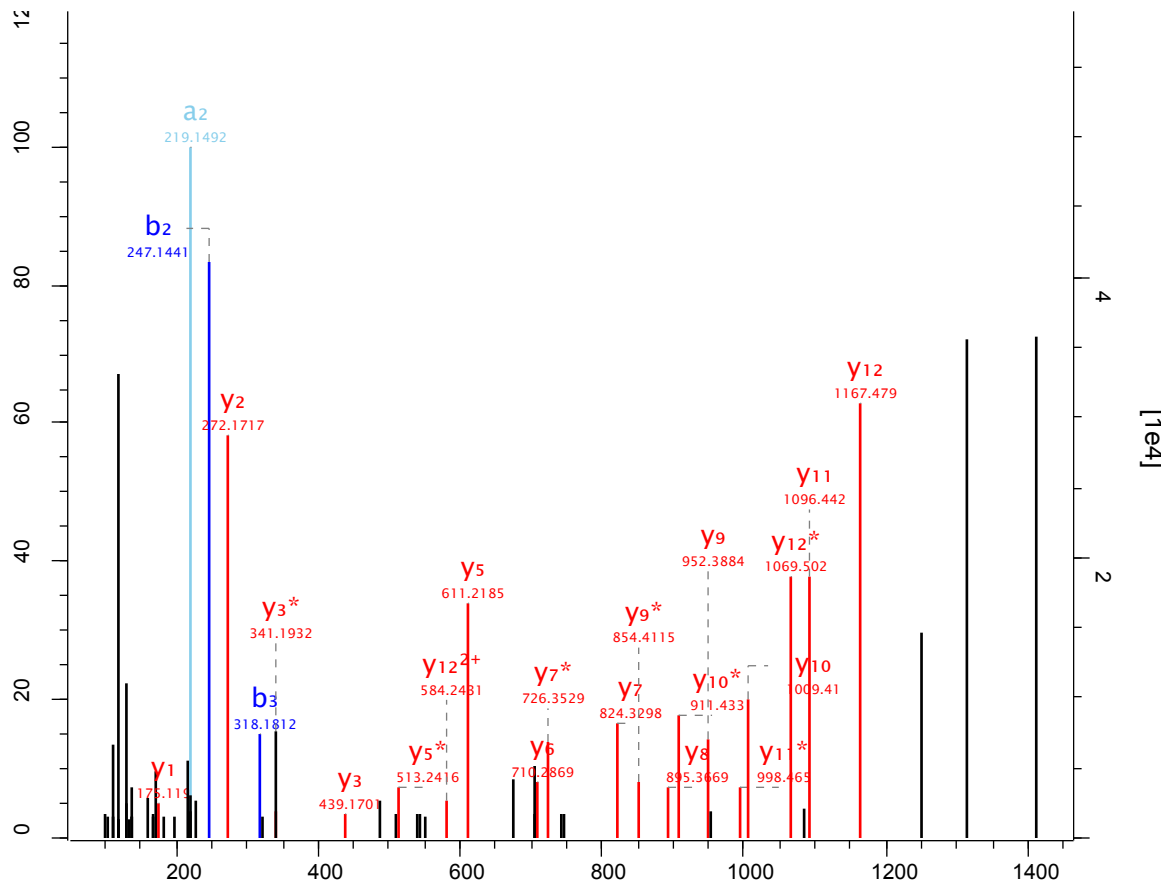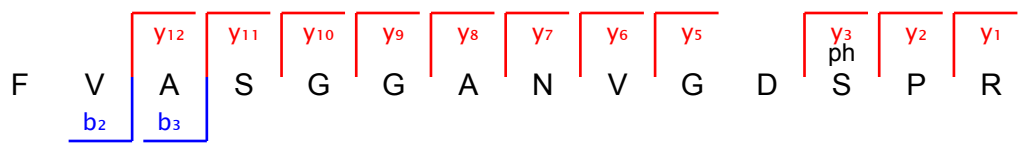



Raw file Scan Method Score m/z  
 Recip\_2\_34\_38 8881 FTMS; HCD 82.01 710.83

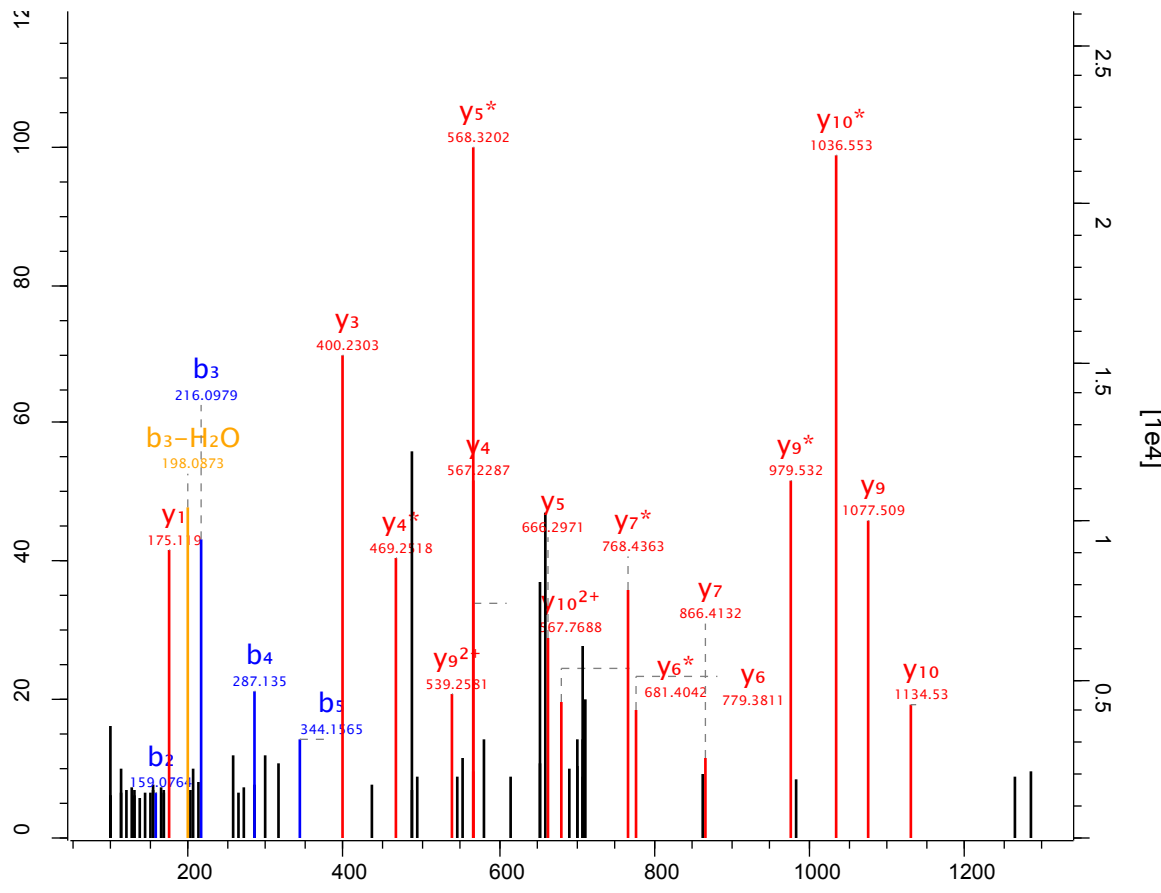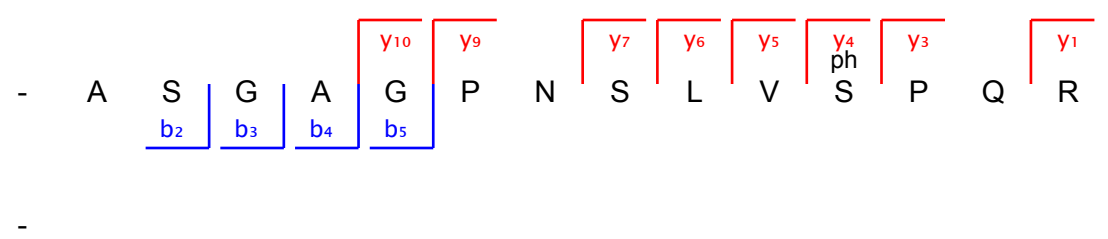

Raw file Scan Method Score m/z  
 Recip\_2\_34\_38 8916 FTMS; HCD 143.64 628.28

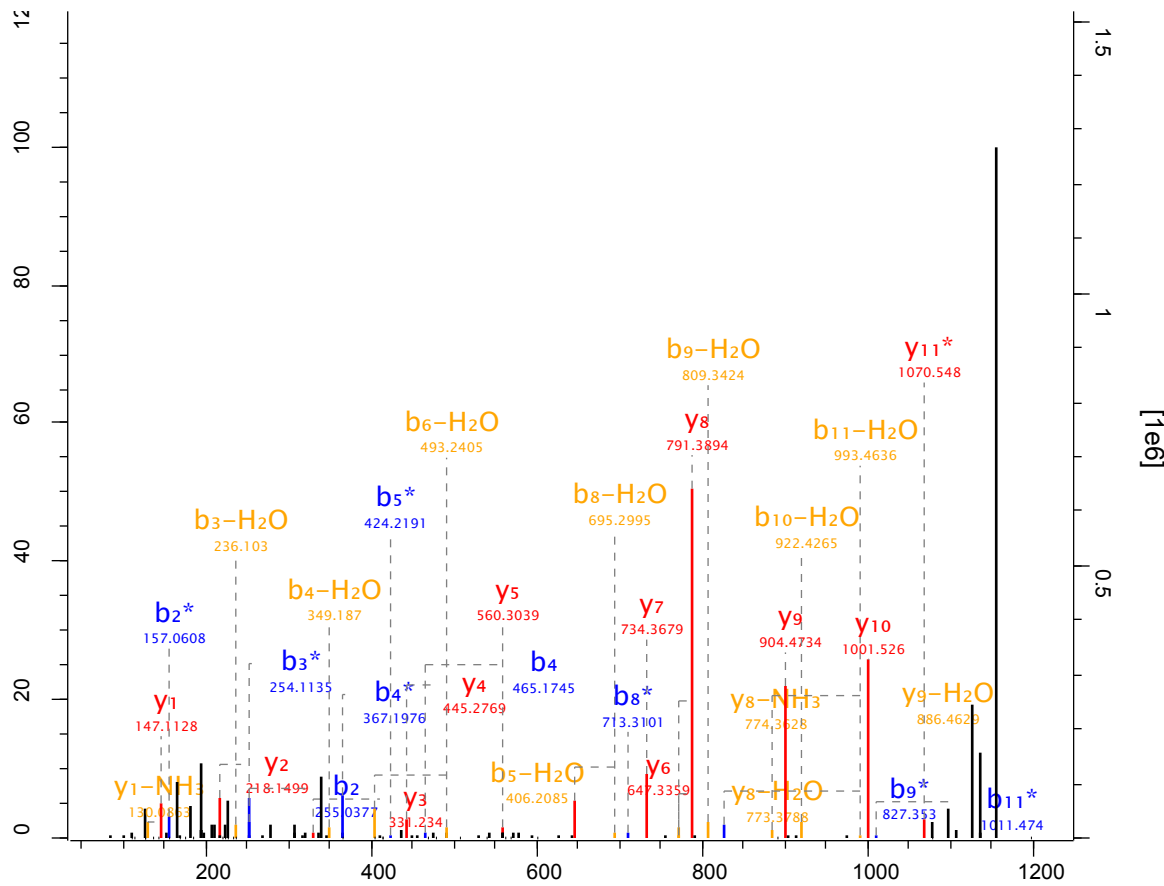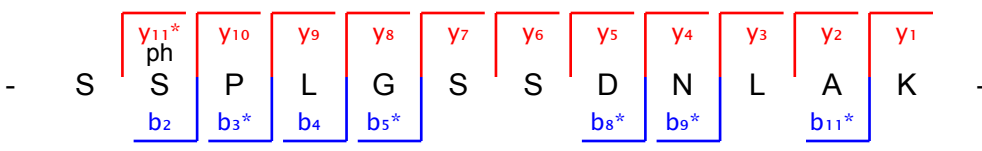

Raw file Scan Method Score m/z  
 Recip\_2\_34\_38 8954 FTMS; HCD 150.76 601.28

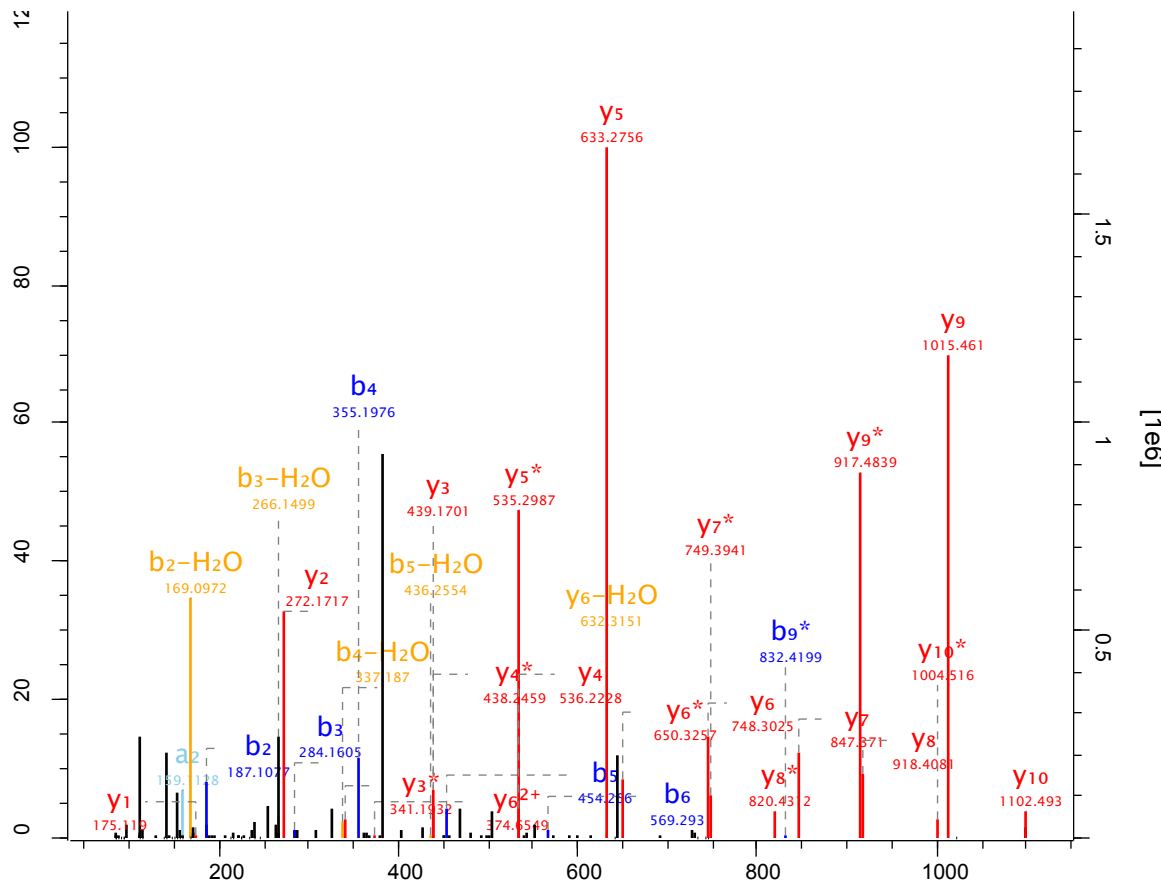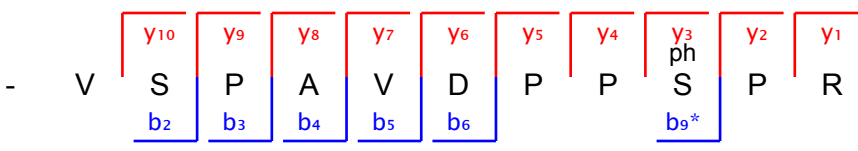

Raw file Scan Method Score m/z  
 Recip\_2\_34\_38 8976 FTMS; HCD 170 680.76

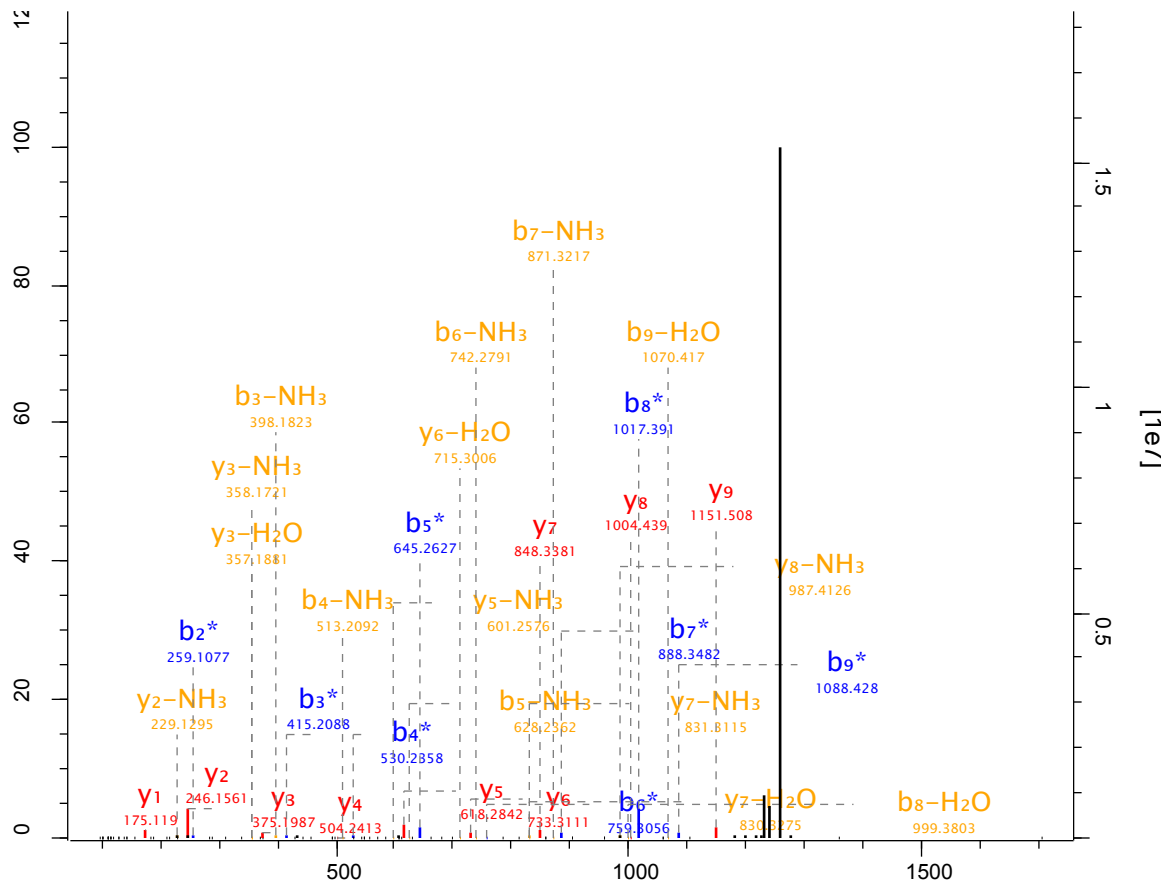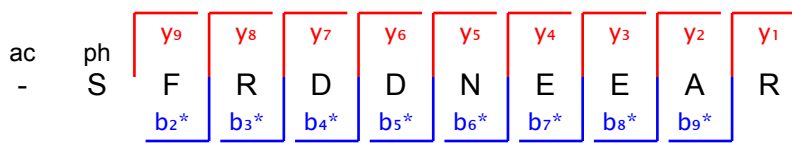

| Raw file      | Scan | Method    | Score | m/z    |
|---------------|------|-----------|-------|--------|
| Recip_2_34_38 | 9005 | FTMS; HCD | 84.61 | 504.21 |

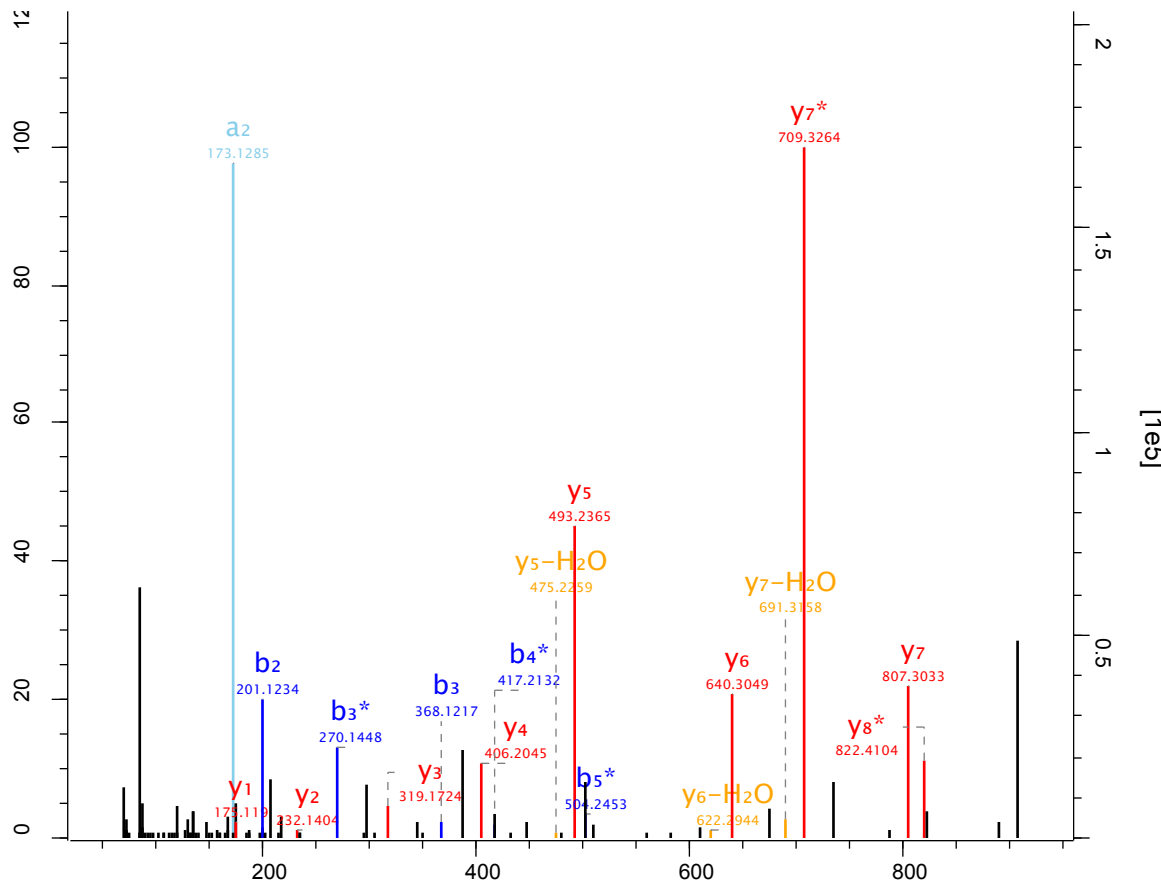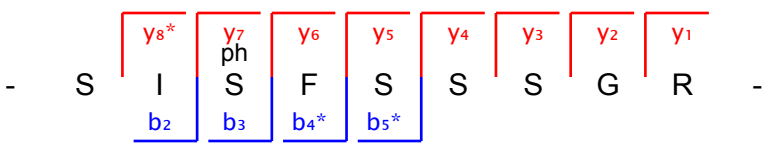

| Raw file      | Scan | Method    | Score | m/z    |
|---------------|------|-----------|-------|--------|
| Recip_2_34_38 | 9007 | FTMS; HCD | 63.69 | 643.77 |

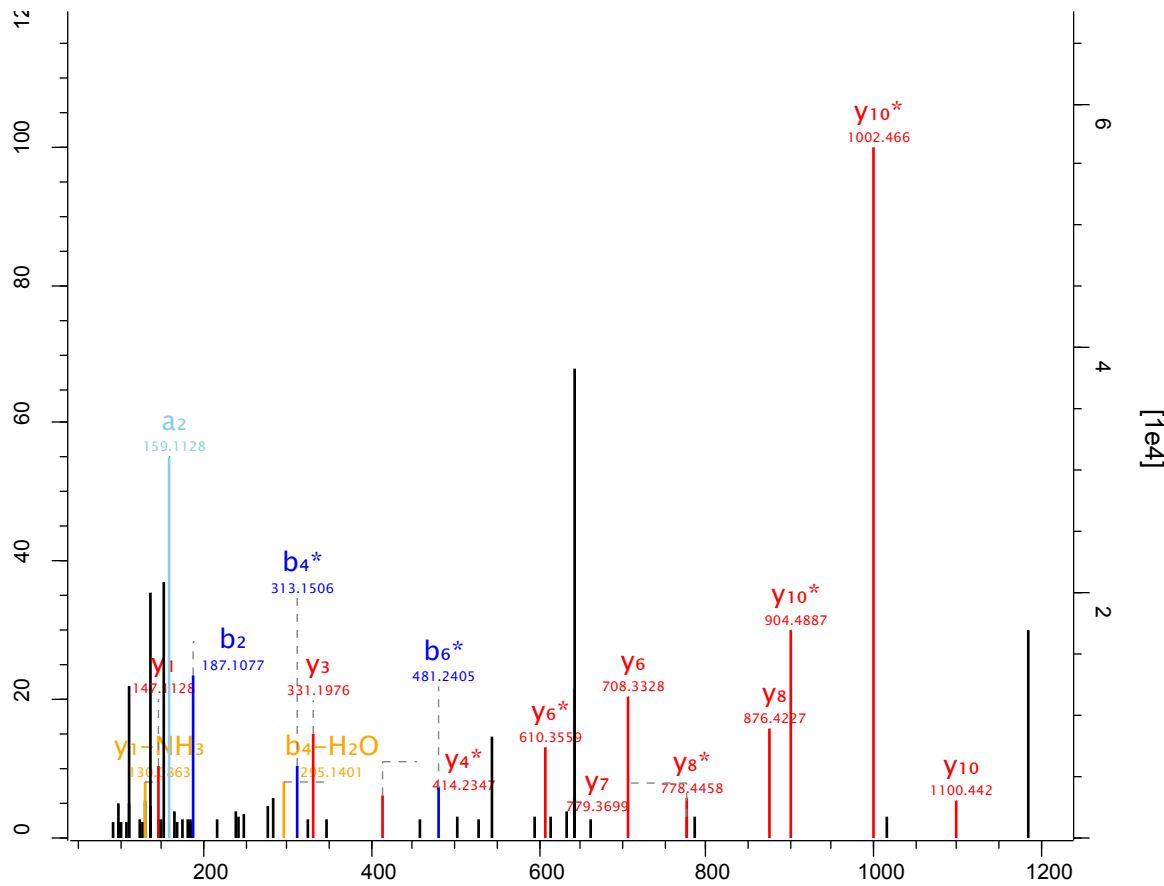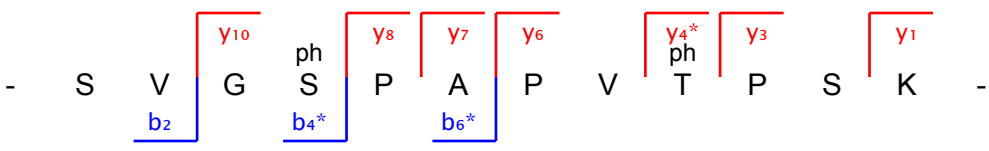

Raw file Scan Method Score m/z  
 Recip\_2\_34\_38 9031 FTMS; HCD 69.77 721.65

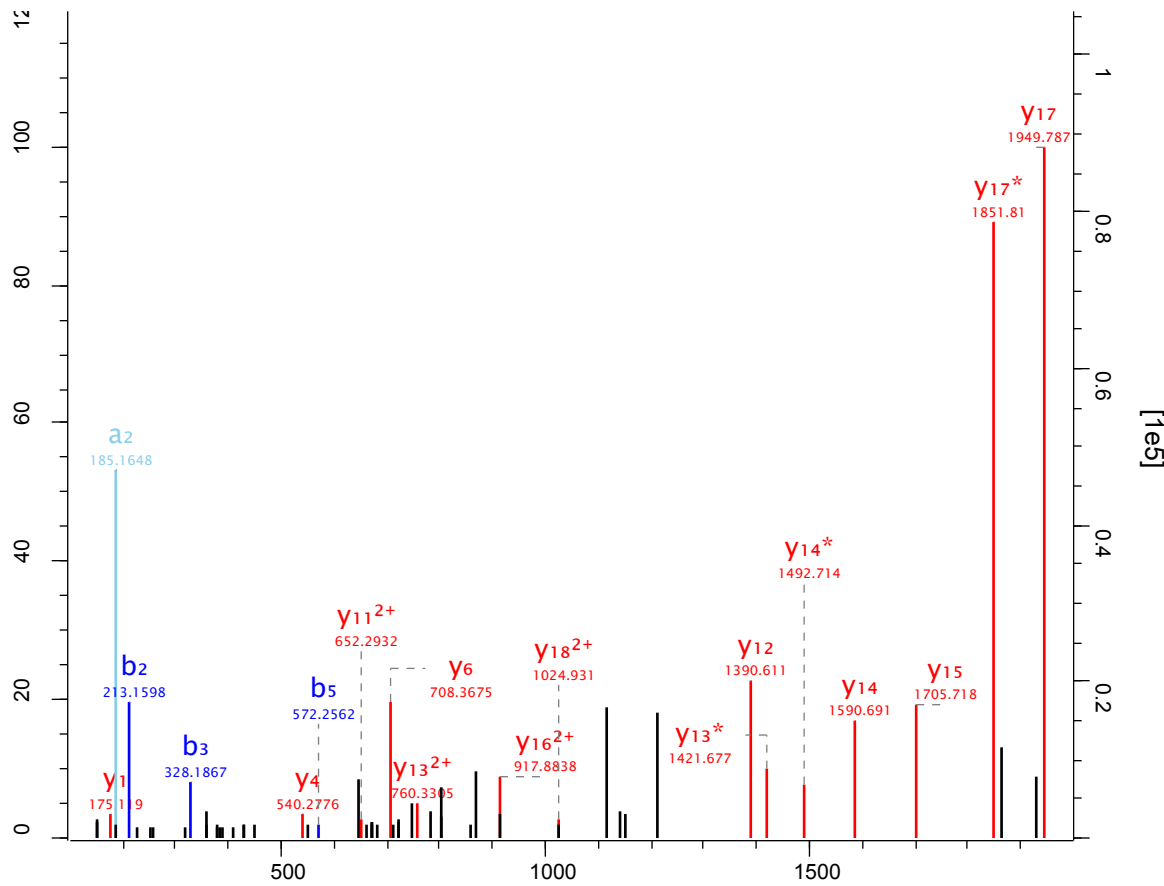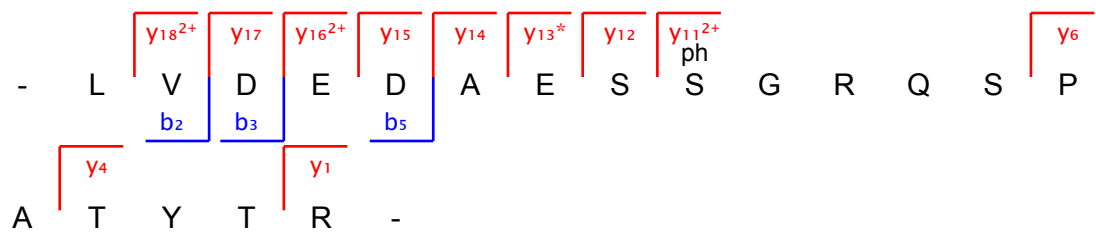

Raw file Scan Method Score m/z  
 Recip\_2\_34\_38 9132 FTMS; HCD 139.81 899.87

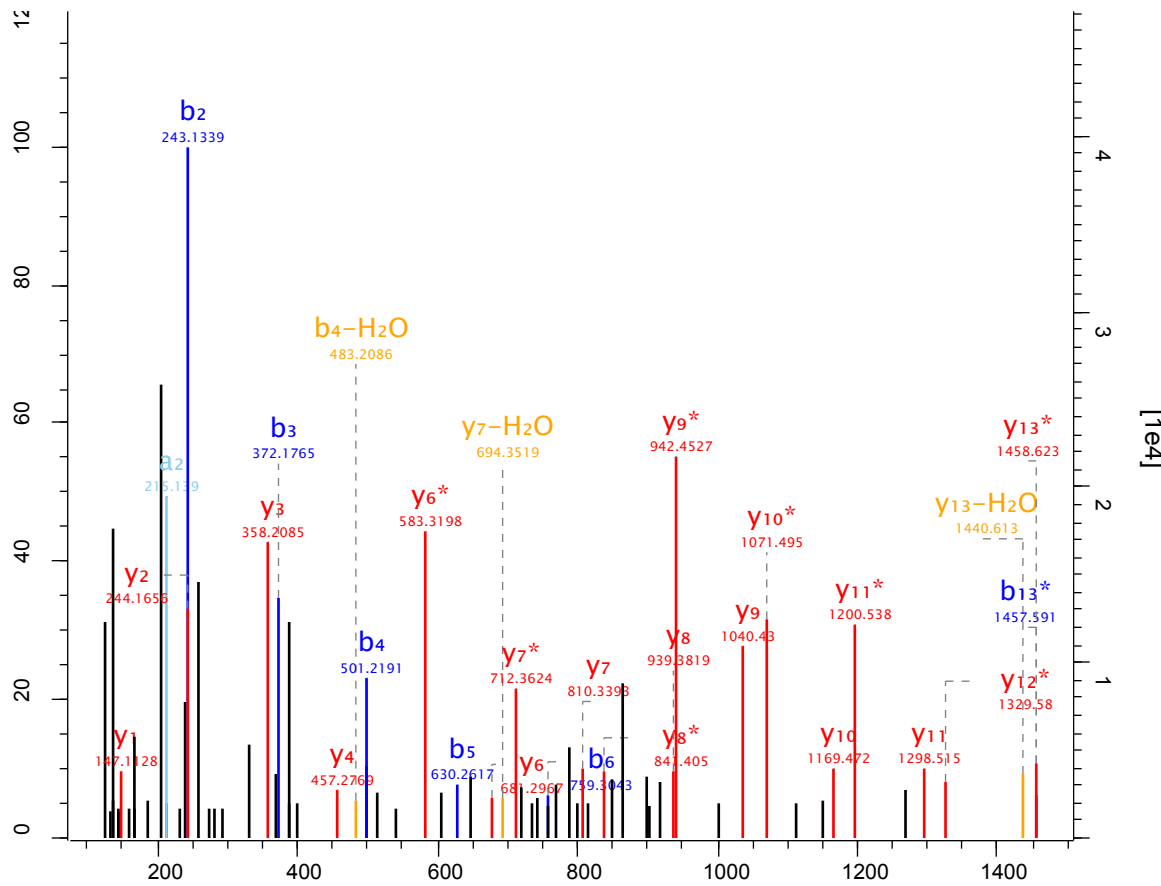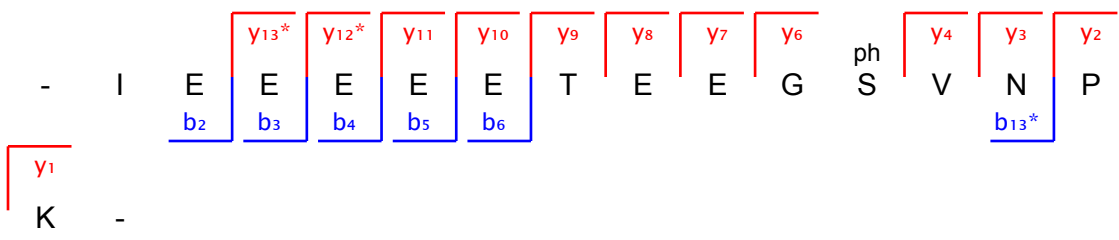



Raw file Scan Method Score m/z  
 Recip\_2\_34\_38 9332 FTMS; HCD 132.05 694.78

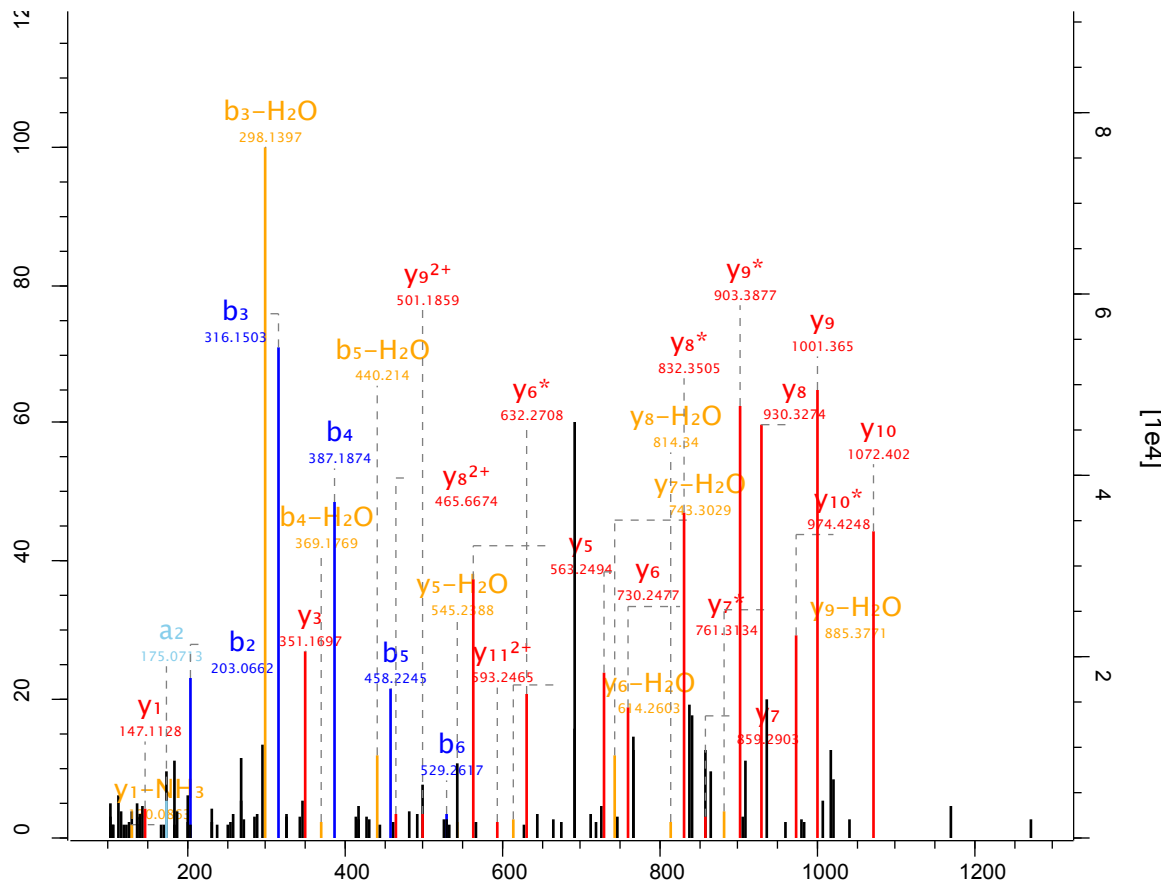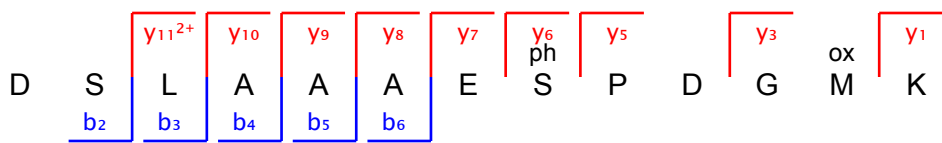

Raw file Scan Method Score m/z  
 Recip\_2\_34\_38 9405 FTMS; HCD 149.96 512.71

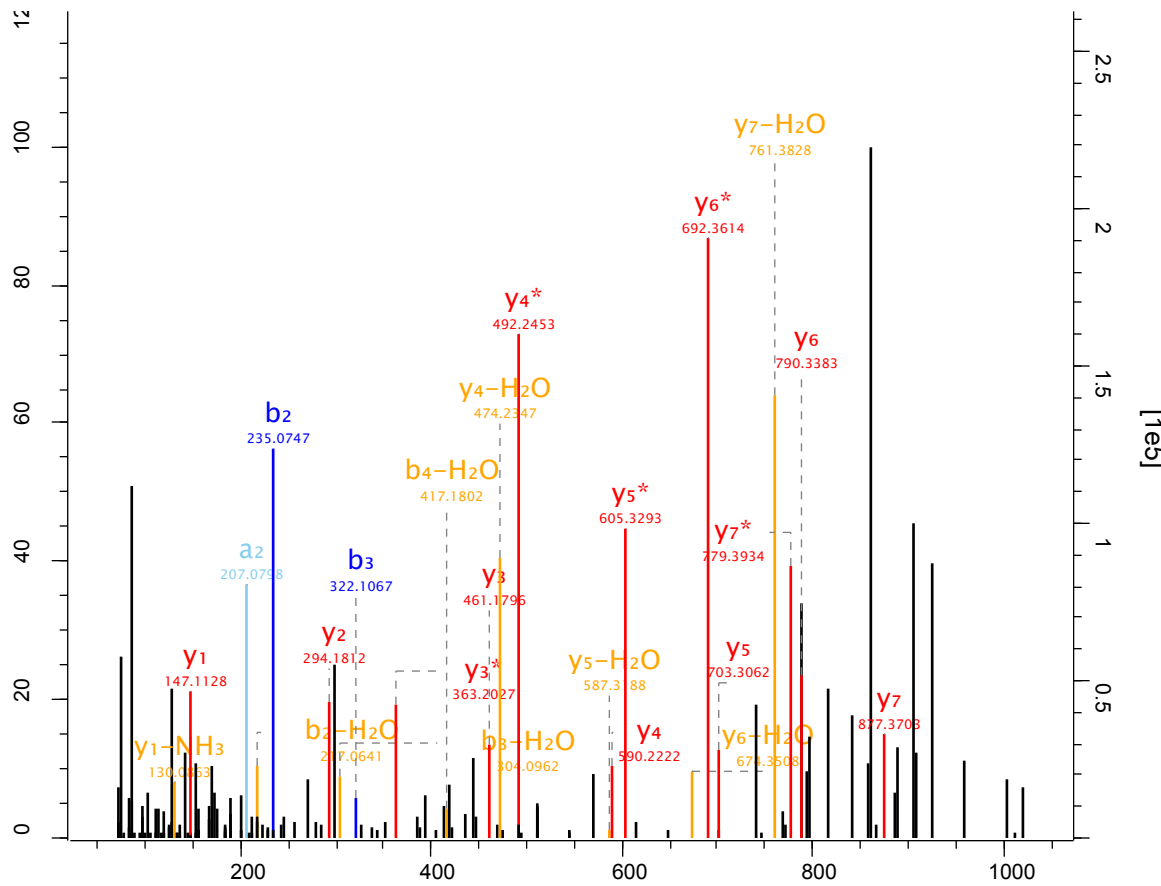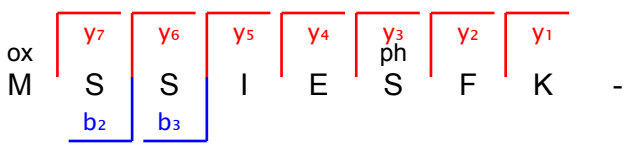

Raw file Scan Method Score m/z  
 Recip\_2\_34\_38 9480 FTMS; HCD 120.87 564.73

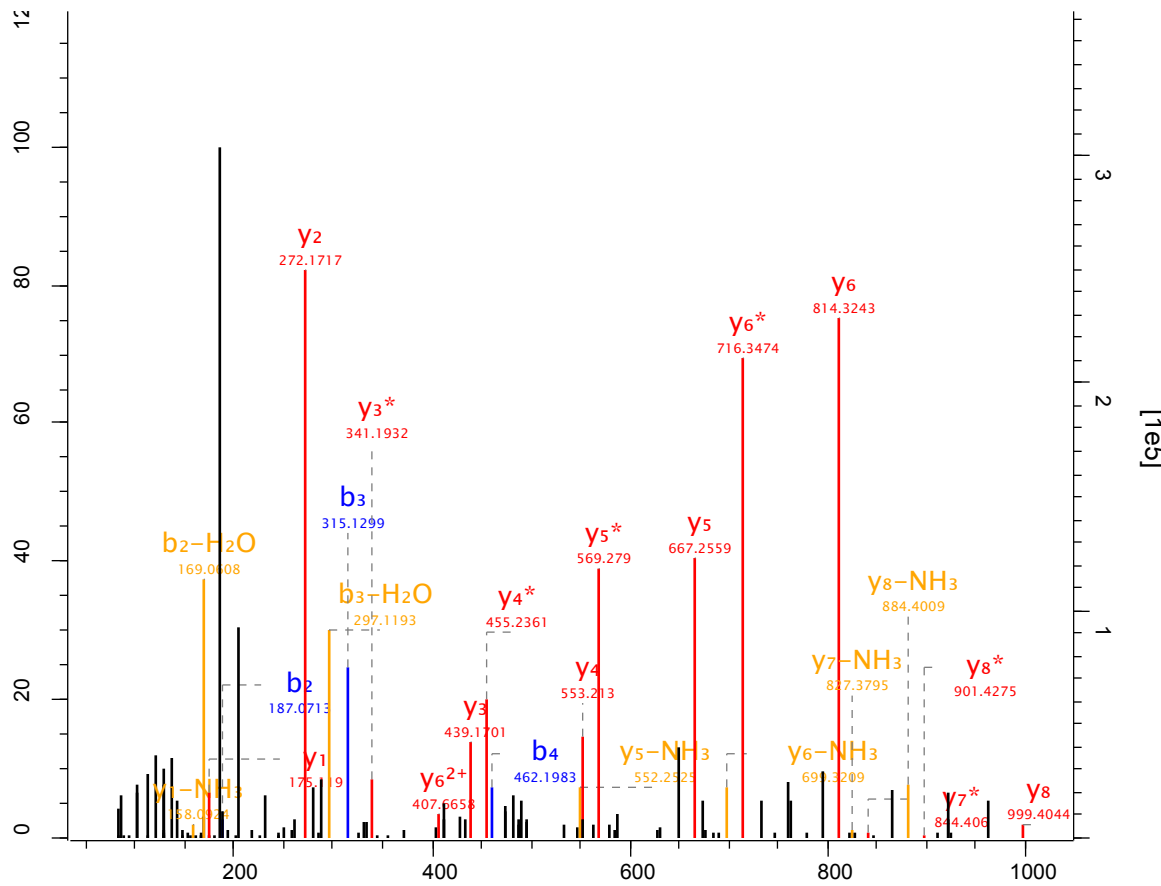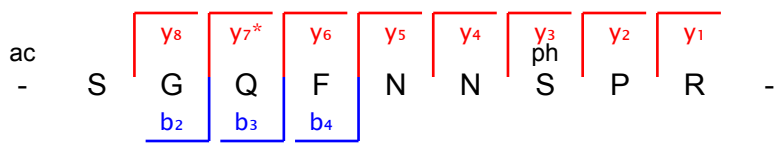

| Raw file      | Scan | Method    | Score | m/z    |
|---------------|------|-----------|-------|--------|
| Recip_2_34_38 | 9487 | FTMS; HCD | 73.83 | 724.28 |

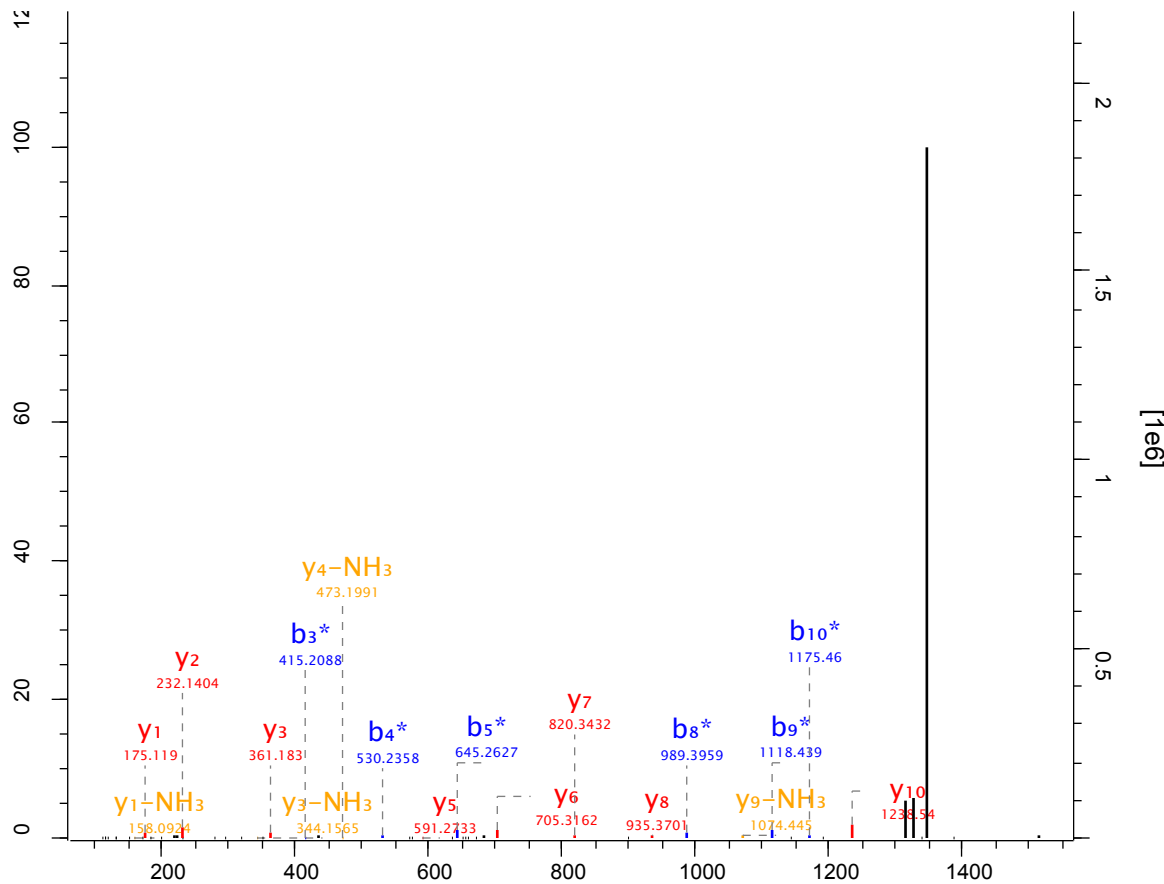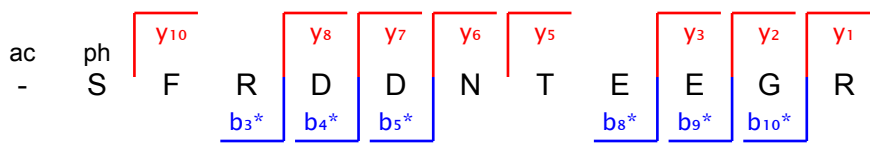

| Raw file      | Scan | Method    | Score  | m/z    |
|---------------|------|-----------|--------|--------|
| Recip_2_34_38 | 9488 | FTMS; HCD | 112.17 | 701.31 |

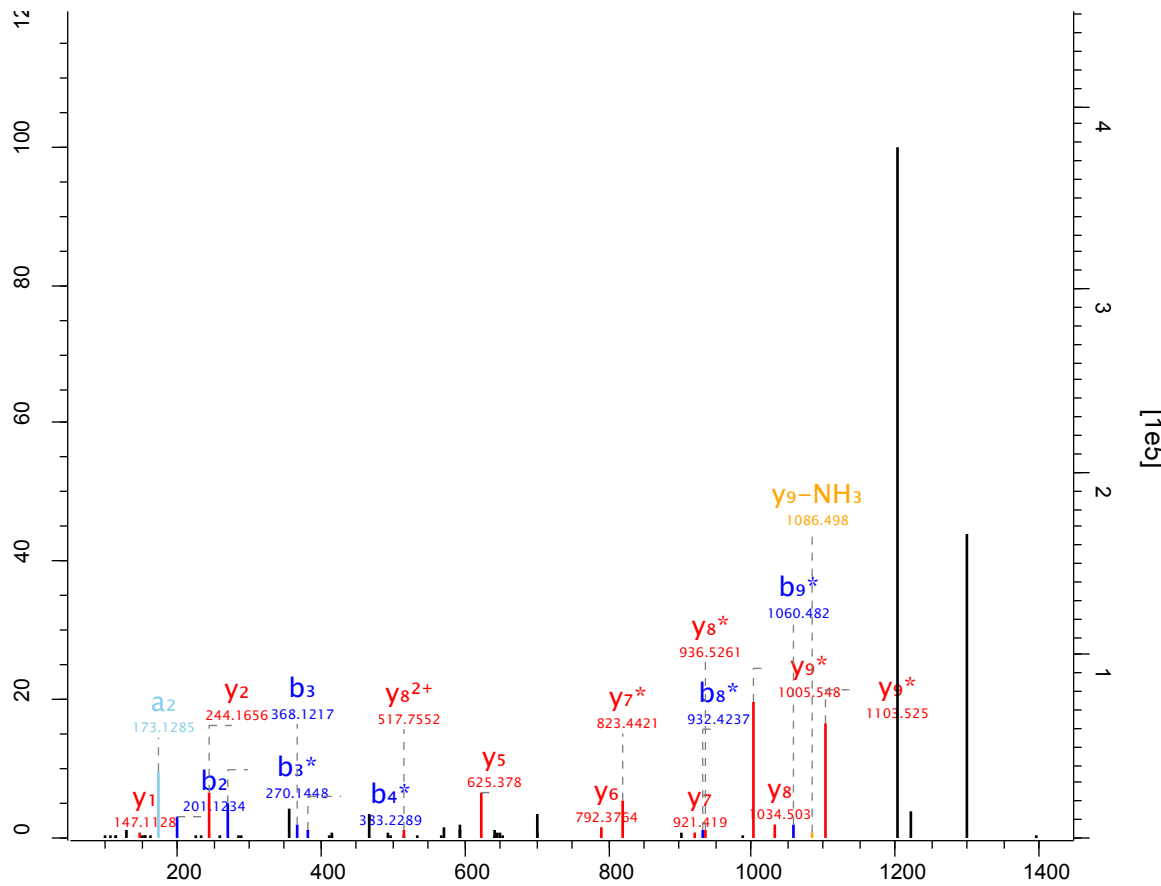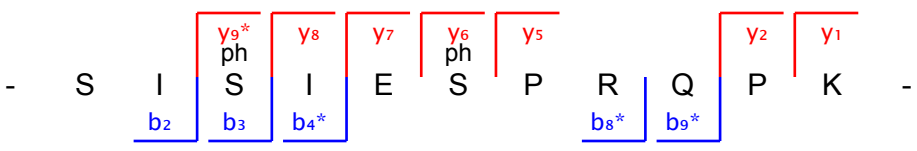

Raw file Scan Method m/z  
 Recip\_2\_34\_38 9628 FTMS; HCD 128.7 570.59

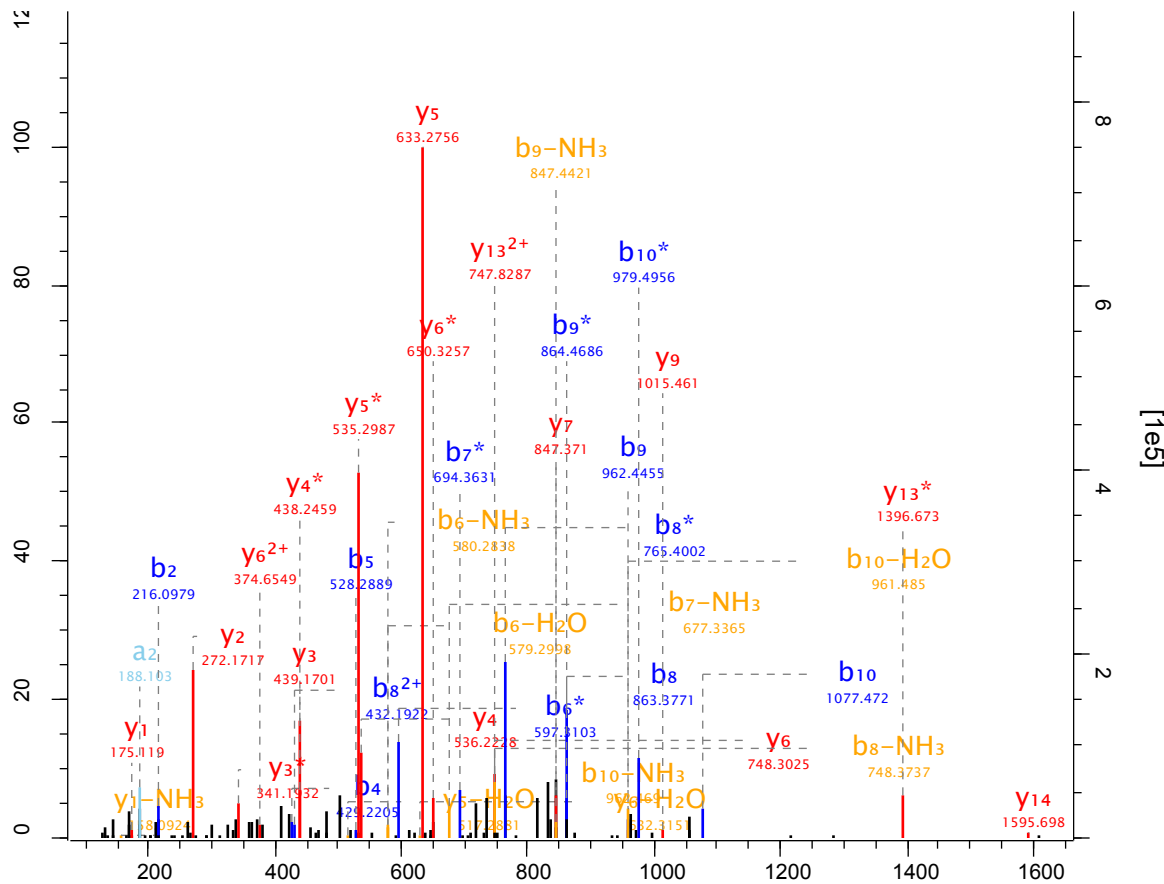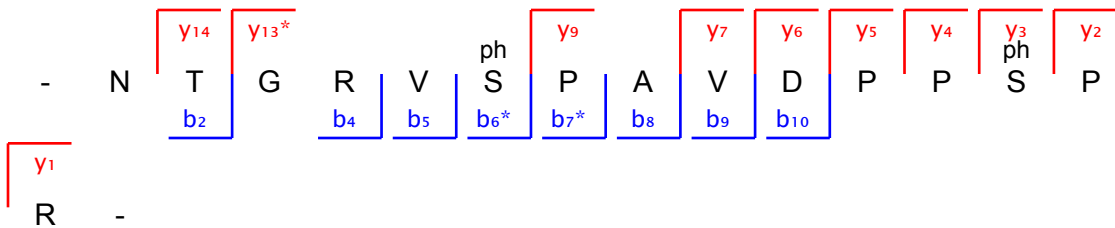

Raw file Scan Method Score m/z  
 Recip\_2\_38\_45 10077 FTMS; HCD 92.38 732.8

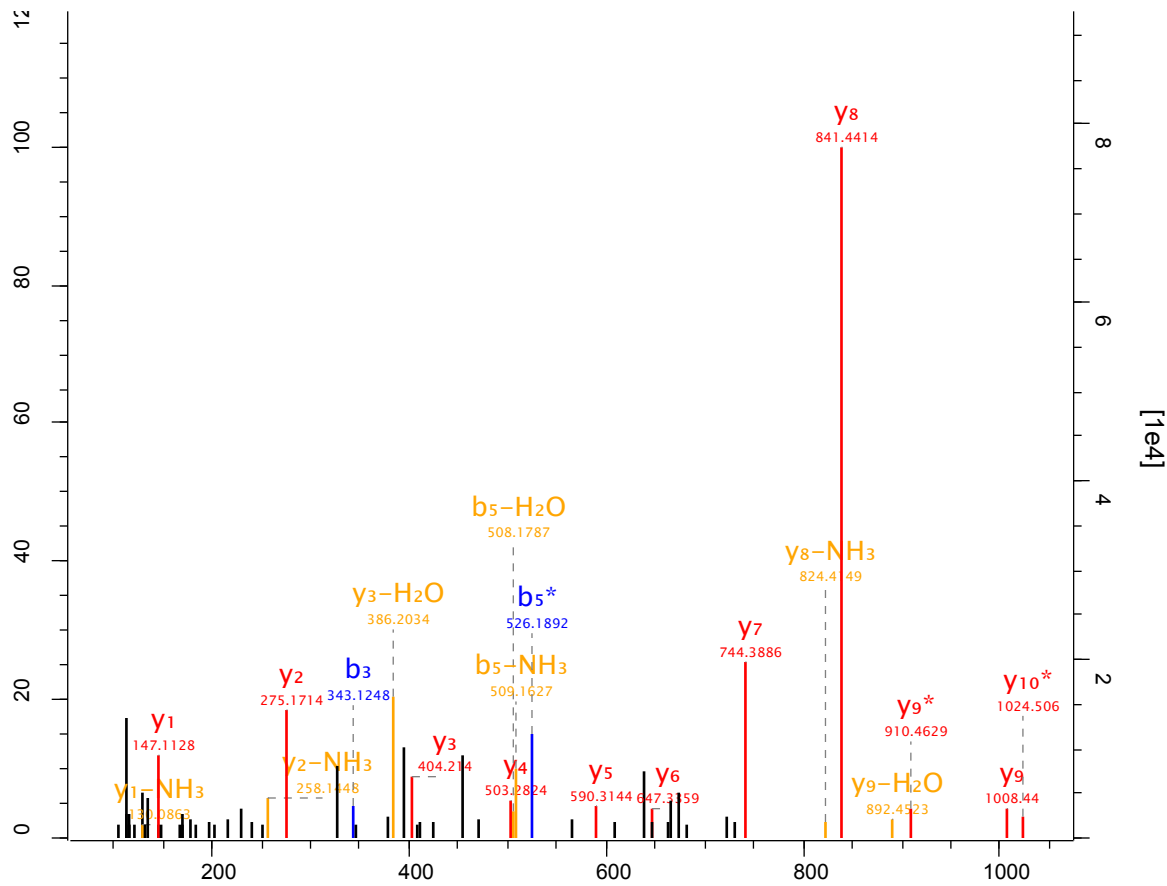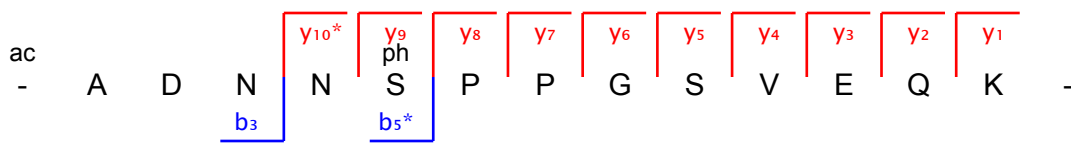

Raw file Scan Method Score m/z  
 Recip\_2\_38\_45 1071 FTMS; HCD 47.09 626.75

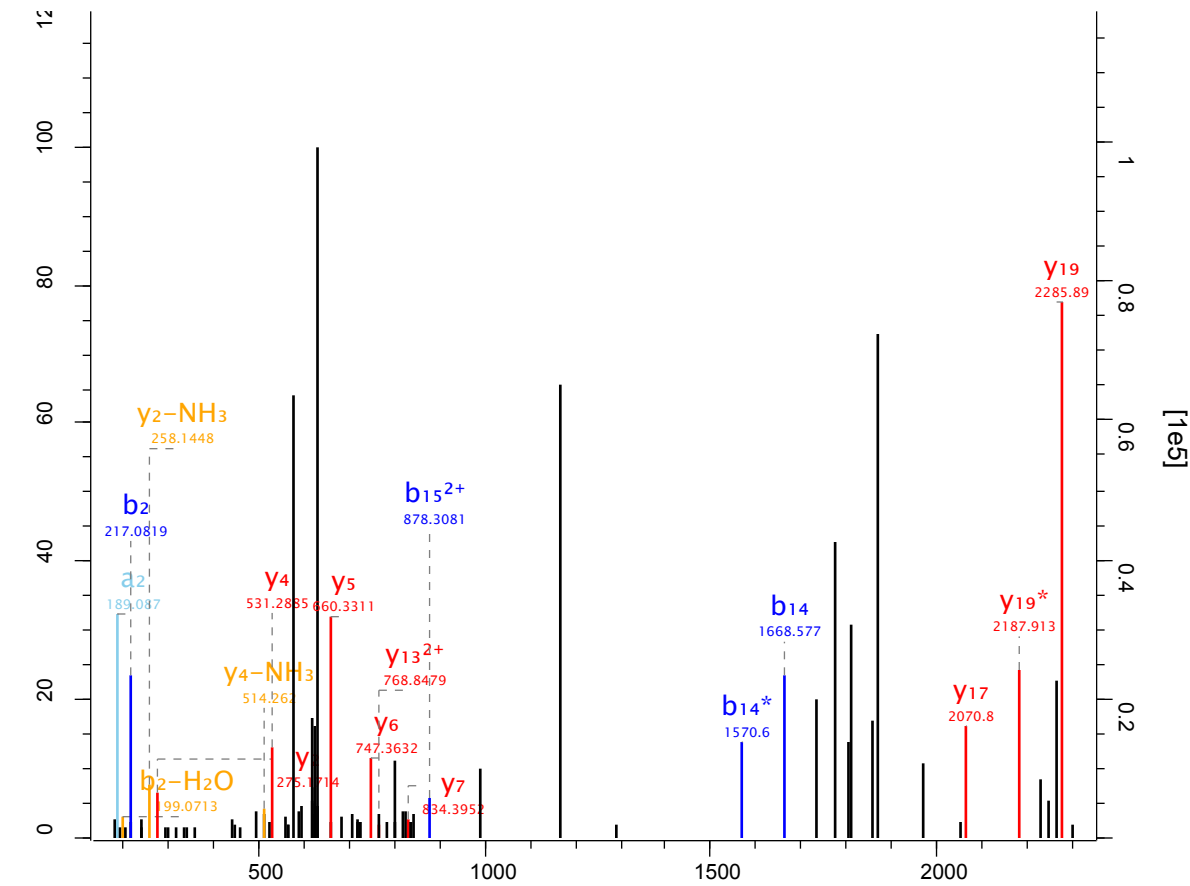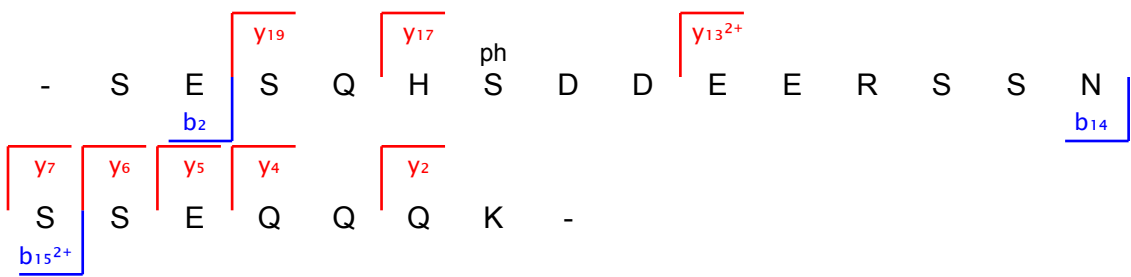





| Raw file      | Scan  | Method    | Score | m/z    |
|---------------|-------|-----------|-------|--------|
| Recip_2_38_45 | 11250 | FTMS; HCD | 46.38 | 543.26 |

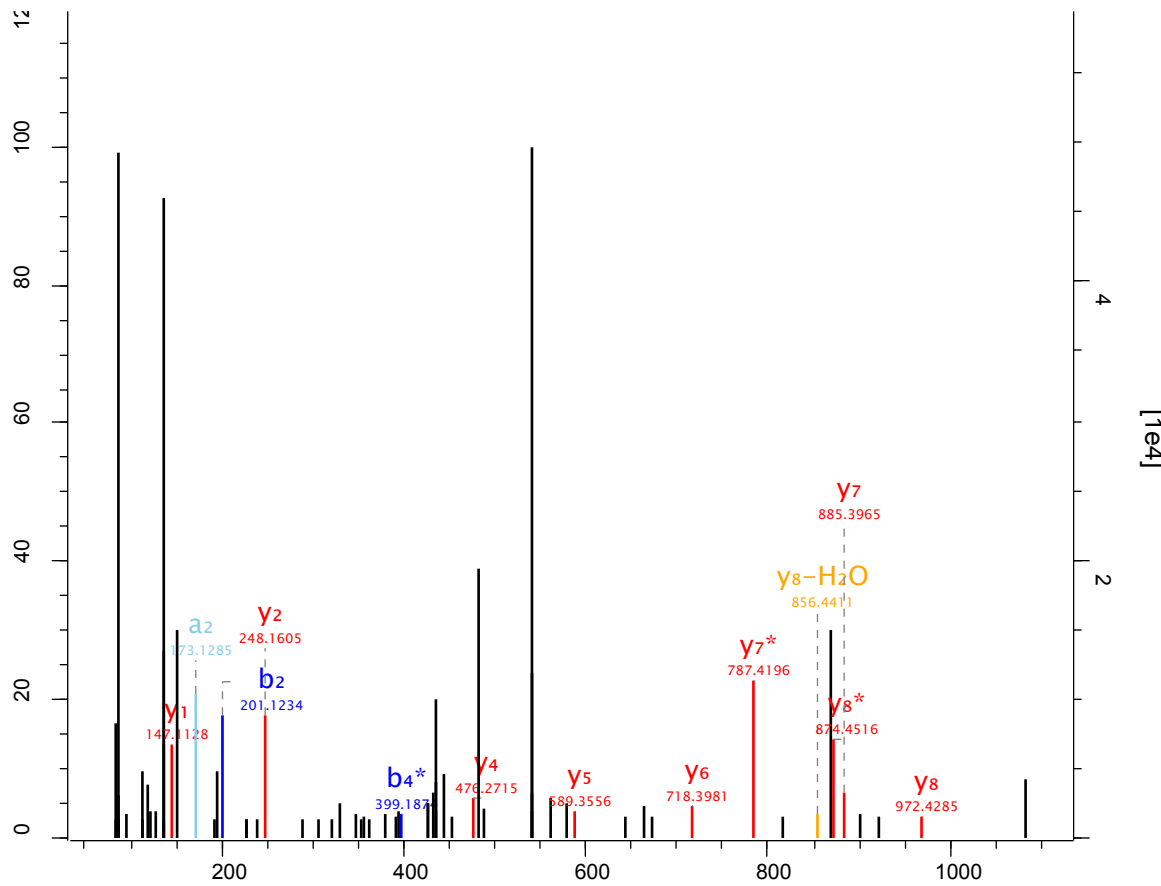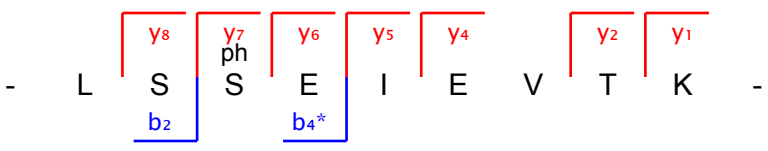

Raw file Scan Method Score m/z  
 Recip\_2\_38\_45 11660 FTMS; HCD 80.96 675.23

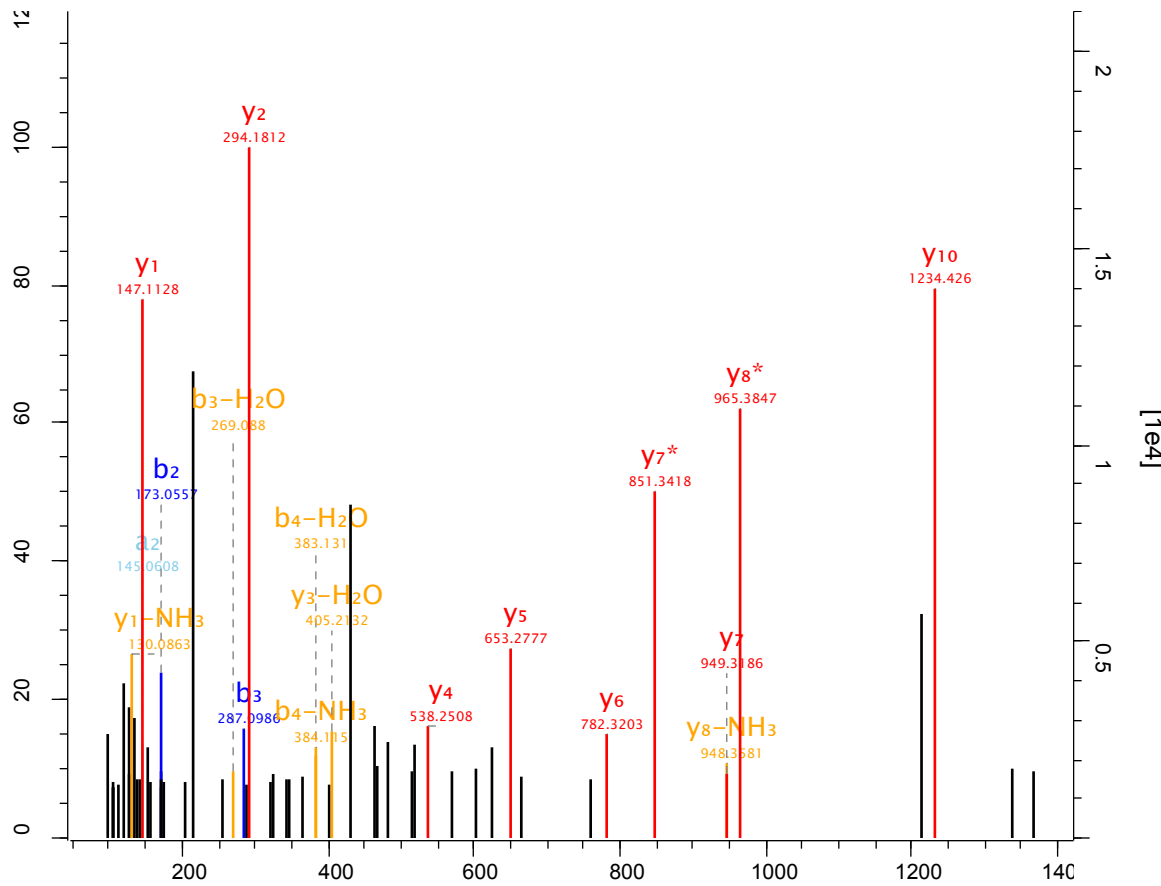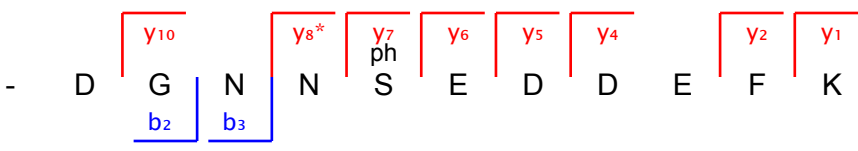

Raw file Scan Method Score m/z  
 Recip\_2\_38\_45 12046 FTMS; HCD 43.03 570.94

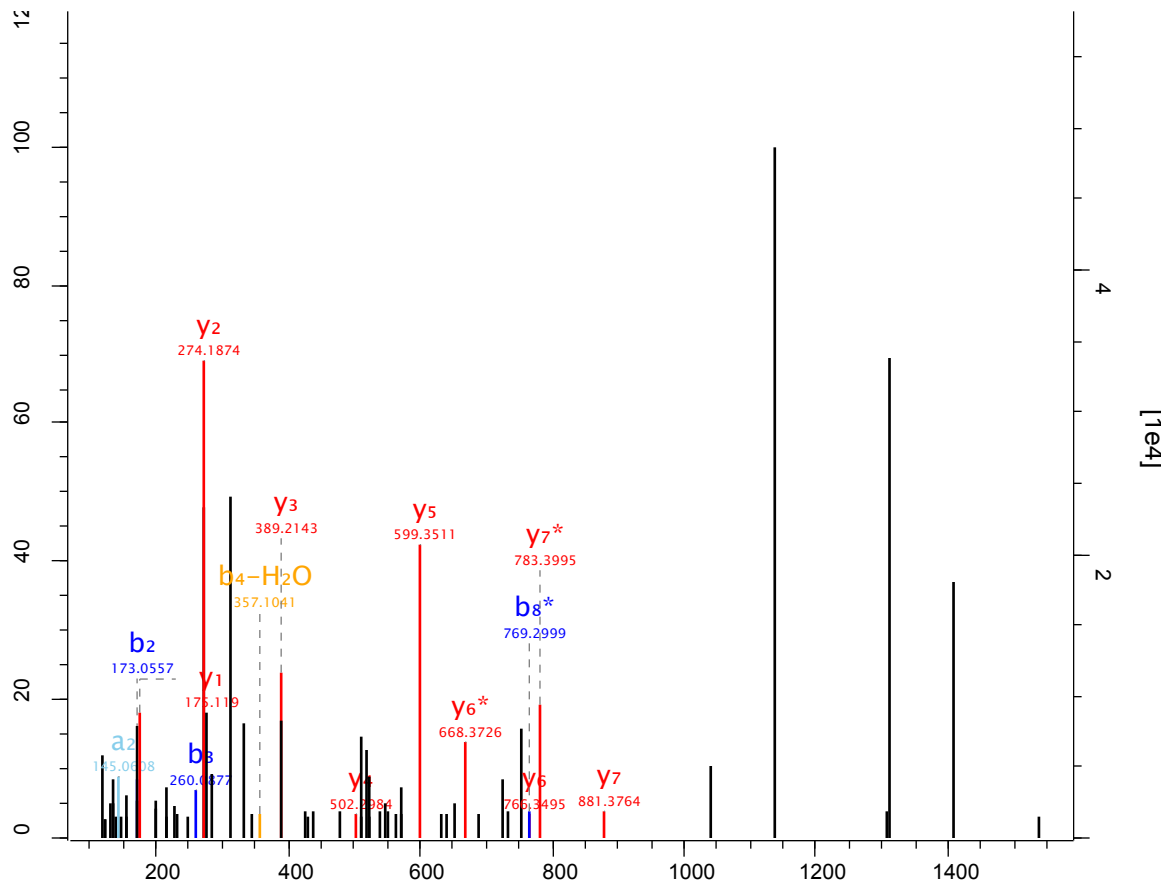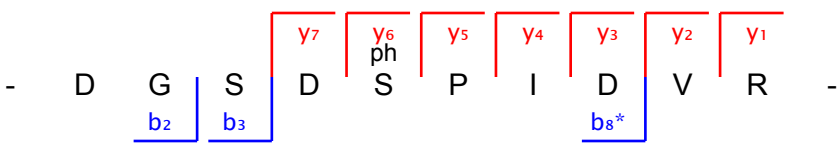

Raw file Scan Method Score m/z  
 Recip\_2\_38\_45 13212 FTMS; HCD 46.25 853.87

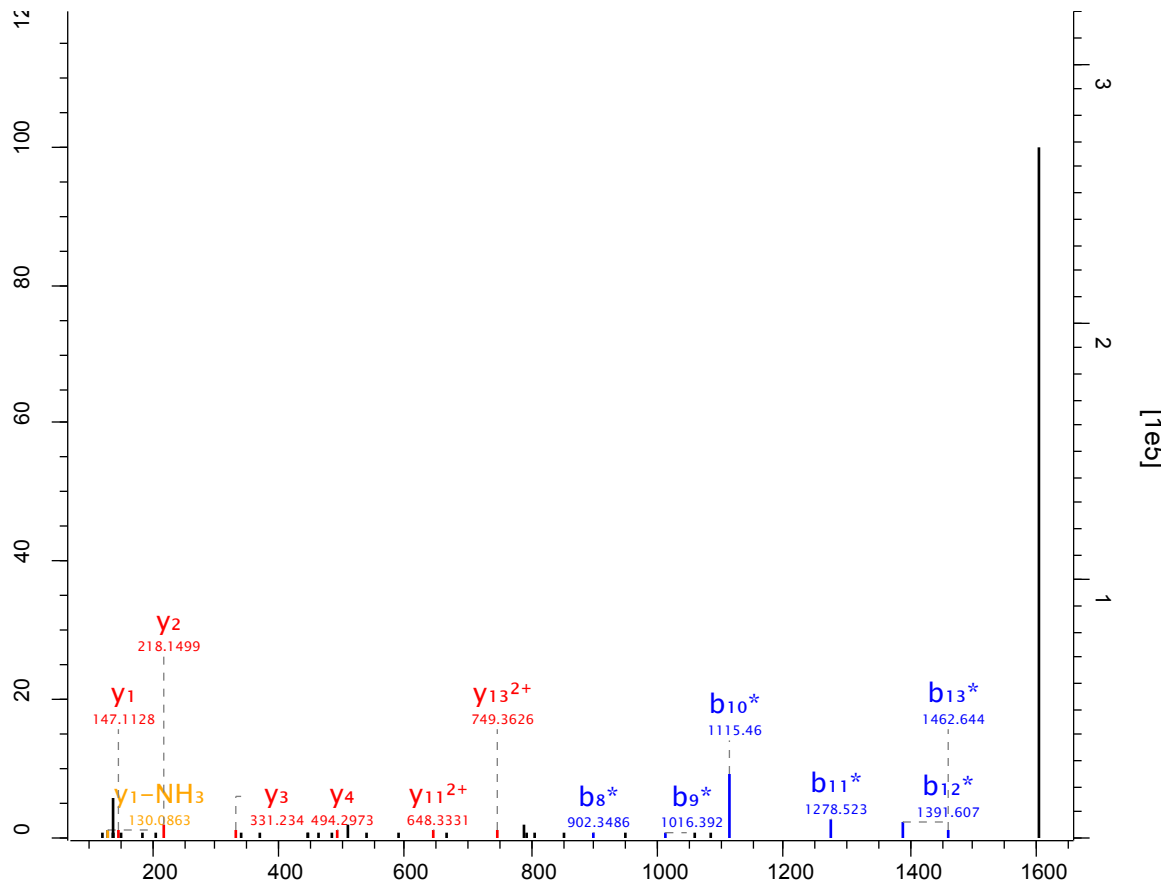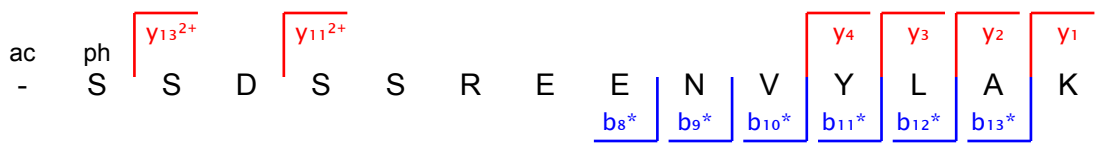

| Raw file      | Scan | Method    | Score | m/z    |
|---------------|------|-----------|-------|--------|
| Recip_2_38_45 | 1332 | FTMS; HCD | 43.76 | 409.19 |

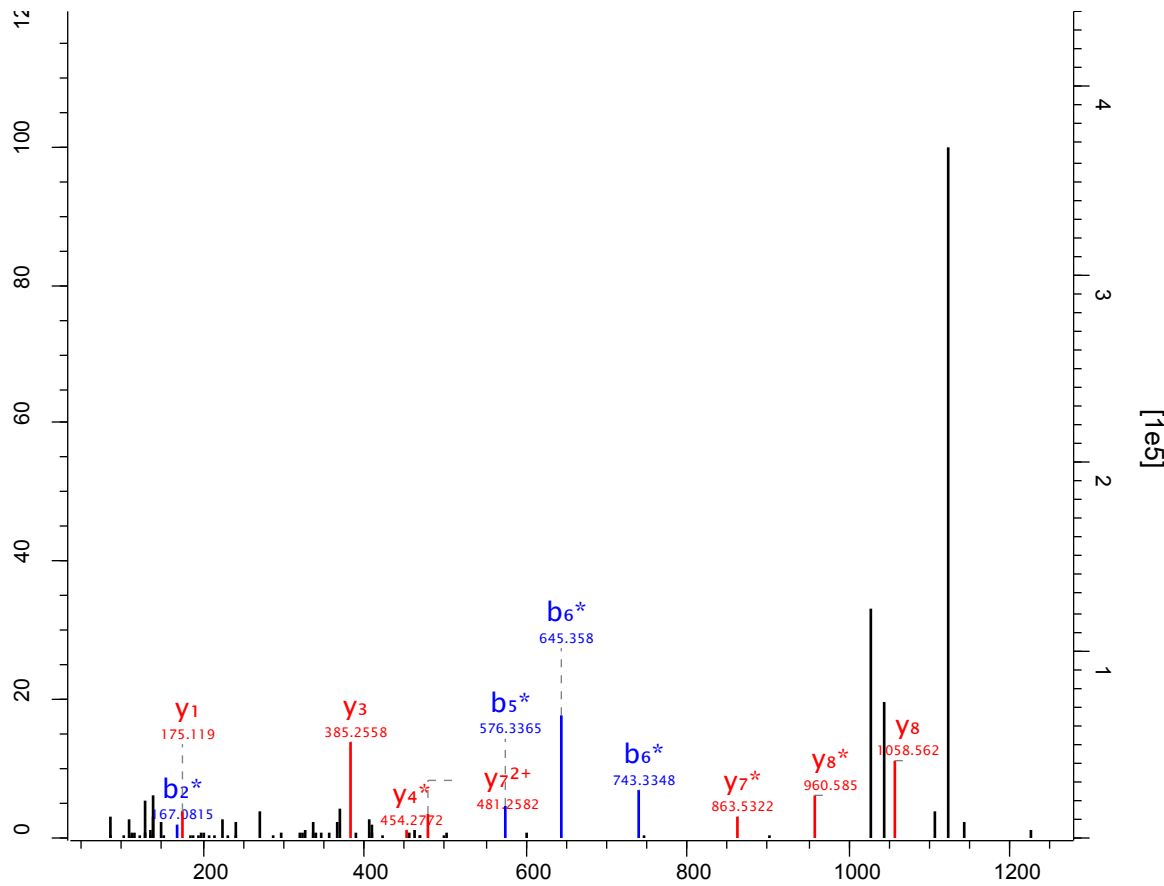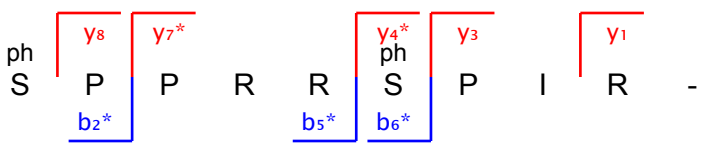

Raw file Scan Method Score m/z  
 Recip\_2\_38\_45 13368 FTMS; HCD 186.74 626.62

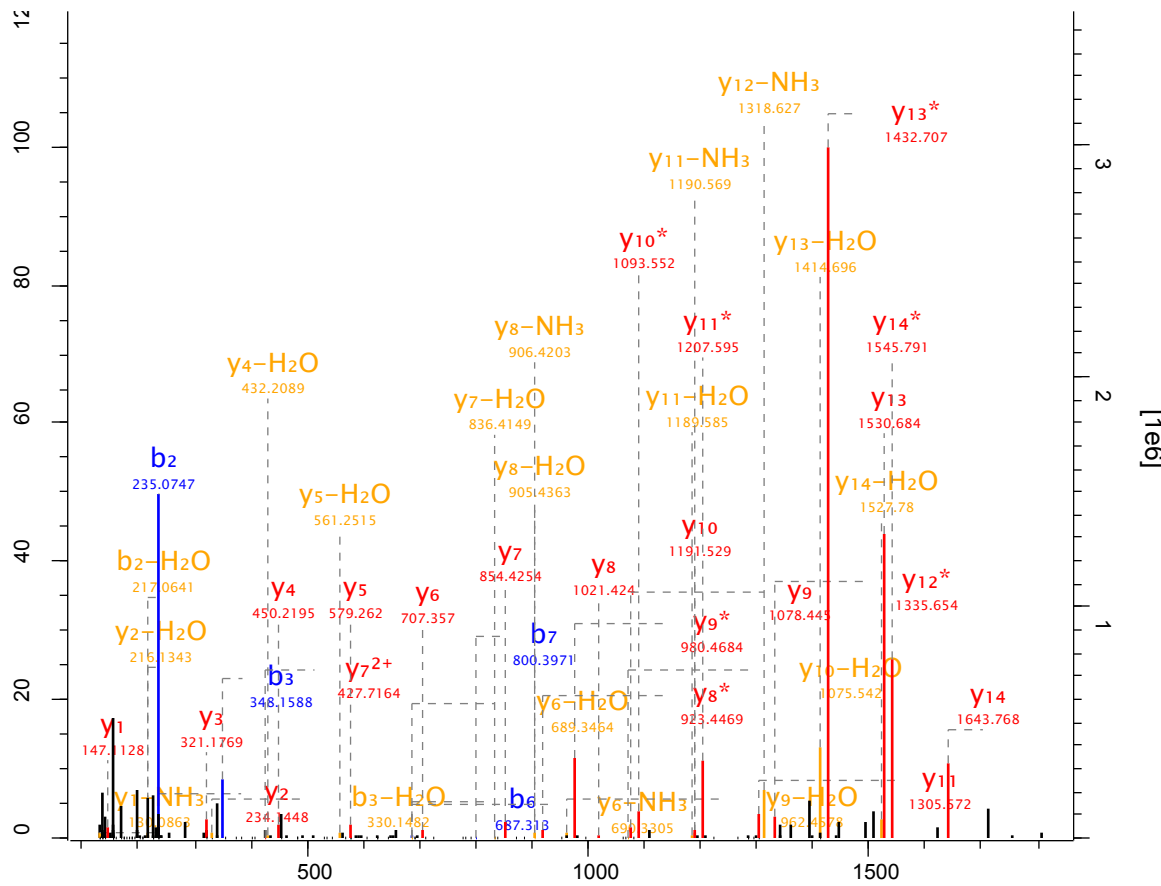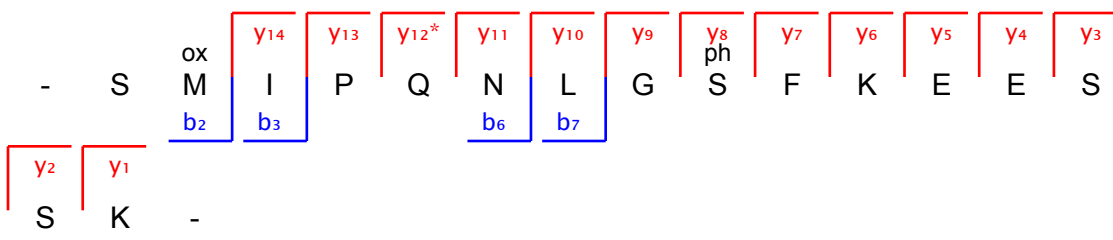

Raw file Scan Method Score m/z  
 Recip\_2\_38\_45 13931 FTMS; HCD 53.62 939.38

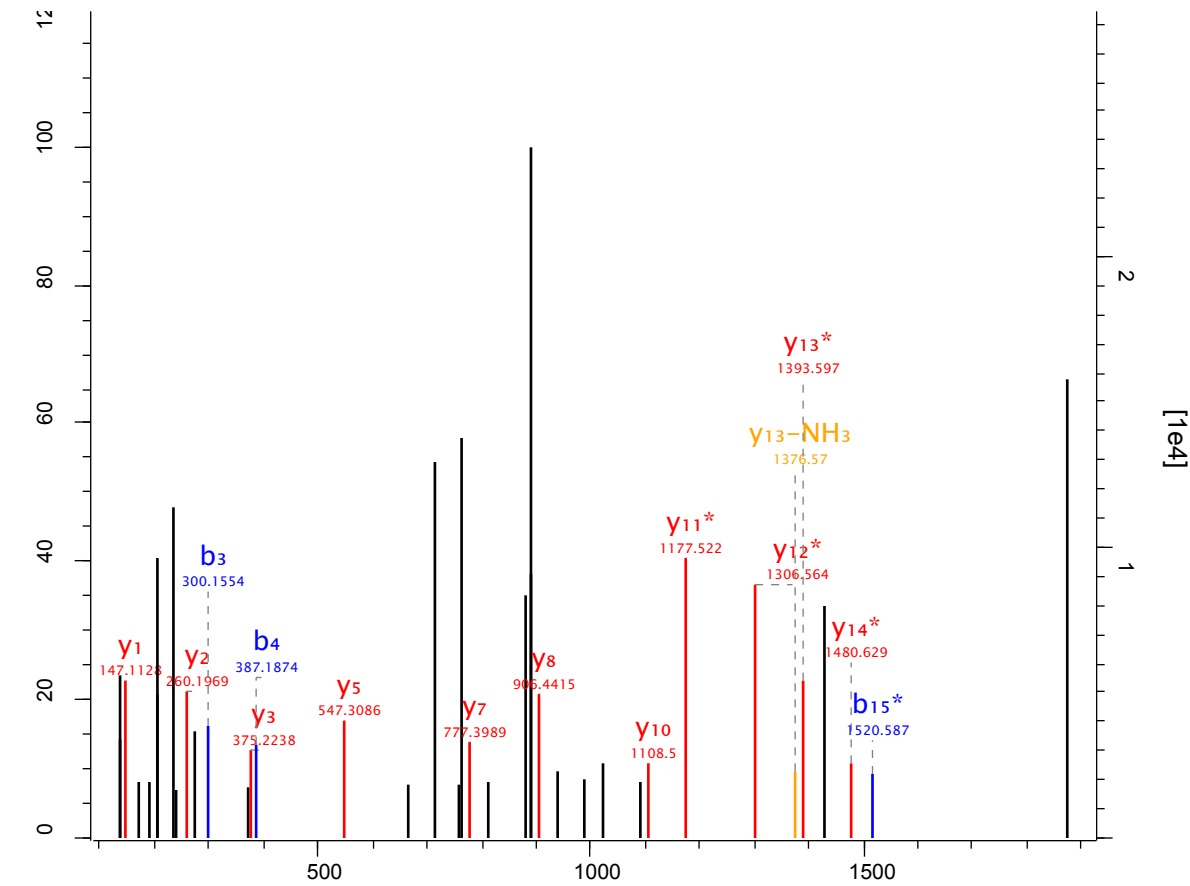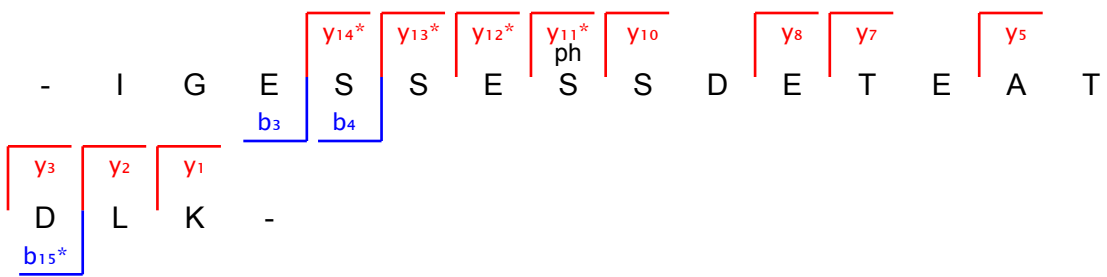



| Raw file      | Scan  | Method    | Score | m/z    |
|---------------|-------|-----------|-------|--------|
| Recip_2_38_45 | 14258 | FTMS; HCD | 60.2  | 628.79 |

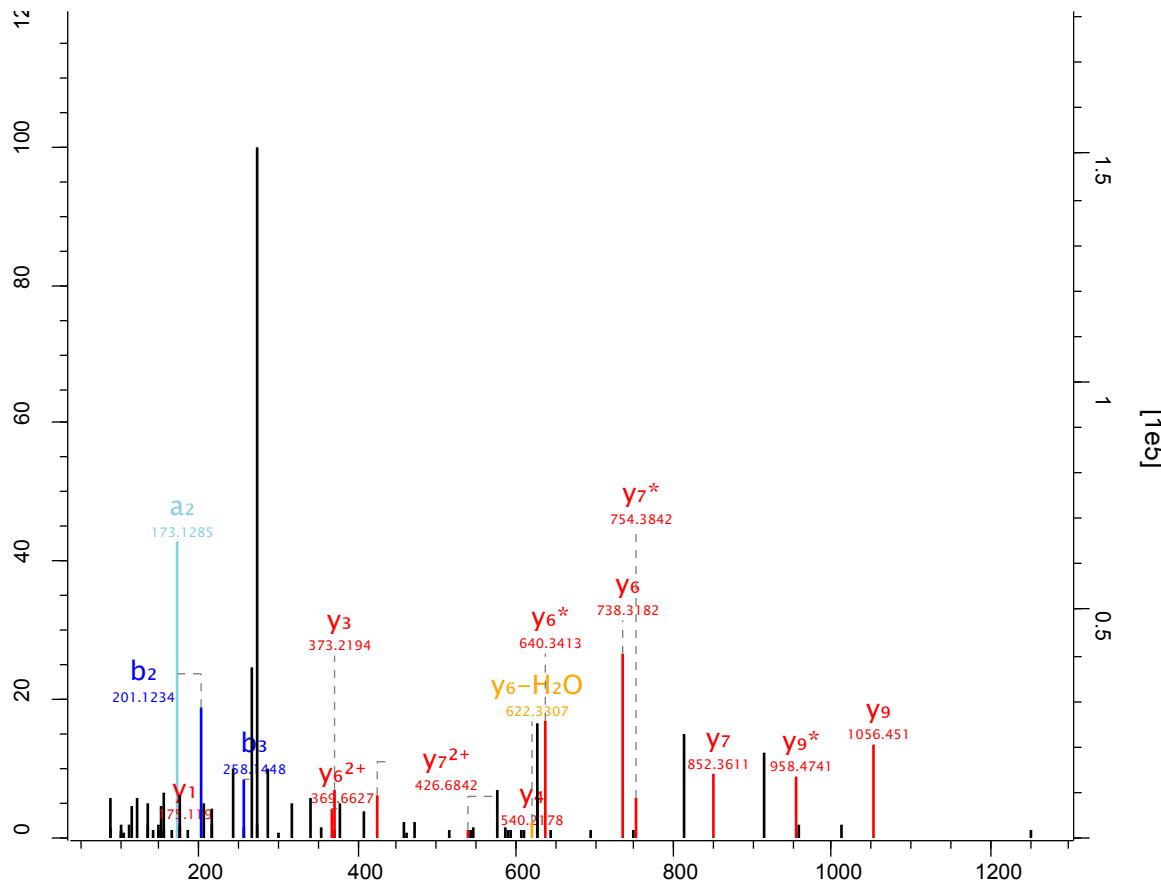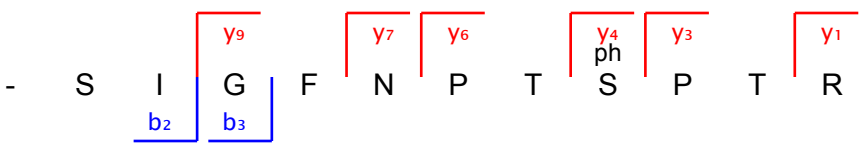

Raw file Scan Method Score m/z  
 Recip\_2\_38\_45 14388 FTMS; HCD 94.38 1065.95

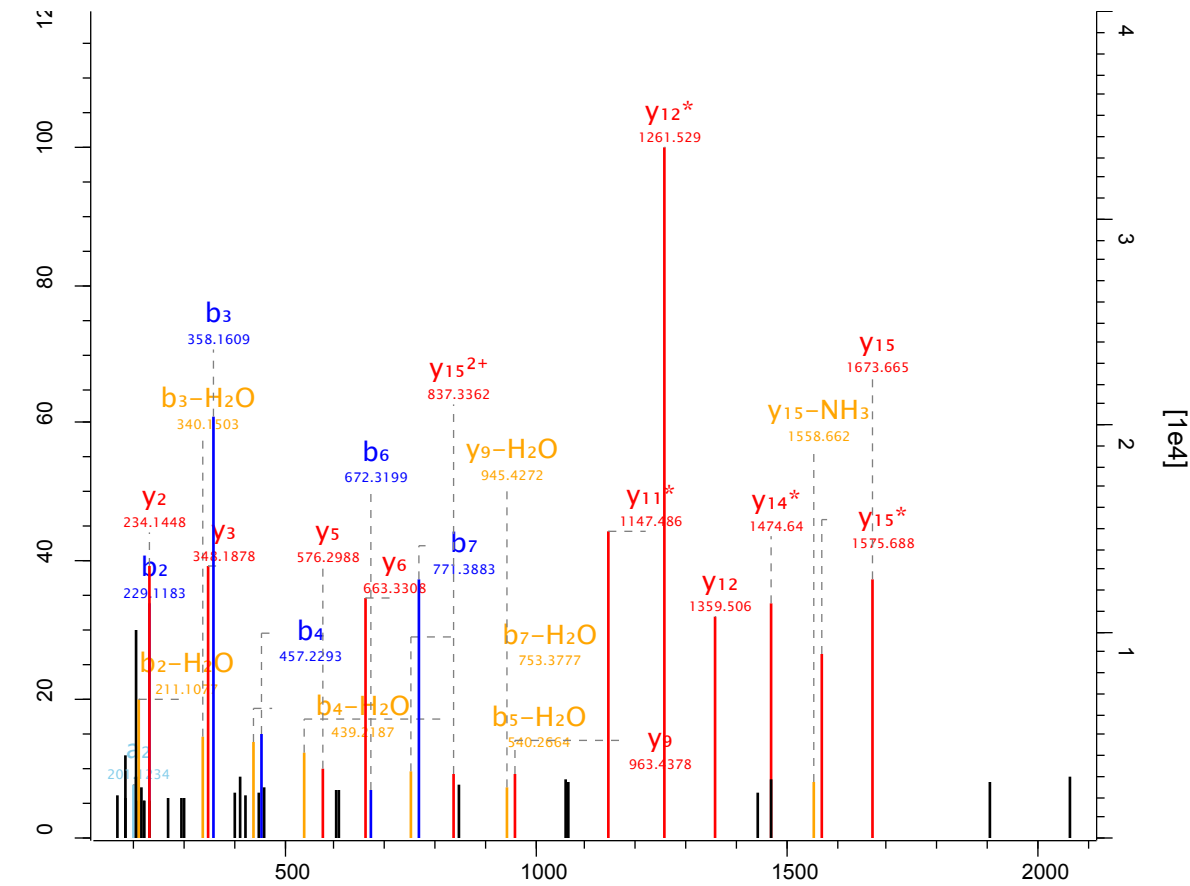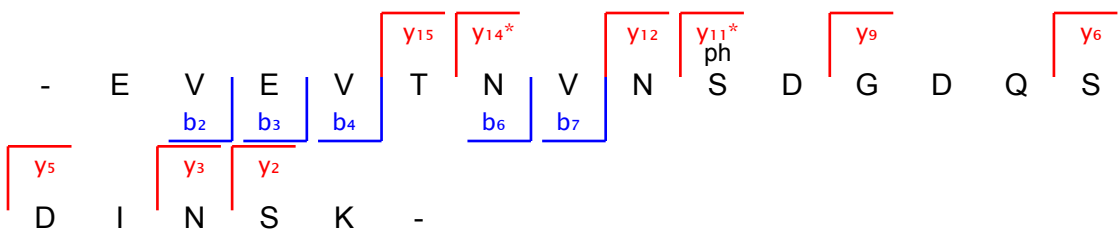

Raw file Scan Method Score m/z  
 Recip\_2\_38\_45 14519 FTMS; HCD 179.86 860.01

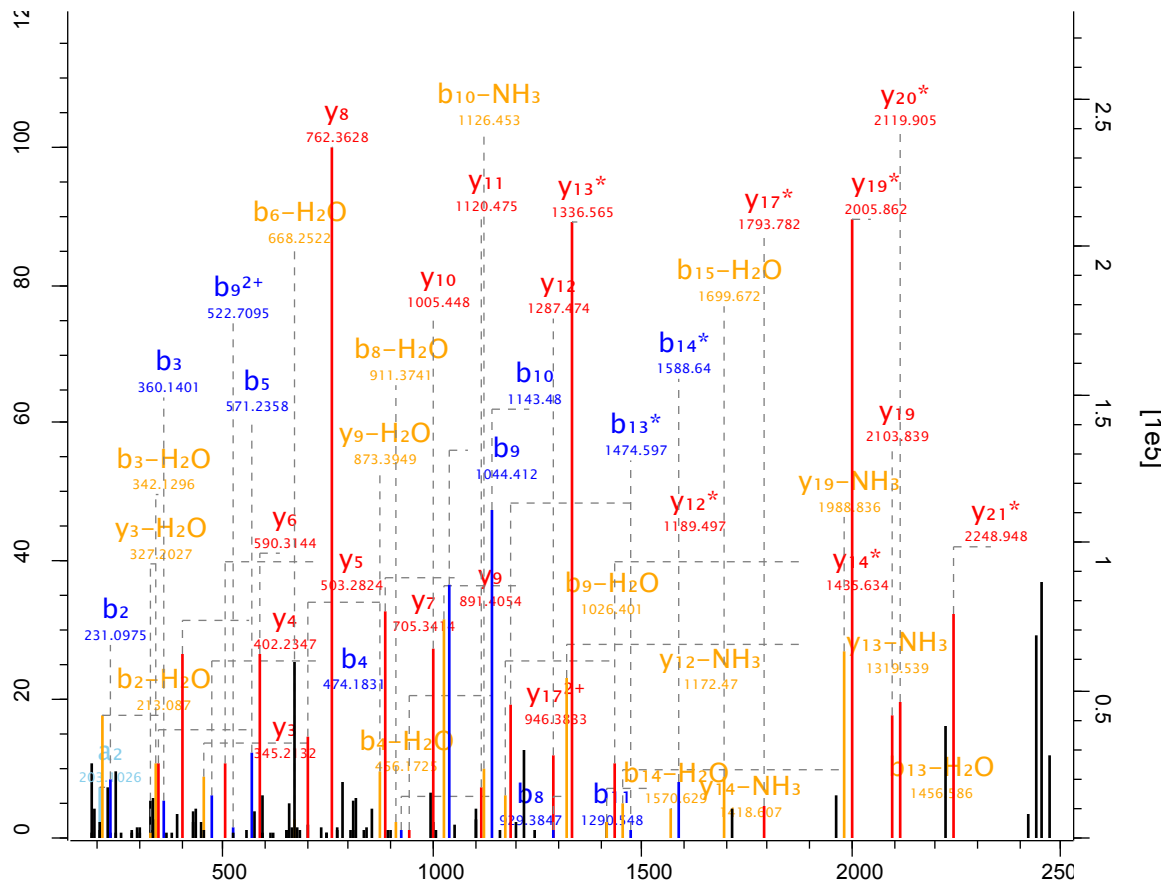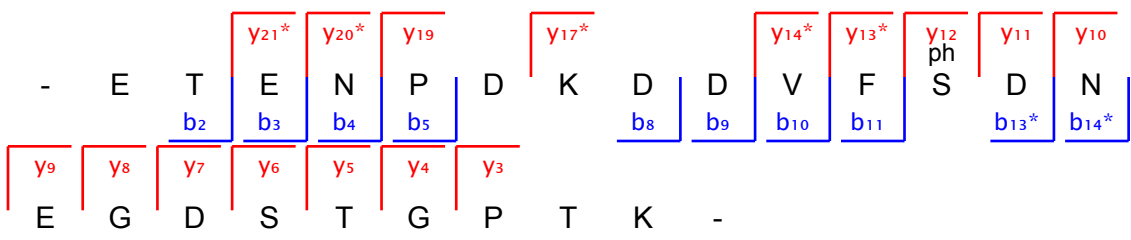

Raw file Scan Method Score m/z  
 Recip\_2\_38\_45 15078 FTMS; HCD 86.95 787.07

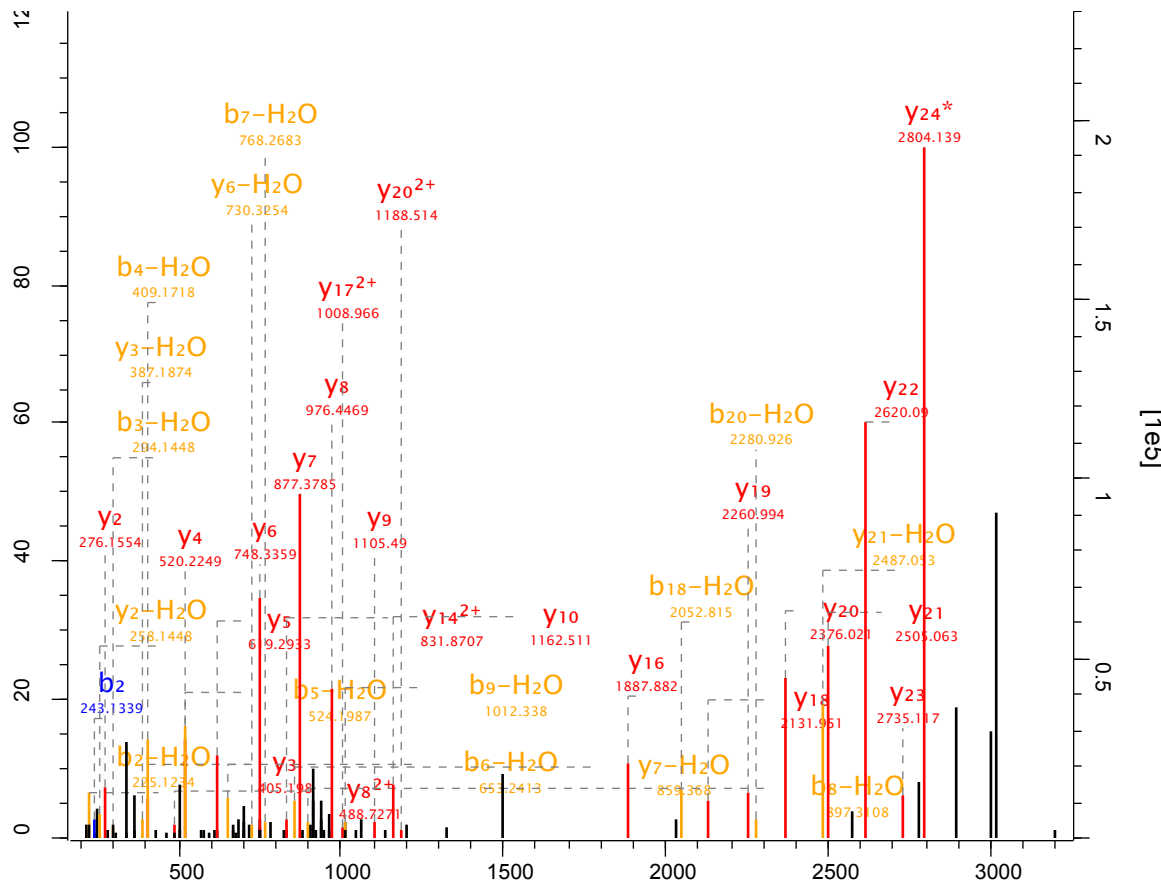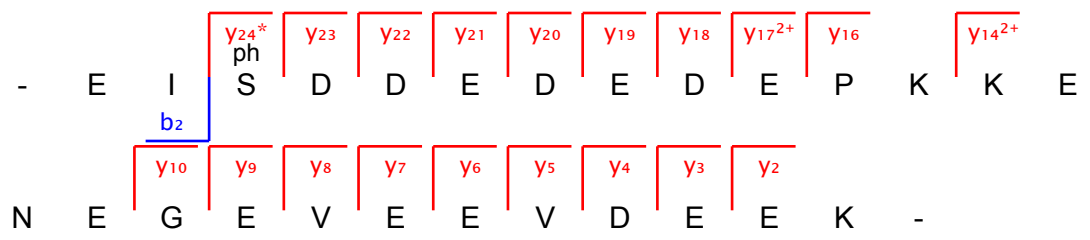

Raw file Scan Method Score m/z  
 Recip\_2\_38\_45 15831 FTMS; HCD 88.71 655.3

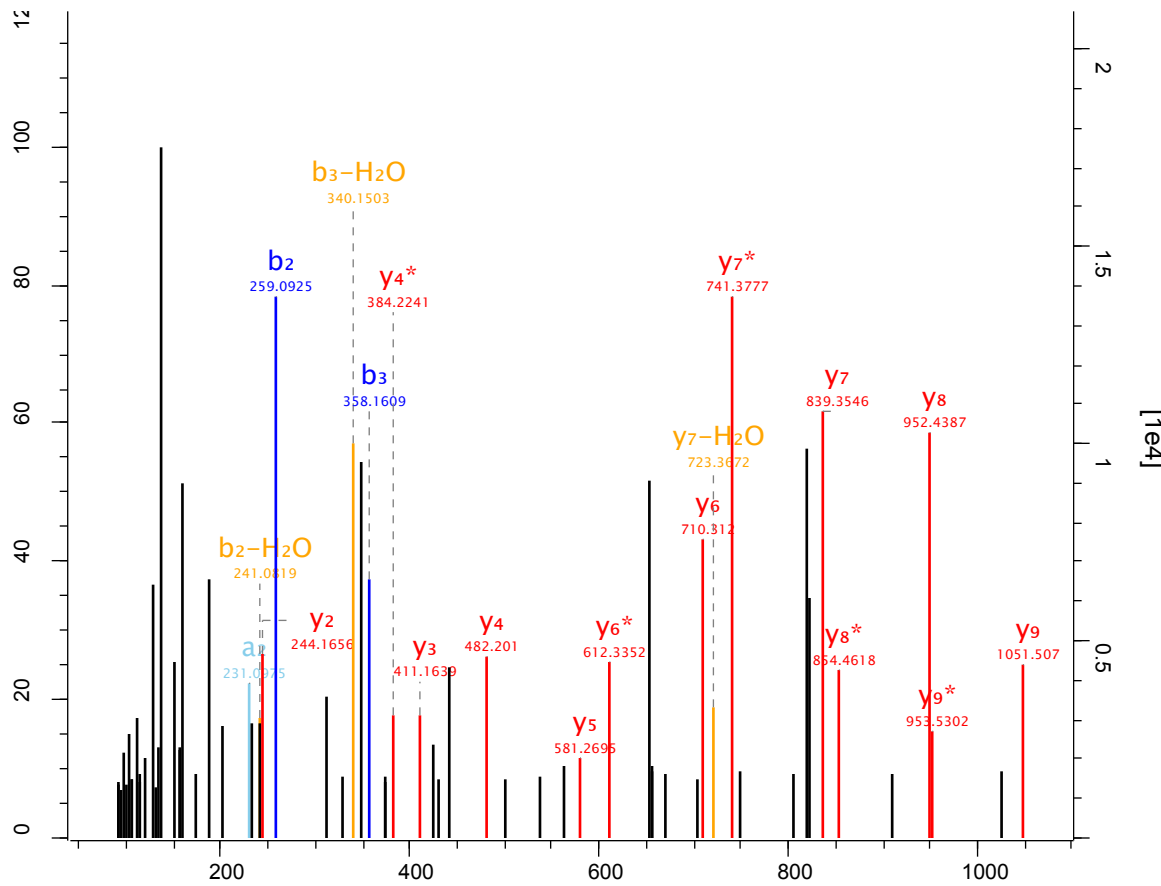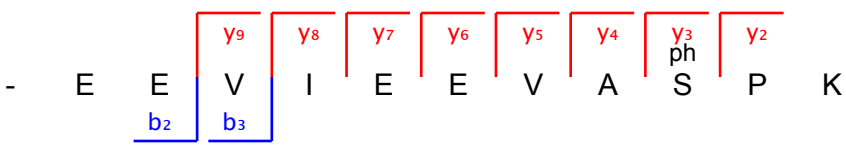

Raw file Scan Method Score m/z  
 Recip\_2\_38\_45 15843 FTMS; HCD 119.75 490.75

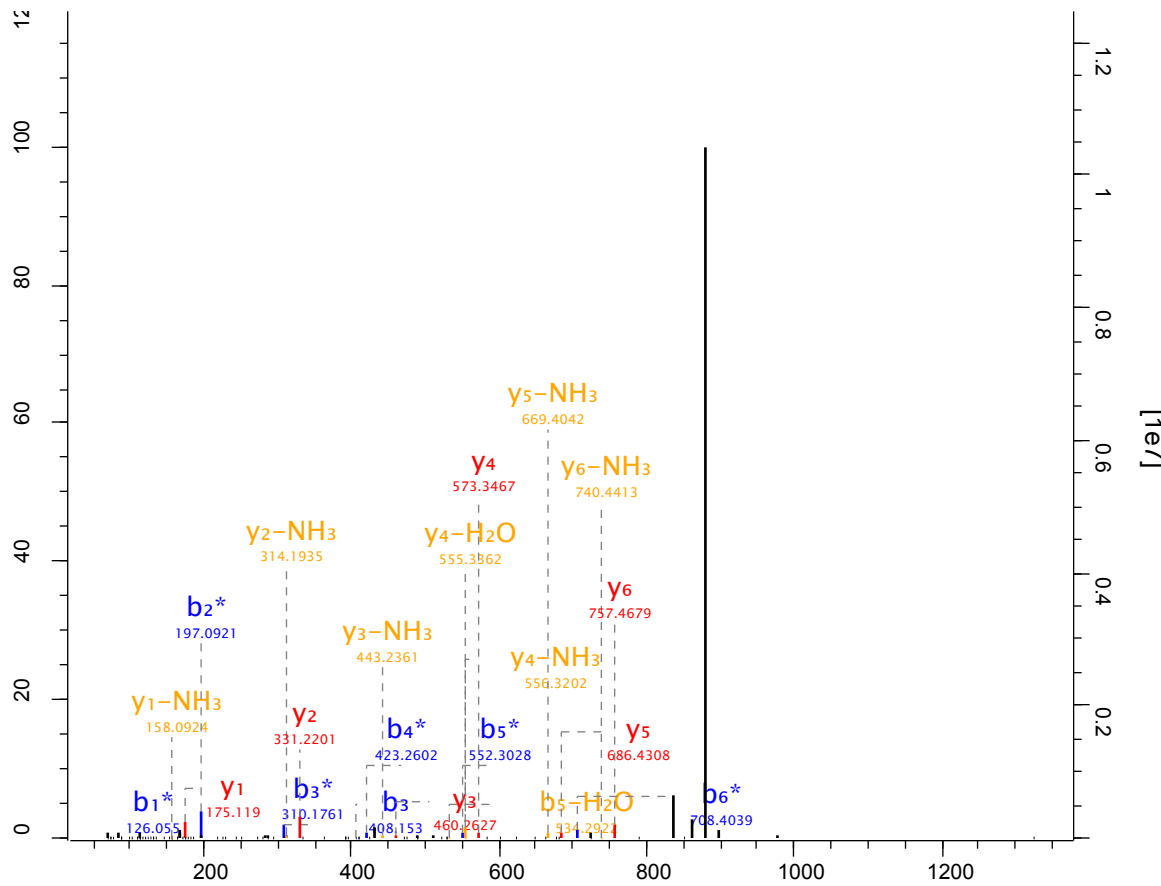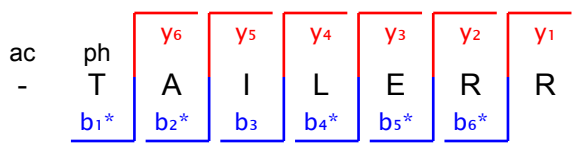

Raw file Scan Method Score m/z  
 Recip\_2\_38\_45 15942 FTMS; HCD 239.55 869.38

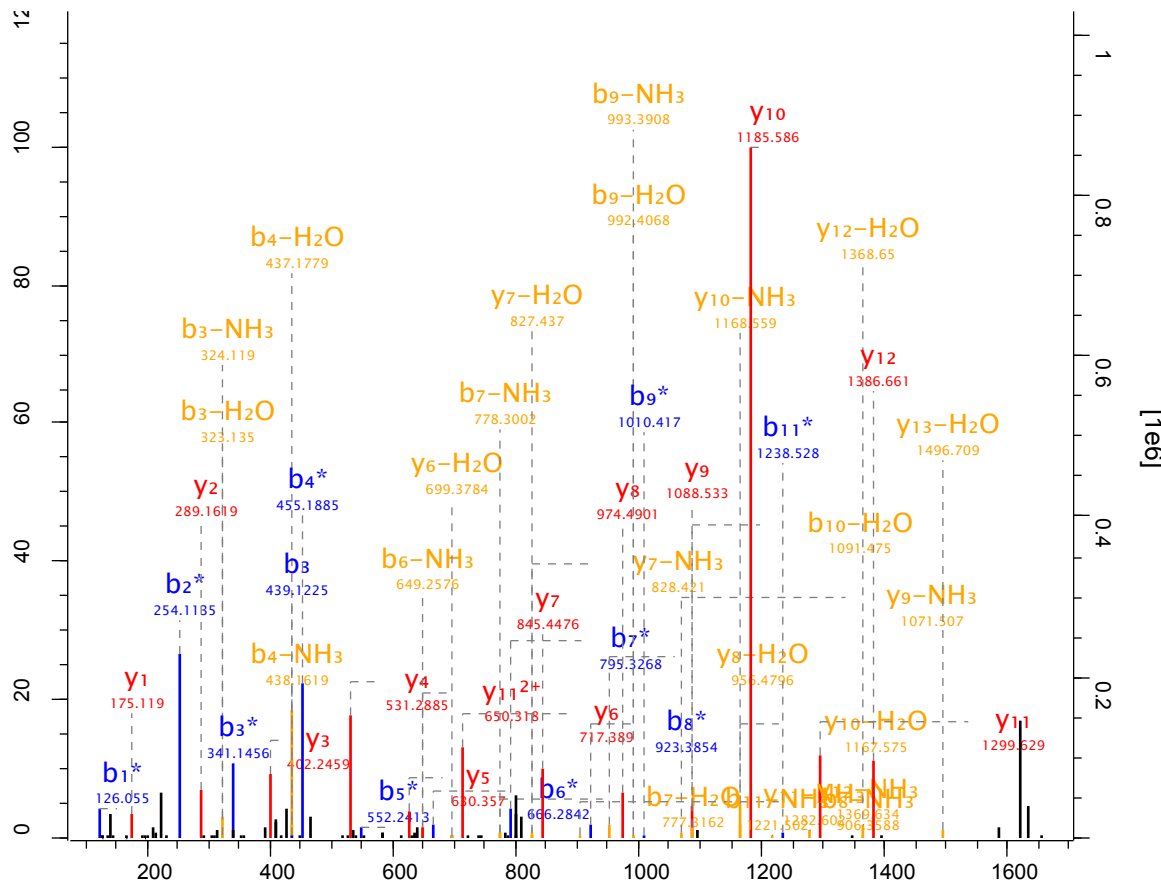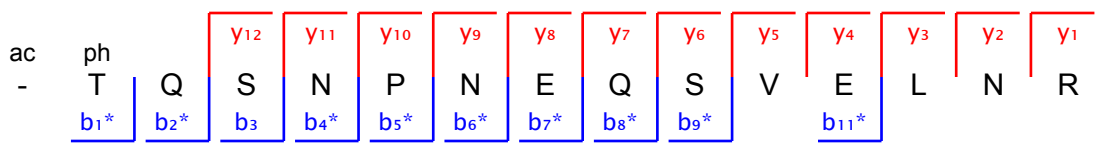

Raw file Scan Method Score m/z  
 Recip\_2\_38\_45 16041 FTMS; HCD 145.55 813.34

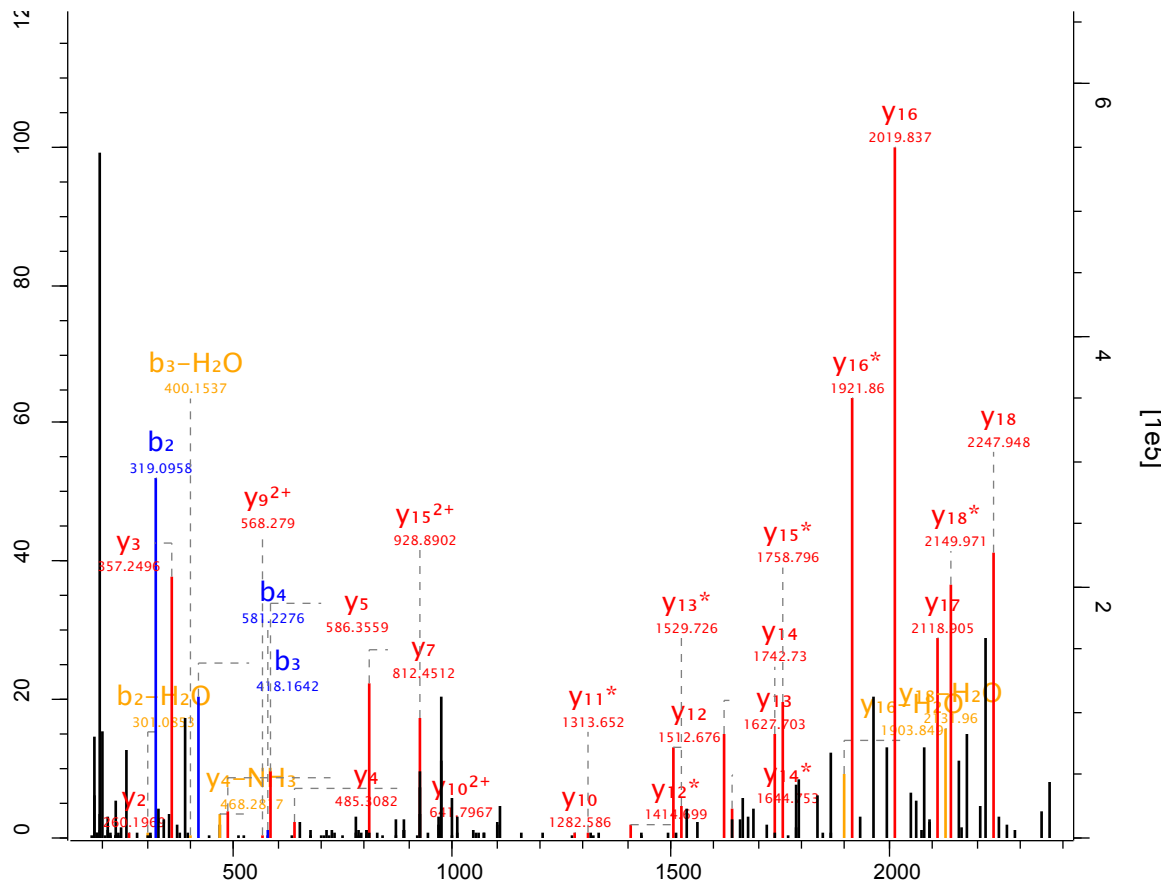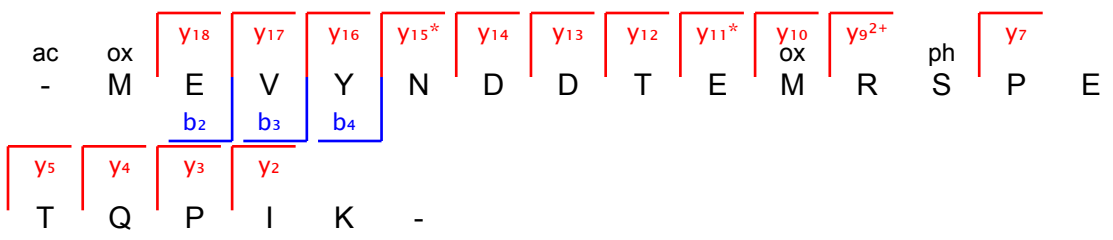



| Raw file      | Scan | Method    | Score | m/z    |
|---------------|------|-----------|-------|--------|
| Recip_2_38_45 | 1607 | FTMS; HCD | 48.57 | 531.75 |

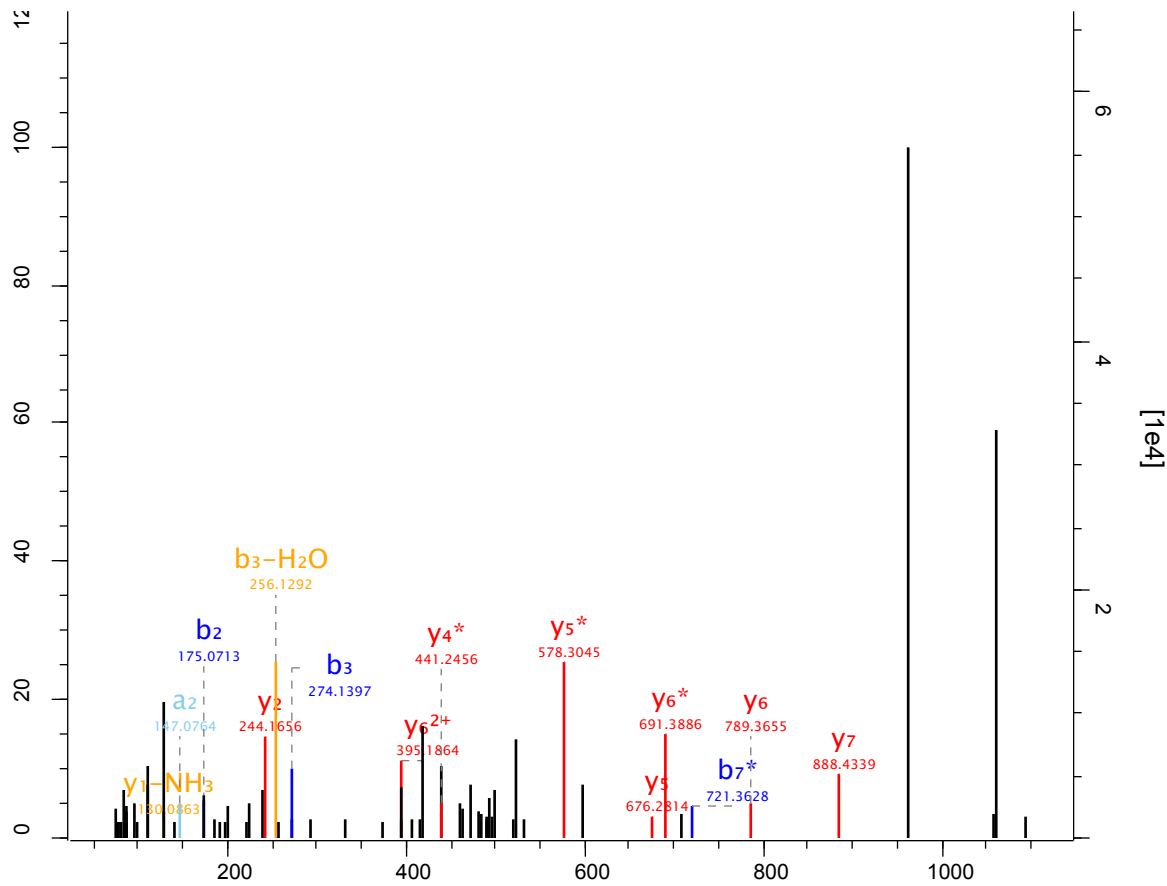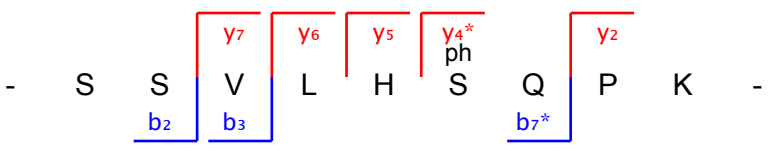

Raw file Scan Method Score m/z  
 Recip\_2\_38\_45 17455 FTMS; HCD 169.19 965.45

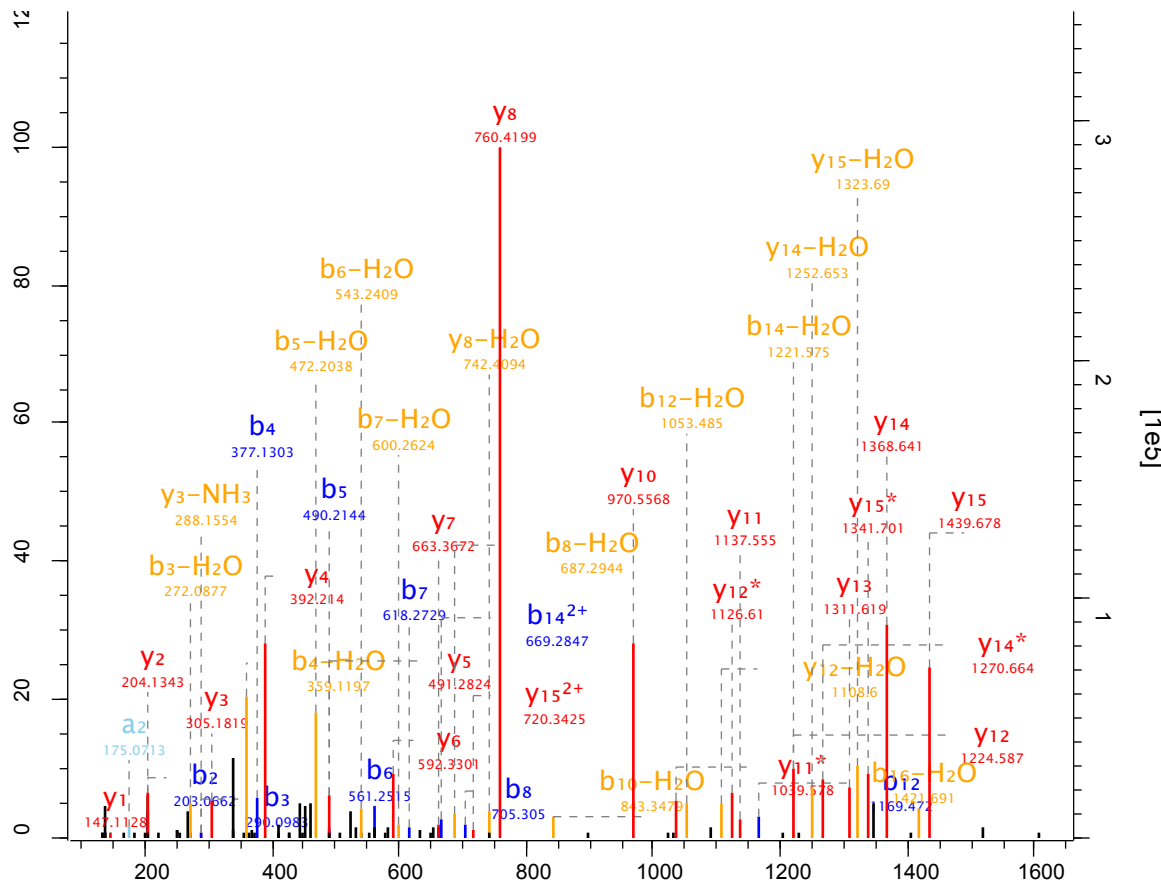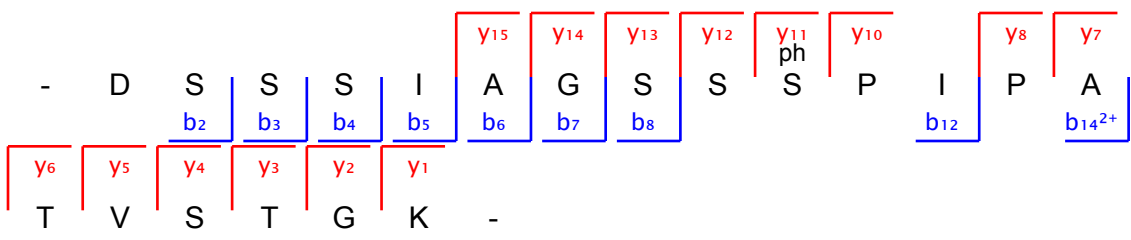

Raw file Scan Method Score m/z  
 Recip\_2\_38\_45 17483 FTMS; HCD 69.36 692.28

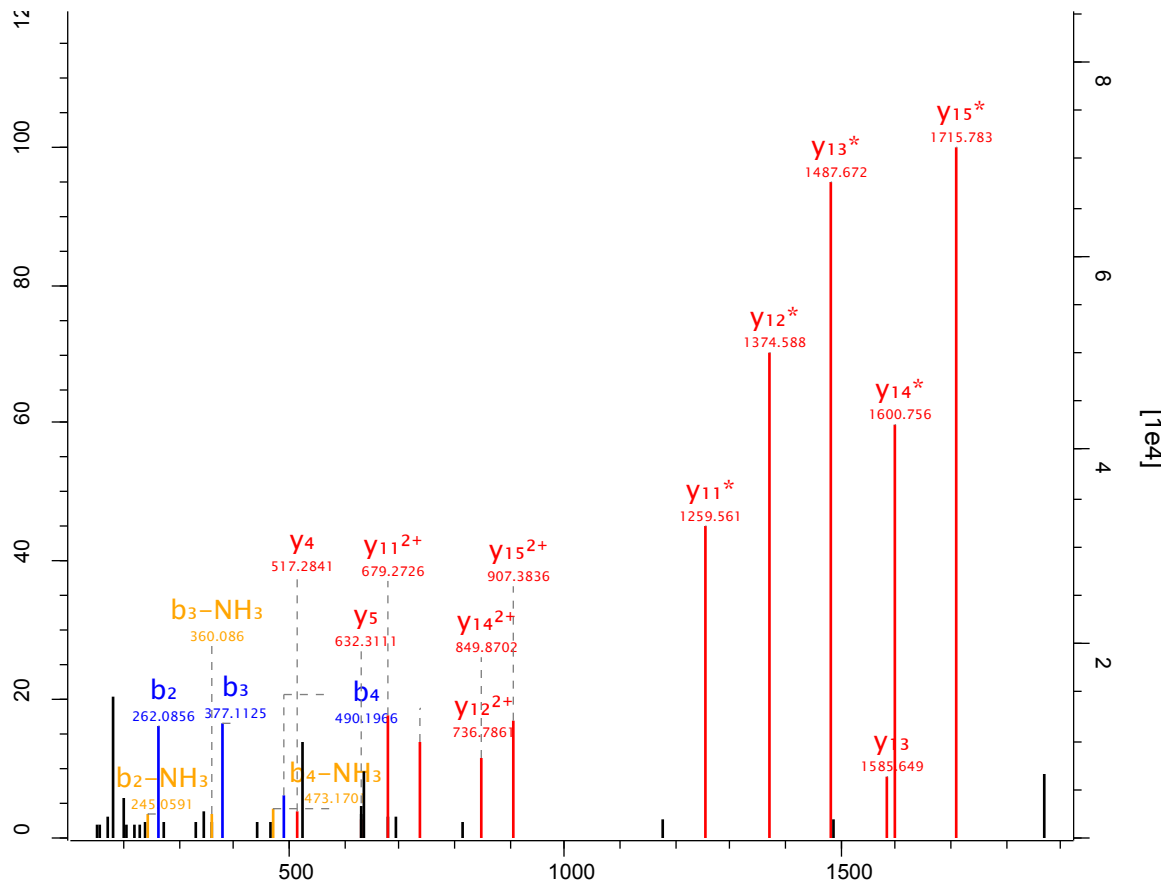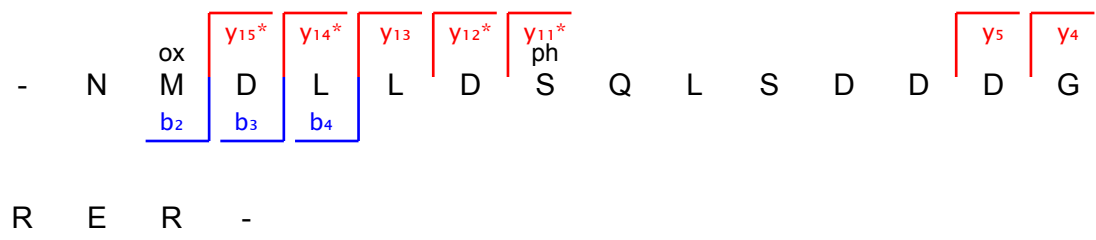

Raw file Scan Method Score m/z  
 Recip\_2\_38\_45 17494 FTMS; HCD 100.02 889.37

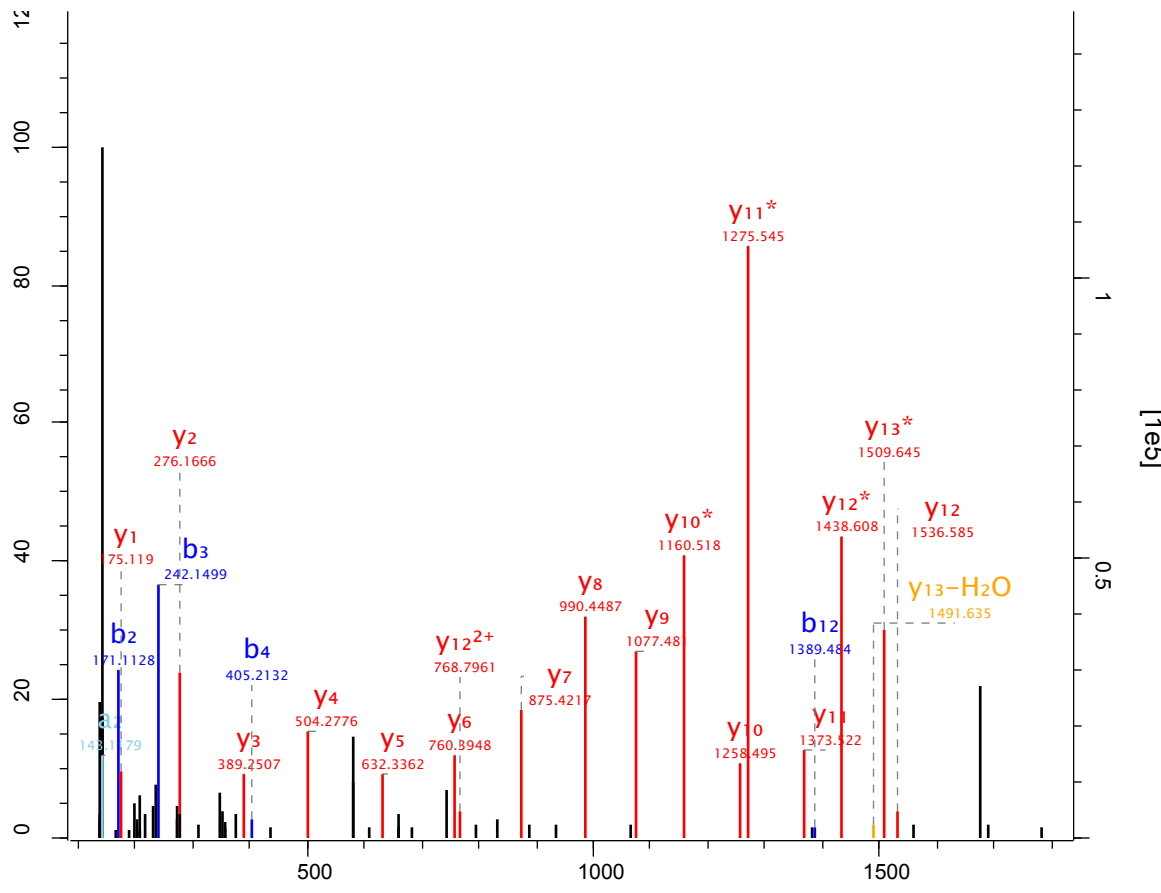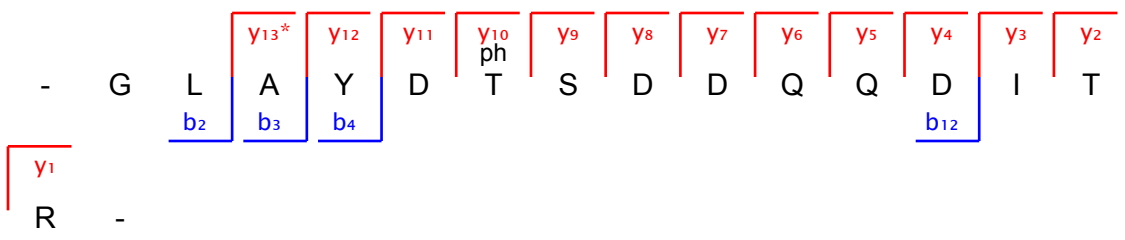

Raw file Scan Method Score m/z  
 Recip\_2\_38\_45 18214 FTMS; HCD 66.76 784.02

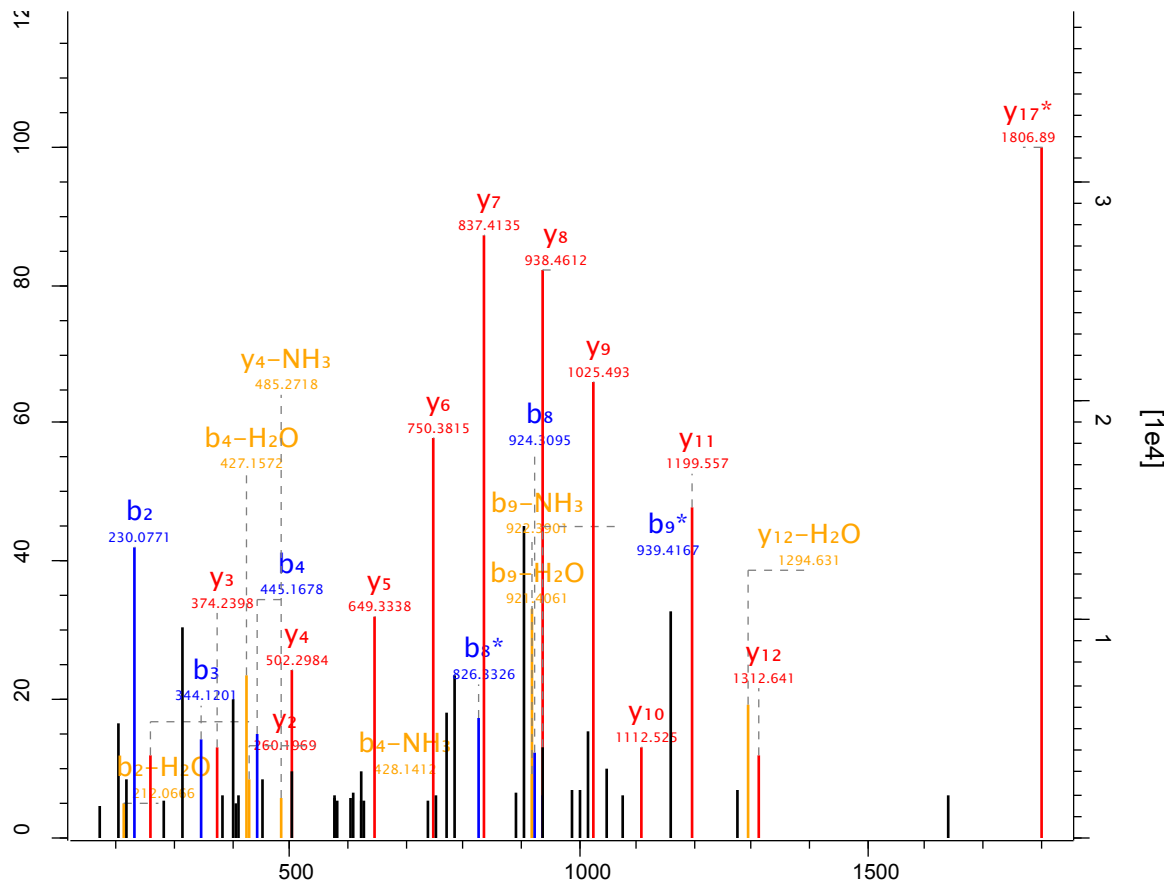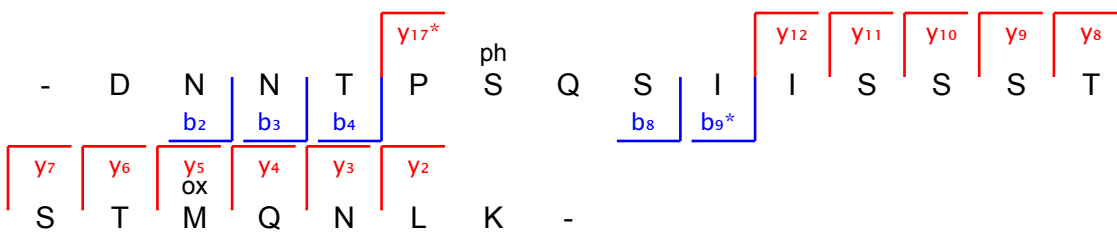

Raw file Scan Method Score m/z  
 Recip\_2\_38\_45 1905 FTMS; HCD 115.12 561.25

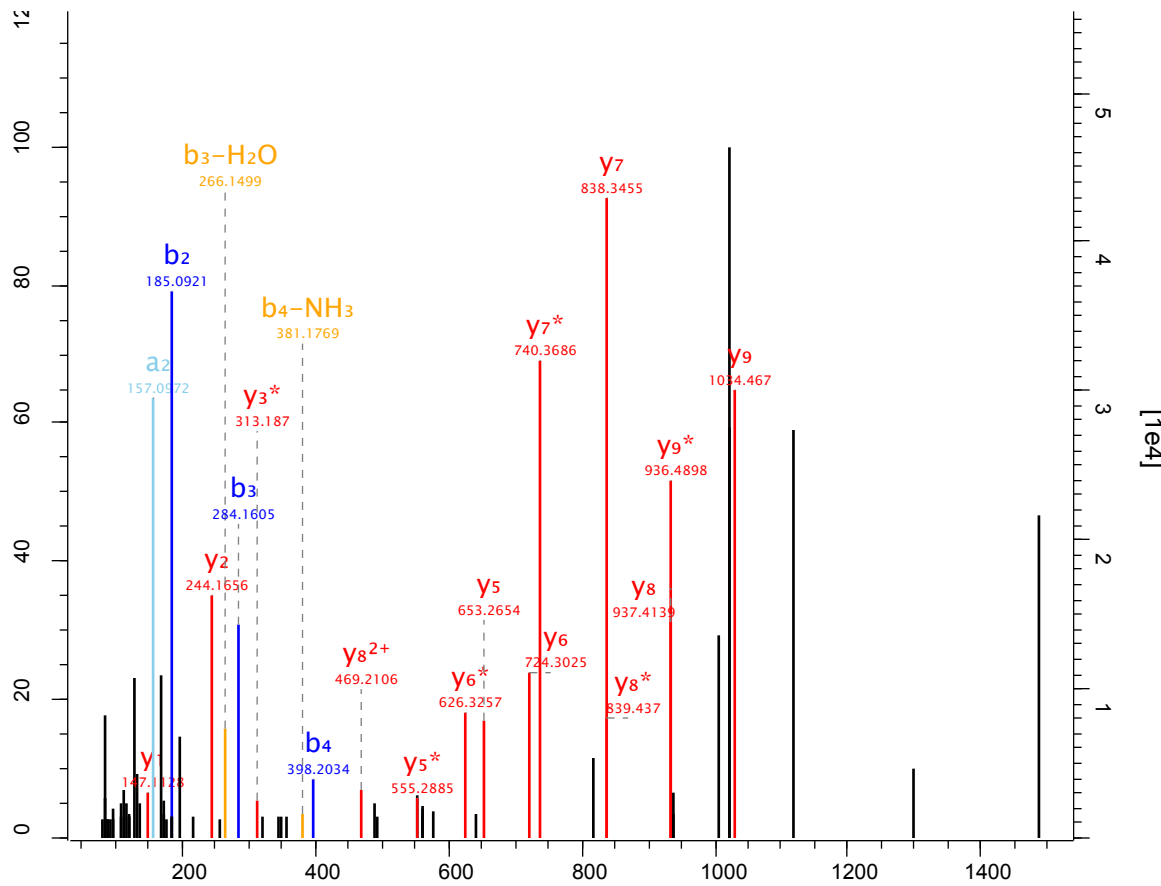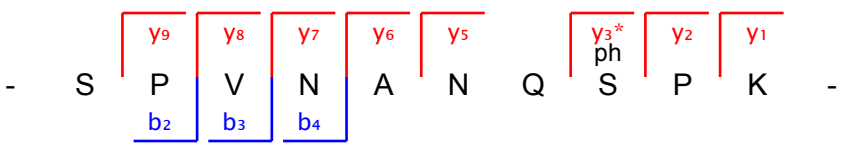

Raw file Scan Method Score m/z  
 Recip\_2\_38\_45 1990 FTMS; HCD 136.66 571.91

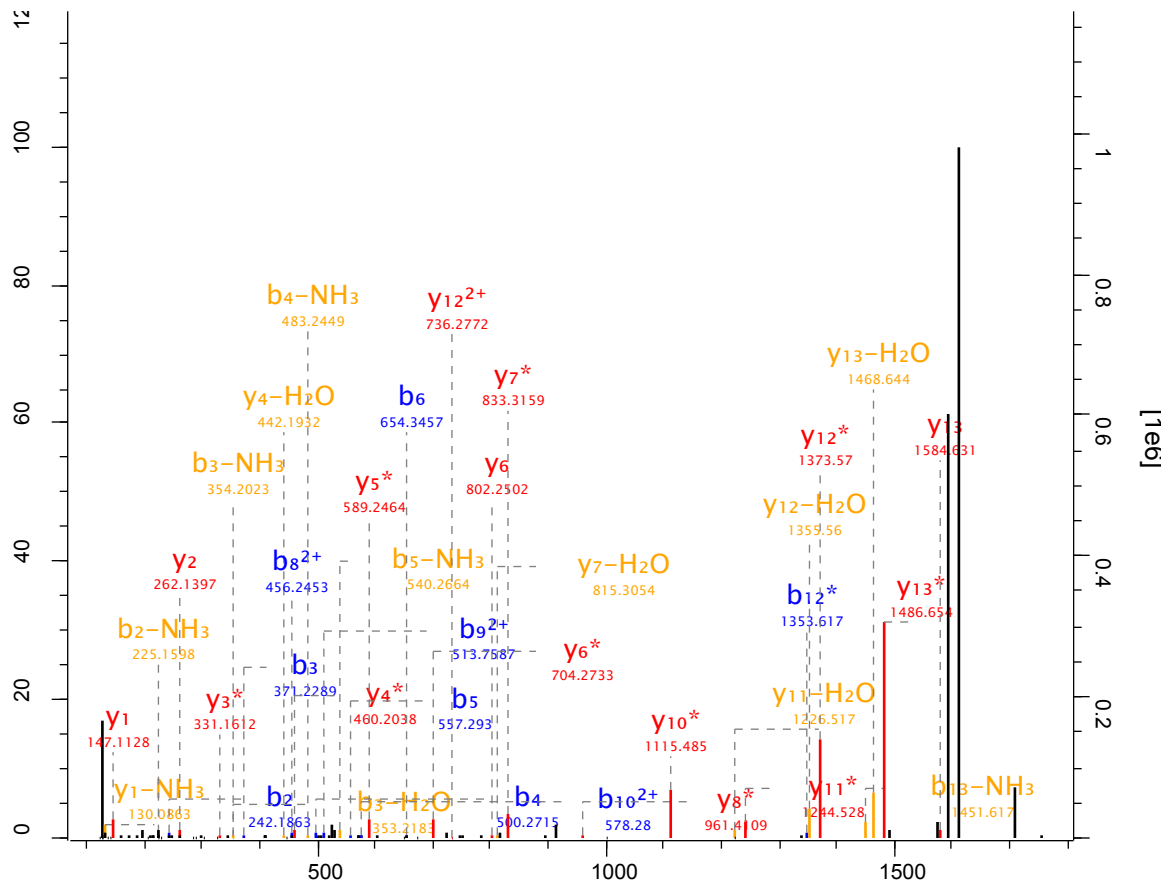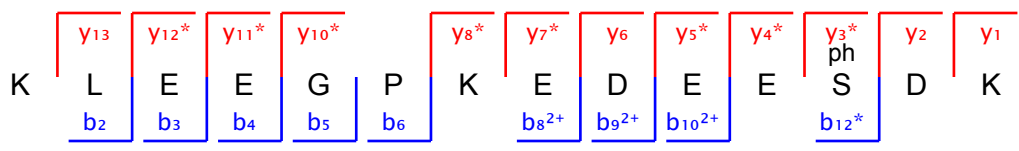

| Raw file      | Scan  | Method    | Score | m/z    |
|---------------|-------|-----------|-------|--------|
| Recip_2_38_45 | 20030 | FTMS; HCD | 44.51 | 800.82 |

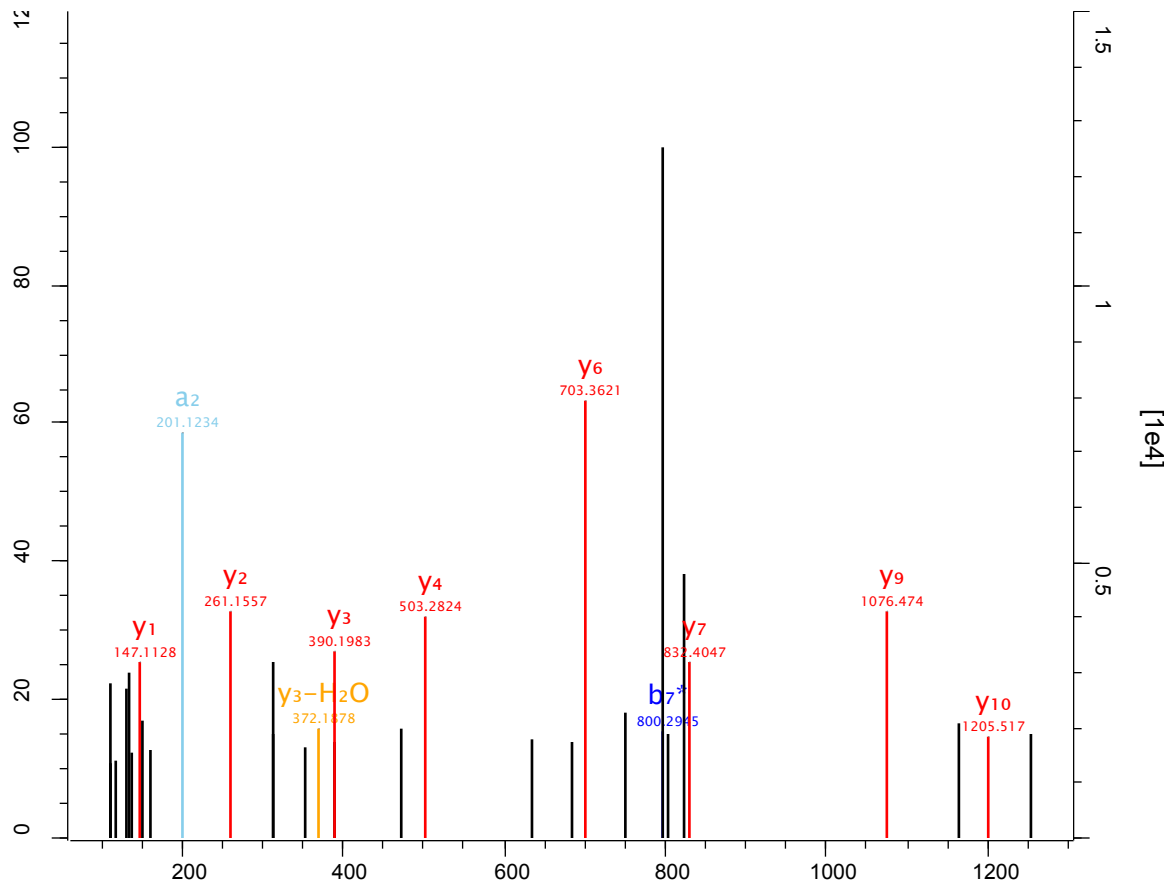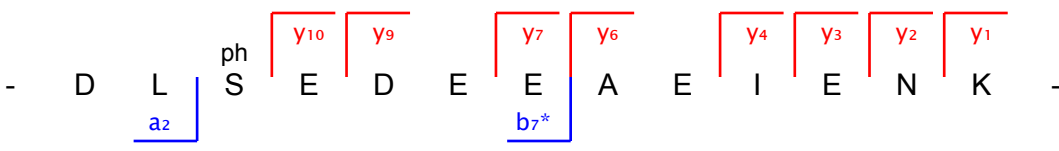



Raw file Scan Method Score m/z  
 Recip\_2\_38\_45 20428 FTMS; HCD 62.19 764.99

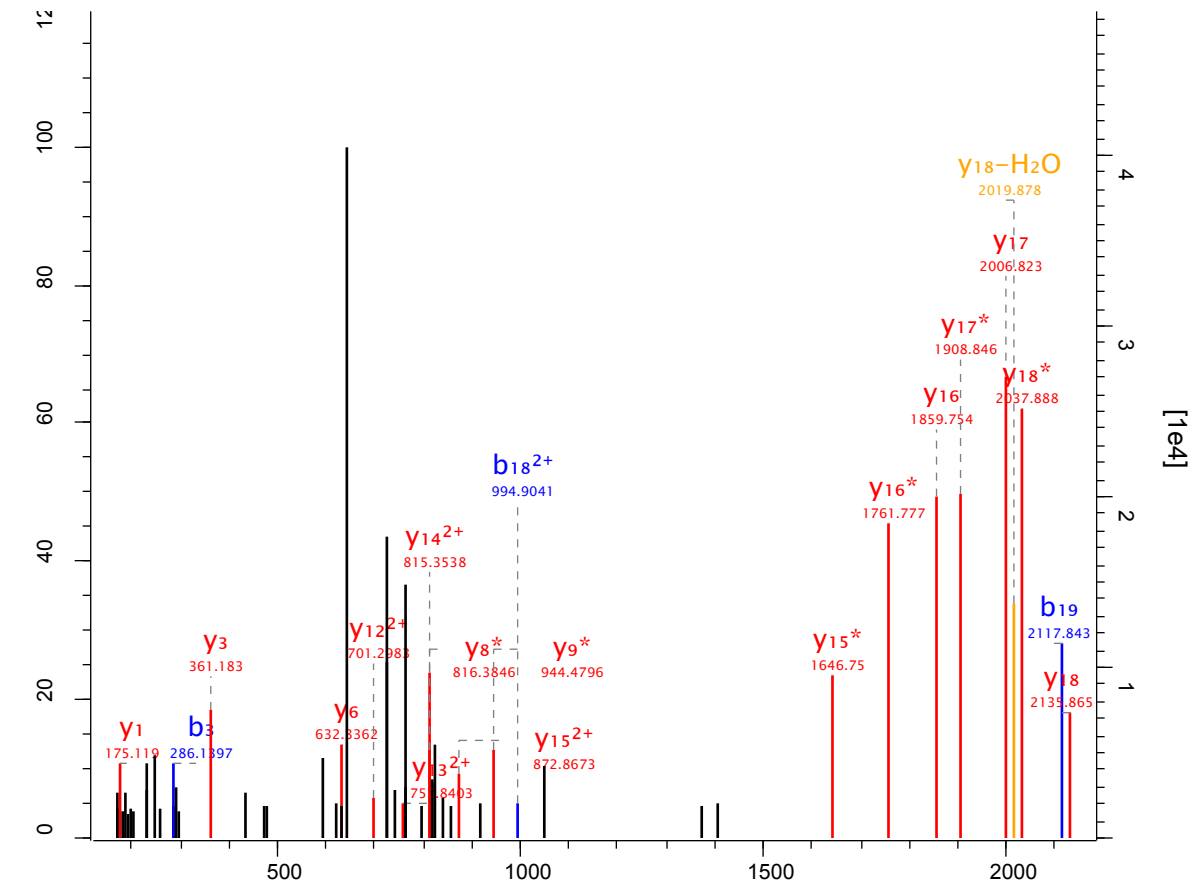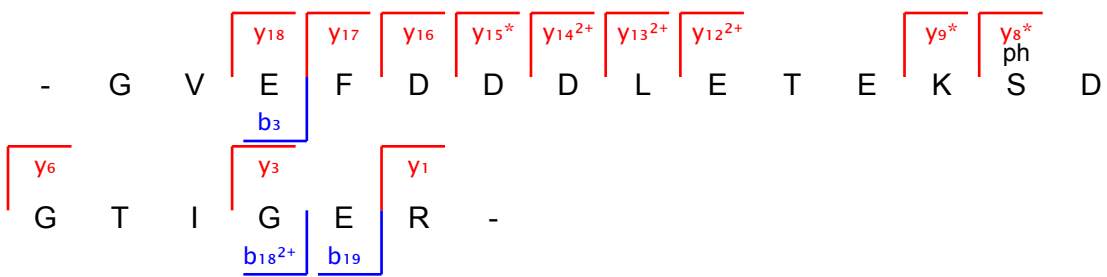

Raw file Scan Method Score m/z  
 Recip\_2\_38\_45 20603 FTMS; HCD 59.59 758.37

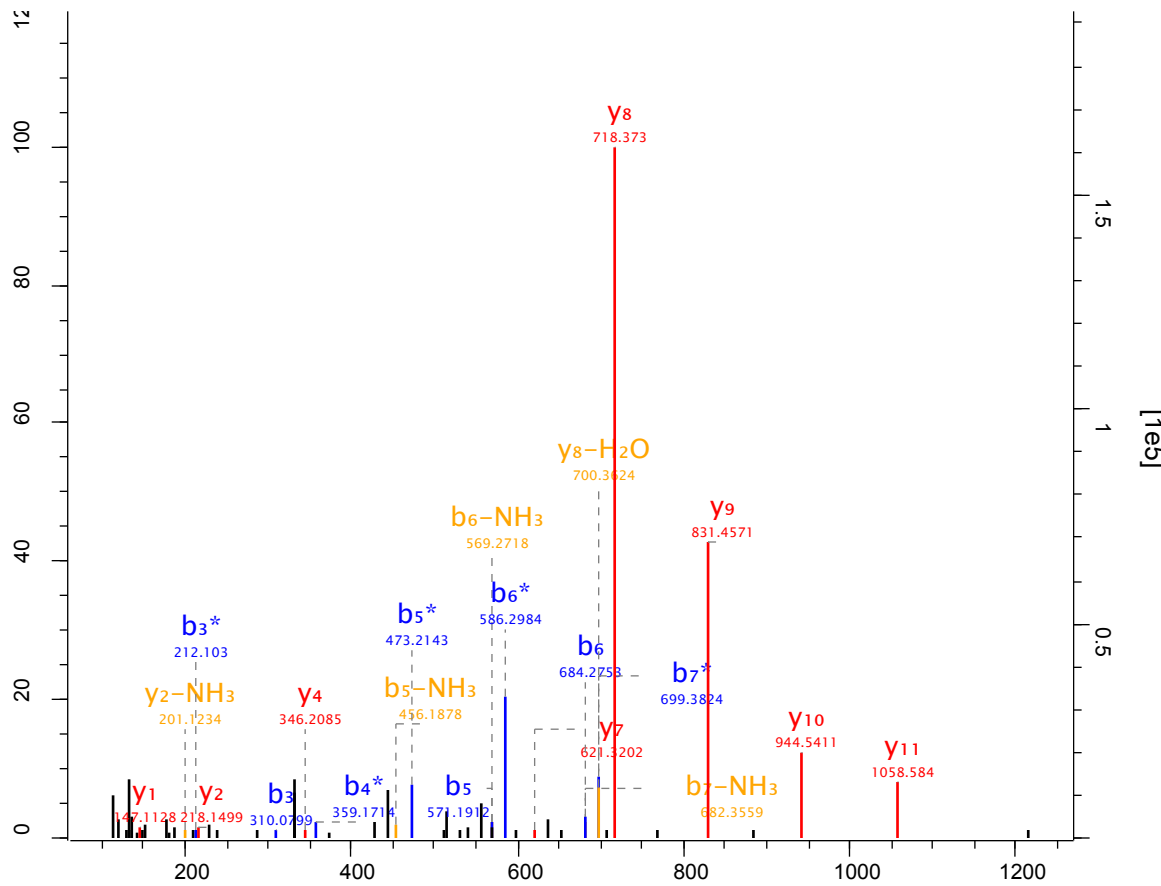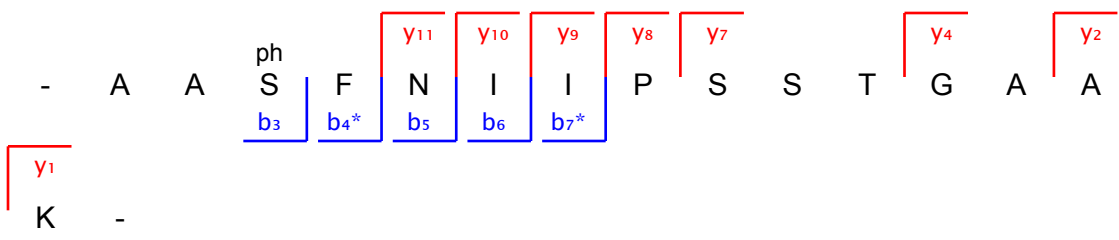

Raw file Scan Method Score m/z  
 Recip\_2\_38\_45 21359 FTMS; HCD 41.53 822.39

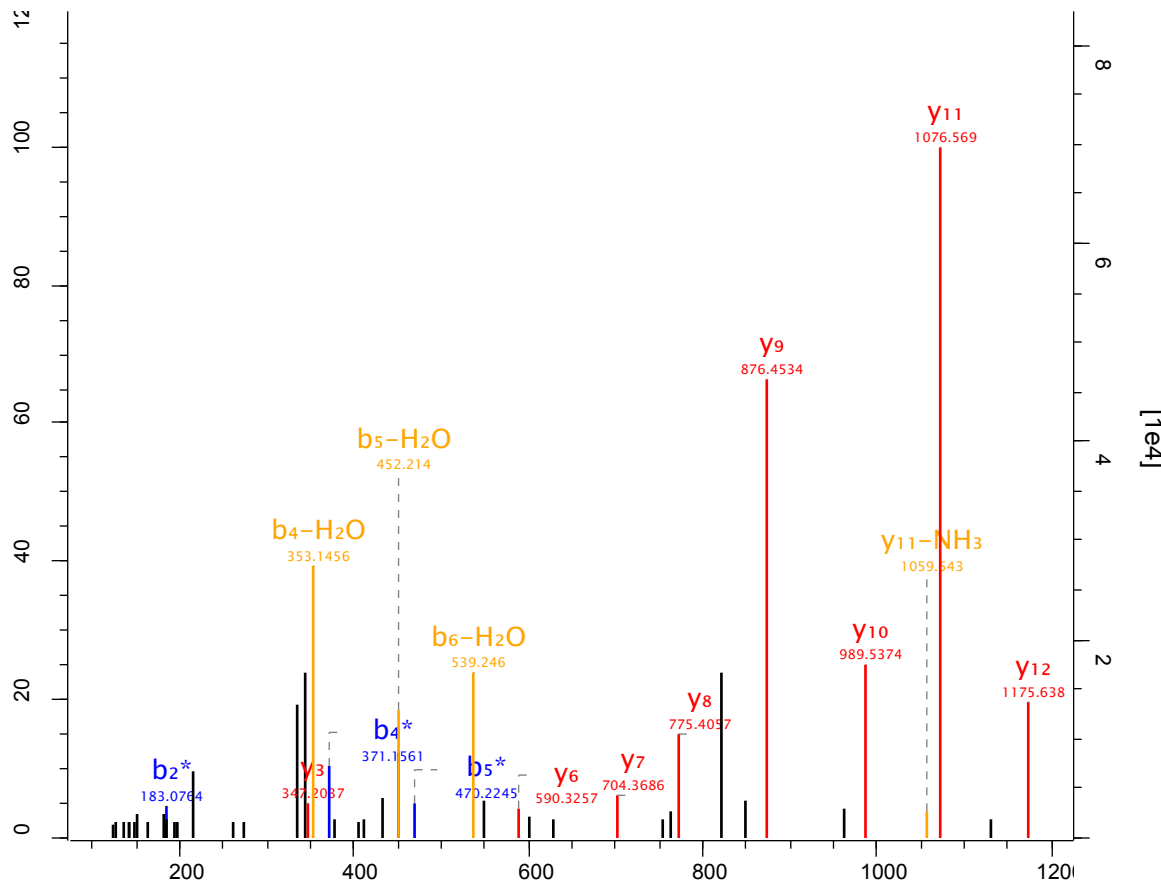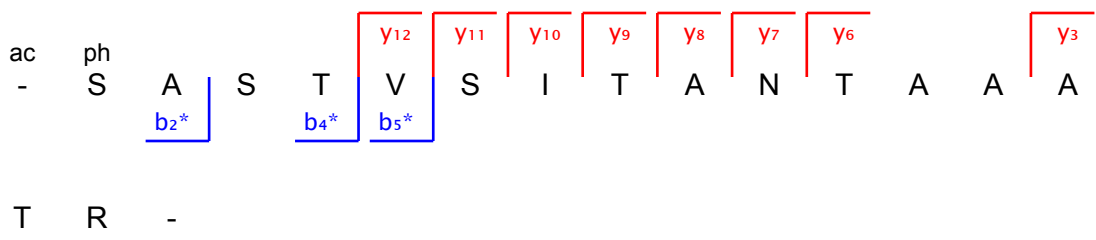

Raw file Scan Method Score m/z  
 Recip\_2\_38\_45 21642 FTMS; HCD 193.77 779.33

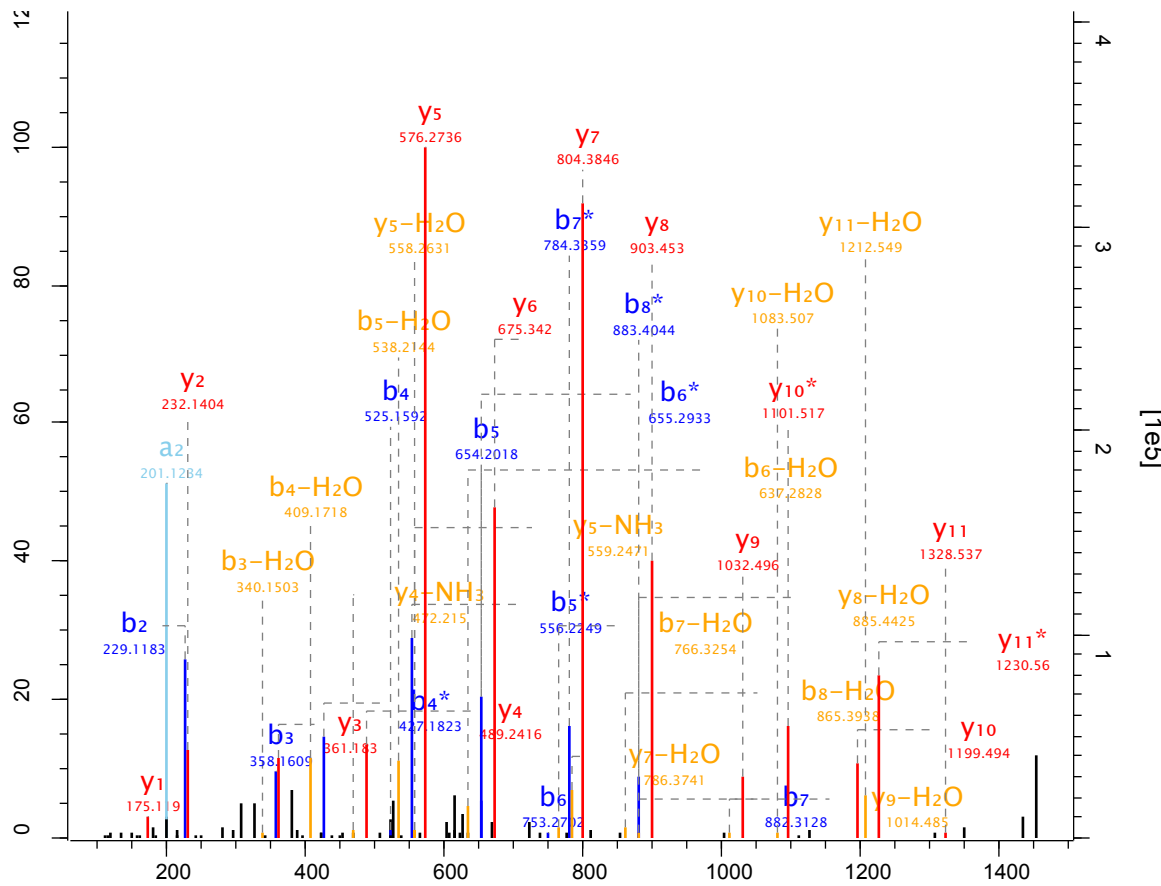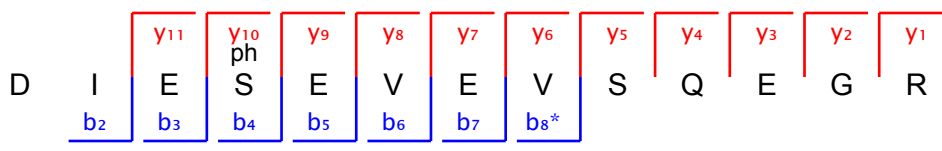

Raw file Scan Method Score m/z  
 Recip\_2\_38\_45 22625 FTMS; HCD 50.96 843.39

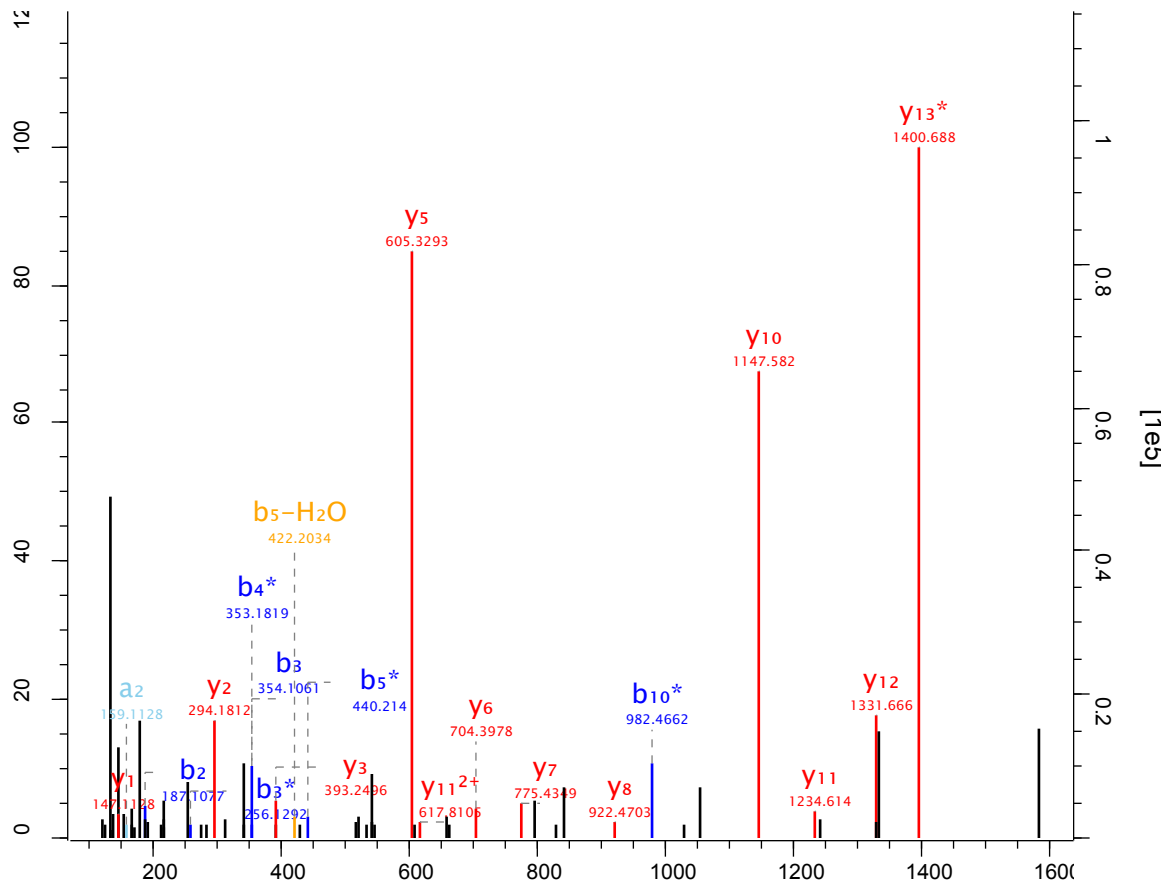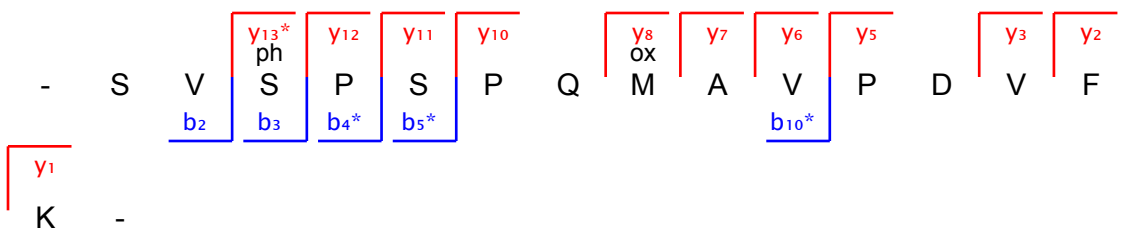

Raw file Scan Method Score m/z  
 Recip\_2\_38\_45 22895 FTMS; HCD 144.72 947.92

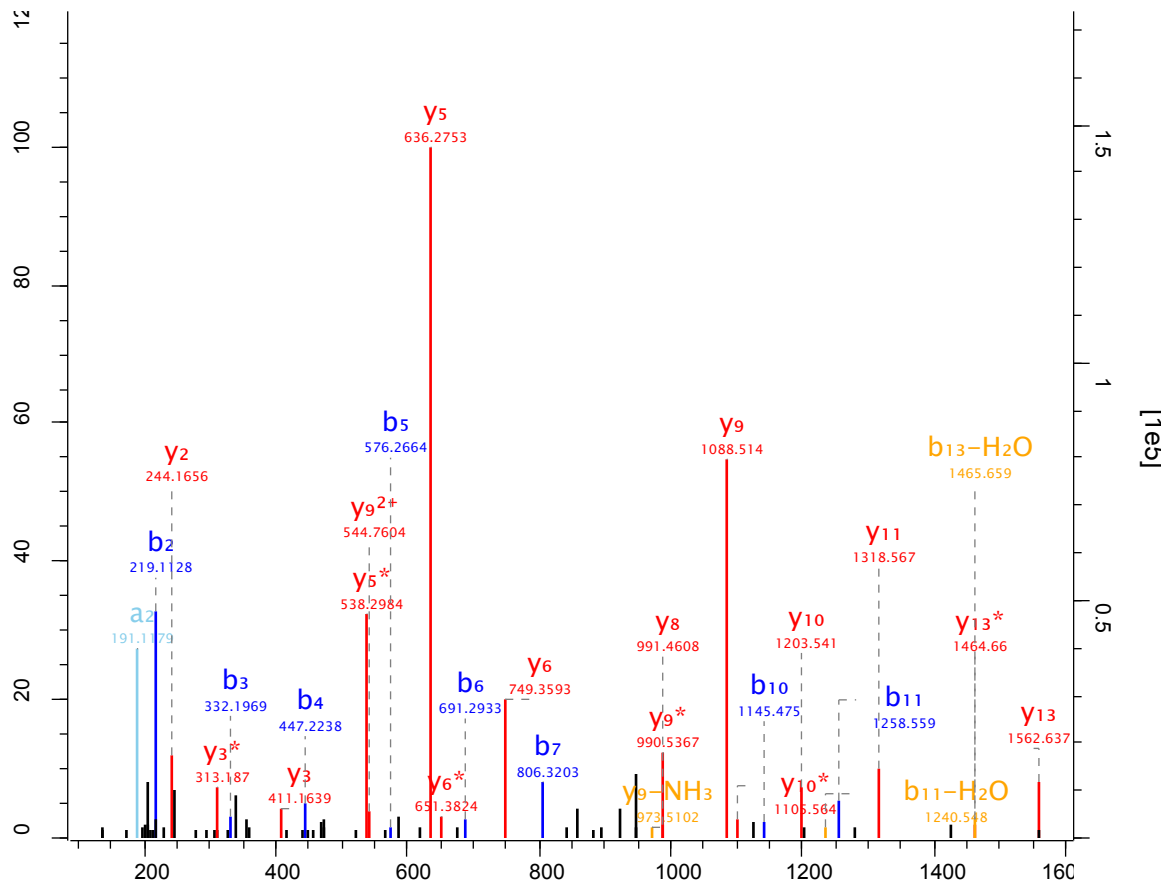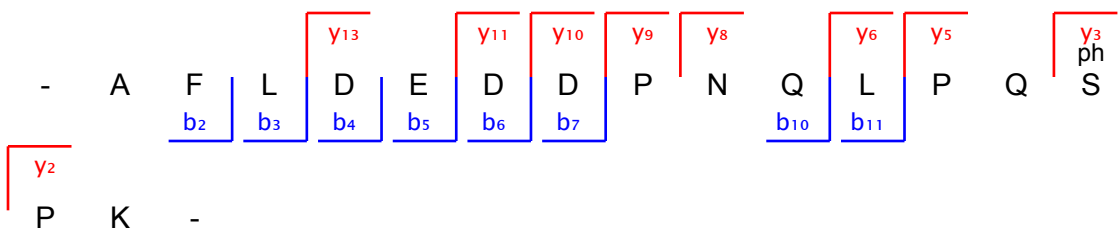

Raw file Scan Method Score m/z  
 Recip\_2\_38\_45 23874 FTMS; HCD 45.04 866.39

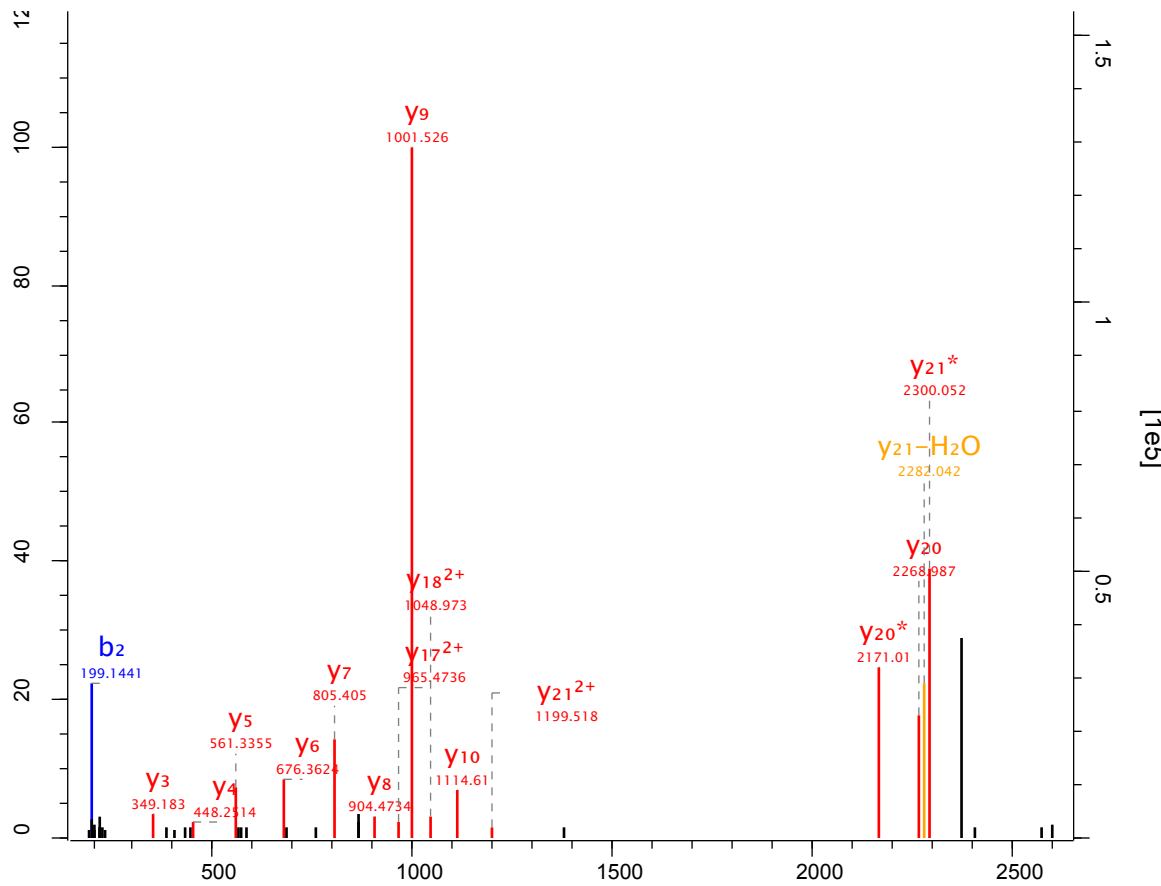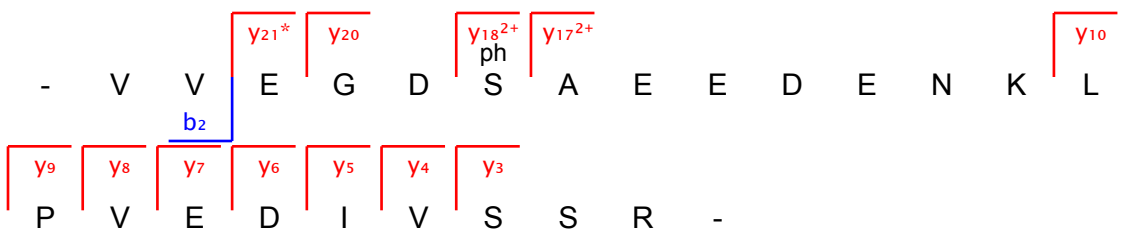

| Raw file      | Scan | Method    | Score | m/z    |
|---------------|------|-----------|-------|--------|
| Recip_2_38_45 | 2397 | FTMS; HCD | 43.31 | 535.24 |

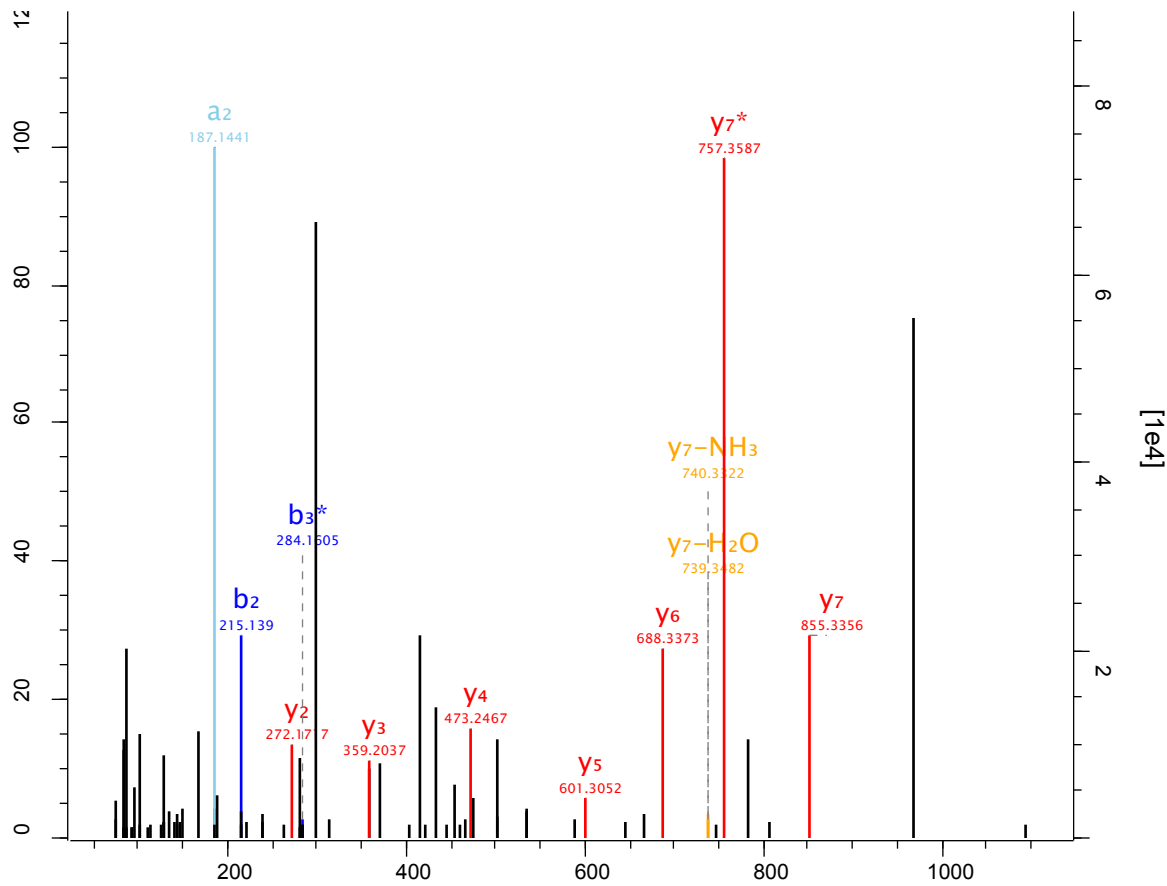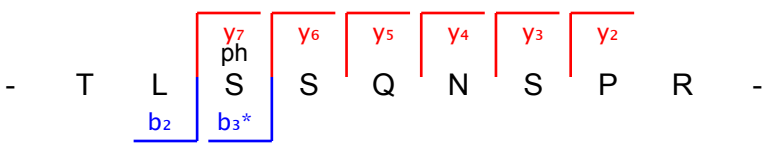



Raw file Scan Method Score m/z  
 Recip\_2\_38\_45 24736 FTMS; HCD 109.1 698.78

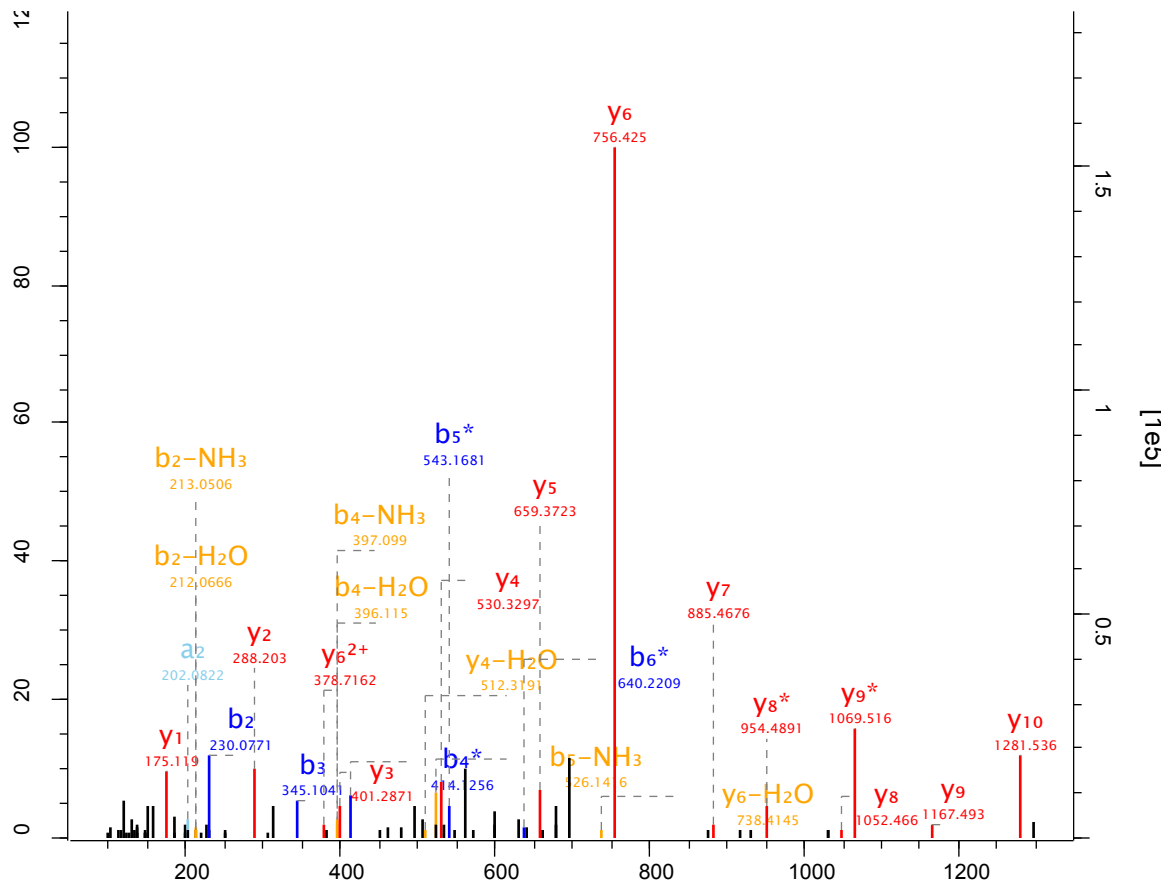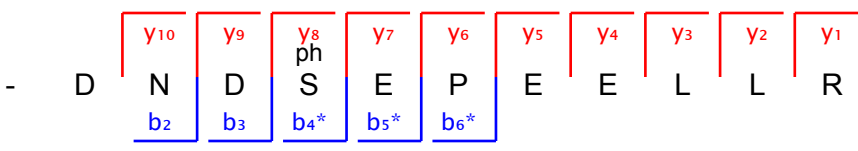

| Raw file      | Scan | Method    | Score | m/z    |
|---------------|------|-----------|-------|--------|
| Recip_2_38_45 | 2479 | FTMS; HCD | 61.56 | 457.19 |

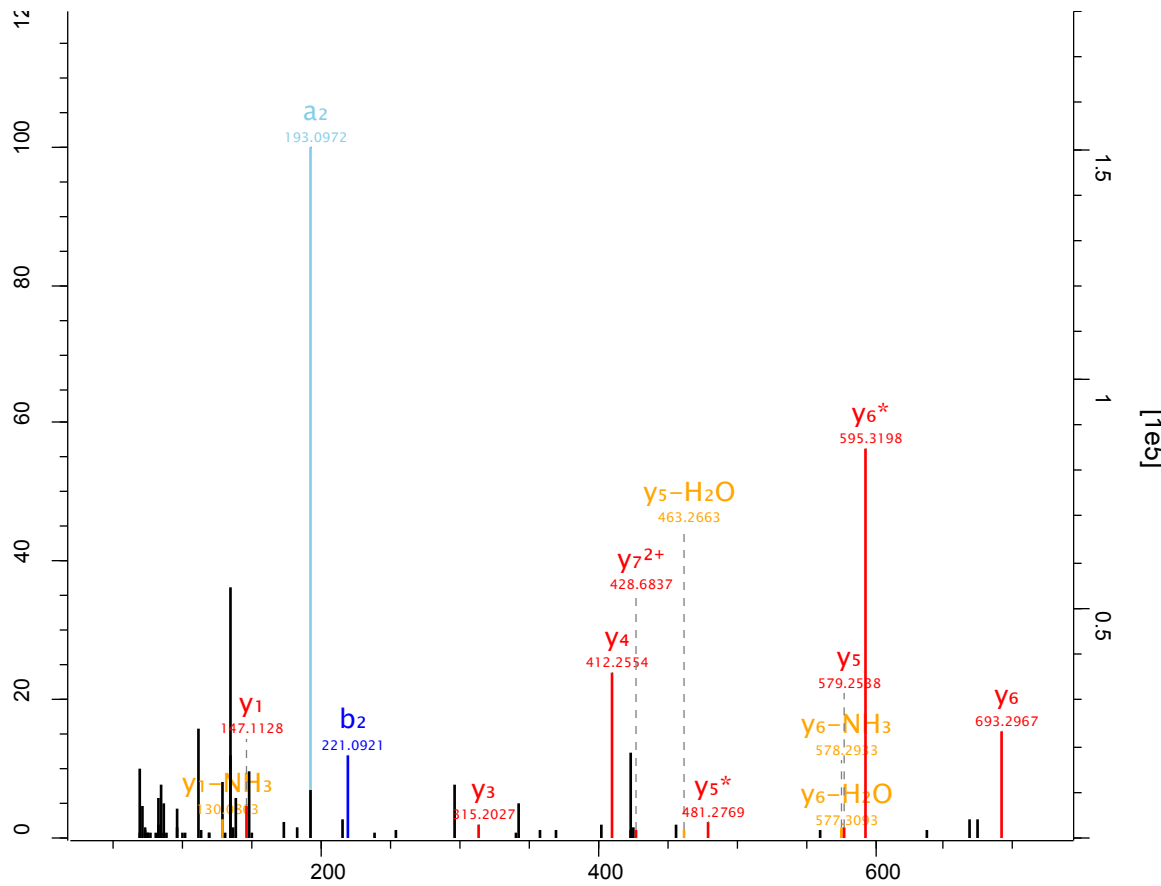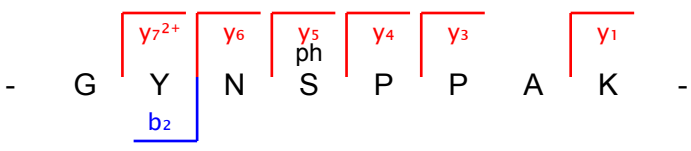

Raw file Scan Method Score m/z  
 Recip\_2\_38\_45 25092 FTMS; HCD 45.92 870.93

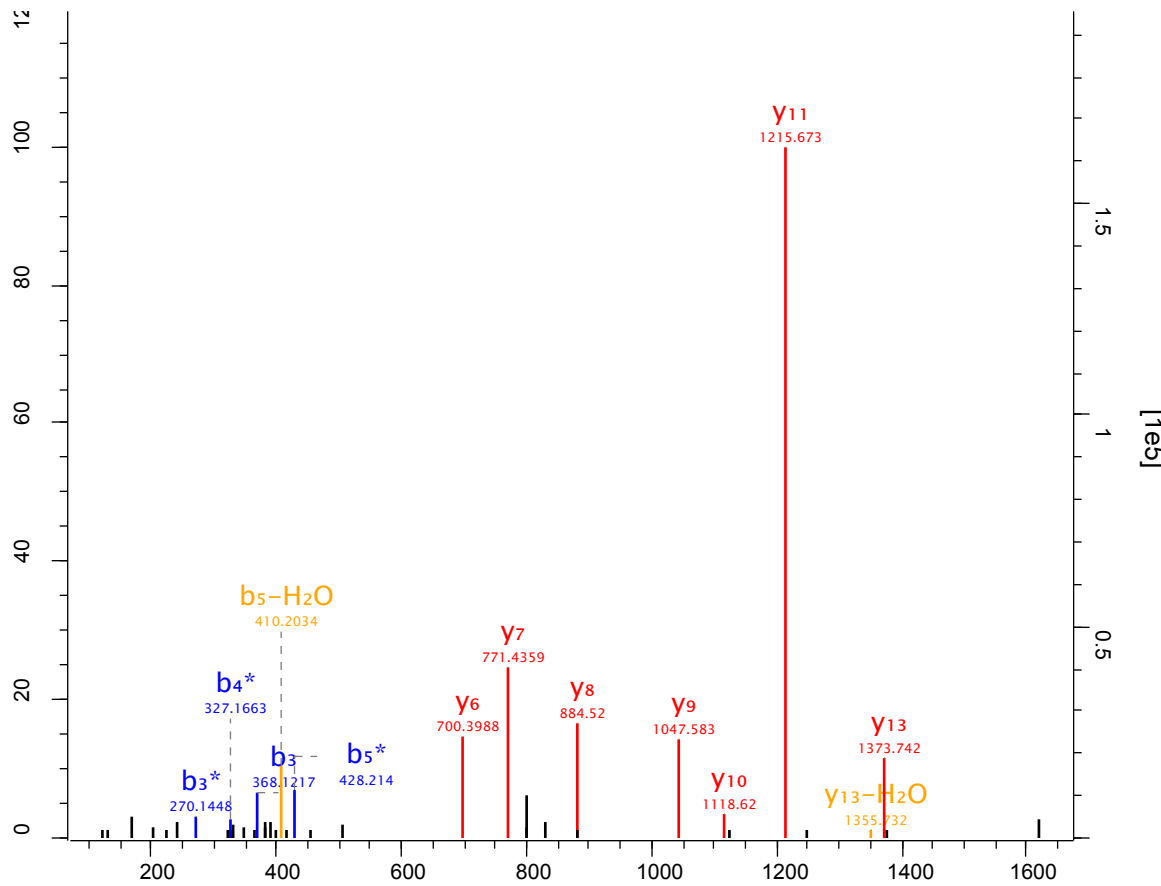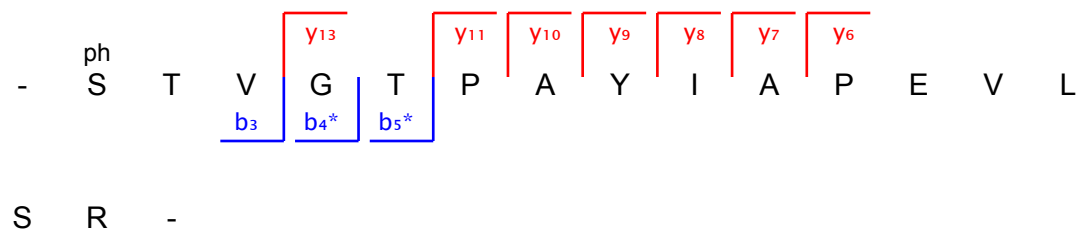

Raw file Scan Method Score m/z  
 Recip\_2\_38\_45 25096 FTMS; HCD 262.25 897.33

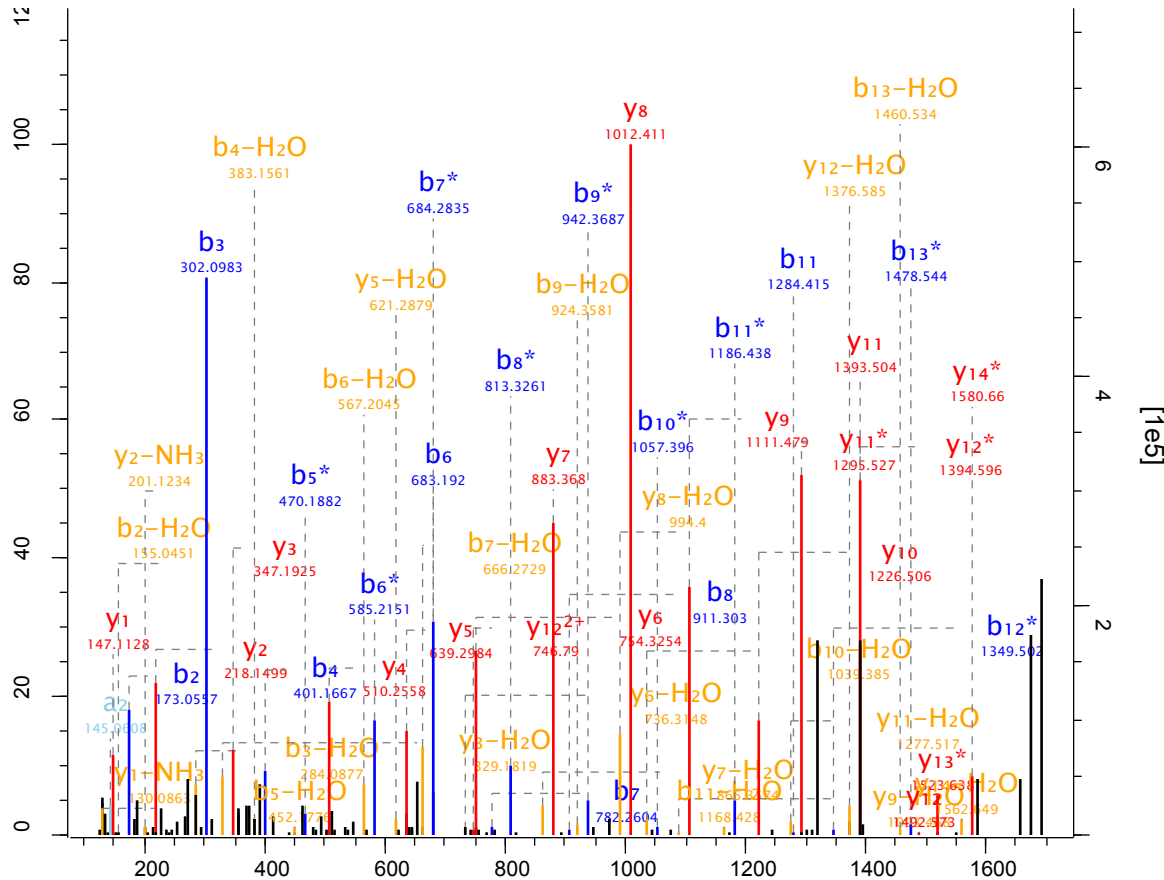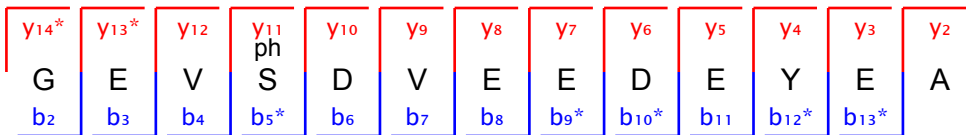

y<sub>1</sub>  
K

Raw file Scan Method Score m/z  
 Recip\_2\_38\_45 29466 FTMS; HCD 91.28 1012.9

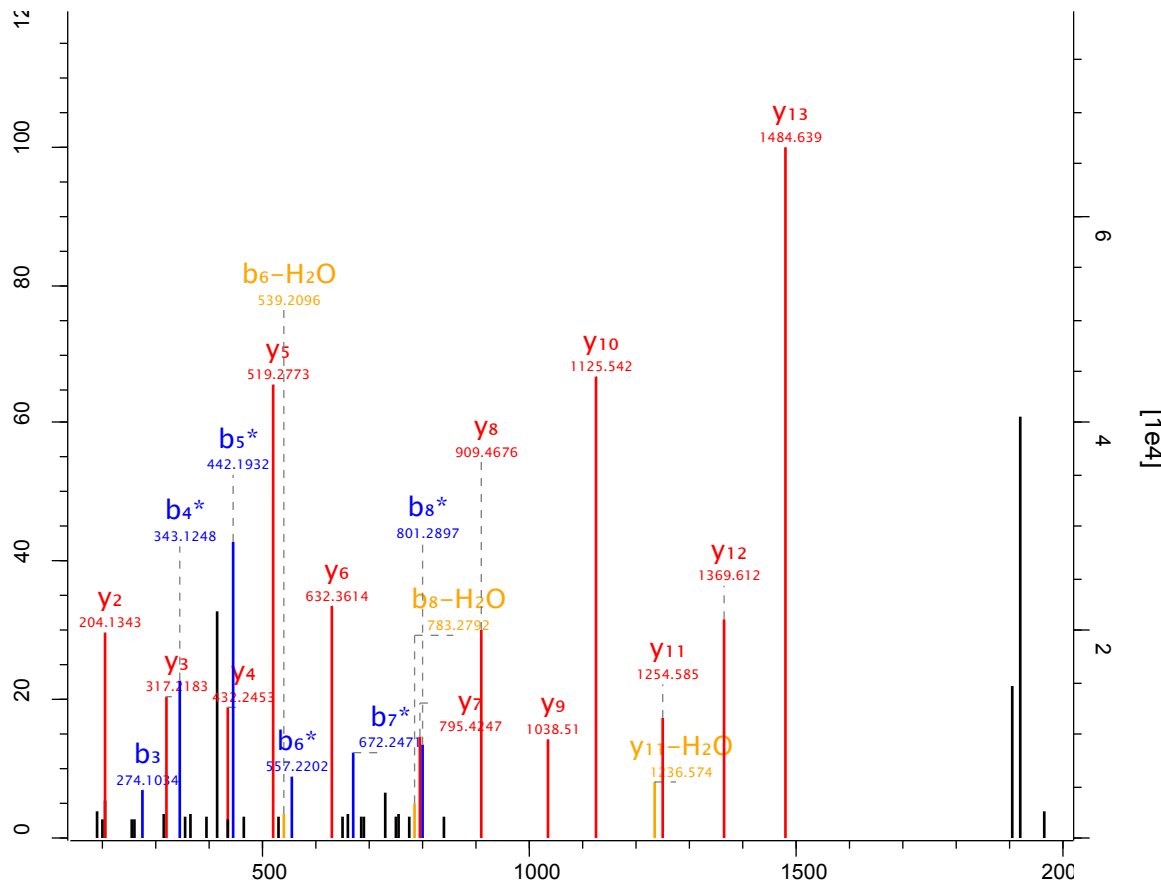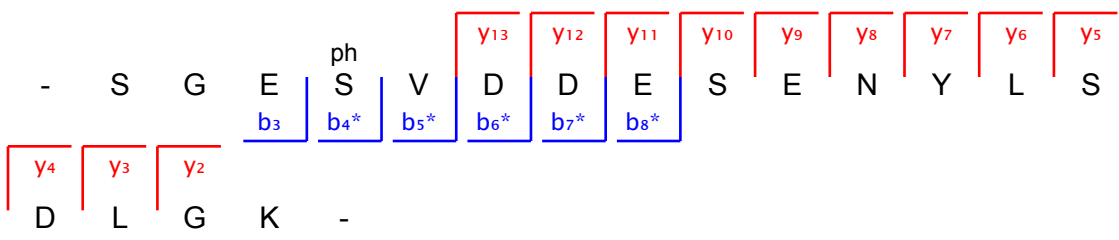

Raw file Scan Method Score m/z  
 Recip\_2\_38\_45 30126 FTMS; HCD 108.44 1023.15

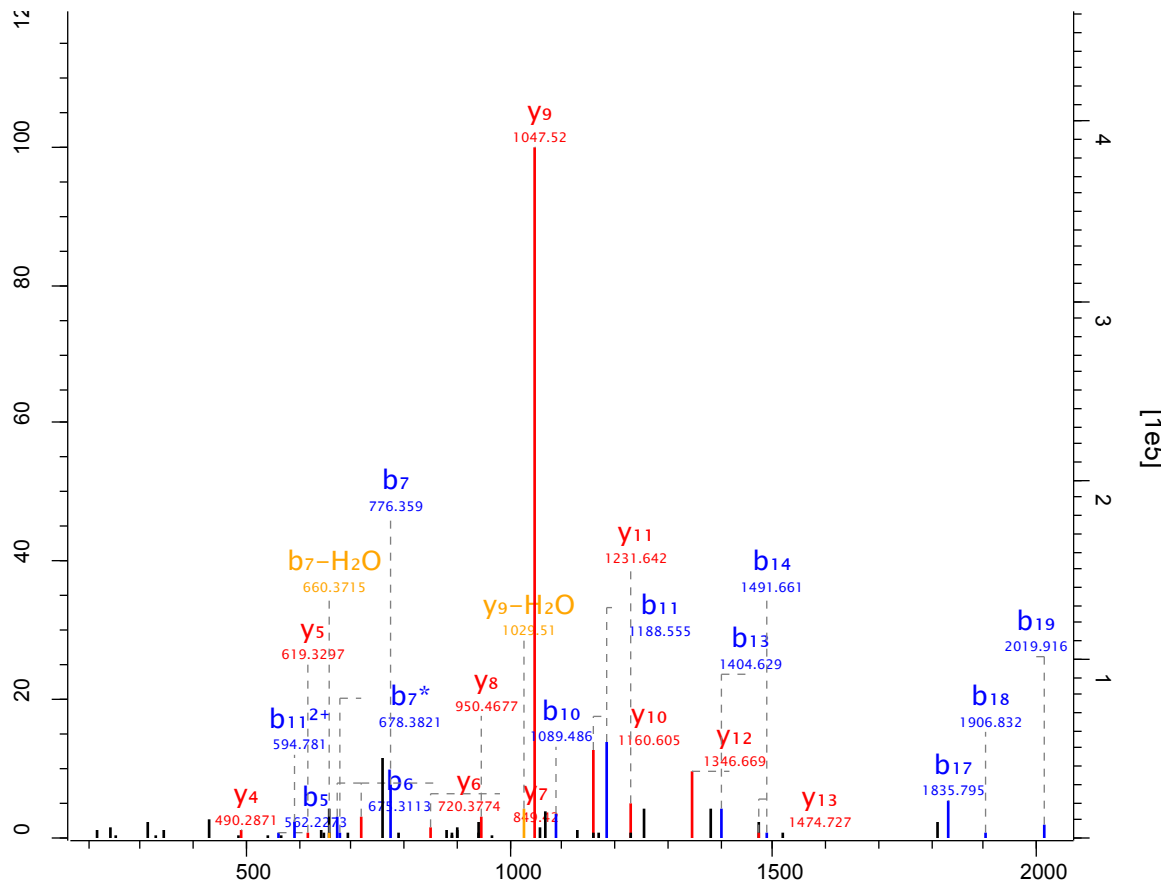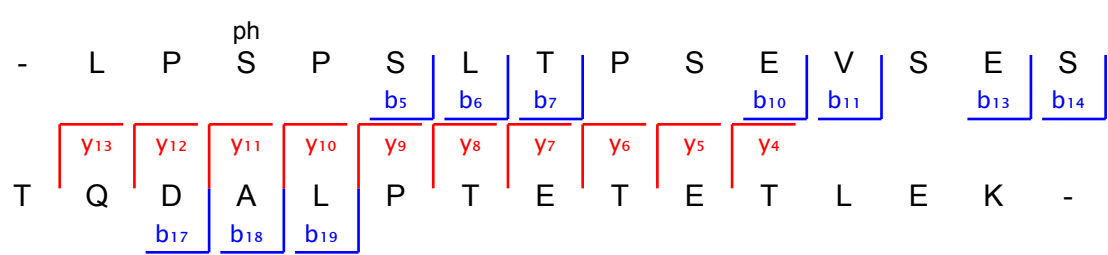

| Raw file      | Scan | Method    | Score | m/z    |
|---------------|------|-----------|-------|--------|
| Recip_2_38_45 | 3119 | FTMS; HCD | 55.26 | 506.21 |

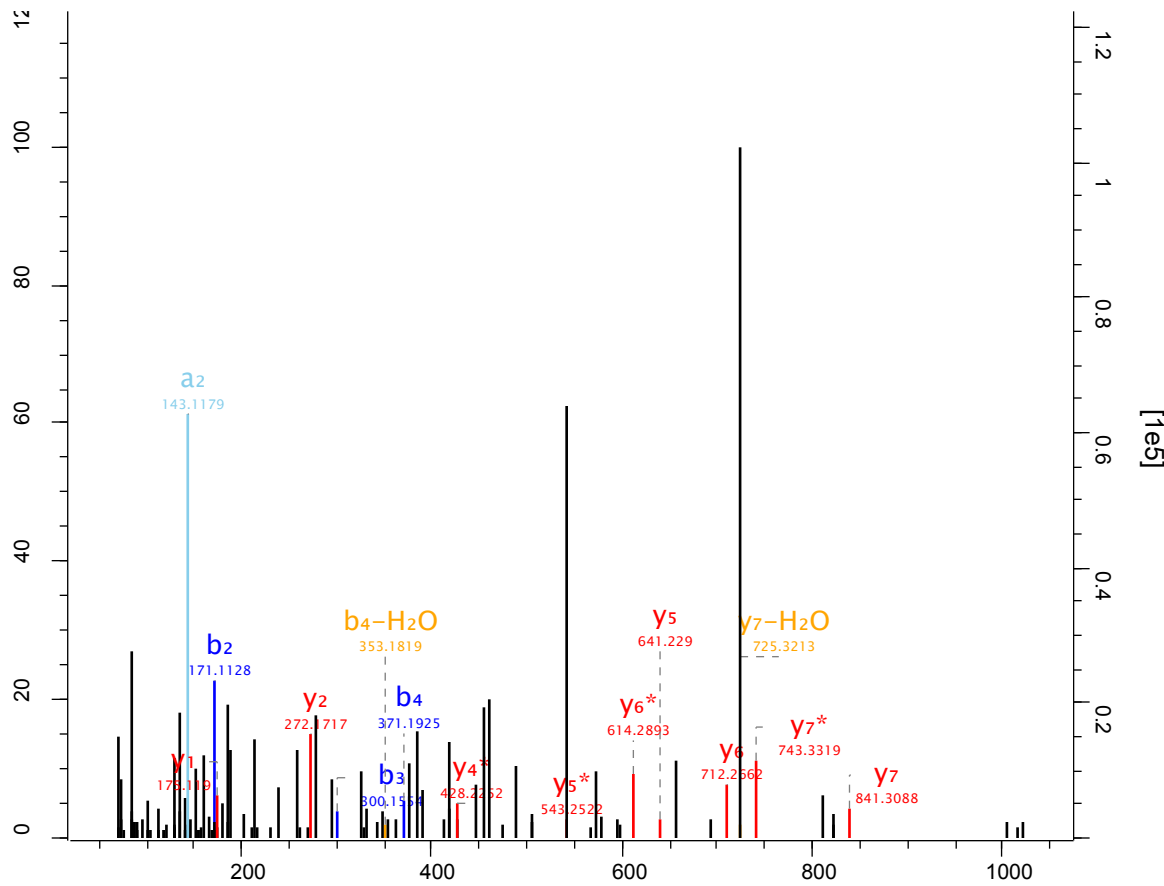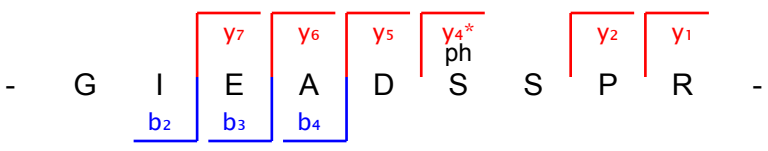

Raw file Scan Method Score m/z  
 Recip\_2\_38\_45 31586 FTMS; HCD 66.02 1124.97

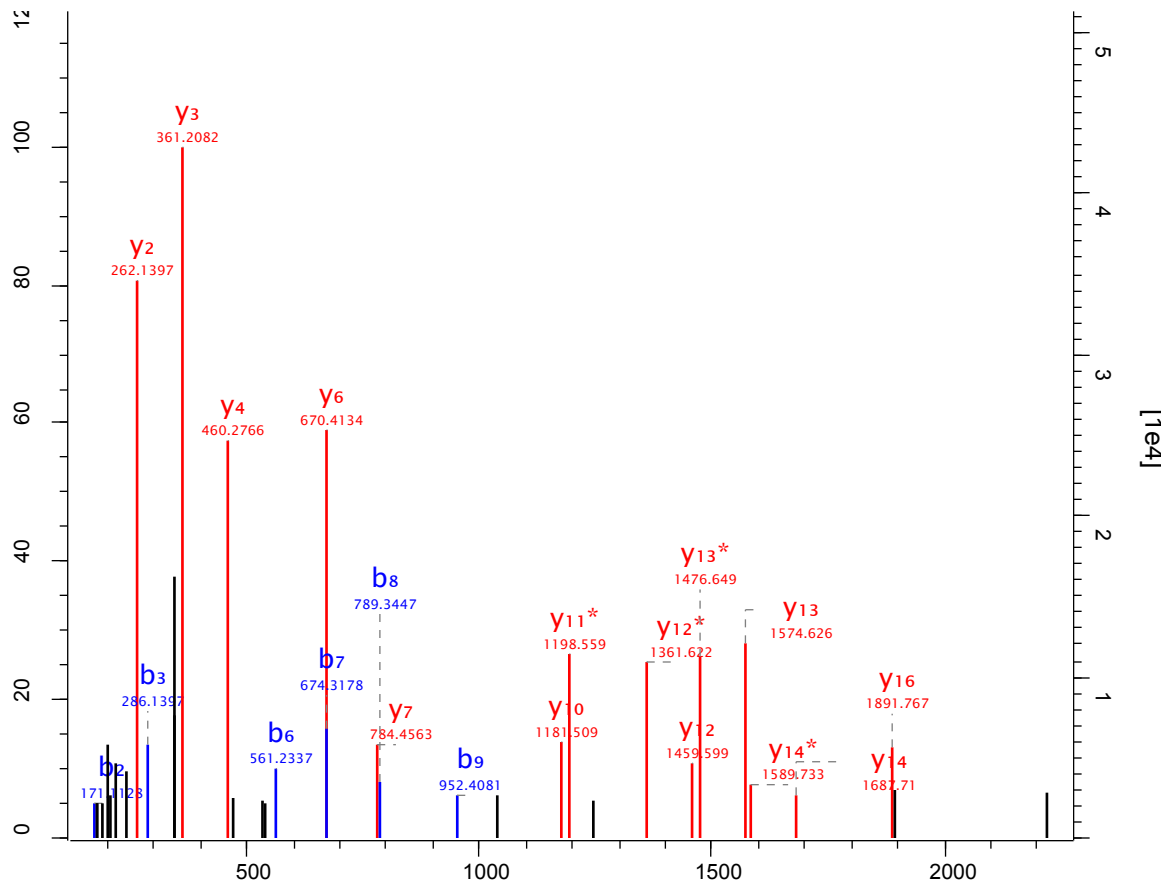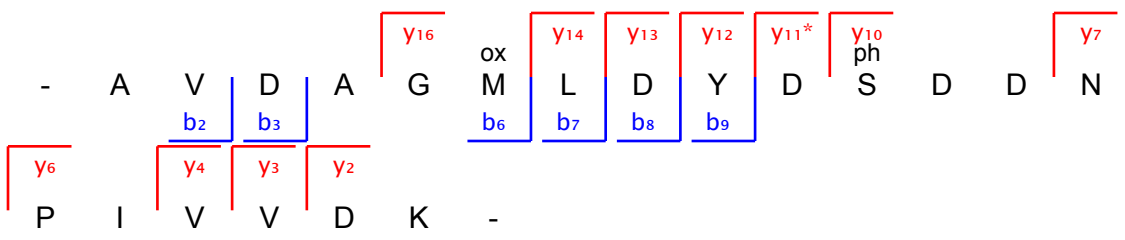



Raw file Scan Method Score m/z  
 Recip\_2\_38\_45 31590 FTMS; HCD 59.36 784

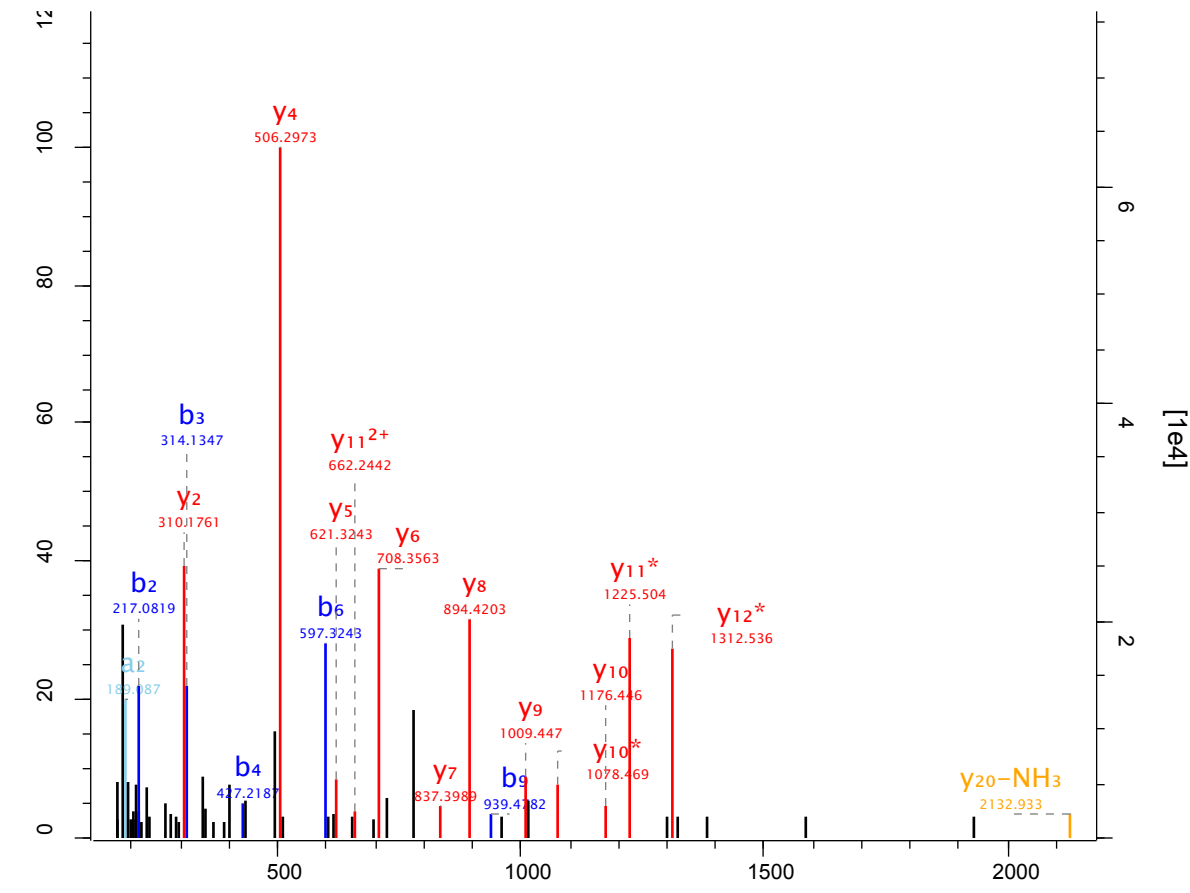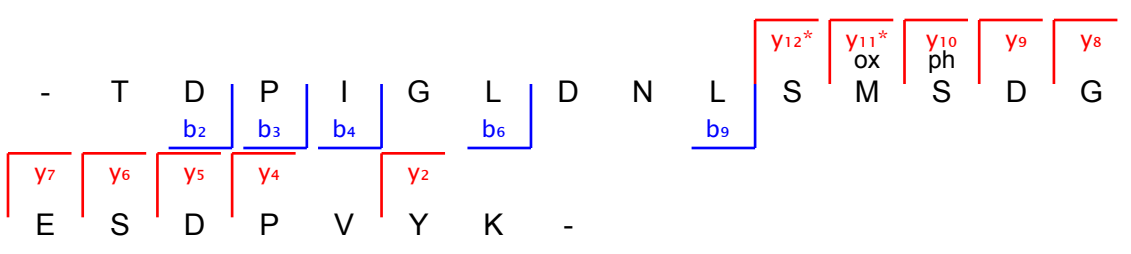

Raw file Scan Method Score m/z  
 Recip\_2\_38\_45 31902 FTMS; HCD 211.75 714.78

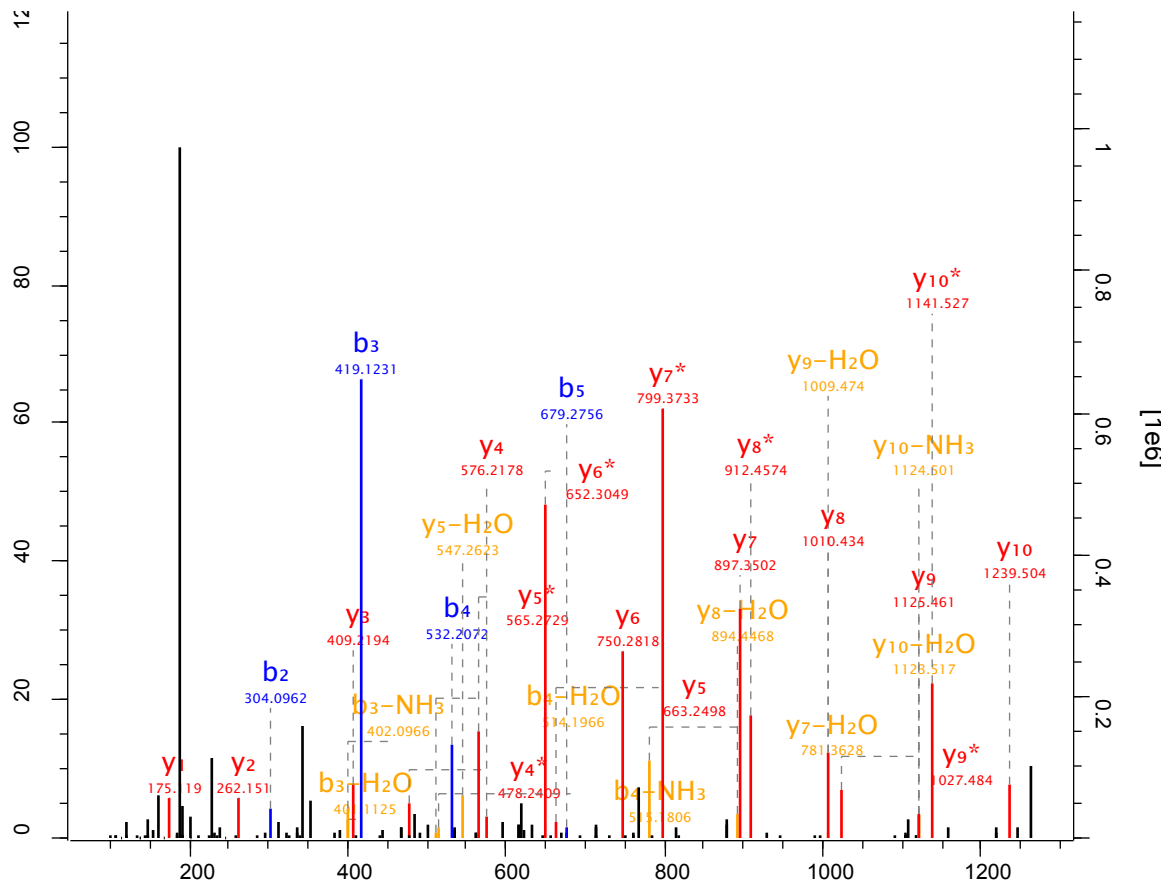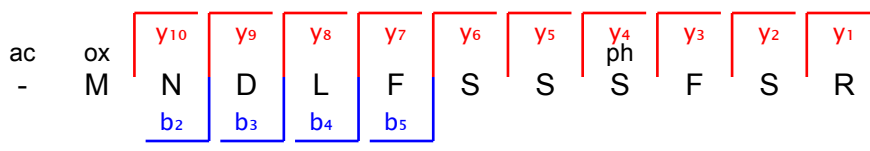

Raw file Scan Method Score m/z  
 Recip\_2\_38\_45 3380 FTMS; HCD 164.48 540.25

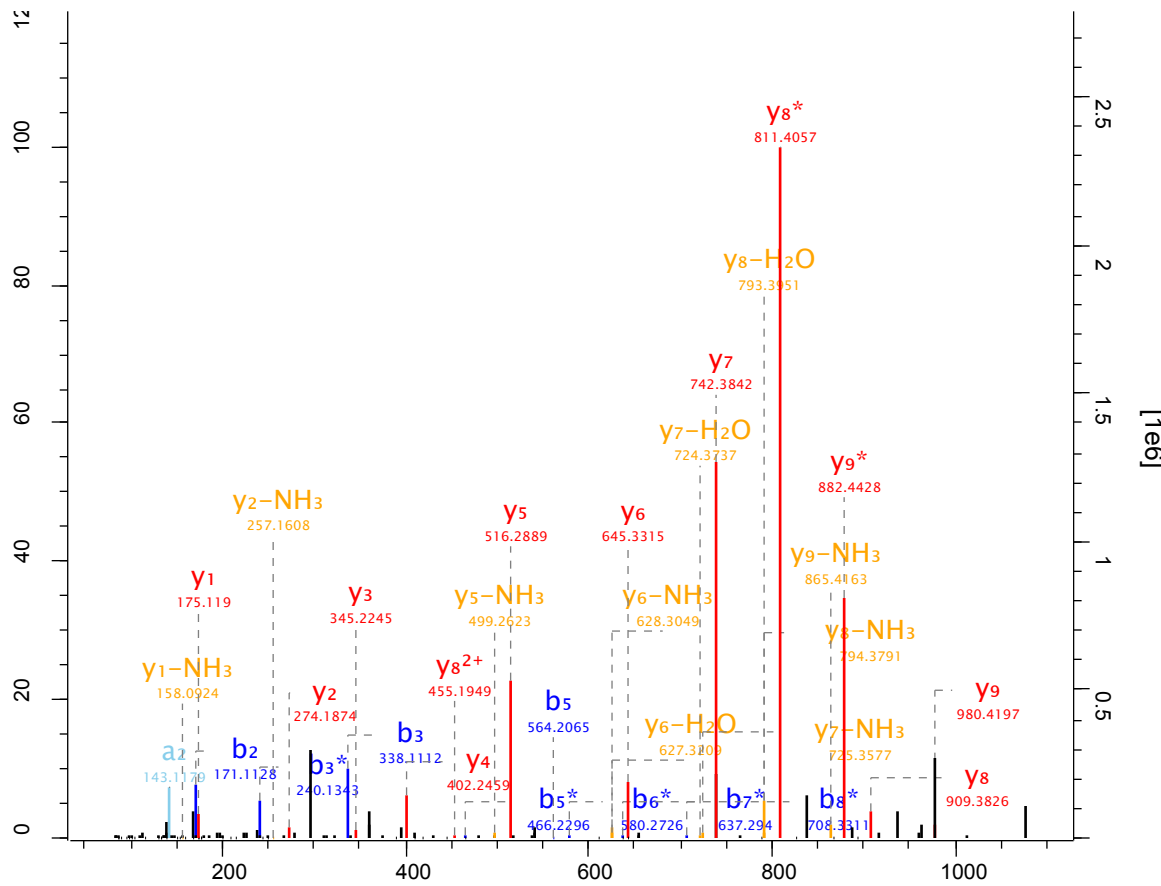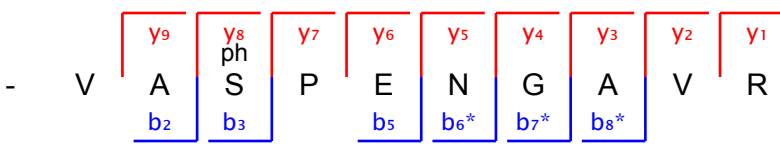

Raw file Scan Method Score m/z  
 Recip\_2\_38\_45 3453 FTMS; HCD 130.1 479.22

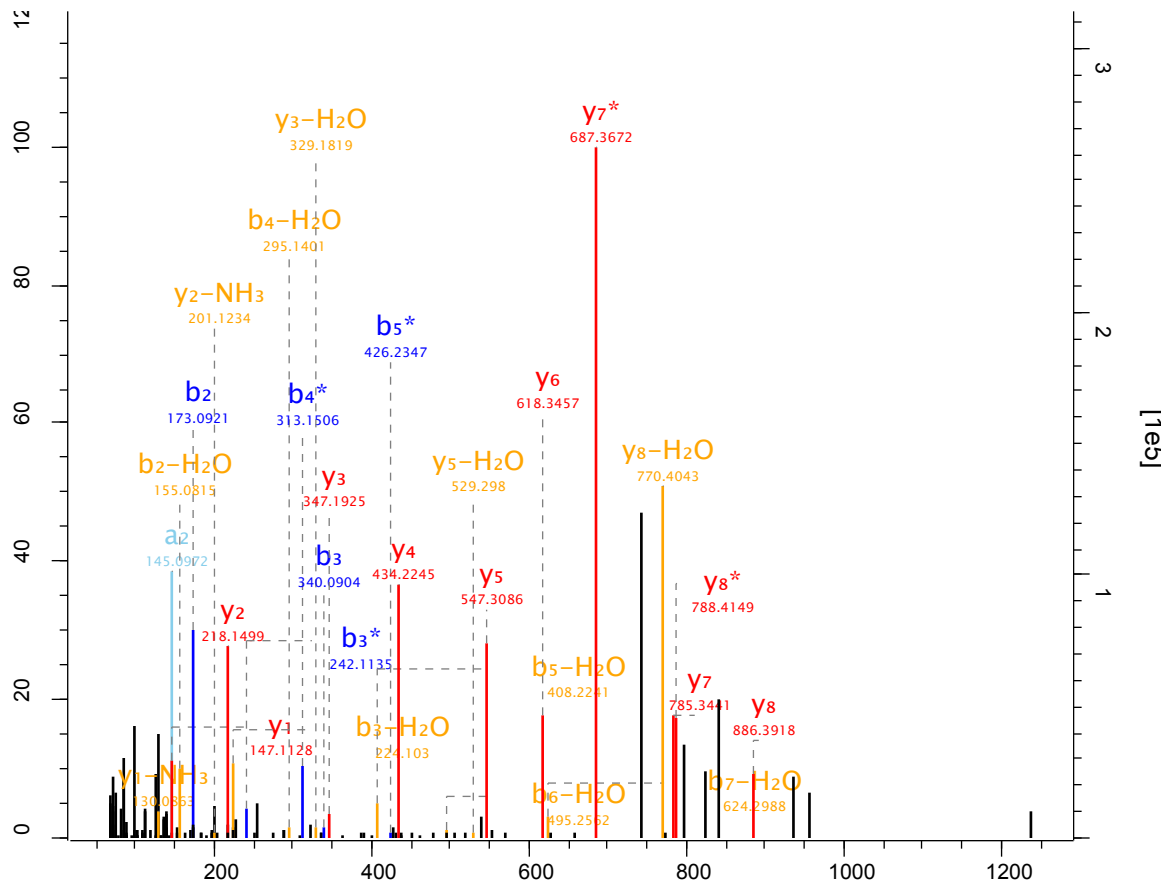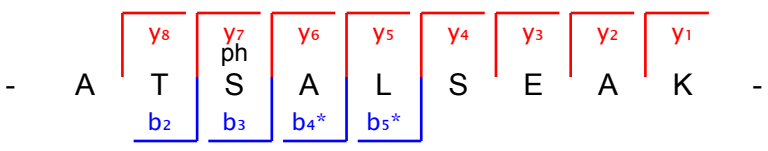

Raw file Scan Method Score m/z  
 Recip\_2\_38\_45 3464 FTMS; HCD 159.26 727.32

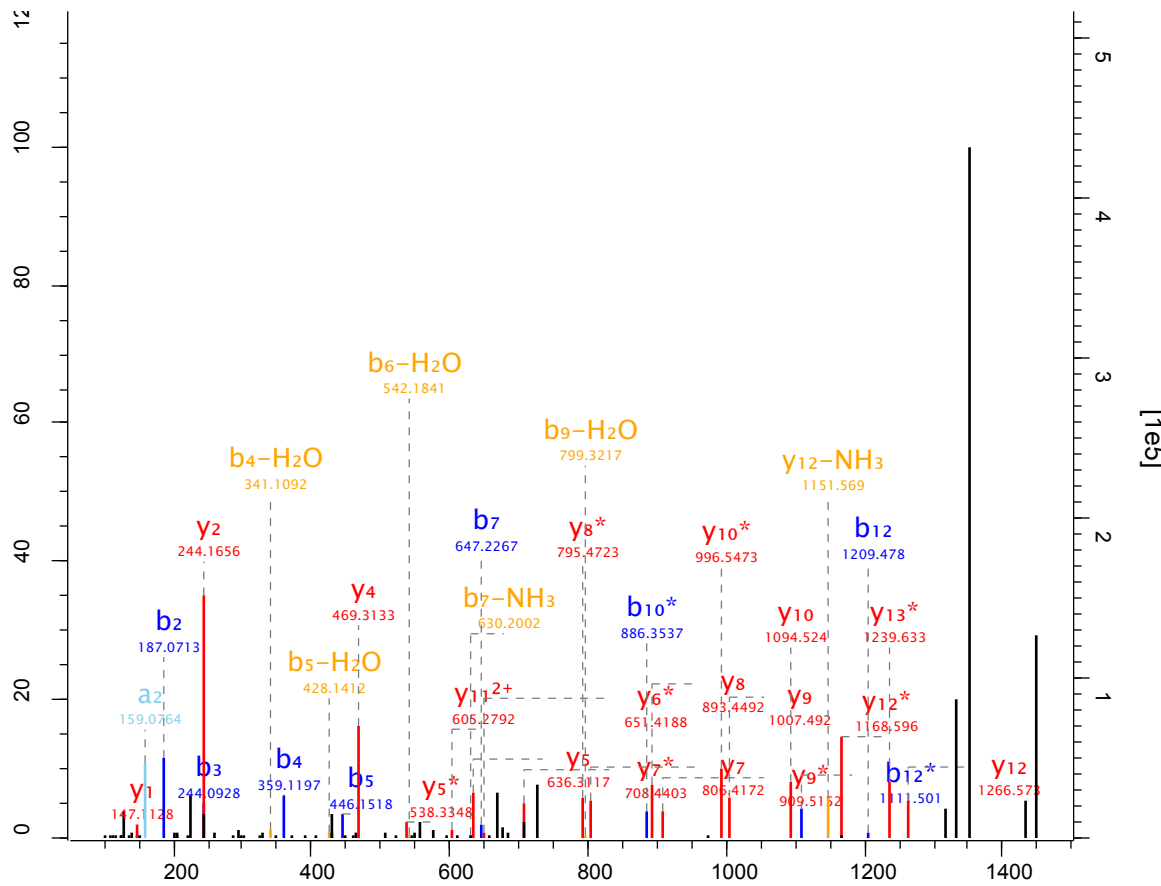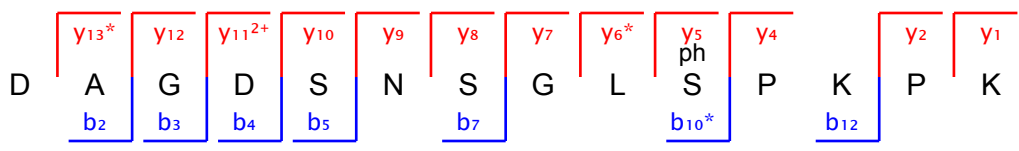

Raw file Scan Method Score m/z  
 Recip\_2\_38\_45 3896 FTMS; HCD 90.71 493.19

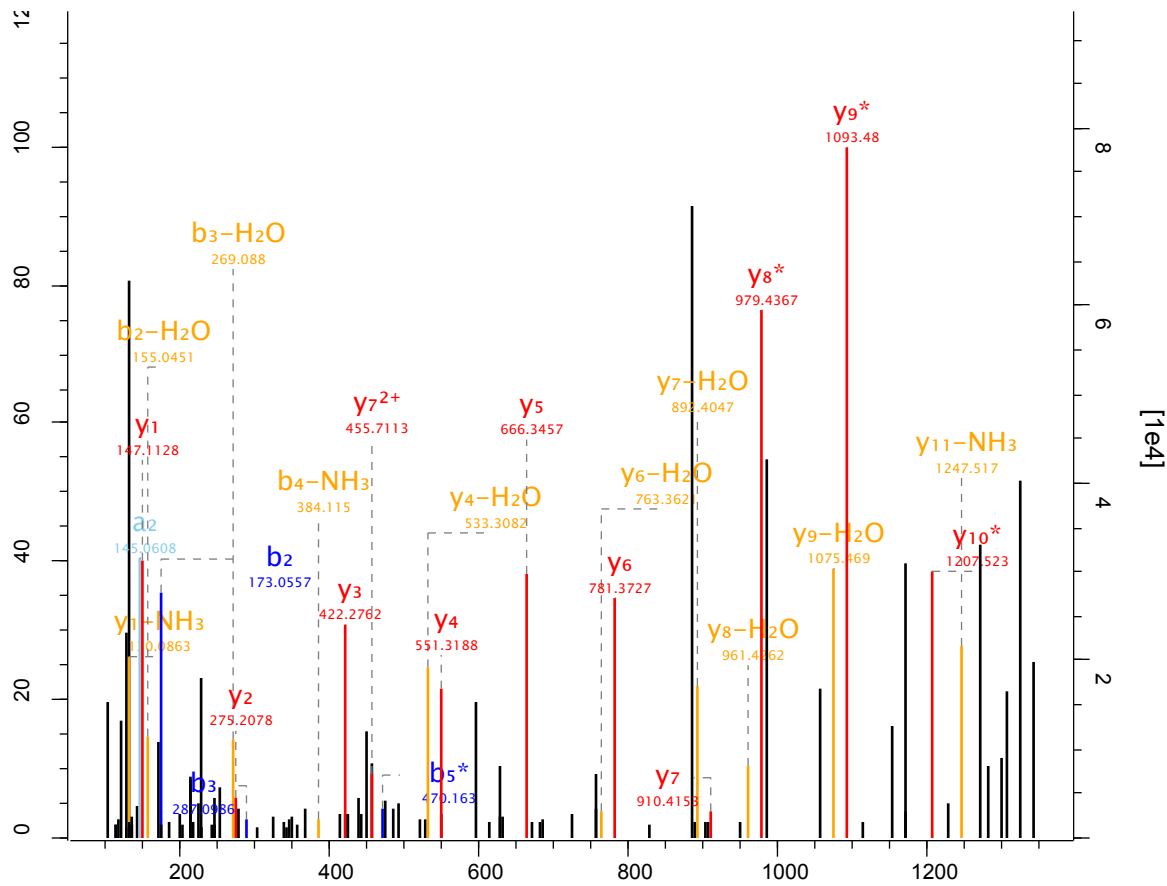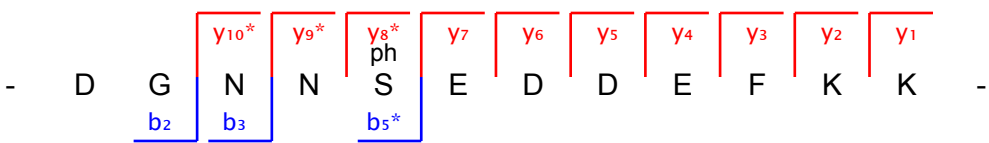

Raw file Scan Method Score m/z  
 Recip\_2\_38\_45 3937 FTMS; HCD 145.33 787.3

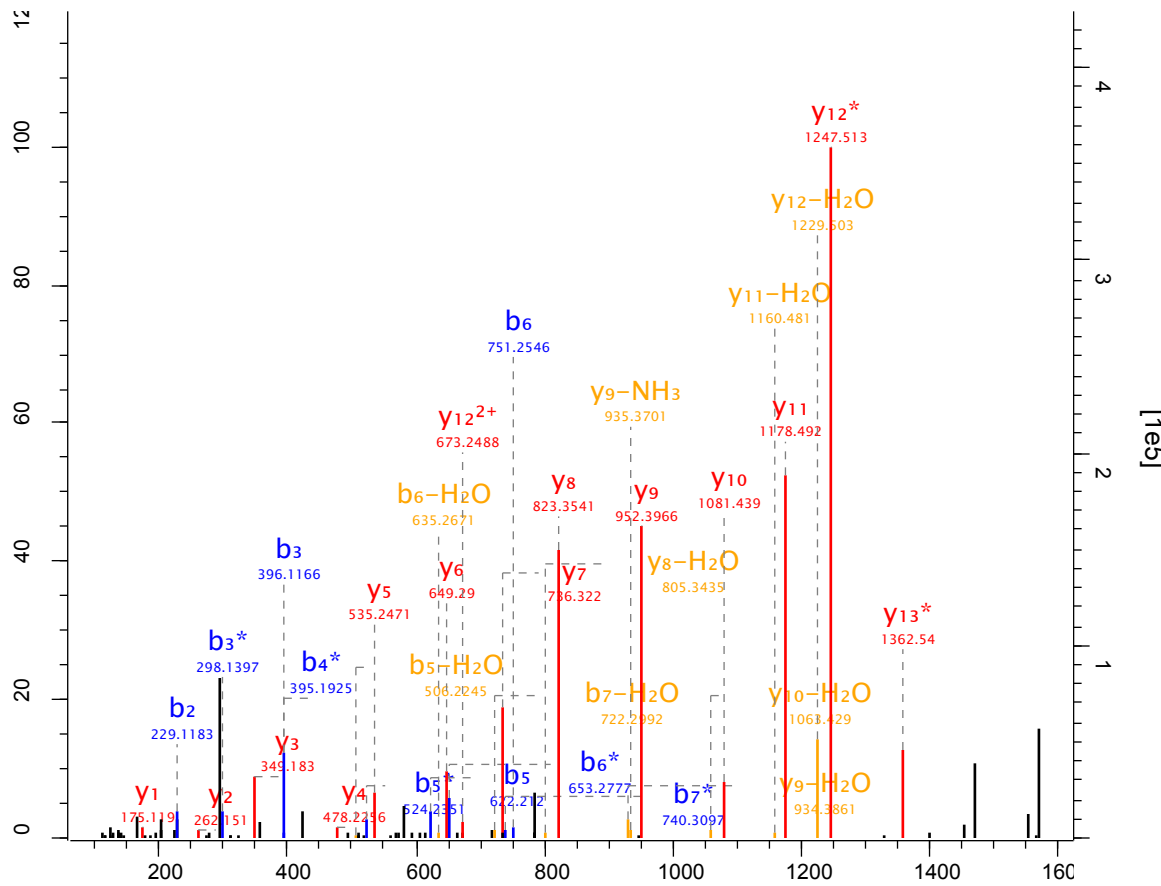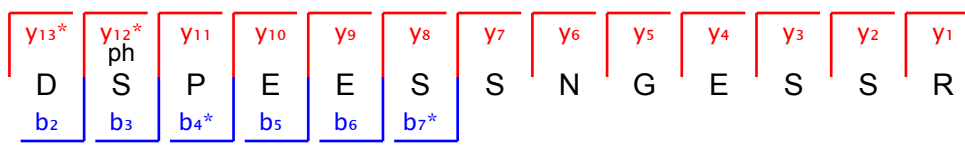

Raw file Scan Method Score m/z  
 Recip\_2\_38\_45 40339 FTMS; HCD 41.65 923.74

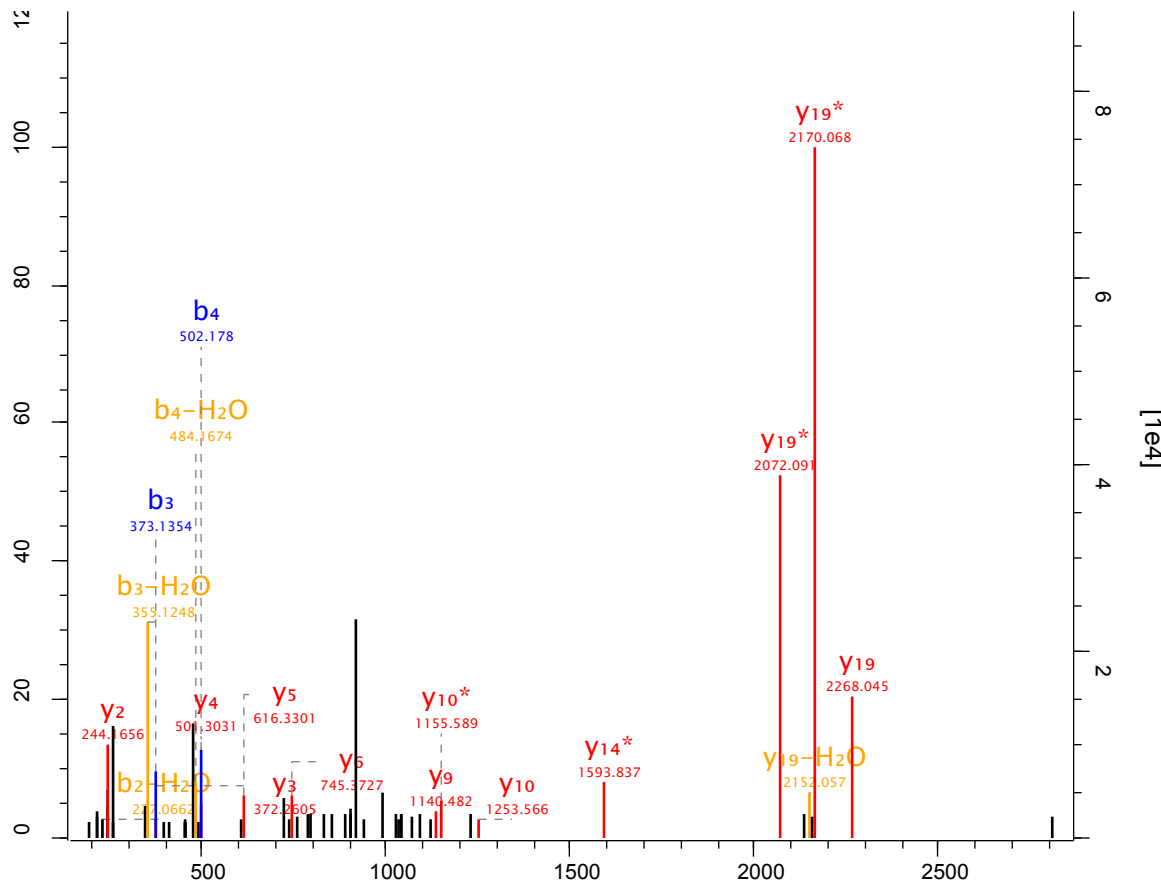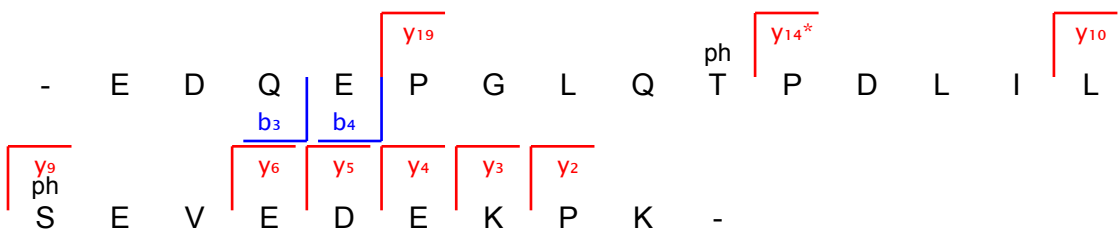



| Raw file      | Scan | Method    | Score  | m/z    |
|---------------|------|-----------|--------|--------|
| Recip_2_38_45 | 4074 | FTMS; HCD | 105.14 | 625.29 |

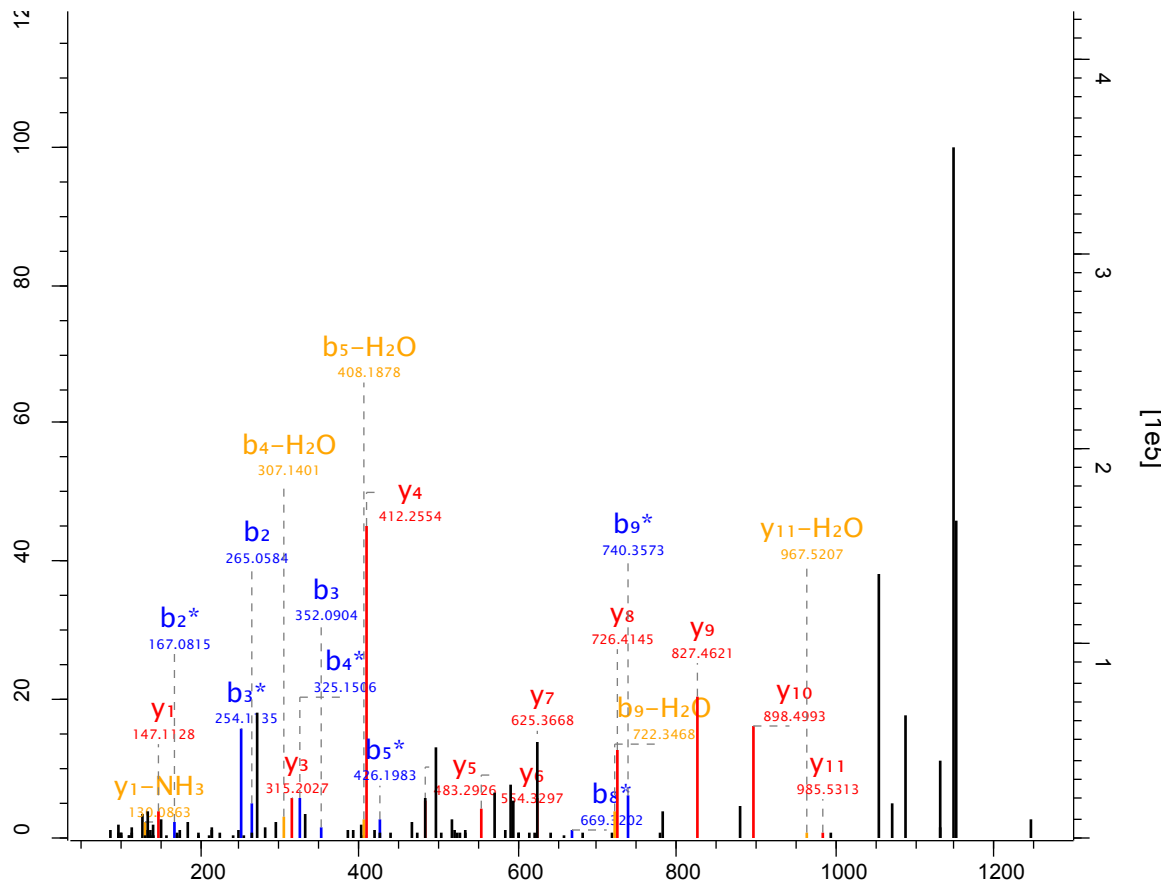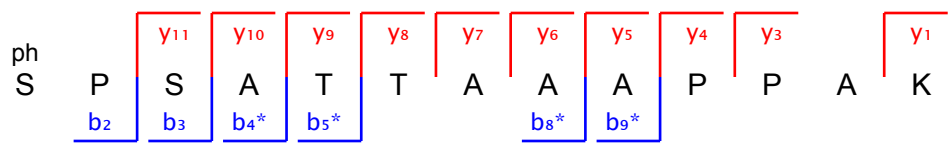

| Raw file      | Scan | Method    | Score | m/z    |
|---------------|------|-----------|-------|--------|
| Recip_2_38_45 | 4118 | FTMS; HCD | 68.66 | 514.22 |

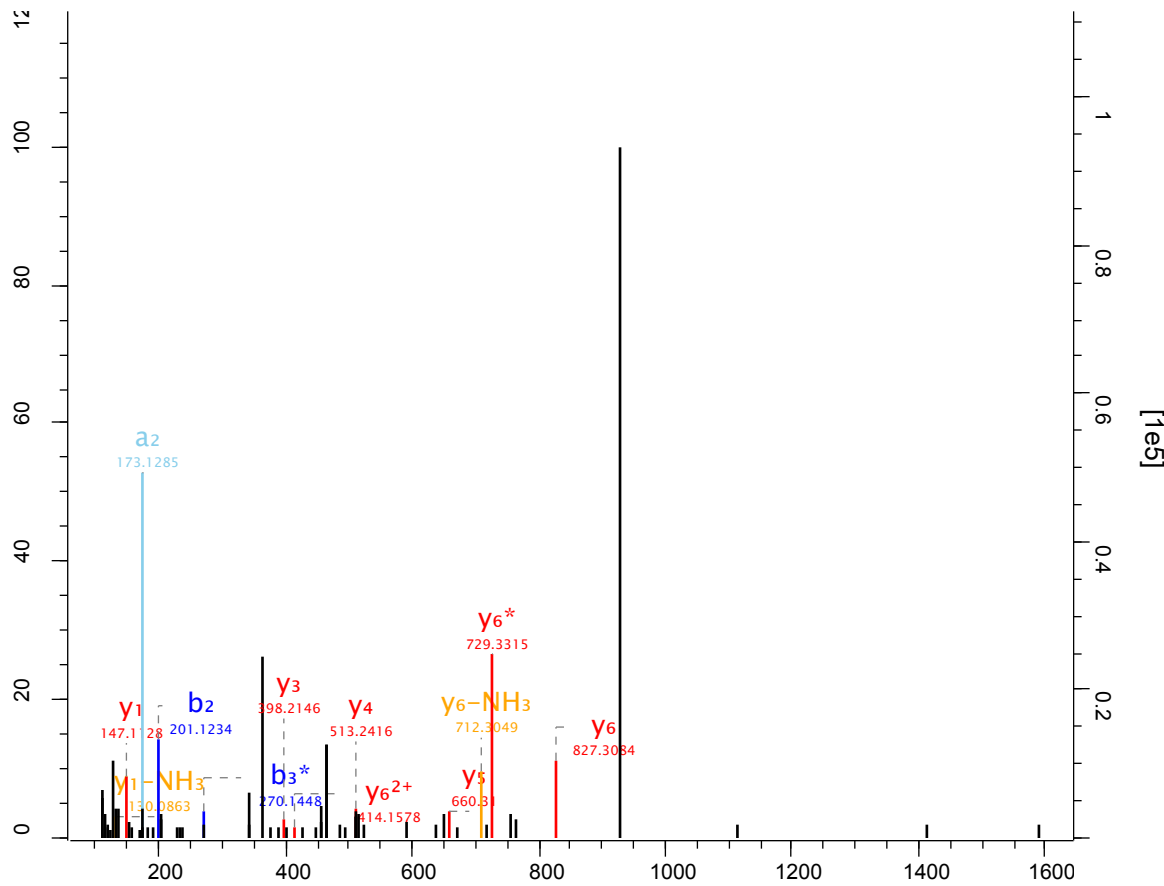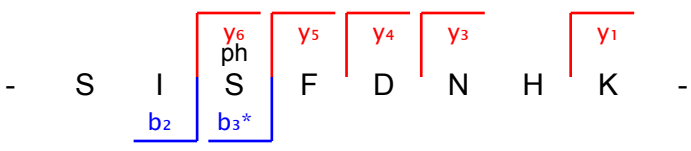

| Raw file      | Scan | Method    | Score | m/z    |
|---------------|------|-----------|-------|--------|
| Recip_2_38_45 | 4208 | FTMS; HCD | 42.32 | 655.27 |

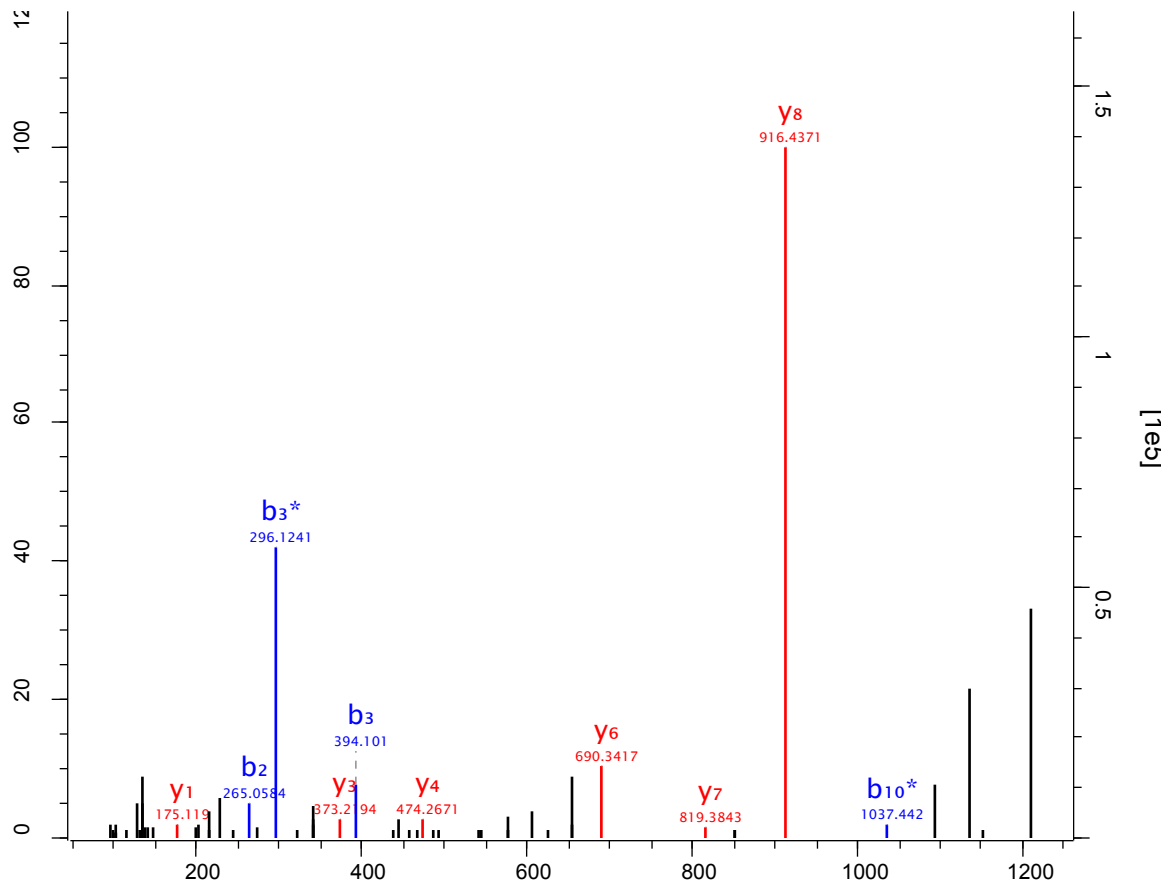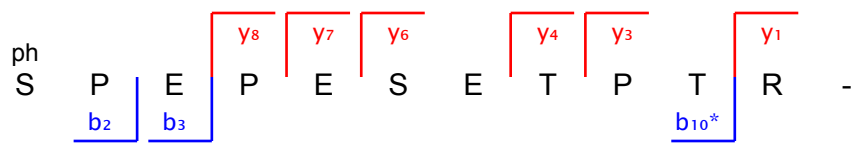

Raw file Scan Method Score m/z  
 Recip\_2\_38\_45 4405 FTMS; HCD 117 719.74

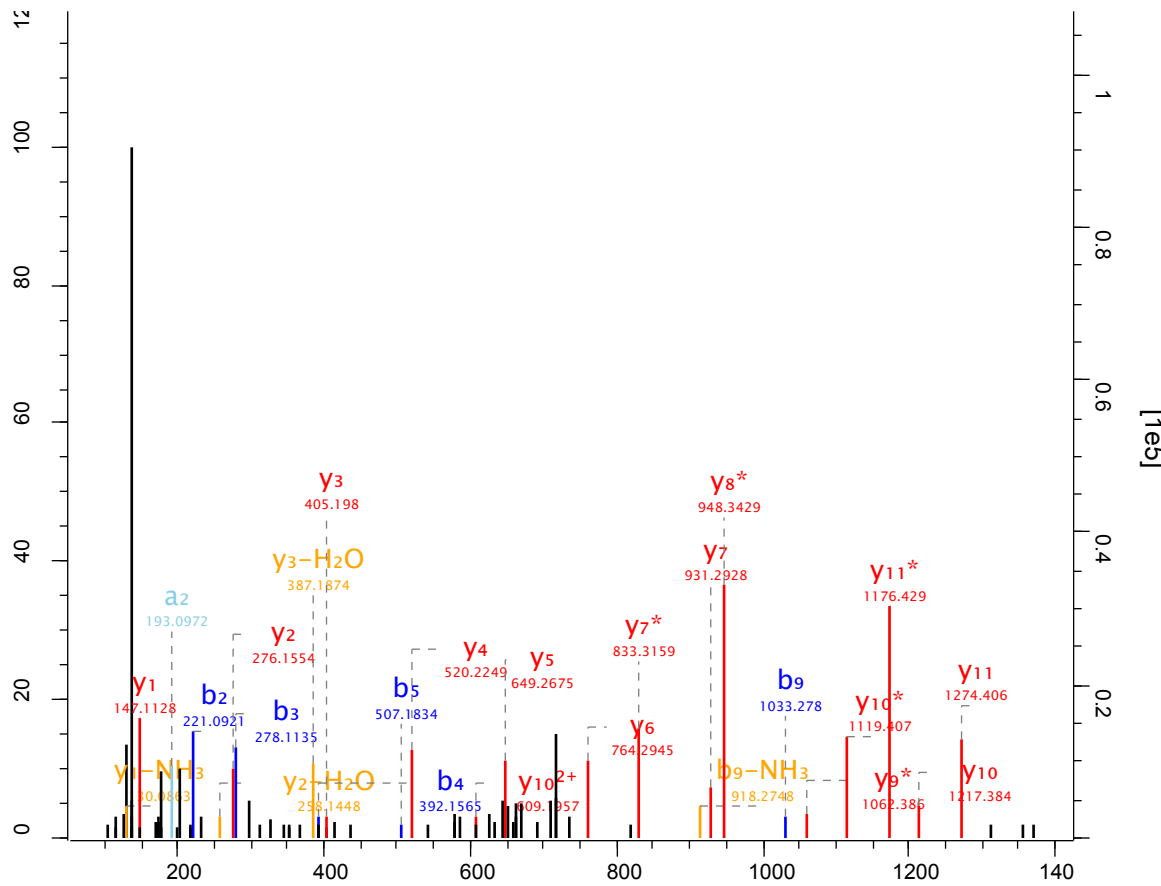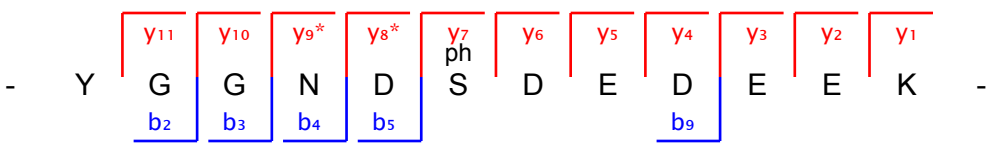

| Raw file      | Scan | Method    | Score | m/z    |
|---------------|------|-----------|-------|--------|
| Recip_2_38_45 | 4406 | FTMS; HCD | 47.04 | 548.27 |

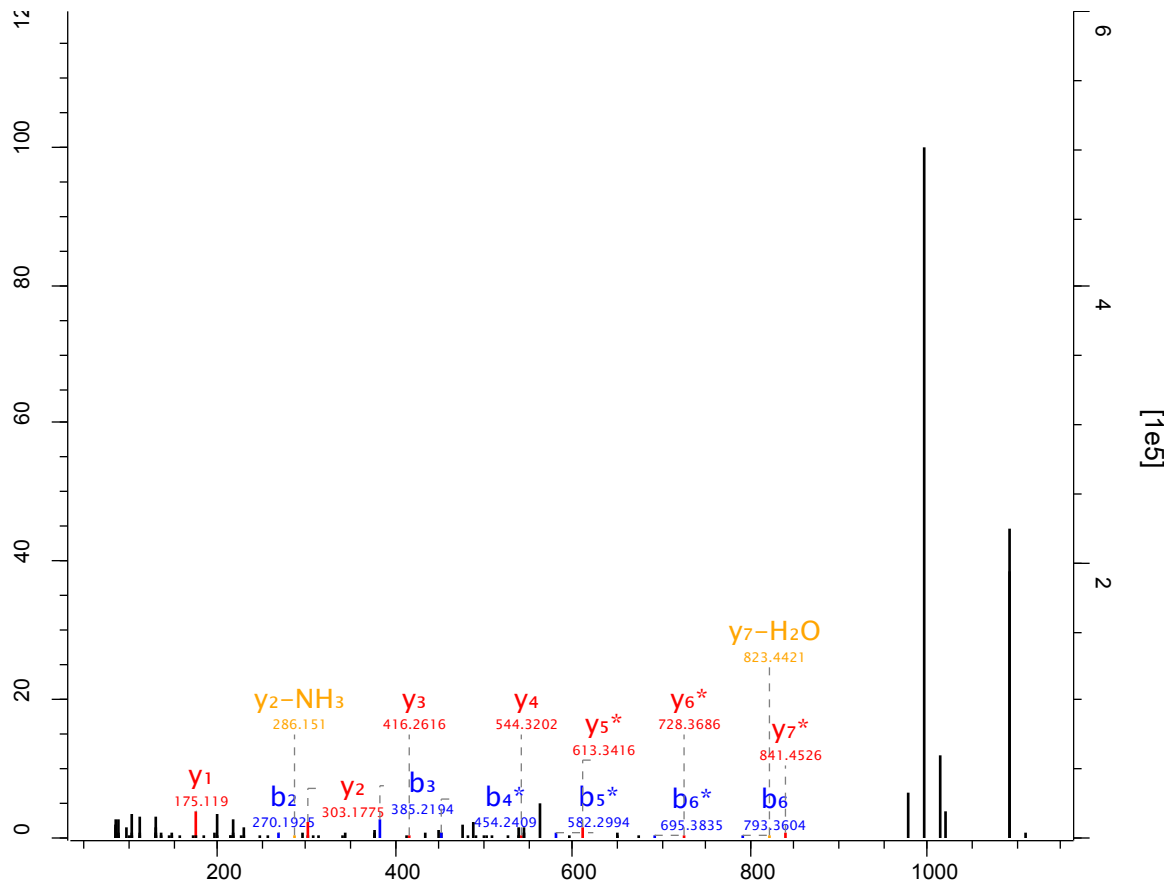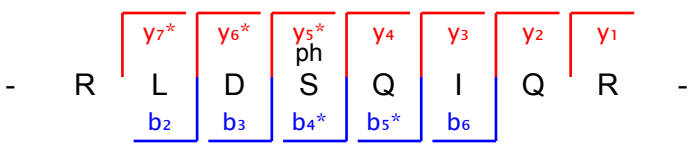

Raw file Scan Method Score m/z  
 Recip\_2\_38\_45 4867 FTMS; HCD 45.28 510.74

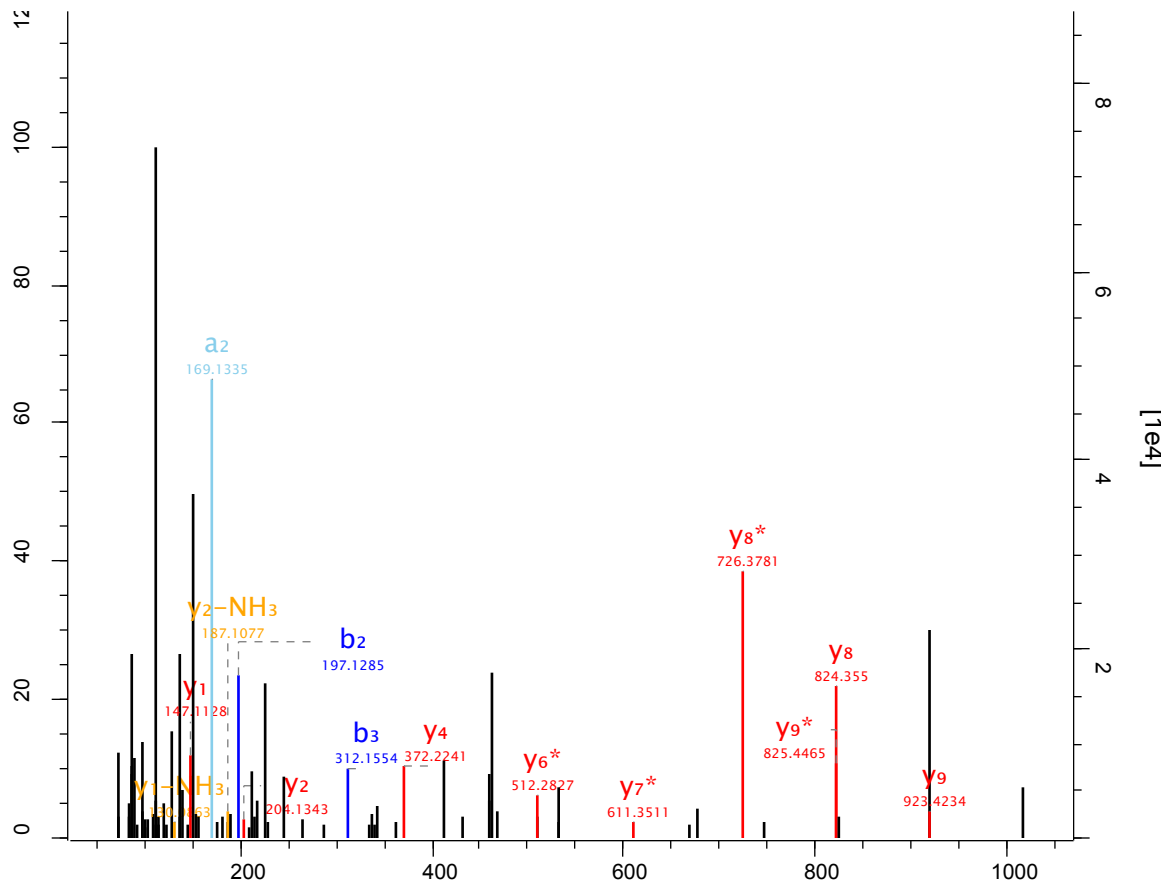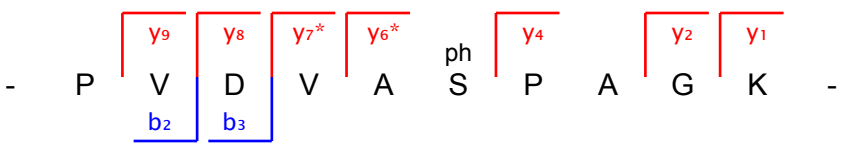

| Raw file      | Scan | Method    | Score  | m/z    |
|---------------|------|-----------|--------|--------|
| Recip_2_38_45 | 4870 | FTMS; HCD | 127.18 | 627.23 |

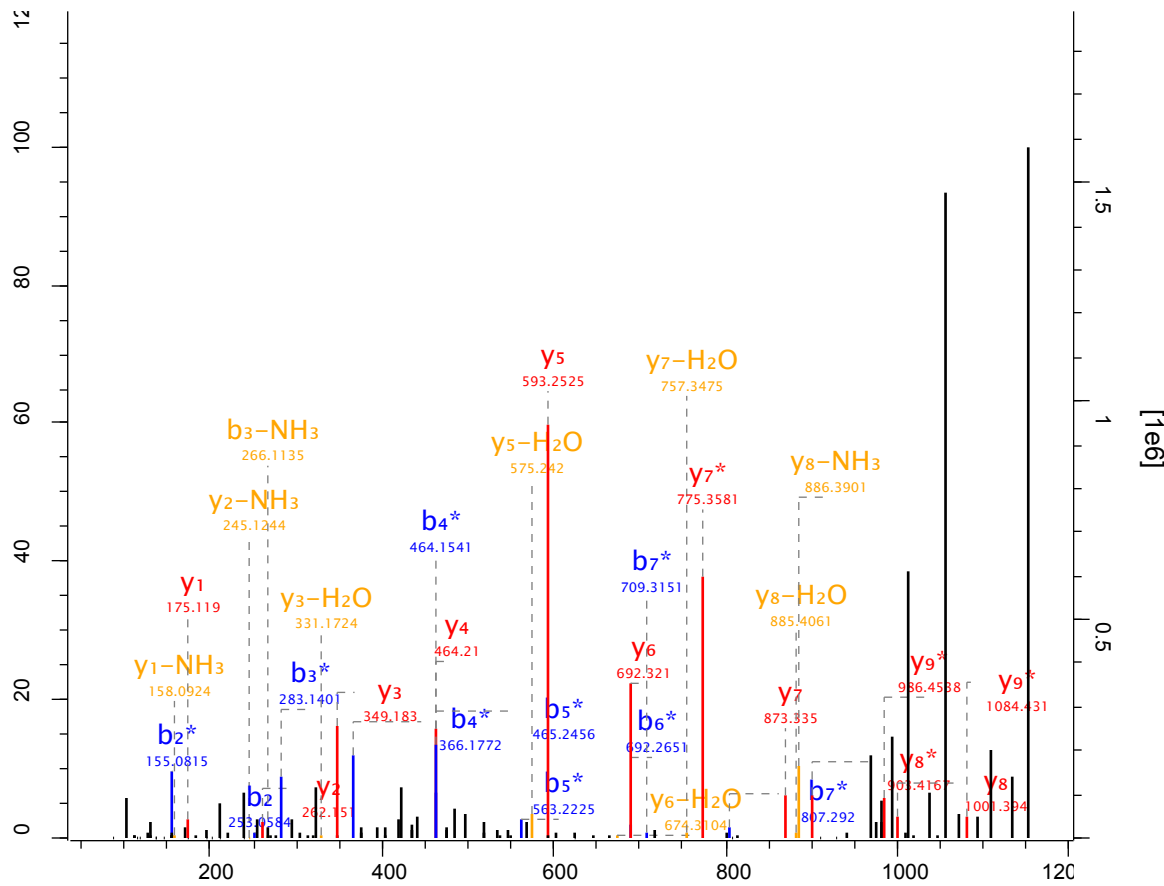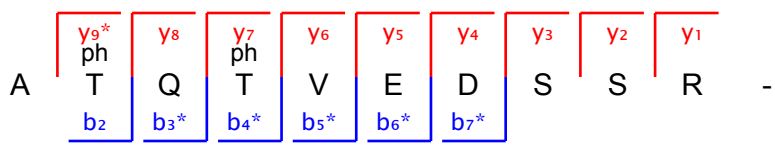

Raw file Scan Method Score m/z  
 Recip\_2\_38\_45 5009 FTMS; HCD 101.92 754.77

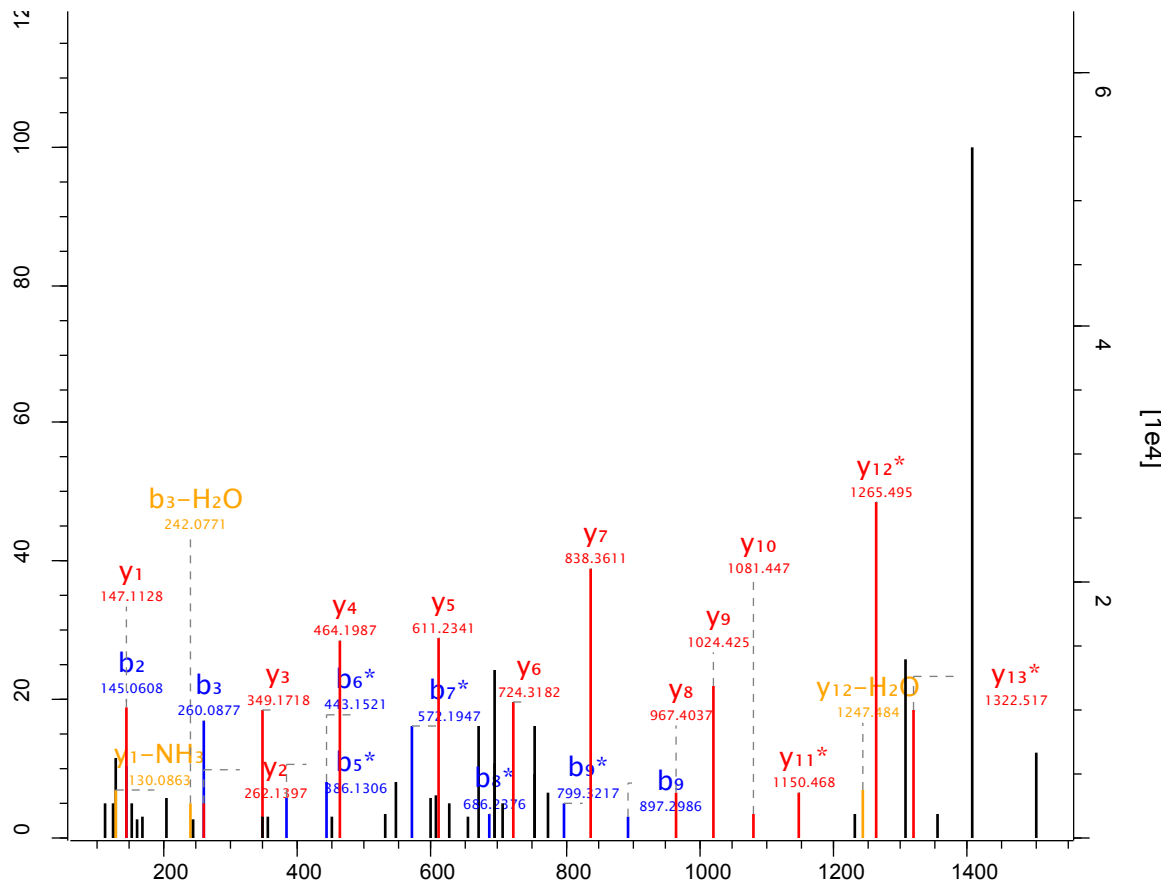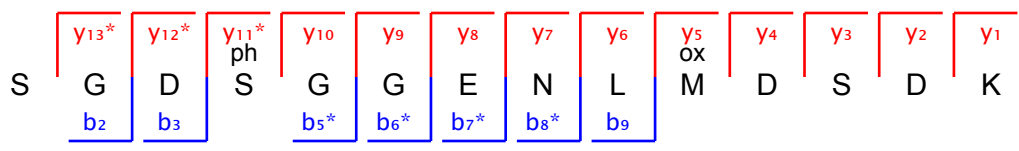



| Raw file      | Scan | Method    | Score | m/z    |
|---------------|------|-----------|-------|--------|
| Recip_2_38_45 | 5024 | FTMS; HCD | 60.4  | 469.72 |

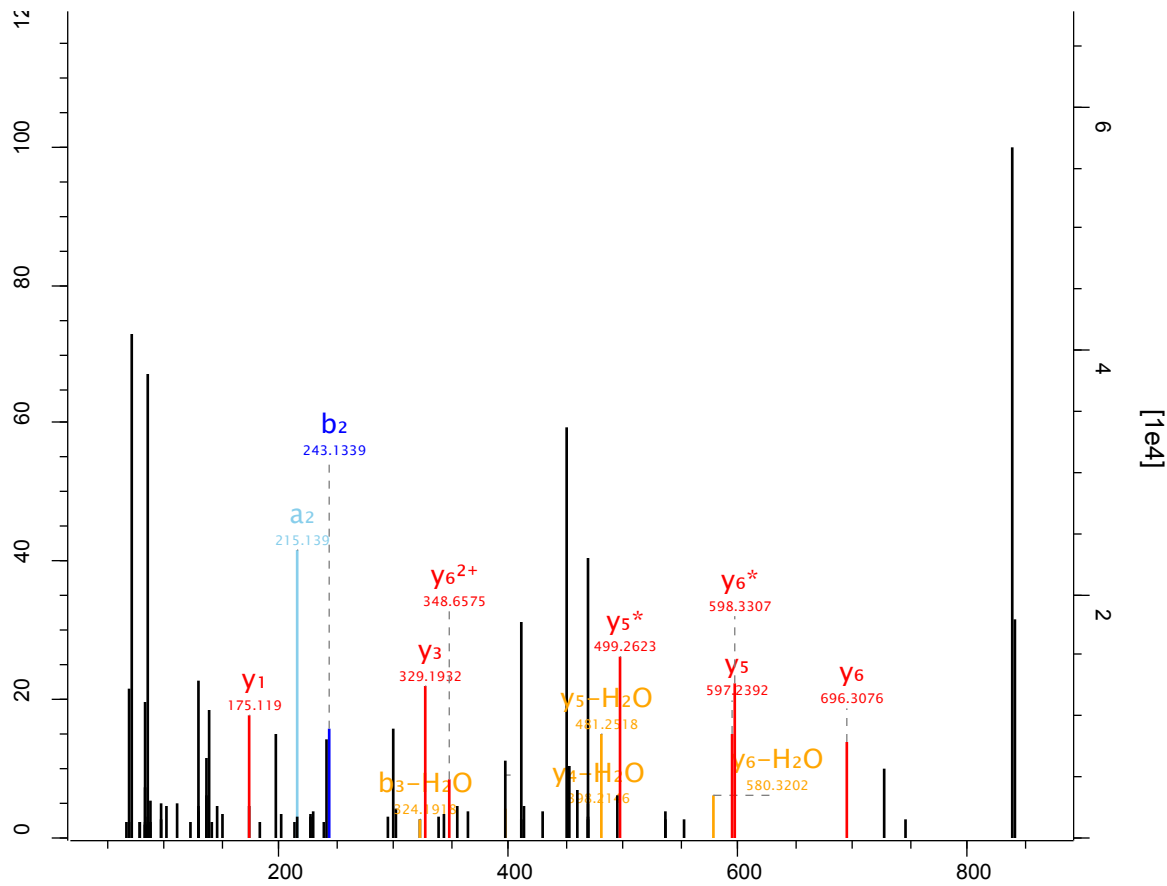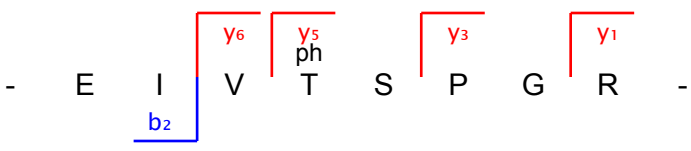

Raw file Scan Method Score m/z  
 Recip\_2\_38\_45 5247 FTMS; HCD 53.45 555.21

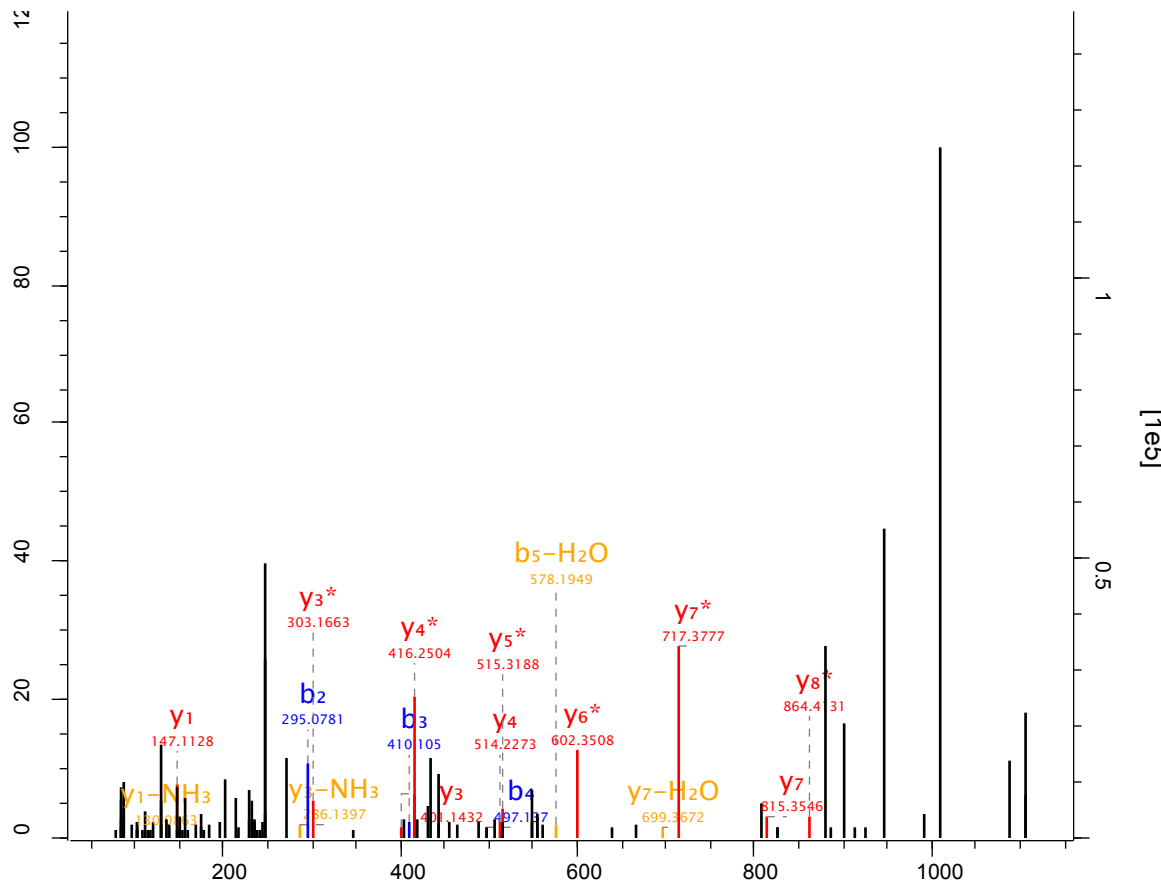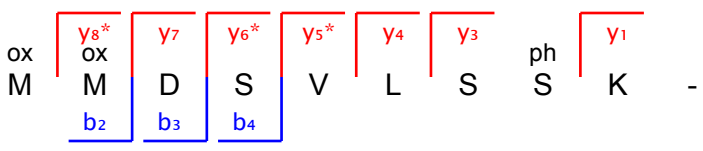

| Raw file      | Scan | Method    | Score | m/z   |
|---------------|------|-----------|-------|-------|
| Recip_2_38_45 | 5321 | FTMS; HCD | 50.09 | 701.8 |

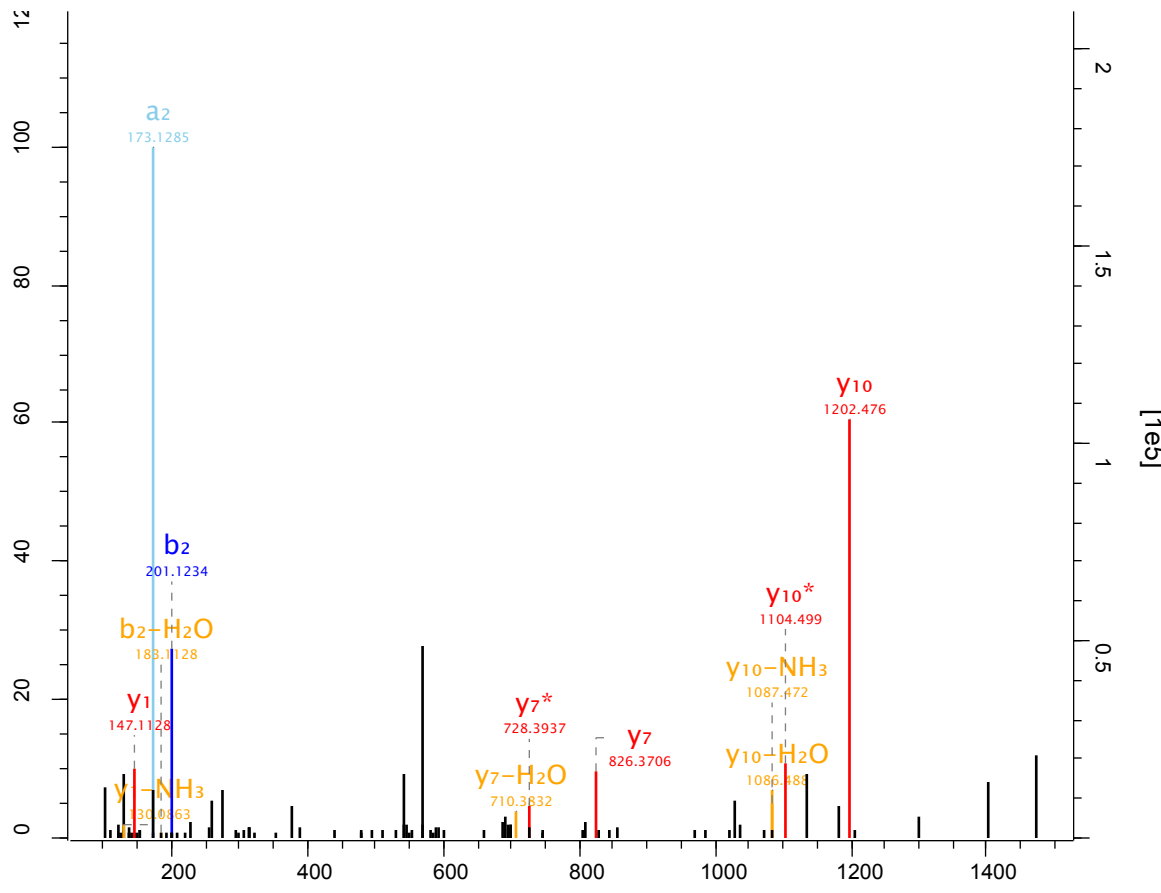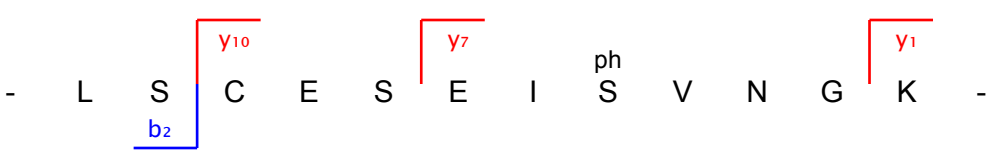

Raw file Scan Method Score m/z  
 Recip\_2\_38\_45 5367 FTMS; HCD 78.19 658.77

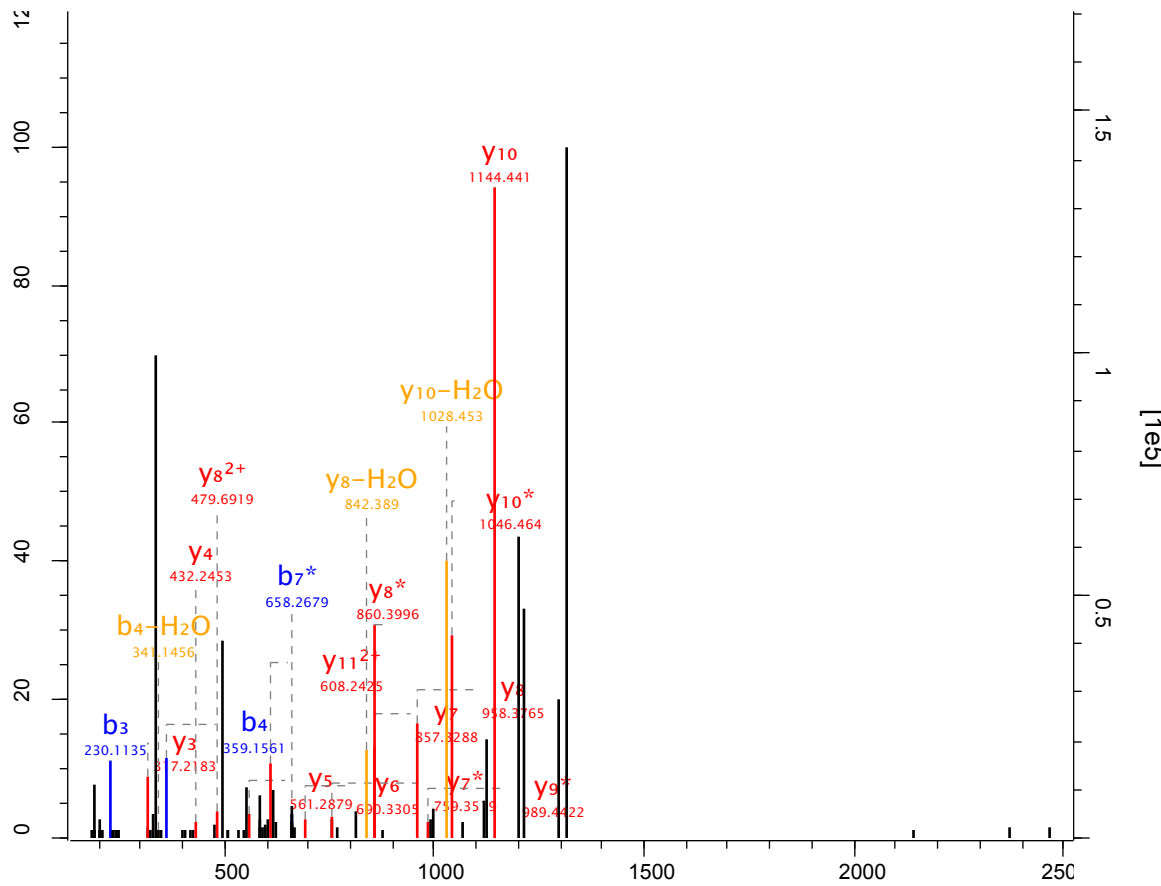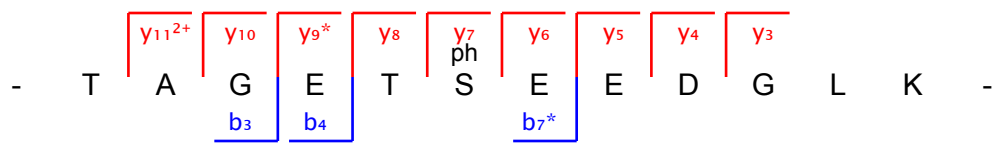

| Raw file      | Scan | Method    | Score | m/z    |
|---------------|------|-----------|-------|--------|
| Recip_2_38_45 | 5437 | FTMS; HCD | 47.74 | 442.71 |

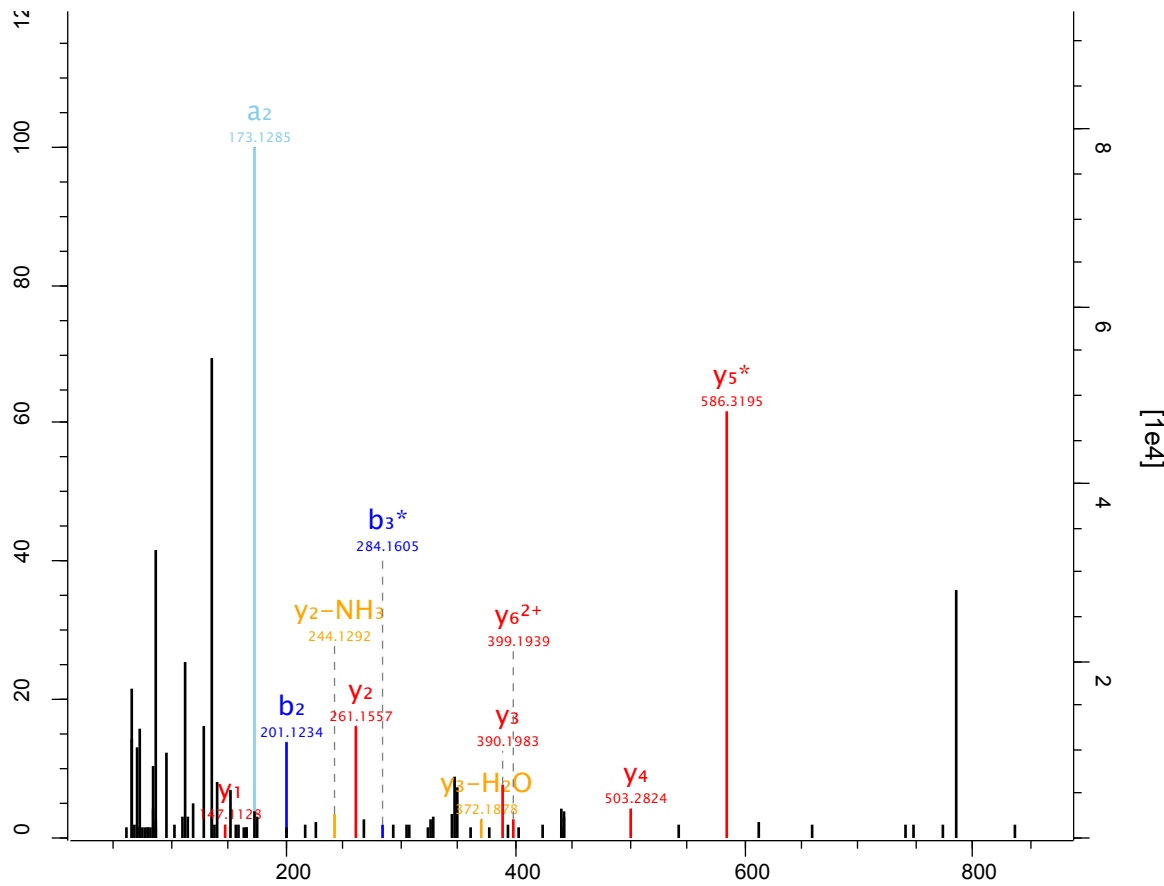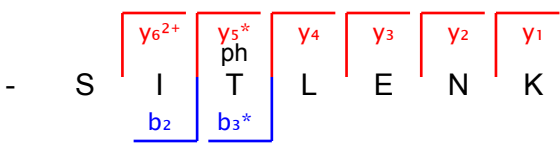

Raw file Scan Method Score m/z  
 Recip\_2\_38\_45 5776 FTMS; HCD 181.98 600.78

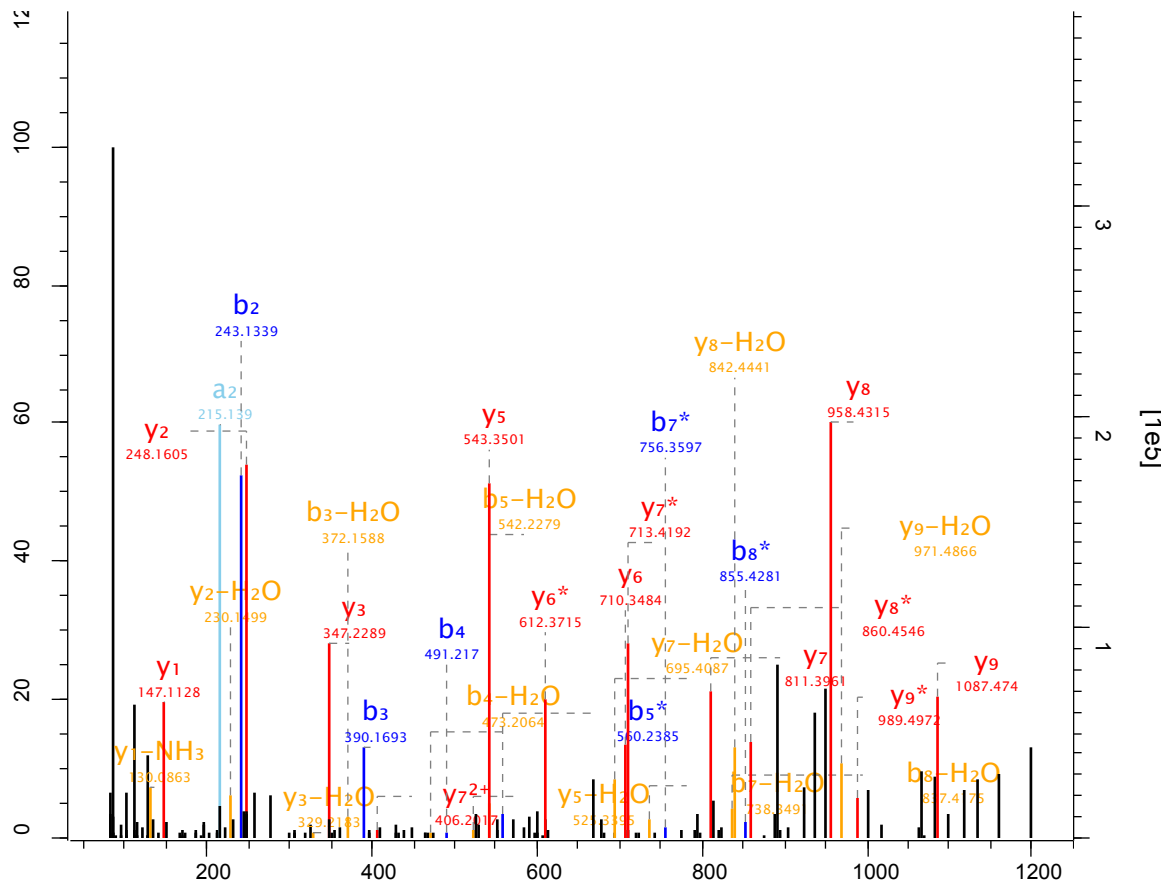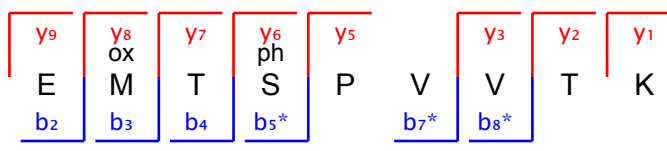

Raw file Scan Method Score m/z  
 Recip\_2\_38\_45 5825 FTMS; HCD 130.37 837.36

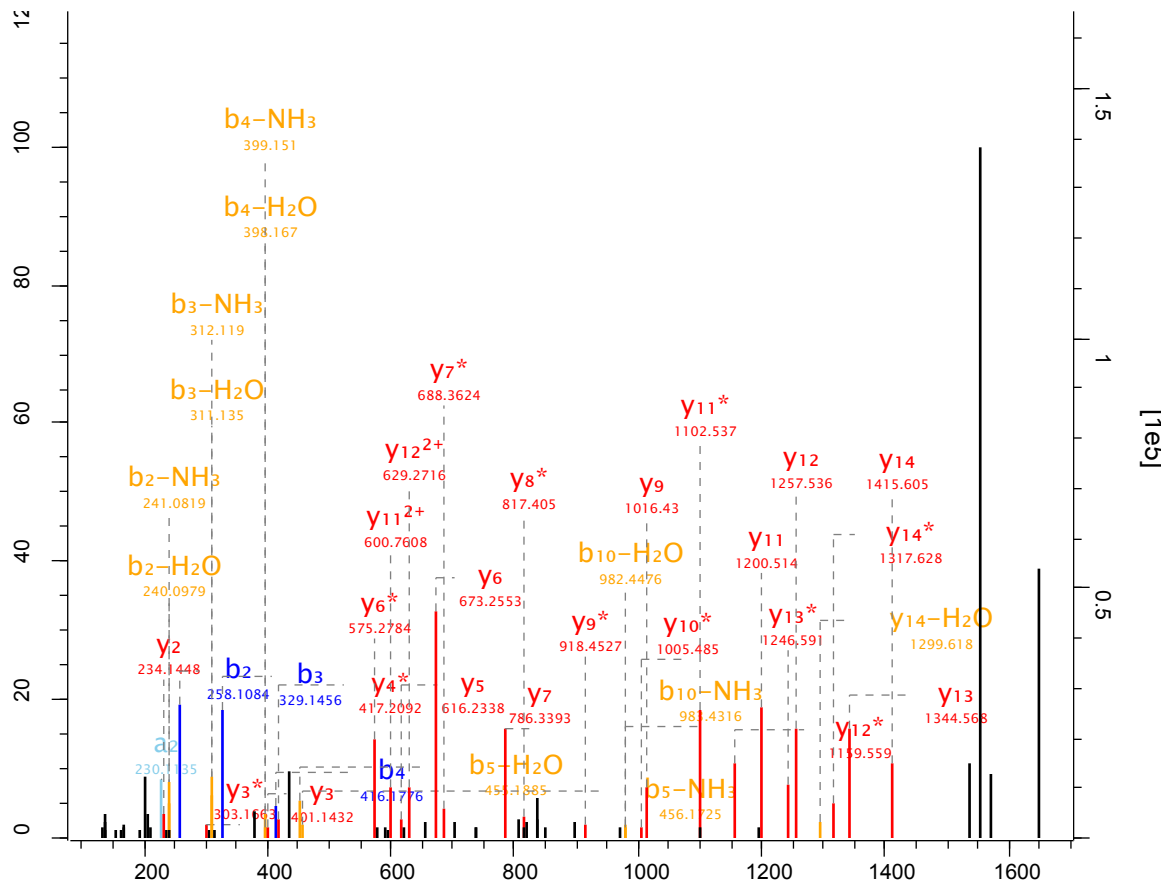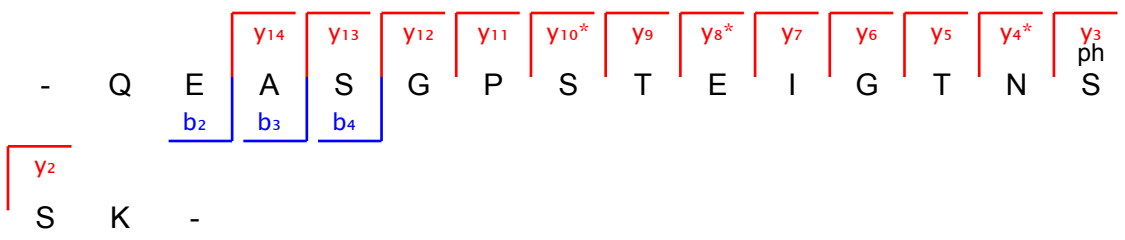

| Raw file      | Scan | Method    | Score | m/z   |
|---------------|------|-----------|-------|-------|
| Recip_2_38_45 | 5961 | FTMS; HCD | 78.69 | 736.3 |

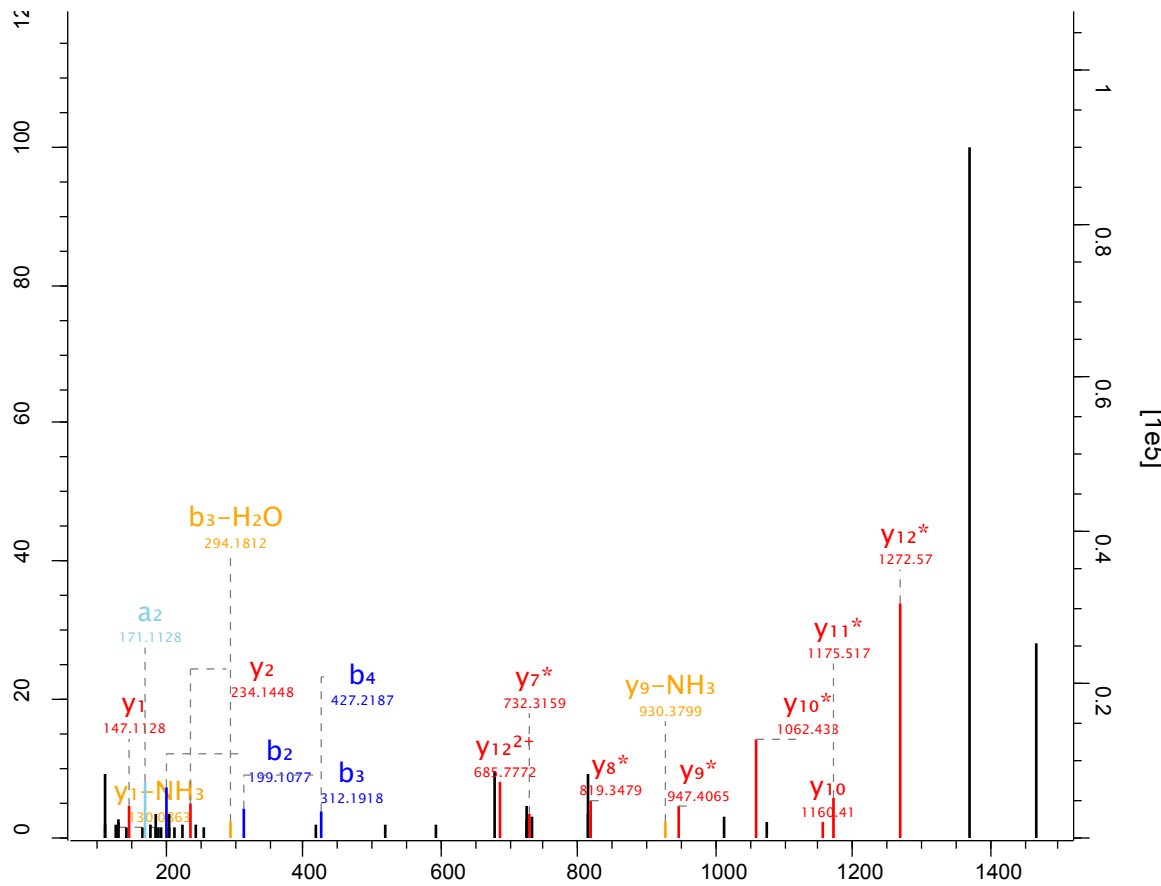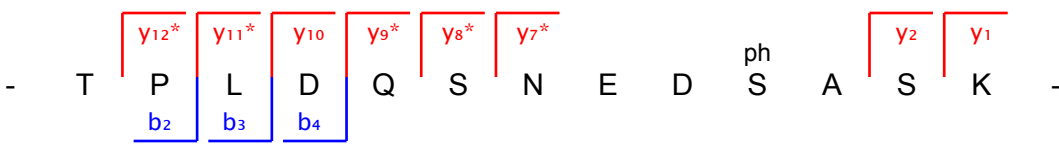



Raw file Scan Method Score m/z  
 Recip\_2\_38\_45 6511 FTMS; HCD 148.1 828.99

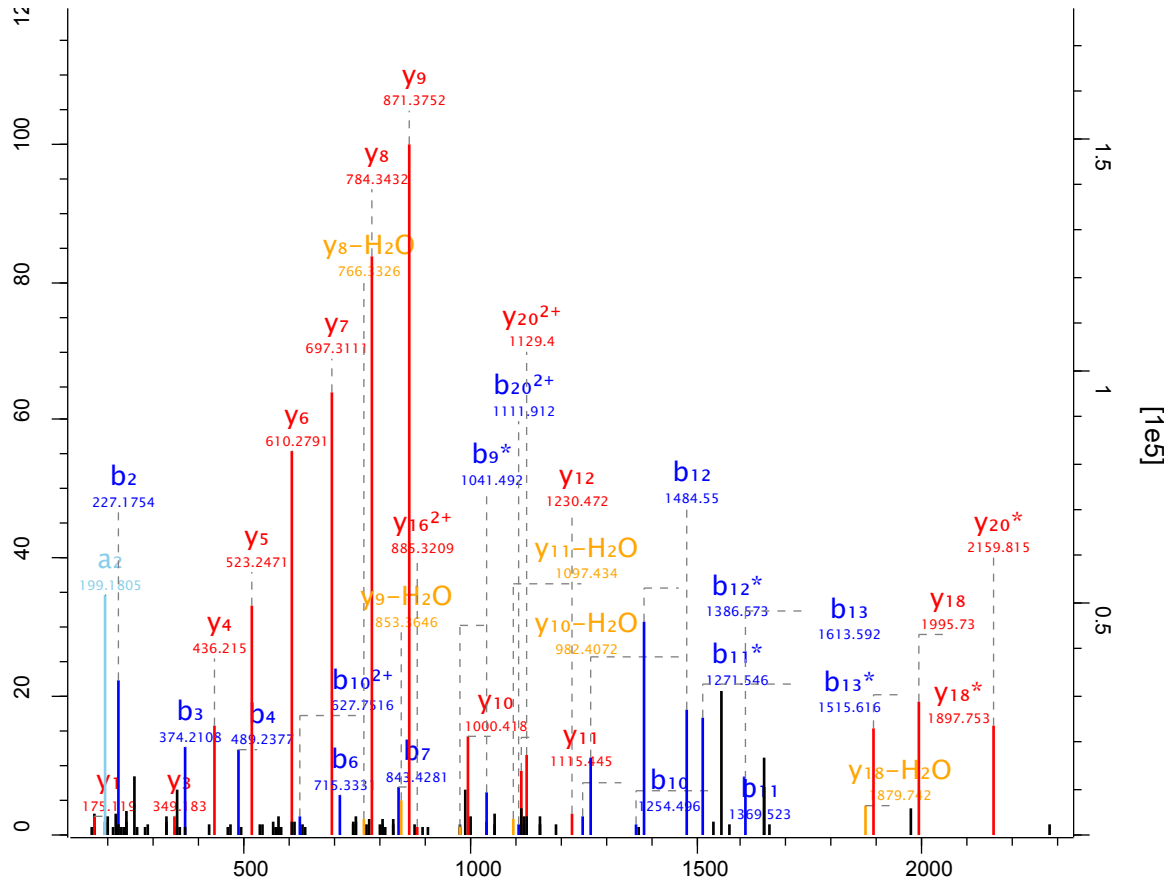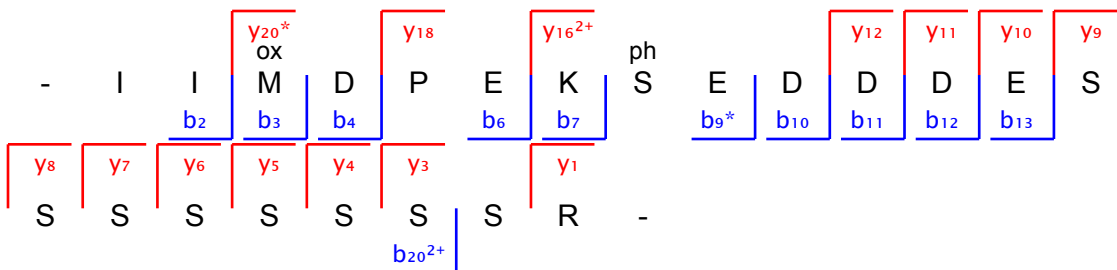

Raw file Scan Method Score m/z  
 Recip\_2\_38\_45 7251 FTMS; HCD 158.57 456.71

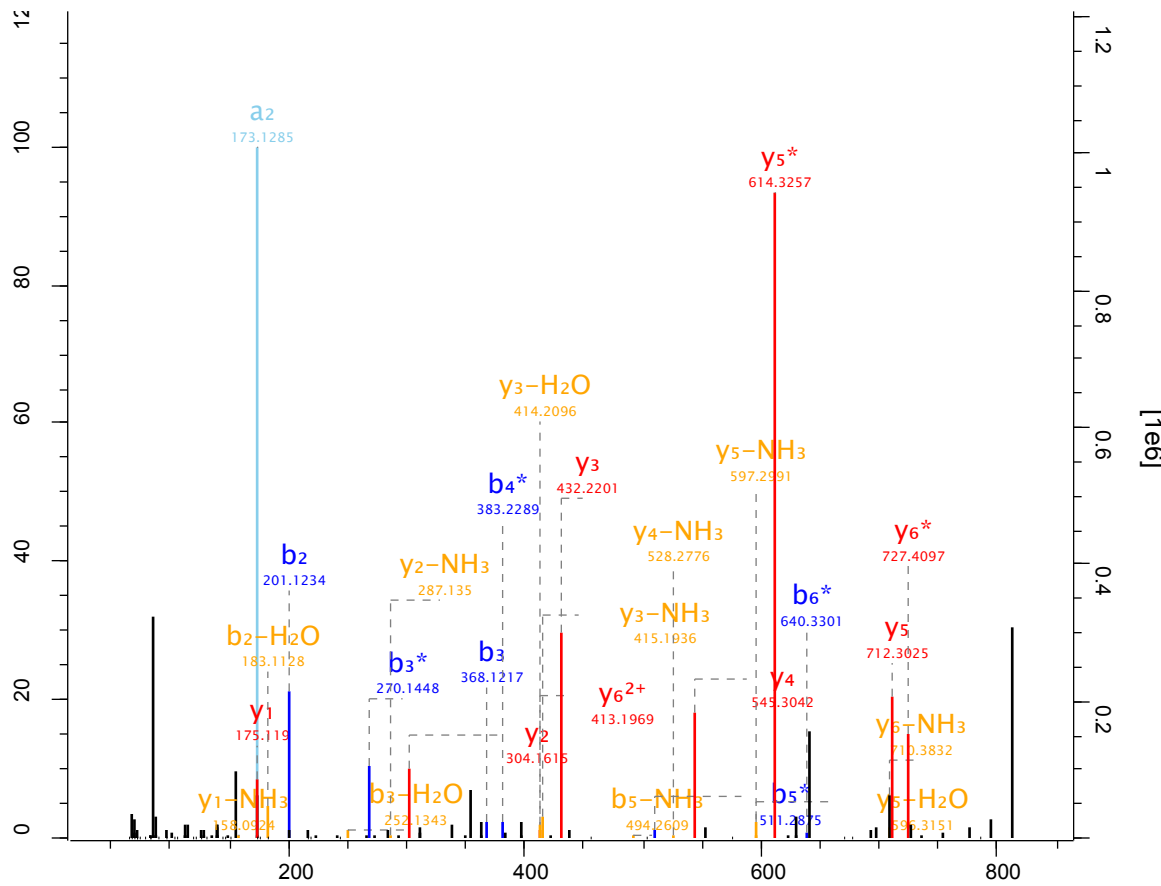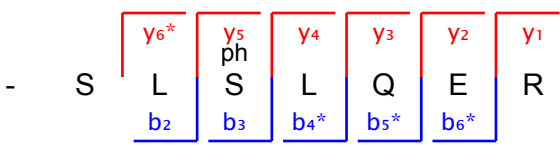

Raw file Scan Method Score m/z  
 Recip\_2\_38\_45 7449 FTMS; HCD 88.08 566.24

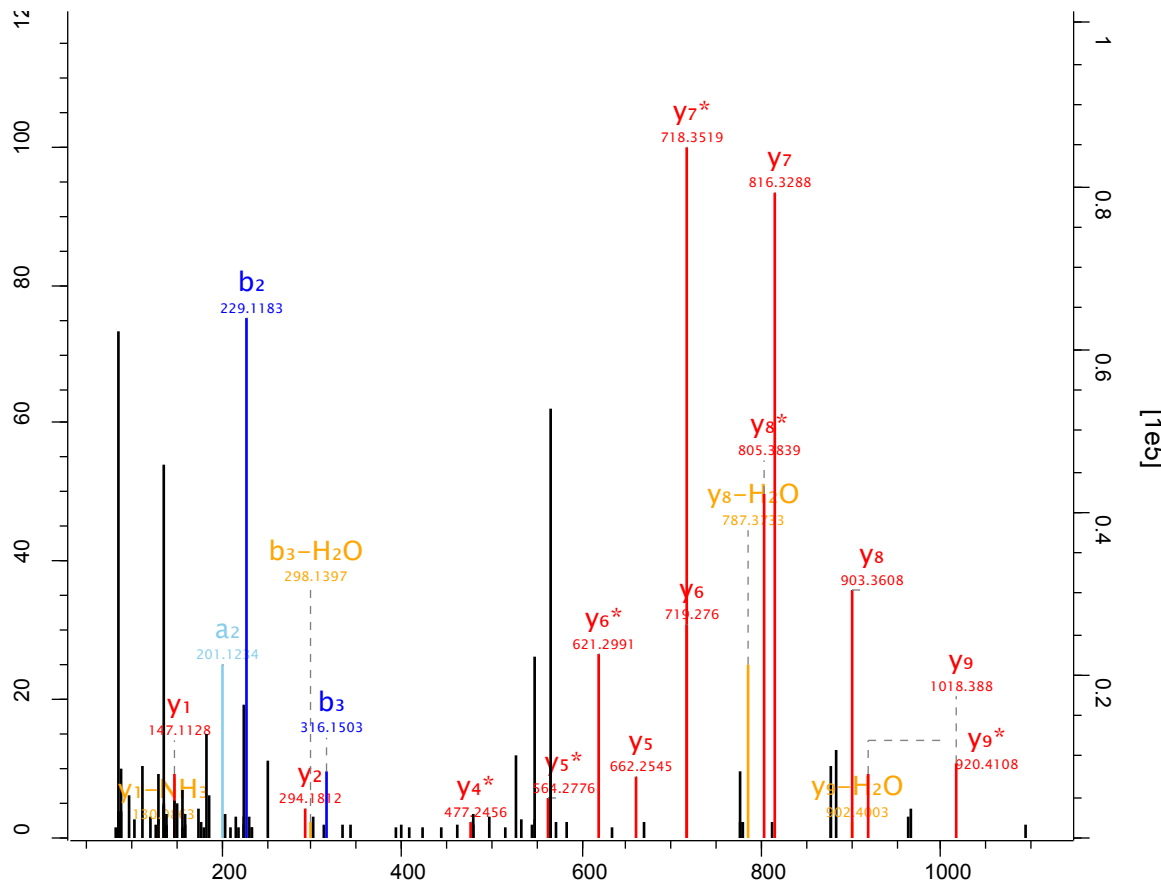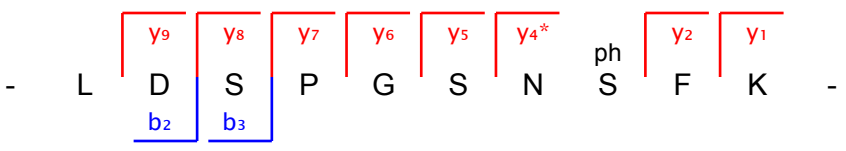

| Raw file      | Scan | Method    | Score | m/z    |
|---------------|------|-----------|-------|--------|
| Recip_2_38_45 | 7607 | FTMS; HCD | 78.08 | 831.87 |

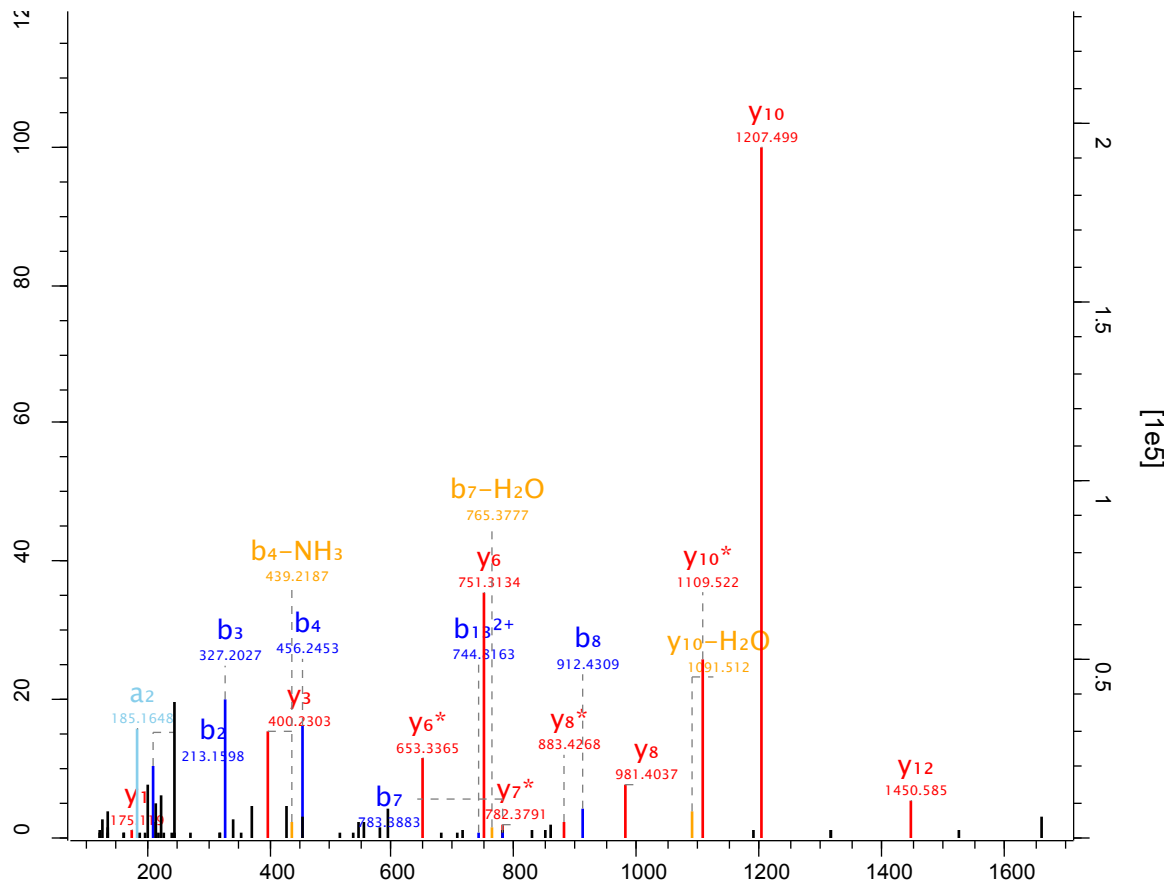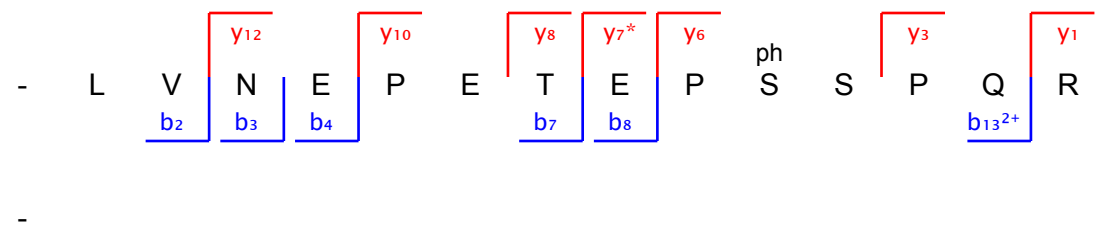

| Raw file      | Scan | Method    | Score | m/z   |
|---------------|------|-----------|-------|-------|
| Recip_2_38_45 | 7662 | FTMS; HCD | 57.86 | 452.7 |

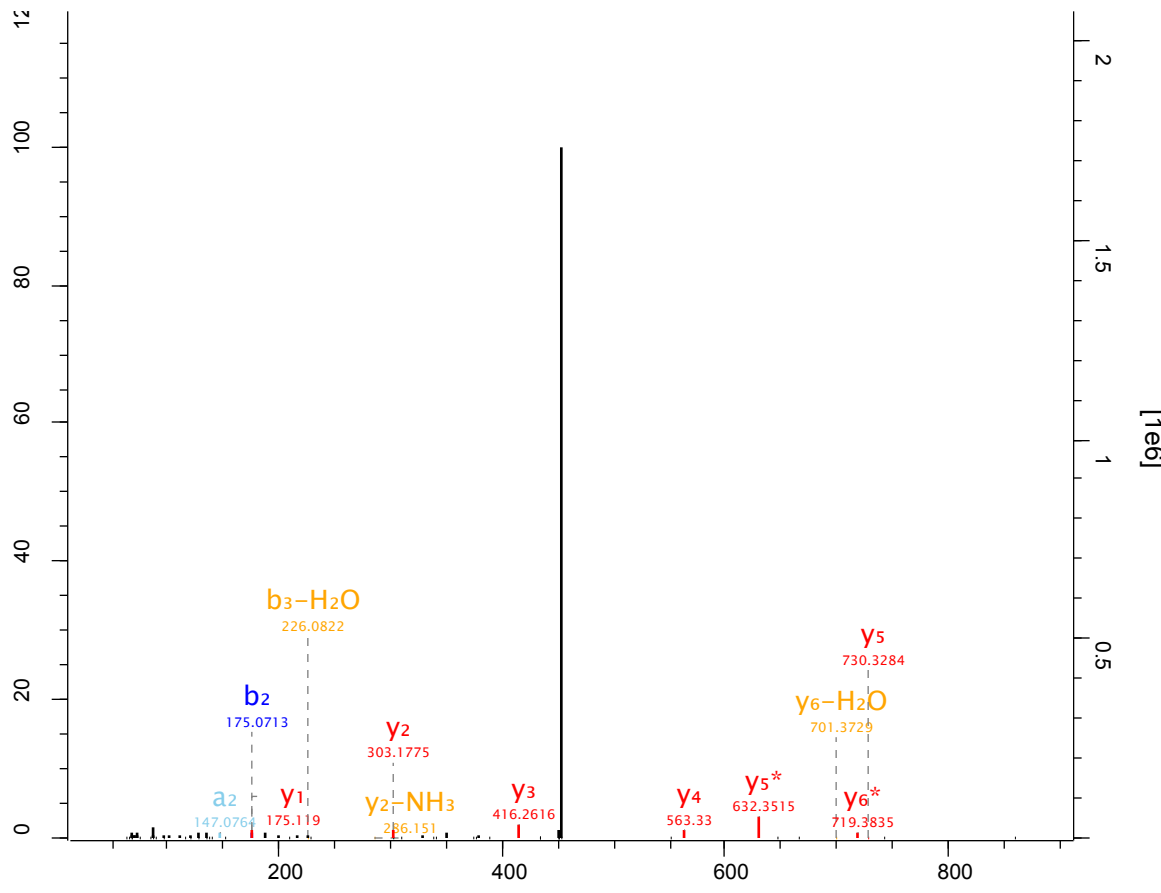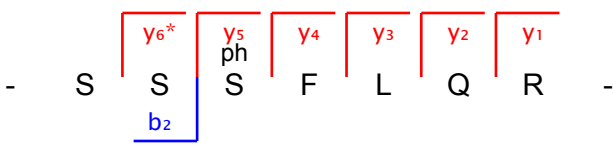

| Raw file      | Scan | Method    | Score | m/z    |
|---------------|------|-----------|-------|--------|
| Recip_2_38_45 | 7690 | FTMS; HCD | 51.29 | 491.74 |

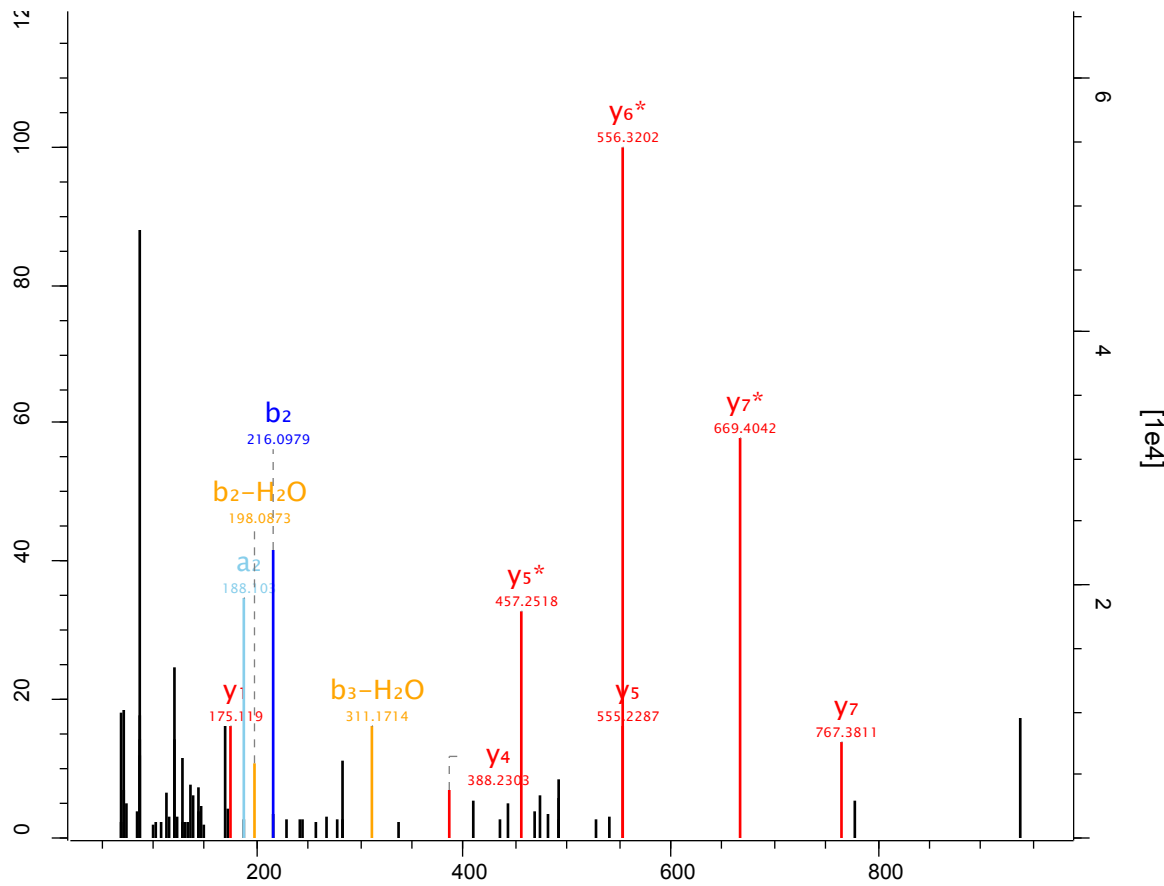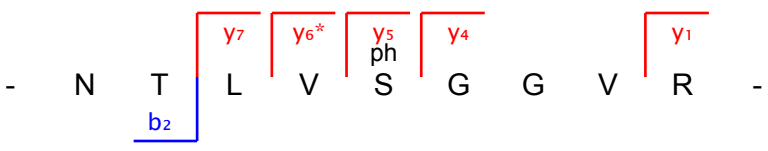

Raw file Scan Method Score m/z  
 Recip\_2\_38\_45 7866 FTMS; HCD 81.14 884.35

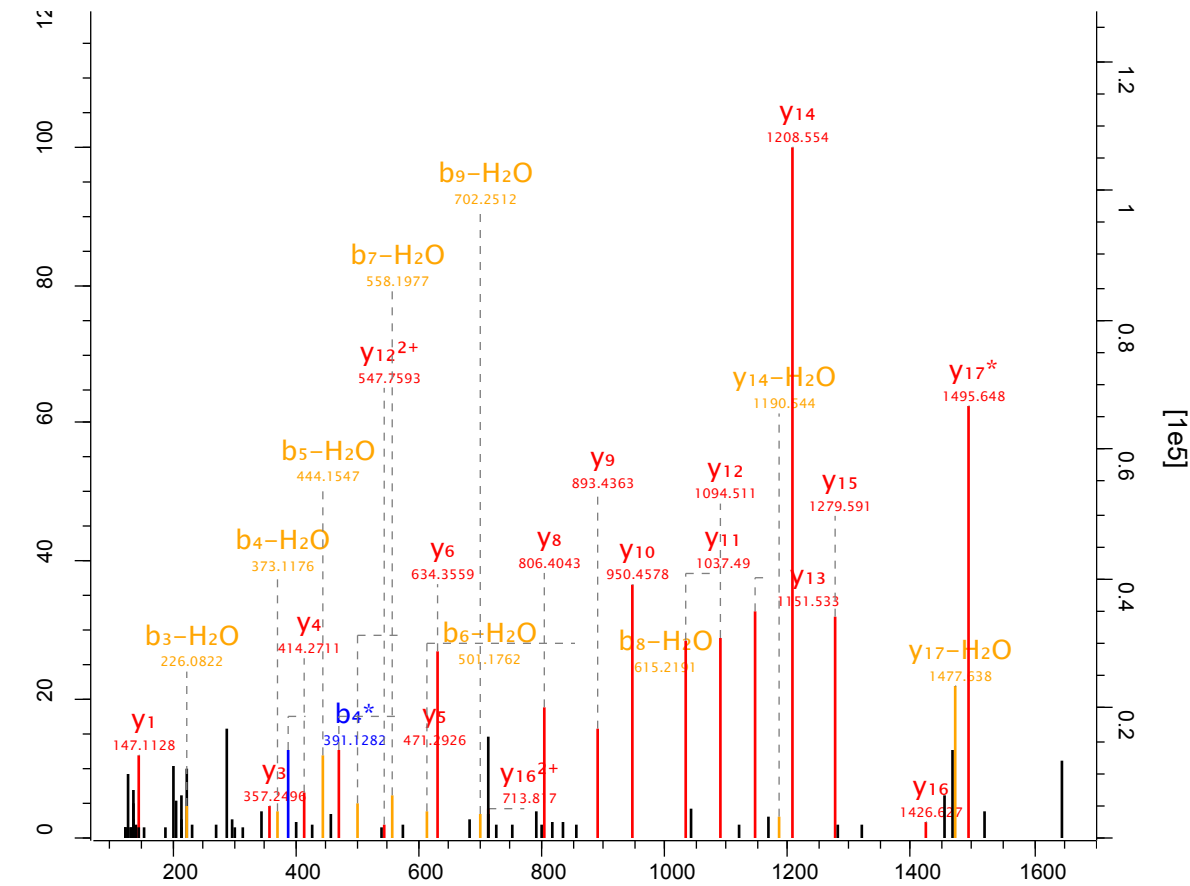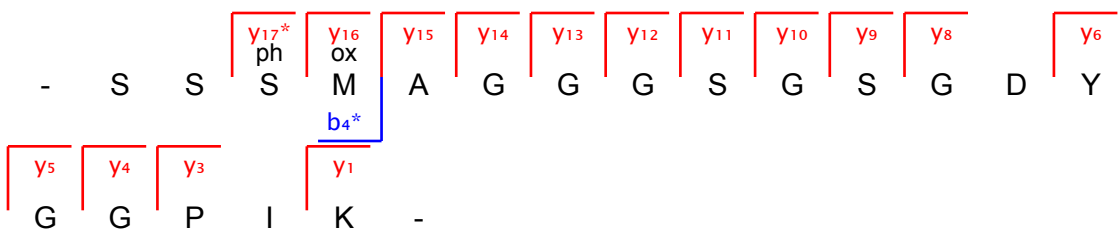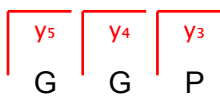

| Raw file      | Scan | Method    | Score | m/z   |
|---------------|------|-----------|-------|-------|
| Recip_2_38_45 | 7999 | FTMS; HCD | 42.08 | 504.2 |

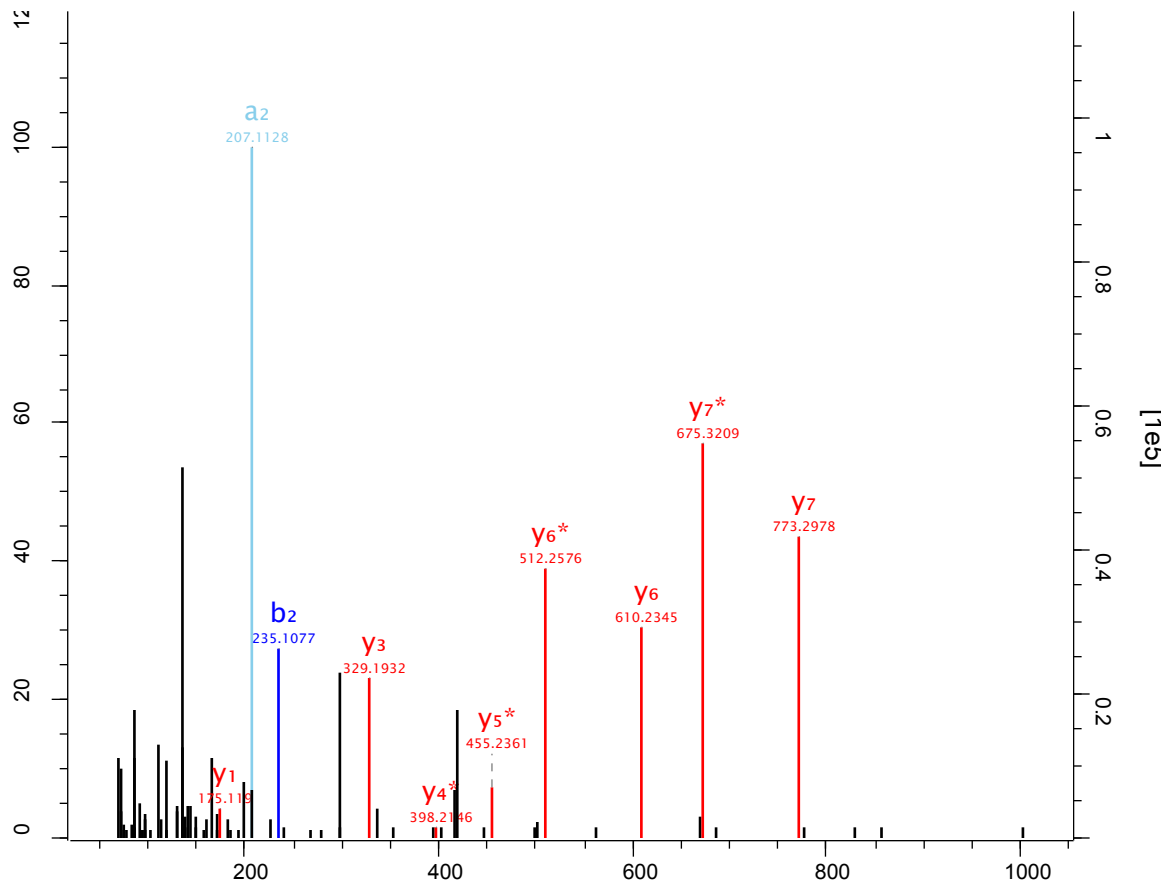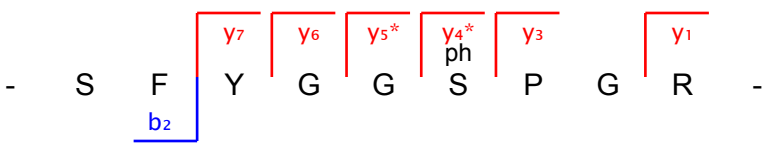



Raw file Scan Method Score m/z  
 Recip\_2\_38\_45 8123 FTMS; HCD 48.62 815.35

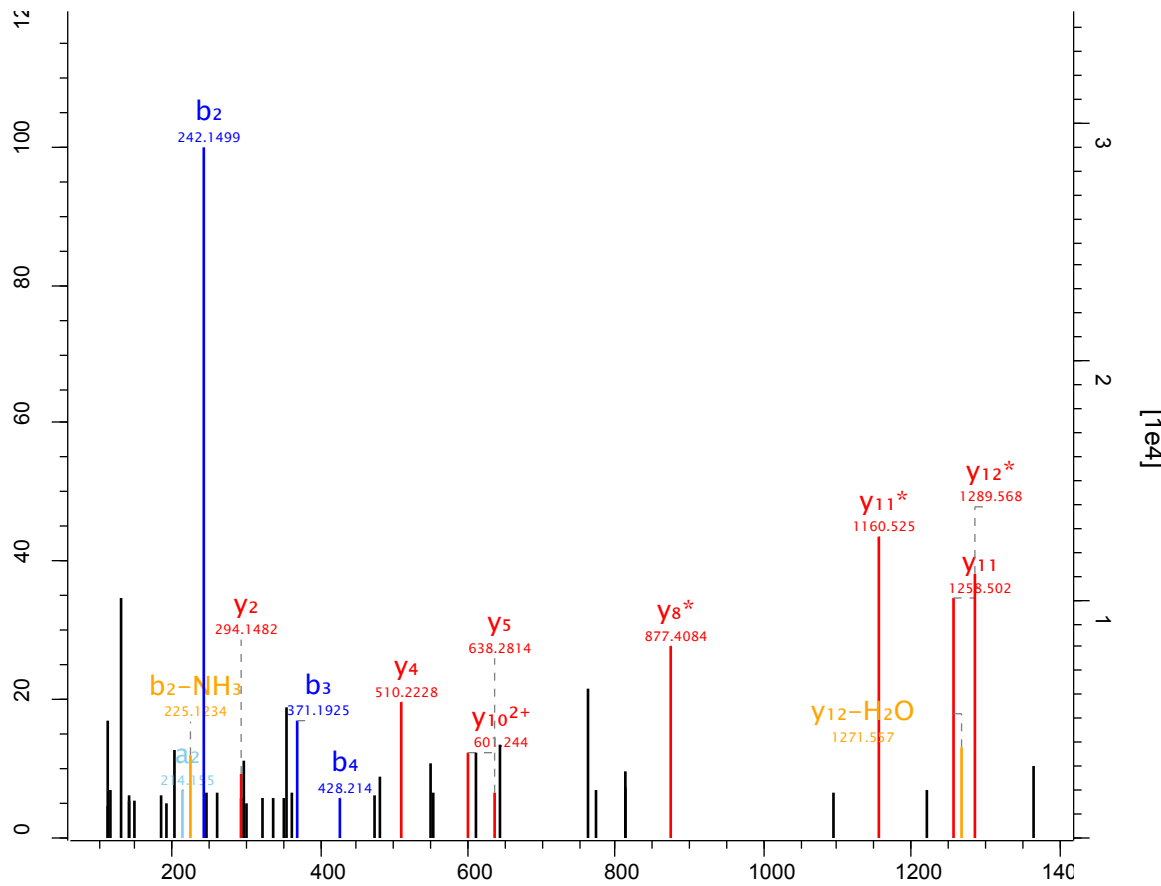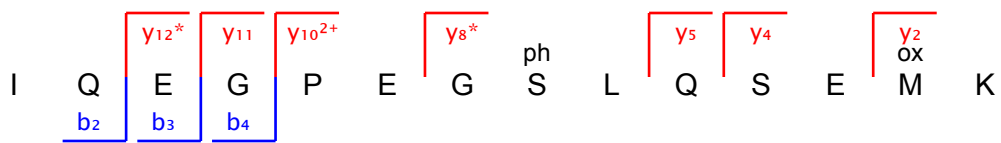

Raw file Scan Method Score m/z  
 Recip\_2\_38\_45 8870 FTMS; HCD 99.27 778.84

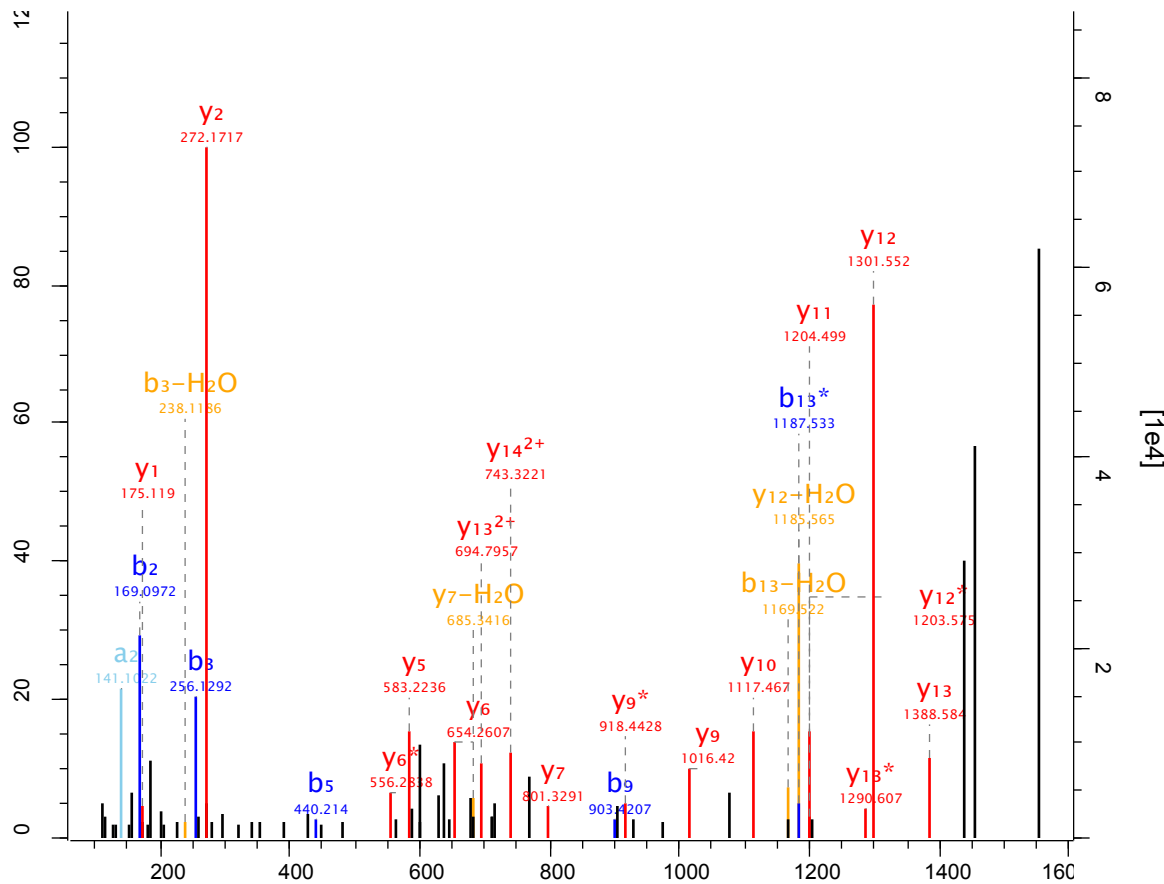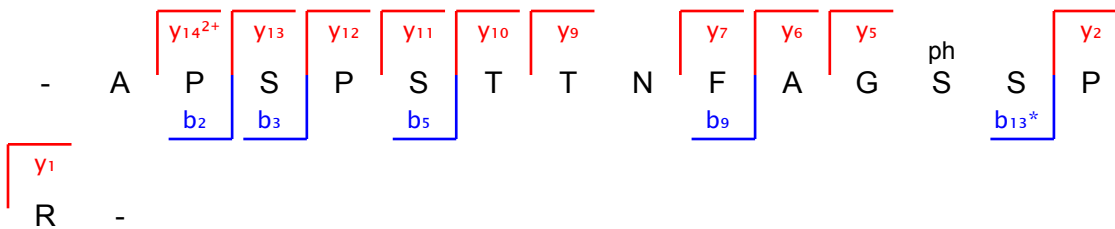

| Raw file      | Scan | Method    | Score | m/z    |
|---------------|------|-----------|-------|--------|
| Recip_2_38_45 | 8947 | FTMS; HCD | 93.84 | 605.98 |

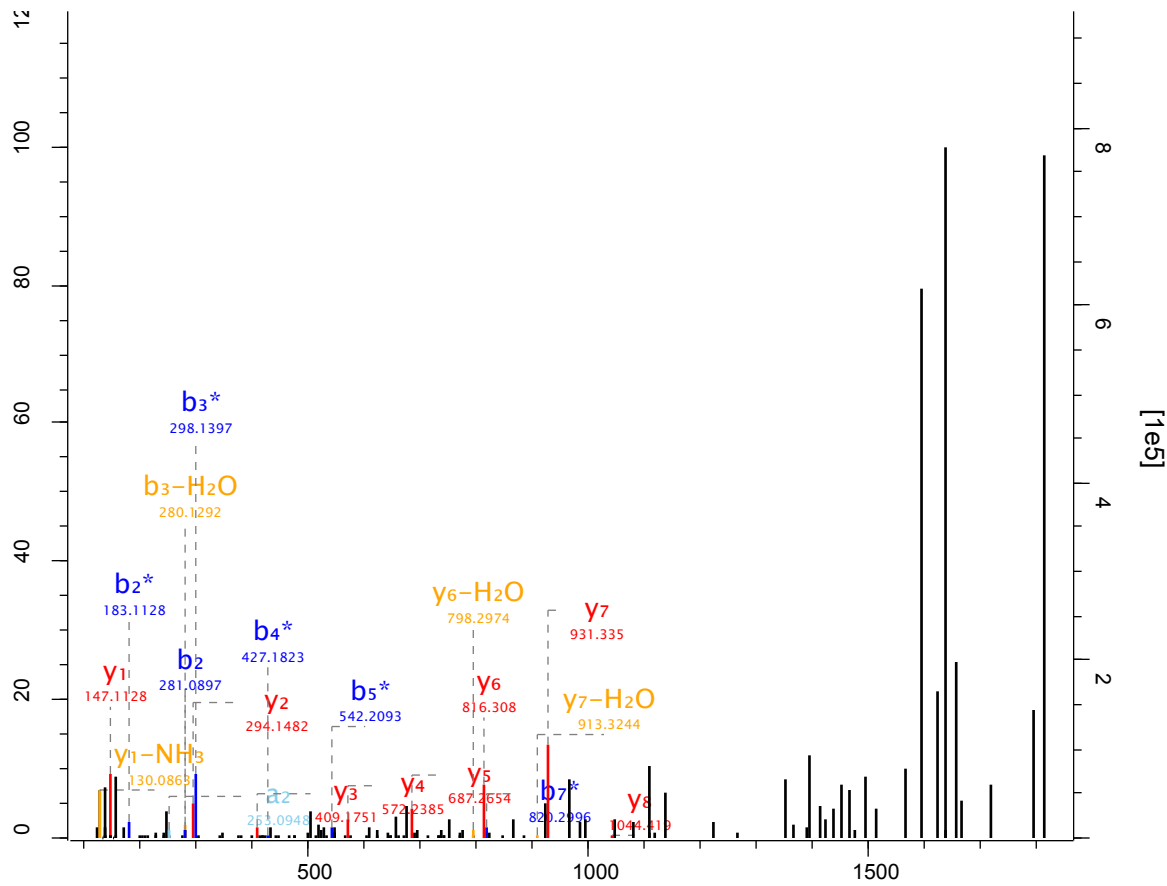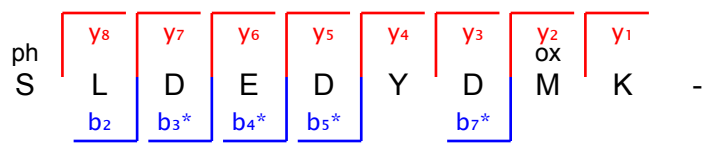

| Raw file      | Scan | Method    | Score | m/z    |
|---------------|------|-----------|-------|--------|
| Recip_2_38_45 | 8949 | FTMS; HCD | 41.7  | 506.71 |

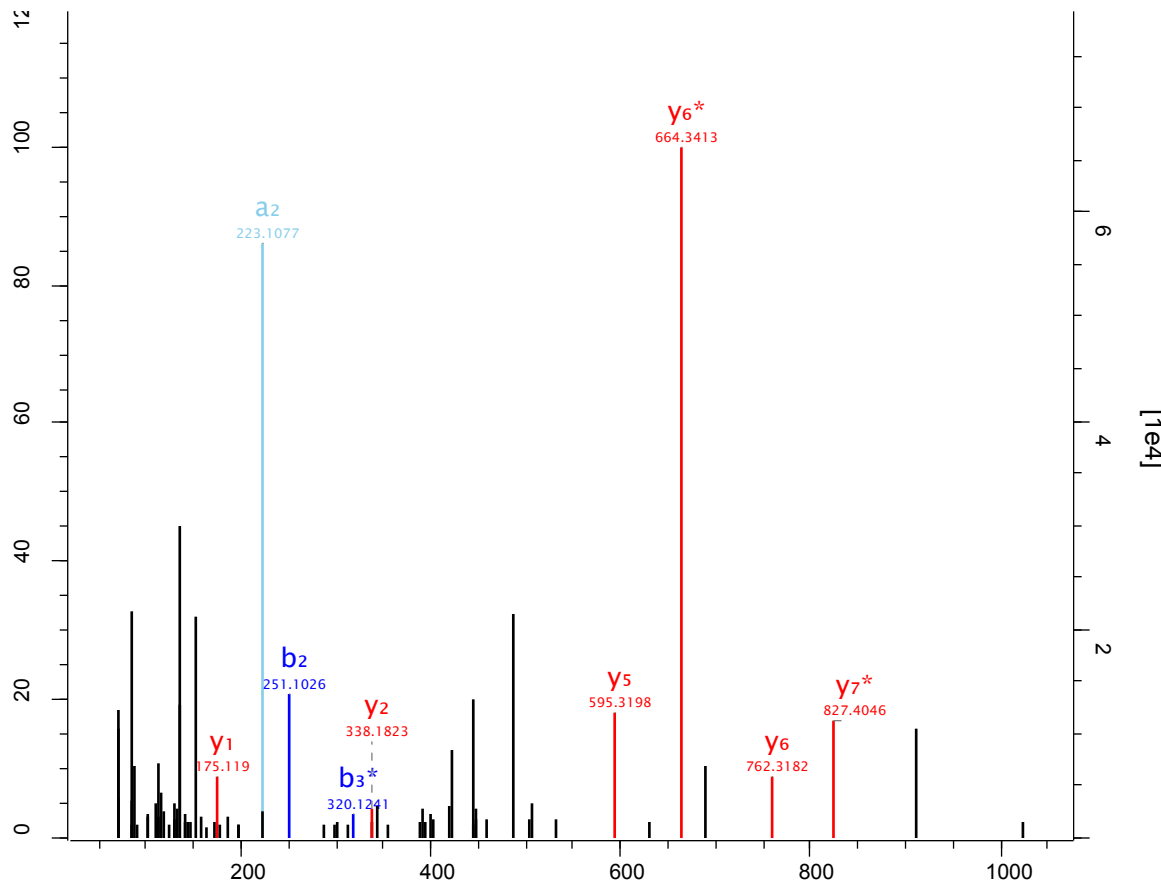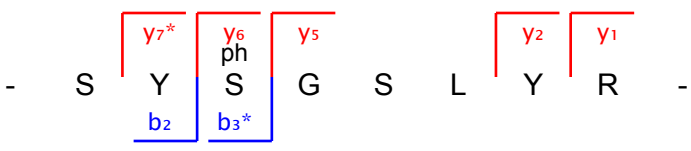

| Raw file      | Scan | Method    | Score | m/z   |
|---------------|------|-----------|-------|-------|
| Recip_2_38_45 | 8959 | FTMS; HCD | 57.53 | 464.7 |

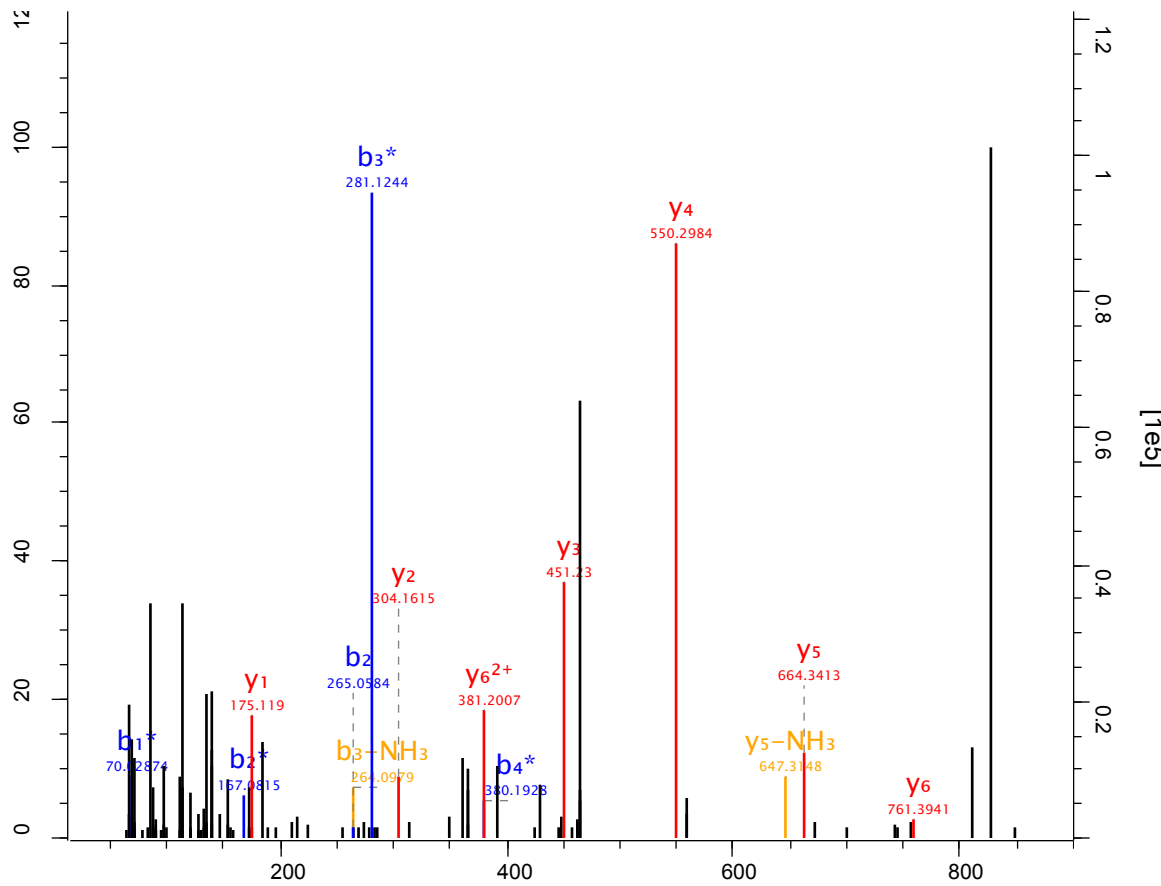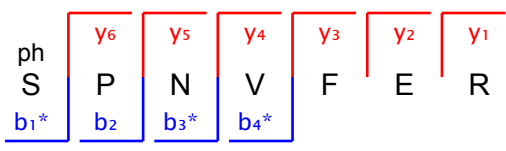

| Raw file      | Scan | Method    | Score  | m/z    |
|---------------|------|-----------|--------|--------|
| Recip_2_38_45 | 9488 | FTMS; HCD | 136.52 | 484.73 |

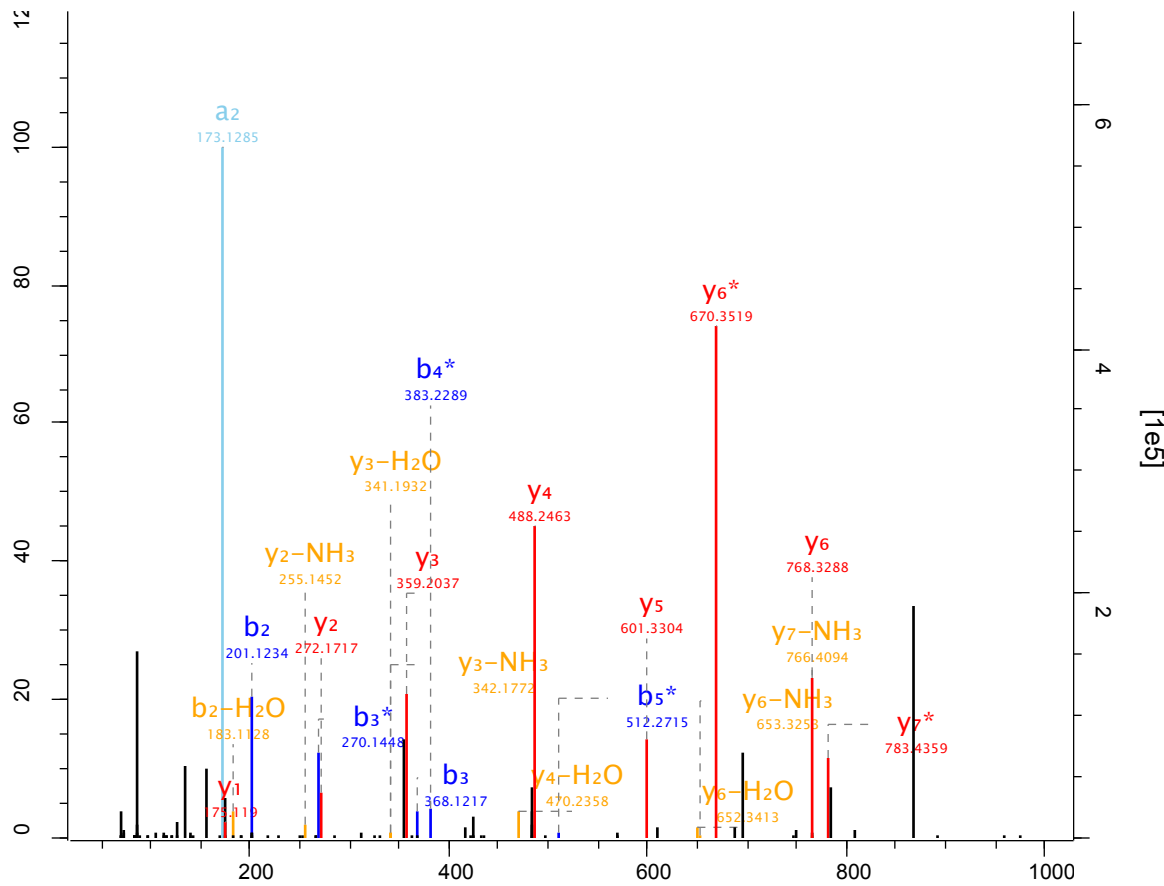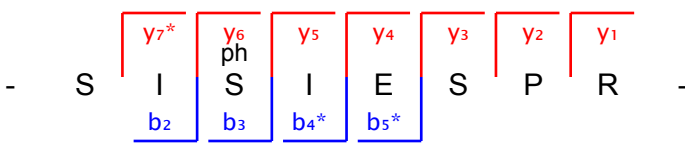

Raw file Scan Method Score m/z  
 Recip\_2\_38\_45 9957 FTMS; HCD 123.1 629.28

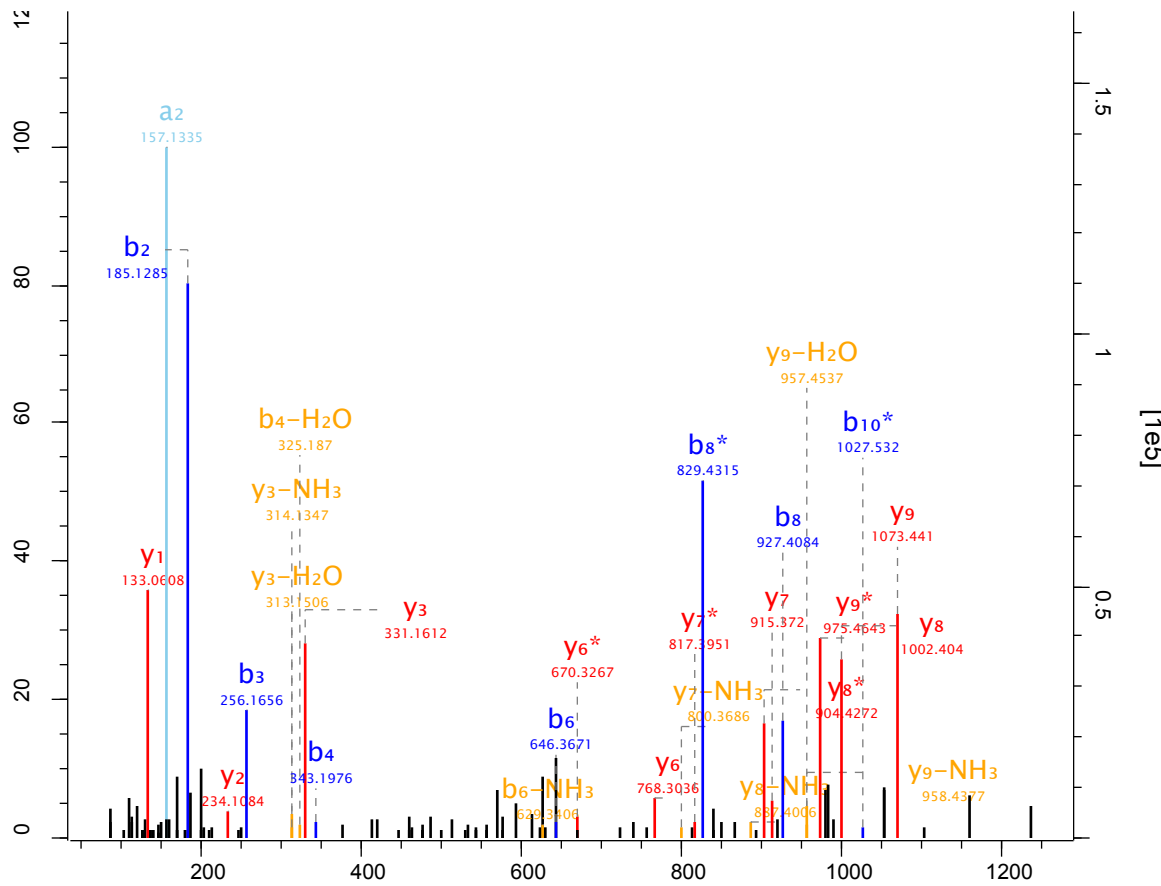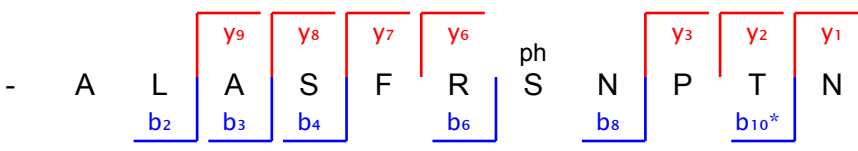

Supplement: 10.1074_M116.060129_mcp.M116.060129-5.pdf [file 10.1074_M116.060129_mcp.M116.060129-5.pdf]
