# Supplementary material
Source: PubMed Central journal article supplement (PMC5013305)

A

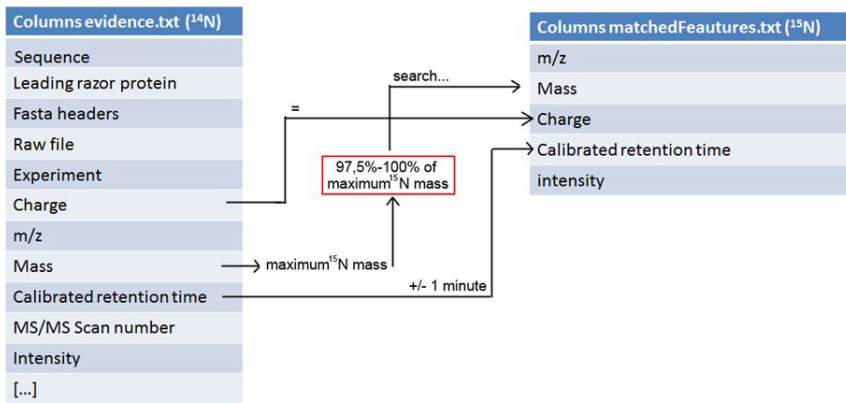

B

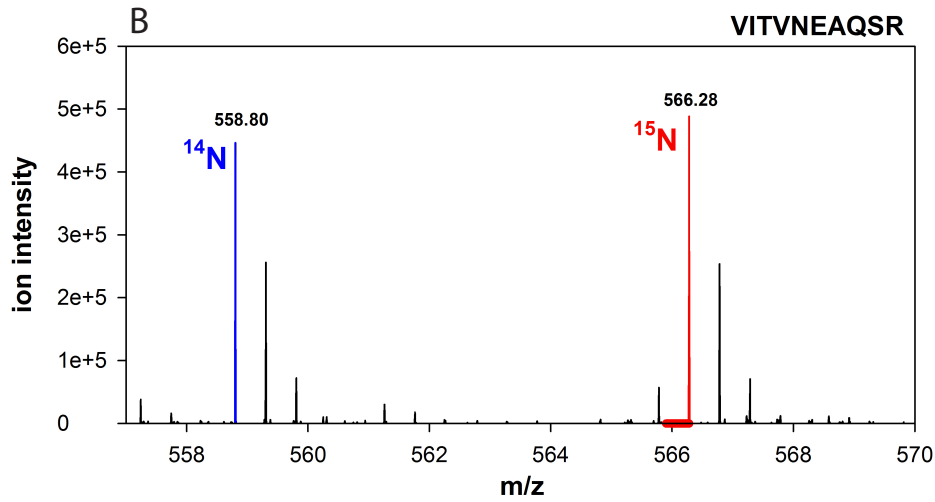

Supplement: 10.1074_M116.060129_mcp.M116.060129-1.pdf [file 10.1074_M116.060129_mcp.M116.060129-1.pdf]

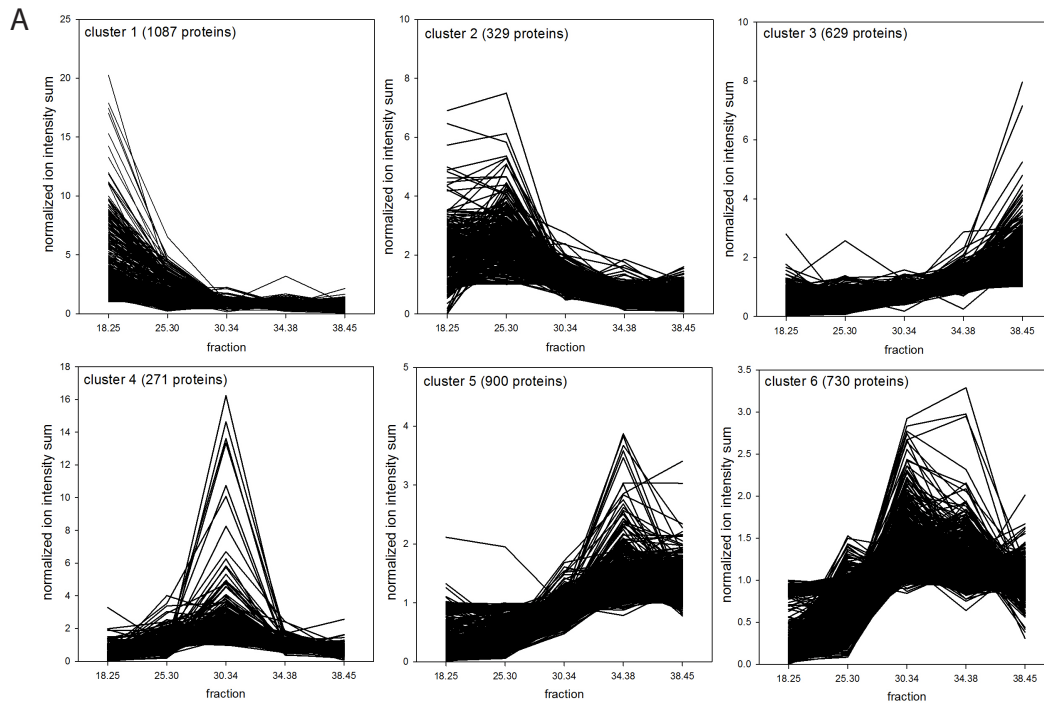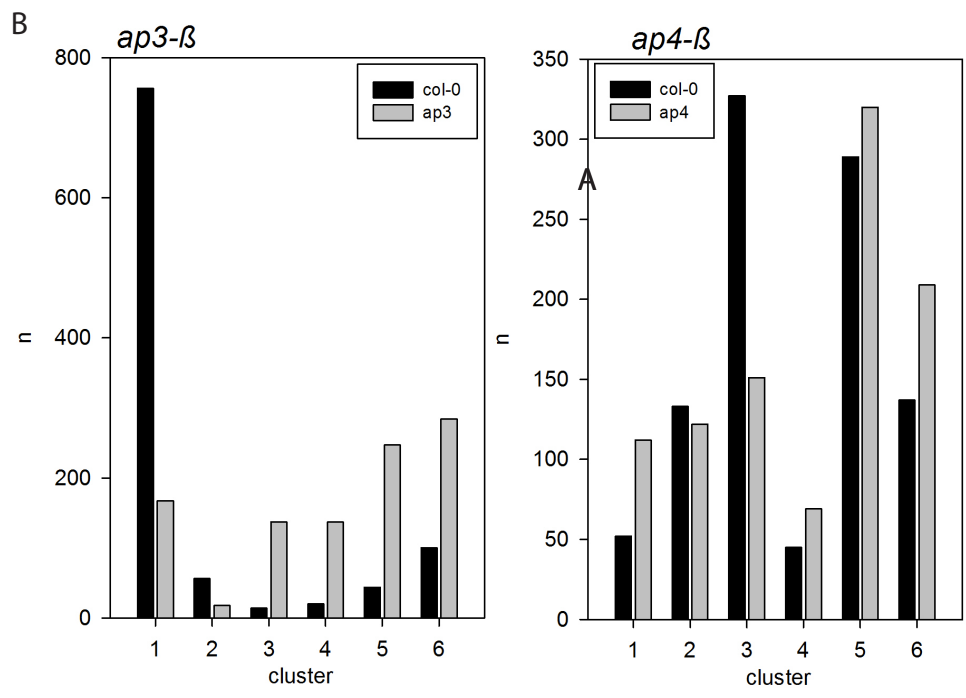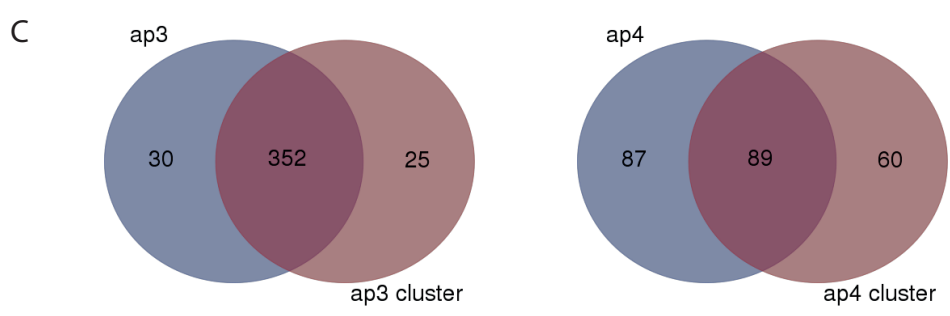

Supplement: 10.1074_M116.060129_mcp.M116.060129-2.pdf [file 10.1074_M116.060129_mcp.M116.060129-2.pdf]

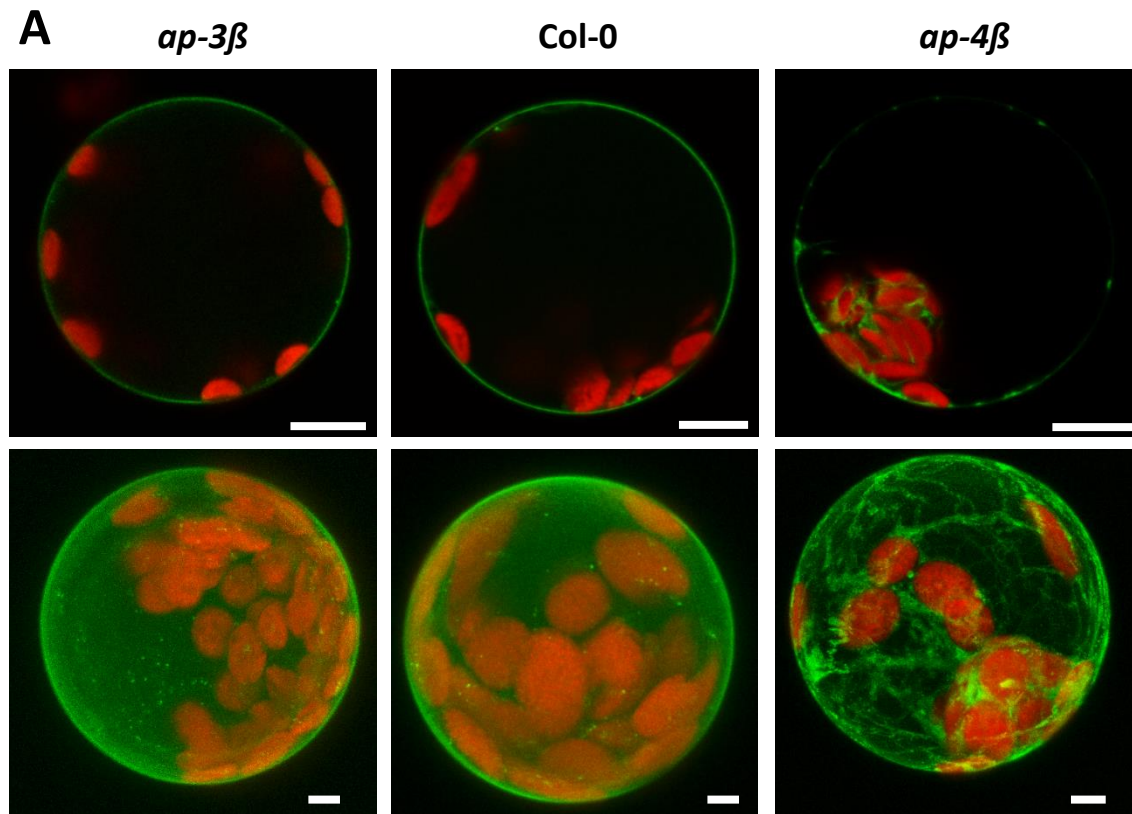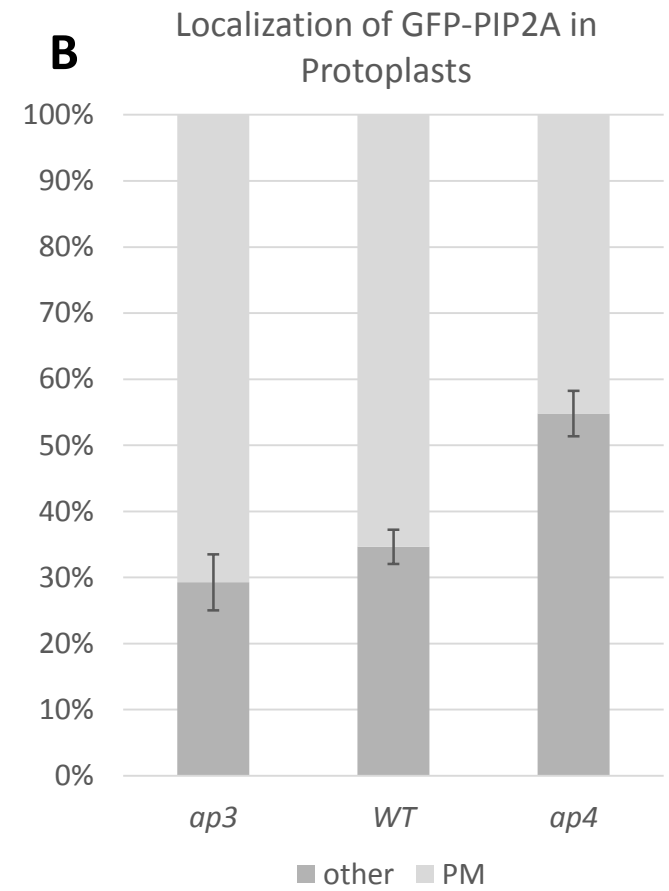

Supplement: 10.1074_M116.060129_mcp.M116.060129-3.pdf [file 10.1074_M116.060129_mcp.M116.060129-3.pdf]

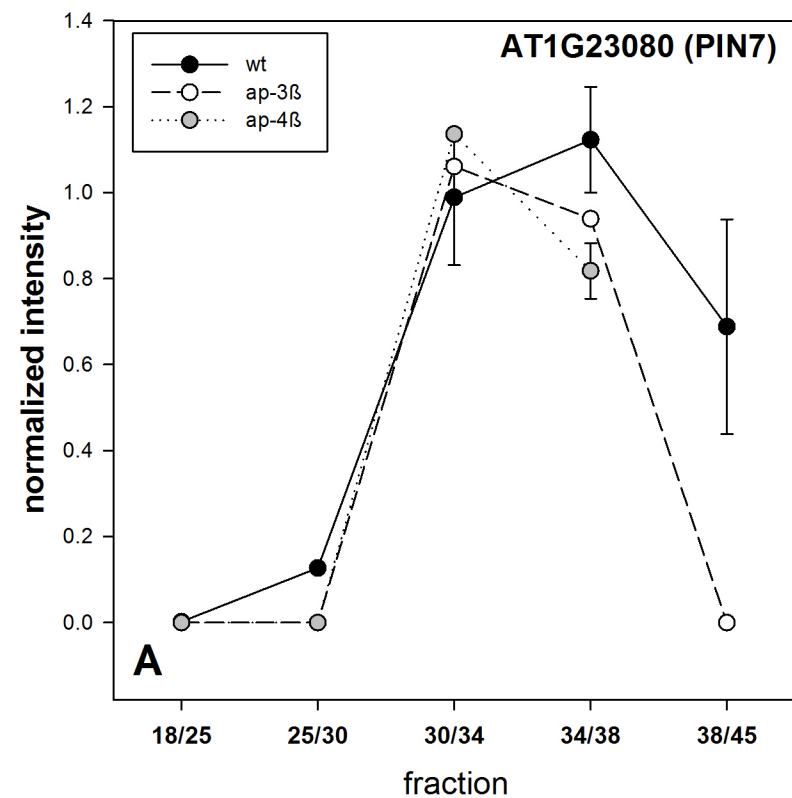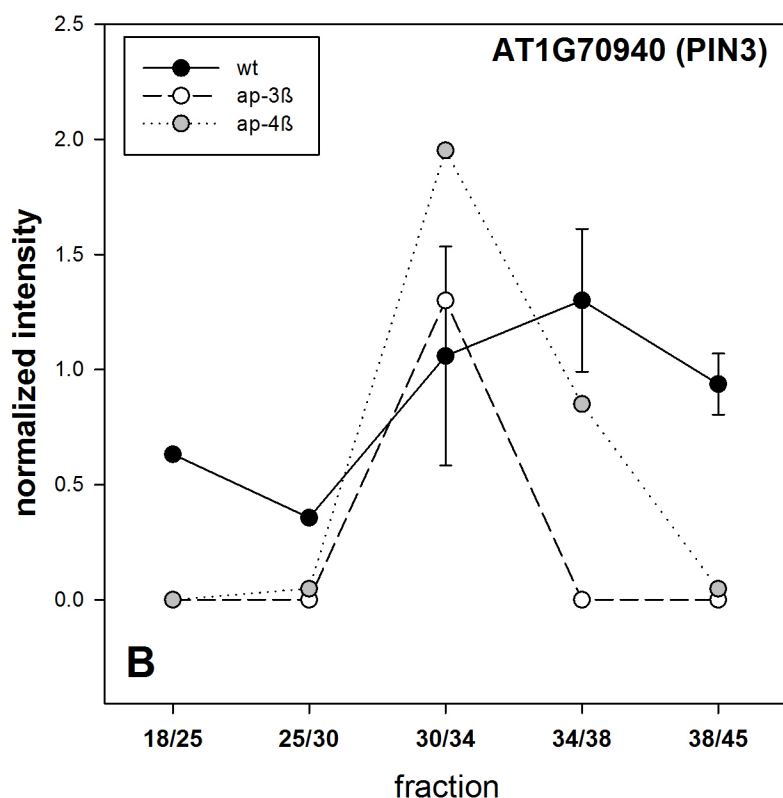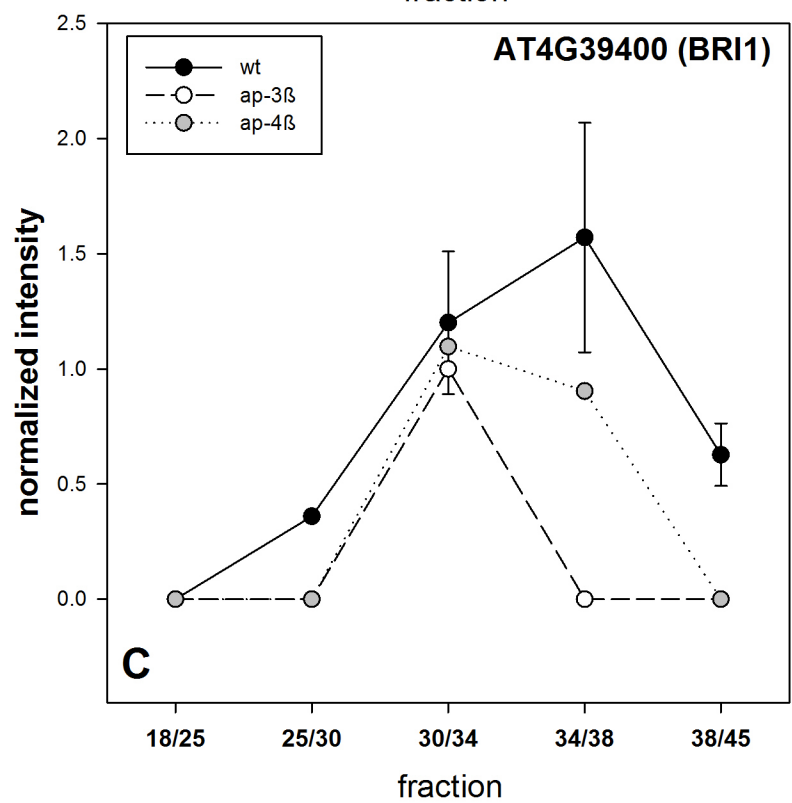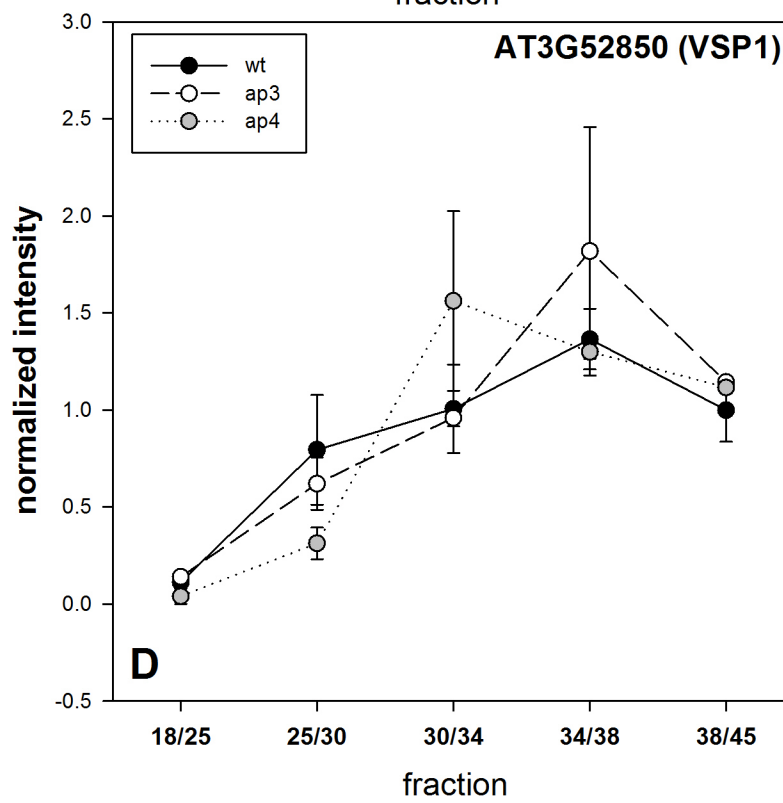

Supplement: 10.1074_M116.060129_mcp.M116.060129-4.pdf [file 10.1074_M116.060129_mcp.M116.060129-4.pdf]
